# Supplementary material for: Global, regional, and national trends in under-5 mortality between 1990 and 2019 with scenario-based projections until 2030: a systematic analysis by the UN Inter-agency Group for Child Mortality Estimation
Source: PubMed Central journal article supplement (PMC8789561; doi:10.1016/s2214-109x(21)00515-5), 2022-01-18

# THE LANCET

## Global Health

### Supplementary appendix

This appendix formed part of the original submission and has been peer reviewed. We post it as supplied by the authors.

Supplement to: Sharrow D, Hug L, You D, et al. Global, regional, and national trends in under-5 mortality between 1990 and 2019 with scenario-based projections until 2030: a systematic analysis by the UN Inter-agency Group for Child Mortality Estimation. *Lancet Glob Health* 2022; **10**: e195–206.

# Supplementary appendix to Global, regional and national trends in under-5 mortality 1990-2019 with scenario-based projections to 2030: a systematic analysis by the United Nations Inter-agency Group for Child Mortality Estimation

## Contents

|                                                                                                                              |    |
|------------------------------------------------------------------------------------------------------------------------------|----|
| 1. Methods.....                                                                                                              | 2  |
| 1.1. Overview .....                                                                                                          | 2  |
| 1.2. Data sources.....                                                                                                       | 2  |
| Civil registration data .....                                                                                                | 3  |
| Survey Data .....                                                                                                            | 4  |
| Adjustment for missing mothers in high-HIV-prevalence settings .....                                                         | 5  |
| Systematic and random measurement error.....                                                                                 | 6  |
| 1.3. Estimating levels and trends in under-5 mortality rate .....                                                            | 6  |
| Summary .....                                                                                                                | 6  |
| Splines regression .....                                                                                                     | 7  |
| Adjustment for rapidly changing child mortality driven by HIV/AIDS .....                                                     | 9  |
| 1.4. Estimating levels and trends in neonatal mortality rate.....                                                            | 10 |
| 1.5. Calculating number of deaths.....                                                                                       | 11 |
| 1.6. Child mortality due to conflict and environmental disasters .....                                                       | 11 |
| 2. Regional Classifications.....                                                                                             | 13 |
| 2.1. UNICEF classifications .....                                                                                            | 13 |
| 2.2. World Bank classifications .....                                                                                        | 14 |
| 3. Supplementary tables .....                                                                                                | 16 |
| 3.1. Table A.1 Levels and trends in U5MR, by country, 1990-2019.....                                                         | 16 |
| 3.2. Table A.2 Levels and trends in NMR, by country, 1990-2019.....                                                          | 23 |
| 3.3. Table A.3 Number of under-5 and neonatal deaths, by country, 1990-2019.....                                             | 30 |
| 3.4. Table A.4 Series in U5MR database .....                                                                                 | 38 |
| 4. Supplementary figures.....                                                                                                | 81 |
| 4.1. Figure A.1 Trends in U5MR, NMR, and number of under-5 deaths, 1990-2019, with 90% uncertainty intervals, by region..... | 81 |
| 4.2. Figure A.2 Annual rate of reduction 2010-2019 and required annual rate of reduction to achieve SDG target.....          | 82 |

|      |                                                                                               |     |
|------|-----------------------------------------------------------------------------------------------|-----|
| 4.3. | Figure A.3 Projected global under-5 mortality rate and the number of under-5 deaths 2020-2030 | 83  |
| 4.4. | Figure A.4 Under-five mortality estimates with underlying data, by country .....              | 84  |
| 4.5. | Figure A.5 Neonatal mortality estimates with underlying data, by country .....                | 280 |

## 1. Methods

### 1.1. Overview

UN IGME follows the following broad strategy to arrive at annual estimates of child mortality:

1. Compile and assess the quality of all available nationally representative data relevant to the estimation of child mortality, including data from vital registration systems, population censuses, household surveys and sample registration systems;
2. Assess data quality, recalculate data inputs and make adjustments as needed by applying standard methods;
3. Fit a statistical model to these data to generate a smooth trend curve that averages possibly disparate estimates from the different data sources for a country;
4. Extrapolate the model to a target year (in this case, mid-2019).

To increase the transparency of the estimation process, UN IGME has developed a child mortality web portal, Child Mortality Estimation (CME) Info, available at <[www.childmortality.org](http://www.childmortality.org)>. It includes all available data and shows estimates for each country as well as which data are currently officially used by UN IGME. Once new estimates are finalized, CME Info is updated accordingly.

UN IGME applies a common methodology across countries and uses original empirical data from each country. However, it does not report figures produced by individual countries using other methods, which would not be comparable to other country estimates. Applying a consistent methodology allows for comparisons between countries, despite the varied number and types of data sources.

UN IGME estimates are based on nationally available data from censuses, surveys, vital registration systems or sample registration systems. UN IGME does not use covariates to derive its estimates but rather, applies a curve-fitting method to empirical data after data quality assessment. Countries often use a single source for their official estimates or apply methods different to those used by UN IGME. The differences between UN IGME and national official estimates are usually not large if the empirical data are of good quality. UN IGME aims to minimize errors for each estimate, harmonize trends over time, and produce up to date and properly evaluated estimates of child mortality. Because errors are inevitable in data, there will always be uncertainty around data and estimates, both nationally and internationally. To allow for added comparability, UN IGME generates all child mortality estimates with uncertainty bounds.

### 1.2. Data sources

The first step in the process of arriving at estimates of levels and recent trends of child mortality is to compile all newly available data and add the data to the UN IGME database (newly available may include newer, recently released data and occasionally, results from older censuses or surveys not previously available). Nationally representative estimates of under-five mortality can be derived from several

different sources, including civil registration and sample surveys. Demographic surveillance sites and hospital data are excluded as they are rarely nationally representative. The preferred source of data is a civil registration system that records births and deaths on a continuous basis. If registration is complete and this system functions efficiently, the resulting estimates will be accurate and timely. However, many low- and middle-income countries do not have well-functioning vital registration (VR) systems. Therefore, household surveys such as the UNICEF-supported Multiple Indicator Cluster Surveys, the USAID-supported Demographic and Health Surveys, and periodic population censuses have become the primary sources of data on mortality among children under age 5. These surveys ask women about the survival of their children and it is these reports (or microdata upon availability) that provide the basis of child mortality estimates for a majority of low- and middle-income countries.

Whatever the method used to derive the estimates, data quality is critical. UN IGME assesses data quality and does not include data sources with substantial non-sampling errors or omissions as underlying empirical data in its statistical model.

The full set of empirical data used in this analysis is publicly available from the UN IGME web portal, CME Info <[www.childmortality.org](http://www.childmortality.org)>. The web portal also includes data that have been excluded and indicates the fact.

#### Civil registration data

Data from civil registration systems are the preferred data source for child mortality estimation. For data from civil registration, the calculation of U5MR and IMR is derived from a standard period abridged life table. The inputs are number of deaths for age group <1 year (noted  $D_0$ ) and for the age group 1-4 years ( $D_{1-4}$ ), as well as the mid-year population for the same age groups ( $P_0$  and  $P_{1-4}$ ).

The formulae are as follows:

Given that:

${}_nq_x$  is the probability of dying between age  $x$  and age  $x+n$ ,

${}_1M_0 = D_0/P_0$ , death rate for age <1,

${}_4M_1 = D_{1-4}/P_{1-4}$ , death rate for age group 1-4,

Then:

$${}_1q_0 = {}_1M_0 / [1 + (1 - {}_1a_0) * {}_1M_0]$$

where  ${}_1a_0$  is the fraction of year lived by an infant who died

${}_1a_0 = 0.1$  for low mortality country and  ${}_1a_0 = 0.3$  for high mortality country

$${}_5q_0 = 1 - (1 - {}_1q_0) * (1 - {}_4q_1)$$

where  ${}_4q_1 = 4 * {}_4M_1 / [1 + (4 - {}_4a_1) * {}_4M_1]$

where  ${}_4a_1$  is the fraction of years lived by a child aged 1-4 years who died

$${}_4a_1 = 1.6$$

Finally:  $IMR = {}_1q_0 * 1000$  and  $U5MR = {}_5q_0 * 1000$



For NMR, the number of deaths under 28 days of age and live births are used to calculate the neonatal mortality rate.

For civil registration data (with available data on the number of deaths and mid-year populations), annual observations were initially constructed for all observation years in a country. For country-years in which the coefficient of variation exceeded 10 per cent for children under 5 years, deaths and mid-year populations were pooled over longer periods. Starting from more recent years, deaths and population were combined with one or more previous years to reduce spurious fluctuations in countries where small numbers of births and deaths were observed. The coefficient of variation is defined to be the stochastic standard error of the 5q0 ( $5q0=U5MR/1,000$ ) observation divided by the value of the 5q0 observation. The stochastic standard error of the observation is calculated using a Poisson approximation using live birth numbers, given by  $\sqrt{5q0/lb}$ , where  $lb$  is the number of live births in the year of the observation. After this recalculation of the civil registration data, the standard errors are set to a minimum of 2.5 per cent for input into the model following the original model specification<sup>1</sup>. A similar approach was used for neonatal mortality. Figure 1 illustrates the recalculation of civil registration data for Iceland.

Figure 1 Illustration of the recalculation of civil registration data for Iceland. Black dots refer to annual observations while red dots refer to the recalculated observations with longer observation periods, with 95% observation-specific uncertainty intervals

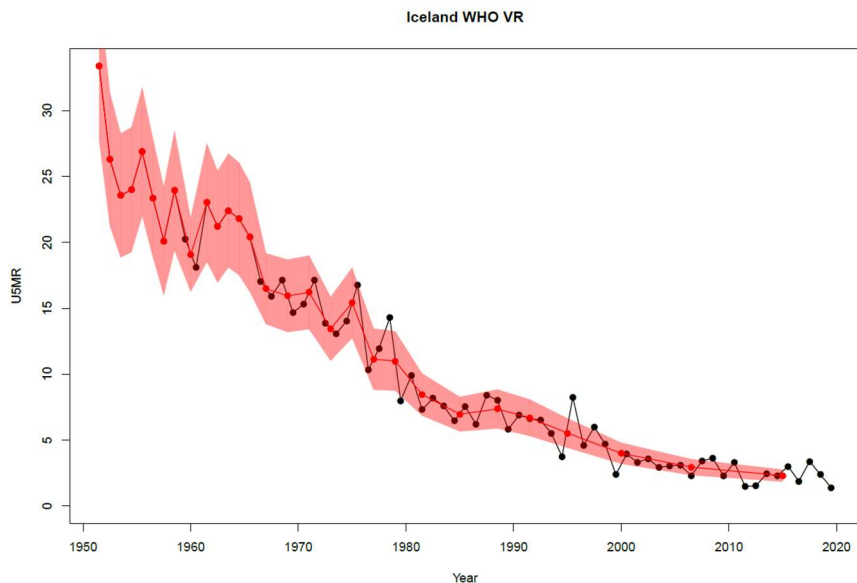

### Survey Data

The majority of survey data on under-five mortality is collected in one of two ways: the full birth history (FBH), whereby women are asked for the date of birth of each of their children, whether the child is still alive, and if not, the age at death; and the summary birth history (SBH), whereby women are asked only about the number of their children ever born and the number that have died (or equivalently the number still alive).

<sup>1</sup> Alkema L, New JR. Global estimation of child mortality using a Bayesian B-spline bias-reduction method. The Annals of Applied Statistics. 2014; 8: 2122–49.

FBH data, collected by all Demographic and Health Surveys (DHS) and increasingly also by Multiple Indicator Cluster Surveys (MICS), allow the calculation of child mortality indicators for specific time periods in the past. DHS and MICS usually publish under-five child mortality estimates for three 5-year periods before the survey, that is, 0 to 4, 5 to 9, and 10 to 14 years before the survey.<sup>2,3,4</sup> UN IGME has re-calculated estimates for calendar year periods, using single calendar years for periods shortly before the survey, and then gradually increasing the number of years for periods further in the past, whenever microdata from the survey are available. The cut-off points for a given survey for shifting from estimates for single calendar years to two years, or two years to three, etc., are based on the coefficients of variation (a measure of sampling uncertainty) of the estimates<sup>5</sup>.

In general, SBH data, collected by censuses and many household surveys, use the age of the woman as an indicator of the exposure time of her children to the risk of death and use models to estimate under-five mortality indicators for periods in the past for women aged 25 to 29 through 45 to 49. This method is well known but has several shortcomings. Starting with the 2014 round of estimation, the UN IGME changed the method of estimation for summary birth histories to one based on classification of women by the time that has passed since their first birth. This newer method has several benefits over the previous one: First, it generally has lower sampling errors. Second, it avoids the problematic assumption that the estimates derived for each age group adequately represent the mortality of the whole population. As a result, it has less susceptibility to the selection effect of young women who give birth early, since all women who give birth necessarily must have a first birth and therefore are not selected for. Third, the method tends to show less fluctuation across time, in particular in countries with relatively low fertility and mortality. The IGME considers the improvements in the estimates based on time since first birth worthwhile when compared to the estimates derived from the classification by age of mother, hence in cases where the microdata is available, the UN IGME has reanalysed the data using the new method. Child mortality estimates from SBH data were not included if estimates from FBH data in the same survey were available<sup>6</sup>.

SBH data are not used to derive neonatal mortality.

#### Adjustment for missing mothers in high-HIV-prevalence settings

In populations severely affected by HIV/AIDS, HIV-positive (HIV+) children will be more likely to die than other children and will also be less likely to be reported since their mothers will have been more likely to

---

<sup>2</sup> <http://mics.unicef.org/tools>

<sup>3</sup> Croft, Trevor N., Aileen M. J. Marshall, Courtney K. Allen, et al. Guide to DHS Statistics. Rockville, Maryland, USA: ICF. 2018

<sup>4</sup> Hill, K. Chapter 15, Child Mortality in Moultrie TA, RE Dorrington, AG Hill, K Hill, IM Timæus and B Zaba (eds). 2013. Tools for Demographic Estimation. Paris: International Union for the Scientific Study of Population. [demographicestimation.iussp.org](http://demographicestimation.iussp.org)

<sup>5</sup> Pedersen J, Liu J. Child Mortality Estimation: Appropriate Time Periods for Child Mortality Estimates from Full Birth Histories. Plos Medicine. 2012;9(8).

<sup>6</sup> Silva R. Child Mortality Estimation: Consistency of Under-Five Mortality Rate Estimates Using Full Birth Histories and Summary Birth Histories. Plos Medicine. 2012;9(8).

die also. Child mortality estimates will thus be biased downwards. The magnitude of the bias will depend on the extent to which the elevated under-five mortality of HIV+ children is not reported because of the deaths of their mothers. A method was developed to adjust HIV/AIDS related mortality for each survey data observation from FBH during HIV/AIDS epidemics (1980-present), by adopting a set of simplified but reasonable assumptions about the distribution of births to HIV+ women, primarily relating to the duration of their infection, vertical transmission rates, and survival times of both mothers and children from the time of the birth<sup>7</sup>. This method was applied to all DHS and MICS surveys with FBH. The model was improved to incorporate the impact of antiretroviral therapies (ART) and prevention of mother to child transmission (PMTCT)<sup>8</sup>.

#### Systematic and random measurement error

Data from these different sources require different calculation methods and may suffer from different errors, for example random errors in sample surveys or systematic errors due to misreporting. As a result, different surveys often yield widely different estimates of U5MR or other mortality indicators for a given time period. In order to reconcile these differences and take better account of the systematic biases associated with the various types of data inputs, Alkema and New (2014) developed an estimation method to fit a smoothed trend curve to a set of observations and to extrapolate that trend to a defined time point, in this case 2019. This method is described in the following section.

### 1.3. Estimating levels and trends in under-5 mortality rate

#### Summary

Estimation and extrapolation of under-5 mortality rates (U5MR) was undertaken using the Bayesian B-splines bias-adjusted model, referred to as the B3 model. This model was developed, validated, and used to produce the previous round of UN IGME child mortality estimates.

In the B3 model,  $\log(\text{U5MR})$  is estimated with a flexible spline regression model. The spline regression model is fitted to all U5MR observations in the country. An observed value for U5MR is considered to be the true value for U5MR multiplied by an error factor, i.e.  $\text{observed U5MR} = \text{true U5MR} * \text{error}$ , or on the log-scale,  $\log(\text{observed u5mr}) = \log(\text{true U5MR}) + \log(\text{error})$ , where error refers to the relative difference between an observation and the truth. While estimating the true U5MR, properties of the errors that provide information about the quality of the observation, or in other words, the extent of error that we expect, are taken into account. These properties include the standard error of the observation, its source type (e.g. DHS versus census) and if the observation is part of a data series from a specific survey (and how far the data series is from other series with overlapping observation periods). These properties are summarized in the so-called data model. When estimating the U5MR, the data model adjusts for the errors in the observations, including the average systematic biases associated with different types of data sources, using information on data quality for different source types from all countries in the world.

---

<sup>7</sup> Walker N, Hill K, Zhao FM. Child Mortality Estimation: Methods Used to Adjust for Bias due to AIDS in Estimating Trends in Under-Five Mortality. *Plos Medicine*. 2012;9(8).

<sup>8</sup> Johnson P, Mizoguchi N, Pantazis A. Improved Method for Adjusting for Bias due to HIV Mortality in Estimates of Child Mortality. Paper prepared for Population Association of America Annual Meeting April 22-25, 2020. Washington, DC (forthcoming).

Figure 2 displays plots of the U5MR over time for Senegal, used here for illustrative purposes. The B3 estimates are in red. Ninety per cent uncertainty intervals for the U5MR are given by the pink bands. All data available for the country are shown as coloured points, with observations from the same data series joined by lines. Solid points and lines represent data series/observations that were included for curve-fitting. Grey bands represent the standard errors of the observations where available.

Figure 2 Illustration of the B3 model for Senegal. Left: Plot of the U5MR over time for Senegal, with the B3 estimates in red. Right: Zoomed in version of the plot on the left.

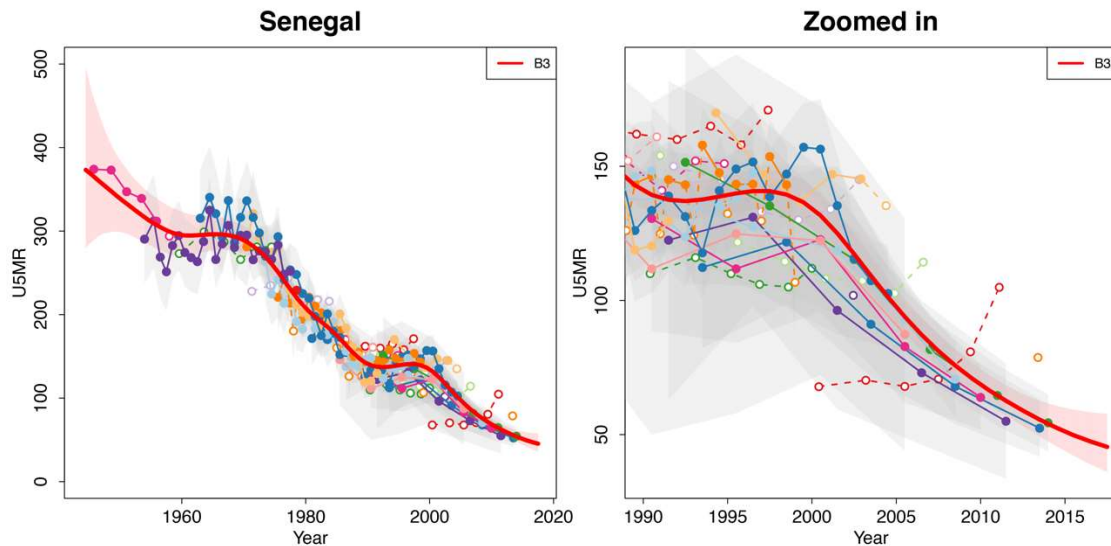

The B3 method was developed and implemented for the UN IGME by Leontine Alkema and Jin Rou New from the National University of Singapore with guidance and review by the TAG of the UN IGME. A more complete technical description of the B3 model is available elsewhere<sup>9</sup>.

### Splines regression

The splines regression fitting method for Norway is illustrated in Figure 3. Splines are smooth curves, placed 2.5 years apart, that add up to 1 at any point in time. For any year, the estimated  $\log(\text{U5MR})$  is the sum of the non-zero splines in that year multiplied by the corresponding spline coefficients (displayed by dots). For example,  $\log(\text{U5MR})$  in 1980 in Norway is given by the sum of the yellow and grey splines to the left of black line (at the year 1980) and the black and red splines to the right, multiplied by their respective spline coefficients in the same colour.

The spline coefficients determine what the resulting fitted curve looks like. When estimating the spline coefficients, we obtain a flexible yet reasonably smooth U5MR curve by assuming that the difference between two adjacent coefficients (for example for years 1981 and 1983.5) is given by the difference between the previous two coefficients (for years 1978.5 and 1981) with an estimated data-driven “distortion term” added to it. For example, in Norway during the early 1980s, these distortion terms are estimated to be around zero when U5MR did not change much, but they are negative in the late 1980s

<sup>9</sup> Alkema L, New JR. Global estimation of child mortality using a Bayesian B-spline bias-reduction method. The Annals of Applied Statistics. 2014; 8: 2122–49.

when the U5MR started to decline again. The resulting fit in Norway illustrates that the spline fit is able to follow the observed changes in the data closely.

Figure 3 Illustration of the B-splines regression model for Norway. Top row: B-splines and the estimated spline coefficients. Bottom row: Observed  $\log(U5MR)$  and U5MR (black dots) plotted against time, together with the spline estimates (red line).

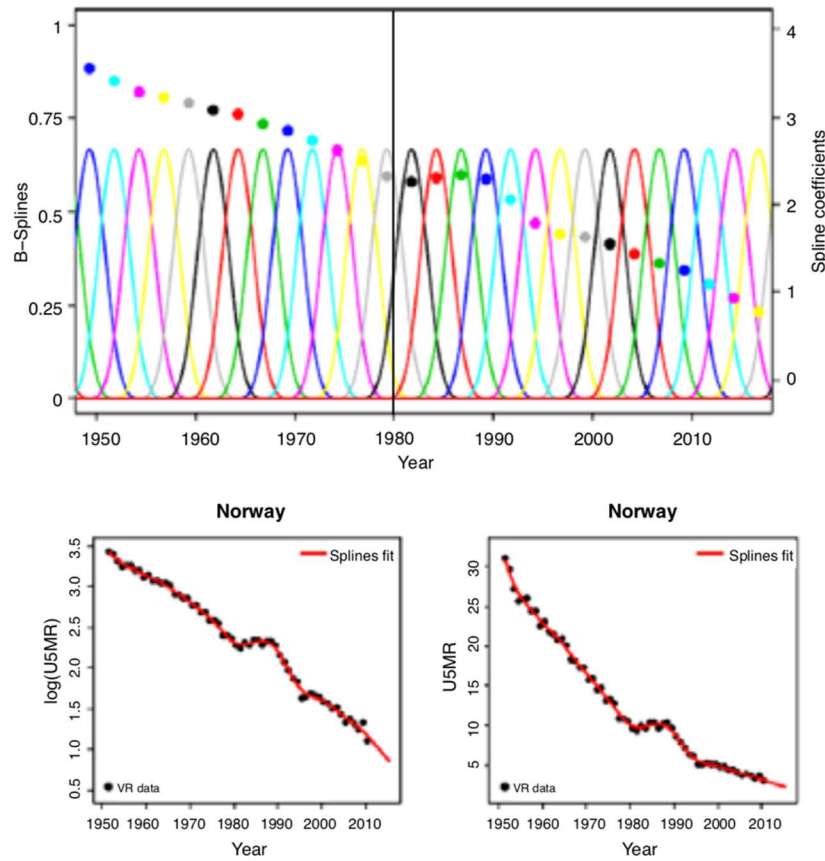

The variance of the distortion terms determines the smoothness of the fit during the observation period; large fluctuations in these distortion terms imply that the trend can vary greatly from one period to the next. The amount of smoothing is country-specific for the majority of countries. An average global level of smoothing is used for countries with a small number of live births, countries with both vital registration (VR) and non-VR data included in the fitting and countries with a gap of more than five years in their VR data.

Due to the nature of the data in such countries, a large variance for the distortion terms tends to be estimated, so a global level of smoothing helps to reduce fluctuations in the trend.

After the most recent observation period ends, country-specific U5MR is extrapolated to the target year through the estimation of “future spline coefficients”, or equivalently, by ‘projecting’ the differences between adjacent spline coefficients for the extrapolation period. The mean projected difference in spline coefficients is given by the estimated difference in the two most recent adjacent spline coefficients, and the uncertainty therein is based on the variability in the observed distortions in the

country's past. Based on out-of-sample validation exercises, this approach is shown to work well for the majority of countries but leads to unnecessarily wide uncertainty intervals (or extreme extrapolations) for a subset of countries where the most recent change in spline coefficients is very uncertain (or an extreme value). We avoid such uncertain and extreme U5MR extrapolations in longer extrapolation periods by combining the country-specific projected differences in spline coefficients with a global distribution of observed differences in the past. This final step results in the removal of very extreme country-specific U5MR extrapolations.

Figure 4 Extrapolation period (i.e. the difference in years between the most recent included data point and the common end year, 2019.5) for the UN IGME 2020 estimation round

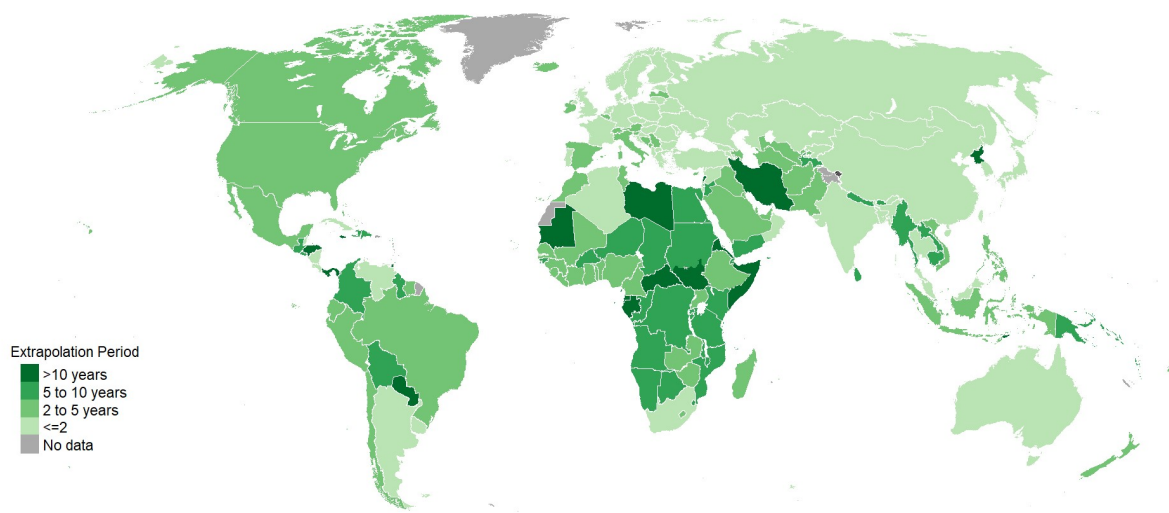

**Note:** This map does not reflect a position by UN IGME agencies or those of the institutions to which the authors are affiliated on the legal status of any country or territory or the delimitation of any frontiers.

#### Adjustment for rapidly changing child mortality driven by HIV/AIDS

To capture the extraordinarily rapid changes in child mortality driven by HIV/AIDS over the epidemic period in some countries, the regression model was fitted to data points for the U5MR from all causes other than HIV/AIDS, and then UNAIDS estimates of HIV/AIDS under-five mortality<sup>10</sup> were added to the estimates from the regression model. This method was used for 17 countries where the HIV prevalence rate exceeded 5 per cent at any point in time since 1980. Steps were as follows:

1. Compile and assess the quality of all newly available nationally representative data relevant to the estimation of child mortality.
2. Use UNAIDS estimates of HIV/AIDS child mortality<sup>10</sup> to adjust the data points from 1980 onwards to exclude HIV deaths (see section 1.2).
3. Fit the standard statistical model to the observations to HIV-free data points.
4. Extrapolate the model to the target year, in this case 2019.
5. Add back estimates of deaths due to HIV/AIDS (from UNAIDS)

<sup>10</sup> UNAIDS 1990–2018 HIV and AIDS estimates, 2019

6. For the epidemic period, a non-HIV curve of IMR is derived from U5MR using model life tables (see Section 4) and then the UNAIDS estimates of HIV/AIDS deaths for children under age 1 are added to generate the final IMR estimates.

#### 1.4. Estimating levels and trends in neonatal mortality rate

The neonatal mortality rate (NMR) is defined as the probability of dying between birth and exact age 28 days per 1000 live births. In 2015 the UN IGME method for estimating NMR was updated. The new Bayesian methodology is similar to that used to estimate U5MR and derive estimates by sex. It has the advantage that, compared to the previous model, it can capture data-driven trends in NMR within countries and over time for all countries. A more complete technical description of the model is available elsewhere<sup>11</sup>.

We model the ratio  $R(c,t)$ , which refers to the ratio of NMR to the difference of U5MR and NMR in country  $c$  and year  $t$ , i.e.  $R(c,t) = \text{NMR}/(\text{U5MR} - \text{NMR})$ . For each country-year, we assume that the ratio is given by:

$$R(c,t) = W(c,t) * P(c,t),$$

where

$W(c,t)$  refers to the expected ratio for that country-year, and

Country multiplier  $P(c,t)$  represents country-specific trends in the ratio over time that differ from the expected level.

As U5MR decreases, the proportional share of mortality in the first month of life tends to increase. The  $W(c,t)$  term accounts for this relationship; it is the expected ratio for the country-year based on the UN IGME-estimated U5MR for that country-year. It is modelled as a linear function of U5MR with a changing slope:

$$W(c,t) = \beta_0 \quad \text{if } \text{U5MR}(c,t) < \text{Ucut}$$

$$W(c,t) = \beta_0 + \beta_1 * \text{U5MR}(c,t) \quad \text{if } \text{U5MR}(c,t) \geq \text{Ucut}$$

$\text{Ucut}$  is an estimated constant that represents the level of U5MR after which as U5MR increases, the ratio  $\text{NMR}/(\text{U5MR} - \text{NMR})$  decreases. The parameters of this model are estimated based on all available data such that  $W(c,t)$  represents a 'global relation' between the ratio and U5MR.

The country multiplier  $P(c,t)$  is modelled with a B-splines regression model. The  $P(c,t)$  represents a country-specific intercept, which is modelled hierarchically, and fluctuations around that intercept over time. For any particular country, the ratio can overall be higher- or lower-than-expected given the level of U5MR in that country, but the fluctuations allow this relationship to change over time within a country. A degree of smoothness is imposed on the fluctuations to ensure relatively smooth trajectories for any given country through time. We model the ratio of  $\text{NMR}/(\text{U5MR} - \text{NMR})$ ; estimates of NMR are obtained by recombining the estimates of the ratio with UN IGME-estimated U5MR.

---

<sup>11</sup> Alexander, M. & Alkema, L. Global Estimation of Neonatal Mortality using a Bayesian Hierarchical Splines Regression Model Demographic Research, 2018, 38, 335-372.



For neonatal mortality in HIV-affected and crisis-affected populations, the ratio is estimated initially for non-AIDS and non-crisis mortality. After estimation, crisis neonatal deaths are added back on to the neonatal deaths to compute the total estimated neonatal mortality rate. No AIDS deaths are added back to the NMR, thereby assuming that HIV/AIDS-related deaths only affect child mortality after the first month of life.

#### 1.5. Calculating number of deaths

A birth-week cohort method is used to calculate the absolute number of deaths among neonates, infants, and children under age 5. First, each annual birth cohort is divided into 52 equal birth-week cohorts. Then, each birth-week cohort is exposed throughout the first five years of life to the appropriate calendar year- and age-specific mortality rates depending on cohort age, assuming that mortality rates are constant over the age intervals. For example, the 20th birth week cohort of the year 2000 will be exposed to the infant mortality rates in both 2000 and 2001. All deaths from birth-week cohorts occurring as a result of exposure to the mortality rate for a given calendar year are allocated to that year and are summed by age group at death to get the total number of deaths for a given year and age group. Continuing with the above example, deaths from the 20th birth-week cohort of the year 2000 would contribute to infant deaths in year 2000 and 2001. Any deaths occurring among the 20th birth-week cohort of year 2000 after the 20th week in 2001 would contribute to under-5 deaths for year 2001 and so forth. Under-five deaths in each calendar year are calculated by summing up all the deaths under age five across all age group cohorts in that year. The annual estimate of the number of live births in each country from the World Population Prospects: the 2019 revision<sup>12</sup> are used to calculate the numbers of deaths.

#### 1.6. Child mortality due to conflict and environmental disasters

Estimated deaths for major crises including conflicts, environmental disasters (e.g. floods, earthquakes, cyclones), and epidemics were derived from various data sources from 1990 to present. Data on all-age deaths from environmental disasters were obtained from the CRED International Disaster Database<sup>13</sup> and the proportions of deaths occurring under age 5 and under age 1 were estimated using disaster-type specific age patterns described elsewhere<sup>14</sup>. Conflict deaths were obtained from the Uppsala Conflict Data Program/Peace Research Institute Oslo datasets as well as reports prepared by the UN and other organizations on specific conflicts, again using age patterns to estimate the proportions of under-five and under-one deaths. We calculate a crisis-U5MR and crisis-IMR from these age-specific crisis deaths.

---

<sup>12</sup> United Nations Department of Economic and Social Affairs Population Division. World Population Prospects - the 2019 revision. New York: United Nations, 2019.

<sup>13</sup> CRED. EM-DAT: The CRED International Disaster Database. Belgium: Université Catholique de Louvain. (available from: <http://www.emdat.be/>)

<sup>14</sup> World Health Organization. WHO methods and data sources for country-level causes of death 2000-2017. Global Health Estimates Technical Paper WHO/HMM/IER/GHE/2018.4. Geneva: WHO, 2018. (available from: <[www.who.int/healthinfo/global\\_burden\\_disease/childcod\\_methods\\_2000\\_2017.pdf](http://www.who.int/healthinfo/global_burden_disease/childcod_methods_2000_2017.pdf)>).



Estimated child deaths due to major crises were used to adjust mortality rates in specific country-years if the crisis met the following criteria:

1. The crisis was isolated to a few years
2. Under-five crisis deaths were more than 10% of under-five non-crisis deaths in the given year
3. Crisis U5MR was more than 0.2 per 1,000 in the given year
4. Number of under-five crisis deaths was greater than 10.

These criteria resulted in crisis adjustments being incorporated into the UN IGME under-five mortality estimates for 22 countries. Crisis deaths were incorporated into the U5MR estimates by first excluding any data points from crisis years, fitting the B3 model to the remaining data, and then adding the crisis-specific death rate to the fitted crisis-free B3 curve. For countries where IMR is derived from U5MR, the crisis-free U5MR trajectories are used to derive a crisis-free IMR to which infant crisis adjustments are applied. The procedure produces a smooth crisis-free fit in all non-crisis years, while also including acute spikes related to specific crises.

Crisis death estimates are uncertain but presently no uncertainty around crisis deaths is included in the U5MR uncertainty intervals. We assume the relative uncertainty in the adjusted U5MR is equal to the relative uncertainty in the non-adjusted U5MR; this assumption will be revisited in the near future. The UN IGME has assessed recent, ongoing crises, and based on the lack of currently available data and the difficulties of estimating the broader impact of these crises on health systems, UN IGME holds the mortality rate estimates constant from the start of the crisis while increasing the uncertainty over the crisis time for three countries: South Sudan, Venezuela (Bolivarian Republic of) and Yemen. Where applicable, direct crisis deaths have been added to the constant trend estimate. UN IGME will review new data, if available, in the next estimation round and revise estimates accordingly.

## 2. Regional Classifications

Estimates at the regional level in the paper were based on the following classifications. The paper makes use of both UNICEF regional classifications and World Bank income classifications.

### 2.1. UNICEF classifications

#### **East Asia and Pacific**

Australia; Brunei Darussalam; Cambodia; China; Cook Islands; Democratic People's Republic of Korea; Fiji; Indonesia; Japan; Kiribati; Lao People's Democratic Republic; Malaysia; Marshall Islands; Micronesia (Federated States of); Mongolia; Myanmar; Nauru; New Zealand; Niue; Palau; Papua New Guinea; Philippines; Republic of Korea; Samoa; Singapore; Solomon Islands; Thailand; Timor-Leste; Tonga; Tuvalu; Vanuatu; Viet Nam

#### **Europe and Central Asia**

Eastern Europe and Central Asia; Western Europe

#### **Eastern Europe and Central Asia**

Albania; Armenia; Azerbaijan; Belarus; Bosnia and Herzegovina; Bulgaria; Croatia; Georgia; Kazakhstan; Kyrgyzstan; Montenegro; Republic of Moldova; Northern Macedonia; Romania; Russian Federation; Serbia; Tajikistan; Turkey; Turkmenistan; Ukraine; Uzbekistan

#### **Western Europe**

Andorra; Austria; Belgium; Cyprus; Czechia; Denmark; Estonia; Finland; France; Germany; Greece; Hungary; Iceland; Ireland; Italy; Latvia; Lithuania; Luxembourg; Malta; Monaco; Netherlands; Norway; Poland; Portugal; San Marino; Slovakia; Slovenia; Spain; Sweden; Switzerland; United Kingdom

#### **Latin America and Caribbean**

Antigua and Barbuda; Argentina; Bahamas; Barbados; Belize; Bolivia (Plurinational State of); Brazil; Chile; Colombia; Costa Rica; Cuba; Dominica; Dominican Republic; Ecuador; El Salvador; Grenada; Guatemala; Guyana; Haiti; Honduras; Jamaica; Mexico; Nicaragua; Panama; Paraguay; Peru; Saint Kitts and Nevis; Saint Lucia; Saint Vincent and the Grenadines; Suriname; Trinidad and Tobago; Uruguay; Venezuela (Bolivarian Republic of)

#### **Middle East and North Africa**

Algeria; Bahrain; Egypt; Iran (Islamic Republic of); Iraq; Israel; Jordan; Kuwait; Lebanon; Libya; Morocco; Oman; Qatar; Saudi Arabia; State of Palestine; Syrian Arab Republic; Tunisia; United Arab Emirates; Yemen

#### **North America**

Canada; United States of America

#### **South Asia**

Afghanistan; Bangladesh; Bhutan; India; Maldives; Nepal; Pakistan; Sri Lanka

#### **Sub-Saharan Africa**

Eastern and Southern Africa; West and Central Africa

### **Eastern and Southern Africa**

Angola; Botswana; Burundi; Comoros; Djibouti; Eritrea; Eswatini; Ethiopia; Kenya; Lesotho; Madagascar; Malawi; Mauritius; Mozambique; Namibia; Rwanda; Seychelles; Somalia; South Africa; South Sudan; Sudan; Uganda; United Republic of Tanzania; Zambia; Zimbabwe

### **West and Central Africa**

Benin; Burkina Faso; Cabo Verde; Cameroon; Central African Republic; Chad; Congo; Côte d'Ivoire; Democratic Republic of the Congo; Equatorial Guinea; Gabon; Gambia; Ghana; Guinea; Guinea-Bissau; Liberia; Mali; Mauritania; Niger; Nigeria; Sao Tome and Principe; Senegal; Sierra Leone; Togo

**Map A1: UNICEF regional classifications.**

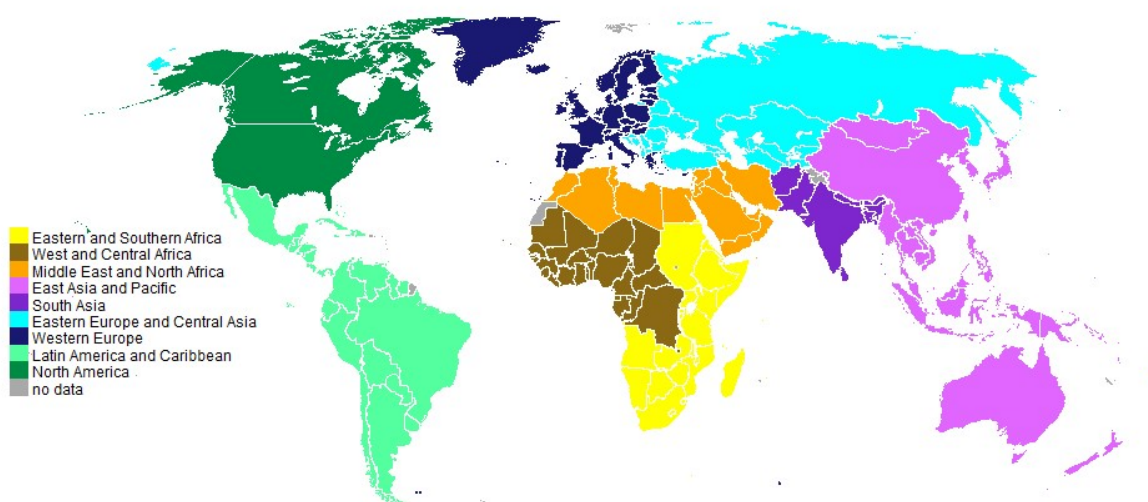

**Note:** This map does not reflect a position by UN IGME agencies or those of the institutions to which the authors are affiliated on the legal status of any country or territory or the delimitation of any frontiers.

## 2.2. World Bank classifications

### **Low income**

Afghanistan; Burkina Faso; Burundi; Central African Republic; Chad; Democratic People's Republic of Korea; Democratic Republic of the Congo; Eritrea; Ethiopia; Gambia; Guinea; Guinea-Bissau; Haiti; Liberia; Madagascar; Malawi; Mali; Mozambique; Niger; Rwanda; Sierra Leone; Somalia; South Sudan; Sudan; Syrian Arab Republic; Tajikistan; Togo; Uganda; Yemen

### **Lower middle income**

Algeria; Angola; Bangladesh; Benin; Bhutan; Bolivia (Plurinational State of); Cabo Verde; Cambodia; Cameroon; Comoros; Congo; Cote d'Ivoire; Djibouti; Egypt; El Salvador; Eswatini; Ghana; Honduras; India; Kenya; Kiribati; Kyrgyzstan; Lao People's Democratic Republic; Lesotho; Mauritania; Micronesia (Federated States of); Mongolia; Morocco; Myanmar; Nepal; Nicaragua; Nigeria; Pakistan; Papua New Guinea; Philippines; Republic of Moldova; Sao Tome and Principe; Senegal; Solomon Islands; Sri Lanka; State of Palestine; Timor-Leste; Tunisia; Ukraine; United Republic of Tanzania; Uzbekistan; Vanuatu; Viet Nam; Zambia; Zimbabwe

### **Upper middle income**

Albania; Argentina; Armenia; Azerbaijan; Belarus; Belize; Bosnia and Herzegovina; Botswana; Brazil; Bulgaria; China; Colombia; Costa Rica; Cuba; Dominica; Dominican Republic; Ecuador; Equatorial Guinea; Fiji; Gabon; Georgia; Grenada; Guatemala; Guyana; Indonesia; Iran (Islamic Republic of); Iraq; Jamaica; Jordan; Kazakhstan; Lebanon; Libya; Malaysia; Maldives; Marshall Islands; Mexico; Montenegro; Namibia; Paraguay; Peru; Republic of North Macedonia; Russian Federation; Saint Lucia; Saint Vincent and the Grenadines; Samoa; Serbia; South Africa; Suriname; Thailand; Tonga; Turkey; Turkmenistan; Tuvalu; Venezuela (Bolivarian Republic of)

**High income**

Andorra; Antigua and Barbuda; Australia; Austria; Bahamas; Bahrain; Barbados; Belgium; Brunei Darussalam; Canada; Chile; Croatia; Cyprus; Czechia; Denmark; Estonia; Finland; France; Germany; Greece; Hungary; Iceland; Ireland; Israel; Italy; Japan; Kuwait; Latvia; Liechtenstein; Lithuania; Luxembourg; Malta; Mauritius; Monaco; Nauru; Netherlands; New Zealand; Norway; Oman; Palau; Panama; Poland; Portugal; Qatar; Republic of Korea; Romania; Saint Kitts and Nevis; San Marino; Saudi Arabia; Seychelles; Singapore; Slovakia; Slovenia; Spain; Sweden; Switzerland; Trinidad and Tobago; United Arab Emirates; United Kingdom; United States of America; Uruguay

### 3. Supplementary tables

#### 3.1. Table A.1 Levels and trends in U5MR, by country, 1990-2019

Note: Numbers in brackets are 90% uncertainty intervals.

|                                  | Under-five mortality rate<br>(per 1,000 live births) |                        |                        |                      | Average annual rate of reduction in<br>under-five mortality rate (%) |                    |                    |
|----------------------------------|------------------------------------------------------|------------------------|------------------------|----------------------|----------------------------------------------------------------------|--------------------|--------------------|
|                                  | 1990                                                 | 2000                   | 2010                   | 2019                 | 1990-1999                                                            | 2000-2009          | 2010-2019          |
| Afghanistan                      | 177.7<br>(162.5-194.3)                               | 128.7<br>(119.6-138.9) | 87.6<br>(80.3-95.8)    | 60.3<br>(47.4-74.6)  | 3.2<br>(2.4-4)                                                       | 3.8<br>(3-4.6)     | 4.2<br>(2.2-6.4)   |
| Albania                          | 41<br>(36.4-46.1)                                    | 27.2<br>(24.8-29.9)    | 13.2<br>(12.8-13.7)    | 9.7<br>(9.1-10.3)    | 4<br>(2.7-5.4)                                                       | 7<br>(5.9-8.2)     | 3.5<br>(2.6-4.3)   |
| Algeria                          | 49.5<br>(46.1-52.9)                                  | 39.7<br>(38.8-40.6)    | 27.4<br>(26.9-28)      | 23.3<br>(22.5-24)    | 2.3<br>(1.5-3.1)                                                     | 3.7<br>(3.4-4)     | 1.8<br>(1.4-2.3)   |
| Andorra                          | 13<br>(3.3-50.4)                                     | 7.7<br>(3.8-15.3)      | 4.6<br>(2.2-9.6)       | 3<br>(0.8-11)        | 5.3<br>(-4.1-14.8)                                                   | 5.1<br>(-3.6-13.4) | 4.9<br>(-3.4-12.8) |
| Angola                           | 222.2<br>(196.8-251.3)                               | 203.9<br>(178.6-233.7) | 120.3<br>(83.3-166.8)  | 74.7<br>(34.6-139.3) | 0.7<br>(-0.6-1.9)                                                    | 5.1<br>(2-8.7)     | 5.3<br>(0.9-11)    |
| Antigua and Barbuda              | 14<br>(12.4-15.8)                                    | 15.5<br>(13.9-17.1)    | 10<br>(8.8-11.4)       | 6.6<br>(4.6-9.3)     | -1.3<br>(-2.9-0.3)                                                   | 4.2<br>(2.6-5.8)   | 4.6<br>(1-8.4)     |
| Argentina                        | 28.6<br>(28.1-29.2)                                  | 19.6<br>(19.3-20)      | 14.4<br>(14.2-14.7)    | 9.3<br>(8.8-9.8)     | 3.8<br>(3.5-4.1)                                                     | 3<br>(2.7-3.3)     | 4.9<br>(4.3-5.5)   |
| Armenia                          | 48.9<br>(44.4-53.9)                                  | 30.7<br>(27.6-33.8)    | 18.5<br>(15.6-21.2)    | 11.8<br>(8.8-15.2)   | 4.6<br>(3.9-5.5)                                                     | 5<br>(3.8-6.5)     | 5<br>(2.9-7.3)     |
| Australia                        | 9.2<br>(9-9.4)                                       | 6.2<br>(6.1-6.3)       | 4.8<br>(4.7-4.9)       | 3.6<br>(3.4-3.8)     | 4.2<br>(3.9-4.5)                                                     | 2.4<br>(2.1-2.7)   | 3.1<br>(2.5-3.8)   |
| Austria                          | 9.5<br>(9.3-9.8)                                     | 5.5<br>(5.3-5.7)       | 4.3<br>(4.2-4.5)       | 3.5<br>(3-4)         | 5.9<br>(5.4-6.4)                                                     | 2.4<br>(1.8-3)     | 2.5<br>(0.7-4.2)   |
| Azerbaijan                       | 95.2<br>(86.2-105.1)                                 | 74.6<br>(66.5-83.7)    | 37.4<br>(30.9-45.3)    | 20.4<br>(13.1-31.9)  | 2<br>(0.7-3.1)                                                       | 6.9<br>(4.9-9)     | 6.7<br>(2.1-11.4)  |
| Bahamas                          | 23.5<br>(22.3-24.7)                                  | 16.3<br>(15.3-17.3)    | 15.6<br>(14.6-16.6)    | 12.6<br>(9.8-16)     | 4<br>(3.2-4.9)                                                       | 0.3<br>(-0.7-1.2)  | 2.3<br>(-0.4-5.2)  |
| Bahrain                          | 23<br>(22.2-23.8)                                    | 12.5<br>(11.9-13.1)    | 8.5<br>(8.1-9)         | 6.9<br>(5.5-8.8)     | 6.2<br>(5.5-6.8)                                                     | 3.8<br>(3-4.5)     | 2.3<br>(-0.5-5)    |
| Bangladesh                       | 143.8<br>(139.6-148.1)                               | 86.5<br>(83.7-89.3)    | 48.7<br>(46.8-50.6)    | 30.8<br>(27.9-33.8)  | 5<br>(4.6-5.4)                                                       | 5.8<br>(5.3-6.2)   | 5.1<br>(4-6.2)     |
| Barbados                         | 18.1<br>(17-19.3)                                    | 15.1<br>(14.1-16.3)    | 15<br>(13.8-16.3)      | 12.7<br>(9-17.6)     | 2.1<br>(1.1-3.1)                                                     | 0<br>(-1.2-1.2)    | 1.9<br>(-1.6-5.5)  |
| Belarus                          | 15.2<br>(14.9-15.5)                                  | 12.7<br>(12.5-13)      | 5.5<br>(5.3-5.7)       | 3.2<br>(2.9-3.6)     | 1.2<br>(0.8-1.5)                                                     | 8.4<br>(8-8.8)     | 6<br>(4.8-7.1)     |
| Belgium                          | 10<br>(9.8-10.2)                                     | 5.8<br>(5.6-6)         | 4.5<br>(4.3-4.6)       | 3.4<br>(2.9-4)       | 5.6<br>(5.2-6)                                                       | 2.7<br>(2.2-3.2)   | 3<br>(1.3-4.8)     |
| Belize                           | 38.3<br>(33.7-43.5)                                  | 23.6<br>(22.1-25.1)    | 18.9<br>(18-19.9)      | 12.3<br>(10.7-14.3)  | 5<br>(3.7-6.2)                                                       | 2.2<br>(1.2-3.1)   | 4.8<br>(3-6.5)     |
| Benin                            | 175.1<br>(164.8-186.4)                               | 138.8<br>(130.4-148.1) | 110.8<br>(102.2-120.4) | 90.3<br>(77.4-104.8) | 2.3<br>(1.9-2.8)                                                     | 2.3<br>(1.7-2.9)   | 2.3<br>(1-3.6)     |
| Bhutan                           | 127<br>(112.4-146.1)                                 | 77.1<br>(69.6-86.1)    | 42.2<br>(34.9-50.3)    | 28.5<br>(18.2-43.7)  | 4.9<br>(3.8-6.1)                                                     | 6<br>(4.4-8)       | 4.4<br>(0.4-8.4)   |
| Bolivia (Plurinational State of) | 121.5<br>(115-128.4)                                 | 75.5<br>(70.9-80.5)    | 41.3<br>(36.7-46.4)    | 26<br>(19.6-34.1)    | 4.6<br>(4.1-5.2)                                                     | 6<br>(5-7.1)       | 5.2<br>(2.7-7.7)   |
| Bosnia and Herzegovina           | 18.1<br>(17.7-18.6)                                  | 9.9<br>(9.6-10.3)      | 7.2<br>(6.9-7.5)       | 5.9<br>(4.9-6.9)     | 6.2<br>(5.8-6.7)                                                     | 3<br>(2.4-3.6)     | 2.3<br>(0.3-4.3)   |
| Botswana                         | 48.4<br>(40.7-57.9)                                  | 69.3<br>(55.8-95.9)    | 35.1<br>(20.3-58.9)    | 41.6<br>(15.1-87.2)  | -4.2<br>(-7.6-1.6)                                                   | 7.4<br>(2.3-13.2)  | -1.9<br>(-9.9-8.4) |
| Brazil                           | 62.9<br>(58.6-67.4)                                  | 34.6<br>(32.4-37.1)    | 18.7<br>(18.2-19.2)    | 13.9<br>(11.7-16.5)  | 5.9<br>(5.1-6.7)                                                     | 6.3<br>(5.6-7.1)   | 3.3<br>(1.3-5.3)   |
| Brunei Darussalam                | 13.3<br>(12.5-14.1)                                  | 10.3<br>(9.7-11)       | 9.7<br>(9-10.4)        | 11.4<br>(10.1-12.9)  | 2.4<br>(1.5-3.4)                                                     | 0.8<br>(-0.2-1.9)  | -1.8<br>(-3.5-0.2) |
| Bulgaria                         | 18.4<br>(18-18.9)                                    | 17.4<br>(16.9-17.9)    | 10.9<br>(10.5-11.2)    | 6.7<br>(6.3-7.2)     | 0.1<br>(-0.3-0.5)                                                    | 5<br>(4.5-5.4)     | 5.3<br>(4.5-6.1)   |

|                                       | Under-five mortality rate<br>(per 1,000 live births) |                        |                        |                       | Average annual rate of reduction in<br>under-five mortality rate (%) |                    |                    |
|---------------------------------------|------------------------------------------------------|------------------------|------------------------|-----------------------|----------------------------------------------------------------------|--------------------|--------------------|
|                                       | 1990                                                 | 2000                   | 2010                   | 2019                  | 1990-1999                                                            | 2000-2009          | 2010-2019          |
| Burkina Faso                          | 198.5<br>(185.9-212.1)                               | 179.2<br>(166.9-192)   | 121.7<br>(109.4-134.9) | 87.5<br>(63.9-120.9)  | 0.9<br>(0.3-1.5)                                                     | 3.8<br>(3-4.6)     | 3.7<br>(0.4-6.7)   |
| Burundi                               | 174.3<br>(158.7-191.9)                               | 155.2<br>(141.3-170.9) | 90.6<br>(78.6-104)     | 56.5<br>(37.3-84.8)   | 0.9<br>(-0.2-2)                                                      | 5.3<br>(3.8-6.7)   | 5.3<br>(1.1-9.4)   |
| Cabo Verde                            | 60.5<br>(58.3-62.7)                                  | 38.1<br>(37-39.3)      | 26.3<br>(25.2-27.3)    | 14.9<br>(12.3-18)     | 4<br>(3.4-4.5)                                                       | 3.8<br>(3.3-4.4)   | 6.3<br>(4.1-8.5)   |
| Cambodia                              | 115.9<br>(107.4-125.4)                               | 106.3<br>(97.6-115.9)  | 44<br>(37-52.4)        | 26.6<br>(14-50.3)     | 0.2<br>(-0.6-1)                                                      | 8.9<br>(7.2-10.7)  | 5.6<br>(-1-12.3)   |
| Cameroon                              | 135.7<br>(126.5-145.5)                               | 143.4<br>(133.1-154.6) | 110.1<br>(100.3-120.7) | 74.8<br>(61.6-89.9)   | -0.8<br>(-1.6-0)                                                     | 2.5<br>(1.7-3.4)   | 4.3<br>(2.4-6.3)   |
| Canada                                | 8.2<br>(8.1-8.4)                                     | 6.2<br>(6.1-6.3)       | 5.6<br>(5.5-5.7)       | 4.9<br>(4.5-5.2)      | 3<br>(2.8-3.4)                                                       | 0.9<br>(0.6-1.2)   | 1.7<br>(0.9-2.5)   |
| Central African Republic              | 176.8<br>(158.2-198.1)                               | 169.8<br>(151-190.4)   | 147.6<br>(114.7-192.5) | 110.1<br>(63.9-189.4) | 0.4<br>(-0.8-1.6)                                                    | 1.3<br>(-1.1-3.4)  | 3.3<br>(-1.3-8)    |
| Chad                                  | 212.1<br>(196.7-228.8)                               | 185.1<br>(171.5-200.6) | 148.6<br>(133.7-165.4) | 113.8<br>(86.4-150.4) | 1.3<br>(0.6-1.9)                                                     | 2.1<br>(1.3-3.1)   | 3<br>(0.3-5.6)     |
| Chile                                 | 19.1<br>(18.7-19.5)                                  | 10.9<br>(10.7-11.1)    | 8.7<br>(8.5-8.9)       | 7<br>(5.3-9)          | 5.6<br>(5.2-6)                                                       | 2.3<br>(2-2.7)     | 2.5<br>(-0.4-5.4)  |
| China                                 | 53.8<br>(49.4-58.6)                                  | 36.8<br>(34.7-39.1)    | 15.8<br>(14.9-16.7)    | 7.9<br>(6.9-9.1)      | 3.5<br>(2.4-4.7)                                                     | 8.5<br>(7.6-9.5)   | 7.7<br>(5.9-9.4)   |
| Colombia                              | 35.1<br>(32.6-37.6)                                  | 24.9<br>(22.9-26.9)    | 18.4<br>(16.1-21)      | 13.8<br>(9.7-19.4)    | 3.4<br>(2.7-4.2)                                                     | 3<br>(1.7-4.2)     | 3.2<br>(0-6.5)     |
| Comoros                               | 124.4<br>(109.9-139.3)                               | 100.4<br>(80.8-118.4)  | 84.4<br>(53.3-138.2)   | 62.9<br>(30.6-134.2)  | 2.3<br>(0.5-4.4)                                                     | 1.6<br>(-3.3-5.1)  | 3.3<br>(-1.9-8.4)  |
| Congo                                 | 90.4<br>(79.3-102.7)                                 | 114<br>(102.5-126.7)   | 62.2<br>(53.6-71.9)    | 47.8<br>(28.5-82.7)   | -2.7<br>(-4.1-1.3)                                                   | 6.3<br>(4.6-7.9)   | 2.9<br>(-2.8-8.1)  |
| Cook Islands                          | 24<br>(21.7-26.7)                                    | 18<br>(16-20.1)        | 10.7<br>(8.3-13.8)     | 7.6<br>(4.5-12.9)     | 2.7<br>(1.4-4)                                                       | 5.2<br>(3-7.4)     | 3.8<br>(-0.8-8.3)  |
| Costa Rica                            | 16.9<br>(16.5-17.2)                                  | 13.1<br>(12.8-13.4)    | 10.5<br>(10.2-10.8)    | 8.6<br>(8.2-9.1)      | 2.4<br>(2.1-2.7)                                                     | 2.2<br>(1.8-2.6)   | 2.2<br>(1.6-2.8)   |
| Cote d'Ivoire                         | 152.3<br>(142-163.2)                                 | 142.3<br>(132.2-153.3) | 106.4<br>(96.2-117.3)  | 79.3<br>(63.1-99.6)   | 0.5<br>(-0.2-1.3)                                                    | 2.9<br>(2-3.7)     | 3.3<br>(1.1-5.4)   |
| Croatia                               | 12.8<br>(12.4-13.2)                                  | 8.3<br>(8.1-8.6)       | 5.5<br>(5.2-5.7)       | 4.8<br>(4.3-5.3)      | 4.4<br>(3.9-4.9)                                                     | 4.3<br>(3.7-4.9)   | 1.5<br>(0-2.7)     |
| Cuba                                  | 13.5<br>(12.4-14.6)                                  | 8.8<br>(8-9.5)         | 6.3<br>(5.8-6.9)       | 5.1<br>(4.4-6.1)      | 4.4<br>(3.5-5.3)                                                     | 3.4<br>(2.4-4.3)   | 2.3<br>(0.3-3.9)   |
| Cyprus                                | 11.2<br>(10.6-12)                                    | 6.6<br>(6.1-7.1)       | 3.5<br>(3.2-4)         | 2.3<br>(1.6-3.4)      | 5.2<br>(4.2-6.4)                                                     | 6.2<br>(4.7-7.8)   | 4.8<br>(0.2-8.8)   |
| Czechia                               | 12.2<br>(11.9-12.4)                                  | 5.5<br>(5.3-5.7)       | 3.4<br>(3.3-3.5)       | 3.2<br>(3-3.4)        | 8.1<br>(7.7-8.6)                                                     | 4.9<br>(4.3-5.4)   | 0.7<br>(-0.1-1.6)  |
| Democratic People's Republic of Korea | 43.4<br>(34-55.6)                                    | 60<br>(47-76.9)        | 29.5<br>(23.1-37.8)    | 17.3<br>(13.6-22.2)   | -4.9<br>(-4.9-4.9)                                                   | 7.3<br>(7.4-7.4)   | 5.9<br>(5.9-5.9)   |
| Democratic Republic of the Congo      | 185.4<br>(167-204.7)                                 | 159.5<br>(144.7-176.8) | 114.8<br>(95.1-136.1)  | 84.8<br>(54.3-128.7)  | 1.4<br>(0.3-2.4)                                                     | 3.3<br>(1.7-5.1)   | 3.4<br>(-0.6-7.3)  |
| Denmark                               | 9<br>(8.7-9.3)                                       | 5.7<br>(5.5-5.9)       | 4.1<br>(3.9-4.3)       | 3.8<br>(3.5-4.1)      | 4.9<br>(4.3-5.4)                                                     | 3.4<br>(2.7-4.1)   | 1<br>(-0.1-2)      |
| Djibouti                              | 117.9<br>(101.1-137.4)                               | 101.1<br>(86.6-119.4)  | 76.4<br>(59.6-97.5)    | 57.5<br>(33.9-93.8)   | 1.5<br>(-0.7-3.1)                                                    | 2.8<br>(0.5-5.5)   | 3.2<br>(-1.1-7.5)  |
| Dominica                              | 16.5<br>(15.4-17.6)                                  | 17<br>(15.8-18.2)      | 24.5<br>(22.5-26.7)    | 34.7<br>(31.6-42.4)   | -0.1<br>(-0.6-0.4)                                                   | -3.5<br>(-4.2-2.8) | -3.9<br>(-5.6-3.4) |
| Dominican Republic                    | 60<br>(56.3-64)                                      | 40.7<br>(37.5-44)      | 34.1<br>(29.4-39.6)    | 28<br>(19.4-40.7)     | 4<br>(3.2-4.8)                                                       | 1.8<br>(0.3-3.3)   | 2.2<br>(-1.2-5.5)  |
| Ecuador                               | 53.6<br>(48.5-59.2)                                  | 28.9<br>(25.7-32.5)    | 18.3<br>(16.1-20.8)    | 14<br>(12.7-15.3)     | 6.2<br>(5-7.3)                                                       | 4.6<br>(3.3-5.9)   | 3<br>(0.9-5.1)     |
| Egypt                                 | 85.5<br>(81.5-89.9)                                  | 46.6<br>(43.6-49.6)    | 28.8<br>(25.6-32.5)    | 20.3<br>(14.3-29.1)   | 6<br>(5.4-6.7)                                                       | 4.9<br>(3.7-6)     | 3.9<br>(0.4-7.4)   |
| El Salvador                           | 59.6<br>(54.5-65)                                    | 32.8<br>(29.5-36.3)    | 19.2<br>(15.5-23.6)    | 13.3<br>(8.5-20.8)    | 6<br>(5-7.1)                                                         | 5.4<br>(3.5-7.2)   | 4.1<br>(0.3-7.8)   |

|                            | Under-five mortality rate<br>(per 1,000 live births) |                        |                        |                      | Average annual rate of reduction in<br>under-five mortality rate (%) |                    |                     |
|----------------------------|------------------------------------------------------|------------------------|------------------------|----------------------|----------------------------------------------------------------------|--------------------|---------------------|
|                            | 1990                                                 | 2000                   | 2010                   | 2019                 | 1990-1999                                                            | 2000-2009          | 2010-2019           |
| Equatorial Guinea          | 177.7<br>(156.7-200.6)                               | 156.3<br>(139.7-178.3) | 111.7<br>(88.1-139.2)  | 81.8<br>(49.1-134.6) | 1.1<br>(-0.6-2.6)                                                    | 3.3<br>(1.3-5.8)   | 3.5<br>(-1-8)       |
| Eritrea                    | 152.7<br>(140.3-166.6)                               | 85.4<br>(78.1-93.1)    | 55.2<br>(46.3-65.8)    | 40.5<br>(24.5-67)    | 5.9<br>(5.1-6.7)                                                     | 4.4<br>(3-5.8)     | 3.5<br>(-1.3-8.2)   |
| Estonia                    | 17.7<br>(17-18.3)                                    | 10.9<br>(10.4-11.5)    | 4.6<br>(4.3-4.9)       | 2.4<br>(2-2.8)       | 4.4<br>(3.7-5.1)                                                     | 8.7<br>(7.8-9.7)   | 7.2<br>(5.1-9.1)    |
| Eswatini                   | 67.4<br>(59.7-75.6)                                  | 109.7<br>(99.2-121.2)  | 86.6<br>(73.9-101.4)   | 49.4<br>(32.7-74.2)  | -5<br>(-6.2-3.8)                                                     | 1.4<br>(-0.2-2.9)  | 6.3<br>(2.5-10.1)   |
| Ethiopia                   | 199.9<br>(185.9-215.2)                               | 140.3<br>(130.9-150.7) | 82<br>(75.4-89.2)      | 50.7<br>(41.6-61.7)  | 3.5<br>(2.9-4)                                                       | 5.4<br>(4.6-6.2)   | 5.3<br>(3.3-7.3)    |
| Fiji                       | 28.9<br>(24.5-34.1)                                  | 22.7<br>(21.6-23.8)    | 23.7<br>(22.8-24.6)    | 25.7<br>(23-28.8)    | 2.5<br>(0.9-4.1)                                                     | -0.5<br>(-1.2-0.2) | -0.9<br>(-2.3-0.4)  |
| Finland                    | 6.7<br>(6.5-7)                                       | 4.3<br>(4.1-4.5)       | 3<br>(2.9-3.2)         | 2.4<br>(2.2-2.6)     | 4.7<br>(4.1-5.4)                                                     | 3.4<br>(2.7-4.1)   | 2.6<br>(1.3-3.8)    |
| France                     | 9<br>(8.8-9.2)                                       | 5.4<br>(5.3-5.5)       | 4.3<br>(4.2-4.4)       | 4.5<br>(4.2-4.7)     | 5.5<br>(5.1-5.8)                                                     | 2.5<br>(2.1-2.8)   | -0.5<br>(-1.1-0.1)  |
| Gabon                      | 91.7<br>(78.7-106.5)                                 | 84<br>(72.5-98.8)      | 61.6<br>(50.2-74.4)    | 42.5<br>(26.6-67.8)  | 0.8<br>(-0.7-2)                                                      | 3<br>(1.1-5.4)     | 4.1<br>(-0.2-8.3)   |
| Gambia                     | 167.4<br>(150.7-186.4)                               | 112.5<br>(102.4-123.7) | 72.9<br>(65-81.4)      | 51.7<br>(43.3-61.4)  | 3.9<br>(3-4.9)                                                       | 4.4<br>(3.4-5.5)   | 3.8<br>(2.2-5.4)    |
| Georgia                    | 47.7<br>(42.9-53.3)                                  | 36.6<br>(32.3-42.1)    | 14.2<br>(13.3-15.2)    | 9.6<br>(8.2-11.3)    | 2.3<br>(0.8-3.7)                                                     | 9.5<br>(7.9-11.2)  | 4.3<br>(2.3-6.4)    |
| Germany                    | 8.5<br>(8.4-8.7)                                     | 5.4<br>(5.3-5.5)       | 4.2<br>(4.1-4.2)       | 3.8<br>(3.6-4)       | 4.8<br>(4.6-5.1)                                                     | 2.5<br>(2.3-2.8)   | 1<br>(0.5-1.6)      |
| Ghana                      | 127.2<br>(120.3-134.4)                               | 99.4<br>(93.7-105)     | 69.1<br>(64.2-74.3)    | 46.2<br>(37.1-57)    | 2.3<br>(1.6-3)                                                       | 3.5<br>(2.8-4.3)   | 4.5<br>(2.2-6.9)    |
| Greece                     | 10.4<br>(10.1-10.7)                                  | 6.4<br>(6.2-6.6)       | 3.9<br>(3.8-4.1)       | 3.8<br>(3.3-4.2)     | 4.6<br>(4.1-5.1)                                                     | 5.4<br>(4.9-6)     | 0.4<br>(-1-1.9)     |
| Grenada                    | 22.4<br>(20.8-24.1)                                  | 15.5<br>(14.1-16.9)    | 15.1<br>(13.7-16.6)    | 16.5<br>(13.5-20.2)  | 3.9<br>(2.7-5.1)                                                     | 0.4<br>(-0.9-1.8)  | -1<br>(-3.5-1.5)    |
| Guatemala                  | 80.1<br>(75.3-85.1)                                  | 51.9<br>(48.2-55.9)    | 34.7<br>(31.1-38.7)    | 24.5<br>(19-31.4)    | 4.4<br>(3.7-5.1)                                                     | 4<br>(3.2-4.8)     | 3.8<br>(1.6-6.1)    |
| Guinea                     | 231.2<br>(215.8-247.3)                               | 164.3<br>(153.1-176)   | 118.1<br>(108.2-129.3) | 98.8<br>(82.7-118.7) | 3.3<br>(2.8-3.9)                                                     | 3.4<br>(2.7-4.2)   | 2<br>(0.2-3.6)      |
| Guinea-Bissau              | 221.2<br>(196.9-248.1)                               | 173<br>(156-192.7)     | 113.1<br>(93.7-137)    | 78.5<br>(49.4-120)   | 2.4<br>(1.3-3.5)                                                     | 4.2<br>(2.5-6)     | 4.1<br>(0.4-8.1)    |
| Guyana                     | 60.1<br>(54.4-66.7)                                  | 46.3<br>(41.8-51.5)    | 37.3<br>(29.8-46.7)    | 29.3<br>(18.2-47.5)  | 2.6<br>(1.5-3.8)                                                     | 2.2<br>(0.1-4.3)   | 2.7<br>(-1.2-6.6)   |
| Haiti                      | 144.6<br>(135.2-154.8)                               | 103.7<br>(95.5-111.9)  | 207<br>(186.2-231.2)   | 62.8<br>(47.6-84.1)  | 3.3<br>(2.7-4.1)                                                     | 2.7<br>(1.6-3.6)   | 13.3<br>(10.5-15.8) |
| Honduras                   | 58<br>(53.5-62.8)                                    | 37<br>(33.9-40.5)      | 23.3<br>(20.3-26.9)    | 16.8<br>(11.2-25.2)  | 4.5<br>(3.8-5.1)                                                     | 4.6<br>(3.6-5.8)   | 3.6<br>(-0.4-7.7)   |
| Hungary                    | 17.2<br>(16.8-17.6)                                  | 10.1<br>(9.9-10.4)     | 6<br>(5.8-6.2)         | 3.7<br>(3.2-4.2)     | 5.3<br>(4.8-5.7)                                                     | 5.5<br>(4.9-6)     | 5.5<br>(4-6.9)      |
| Iceland                    | 6.5<br>(5.9-7.1)                                     | 4<br>(3.6-4.5)         | 2.6<br>(2.3-3)         | 2<br>(1.5-2.6)       | 4.7<br>(3.3-6.1)                                                     | 4.4<br>(2.8-6)     | 3.2<br>(0-6.4)      |
| India                      | 126.2<br>(122-130.8)                                 | 91.8<br>(88.3-95.3)    | 58.2<br>(55.5-61.2)    | 34.3<br>(30.7-37.9)  | 3.1<br>(2.7-3.5)                                                     | 4.5<br>(3.9-5)     | 5.9<br>(4.7-7.3)    |
| Indonesia                  | 84<br>(80.1-88.2)                                    | 52.2<br>(49.6-55)      | 33.9<br>(31.4-36.7)    | 23.9<br>(20.1-28.9)  | 4.8<br>(4.3-5.3)                                                     | 4.3<br>(3.7-4.9)   | 3.9<br>(2.1-5.5)    |
| Iran (Islamic Republic of) | 56.1<br>(51.8-61)                                    | 34.3<br>(31.1-38.1)    | 19.7<br>(16.7-23.3)    | 13.9<br>(8.6-22.7)   | 4.8<br>(3.8-5.8)                                                     | 5.6<br>(3.8-7.5)   | 3.9<br>(-0.7-8.4)   |
| Iraq                       | 53.5<br>(48.9-58.4)                                  | 44<br>(40.2-48.2)      | 34.6<br>(30.6-39.3)    | 25.9<br>(20-33.2)    | 1.9<br>(1.1-2.7)                                                     | 2.3<br>(1.3-3.3)   | 3.2<br>(1-5.7)      |
| Ireland                    | 9.2<br>(8.8-9.5)                                     | 7.1<br>(6.9-7.5)       | 4.2<br>(4-4.3)         | 3.3<br>(2.8-3.8)     | 2.5<br>(2-3.1)                                                       | 5.7<br>(5.1-6.3)   | 2.7<br>(0.9-4.6)    |
| Israel                     | 11.6<br>(11.4-11.9)                                  | 6.9<br>(6.7-7.1)       | 4.6<br>(4.4-4.7)       | 3.7<br>(3.5-3.9)     | 5.4<br>(5-5.8)                                                       | 4.2<br>(3.8-4.6)   | 2.4<br>(1.7-3.1)    |
| Italy                      | 9.7                                                  | 5.6                    | 4                      | 3.1                  | 5.5                                                                  | 3.5                | 2.6                 |

|                                     | Under-five mortality rate<br>(per 1,000 live births) |               |               |              | Average annual rate of reduction in<br>under-five mortality rate (%) |            |            |
|-------------------------------------|------------------------------------------------------|---------------|---------------|--------------|----------------------------------------------------------------------|------------|------------|
|                                     | 1990                                                 | 2000          | 2010          | 2019         | 1990-1999                                                            | 2000-2009  | 2010-2019  |
|                                     | (9.5-9.9)                                            | (5.5-5.7)     | (3.9-4)       | (2.9-3.4)    | (5.2-5.8)                                                            | (3.2-3.8)  | (1.7-3.5)  |
| Jamaica                             | 30.3                                                 | 22            | 18.1          | 13.9         | 3.2                                                                  | 1.9        | 3          |
|                                     | (25.9-35.9)                                          | (19-25.5)     | (13.9-24)     | (8-24.2)     | (1.8-5)                                                              | (-0.6-4)   | (-1.7-7.8) |
| Japan                               | 6.3                                                  | 4.5           | 3.2           | 2.5          | 3.2                                                                  | 3.4        | 2.9        |
|                                     | (6.2-6.4)                                            | (4.4-4.6)     | (3.1-3.3)     | (2.3-2.6)    | (2.9-3.5)                                                            | (3.1-3.7)  | (2.3-3.5)  |
| Jordan                              | 36                                                   | 26.9          | 20.2          | 15.6         | 2.9                                                                  | 2.8        | 2.9        |
|                                     | (33.6-38.4)                                          | (24.9-29.1)   | (17.8-23)     | (11.7-20.9)  | (2.1-3.7)                                                            | (1.7-4)    | (0.4-5.3)  |
| Kazakhstan                          | 51.8                                                 | 42.2          | 20.4          | 10.5         | 1.6                                                                  | 7          | 7.4        |
|                                     | (47-57)                                              | (38.5-46.1)   | (19.9-20.9)   | (10.1-10.8)  | (0.7-2.5)                                                            | (6-8)      | (7-7.9)    |
| Kenya                               | 101.5                                                | 98.5          | 57.9          | 43.2         | -0.1                                                                 | 5.5        | 3.3        |
|                                     | (95.2-108.3)                                         | (91.6-106.3)  | (52.2-64.2)   | (31.9-59.3)  | (-0.9-0.7)                                                           | (4.5-6.5)  | (-0.1-6.3) |
| Kiribati                            | 95.5                                                 | 71            | 64.5          | 50.9         | 3                                                                    | 0.9        | 2.6        |
|                                     | (82.4-110.3)                                         | (62.6-80.2)   | (50.8-81.9)   | (29.6-86.8)  | (1.4-4.5)                                                            | (-1.2-3.1) | (-2-7.4)   |
| Kuwait                              | 17.5                                                 | 12.4          | 10.4          | 7.9          | 3.6                                                                  | 1.6        | 3          |
|                                     | (16.9-18.1)                                          | (12-12.7)     | (10.1-10.7)   | (7.2-8.8)    | (3.1-4.1)                                                            | (1.1-2.1)  | (1.8-4.2)  |
| Kyrgyzstan                          | 65                                                   | 49.7          | 29.5          | 18.3         | 2.4                                                                  | 5          | 5.3        |
|                                     | (57.6-73.4)                                          | (44.3-54.3)   | (28.7-30.3)   | (17.5-19.4)  | (1.1-3.8)                                                            | (3.6-6.1)  | (4.6-5.9)  |
| Lao People's<br>Democratic Republic | 153                                                  | 106.4         | 68            | 45.5         | 3.6                                                                  | 4.4        | 4.5        |
|                                     | (140.6-166.4)                                        | (97.8-116.3)  | (59.7-77.2)   | (33.7-59.7)  | (2.8-4.4)                                                            | (3.4-5.6)  | (2.1-7.1)  |
| Latvia                              | 17                                                   | 14.2          | 7.8           | 3.6          | 1.1                                                                  | 5.9        | 8.6        |
|                                     | (16.5-17.6)                                          | (13.5-14.9)   | (7.4-8.3)     | (2.9-4.6)    | (0.5-1.8)                                                            | (5.1-6.8)  | (5.9-11.2) |
| Lebanon                             | 32.1                                                 | 19.8          | 10.3          | 7.2          | 4.8                                                                  | 6.7        | 3.9        |
|                                     | (28.7-35.9)                                          | (16.7-23.5)   | (6.5-15.4)    | (3.6-13.9)   | (3-6.5)                                                              | (3.4-11.1) | (-0.8-8.9) |
| Lesotho                             | 85.2                                                 | 106.8         | 97.9          | 86.4         | -2.2                                                                 | 0.3        | 1.4        |
|                                     | (77.2-94.6)                                          | (97.9-116.3)  | (86.9-110.2)  | (59.4-124.3) | (-3.3-1)                                                             | (-1-1.6)   | (-2.2-5.3) |
| Liberia                             | 262.6                                                | 188           | 100.8         | 84.6         | 3                                                                    | 6.6        | 1.9        |
|                                     | (241.5-286.6)                                        | (174.4-203.3) | (91.7-110.8)  | (66.3-108.4) | (2.1-3.8)                                                            | (5.6-7.6)  | (-0.8-4.6) |
| Libya                               | 41.7                                                 | 28.1          | 16.6          | 11.5         | 4.1                                                                  | 5.2        | 4.1        |
|                                     | (35.6-48.8)                                          | (26.5-29.8)   | (14.8-18.7)   | (7.2-18.4)   | (2.5-5.6)                                                            | (4.1-6.3)  | (-0.5-8.7) |
| Lithuania                           | 15                                                   | 10.7          | 6.1           | 3.7          | 3.3                                                                  | 5.3        | 5.6        |
|                                     | (14.4-15.5)                                          | (10.2-11.3)   | (5.7-6.5)     | (3.2-4.2)    | (2.6-3.9)                                                            | (4.5-6.1)  | (4-7.3)    |
| Luxembourg                          | 8.7                                                  | 4.7           | 3             | 2.8          | 6.3                                                                  | 4.6        | 1          |
|                                     | (8-9.4)                                              | (4.2-5.2)     | (2.7-3.4)     | (2.1-3.6)    | (5-7.6)                                                              | (3.2-6.1)  | (-1.9-3.9) |
| Madagascar                          | 157.3                                                | 106.5         | 68.5          | 50.6         | 3.8                                                                  | 4.5        | 3.4        |
|                                     | (146.9-168.8)                                        | (98.7-115.1)  | (61.1-76.4)   | (40.3-63.9)  | (3-4.6)                                                              | (3.5-5.6)  | (1.1-5.5)  |
| Malawi                              | 242.8                                                | 172.6         | 84.9          | 41.6         | 3.1                                                                  | 7.3        | 7.9        |
|                                     | (229-257.1)                                          | (162.6-183.5) | (77.4-93.4)   | (27-60.9)    | (2.6-3.6)                                                            | (6.4-8.1)  | (3.6-12.9) |
| Malaysia                            | 16.6                                                 | 10.2          | 8.1           | 8.6          | 4.6                                                                  | 2.6        | -0.7       |
|                                     | (16.1-17)                                            | (10-10.4)     | (7.9-8.2)     | (8.1-9)      | (4.2-4.9)                                                            | (2.3-2.9)  | (-1.3-0.1) |
| Maldives                            | 85.8                                                 | 38.9          | 13.9          | 7.6          | 7.6                                                                  | 10.7       | 6.7        |
|                                     | (78.4-94.3)                                          | (35.3-42.8)   | (13.1-14.7)   | (6.7-8.7)    | (6.6-8.6)                                                            | (9.5-11.8) | (5-8.4)    |
| Mali                                | 230                                                  | 187.2         | 130.3         | 94           | 1.9                                                                  | 3.6        | 3.6        |
|                                     | (216.4-244.2)                                        | (176-199.6)   | (120.2-141.7) | (76-116.5)   | (1.4-2.5)                                                            | (2.9-4.4)  | (1.5-5.7)  |
| Malta                               | 11.4                                                 | 7.6           | 6.8           | 7            | 4.1                                                                  | 1.2        | -0.3       |
|                                     | (10.6-12.2)                                          | (6.9-8.3)     | (6.2-7.5)     | (5.6-8.8)    | (2.9-5.2)                                                            | (-0.1-2.5) | (-3-2.4)   |
| Marshall Islands                    | 49.3                                                 | 40.9          | 38.7          | 31.8         | 2.1                                                                  | 0.5        | 2.2        |
|                                     | (42.1-57.5)                                          | (35.3-47.6)   | (31.8-46.9)   | (19.8-50.6)  | (0.3-3.8)                                                            | (-1.7-2.8) | (-2-6.4)   |
| Mauritania                          | 117.7                                                | 112.7         | 96.6          | 72.9         | 0.4                                                                  | 1.4        | 3.1        |
|                                     | (105.9-130.5)                                        | (100.1-127.1) | (66.3-140.4)  | (37.5-140)   | (-1-1.8)                                                             | (-1.9-4.8) | (-1.9-8.2) |
| Mauritius                           | 23                                                   | 18.8          | 14.5          | 16           | 1.4                                                                  | 2.8        | -1.1       |
|                                     | (22-24.1)                                            | (17.8-19.8)   | (13.6-15.5)   | (14.5-17.8)  | (0.6-2.1)                                                            | (1.9-3.7)  | (-2.5-0.2) |
| Mexico                              | 45.3                                                 | 28.2          | 19.1          | 14.2         | 4.7                                                                  | 3.9        | 3.3        |
|                                     | (42.2-48.7)                                          | (26.2-30.3)   | (18.1-20.3)   | (12.9-15.6)  | (4.1-5.5)                                                            | (3.3-4.6)  | (2.1-4.5)  |
| Micronesia (Federated<br>States of) | 54.8                                                 | 52.6          | 39.4          | 29.4         | 0.3                                                                  | 2.9        | 3.3        |
|                                     | (44-68.5)                                            | (35.9-77.4)   | (20.2-76.3)   | (12-72.5)    | (-2.6-3)                                                             | (-2-7.7)   | (-2-8.4)   |
| Monaco                              | 7.8                                                  | 5.2           | 4             | 3.1          | 4.2                                                                  | 2.6        | 2.8        |
|                                     | (7-8.6)                                              | (4.9-5.5)     | (3.7-4.3)     | (2.1-4.5)    | (2.8-5.5)                                                            | (1.6-3.6)  | (-1.1-6.6) |
| Mongolia                            | 108.1                                                | 65.5          | 30.2          | 15.6         | 4.8                                                                  | 7.8        | 7.3        |



|                             | Under-five mortality rate<br>(per 1,000 live births) |               |               |              | Average annual rate of reduction in<br>under-five mortality rate (%) |            |            |
|-----------------------------|------------------------------------------------------|---------------|---------------|--------------|----------------------------------------------------------------------|------------|------------|
|                             | 1990                                                 | 2000          | 2010          | 2019         | 1990-1999                                                            | 2000-2009  | 2010-2019  |
|                             | (99.6-117.6)                                         | (60-71.2)     | (29.3-31.1)   | (15.1-16.2)  | (3.8-5.8)                                                            | (6.8-8.7)  | (6.8-7.8)  |
| Montenegro                  | 16.5                                                 | 14.2          | 6.6           | 2.3          | 1.4                                                                  | 7.4        | 11.5       |
|                             | (15.7-17.3)                                          | (13.5-15)     | (6.1-7.1)     | (1.9-2.9)    | (0.5-2.2)                                                            | (6.4-8.4)  | (9.1-14)   |
| Morocco                     | 79.1                                                 | 49.4          | 31.8          | 21.4         | 4.7                                                                  | 4.4        | 4.4        |
|                             | (73.7-84.9)                                          | (44.9-54.2)   | (28-35.9)     | (16.1-28.2)  | (3.9-5.6)                                                            | (3.2-5.6)  | (1.9-6.9)  |
| Mozambique                  | 243.1                                                | 169.7         | 104.9         | 74.2         | 3.4                                                                  | 5.1        | 3.8        |
|                             | (224.4-264.4)                                        | (156.9-183.7) | (95-116)      | (52.2-108.9) | (2.7-4)                                                              | (4.2-5.9)  | (0-7.3)    |
| Myanmar                     | 114.6                                                | 89            | 63.4          | 44.7         | 2.5                                                                  | 3.3        | 3.9        |
|                             | (105.1-125.6)                                        | (82.1-96.6)   | (55-72.5)     | (31.1-62.5)  | (1.6-3.4)                                                            | (2.2-4.6)  | (0.8-7.2)  |
| Namibia                     | 72.3                                                 | 75.4          | 49.7          | 42.4         | -0.5                                                                 | 4.2        | 1.8        |
|                             | (65.8-79.7)                                          | (67.9-84.4)   | (40.4-62)     | (24.8-77)    | (-1.8-0.9)                                                           | (2-6.3)    | (-3.5-6.5) |
| Nauru                       | 60.3                                                 | 41.5          | 38.9          | 30.9         | 3.8                                                                  | 0.6        | 2.6        |
|                             | (36.2-99.2)                                          | (35.5-48.5)   | (28-52.4)     | (17-55.6)    | (-1-8.7)                                                             | (-2.4-4)   | (-2.2-7.2) |
| Nepal                       | 139.8                                                | 81            | 46.6          | 30.8         | 5.4                                                                  | 5.5        | 4.6        |
|                             | (131.1-148.9)                                        | (75.8-86.8)   | (42.2-51.6)   | (23.6-40.7)  | (4.8-6)                                                              | (4.7-6.4)  | (1.9-7.2)  |
| Netherlands                 | 8.3                                                  | 6.2           | 4.4           | 4            | 3.1                                                                  | 3.4        | 1          |
|                             | (8.2-8.5)                                            | (6.1-6.3)     | (4.3-4.5)     | (3.9-4.2)    | (2.8-3.4)                                                            | (3-3.8)    | (0.4-1.6)  |
| New Zealand                 | 11.2                                                 | 7.4           | 6.1           | 4.7          | 4.3                                                                  | 1.9        | 2.9        |
|                             | (10.9-11.5)                                          | (7.2-7.6)     | (6-6.4)       | (4.1-5.4)    | (3.8-4.7)                                                            | (1.4-2.4)  | (1.3-4.7)  |
| Nicaragua                   | 66.5                                                 | 38.5          | 23.9          | 16.6         | 5.5                                                                  | 4.8        | 4          |
|                             | (61.7-71.5)                                          | (34.8-42.3)   | (21.3-26.1)   | (14.5-19.5)  | (4.5-6.5)                                                            | (3.8-6)    | (1.8-5.9)  |
| Niger                       | 328.6                                                | 224.8         | 122.2         | 80.4         | 3.8                                                                  | 6          | 4.7        |
|                             | (307.5-351.2)                                        | (208.6-242.5) | (104.9-141.1) | (51.2-125)   | (3.1-4.4)                                                            | (4.7-7.5)  | (0.4-8.9)  |
| Nigeria                     | 209.5                                                | 183.1         | 136           | 117.2        | 1.2                                                                  | 3.1        | 1.7        |
|                             | (195.7-223.4)                                        | (172.1-194.6) | (124.8-147.9) | (92.2-152.5) | (0.6-1.7)                                                            | (2.3-3.8)  | (-1.1-4.1) |
| Niue                        | 13.4                                                 | 23.7          | 29.9          | 23.2         | -5.6                                                                 | -2.8       | 2.8        |
|                             | (8.4-21.5)                                           | (15.8-35.8)   | (15.3-60.1)   | (9.6-57.7)   | (-11-0.5)                                                            | (-7.7-2.1) | (-2.3-7.9) |
| Norway                      | 8.7                                                  | 4.9           | 3.3           | 2.4          | 6.1                                                                  | 3.9        | 3.2        |
|                             | (8.4-9)                                              | (4.7-5.1)     | (3.1-3.4)     | (2.2-2.7)    | (5.6-6.7)                                                            | (3.2-4.6)  | (2-4.4)    |
| Oman                        | 38.7                                                 | 16.4          | 11.7          | 11.4         | 8.7                                                                  | 3.6        | 0.3        |
|                             | (33.9-44.2)                                          | (14.4-18.8)   | (11.4-12.1)   | (10.3-12.7)  | (7.4-10.1)                                                           | (2.2-5.1)  | (-0.9-1.5) |
| Pakistan                    | 139.5                                                | 107.5         | 87.1          | 67.2         | 2.6                                                                  | 2.1        | 2.9        |
|                             | (134.4-144.9)                                        | (102.8-112.2) | (81.8-92.7)   | (57.6-78.4)  | (2.1-3.1)                                                            | (1.4-2.7)  | (1.4-4.4)  |
| Palau                       | 35.4                                                 | 28.8          | 23            | 17.3         | 2                                                                    | 2.2        | 3.1        |
|                             | (30.3-41.4)                                          | (24.6-33.8)   | (15.3-34.8)   | (8.8-33.6)   | (-0.2-4.3)                                                           | (-1.7-6)   | (-1.7-8)   |
| Panama                      | 30.7                                                 | 25.9          | 19.9          | 14.9         | 1.7                                                                  | 2.6        | 3.2        |
|                             | (27-34.4)                                            | (22.3-29.8)   | (14.3-27.6)   | (8.1-27.2)   | (0.1-3.2)                                                            | (0-5.2)    | (-1.7-8.1) |
| Papua New Guinea            | 84.7                                                 | 70.6          | 57.3          | 44.8         | 1.8                                                                  | 2          | 2.7        |
|                             | (77.1-92.7)                                          | (63.5-78.8)   | (48.8-67.4)   | (32.2-61.5)  | (0.8-2.7)                                                            | (0.7-3.3)  | (0-5.6)    |
| Paraguay                    | 45.3                                                 | 33.7          | 26            | 19.4         | 3                                                                    | 2.5        | 3.2        |
|                             | (40.8-50.4)                                          | (28.2-40.4)   | (17.6-39.6)   | (10.3-38.5)  | (1.5-4.5)                                                            | (-0.9-5.5) | (-1.7-8.1) |
| Peru                        | 80.3                                                 | 38.5          | 19.9          | 13.2         | 7.3                                                                  | 6.7        | 4.6        |
|                             | (76.3-84.6)                                          | (36.3-40.8)   | (18.6-21.3)   | (10.7-16.5)  | (6.6-7.9)                                                            | (5.9-7.5)  | (2.2-6.7)  |
| Philippines                 | 56.6                                                 | 37.7          | 31.7          | 27.3         | 4.3                                                                  | 1.8        | 1.7        |
|                             | (52.8-60.7)                                          | (35.1-40.6)   | (28.8-35)     | (20.7-36.1)  | (3.5-5.1)                                                            | (0.7-2.8)  | (-1.2-4.6) |
| Poland                      | 17.4                                                 | 9.3           | 6             | 4.4          | 6.2                                                                  | 4.3        | 3.4        |
|                             | (17-17.8)                                            | (9.1-9.5)     | (5.8-6.1)     | (4.2-4.5)    | (5.9-6.5)                                                            | (4-4.6)    | (2.9-3.9)  |
| Portugal                    | 14.7                                                 | 7.2           | 3.8           | 3.7          | 7.2                                                                  | 6.8        | 0.4        |
|                             | (14.4-15.1)                                          | (7-7.4)       | (3.7-4)       | (3.4-3.9)    | (6.8-7.6)                                                            | (6.3-7.3)  | (-0.5-1.3) |
| Qatar                       | 20.8                                                 | 12.5          | 9.1           | 6.5          | 5.3                                                                  | 3.2        | 3.7        |
|                             | (19.5-22.2)                                          | (11.9-13.1)   | (8.7-9.5)     | (5.7-7.4)    | (4.3-6.2)                                                            | (2.5-4)    | (2.1-5.3)  |
| Republic of Korea           | 15.4                                                 | 7.5           | 4.1           | 3.2          | 7.3                                                                  | 6.2        | 2.8        |
|                             | (14.6-16.2)                                          | (7.3-7.8)     | (4-4.2)       | (3-3.4)      | (6.6-8)                                                              | (5.8-6.6)  | (2.2-3.5)  |
| Republic of Moldova         | 33.2                                                 | 31.4          | 17.1          | 14.4         | -0.3                                                                 | 6.6        | 1.9        |
|                             | (28.5-38.5)                                          | (26-37.3)     | (14.9-20.5)   | (10.6-19.2)  | (-2.3-1.6)                                                           | (4-8.6)    | (-1.7-5.8) |
| Republic of North Macedonia | 35.7                                                 | 15.8          | 10.1          | 6.1          | 8.3                                                                  | 4.3        | 5.5        |
|                             | (34.6-36.9)                                          | (15.1-16.6)   | (9.5-10.7)    | (5.4-6.9)    | (7.7-8.9)                                                            | (3.5-5.1)  | (4-7.1)    |
| Romania                     | 30.9                                                 | 21.4          | 12.4          | 7            | 3.3                                                                  | 5.5        | 6.4        |
|                             | (30.1-31.7)                                          | (20.8-22)     | (12-12.7)     | (6.7-7.3)    | (2.9-3.7)                                                            | (5.1-5.9)  | (5.8-6.9)  |

|                                     | Under-five mortality rate<br>(per 1,000 live births) |                        |                        |                       | Average annual rate of reduction in<br>under-five mortality rate (%) |                    |                    |
|-------------------------------------|------------------------------------------------------|------------------------|------------------------|-----------------------|----------------------------------------------------------------------|--------------------|--------------------|
|                                     | 1990                                                 | 2000                   | 2010                   | 2019                  | 1990-1999                                                            | 2000-2009          | 2010-2019          |
| Russian Federation                  | 21.6<br>(21.2-22)                                    | 19.3<br>(18.9-19.7)    | 10.4<br>(10.2-10.6)    | 5.8<br>(5.6-6)        | 0.8<br>(0.5-1.1)                                                     | 6.5<br>(6.2-6.8)   | 6.5<br>(6.1-6.9)   |
| Rwanda                              | 149.8<br>(140.6-159.8)                               | 178.7<br>(165.1-193.9) | 63.7<br>(55.8-72.6)    | 34.3<br>(19.7-60.2)   | -3<br>(-4-2)                                                         | 10.3<br>(9.1-11.5) | 6.9<br>(1.2-12.5)  |
| Saint Kitts and Nevis               | 30.5<br>(27.8-33.4)                                  | 23.8<br>(21.3-26.6)    | 17.5<br>(15.3-20)      | 15.4<br>(11-21.6)     | 2.3<br>(0.9-3.7)                                                     | 3.3<br>(1.7-4.9)   | 1.5<br>(-2.1-5)    |
| Saint Lucia                         | 21.8<br>(20.8-22.9)                                  | 18.5<br>(17.5-19.6)    | 19.5<br>(18.2-20.8)    | 22.3<br>(19.5-25.7)   | 1.8<br>(1.2-2.4)                                                     | -0.4<br>(-1.1-0.3) | -1.5<br>(-2.9-0.1) |
| Saint Vincent and the<br>Grenadines | 23.8<br>(22.2-25.4)                                  | 22.2<br>(20.5-24)      | 19.8<br>(18.1-21.6)    | 14.6<br>(11.5-18.4)   | 0.7<br>(-0.4-1.8)                                                    | 1<br>(-0.2-2.2)    | 3.4<br>(0.7-6.1)   |
| Samoa                               | 29.8<br>(26.1-34.1)                                  | 20.7<br>(18-23.5)      | 18.4<br>(15.5-21.4)    | 15<br>(10.3-21.8)     | 3.6<br>(2.2-5.1)                                                     | -1.6<br>(-3.3-0)   | 2.3<br>(-1.2-5.5)  |
| San Marino                          | 13.8<br>(10.6-17.9)                                  | 6<br>(4.5-8.2)         | 2.7<br>(1.8-4.2)       | 1.7<br>(0.9-3.3)      | 8.3<br>(4.9-11.7)                                                    | 8<br>(4.3-11.6)    | 5.3<br>(0.8-9.8)   |
| Sao Tome and<br>Principe            | 107.6<br>(95.1-121.9)                                | 84<br>(73.1-96.5)      | 45<br>(35.5-56.4)      | 29.8<br>(18.4-48.6)   | 2.2<br>(0.6-3.7)                                                     | 6.3<br>(4.8-5)     | 4.6<br>(0.5-8.7)   |
| Saudi Arabia                        | 44.4<br>(36.9-53)                                    | 22<br>(19.6-24.6)      | 11.9<br>(10.2-15.1)    | 6.6<br>(5-9)          | 7.1<br>(5.4-9.1)                                                     | 6<br>(3.3-7.6)     | 6.5<br>(3.6-10.5)  |
| Senegal                             | 138.6<br>(131.7-145.8)                               | 129.1<br>(121.6-137.5) | 66.3<br>(61.3-71.7)    | 45.3<br>(35.2-58.2)   | 0.4<br>(-0.3-1)                                                      | 6.8<br>(5.9-7.8)   | 4.2<br>(1.4-7.1)   |
| Serbia                              | 27.9<br>(27.2-28.6)                                  | 12.7<br>(12.3-13.1)    | 7.6<br>(7.3-7.9)       | 5.3<br>(4.3-6.6)      | 8.3<br>(7.9-8.8)                                                     | 5.4<br>(4.9-6)     | 4<br>(1.6-6.4)     |
| Seychelles                          | 16.3<br>(14.8-17.9)                                  | 13.8<br>(12.4-15.2)    | 14.1<br>(12.7-15.6)    | 14.2<br>(10.7-18.9)   | 1.9<br>(0.5-3.2)                                                     | -0.2<br>(-1.6-1.2) | -0.1<br>(-3.2-3)   |
| Sierra Leone                        | 259.8<br>(239.6-281)                                 | 227.7<br>(212.2-244.1) | 160.5<br>(147.9-173.8) | 109.2<br>(90.5-131.6) | 1.2<br>(0.4-2)                                                       | 3.4<br>(2.7-4.1)   | 4.3<br>(2.4-6.1)   |
| Singapore                           | 7.7<br>(7.4-8)                                       | 3.9<br>(3.6-4.1)       | 2.8<br>(2.6-3)         | 2.5<br>(2.2-2.9)      | 6.9<br>(6.1-7.7)                                                     | 3.4<br>(2.4-4.4)   | 1.2<br>(-0.4-2.8)  |
| Slovakia                            | 14.7<br>(14.5-15)                                    | 9.8<br>(9.5-10)        | 7<br>(6.8-7.2)         | 5.8<br>(5.5-6.1)      | 4.1<br>(3.8-4.5)                                                     | 3.4<br>(3-3.8)     | 2.2<br>(1.4-2.9)   |
| Slovenia                            | 10.4<br>(10-10.7)                                    | 5.5<br>(5.2-5.8)       | 3.2<br>(3-3.4)         | 2.1<br>(1.8-2.4)      | 6.4<br>(5.8-7.1)                                                     | 5.4<br>(4.6-6.1)   | 4.8<br>(3.1-6.3)   |
| Solomon Islands                     | 38.4<br>(33.5-43.8)                                  | 30.4<br>(27.2-34)      | 25.9<br>(22-30.5)      | 19.7<br>(13-29.1)     | 2.4<br>(1.1-3.7)                                                     | 1.5<br>(-0.1-3.1)  | 3.1<br>(-0.5-7)    |
| Somalia                             | 178.2<br>(148.4-217.5)                               | 171.1<br>(135.4-221.2) | 156.1<br>(109.8-227.3) | 117<br>(59.8-235.3)   | 0.4<br>(-0.8-1.6)                                                    | 0.7<br>(-1-2.3)    | 3.2<br>(-2-8.4)    |
| South Africa                        | 57.3<br>(51.1-64.1)                                  | 71.1<br>(66.6-76)      | 51.2<br>(48.5-53.9)    | 34.5<br>(30.5-38.8)   | -2.1<br>(-3.3-1)                                                     | 1.9<br>(1-2.9)     | 4.4<br>(2.9-5.9)   |
| South Sudan                         | 250.2<br>(207.3-294.3)                               | 181.2<br>(154-212)     | 106.8<br>(75.9-142.7)  | 96.2<br>(38.5-193.6)  | 3.1<br>(1.3-4.7)                                                     | 5.3<br>(2.5-8.7)   | 1.2<br>(-4.1-8.3)  |
| Spain                               | 9.1<br>(9-9.3)                                       | 5.4<br>(5.3-5.5)       | 3.8<br>(3.8-3.9)       | 3.1<br>(2.9-3.4)      | 5.4<br>(5.1-5.7)                                                     | 3.4<br>(3.1-3.7)   | 2.4<br>(1.4-3.3)   |
| Sri Lanka                           | 21.9<br>(21.5-22.3)                                  | 16.5<br>(16.2-16.9)    | 11.6<br>(11.3-11.9)    | 7.1<br>(5.8-8.6)      | 2.7<br>(2.4-3)                                                       | 3.6<br>(3.3-3.9)   | 5.5<br>(3.2-7.7)   |
| State of Palestine                  | 44.5<br>(41-48.2)                                    | 30<br>(27.6-32.5)      | 23.2<br>(19.9-27.1)    | 19.4<br>(13.9-27.8)   | 4<br>(3.2-4.9)                                                       | 2.6<br>(1.2-4)     | 1.9<br>(-1.1-4.7)  |
| Sudan                               | 130.6<br>(121.2-140.9)                               | 103.5<br>(95.2-112.5)  | 75.4<br>(66.4-85.5)    | 58.4<br>(42.7-78.4)   | 2.2<br>(1.5-3)                                                       | 3.2<br>(2.2-4.2)   | 2.8<br>(0.1-5.7)   |
| Suriname                            | 45<br>(38.3-52.9)                                    | 31.2<br>(26.4-36.4)    | 23.1<br>(18.5-28.7)    | 18<br>(12.2-27.5)     | 3.7<br>(2.1-5.5)                                                     | 3.1<br>(1.4-9)     | 2.8<br>(-0.9-5.7)  |
| Sweden                              | 7<br>(6.8-7.2)                                       | 4.1<br>(4-4.3)         | 3.1<br>(2.9-3.2)       | 2.6<br>(2.4-2.8)      | 5.8<br>(5.3-6.4)                                                     | 3<br>(2.4-3.6)     | 1.9<br>(1-2.8)     |
| Switzerland                         | 8.2<br>(8-8.4)                                       | 5.6<br>(5.5-5.8)       | 4.6<br>(4.4-4.7)       | 4<br>(3.6-4.5)        | 4<br>(3.5-4.5)                                                       | 2.2<br>(1.7-2.8)   | 1.4<br>(0-2.8)     |
| Syrian Arab Republic                | 36.6<br>(33.1-40.3)                                  | 23.1<br>(20.7-25.7)    | 19<br>(15.7-22.2)      | 21.5<br>(12.3-28.3)   | 4.7<br>(3.6-5.8)                                                     | 2.2<br>(0.5-4.1)   | -1.4<br>(-4.4-3.2) |
| Tajikistan                          | 101.9<br>(92.9-111.8)                                | 83.6<br>(74.7-93.3)    | 42.9<br>(37.3-49.5)    | 33.8<br>(21.9-53.3)   | 1.4<br>(0.3-2.5)                                                     | 7<br>(5.4-8.6)     | 2.7<br>(-2.6-7.6)  |

|                                    | Under-five mortality rate<br>(per 1,000 live births) |                        |                     |                     | Average annual rate of reduction in<br>under-five mortality rate (%) |                    |                    |
|------------------------------------|------------------------------------------------------|------------------------|---------------------|---------------------|----------------------------------------------------------------------|--------------------|--------------------|
|                                    | 1990                                                 | 2000                   | 2010                | 2019                | 1990-1999                                                            | 2000-2009          | 2010-2019          |
| Thailand                           | 36.9<br>(34.6-39.2)                                  | 22<br>(19.7-24)        | 13.6<br>(12-15.3)   | 9<br>(7.7-11.5)     | 5.2<br>(4.4-6.3)                                                     | 4.8<br>(3.7-5.8)   | 4.6<br>(2.3-5.9)   |
| Timor-Leste                        | 174.7<br>(157.4-194)                                 | 108.1<br>(98.1-119.2)  | 61.8<br>(49.7-76.2) | 44.2<br>(26.4-74.3) | 4.8<br>(3.7-5.8)                                                     | 5.7<br>(4-7.6)     | 3.7<br>(-1-8.4)    |
| Togo                               | 144.5<br>(134.2-155.6)                               | 117.9<br>(109.5-126.9) | 88<br>(79.8-96.8)   | 66.9<br>(53.8-82.7) | 2<br>(1.2-2.6)                                                       | 2.9<br>(2.2-3.8)   | 3<br>(1.1-5)       |
| Tonga                              | 22.2<br>(18.7-26.5)                                  | 18<br>(15.3-21.2)      | 16.8<br>(14.1-20)   | 16.6<br>(12.2-22.3) | 2.2<br>(0.5-3.8)                                                     | 0.7<br>(-1.1-2.7)  | 0.1<br>(-2.9-3.2)  |
| Trinidad and Tobago                | 30.4<br>(25.3-35.6)                                  | 28.2<br>(21.2-38.9)    | 22.9<br>(13.2-44.1) | 17.5<br>(7.7-41.2)  | 0.8<br>(-2.6-3.2)                                                    | 1.9<br>(-2.5-5.8)  | 3<br>(-1.9-8.4)    |
| Tunisia                            | 55.3<br>(48.6-62.7)                                  | 29.9<br>(26.1-34.1)    | 18.4<br>(17.6-19.2) | 16.9<br>(15.5-18.3) | 6<br>(4.6-7.4)                                                       | 5.1<br>(3.5-6.7)   | 1<br>(-0.2-2.1)    |
| Turkey                             | 73.9<br>(69-79.1)                                    | 38.6<br>(35.6-42)      | 18.2<br>(16.7-19.6) | 10<br>(8.9-11.4)    | 6.4<br>(5.5-7.2)                                                     | 7.5<br>(6.7-8.6)   | 6.6<br>(4.9-8.1)   |
| Turkmenistan                       | 79.8<br>(69.8-91.1)                                  | 69.8<br>(60.6-80.6)    | 42.8<br>(33.5-54.1) | 42<br>(30-58.5)     | 0.9<br>(-0.6-2.3)                                                    | 5.2<br>(2.7-8)     | 0.2<br>(-4.1-4.2)  |
| Tuvalu                             | 53.1<br>(44.1-64.2)                                  | 41.1<br>(36.9-45.5)    | 31.8<br>(23.2-43.7) | 23.9<br>(13.2-44.6) | 2.5<br>(0.4-4.7)                                                     | 2.5<br>(-0.6-5.6)  | 3.2<br>(-1.8-8)    |
| Uganda                             | 182.1<br>(171.5-193.3)                               | 146.3<br>(137.6-155.4) | 77<br>(71.2-83)     | 45.8<br>(34.8-60)   | 2<br>(1.4-2.6)                                                       | 6.4<br>(5.6-7.2)   | 5.8<br>(2.8-8.7)   |
| Ukraine                            | 19.4<br>(17.5-22.1)                                  | 18.3<br>(16.8-20.5)    | 11.7<br>(11.4-12.1) | 8.4<br>(8-8.8)      | 0.2<br>(-0.9-1.2)                                                    | 4.4<br>(3.4-5.7)   | 3.7<br>(3-4.4)     |
| United Arab Emirates               | 16.6<br>(14-19.4)                                    | 11.2<br>(10.6-11.9)    | 8.5<br>(8.2-8.7)    | 7.5<br>(6.4-8.7)    | 4<br>(2.5-5.6)                                                       | 2.8<br>(2.1-3.6)   | 1.4<br>(-0.4-3.2)  |
| United Kingdom                     | 9.3<br>(9.1-9.5)                                     | 6.5<br>(6.4-6.7)       | 5.2<br>(5.1-5.3)    | 4.3<br>(4.1-4.5)    | 3.7<br>(3.4-4)                                                       | 2.2<br>(1.9-2.5)   | 2.1<br>(1.5-2.7)   |
| United Republic of Tanzania        | 165.1<br>(155.6-175.5)                               | 128.8<br>(120.9-137.5) | 71.9<br>(65.4-79.4) | 50.3<br>(37.8-68.6) | 2.1<br>(1.4-2.8)                                                     | 5.9<br>(5-6.9)     | 4<br>(0.8-7)       |
| United States of America           | 11.2<br>(11-11.4)                                    | 8.4<br>(8.3-8.6)       | 7.3<br>(7.2-7.5)    | 6.5<br>(6.1-6.9)    | 3<br>(2.7-3.3)                                                       | 1.4<br>(1.1-1.6)   | 1.4<br>(0.6-2.1)   |
| Uruguay                            | 22.9<br>(22.5-23.4)                                  | 17<br>(16.6-17.4)      | 10.7<br>(10.3-11)   | 7.1<br>(6.6-7.5)    | 3<br>(2.6-3.3)                                                       | 4.6<br>(4.1-5)     | 4.6<br>(3.8-5.4)   |
| Uzbekistan                         | 72.3<br>(63.8-81.9)                                  | 62<br>(54-71.8)        | 33.3<br>(27.1-40.4) | 17.4<br>(14.2-21.4) | 1.3<br>(-0.3-2.8)                                                    | 6.1<br>(4.2-8.3)   | 7.2<br>(4-10.3)    |
| Vanuatu                            | 35.3<br>(29.5-42.1)                                  | 28.3<br>(24.1-33.4)    | 29.6<br>(23.4-37.7) | 25.9<br>(15.7-42.7) | 2.4<br>(0.9-3.9)                                                     | -0.4<br>(-2.6-1.8) | 1.5<br>(-2.7-5.7)  |
| Venezuela (Bolivarian Republic of) | 29.5<br>(28.7-30.4)                                  | 21.6<br>(21.1-22)      | 17.1<br>(16.7-17.4) | 24.2<br>(20-29.6)   | 0.8<br>(0.4-1.1)                                                     | 2.6<br>(2.3-2.9)   | -3.9<br>(-6.1-1.7) |
| Viet Nam                           | 51.3<br>(47.3-55.8)                                  | 29.7<br>(25.1-34.6)    | 22.9<br>(20.7-25)   | 19.9<br>(16.1-25.4) | 5.5<br>(3.8-7.4)                                                     | 2.8<br>(1.3-4)     | 1.5<br>(-1.7-4.1)  |
| Yemen                              | 125.8<br>(118-134.5)                                 | 94.8<br>(87.1-103.1)   | 56<br>(48.2-64.8)   | 58.4<br>(35-94.7)   | 2.6<br>(1.9-3.4)                                                     | 5.5<br>(4.1-6.9)   | -0.5<br>(-4.9-4.4) |
| Zambia                             | 179.5<br>(168.5-191.2)                               | 152.1<br>(142.2-163)   | 79.6<br>(73.2-86.4) | 61.7<br>(48.8-77.6) | 1.4<br>(0.8-2)                                                       | 6.6<br>(5.8-7.4)   | 2.8<br>(0.3-5.4)   |
| Zimbabwe                           | 76.6<br>(69.9-83.5)                                  | 92.7<br>(84.1-101.6)   | 87.6<br>(80.3-95.7) | 54.6<br>(41.1-71.7) | -2.3<br>(-3.5-1.1)                                                   | 0.1<br>(-1.2-1.2)  | 5.3<br>(2.2-8.4)   |

### 3.2. Table A.2 Levels and trends in NMR, by country, 1990-2019

Note: Numbers in brackets are 90% uncertainty intervals.

|                                     | Neonatal mortality rate<br>(per 1,000 live births) |                     |                     |                     | Average annual rate of reduction in<br>neonatal mortality rate (%) |                     |                    |
|-------------------------------------|----------------------------------------------------|---------------------|---------------------|---------------------|--------------------------------------------------------------------|---------------------|--------------------|
|                                     | 1990                                               | 2000                | 2010                | 2019                | 1990-1999                                                          | 2000-2009           | 2010-2019          |
| Afghanistan                         | 74.3<br>(66.4-83.1)                                | 60.6<br>(55.3-66.7) | 47.2<br>(42.6-52.3) | 35.9<br>(27.8-45.2) | 2<br>(0.8-3.3)                                                     | 2.4<br>(1.3-3.6)    | 3.1<br>(0.8-5.6)   |
| Albania                             | 12.6<br>(9.8-15.8)                                 | 12.2<br>(9.9-14.8)  | 6.7<br>(5.9-7.4)    | 7.5<br>(6.9-8.2)    | 0.1<br>(-3.2-3.3)                                                  | 5.6<br>(3.2-7.9)    | -1.3<br>(-2.7-0)   |
| Algeria                             | 23.2<br>(20.6-26)                                  | 21<br>(19-23.1)     | 17.5<br>(16.9-18.2) | 16.3<br>(15.6-17)   | 1.1<br>(-0.6-2.7)                                                  | 1.6<br>(0.4-2.7)    | 0.8<br>(0.3-1.3)   |
| Andorra                             | 7<br>(1.7-27.5)                                    | 3.9<br>(1.9-7.9)    | 2.2<br>(1-4.8)      | 1.4<br>(0.4-5.5)    | 5.8<br>(-4.5-16.2)                                                 | 5.9<br>(-3.4-15.9)  | 4.8<br>(-4.8-14)   |
| Angola                              | 53.3<br>(43.7-65.8)                                | 50.3<br>(41.9-60.4) | 36.2<br>(24.6-51.4) | 27.6<br>(12.2-53.7) | 0.5<br>(-2.2-3.2)                                                  | 3.2<br>(-0.4-7.2)   | 3<br>(-2.1-9.2)    |
| Antigua and Barbuda                 | 8.1<br>(6.9-9.4)                                   | 9.6<br>(8.5-10.9)   | 5.9<br>(5-6.8)      | 3.6<br>(2.5-5.3)    | -2.1<br>(-4.1-0)                                                   | 4.7<br>(2.7-6.7)    | 5.3<br>(1.3-9.5)   |
| Argentina                           | 14.9<br>(14.4-15.4)                                | 10.9<br>(10.6-11.3) | 7.7<br>(7.4-7.9)    | 6.1<br>(5.7-6.5)    | 3.5<br>(3.1-3.8)                                                   | 3.8<br>(3.4-4.1)    | 2.6<br>(1.8-3.3)   |
| Armenia                             | 22.5<br>(19.5-26.2)                                | 16.4<br>(14.3-18.8) | 10.1<br>(8-12.5)    | 6.4<br>(4.3-9.1)    | 3.1<br>(1.4-4.9)                                                   | 4.9<br>(2.7-7.2)    | 5.1<br>(2.3-8.2)   |
| Australia                           | 4.6<br>(4.5-4.8)                                   | 3.5<br>(3.4-3.6)    | 2.7<br>(2.6-2.8)    | 2.3<br>(2.1-2.4)    | 3<br>(2.5-3.4)                                                     | 2.4<br>(2-2.8)      | 2<br>(1.2-2.8)     |
| Austria                             | 4.6<br>(4.4-4.8)                                   | 3.1<br>(2.9-3.3)    | 2.5<br>(2.4-2.7)    | 2.1<br>(1.7-2.4)    | 4.4<br>(3.7-5.1)                                                   | 2.1<br>(1.3-2.9)    | 2.2<br>(0.2-4.1)   |
| Azerbaijan                          | 32.9<br>(27.3-39.1)                                | 33.5<br>(28.3-40.1) | 19.9<br>(16-24.8)   | 10.9<br>(6.6-17.5)  | -0.6<br>(-3.2-1.7)                                                 | 5.1<br>(2.4-7.9)    | 6.7<br>(1.6-12.1)  |
| Bahamas                             | 13.8<br>(12.7-15)                                  | 8.1<br>(7.3-8.9)    | 8.1<br>(7.4-8.9)    | 6.7<br>(5-8.9)      | 6<br>(4.6-7.3)                                                     | -0.3<br>(-1.8-1.1)  | 2.1<br>(-1.2-5.4)  |
| Bahrain                             | 15.1<br>(14.1-16.1)                                | 4.8<br>(4.3-5.2)    | 3.2<br>(2.8-3.5)    | 2.9<br>(2.2-3.9)    | 11.7<br>(10.5-12.9)                                                | 4.5<br>(3.1-5.9)    | 0.8<br>(-2.6-4.1)  |
| Bangladesh                          | 64.2<br>(60.5-68.2)                                | 42.8<br>(40.2-45.4) | 28.3<br>(26.7-30)   | 19.1<br>(17-21.3)   | 4.1<br>(3.3-4.8)                                                   | 4.1<br>(3.3-4.8)    | 4.4<br>(3.1-5.8)   |
| Barbados                            | 11.8<br>(10.8-12.7)                                | 9.3<br>(8.4-10.2)   | 10<br>(9-11)        | 8.4<br>(5.8-11.9)   | 2.7<br>(1.4-4)                                                     | -0.9<br>(-2.4-0.6)  | 1.9<br>(-1.8-5.7)  |
| Belarus                             | 8.5<br>(6.5-10.8)                                  | 6<br>(5.2-6.8)      | 1.8<br>(1.5-2.2)    | 1.2<br>(1-1.5)      | 2.8<br>(-1-6.6)                                                    | 12.5<br>(10.9-14.2) | 4.6<br>(2.1-7.2)   |
| Belgium                             | 4.6<br>(4.4-4.8)                                   | 2.9<br>(2.8-3.1)    | 2.3<br>(2.2-2.5)    | 2<br>(1.6-2.4)      | 4.4<br>(3.8-5)                                                     | 2.3<br>(1.6-3)      | 1.7<br>(-0.5-4)    |
| Belize                              | 18.1<br>(15.2-21.4)                                | 12<br>(10.8-13.3)   | 9.3<br>(8.4-10.3)   | 8.1<br>(6.9-9.6)    | 4.1<br>(2.2-6)                                                     | 3.5<br>(2-5)        | 1.5<br>(-0.6-3.7)  |
| Benin                               | 45.7<br>(41.5-50.3)                                | 39.6<br>(35.8-43.5) | 34.5<br>(30.8-38.5) | 30.6<br>(25.3-36.5) | 1.4<br>(0.5-2.4)                                                   | 1.4<br>(0.4-2.4)    | 1.3<br>(-0.3-3.1)  |
| Bhutan                              | 42.1<br>(30.9-53.9)                                | 31.7<br>(26.1-37.8) | 22.2<br>(17.5-28.1) | 16.6<br>(9.8-27)    | 2.8<br>(-1.1-6.3)                                                  | 3.5<br>(0.5-6.4)    | 3.3<br>(-1.2-8.1)  |
| Bolivia (Plurinational<br>State of) | 40.9<br>(37.1-44.8)                                | 29.1<br>(25.3-32.4) | 21.2<br>(18.4-24.3) | 14.6<br>(10.6-19.7) | 3.4<br>(2.2-4.8)                                                   | 3.1<br>(0.9-4.7)    | 4.1<br>(1.4-7.3)   |
| Bosnia and Herzegovina              | 11.3<br>(10.8-11.7)                                | 6.9<br>(6.5-7.2)    | 5.1<br>(4.8-5.4)    | 4.2<br>(3.5-5.1)    | 4.9<br>(4.1-5.6)                                                   | 3.1<br>(2.3-3.9)    | 2.1<br>(-0.1-4.4)  |
| Botswana                            | 16.8<br>(13.2-21.1)                                | 5.8<br>(4.1-8.5)    | 10.5<br>(5.3-19.1)  | 17.9<br>(5.7-40.6)  | 11.1<br>(7.3-14.4)                                                 | -5.3<br>(-11-0.9)   | -6<br>(-14.1-4.6)  |
| Brazil                              | 25.3<br>(22.2-28.4)                                | 18<br>(15.5-20.3)   | 11.2<br>(10.6-11.8) | 7.9<br>(6.4-9.5)    | 3.4<br>(1.7-5.2)                                                   | 4.8<br>(3.2-6.2)    | 3.9<br>(1.8-6.1)   |
| Brunei Darussalam                   | 5.6<br>(5-6.3)                                     | 5<br>(4.5-5.5)      | 4.8<br>(4.4-5.3)    | 6<br>(5.2-7)        | 1.4<br>(-0.4-3.2)                                                  | 0.3<br>(-1.3-1.8)   | -2.4<br>(-4.5-0.3) |
| Bulgaria                            | 8.1<br>(7.7-8.4)                                   | 7.8<br>(7.5-8.2)    | 5.1<br>(4.9-5.4)    | 3.3<br>(3.1-3.6)    | -0.1<br>(-0.6-0.4)                                                 | 4.6<br>(4-5.2)      | 4.8<br>(3.8-5.8)   |
| Burkina Faso                        | 45.6<br>(40.4-51.1)                                | 40.9<br>(36.1-45.9) | 30.9<br>(25.3-37.1) | 25.9<br>(16.6-38.8) | 1<br>(-0.4-2.4)                                                    | 2.9<br>(1.4-9)      | 1.9<br>(-1.9-5.9)  |
| Burundi                             | 39.9                                               | 36.9                | 27.8                | 21                  | 0.7                                                                | 2.7                 | 3.1                |

|                                       | Neonatal mortality rate<br>(per 1,000 live births) |             |             |             | Average annual rate of reduction in<br>neonatal mortality rate (%) |            |            |
|---------------------------------------|----------------------------------------------------|-------------|-------------|-------------|--------------------------------------------------------------------|------------|------------|
|                                       | 1990                                               | 2000        | 2010        | 2019        | 1990-1999                                                          | 2000-2009  | 2010-2019  |
|                                       | (34.4-45.9)                                        | (31.8-42.3) | (23.4-32.9) | (13.6-32.3) | (-1.1-2.5)                                                         | (0.7-4.7)  | (-1.3-7.5) |
| Cabo Verde                            | 19.9                                               | 17.6        | 15.3        | 9           | 0.9                                                                | 1.3        | 5.9        |
|                                       | (17.4-22.6)                                        | (15.5-19.9) | (14-16.7)   | (7.2-11.3)  | (-1.2-2.9)                                                         | (-0.4-3)   | (3.3-8.7)  |
| Cambodia                              | 40.1                                               | 35.3        | 21.2        | 14.5        | 1                                                                  | 5.1        | 4.2        |
|                                       | (36-44.9)                                          | (31.2-39.7) | (17.5-25.6) | (7.5-27.9)  | (-0.4-2.4)                                                         | (2.9-7.3)  | (-2.7-11)  |
| Cameroon                              | 40.2                                               | 35.2        | 31.2        | 26.1        | 1.2                                                                | 1.2        | 2          |
|                                       | (36-44.5)                                          | (31.1-39.4) | (27.4-35.2) | (20.4-33)   | (-0.1-2.5)                                                         | (-0.3-2.7) | (-0.5-4.6) |
| Canada                                | 4.4                                                | 3.7         | 3.7         | 3.3         | 1.7                                                                | -0.1       | 1.3        |
|                                       | (4.2-4.5)                                          | (3.6-3.8)   | (3.6-3.8)   | (3.1-3.6)   | (1.3-2.1)                                                          | (-0.4-0.3) | (0.4-2.3)  |
| Central African Republic              | 52                                                 | 49.4        | 46.8        | 39.7        | 0.5                                                                | 0.5        | 1.8        |
|                                       | (45-60.4)                                          | (40.1-60.8) | (33.4-65.4) | (22.1-72.8) | (-1.5-2.6)                                                         | (-2.2-3.1) | (-3-6.7)   |
| Chad                                  | 51.9                                               | 44.4        | 38          | 33.3        | 1.5                                                                | 1.6        | 1.5        |
|                                       | (46.1-58.5)                                        | (39.1-50.1) | (32.7-44.2) | (23.4-46.6) | (0.1-3)                                                            | (0-3.3)    | (-1.8-4.9) |
| Chile                                 | 8.6                                                | 5.7         | 5.3         | 4.6         | 3.9                                                                | 0.8        | 1.7        |
|                                       | (8.2-9)                                            | (5.5-5.9)   | (5.1-5.5)   | (3.4-6.1)   | (3.5-4.4)                                                          | (0.4-1.3)  | (-1.5-4.9) |
| China                                 | 29.6                                               | 21          | 8.4         | 3.9         | 3.3                                                                | 9.1        | 8.6        |
|                                       | (26.3-33.5)                                        | (19.2-22.8) | (7.6-9.2)   | (3.2-4.6)   | (1.6-5)                                                            | (7.8-10.5) | (6.4-10.9) |
| Colombia                              | 17.7                                               | 13.5        | 10          | 7.5         | 2.6                                                                | 2.9        | 3.2        |
|                                       | (16.2-19.3)                                        | (12.3-14.9) | (8.6-11.7)  | (5.2-10.7)  | (1.6-3.7)                                                          | (1.4-4.4)  | (-0.1-6.7) |
| Comoros                               | 49.6                                               | 40.6        | 36.2        | 29.8        | 2.2                                                                | 1          | 2.2        |
|                                       | (41.2-59)                                          | (25.8-55.7) | (17.3-67.4) | (11.1-70.4) | (-1.4-6.8)                                                         | (-4.8-6.4) | (-3.8-8.3) |
| Congo                                 | 27.1                                               | 30.7        | 22.3        | 19.3        | -1.4                                                               | 3.3        | 1.6        |
|                                       | (23.1-31.7)                                        | (26.5-35.4) | (18.8-26.5) | (11.1-34.1) | (-3.4-0.5)                                                         | (1.1-5.4)  | (-4.3-7.1) |
| Cook Islands                          | 13.3                                               | 10          | 5.9         | 4.1         | 2.6                                                                | 5.3        | 3.9        |
|                                       | (9.9-16.6)                                         | (6.9-12.9)  | (3.7-8.6)   | (2.1-7.7)   | (0.6-4.9)                                                          | (2.5-8.2)  | (-1-8.8)   |
| Costa Rica                            | 9                                                  | 7.7         | 6.7         | 6.2         | 1.5                                                                | 1.5        | 0.9        |
|                                       | (8.5-9.4)                                          | (7.3-8)     | (6.4-7)     | (5.8-6.5)   | (1-2.1)                                                            | (0.9-2.1)  | (0.1-1.7)  |
| Cote d'Ivoire                         | 48.7                                               | 45.1        | 38.8        | 33          | 0.7                                                                | 1.5        | 1.8        |
|                                       | (43.6-53.9)                                        | (40.3-50.5) | (33.4-44.3) | (25.2-42.7) | (-0.7-2)                                                           | (0.1-3)    | (-0.6-4.2) |
| Croatia                               | 8.1                                                | 5.6         | 3.6         | 2.9         | 3.9                                                                | 4.6        | 2.2        |
|                                       | (7.7-8.5)                                          | (5.3-5.9)   | (3.3-3.8)   | (2.5-3.4)   | (3.1-4.6)                                                          | (3.7-5.5)  | (0.4-4.2)  |
| Cuba                                  | 6.8                                                | 4.3         | 2.9         | 2.2         | 5                                                                  | 4          | 3.1        |
|                                       | (6.3-7.5)                                          | (3.9-4.7)   | (2.6-3.2)   | (1.9-2.6)   | (4-6)                                                              | (2.9-5.1)  | (0.9-4.8)  |
| Cyprus                                | 6.2                                                | 3.7         | 2           | 1.3         | 5.2                                                                | 6          | 4.7        |
|                                       | (5.2-7.2)                                          | (3.1-4.1)   | (1.7-2.4)   | (0.9-2)     | (2.8-7.5)                                                          | (3.6-8.3)  | (-0.3-9.3) |
| Czechia                               | 7.3                                                | 2.7         | 1.7         | 1.6         | 10.1                                                               | 4.8        | 0.3        |
|                                       | (7-7.6)                                            | (2.5-2.9)   | (1.6-1.8)   | (1.5-1.8)   | (9.5-10.8)                                                         | (3.9-5.6)  | (-0.9-1.6) |
| Democratic People's Republic of Korea | 21.3                                               | 26.3        | 16.2        | 9.5         | -3.2                                                               | 5          | 5.9        |
|                                       | (14.5-30)                                          | (16.3-39.5) | (10-23.8)   | (5.6-14.2)  | (-5.3-0.6)                                                         | (3.1-6.9)  | (4.3-7.9)  |
| Democratic Republic of the Congo      | 41.7                                               | 38.5        | 32.5        | 27.4        | 0.8                                                                | 1.6        | 1.9        |
|                                       | (35.6-48.4)                                        | (32.9-44.7) | (25.7-40)   | (16.5-43.7) | (-1.3-2.9)                                                         | (-0.7-4.2) | (-2.5-6.4) |
| Denmark                               | 4.4                                                | 3.5         | 2.9         | 3           | 2                                                                  | 2.4        | -0.5       |
|                                       | (4.1-4.6)                                          | (3.3-3.7)   | (2.7-3)     | (2.5-3.4)   | (1-2.9)                                                            | (1.5-3.3)  | (-2.2-1.7) |
| Djibouti                              | 49.2                                               | 43.9        | 37.3        | 30.5        | 1.1                                                                | 1.6        | 2.2        |
|                                       | (40.8-59.2)                                        | (35.9-53.4) | (28.4-49)   | (17.5-52)   | (-1.5-3.6)                                                         | (-1.4-4.7) | (-2.3-7.1) |
| Dominica                              | 10.4                                               | 12.9        | 19.5        | 28.1        | -2                                                                 | -4.1       | -4         |
|                                       | (9.4-11.4)                                         | (11.8-14)   | (17.7-21.5) | (23.6-33.1) | (-3.1-0.9)                                                         | (-5.1-3.1) | (-5.5-2.6) |
| Dominican Republic                    | 24.4                                               | 23.4        | 22.8        | 19.4        | 0.4                                                                | 0.3        | 1.8        |
|                                       | (22.1-26.9)                                        | (21.2-25.7) | (19.3-26.7) | (13.2-28.6) | (-0.8-1.7)                                                         | (-1.5-2)   | (-1.8-5.4) |
| Ecuador                               | 22.2                                               | 14.5        | 9.2         | 7.1         | 4.2                                                                | 4.6        | 3          |
|                                       | (19-25.5)                                          | (12.5-16.7) | (7.9-10.8)  | (6.2-7.9)   | (2.4-5.9)                                                          | (2.8-6.3)  | (0.6-5.4)  |
| Egypt                                 | 33.3                                               | 22.3        | 15.9        | 11.1        | 4                                                                  | 3.3        | 4          |
|                                       | (30.9-35.8)                                        | (20.5-24.2) | (14-18.1)   | (7.7-16.2)  | (3.1-5)                                                            | (1.9-4.7)  | (0.3-7.6)  |
| El Salvador                           | 22.4                                               | 14.8        | 9.4         | 6.6         | 4.2                                                                | 4.6        | 4          |
|                                       | (19.8-25.8)                                        | (12.8-16.8) | (7.5-11.9)  | (4-10.7)    | (2.5-6.2)                                                          | (2.1-6.8)  | (-0.3-8.1) |
| Equatorial Guinea                     | 47.9                                               | 44.4        | 34.9        | 29          | 0.7                                                                | 2.4        | 2.1        |
|                                       | (37.1-61.8)                                        | (36-55.3)   | (24.7-47.2) | (14.9-52.5) | (-3.2-4.5)                                                         | (-0.9-6.2) | (-3.3-7.6) |
| Eritrea                               | 34.7                                               | 26.5        | 21.7        | 17.8        | 2.8                                                                | 2          | 2.2        |
|                                       | (29.9-39.6)                                        | (23.3-30)   | (17.7-26.8) | (10.3-30.7) | (1.2-4.2)                                                          | (-0.2-3.9) | (-2.9-7.3) |

|                            | Neonatal mortality rate<br>(per 1,000 live births) |                     |                     |                     | Average annual rate of reduction in<br>neonatal mortality rate (%) |                    |                    |
|----------------------------|----------------------------------------------------|---------------------|---------------------|---------------------|--------------------------------------------------------------------|--------------------|--------------------|
|                            | 1990                                               | 2000                | 2010                | 2019                | 1990-1999                                                          | 2000-2009          | 2010-2019          |
| Estonia                    | 9.9<br>(9.2-10.5)                                  | 5.3<br>(4.8-5.8)    | 2.2<br>(1.9-2.4)    | 1.1<br>(0.9-1.3)    | 5.9<br>(4.8-7)                                                     | 9.1<br>(7.6-10.5)  | 7.8<br>(5.1-10.6)  |
| Eswatini                   | 21.5<br>(18.1-25.3)                                | 21.6<br>(18.7-24.8) | 19.8<br>(16.2-24.3) | 18.4<br>(11.4-29)   | 0<br>(-2.1-2.1)                                                    | 1<br>(-1.4-3.4)    | 0.8<br>(-3.5-5.3)  |
| Ethiopia                   | 58.9<br>(52.7-65.5)                                | 48.2<br>(43.3-53.3) | 38<br>(34.1-42.3)   | 27.6<br>(22.4-34.2) | 2<br>(0.9-3.2)                                                     | 2.3<br>(0.9-3.6)   | 3.5<br>(1.3-5.8)   |
| Fiji                       | 12.2<br>(9.6-15.4)                                 | 9.1<br>(8.1-10.1)   | 9.6<br>(8.5-10.8)   | 10.8<br>(9-13)      | 3.1<br>(0.3-5.9)                                                   | -1<br>(-2.4-0.6)   | -1.3<br>(-3.4-0.8) |
| Finland                    | 3.9<br>(3.7-4.1)                                   | 2.5<br>(2.3-2.6)    | 1.7<br>(1.6-1.8)    | 1.4<br>(1.2-1.6)    | 4.5<br>(3.7-5.4)                                                   | 3.7<br>(2.7-4.6)   | 2<br>(0.4-3.6)     |
| France                     | 3.6<br>(3.5-3.8)                                   | 2.7<br>(2.6-2.9)    | 2.3<br>(2.2-2.4)    | 2.7<br>(2.5-2.9)    | 2.9<br>(2.4-3.3)                                                   | 1.8<br>(1.4-2.3)   | -1.7<br>(-2.7-0.8) |
| Gabon                      | 31.1<br>(25.6-37.5)                                | 28.5<br>(23.6-34.6) | 24.7<br>(19.4-31.1) | 20.2<br>(12.2-33.2) | 0.9<br>(-1.5-3.1)                                                  | 1.4<br>(-1.3-4.2)  | 2.2<br>(-2.3-6.7)  |
| Gambia                     | 45.8<br>(35.2-56.5)                                | 37.6<br>(31.2-43.7) | 32.9<br>(28-38.7)   | 27.1<br>(21.7-33.8) | 2<br>(-1.2-5.1)                                                    | 1.3<br>(-1.2-3.4)  | 2.1<br>(-0.1-4.4)  |
| Georgia                    | 24.8<br>(21.7-28.3)                                | 22.4<br>(19.4-26.2) | 10.1<br>(9.3-10.9)  | 4.9<br>(4.1-5.9)    | 0.8<br>(-1.2-2.6)                                                  | 7.9<br>(6.1-9.8)   | 8.1<br>(5.8-10.3)  |
| Germany                    | 3.4<br>(3.2-3.5)                                   | 2.8<br>(2.7-2.9)    | 2.3<br>(2.2-2.4)    | 2.3<br>(2.1-2.4)    | 2<br>(1.6-2.4)                                                     | 1.8<br>(1.4-2.2)   | 0.1<br>(-0.6-0.9)  |
| Ghana                      | 42.3<br>(38.7-46)                                  | 36.1<br>(33-39.1)   | 29.8<br>(27.1-32.7) | 23.1<br>(18.3-29)   | 1.5<br>(0.4-2.6)                                                   | 1.9<br>(0.7-2.9)   | 2.8<br>(0.3-5.4)   |
| Greece                     | 6.5<br>(6.2-6.7)                                   | 3.9<br>(3.8-4.1)    | 2.1<br>(2-2.3)      | 2.3<br>(2-2.6)      | 4.6<br>(4-5.2)                                                     | 6.9<br>(6.1-7.7)   | -0.6<br>(-2.3-1.1) |
| Grenada                    | 12.3<br>(11-13.7)                                  | 8<br>(7-9.1)        | 8.9<br>(7.9-10)     | 11<br>(8.8-13.8)    | 4.7<br>(3-6.6)                                                     | -0.7<br>(-2.6-1.1) | -2.3<br>(-5.1-0.5) |
| Guatemala                  | 28.1<br>(25.4-30.9)                                | 21.2<br>(19.1-23.4) | 16.2<br>(14.2-18.4) | 12.2<br>(9.2-15.9)  | 2.8<br>(1.6-4)                                                     | 2.7<br>(1.4-4)     | 3.2<br>(0.6-5.8)   |
| Guinea                     | 61<br>(54.2-68.3)                                  | 45.5<br>(40.4-51.1) | 34.8<br>(30.3-39.7) | 30.4<br>(23-39.6)   | 2.6<br>(1.3-4)                                                     | 2.8<br>(1.3-4.4)   | 1.5<br>(-1.4-4.5)  |
| Guinea-Bissau              | 63.3<br>(53.8-73.8)                                | 54.7<br>(47-63.3)   | 44.2<br>(35.8-55)   | 35.1<br>(21.2-55.8) | 1.4<br>(-0.6-3.4)                                                  | 2<br>(-0.3-4.3)    | 2.6<br>(-1.5-7.1)  |
| Guyana                     | 30.5<br>(26.4-34.8)                                | 26.7<br>(23.3-30.6) | 22.5<br>(17.6-28.8) | 18.6<br>(11.3-30.9) | 1.2<br>(-0.6-2.9)                                                  | 1.7<br>(-0.7-4.1)  | 2.1<br>(-2-6.3)    |
| Haiti                      | 38.7<br>(33.8-44)                                  | 29.7<br>(25.9-33.9) | 30.8<br>(26.8-35.4) | 25.3<br>(17.5-36.1) | 2.7<br>(1.2-4.3)                                                   | 0.3<br>(-1.4-2.1)  | 2.2<br>(-1.4-5.9)  |
| Honduras                   | 21.9<br>(19.1-24.6)                                | 17.4<br>(15.5-19.4) | 12.8<br>(10.7-15.3) | 9.2<br>(5.8-14.4)   | 2.3<br>(0.9-3.6)                                                   | 3<br>(1.2-4.6)     | 3.7<br>(-0.6-8.1)  |
| Hungary                    | 11.1<br>(10.8-11.5)                                | 5.7<br>(5.5-6)      | 3.4<br>(3.2-3.5)    | 2<br>(1.7-2.3)      | 6.7<br>(6.2-7.3)                                                   | 5.5<br>(4.9-6.2)   | 5.8<br>(4.1-7.6)   |
| Iceland                    | 3.5<br>(3.1-3.9)                                   | 2.1<br>(1.8-2.4)    | 1.3<br>(1.1-1.5)    | 1<br>(0.7-1.4)      | 5.2<br>(3.3-7.1)                                                   | 4.7<br>(2.6-6.9)   | 3<br>(-0.7-6.6)    |
| India                      | 57.4<br>(54.5-60.6)                                | 45<br>(42.6-47.5)   | 32<br>(30-34)       | 21.7<br>(19.2-24.1) | 2.4<br>(1.7-3)                                                     | 3.4<br>(2.6-4.2)   | 4.3<br>(3-5.8)     |
| Indonesia                  | 30.6<br>(28.4-32.9)                                | 22.8<br>(21.1-24.5) | 17.4<br>(15.9-19)   | 12.4<br>(10.2-15.2) | 2.9<br>(2.1-3.7)                                                   | 2.7<br>(1.7-3.5)   | 3.7<br>(1.8-5.6)   |
| Iran (Islamic Republic of) | 25.4<br>(18.1-31.3)                                | 18.8<br>(15.7-22.1) | 12.2<br>(9.6-15.7)  | 8.6<br>(4.8-15)     | 3<br>(-1.1-6.2)                                                    | 4.2<br>(1.1-7)     | 4<br>(-1.2-9.4)    |
| Iraq                       | 26.1<br>(23.2-29)                                  | 23.6<br>(21.3-26.3) | 19.7<br>(17.1-22.7) | 15.3<br>(11.7-20)   | 1<br>(-0.4-2.2)                                                    | 1.7<br>(0.4-3.1)   | 2.8<br>(0.4-5.5)   |
| Ireland                    | 4.7<br>(4.5-5)                                     | 4<br>(3.8-4.2)      | 2.5<br>(2.3-2.6)    | 2.1<br>(1.8-2.5)    | 1.7<br>(0.8-2.5)                                                   | 5.4<br>(4.5-6.3)   | 1.9<br>(-0.2-4)    |
| Israel                     | 6.3<br>(6-6.5)                                     | 3.6<br>(3.4-3.7)    | 2.4<br>(2.3-2.5)    | 1.9<br>(1.8-2.1)    | 5.9<br>(5.3-6.4)                                                   | 4.4<br>(3.8-5)     | 2.3<br>(1.4-3.3)   |
| Italy                      | 6.4<br>(6.3-6.6)                                   | 3.5<br>(3.4-3.6)    | 2.4<br>(2.3-2.5)    | 1.9<br>(1.7-2.1)    | 6.2<br>(5.8-6.5)                                                   | 3.8<br>(3.5-4.2)   | 2.5<br>(1.3-3.7)   |
| Jamaica                    | 20.1<br>(15.8-24.8)                                | 16.7<br>(14.1-19.8) | 13<br>(9.6-17.8)    | 9.8<br>(5.4-18)     | 1.8<br>(-1-4.1)                                                    | 2.4<br>(-0.4-5.3)  | 3.2<br>(-1.9-8.3)  |
| Japan                      | 2.5                                                | 1.8                 | 1.1                 | 0.8                 | 3.7                                                                | 4.7                | 2.9                |

|                                     | Neonatal mortality rate<br>(per 1,000 live births) |             |             |             | Average annual rate of reduction in<br>neonatal mortality rate (%) |            |            |
|-------------------------------------|----------------------------------------------------|-------------|-------------|-------------|--------------------------------------------------------------------|------------|------------|
|                                     | 1990                                               | 2000        | 2010        | 2019        | 1990-1999                                                          | 2000-2009  | 2010-2019  |
|                                     | (2.5-2.6)                                          | (1.7-1.8)   | (1.1-1.1)   | (0.8-0.9)   | (3.3-4.1)                                                          | (4.3-5.2)  | (2.1-3.8)  |
| Jordan                              | 19.7                                               | 16.1        | 12          | 9.2         | 2                                                                  | 3          | 2.9        |
|                                     | (17.9-21.6)                                        | (14.6-17.8) | (10.2-13.9) | (6.6-12.7)  | (0.7-3.1)                                                          | (1.5-4.6)  | (0.1-5.8)  |
| Kazakhstan                          | 22.5                                               | 22.7        | 11.8        | 4.7         | -0.4                                                               | 5.7        | 10.3       |
|                                     | (19.6-25.8)                                        | (19.9-25.9) | (11.1-12.4) | (4.3-5)     | (-2.2-1.3)                                                         | (4.2-7.3)  | (9.6-11.1) |
| Kenya                               | 27.6                                               | 28.5        | 24.5        | 21          | -0.4                                                               | 1.5        | 1.7        |
|                                     | (24.6-30.7)                                        | (25.6-31.6) | (21.4-27.8) | (15-29.7)   | (-1.7-0.9)                                                         | (0-3)      | (-1.9-5.1) |
| Kiribati                            | 35.2                                               | 28.7        | 25.7        | 22.1        | 2                                                                  | 1.1        | 1.7        |
|                                     | (27.5-45.8)                                        | (23.3-35.4) | (16.9-35.8) | (10.3-41.1) | (-1.5-5.7)                                                         | (-2.4-5.6) | (-3.7-7.7) |
| Kuwait                              | 10.4                                               | 6.5         | 5.5         | 4.5         | 4.8                                                                | 1.7        | 2.2        |
|                                     | (9.7-11.3)                                         | (6.2-6.9)   | (5.2-5.8)   | (4-5.1)     | (3.9-5.9)                                                          | (1-2.5)    | (0.6-3.7)  |
| Kyrgyzstan                          | 24.3                                               | 20.5        | 17.2        | 12.3        | 1.5                                                                | 1.6        | 3.7        |
|                                     | (20.1-28.8)                                        | (17.1-23.9) | (15.6-18.7) | (10.3-14.3) | (-0.9-4.1)                                                         | (-0.6-3.6) | (1.6-5.9)  |
| Lao People's<br>Democratic Republic | 47.2                                               | 38          | 28.6        | 22          | 2.2                                                                | 2.8        | 2.9        |
|                                     | (42.1-53.1)                                        | (34.1-42.7) | (24.7-33.2) | (15.9-29.6) | (0.8-3.4)                                                          | (1.3-4.4)  | (0.2-5.9)  |
| Latvia                              | 8.4                                                | 7.2         | 4.2         | 1.9         | 0.7                                                                | 5.1        | 9.1        |
|                                     | (7.8-8.9)                                          | (6.6-7.7)   | (3.9-4.6)   | (1.4-2.4)   | (-0.2-1.7)                                                         | (3.9-6.3)  | (5.8-12.3) |
| Lebanon                             | 20.5                                               | 11.7        | 6           | 4.2         | 5.6                                                                | 6.9        | 4          |
|                                     | (17.7-23.5)                                        | (9-14.5)    | (3.3-9.5)   | (1.7-8.6)   | (3.1-8.8)                                                          | (2.7-12.1) | (-1.2-9.8) |
| Lesotho                             | 38.5                                               | 36.9        | 40.5        | 42.8        | 0.5                                                                | -0.9       | -0.6       |
|                                     | (33.7-43.9)                                        | (33.1-40.9) | (35.1-46.7) | (28.4-63.6) | (-1-2.1)                                                           | (-2.6-0.8) | (-4.6-3.7) |
| Liberia                             | 59.2                                               | 45.7        | 33          | 32.4        | 2.4                                                                | 3.5        | 0.2        |
|                                     | (51-68.3)                                          | (39.9-52)   | (28.7-37.5) | (24.5-43)   | (0.7-4.1)                                                          | (1.7-5.3)  | (-3.2-3.3) |
| Libya                               | 20.9                                               | 15.9        | 9.4         | 6.5         | 2.7                                                                | 5.2        | 4.1        |
|                                     | (17.5-25)                                          | (13.5-18.9) | (7.2-12)    | (3.7-11)    | (0.5-5)                                                            | (3.5-7.1)  | (-0.7-9.1) |
| Lithuania                           | 7.9                                                | 4.5         | 2.9         | 2           | 5.6                                                                | 4.3        | 3.8        |
|                                     | (7.4-8.4)                                          | (4.1-5)     | (2.6-3.2)   | (1.7-2.4)   | (4.6-6.6)                                                          | (3-5.6)    | (1.7-6)    |
| Luxembourg                          | 4.1                                                | 2.4         | 1.6         | 1.5         | 5.7                                                                | 4.5        | 0.7        |
|                                     | (3.7-4.7)                                          | (2.1-2.7)   | (1.3-1.8)   | (1.1-2)     | (3.7-7.5)                                                          | (2.4-6.5)  | (-2.8-4.3) |
| Madagascar                          | 39                                                 | 30.9        | 24          | 20.1        | 2.3                                                                | 2.5        | 2          |
|                                     | (35-43.6)                                          | (27.7-34.3) | (21-27.6)   | (15.6-26)   | (1-3.6)                                                            | (1.1-4)    | (-0.6-4.5) |
| Malawi                              | 49.5                                               | 38.7        | 28.2        | 19.8        | 2.2                                                                | 3.3        | 3.9        |
|                                     | (44.4-54.8)                                        | (34.6-42.8) | (25.1-31.8) | (12.7-29.8) | (1.1-3.3)                                                          | (1.8-4.7)  | (-0.6-9.1) |
| Malaysia                            | 7.6                                                | 4.9         | 4.2         | 4.6         | 4.1                                                                | 1.9        | -1.1       |
|                                     | (6.6-8.8)                                          | (4.4-5.6)   | (3.8-4.5)   | (4.2-5.1)   | (2.3-5.8)                                                          | (0.3-3.6)  | (-2.2-0.1) |
| Maldives                            | 39.4                                               | 21.8        | 7.6         | 4.9         | 5.4                                                                | 10.7       | 4.8        |
|                                     | (31.3-47.5)                                        | (18.6-25.2) | (6.7-8.6)   | (4.1-5.8)   | (2.3-8.2)                                                          | (8.8-12.6) | (2.5-7.2)  |
| Mali                                | 66.5                                               | 50.7        | 38.8        | 32.1        | 2.6                                                                | 2.7        | 2.1        |
|                                     | (60-73.9)                                          | (45.6-56.4) | (34.3-43.8) | (24.5-41.6) | (1.5-3.8)                                                          | (1.3-4.1)  | (-0.6-4.9) |
| Malta                               | 7.6                                                | 5.1         | 4.6         | 4.7         | 4.1                                                                | 1.2        | -0.3       |
|                                     | (7-8.2)                                            | (4.6-5.6)   | (4.1-5.1)   | (3.7-6)     | (2.8-5.4)                                                          | (-0.3-2.7) | (-3.2-2.6) |
| Marshall Islands                    | 19.4                                               | 18.3        | 17.6        | 15.3        | 0.7                                                                | 0.4        | 1.6        |
|                                     | (15.5-24.3)                                        | (14.9-22.4) | (12.7-23.7) | (8.8-26.2)  | (-2.5-3.8)                                                         | (-3.1-4)   | (-3.1-6.2) |
| Mauritania                          | 46.4                                               | 42.9        | 38.3        | 32          | 0.8                                                                | 1          | 2          |
|                                     | (40.3-53.7)                                        | (36.2-50.5) | (24.8-59)   | (15.5-64.5) | (-1.2-2.9)                                                         | (-2.8-5)   | (-3.3-7.5) |
| Mauritius                           | 14.6                                               | 12.4        | 9.3         | 10.2        | 0.7                                                                | 3          | -1         |
|                                     | (13.8-15.5)                                        | (11.6-13.2) | (8.6-10)    | (9.1-11.5)  | (-0.1-1.6)                                                         | (2-4)      | (-2.5-0.5) |
| Mexico                              | 22.2                                               | 14.2        | 9           | 8.6         | 4.2                                                                | 4.9        | 0.5        |
|                                     | (19.9-24.6)                                        | (12.8-15.7) | (8.4-9.7)   | (7.7-9.5)   | (2.9-5.6)                                                          | (3.9-6)    | (-0.8-1.8) |
| Micronesia (Federated<br>States of) | 24.7                                               | 24          | 19.5        | 15.9        | 0.2                                                                | 2.1        | 2.3        |
|                                     | (16.9-34.6)                                        | (13.8-39.6) | (8.8-41.9)  | (5.8-41.7)  | (-3.3-3.8)                                                         | (-3.3-7.3) | (-3.2-7.9) |
| Monaco                              | 4.3                                                | 2.9         | 2.2         | 1.7         | 4.1                                                                | 2.6        | 3          |
|                                     | (3.2-5.4)                                          | (2-3.7)     | (1.4-3)     | (0.9-2.8)   | (2.1-6.5)                                                          | (0.7-4.8)  | (-1.4-7.1) |
| Mongolia                            | 29.8                                               | 23.5        | 11.6        | 8.1         | 2                                                                  | 7          | 4          |
|                                     | (25.9-34.1)                                        | (20.5-26.7) | (10.8-12.5) | (7.6-8.7)   | (0-4.1)                                                            | (5.3-8.7)  | (3.1-4.9)  |
| Montenegro                          | 10.8                                               | 8.7         | 4.3         | 1.3         | 2.1                                                                | 6.6        | 13.3       |
|                                     | (9.8-11.8)                                         | (7.8-9.5)   | (3.8-4.9)   | (1-1.7)     | (0.6-4.1)                                                          | (4.7-8.2)  | (10-17)    |
| Morocco                             | 35.9                                               | 26.9        | 20          | 13.6        | 2.9                                                                | 2.9        | 4.3        |
|                                     | (32.6-39.5)                                        | (24-30)     | (17.3-23)   | (10.1-18.2) | (1.7-4.1)                                                          | (1.3-4.4)  | (1.7-7)    |

|                             | Neonatal mortality rate<br>(per 1,000 live births) |                     |                     |                     | Average annual rate of reduction in<br>neonatal mortality rate (%) |                    |                   |
|-----------------------------|----------------------------------------------------|---------------------|---------------------|---------------------|--------------------------------------------------------------------|--------------------|-------------------|
|                             | 1990                                               | 2000                | 2010                | 2019                | 1990-1999                                                          | 2000-2009          | 2010-2019         |
| Mozambique                  | 61.9<br>(55.6-69.2)                                | 46.1<br>(41.6-51.1) | 33.7<br>(29.4-38.4) | 28.5<br>(19.7-42.3) | 2.7<br>(1.6-3.9)                                                   | 3.3<br>(1.9-4.7)   | 1.8<br>(-2.1-5.4) |
| Myanmar                     | 47.4<br>(41-55.6)                                  | 37.3<br>(32.8-42.1) | 28.2<br>(23.4-33.3) | 22.4<br>(14.8-32.8) | 2.4<br>(0.5-4.4)                                                   | 2.8<br>(0.9-4.9)   | 2.5<br>(-1.1-6.4) |
| Namibia                     | 27.8<br>(24.4-31.6)                                | 22.6<br>(20.1-25.7) | 20.1<br>(15.9-25.4) | 19.1<br>(10.8-35.8) | 2.1<br>(0.2-3.8)                                                   | 1.4<br>(-1.4)      | 0.5<br>(-5.1-5.7) |
| Nauru                       | 29.1<br>(16.2-49.6)                                | 24.5<br>(20.1-30.1) | 23.9<br>(16.1-35.1) | 19.9<br>(10.1-37.6) | 1.7<br>(-4.7-7.4)                                                  | 0.2<br>(-3.9-4.5)  | 2<br>(-3.1-7.5)   |
| Nepal                       | 58.4<br>(53.5-63.6)                                | 40.4<br>(37.1-44)   | 27.3<br>(24.4-30.5) | 19.8<br>(15-26.4)   | 3.7<br>(2.8-4.6)                                                   | 3.9<br>(2.8-5)     | 3.6<br>(0.8-6.3)  |
| Netherlands                 | 4.6<br>(4.4-4.8)                                   | 3.8<br>(3.7-4)      | 2.8<br>(2.7-2.9)    | 2.6<br>(2.4-2.7)    | 2.1<br>(1.7-2.6)                                                   | 3.2<br>(2.7-3.7)   | 0.8<br>(0.1-1.6)  |
| New Zealand                 | 4.3<br>(4.1-4.6)                                   | 3.5<br>(3.3-3.7)    | 3.2<br>(3.1-3.4)    | 2.6<br>(2.1-3.2)    | 2.4<br>(1.6-3.2)                                                   | 1.4<br>(0.5-2.2)   | 2.3<br>(0.1-4.9)  |
| Nicaragua                   | 22.8<br>(20.3-25.6)                                | 16.5<br>(14.3-18.7) | 13.6<br>(11.8-15.5) | 10.2<br>(8.8-12.1)  | 3.2<br>(1.6-4.9)                                                   | 2<br>(0-3.8)       | 3.1<br>(0.7-5.4)  |
| Niger                       | 54.5<br>(48.6-61.1)                                | 43.1<br>(38-48.6)   | 30.5<br>(24.9-36.8) | 24.3<br>(14.9-39)   | 2.3<br>(1-3.6)                                                     | 3.5<br>(1.5-5.5)   | 2.5<br>(-2.7-1)   |
| Nigeria                     | 49.7<br>(44.5-55.1)                                | 46.3<br>(41.7-51)   | 38<br>(33.7-42.6)   | 35.9<br>(27.5-47.7) | 0.5<br>(-0.6-1.7)                                                  | 2.1<br>(0.9-3.4)   | 0.6<br>(-2.4-3.4) |
| Niue                        | 7.4<br>(4.3-12.4)                                  | 13<br>(7.7-21.1)    | 16.1<br>(7.5-34.4)  | 12.5<br>(4.7-33.2)  | -5.7<br>(-11.3-0.1)                                                | -2.5<br>(-7.9-2.7) | 2.8<br>(-2.6-8.2) |
| Norway                      | 4<br>(3.7-4.2)                                     | 2.7<br>(2.5-2.8)    | 1.9<br>(1.7-2)      | 1.4<br>(1.2-1.6)    | 4.2<br>(3.3-5)                                                     | 3.6<br>(2.6-4.5)   | 3.2<br>(1.7-4.7)  |
| Oman                        | 16.8<br>(13.9-19.8)                                | 7.6<br>(5.8-9.5)    | 5.4<br>(4-6.8)      | 5.3<br>(3.6-7)      | 8.1<br>(5.7-10.8)                                                  | 3.6<br>(1.5-5.9)   | 0.3<br>(-1.7-2.5) |
| Pakistan                    | 64.1<br>(59.5-68.7)                                | 56.9<br>(53.2-60.7) | 49.9<br>(46.1-53.8) | 41.2<br>(34.6-48.8) | 1.1<br>(0.2-2)                                                     | 1.3<br>(0.5-2.2)   | 2.1<br>(0.4-4)    |
| Palau                       | 18.6<br>(13.4-24.3)                                | 15.9<br>(10.9-21.3) | 12.5<br>(7.2-20.9)  | 9.4<br>(4.2-19.8)   | 1.5<br>(-1.2-4.4)                                                  | 2.3<br>(-2-6.5)    | 3.2<br>(-1.9-8.5) |
| Panama                      | 17.7<br>(14-21.1)                                  | 15.2<br>(10.9-19.1) | 11.5<br>(7.1-17.3)  | 8.6<br>(4.1-16.7)   | 1.5<br>(-0.7-3.9)                                                  | 2.7<br>(-0.4-5.8)  | 3.2<br>(-1.8-8.5) |
| Papua New Guinea            | 33.6<br>(29.4-38)                                  | 30.7<br>(26.8-35.2) | 26.1<br>(21.7-31.3) | 21.9<br>(15.1-31)   | 0.8<br>(-1-2.3)                                                    | 1.6<br>(-0.1-3.4)  | 1.9<br>(-1.2-5.3) |
| Paraguay                    | 21.8<br>(19-25)                                    | 18.1<br>(14.8-22.3) | 14.6<br>(9.5-22.9)  | 10.9<br>(5.5-22.2)  | 1.9<br>(-0.2-3.9)                                                  | 2.1<br>(-1.6-5.5)  | 3.3<br>(-1.8-8.3) |
| Peru                        | 27.9<br>(25.8-30.2)                                | 15.9<br>(14.5-17.3) | 9.6<br>(8.7-10.5)   | 6.4<br>(5-8.1)      | 5.6<br>(4.5-6.6)                                                   | 5.1<br>(3.9-6.3)   | 4.5<br>(2-7)      |
| Philippines                 | 19.3<br>(17.4-21.3)                                | 16.3<br>(14.8-18)   | 15<br>(13.3-16.9)   | 13.3<br>(9.9-17.8)  | 1.8<br>(0.5-3)                                                     | 0.9<br>(-0.5-2.2)  | 1.3<br>(-1.8-4.4) |
| Poland                      | 11.1<br>(10.8-11.5)                                | 5.8<br>(5.6-5.9)    | 3.6<br>(3.5-3.7)    | 2.7<br>(2.6-2.8)    | 6.5<br>(6.1-6.8)                                                   | 4.6<br>(4.2-5)     | 3.1<br>(2.5-3.7)  |
| Portugal                    | 7.3<br>(6.9-7.6)                                   | 3.4<br>(3.2-3.5)    | 2.1<br>(2-2.3)      | 2<br>(1.8-2.2)      | 7.9<br>(7.3-8.6)                                                   | 5.2<br>(4.3-6)     | 0.9<br>(-0.4-2.2) |
| Qatar                       | 11.3<br>(10.1-12.9)                                | 6.6<br>(6-7.2)      | 4.6<br>(4.2-5)      | 3.4<br>(2.9-4)      | 5.5<br>(3.9-7.3)                                                   | 3.7<br>(2.5-4.9)   | 3.4<br>(1.1-5.4)  |
| Republic of Korea           | 7.3<br>(6.4-8.5)                                   | 3.4<br>(3.1-3.7)    | 1.8<br>(1.6-1.9)    | 1.5<br>(1.4-1.7)    | 7.8<br>(6-9.6)                                                     | 7.1<br>(6.1-8.1)   | 1.5<br>(0.3-2.6)  |
| Republic of Moldova         | 18.7<br>(15.8-22.1)                                | 20.7<br>(17-24.9)   | 12.7<br>(10.8-15.3) | 10.7<br>(7.7-14.6)  | -1.8<br>(-4-0.5)                                                   | 5.4<br>(2.7-7.6)   | 1.9<br>(-1.9-6)   |
| Republic of North Macedonia | 17.2<br>(16.1-18.3)                                | 9.1<br>(8.5-9.8)    | 6.6<br>(6.1-7.1)    | 3.9<br>(3.4-4.5)    | 6.3<br>(5.4-7.2)                                                   | 2.8<br>(1.8-3.9)   | 5.8<br>(4-7.7)    |
| Romania                     | 15.8<br>(12.4-20.1)                                | 10.5<br>(8.7-12.3)  | 5.4<br>(4.4-6.4)    | 3.4<br>(2.9-4)      | 3.7<br>(0.5-7.3)                                                   | 6.6<br>(4-9.4)     | 5.1<br>(3.4-6.7)  |
| Russian Federation          | 10.9<br>(7.9-14.3)                                 | 9<br>(7.7-10.3)     | 4.4<br>(3.7-5.1)    | 2.6<br>(2.2-3)      | 1.9<br>(-2.6-6.4)                                                  | 7.5<br>(6.1-8.9)   | 5.8<br>(4.3-7.3)  |
| Rwanda                      | 40.8<br>(36.7-45.1)                                | 40.9<br>(36.2-45.9) | 23.1<br>(19.7-27)   | 15.9<br>(8.9-28)    | -0.4<br>(-1.8-1)                                                   | 5.7<br>(4-7.3)     | 4.2<br>(-1.6-10)  |
| Saint Kitts and Nevis       | 19.3                                               | 16.6                | 11.7                | 10.3                | 1.3                                                                | 3.7                | 1.5               |



|                                     | Neonatal mortality rate<br>(per 1,000 live births) |             |             |             | Average annual rate of reduction in<br>neonatal mortality rate (%) |            |             |
|-------------------------------------|----------------------------------------------------|-------------|-------------|-------------|--------------------------------------------------------------------|------------|-------------|
|                                     | 1990                                               | 2000        | 2010        | 2019        | 1990-1999                                                          | 2000-2009  | 2010-2019   |
|                                     | (17-21.7)                                          | (14.6-18.9) | (10-13.7)   | (7.2-14.8)  | (-0.5-3.1)                                                         | (1.8-5.6)  | (-2.5-5.2)  |
| Saint Lucia                         | 12.1                                               | 11.6        | 13          | 12.7        | 0.6                                                                | -1.1       | 0.2         |
|                                     | (11.1-13.1)                                        | (10.7-12.6) | (11.9-14.1) | (10.6-15.2) | (-0.5-1.8)                                                         | (-2.3-0)   | (-1.8-2.2)  |
| Saint Vincent and the<br>Grenadines | 12.8                                               | 13.2        | 12.5        | 9.1         | -0.3                                                               | 0.4        | 3.5         |
|                                     | (11.5-14.2)                                        | (11.9-14.5) | (11.2-14)   | (7-11.7)    | (-1.8-1.2)                                                         | (-1.2-2)   | (0.6-6.6)   |
| Samoa                               | 16.4                                               | 11.5        | 10.2        | 8.2         | 3.6                                                                | 1.1        | 2.4         |
|                                     | (12.1-21.1)                                        | (7.9-15.2)  | (6.4-14)    | (4.6-13.4)  | (1.5-6)                                                            | (-1.2-3.7) | (-1.5-6.1)  |
| San Marino                          | 7.4                                                | 3           | 1.3         | 0.8         | 8.9                                                                | 8.9        | 5.4         |
|                                     | (5.2-10.8)                                         | (2.1-4.4)   | (0.6-2.2)   | (0.3-1.7)   | (4-14.5)                                                           | (3.5-16.4) | (-0.5-12.3) |
| Sao Tome and Principe               | 26.4                                               | 22.6        | 17.9        | 14.1        | 1.6                                                                | 2.4        | 2.7         |
|                                     | (20.4-33.1)                                        | (17-28)     | (13.3-23.8) | (7.9-24.9)  | (-1.7-5.5)                                                         | (-1.7-5.9) | (-2.4-7.8)  |
| Saudi Arabia                        | 21.6                                               | 12.2        | 6.7         | 3.7         | 5.8                                                                | 6          | 6.6         |
|                                     | (15.2-29.1)                                        | (8.5-15.9)  | (4.2-9.4)   | (2.1-5.7)   | (3.3-8.6)                                                          | (2.9-8.6)  | (3.2-10.9)  |
| Senegal                             | 40                                                 | 37.9        | 26.8        | 22          | 0.4                                                                | 3.5        | 2.2         |
|                                     | (36.9-43.3)                                        | (34.3-41.5) | (24.3-29.5) | (16.9-28.8) | (-0.6-1.4)                                                         | (2.2-4.7)  | (-0.9-5.2)  |
| Serbia                              | 17.2                                               | 7.8         | 4.8         | 3.2         | 8.3                                                                | 5.2        | 4.4         |
|                                     | (15.5-18.7)                                        | (7.3-8.2)   | (4.5-5.1)   | (2.5-4.1)   | (6.9-9.6)                                                          | (4.5-6)    | (1.8-7)     |
| Seychelles                          | 10.9                                               | 8.7         | 8.7         | 8.6         | 2.5                                                                | 0          | 0.1         |
|                                     | (9.7-12.3)                                         | (7.6-9.8)   | (7.6-9.9)   | (6.2-11.7)  | (0.8-4.5)                                                          | (-1.7-1.9) | (-3.4-3.8)  |
| Sierra Leone                        | 52.4                                               | 49.2        | 39.4        | 31.2        | 0.6                                                                | 2.1        | 2.6         |
|                                     | (45.4-60.7)                                        | (43.3-56.3) | (34.6-44.7) | (24.2-39.5) | (-1.4-2.4)                                                         | (0.5-3.9)  | (0.1-5.3)   |
| Singapore                           | 4.1                                                | 1.6         | 1.1         | 0.9         | 9.3                                                                | 3.8        | 2.3         |
|                                     | (3.8-4.3)                                          | (1.5-1.8)   | (1-1.2)     | (0.8-1.1)   | (8.2-10.4)                                                         | (2.3-5.4)  | (0-4.6)     |
| Slovakia                            | 8.7                                                | 5.1         | 3.4         | 2.9         | 5.5                                                                | 4.5        | 1.6         |
|                                     | (8.3-9)                                            | (4.8-5.3)   | (3.2-3.5)   | (2.7-3.1)   | (4.9-6.1)                                                          | (3.8-5.3)  | (0.5-2.7)   |
| Slovenia                            | 5.7                                                | 3.3         | 1.8         | 1.2         | 5.8                                                                | 6          | 4.7         |
|                                     | (5.4-6.1)                                          | (3-3.5)     | (1.6-1.9)   | (1-1.4)     | (4.8-6.9)                                                          | (4.8-7.3)  | (2.5-6.8)   |
| Solomon Islands                     | 14.6                                               | 12.9        | 10.9        | 8.2         | 1.3                                                                | 1.5        | 3.2         |
|                                     | (11.8-18)                                          | (11-15.3)   | (8.7-13.5)  | (4.9-13.1)  | (-1.5-3.9)                                                         | (-0.9-4.4) | (-1.3-8.1)  |
| Somalia                             | 44.8                                               | 44          | 43.2        | 36.9        | 0.3                                                                | 0          | 1.8         |
|                                     | (34.2-58.2)                                        | (32.7-60.8) | (26.3-71.1) | (16.2-80.7) | (-3-3.5)                                                           | (-4.4)     | (-4.1-8)    |
| South Africa                        | 19.6                                               | 14.9        | 11.2        | 11.5        | 2.7                                                                | 2.9        | -0.3        |
|                                     | (16.5-23.2)                                        | (12.7-18.1) | (9.3-12.9)  | (9.2-14.3)  | (-0.1-5.1)                                                         | (0.8-5.9)  | (-3.7-2.7)  |
| South Sudan                         | 64.1                                               | 56          | 42          | 38.6        | 1.3                                                                | 2.8        | 0.9         |
|                                     | (44.8-86.1)                                        | (41.5-73.3) | (26.2-64.5) | (13.6-88.8) | (-3.7-5.7)                                                         | (-2.3-8.2) | (-5.2-8.9)  |
| Spain                               | 4.9                                                | 2.8         | 2.1         | 1.8         | 6                                                                  | 3.2        | 1.8         |
|                                     | (4.7-5.2)                                          | (2.7-3)     | (2-2.2)     | (1.6-2.1)   | (5.6-6.5)                                                          | (2.7-3.7)  | (0.3-3.4)   |
| Sri Lanka                           | 13.4                                               | 9.6         | 6.4         | 4.3         | 2.7                                                                | 3.9        | 4.5         |
|                                     | (12.8-14.1)                                        | (9.2-10)    | (6.1-6.7)   | (3.4-5.3)   | (2.1-3.2)                                                          | (3.4-4.4)  | (1.9-7)     |
| State of Palestine                  | 21.7                                               | 16.5        | 12.8        | 10.7        | 2.8                                                                | 2.6        | 2           |
|                                     | (19.3-24.3)                                        | (14.8-18.3) | (10.8-15.2) | (7.3-15.7)  | (1.4-4.3)                                                          | (0.8-4.4)  | (-1.4-5.2)  |
| Sudan                               | 42.4                                               | 36.9        | 31.7        | 27.2        | 1.4                                                                | 1.6        | 1.7         |
|                                     | (37.9-47.3)                                        | (32.6-41.2) | (27.3-36.8) | (19.5-37.5) | (0.1-2.8)                                                          | (-0.1-3)   | (-1.4-4.8)  |
| Suriname                            | 20.6                                               | 17.2        | 14.8        | 11.2        | 1.9                                                                | 1.4        | 3.1         |
|                                     | (13.1-27.3)                                        | (13.5-21.2) | (11.3-19.3) | (6.9-18)    | (-3.3-5.8)                                                         | (-2.2-4.4) | (-1.3-7.5)  |
| Sweden                              | 3.5                                                | 2.3         | 1.6         | 1.4         | 4.5                                                                | 3.7        | 1.8         |
|                                     | (3.3-3.7)                                          | (2.2-2.5)   | (1.5-1.7)   | (1.3-1.5)   | (3.7-5.2)                                                          | (2.9-4.6)  | (0.6-2.9)   |
| Switzerland                         | 3.9                                                | 3.5         | 3.1         | 2.8         | 1.3                                                                | 1          | 1.4         |
|                                     | (3.7-4.1)                                          | (3.3-3.6)   | (3-3.3)     | (2.4-3.1)   | (0.6-2.1)                                                          | (0.3-1.7)  | (-0.2-3)    |
| Syrian Arab Republic                | 16.2                                               | 12.2        | 10.1        | 10.8        | 2.8                                                                | 2          | -0.7        |
|                                     | (14.1-18.5)                                        | (10.6-14)   | (8.2-12.2)  | (6.1-14.8)  | (1.1-4.6)                                                          | (-0.1-4.3) | (-4.2-4.1)  |
| Tajikistan                          | 30.7                                               | 28.4        | 20.2        | 15          | 0.5                                                                | 3.4        | 3.3         |
|                                     | (25.7-37)                                          | (24.1-33.6) | (17-24.3)   | (8.5-24.7)  | (-2-3.1)                                                           | (0.9-5.6)  | (-2.6-10.1) |
| Thailand                            | 20.5                                               | 12.8        | 8           | 5.3         | 4.6                                                                | 4.8        | 4.5         |
|                                     | (16.1-23.4)                                        | (9.6-15.6)  | (5.6-10.1)  | (3.6-7.3)   | (3-6.4)                                                            | (3.1-6.6)  | (2-6.6)     |
| Timor-Leste                         | 55.3                                               | 36.8        | 24.5        | 19.6        | 4                                                                  | 4.2        | 2.5         |
|                                     | (46.8-65.8)                                        | (31.5-42.5) | (17.2-32.4) | (10.3-35.5) | (1.9-6.3)                                                          | (1.4-7.8)  | (-2.9-7.8)  |
| Togo                                | 43                                                 | 36.2        | 29.2        | 24.8        | 1.7                                                                | 2.2        | 1.8         |
|                                     | (38.4-48.1)                                        | (32.3-40.4) | (25.5-33.3) | (19.1-31.9) | (0.4-3)                                                            | (0.8-3.6)  | (-0.5-4.3)  |

|                                       | Neonatal mortality rate<br>(per 1,000 live births) |                     |                     |                     | Average annual rate of reduction in<br>neonatal mortality rate (%) |                    |                    |
|---------------------------------------|----------------------------------------------------|---------------------|---------------------|---------------------|--------------------------------------------------------------------|--------------------|--------------------|
|                                       | 1990                                               | 2000                | 2010                | 2019                | 1990-1999                                                          | 2000-2009          | 2010-2019          |
| Tonga                                 | 10.3<br>(8-14)                                     | 7.9<br>(6.2-9.8)    | 7.3<br>(5.5-9.2)    | 7.4<br>(5-10.8)     | 2.7<br>(-0.2-6.7)                                                  | 1<br>(-2-4.1)      | -0.2<br>(-4.4-3.8) |
| Trinidad and Tobago                   | 20.2<br>(16.3-24.2)                                | 18.8<br>(13.4-26.6) | 15.3<br>(8.4-29.7)  | 11.5<br>(4.9-27.9)  | 0.7<br>(-2.8-3.6)                                                  | 2<br>(-2.6-6.1)    | 3.2<br>(-2.1-8.6)  |
| Tunisia                               | 27.6<br>(23.6-32.1)                                | 18.8<br>(16-21.9)   | 12.5<br>(11.5-13.4) | 11.9<br>(10.7-13.3) | 3.7<br>(1.8-5.6)                                                   | 4.4<br>(2.5-6.3)   | 0.5<br>(-1.1-2.1)  |
| Turkey                                | 33<br>(29.7-36.6)                                  | 18.7<br>(16.6-20.9) | 9.1<br>(8-10.2)     | 5.3<br>(4.6-6)      | 5.7<br>(4.2-7.2)                                                   | 7.1<br>(5.6-8.8)   | 6<br>(4-7.8)       |
| Turkmenistan                          | 26.8<br>(22.4-32)                                  | 29.7<br>(24.9-35.4) | 22.7<br>(17.6-29.1) | 23.6<br>(16.4-33.2) | -1.4<br>(-3.6-0.8)                                                 | 2.8<br>(-0.1-5.9)  | -0.4<br>(-5-3.9)   |
| Tuvalu                                | 27.7<br>(21.8-34.9)                                | 24.2<br>(20.9-27.8) | 21.1<br>(14.7-30)   | 16<br>(8.5-30.9)    | 1.4<br>(-1.6-4.3)                                                  | 1.2<br>(-2.4-4.9)  | 3.1<br>(-2.1-8.1)  |
| Uganda                                | 38.8<br>(34.7-43.1)                                | 32.1<br>(28.6-35.7) | 25.3<br>(22.5-28.4) | 20<br>(14.6-27.1)   | 1.8<br>(0.5-3.2)                                                   | 2.4<br>(0.8-3.9)   | 2.6<br>(-0.8-6)    |
| Ukraine                               | 12<br>(10.2-14.3)                                  | 11.2<br>(9.4-13.1)  | 7<br>(5.3-8.3)      | 5<br>(3.7-6.2)      | 0.3<br>(-1.9-2.7)                                                  | 4.6<br>(2.2-7.7)   | 3.7<br>(2.3-5.3)   |
| United Arab Emirates                  | 8.3<br>(6.9-10)                                    | 5.9<br>(5.2-6.9)    | 4.5<br>(4.1-5.2)    | 4<br>(3.3-4.8)      | 3.5<br>(1-5.7)                                                     | 2.7<br>(0.9-4.5)   | 1.5<br>(-1-4.2)    |
| United Kingdom                        | 4.5<br>(4.3-4.6)                                   | 3.8<br>(3.7-3.9)    | 3<br>(3-3.1)        | 2.8<br>(2.6-2.9)    | 1.7<br>(1.3-2.1)                                                   | 2.1<br>(1.7-2.5)   | 1<br>(0.3-1.7)     |
| United Republic of<br>Tanzania        | 39.9<br>(36.5-43.7)                                | 33.6<br>(30.7-36.8) | 24.7<br>(22-28)     | 20.3<br>(15-28.1)   | 1.6<br>(0.5-2.7)                                                   | 3.1<br>(1.8-4.5)   | 2.2<br>(-1.1-5.3)  |
| United States of<br>America           | 5.8<br>(5.6-5.9)                                   | 4.6<br>(4.5-4.8)    | 4.1<br>(4-4.2)      | 3.7<br>(3.4-4)      | 2.3<br>(2-2.6)                                                     | 1.2<br>(0.9-1.5)   | 1.1<br>(0.3-2)     |
| Uruguay                               | 12<br>(10.4-13.6)                                  | 8.4<br>(7.8-9.1)    | 4.8<br>(4.4-5.2)    | 4.2<br>(3.8-4.6)    | 3.8<br>(1.8-5.5)                                                   | 5.7<br>(4.7-6.6)   | 1.5<br>(0.1-2.8)   |
| Uzbekistan                            | 30.9<br>(25.8-36.6)                                | 28.1<br>(23.3-33.9) | 18.4<br>(13-24.4)   | 9.9<br>(6.8-13.5)   | 0.8<br>(-1.9-3.4)                                                  | 4.1<br>(1.4-7.5)   | 6.9<br>(3.1-10.7)  |
| Vanuatu                               | 15.9<br>(12.2-21.8)                                | 12.5<br>(9.3-15.7)  | 13<br>(9.2-17.6)    | 11.4<br>(5.8-20.8)  | 2.5<br>(-0.8-7.5)                                                  | -0.4<br>(-4.3-3.3) | 1.5<br>(-4-7.5)    |
| Venezuela (Bolivarian<br>Republic of) | 12.8<br>(12.1-13.6)                                | 11.1<br>(10.5-11.6) | 10.5<br>(10.1-10.9) | 14.6<br>(11.2-18.5) | 1.4<br>(0.8-2)                                                     | 0.9<br>(0.4-1.4)   | -3.6<br>(-6.3-0.7) |
| Viet Nam                              | 23.4<br>(20.6-26.9)                                | 15.4<br>(12.7-18.3) | 12<br>(10.2-13.8)   | 10.5<br>(7.7-14.3)  | 4.2<br>(2-6.8)                                                     | 2.7<br>(0.5-4.7)   | 1.5<br>(-2.2-4.8)  |
| Yemen                                 | 43.3<br>(39.5-47.5)                                | 36.8<br>(33.1-40.9) | 26.8<br>(22.8-31.5) | 26.7<br>(15.8-43.8) | 1.5<br>(0.4-2.6)                                                   | 3.3<br>(1.6-5)     | 0.1<br>(-4.5-5)    |
| Zambia                                | 36<br>(32.6-39.6)                                  | 33.9<br>(30.8-37.4) | 25.7<br>(23.1-28.6) | 23.3<br>(18-30.1)   | 0.5<br>(-0.7-1.6)                                                  | 2.9<br>(1.7-4.2)   | 1.1<br>(-1.7-4)    |
| Zimbabwe                              | 24.6<br>(21.9-27.5)                                | 26.4<br>(23.7-29.3) | 31.7<br>(28.4-35.5) | 25.9<br>(18.8-34.9) | -0.7<br>(-2.2-0.7)                                                 | -2.2<br>(-3.7-0.8) | 2.3<br>(-1.2-5.8)  |

### 3.3. Table A.3 Number of under-5 and neonatal deaths, by country, 1990-2019

Note: Numbers in brackets are 90% uncertainty intervals.

|                                  | Number of under-five deaths |                           |                           |                         | Number of neonatal deaths |                           |                        |                        |
|----------------------------------|-----------------------------|---------------------------|---------------------------|-------------------------|---------------------------|---------------------------|------------------------|------------------------|
|                                  | 1990                        | 2000                      | 2010                      | 2019                    | 1990                      | 2000                      | 2010                   | 2019                   |
| Afghanistan                      | 110011<br>(100845-120093)   | 125079<br>(116331-134873) | 101508<br>(93034-110889)  | 72186<br>(56868-89342)  | 48398<br>(43221-54133)    | 62013<br>(56556-68197)    | 55545<br>(50093-61526) | 43424<br>(33631-54696) |
| Albania                          | 3257<br>(2897-3659)         | 1448<br>(1319-1589)       | 472<br>(457-488)          | 327<br>(306-349)        | 1000<br>(775-1256)        | 625<br>(505-756)          | 237<br>(211-262)       | 251<br>(231-273)       |
| Algeria                          | 41074<br>(38276-43936)      | 24415<br>(23872-24963)    | 23338<br>(22888-23793)    | 23598<br>(22845-24379)  | 19240<br>(17087-21539)    | 12772<br>(11524-14000)    | 15477<br>(14906-16056) | 16484<br>(15790-17185) |
| Andorra                          | 9<br>(2-34)                 | 5<br>(3-11)               | 4<br>(2-8)                | 2<br>(0-6)              | 5<br>(1-19)               | 3<br>(1-6)                | 2<br>(1-4)             | 1<br>(0-3)             |
| Angola                           | 124961<br>(110909-141161)   | 152254<br>(133577-174328) | 122120<br>(84842-169230)  | 92690<br>(43228-172073) | 31778<br>(26046-39242)    | 39789<br>(33129-47772)    | 38656<br>(26246-54820) | 35358<br>(15603-68835) |
| Antigua and Barbuda              | 16<br>(14-18)               | 23<br>(21-25)             | 15<br>(13-17)             | 10<br>(7-14)            | 10<br>(8-11)              | 14<br>(13-16)             | 9<br>(7-10)            | 5<br>(4-8)             |
| Argentina                        | 20533<br>(20153-20915)      | 14077<br>(13819-14345)    | 10679<br>(10477-10881)    | 6977<br>(6633-7346)     | 10796<br>(10458-11140)    | 7865<br>(7625-8110)       | 5689<br>(5512-5871)    | 4583<br>(4299-4885)    |
| Armenia                          | 3732<br>(3389-4116)         | 1241<br>(1116-1368)       | 818<br>(692-938)          | 482<br>(358-621)        | 1684<br>(1463-1962)       | 651<br>(565-744)          | 449<br>(356-554)       | 258<br>(175-366)       |
| Australia                        | 2307<br>(2264-2352)         | 1532<br>(1503-1561)       | 1421<br>(1393-1450)       | 1146<br>(1084-1213)     | 1176<br>(1137-1216)       | 870<br>(842-897)          | 825<br>(798-852)       | 726<br>(679-777)       |
| Austria                          | 841<br>(818-865)            | 449<br>(433-465)          | 338<br>(325-352)          | 306<br>(265-356)        | 410<br>(390-431)          | 248<br>(235-261)          | 197<br>(186-208)       | 184<br>(155-217)       |
| Azerbaijan                       | 19421<br>(17608-21430)      | 10767<br>(9587-12085)     | 5919<br>(4903-7155)       | 3370<br>(2164-5255)     | 6790<br>(5644-8068)       | 4716<br>(3989-5655)       | 3268<br>(2619-4064)    | 1765<br>(1062-2838)    |
| Bahamas                          | 143<br>(136-150)            | 88<br>(83-94)             | 82<br>(77-87)             | 68<br>(53-86)           | 85<br>(78-92)             | 43<br>(39-47)             | 43<br>(39-47)          | 36<br>(27-48)          |
| Bahrain                          | 329<br>(318-340)            | 182<br>(174-191)          | 164<br>(157-173)          | 151<br>(119-193)        | 217<br>(203-231)          | 70<br>(64-77)             | 62<br>(56-69)          | 65<br>(48-87)          |
| Bangladesh                       | 512896<br>(498112-528230)   | 301684<br>(291812-311531) | 152809<br>(147000-158756) | 89796<br>(81574-98812)  | 232185<br>(218701-246586) | 150029<br>(141166-159148) | 88248<br>(83315-93477) | 55542<br>(49459-62101) |
| Barbados                         | 76<br>(71-81)               | 57<br>(53-62)             | 50<br>(46-54)             | 39<br>(27-54)           | 49<br>(45-53)             | 35<br>(32-39)             | 33<br>(30-36)          | 26<br>(18-36)          |
| Belarus                          | 2256<br>(2207-2303)         | 1151<br>(1124-1177)       | 588<br>(570-606)          | 360<br>(327-396)        | 1210<br>(928-1534)        | 533<br>(461-603)          | 202<br>(168-237)       | 133<br>(105-164)       |
| Belgium                          | 1194<br>(1167-1220)         | 663<br>(645-682)          | 563<br>(546-581)          | 424<br>(363-494)        | 550<br>(524-578)          | 336<br>(318-354)          | 297<br>(281-313)       | 249<br>(205-300)       |
| Belize                           | 252<br>(222-286)            | 171<br>(160-182)          | 142<br>(135-149)          | 98<br>(85-113)          | 121<br>(102-143)          | 88<br>(80-98)             | 71<br>(64-78)          | 65<br>(55-77)          |
| Benin                            | 38307<br>(36083-40734)      | 38840<br>(36523-41409)    | 38636<br>(35646-41952)    | 37100<br>(31832-43035)  | 10531<br>(9565-11596)     | 11533<br>(10452-12689)    | 12477<br>(11155-13923) | 12931<br>(10696-15455) |
| Bhutan                           | 2488<br>(2205-2854)         | 1250<br>(1128-1395)       | 569<br>(470-679)          | 369<br>(236-565)        | 832<br>(610-1065)         | 505<br>(417-603)          | 297<br>(233-374)       | 215<br>(127-350)       |
| Bolivia (Plurinational State of) | 28796<br>(27273-30398)      | 19029<br>(17875-20291)    | 10354<br>(9198-11615)     | 6399<br>(4831-8404)     | 9937<br>(9005-10885)      | 7427<br>(6469-8268)       | 5318<br>(4618-6114)    | 3598<br>(2612-4857)    |
| Bosnia and Herzegovina           | 1198<br>(1169-1229)         | 424<br>(409-440)          | 246<br>(235-257)          | 158<br>(133-187)        | 725<br>(694-756)          | 283<br>(270-298)          | 173<br>(164-183)       | 111<br>(92-133)        |
| Botswana                         | 2136<br>(1801-2557)         | 3248<br>(2614-4504)       | 1902<br>(1101-3181)       | 2320<br>(845-4862)      | 749<br>(589-943)          | 278<br>(196-408)          | 578<br>(294-1054)      | 999<br>(320-2261)      |
| Brazil                           | 232778<br>(217103-249453)   | 122065<br>(114257-130622) | 56301<br>(54738-57883)    | 40429<br>(33847-47989)  | 93557<br>(82038-105268)   | 63185<br>(54586-71233)    | 33515<br>(31751-35362) | 22736<br>(18638-27579) |
| Brunei Darussalam                | 99<br>(94-105)              | 78<br>(74-84)             | 65<br>(61-70)             | 73<br>(64-82)           | 43<br>(38-48)             | 38<br>(34-42)             | 33<br>(30-36)          | 38<br>(32-44)          |
| Bulgaria                         | 2011<br>(1963-2059)         | 1155<br>(1124-1186)       | 804<br>(779-830)          | 422<br>(395-450)        | 846<br>(812-881)          | 511<br>(488-535)          | 377<br>(359-396)       | 206<br>(190-223)       |
| Burkina Faso                     | 79061                       | 91457                     | 77477                     | 64744                   | 19054                     | 21982                     | 20438                  | 19767                  |

|                                       | Number of under-five deaths |                 |                 |                 | Number of neonatal deaths |                 |                 |                |
|---------------------------------------|-----------------------------|-----------------|-----------------|-----------------|---------------------------|-----------------|-----------------|----------------|
|                                       | 1990                        | 2000            | 2010            | 2019            | 1990                      | 2000            | 2010            | 2019           |
|                                       | (74061-84404)               | (85252-97962)   | (69746-85798)   | (47418-89259)   | (16914-21366)             | (19391-24679)   | (16729-24511)   | (12652-29582)  |
| Burundi                               | 45577                       | 42075           | 32091           | 24412           | 10770                     | 10270           | 10354           | 9288           |
|                                       | (41522-50131)               | (38333-46286)   | (27888-36813)   | (16185-36590)   | (9276-12387)              | (8861-11775)    | (8704-12269)    | (6015-14296)   |
| Cabo Verde                            | 834                         | 455             | 290             | 157             | 279                       | 208             | 169             | 94             |
|                                       | (804-864)                   | (442-469)       | (278-301)       | (130-190)       | (243-315)                 | (183-236)       | (155-185)       | (75-118)       |
| Cambodia                              | 44081                       | 36125           | 15904           | 9647            | 15342                     | 11980           | 7748            | 5257           |
|                                       | (40860-47671)               | (33197-39397)   | (13374-18916)   | (5090-18201)    | (13776-17162)             | (10612-13507)   | (6417-9367)     | (2730-10125)   |
| Cameroon                              | 68727                       | 88571           | 85244           | 66071           | 21190                     | 22647           | 25004           | 23557          |
|                                       | (64112-73634)               | (82298-95493)   | (77717-93409)   | (54455-79419)   | (18995-23501)             | (20010-25356)   | (21995-28280)   | (18451-29830)  |
| Canada                                | 3152                        | 2089            | 2118            | 1873            | 1678                      | 1240            | 1420            | 1285           |
|                                       | (3099-3210)                 | (2051-2126)     | (2081-2155)     | (1748-2002)     | (1626-1731)               | (1203-1278)     | (1383-1458)     | (1184-1391)    |
| Central African Republic              | 20246                       | 24446           | 24497           | 18095           | 6185                      | 7426            | 7896            | 6646           |
|                                       | (18140-22644)               | (21785-27386)   | (19037-31983)   | (10540-31113)   | (5350-7186)               | (6033-9135)     | (5640-11024)    | (3694-12177)   |
| Chad                                  | 60310                       | 74268           | 79352           | 73024           | 15776                     | 18979           | 21245           | 22123          |
|                                       | (56012-64993)               | (68892-80409)   | (71492-88297)   | (55545-96532)   | (14002-17796)             | (16730-21454)   | (18259-24678)   | (15599-30991)  |
| Chile                                 | 5597                        | 2814            | 2159            | 1612            | 2544                      | 1450            | 1324            | 1044           |
|                                       | (5477-5718)                 | (2754-2875)     | (2114-2208)     | (1236-2090)     | (2437-2653)               | (1393-1507)     | (1279-1371)     | (779-1398)     |
| China                                 | 1378848                     | 652138          | 274277          | 132256          | 744617                    | 368525          | 147011          | 63895          |
|                                       | (1268159-1504390)           | (615720-693869) | (258490-290978) | (115661-151885) | (660009-841243)           | (337973-400917) | (133862-160300) | (53379-75611)  |
| Colombia                              | 31152                       | 22041           | 14068           | 10091           | 15899                     | 11900           | 7600            | 5482           |
|                                       | (29011-33393)               | (20313-23849)   | (12305-16029)   | (7093-14230)    | (14585-17332)             | (10817-13120)   | (6496-8879)     | (3779-7869)    |
| Comoros                               | 2117                        | 1983            | 1997            | 1656            | 869                       | 826             | 881             | 797            |
|                                       | (1873-2367)                 | (1599-2337)     | (1266-3258)     | (808-3510)      | (722-1033)                | (525-1132)      | (420-1639)      | (297-1880)     |
| Congo                                 | 7821                        | 13102           | 9487            | 8204            | 2428                      | 3698            | 3523            | 3369           |
|                                       | (6864-8879)                 | (11789-14555)   | (8194-10954)    | (4901-14177)    | (2070-2843)               | (3197-4269)     | (2960-4177)     | (1943-5945)    |
| Cook Islands                          | 14                          | 8               | 4               | 2               | 8                         | 4               | 2               | 1              |
|                                       | (12-15)                     | (7-9)           | (3-5)           | (1-3)           | (6-10)                    | (3-6)           | (1-3)           | (1-2)          |
| Costa Rica                            | 1433                        | 1011            | 753             | 599             | 769                       | 587             | 480             | 425            |
|                                       | (1405-1464)                 | (988-1035)      | (734-773)       | (571-630)       | (730-807)                 | (559-614)       | (457-502)       | (401-452)      |
| Cote d'Ivoire                         | 75180                       | 91945           | 79631           | 70330           | 25151                     | 30334           | 29892           | 30156          |
|                                       | (70199-80539)               | (85481-98958)   | (72000-87712)   | (56077-88277)   | (22533-27879)             | (27086-33921)   | (25721-34110)   | (22996-39007)  |
| Croatia                               | 710                         | 382             | 234             | 176             | 438                       | 251             | 152             | 105            |
|                                       | (690-729)                   | (370-396)       | (224-244)       | (159-196)       | (417-459)                 | (238-265)       | (143-162)       | (90-121)       |
| Cuba                                  | 2374                        | 1295            | 792             | 591             | 1191                      | 624             | 361             | 246            |
|                                       | (2182-2569)                 | (1186-1406)     | (727-861)       | (506-704)       | (1091-1296)               | (568-682)       | (329-396)       | (209-297)      |
| Cyprus                                | 164                         | 83              | 45              | 29              | 91                        | 45              | 26              | 16             |
|                                       | (154-175)                   | (77-90)         | (40-50)         | (20-42)         | (76-105)                  | (39-52)         | (22-30)         | (11-24)        |
| Czechia                               | 1555                        | 489             | 378             | 350             | 921                       | 239             | 189             | 179            |
|                                       | (1523-1590)                 | (471-507)       | (364-393)       | (328-374)       | (883-961)                 | (224-254)       | (177-202)       | (163-195)      |
| Democratic People's Republic of Korea | 17956                       | 24921           | 10226           | 6116            | 8970                      | 10858           | 5575            | 3376           |
|                                       | (14078-22986)               | (19566-31847)   | (8028-13102)    | (4797-7834)     | (6100-12626)              | (6710-16284)    | (3451-8194)     | (1991-5034)    |
| Democratic Republic of the Congo      | 282491                      | 331074          | 319024          | 290859          | 67152                     | 83892           | 94325           | 96760          |
|                                       | (254988-311342)             | (300983-366445) | (264964-377367) | (187364-439624) | (57342-77959)             | (71721-97268)   | (74603-115942)  | (58228-154141) |
| Denmark                               | 543                         | 376             | 255             | 232             | 272                       | 230             | 175             | 187            |
|                                       | (527-563)                   | (363-391)       | (243-267)       | (214-251)       | (256-289)                 | (217-244)       | (165-186)       | (155-214)      |
| Djibouti                              | 2516                        | 2254            | 1623            | 1173            | 1103                      | 986             | 796             | 623            |
|                                       | (2162-2922)                 | (1933-2661)     | (1266-2070)     | (693-1910)      | (914-1327)                | (805-1197)      | (605-1045)      | (357-1063)     |
| Dominica                              | 26                          | 21              | 22              | 33              | 16                        | 16              | 17              | 27             |
|                                       | (24-27)                     | (20-23)         | (20-24)         | (30-41)         | (15-18)                   | (14-17)         | (16-19)         | (23-32)        |
| Dominican Republic                    | 12502                       | 8518            | 7051            | 5768            | 5155                      | 4908            | 4721            | 3989           |
|                                       | (11733-13321)               | (7851-9212)     | (6073-8172)     | (3998-8387)     | (4665-5669)               | (4459-5393)     | (4003-5539)     | (2709-5884)    |
| Ecuador                               | 16173                       | 9293            | 5854            | 4696            | 6796                      | 4675            | 2978            | 2379           |

|                   | Number of under-five deaths |                   |                   |                 | Number of neonatal deaths |                   |                 |                 |
|-------------------|-----------------------------|-------------------|-------------------|-----------------|---------------------------|-------------------|-----------------|-----------------|
|                   | 1990                        | 2000              | 2010              | 2019            | 1990                      | 2000              | 2010            | 2019            |
|                   | (14642-17849)               | (8258-10460)      | (5155-6655)       | (4278-5141)     | (5829-7816)               | (4026-5399)       | (2543-3469)     | (2102-2676)     |
| Egypt             | 158216                      | 82642             | 62792             | 52291           | 61843                     | 39847             | 36190           | 28710           |
|                   | (150901-166200)             | (77348-87895)     | (55903-70720)     | (36884-75075)   | (57404-66578)             | (36661-43248)     | (31730-41222)   | (19792-41788)   |
| El Salvador       | 9753                        | 4893              | 2344              | 1552            | 3697                      | 2166              | 1142            | 765             |
|                   | (8917-10634)                | (4401-5424)       | (1899-2886)       | (992-2425)      | (3257-4252)               | (1874-2464)       | (908-1443)      | (472-1252)      |
| Equatorial Guinea | 2973                        | 3685              | 3782              | 3519            | 848                       | 1111              | 1242            | 1289            |
|                   | (2629-3350)                 | (3300-4200)       | (2988-4709)       | (2121-5766)     | (656-1093)                | (901-1383)        | (879-1677)      | (660-2333)      |
| Eritrea           | 13887                       | 6371              | 6172              | 4247            | 3172                      | 2047              | 2465            | 1863            |
|                   | (12766-15131)               | (5835-6943)       | (5185-7350)       | (2569-7032)     | (2735-3623)               | (1794-2315)       | (2016-3045)     | (1074-3205)     |
| Estonia           | 386                         | 140               | 69                | 33              | 206                       | 67                | 32              | 14              |
|                   | (372-400)                   | (133-147)         | (64-74)           | (28-39)         | (192-219)                 | (61-73)           | (29-36)         | (12-18)         |
| Eswatini          | 2125                        | 3524              | 2810              | 1468            | 686                       | 695               | 641             | 548             |
|                   | (1884-2382)                 | (3186-3895)       | (2396-3290)       | (974-2206)      | (577-808)                 | (602-800)         | (523-785)       | (339-863)       |
| Ethiopia          | 432253                      | 392688            | 252415            | 177849          | 134342                    | 139801            | 119835          | 98795           |
|                   | (402465-464882)             | (366419-421366)   | (232170-274505)   | (145985-215961) | (120398-149406)           | (125597-154390)   | (107380-133501) | (80029-122189)  |
| Fiji              | 616                         | 455               | 448               | 482             | 260                       | 182               | 183             | 202             |
|                   | (523-727)                   | (433-477)         | (432-466)         | (431-540)       | (204-328)                 | (162-202)         | (162-205)       | (168-242)       |
| Finland           | 428                         | 249               | 180               | 122             | 247                       | 142               | 100             | 70              |
|                   | (413-444)                   | (239-259)         | (171-188)         | (111-135)       | (234-260)                 | (134-151)         | (93-106)        | (62-79)         |
| France            | 6773                        | 4029              | 3402              | 3251            | 2705                      | 2076              | 1814            | 1920            |
|                   | (6634-6914)                 | (3948-4115)       | (3336-3473)       | (3082-3446)     | (2598-2818)               | (2000-2154)       | (1748-1880)     | (1773-2087)     |
| Gabon             | 3150                        | 3359              | 3184              | 2807            | 1108                      | 1166              | 1346            | 1359            |
|                   | (2708-3651)                 | (2906-3951)       | (2602-3836)       | (1762-4469)     | (912-1336)                | (967-1419)        | (1057-1693)     | (821-2230)      |
| Gambia            | 6874                        | 6080              | 5130              | 4504            | 2036                      | 2121              | 2414            | 2427            |
|                   | (6207-7632)                 | (5540-6675)       | (4582-5716)       | (3778-5341)     | (1563-2511)               | (1759-2467)       | (2057-2841)     | (1943-3027)     |
| Georgia           | 4432                        | 2035              | 794               | 513             | 2269                      | 1204              | 574             | 258             |
|                   | (3983-4949)                 | (1794-2345)       | (743-850)         | (441-604)       | (1984-2593)               | (1040-1408)       | (530-621)       | (216-310)       |
| Germany           | 7130                        | 4053              | 2821              | 2959            | 2786                      | 2074              | 1559            | 1788            |
|                   | (7005-7264)                 | (3982-4125)       | (2770-2871)       | (2829-3100)     | (2679-2894)               | (2004-2143)       | (1506-1611)     | (1677-1905)     |
| Ghana             | 72554                       | 66595             | 53890             | 40168           | 25012                     | 24858             | 23883           | 20399           |
|                   | (68666-76648)               | (62857-70380)     | (50056-57919)     | (32278-49574)   | (22890-27249)             | (22698-26923)     | (21751-26229)   | (16164-25615)   |
| Greece            | 1126                        | 686               | 419               | 302             | 692                       | 421               | 226             | 178             |
|                   | (1097-1156)                 | (664-709)         | (403-436)         | (266-341)       | (666-718)                 | (402-440)         | (213-239)       | (154-204)       |
| Grenada           | 65                          | 30                | 28                | 30              | 34                        | 15                | 17              | 20              |
|                   | (60-69)                     | (27-33)           | (25-31)           | (25-37)         | (31-38)                   | (13-17)           | (15-19)         | (16-25)         |
| Guatemala         | 28205                       | 21123             | 14005             | 10364           | 10169                     | 8745              | 6575            | 5180            |
|                   | (26553-29968)               | (19607-22758)     | (12563-15644)     | (8046-13247)    | (9202-11167)              | (7868-9664)       | (5744-7476)     | (3904-6782)     |
| Guinea            | 66821                       | 57583             | 46599             | 44114           | 18587                     | 16520             | 14072           | 13960           |
|                   | (62435-71392)               | (53718-61642)     | (42716-51007)     | (36976-53009)   | (16516-20800)             | (14644-18552)     | (12274-16075)   | (10566-18211)   |
| Guinea-Bissau     | 9752                        | 8454              | 6514              | 5111            | 2886                      | 2759              | 2638            | 2329            |
|                   | (8702-10905)                | (7629-9407)       | (5398-7888)       | (3224-7800)     | (2450-3363)               | (2370-3189)       | (2134-3279)     | (1410-3704)     |
| Guyana            | 1282                        | 908               | 595               | 453             | 647                       | 516               | 358             | 287             |
|                   | (1161-1423)                 | (818-1008)        | (476-745)         | (281-733)       | (561-740)                 | (450-591)         | (280-459)       | (175-477)       |
| Haiti             | 37390                       | 27498             | 58767             | 16890           | 10148                     | 8000              | 8474            | 6827            |
|                   | (34966-39977)               | (25343-29650)     | (52566-66029)     | (12803-22616)   | (8855-11530)              | (6964-9120)       | (7370-9737)     | (4729-9740)     |
| Honduras          | 10811                       | 8145              | 4877              | 3480            | 4176                      | 3857              | 2654            | 1907            |
|                   | (9986-11695)                | (7454-8916)       | (4233-5619)       | (2309-5207)     | (3656-4690)               | (3447-4318)       | (2227-3173)     | (1217-2995)     |
| Hungary           | 2139                        | 990               | 557               | 335             | 1384                      | 552               | 311             | 182             |
|                   | (2090-2189)                 | (961-1018)        | (537-578)         | (294-381)       | (1340-1430)               | (529-576)         | (295-328)       | (157-211)       |
| Iceland           | 28                          | 17                | 12                | 8               | 15                        | 9                 | 6               | 4               |
|                   | (26-31)                     | (15-19)           | (10-14)           | (6-11)          | (14-17)                   | (7-10)            | (5-7)           | (3-6)           |
| India             | 3419688                     | 2532713           | 1527855           | 824448          | 1579257                   | 1254908           | 832286          | 522249          |
|                   | (3306718-3541320)           | (2436908-2630588) | (1456287-1606111) | (737541-912680) | (1498204-1666710)         | (1187315-1324747) | (781864-884340) | (463296-581137) |
| Indonesia         | 392965                      | 236672            | 169428            | 114994          | 143435                    | 104919            | 87474           | 59591           |

|                                  | Number of under-five deaths |                           |                        |                        | Number of neonatal deaths |                        |                        |                        |
|----------------------------------|-----------------------------|---------------------------|------------------------|------------------------|---------------------------|------------------------|------------------------|------------------------|
|                                  | 1990                        | 2000                      | 2010                   | 2019                   | 1990                      | 2000                   | 2010                   | 2019                   |
|                                  | (375095-412522)             | (224865-249469)           | (157161-183262)        | (96549-138932)         | (132970-154309)           | (97174-112746)         | (80052-95630)          | (49081-72909)          |
| Iran (Islamic Republic of)       | 103324<br>(95498-112402)    | 40392<br>(36542-44849)    | 25904<br>(21941-30598) | 21248<br>(13160-34592) | 45514<br>(32417-55935)    | 21810<br>(18191-25680) | 16408<br>(12822-21090) | 13075<br>(7351-22922)  |
| Iraq                             | 34488<br>(31550-37647)      | 36067<br>(32977-39478)    | 34217<br>(30223-38755) | 28801<br>(22213-36957) | 17260<br>(15360-19215)    | 19821<br>(17873-22142) | 19950<br>(17367-22973) | 17203<br>(13124-22438) |
| Ireland                          | 493<br>(475-512)            | 387<br>(372-403)          | 298<br>(286-311)       | 203<br>(172-236)       | 246<br>(232-260)          | 222<br>(210-235)       | 179<br>(169-190)       | 128<br>(107-151)       |
| Israel                           | 1138<br>(1112-1166)         | 849<br>(828-871)          | 696<br>(677-715)       | 624<br>(591-659)       | 623<br>(598-649)          | 452<br>(432-472)       | 373<br>(356-391)       | 329<br>(306-354)       |
| Italy                            | 5429<br>(5326-5534)         | 2964<br>(2909-3020)       | 2226<br>(2184-2270)    | 1432<br>(1321-1553)    | 3594<br>(3501-3691)       | 1847<br>(1796-1900)    | 1342<br>(1302-1383)    | 858<br>(774-950)       |
| Jamaica                          | 1871<br>(1601-2213)         | 1258<br>(1086-1458)       | 910<br>(700-1208)      | 652<br>(376-1138)      | 1235<br>(972-1528)        | 946<br>(798-1122)      | 652<br>(478-889)       | 461<br>(251-843)       |
| Japan                            | 8358<br>(8207-8512)         | 5295<br>(5196-5395)       | 3547<br>(3476-3619)    | 2343<br>(2232-2461)    | 3281<br>(3168-3393)       | 2061<br>(1989-2134)    | 1211<br>(1163-1261)    | 782<br>(726-842)       |
| Jordan                           | 4465<br>(4169-4762)         | 4305<br>(3990-4655)       | 4142<br>(3641-4712)    | 3355<br>(2512-4494)    | 2538<br>(2298-2782)       | 2622<br>(2376-2903)    | 2513<br>(2151-2924)    | 1974<br>(1419-2729)    |
| Kazakhstan                       | 19971<br>(18128-21978)      | 10050<br>(9174-10983)     | 7300<br>(7138-7466)    | 3976<br>(3836-4124)    | 8536<br>(7410-9755)       | 5372<br>(4707-6110)    | 4343<br>(4102-4578)    | 1757<br>(1624-1894)    |
| Kenya                            | 100018<br>(93856-106737)    | 120720<br>(112277-130204) | 84323<br>(76109-93469) | 63623<br>(47100-87435) | 27830<br>(24827-30887)    | 36541<br>(32827-40504) | 36195<br>(31667-41068) | 31343<br>(22353-44268) |
| Kiribati                         | 244<br>(211-282)            | 182<br>(161-206)          | 190<br>(150-241)       | 164<br>(95-279)        | 93<br>(72-120)            | 74<br>(60-92)          | 78<br>(51-108)         | 72<br>(33-133)         |
| Kuwait                           | 825<br>(799-852)            | 540<br>(523-556)          | 596<br>(580-614)       | 448<br>(406-496)       | 468<br>(437-506)          | 290<br>(273-307)       | 322<br>(305-341)       | 251<br>(221-286)       |
| Kyrgyzstan                       | 8821<br>(7822-9952)         | 5327<br>(4743-5821)       | 4119<br>(3997-4230)    | 2824<br>(2693-2985)    | 3315<br>(2744-3939)       | 2166<br>(1810-2523)    | 2505<br>(2271-2732)    | 1880<br>(1569-2183)    |
| Lao People's Democratic Republic | 26757<br>(24639-29059)      | 18262<br>(16790-19949)    | 11310<br>(9938-12843)  | 7520<br>(5580-9864)    | 8632<br>(7697-9698)       | 6470<br>(5796-7267)    | 4802<br>(4137-5570)    | 3637<br>(2629-4903)    |
| Latvia                           | 640<br>(619-663)            | 278<br>(264-292)          | 174<br>(163-185)       | 74<br>(58-93)          | 301<br>(281-321)          | 138<br>(127-149)       | 93<br>(85-101)         | 37<br>(29-49)          |
| Lebanon                          | 2497<br>(2236-2791)         | 1675<br>(1417-1986)       | 849<br>(540-1274)      | 839<br>(419-1617)      | 1634<br>(1415-1878)       | 980<br>(751-1218)      | 514<br>(288-821)       | 485<br>(203-1003)      |
| Lesotho                          | 5054<br>(4582-5604)         | 6523<br>(5981-7102)       | 5691<br>(5049-6402)    | 4831<br>(3326-6954)    | 2304<br>(2015-2628)       | 2291<br>(2056-2540)    | 2358<br>(2042-2717)    | 2401<br>(1594-3567)    |
| Liberia                          | 24731<br>(22735-27005)      | 20532<br>(19072-22166)    | 14009<br>(12752-15390) | 13365<br>(10474-17124) | 5548<br>(4782-6400)       | 5343<br>(4663-6073)    | 4714<br>(4107-5367)    | 5239<br>(3959-6947)    |
| Libya                            | 5447<br>(4653-6378)         | 3258<br>(3076-3450)       | 2215<br>(1970-2491)    | 1448<br>(899-2303)     | 2730<br>(2286-3261)       | 1844<br>(1566-2198)    | 1266<br>(978-1616)     | 803<br>(456-1365)      |
| Lithuania                        | 832<br>(801-862)            | 375<br>(357-395)          | 191<br>(179-203)       | 106<br>(93-120)        | 429<br>(402-458)          | 151<br>(138-165)       | 91<br>(82-101)         | 58<br>(49-68)          |
| Luxembourg                       | 40<br>(37-44)               | 25<br>(23-28)             | 17<br>(15-19)          | 18<br>(14-23)          | 20<br>(17-22)             | 13<br>(11-15)          | 9<br>(8-10)            | 9<br>(7-13)            |
| Madagascar                       | 76971<br>(71902-82551)      | 67044<br>(62133-72381)    | 49789<br>(44462-55524) | 43110<br>(34379-54400) | 20099<br>(18027-22452)    | 20116<br>(18022-22357) | 17910<br>(15623-20528) | 17607<br>(13636-22750) |
| Malawi                           | 100072<br>(94410-105943)    | 80433<br>(75810-85464)    | 48615<br>(44347-53500) | 25712<br>(16713-37565) | 21395<br>(19167-23676)    | 18821<br>(16847-20794) | 16536<br>(14699-18664) | 12469<br>(7995-18795)  |
| Malaysia                         | 8266<br>(8052-8481)         | 5253<br>(5155-5352)       | 3878<br>(3807-3951)    | 4513<br>(4296-4747)    | 3862<br>(3318-4463)       | 2501<br>(2214-2823)    | 2022<br>(1847-2191)    | 2448<br>(2208-2696)    |
| Maldives                         | 783<br>(716-859)            | 243<br>(220-267)          | 99<br>(94-105)         | 54<br>(47-61)          | 360<br>(287-435)          | 132<br>(112-152)       | 56<br>(49-63)          | 34<br>(29-41)          |
| Mali                             | 91308<br>(86010-96891)      | 94723<br>(89104-100885)   | 87037<br>(80406-94560) | 73632<br>(59576-91137) | 27654<br>(24967-30707)    | 27196<br>(24460-30217) | 27030<br>(23891-30475) | 25958<br>(19762-33629) |
| Malta                            | 62<br>(58-66)               | 34<br>(31-37)             | 27<br>(24-29)          | 30<br>(24-38)          | 41<br>(38-45)             | 22<br>(20-24)          | 18<br>(16-20)          | 20<br>(16-26)          |
| Marshall Islands                 | 98<br>(84-115)              | 76<br>(66-89)             | 65<br>(54-79)          | 44<br>(27-70)          | 39<br>(31-49)             | 34<br>(28-42)          | 29<br>(21-39)          | 21<br>(12-36)          |

|                                     | Number of under-five deaths |                           |                           |                            | Number of neonatal deaths |                           |                           |                           |
|-------------------------------------|-----------------------------|---------------------------|---------------------------|----------------------------|---------------------------|---------------------------|---------------------------|---------------------------|
|                                     | 1990                        | 2000                      | 2010                      | 2019                       | 1990                      | 2000                      | 2010                      | 2019                      |
| Mauritania                          | 9295<br>(8377-10295)        | 10903<br>(9689-12285)     | 11849<br>(8168-17196)     | 10699<br>(5541-20412)      | 3795<br>(3297-4389)       | 4318<br>(3637-5079)       | 4895<br>(3172-7541)       | 4820<br>(2337-9706)       |
| Mauritius                           | 505<br>(483-529)            | 381<br>(361-401)          | 224<br>(210-239)          | 206<br>(186-228)           | 325<br>(308-344)          | 249<br>(234-265)          | 140<br>(129-151)          | 130<br>(117-147)          |
| Mexico                              | 108864<br>(101435-116897)   | 66468<br>(61706-71458)    | 43652<br>(41386-46247)    | 31368<br>(28454-34503)     | 53599<br>(48097-59371)    | 33505<br>(30106-37108)    | 20569<br>(19162-22119)    | 18906<br>(16951-21068)    |
| Micronesia<br>(Federated States of) | 179<br>(144-223)            | 172<br>(117-253)          | 100<br>(51-194)           | 75<br>(31-185)             | 81<br>(56-114)            | 77<br>(44-128)            | 49<br>(22-105)            | 41<br>(15-108)            |
| Monaco                              | 3<br>(3-3)                  | 2<br>(2-2)                | 2<br>(2-2)                | 2<br>(1-2)                 | 2<br>(1-2)                | 1<br>(1-1)                | 1<br>(1-1)                | 1<br>(0-1)                |
| Mongolia                            | 7607<br>(7010-8277)         | 3094<br>(2835-3367)       | 1937<br>(1883-1994)       | 1183<br>(1142-1226)        | 2070<br>(1799-2369)       | 1089<br>(948-1239)        | 784<br>(728-844)          | 611<br>(571-651)          |
| Montenegro                          | 170<br>(161-178)            | 121<br>(114-127)          | 52<br>(48-56)             | 17<br>(14-21)              | 110<br>(100-120)          | 74<br>(66-80)             | 34<br>(30-38)             | 10<br>(7-12)              |
| Morocco                             | 57460<br>(53532-61683)      | 31607<br>(28737-34676)    | 21494<br>(18932-24280)    | 14511<br>(10954-19117)     | 26097<br>(23682-28676)    | 17206<br>(15398-19242)    | 13741<br>(11909-15827)    | 9187<br>(6831-12280)      |
| Mozambique                          | 140673<br>(130058-152811)   | 127995<br>(118489-138312) | 97698<br>(88497-107972)   | 81507<br>(57433-119361)    | 37238<br>(33437-41652)    | 36753<br>(33153-40728)    | 32337<br>(28234-36810)    | 32259<br>(22260-47831)    |
| Myanmar                             | 130235<br>(119555-142698)   | 100470<br>(92778-108964)  | 64480<br>(55915-73747)    | 41896<br>(29188-58635)     | 53719<br>(46418-62998)    | 42752<br>(37656-48276)    | 28284<br>(23500-33384)    | 21134<br>(13909-30840)    |
| Namibia                             | 3769<br>(3433-4154)         | 4181<br>(3767-4679)       | 3104<br>(2526-3866)       | 2954<br>(1731-5369)        | 1494<br>(1312-1700)       | 1248<br>(1109-1422)       | 1295<br>(1023-1638)       | 1343<br>(758-2514)        |
| Nauru                               | 17<br>(11-28)               | 14<br>(12-16)             | 12<br>(9-16)              | 9<br>(5-17)                | 9<br>(5-15)               | 8<br>(7-10)               | 8<br>(5-11)               | 6<br>(3-11)               |
| Nepal                               | 98952<br>(92915-105331)     | 61174<br>(57222-65507)    | 28667<br>(25928-31686)    | 17296<br>(13258-22837)     | 42695<br>(39093-46464)    | 30395<br>(27954-33119)    | 16603<br>(14849-18538)    | 11128<br>(8447-14827)     |
| Netherlands                         | 1582<br>(1554-1611)         | 1217<br>(1194-1243)       | 811<br>(792-830)          | 696<br>(667-728)           | 884<br>(853-915)          | 756<br>(730-782)          | 506<br>(487-525)          | 446<br>(422-471)          |
| New Zealand                         | 631<br>(615-648)            | 413<br>(400-426)          | 387<br>(375-401)          | 283<br>(242-325)           | 250<br>(235-265)          | 195<br>(184-207)          | 205<br>(193-217)          | 157<br>(127-189)          |
| Nicaragua                           | 9944<br>(9229-10695)        | 5286<br>(4787-5816)       | 3264<br>(2911-3572)       | 2212<br>(1927-2590)        | 3430<br>(3044-3843)       | 2257<br>(1955-2563)       | 1860<br>(1616-2121)       | 1352<br>(1160-1595)       |
| Niger                               | 137305<br>(128558-146618)   | 127077<br>(118014-136923) | 94589<br>(81292-109051)   | 81635<br>(52383-126519)    | 24379<br>(21723-27322)    | 26194<br>(23099-29578)    | 25077<br>(20487-30262)    | 25861<br>(15886-41560)    |
| Nigeria                             | 847558<br>(792474-903271)   | 921271<br>(866360-977885) | 857975<br>(787673-933600) | 857899<br>(674948-1117668) | 209193<br>(187632-232226) | 244605<br>(220477-269484) | 249215<br>(221108-279805) | 269897<br>(206717-359081) |
| Niue                                | 1<br>(1-1)                  | 1<br>(1-1)                | 1<br>(0-2)                | 1<br>(0-2)                 | 0<br>(0-1)                | 0<br>(0-1)                | 0<br>(0-1)                | 0<br>(0-1)                |
| Norway                              | 496<br>(480-513)            | 283<br>(271-295)          | 196<br>(186-205)          | 145<br>(132-159)           | 231<br>(218-245)          | 155<br>(146-165)          | 112<br>(105-120)          | 83<br>(74-93)             |
| Oman                                | 2710<br>(2377-3092)         | 932<br>(819-1068)         | 772<br>(750-796)          | 1034<br>(931-1147)         | 1176<br>(977-1390)        | 421<br>(324-526)          | 371<br>(275-464)          | 477<br>(330-635)          |
| Pakistan                            | 594968<br>(573624-618001)   | 520226<br>(497821-542755) | 460168<br>(432339-489531) | 399418<br>(342642-465183)  | 284059<br>(263626-304280) | 280411<br>(262210-299105) | 269460<br>(249030-290251) | 248342<br>(208335-294149) |
| Palau                               | 12<br>(10-14)               | 9<br>(8-11)               | 6<br>(4-9)                | 4<br>(2-8)                 | 7<br>(5-9)                | 5<br>(3-7)                | 3<br>(2-5)                | 2<br>(1-5)                |
| Panama                              | 1977<br>(1736-2209)         | 1826<br>(1573-2095)       | 1514<br>(1087-2098)       | 1175<br>(644-2146)         | 1151<br>(908-1371)        | 1080<br>(772-1357)        | 883<br>(544-1329)         | 680<br>(328-1326)         |
| Papua New Guinea                    | 13272<br>(12089-14515)      | 13656<br>(12283-15219)    | 12368<br>(10529-14535)    | 10393<br>(7491-14257)      | 5403<br>(4726-6108)       | 6091<br>(5320-6979)       | 5716<br>(4749-6851)       | 5160<br>(3555-7287)       |
| Paraguay                            | 6311<br>(5677-7017)         | 4840<br>(4050-5800)       | 3645<br>(2463-5550)       | 2774<br>(1467-5488)        | 3085<br>(2684-3534)       | 2602<br>(2116-3196)       | 2048<br>(1338-3218)       | 1555<br>(783-3185)        |
| Peru                                | 53823<br>(51162-56653)      | 23759<br>(22394-25189)    | 12031<br>(11234-12890)    | 7563<br>(6135-9418)        | 18905<br>(17452-20464)    | 9793<br>(8945-10668)      | 5728<br>(5234-6267)       | 3653<br>(2882-4667)       |



|                                  | Number of under-five deaths |                        |                         |                         | Number of neonatal deaths |                        |                        |                        |
|----------------------------------|-----------------------------|------------------------|-------------------------|-------------------------|---------------------------|------------------------|------------------------|------------------------|
|                                  | 1990                        | 2000                   | 2010                    | 2019                    | 1990                      | 2000                   | 2010                   | 2019                   |
| Philippines                      | 113076<br>(105522-121107)   | 85573<br>(79683-92156) | 74512<br>(67728-82217)  | 59751<br>(45268-79169)  | 39410<br>(35523-43507)    | 37714<br>(34235-41560) | 35325<br>(31431-39752) | 28992<br>(21602-38848) |
| Poland                           | 10054<br>(9835-10274)       | 3621<br>(3539-3703)    | 2351<br>(2298-2405)     | 1624<br>(1568-1681)     | 6301<br>(6123-6480)       | 2179<br>(2111-2245)    | 1417<br>(1371-1463)    | 997<br>(954-1041)      |
| Portugal                         | 1703<br>(1667-1742)         | 808<br>(786-833)       | 375<br>(361-391)        | 295<br>(275-316)        | 821<br>(785-859)          | 379<br>(358-401)       | 204<br>(192-217)       | 156<br>(141-172)       |
| Qatar                            | 218<br>(205-233)            | 143<br>(137-151)       | 176<br>(168-184)        | 172<br>(151-196)        | 119<br>(106-135)          | 78<br>(71-84)          | 94<br>(85-102)         | 90<br>(76-107)         |
| Republic of Korea                | 10152<br>(9602-10708)       | 4448<br>(4310-4596)    | 1880<br>(1846-1916)     | 1200<br>(1134-1269)     | 4839<br>(4220-5610)       | 1938<br>(1776-2109)    | 798<br>(727-869)       | 565<br>(505-628)       |
| Republic of Moldova              | 2770<br>(2380-3218)         | 1567<br>(1296-1866)    | 768<br>(669-923)        | 584<br>(433-781)        | 1508<br>(1273-1782)       | 991<br>(812-1191)      | 574<br>(491-695)       | 428<br>(309-588)       |
| Republic of North Macedonia      | 1275<br>(1234-1317)         | 424<br>(404-444)       | 232<br>(218-247)        | 137<br>(121-155)        | 606<br>(568-647)          | 240<br>(224-257)       | 152<br>(140-165)       | 87<br>(74-100)         |
| Romania                          | 10420<br>(10155-10701)      | 4675<br>(4555-4802)    | 2694<br>(2624-2768)     | 1317<br>(1259-1374)     | 5113<br>(4012-6488)       | 2268<br>(1875-2671)    | 1176<br>(958-1385)     | 644<br>(545-751)       |
| Russian Federation               | 45302<br>(44419-46185)      | 25391<br>(24895-25898) | 17911<br>(17570-18258)  | 10556<br>(10217-10897)  | 21771<br>(15893-28576)    | 11934<br>(10202-13676) | 7857<br>(6619-9082)    | 4751<br>(4017-5483)    |
| Rwanda                           | 47944<br>(45011-51165)      | 51321<br>(47503-55495) | 21667<br>(18994-24686)  | 13310<br>(7648-23261)   | 12951<br>(11648-14314)    | 12241<br>(10851-13740) | 8023<br>(6820-9347)    | 6261<br>(3511-11062)   |
| Saint Kitts and Nevis            | 26<br>(24-29)               | 19<br>(17-21)          | 13<br>(11-15)           | 11<br>(8-15)            | 16<br>(14-18)             | 13<br>(11-15)          | 9<br>(7-10)            | 7<br>(5-10)            |
| Saint Lucia                      | 85<br>(82-90)               | 56<br>(53-59)          | 44<br>(41-47)           | 48<br>(42-56)           | 47<br>(43-51)             | 34<br>(31-37)          | 29<br>(27-32)          | 28<br>(23-33)          |
| Saint Vincent and the Grenadines | 64<br>(60-68)               | 49<br>(45-53)          | 35<br>(32-39)           | 23<br>(18-29)           | 34<br>(31-38)             | 28<br>(26-31)          | 22<br>(20-25)          | 14<br>(11-18)          |
| Samoa                            | 162<br>(142-185)            | 111<br>(97-125)        | 96<br>(81-112)          | 72<br>(49-104)          | 89<br>(66-114)            | 61<br>(42-81)          | 53<br>(34-73)          | 39<br>(22-64)          |
| San Marino                       | 4<br>(3-5)                  | 2<br>(1-2)             | 1<br>(1-1)              | 0<br>(0-1)              | 2<br>(1-3)                | 1<br>(1-1)             | 0<br>(0-1)             | 0<br>(0-0)             |
| Sao Tome and Principe            | 495<br>(438-561)            | 460<br>(401-528)       | 287<br>(226-358)        | 198<br>(122-323)        | 125<br>(97-157)           | 128<br>(96-158)        | 115<br>(86-154)        | 94<br>(53-167)         |
| Saudi Arabia                     | 25226<br>(20986-30084)      | 12073<br>(10787-13518) | 7206<br>(6175-9125)     | 3964<br>(2972-5378)     | 12496<br>(8768-16830)     | 6700<br>(4671-8779)    | 4059<br>(2586-5744)    | 2170<br>(1247-3346)    |
| Senegal                          | 42929<br>(40806-45141)      | 47921<br>(45140-51036) | 31047<br>(28693-33530)  | 24651<br>(19201-31643)  | 12869<br>(11883-13927)    | 14583<br>(13216-15967) | 13045<br>(11853-14339) | 12156<br>(9356-15921)  |
| Serbia                           | 4019<br>(3919-4123)         | 1519<br>(1475-1566)    | 720<br>(693-748)        | 441<br>(356-546)        | 2447<br>(2216-2669)       | 918<br>(863-971)       | 443<br>(415-471)       | 265<br>(208-333)       |
| Seychelles                       | 27<br>(25-30)               | 21<br>(19-23)          | 24<br>(21-26)           | 23<br>(17-30)           | 18<br>(16-21)             | 13<br>(12-15)          | 15<br>(13-17)          | 14<br>(10-19)          |
| Sierra Leone                     | 49148<br>(45390-53101)      | 45600<br>(42543-48839) | 38814<br>(35805-41990)  | 27580<br>(22873-33217)  | 10268<br>(8900-11891)     | 10231<br>(9003-11713)  | 9779<br>(8578-11103)   | 8013<br>(6227-10140)   |
| Singapore                        | 409<br>(392-427)            | 200<br>(188-212)       | 138<br>(128-147)        | 128<br>(113-145)        | 222<br>(208-236)          | 81<br>(74-89)          | 55<br>(49-61)          | 46<br>(38-54)          |
| Slovakia                         | 1200<br>(1179-1222)         | 539<br>(526-552)       | 394<br>(382-405)        | 325<br>(309-344)        | 693<br>(667-720)          | 273<br>(259-286)       | 190<br>(179-201)       | 164<br>(151-177)       |
| Slovenia                         | 241<br>(233-250)            | 97<br>(92-101)         | 67<br>(64-71)           | 42<br>(37-48)           | 129<br>(121-137)          | 57<br>(52-61)          | 38<br>(35-41)          | 23<br>(19-27)          |
| Solomon Islands                  | 470<br>(411-535)            | 438<br>(392-490)       | 456<br>(387-537)        | 416<br>(275-614)        | 183<br>(148-225)          | 190<br>(161-225)       | 197<br>(158-243)       | 176<br>(105-279)       |
| Somalia                          | 58841<br>(49095-71747)      | 71078<br>(56368-91556) | 79997<br>(56301-116810) | 72126<br>(37180-144567) | 15464<br>(11814-20087)    | 19072<br>(14163-26330) | 22984<br>(13968-37780) | 23723<br>(10435-51887) |
| South Africa                     | 64220<br>(57235-71842)      | 72667<br>(68120-77677) | 59647<br>(56585-62777)  | 40631<br>(35967-45708)  | 21966<br>(18452-25966)    | 15288<br>(13028-18605) | 13396<br>(11122-15409) | 13489<br>(10816-16840) |



|                             | Number of under-five deaths |                           |                           |                          | Number of neonatal deaths |                        |                        |                        |
|-----------------------------|-----------------------------|---------------------------|---------------------------|--------------------------|---------------------------|------------------------|------------------------|------------------------|
|                             | 1990                        | 2000                      | 2010                      | 2019                     | 1990                      | 2000                   | 2010                   | 2019                   |
| South Sudan                 | 62176<br>(51678-72833)      | 45908<br>(39185-53518)    | 36498<br>(25973-48685)    | 36916<br>(14811-74426)   | 16214<br>(11331-21793)    | 14829<br>(11008-19415) | 15028<br>(9379-23084)  | 14976<br>(5279-34421)  |
| Spain                       | 3759<br>(3688-3831)         | 2119<br>(2079-2158)       | 1908<br>(1873-1944)       | 1221<br>(1130-1326)      | 1994<br>(1910-2077)       | 1123<br>(1072-1173)    | 1042<br>(997-1086)     | 698<br>(607-797)       |
| Sri Lanka                   | 7892<br>(7737-8042)         | 5714<br>(5607-5825)       | 4202<br>(4097-4309)       | 2378<br>(1945-2883)      | 4801<br>(4579-5021)       | 3329<br>(3186-3470)    | 2305<br>(2197-2414)    | 1416<br>(1133-1766)    |
| State of Palestine          | 4138<br>(3819-4478)         | 3579<br>(3292-3880)       | 3096<br>(2666-3617)       | 2771<br>(1985-3963)      | 2113<br>(1879-2372)       | 1985<br>(1776-2204)    | 1739<br>(1468-2069)    | 1528<br>(1053-2244)    |
| Sudan                       | 105625<br>(98107-113855)    | 108266<br>(99668-117536)  | 90839<br>(79995-102883)   | 78028<br>(57099-104633)  | 36076<br>(32222-40233)    | 39942<br>(35336-44626) | 38951<br>(33574-45222) | 37126<br>(26558-51113) |
| Suriname                    | 503<br>(429-590)            | 348<br>(294-406)          | 250<br>(200-311)          | 191<br>(130-292)         | 233<br>(148-308)          | 193<br>(151-238)       | 160<br>(122-209)       | 119<br>(74-191)        |
| Sweden                      | 799<br>(776-825)            | 379<br>(365-393)          | 341<br>(328-354)          | 305<br>(285-327)         | 408<br>(388-429)          | 213<br>(201-225)       | 183<br>(172-194)       | 165<br>(151-180)       |
| Switzerland                 | 650<br>(632-670)            | 435<br>(421-449)          | 358<br>(345-371)          | 353<br>(314-395)         | 314<br>(299-330)          | 264<br>(252-277)       | 251<br>(239-262)       | 244<br>(214-278)       |
| Syrian Arab Republic        | 16210<br>(14690-17843)      | 11637<br>(10461-12941)    | 10851<br>(8982-12723)     | 9195<br>(5261-12114)     | 7232<br>(6312-8278)       | 6257<br>(5450-7166)    | 5725<br>(4645-6918)    | 4545<br>(2589-6261)    |
| Tajikistan                  | 21209<br>(19349-23254)      | 15889<br>(14210-17728)    | 9919<br>(8635-11433)      | 9377<br>(6082-14771)     | 6503<br>(5442-7844)       | 5417<br>(4600-6398)    | 4820<br>(4048-5810)    | 4183<br>(2361-6905)    |
| Thailand                    | 40239<br>(37741-42712)      | 20327<br>(18256-22172)    | 10830<br>(9543-12216)     | 6444<br>(5538-8197)      | 22168<br>(17460-25365)    | 11716<br>(8744-14276)  | 6284<br>(4443-7964)    | 3759<br>(2522-5173)    |
| Timor-Leste                 | 5161<br>(4662-5708)         | 3763<br>(3419-4144)       | 2075<br>(1670-2560)       | 1645<br>(987-2752)       | 1724<br>(1461-2050)       | 1312<br>(1124-1515)    | 822<br>(578-1087)      | 742<br>(389-1345)      |
| Togo                        | 21883<br>(20347-23539)      | 21938<br>(20407-23588)    | 20480<br>(18588-22532)    | 17331<br>(13953-21420)   | 6697<br>(5983-7498)       | 7073<br>(6322-7894)    | 6982<br>(6099-7951)    | 6563<br>(5044-8445)    |
| Tonga                       | 66<br>(56-79)               | 50<br>(42-59)             | 48<br>(40-57)             | 42<br>(31-56)            | 31<br>(24-42)             | 22<br>(17-27)          | 20<br>(15-26)          | 19<br>(13-27)          |
| Trinidad and Tobago         | 794<br>(663-932)            | 527<br>(397-728)          | 462<br>(266-885)          | 312<br>(137-733)         | 511<br>(413-612)          | 352<br>(250-498)       | 310<br>(169-601)       | 202<br>(86-489)        |
| Tunisia                     | 12010<br>(10547-13620)      | 5068<br>(4425-5783)       | 3453<br>(3296-3610)       | 3398<br>(3129-3695)      | 5908<br>(5055-6866)       | 3155<br>(2685-3667)    | 2405<br>(2214-2591)    | 2381<br>(2138-2650)    |
| Turkey                      | 103389<br>(96637-110649)    | 52806<br>(48685-57400)    | 23676<br>(21774-25556)    | 13149<br>(11651-14925)   | 45994<br>(41418-51031)    | 25558<br>(22693-28674) | 11800<br>(10395-13225) | 6905<br>(6067-7897)    |
| Turkmenistan                | 10254<br>(8980-11690)       | 7483<br>(6497-8636)       | 5356<br>(4204-6751)       | 5793<br>(4141-8067)      | 3513<br>(2938-4197)       | 3171<br>(2661-3777)    | 2959<br>(2286-3789)    | 3233<br>(2251-4544)    |
| Tuvalu                      | 14<br>(12-17)               | 10<br>(9-11)              | 9<br>(6-12)               | 7<br>(4-13)              | 7<br>(6-9)                | 6<br>(5-7)             | 6<br>(4-8)             | 5<br>(2-9)             |
| Uganda                      | 147695<br>(139217-156611)   | 160536<br>(151140-170395) | 107995<br>(100014-116448) | 74053<br>(56345-96855)   | 33549<br>(29961-37289)    | 36959<br>(32921-41213) | 36708<br>(32768-41252) | 32914<br>(24097-44724) |
| Ukraine                     | 12850<br>(11577-14682)      | 7572<br>(6928-8466)       | 5729<br>(5554-5904)       | 3514<br>(3340-3697)      | 7747<br>(6553-9246)       | 4507<br>(3799-5281)    | 3477<br>(2639-4124)    | 2047<br>(1490-2519)    |
| United Arab Emirates        | 777<br>(659-908)            | 579<br>(547-613)          | 767<br>(746-790)          | 750<br>(643-872)         | 397<br>(328-479)          | 313<br>(277-364)       | 427<br>(384-485)       | 398<br>(328-480)       |
| United Kingdom              | 7223<br>(7084-7370)         | 4612<br>(4527-4700)       | 4080<br>(4004-4159)       | 3313<br>(3148-3487)      | 3490<br>(3380-3605)       | 2636<br>(2561-2714)    | 2430<br>(2363-2502)    | 2142<br>(2015-2275)    |
| United Republic of Tanzania | 175465<br>(165418-186338)   | 172198<br>(161805-183603) | 124464<br>(113265-137204) | 103222<br>(77641-140529) | 44425<br>(40682-48694)    | 47036<br>(42994-51573) | 44220<br>(39362-50097) | 42814<br>(31593-59216) |
| United States of America    | 43948<br>(43185-44759)      | 33310<br>(32759-33854)    | 30021<br>(29532-30516)    | 25352<br>(23785-27005)   | 22777<br>(22153-23442)    | 18384<br>(17913-18870) | 16696<br>(16265-17136) | 14546<br>(13500-15658) |
| Uruguay                     | 1295<br>(1268-1321)         | 921<br>(899-943)          | 516<br>(499-533)          | 337<br>(315-359)         | 686<br>(592-774)          | 455<br>(423-488)       | 232<br>(210-252)       | 200<br>(182-220)       |
| Uzbekistan                  | 50580                       | 35606                     | 21186                     | 12045                    | 22012                     | 15846                  | 11970                  | 6827                   |

|                                          | Number of under-five deaths |                        |                        |                        | Number of neonatal deaths |                        |                        |                        |
|------------------------------------------|-----------------------------|------------------------|------------------------|------------------------|---------------------------|------------------------|------------------------|------------------------|
|                                          | 1990                        | 2000                   | 2010                   | 2019                   | 1990                      | 2000                   | 2010                   | 2019                   |
|                                          | (44678-57178)               | (30992-41245)          | (17231-25685)          | (9807-14796)           | (18366-26044)             | (13100-19110)          | (8485-15881)           | (4649-9317)            |
| Vanuatu                                  | 184<br>(154-219)            | 173<br>(147-204)       | 222<br>(175-282)       | 224<br>(136-368)       | 85<br>(65-116)            | 78<br>(58-97)          | 100<br>(71-135)        | 100<br>(51-182)        |
| Venezuela<br>(Bolivarian<br>Republic of) | 16484<br>(16024-16942)      | 12361<br>(12108-12624) | 10088<br>(9888-10291)  | 12620<br>(10422-15417) | 7214<br>(6802-7646)       | 6372<br>(6056-6693)    | 6226<br>(5970-6485)    | 7520<br>(5770-9511)    |
| Viet Nam                                 | 98618<br>(91061-107317)     | 42632<br>(35985-49625) | 34215<br>(30962-37426) | 31689<br>(25637-40419) | 45456<br>(40149-52315)    | 21505<br>(17644-25552) | 18238<br>(15500-21047) | 16587<br>(12143-22593) |
| Yemen                                    | 74760<br>(70188-79853)      | 64423<br>(59222-69999) | 43746<br>(37653-50578) | 50312<br>(30260-81616) | 27149<br>(24732-29777)    | 25454<br>(22874-28288) | 21467<br>(18229-25226) | 23220<br>(13792-38118) |
| Zambia                                   | 62826<br>(59004-66916)      | 68180<br>(63726-73020) | 43540<br>(40100-47286) | 38460<br>(30438-48353) | 13191<br>(11919-14508)    | 15977<br>(14516-17614) | 14498<br>(13038-16097) | 14902<br>(11528-19262) |
| Zimbabwe                                 | 28408<br>(25928-30950)      | 34362<br>(31142-37661) | 39169<br>(35938-42786) | 24166<br>(18143-31818) | 9220<br>(8210-10296)      | 9945<br>(8930-11017)   | 14781<br>(13234-16547) | 11283<br>(8219-15216)  |

### 3.4. Table A.4 Series in U5MR database

Note: The series name refers to a specific data collection source and estimation method. There are several sources – including VR, censuses and sample surveys – where:

- VR (direct) series are based on birth and death registration data
- Survey (direct) series are based on data on births and deaths from full birth histories
- Census (direct) series are based on household deaths in the previous 12 months
- Census or survey (indirect) series are based on summary birth histories (i.e., mean number of children ever born and children surviving by age of mother or time since first birth)

|                                                   | Data series                                                                                               | Inclusion |
|---------------------------------------------------|-----------------------------------------------------------------------------------------------------------|-----------|
| Afghanistan                                       | National Demographic and Family Guidance Survey 1972 (Household Deaths)                                   | 0         |
|                                                   | National Demographic and Family Guidance Survey 1972 (Indirect)                                           | 1         |
|                                                   | Census 1979 (Household Deaths)                                                                            | 1         |
|                                                   | Multiple Indicator Cluster Survey 1997 (Indirect)                                                         | 1         |
|                                                   | Multiple Indicator Cluster Survey 2000 (Indirect)                                                         | 0         |
|                                                   | Multiple Indicator Cluster Survey 2003 (Direct)                                                           | 0         |
|                                                   | Multiple Indicator Cluster Survey 2003 (Indirect)                                                         | 0         |
|                                                   | Afghanistan Health Survey 2006-2007 (Indirect)                                                            | 1         |
|                                                   | National Risk and Vulnerability Assessment Survey 2007-2008 (Indirect)                                    | 1         |
|                                                   | Afghanistan Mortality Survey (AMS) Excluding South Zone 2010 (Direct)                                     | 0         |
|                                                   | Afghanistan Mortality Survey (AMS) Excluding South Zone (Household data (5 year)) 2010 (Household Deaths) | 1         |
|                                                   | Afghanistan Mortality Survey (AMS) Excluding South Zone (NN adjusted) 2010 (Direct)                       | 1         |
|                                                   | Multiple Indicator Cluster Survey 2010-2011 (Indirect)                                                    | 1         |
|                                                   | Multiple Indicator Cluster Survey Excluding South Zone 2010-2011 (Indirect)                               | 0         |
|                                                   | Afghanistan Living Conditions Survey 2011-2012 (Indirect)                                                 | 0         |
|                                                   | Demographic and Health Survey 2015 (Direct)                                                               | 0         |
|                                                   | Demographic and Health Survey (NN adjusted) 2015 (Direct)                                                 | 1         |
|                                                   | Afghanistan Health Survey 2015 2015 (Direct)                                                              | 0         |
|                                                   | Afghanistan Health Survey 2018 (Direct)                                                                   | 0         |
|                                                   | Afghanistan Health Survey (NN adjusted) 2018 (Direct)                                                     | 1         |
| Albania                                           | Multiple Indicator Cluster Survey 2000 (Indirect)                                                         | 1         |
|                                                   | Reproductive Health Survey 2002 (Direct)                                                                  | 1         |
|                                                   | Multiple Indicator Cluster Survey 2005 (Indirect)                                                         | 1         |
|                                                   | Demographic and Health Survey 2008-2009 (Direct)                                                          | 1         |
|                                                   | Demographic and Health Survey 2008-2009 (Indirect)                                                        | 0         |
|                                                   | Census 2011 (Indirect)                                                                                    | 0         |
|                                                   | Demographic and Health Survey 2017-2018 (Direct)                                                          | 0         |
|                                                   | UNPD Demographic Yearbook Data 2020 version 2020 (VR)                                                     | 0         |
| VR Submitted to WHO/UNIGME 2020 version 2020 (VR) | 1                                                                                                         |           |
| Algeria                                           | Life Tables (Life Table)                                                                                  | 1         |
|                                                   | Algeria Fertility Survey 1970 (Indirect)                                                                  | 1         |
|                                                   | Demographic Survey 1970 (Direct)                                                                          | 1         |
|                                                   | National Fertility Survey 1986 (Direct)                                                                   | 1         |
|                                                   | PAPCHILD Maternal and Child Health Survey 1992 (Direct)                                                   | 1         |
|                                                   | Multiple Indicator Cluster Survey 1995 (Direct)                                                           | 1         |
|                                                   | Multiple Indicator Cluster Survey 2000 (Indirect)                                                         | 1         |
|                                                   | PAPFAM Family Health Survey 2002 (Direct)                                                                 | 1         |
|                                                   | Multiple Indicator Cluster Survey 2006 (Indirect)                                                         | 1         |
|                                                   | Multiple Indicator Cluster Survey 2012-2013 (Direct)                                                      | 0         |
| VR from Demographie Algerienne 2012 2011 (VR)     | 0                                                                                                         |           |

|                     | <b>Data series</b>                                                              | <b>Inclusion</b> |
|---------------------|---------------------------------------------------------------------------------|------------------|
|                     | VR from Demographie Algerienne 2013 2012 (VR)                                   | 0                |
|                     | VR from Demographie Algerienne 2014 2013 (VR)                                   | 0                |
|                     | VR from Demographie Algerienne 2014 2014 (VR)                                   | 0                |
|                     | VR from Demographie Algerienne 2015 2015 (VR)                                   | 0                |
|                     | VR from Demographie Algerienne 2016 2016 (VR)                                   | 0                |
|                     | VR from Demographie Algerienne 2017 2017 (VR)                                   | 0                |
|                     | VR from Demographie Algerienne 2018 2018 (VR)                                   | 0                |
|                     | VR Submitted to WHO/UNIGME 2020 version 2020 (VR)                               | 1                |
| Andorra             | Recalculated VR Submitted to WHO/UNIGME 2020 version 2020 (VR)                  | 1                |
|                     | VR Submitted to WHO/UNIGME 2020 version 2020 (VR)                               | 0                |
| Angola              | Census 1940 (Indirect)                                                          | 0                |
|                     | Multiple Indicator Cluster Survey 1996 (Indirect)                               | 1                |
|                     | Multiple Indicator Cluster Survey 2001 (Indirect)                               | 1                |
|                     | Malaria Indicator Survey 2006-2007 (Indirect)                                   | 1                |
|                     | Household Incomes and Expenditures Survey IBEP 2008-2009 (Indirect)             | 1                |
|                     | Malaria Indicator Survey 2011 (Direct)                                          | 0                |
|                     | Census 2014 (Indirect)                                                          | 0                |
|                     | Census 2014 (Household Deaths)                                                  | 0                |
|                     | Demographic and Health Survey 2015-2016 (Direct)                                | 1                |
| Antigua and Barbuda | Recalculated VR Submitted to WHO/UNIGME 2020 version 2020 (VR)                  | 1                |
|                     | UNPD Demographic Yearbook Data 2020 version 2020 (VR)                           | 1                |
|                     | VR Submitted to WHO/UNIGME 2020 version 2020 (VR)                               | 0                |
| Argentina           | TABLAS DE VIDA NACIONALES (Life Table)                                          | 0                |
|                     | Census 1970 (Indirect)                                                          | 0                |
|                     | Census 1980 (Indirect)                                                          | 0                |
|                     | Census 1991 (Indirect)                                                          | 0                |
|                     | Census 2001 (Indirect)                                                          | 0                |
|                     | Census 2010 (Indirect)                                                          | 0                |
|                     | VR Submitted to WHO/UNIGME 2020 version 2020 (VR)                               | 1                |
| Armenia             | Census 1989 (Indirect)                                                          | 0                |
|                     | Demographic and Health Survey 2000 (Direct)                                     | 1                |
|                     | Demographic and Health Survey 2000 (Indirect)                                   | 0                |
|                     | Census 2001 (Indirect)                                                          | 1                |
|                     | Demographic and Health Survey 2005 (Direct)                                     | 1                |
|                     | Demographic and Health Survey 2005 (Indirect)                                   | 0                |
|                     | Demographic and Health Survey 2010 (Direct)                                     | 1                |
|                     | Census 2011 (Household Deaths)                                                  | 0                |
|                     | Census 2011 (Indirect)                                                          | 0                |
|                     | Demographic and Health Survey 2015-2016 (Direct)                                | 0                |
|                     | Transmonee Vital Registration Data 2008 version 2008 (VR)                       | 0                |
|                     | Vital Registration data from The Demographic Handbook of Armenia 2011 2011 (VR) | 0                |
|                     | Vital Registration data from The Demographic Handbook of Armenia 2014 2014 (VR) | 0                |
|                     | Vital Registration data from The Demographic Handbook of Armenia 2016 2016 (VR) | 0                |
|                     | VR Submitted to WHO/UNIGME 2020 version 2020 (VR)                               | 1                |
| Australia           | VR Submitted to WHO/UNIGME 2020 version 2020 (VR)                               | 1                |
| Austria             | UNPD Demographic Yearbook Data 2020 version 2020 (VR)                           | 1                |
|                     | VR Submitted to WHO/UNIGME 2020 version 2020 (VR)                               | 1                |
| Azerbaijan          | Census 1989 (Indirect)                                                          | 0                |
|                     | Census 1999 (Indirect)                                                          | 0                |
|                     | Multiple Indicator Cluster Survey 2000 (Indirect)                               | 1                |
|                     | Reproductive Health Survey 2001 (Direct)                                        | 1                |
|                     | Demographic and Health Survey 2006 (Direct)                                     | 1                |
|                     | Demographic and Health Survey 2006 (Indirect)                                   | 0                |
|                     | Census 2009 (Indirect)                                                          | 0                |

|            | <b>Data series</b>                                                   | <b>Inclusion</b> |
|------------|----------------------------------------------------------------------|------------------|
|            | Azerbaijan National DHS 2011 (Direct)                                | 1                |
|            | Transmonee Vital Registration Data 2008 version 2008 (VR)            | 0                |
|            | VR from Children in Azerbaijan Report 2013 2013 (VR)                 | 0                |
|            | VR from Children in Azerbaijan Report 2016 2016 (VR)                 | 0                |
|            | Adjusted National Vital Registration Data 2018 (VR)                  | 1                |
|            | VR Submitted to WHO/UNIGME 2020 version 2020 (VR)                    | 1                |
| Bahamas    | Recalculated VR Submitted to WHO/UNIGME 2020 version 2020 (VR)       | 1                |
|            | VR Submitted to WHO/UNIGME 2020 version 2020 (VR)                    | 0                |
| Bahrain    | Census 1965 (Indirect)                                               | 0                |
|            | Census 1971 (Indirect)                                               | 1                |
|            | Census 1981 (Indirect)                                               | 1                |
|            | Child Health Survey 1989 (Direct)                                    | 1                |
|            | Child Health Survey 1989 (Indirect)                                  | 0                |
|            | Census 1991 (Indirect)                                               | 1                |
|            | Gulf Family Health Survey 1995 (Direct)                              | 1                |
|            | Gulf Family Health Survey 1995 (Indirect)                            | 0                |
|            | Census 2001 (Indirect)                                               | 1                |
|            | VR Submitted to WHO/UNIGME 2020 version 2020 (VR)                    | 1                |
| Bangladesh | Population Growth Estimation Experiment 1962-1965 (Household Deaths) | 0                |
|            | Population Growth Estimation Experiment 1965 (Direct)                | 1                |
|            | Retrospective Fertility and Mortality Survey (UN SA) 1974 (Indirect) | 1                |
|            | World Fertility Survey 1975-1976 (Direct)                            | 1                |
|            | World Fertility Survey 1975-1976 (Indirect)                          | 0                |
|            | Contraceptive Prevalence Survey 1979-1980 (Indirect)                 | 0                |
|            | Contraceptive Prevalence Survey 1981 (Indirect)                      | 1                |
|            | Contraceptive Prevalence Survey 1983-1984 (Indirect)                 | 1                |
|            | Contraceptive Prevalence Survey 1985-1986 (Indirect)                 | 1                |
|            | National Life Tables 1987 (Life Table)                               | 1                |
|            | Fertility Survey 1988-1989 (Direct)                                  | 1                |
|            | Demographic and Health Survey 1993-1994 (Direct)                     | 1                |
|            | Demographic and Health Survey 1993-1994 (Indirect)                   | 0                |
|            | Health and Demographic Survey 1994 (Indirect)                        | 1                |
|            | Demographic and Health Survey 1996-1997 (Direct)                     | 1                |
|            | Demographic and Health Survey 1996-1997 (Indirect)                   | 0                |
|            | Demographic and Health Survey 1999-2000 (Direct)                     | 1                |
|            | Demographic and Health Survey 1999-2000 (Indirect)                   | 0                |
|            | Maternal Health Services and Maternal Mortality Survey 2001 (Direct) | 1                |
|            | Demographic and Health Survey 2004 (Direct)                          | 1                |
|            | Demographic and Health Survey 2004 (Indirect)                        | 0                |
|            | Demographic and Health Survey 2007 (Direct)                          | 1                |
|            | Demographic and Health Survey 2007 (Indirect)                        | 0                |
|            | Multiple Indicator Cluster Survey 2009 (Indirect)                    | 1                |
|            | Demographic and Health Survey 2011 (Direct)                          | 1                |
|            | Census 2011 (Household Deaths)                                       | 1                |
|            | Multiple Indicator Cluster Survey 2012-2013 (Indirect)               | 1                |
|            | Demographic and Health Survey 2014 (Direct)                          | 1                |
|            | Demographic and Health Survey 2017-2018 (Direct)                     | 1                |
|            | Multiple Indicator Cluster Survey 2019 (Direct)                      | 1                |
|            | Bangladesh Demographic Survey and Vital Registration 1988 (VR)       | 1                |
|            | Report on Sample Vital Registration System 2012 (VR)                 | 1                |
|            | Report on Sample Vital Registration System 2018 (VR)                 | 1                |
| Barbados   | Recalculated VR Submitted to WHO/UNIGME 2020 version 2020 (VR)       | 1                |
|            | UNPD Demographic Yearbook Data 2020 version 2020 (VR)                | 1                |
|            | VR Submitted to WHO/UNIGME 2020 version 2020 (VR)                    | 0                |

|                                                   | <b>Data series</b>                                                       | <b>Inclusion</b> |
|---------------------------------------------------|--------------------------------------------------------------------------|------------------|
| Belarus                                           | Census 1989 (Indirect)                                                   | 0                |
|                                                   | Census 1999 (Indirect)                                                   | 0                |
|                                                   | Multiple Indicator Cluster Survey 2005 (Indirect)                        | 0                |
|                                                   | Transmonee Vital Registration Data 2008 version 2008 (VR)                | 0                |
|                                                   | Demographic Yearbook of the Republic of Belarus 2012 (VR)                | 0                |
|                                                   | VR Submitted to WHO/UNIGME 2020 version 2020 (VR)                        | 1                |
| Belgium                                           | UNPD Demographic Yearbook Data 2020 version 2020 (VR)                    | 1                |
|                                                   | VR Submitted to WHO/UNIGME 2020 version 2020 (VR)                        | 1                |
| Belize                                            | Family Health Survey 1991 (Direct)                                       | 1                |
|                                                   | Family Health Survey 1999 (Indirect)                                     | 1                |
|                                                   | Census 2000 (Indirect)                                                   | 1                |
|                                                   | Multiple Indicator Cluster Survey 2006 (Indirect)                        | 1                |
|                                                   | Multiple Indicator Cluster Survey 2011 (Indirect)                        | 1                |
|                                                   | Multiple Indicator Cluster Survey 2015-2016 (Direct)                     | 0                |
|                                                   | Vital Registration Data from MOH (Abstract of Statistics 2008) 2008 (VR) | 0                |
|                                                   | UNPD Demographic Yearbook Data 2020 version 2020 (VR)                    | 0                |
|                                                   | VR Submitted to WHO/UNIGME 2020 version 2020 (VR)                        | 1                |
| Benin                                             | Survey 1961 (Indirect)                                                   | 1                |
|                                                   | Benin Fertility Survey 1981-1982 (Indirect)                              | 0                |
|                                                   | World Fertility Survey 1981-1982 (Direct)                                | 1                |
|                                                   | Enquete a passages repetes 1981-1983 (Household Deaths)                  | 1                |
|                                                   | Census 1992 (Indirect)                                                   | 1                |
|                                                   | Demographic and Health Survey 1996 (Direct)                              | 1                |
|                                                   | Demographic and Health Survey 1996 (Indirect)                            | 0                |
|                                                   | Demographic and Health Survey 2001 (Direct)                              | 1                |
|                                                   | Demographic and Health Survey 2001 (Indirect)                            | 0                |
|                                                   | Demographic and Health Survey 2006 (Direct)                              | 1                |
|                                                   | Demographic and Health Survey 2006 (Indirect)                            | 0                |
|                                                   | Demographic and Health Survey 2011-2012 (Direct)                         | 0                |
|                                                   | Multiple Indicator Cluster Survey 2014 (Direct)                          | 1                |
|                                                   | Demographic and Health Survey 2017-2018 (Direct)                         | 1                |
| Bhutan                                            | Demographic Sample Survey 1984 (Direct)                                  | 1                |
|                                                   | Demographic Sample Survey 1984 (Indirect)                                | 1                |
|                                                   | National Health Survey 1994 (Household Deaths)                           | 1                |
|                                                   | National Health Survey 2000 (Direct)                                     | 1                |
|                                                   | Census 2005 (Household Deaths)                                           | 1                |
|                                                   | Census 2005 (Indirect)                                                   | 1                |
|                                                   | Multiple Indicator Cluster Survey 2010 (Indirect)                        | 1                |
|                                                   | National Health Survey 2012 (Direct)                                     | 1                |
|                                                   | Census 2017 (Household Deaths)                                           | 0                |
| Bolivia<br>(Plurinational<br>State of)            | EDEN 1975 (Indirect)                                                     | 1                |
|                                                   | Census 1976 (Indirect)                                                   | 1                |
|                                                   | National Demographic Survey 1980 (Household Deaths)                      | 1                |
|                                                   | National Demographic Survey 1980 (Indirect)                              | 1                |
|                                                   | ENPV 1988 (Indirect)                                                     | 1                |
|                                                   | Demographic and Health Survey 1989 (Direct)                              | 1                |
|                                                   | Demographic and Health Survey 1989 (Indirect)                            | 0                |
|                                                   | Census 1992 (Household Deaths)                                           | 0                |
|                                                   | Census 1992 (Indirect)                                                   | 0                |
|                                                   | Demographic and Health Survey 1993-1994 (Direct)                         | 1                |
|                                                   | Demographic and Health Survey 1993-1994 (Indirect)                       | 0                |
|                                                   | Demographic and Health Survey 1998 (Direct)                              | 1                |
|                                                   | Demographic and Health Survey 1998 (Indirect)                            | 0                |
| Multiple Indicator Cluster Survey 2000 (Indirect) | 1                                                                        |                  |

| <b>Data series</b>     |                                                             | <b>Inclusion</b> |
|------------------------|-------------------------------------------------------------|------------------|
|                        | Census 2001 (Household Deaths)                              | 0                |
|                        | Census 2001 (Indirect)                                      | 1                |
|                        | Demographic and Health Survey 2003 (Direct)                 | 1                |
|                        | Demographic and Health Survey 2003 (Indirect)               | 0                |
|                        | Demographic and Health Survey 2008 (Direct)                 | 1                |
|                        | Census 2012 (Indirect)                                      | 1                |
|                        | Census 2012 (Household Deaths)                              | 1                |
|                        | Demographic and Health Survey 2016 (Direct)                 | 1                |
| Bosnia and Herzegovina | VR Submitted to WHO/UNIGME 2020 version 2020 (VR)           | 1                |
| Botswana               | Census 1971 (Indirect)                                      | 1                |
|                        | Census 1981 (Household Deaths)                              | 0                |
|                        | Census 1981 (Indirect)                                      | 1                |
|                        | Family Health Survey 1984 (Indirect)                        | 1                |
|                        | Family Health Survey 1988 (Direct)                          | 0                |
|                        | Family Health Survey 1988 (Indirect)                        | 0                |
|                        | Family Health Survey (MM adjusted) 1988 (Direct)            | 1                |
|                        | Census 1991 (Household Deaths)                              | 0                |
|                        | Census 1991 (Indirect)                                      | 1                |
|                        | Family Health Survey 1996 (Direct)                          | 0                |
|                        | Family Health Survey (MM adjusted) 1996 (Direct)            | 0                |
|                        | Demographic Survey 1998 (Household Deaths)                  | 0                |
|                        | Multiple Indicator Cluster Survey 2000 (Indirect)           | 1                |
|                        | Census 2001 (Household Deaths)                              | 0                |
|                        | Census 2001 (Indirect)                                      | 1                |
|                        | Demographic Survey 2006 (Household Deaths)                  | 0                |
|                        | Demographic Survey 2006 (Indirect)                          | 1                |
|                        | Family Health Survey 2007-2008 (Direct)                     | 0                |
|                        | Family Health Survey (MM adjusted) 2007-2008 (Direct)       | 1                |
|                        | Census 2011 (Household Deaths)                              | 0                |
|                        | Census 2011 (Indirect)                                      | 0                |
|                        | Demographic Survey 2017 (Indirect)                          | 1                |
|                        | Vital Statistics Report from Statistics Botswana 2020 (VR)  | 0                |
| Brazil                 | Census 1970 (Indirect)                                      | 1                |
|                        | National Health Survey 1972 (Indirect)                      | 1                |
|                        | National Health Survey 1973 (Indirect)                      | 1                |
|                        | National Health Survey 1976 (Indirect)                      | 1                |
|                        | National Health Survey 1977 (Indirect)                      | 1                |
|                        | National Health Survey 1978 (Indirect)                      | 1                |
|                        | Census 1980 (Indirect)                                      | 1                |
|                        | National Health Survey 1984 (Indirect)                      | 1                |
|                        | Demographic and Health Survey 1986 (Direct)                 | 1                |
|                        | Demographic and Health Survey 1986 (Indirect)               | 0                |
|                        | National Health Survey 1986 (Indirect)                      | 1                |
|                        | Pesquisa Nacional por Amostra de Domicilios 1986 (Direct)   | 1                |
|                        | Census 1991 (Indirect)                                      | 1                |
|                        | Demographic and Health Survey 1996 (Direct)                 | 1                |
|                        | Demographic and Health Survey 1996 (Indirect)               | 0                |
|                        | Census 2000 (Indirect)                                      | 1                |
|                        | Pesquisa Nacional por Amostra de Domicilios 2002 (Indirect) | 1                |
|                        | Pesquisa Nacional por Amostra de Domicilios 2003 (Indirect) | 1                |
|                        | Pesquisa Nacional por Amostra de Domicilios 2004 (Indirect) | 1                |
|                        | Pesquisa Nacional por Amostra de Domicilios 2005 (Indirect) | 1                |

|              | <b>Data series</b>                                                                  | <b>Inclusion</b> |
|--------------|-------------------------------------------------------------------------------------|------------------|
|              | Pesquisa Nacional por Amostra de Domicilios 2006 (Indirect)                         | 1                |
|              | Pesquisa Nacional por Amostra de Domicilios 2007 (Indirect)                         | 1                |
|              | Pesquisa Nacional por Amostra de Domicilios 2008 (Indirect)                         | 1                |
|              | Pesquisa Nacional por Amostra de Domicilios 2009 (Indirect)                         | 1                |
|              | Census 2010 (Indirect)                                                              | 0                |
|              | Census 2010 (Household Deaths)                                                      | 0                |
|              | Pesquisa Nacional por Amostra de Domicilios 2011 (Indirect)                         | 1                |
|              | Pesquisa Nacional por Amostra de Domicilios 2012 (Indirect)                         | 1                |
|              | Pesquisa Nacional por Amostra de Domicilios 2013 (Indirect)                         | 1                |
|              | Pesquisa Nacional por Amostra de Domicilios 2014 (Indirect)                         | 1                |
|              | Pesquisa Nacional por Amostra de Domicilios 2015 (Indirect)                         | 1                |
|              | Data from Information System of Ministry of Health (Busca Ativa) 2018 (VR)          | 1                |
|              | Data from Information System of Ministry of Health (Direct) 2018 (VR)               | 0                |
|              | VR Submitted to WHO/UNIGME 2020 version 2020 (VR)                                   | 0                |
| Brunei       | Census 1960 (Indirect)                                                              | 1                |
| Darussalam   | Recalculated VR Submitted to WHO/UNIGME 2020 version 2020 (VR)                      | 1                |
|              | UNPD Demographic Yearbook Data 2020 version 2020 (VR)                               | 1                |
|              | VR Submitted to WHO/UNIGME 2020 version 2020 (VR)                                   | 0                |
| Bulgaria     | UNPD Demographic Yearbook Data 2020 version 2020 (VR)                               | 1                |
|              | VR Submitted to WHO/UNIGME 2020 version 2020 (VR)                                   | 1                |
| Burkina Faso | Survey 1960-1961 (Indirect)                                                         | 1                |
|              | Post-Enumeration Survey 1976 (Indirect)                                             | 1                |
|              | Census 1985 (Household Deaths)                                                      | 0                |
|              | Census 1985 (Indirect)                                                              | 1                |
|              | Survey 1991 (Indirect)                                                              | 1                |
|              | Demographic and Health Survey 1993 (Direct)                                         | 1                |
|              | Demographic and Health Survey 1993 (Indirect)                                       | 0                |
|              | Demographic and Health Survey 1998-1999 (Direct)                                    | 1                |
|              | Demographic and Health Survey 1998-1999 (Indirect)                                  | 0                |
|              | Demographic and Health Survey 2003 (Direct)                                         | 1                |
|              | Demographic and Health Survey 2003 (Indirect)                                       | 0                |
|              | Census 2006 (Household Deaths)                                                      | 0                |
|              | Census 2006 (Indirect)                                                              | 0                |
|              | Multiple Indicator Cluster Survey 2006 (Indirect)                                   | 1                |
|              | Recensement General de la Population et de l'Habitat (RGPH) 2006 (Household Deaths) | 0                |
|              | Recensement General de la Population et de l'Habitat (RGPH) 2006 (Indirect)         | 0                |
|              | Global Fund Evaluation Survey 2008 (Household Deaths)                               | 0                |
|              | Demographic and Health Survey 2010 (Direct)                                         | 1                |
|              | Malaria Indicator Survey 2014 (Indirect)                                            | 1                |
|              | L Enquete sur le Module Demographie et Sante 2015 (Direct)                          | 0                |
|              | Malaria Indicator Survey 2017-2018 (Indirect)                                       | 1                |
| Burundi      | Population Survey 1965 (Household Deaths)                                           | 0                |
|              | Demographic Survey 1970 (Direct)                                                    | 1                |
|              | Demographic Survey 1970 (Indirect)                                                  | 0                |
|              | Post Census Survey 1979 (Indirect)                                                  | 1                |
|              | Demographic and Health Survey 1987 (Direct)                                         | 1                |
|              | Demographic and Health Survey 1987 (Indirect)                                       | 0                |
|              | Census 1990 (Indirect)                                                              | 1                |
|              | Multiple Indicator Cluster Survey 2000 (Indirect)                                   | 1                |
|              | Multiple Indicator Cluster Survey 2005 (Indirect)                                   | 1                |
|              | Census 2008 (Indirect)                                                              | 1                |
|              | Census 2008 (Household Deaths)                                                      | 0                |
|              | Demographic and Health Survey 2010-2011 (Direct)                                    | 1                |
|              | Malaria Indicator Survey 2012 (Indirect)                                            | 1                |



|            | <b>Data series</b>                                                                                                                                       | <b>Inclusion</b> |
|------------|----------------------------------------------------------------------------------------------------------------------------------------------------------|------------------|
|            | Enquete menages pour le suivi et l'évaluation de l'impact de l'appui au systeme de remboursement du Paquet Minimum des Services de sante 2012 (Indirect) | 1                |
|            | Demographic and Health Survey 2016-2017 (Direct)                                                                                                         | 1                |
| Cabo Verde | Census 1960 (Indirect)                                                                                                                                   | 1                |
|            | Census 1970 (Direct)                                                                                                                                     | 1                |
|            | Census 1980 (Direct)                                                                                                                                     | 1                |
|            | Demographic and Reproductive Health Survey 1998 (Direct)                                                                                                 | 1                |
|            | Census 2000 (Direct)                                                                                                                                     | 1                |
|            | Census 2000 (Household Deaths)                                                                                                                           | 0                |
|            | Demographic and Health Survey 2005 (Direct)                                                                                                              | 1                |
|            | Demographic and Health Survey 2005 (Indirect)                                                                                                            | 0                |
|            | Census 2010 (Indirect)                                                                                                                                   | 1                |
|            | Vital Registration Data from Relatorio Estatistico 2007 2009 Ministry of Health 2007-2009 (VR)                                                           | 0                |
|            | UNPD Vital Registration Data 2010 version 2010 (VR)                                                                                                      | 0                |
|            | VR from Relatorio Estatistico 2012 (VR)                                                                                                                  | 0                |
|            | VR Submitted to WHO/UNIGME 2020 version 2020 (VR)                                                                                                        | 1                |
| Cambodia   | Survey 1959 (Household Deaths)                                                                                                                           | 0                |
|            | Census extracted from IPUMS 1962 (Indirect)                                                                                                              | 0                |
|            | Census 1998 (Indirect)                                                                                                                                   | 1                |
|            | National Health Survey 1998 (Direct)                                                                                                                     | 0                |
|            | National Health Survey 1998 (Indirect)                                                                                                                   | 1                |
|            | Demographic and Health Survey 2000 (Direct)                                                                                                              | 1                |
|            | Demographic and Health Survey 2000 (Indirect)                                                                                                            | 0                |
|            | Inter-censal Population Survey 2004 (Indirect)                                                                                                           | 1                |
|            | Demographic and Health Survey 2005 (Direct)                                                                                                              | 1                |
|            | Demographic and Health Survey 2005 (Indirect)                                                                                                            | 0                |
|            | Census 2008 (Indirect)                                                                                                                                   | 0                |
|            | Census extracted from IPUMS 2008 (Household Deaths)                                                                                                      | 0                |
|            | Demographic and Health Survey 2010 (Direct)                                                                                                              | 1                |
|            | Demographic and Health Survey 2014 (Direct)                                                                                                              | 1                |
| Cameroon   | Census 1976 (Household Deaths)                                                                                                                           | 0                |
|            | World Fertility Survey 1978 (Direct)                                                                                                                     | 1                |
|            | World Fertility Survey 1978 (Indirect)                                                                                                                   | 0                |
|            | Census 1987 (Household Deaths)                                                                                                                           | 0                |
|            | Demographic and Health Survey 1991 (Direct)                                                                                                              | 0                |
|            | Demographic and Health Survey 1991 (Indirect)                                                                                                            | 0                |
|            | Demographic and Health Survey (MM adjusted) 1991 (Direct)                                                                                                | 1                |
|            | Demographic and Health Survey 1998 (Direct)                                                                                                              | 0                |
|            | Demographic and Health Survey 1998 (Indirect)                                                                                                            | 0                |
|            | Demographic and Health Survey (MM adjusted) 1998 (Direct)                                                                                                | 1                |
|            | Multiple Indicator Cluster Survey 2000 (Indirect)                                                                                                        | 1                |
|            | Demographic and Health Survey 2004 (Direct)                                                                                                              | 0                |
|            | Demographic and Health Survey 2004 (Indirect)                                                                                                            | 0                |
|            | Demographic and Health Survey (MM adjusted) 2004 (Direct)                                                                                                | 1                |
|            | Census 2005 (Indirect)                                                                                                                                   | 0                |
|            | Census 2005 (Household Deaths)                                                                                                                           | 0                |
|            | Demographic and Health Survey 2011 (Direct)                                                                                                              | 0                |
|            | Demographic and Health Survey (MM adjusted) 2011 (Direct)                                                                                                | 1                |
|            | Multiple Indicator Cluster Survey 2014 (Direct)                                                                                                          | 0                |
|            | Multiple Indicator Cluster Survey (MM adjusted) 2014 (Direct)                                                                                            | 1                |
|            | Demographic and Health Survey 2018 (Direct)                                                                                                              | 0                |
|            | Demographic and Health Survey (MM adjusted) 2018 (Direct)                                                                                                | 1                |
| Canada     | VR Submitted to WHO/UNIGME 2020 version 2020 (VR)                                                                                                        | 1                |
|            | Survey 1959-1960 (Household Deaths)                                                                                                                      | 0                |

|                                                                                                      | <b>Data series</b>                                                                        | <b>Inclusion</b>                       |   |
|------------------------------------------------------------------------------------------------------|-------------------------------------------------------------------------------------------|----------------------------------------|---|
| Central African Republic                                                                             | Census 1975 (Indirect)                                                                    | 1                                      |   |
|                                                                                                      | Census 1988 (Household Deaths)                                                            | 0                                      |   |
|                                                                                                      | Census 1988 (Indirect)                                                                    | 1                                      |   |
|                                                                                                      | Demographic and Health Survey 1994-1995 (Direct)                                          | 0                                      |   |
|                                                                                                      | Demographic and Health Survey 1994-1995 (Indirect)                                        | 0                                      |   |
|                                                                                                      | Demographic and Health Survey (MM adjusted) 1994-1995 (Direct)                            | 1                                      |   |
|                                                                                                      | Multiple Indicator Cluster Survey 2000 (Indirect)                                         | 1                                      |   |
|                                                                                                      | Census 2003 (Household Deaths)                                                            | 0                                      |   |
|                                                                                                      | Multiple Indicator Cluster Survey 2006 (Indirect)                                         | 1                                      |   |
|                                                                                                      | Multiple Indicator Cluster Survey 2010 (Indirect)                                         | 1                                      |   |
|                                                                                                      | Enquete Nationale Sur la Situation Nutritionnelle et la Mortalite 2012 (Household Deaths) | 0                                      |   |
| Chad                                                                                                 | Census 1993 (Indirect)                                                                    | 0                                      |   |
|                                                                                                      | Demographic and Health Survey 1996-1997 (Direct)                                          | 1                                      |   |
|                                                                                                      | Demographic and Health Survey 1996-1997 (Indirect)                                        | 0                                      |   |
|                                                                                                      | Multiple Indicator Cluster Survey 2000 (Indirect)                                         | 1                                      |   |
|                                                                                                      | Demographic and Health Survey 2004 (Direct)                                               | 1                                      |   |
|                                                                                                      | Demographic and Health Survey 2004 (Indirect)                                             | 0                                      |   |
|                                                                                                      | Census 2009 (Indirect)                                                                    | 0                                      |   |
|                                                                                                      | Census 2009 (Household Deaths)                                                            | 0                                      |   |
|                                                                                                      | Multiple Indicator Cluster Survey 2010 (Indirect)                                         | 1                                      |   |
|                                                                                                      | Demographic and Health Survey 2014-2015 (Direct)                                          | 1                                      |   |
|                                                                                                      | Chile                                                                                     | TABLAS DE VIDA NACIONALES (Life Table) | 0 |
| Census 1970 (Indirect)                                                                               |                                                                                           | 0                                      |   |
| Census 1982 (Indirect)                                                                               |                                                                                           | 0                                      |   |
| Census 1992 (Indirect)                                                                               |                                                                                           | 0                                      |   |
| Census 2002 (Indirect)                                                                               |                                                                                           | 0                                      |   |
| Census 2017 (Indirect)                                                                               |                                                                                           | 0                                      |   |
| Vital Registration from Ministerio de Salud. Departamento de Estadisticas de Salud.Anexo Salud1 (VR) |                                                                                           | 0                                      |   |
| VR Submitted to WHO/UNIGME 2020 version 2020 (VR)                                                    |                                                                                           | 1                                      |   |
| China                                                                                                | Adjusted Census Deaths (Household Deaths)                                                 | 1                                      |   |
|                                                                                                      | National Life Tables (Life Table)                                                         | 0                                      |   |
|                                                                                                      | Census 1982 (Indirect)                                                                    | 1                                      |   |
|                                                                                                      | Population Sample Survey 1982 (Indirect)                                                  | 1                                      |   |
|                                                                                                      | Intercensal Population Sample Survey of One-Percent 1987 (Household Deaths)               | 0                                      |   |
|                                                                                                      | Intercensal Population Sample Survey of One-Percent 1987 (Indirect)                       | 1                                      |   |
|                                                                                                      | National Survey on Fertility and Birth Control 1988 (Direct)                              | 1                                      |   |
|                                                                                                      | Census 1990 (Indirect)                                                                    | 0                                      |   |
|                                                                                                      | Fertility Sampling Survey 1992 (Direct)                                                   | 1                                      |   |
|                                                                                                      | Intercensal Population Sample Survey of One-Percent 1995 (Indirect)                       | 0                                      |   |
|                                                                                                      | Census 2000 (Indirect)                                                                    | 0                                      |   |
|                                                                                                      | National Survey on Causes of Death 2004-2005 (Household Deaths)                           | 0                                      |   |
|                                                                                                      | Intercensal Population Sample Survey of One-Percent 2005 (Direct)                         | 0                                      |   |
|                                                                                                      | Intercensal Population Sample Survey of One-Percent 2005 (Indirect)                       | 0                                      |   |
|                                                                                                      | Census 2010 (Household Deaths)                                                            | 0                                      |   |
|                                                                                                      | Census 2010 (Indirect)                                                                    | 0                                      |   |
|                                                                                                      | Intercensal Population Sample Survey of One-Percent 2015 (Indirect)                       | 0                                      |   |
|                                                                                                      | NHFPC, Death Registration Data 2019 (VR)                                                  | 1                                      |   |
|                                                                                                      | Colombia                                                                                  | Census 1973 (Indirect)                 | 1 |
|                                                                                                      |                                                                                           | World Fertility Survey 1976 (Direct)   | 1 |
| World Fertility Survey 1976 (Indirect)                                                               |                                                                                           | 0                                      |   |
| Contraceptive Prevalence Survey 1978 (Indirect)                                                      |                                                                                           | 1                                      |   |
| Household Survey (HOG) 1978 (Indirect)                                                               |                                                                                           | 1                                      |   |
| Household Survey (HOG) 1980 (Indirect)                                                               |                                                                                           | 1                                      |   |
| Census 1985 (Indirect)                                                                               |                                                                                           | 1                                      |   |

|              | <b>Data series</b>                                             | <b>Inclusion</b> |
|--------------|----------------------------------------------------------------|------------------|
|              | Demographic and Health Survey 1986 (Direct)                    | 1                |
|              | Demographic and Health Survey 1986 (Indirect)                  | 0                |
|              | Demographic and Health Survey 1990 (Direct)                    | 1                |
|              | Demographic and Health Survey 1990 (Indirect)                  | 0                |
|              | Demographic and Health Survey 1995 (Direct)                    | 1                |
|              | Demographic and Health Survey 1995 (Indirect)                  | 0                |
|              | Demographic and Health Survey 2000 (Direct)                    | 1                |
|              | Demographic and Health Survey 2000 (Indirect)                  | 0                |
|              | Demographic and Health Survey 2005 (Direct)                    | 1                |
|              | Demographic and Health Survey 2005 (Indirect)                  | 0                |
|              | Census 2005 (Household Deaths)                                 | 0                |
|              | Census 2005 (Indirect)                                         | 0                |
|              | Demographic and Health Survey 2010 (Direct)                    | 1                |
|              | Demographic and Health Survey 2010 (Indirect)                  | 0                |
|              | Demographic and Health Survey 2015 (Direct)                    | 1                |
|              | Vital Registration (Mexico March 2009) 2009 (VR)               | 0                |
|              | UNPD Demographic Yearbook Data 2020 version 2020 (VR)          | 0                |
|              | VR Submitted to WHO/UNIGME 2020 version 2020 (VR)              | 0                |
| Comoros      | Census 1958 (Household Deaths)                                 | 0                |
|              | Census 1980 (Household Deaths)                                 | 1                |
|              | Census 1980 (Indirect)                                         | 0                |
|              | Census 1991 (Household Deaths)                                 | 1                |
|              | Demographic and Health Survey 1996 (Direct)                    | 1                |
|              | Demographic and Health Survey 1996 (Indirect)                  | 0                |
|              | Multiple Indicator Cluster Survey 2000 (Indirect)              | 0                |
|              | Census 2003 (Household Deaths)                                 | 1                |
|              | Demographic and Health Survey 2012 (Direct)                    | 0                |
| Congo        | Census 1974 (Household Deaths)                                 | 0                |
|              | Census 1974 (Indirect)                                         | 1                |
|              | Census 1984 (Household Deaths)                                 | 0                |
|              | Demographic and Health Survey 2005 (Direct)                    | 1                |
|              | Demographic and Health Survey 2005 (Indirect)                  | 0                |
|              | AIDS Indicator Survey 2009 (Indirect)                          | 1                |
|              | Demographic and Health Survey 2011-2012 (Direct)               | 1                |
|              | Multiple Indicator Cluster Survey 2014-2015 (Direct)           | 1                |
| Cook Islands | Census 1966 (Indirect)                                         | 1                |
|              | Census 1976 (Indirect)                                         | 0                |
|              | Census 1981 (Indirect)                                         | 1                |
|              | Census 1996 (Indirect)                                         | 1                |
|              | Census 2001 (Indirect)                                         | 1                |
|              | Census 2006 (Indirect)                                         | 1                |
|              | Census 2011 (Indirect)                                         | 1                |
|              | Vital Statistics Report 2009-2013 (VR)                         | 0                |
|              | Recalculated VR Submitted to WHO/UNIGME 2020 version 2020 (VR) | 1                |
|              | VR Submitted to WHO/UNIGME 2020 version 2020 (VR)              | 0                |
| Costa Rica   | TABLAS DE VIDA NACIONALES (Life Table)                         | 0                |
|              | Census 1973 (Indirect)                                         | 1                |
|              | National Fertility Survey 1976 (Indirect)                      | 0                |
|              | World Fertility Survey 1976 (Direct)                           | 1                |
|              | Contraceptive Prevalence Survey 1978 (Indirect)                | 0                |
|              | Contraceptive Prevalence Survey 1981 (Indirect)                | 0                |
|              | Census 1984 (Indirect)                                         | 1                |
|              | National Survey of Fertility and Health 1986 (Indirect)        | 0                |
|              | Census 2000 (Indirect)                                         | 0                |

|                                       | <b>Data series</b>                                                                                     | <b>Inclusion</b> |
|---------------------------------------|--------------------------------------------------------------------------------------------------------|------------------|
|                                       | Census 2011 (Indirect)                                                                                 | 0                |
|                                       | Vital Registration (Mexico March 26, Roberto) (VR)                                                     | 0                |
|                                       | UNPD Demographic Yearbook Data 2020 version 2020 (VR)                                                  | 1                |
|                                       | VR Submitted to WHO/UNIGME 2020 version 2020 (VR)                                                      | 1                |
| Cote d'Ivoire                         | Survey 1957-1958 (Indirect)                                                                            | 0                |
|                                       | Demographic Survey Repeated Passages 1978-1979 (Household Deaths)                                      | 0                |
|                                       | Demographic Survey Repeated Passages 1978-1979 (Direct)                                                | 1                |
|                                       | Demographic Survey Repeated Passages 1978-1979 (Indirect)                                              | 0                |
|                                       | World Fertility Survey 1980-1981 (Direct)                                                              | 1                |
|                                       | World Fertility Survey 1980-1981 (Indirect)                                                            | 0                |
|                                       | Census 1988 (Indirect)                                                                                 | 0                |
|                                       | Demographic and Health Survey 1994 (Direct)                                                            | 0                |
|                                       | Demographic and Health Survey 1994 (Indirect)                                                          | 0                |
|                                       | Demographic and Health Survey (MM adjusted) 1994 (Direct)                                              | 1                |
|                                       | Census 1998 (Household Deaths)                                                                         | 0                |
|                                       | Demographic and Health Survey 1998-1999 (Direct)                                                       | 0                |
|                                       | Demographic and Health Survey 1998-1999 (Indirect)                                                     | 0                |
|                                       | Demographic and Health Survey (MM adjusted) 1998-1999 (Direct)                                         | 1                |
|                                       | AIDS Indicator Survey 2005 (Direct)                                                                    | 0                |
|                                       | AIDS Indicator Survey 2005 (Indirect)                                                                  | 0                |
|                                       | AIDS Indicator Survey (MM adjusted) 2005 (Direct)                                                      | 1                |
|                                       | AIDS Indicator Survey 2005 (Household Deaths)                                                          | 0                |
|                                       | Demographic and Health Survey 2011-2012 (Direct)                                                       | 0                |
|                                       | Demographic and Health Survey (MM adjusted) 2011-2012 (Direct)                                         | 1                |
|                                       | Multiple Indicator Cluster Survey 2016 (Direct)                                                        | 0                |
|                                       | Multiple Indicator Cluster Survey (MM adjusted) 2016 (Direct)                                          | 1                |
| Croatia                               | Census 2011 (Household Deaths)                                                                         | 0                |
|                                       | VR Submitted to WHO/UNIGME 2020 version 2020 (VR)                                                      | 1                |
| Cuba                                  | National Life Tables (Life Table)                                                                      | 0                |
|                                       | TABLAS DE VIDA NACIONALES (Life Table)                                                                 | 0                |
|                                       | National Population Survey on Income and Expenditures 1974 (Indirect)                                  | 0                |
|                                       | National Demographic Survey 1979 (Indirect)                                                            | 0                |
|                                       | Census 1981 (Indirect)                                                                                 | 0                |
|                                       | National Fertility Survey 1987 (Indirect)                                                              | 0                |
|                                       | Multiple Indicator Cluster Survey 2010-2011 (Indirect)                                                 | 0                |
|                                       | Vital Registration 2013 (VR)                                                                           | 0                |
|                                       | Vital Registration 2016 (VR)                                                                           | 0                |
|                                       | UNPD Demographic Yearbook Data 2020 version 2020 (VR)                                                  | 1                |
|                                       | VR Submitted to WHO/UNIGME 2020 version 2020 (VR)                                                      | 1                |
| Cyprus                                | Recalculated VR Submitted to WHO/UNIGME 2020 version 2020 (VR)                                         | 1                |
|                                       | UNPD Demographic Yearbook Data 2020 version 2020 (VR)                                                  | 1                |
|                                       | VR Submitted to WHO/UNIGME 2020 version 2020 (VR)                                                      | 0                |
| Czechia                               | VR Submitted to WHO/UNIGME 2020 version 2020 (VR)                                                      | 1                |
| Democratic People's Republic of Korea | Census (adjusted fro 1q0 and thus 5q0 based on 4q0 and south model life table) 1993 (Household Deaths) | 1                |
|                                       | Census (adjusted 1q0 and thus 5q0 based on 4q1 and north model life table) 2008 (Household Deaths)     | 1                |
|                                       | Socio-economic, Demographic and Health Survey 2014 (Life Table)                                        | 0                |
|                                       | Multiple Indicator Cluster Survey 2017 (Direct)                                                        | 0                |
|                                       | Civil Registration data from Central Bureau of Statistics 2000 (VR)                                    | 1                |
| Democratic Republic of the Congo      | Census 1984 (Indirect)                                                                                 | 1                |
|                                       | Multiple Indicator Cluster Survey 1995 (Indirect)                                                      | 1                |
|                                       | Multiple Indicator Cluster Survey 2001 (Indirect)                                                      | 1                |
|                                       | Demographic and Health Survey 2007 (Direct)                                                            | 1                |
|                                       | Demographic and Health Survey 2007 (Indirect)                                                          | 0                |
|                                       | Multiple Indicator Cluster Survey 2010 (Indirect)                                                      | 1                |

|                    | <b>Data series</b>                                                           | <b>Inclusion</b> |
|--------------------|------------------------------------------------------------------------------|------------------|
|                    | Demographic and Health Survey 2013-2014 (Direct)                             | 1                |
|                    | Multiple Indicator Cluster Survey 2017-2018 (Direct)                         | 0                |
| Denmark            | VR Submitted to WHO/UNIGME 2020 version 2020 (VR)                            | 1                |
| Djibouti           | Demographic Survey 1991 (Indirect)                                           | 1                |
|                    | PAPFAM Family Health Survey 2002 (Direct)                                    | 1                |
|                    | Multiple Indicator Cluster Survey 2006 (Indirect)                            | 1                |
|                    | PAPFAM Family Health Survey 2012 (Direct)                                    | 1                |
| Dominica           | Recalculated VR Submitted to WHO/UNIGME 2020 version 2020 (VR)               | 1                |
|                    | VR Submitted to WHO/UNIGME 2020 version 2020 (VR)                            | 0                |
| Dominican Republic | Census 1970 (Indirect)                                                       | 1                |
|                    | World Fertility Survey 1975 (Direct)                                         | 1                |
|                    | World Fertility Survey 1975 (Indirect)                                       | 0                |
|                    | World Fertility Survey 1980 (Direct)                                         | 1                |
|                    | World Fertility Survey 1980 (Indirect)                                       | 0                |
|                    | Census 1981 (Indirect)                                                       | 1                |
|                    | Contraceptive Prevalence Survey 1983 (Indirect)                              | 1                |
|                    | Demographic and Health Survey 1986 (Direct)                                  | 1                |
|                    | Demographic and Health Survey 1986 (Indirect)                                | 0                |
|                    | Demographic and Health Survey 1991 (Direct)                                  | 1                |
|                    | Demographic and Health Survey 1991 (Indirect)                                | 0                |
|                    | Demographic and Health Survey 1996 (Direct)                                  | 1                |
|                    | Demographic and Health Survey 1996 (Indirect)                                | 0                |
|                    | Demographic and Health Survey 1999 (Direct)                                  | 0                |
|                    | Multiple Indicator Cluster Survey 2000 (Indirect)                            | 1                |
|                    | Demographic and Health Survey 2002 (Direct)                                  | 1                |
|                    | Demographic and Health Survey 2002 (Indirect)                                | 0                |
|                    | Census 2002 (Indirect)                                                       | 0                |
|                    | Multiple Indicator Cluster Survey 2006 (Direct)                              | 1                |
|                    | Demographic and Health Survey 2007 (Direct)                                  | 1                |
|                    | Demographic and Health Survey 2007 (Indirect)                                | 0                |
|                    | Census 2010 (Indirect)                                                       | 0                |
|                    | Census 2010 (Household Deaths)                                               | 0                |
|                    | Demographic and Health Survey 2013 (Direct)                                  | 1                |
|                    | Multiple Indicator Cluster Survey 2014 (Direct)                              | 1                |
|                    | VR Submitted to WHO/UNIGME 2020 version 2020 (VR)                            | 0                |
| Ecuador            | Census 1974 (Indirect)                                                       | 1                |
|                    | National Fertility Survey 1979-1980 (Indirect)                               | 0                |
|                    | World Fertility Survey 1979-1980 (Direct)                                    | 1                |
|                    | Census 1982 (Indirect)                                                       | 1                |
|                    | ESMID 1982 (Indirect)                                                        | 1                |
|                    | Demographic and Family Health Survey 1987 (Direct)                           | 1                |
|                    | Demographic and Family Health Survey 1987 (Indirect)                         | 0                |
|                    | Demographic and Maternal and Child Health Survey 1989 (Direct)               | 1                |
|                    | Census 1990 (Indirect)                                                       | 1                |
|                    | Demographic and Maternal and Child Health Survey 1994 (Direct)               | 0                |
|                    | Demographic and Maternal and Child Health Survey 1999 (Direct)               | 1                |
|                    | Census 2001 (Indirect)                                                       | 1                |
|                    | Demographic and Maternal and Child Health Survey 2004 (Direct)               | 1                |
|                    | Census 2010 (Indirect)                                                       | 1                |
|                    | National Health and Nutrition Survey 2012 (Direct)                           | 0                |
|                    | National Health and Nutrition Survey, Imputed birth 2012 (Direct)            | 0                |
|                    | National Health and Nutrition Survey, Imputed birth and deaths 2012 (Direct) | 1                |
|                    | National Health and Nutrition Survey 2018 (Direct)                           | 0                |
|                    | National Health and Nutrition Survey 2018 (Indirect)                         | 0                |

|                                                                                              | <b>Data series</b>                                        | <b>Inclusion</b>                              |   |
|----------------------------------------------------------------------------------------------|-----------------------------------------------------------|-----------------------------------------------|---|
|                                                                                              | Adjusted Vital Registration (Live Births) 2018 (VR)       | 1                                             |   |
|                                                                                              | Vital Registration (INEC Population projection) 2018 (VR) | 0                                             |   |
|                                                                                              | Vital Registration (Live Births) 2018 (VR)                | 0                                             |   |
|                                                                                              | UNPD Demographic Yearbook Data 2020 version 2020 (VR)     | 0                                             |   |
|                                                                                              | VR Submitted to WHO/UNIGME 2020 version 2020 (VR)         | 0                                             |   |
| Egypt                                                                                        | Census 1960 (Household Deaths)                            | 0                                             |   |
|                                                                                              | Census 1976 (Indirect)                                    | 0                                             |   |
|                                                                                              | World Fertility Survey 1980 (Direct)                      | 1                                             |   |
|                                                                                              | World Fertility Survey 1980 (Indirect)                    | 0                                             |   |
|                                                                                              | Contraceptive Prevalence Survey 1984 (Indirect)           | 1                                             |   |
|                                                                                              | Census 1986 (Indirect)                                    | 0                                             |   |
|                                                                                              | Demographic and Health Survey 1988 (Direct)               | 1                                             |   |
|                                                                                              | Demographic and Health Survey 1988 (Indirect)             | 0                                             |   |
|                                                                                              | PAPCHILD Maternal and Child Health Survey 1991 (Direct)   | 1                                             |   |
|                                                                                              | Demographic and Health Survey 1992 (Direct)               | 1                                             |   |
|                                                                                              | Demographic and Health Survey 1992 (Indirect)             | 0                                             |   |
|                                                                                              | Demographic and Health Survey 1995 (Direct)               | 1                                             |   |
|                                                                                              | Demographic and Health Survey 1995 (Indirect)             | 0                                             |   |
|                                                                                              | Demographic and Health Survey 1997 (Direct)               | 1                                             |   |
|                                                                                              | Demographic and Health Survey 1998 (Direct)               | 1                                             |   |
|                                                                                              | Demographic and Health Survey 2000 (Direct)               | 1                                             |   |
|                                                                                              | Demographic and Health Survey 2000 (Indirect)             | 0                                             |   |
|                                                                                              | Demographic and Health Survey 2003 (Direct)               | 1                                             |   |
|                                                                                              | Demographic and Health Survey 2003 (Indirect)             | 0                                             |   |
|                                                                                              | Demographic and Health Survey 2005 (Direct)               | 1                                             |   |
|                                                                                              | Demographic and Health Survey 2005 (Indirect)             | 0                                             |   |
|                                                                                              | Demographic and Health Survey 2008 (Direct)               | 1                                             |   |
|                                                                                              | Demographic and Health Survey 2014 (Direct)               | 1                                             |   |
|                                                                                              | Health Indicator Survey 2015 (Indirect)                   | 1                                             |   |
|                                                                                              | UNPD Demographic Yearbook Data 2020 version 2020 (VR)     | 0                                             |   |
|                                                                                              | VR Submitted to WHO/UNIGME 2020 version 2020 (VR)         | 0                                             |   |
|                                                                                              | El Salvador                                               | Census 1971 (Indirect)                        | 1 |
|                                                                                              |                                                           | National Fertility Survey 1973 (Indirect)     | 1 |
|                                                                                              |                                                           | National Family Health Survey 1985 (Direct)   | 0 |
|                                                                                              |                                                           | National Family Health Survey 1985 (Indirect) | 1 |
| National Family Health Survey 1988 (Direct)                                                  |                                                           | 1                                             |   |
| Census 1992 (Household Deaths)                                                               |                                                           | 0                                             |   |
| Census 1992 (Indirect)                                                                       |                                                           | 1                                             |   |
| Household Survey of Multiple Purposes 1992 (Indirect)                                        |                                                           | 1                                             |   |
| Household Survey of Multiple Purposes 1993 (Indirect)                                        |                                                           | 1                                             |   |
| National Family Health Survey 1993 (Direct)                                                  |                                                           | 1                                             |   |
| National Family Health Survey 1993 (Indirect)                                                |                                                           | 0                                             |   |
| National Family Health Survey 1998 (Direct)                                                  |                                                           | 1                                             |   |
| National Family Health Survey 1998 (Indirect)                                                |                                                           | 0                                             |   |
| National Family Health Survey 2002-2003 (Direct)                                             |                                                           | 1                                             |   |
| Census 2007 (Household Deaths)                                                               |                                                           | 0                                             |   |
| Census 2007 (Indirect)                                                                       |                                                           | 1                                             |   |
| National Family Health Survey 2008 (Direct)                                                  |                                                           | 1                                             |   |
| National Health Survey 2014 (Direct)                                                         |                                                           | 1                                             |   |
| Vital Registration data from Informe de Labores Ministerio de Salud 2010-2011 (VR)           |                                                           | 0                                             |   |
| Vital Registration data from Informe de Labores Ministerio de Salud 2013-2014 2013-2014 (VR) |                                                           | 0                                             |   |
| Vital Registration data from Informe de Labores Ministerio de Salud 2015-2016 2015-2016 (VR) |                                                           | 0                                             |   |
| UNPD Demographic Yearbook Data 2020 version 2020 (VR)                                        |                                                           | 0                                             |   |
| VR Submitted to WHO/UNIGME 2020 version 2020 (VR)                                            |                                                           | 0                                             |   |

|                                                               | <b>Data series</b>                                             | <b>Inclusion</b>       |
|---------------------------------------------------------------|----------------------------------------------------------------|------------------------|
| Equatorial Guinea                                             | Census 1983 (Household Deaths)                                 | 1                      |
|                                                               | Census 1994 (Household Deaths)                                 | 1                      |
|                                                               | Multiple Indicator Cluster Survey 2000 (Indirect)              | 1                      |
|                                                               | Census 2001 (Household Deaths)                                 | 1                      |
|                                                               | Demographic and Health Survey 2011 (Direct)                    | 1                      |
| Eritrea                                                       | Demographic and Health Survey 1995-1996 (Direct)               | 1                      |
|                                                               | Demographic and Health Survey 1995-1996 (Indirect)             | 0                      |
|                                                               | Demographic and Health Survey 2002 (Direct)                    | 1                      |
|                                                               | Demographic and Health Survey 2002 (Indirect)                  | 0                      |
|                                                               | Population and Health Survey 2010 (Direct)                     | 1                      |
| Estonia                                                       | Census 2011-2012 (Household Deaths)                            | 0                      |
|                                                               | Recalculated VR Submitted to WHO/UNIGME 2020 version 2020 (VR) | 1                      |
|                                                               | VR Submitted to WHO/UNIGME 2020 version 2020 (VR)              | 0                      |
| Eswatini                                                      | Census 1966 (Indirect)                                         | 1                      |
|                                                               | Census 1976 (Indirect)                                         | 1                      |
|                                                               | Census 1986 (Indirect)                                         | 1                      |
|                                                               | Census 1997 (Household Deaths)                                 | 0                      |
|                                                               | Census 1997 (Indirect)                                         | 1                      |
|                                                               | Multiple Indicator Cluster Survey 1999-2000 (Indirect)         | 1                      |
|                                                               | Demographic and Health Survey 2006-2007 (Household Deaths)     | 0                      |
|                                                               | Demographic and Health Survey 2006-2007 (Direct)               | 0                      |
|                                                               | Demographic and Health Survey 2006-2007 (Indirect)             | 0                      |
|                                                               | Demographic and Health Survey (MM adjusted) 2006-2007 (Direct) | 1                      |
|                                                               | Census 2007 (Household Deaths)                                 | 0                      |
|                                                               | Census 2007 (Indirect)                                         | 1                      |
|                                                               | Multiple Indicator Cluster Survey 2010 (Direct)                | 0                      |
|                                                               | Multiple Indicator Cluster Survey (MM adjusted) 2010 (Direct)  | 1                      |
|                                                               | Multiple Indicator Cluster Survey 2014 (Direct)                | 0                      |
| Multiple Indicator Cluster Survey (MM adjusted) 2014 (Direct) | 1                                                              |                        |
| Ethiopia                                                      | Demographic Survey 1981 (Household Deaths)                     | 0                      |
|                                                               | Demographic Survey 1981 (Indirect)                             | 1                      |
|                                                               | Census 1984 (Household Deaths)                                 | 0                      |
|                                                               | Census 1984 (Indirect)                                         | 0                      |
|                                                               | National Family and Fertility Survey 1990 (Direct)             | 1                      |
|                                                               | National Family and Fertility Survey 1990 (Indirect)           | 0                      |
|                                                               | Census 1994 (Indirect)                                         | 0                      |
|                                                               | Demographic and Health Survey 2000 (Direct)                    | 1                      |
|                                                               | Demographic and Health Survey 2000 (Indirect)                  | 0                      |
|                                                               | Demographic and Health Survey 2005 (Direct)                    | 1                      |
|                                                               | Demographic and Health Survey 2005 (Indirect)                  | 0                      |
|                                                               | Census 2007 (Household Deaths)                                 | 0                      |
|                                                               | Census 2007 (Indirect)                                         | 0                      |
|                                                               | Demographic and Health Survey 2011 (Direct)                    | 1                      |
|                                                               | Demographic and Health Survey 2016 (Direct)                    | 1                      |
|                                                               | Mini Demographic and Health Survey 2019 (Direct)               | 1                      |
|                                                               | Fiji                                                           | Census 1966 (Indirect) |
| World Fertility Survey 1974 (Direct)                          |                                                                | 1                      |
| Census 1986 (Indirect)                                        |                                                                | 1                      |
| Census 1996 (Indirect)                                        |                                                                | 1                      |
| VR Submitted to WHO/UNIGME 2020 version 2020 (VR)             |                                                                | 1                      |
| Finland                                                       | UNPD Demographic Yearbook Data 2020 version 2020 (VR)          | 1                      |
|                                                               | VR Submitted to WHO/UNIGME 2020 version 2020 (VR)              | 1                      |
| France                                                        | VR Submitted to WHO/UNIGME 2020 version 2020 (VR)              | 1                      |
| Gabon                                                         | Census 1960-1961 (Household Deaths)                            | 0                      |

|                                                                                         | <b>Data series</b>                                             | <b>Inclusion</b>                              |   |
|-----------------------------------------------------------------------------------------|----------------------------------------------------------------|-----------------------------------------------|---|
|                                                                                         | Demographic and Health Survey 2000 (Direct)                    | 0                                             |   |
|                                                                                         | Demographic and Health Survey 2000 (Indirect)                  | 0                                             |   |
|                                                                                         | Demographic and Health Survey (MM adjusted) 2000 (Direct)      | 1                                             |   |
|                                                                                         | Demographic and Health Survey 2012 (Direct)                    | 0                                             |   |
|                                                                                         | Demographic and Health Survey (MM adjusted) 2012 (Direct)      | 1                                             |   |
| Gambia                                                                                  | Census 1973 (Indirect)                                         | 1                                             |   |
|                                                                                         | Census 1983 (Indirect)                                         | 1                                             |   |
|                                                                                         | Census 1993 (Indirect)                                         | 1                                             |   |
|                                                                                         | Multiple Indicator Cluster Survey 2000 (Indirect)              | 1                                             |   |
|                                                                                         | Census 2003 (Indirect)                                         | 1                                             |   |
|                                                                                         | Multiple Indicator Cluster Survey 2005-2006 (Indirect)         | 1                                             |   |
|                                                                                         | Multiple Indicator Cluster Survey 2010 (Indirect)              | 1                                             |   |
|                                                                                         | Demographic and Health Survey 2013 (Direct)                    | 0                                             |   |
|                                                                                         | Census 2013 (Indirect)                                         | 0                                             |   |
|                                                                                         | Multiple Indicator Cluster Survey 2018 (Direct)                | 1                                             |   |
|                                                                                         | Demographic and Health Survey (Preliminary) 2019-2020 (Direct) | 1                                             |   |
|                                                                                         | Georgia                                                        | Census 1989 (Indirect)                        | 0 |
|                                                                                         |                                                                | Reproductive Health Survey 1999-2000 (Direct) | 1 |
| Census 2002 (Indirect)                                                                  |                                                                | 1                                             |   |
| Multiple Indicator Cluster Survey 2005 (Indirect)                                       |                                                                | 1                                             |   |
| Reproductive Health Survey 2005 (Direct)                                                |                                                                | 1                                             |   |
| Reproductive Health Survey 2010 (Direct)                                                |                                                                | 1                                             |   |
| Census 2014 (Indirect)                                                                  |                                                                | 0                                             |   |
| Multiple Indicator Cluster Survey 2018 (Indirect)                                       |                                                                | 0                                             |   |
| Vital Statistics of the National Center for Disease Control and Public Health 2016 (VR) |                                                                | 1                                             |   |
| Vital Statistics of the National Center for Disease Control and Public Health 2018 (VR) |                                                                | 1                                             |   |
| Germany                                                                                 | VR Submitted to WHO/UNIGME 2020 version 2020 (VR)              | 0                                             |   |
|                                                                                         | VR Submitted to WHO/UNIGME 2020 version 2020 (VR)              | 1                                             |   |
| Ghana                                                                                   | Census 1948 (Indirect)                                         | 1                                             |   |
|                                                                                         | Census 1960 (Indirect)                                         | 1                                             |   |
|                                                                                         | Census 1971 (Indirect)                                         | 1                                             |   |
|                                                                                         | Ghana Fertility Survey 1979-1980 (Indirect)                    | 0                                             |   |
|                                                                                         | World Fertility Survey 1979-1980 (Direct)                      | 0                                             |   |
|                                                                                         | Demographic and Health Survey 1988 (Direct)                    | 1                                             |   |
|                                                                                         | Demographic and Health Survey 1988 (Indirect)                  | 0                                             |   |
|                                                                                         | Demographic and Health Survey 1993-1994 (Direct)               | 1                                             |   |
|                                                                                         | Demographic and Health Survey 1993-1994 (Indirect)             | 0                                             |   |
|                                                                                         | Demographic and Health Survey 1998-1999 (Direct)               | 1                                             |   |
|                                                                                         | Demographic and Health Survey 1998-1999 (Indirect)             | 0                                             |   |
|                                                                                         | Census 2000 (Indirect)                                         | 0                                             |   |
|                                                                                         | Demographic and Health Survey 2003 (Direct)                    | 1                                             |   |
|                                                                                         | Demographic and Health Survey 2003 (Indirect)                  | 0                                             |   |
|                                                                                         | Multiple Indicator Cluster Survey 2006 (Indirect)              | 1                                             |   |
|                                                                                         | Maternal Health Survey 2007 (Direct)                           | 1                                             |   |
|                                                                                         | Demographic and Health Survey 2008 (Direct)                    | 1                                             |   |
|                                                                                         | Demographic and Health Survey 2008 (Indirect)                  | 0                                             |   |
|                                                                                         | Census 2010 (Household Deaths)                                 | 0                                             |   |
|                                                                                         | Census 2010 (Indirect)                                         | 1                                             |   |
|                                                                                         | Multiple Indicator Cluster Survey 2011 (Direct)                | 1                                             |   |
|                                                                                         | Demographic and Health Survey 2014 (Direct)                    | 1                                             |   |
|                                                                                         | Malaria Indicator Survey 2016 (Indirect)                       | 1                                             |   |
|                                                                                         | Maternal Health Survey 2017 (Direct)                           | 1                                             |   |
|                                                                                         | Multiple Indicator Cluster Survey 2017-2018 (Direct)           | 1                                             |   |
|                                                                                         | Dual Registration 1969 (VR)                                    | 1                                             |   |



|                                                   | <b>Data series</b>                                                                          | <b>Inclusion</b>                    |   |
|---------------------------------------------------|---------------------------------------------------------------------------------------------|-------------------------------------|---|
|                                                   | CCP Registration 1975 (VR)                                                                  | 1                                   |   |
| Greece                                            | UNPD Demographic Yearbook Data 2020 version 2020 (VR)                                       | 1                                   |   |
|                                                   | VR Submitted to WHO/UNIGME 2020 version 2020 (VR)                                           | 1                                   |   |
| Grenada                                           | Recalculated VR Submitted to WHO/UNIGME 2020 version 2020 (VR)                              | 1                                   |   |
|                                                   | UNPD Demographic Yearbook Data 2020 version 2020 (VR)                                       | 1                                   |   |
|                                                   | VR Submitted to WHO/UNIGME 2020 version 2020 (VR)                                           | 0                                   |   |
| Guatemala                                         | Census 1973 (Indirect)                                                                      | 1                                   |   |
|                                                   | Encuesta Nacional de Fecundidad, Planificacion Familiar y Comunicacion 1978-1979 (Indirect) | 1                                   |   |
|                                                   | Census 1981 (Indirect)                                                                      | 1                                   |   |
|                                                   | Demographic and Health Survey 1987 (Direct)                                                 | 1                                   |   |
|                                                   | Demographic and Health Survey 1987 (Indirect)                                               | 0                                   |   |
|                                                   | Enc. Nacional SocioDemografica 1987 (Indirect)                                              | 1                                   |   |
|                                                   | Enc. Nacional Sociodemografica 1989 (Indirect)                                              | 1                                   |   |
|                                                   | Census 1994 (Indirect)                                                                      | 1                                   |   |
|                                                   | Demographic and Health Survey 1995 (Direct)                                                 | 1                                   |   |
|                                                   | Demographic and Health Survey 1995 (Indirect)                                               | 0                                   |   |
|                                                   | Demographic and Health Survey 1998-1999 (Direct)                                            | 1                                   |   |
|                                                   | Demographic and Health Survey 1998-1999 (Indirect)                                          | 0                                   |   |
|                                                   | Census 2002 (Indirect)                                                                      | 1                                   |   |
|                                                   | Encuesta Nacional de Salud Materno Infantil (ENSMI) 2002 (Direct)                           | 1                                   |   |
|                                                   | Encuesta Nacional de Salud Materno Infantil (ENSMI) 2002 (Indirect)                         | 0                                   |   |
|                                                   | Encuesta Nacional de Salud Materno Infantil (ENSMI) 2008-2009 (Direct)                      | 1                                   |   |
|                                                   | Demographic and Health Survey 2014-2015 (Direct)                                            | 1                                   |   |
|                                                   | Census 2018 (Indirect)                                                                      | 1                                   |   |
|                                                   | UNPD Demographic Yearbook Data 2020 version 2020 (VR)                                       | 0                                   |   |
|                                                   | VR Submitted to WHO/UNIGME 2020 version 2020 (VR)                                           | 0                                   |   |
|                                                   | Guinea                                                                                      | Survey 1954-1955 (Household Deaths) | 1 |
|                                                   |                                                                                             | Survey 1954-1955 (Indirect)         | 1 |
|                                                   |                                                                                             | Census 1983 (Household Deaths)      | 0 |
| Demographic and Health Survey 1992 (Direct)       |                                                                                             | 1                                   |   |
| Demographic and Health Survey 1992 (Indirect)     |                                                                                             | 0                                   |   |
| Census 1996 (Household Deaths)                    |                                                                                             | 0                                   |   |
| Census 1996 (Indirect)                            |                                                                                             | 1                                   |   |
| Demographic and Health Survey 1999 (Direct)       |                                                                                             | 1                                   |   |
| Demographic and Health Survey 1999 (Indirect)     |                                                                                             | 0                                   |   |
| Multiple Indicator Cluster Survey 2003 (Indirect) |                                                                                             | 1                                   |   |
| Demographic and Health Survey 2005 (Direct)       |                                                                                             | 1                                   |   |
| Demographic and Health Survey 2005 (Indirect)     |                                                                                             | 0                                   |   |
| Demographic and Health Survey 2012 (Direct)       |                                                                                             | 1                                   |   |
| Census 2014 (Household Deaths)                    |                                                                                             | 0                                   |   |
| Census 2014 (Indirect)                            |                                                                                             | 1                                   |   |
| Multiple Indicator Cluster Survey 2016 (Direct)   |                                                                                             | 0                                   |   |
| Demographic and Health Survey 2018 (Direct)       |                                                                                             | 1                                   |   |
| Guinea-Bissau                                     | Census 1950 (Indirect)                                                                      | 0                                   |   |
|                                                   | Multiple Indicator Cluster Survey 2000 (Indirect)                                           | 1                                   |   |
|                                                   | Multiple Indicator Cluster Survey 2006 (Indirect)                                           | 1                                   |   |
|                                                   | Multiple Indicator Cluster Survey 2010 (Direct)                                             | 1                                   |   |
|                                                   | Multiple Indicator Cluster Survey 2010 (Indirect)                                           | 0                                   |   |
| Guyana                                            | Multiple Indicator Cluster Survey 2014 (Direct)                                             | 1                                   |   |
|                                                   | World Fertility Survey 1975 (Direct)                                                        | 1                                   |   |
|                                                   | World Fertility Survey 1975 (Indirect)                                                      | 0                                   |   |
|                                                   | Multiple Indicator Cluster Survey 2000-2001 (Indirect)                                      | 1                                   |   |
|                                                   | Census 2002 (Indirect)                                                                      | 1                                   |   |
|                                                   | AIDS Indicator Survey 2005 (Direct)                                                         | 1                                   |   |

|          | <b>Data series</b>                                                     | <b>Inclusion</b> |
|----------|------------------------------------------------------------------------|------------------|
|          | AIDS Indicator Survey 2005 (Indirect)                                  | 0                |
|          | Multiple Indicator Cluster Survey 2006 (Indirect)                      | 1                |
|          | Demographic and Health Survey 2009 (Direct)                            | 1                |
|          | Census 2012 (Household Deaths)                                         | 0                |
|          | Multiple Indicator Cluster Survey 2014 (Direct)                        | 1                |
|          | VR Submitted to WHO/UNIGME 2020 version 2020 (VR)                      | 0                |
| Haiti    | Census 1971 (Direct)                                                   | 0                |
|          | Census 1971 (Household Deaths)                                         | 0                |
|          | World Fertility Survey 1977 (Direct)                                   | 1                |
|          | World Fertility Survey 1977 (Indirect)                                 | 0                |
|          | Census 1982 (Indirect)                                                 | 1                |
|          | Contraceptive Prevalence Survey 1983 (Indirect)                        | 1                |
|          | Mortality, morbidity and service utilization survey 1987 (Direct)      | 1                |
|          | Mortality, morbidity and service utilization survey 1987 (Indirect)    | 0                |
|          | Demographic and Health Survey 1994-1995 (Direct)                       | 1                |
|          | Demographic and Health Survey 1994-1995 (Indirect)                     | 0                |
|          | Demographic and Health Survey 2000 (Direct)                            | 1                |
|          | Demographic and Health Survey 2000 (Indirect)                          | 0                |
|          | Census 2003 (Household Deaths)                                         | 0                |
|          | Census 2003 (Indirect)                                                 | 0                |
|          | Demographic and Health Survey 2005-2006 (Direct)                       | 1                |
|          | Demographic and Health Survey 2005-2006 (Indirect)                     | 0                |
|          | Demographic and Health Survey 2012 (Direct)                            | 1                |
|          | Demographic and Health Survey 2016-2017 (Direct)                       | 1                |
|          | VR Submitted to WHO/UNIGME 2020 version 2020 (VR)                      | 0                |
| Honduras | National Demographic Survey 1970-1972 (Household Deaths)               | 0                |
|          | National Demographic Survey 1972 (Direct)                              | 1                |
|          | National Demographic Survey 1972 (Indirect)                            | 1                |
|          | Census 1974 (Indirect)                                                 | 1                |
|          | National Demographic Survey 1983 (Indirect)                            | 1                |
|          | National Survey of Maternal and Child Health 1984 (Indirect)           | 1                |
|          | National Survey of Epidemiology and Family Health 1987 (Direct)        | 1                |
|          | National Survey of Epidemiology and Family Health 1987 (Indirect)      | 0                |
|          | Census 1988 (Indirect)                                                 | 1                |
|          | National Survey of Epidemiology and Family Health 1991-1992 (Direct)   | 1                |
|          | National Survey of Epidemiology and Family Health 1991-1992 (Indirect) | 0                |
|          | National Survey of Epidemiology and Family Health 1996 (Direct)        | 1                |
|          | National Survey of Epidemiology and Family Health 1996 (Indirect)      | 0                |
|          | Census 2001 (Household Deaths)                                         | 0                |
|          | Census 2001 (Indirect)                                                 | 1                |
|          | National Survey of Epidemiology and Family Health 2001 (Direct)        | 0                |
|          | Demographic and Health Survey 2005-2006 (Direct)                       | 1                |
|          | Demographic and Health Survey 2005-2006 (Indirect)                     | 0                |
|          | Demographic and Health Survey 2011-2012 (Direct)                       | 1                |
|          | Census 2013 (Household Deaths)                                         | 0                |
|          | Census 2013 (Indirect)                                                 | 1                |
|          | VR Submitted to WHO/UNIGME 2020 version 2020 (VR)                      | 0                |
| Hungary  | UNPD Demographic Yearbook Data 2020 version 2020 (VR)                  | 1                |
|          | VR Submitted to WHO/UNIGME 2020 version 2020 (VR)                      | 1                |
| Iceland  | Recalculated VR Submitted to WHO/UNIGME 2020 version 2020 (VR)         | 1                |
|          | UNPD Demographic Yearbook Data 2020 version 2020 (VR)                  | 1                |
|          | VR Submitted to WHO/UNIGME 2020 version 2020 (VR)                      | 0                |
| India    | National Sample Survey 1966 (Indirect)                                 | 1                |
|          | National Family Planning Survey 1970 (Indirect)                        | 1                |

|           | <b>Data series</b>                                          | <b>Inclusion</b> |
|-----------|-------------------------------------------------------------|------------------|
|           | National Fertility Survey 1972 (Indirect)                   | 1                |
|           | Survey on Infant and Child Mortality 1979 (Indirect)        | 0                |
|           | National Family Planning Survey 1980 (Indirect)             | 1                |
|           | Census 1981 (Indirect)                                      | 0                |
|           | Second All-India Family Planning Survey 1981 (Indirect)     | 1                |
|           | Census 1991 (Indirect)                                      | 0                |
|           | National Family Health Survey 1992-1993 (Direct)            | 1                |
|           | National Family Health Survey 1992-1993 (Indirect)          | 0                |
|           | National Family Health Survey 1998-1999 (Direct)            | 1                |
|           | National Family Health Survey 1998-1999 (Indirect)          | 0                |
|           | District Level Household Survey 1999 (Indirect)             | 1                |
|           | Census 2001 (Indirect)                                      | 0                |
|           | District Level Household Survey 2004 (Indirect)             | 1                |
|           | National Family Health Survey 2005-2006 (Direct)            | 1                |
|           | National Family Health Survey 2005-2006 (Indirect)          | 0                |
|           | District Level Household Survey 2008 (Indirect)             | 1                |
|           | Census 2011 (Indirect)                                      | 1                |
|           | National Family Health Survey 2015-2016 (Direct)            | 0                |
|           | Provincial Annual Sanitary-Health Reports 1947 (VR)         | 0                |
|           | Sample Registration System 2017 (VR)                        | 1                |
|           | Sample Registration System 2018 (VR)                        | 1                |
| Indonesia | National Socio-economic Survey 1964-1965 (Household Deaths) | 0                |
|           | Census 1971 (Indirect)                                      | 1                |
|           | World Fertility Survey 1976 (Direct)                        | 1                |
|           | World Fertility Survey 1976 (Indirect)                      | 0                |
|           | Census 1980 (Indirect)                                      | 1                |
|           | Demographic and Health Survey 1987 (Direct)                 | 1                |
|           | Demographic and Health Survey 1987 (Indirect)               | 0                |
|           | Census 1990 (Indirect)                                      | 1                |
|           | Demographic and Health Survey 1991 (Direct)                 | 1                |
|           | Demographic and Health Survey 1991 (Indirect)               | 0                |
|           | Demographic and Health Survey 1994 (Direct)                 | 1                |
|           | Demographic and Health Survey 1994 (Indirect)               | 0                |
|           | Intercensal Survey 1995 (Indirect)                          | 0                |
|           | Demographic and Health Survey 1997 (Direct)                 | 1                |
|           | Demographic and Health Survey 1997 (Indirect)               | 0                |
|           | Census 2000 (Indirect)                                      | 1                |
|           | Demographic and Health Survey 2002-2003 (Direct)            | 1                |
|           | Demographic and Health Survey 2002-2003 (Indirect)          | 0                |
|           | National Socio-Economic Survey (SUSENAS) 2003 (Indirect)    | 1                |
|           | National Socio-Economic Survey (SUSENAS) 2004 (Indirect)    | 1                |
|           | National Socio-Economic Survey (SUSENAS) 2005 (Indirect)    | 1                |
|           | National Socio-Economic Survey (SUSENAS) 2006 (Indirect)    | 1                |
|           | Demographic and Health Survey 2007 (Direct)                 | 1                |
|           | Demographic and Health Survey 2007 (Indirect)               | 0                |
|           | National Socio-Economic Survey (SUSENAS) 2007 (Indirect)    | 1                |
|           | National Socio-Economic Survey (SUSENAS) 2008 (Indirect)    | 1                |
|           | National Socio-Economic Survey (SUSENAS) 2009 (Indirect)    | 1                |
|           | Census 2010 (Household Deaths)                              | 0                |
|           | Census 2010 (Indirect)                                      | 1                |
|           | National Socio-Economic Survey (SUSENAS) 2010 (Indirect)    | 1                |
|           | Demographic and Health Survey 2012 (Direct)                 | 1                |
|           | Demographic and Health Survey 2017 (Direct)                 | 1                |
|           | Report on Sample Vital Registration System 2014 2014 (VR)   | 0                |

|                                                                                       | <b>Data series</b>                                                      | <b>Inclusion</b>                                  |   |
|---------------------------------------------------------------------------------------|-------------------------------------------------------------------------|---------------------------------------------------|---|
| Iran (Islamic Republic of)                                                            | Population Growth Survey 1973-1976 (Direct)                             | 1                                                 |   |
|                                                                                       | Population Growth Survey 1973-1976 (Indirect)                           | 0                                                 |   |
|                                                                                       | Population Health Survey 1974 (Direct)                                  | 1                                                 |   |
|                                                                                       | Iran National MICS 1985 (Household Deaths)                              | 1                                                 |   |
|                                                                                       | Census 1986 (Indirect)                                                  | 1                                                 |   |
|                                                                                       | Infant and Child Mortality Survey 1989 (Direct)                         | 1                                                 |   |
|                                                                                       | Infant and Child Mortality Survey 1989 (Indirect)                       | 0                                                 |   |
|                                                                                       | Intercensal Population Survey 1991 (Indirect)                           | 1                                                 |   |
|                                                                                       | Iran National MICS 1995 (Household Deaths)                              | 1                                                 |   |
|                                                                                       | Census 1996 (Indirect)                                                  | 1                                                 |   |
|                                                                                       | Demographic Survey 1998 (Indirect)                                      | 1                                                 |   |
|                                                                                       | Iran National MICS 1998 (Household Deaths)                              | 1                                                 |   |
|                                                                                       | Demographic and Health Survey 2000 (Direct)                             | 1                                                 |   |
|                                                                                       | Demographic and Health Survey 2000 (Indirect)                           | 0                                                 |   |
|                                                                                       | Census 2006 (Indirect)                                                  | 1                                                 |   |
|                                                                                       | National Multiple-Indicator Demographic and Health Survey 2010 (Direct) | 1                                                 |   |
|                                                                                       | Census 2016 (Indirect)                                                  | 0                                                 |   |
|                                                                                       | Iran National Child Mortality Surveillance System 2008 (VR)             | 1                                                 |   |
|                                                                                       | VR Submitted to WHO/UNIGME 2020 version 2020 (VR)                       | 0                                                 |   |
|                                                                                       | Iraq                                                                    | Census 1957 (Indirect)                            | 1 |
| Demographic Sample Survey and Sample Registration System 1973 (Direct)                |                                                                         | 1                                                 |   |
| Fertility Survey 1974 (Indirect)                                                      |                                                                         | 1                                                 |   |
| Census 1987 (Indirect)                                                                |                                                                         | 1                                                 |   |
| Gulf Child Health Survey 1989 (Direct)                                                |                                                                         | 0                                                 |   |
| Gulf Child Health Survey 1989 (Indirect)                                              |                                                                         | 1                                                 |   |
| Immunization, Diarrhoeal Disease, Maternal and Child Mortality Survey 1990 (Indirect) |                                                                         | 1                                                 |   |
| Infant and Child Mortality and Nutrition Survey 1991 (Direct)                         |                                                                         | 0                                                 |   |
| Census 1997 (Indirect)                                                                |                                                                         | 0                                                 |   |
| Child and Maternal Mortality Survey 1999 (Direct)                                     |                                                                         | 0                                                 |   |
| Living Conditions Survey 2004 (Direct)                                                |                                                                         | 1                                                 |   |
| Iraq Family Health Survey 2006 (Indirect)                                             |                                                                         | 1                                                 |   |
| Multiple Indicator Cluster Survey 2006 (Direct)                                       |                                                                         | 1                                                 |   |
| Multiple Indicator Cluster Survey 2006 (Indirect)                                     |                                                                         | 0                                                 |   |
| Multiple Indicator Cluster Survey 2011 (Direct)                                       |                                                                         | 1                                                 |   |
| Multiple Indicator Cluster Survey 2018 (Direct)                                       |                                                                         | 1                                                 |   |
| VR Submitted to WHO/UNIGME 2020 version 2020 (VR)                                     |                                                                         | 0                                                 |   |
| Ireland                                                                               |                                                                         | Census 2011 (Household Deaths)                    | 0 |
|                                                                                       |                                                                         | VR Submitted to WHO/UNIGME 2020 version 2020 (VR) | 1 |
| Israel                                                                                |                                                                         | National Life table 1969-1988 (Life Table)        | 0 |
|                                                                                       | UNPD Demographic Yearbook Data 2020 version 2020 (VR)                   | 1                                                 |   |
|                                                                                       | VR Submitted to WHO/UNIGME 2020 version 2020 (VR)                       | 1                                                 |   |
| Italy                                                                                 | VR Submitted to WHO/UNIGME 2020 version 2020 (VR)                       | 1                                                 |   |
| Jamaica                                                                               | National Life Tables (Life Table)                                       | 1                                                 |   |
|                                                                                       | Jamaica Fertility Survey 1975-1976 (Indirect)                           | 0                                                 |   |
|                                                                                       | World Fertility Survey 1975-1976 (Direct)                               | 1                                                 |   |
|                                                                                       | Census 1982 (Indirect)                                                  | 1                                                 |   |
|                                                                                       | Contraceptive Prevalence Survey 1989 (Direct)                           | 0                                                 |   |
|                                                                                       | Multiple Indicator Cluster Survey 2000 (Indirect)                       | 0                                                 |   |
|                                                                                       | Census 2001 (Indirect)                                                  | 0                                                 |   |
|                                                                                       | Multiple Indicator Cluster Survey 2005 (Indirect)                       | 1                                                 |   |
|                                                                                       | Reproductive Health Survey 2008-2009 (Direct)                           | 1                                                 |   |
|                                                                                       | Census 2011 (Indirect)                                                  | 1                                                 |   |
|                                                                                       | UNPD Demographic Yearbook Data 2020 version 2020 (VR)                   | 0                                                 |   |
|                                                                                       | VR Submitted to WHO/UNIGME 2020 version 2020 (VR)                       | 0                                                 |   |

|            | <b>Data series</b>                                                       | <b>Inclusion</b> |
|------------|--------------------------------------------------------------------------|------------------|
| Japan      | VR Submitted to WHO/UNIGME 2020 version 2020 (VR)                        | 1                |
| Jordan     | Census 1961 (Indirect)                                                   | 1                |
|            | Jordan Fertility Survey 1972 (Indirect)                                  | 1                |
|            | World Fertility Survey 1976 (Direct)                                     | 1                |
|            | World Fertility Survey 1976 (Indirect)                                   | 0                |
|            | Census 1979 (Indirect)                                                   | 1                |
|            | Jordan Demographic Survey 1981 (Indirect)                                | 1                |
|            | EPI/CDD and Child Mortality Survey 1988 (Indirect)                       | 1                |
|            | Demographic and Health Survey 1990 (Direct)                              | 1                |
|            | Demographic and Health Survey 1990 (Indirect)                            | 0                |
|            | EPI/CDD and Child Mortality Survey 1990 (Indirect)                       | 1                |
|            | Demographic and Health Survey 1997 (Direct)                              | 1                |
|            | Demographic and Health Survey 1997 (Indirect)                            | 0                |
|            | Annual Fertility Survey 1999 (Indirect)                                  | 1                |
|            | Demographic and Health Survey 2002 (Direct)                              | 1                |
|            | Demographic and Health Survey 2002 (Indirect)                            | 0                |
|            | Demographic and Health Survey 2007 (Direct)                              | 1                |
|            | Demographic and Health Survey 2007 (Indirect)                            | 0                |
|            | Demographic and Health Survey 2009 (Direct)                              | 1                |
|            | Demographic and Health Survey 2009 (Indirect)                            | 0                |
|            | Demographic and Health Survey 2012 (Direct)                              | 1                |
|            | Census 2015 (Household Deaths)                                           | 0                |
|            | Demographic and Health Survey 2017 (Direct)                              | 1                |
|            | VR Submitted to WHO/UNIGME 2020 version 2020 (VR)                        | 0                |
| Kazakhstan | Census 1989 (Indirect)                                                   | 1                |
|            | Demographic and Health Survey 1995 (Direct)                              | 1                |
|            | Demographic and Health Survey 1995 (Indirect)                            | 0                |
|            | Isms 1996 (Indirect)                                                     | 1                |
|            | Demographic and Health Survey 1999 (Direct)                              | 1                |
|            | Demographic and Health Survey 1999 (Indirect)                            | 0                |
|            | Census 1999 (Indirect)                                                   | 0                |
|            | Multiple Indicator Cluster Survey 2006 (Indirect)                        | 1                |
|            | Census 2009 (Indirect)                                                   | 1                |
|            | Multiple Indicator Cluster Survey 2010-2011 (Indirect)                   | 1                |
|            | Multiple Indicator Cluster Survey 2015 (Indirect)                        | 1                |
|            | Vital Registration Data from The Agency of Statistics of Kazakhstan (VR) | 0                |
|            | Transmonee Vital Registration Data 2008 version 2008 (VR)                | 0                |
|            | VR Submitted to WHO/UNIGME 2020 version 2020 (VR)                        | 1                |
| Kenya      | Census 1969 (Indirect)                                                   | 1                |
|            | Demographic Survey 1977 (Indirect)                                       | 1                |
|            | World Fertility Survey 1977-1978 (Direct)                                | 1                |
|            | World Fertility Survey 1977-1978 (Indirect)                              | 0                |
|            | Census 1979 (Indirect)                                                   | 1                |
|            | Demographic Survey 1983 (Indirect)                                       | 1                |
|            | Demographic and Health Survey 1989 (Direct)                              | 0                |
|            | Demographic and Health Survey 1989 (Indirect)                            | 0                |
|            | Demographic and Health Survey (MM adjusted) 1989 (Direct)                | 1                |
|            | Census 1989 (Indirect)                                                   | 1                |
|            | Demographic and Health Survey 1993 (Direct)                              | 0                |
|            | Demographic and Health Survey 1993 (Indirect)                            | 0                |
|            | Demographic and Health Survey (MM adjusted) 1993 (Direct)                | 1                |
|            | Demographic and Health Survey 1998 (Direct)                              | 0                |
|            | Demographic and Health Survey 1998 (Indirect)                            | 0                |
|            | Demographic and Health Survey (MM adjusted) 1998 (Direct)                | 1                |

|                                  | <b>Data series</b>                                             | <b>Inclusion</b> |
|----------------------------------|----------------------------------------------------------------|------------------|
|                                  | Census 1999 (Indirect)                                         | 1                |
|                                  | Multiple Indicator Cluster Survey 2000 (Indirect)              | 1                |
|                                  | Demographic and Health Survey 2003 (Direct)                    | 0                |
|                                  | Demographic and Health Survey 2003 (Indirect)                  | 0                |
|                                  | Demographic and Health Survey (MM adjusted) 2003 (Direct)      | 1                |
|                                  | Demographic and Health Survey 2008-2009 (Direct)               | 0                |
|                                  | Demographic and Health Survey 2008-2009 (Indirect)             | 0                |
|                                  | Demographic and Health Survey (MM adjusted) 2008-2009 (Direct) | 1                |
|                                  | Census 2009 (Household Deaths)                                 | 0                |
|                                  | Demographic and Health Survey 2014 (Direct)                    | 0                |
|                                  | Demographic and Health Survey (MM adjusted) 2014 (Direct)      | 1                |
|                                  | Malaria Indicator Survey 2015 (Indirect)                       | 1                |
| Kiribati                         | Census 1978 (Indirect)                                         | 1                |
|                                  | Census 1990 (Indirect)                                         | 1                |
|                                  | Census 1995 (Indirect)                                         | 1                |
|                                  | Census 2005 (Indirect)                                         | 1                |
|                                  | SPC Demographic and Health Survey 2009 (Direct)                | 1                |
|                                  | Census 2010 (Indirect)                                         | 1                |
|                                  | Census 2010 (Household Deaths)                                 | 0                |
|                                  | Multiple Indicator Cluster Survey 2018-2019 (Direct)           | 0                |
|                                  | VR Submitted to WHO/UNIGME 2020 version 2020 (VR)              | 0                |
| Kuwait                           | National Life Tables (Life Table)                              | 1                |
|                                  | Census 1975 (Indirect)                                         | 1                |
|                                  | Census 1980 (Indirect)                                         | 1                |
|                                  | Child Health Survey 1987 (Indirect)                            | 1                |
|                                  | UNPD Demographic Yearbook Data 2020 version 2020 (VR)          | 0                |
|                                  | VR Submitted to WHO/UNIGME 2020 version 2020 (VR)              | 1                |
| Kyrgyzstan                       | Census 1989 (Indirect)                                         | 0                |
|                                  | Demographic and Health Survey 1997 (Direct)                    | 1                |
|                                  | Demographic and Health Survey 1997 (Indirect)                  | 0                |
|                                  | Census 1999 (Indirect)                                         | 0                |
|                                  | Multiple Indicator Cluster Survey 2005-2006 (Indirect)         | 1                |
|                                  | Census 2009 (Indirect)                                         | 0                |
|                                  | Demographic and Health Survey 2012 (Direct)                    | 1                |
|                                  | Multiple Indicator Cluster Survey 2014 (Direct)                | 1                |
|                                  | Multiple Indicator Cluster Survey 2018 (Direct)                | 1                |
|                                  | VR Submitted to WHO/UNIGME 2020 version 2020 (VR)              | 1                |
| Lao People's Democratic Republic | Social Indicator Survey 1993 (Indirect)                        | 1                |
|                                  | Fertility and Birth Spacing Survey 1994 (Direct)               | 1                |
|                                  | Census 1995 (Indirect)                                         | 1                |
|                                  | Reproductive Health Survey 2000 (Direct)                       | 1                |
|                                  | Reproductive Health Survey 2005 (Direct)                       | 1                |
|                                  | Census 2005 (Indirect)                                         | 1                |
|                                  | Reproductive Health Survey 2005 (Indirect)                     | 0                |
|                                  | Lao Social Indicator Survey (combined MICS4/DHS) 2012 (Direct) | 1                |
|                                  | Census 2015 (Direct)                                           | 0                |
|                                  | Lao Social Indicator Survey 2017 (Direct)                      | 1                |
| Latvia                           | Recalculated VR Submitted to WHO/UNIGME 2020 version 2020 (VR) | 1                |
|                                  | VR Submitted to WHO/UNIGME 2020 version 2020 (VR)              | 0                |
| Lebanon                          | National Fertility and Family Planning Survey 1971 (Indirect)  | 1                |
|                                  | National EPI CDD IMR Survey 1990 (Indirect)                    | 1                |
|                                  | Population and Housing Survey 1996 (Indirect)                  | 1                |
|                                  | Maternal and Child Health Survey 1996 (Indirect)               | 1                |
|                                  | PAPCHILD Maternal and Child Health Survey 1996 (Direct)        | 1                |

|         | <b>Data series</b>                                              | <b>Inclusion</b> |
|---------|-----------------------------------------------------------------|------------------|
|         | Multiple Indicator Cluster Survey 2000 (Indirect)               | 1                |
|         | PAPFAM Family Health Survey 2004 (Direct)                       | 1                |
|         | Multiple Indicator Cluster Survey 2009 (Indirect)               | 1                |
|         | VR Submitted to WHO/UNIGME 2020 version 2020 (VR)               | 0                |
| Lesotho | ces 1968 (Indirect)                                             | 1                |
|         | Demographic Survey 1971-1973 (Household Deaths)                 | 0                |
|         | Demographic Survey 1971-1973 (Indirect)                         | 1                |
|         | Census 1976 (Indirect)                                          | 1                |
|         | World Fertility Survey 1977 (Direct)                            | 1                |
|         | World Fertility Survey 1977 (Indirect)                          | 0                |
|         | World Fertility Survey 1977 (Household Deaths)                  | 0                |
|         | Census 1986 (Household Deaths)                                  | 0                |
|         | Census 1986 (Indirect)                                          | 1                |
|         | Census 1996 (Household Deaths)                                  | 0                |
|         | Census 1996 (Indirect)                                          | 1                |
|         | Multiple Indicator Cluster Survey 2000 (Indirect)               | 1                |
|         | Demographic Survey 2001 (Household Deaths)                      | 0                |
|         | Demographic Survey 2001 (Indirect)                              | 1                |
|         | Demographic and Health Survey 2004 (Direct)                     | 0                |
|         | Demographic and Health Survey 2004 (Indirect)                   | 0                |
|         | Demographic and Health Survey (MM adjusted) 2004 (Direct)       | 1                |
|         | Census 2006 (Household Deaths)                                  | 0                |
|         | Census 2006 (Indirect)                                          | 1                |
|         | Demographic and Health Survey 2009 (Direct)                     | 0                |
|         | Demographic and Health Survey 2009 (Indirect)                   | 0                |
|         | Demographic and Health Survey (MM adjusted) 2009 (Direct)       | 1                |
|         | Demographic and Health Survey 2014 (Direct)                     | 0                |
|         | Demographic and Health Survey (MM adjusted) 2014 (Direct)       | 1                |
|         | Multiple Indicator Cluster Survey 2018 (Direct)                 | 0                |
|         | Multiple Indicator Cluster Survey (MM adjusted) 2018 (Direct)   | 1                |
| Liberia | Population Growth Survey 1969-1970 (Direct)                     | 0                |
|         | Population Growth Survey 1969-1970 (Indirect)                   | 0                |
|         | Population Growth Survey 1970-1971 (Direct)                     | 1                |
|         | Population Growth Survey 1970-1971 (Indirect)                   | 1                |
|         | Census 1974 (Indirect)                                          | 0                |
|         | Demographic and Health Survey 1986 (Direct)                     | 1                |
|         | Demographic and Health Survey 1986 (Indirect)                   | 0                |
|         | LDHS 1999-2000 (Direct)                                         | 0                |
|         | Demographic and Health Survey 2006-2007 (Direct)                | 1                |
|         | Demographic and Health Survey 2006-2007 (Indirect)              | 0                |
|         | Population and Housing Census 2008 (Household Deaths)           | 0                |
|         | Population and Housing Census 2008 (Indirect)                   | 0                |
|         | Malaria Indicator Survey 2008-2009 (Direct)                     | 1                |
|         | Malaria Indicator Survey 2008-2009 (Indirect)                   | 0                |
|         | Malaria Indicator Survey 2011 (Indirect)                        | 1                |
|         | Demographic and Health Survey 2013 (Direct)                     | 1                |
|         | Malaria Indicator Survey 2016 (Indirect)                        | 1                |
|         | Demographic and Health Survey (Preliminary) 2019-2020 (Direct)  | 1                |
| Libya   | Census 1973 (Indirect)                                          | 1                |
|         | PAPCHILD Maternal and Child Health Survey 1995 (Direct)         | 1                |
|         | Multiple Indicator Cluster Survey (Preliminary) 2003 (Indirect) | 1                |
|         | PAPFAM Family Health Survey 2007 (Direct)                       | 1                |
|         | PAPFAM Family Health Survey 2014 (Direct)                       | 0                |
|         | VR Data from Health and Environment Report 2009 2009 (VR)       | 1                |

|                                                                 | <b>Data series</b>                                                 | <b>Inclusion</b>                                      |
|-----------------------------------------------------------------|--------------------------------------------------------------------|-------------------------------------------------------|
| Lithuania                                                       | Census 2011 (Household Deaths)                                     | 0                                                     |
|                                                                 | VR Submitted to WHO/UNIGME 2020 version 2020 (VR)                  | 1                                                     |
| Luxembourg                                                      | Recalculated VR Submitted to WHO/UNIGME 2020 version 2020 (VR)     | 1                                                     |
|                                                                 | UNPD Demographic Yearbook Data 2020 version 2020 (VR)              | 1                                                     |
|                                                                 | VR Submitted to WHO/UNIGME 2020 version 2020 (VR)                  | 0                                                     |
| Madagascar                                                      | Demographic Survey 1966 (Household Deaths)                         | 0                                                     |
|                                                                 | Madagascar Demographic Survey 1966 (Indirect)                      | 0                                                     |
|                                                                 | Demographic and Health Survey 1992 (Direct)                        | 1                                                     |
|                                                                 | Demographic and Health Survey 1992 (Indirect)                      | 0                                                     |
|                                                                 | Census 1993 (Household Deaths)                                     | 0                                                     |
|                                                                 | Multiple Indicator Cluster Survey 1995 (Indirect)                  | 1                                                     |
|                                                                 | Demographic and Health Survey 1997 (Direct)                        | 1                                                     |
|                                                                 | Demographic and Health Survey 1997 (Indirect)                      | 0                                                     |
|                                                                 | Multiple Indicator Cluster Survey 2000 (Indirect)                  | 1                                                     |
|                                                                 | Demographic and Health Survey 2003-2004 (Direct)                   | 1                                                     |
|                                                                 | Demographic and Health Survey 2003-2004 (Indirect)                 | 0                                                     |
|                                                                 | Demographic and Health Survey 2008-2009 (Direct)                   | 1                                                     |
|                                                                 | Demographic and Health Survey 2008-2009 (Indirect)                 | 0                                                     |
|                                                                 | Malaria Indicator Survey 2011 (Indirect)                           | 0                                                     |
|                                                                 | National Survey on Monitoring the MDGs (ENSOMD) 2012-2013 (Direct) | 0                                                     |
|                                                                 | Malaria Indicator Survey 2013 (Indirect)                           | 1                                                     |
|                                                                 | Malaria Indicator Survey 2016 (Indirect)                           | 1                                                     |
|                                                                 | Multiple Indicator Cluster Survey 2018 (Direct)                    | 1                                                     |
|                                                                 | Malawi                                                             | Population Change Survey 1970-1972 (Household Deaths) |
| Population Change Survey 1970-1972 (Direct)                     |                                                                    | 1                                                     |
| Population Change Survey 1970-1972 (Indirect)                   |                                                                    | 0                                                     |
| Census 1977 (Household Deaths)                                  |                                                                    | 0                                                     |
| Census 1977 (Indirect)                                          |                                                                    | 1                                                     |
| Demographic Survey 1982 (Indirect)                              |                                                                    | 1                                                     |
| Family Formation Survey 1984 (Direct)                           |                                                                    | 1                                                     |
| Family Formation Survey 1984 (Household Deaths)                 |                                                                    | 0                                                     |
| Family Formation Survey 1984 (Indirect)                         |                                                                    | 0                                                     |
| Census 1987 (Household Deaths)                                  |                                                                    | 0                                                     |
| Census 1987 (Indirect)                                          |                                                                    | 1                                                     |
| Demographic and Health Survey 1992 (Direct)                     |                                                                    | 0                                                     |
| Demographic and Health Survey 1992 (Indirect)                   |                                                                    | 0                                                     |
| Demographic and Health Survey (MM adjusted) 1992 (Direct)       |                                                                    | 1                                                     |
| Census 1998 (Household Deaths)                                  |                                                                    | 0                                                     |
| Census 1998 (Indirect)                                          |                                                                    | 1                                                     |
| Demographic and Health Survey 2000 (Direct)                     |                                                                    | 0                                                     |
| Demographic and Health Survey 2000 (Indirect)                   |                                                                    | 0                                                     |
| Demographic and Health Survey (MM adjusted) 2000 (Direct)       |                                                                    | 1                                                     |
| Demographic and Health Survey 2004 (Direct)                     |                                                                    | 0                                                     |
| Demographic and Health Survey 2004 (Indirect)                   |                                                                    | 0                                                     |
| Demographic and Health Survey (MM adjusted) 2004 (Direct)       |                                                                    | 1                                                     |
| Second Integrated Household Survey 2004-2005 (Household Deaths) |                                                                    | 0                                                     |
| Multiple Indicator Cluster Survey 2006 (Direct)                 |                                                                    | 0                                                     |
| Multiple Indicator Cluster Survey 2006 (Indirect)               |                                                                    | 0                                                     |
| Multiple Indicator Cluster Survey (MM adjusted) 2006 (Direct)   |                                                                    | 1                                                     |
| Census 2008 (Household Deaths)                                  |                                                                    | 0                                                     |
| Census 2008 (Indirect)                                          |                                                                    | 1                                                     |
| Demographic and Health Survey 2010 (Direct)                     |                                                                    | 0                                                     |
| Demographic and Health Survey (MM adjusted) 2010 (Direct)       |                                                                    | 1                                                     |
| Demographic and Health Survey 2010 (Household Deaths)           | 0                                                                  |                                                       |



|          | <b>Data series</b>                                                                   | <b>Inclusion</b> |
|----------|--------------------------------------------------------------------------------------|------------------|
|          | Third Integrated Household Survey 2010-2011 (Household Deaths)                       | 0                |
|          | Malaria Indicator Survey 2012 (Indirect)                                             | 0                |
|          | MDG Endline Survey 2013-2014 (Direct)                                                | 0                |
|          | MDG Endline Survey (MM adjusted) 2013-2014 (Direct)                                  | 1                |
|          | Malaria Indicator Survey 2014 (Indirect)                                             | 1                |
|          | Demographic and Health Survey 2015-2016 (Direct)                                     | 0                |
|          | Demographic and Health Survey (MM adjusted) 2015-2016 (Direct)                       | 1                |
|          | Malaria Indicator Survey 2017 (Indirect)                                             | 1                |
|          | Census 2018 (Indirect)                                                               | 1                |
| Malaysia | National Life Table (Life Table)                                                     | 1                |
|          | Census 1970 (Indirect)                                                               | 1                |
|          | World Fertility Survey 1974 (Direct)                                                 | 1                |
|          | Vital Registration Data from Department of Statistics 2017 (VR)                      | 0                |
|          | Vital Registration Data from Department of Statistics 2019 (VR)                      | 1                |
|          | VR Submitted to WHO/UNIGME 2020 version 2020 (VR)                                    | 1                |
| Maldives | Census 1977 (Indirect)                                                               | 1                |
|          | Census 1985 (Indirect)                                                               | 1                |
|          | Census 1990 (Indirect)                                                               | 1                |
|          | Census 1995 (Indirect)                                                               | 1                |
|          | Poverty and Vulnerability Survey 1997 (Indirect)                                     | 1                |
|          | Census 2000 (Indirect)                                                               | 1                |
|          | Vulnerability and Poverty Assessment 2004 (Indirect)                                 | 1                |
|          | Census 2006 (Indirect)                                                               | 1                |
|          | Demographic and Health Survey 2009 (Direct)                                          | 1                |
|          | Demographic and Health Survey 2009 (Indirect)                                        | 0                |
|          | Demographic and Health Survey 2016-2017 (Direct)                                     | 1                |
|          | Vital Registration data from Statistical Yearbook of Maldives 2005 version 2005 (VR) | 0                |
|          | Vital Statistics 2012 (VR)                                                           | 0                |
|          | Recalculated VR Submitted to WHO/UNIGME 2020 version 2020 (VR)                       | 1                |
|          | VR Submitted to WHO/UNIGME 2020 version 2020 (VR)                                    | 0                |
| Mali     | Survey 1957 (Indirect)                                                               | 0                |
|          | Survey 1960.5 (Indirect)                                                             | 0                |
|          | Census 1976 (Household Deaths)                                                       | 0                |
|          | Demographic and Health Survey 1987 (Direct)                                          | 1                |
|          | Demographic and Health Survey 1987 (Indirect)                                        | 0                |
|          | Census 1987 (Household Deaths)                                                       | 0                |
|          | Census 1987 (Indirect)                                                               | 0                |
|          | Demographic and Health Survey 1995-1996 (Direct)                                     | 1                |
|          | Demographic and Health Survey 1995-1996 (Indirect)                                   | 0                |
|          | Census 1998 (Household Deaths)                                                       | 0                |
|          | Census 1998 (Indirect)                                                               | 0                |
|          | Demographic and Health Survey 2001 (Direct)                                          | 1                |
|          | Demographic and Health Survey 2001 (Indirect)                                        | 0                |
|          | Demographic and Health Survey 2006 (Direct)                                          | 1                |
|          | Demographic and Health Survey 2006 (Indirect)                                        | 0                |
|          | Census 2009 (Indirect)                                                               | 1                |
|          | Census 2009 (Household Deaths)                                                       | 0                |
|          | Demographic and Health Survey 2012-2013 (Direct)                                     | 1                |
|          | Multiple Indicator Cluster Survey 2015 (Direct)                                      | 1                |
|          | Malaria Indicator Survey 2015 (Indirect)                                             | 1                |
|          | Demographic and Health Survey 2018 (Direct)                                          | 1                |
| Malta    | Recalculated VR Submitted to WHO/UNIGME 2020 version 2020 (VR)                       | 1                |
|          | UNPD Demographic Yearbook Data 2020 version 2020 (VR)                                | 1                |
|          | VR Submitted to WHO/UNIGME 2020 version 2020 (VR)                                    | 0                |

|                  | <b>Data series</b>                                                    | <b>Inclusion</b> |
|------------------|-----------------------------------------------------------------------|------------------|
| Marshall Islands | Census 1973 (Indirect)                                                | 1                |
|                  | Census 1980 (Indirect)                                                | 1                |
|                  | Women's Health Survey 1985 (Indirect)                                 | 1                |
|                  | Census 1988 (Indirect)                                                | 1                |
|                  | Census 1999 (Indirect)                                                | 1                |
|                  | Demographic and Health Survey 2007 (Direct)                           | 1                |
|                  | Demographic and Health Survey 2007 (Indirect)                         | 0                |
|                  | Census 2011 (Household Deaths)                                        | 1                |
|                  | Census 2011 (Indirect)                                                | 0                |
|                  | VR Submitted to WHO/UNIGME 2020 version 2020 (VR)                     | 0                |
| Mauritania       | Fouta-Toro-Survey 1957 (Indirect)                                     | 1                |
|                  | Survey 1964-1965 (Indirect)                                           | 0                |
|                  | Census 1977 (Indirect)                                                | 1                |
|                  | World Fertility Survey 1981-1982 (Direct)                             | 1                |
|                  | World Fertility Survey 1981-1982 (Indirect)                           | 0                |
|                  | Census 1988 (Household Deaths)                                        | 0                |
|                  | Census 1988 (Indirect)                                                | 1                |
|                  | Maternal and Child Health Survey 1990 (Direct)                        | 1                |
|                  | Maternal and Child Health Survey 1990 (Indirect)                      | 0                |
|                  | PAPCHILD Maternal and Child Health Survey 1990 (Direct)               | 1                |
|                  | Multiple Indicator Cluster Survey 1995 (Indirect)                     | 0                |
|                  | Demographic and Health Survey 2000-2001 (Direct)                      | 1                |
|                  | Demographic and Health Survey 2000-2001 (Indirect)                    | 0                |
|                  | EMIP survey 2003-2004 (Direct)                                        | 1                |
|                  | EMIP survey 2003-2004 (Indirect)                                      | 0                |
|                  | Multiple Indicator Cluster Survey 2007 (Indirect)                     | 1                |
|                  | Multiple Indicator Cluster Survey 2011 (Direct)                       | 0                |
|                  | Census 2013 (Indirect)                                                | 0                |
|                  | Census 2013 (Household Deaths)                                        | 0                |
|                  | Multiple Indicator Cluster Survey 2015 (Direct)                       | 0                |
| Mauritius        | UNPD Demographic Yearbook Data 2020 version 2020 (VR)                 | 1                |
|                  | VR Submitted to WHO/UNIGME 2020 version 2020 (VR)                     | 1                |
| Mexico           | World Fertility Survey 1976 (Direct)                                  | 1                |
|                  | World Fertility Survey 1976 (Indirect)                                | 0                |
|                  | Contraceptive Prevalence Survey 1979 (Indirect)                       | 1                |
|                  | Census 1980 (Indirect)                                                | 1                |
|                  | Demographic And Health Survey 1987 (Indirect)                         | 0                |
|                  | Demographic and Health Survey 1987 (Direct)                           | 1                |
|                  | Census 1990 (Indirect)                                                | 1                |
|                  | Encuesta Nacional de la Dinamica Demografica (ENADID) 1992 (Direct)   | 1                |
|                  | Encuesta Nacional de la Dinamica Demografica (ENADID) 1992 (Indirect) | 0                |
|                  | Encuesta Nacional de la Dinamica Demografica (ENADID) 1997 (Direct)   | 1                |
|                  | Census 2000 (Indirect)                                                | 1                |
|                  | Conteo 2005 (Indirect)                                                | 1                |
|                  | Encuesta Nacional de la Dinamica Demografica (ENADID) 2006 (Indirect) | 1                |
|                  | Encuesta Nacional de la Dinamica Demografica (ENADID) 2009 (Direct)   | 0                |
|                  | Census 2010 (Indirect)                                                | 1                |
|                  | Encuesta Nacional de la Dinamica Demografica (ENADID) 2014 (Direct)   | 1                |
|                  | Encuesta Nacional de la Dinamica Demografica (ENADID) 2014 (Indirect) | 0                |
|                  | Encuesta Intercensal 2015 (Indirect)                                  | 1                |
|                  | Encuesta Nacional de la Dinamica Demografica (ENADID) 2018 (Direct)   | 1                |
|                  | Vital Registration data from Mexico Ministry of Health 2018 (VR)      | 1                |
|                  | VR Submitted to WHO/UNIGME 2020 version 2020 (VR)                     | 0                |
|                  | Census 1994 (Indirect)                                                | 1                |

| Data series                      |                                                                                 | Inclusion |
|----------------------------------|---------------------------------------------------------------------------------|-----------|
| Micronesia (Federated States of) | Census 2000 (Indirect)                                                          | 1         |
| Monaco                           | VR Submitted to WHO/UNIGME 2020 version 2020 (VR)                               | 1         |
| Mongolia                         | Census 1989 (Indirect)                                                          | 0         |
|                                  | Demographic Survey 1994 (Indirect)                                              | 1         |
|                                  | Demographic Survey 1996 (Direct)                                                | 1         |
|                                  | Reproductive Health Survey 1998 (Direct)                                        | 1         |
|                                  | Reproductive Health Survey 1998 (Indirect)                                      | 0         |
|                                  | Multiple Indicator Cluster Survey 2000 (Indirect)                               | 1         |
|                                  | Reproductive Health Survey 2003 (Direct)                                        | 0         |
|                                  | Reproductive Health Survey 2003 (Indirect)                                      | 1         |
|                                  | Multiple Indicator Cluster Survey 2005 (Indirect)                               | 1         |
|                                  | Reproductive Health Survey 2008 (Direct)                                        | 0         |
|                                  | Reproductive Health Survey 2008 (Indirect)                                      | 1         |
|                                  | Multiple Indicator Cluster Survey 2010 (Indirect)                               | 1         |
|                                  | Social Indicator Sample Survey (SISS) 2013-2014 (Direct)                        | 1         |
|                                  | Multiple Indicator Cluster Survey 2018 (Direct)                                 | 0         |
|                                  | VR Submitted to WHO/UNIGME 2020 version 2020 (VR)                               | 1         |
| Montenegro                       | Vital Registration from Statistical Yearbook 2012 (VR)                          | 0         |
|                                  | Recalculated VR Submitted to WHO/UNIGME 2020 version 2020 (VR)                  | 1         |
|                                  | VR Submitted to WHO/UNIGME 2020 version 2020 (VR)                               | 0         |
| Morocco                          | World Fertility Survey 1980 (Direct)                                            | 1         |
|                                  | World Fertility Survey 1980 (Indirect)                                          | 0         |
|                                  | Census 1982 (Indirect)                                                          | 1         |
|                                  | Contraceptive Prevalence Survey 1983 (Indirect)                                 | 1         |
|                                  | Demographic and Health Survey 1987 (Direct)                                     | 1         |
|                                  | Demographic and Health Survey 1987 (Indirect)                                   | 0         |
|                                  | Demographic and Health Survey 1992 (Direct)                                     | 1         |
|                                  | Demographic and Health Survey 1992 (Indirect)                                   | 0         |
|                                  | Census 1994 (Indirect)                                                          | 1         |
|                                  | Demographic and Health Survey 1995 (Direct)                                     | 1         |
|                                  | Demographic and Health Survey 1995 (Indirect)                                   | 0         |
|                                  | PAPG ENSME grand-echantillon 1996 1996 (Direct)                                 | 0         |
|                                  | PAPCHILD Maternal and Child Health Survey 1997 (Direct)                         | 1         |
|                                  | Demographic and Health Survey 2003-2004 (Direct)                                | 1         |
|                                  | Demographic and Health Survey 2003-2004 (Indirect)                              | 0         |
|                                  | Census 2004 (Indirect)                                                          | 1         |
|                                  | National Demographic Survey with repeated passages 2009-2010 (Household Deaths) | 1         |
|                                  | National Survey on Population and Family Health 2011 (Direct)                   | 1         |
|                                  | National Survey on Population and Family Health 2018 (Direct)                   | 1         |
|                                  | VR Submitted to WHO/UNIGME 2020 version 2020 (VR)                               | 0         |
| Mozambique                       | Census 1940 (Indirect)                                                          | 0         |
|                                  | Census 1950 (Indirect)                                                          | 0         |
|                                  | Census 1970 (Indirect)                                                          | 0         |
|                                  | Census 1980 (Indirect)                                                          | 1         |
|                                  | Mozambique National Demographic Survey 1991 (Indirect)                          | 1         |
|                                  | Multiple Indicator Cluster Survey 1995 (Indirect)                               | 1         |
|                                  | Census 1997 (Household Deaths)                                                  | 0         |
|                                  | Demographic and Health Survey 1997 (Direct)                                     | 0         |
|                                  | Demographic and Health Survey 1997 (Indirect)                                   | 0         |
|                                  | Demographic and Health Survey (MM adjusted) 1997 (Direct)                       | 0         |
|                                  | Census 1997 (Indirect)                                                          | 1         |
|                                  | Demographic and Health Survey 2003-2004 (Direct)                                | 0         |

|         | <b>Data series</b>                                             | <b>Inclusion</b> |
|---------|----------------------------------------------------------------|------------------|
|         | Demographic and Health Survey 2003-2004 (Indirect)             | 0                |
|         | Demographic and Health Survey (MM adjusted) 2003-2004 (Direct) | 1                |
|         | Census 2007 (Household Deaths)                                 | 0                |
|         | Census 2007 (Indirect)                                         | 1                |
|         | Post-census Mortality Survey 2007-2008 (Direct)                | 0                |
|         | Multiple Indicator Cluster Survey 2008 (Direct)                | 0                |
|         | Multiple Indicator Cluster Survey (MM adjusted) 2008 (Direct)  | 1                |
|         | AIDS Indicator Survey 2009 (Indirect)                          | 1                |
|         | Demographic and Health Survey 2011 (Direct)                    | 0                |
|         | Demographic and Health Survey (MM adjusted) 2011 (Direct)      | 1                |
|         | AIDS Indicator Survey 2015 (Indirect)                          | 1                |
|         | Census 2017 (Household Deaths)                                 | 0                |
|         | Census 2017 (Indirect)                                         | 1                |
|         | Malaria Indicator Survey 2018 (Indirect)                       | 1                |
| Myanmar | Census 1983 (Indirect)                                         | 1                |
|         | Population Change and Fertility Survey 1991 (Direct)           | 1                |
|         | Fertility and Reproductive Health Survey 1997 (Direct)         | 1                |
|         | Fertility and Reproductive Health Survey 1997 (Indirect)       | 0                |
|         | National Mortality Survey 1999 (Household Deaths)              | 1                |
|         | Fertility and Reproductive Health Survey 2001 (Direct)         | 1                |
|         | Fertility and Reproductive Health Survey 2001 (Indirect)       | 0                |
|         | Under-Five Mortality Survey 2002 (Direct)                      | 1                |
|         | Fertility and Reproductive Health Survey 2007 (Direct)         | 1                |
|         | Fertility and Reproductive Health Survey 2007 (Indirect)       | 0                |
|         | Multiple Indicator Cluster Survey 2009-2010 (Direct)           | 1                |
|         | Multiple Indicator Cluster Survey 2009-2010 (Indirect)         | 0                |
|         | Census 2014 (Indirect)                                         | 1                |
|         | Demographic and Health Survey 2015-2016 (Direct)               | 1                |
|         | VR from Central Statistical Organization 2011 (VR)             | 0                |
| Namibia | Census 1991 (Indirect)                                         | 1                |
|         | Demographic and Health Survey 1992 (Direct)                    | 0                |
|         | Demographic and Health Survey 1992 (Indirect)                  | 0                |
|         | Demographic and Health Survey (MM adjusted) 1992 (Direct)      | 1                |
|         | Demographic and Health Survey 2000 (Direct)                    | 0                |
|         | Demographic and Health Survey 2000 (Indirect)                  | 0                |
|         | Demographic and Health Survey (MM adjusted) 2000 (Direct)      | 1                |
|         | Census 2001 (Household Deaths)                                 | 1                |
|         | Demographic and Health Survey 2006-2007 (Household Deaths)     | 0                |
|         | Demographic and Health Survey 2006-2007 (Direct)               | 0                |
|         | Demographic and Health Survey 2006-2007 (Indirect)             | 0                |
|         | Demographic and Health Survey (MM adjusted) 2006-2007 (Direct) | 1                |
|         | Census 2011 (Indirect)                                         | 1                |
|         | Census 2011 (Household Deaths)                                 | 0                |
|         | Demographic and Health Survey 2013 (Direct)                    | 0                |
|         | Demographic and Health Survey (MM adjusted) 2013 (Direct)      | 1                |
|         | Inter-censal Demographic Survey 2016 (Household Deaths)        | 0                |
|         | Inter-censal Demographic Survey 2016 (Indirect)                | 0                |
| Nauru   | Demographic and Health Survey 2007 (Direct)                    | 1                |
|         | Census 2011 (Indirect)                                         | 1                |
|         | Vital Registration Data and Census 2000 (VR)                   | 1                |
|         | Vital Statistics Report 2008-2013 (VR)                         | 0                |
|         | Vital Statistics Report (preliminary) 2015-2017 (VR)           | 0                |
|         | VR Submitted to WHO/UNIGME 2020 version 2020 (VR)              | 0                |
| Nepal   | Census 1971 (Indirect)                                         | 0                |

|             | <b>Data series</b>                                             | <b>Inclusion</b> |
|-------------|----------------------------------------------------------------|------------------|
|             | World Fertility Survey 1976 (Direct)                           | 1                |
|             | World Fertility Survey 1976 (Indirect)                         | 0                |
|             | Census 1981 (Indirect)                                         | 0                |
|             | Contraceptive Prevalence Survey 1981 (Indirect)                | 0                |
|             | Fertility and Family Planning Survey 1986 (Indirect)           | 0                |
|             | Census 1991 (Indirect)                                         | 0                |
|             | Fertility and Family Planning Survey 1991 (Direct)             | 1                |
|             | Fertility and Family Planning Survey 1991 (Indirect)           | 0                |
|             | Demographic and Health Survey 1996 (Direct)                    | 1                |
|             | Demographic and Health Survey 1996 (Indirect)                  | 0                |
|             | Demographic and Health Survey 2001 (Direct)                    | 1                |
|             | Demographic and Health Survey 2001 (Indirect)                  | 0                |
|             | Census 2001 (Household Deaths)                                 | 0                |
|             | Census 2001 (Indirect)                                         | 0                |
|             | Demographic and Health Survey 2006 (Direct)                    | 1                |
|             | Demographic and Health Survey 2006 (Indirect)                  | 0                |
|             | Demographic and Health Survey 2011 (Direct)                    | 1                |
|             | Multiple Indicator Cluster Survey 2014 (Direct)                | 1                |
|             | Demographic and Health Survey 2016 (Direct)                    | 1                |
| Netherlands | VR Submitted to WHO/UNIGME 2020 version 2020 (VR)              | 1                |
| New Zealand | Census 2006 (Household Deaths)                                 | 0                |
|             | VR Submitted to WHO/UNIGME 2020 version 2020 (VR)              | 1                |
| Nicaragua   | Census 1971 (Indirect)                                         | 1                |
|             | Enc.Demografica Nacional 1978 (Indirect)                       | 1                |
|             | Enc.Socio-Demografica Nicaraguense 1985 (Indirect)             | 1                |
|             | Family Health Survey 1992-1993 (Direct)                        | 1                |
|             | Family Health Survey 1992-1993 (Indirect)                      | 0                |
|             | Census 1995 (Household Deaths)                                 | 0                |
|             | Census 1995 (Indirect)                                         | 1                |
|             | Demographic and Health Survey 1998 (Direct)                    | 1                |
|             | Demographic and Health Survey 1998 (Indirect)                  | 0                |
|             | Demographic and Health Survey 2001 (Direct)                    | 1                |
|             | Demographic and Health Survey 2001 (Indirect)                  | 0                |
|             | Living Standards Measurement Survey 2001 (Household Deaths)    | 0                |
|             | Census 2005 (Household Deaths)                                 | 0                |
|             | Census 2005 (Indirect)                                         | 1                |
|             | Encuesta Nicaraguense de Demografia y Salud 2006-2007 (Direct) | 1                |
|             | Encuesta Nicaraguense de Demografia y Salud 2011-2012 (Direct) | 1                |
|             | UNPD Demographic Yearbook Data 2020 version 2020 (VR)          | 0                |
|             | VR Submitted to WHO/UNIGME 2020 version 2020 (VR)              | 1                |
| Niger       | Survey 1960 (Indirect)                                         | 0                |
|             | Census 1988 (Indirect)                                         | 0                |
|             | Demographic and Health Survey 1992 (Direct)                    | 1                |
|             | Demographic and Health Survey 1992 (Indirect)                  | 0                |
|             | Multiple Indicator Cluster Survey 1996 (Direct)                | 1                |
|             | Multiple Indicator Cluster Survey 1996 (Indirect)              | 0                |
|             | Demographic and Health Survey 1998 (Direct)                    | 1                |
|             | Demographic and Health Survey 1998 (Indirect)                  | 0                |
|             | Multiple Indicator Cluster Survey 2000 (Indirect)              | 1                |
|             | Census 2001 (Household Deaths)                                 | 0                |
|             | Census 2001 (Indirect)                                         | 0                |
|             | Demographic and Health Survey 2006 (Direct)                    | 1                |
|             | Demographic and Health Survey 2006 (Indirect)                  | 0                |

|         | <b>Data series</b>                                                                                          | <b>Inclusion</b> |
|---------|-------------------------------------------------------------------------------------------------------------|------------------|
|         | Child Survival and Mortality Survey New 2010 (Direct)                                                       | 1                |
|         | Demographic and Health Survey 2012 (Direct)                                                                 | 1                |
|         | Etude Nationale d'Evaluation des Indicateurs Socioeconomiques et Demographiques (Preliminary) 2015 (Direct) | 0                |
| Nigeria | Malumfashi DSS 1962-1977 (Household Deaths)                                                                 | 0                |
|         | Rural Demographic Sample Survey 1965-1966 (Household Deaths)                                                | 1                |
|         | Survey 1971-1973 (Indirect)                                                                                 | 0                |
|         | World Fertility Survey 1981-1982 (Direct)                                                                   | 0                |
|         | World Fertility Survey 1981-1982 (Indirect)                                                                 | 0                |
|         | Demographic and Health Survey 1986 (Direct)                                                                 | 0                |
|         | Demographic and Health Survey 1990 (Direct)                                                                 | 1                |
|         | Demographic and Health Survey 1990 (Indirect)                                                               | 0                |
|         | Multiple Indicator Cluster Survey 1995 (Indirect)                                                           | 0                |
|         | Demographic and Health Survey 1999 (Direct)                                                                 | 0                |
|         | Demographic and Health Survey 1999 (Indirect)                                                               | 0                |
|         | Multiple Indicator Cluster Survey 1999 (Indirect)                                                           | 0                |
|         | Demographic and Health Survey 2003 (Direct)                                                                 | 1                |
|         | Demographic and Health Survey 2003 (Indirect)                                                               | 0                |
|         | Multiple Indicator Cluster Survey 2007 (Indirect)                                                           | 0                |
|         | Demographic and Health Survey 2008 (Household Deaths)                                                       | 0                |
|         | Demographic and Health Survey 2008 (Direct)                                                                 | 1                |
|         | Demographic and Health Survey 2008 (Indirect)                                                               | 0                |
|         | GHS Panel Survey 2010 (Household Deaths)                                                                    | 0                |
|         | Malaria Indicator Survey 2010 (Direct)                                                                      | 1                |
|         | Multiple Indicator Cluster Survey 2011 (Indirect)                                                           | 1                |
|         | GHS Panel Survey 2012-2013 (Household Deaths)                                                               | 0                |
|         | Demographic and Health Survey 2013 (Household Deaths)                                                       | 0                |
|         | Demographic and Health Survey 2013 (Direct)                                                                 | 1                |
|         | Malaria Indicator Survey 2015 (Indirect)                                                                    | 0                |
|         | Multiple Indicator Cluster Survey 2016-2017 (Direct)                                                        | 0                |
|         | Demographic and Health Survey (Preliminary) 2018 (Direct)                                                   | 1                |
| Niue    | Vital Statistics Report 2012-2016 (VR)                                                                      | 0                |
|         | Recalculated VR Submitted to WHO/UNIGME 2020 version 2020 (VR)                                              | 1                |
|         | VR Submitted to WHO/UNIGME 2020 version 2020 (VR)                                                           | 0                |
| Norway  | VR Submitted to WHO/UNIGME 2020 version 2020 (VR)                                                           | 1                |
| Oman    | Socio-Demographic Survey in 5 towns 1975 (Indirect)                                                         | 1                |
|         | Socio-Demographic Survey 1977-1979 (Indirect)                                                               | 1                |
|         | Child Health Survey 1988 (Direct)                                                                           | 1                |
|         | Child Health Survey 1988 (Indirect)                                                                         | 0                |
|         | Census 1993 (Indirect)                                                                                      | 1                |
|         | Family Health Survey 1995 (Direct)                                                                          | 1                |
|         | Family Health Survey 1995 (Indirect)                                                                        | 0                |
|         | Comprehensive Health Survey for Evaluation and Reproductive Health 2000 (Indirect)                          | 1                |
|         | Census 2003 (Household Deaths)                                                                              | 1                |
|         | Census 2003 (Indirect)                                                                                      | 1                |
|         | Multiple Indicator Cluster Survey 2014 (Direct)                                                             | 0                |
|         | Data from Ministry of Health Annual Health Report 2012 (VR)                                                 | 0                |
|         | Data from Ministry of Health Annual Health Report 2013 (VR)                                                 | 1                |
|         | Data from Ministry of Health Annual Health Report 2014 (VR)                                                 | 1                |
|         | Data from Ministry of Health Annual Health Report 2015 (VR)                                                 | 1                |
|         | Data from Ministry of Health Annual Health Report 2016 (VR)                                                 | 1                |
|         | Data from Ministry of Health Annual Health Report 2017 (VR)                                                 | 1                |
|         | Data from Ministry of Health Annual Health Report 2018 (VR)                                                 | 1                |
|         | VR Submitted to WHO/UNIGME 2020 version 2020 (VR)                                                           | 0                |

|                                                                 | <b>Data series</b>                                                   | <b>Inclusion</b> |
|-----------------------------------------------------------------|----------------------------------------------------------------------|------------------|
| Pakistan                                                        | Population Growth Estimation Experiment 1962-1965 (Household Deaths) | 0                |
|                                                                 | Population Growth Estimation Experiment 1962-1965 (Direct)           | 1                |
|                                                                 | Population Growth Survey I 1971 (Direct)                             | 1                |
|                                                                 | World Fertility Survey 1975 (Direct)                                 | 1                |
|                                                                 | Population Growth Survey II 1976-1978 (Direct)                       | 1                |
|                                                                 | Labour Force and Migration Survey 1980 (Direct)                      | 1                |
|                                                                 | Census 1981 (Indirect)                                               | 1                |
|                                                                 | Contraceptive Prevalence Survey 1984 (Indirect)                      | 1                |
|                                                                 | Demographic Survey 1984 (Indirect)                                   | 0                |
|                                                                 | Demographic Survey 1988 (Direct)                                     | 1                |
|                                                                 | Demographic Survey 1988 (Indirect)                                   | 0                |
|                                                                 | Demographic and Health Survey 1990-1991 (Direct)                     | 1                |
|                                                                 | Demographic and Health Survey 1990-1991 (Indirect)                   | 0                |
|                                                                 | Living Standards Survey 1991 (Direct)                                | 1                |
|                                                                 | Living Standards Survey 1991 (Indirect)                              | 0                |
|                                                                 | Contraceptive Prevalence Survey 1993 (Indirect)                      | 0                |
|                                                                 | Contraceptive Prevalence Survey 1994-1995 (Indirect)                 | 1                |
|                                                                 | Integrated Household Survey 1996 (Indirect)                          | 1                |
|                                                                 | Pakistan Fertility and Family Planning Survey 1996 (Direct)          | 1                |
|                                                                 | Pakistan Fertility and Family Planning Survey 1996 (Indirect)        | 0                |
|                                                                 | Census 1998 (Indirect)                                               | 1                |
|                                                                 | Integrated Household Survey 1998 (Direct)                            | 1                |
|                                                                 | Integrated Household Survey 1998 (Indirect)                          | 0                |
|                                                                 | Reproductive Health and Family Planning Survey 2000-2001 (Direct)    | 1                |
|                                                                 | Reproductive Health and Family Planning Survey 2000-2001 (Indirect)  | 0                |
|                                                                 | Pakistan Demographic Survey 2000-2007 (Household Deaths)             | 1                |
|                                                                 | Integrated Household Survey 2001 (Direct)                            | 1                |
|                                                                 | Integrated Household Survey 2001 (Indirect)                          | 0                |
|                                                                 | Demographic and Health Survey 2006-2007 (Direct)                     | 1                |
|                                                                 | Demographic and Health Survey 2006-2007 (Indirect)                   | 0                |
|                                                                 | Demographic and Health Survey 2012-2013 (Direct)                     | 1                |
|                                                                 | Social & Living Standards Measurement Survey 2013-2014 (Direct)      | 1                |
|                                                                 | Demographic and Health Survey 2017-2018 (Direct)                     | 1                |
| Social & Living Standards Measurement Survey 2018-2019 (Direct) | 1                                                                    |                  |
| Pakistan Demographic Survey 1984-1999 (VR)                      | 1                                                                    |                  |
| Palau                                                           | Census 1995 (Indirect)                                               | 0                |
|                                                                 | Census 2000 (Indirect)                                               | 0                |
|                                                                 | Census 2005 (Indirect)                                               | 0                |
|                                                                 | Recalculated VR Submitted to WHO/UNIGME 2020 version 2020 (VR)       | 1                |
|                                                                 | VR Submitted to WHO/UNIGME 2020 version 2020 (VR)                    | 0                |
| Panama                                                          | TABLAS DE VIDA NACIONALES (Life Table)                               | 1                |
|                                                                 | World Fertility Survey 1975-1976 (Direct)                            | 1                |
|                                                                 | Encuesta Demografica Nacional 1975-1977 (Direct)                     | 0                |
|                                                                 | Encuesta Demografica Nacional 1975-1977 (Indirect)                   | 0                |
|                                                                 | Census 1980 (Indirect)                                               | 1                |
|                                                                 | Census 1990 (Indirect)                                               | 1                |
|                                                                 | Census 2000 (Household Deaths)                                       | 0                |
|                                                                 | Census 2000 (Indirect)                                               | 1                |
|                                                                 | Census 2010 (Indirect)                                               | 1                |
|                                                                 | Vital Registration and Census (VR)                                   | 0                |
|                                                                 | Vital Registration from National Statistical Institute (VR)          | 0                |
|                                                                 | UNPD Demographic Yearbook Data 2020 version 2020 (VR)                | 0                |
|                                                                 | VR Submitted to WHO/UNIGME 2020 version 2020 (VR)                    | 0                |
| Census 1971 (Indirect)                                          | 1                                                                    |                  |

|                                                        | <b>Data series</b>                                                          | <b>Inclusion</b>                        |   |
|--------------------------------------------------------|-----------------------------------------------------------------------------|-----------------------------------------|---|
| Papua New Guinea                                       | Census 1980 (Indirect)                                                      | 0                                       |   |
|                                                        | Demographic and Health Survey 1991 (Indirect)                               | 1                                       |   |
|                                                        | Demographic and Health Survey 1996 (Direct)                                 | 1                                       |   |
|                                                        | Demographic and Health Survey 1996 (Indirect)                               | 0                                       |   |
|                                                        | Census 2000 (Indirect)                                                      | 1                                       |   |
|                                                        | Demographic and Health Survey 2006 (Direct)                                 | 1                                       |   |
|                                                        | Demographic and Health Survey 2016-2018 (Direct)                            | 1                                       |   |
|                                                        | VR Submitted to WHO/UNIGME 2020 version 2020 (VR)                           | 0                                       |   |
| Paraguay                                               | Census 1972 (Indirect)                                                      | 1                                       |   |
|                                                        | National Survey of Contraceptive Use 1977 (Indirect)                        | 1                                       |   |
|                                                        | National Fertility Survey 1979 (Indirect)                                   | 0                                       |   |
|                                                        | World Fertility Survey 1979 (Direct)                                        | 1                                       |   |
|                                                        | Census 1982 (Indirect)                                                      | 1                                       |   |
|                                                        | Demographic and Health Survey 1990 (Direct)                                 | 1                                       |   |
|                                                        | Demographic and Health Survey 1990 (Indirect)                               | 0                                       |   |
|                                                        | Census 1992 (Indirect)                                                      | 1                                       |   |
|                                                        | National Survey of Demography and Reproductive Health 1995-1996 (Direct)    | 1                                       |   |
|                                                        | National Survey of Demography and Reproductive Health 1995-1996 (Indirect)  | 0                                       |   |
|                                                        | Census 2002 (Household Deaths)                                              | 0                                       |   |
|                                                        | Census 2002 (Indirect)                                                      | 1                                       |   |
|                                                        | Reproductive Health Survey 2004 (Direct)                                    | 1                                       |   |
|                                                        | Encuesta Nacional de Demografía y Salud Sexual y Reproductiva 2008 (Direct) | 1                                       |   |
|                                                        | Multiple Indicator Cluster Survey 2016 (Direct)                             | 0                                       |   |
|                                                        | VR Ministerio de Salud Pública y Bienestar Social 2016 (VR)                 | 0                                       |   |
|                                                        | VR Submitted to WHO/UNIGME 2020 version 2020 (VR)                           | 0                                       |   |
|                                                        | Peru                                                                        | Census 1972 (Indirect)                  | 1 |
|                                                        |                                                                             | Demographic Survey 1974-1976 (Direct)   | 1 |
|                                                        |                                                                             | Demographic Survey 1974-1976 (Indirect) | 0 |
| World Fertility Survey 1977-1978 (Direct)              |                                                                             | 1                                       |   |
| World Fertility Survey 1977-1978 (Indirect)            |                                                                             | 0                                       |   |
| Census 1981 (Indirect)                                 |                                                                             | 1                                       |   |
| Contraceptive Prevalence Survey 1981 (Indirect)        |                                                                             | 1                                       |   |
| Demographic and Health Survey 1986 (Direct)            |                                                                             | 1                                       |   |
| Demographic and Health Survey 1986 (Indirect)          |                                                                             | 0                                       |   |
| Demographic and Health Survey 1991-1992 (Direct)       |                                                                             | 1                                       |   |
| Demographic and Health Survey 1991-1992 (Indirect)     |                                                                             | 0                                       |   |
| Census 1993 (Indirect)                                 |                                                                             | 1                                       |   |
| Demographic and Health Survey 1996 (Direct)            |                                                                             | 1                                       |   |
| Demographic and Health Survey 1996 (Indirect)          |                                                                             | 0                                       |   |
| Demographic and Health Survey 2000 (Direct)            |                                                                             | 1                                       |   |
| Demographic and Health Survey 2000 (Indirect)          |                                                                             | 0                                       |   |
| Demographic and Health Survey 2004-2008 (Direct)       |                                                                             | 1                                       |   |
| Demographic and Health Survey 2004-2008 (Indirect)     |                                                                             | 0                                       |   |
| Census 2007 (Indirect)                                 |                                                                             | 1                                       |   |
| Demographic and Health Survey 2009 (Direct)            |                                                                             | 1                                       |   |
| Demographic and Health Survey 2010 (Direct)            |                                                                             | 1                                       |   |
| Demographic and Health Survey 2011 (Direct)            |                                                                             | 1                                       |   |
| Demographic and Health Survey 2012 (Direct)            |                                                                             | 1                                       |   |
| Demographic and Health Survey 2013 (Direct)            |                                                                             | 1                                       |   |
| National Demographic and Health Survey 2014 (Direct)   |                                                                             | 1                                       |   |
| National Demographic and Health Survey 2017 (Direct)   |                                                                             | 1                                       |   |
| Census 2017 (Indirect)                                 |                                                                             | 1                                       |   |
| National Demographic and Health Survey 2018 (Direct)   |                                                                             | 1                                       |   |
| Encuesta Demográfica y de Salud Familiar 2019 (Direct) |                                                                             | 1                                       |   |



|                             | <b>Data series</b>                                              | <b>Inclusion</b> |
|-----------------------------|-----------------------------------------------------------------|------------------|
|                             | Vital Registration (26 March 2009) 2009 (VR)                    | 0                |
|                             | VR Submitted to WHO/UNIGME 2020 version 2020 (VR)               | 0                |
| Philippines                 | Census 1970 (Indirect)                                          | 0                |
|                             | World Fertility Survey 1978 (Direct)                            | 1                |
|                             | Census 1980 (Indirect)                                          | 0                |
|                             | Demographic Survey 1988 (Indirect)                              | 1                |
|                             | Demographic and Health Survey 1993 (Direct)                     | 1                |
|                             | Demographic and Health Survey 1993 (Indirect)                   | 0                |
|                             | Demographic and Health Survey 1998 (Direct)                     | 1                |
|                             | Demographic and Health Survey 1998 (Indirect)                   | 0                |
|                             | Demographic and Health Survey 2003 (Direct)                     | 1                |
|                             | Demographic and Health Survey 2003 (Indirect)                   | 0                |
|                             | Family Planning Survey 2006 (Direct)                            | 0                |
|                             | Family Planning Survey 2006 (Indirect)                          | 1                |
|                             | Demographic and Health Survey 2008 (Direct)                     | 1                |
|                             | Demographic and Health Survey 2008 (Indirect)                   | 0                |
|                             | Family Health Survey 2011 (Direct)                              | 1                |
|                             | National Demographic and Health Survey 2013 (Direct)            | 1                |
|                             | Demographic and Health Survey 2017 (Direct)                     | 1                |
|                             | VR Submitted to WHO/UNIGME 2020 version 2020 (VR)               | 0                |
| Poland                      | Census 2011 (Household Deaths)                                  | 0                |
|                             | UNPD Demographic Yearbook Data 2020 version 2020 (VR)           | 1                |
|                             | VR Submitted to WHO/UNIGME 2020 version 2020 (VR)               | 1                |
| Portugal                    | World Fertility Survey 1979-1980 (Direct)                       | 0                |
|                             | Census 2011 (Household Deaths)                                  | 0                |
|                             | UNPD Demographic Yearbook Data 2020 version 2020 (VR)           | 1                |
|                             | VR Submitted to WHO/UNIGME 2020 version 2020 (VR)               | 1                |
| Qatar                       | Child Health Survey 1987 (Direct)                               | 1                |
|                             | Child Health Survey 1987 (Indirect)                             | 0                |
|                             | Gulf Family Health Survey 1998 (Direct)                         | 0                |
|                             | Gulf Family Health Survey 1998 (Indirect)                       | 0                |
|                             | Census 2004 (Indirect)                                          | 0                |
|                             | Statistics Authority, publication of vital statistics 2012 (VR) | 0                |
|                             | Vital Statistics, Annual Bulletin 2015 (VR)                     | 0                |
|                             | VR Submitted to WHO/UNIGME 2020 version 2020 (VR)               | 1                |
| Republic of Korea           | National Life Table (Life Table)                                | 0                |
|                             | National Life Table 1970-2015 (Life Table)                      | 1                |
|                             | Census 1970 (Indirect)                                          | 1                |
|                             | Korea Fertility Survey 1974 (Indirect)                          | 0                |
|                             | World Fertility Survey 1974 (Direct)                            | 1                |
|                             | Census 1975 (Indirect)                                          | 1                |
|                             | Census 1980 (Indirect)                                          | 1                |
|                             | Census 1985 (Indirect)                                          | 1                |
|                             | Census 1990 (Indirect)                                          | 1                |
|                             | VR Submitted to WHO/UNIGME 2020 version 2020 (VR)               | 1                |
| Republic of Moldova         | Census 1989 (Indirect)                                          | 1                |
|                             | Demographic and Health Survey 2005 (Direct)                     | 1                |
|                             | Demographic and Health Survey 2005 (Indirect)                   | 0                |
|                             | Multiple Indicator Cluster Survey 2012 (Direct)                 | 1                |
|                             | VR Submitted to WHO/UNIGME 2020 version 2020 (VR)               | 1                |
| Republic of North Macedonia | Multiple Indicator Cluster Survey 2005 (Indirect)               | 0                |
|                             | Multiple Indicator Cluster Survey 2018-2019 (Direct)            | 0                |
|                             | VR Submitted to WHO/UNIGME 2020 version 2020 (VR)               | 1                |
| Romania                     | Reproductive Health Survey 1999 (Direct)                        | 0                |

|                                  | <b>Data series</b>                                                              | <b>Inclusion</b>                                               |   |
|----------------------------------|---------------------------------------------------------------------------------|----------------------------------------------------------------|---|
|                                  | UNPD Demographic Yearbook Data 2020 version 2020 (VR)                           | 1                                                              |   |
|                                  | VR Submitted to WHO/UNIGME 2020 version 2020 (VR)                               | 1                                                              |   |
| Russian Federation               | Census 1989 (Indirect)                                                          | 1                                                              |   |
|                                  | Trans MONEE Vital Registration (VR)                                             | 0                                                              |   |
|                                  | VR Submitted to WHO/UNIGME 2020 version 2020 (VR)                               | 1                                                              |   |
| Rwanda                           | Demographic Survey 1970 (Indirect)                                              | 1                                                              |   |
|                                  | Census 1978 (Indirect)                                                          | 1                                                              |   |
|                                  | World Fertility Survey 1983 (Direct)                                            | 1                                                              |   |
|                                  | World Fertility Survey 1983 (Indirect)                                          | 0                                                              |   |
|                                  | Census 1991 (Indirect)                                                          | 1                                                              |   |
|                                  | Demographic and Health Survey 1992 (Direct)                                     | 0                                                              |   |
|                                  | Demographic and Health Survey 1992 (Indirect)                                   | 0                                                              |   |
|                                  | Demographic and Health Survey (MM adjusted) 1992 (Direct)                       | 1                                                              |   |
|                                  | Socio-demographic Survey 1996 (Indirect)                                        | 0                                                              |   |
|                                  | Demographic and Health Survey 2000 (Direct)                                     | 0                                                              |   |
|                                  | Demographic and Health Survey 2000 (Indirect)                                   | 0                                                              |   |
|                                  | Demographic and Health Survey (MM adjusted) 2000 (Direct)                       | 1                                                              |   |
|                                  | Census 2002 (Household Deaths)                                                  | 0                                                              |   |
|                                  | Census 2002 (Indirect)                                                          | 0                                                              |   |
|                                  | Demographic and Health Survey 2005 (Direct)                                     | 0                                                              |   |
|                                  | Demographic and Health Survey 2005 (Indirect)                                   | 0                                                              |   |
|                                  | Demographic and Health Survey (MM adjusted) 2005 (Direct)                       | 1                                                              |   |
|                                  | Demographic and Health Survey Adjusted by adding 20 points 2007-2008 (Indirect) | 0                                                              |   |
|                                  | Interim Demographic and Health Survey 2007-2008 (Direct)                        | 0                                                              |   |
|                                  | Interim Demographic and Health Survey (MM adjusted) 2007-2008 (Direct)          | 1                                                              |   |
|                                  | Demographic and Health Survey 2010 (Direct)                                     | 0                                                              |   |
|                                  | Demographic and Health Survey 2010 (Indirect)                                   | 0                                                              |   |
|                                  | Demographic and Health Survey (MM adjusted) 2010 (Direct)                       | 1                                                              |   |
|                                  | Census 2012 (Indirect)                                                          | 1                                                              |   |
|                                  | Census 2012 (Household Deaths)                                                  | 0                                                              |   |
|                                  | Malaria Indicator Survey 2013 (Indirect)                                        | 1                                                              |   |
|                                  | Demographic and Health Survey 2014-2015 (Direct)                                | 0                                                              |   |
|                                  | Demographic and Health Survey (MM adjusted) 2014-2015 (Direct)                  | 1                                                              |   |
|                                  | Saint Kitts and Nevis                                                           | Recalculated VR Submitted to WHO/UNIGME 2020 version 2020 (VR) | 1 |
|                                  |                                                                                 | VR Submitted to WHO/UNIGME 2020 version 2020 (VR)              | 0 |
| Saint Lucia                      | Recalculated VR Submitted to WHO/UNIGME 2020 version 2020 (VR)                  | 1                                                              |   |
|                                  | UNPD Demographic Yearbook Data 2020 version 2020 (VR)                           | 1                                                              |   |
|                                  | VR Submitted to WHO/UNIGME 2020 version 2020 (VR)                               | 0                                                              |   |
| Saint Vincent and the Grenadines | Recalculated VR Submitted to WHO/UNIGME 2020 version 2020 (VR)                  | 1                                                              |   |
|                                  | UNPD Demographic Yearbook Data 2020 version 2020 (VR)                           | 1                                                              |   |
|                                  | VR Submitted to WHO/UNIGME 2020 version 2020 (VR)                               | 0                                                              |   |
| Samoa                            | Census 1956 (Indirect)                                                          | 1                                                              |   |
|                                  | Census 1961 (Indirect)                                                          | 1                                                              |   |
|                                  | Census 1966 (Indirect)                                                          | 1                                                              |   |
|                                  | Census 1971 (Indirect)                                                          | 0                                                              |   |
|                                  | Census 1976 (Indirect)                                                          | 1                                                              |   |
|                                  | Demographic and Health Survey 1999 (Household Deaths)                           | 1                                                              |   |
|                                  | Demographic and Health Survey 1999 (Indirect)                                   | 1                                                              |   |
|                                  | Demographic and Vital Statistics Survey 2000 (Indirect)                         | 1                                                              |   |
|                                  | Population and Housing Census 2001 (Indirect)                                   | 1                                                              |   |
|                                  | Population and Housing Census 2006 (Household Deaths)                           | 0                                                              |   |
|                                  | Population and Housing Census 2006 (Indirect)                                   | 1                                                              |   |
|                                  | Demographic and Health Survey 2009 (Direct)                                     | 0                                                              |   |
|                                  | Demographic and Health Survey 2009 (Indirect)                                   | 0                                                              |   |

|                       | <b>Data series</b>                                             | <b>Inclusion</b> |
|-----------------------|----------------------------------------------------------------|------------------|
|                       | Population and Housing Census 2011 (Household Deaths)          | 1                |
|                       | Demographic and Health Survey 2014 (Direct)                    | 0                |
|                       | Population and Housing Census 2016 (Household Deaths)          | 0                |
|                       | Population and Housing Census 2016 (Indirect)                  | 1                |
|                       | VR Submitted to WHO/UNIGME 2020 version 2020 (VR)              | 0                |
| San Marino            | Recalculated VR Submitted to WHO/UNIGME 2020 version 2020 (VR) | 1                |
|                       | UNPD Demographic Yearbook Data 2020 version 2020 (VR)          | 0                |
|                       | VR Submitted to WHO/UNIGME 2020 version 2020 (VR)              | 0                |
| Sao Tome and Principe | Census 1980 (Indirect)                                         | 1                |
|                       | Census 1991 (Indirect)                                         | 1                |
|                       | Multiple Indicator Cluster Survey 2000 (Indirect)              | 1                |
|                       | Multiple Indicator Cluster Survey 2006 (Indirect)              | 0                |
|                       | Demographic and Health Survey 2008-2009 (Direct)               | 1                |
|                       | Demographic and Health Survey 2008-2009 (Indirect)             | 0                |
|                       | Census 2012 (Household Deaths)                                 | 0                |
|                       | Multiple Indicator Cluster Survey 2014 (Direct)                | 1                |
|                       | VR Submitted to WHO/UNIGME 2020 version 2020 (VR)              | 0                |
| Saudi Arabia          | Child Health Survey 1987 (Indirect)                            | 1                |
|                       | Family Health Survey 1996 (Indirect)                           | 1                |
|                       | Gulf Family Health Survey 1996 (Direct)                        | 0                |
|                       | Demographic Survey 1999 (Household Deaths)                     | 1                |
|                       | Demographic Survey 2000 (Household Deaths)                     | 1                |
|                       | Census 2004 (Household Deaths)                                 | 1                |
|                       | Demographic Survey 2007 (Household Deaths)                     | 1                |
|                       | Demographic Survey 2016 (Household Deaths)                     | 1                |
|                       | VR Submitted to WHO/UNIGME 2020 version 2020 (VR)              | 0                |
| Senegal               | Survey 1960-1961 (Indirect)                                    | 1                |
|                       | Multiround Survey 1970-1971 (Household Deaths)                 | 1                |
|                       | World Fertility Survey 1978 (Direct)                           | 1                |
|                       | World Fertility Survey 1978 (Indirect)                         | 0                |
|                       | Multiround Survey 1978-1979 (Household Deaths)                 | 1                |
|                       | Demographic and Health Survey 1986 (Direct)                    | 1                |
|                       | Demographic and Health Survey 1986 (Indirect)                  | 0                |
|                       | Demographic and Health Survey 1992-1993 (Direct)               | 1                |
|                       | Demographic and Health Survey 1992-1993 (Indirect)             | 0                |
|                       | Multiple Indicator Cluster Survey 1996 (Indirect)              | 0                |
|                       | Demographic and Health Survey 1997 (Direct)                    | 1                |
|                       | Demographic and Health Survey 1997 (Indirect)                  | 0                |
|                       | Demographic and Health Survey 1999-2000 (Direct)               | 1                |
|                       | Demographic and Health Survey 1999-2000 (Indirect)             | 0                |
|                       | Census 2002 (Household Deaths)                                 | 0                |
|                       | Census 2002 (Indirect)                                         | 0                |
|                       | Demographic and Health Survey 2005 (Direct)                    | 1                |
|                       | Demographic and Health Survey 2005 (Indirect)                  | 0                |
|                       | Malaria Indicator Survey 2006 (Indirect)                       | 1                |
|                       | Malaria Indicator Survey 2008-2009 (Direct)                    | 1                |
|                       | Malaria Indicator Survey 2008-2009 (Indirect)                  | 0                |
|                       | Demographic and Health Survey 2010-2011 (Direct)               | 1                |
|                       | Demographic and Health Survey 2012-2013 (Direct)               | 1                |
|                       | Census 2013 (Household Deaths)                                 | 0                |
|                       | Census 2013 (Indirect)                                         | 0                |
|                       | Demographic and Health Survey 2014 (Direct)                    | 1                |
|                       | Demographic and Health Survey 2015 (Direct)                    | 1                |
|                       | Demographic and Health Survey 2016 (Direct)                    | 1                |

|                 | <b>Data series</b>                                                                                                      | <b>Inclusion</b> |
|-----------------|-------------------------------------------------------------------------------------------------------------------------|------------------|
|                 | Demographic and Health Survey 2017 (Direct)                                                                             | 1                |
|                 | Demographic and Health Survey 2018 (Direct)                                                                             | 1                |
| Serbia          | Multiple Indicator Cluster Survey 2010 (Indirect)                                                                       | 0                |
|                 | Vital Registration data from Statistical Office of the Republic of Serbia and Institute of Public Health of Serbia (VR) | 0                |
|                 | VR Submitted to WHO/UNIGME 2020 version 2020 (VR)                                                                       | 1                |
| Seychelles      | Census 1960 (Household Deaths)                                                                                          | 0                |
|                 | Census 1960 (Indirect)                                                                                                  | 1                |
|                 | Census 1971 (Indirect)                                                                                                  | 1                |
|                 | Recalculated VR Submitted to WHO/UNIGME 2020 version 2020 (VR)                                                          | 1                |
|                 | VR Submitted to WHO/UNIGME 2020 version 2020 (VR)                                                                       | 0                |
| Sierra Leone    | National Fertility Survey 1969 (Indirect)                                                                               | 0                |
|                 | Pilot Census 1973 (Indirect)                                                                                            | 1                |
|                 | Census 1974 (Indirect)                                                                                                  | 1                |
|                 | National Survey 1977 (Household Deaths)                                                                                 | 1                |
|                 | Census 1985 (Indirect)                                                                                                  | 1                |
|                 | DSMS 1992 (Household Deaths)                                                                                            | 1                |
|                 | DSMS 1992 (Indirect)                                                                                                    | 1                |
|                 | Multiple Indicator Cluster Survey 2000 (Indirect)                                                                       | 1                |
|                 | Pilot Census 2003 (Indirect)                                                                                            | 0                |
|                 | Census 2004 (Household Deaths)                                                                                          | 1                |
|                 | Census 2004 (Indirect)                                                                                                  | 1                |
|                 | Multiple Indicator Cluster Survey 2005-2006 (Indirect)                                                                  | 1                |
|                 | Demographic and Health Survey 2008 (Direct)                                                                             | 0                |
|                 | Demographic and Health Survey 2008 (Indirect)                                                                           | 0                |
|                 | Multiple Indicator Cluster Survey 2010 (Indirect)                                                                       | 1                |
|                 | Demographic and Health Survey 2013 (Direct)                                                                             | 1                |
|                 | Census 2015 (Household Deaths)                                                                                          | 0                |
|                 | Census 2015 (Indirect)                                                                                                  | 1                |
|                 | Malaria Indicator Survey 2016 (Indirect)                                                                                | 1                |
|                 | Multiple Indicator Cluster Survey 2017 (Direct)                                                                         | 0                |
|                 | Demographic and Health Survey 2019 (Direct)                                                                             | 1                |
|                 | VR from Health Management Information System 2012 (VR)                                                                  | 0                |
| Singapore       | UNPD Demographic Yearbook Data 2020 version 2020 (VR)                                                                   | 1                |
|                 | VR Submitted to WHO/UNIGME 2020 version 2020 (VR)                                                                       | 1                |
| Slovakia        | VR Submitted to WHO/UNIGME 2020 version 2020 (VR)                                                                       | 1                |
| Slovenia        | Recalculated VR Submitted to WHO/UNIGME 2020 version 2020 (VR)                                                          | 1                |
|                 | VR Submitted to WHO/UNIGME 2020 version 2020 (VR)                                                                       | 0                |
| Solomon Islands | Census 1976 (Indirect)                                                                                                  | 1                |
|                 | Census 1986 (Indirect)                                                                                                  | 1                |
|                 | Census 1999 (Indirect)                                                                                                  | 1                |
|                 | Demographic and Health Survey 2007 (Direct)                                                                             | 1                |
|                 | Demographic and Health Survey 2007 (Indirect)                                                                           | 0                |
|                 | Census 2009 (Indirect)                                                                                                  | 1                |
|                 | Census 2009 (Household Deaths)                                                                                          | 0                |
|                 | Demographic and Health Survey 2015 (Direct)                                                                             | 1                |
| Somalia         | Multiple Indicator Cluster Survey 1999 (Indirect)                                                                       | 1                |
|                 | Multiple Indicator Cluster Survey 2006 (Direct)                                                                         | 1                |
|                 | Multiple Indicator Cluster Survey 2006 (Indirect)                                                                       | 0                |
| South Africa    | Demographic and Health Survey 1987-1989 (Direct)                                                                        | 0                |
|                 | HSRC 1990 (Direct)                                                                                                      | 1                |
|                 | Household Survey 1993 (Household Deaths)                                                                                | 0                |
|                 | Household Survey 1995 (Household Deaths)                                                                                | 0                |
|                 | Household Survey 1996 (Household Deaths)                                                                                | 0                |

|                    | <b>Data series</b>                                                   | <b>Inclusion</b> |
|--------------------|----------------------------------------------------------------------|------------------|
|                    | Household Survey 1997 (Household Deaths)                             | 0                |
|                    | Demographic and Health Survey 1998 (Direct)                          | 0                |
|                    | Demographic and Health Survey 1998 (Indirect)                        | 0                |
|                    | Demographic and Health Survey (MM adjusted) 1998 (Direct)            | 1                |
|                    | Household Survey 1998 (Household Deaths)                             | 0                |
|                    | Census 2001 (Household Deaths)                                       | 1                |
|                    | Census 2001 (Indirect)                                               | 0                |
|                    | Demographic and Health Survey 2004 (Direct)                          | 0                |
|                    | Demographic and Health Survey (MM adjusted) 2004 (Direct)            | 0                |
|                    | Community Survey 2007 (Household Deaths)                             | 1                |
|                    | Census 2011 (Household Deaths)                                       | 0                |
|                    | Demographic and Health Survey 2016 (Direct)                          | 0                |
|                    | Demographic and Health Survey (MM adjusted) 2016 (Direct)            | 1                |
|                    | Rapid Mortality Surveillance (Preliminary) 2019 (VR)                 | 1                |
|                    | VR Submitted to WHO/UNIGME 2020 version 2020 (VR)                    | 0                |
| South Sudan        | Census 1955-1956 (Household Deaths)                                  | 1                |
|                    | Census 1973 (Indirect)                                               | 0                |
|                    | Census 1983 (Indirect)                                               | 0                |
|                    | UNICEF Survey 1985 (Indirect)                                        | 0                |
|                    | UNICEF Survey (Urban) 1985 (Indirect)                                | 0                |
|                    | Census 1993 (Household Deaths)                                       | 1                |
|                    | Census 1993 (Indirect)                                               | 1                |
|                    | Demography of Forced Migration Project DFMP survey 1999 (Indirect)   | 0                |
|                    | Sudan Household Health Survey 2006 (Household Deaths)                | 1                |
|                    | Sudan Household Health Survey 2006 (Indirect)                        | 0                |
|                    | Census 2008 (Household Deaths)                                       | 0                |
|                    | Census 2008 (Indirect)                                               | 1                |
|                    | Household Health Survey 2010 (Direct)                                | 0                |
| Spain              | VR Submitted to WHO/UNIGME 2020 version 2020 (VR)                    | 1                |
| Sri Lanka          | National life table (Life Table)                                     | 1                |
|                    | Census 1971 (Indirect)                                               | 1                |
|                    | World Fertility Survey 1975 (Direct)                                 | 1                |
|                    | World Fertility Survey 1975 (Indirect)                               | 0                |
|                    | Demographic and Health Survey 1987 (Direct)                          | 1                |
|                    | Demographic and Health Survey 1987 (Indirect)                        | 0                |
|                    | Demographic and Health Survey 1993 (Direct)                          | 1                |
|                    | Demographic and Health Survey 2000 (Direct)                          | 1                |
|                    | Demographic and Health Survey 2006 (Direct)                          | 1                |
|                    | Demographic and Health Survey 2006 (Indirect)                        | 0                |
|                    | Census 2012 (Indirect)                                               | 1                |
|                    | Demographic and Health Survey 2016 (Direct)                          | 1                |
|                    | VR Submitted to WHO/UNIGME 2020 version 2020 (VR)                    | 1                |
| State of Palestine | FALCOT-survey 1992 (Indirect)                                        | 1                |
|                    | Demographic Survey 1995 (Direct)                                     | 1                |
|                    | Demographic Survey 1995 (Indirect)                                   | 0                |
|                    | Census 1997 (Indirect)                                               | 1                |
|                    | Health Survey 2000 (Direct)                                          | 1                |
|                    | Health Survey 2000 (Indirect)                                        | 0                |
|                    | Demographic and Health Survey 2004 (Direct)                          | 1                |
|                    | Demographic and Health Survey 2004 (Indirect)                        | 0                |
|                    | PAPFAM Family Health Survey 2006 (Direct)                            | 1                |
|                    | PAPFAM Family Health Survey 2006 (Indirect)                          | 0                |
|                    | Census 2007 (Indirect)                                               | 1                |
|                    | Multiple Indicator Cluster Survey-Family Health Survey 2010 (Direct) | 1                |

|                      | <b>Data series</b>                                                    | <b>Inclusion</b> |
|----------------------|-----------------------------------------------------------------------|------------------|
|                      | Multiple Indicator Cluster Survey 2014 (Direct)                       | 1                |
|                      | Census 2017 (Indirect)                                                | 1                |
|                      | VR Submitted to WHO/UNIGME 2020 version 2020 (VR)                     | 0                |
| Sudan                | Census 1955-1956 (Household Deaths)                                   | 1                |
|                      | Census 1973 (Indirect)                                                | 1                |
|                      | World Fertility Survey 1978-1979 (Direct)                             | 1                |
|                      | World Fertility Survey (Household Survey) 1978-1979 (Indirect)        | 0                |
|                      | World Fertility Survey (Individual Survey) 1978-1979 (Indirect)       | 0                |
|                      | Census 1983 (Indirect)                                                | 1                |
|                      | Demographic and Health Survey 1989-1990 (Direct)                      | 1                |
|                      | Demographic and Health Survey 1989-1990 (Indirect)                    | 0                |
|                      | PAPCHILD Maternal and Child Health Survey 1992 (Direct)               | 1                |
|                      | Census 1993 (Household Deaths)                                        | 1                |
|                      | Census 1993 (Indirect)                                                | 1                |
|                      | Sudanese Maternal and Child Health Survey SMCHS 1993 (Indirect)       | 1                |
|                      | Safe Motherhood Survey 1999 (Direct)                                  | 1                |
|                      | Safe Motherhood Survey 1999 (Indirect)                                | 0                |
|                      | Sudan Household Health Survey 2006 (Household Deaths)                 | 1                |
|                      | Sudan Household Health Survey 2006 (Indirect)                         | 1                |
|                      | Census 2008 (Household Deaths)                                        | 0                |
|                      | Census 2008 (Indirect)                                                | 1                |
|                      | Multiple Indicator Cluster Survey 2010 (Direct)                       | 1                |
|                      | Multiple Indicator Cluster Survey 2014 (Direct)                       | 1                |
| Suriname             | Multiple Indicator Cluster Survey 1999-2000 (Indirect)                | 1                |
|                      | Census 2004 (Indirect)                                                | 0                |
|                      | Multiple Indicator Cluster Survey 2006 (Indirect)                     | 1                |
|                      | Multiple Indicator Cluster Survey 2018 (Direct)                       | 1                |
|                      | VR Submitted to WHO/UNIGME 2020 version 2020 (VR)                     | 0                |
| Sweden               | VR Submitted to WHO/UNIGME 2020 version 2020 (VR)                     | 1                |
| Switzerland          | VR Submitted to WHO/UNIGME 2020 version 2020 (VR)                     | 1                |
| Syrian Arab Republic | Census 1970 (Indirect)                                                | 1                |
|                      | Census 1976 (Indirect)                                                | 1                |
|                      | World Fertility Survey 1978 (Direct)                                  | 1                |
|                      | World Fertility Survey 1978 (Indirect)                                | 0                |
|                      | Census 1981 (Indirect)                                                | 1                |
|                      | EPI/CDD and Child Mortality Survey 1990 (Indirect)                    | 1                |
|                      | PAPCHILD Maternal and Child Health Survey 1993 (Direct)               | 1                |
|                      | Census 1994 (Indirect)                                                | 1                |
|                      | PAPFAM Family Health Survey 2001 (Direct)                             | 1                |
|                      | Population and Housing Census 2004 (Household Deaths)                 | 1                |
|                      | Multiple Indicator Cluster Survey 2006 (Indirect)                     | 1                |
|                      | Health survey for causes of child deaths 2007-2008 (Household Deaths) | 1                |
|                      | PAPFAM Family Health Survey 2009 (Direct)                             | 1                |
|                      | Health survey for causes of child deaths 2017-2018 (Household Deaths) | 0                |
|                      | Vital Registration/hospitals/funeral offices Data 2009 (VR)           | 0                |
|                      | VR Submitted to WHO/UNIGME 2020 version 2020 (VR)                     | 0                |
| Tajikistan           | Census 1989 (Indirect)                                                | 1                |
|                      | Tajikistan Living Standards Survey 1999 (Direct)                      | 1                |
|                      | Tajikistan Living Standards Survey 1999 (Indirect)                    | 0                |
|                      | Multiple Indicator Cluster Survey 2000 (Indirect)                     | 1                |
|                      | Demographic Survey 2002 (Direct)                                      | 1                |
|                      | Demographic Survey 2002 (Indirect)                                    | 0                |
|                      | Tajikistan Living Standards Survey 2003 (Direct)                      | 0                |
|                      | Tajikistan Living Standards Survey 2003 (Indirect)                    | 0                |

|             | <b>Data series</b>                                                                                                  | <b>Inclusion</b> |
|-------------|---------------------------------------------------------------------------------------------------------------------|------------------|
|             | Multiple Indicator Cluster Survey 2005 (Indirect)                                                                   | 1                |
|             | Tajikistan Living Standards Survey 2007 (Direct)                                                                    | 0                |
|             | Tajikistan Living Standards Survey 2007 (Indirect)                                                                  | 0                |
|             | Census 2010 (Indirect)                                                                                              | 0                |
|             | Survey on Infant, Child and Maternal Mortality 2010 (Direct)                                                        | 0                |
|             | Survey on Infant, Child and Maternal Mortality 2010 (Indirect)                                                      | 0                |
|             | Demographic and Health Survey 2012 (Direct)                                                                         | 1                |
|             | Demographic and Health Survey 2017 (Direct)                                                                         | 1                |
|             | Vital Registration data from Statistical Yearbook Health Status and Performance of Health Facilities 2010 2010 (VR) | 0                |
|             | Vital Registration data from State Agency for Statistics 2012 2012 (VR)                                             | 0                |
|             | VR Submitted to WHO/UNIGME 2020 version 2020 (VR)                                                                   | 1                |
| Thailand    | Life Table by Hill 1980-1990 Intercensal Death (Life Table)                                                         | 1                |
|             | Life Table by Hill 1990-2000 Intercensal Death (Life Table)                                                         | 1                |
|             | Life Table in 2002 by Hill (Life Table)                                                                             | 1                |
|             | National Life Tables (Life Table)                                                                                   | 1                |
|             | Census 1970 (Indirect)                                                                                              | 1                |
|             | Survey of Population Change 1974-1975 (Direct)                                                                      | 1                |
|             | Survey of Population Change 1974-1975 (Indirect)                                                                    | 0                |
|             | World Fertility Survey 1975 (Direct)                                                                                | 1                |
|             | World Fertility Survey 1975 (Indirect)                                                                              | 0                |
|             | National Fertility Survey 1979 (Indirect)                                                                           | 1                |
|             | Census 1980 (Indirect)                                                                                              | 1                |
|             | Contraceptive Prevalence Survey 1981 (Indirect)                                                                     | 1                |
|             | Contraceptive Prevalence Survey 1984 (Indirect)                                                                     | 1                |
|             | Survey of Population Change 1985-1986 (Direct)                                                                      | 1                |
|             | Survey of Population Change 1985-1986 (Indirect)                                                                    | 0                |
|             | Demographic and Health Survey 1987 (Direct)                                                                         | 1                |
|             | Demographic and Health Survey 1987 (Indirect)                                                                       | 0                |
|             | Survey of Population Change 1989 (Direct)                                                                           | 1                |
|             | Survey of Population Change 1989 (Indirect)                                                                         | 0                |
|             | Census 1990 (Indirect)                                                                                              | 0                |
|             | Survey of Population Change 1995-1996 (Direct)                                                                      | 1                |
|             | Survey of Population Change 1995-1996 (Indirect)                                                                    | 0                |
|             | Contraceptive Prevalence Survey 1996 (Indirect)                                                                     | 1                |
|             | Census 2000 (Indirect)                                                                                              | 1                |
|             | Multiple Indicator Cluster Survey 2005-2006 (Indirect)                                                              | 1                |
|             | Survey of Population Change 2005-2006 (Direct)                                                                      | 1                |
|             | Survey of Population Change 2005-2006 (Indirect)                                                                    | 0                |
|             | Census 2010 (Indirect)                                                                                              | 0                |
|             | Multiple Indicator Cluster Survey 2012-2013 (Indirect)                                                              | 1                |
|             | Survey of Population Change 2015-2016 (Indirect)                                                                    | 0                |
|             | Multiple Indicator Cluster Survey 2015-2016 (Indirect)                                                              | 0                |
|             | Vital Registration (VR)                                                                                             | 0                |
|             | Vital Registration from Ministry of Public Health 2015 (VR)                                                         | 0                |
|             | VR Submitted to WHO/UNIGME 2020 version 2020 (VR)                                                                   | 1                |
| Timor-Leste | Census 1990 (Indirect)                                                                                              | 0                |
|             | ICS 1995 (Indirect)                                                                                                 | 0                |
|             | Living Standards Survey 2001 (Indirect)                                                                             | 1                |
|             | Multiple Indicator Cluster Survey 2002 (Indirect)                                                                   | 1                |
|             | Demographic and Health Survey 2003 (Direct)                                                                         | 1                |
|             | Census 2004 (Indirect)                                                                                              | 1                |
|             | Demographic and Health Survey 2009-2010 (Direct)                                                                    | 1                |
|             | Census 2010 (Indirect)                                                                                              | 1                |

|                                                                  | <b>Data series</b>                                    | <b>Inclusion</b>                                         |
|------------------------------------------------------------------|-------------------------------------------------------|----------------------------------------------------------|
|                                                                  | Demographic and Health Survey 2016 (Direct)           | 0                                                        |
| Togo                                                             | Demographic survey 1961 (Household Deaths)            | 0                                                        |
|                                                                  | Demographic survey 1961 (Indirect)                    | 1                                                        |
|                                                                  | Demographic Survey 1971 (Indirect)                    | 1                                                        |
|                                                                  | Census 1981 (Household Deaths)                        | 0                                                        |
|                                                                  | Demographic and Health Survey 1988 (Direct)           | 1                                                        |
|                                                                  | Demographic and Health Survey 1988 (Indirect)         | 0                                                        |
|                                                                  | Demographic and Health Survey 1998 (Direct)           | 1                                                        |
|                                                                  | Demographic and Health Survey 1998 (Indirect)         | 0                                                        |
|                                                                  | Multiple Indicator Cluster Survey 2006 (Indirect)     | 1                                                        |
|                                                                  | Census 2010 (Household Deaths)                        | 0                                                        |
|                                                                  | Census 2010 (Indirect)                                | 1                                                        |
|                                                                  | Multiple Indicator Cluster Survey 2010 (Indirect)     | 1                                                        |
|                                                                  | Demographic and Health Survey 2013-2014 (Direct)      | 1                                                        |
|                                                                  | Multiple Indicator Cluster Survey 2017 (Direct)       | 1                                                        |
|                                                                  | Tonga                                                 | Census 1976 (Indirect)                                   |
| Census 1986 (Indirect)                                           |                                                       | 1                                                        |
| Census 1996 (Indirect)                                           |                                                       | 1                                                        |
| Census 2006 (Household Deaths)                                   |                                                       | 0                                                        |
| Census 2006 (Indirect)                                           |                                                       | 1                                                        |
| National Demographic and Health Survey 2012 (Direct)             |                                                       | 1                                                        |
| Multiple Indicator Cluster Survey (Preliminary) 2019 (Direct)    |                                                       | 1                                                        |
| Recalculated VR Submitted to WHO/UNIGME 2020 version 2020 (VR)   |                                                       | 0                                                        |
| VR Submitted to WHO/UNIGME 2020 version 2020 (VR)                |                                                       | 0                                                        |
| Trinidad and Tobago                                              | National Life Tables (Life Table)                     | 0                                                        |
|                                                                  | World Fertility Survey 1977 (Direct)                  | 1                                                        |
|                                                                  | World Fertility Survey 1977 (Indirect)                | 0                                                        |
|                                                                  | Demographic and Health Survey 1987 (Direct)           | 1                                                        |
|                                                                  | Demographic and Health Survey 1987 (Indirect)         | 0                                                        |
|                                                                  | Multiple Indicator Cluster Survey 2000 (Indirect)     | 1                                                        |
|                                                                  | Multiple Indicator Cluster Survey 2006 (Indirect)     | 1                                                        |
|                                                                  | Population and Housing Census 2011 (Indirect)         | 0                                                        |
|                                                                  | Multiple Indicator Cluster Survey 2011 (Indirect)     | 0                                                        |
|                                                                  | Preliminary MoH Vital Registration Data 2019 (VR)     | 0                                                        |
|                                                                  | UNPD Demographic Yearbook Data 2020 version 2020 (VR) | 0                                                        |
|                                                                  | VR Submitted to WHO/UNIGME 2020 version 2020 (VR)     | 0                                                        |
|                                                                  | Tunisia                                               | National Demographic Survey 1968-1969 (Household Deaths) |
| Census 1975 (Indirect)                                           |                                                       | 1                                                        |
| World Fertility Survey 1978 (Direct)                             |                                                       | 0                                                        |
| World Fertility Survey 1978 (Indirect)                           |                                                       | 0                                                        |
| Contraceptive Prevalence Survey 1983 (Indirect)                  |                                                       | 1                                                        |
| Census 1984 (Indirect)                                           |                                                       | 1                                                        |
| Demographic and Health Survey 1988 (Direct)                      |                                                       | 1                                                        |
| Demographic and Health Survey 1988 (Indirect)                    |                                                       | 0                                                        |
| PAPCHILD Maternal and Child Health Survey 1994 (Direct)          |                                                       | 1                                                        |
| PAPFAM Family Health Survey 2001 (Direct)                        |                                                       | 1                                                        |
| Census 2004 (Indirect)                                           |                                                       | 1                                                        |
| Multiple Indicator Cluster Survey 2011-2012 (Direct)             |                                                       | 1                                                        |
| Census 2014 (Indirect)                                           |                                                       | 0                                                        |
| Multiple Indicator Cluster Survey 2018 (Direct)                  |                                                       | 0                                                        |
| Vital Registration from Institut National de la Statistique (VR) |                                                       | 1                                                        |
| VR Submitted to WHO/UNIGME 2020 version 2020 (VR)                |                                                       | 1                                                        |
| Turkey                                                           |                                                       | Turkey Demographic Survey 1967 (Direct)                  |
|                                                                  | Turkey Demographic Survey 1967 (Indirect)             | 0                                                        |



|              | <b>Data series</b>                                             | <b>Inclusion</b> |
|--------------|----------------------------------------------------------------|------------------|
|              | Census 1970 (Indirect)                                         | 1                |
|              | Census 1975 (Indirect)                                         | 1                |
|              | Turkey Fertility Survey 1978 (Indirect)                        | 0                |
|              | World Fertility Survey 1978 (Direct)                           | 1                |
|              | Census 1980 (Indirect)                                         | 1                |
|              | Turkey Population and Health Survey 1983 (Indirect)            | 1                |
|              | Census 1985 (Indirect)                                         | 1                |
|              | Turkey Population and Health Survey 1988 (Direct)              | 1                |
|              | Turkey Population and Health Survey 1988 (Indirect)            | 0                |
|              | Demographic Survey 1989 (Indirect)                             | 1                |
|              | Census 1990 (Indirect)                                         | 1                |
|              | Demographic and Health Survey 1993 (Direct)                    | 1                |
|              | Demographic and Health Survey 1993 (Indirect)                  | 0                |
|              | Demographic and Health Survey 1998 (Direct)                    | 1                |
|              | Demographic and Health Survey 1998 (Indirect)                  | 0                |
|              | National Verbal Autopsy Survey 2003 (Household Deaths)         | 0                |
|              | Demographic and Health Survey 2003-2004 (Direct)               | 1                |
|              | Demographic and Health Survey 2003-2004 (Indirect)             | 0                |
|              | Demographic and Health Survey 2008 (Direct)                    | 1                |
|              | Turkey Child Mortality Survey 2010 (Direct)                    | 0                |
|              | Turkey Child Mortality Survey 2012 (Direct)                    | 0                |
|              | Demographic and Health Survey 2013 (Direct)                    | 1                |
|              | Demographic and Health Survey 2018 (Indirect)                  | 0                |
|              | VR Submitted to WHO/UNIGME 2020 version 2020 (VR)              | 1                |
| Turkmenistan | Demographic and Health Survey 2000 (Direct)                    | 1                |
|              | Demographic and Health Survey 2000 (Indirect)                  | 0                |
|              | Multiple Indicator Cluster Survey 2006 (Indirect)              | 1                |
|              | Multiple Indicator Cluster Survey 2015-2016 (Direct)           | 0                |
|              | Multiple Indicator Cluster Survey 2019 (Direct)                | 1                |
|              | Vital Registration (VR)                                        | 0                |
|              | Transmonee Vital Registration Data 2008 version 2008 (VR)      | 0                |
|              | Vital Registration Data (Live Births) 2020 (VR)                | 0                |
|              | VR Submitted to WHO/UNIGME 2020 version 2020 (VR)              | 1                |
| Tuvalu       | Census 1991 (Indirect)                                         | 1                |
|              | Census 2002 (Direct)                                           | 1                |
|              | Demographic and Health Survey 2007 (Direct)                    | 1                |
|              | Recalculated VR Submitted to WHO/UNIGME 2020 version 2020 (VR) | 1                |
|              | VR Submitted to WHO/UNIGME 2020 version 2020 (VR)              | 0                |
| Uganda       | Census 1969 (Indirect)                                         | 1                |
|              | Demographic and Health Survey 1988-1989 (Direct)               | 0                |
|              | Demographic and Health Survey 1988-1989 (Indirect)             | 0                |
|              | Demographic and Health Survey (MM adjusted) 1988-1989 (Direct) | 1                |
|              | Census 1991 (Direct)                                           | 1                |
|              | Demographic and Health Survey 1995 (Direct)                    | 0                |
|              | Demographic and Health Survey 1995 (Indirect)                  | 0                |
|              | Demographic and Health Survey (MM adjusted) 1995 (Direct)      | 1                |
|              | Demographic and Health Survey 2000-2001 (Direct)               | 0                |
|              | Demographic and Health Survey 2000-2001 (Indirect)             | 0                |
|              | Demographic and Health Survey (MM adjusted) 2000-2001 (Direct) | 1                |
|              | Census 2002 (Household Deaths)                                 | 0                |
|              | Census 2002 (Direct)                                           | 1                |
|              | Demographic and Health Survey 2006 (Household Deaths)          | 0                |
|              | Demographic and Health Survey 2006 (Direct)                    | 0                |
|              | Demographic and Health Survey 2006 (Indirect)                  | 0                |

|                             | <b>Data series</b>                                                               | <b>Inclusion</b> |
|-----------------------------|----------------------------------------------------------------------------------|------------------|
|                             | Demographic and Health Survey (MM adjusted) 2006 (Direct)                        | 1                |
|                             | Malaria Indicator Survey 2009-2010 (Direct)                                      | 0                |
|                             | Malaria Indicator Survey 2009-2010 (Indirect)                                    | 0                |
|                             | Malaria Indicator Survey (MM adjusted) 2009-2010 (Direct)                        | 1                |
|                             | Demographic and Health Survey 2011 (Direct)                                      | 0                |
|                             | Demographic and Health Survey (MM adjusted) 2011 (Direct)                        | 1                |
|                             | AIDS Indicator Survey 2011 (Household Deaths)                                    | 0                |
|                             | Census 2014 (Indirect)                                                           | 1                |
|                             | Malaria Indicator Survey 2014-2015 (Indirect)                                    | 1                |
|                             | Demographic and Health Survey 2016 (Direct)                                      | 0                |
|                             | Demographic and Health Survey (MM adjusted) 2016 (Direct)                        | 1                |
|                             | Malaria Indicator Survey 2018-2019 (Indirect)                                    | 1                |
| Ukraine                     | Census 1989 (Indirect)                                                           | 1                |
|                             | Reproductive Health Survey 1999 (Direct)                                         | 1                |
|                             | Census 2001 (Indirect)                                                           | 1                |
|                             | Multiple Indicator Cluster Survey 2005 (Indirect)                                | 0                |
|                             | Demographic and Health Survey 2007 (Direct)                                      | 1                |
|                             | Demographic and Health Survey 2007 (Indirect)                                    | 0                |
|                             | Multiple Indicator Cluster Survey 2012 (Direct)                                  | 0                |
|                             | Multiple Indicator Cluster Survey 2012 (Indirect)                                | 0                |
|                             | Vital Registration Data from Human Mortality Database (VR)                       | 0                |
|                             | Vital Registration Data from State Statistics Committee of Ukraine (VR)          | 0                |
|                             | VR Submitted to WHO/UNIGME 2020 version 2020 (VR)                                | 1                |
| United Arab Emirates        | Census 1975 (Indirect)                                                           | 1                |
|                             | Census 1980 (Indirect)                                                           | 1                |
|                             | Child Health Survey 1987 (Indirect)                                              | 1                |
|                             | Family Health Survey 1995 (Direct)                                               | 1                |
|                             | Family Health Survey 1995 (Indirect)                                             | 0                |
|                             | Vital Registration by Federal Competitiveness and Statistics Authority 2016 (VR) | 1                |
|                             | Vital Registration by Federal Competitiveness and Statistics Authority 2018 (VR) | 1                |
|                             | VR Submitted to WHO/UNIGME 2020 version 2020 (VR)                                | 0                |
| United Kingdom              | VR Submitted to WHO/UNIGME 2020 version 2020 (VR)                                | 1                |
| United Republic of Tanzania | Census 1967 (Household Deaths)                                                   | 0                |
|                             | Census 1967 (Indirect)                                                           | 1                |
|                             | National Demographic Survey 1973 (Household Deaths)                              | 0                |
|                             | Census 1978 (Indirect)                                                           | 1                |
|                             | Census 1988 (Household Deaths)                                                   | 0                |
|                             | Census 1988 (Indirect)                                                           | 1                |
|                             | Demographic and Health Survey 1991-1992 (Direct)                                 | 0                |
|                             | Demographic and Health Survey 1991-1992 (Indirect)                               | 0                |
|                             | Demographic and Health Survey (MM adjusted) 1991-1992 (Direct)                   | 1                |
|                             | Demographic and Health Survey 1996 (Direct)                                      | 0                |
|                             | Demographic and Health Survey 1996 (Indirect)                                    | 0                |
|                             | Demographic and Health Survey (MM adjusted) 1996 (Direct)                        | 1                |
|                             | Demographic and Health Survey 1999 (Direct)                                      | 0                |
|                             | Demographic and Health Survey 1999 (Indirect)                                    | 0                |
|                             | Demographic and Health Survey (MM adjusted) 1999 (Direct)                        | 1                |
|                             | Census 2002 (Household Deaths)                                                   | 0                |
|                             | Census 2002 (Indirect)                                                           | 1                |
|                             | Demographic and Health Survey 2004-2005 (Direct)                                 | 0                |
|                             | Demographic and Health Survey 2004-2005 (Indirect)                               | 0                |
|                             | Demographic and Health Survey (MM adjusted) 2004-2005 (Direct)                   | 1                |
|                             | AIDS Indicator Survey 2007-2008 (Direct)                                         | 0                |

| <b>Data series</b>                 |                                                                                                                           | <b>Inclusion</b> |
|------------------------------------|---------------------------------------------------------------------------------------------------------------------------|------------------|
|                                    | AIDS Indicator Survey 2007-2008 (Indirect)                                                                                | 0                |
|                                    | AIDS Indicator Survey (MM adjusted) 2007-2008 (Direct)                                                                    | 1                |
|                                    | AIDS Indicator Survey 2007-2008 (Household Deaths)                                                                        | 0                |
|                                    | National Panel Survey 2008-2009 (Household Deaths)                                                                        | 0                |
|                                    | Demographic and Health Survey 2010 (Direct)                                                                               | 0                |
|                                    | Demographic and Health Survey (MM adjusted) 2010 (Direct)                                                                 | 1                |
|                                    | National Panel Survey 2010-2011 (Household Deaths)                                                                        | 0                |
|                                    | Census 2012 (Indirect)                                                                                                    | 0                |
|                                    | National Panel Survey 2012-2013 (Household Deaths)                                                                        | 0                |
|                                    | Demographic and Health Survey 2015-2016 (Direct)                                                                          | 0                |
|                                    | Demographic and Health Survey (MM adjusted) 2015-2016 (Direct)                                                            | 1                |
|                                    | Malaria Indicator Survey 2017 (Indirect)                                                                                  | 1                |
| United States of America           | VR Submitted to WHO/UNIGME 2020 version 2020 (VR)                                                                         | 1                |
| Uruguay                            | TABLAS DE VIDA NACIONALES (Life Table)                                                                                    | 0                |
|                                    | Census 1975 (Indirect)                                                                                                    | 0                |
|                                    | Census 1985 (Indirect)                                                                                                    | 0                |
|                                    | Census 1996 (Indirect)                                                                                                    | 0                |
|                                    | Census 2010 (Indirect)                                                                                                    | 1                |
|                                    | UNPD Demographic Yearbook Data 2020 version 2020 (VR)                                                                     | 1                |
|                                    | VR Submitted to WHO/UNIGME 2020 version 2020 (VR)                                                                         | 1                |
| Uzbekistan                         | Demographic and Health Survey 1996 (Direct)                                                                               | 0                |
|                                    | Demographic and Health Survey 1996 (Indirect)                                                                             | 0                |
|                                    | Multiple Indicator Cluster Survey 2000 (Indirect)                                                                         | 1                |
|                                    | Demographic and Health Survey 2002 (Direct)                                                                               | 1                |
|                                    | Demographic and Health Survey 2002 (Indirect)                                                                             | 0                |
|                                    | Multiple Indicator Cluster Survey 2006 (Indirect)                                                                         | 1                |
|                                    | Vital registration from National Statistical Office 2017 (VR)                                                             | 0                |
|                                    | VR Submitted to WHO/UNIGME 2020 version 2020 (VR)                                                                         | 1                |
| Vanuatu                            | Census 1967 (Indirect)                                                                                                    | 1                |
|                                    | Census 1989 (Indirect)                                                                                                    | 1                |
|                                    | Census 1999 (Indirect)                                                                                                    | 1                |
|                                    | Multiple Indicator Cluster Survey 2007-2008 (Indirect)                                                                    | 0                |
|                                    | Census 2009 (Household Deaths)                                                                                            | 0                |
|                                    | Census 2009 (Indirect)                                                                                                    | 1                |
|                                    | Demographic and Health Survey 2013 (Direct)                                                                               | 1                |
| Venezuela (Bolivarian Republic of) | TABLAS DE VIDA NACIONALES (Life Table)                                                                                    | 1                |
|                                    | World Fertility Survey 1977 (Direct)                                                                                      | 1                |
|                                    | World Fertility Survey 1977 (Indirect)                                                                                    | 0                |
|                                    | Census 1981 (Indirect)                                                                                                    | 1                |
|                                    | Census 1990 (Indirect)                                                                                                    | 1                |
|                                    | National Population and Family Survey 1998 (Direct)                                                                       | 1                |
|                                    | Census 2001 (Indirect)                                                                                                    | 1                |
|                                    | Census 2011 (Indirect)                                                                                                    | 1                |
|                                    | Vital Registration Data from Ministerio del Poder Popular para la Planificacion y Desarrollo (May 2009) 2009 (VR)         | 0                |
|                                    | Vital Registration data from Instituto Nacional de Estadistica 2014 (VR)                                                  | 0                |
|                                    | Vital Registration Data from Ministerio del Poder Popular para la Salud 2017 (VR)                                         | 0                |
|                                    | Provisional adjusted data from Ministerio del Poder Popular para la Salud and Instituto Nacional de Estadistica 2019 (VR) | 0                |
|                                    | VR submitted to UN IGME in 2018 2019 (VR)                                                                                 | 0                |
|                                    | UNPD Demographic Yearbook Data 2020 version 2020 (VR)                                                                     | 0                |
|                                    | VR Submitted to WHO/UNIGME 2020 version 2020 (VR)                                                                         | 1                |

|                                                           | <b>Data series</b>                                                   | <b>Inclusion</b> |
|-----------------------------------------------------------|----------------------------------------------------------------------|------------------|
| Viet Nam                                                  | Demographic and Health Survey 1988 (Direct)                          | 1                |
|                                                           | Demographic and Health Survey 1988 (Indirect)                        | 0                |
|                                                           | Census 1989 (Indirect)                                               | 1                |
|                                                           | Intercensal Demographic Survey 1994 (Direct)                         | 1                |
|                                                           | Intercensal Demographic Survey 1994 (Indirect)                       | 0                |
|                                                           | Demographic and Health Survey 1997 (Direct)                          | 1                |
|                                                           | Demographic and Health Survey 1997 (Indirect)                        | 0                |
|                                                           | Vietnam Longitudinal Survey (VLSS) 1998 (Direct)                     | 1                |
|                                                           | Census 1999 (Household Deaths)                                       | 0                |
|                                                           | Census 1999 (Indirect)                                               | 0                |
|                                                           | Multiple Indicator Cluster Survey 2000 (Indirect)                    | 1                |
|                                                           | Demographic and Health Survey 2002 (Direct)                          | 1                |
|                                                           | Demographic and Health Survey 2002 (Indirect)                        | 0                |
|                                                           | Multiple Indicator Cluster Survey 2006 (Indirect)                    | 0                |
|                                                           | Population Change and Family Planning Survey 2006 (Indirect)         | 0                |
|                                                           | Population Change and Family Planning Survey 2007 (Household Deaths) | 0                |
|                                                           | Population Change and Family Planning Survey 2007 (Indirect)         | 0                |
|                                                           | Population Change and Family Planning Survey 2008 (Indirect)         | 0                |
|                                                           | Census 2009 (Indirect)                                               | 0                |
|                                                           | Population Change and Family Planning Survey 2010 (Indirect)         | 0                |
|                                                           | Multiple Indicator Cluster Survey 2010-2011 (Indirect)               | 0                |
|                                                           | Population Change and Family Planning Survey 2011 (Household Deaths) | 1                |
|                                                           | Population Change and Family Planning Survey 2011 (Indirect)         | 0                |
|                                                           | Population Change and Family Planning Survey 2012 (Household Deaths) | 1                |
|                                                           | Population Change and Family Planning Survey 2012 (Indirect)         | 0                |
|                                                           | Population Change and Family Planning Survey 2013 (Household Deaths) | 1                |
|                                                           | Population Change and Family Planning Survey 2013 (Indirect)         | 0                |
|                                                           | Multiple Indicator Cluster Survey 2013-2014 (Direct)                 | 1                |
|                                                           | Intercensal Population and Housing Survey 2014 (Household Deaths)    | 1                |
|                                                           | Population Change and Family Planning Survey 2015 (Household Deaths) | 1                |
|                                                           | Population Change and Family Planning Survey 2015 (Indirect)         | 0                |
|                                                           | Population Change and Family Planning Survey 2016 (Household Deaths) | 1                |
|                                                           | Population Change and Family Planning Survey 2016 (Indirect)         | 0                |
| Yemen                                                     | WFS-Household survey 1979 (Indirect)                                 | 0                |
|                                                           | WFS-Individual survey 1979 (Indirect)                                | 0                |
|                                                           | World Fertility Survey 1979 (Direct)                                 | 1                |
|                                                           | Demographic and Health Survey 1991-1992 (Direct)                     | 1                |
|                                                           | Demographic and Health Survey 1991-1992 (Indirect)                   | 0                |
|                                                           | Census 1994 (Indirect)                                               | 1                |
|                                                           | Demographic and Health Survey 1997 (Direct)                          | 1                |
|                                                           | Demographic and Health Survey 1997 (Indirect)                        | 0                |
|                                                           | PAPFAM Family Health Survey 2003 (Direct)                            | 1                |
|                                                           | Census 2004 (Household Deaths)                                       | 1                |
|                                                           | Census 2004 (Indirect)                                               | 1                |
|                                                           | Multiple Indicator Cluster Survey 2006 (Direct)                      | 1                |
|                                                           | Multiple Indicator Cluster Survey 2006 (Indirect)                    | 0                |
| Zambia                                                    | Demographic and Health Survey 2013 (Direct)                          | 1                |
|                                                           | Census 1969 (Indirect)                                               | 1                |
|                                                           | Sample Census of Population 1974 (Indirect)                          | 1                |
|                                                           | Census 1980 (Indirect)                                               | 1                |
|                                                           | Census 1990 (Indirect)                                               | 1                |
|                                                           | Demographic and Health Survey 1992 (Direct)                          | 0                |
|                                                           | Demographic and Health Survey 1992 (Indirect)                        | 0                |
| Demographic and Health Survey (MM adjusted) 1992 (Direct) | 1                                                                    |                  |

|          | <b>Data series</b>                                             | <b>Inclusion</b> |
|----------|----------------------------------------------------------------|------------------|
|          | Demographic and Health Survey 1996-1997 (Direct)               | 0                |
|          | Demographic and Health Survey 1996-1997 (Indirect)             | 0                |
|          | Demographic and Health Survey (MM adjusted) 1996-1997 (Direct) | 1                |
|          | Census 2000 (Indirect)                                         | 1                |
|          | Demographic and Health Survey 2001-2002 (Direct)               | 0                |
|          | Demographic and Health Survey 2001-2002 (Indirect)             | 0                |
|          | Demographic and Health Survey (MM adjusted) 2001-2002 (Direct) | 1                |
|          | Demographic and Health Survey 2007 (Household Deaths)          | 0                |
|          | Demographic and Health Survey 2007 (Direct)                    | 0                |
|          | Demographic and Health Survey (MM adjusted) 2007 (Direct)      | 1                |
|          | Demographic Sample Survey 2007 (Indirect)                      | 1                |
|          | Global Fund Evaluation Survey 2008 (Household Deaths)          | 0                |
|          | Census 2010 (Indirect)                                         | 1                |
|          | Census 2010 (Household Deaths)                                 | 0                |
|          | Demographic and Health Survey 2013-2014 (Direct)               | 0                |
|          | Demographic and Health Survey (MM adjusted) 2013-2014 (Direct) | 1                |
|          | Demographic and Health Survey 2018 (Direct)                    | 0                |
|          | Demographic and Health Survey (MM adjusted) 2018 (Direct)      | 1                |
| Zimbabwe | Census 1969 (Indirect)                                         | 1                |
|          | Census 1982 (Indirect)                                         | 1                |
|          | Reproductive Health Survey 1984 (Indirect)                     | 1                |
|          | Inter-censal Demographic Survey 1987 (Indirect)                | 1                |
|          | Demographic and Health Survey 1988-1989 (Direct)               | 0                |
|          | Demographic and Health Survey 1988-1989 (Indirect)             | 0                |
|          | Demographic and Health Survey (MM adjusted) 1988-1989 (Direct) | 1                |
|          | Census 1992 (Household Deaths)                                 | 0                |
|          | Census 1992 (Indirect)                                         | 1                |
|          | Demographic and Health Survey 1994 (Direct)                    | 0                |
|          | Demographic and Health Survey 1994 (Indirect)                  | 0                |
|          | Demographic and Health Survey (MM adjusted) 1994 (Direct)      | 1                |
|          | Inter-censal Demographic Survey 1997 (Household Deaths)        | 0                |
|          | Inter-censal Demographic Survey 1997 (Indirect)                | 1                |
|          | Demographic and Health Survey 1999 (Direct)                    | 0                |
|          | Demographic and Health Survey 1999 (Indirect)                  | 0                |
|          | Demographic and Health Survey (MM adjusted) 1999 (Direct)      | 1                |
|          | Census 2002 (Household Deaths)                                 | 0                |
|          | Census 2002 (Indirect)                                         | 1                |
|          | Demographic and Health Survey 2005-2006 (Household Deaths)     | 0                |
|          | Demographic and Health Survey 2005-2006 (Direct)               | 0                |
|          | Demographic and Health Survey 2005-2006 (Indirect)             | 0                |
|          | Demographic and Health Survey (MM adjusted) 2005-2006 (Direct) | 0                |
|          | Multiple Indicator Cluster Survey 2009 (Direct)                | 0                |
|          | Multiple Indicator Cluster Survey (MM adjusted) 2009 (Direct)  | 1                |
|          | Demographic and Health Survey 2010-2011 (Direct)               | 0                |
|          | Demographic and Health Survey (MM adjusted) 2010-2011 (Direct) | 1                |
|          | Census 2012 (Household Deaths)                                 | 0                |
|          | Multiple Indicator Cluster Survey 2014 (Direct)                | 0                |
|          | Multiple Indicator Cluster Survey (MM adjusted) 2014 (Direct)  | 1                |
|          | Demographic and Health Survey 2015 (Direct)                    | 0                |
|          | Demographic and Health Survey (MM adjusted) 2015 (Direct)      | 1                |
|          | Multiple Indicator Cluster Survey 2019 (Direct)                | 0                |
|          | Multiple Indicator Cluster Survey (MM adjusted) 2019 (Direct)  | 1                |

## 4. Supplementary figures

### 4.1. Figure A.1 Trends in U5MR, NMR, and number of under-5 deaths, 1990-2019, with 90% uncertainty intervals, by region

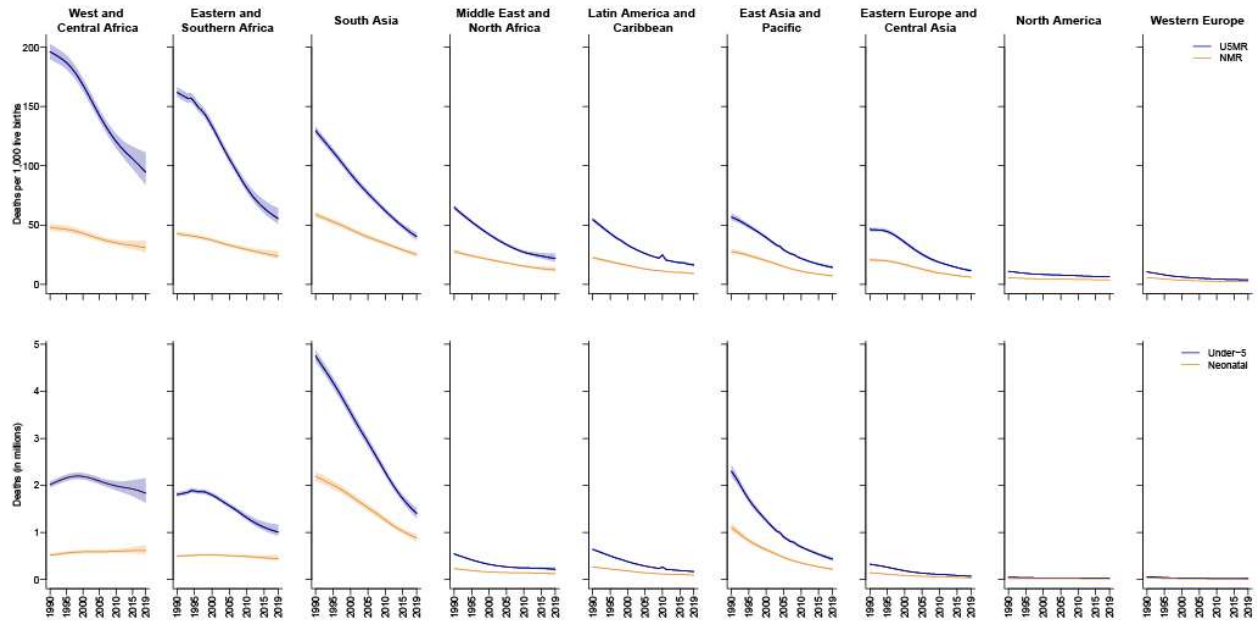

4.2. Figure A.2 Annual rate of reduction 2010-2019 and required annual rate of reduction to achieve SDG target

Under-five mortality rate (SDG 3.2.1)

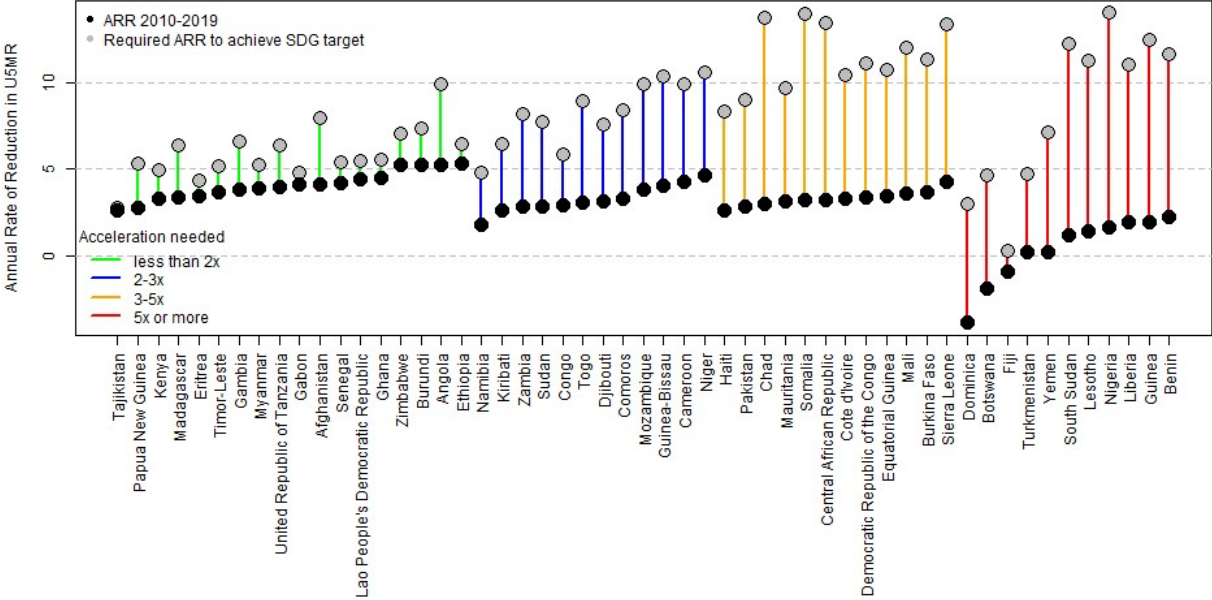

Neonatal mortality rate (SDG 3.2.2)

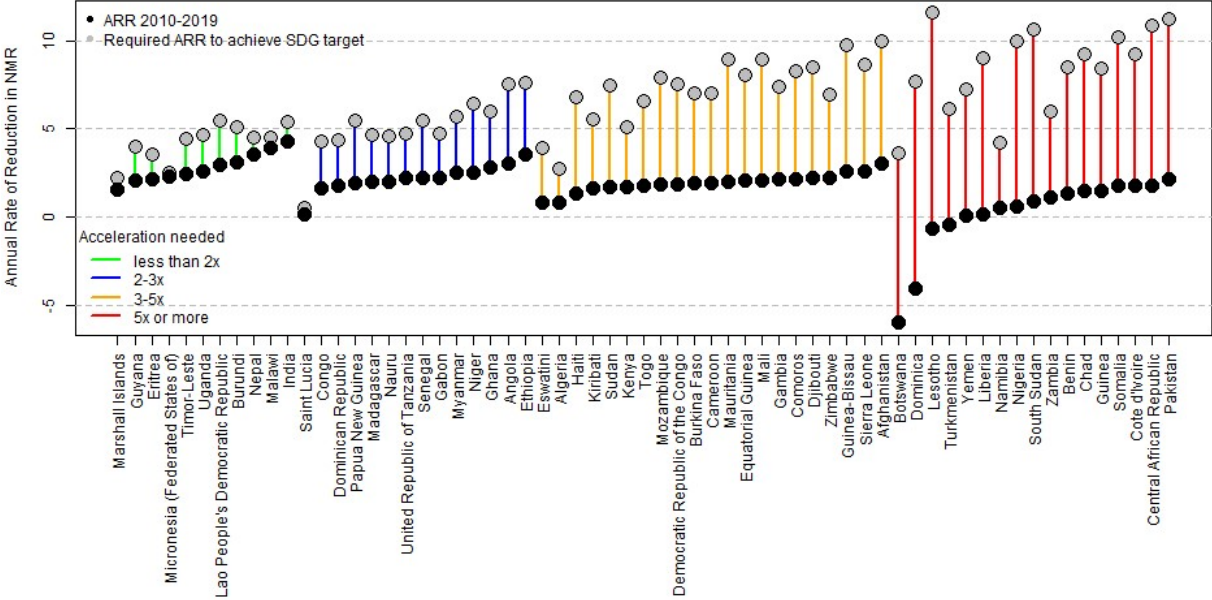

4.3. Figure A.3 Projected global under-5 mortality rate and the number of under-5 deaths 2020-2030

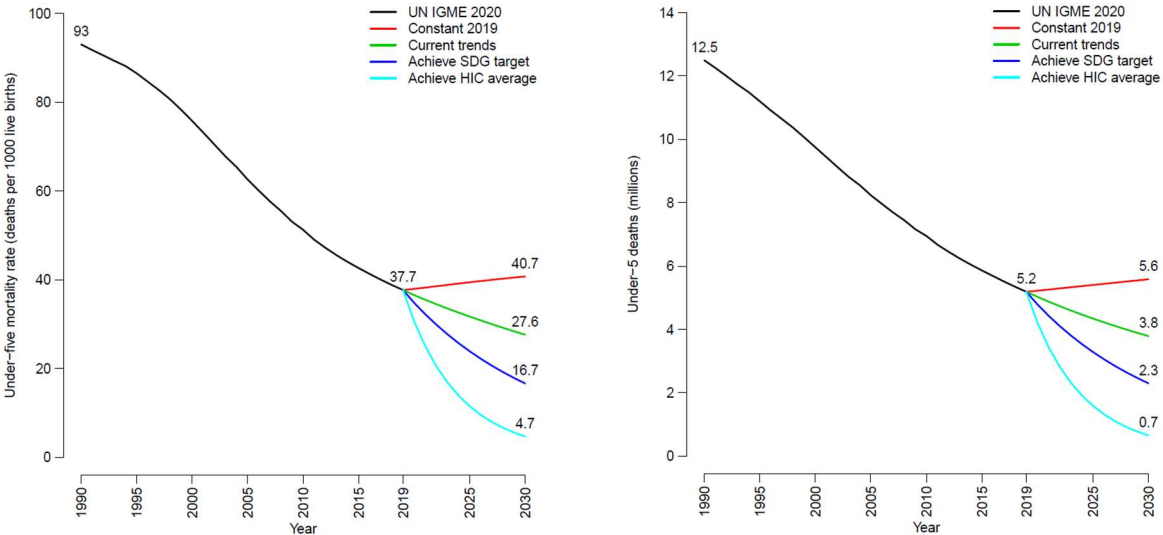



4.4. Figure A.4 Under-five mortality estimates with underlying data, by country

# Afghanistan

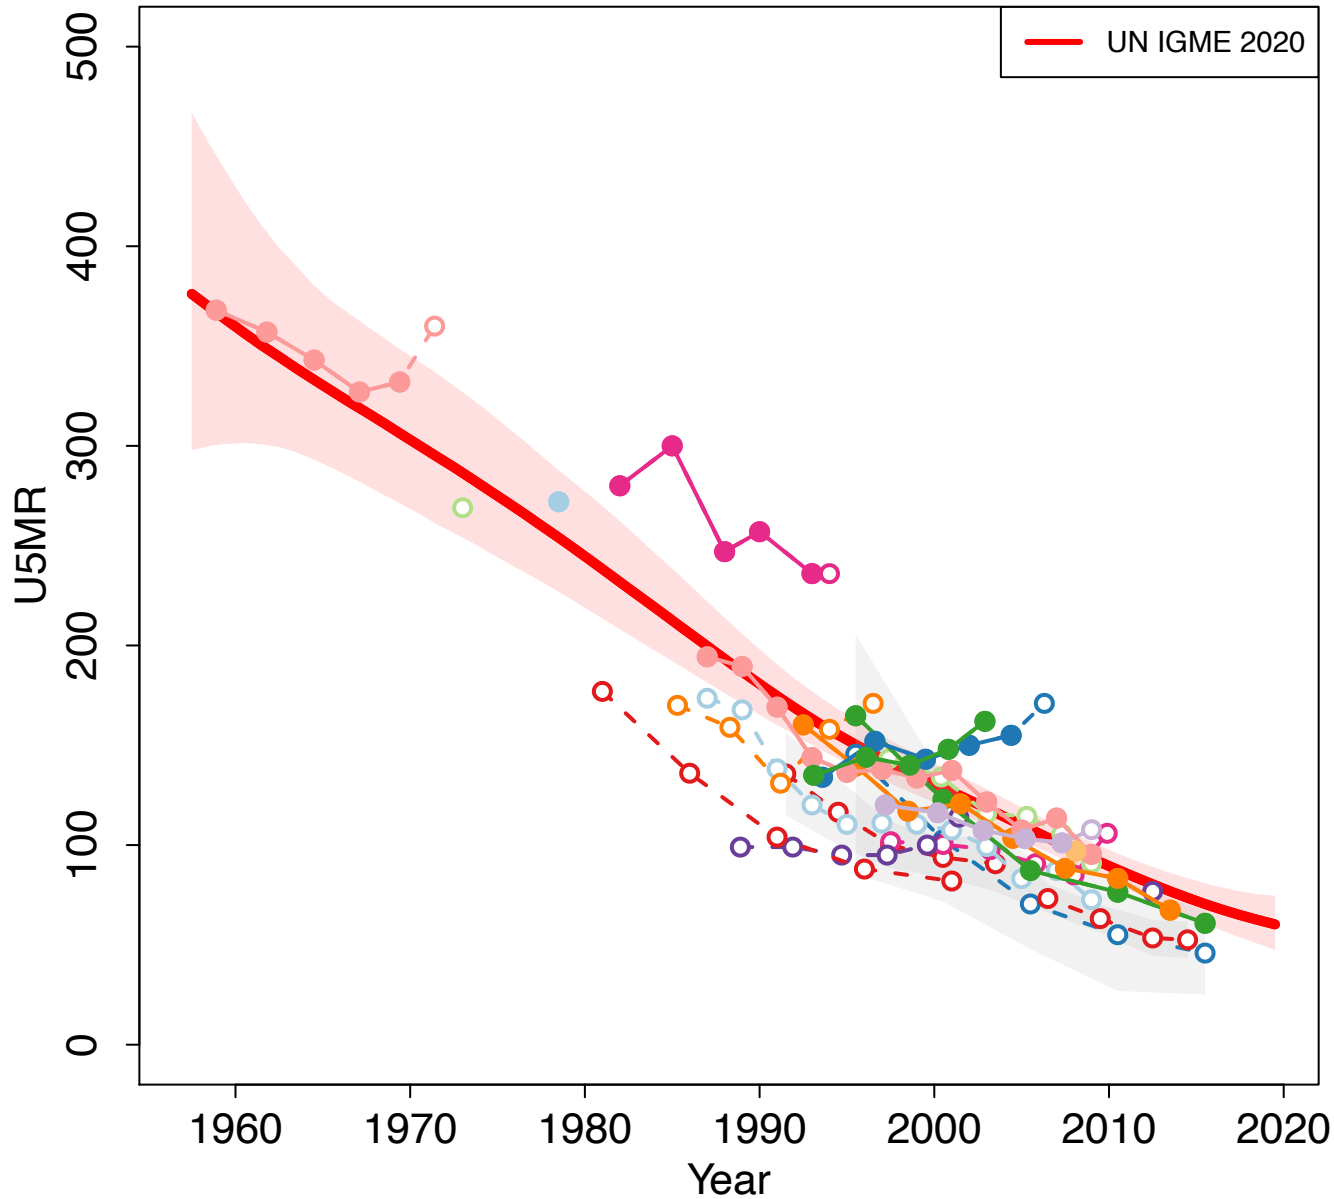

# Zoomed in

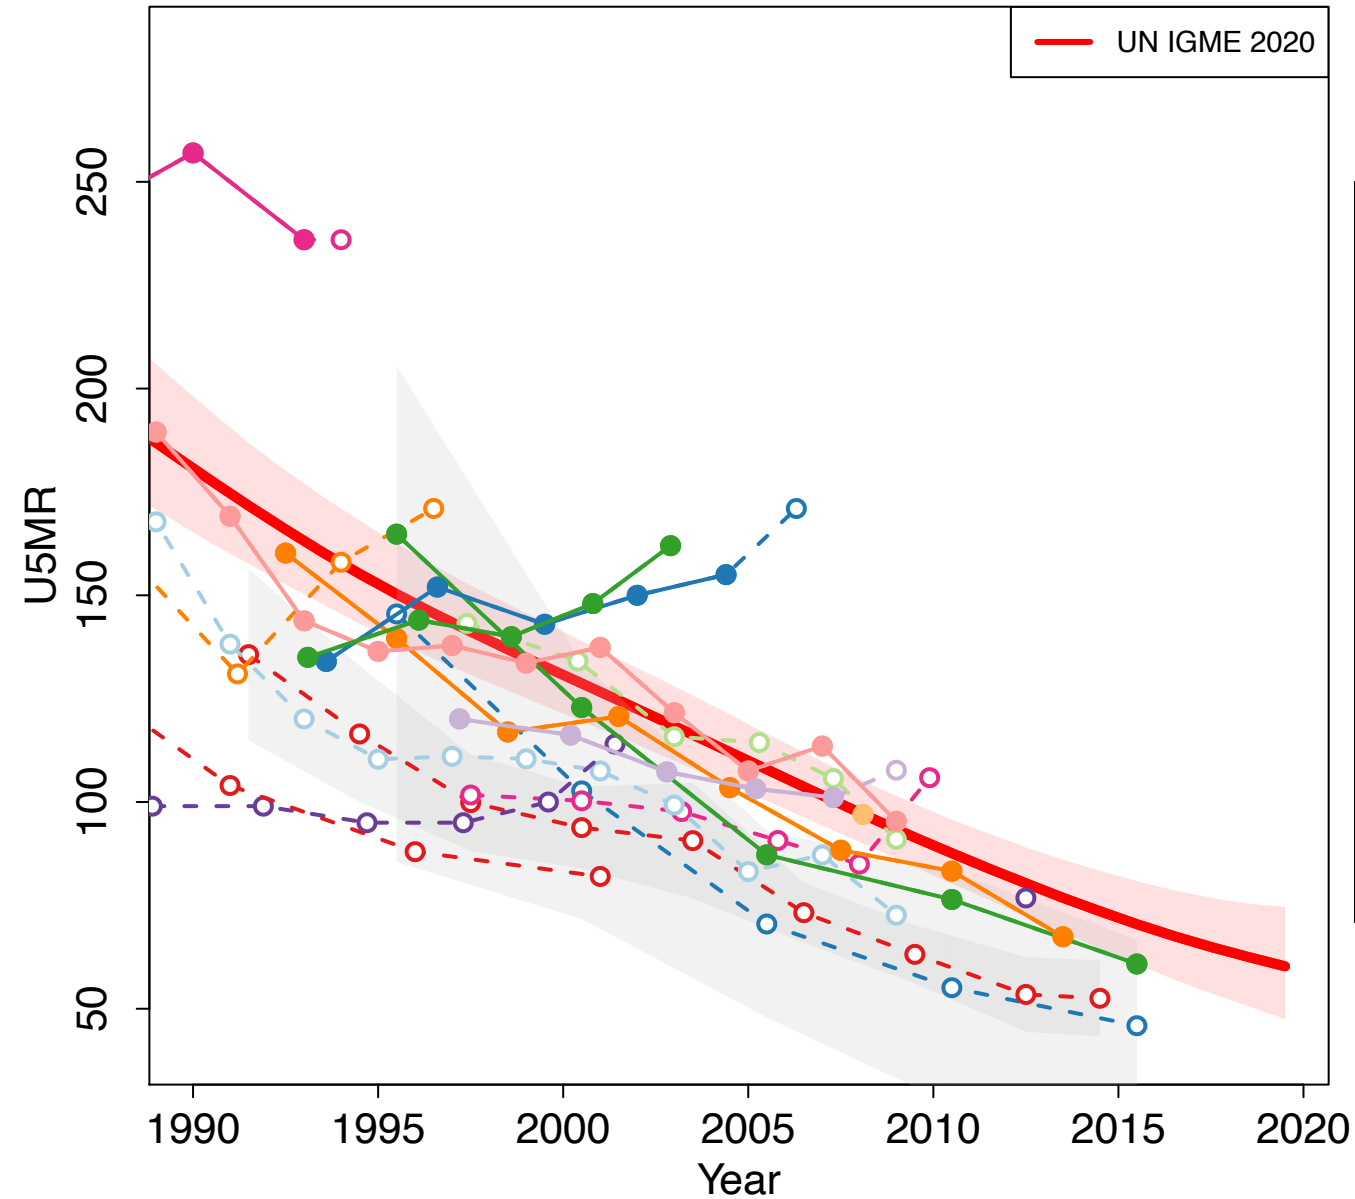

# Albania

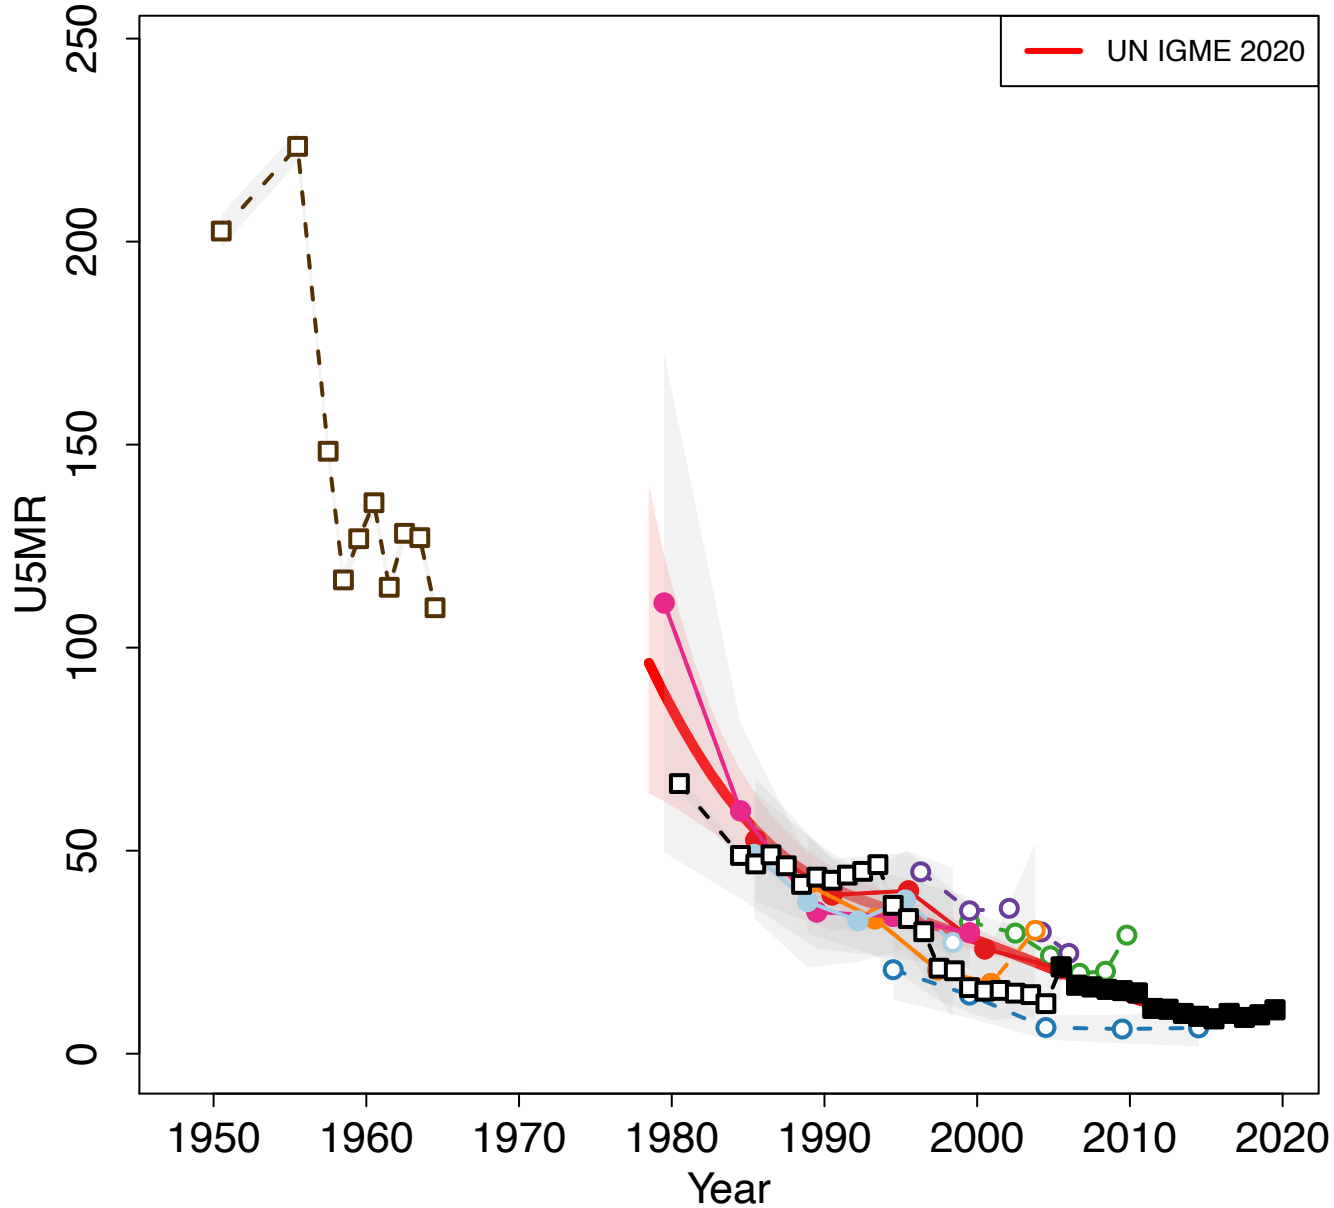

# Zoomed in

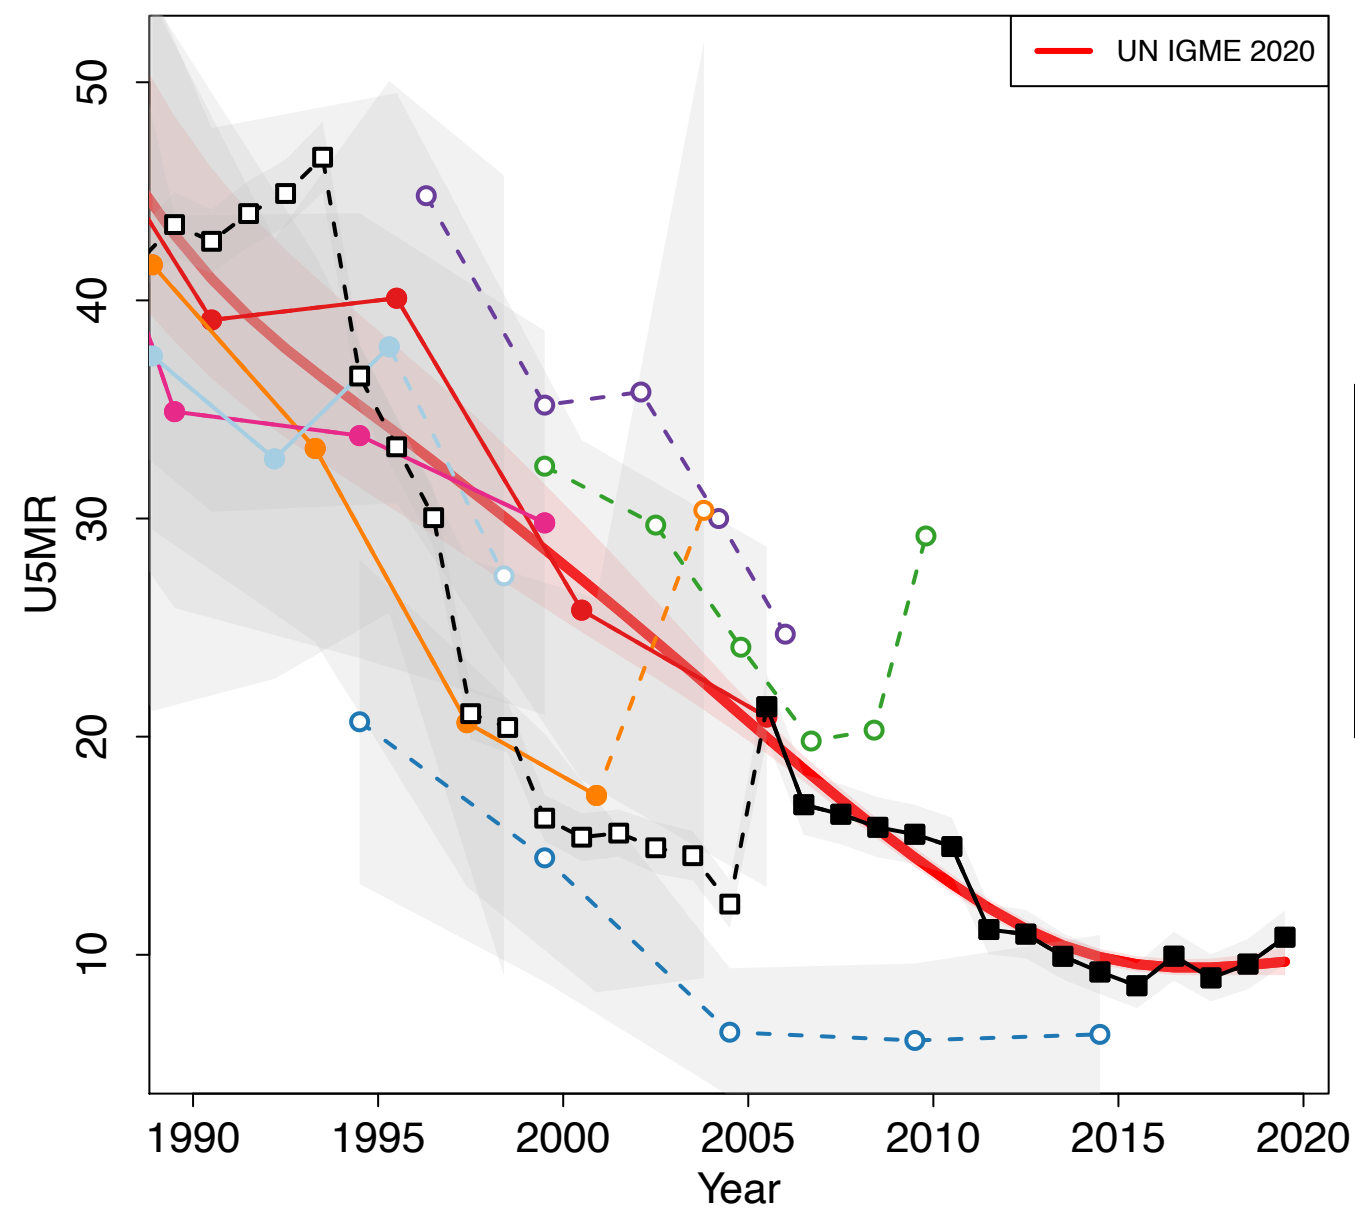

- Multiple Indicator Cluster Survey 2000 (MICS Indirect)
- Reproductive Health Survey 2002 (Others Direct)
- Multiple Indicator Cluster Survey 2005 (MICS Indirect)
- Demographic and Health Survey 2008–2009 (DHS Direct)
- Demographic and Health Survey 2008–2009 (DHS Indirect)
- Census 2011 (Census Indirect)
- Demographic and Health Survey 2017–2018 (DHS Direct)
- VR UNPD Demographic Yearbook Data 2020 version
- VR WHO

### Algeria

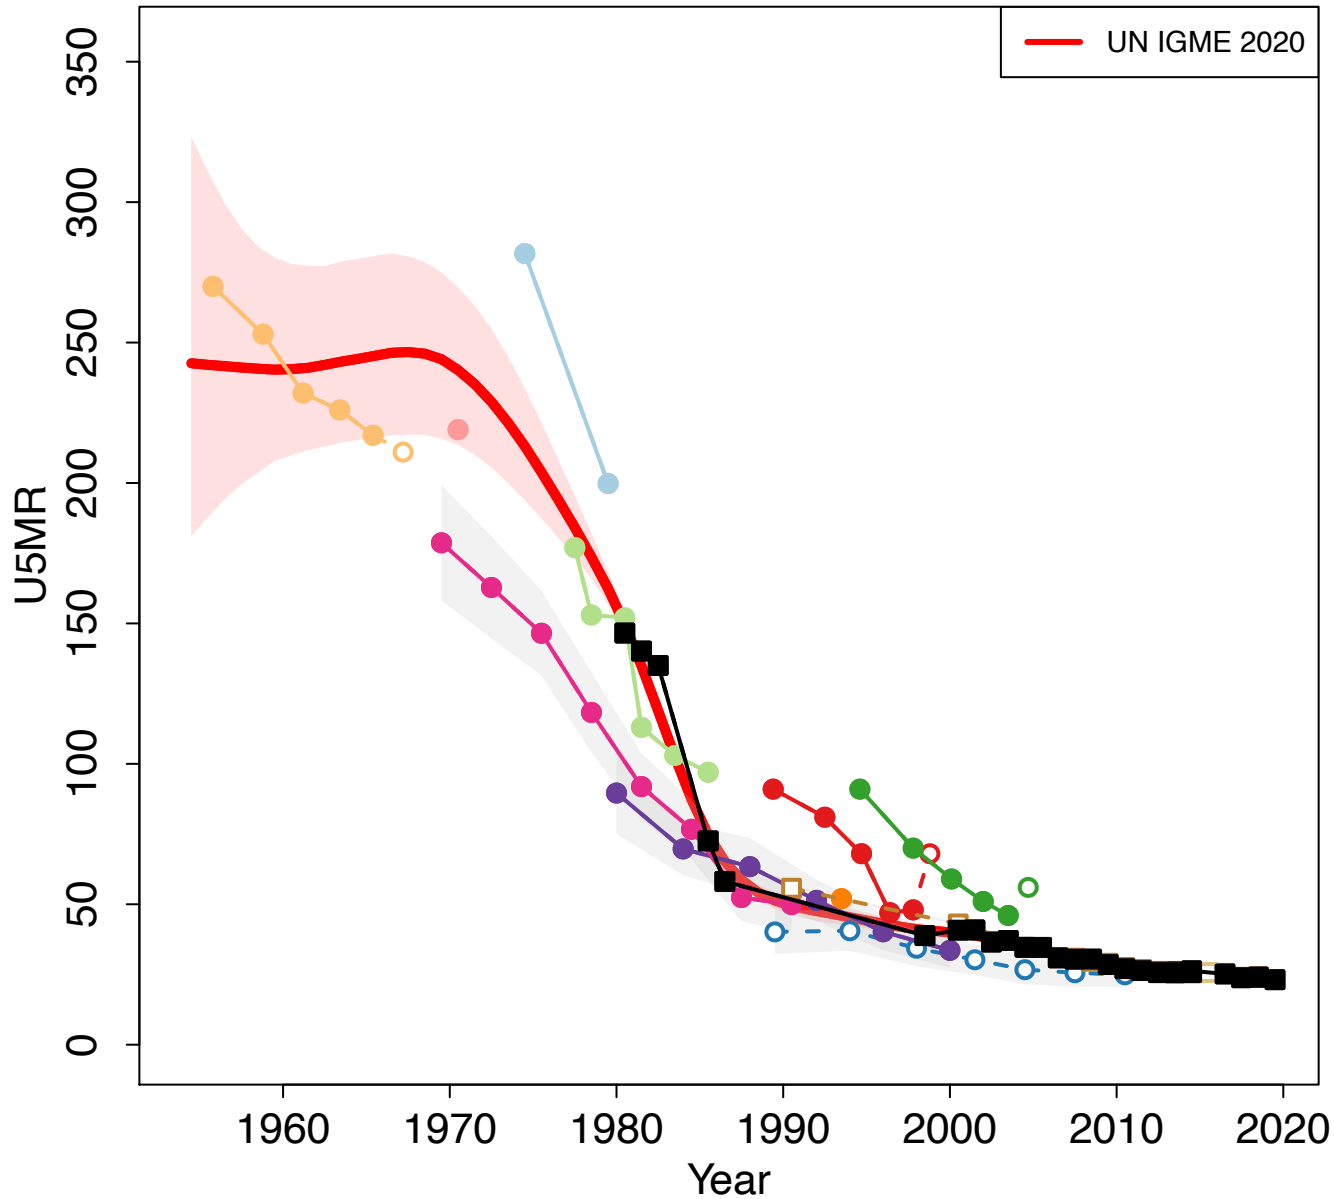

### Zoomed in

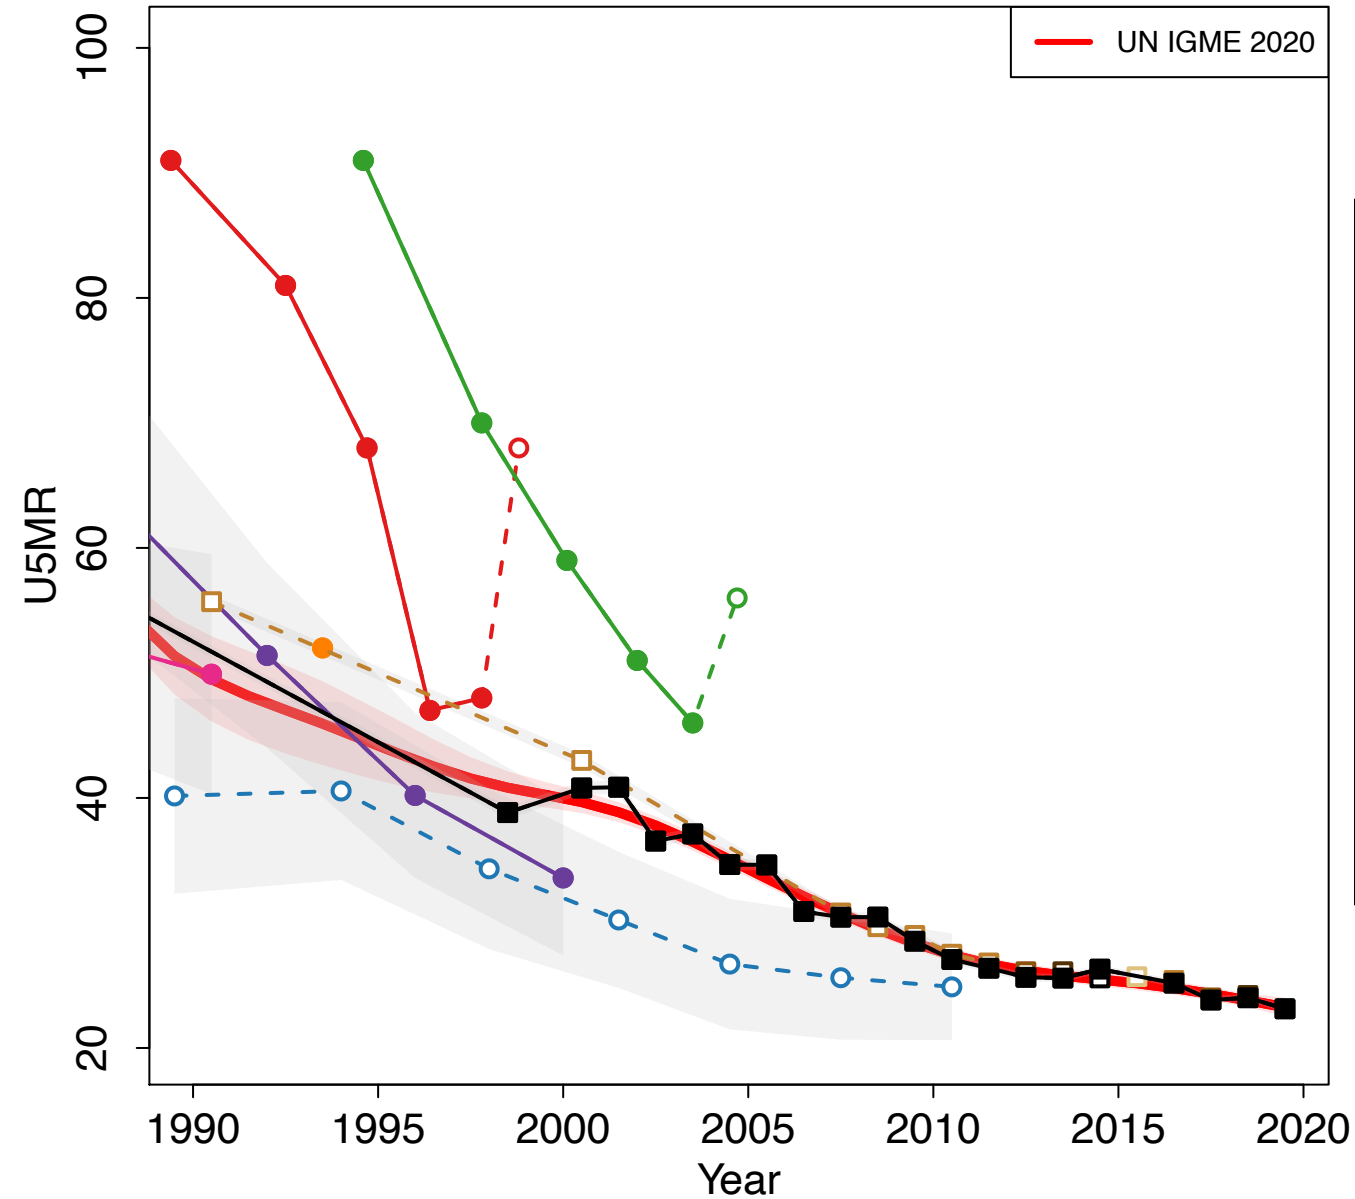

- Algeria Fertility Survey 1970 (Others Indirect)
- Demographic Survey 1970 (Others Direct)
- Life Tables 1985 (Others Life Table)
- National Fertility Survey 1986 (Others Direct)
- PAPCHILD Maternal and Child Health Survey 1992 (Others Direct)
- Multiple Indicator Cluster Survey 1995 (Others Direct)
- Multiple Indicator Cluster Survey 2000 (Others Indirect)
- PAPFAM Family Health Survey 2002 (Others Direct)
- Multiple Indicator Cluster Survey 2006 (Others Indirect)
- Multiple Indicator Cluster Survey 2012–2013 (MICS Direct)
- VR VR from Demographie Algerienne 2012
- VR VR from Demographie Algerienne 2013
- VR VR from Demographie Algerienne 2014
- VR VR from Demographie Algerienne 2014
- VR VR from Demographie Algerienne 2015
- VR VR from Demographie Algerienne 2016
- VR VR from Demographie Algerienne 2017
- VR VR from Demographie Algerienne 2018
- VR WHO

### Andorra

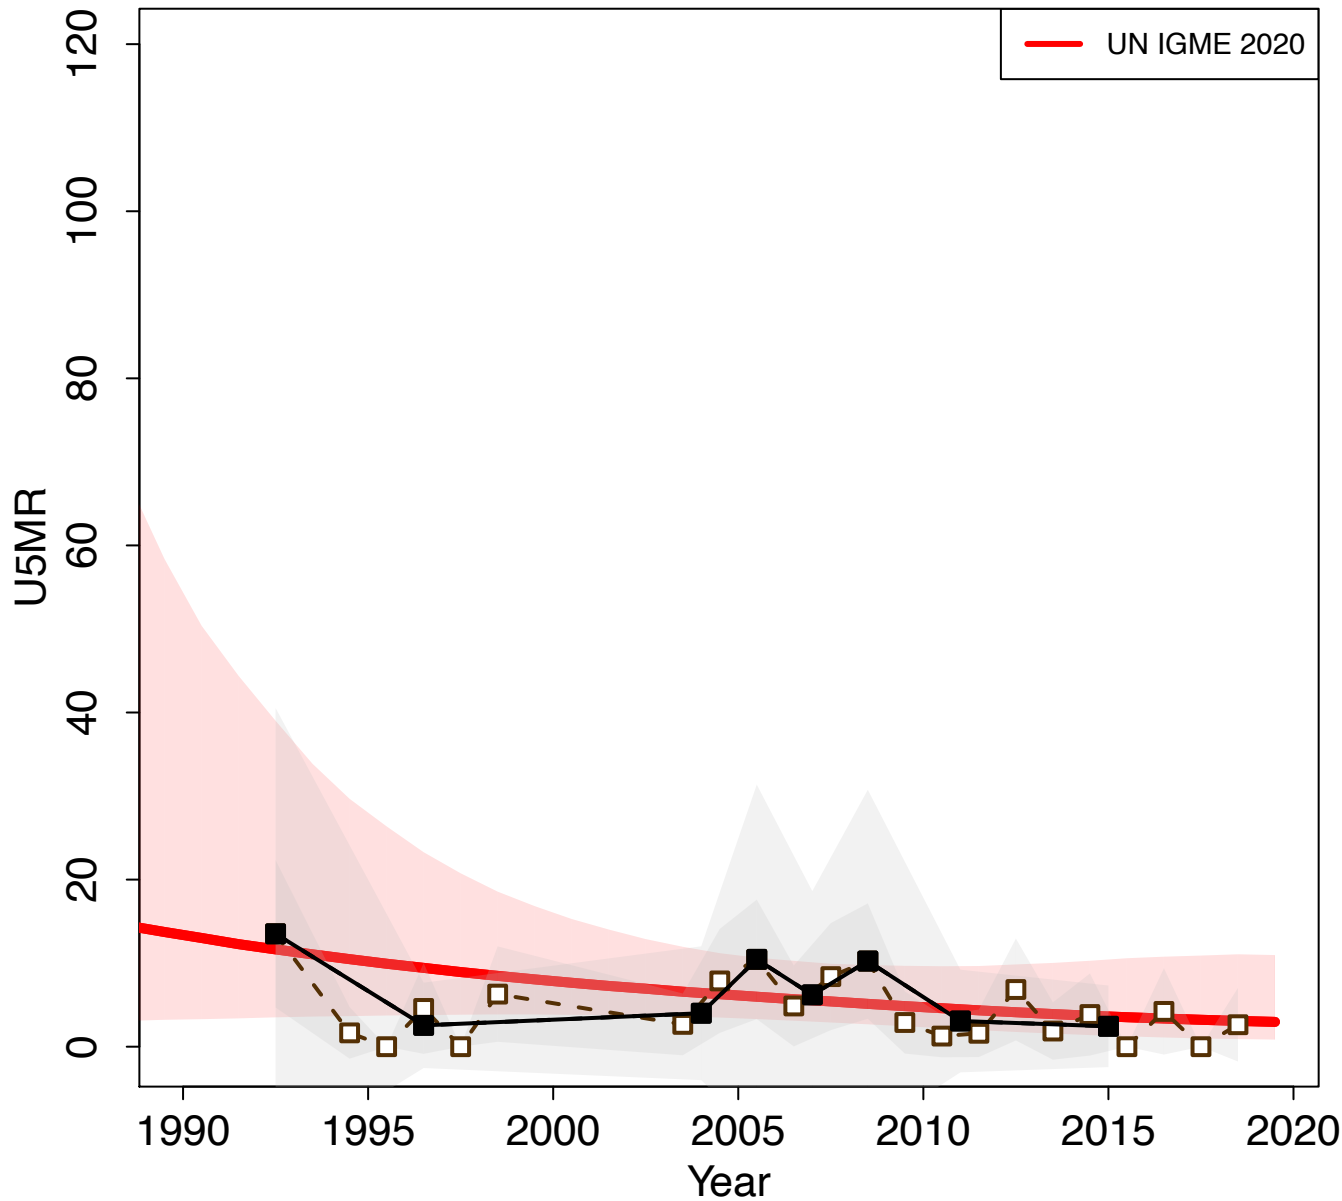

### Zoomed in

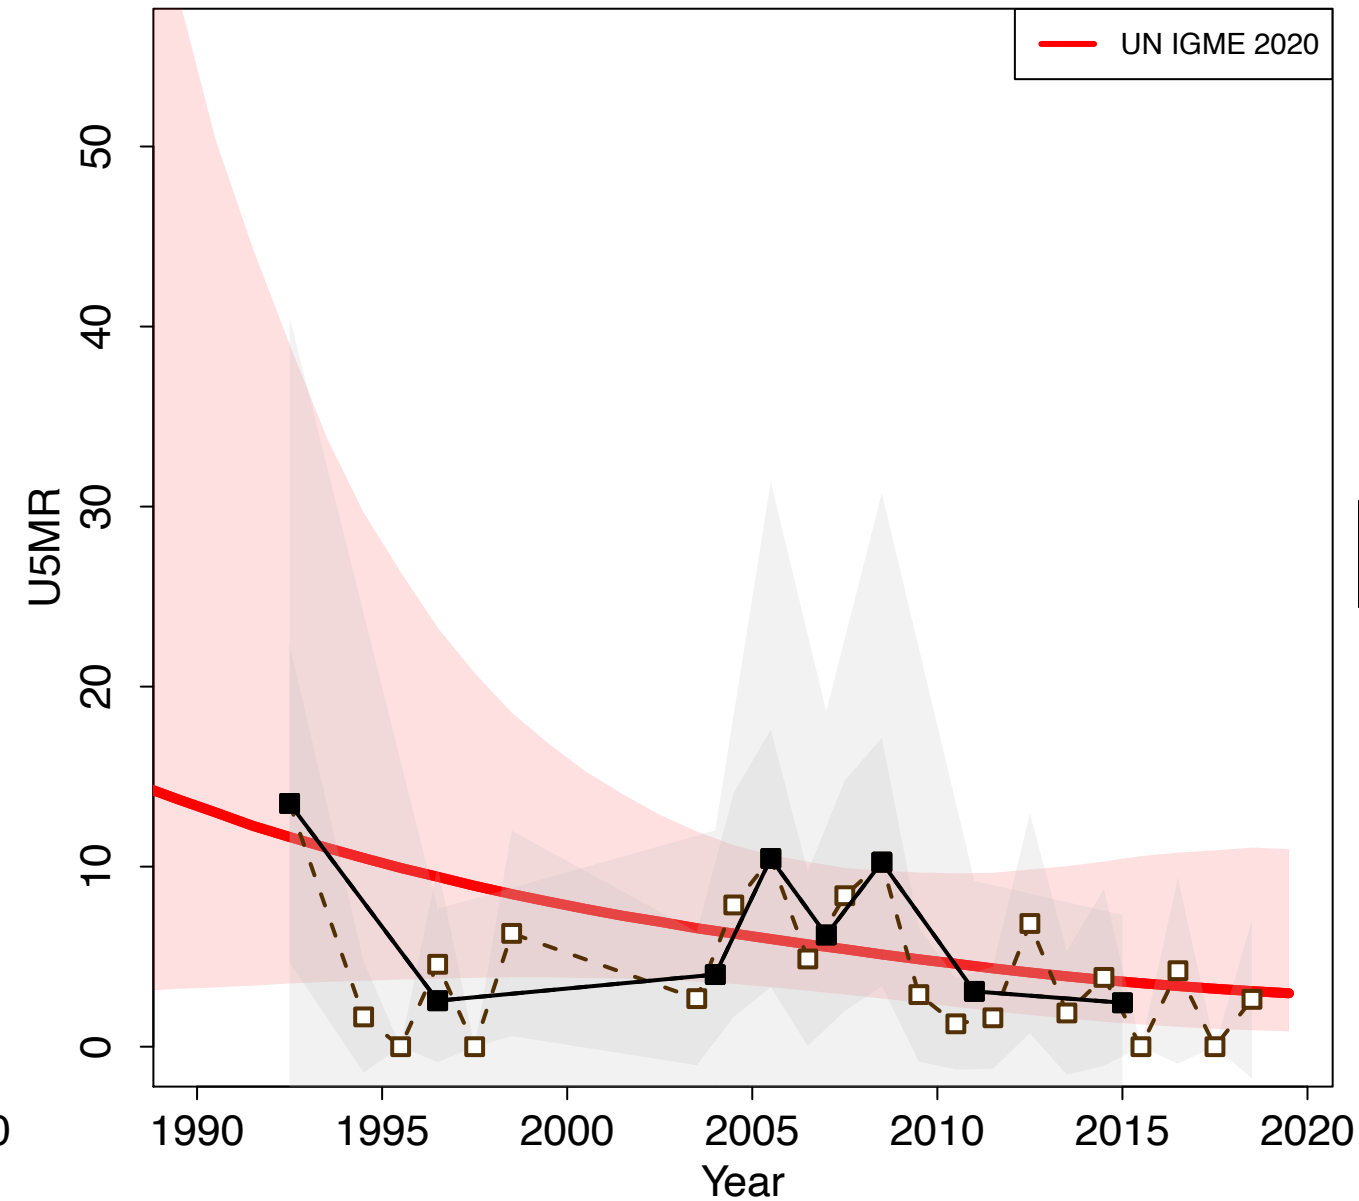

# Angola

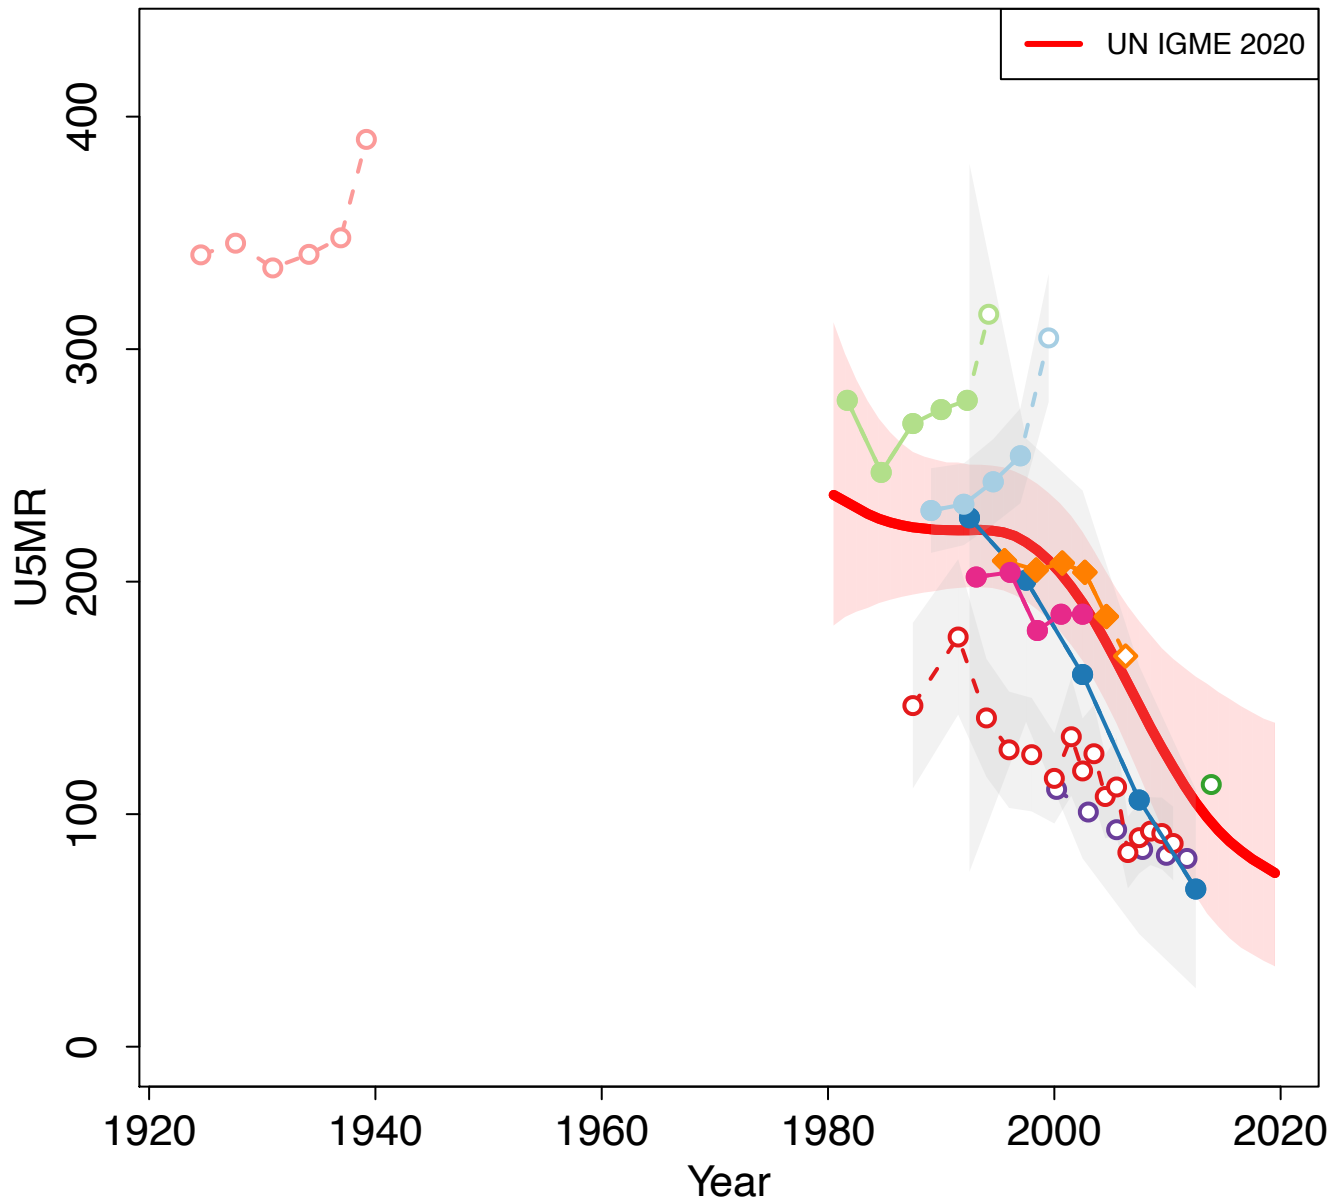

# Zoomed in

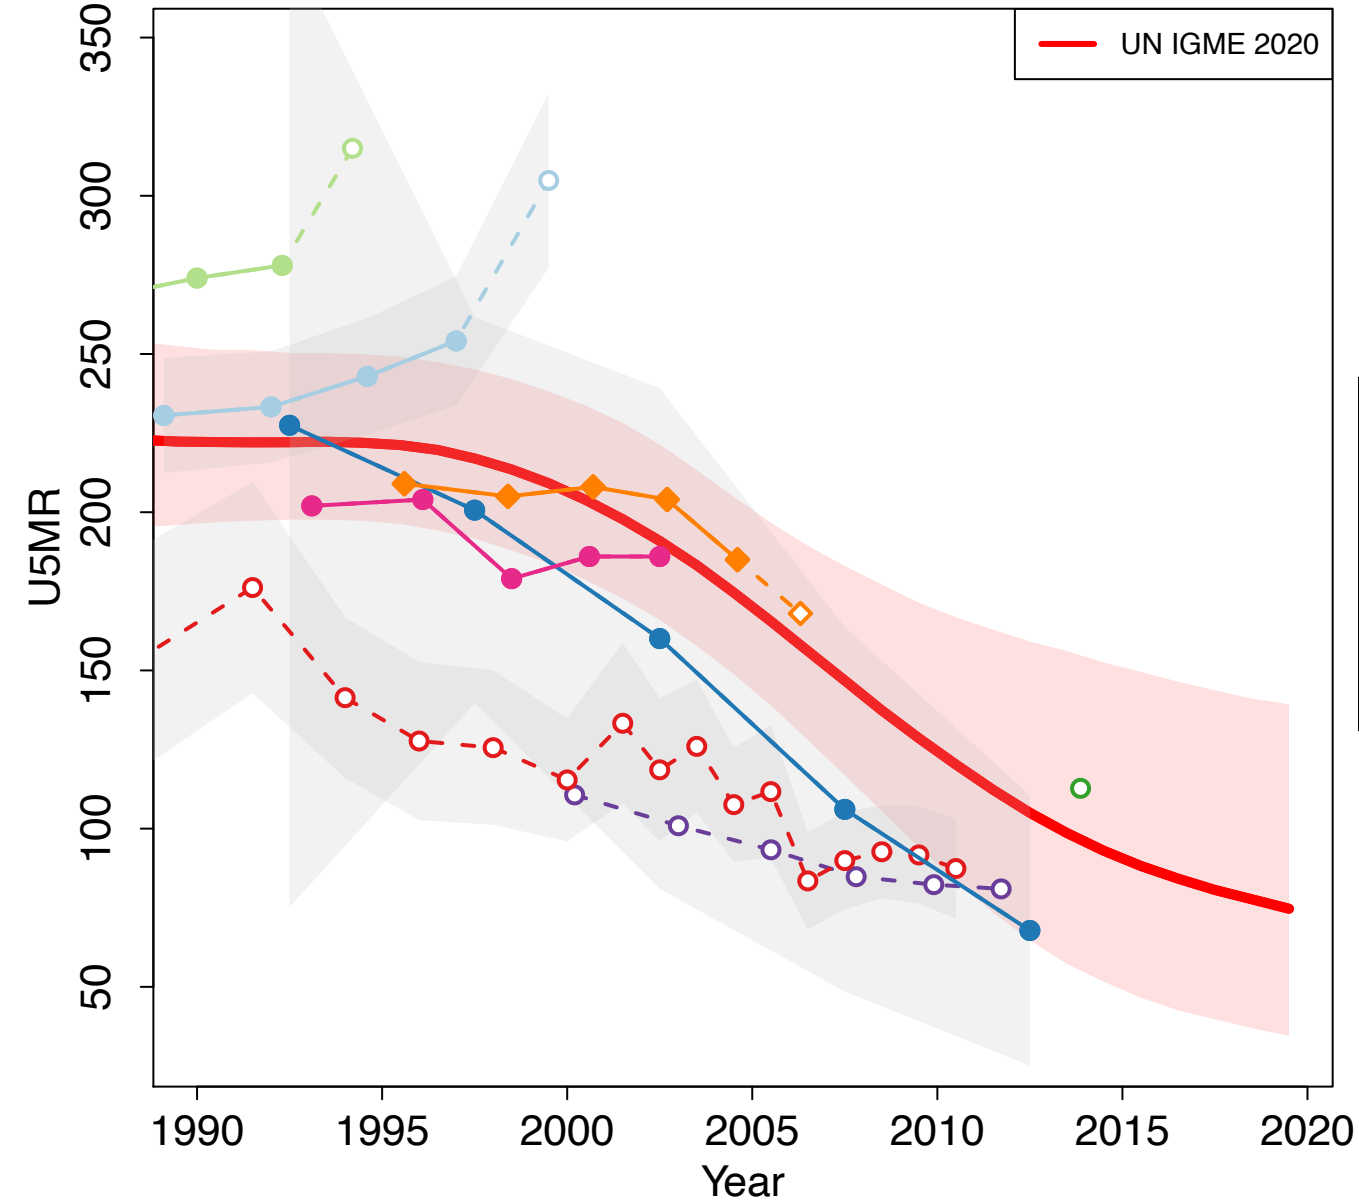

- Census 1940 (Census Indirect)
- Multiple Indicator Cluster Survey 1996 (Others Indirect)
- Multiple Indicator Cluster Survey 2001 (MICS Indirect)
- Malaria Indicator Survey 2006-2007 (Other DHS Indirect)
- Household Incomes and Expenditures Survey IBEP 2008-2009 (Others Indirect)
- Malaria Indicator Survey 2011 (Other DHS Direct)
- Census 2014 (Census Indirect)
- Census 2014 (Others Household Deaths)
- Demographic and Health Survey 2015-2016 (DHS Direct)

# Antigua and Barbuda

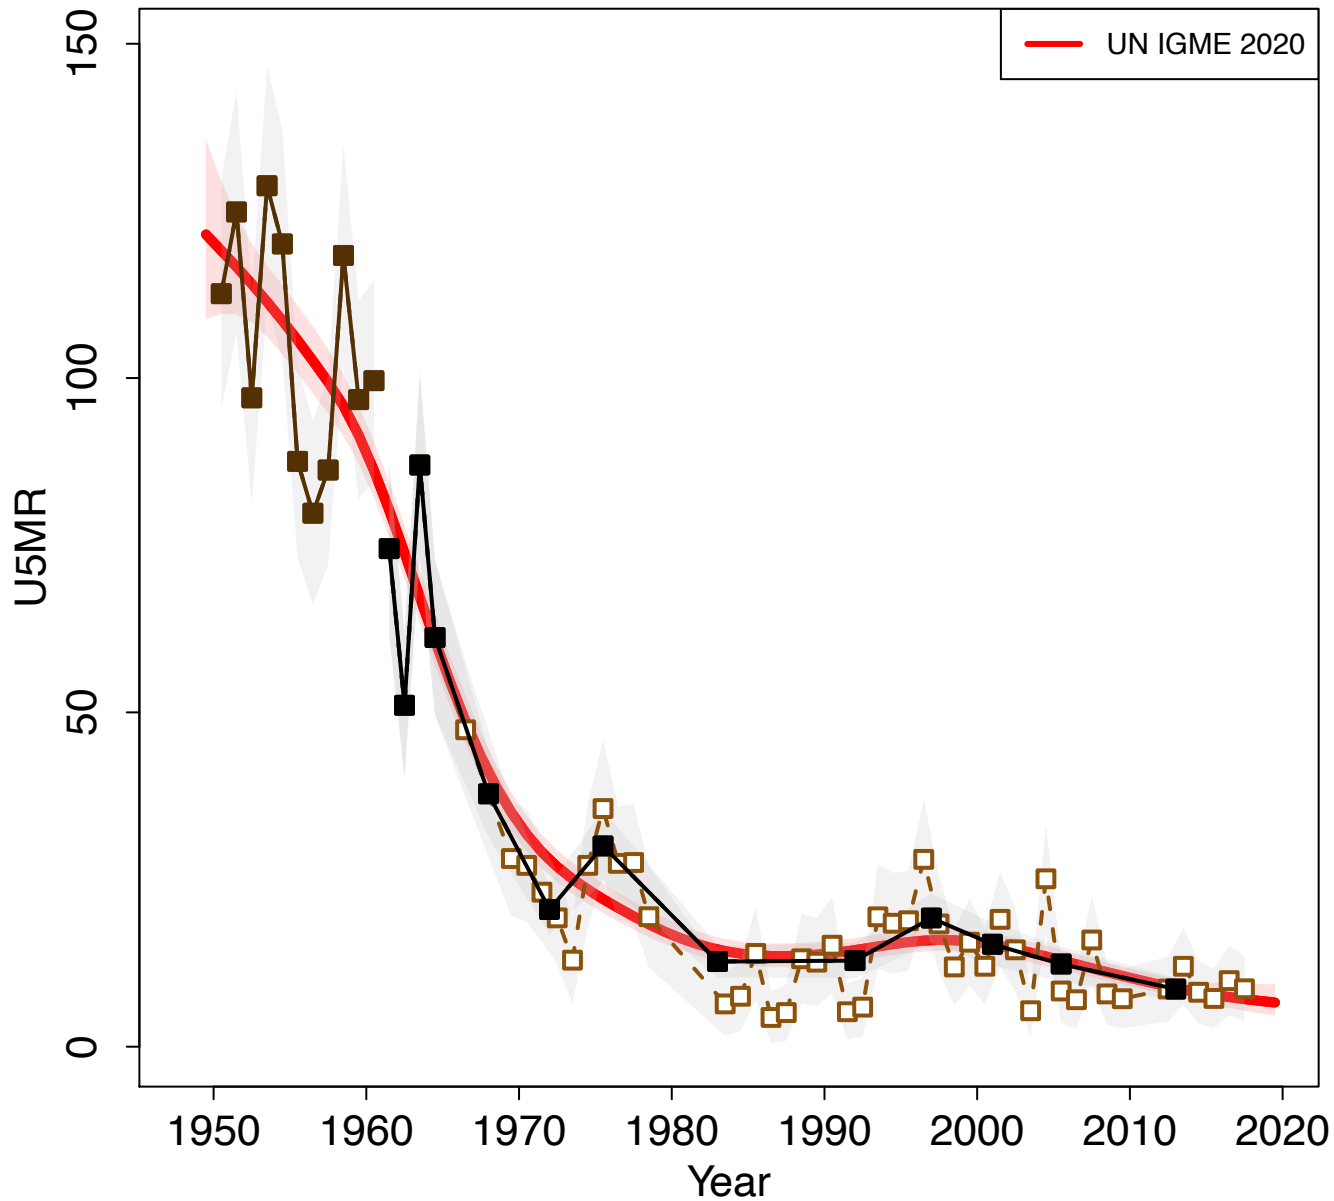

# Zoomed in

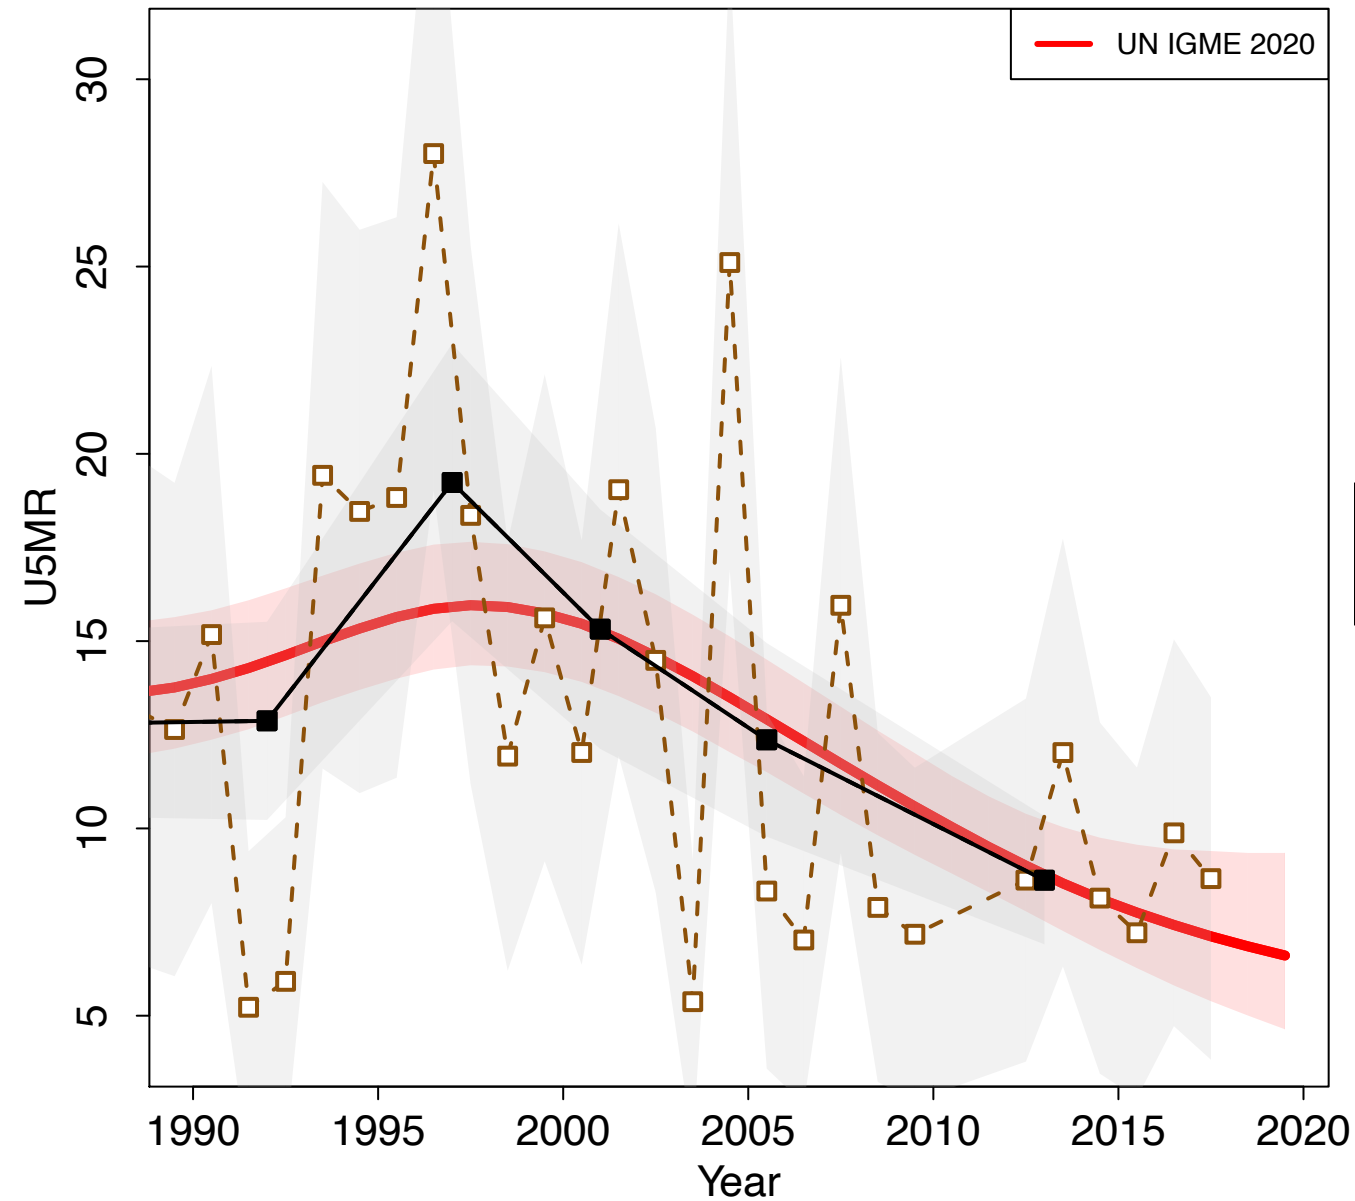

# Argentina

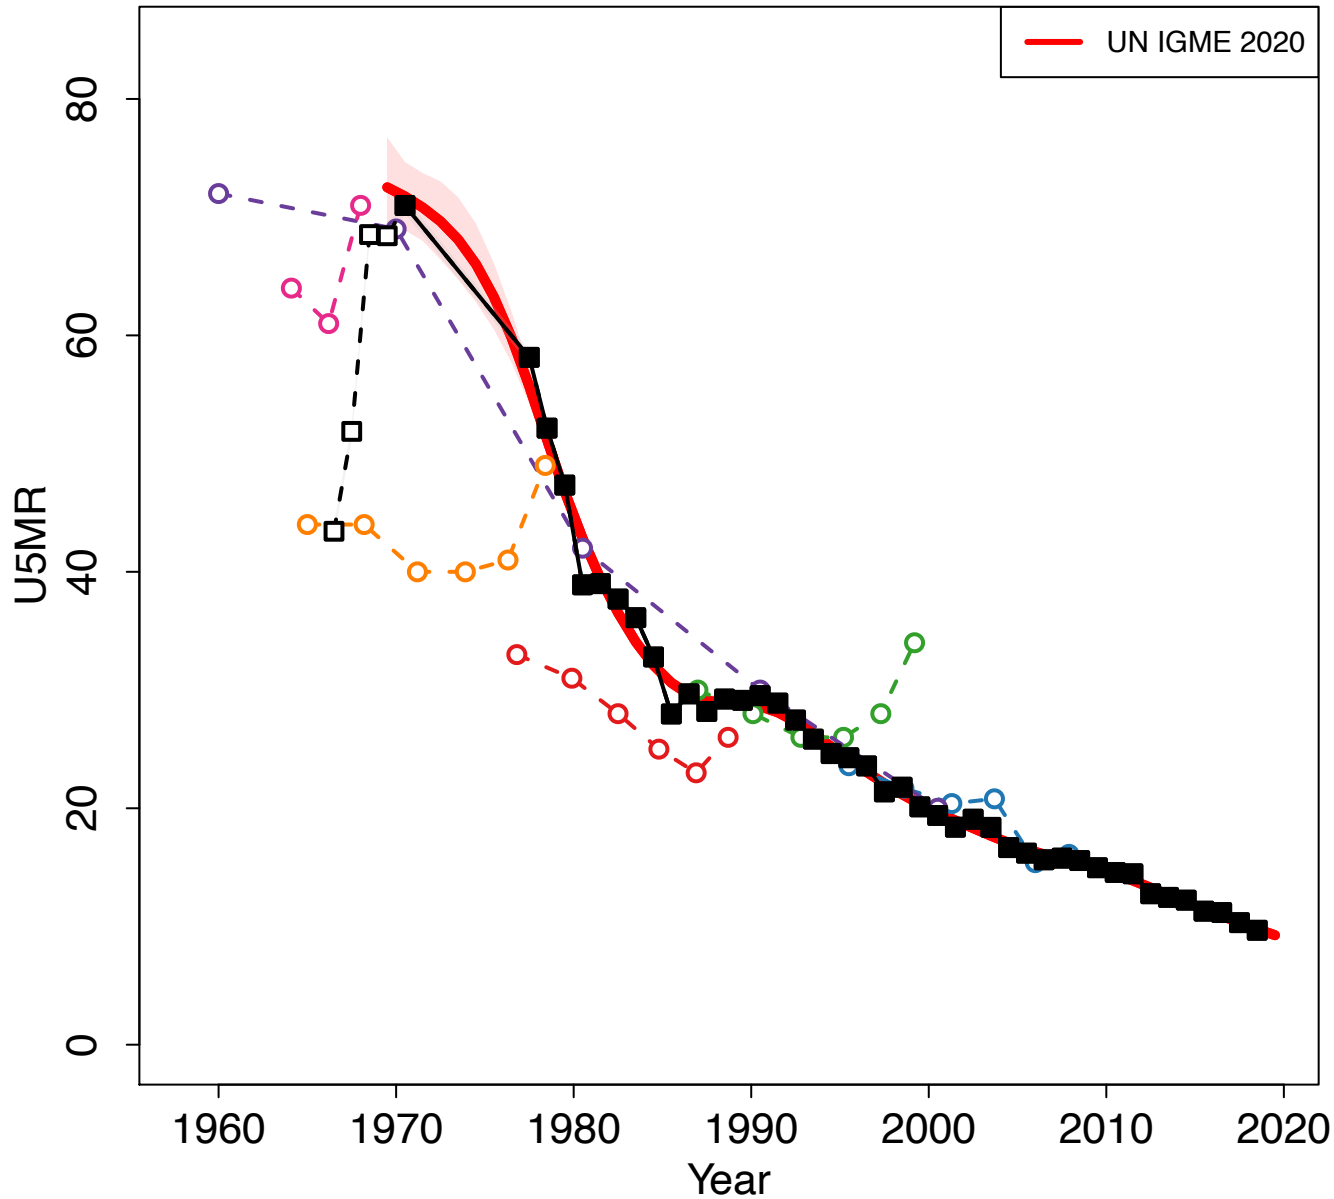

# Zoomed in

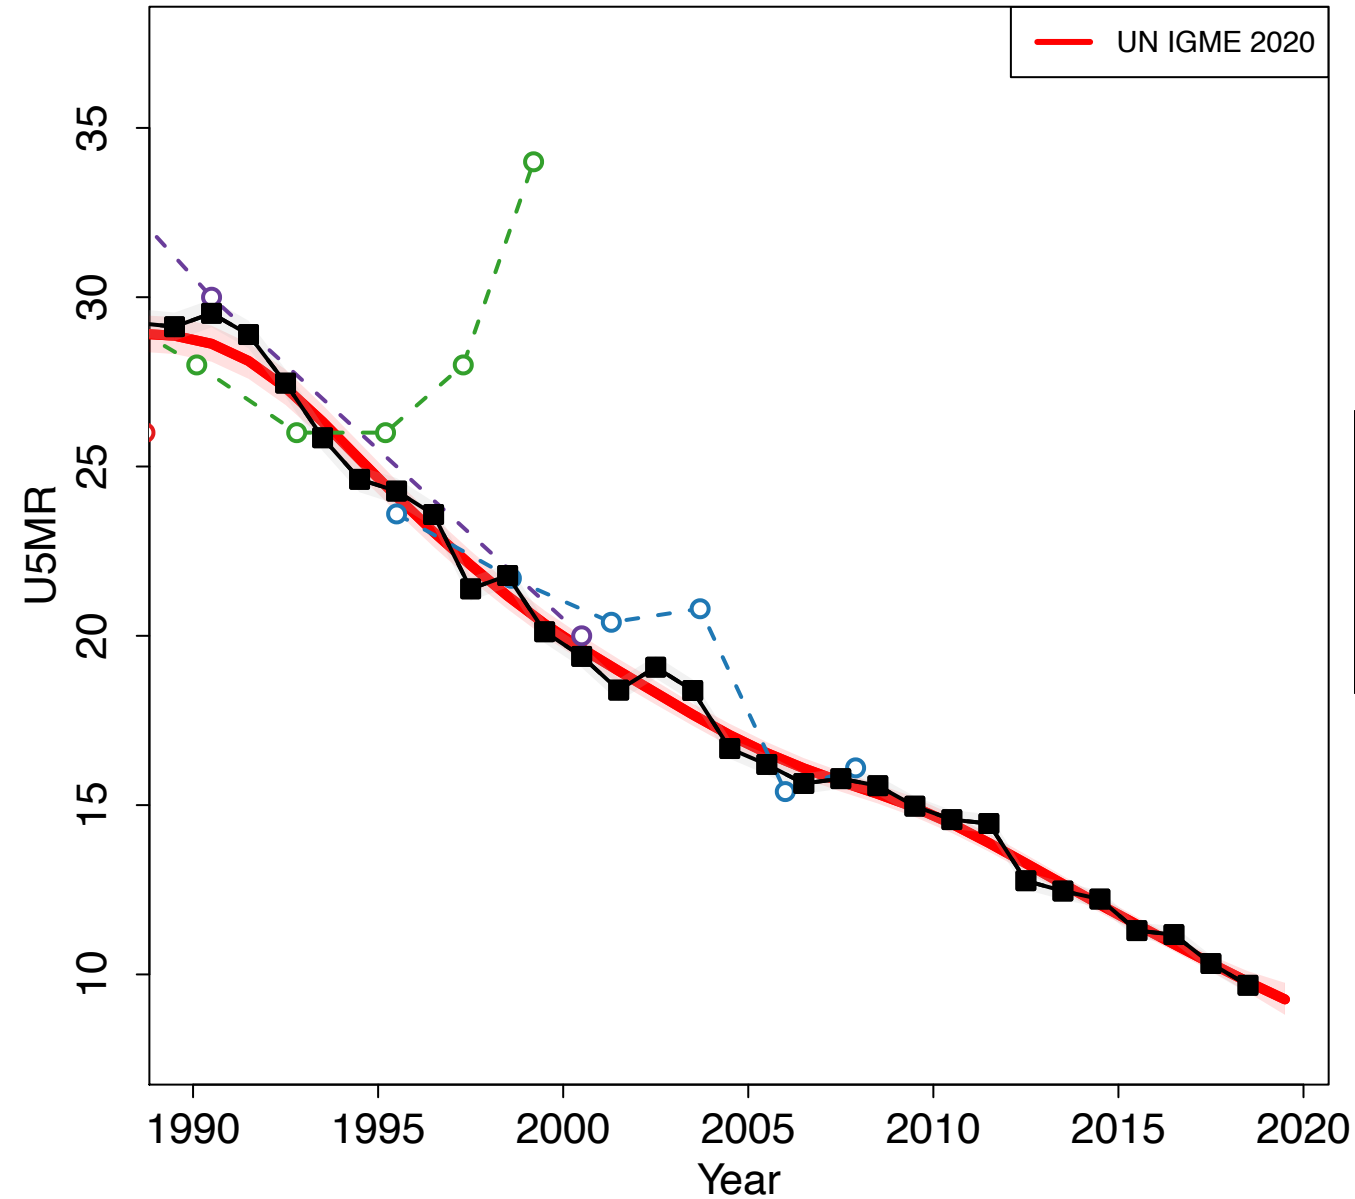

- Census 1970 (Census Indirect)
- Census 1980 (Census Indirect)
- Census 1991 (Census Indirect)
- TABLAS DE VIDA NACIONALES 2000 (Others Life Table)
- Census 2001 (Census Indirect)
- Census 2010 (Census Indirect)
- VR WHO



# Armenia

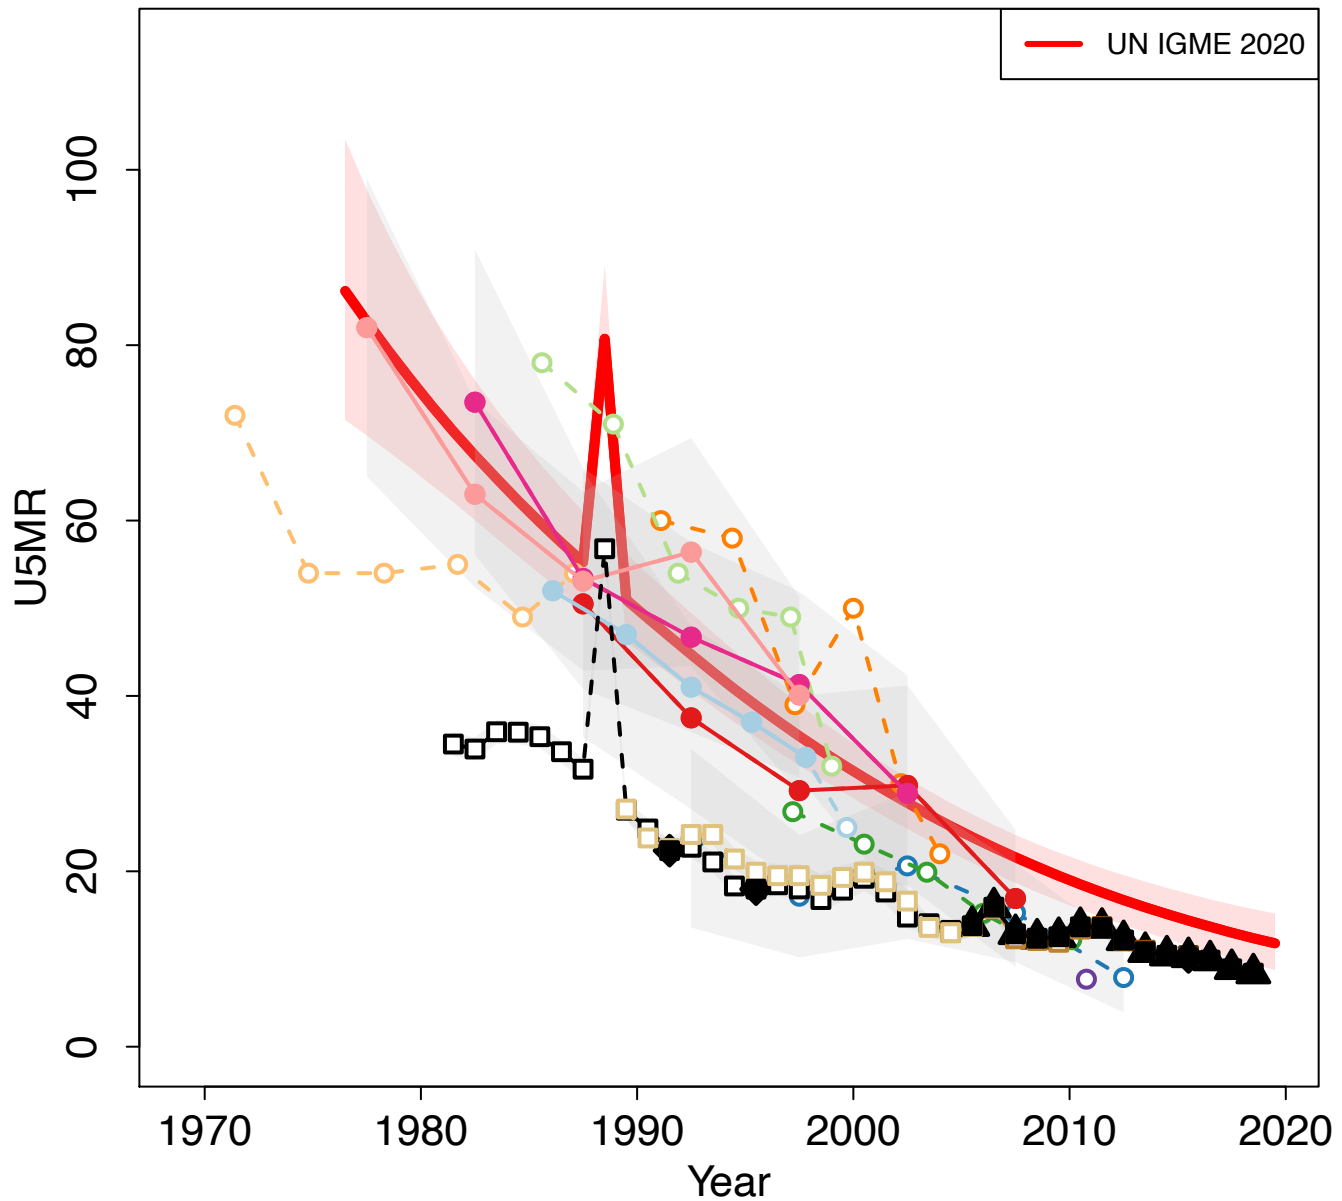

# Zoomed in

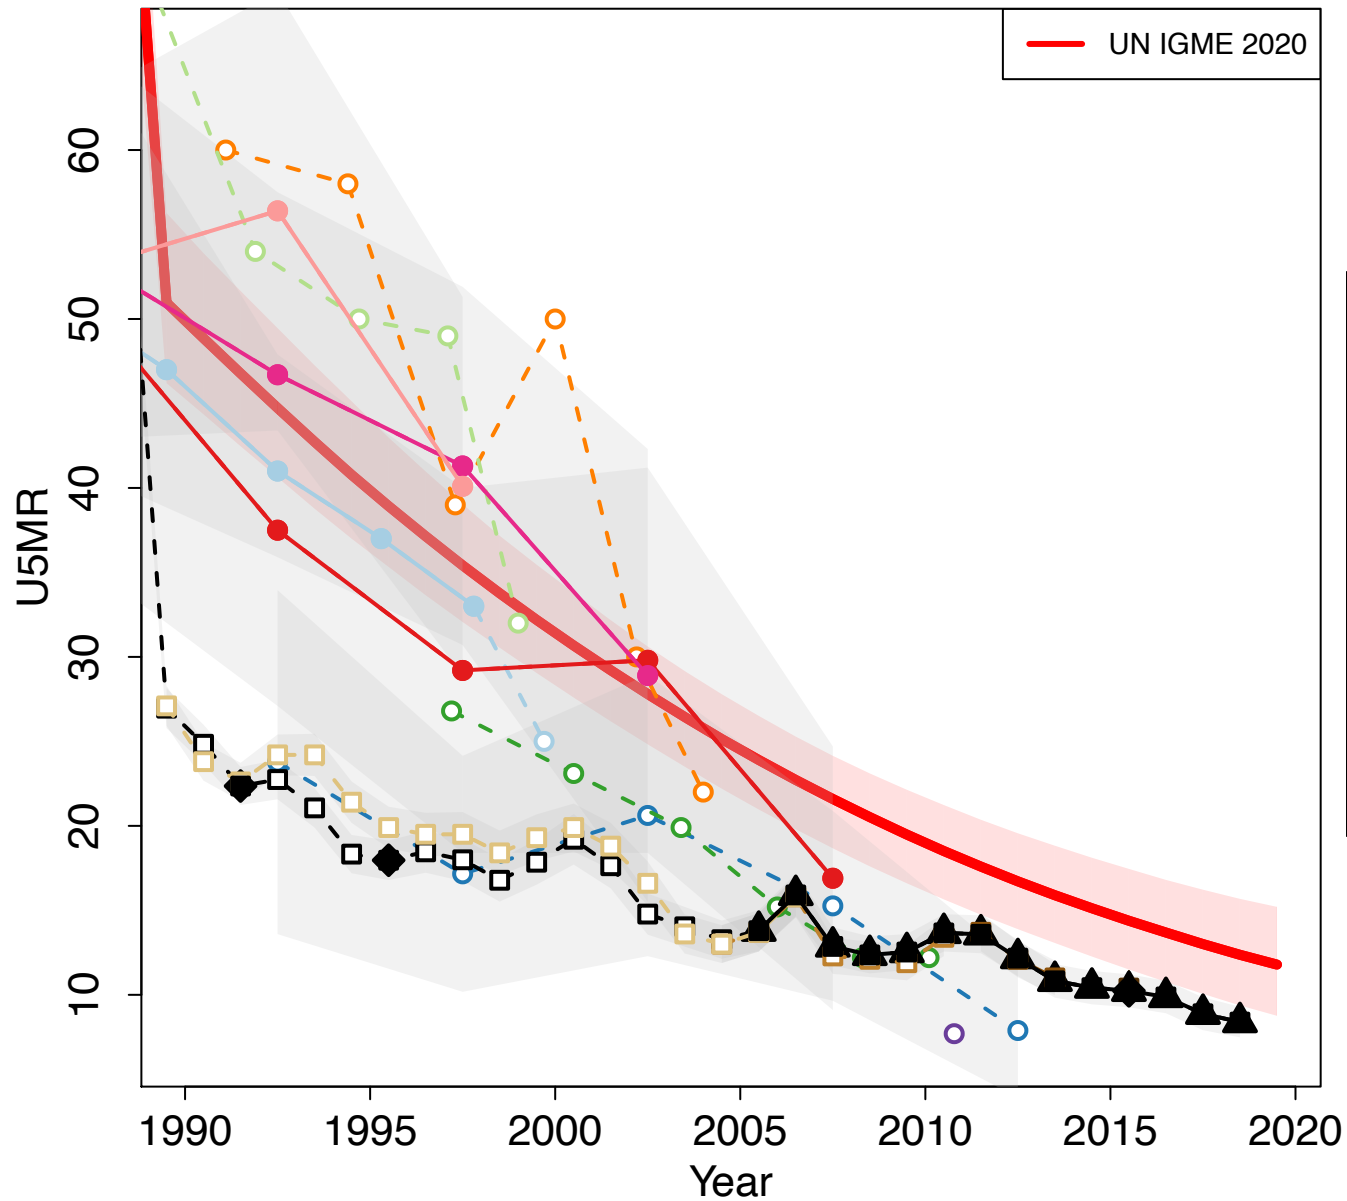

### Australia

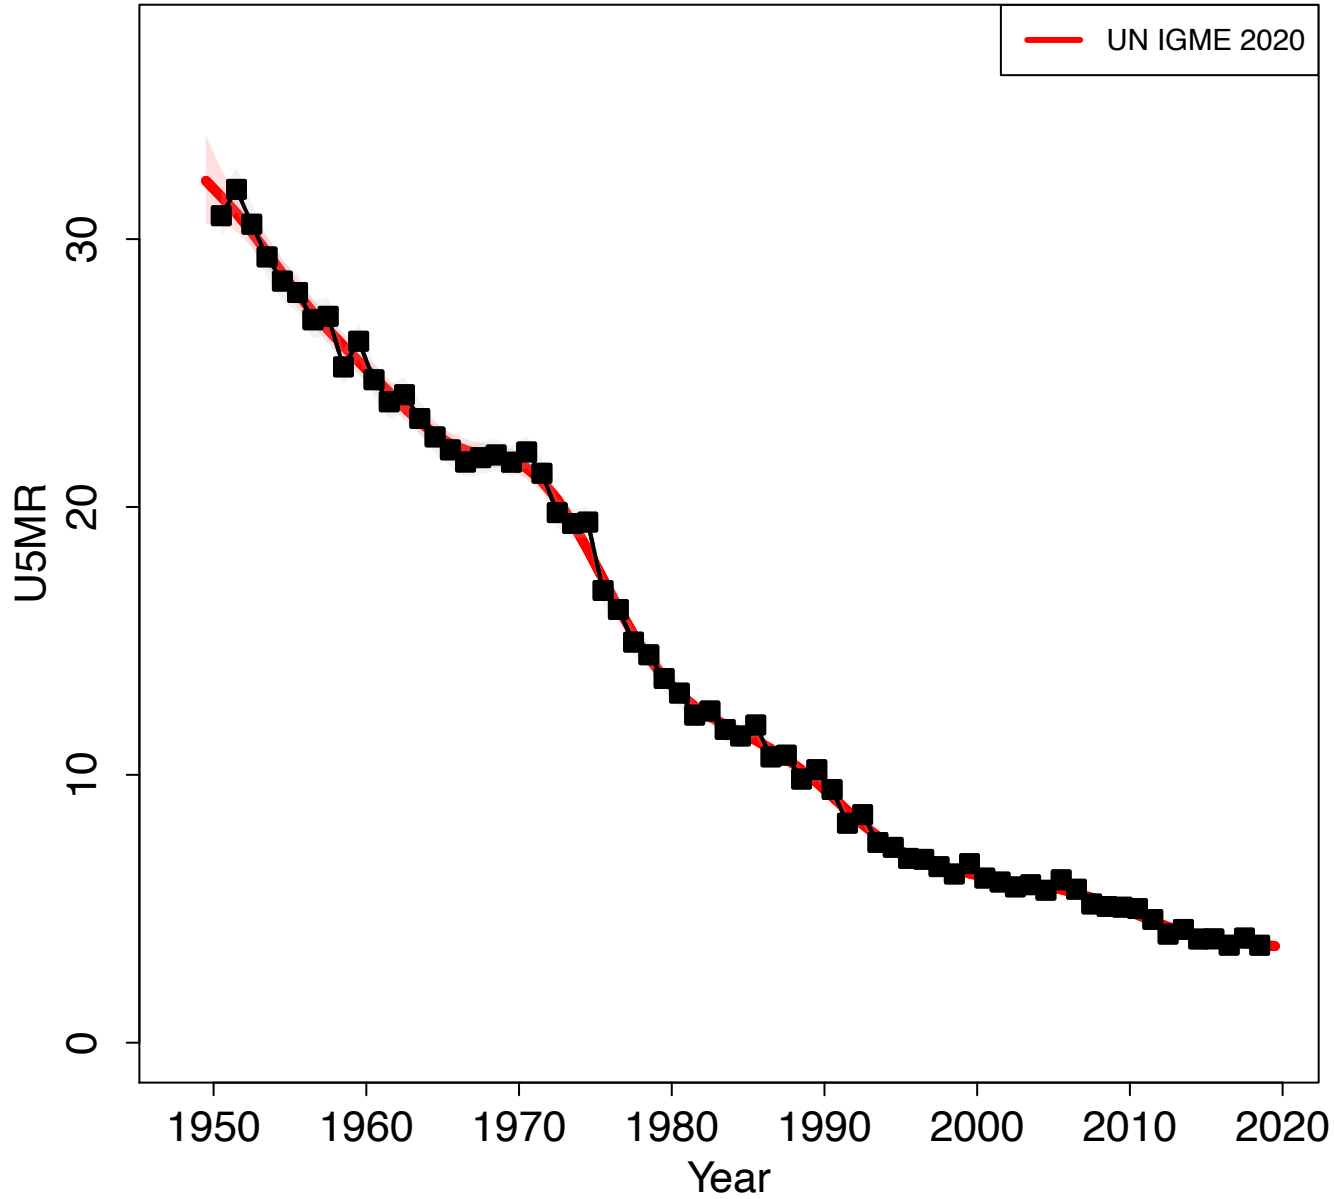

### Zoomed in

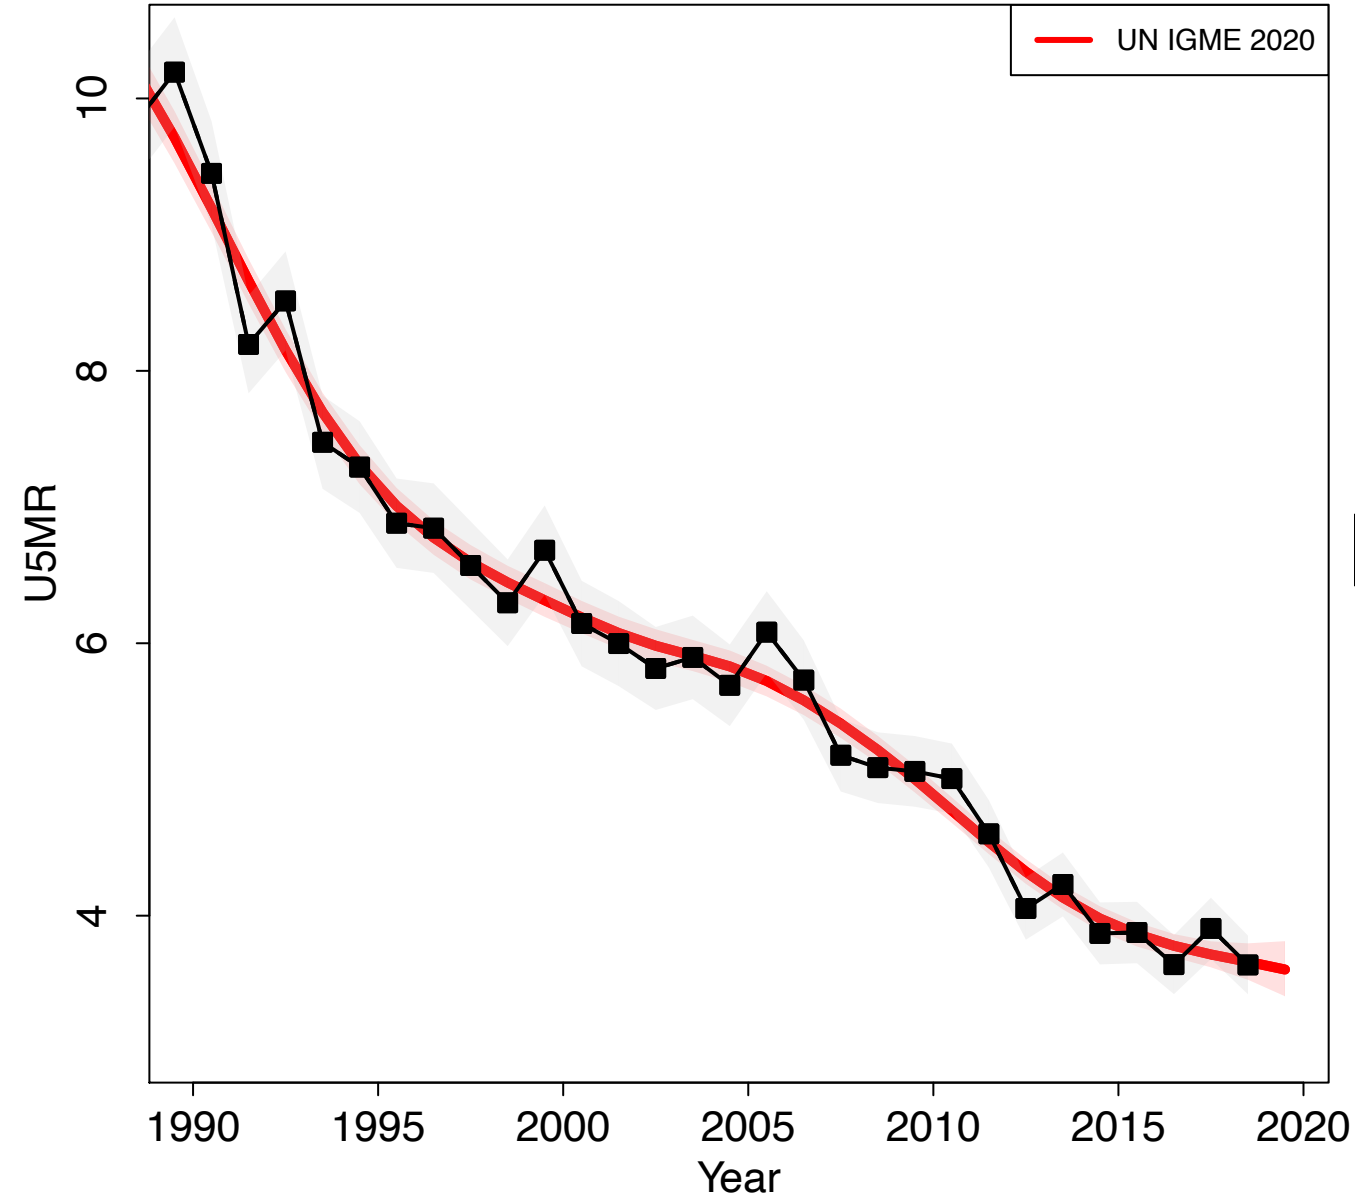

### Austria

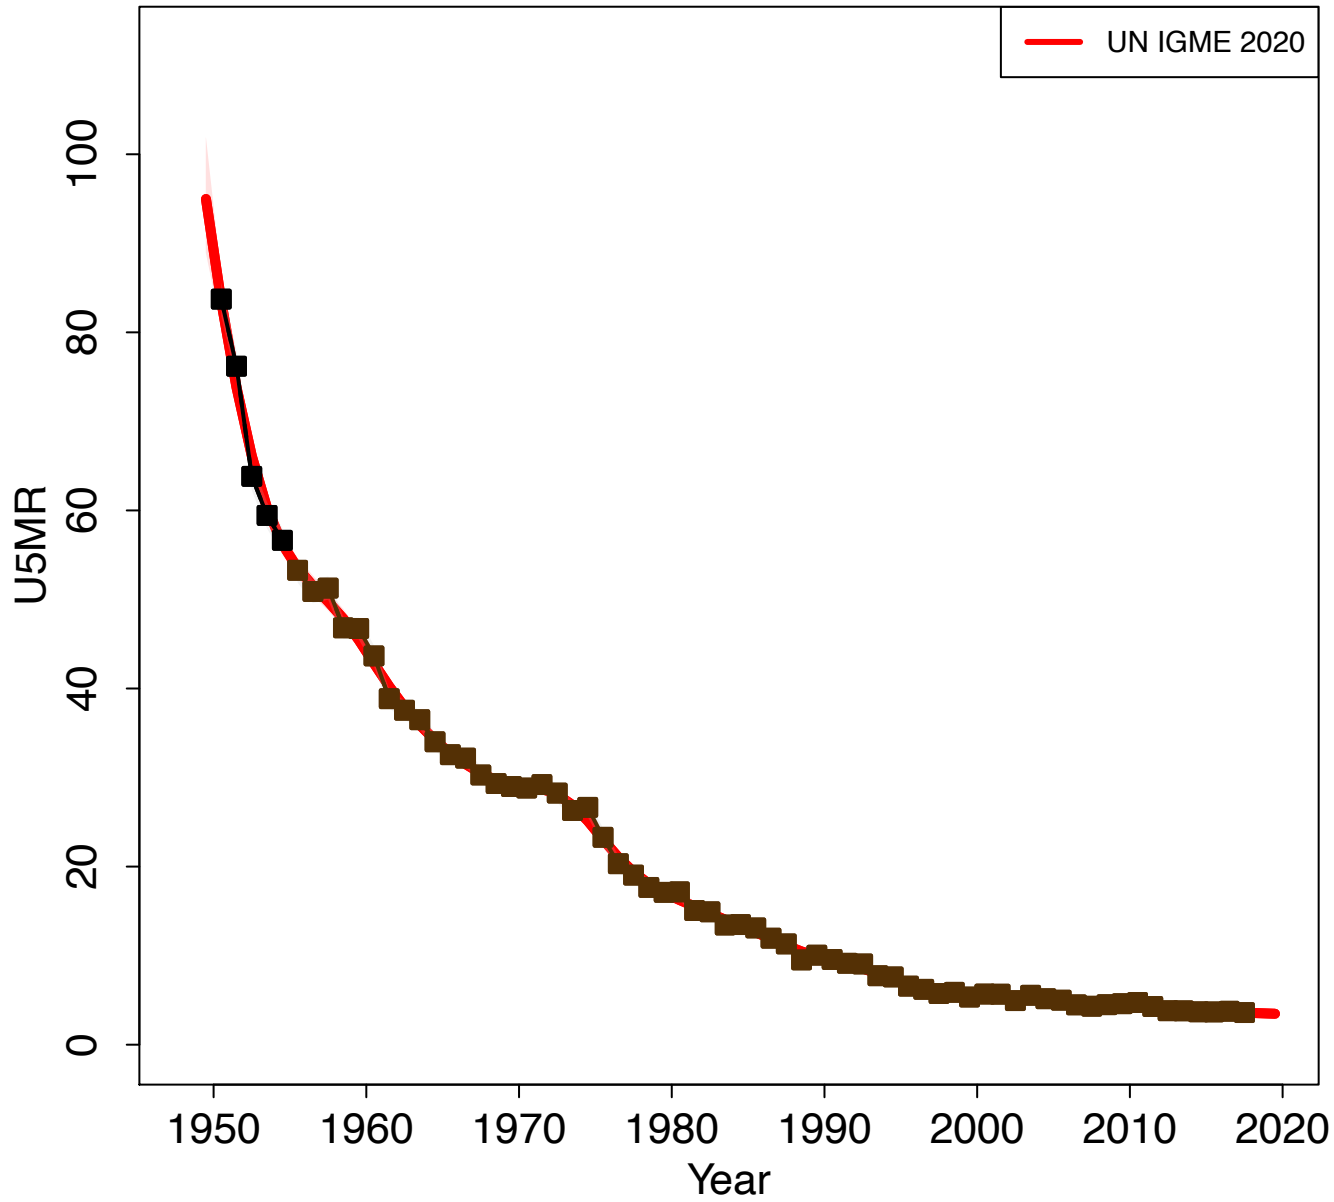

### Zoomed in

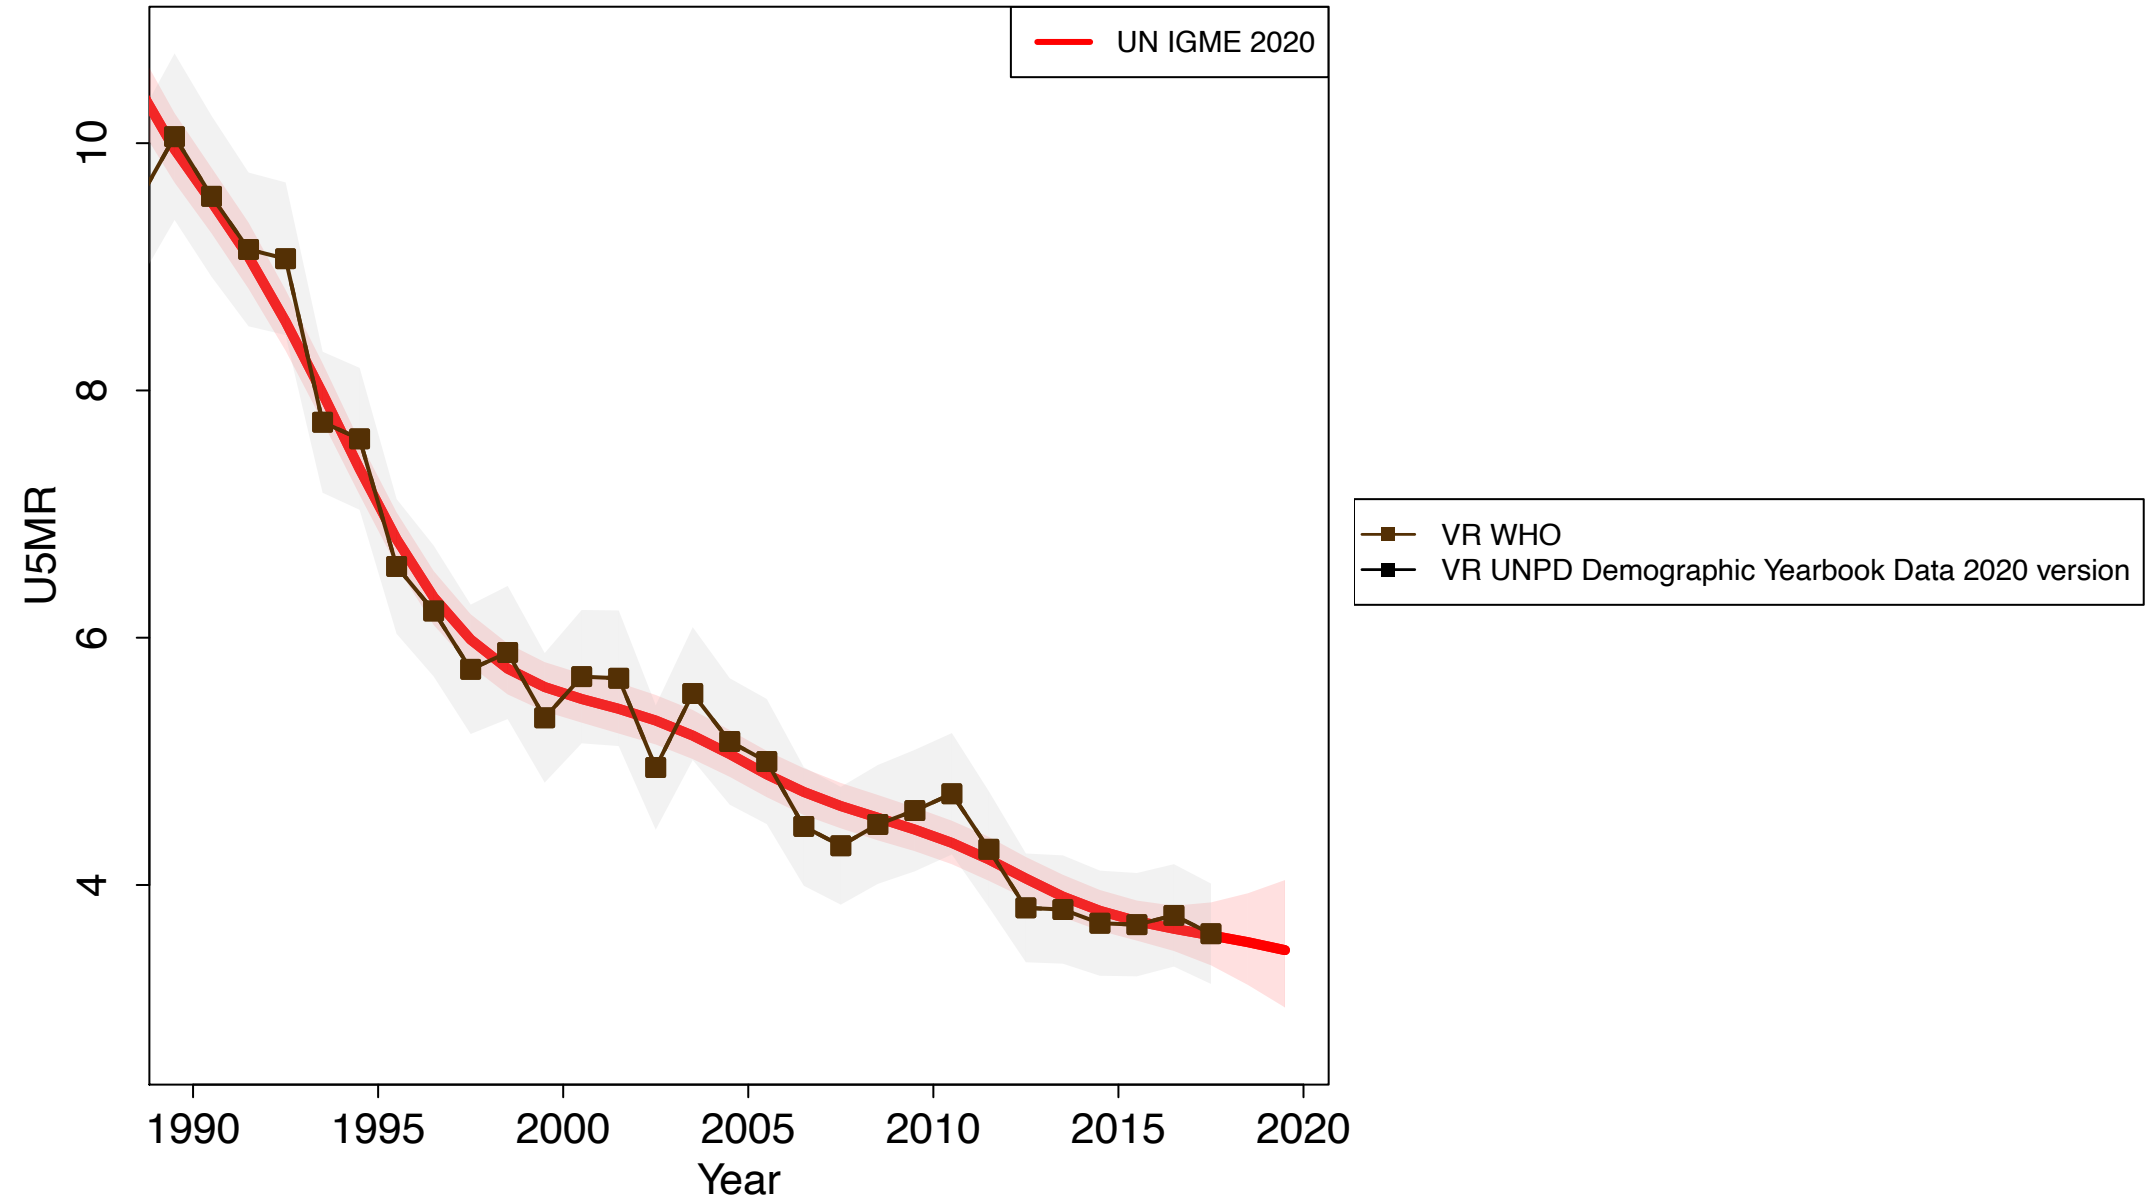

### Azerbaijan

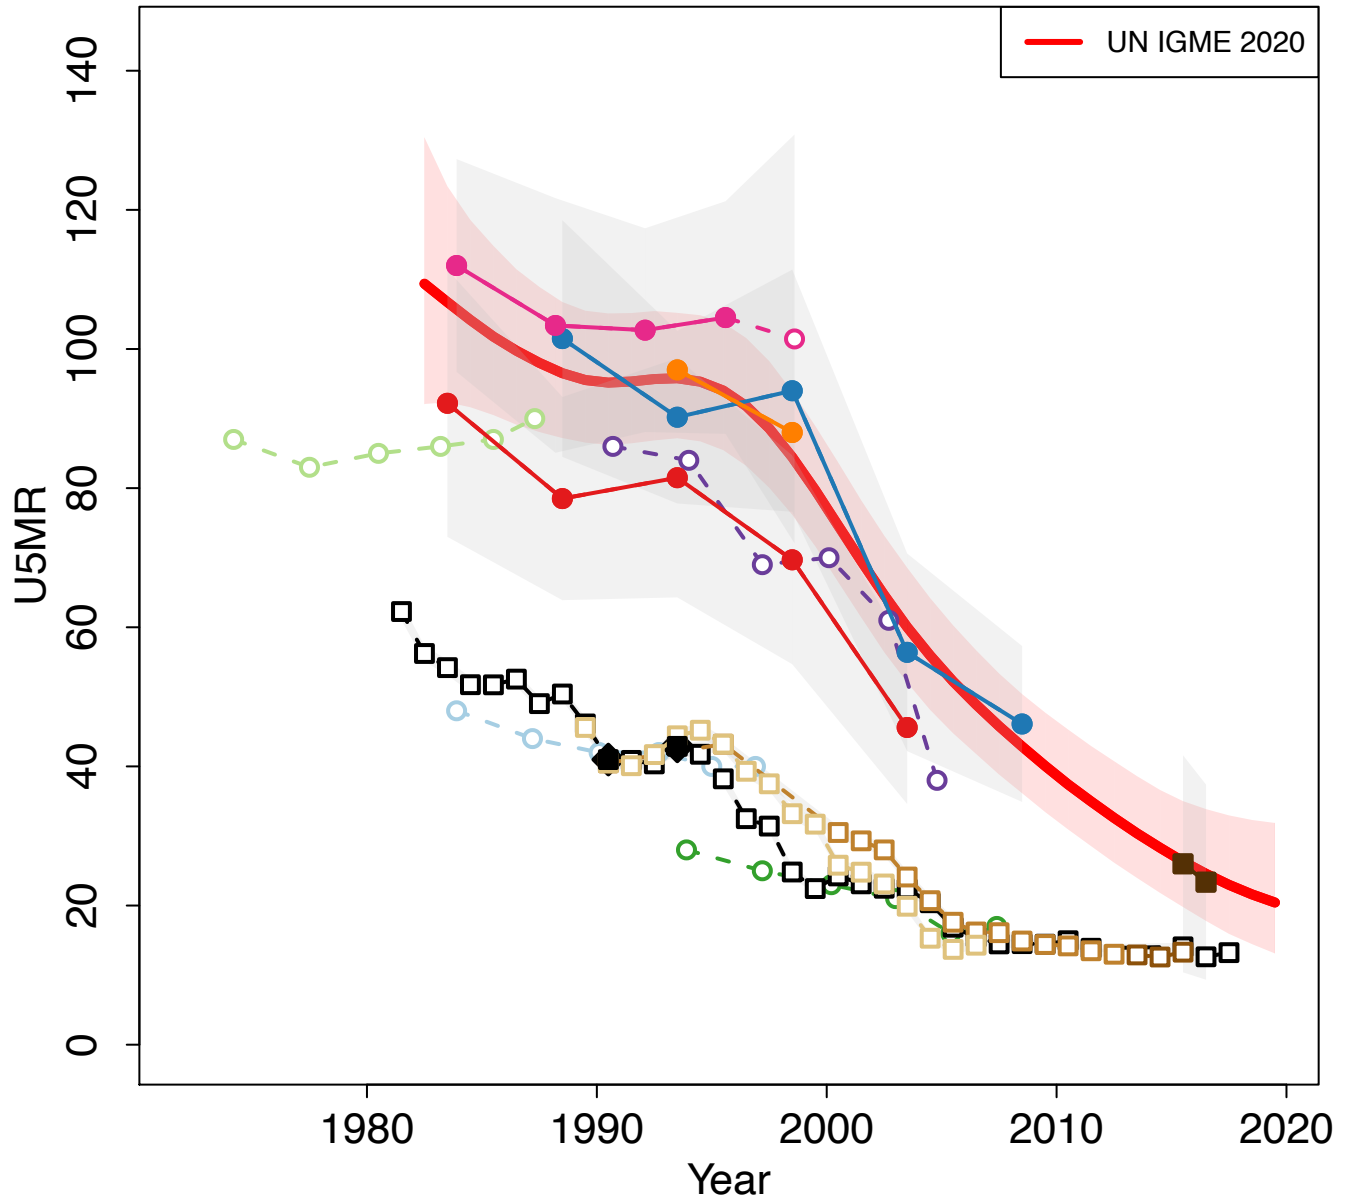

### Zoomed in

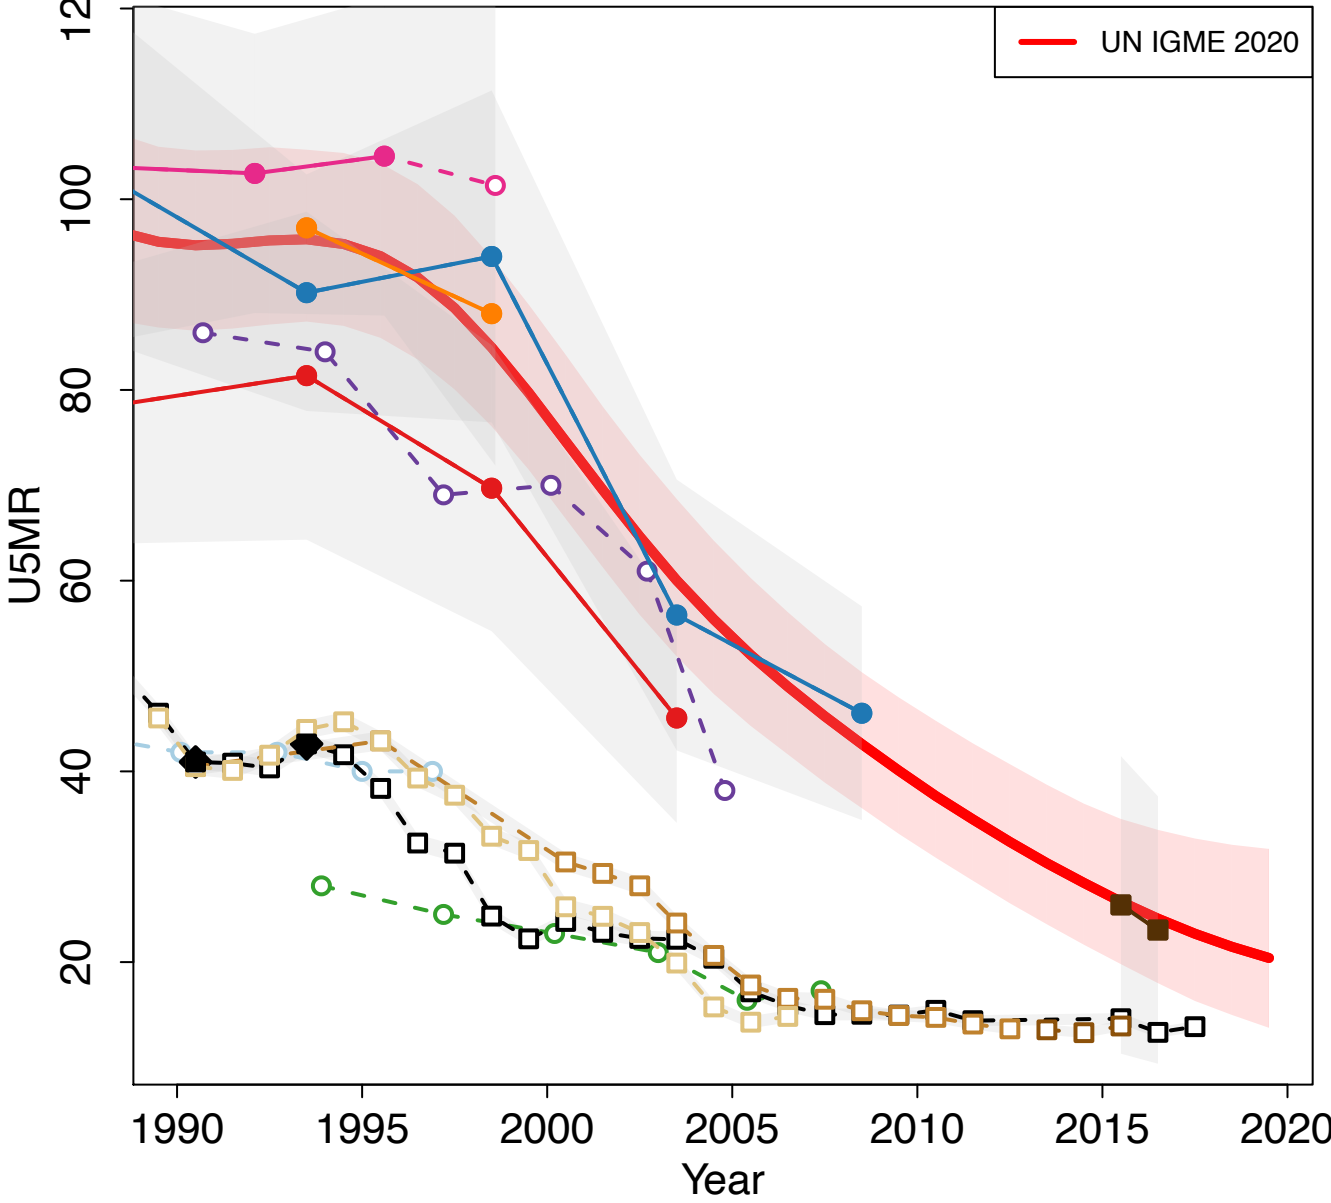

- Census 1989 (Census Indirect)
- Census 1999 (Census Indirect)
- Multiple Indicator Cluster Survey 2000 (MICS Indirect)
- Reproductive Health Survey 2001 (Others Direct)
- Demographic and Health Survey 2006 (DHS Direct)
- Demographic and Health Survey 2006 (DHS Indirect)
- Census 2009 (Census Indirect)
- Azerbaijan National DHS 2011 (Other DHS Direct)
- VR Transmonee Vital Registration Data 2008 version
- VR VR from Children in Azerbaijan Report 2013
- VR VR from Children in Azerbaijan Report 2016
- VR Adjusted National Vital Registration Data
- VR WHO

### Bahamas

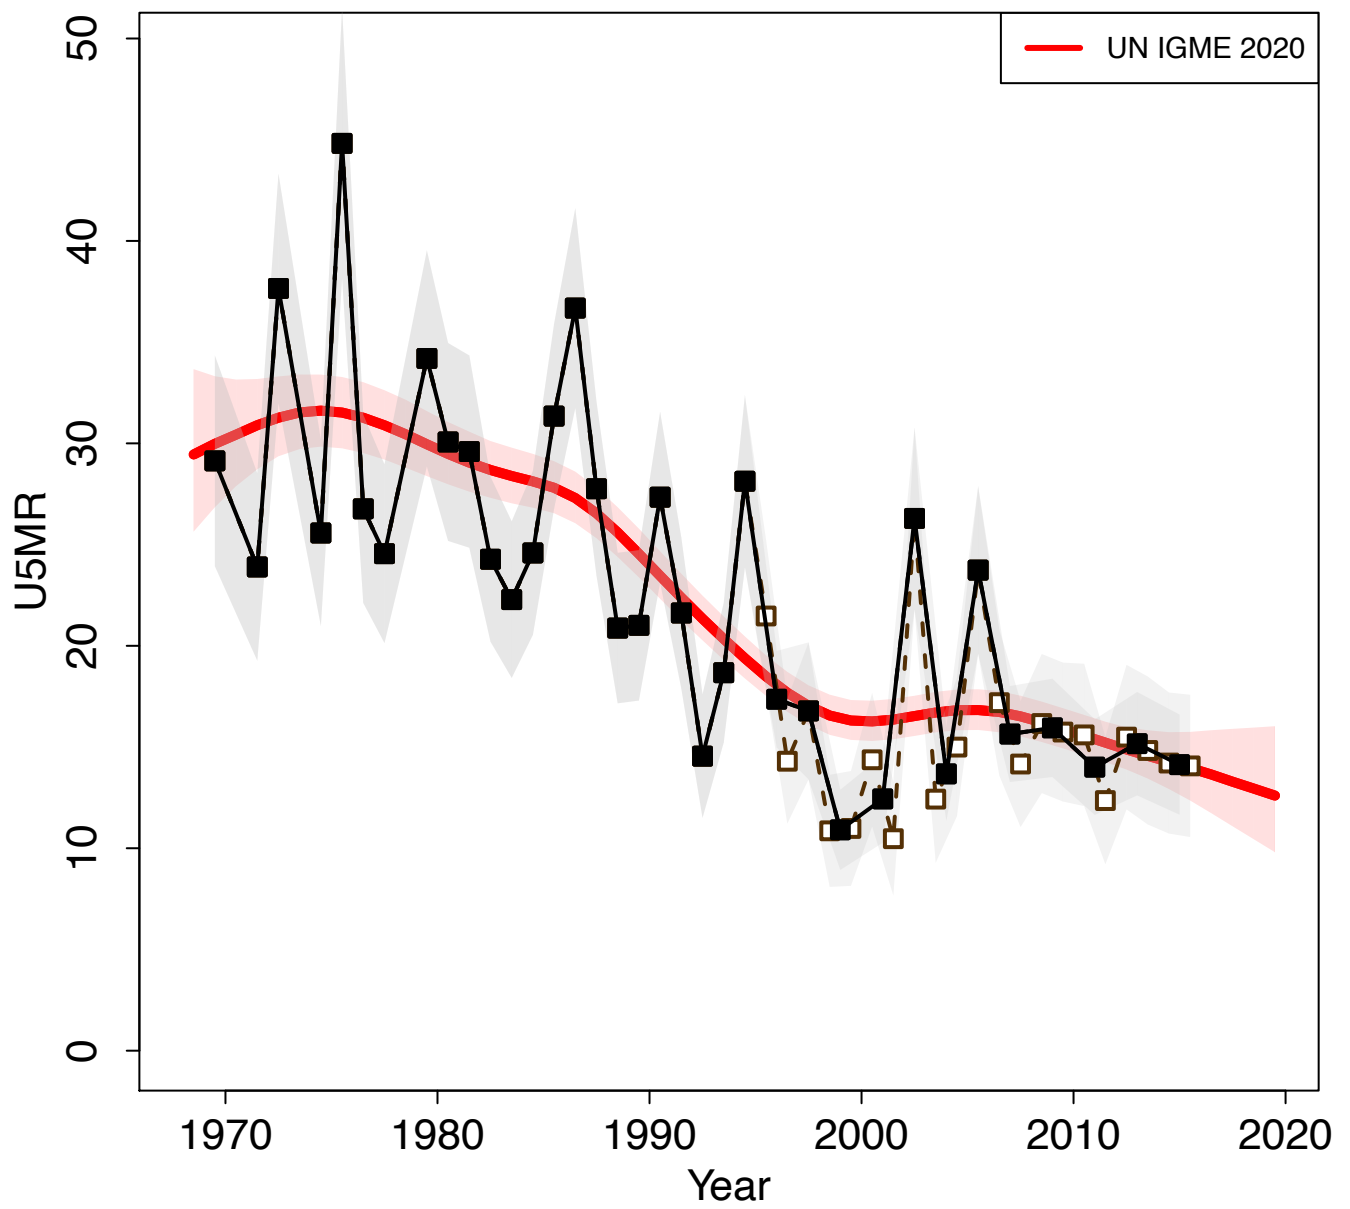

### Zoomed in

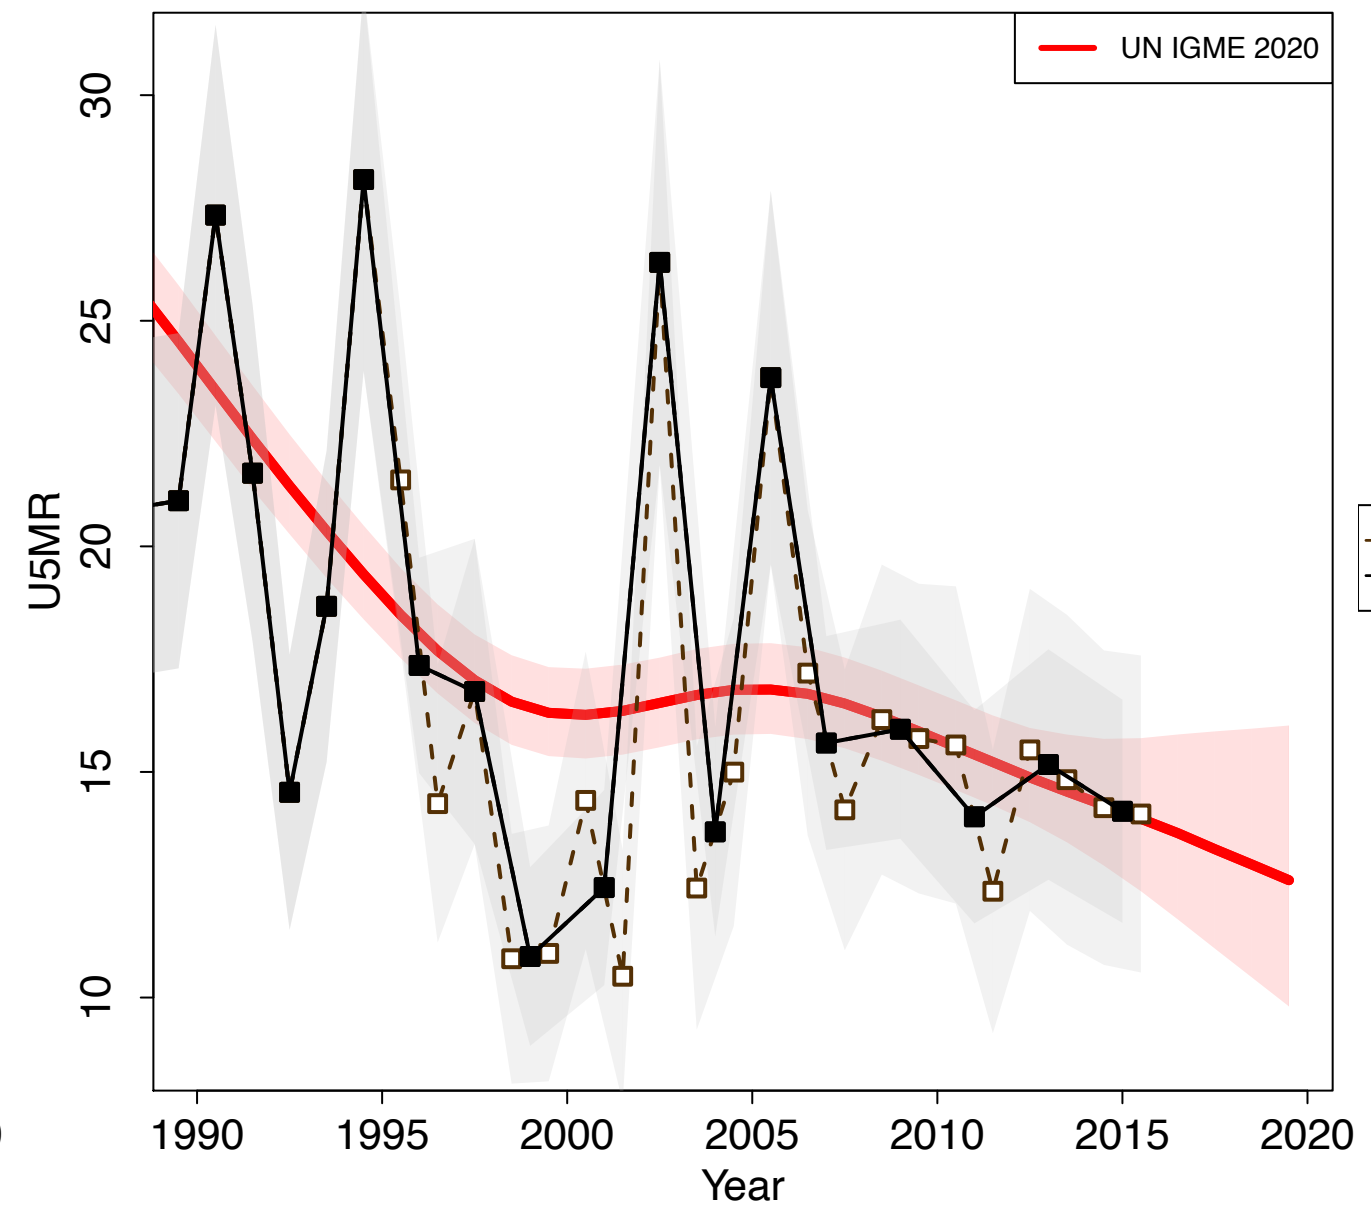

# Bahrain

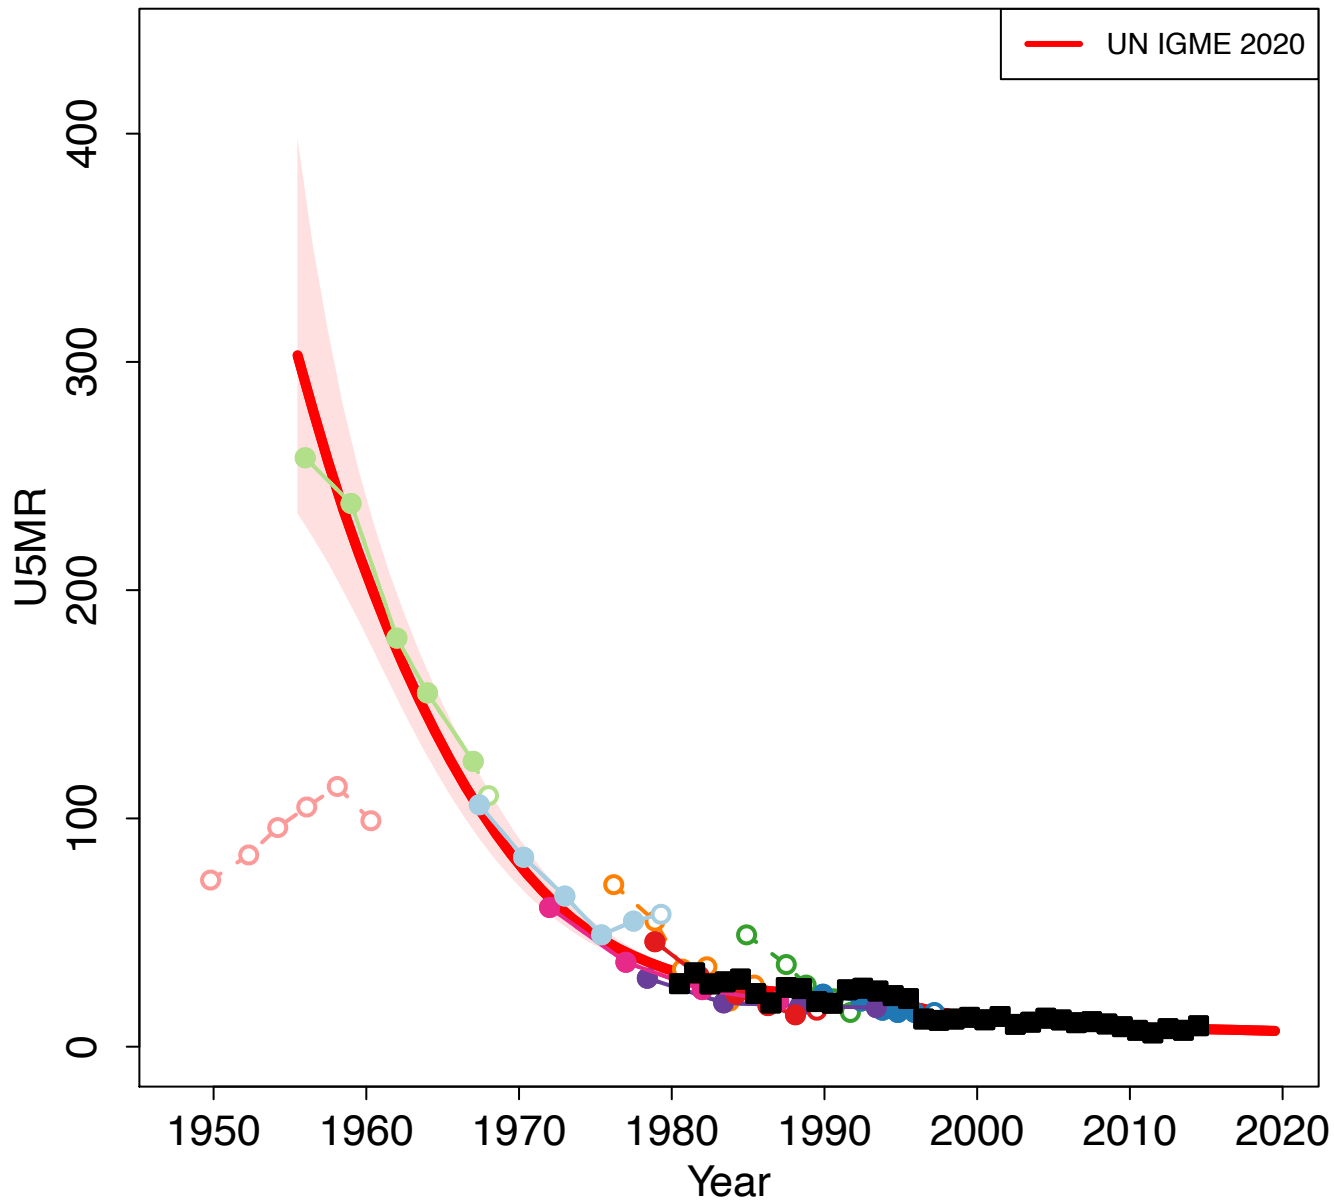

# Zoomed in

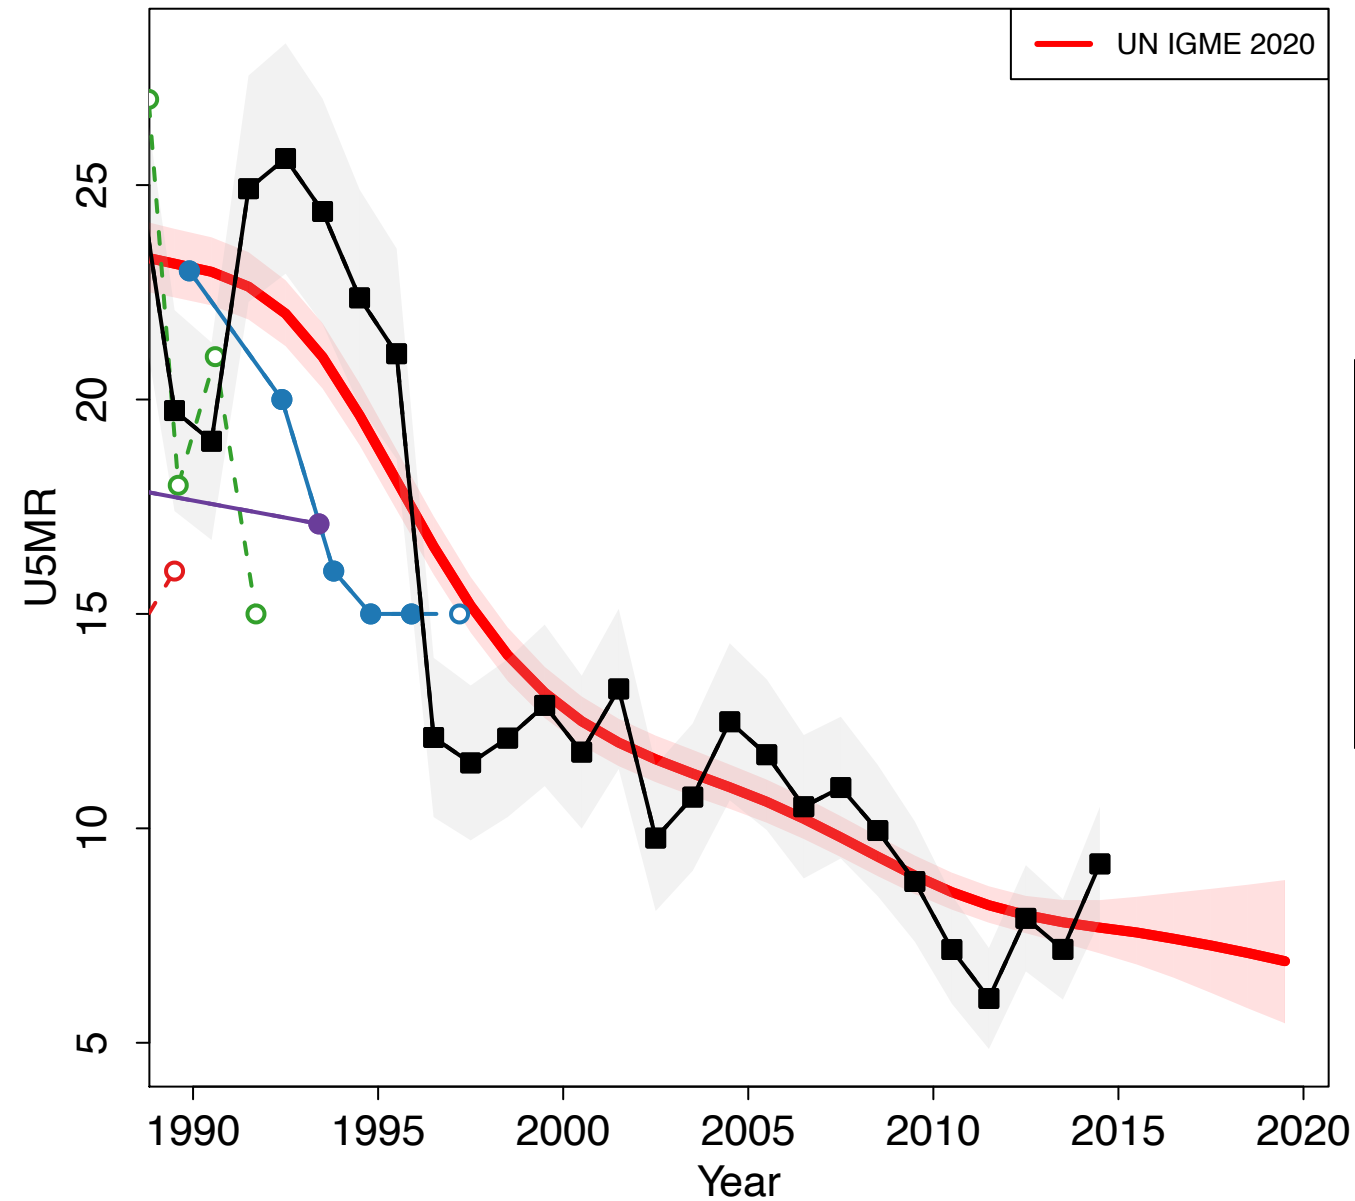

- Census 1965 (Census Indirect)
- Census 1971 (Census Indirect)
- Census 1981 (Census Indirect)
- Child Health Survey 1989 (Others Direct)
- Child Health Survey 1989 (Others Indirect)
- Census 1991 (Census Indirect)
- Gulf Family Health Survey 1995 (Others Direct)
- Gulf Family Health Survey 1995 (Others Indirect)
- Census 2001 (Census Indirect)
- VR WHO

# Bangladesh

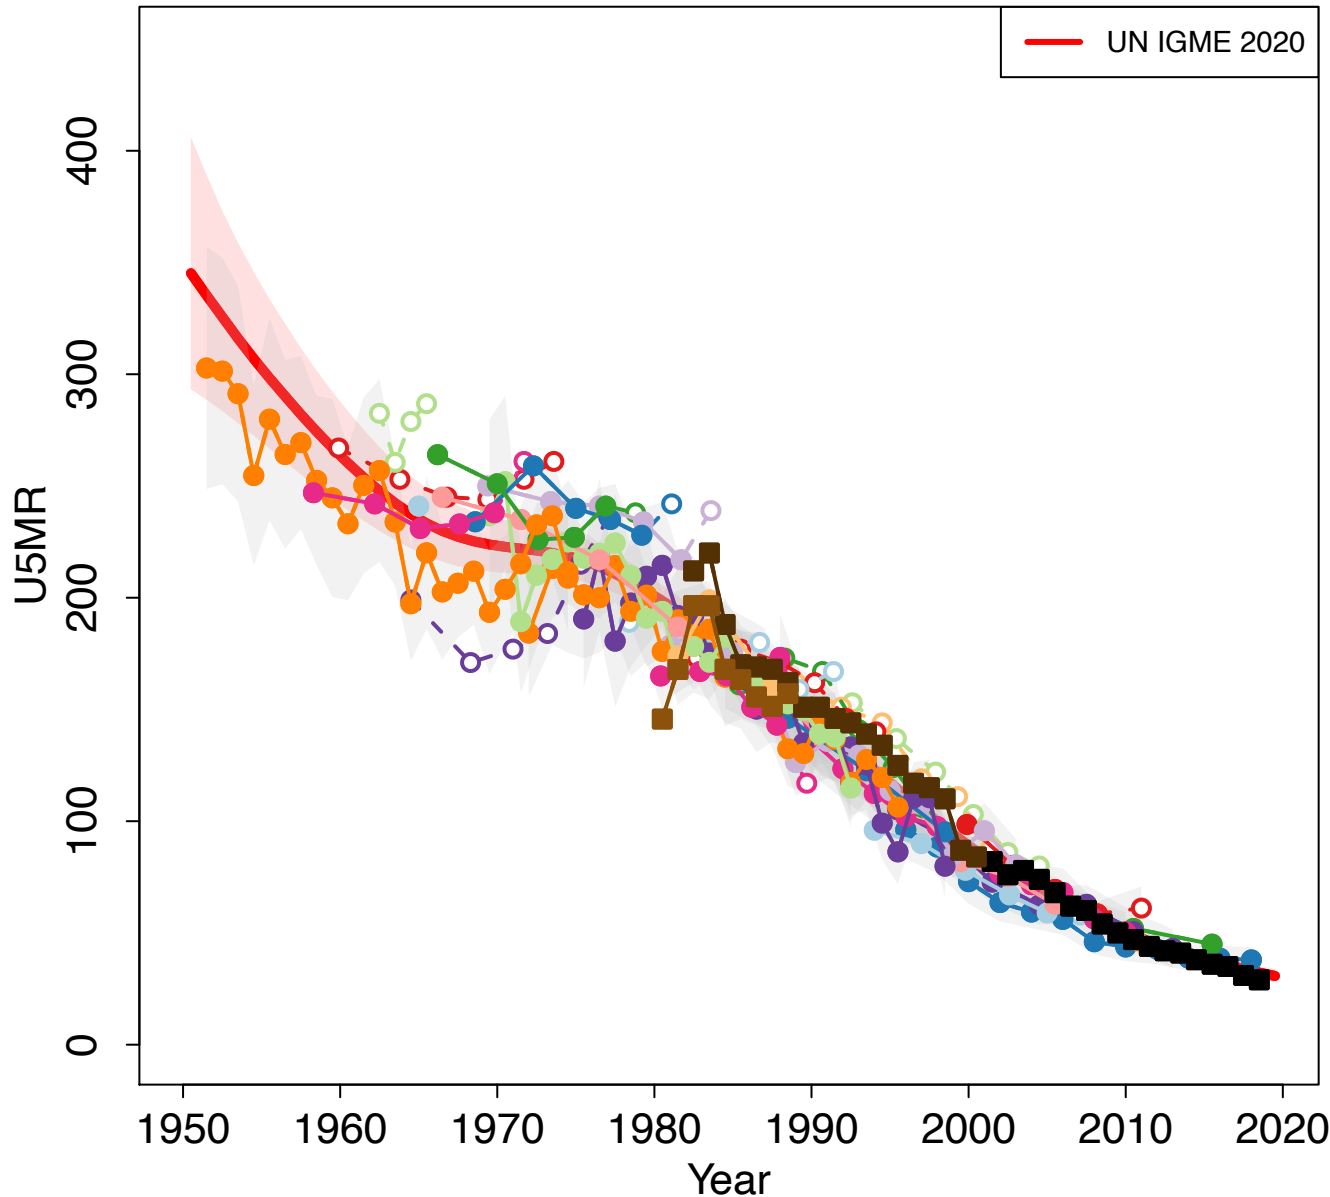

# Zoomed in

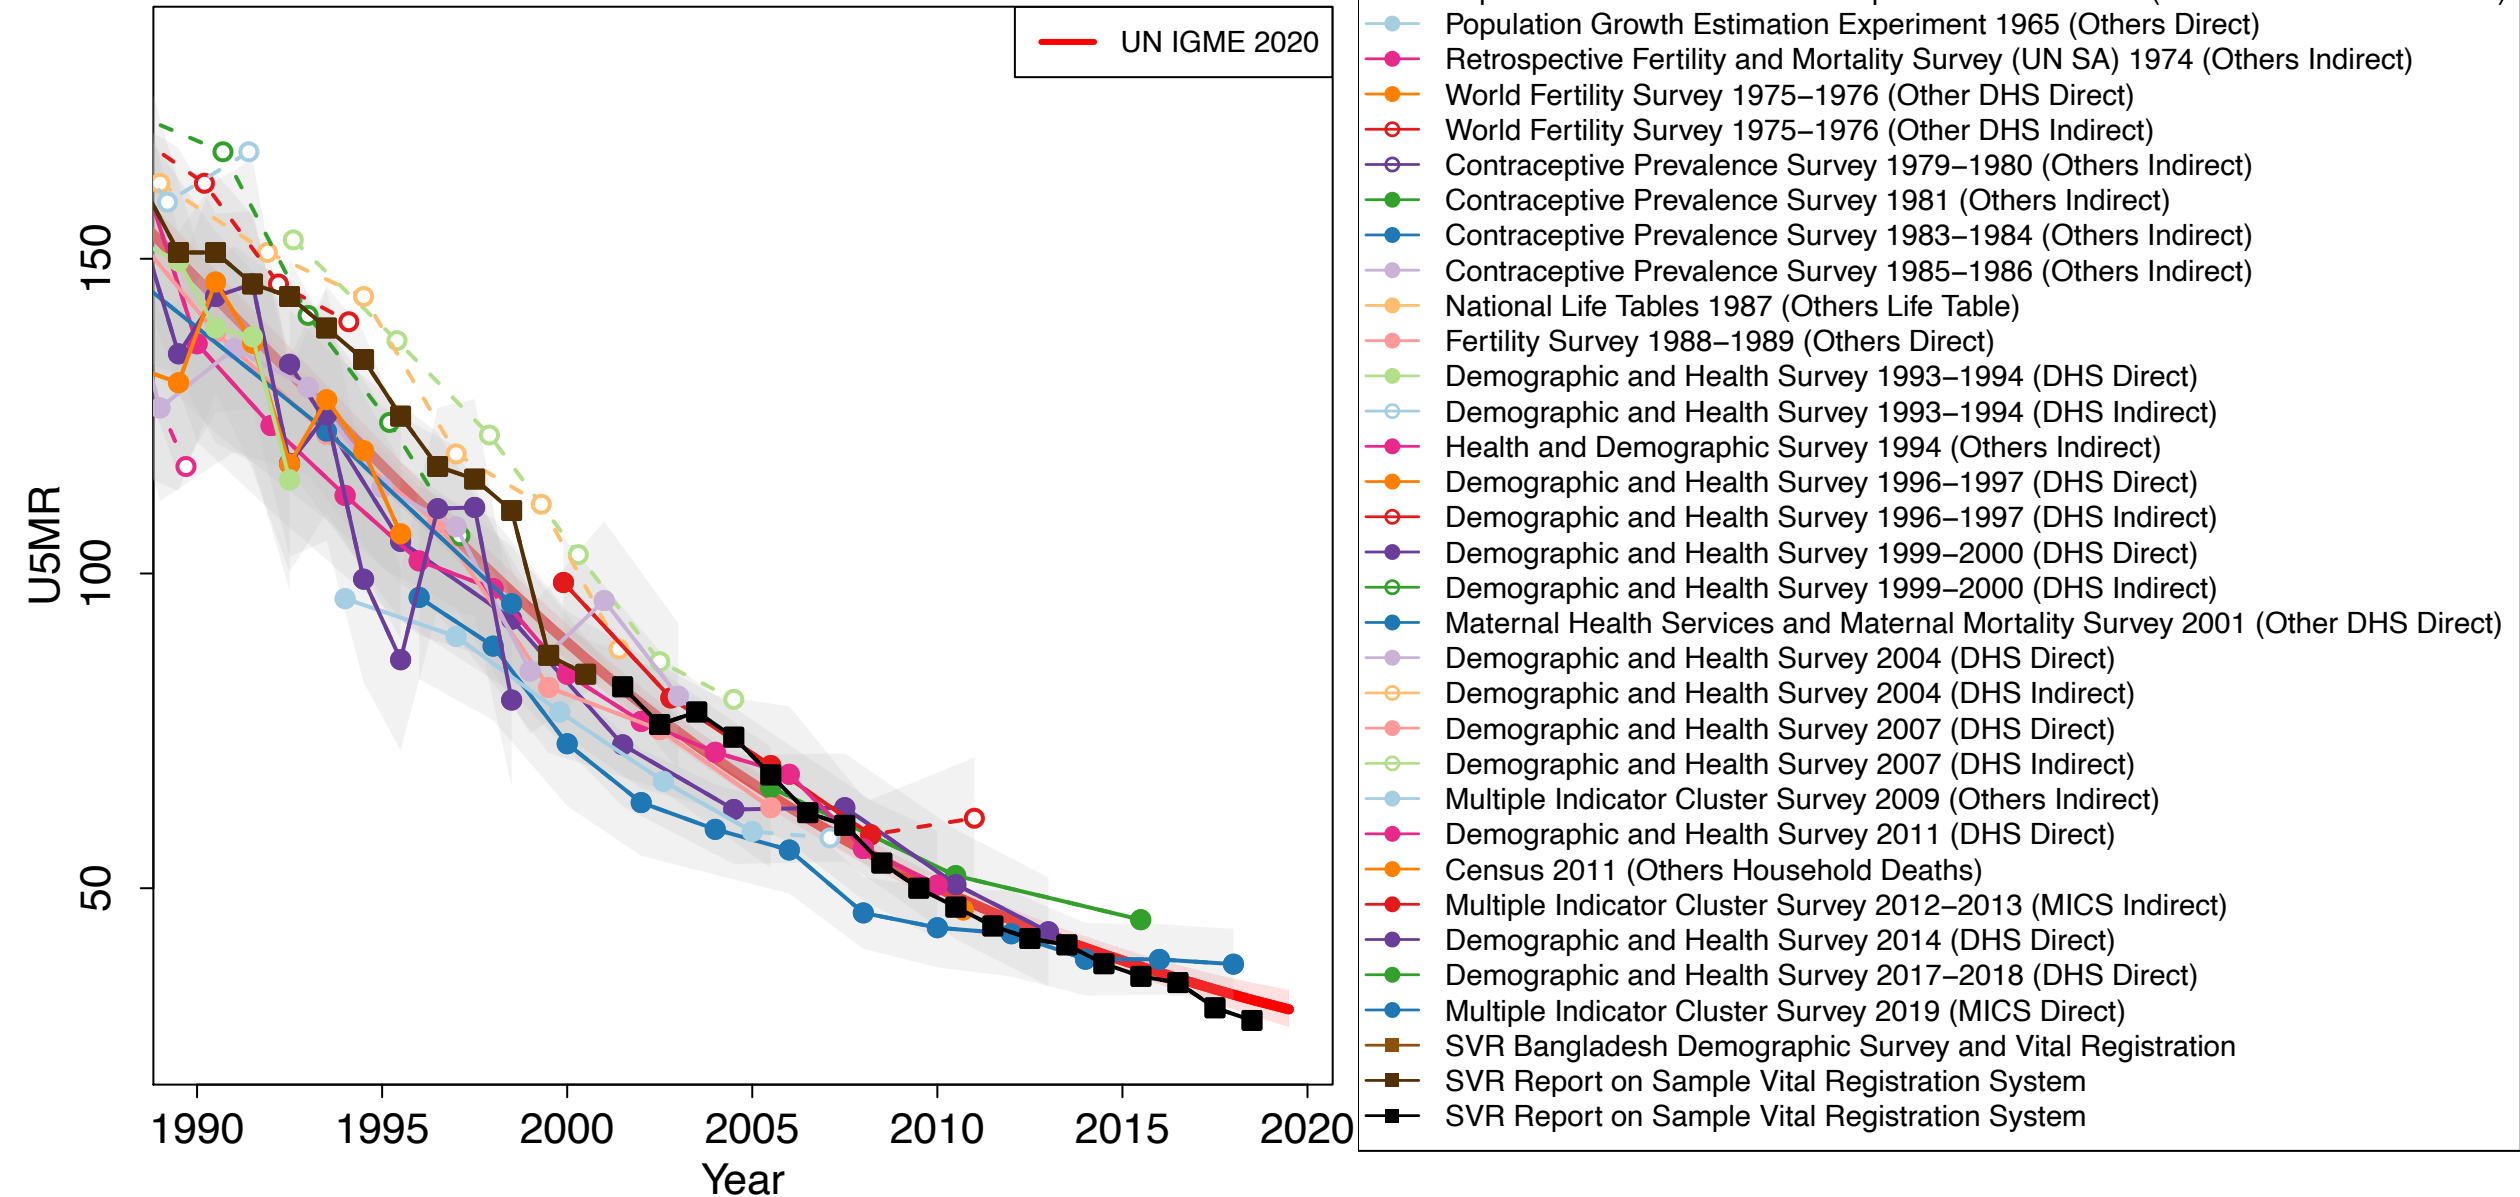

- Population Growth Estimation Experiment 1962–1965 (Others Household Deaths)
- Population Growth Estimation Experiment 1965 (Others Direct)
- Retrospective Fertility and Mortality Survey (UN SA) 1974 (Others Indirect)
- World Fertility Survey 1975–1976 (Other DHS Direct)
- World Fertility Survey 1975–1976 (Other DHS Indirect)
- Contraceptive Prevalence Survey 1979–1980 (Others Indirect)
- Contraceptive Prevalence Survey 1981 (Others Indirect)
- Contraceptive Prevalence Survey 1983–1984 (Others Indirect)
- Contraceptive Prevalence Survey 1985–1986 (Others Indirect)
- National Life Tables 1987 (Others Life Table)
- Fertility Survey 1988–1989 (Others Direct)
- Demographic and Health Survey 1993–1994 (DHS Direct)
- Demographic and Health Survey 1993–1994 (DHS Indirect)
- Health and Demographic Survey 1994 (Others Indirect)
- Demographic and Health Survey 1996–1997 (DHS Direct)
- Demographic and Health Survey 1996–1997 (DHS Indirect)
- Demographic and Health Survey 1999–2000 (DHS Direct)
- Demographic and Health Survey 1999–2000 (DHS Indirect)
- Maternal Health Services and Maternal Mortality Survey 2001 (Other DHS Direct)
- Demographic and Health Survey 2004 (DHS Direct)
- Demographic and Health Survey 2004 (DHS Indirect)
- Demographic and Health Survey 2007 (DHS Direct)
- Demographic and Health Survey 2007 (DHS Indirect)
- Multiple Indicator Cluster Survey 2009 (Others Indirect)
- Demographic and Health Survey 2011 (DHS Direct)
- Census 2011 (Others Household Deaths)
- Multiple Indicator Cluster Survey 2012–2013 (MICS Indirect)
- Demographic and Health Survey 2014 (DHS Direct)
- Demographic and Health Survey 2017–2018 (DHS Direct)
- Multiple Indicator Cluster Survey 2019 (MICS Direct)
- SVR Bangladesh Demographic Survey and Vital Registration
- SVR Report on Sample Vital Registration System
- SVR Report on Sample Vital Registration System

# Barbados

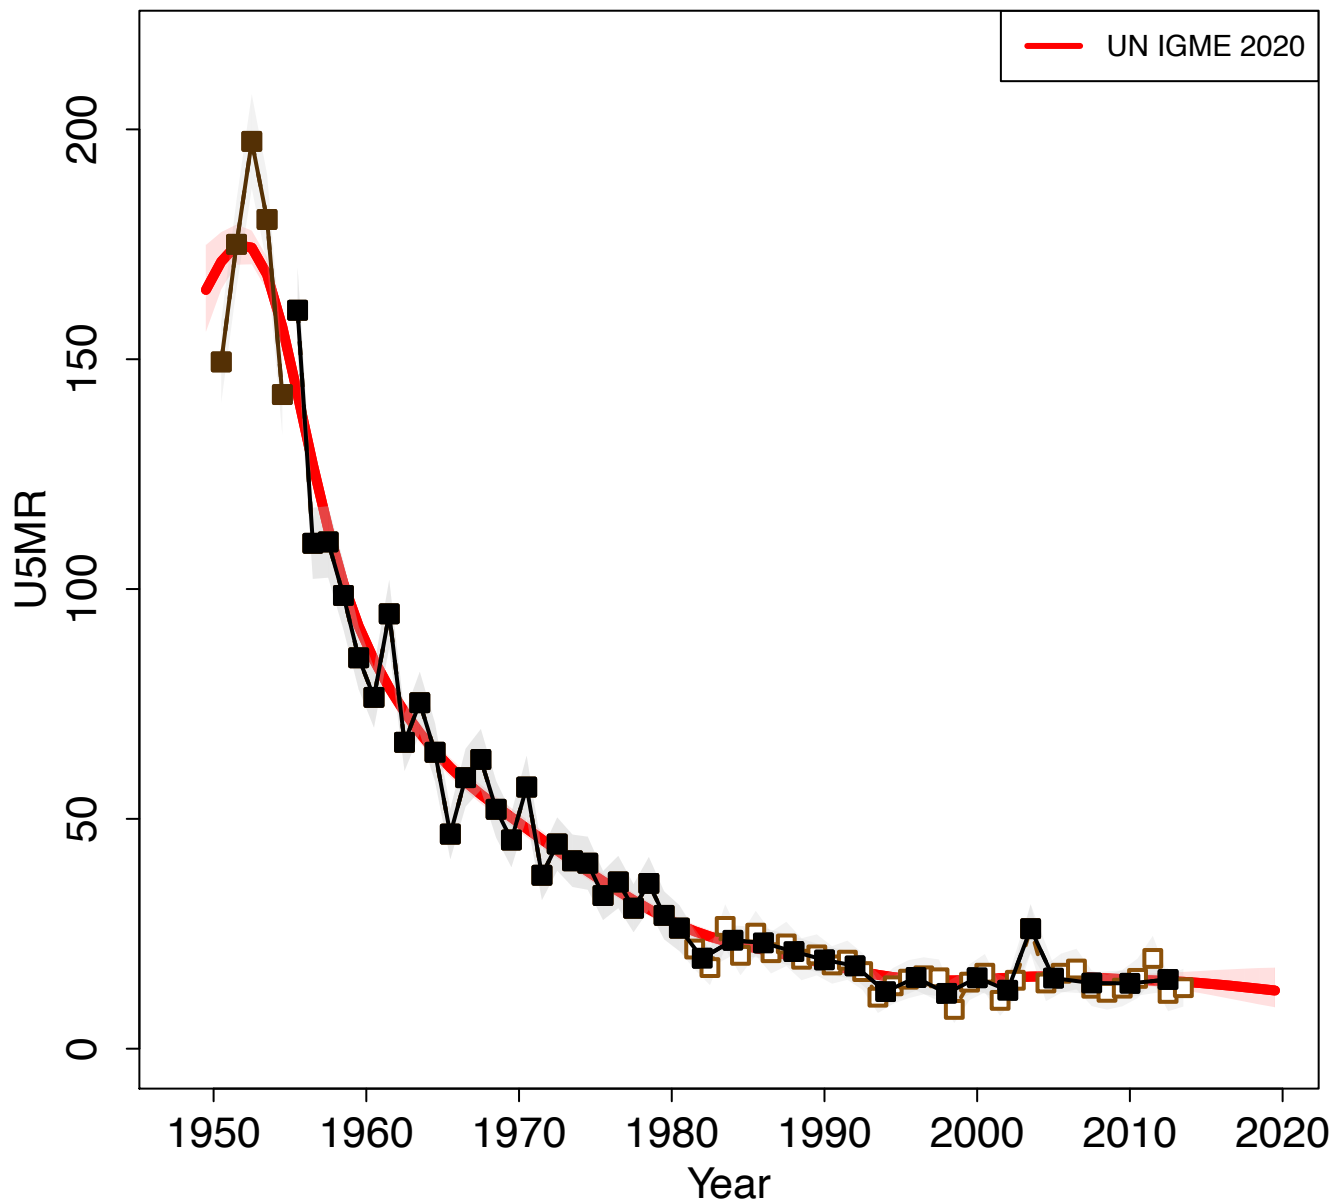

# Zoomed in

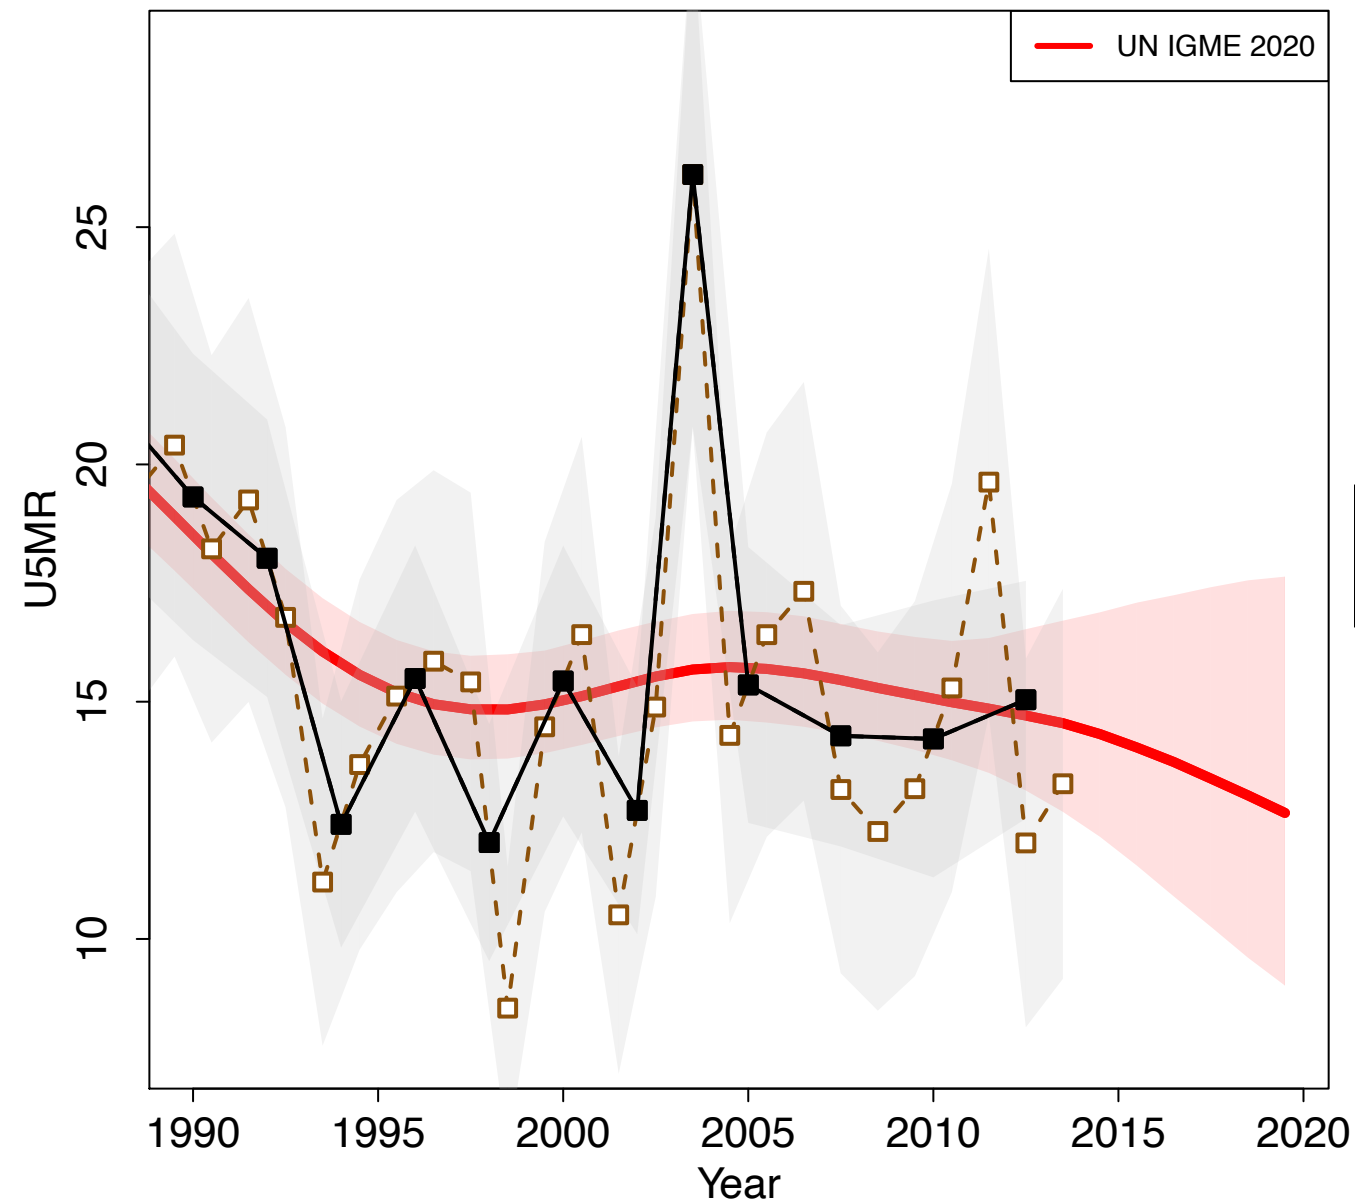



### Belarus

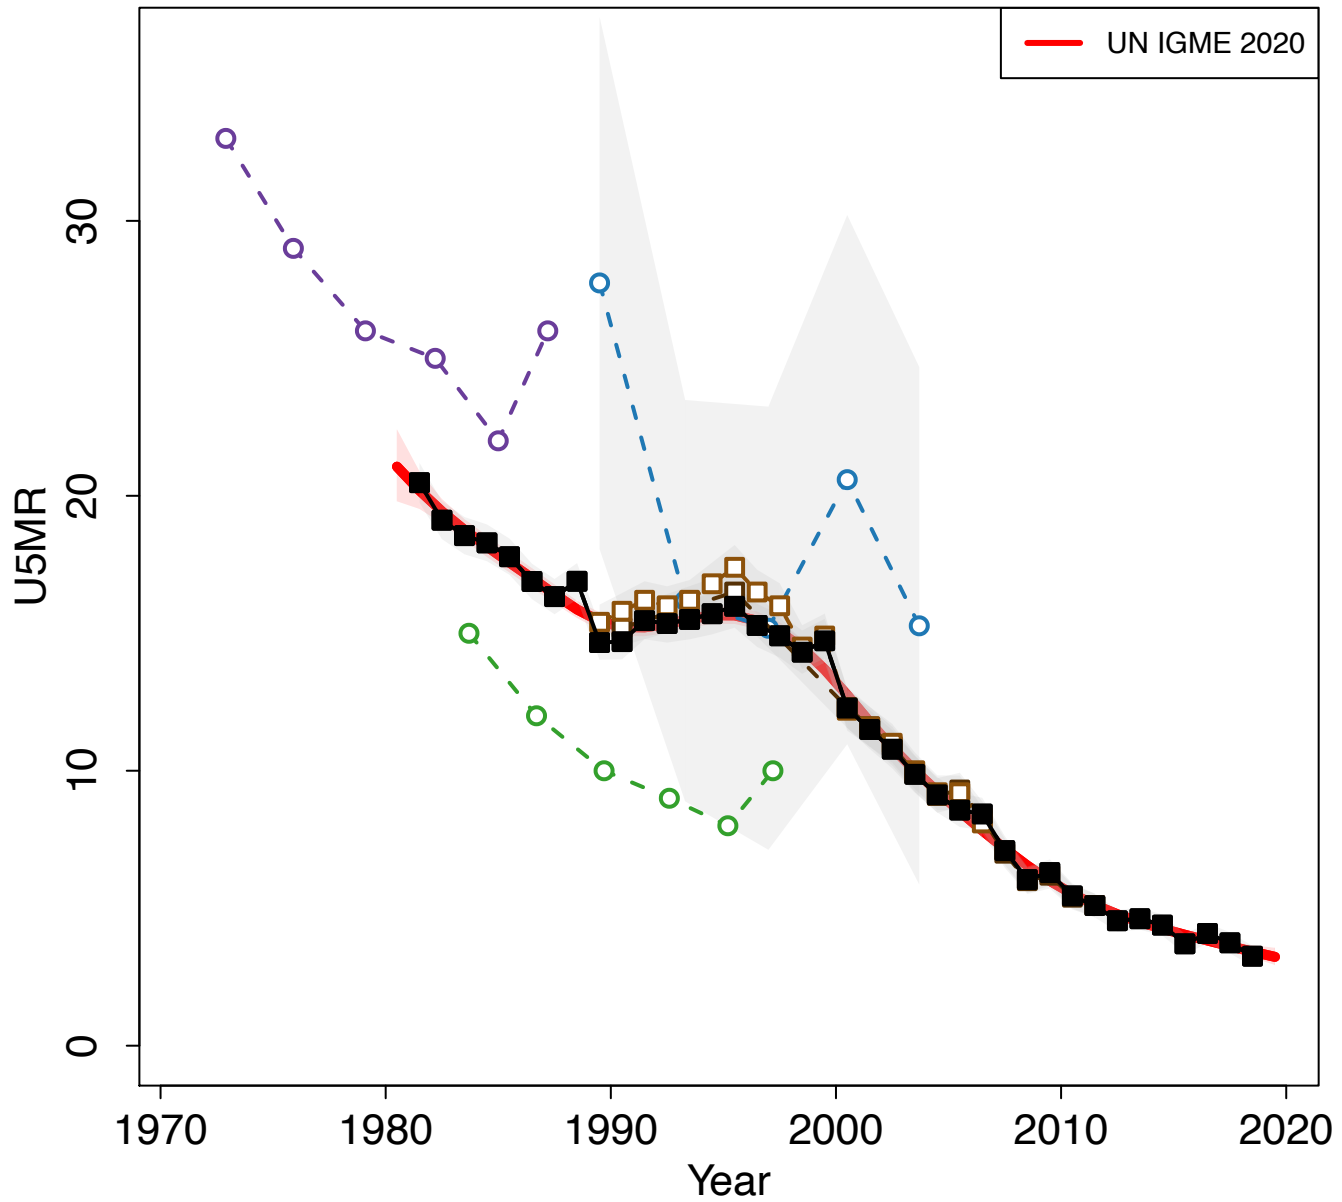

### Zoomed in

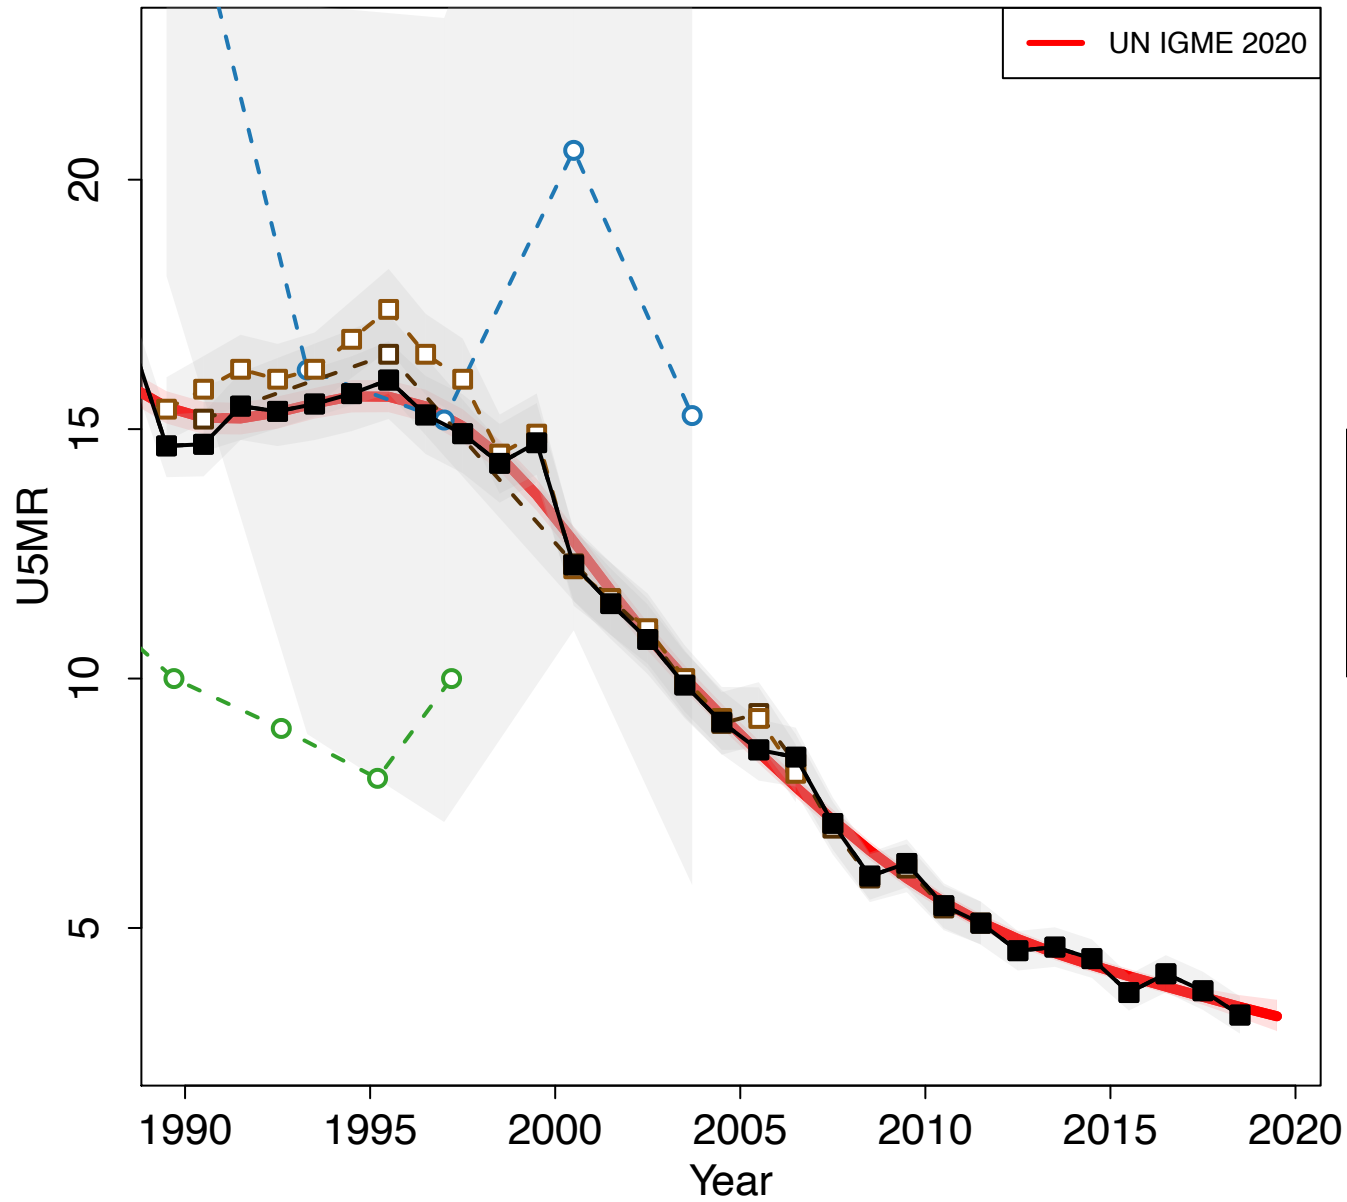

- Census 1989 (Census Indirect)
- Census 1999 (Census Indirect)
- Multiple Indicator Cluster Survey 2005 (MICS Indirect)
- VR Transmonee Vital Registration Data 2008 version
- VR Demographic Yearbook of the Republic of Belarus
- VR WHO

### Belgium

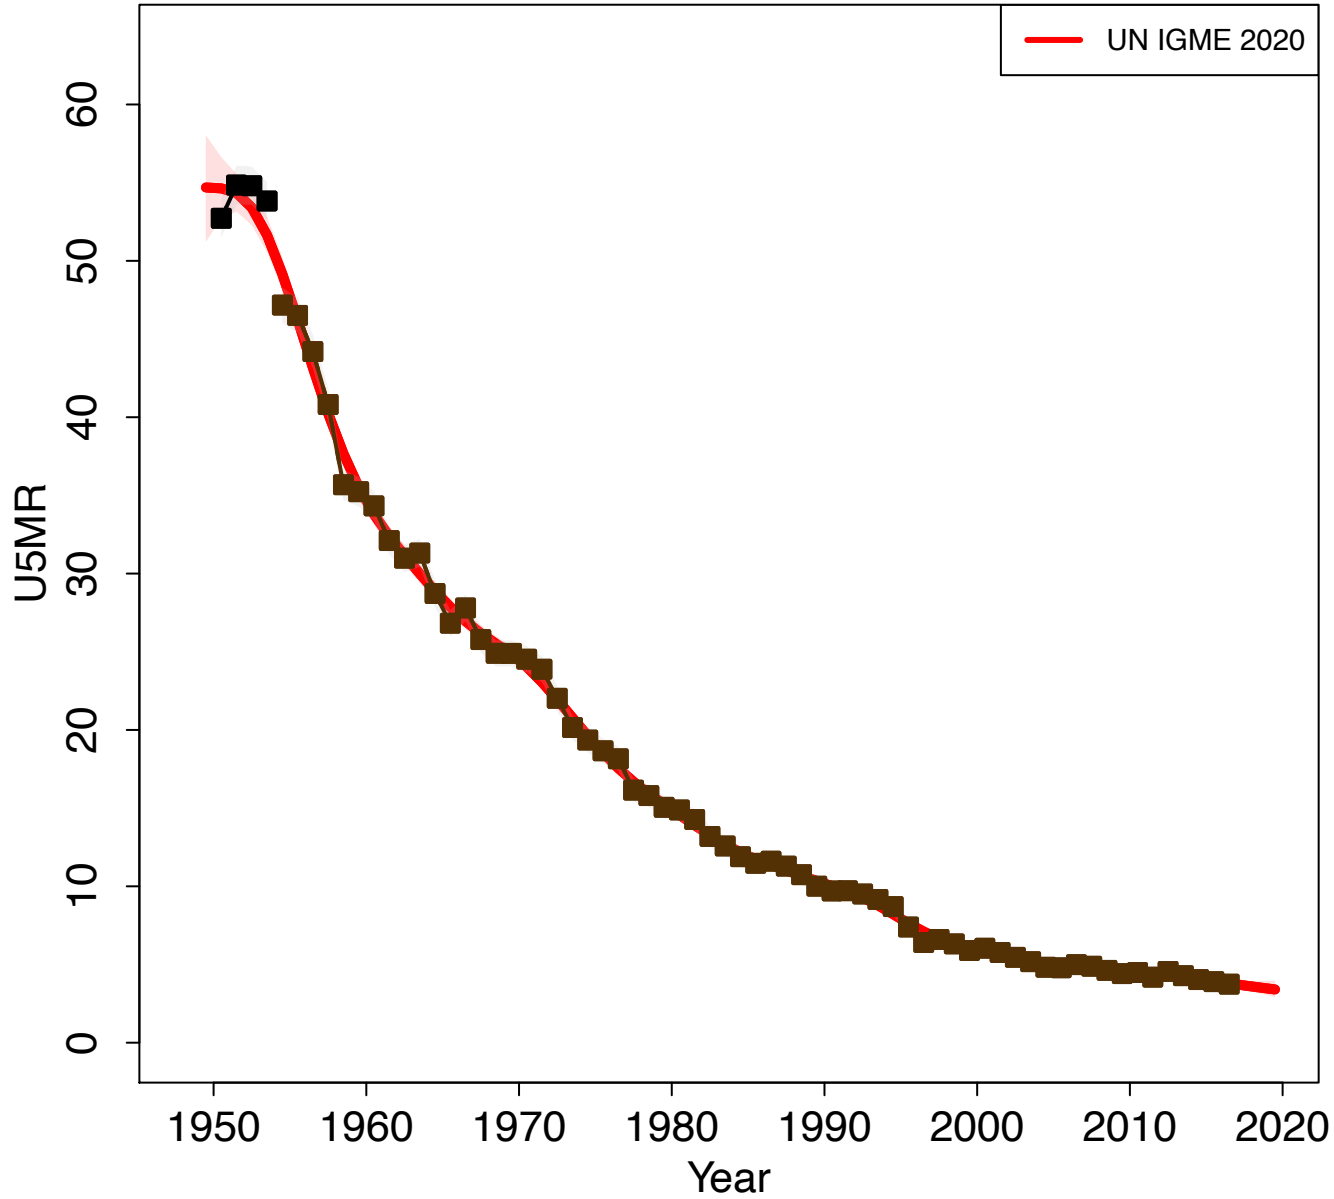

### Zoomed in

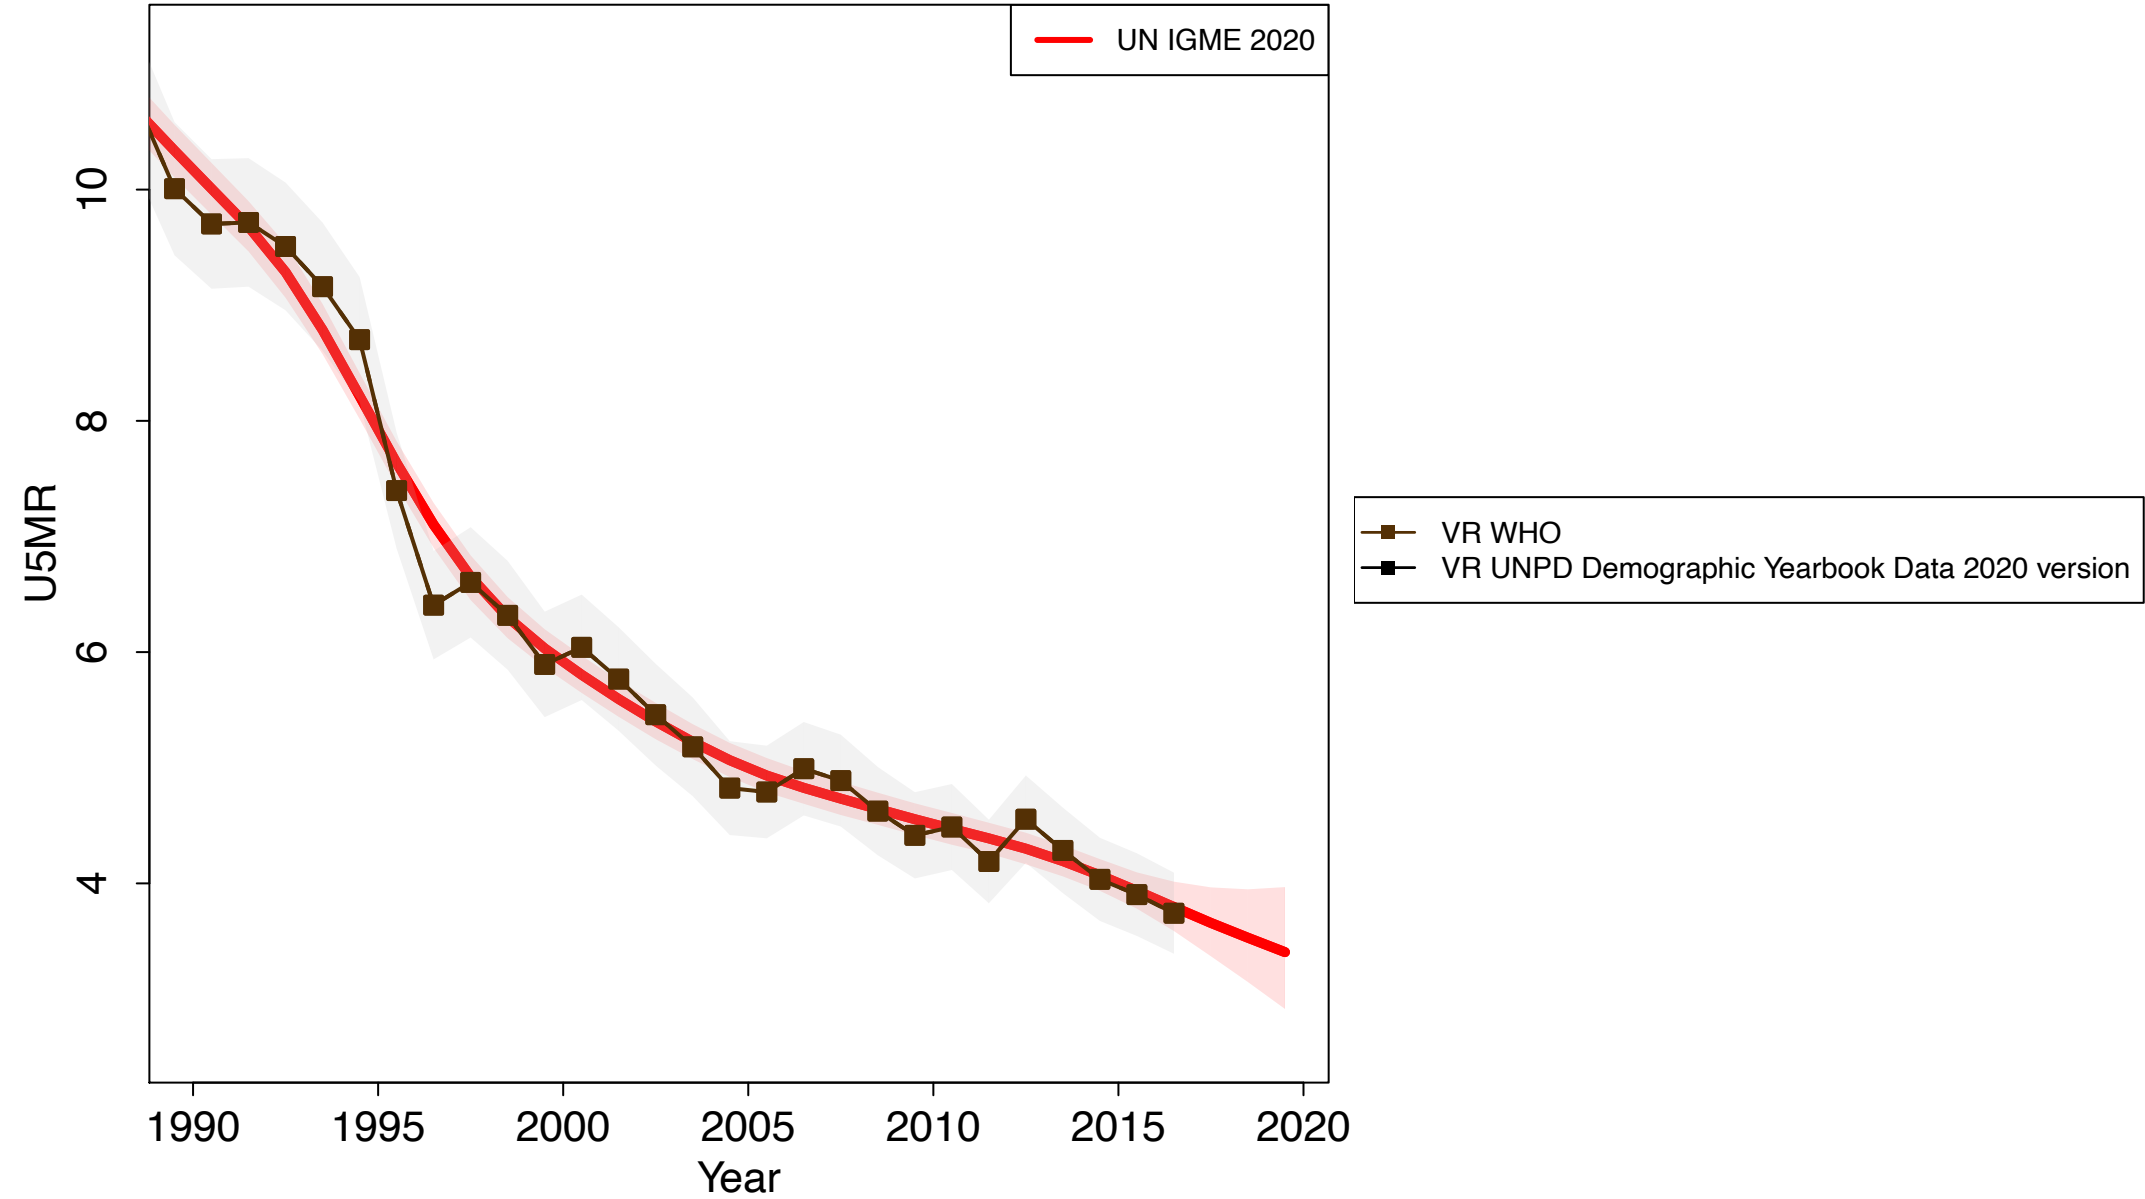

### Belize

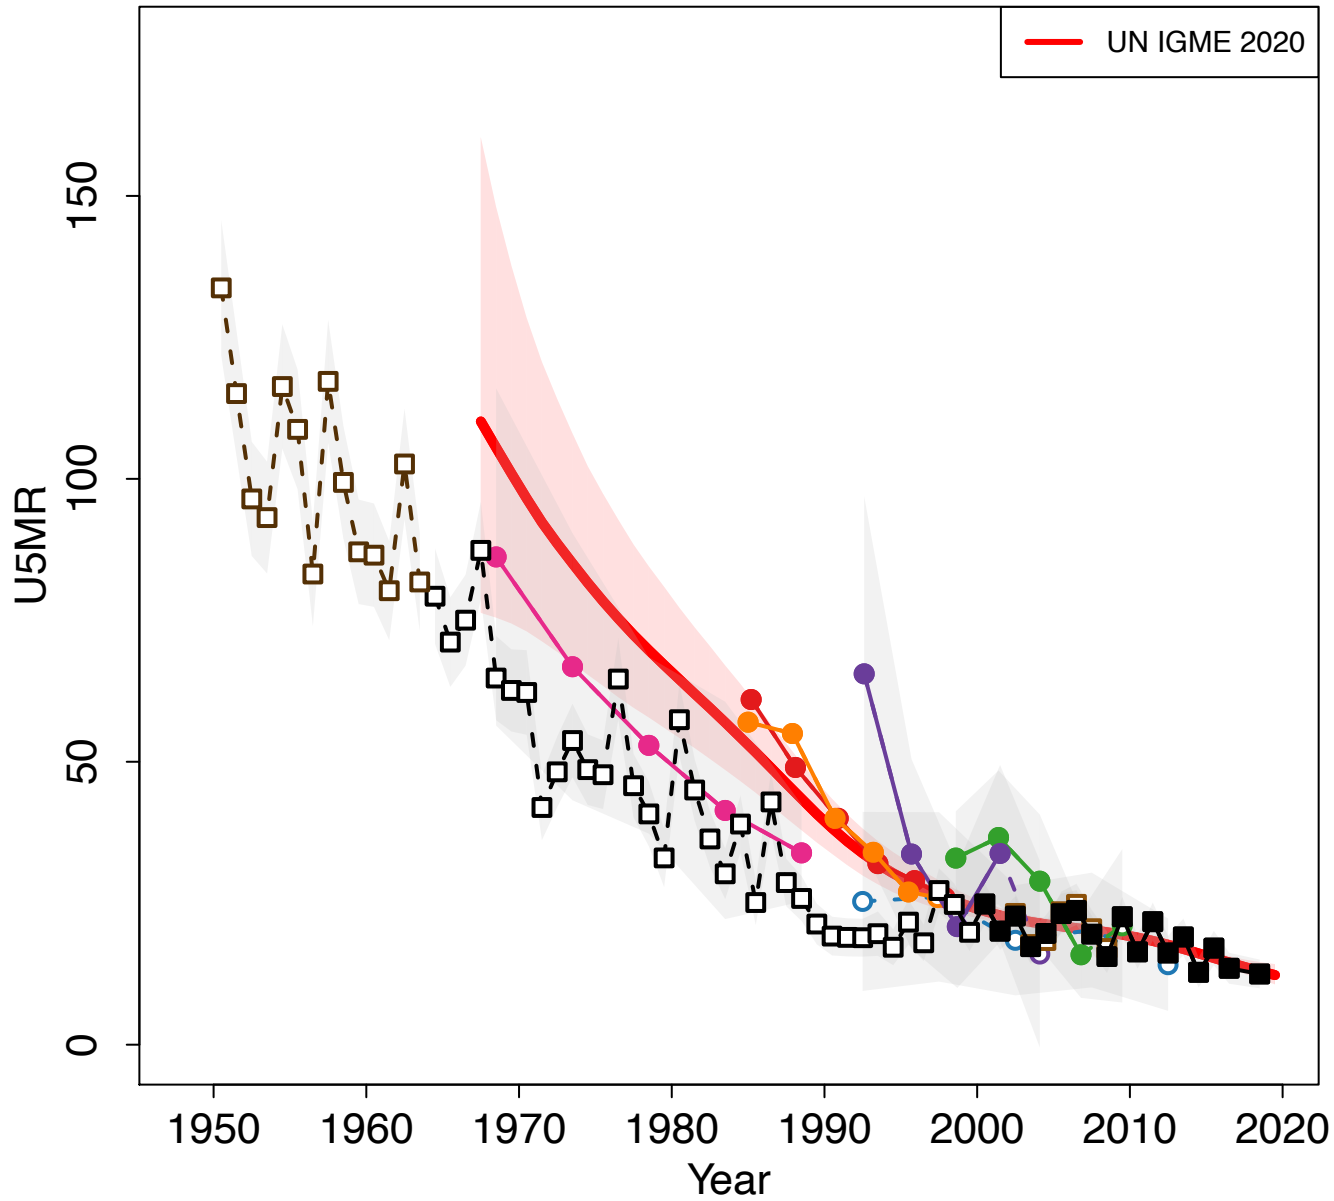

### Zoomed in

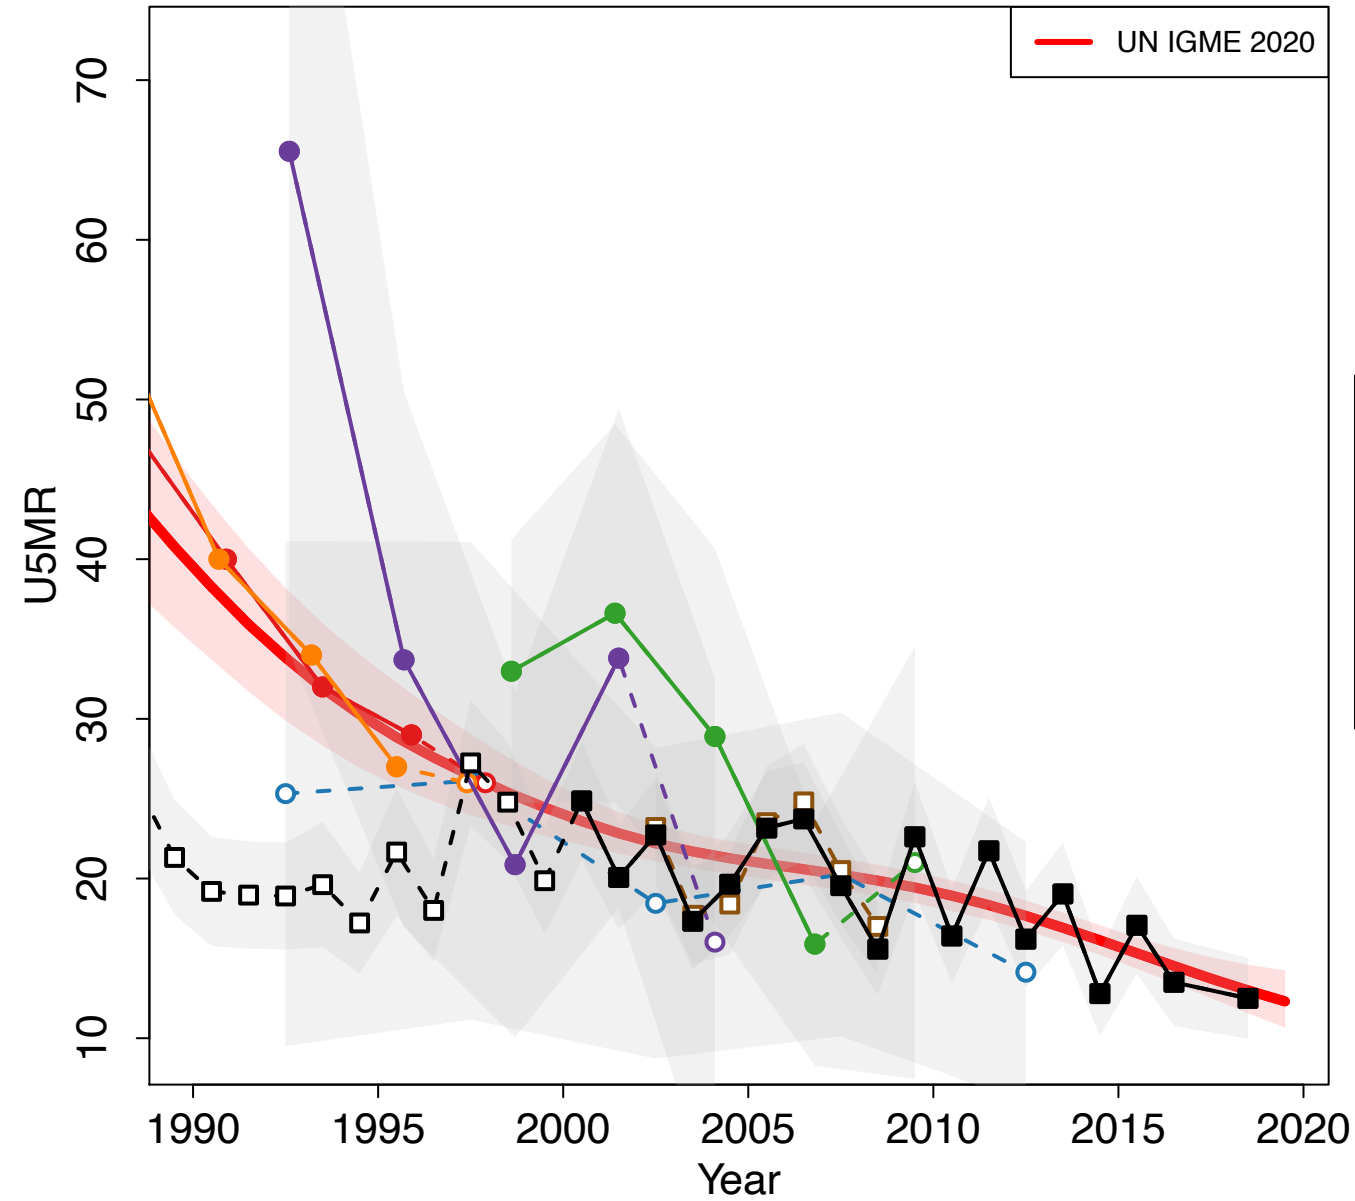

- Family Health Survey 1991 (Others Direct)
- Family Health Survey 1999 (Others Indirect)
- Census 2000 (Census Indirect)
- Multiple Indicator Cluster Survey 2006 (MICS Indirect)
- Multiple Indicator Cluster Survey 2011 (MICS Indirect)
- Multiple Indicator Cluster Survey 2015–2016 (MICS Direct)
- VR Vital Registration Data from MOH (Abstract of Statistics 2008)
- VR UNPD Demographic Yearbook Data 2020 version
- VR WHO

### Benin

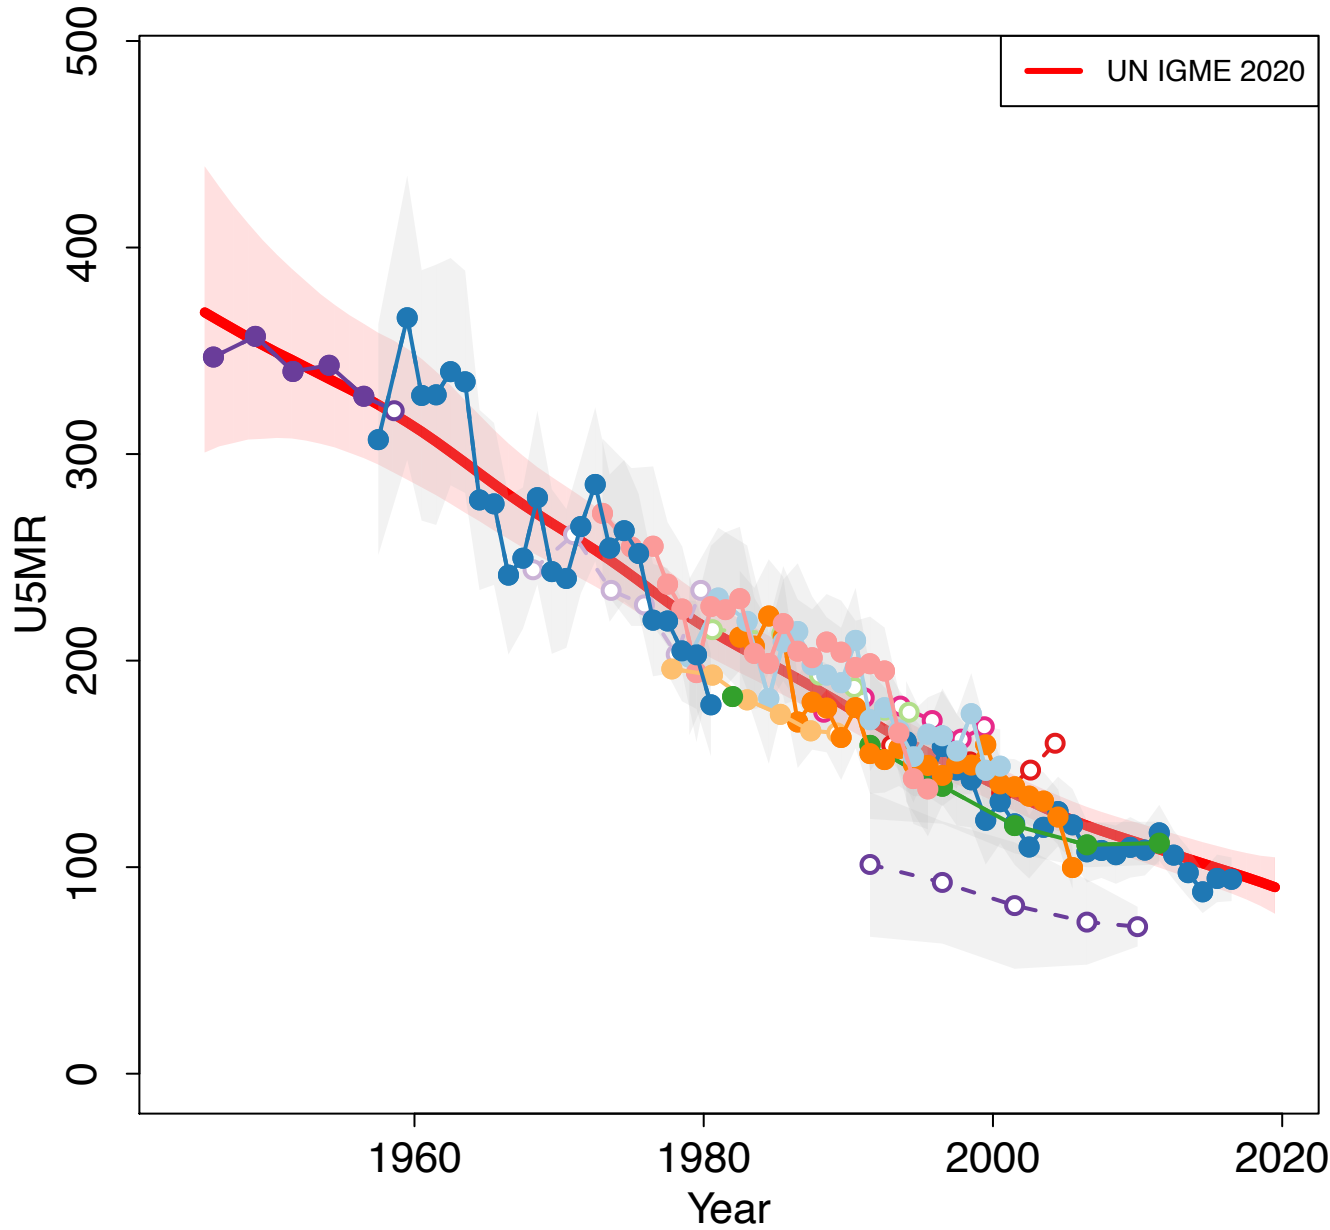

### Zoomed in

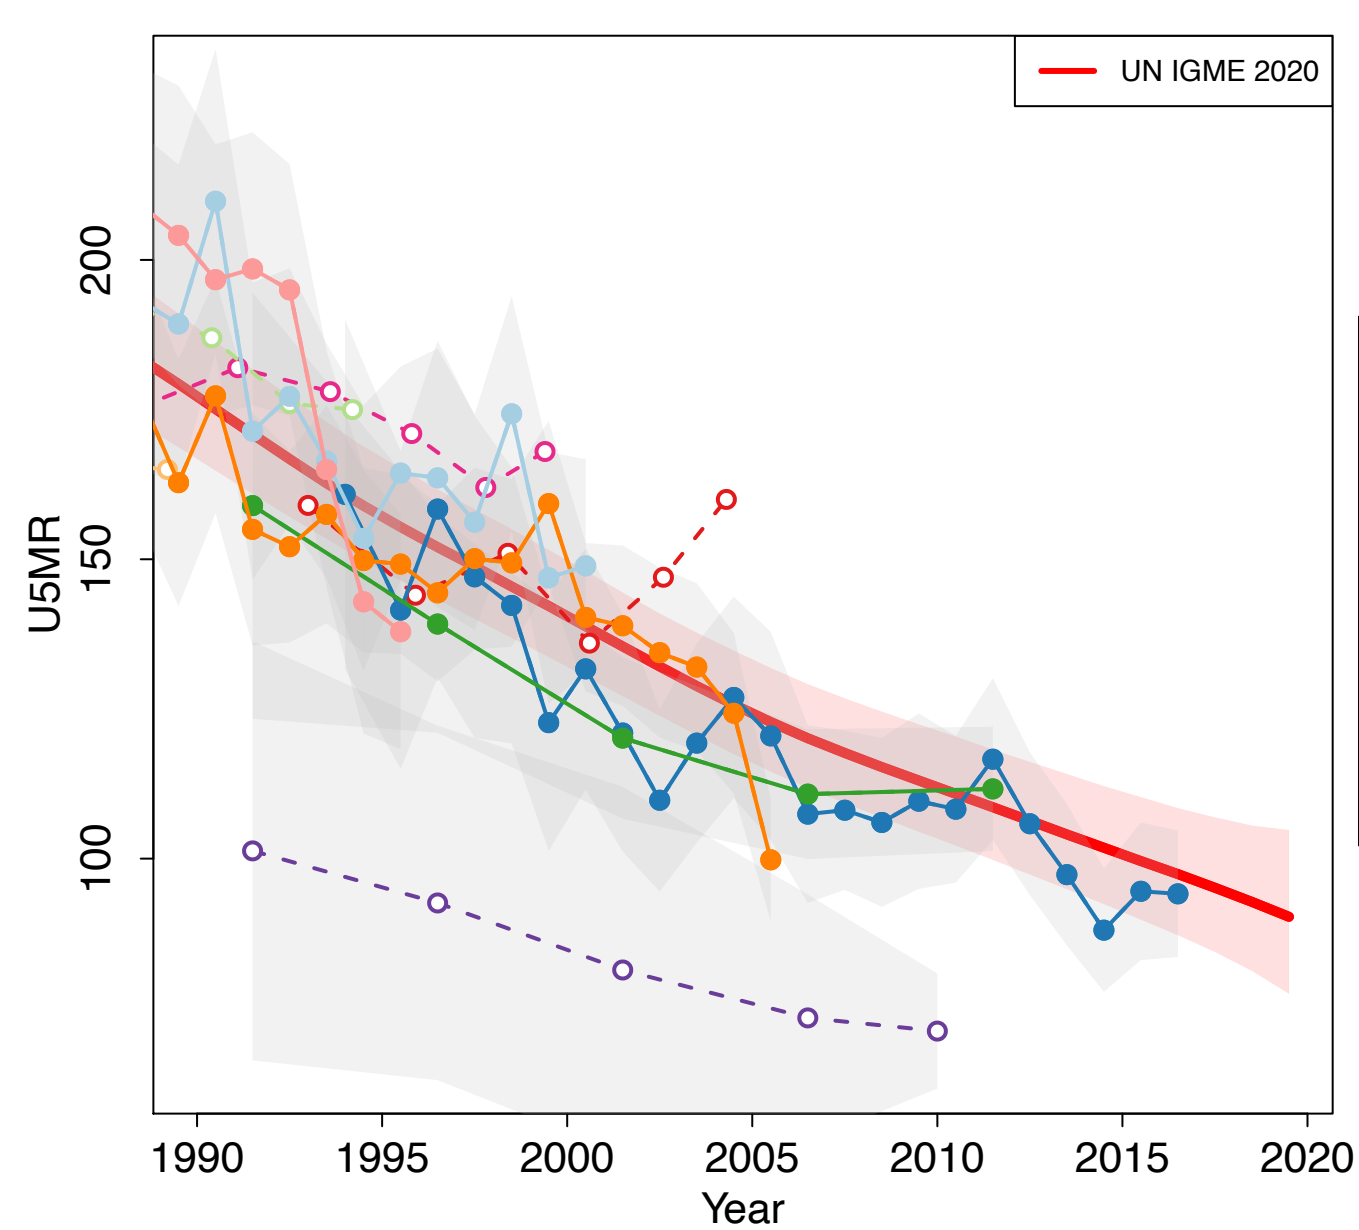

- Survey 1961 (Others Indirect)
- Enquete a passages repetes 1981–1983 (Others Household Deaths)
- World Fertility Survey 1981–1982 (Other DHS Direct)
- Benin Fertility Survey 1981–1982 (Other DHS Indirect)
- Census 1992 (Census Indirect)
- Demographic and Health Survey 1996 (DHS Direct)
- Demographic and Health Survey 1996 (DHS Indirect)
- Demographic and Health Survey 2001 (DHS Direct)
- Demographic and Health Survey 2001 (DHS Indirect)
- Demographic and Health Survey 2006 (DHS Direct)
- Demographic and Health Survey 2006 (DHS Indirect)
- Demographic and Health Survey 2011–2012 (DHS Direct)
- Multiple Indicator Cluster Survey 2014 (MICS Direct)
- Demographic and Health Survey 2017–2018 (DHS Direct)

### Bhutan

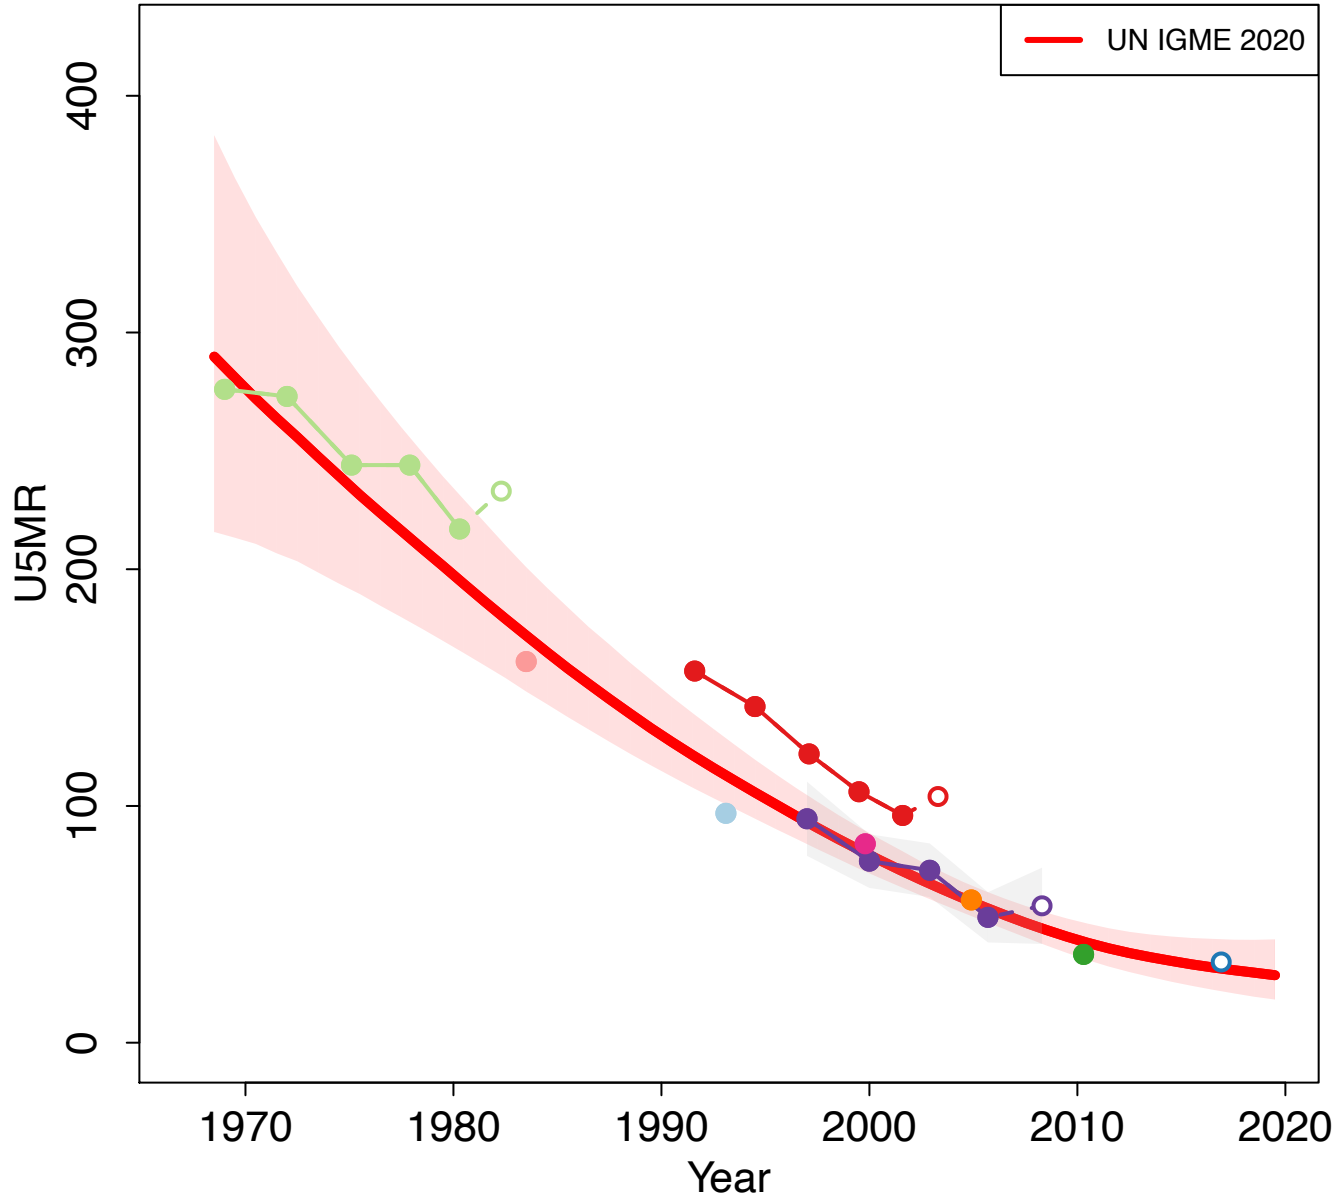

### Zoomed in

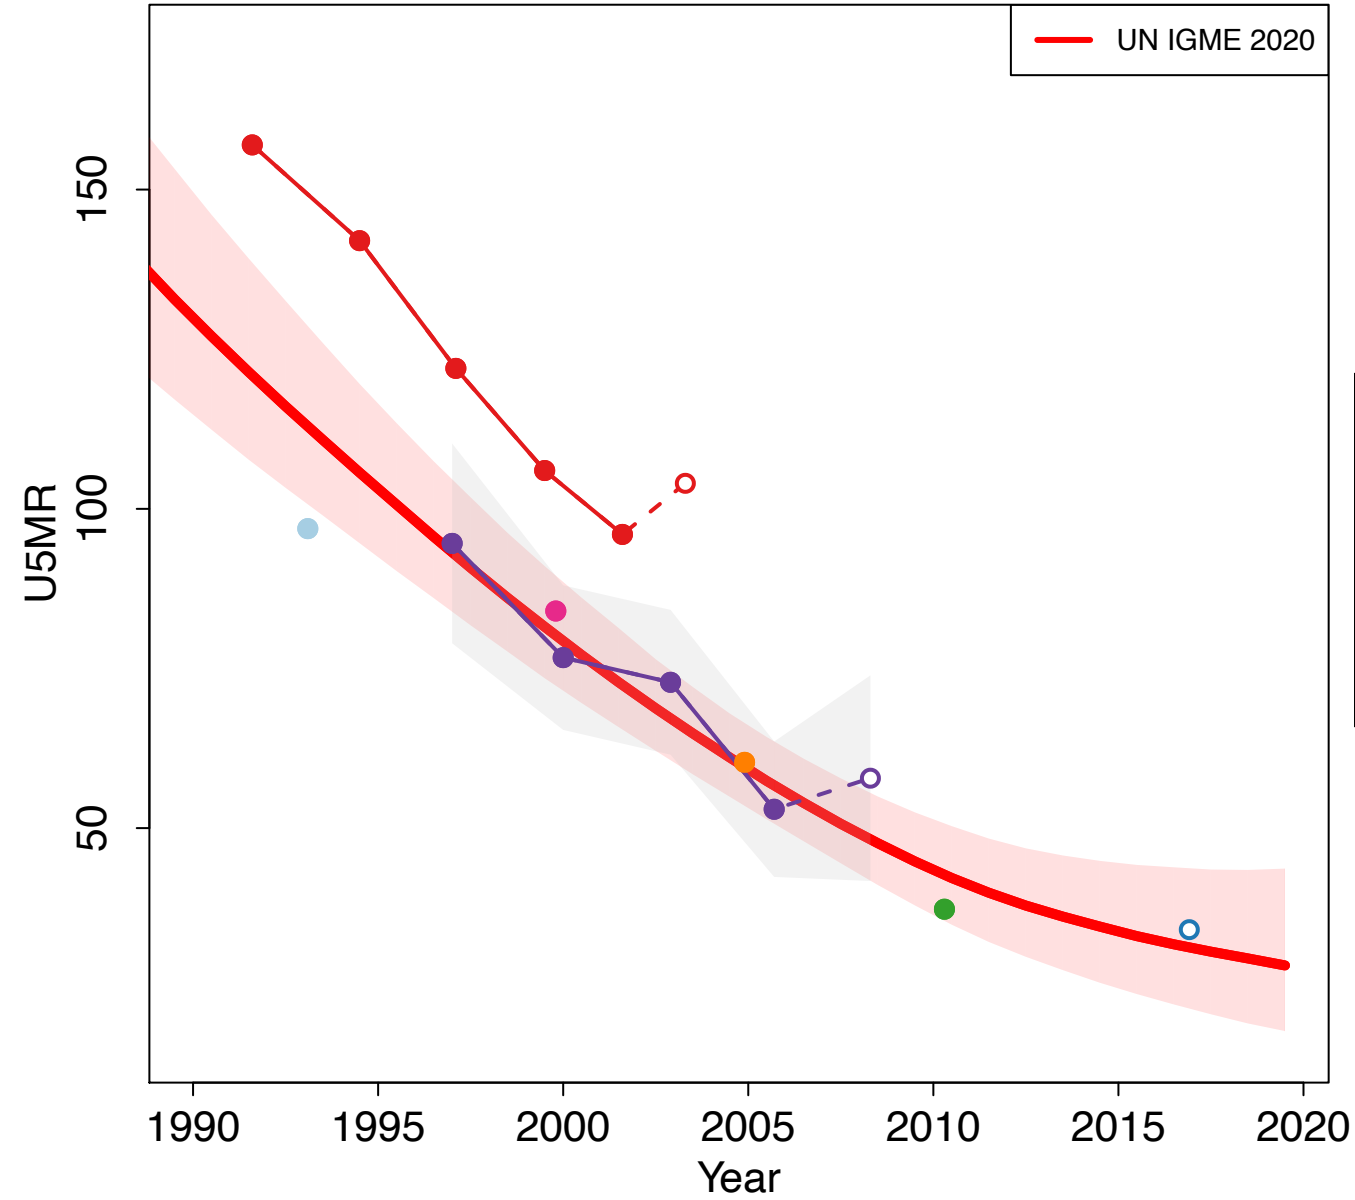

- Demographic Sample Survey 1984 (Others Direct)
- Demographic Sample Survey 1984 (Others Indirect)
- National Health Survey 1994 (Others Household Deaths)
- National Health Survey 2000 (Others Direct)
- Census 2005 (Others Household Deaths)
- Census 2005 (Census Indirect)
- Multiple Indicator Cluster Survey 2010 (MICS Indirect)
- National Health Survey 2012 (Others Direct)
- Census 2017 (Others Household Deaths)

### Bolivia (Plurinational State of)

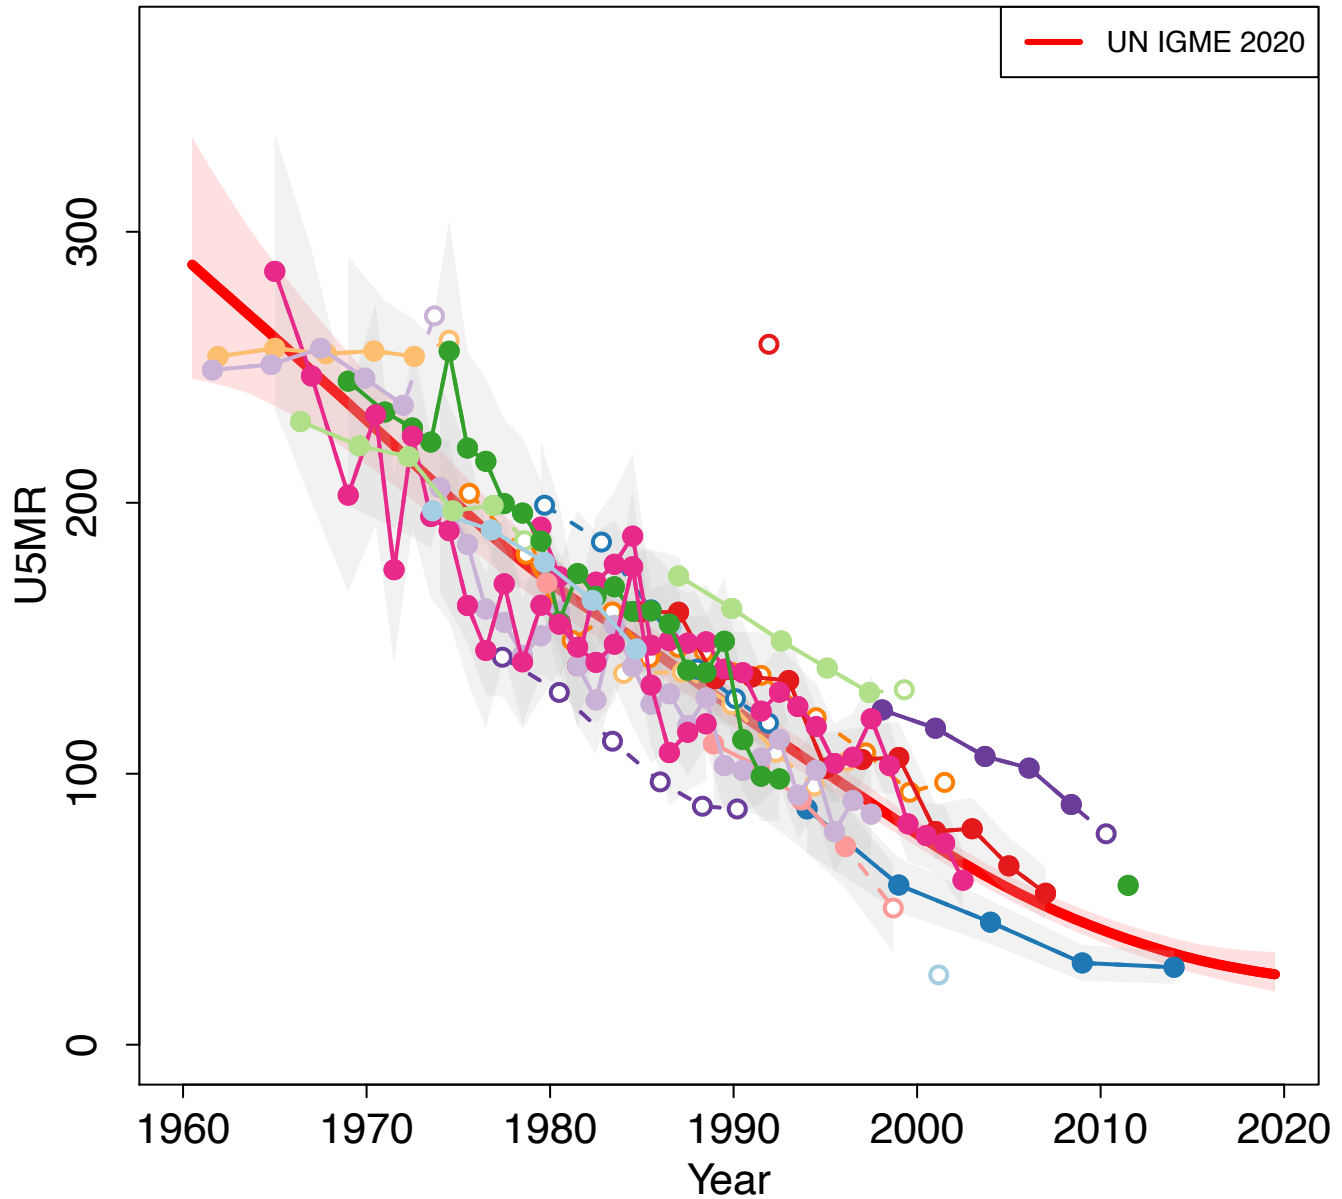

### Zoomed in

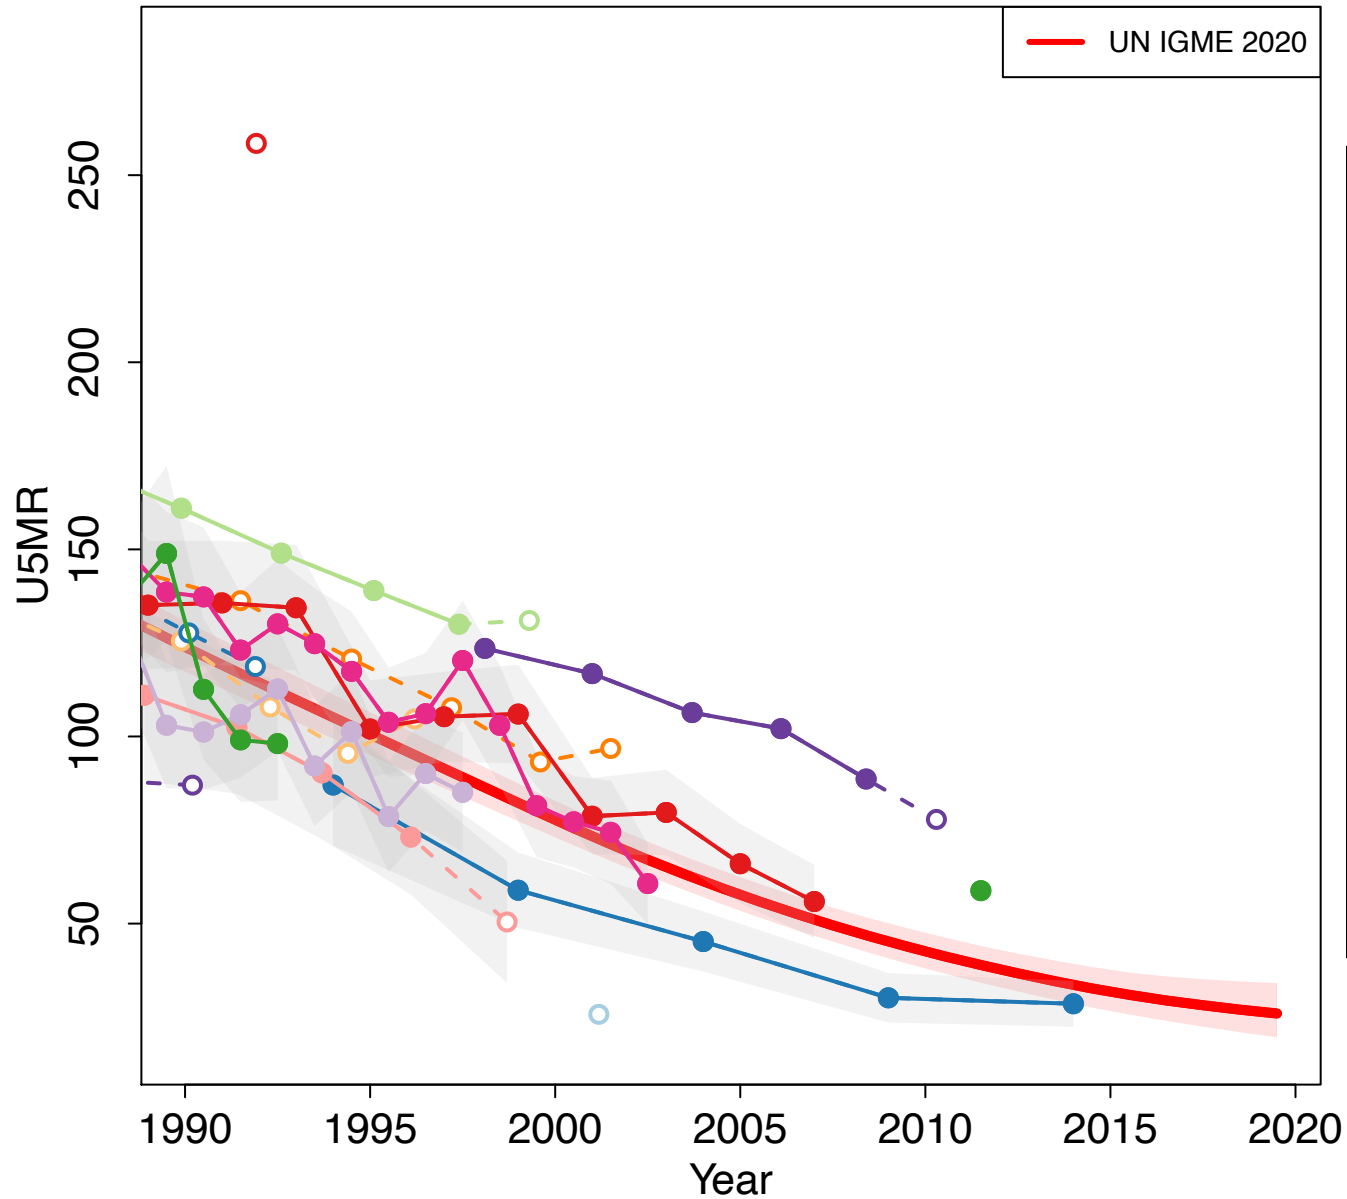

- EDEN 1975 (Others Indirect)
- Census 1976 (Census Indirect)
- National Demographic Survey 1980 (Others Household Deaths)
- National Demographic Survey 1980 (Others Indirect)
- ENPV 1988 (Others Indirect)
- Demographic and Health Survey 1989 (DHS Direct)
- Demographic and Health Survey 1989 (DHS Indirect)
- Census 1992 (Others Household Deaths)
- Census 1992 (Census Indirect)
- Demographic and Health Survey 1993–1994 (DHS Direct)
- Demographic and Health Survey 1993–1994 (DHS Indirect)
- Demographic and Health Survey 1998 (DHS Direct)
- Demographic and Health Survey 1998 (DHS Indirect)
- Multiple Indicator Cluster Survey 2000 (MICS Indirect)
- Census 2001 (Census Indirect)
- Census 2001 (Others Household Deaths)
- Demographic and Health Survey 2003 (DHS Direct)
- Demographic and Health Survey 2003 (DHS Indirect)
- Demographic and Health Survey 2008 (DHS Direct)
- Census 2012 (Census Indirect)
- Census 2012 (Others Household Deaths)
- Demographic and Health Survey 2016 (Other DHS Direct)

### Bosnia and Herzegovina

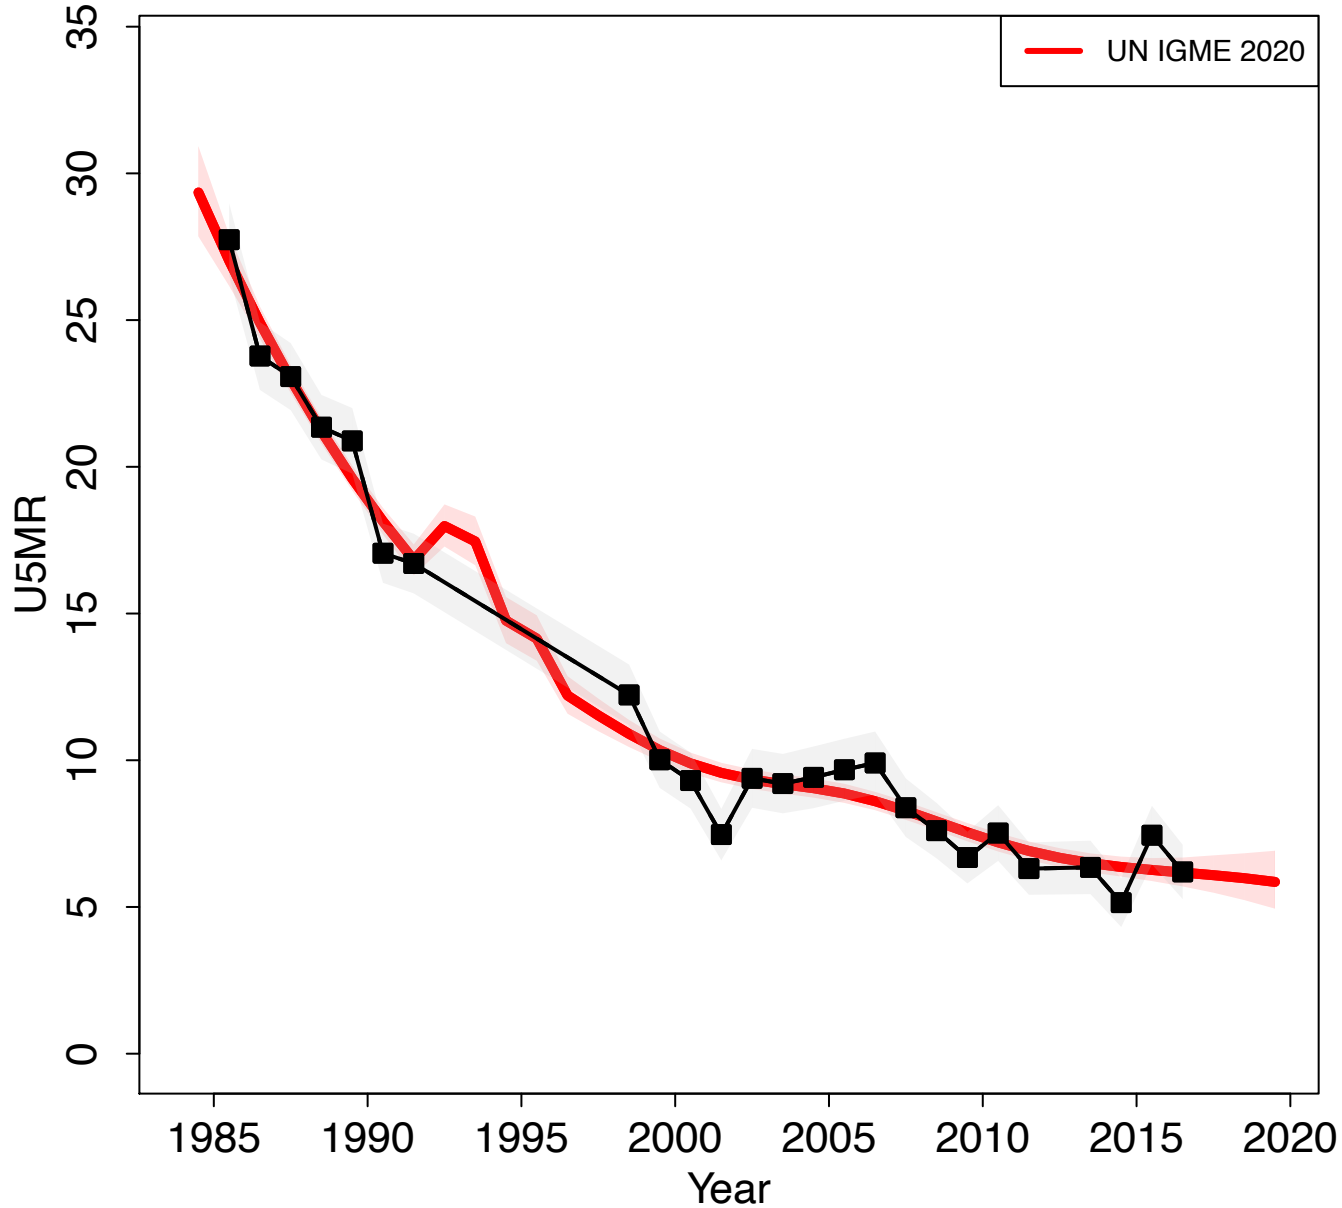

### Zoomed in

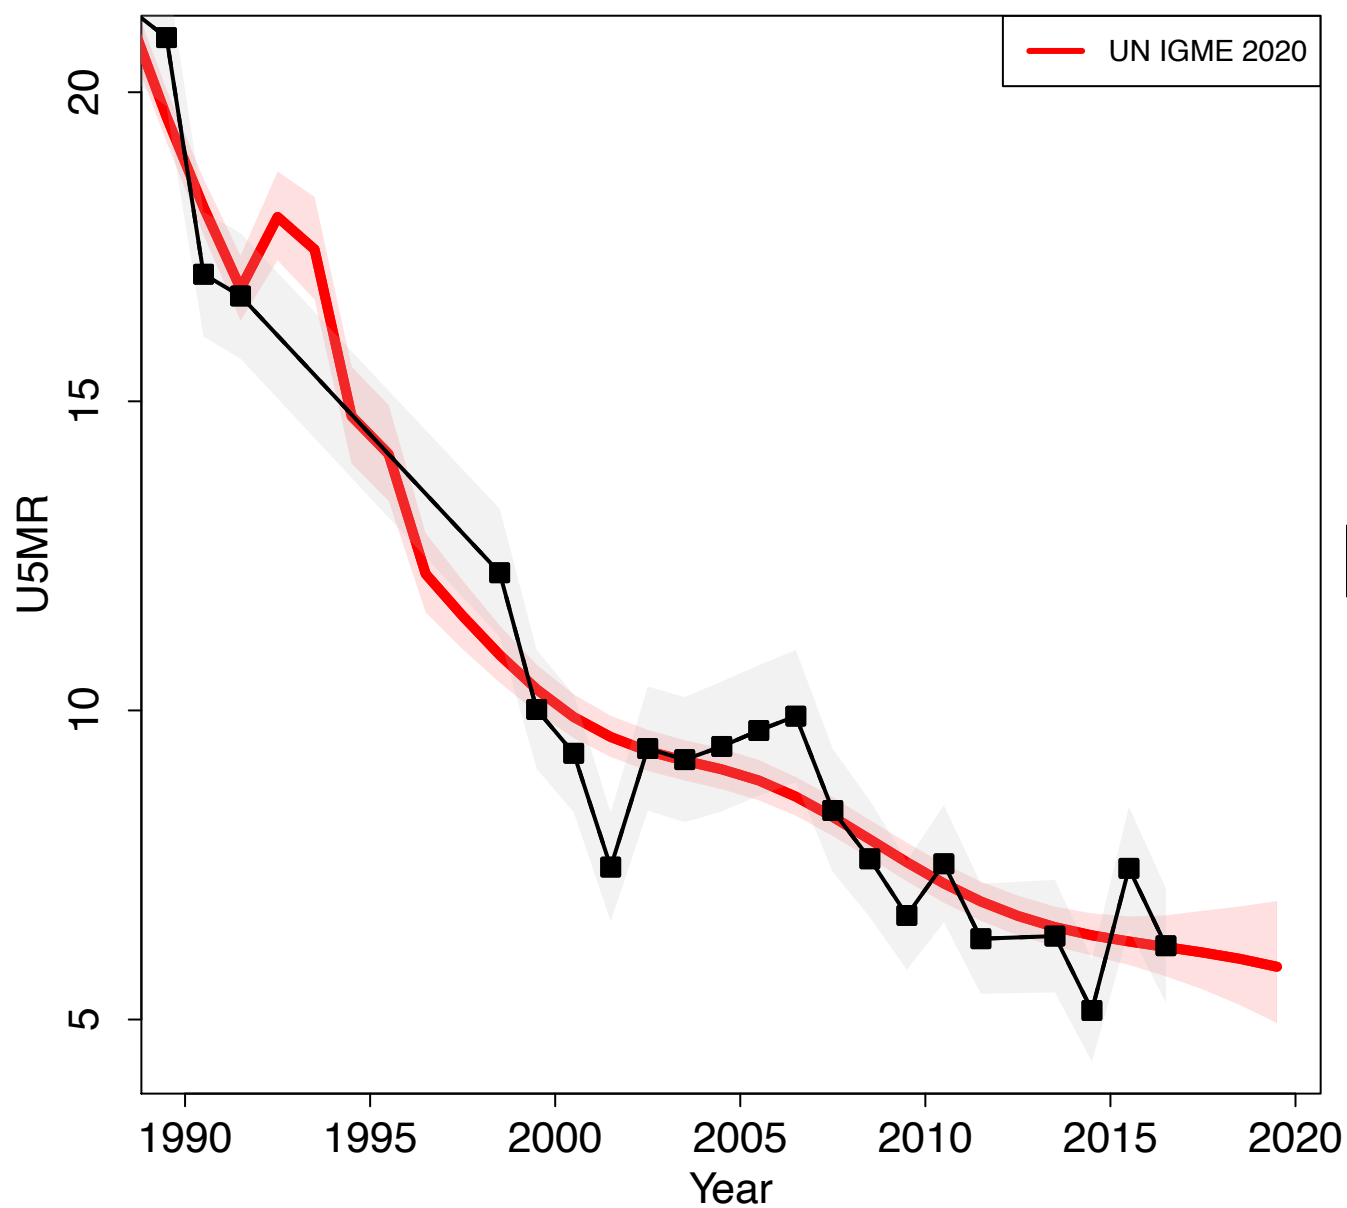

# Botswana

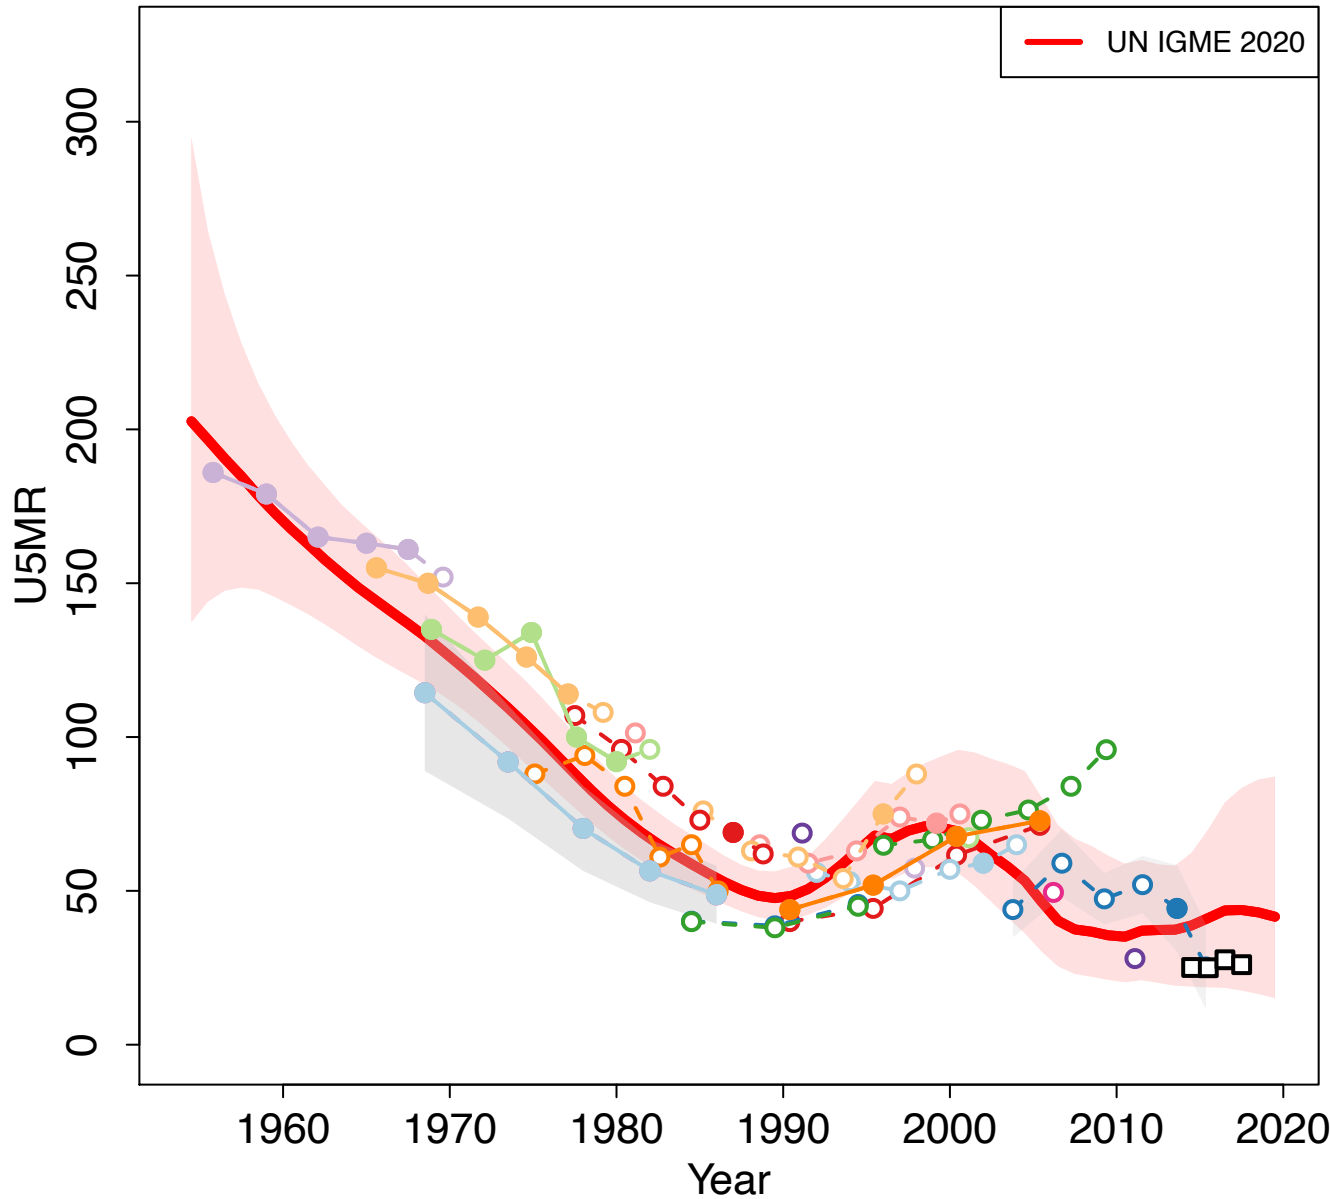

# Zoomed in

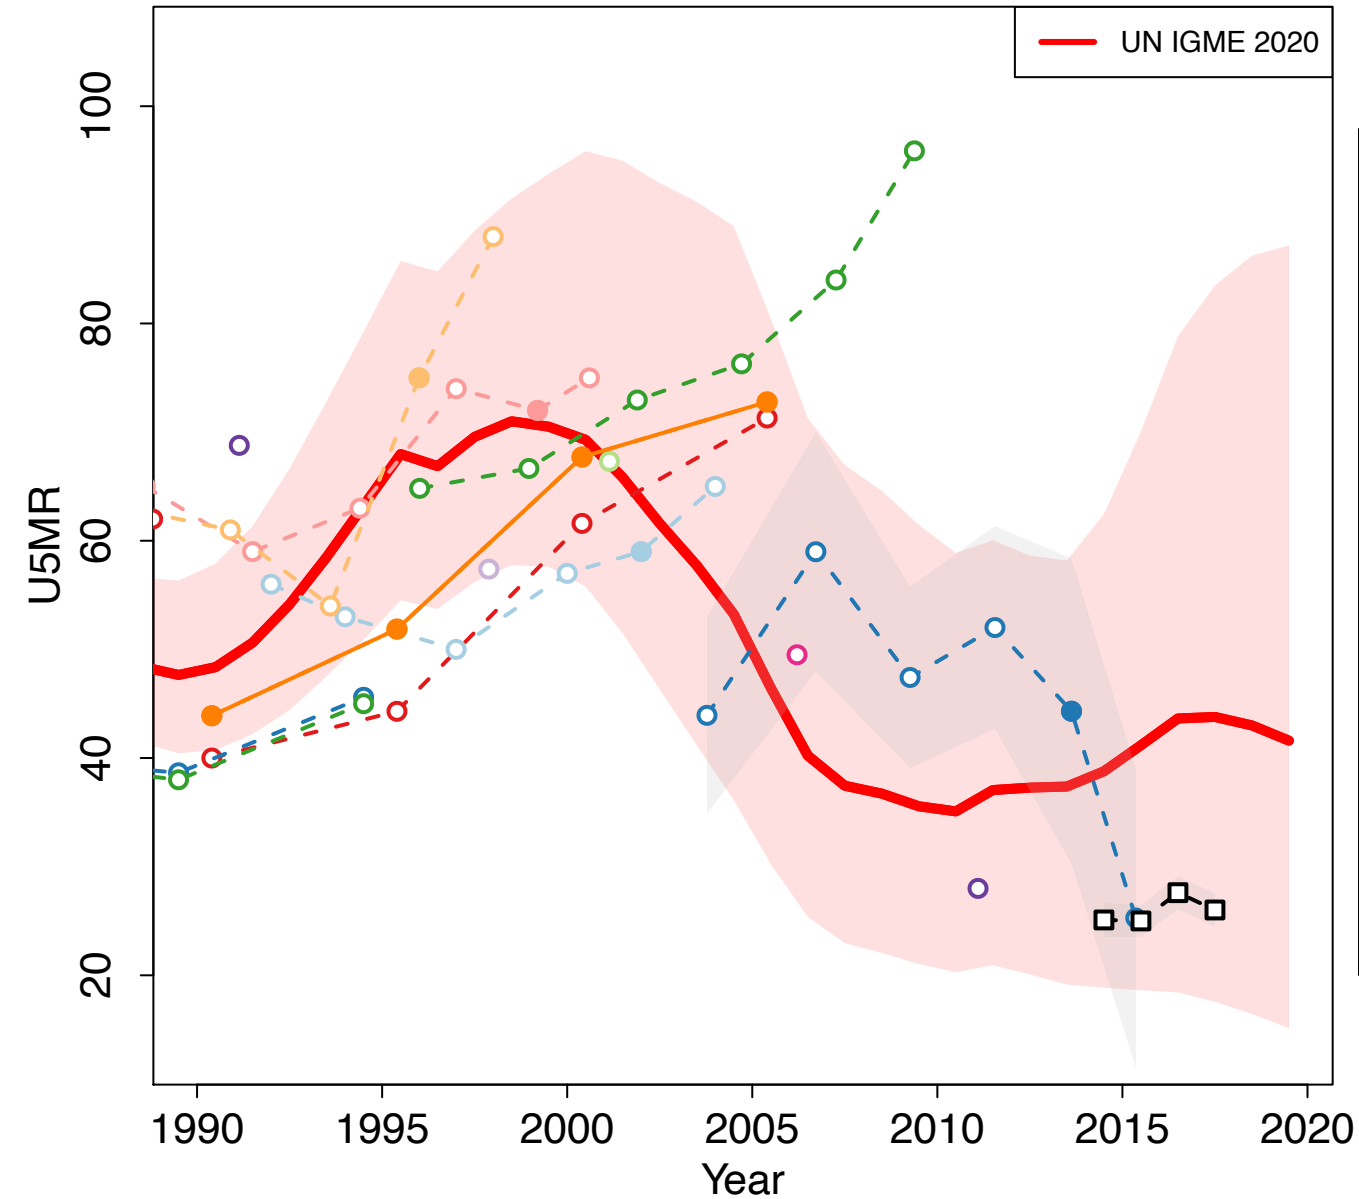

- Census 1971 (Census Indirect)
- Census 1981 (Census Indirect)
- Census 1981 (Others Household Deaths)
- Family Health Survey 1984 (Others Indirect)
- Family Health Survey (MM adjusted) 1988 (DHS Direct)
- Family Health Survey 1988 (DHS Direct)
- Family Health Survey 1988 (DHS Indirect)
- Census 1991 (Census Indirect)
- Census 1991 (Others Household Deaths)
- Family Health Survey 1996 (Others Direct)
- Family Health Survey (MM adjusted) 1996 (Others Direct)
- Demographic Survey 1998 (Others Household Deaths)
- Multiple Indicator Cluster Survey 2000 (Others Indirect)
- Census 2001 (Census Indirect)
- Census 2001 (Others Household Deaths)
- Demographic Survey 2006 (Others Indirect)
- Demographic Survey 2006 (Others Household Deaths)
- Family Health Survey (MM adjusted) 2007–2008 (Others Direct)
- Family Health Survey 2007–2008 (Others Direct)
- Census 2011 (Others Household Deaths)
- Census 2011 (Census Indirect)
- Demographic Survey 2017 (Others Indirect)
- VR Vital Statistics Report from Statistics Botswana



### Brazil

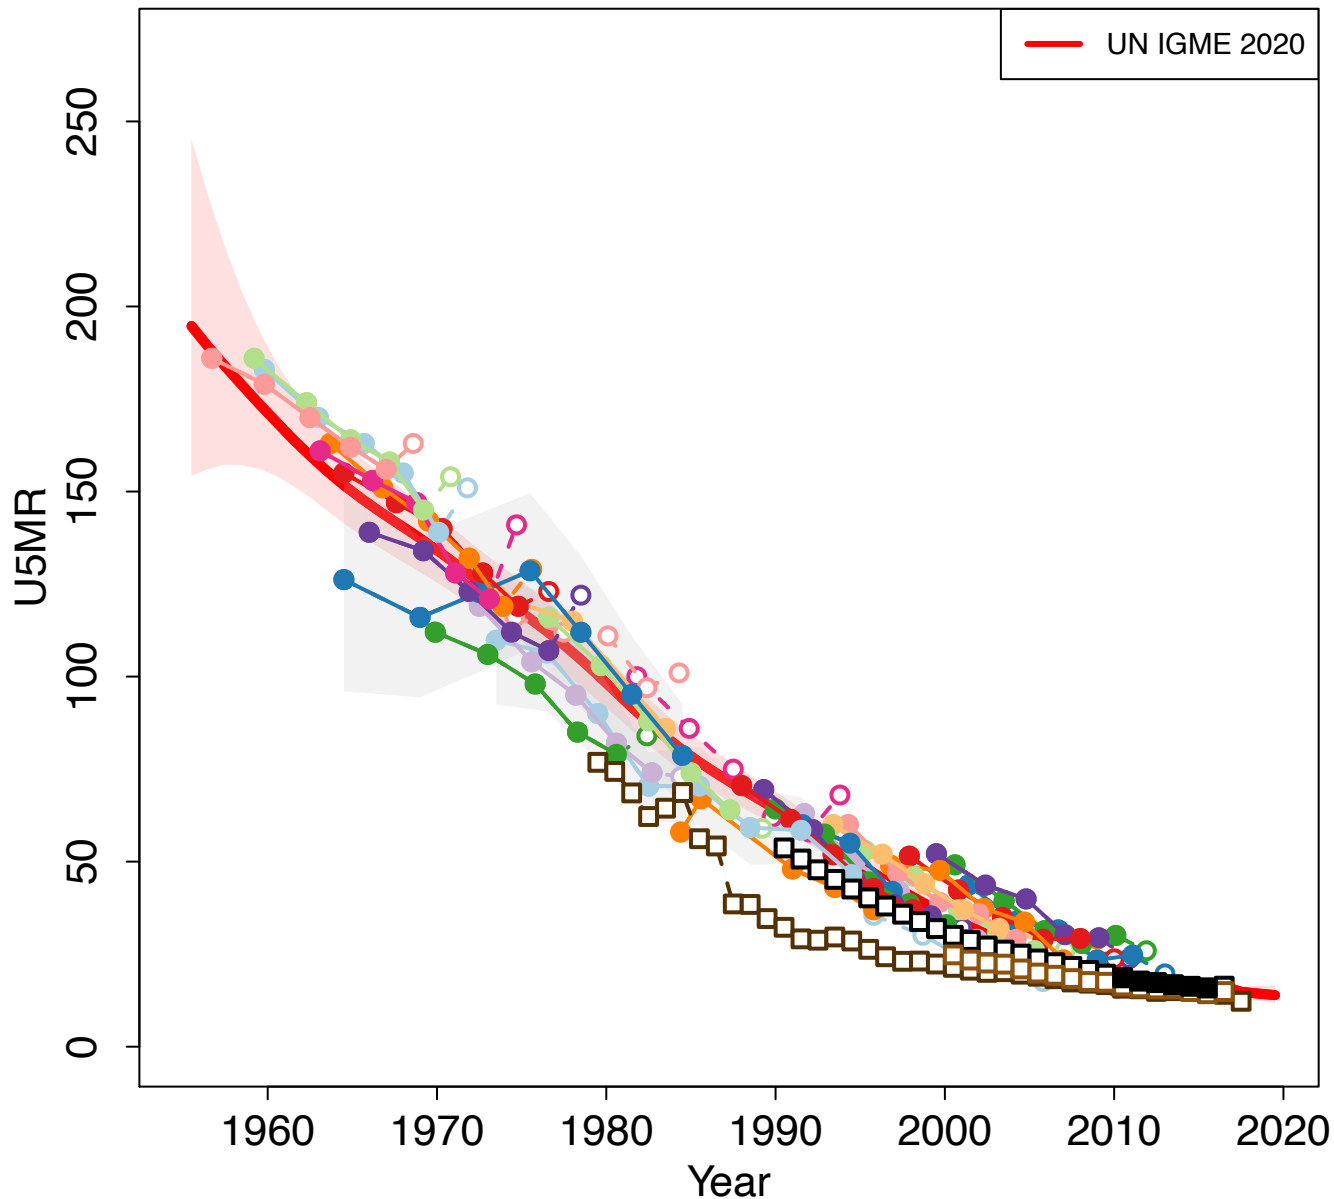

### Zoomed in

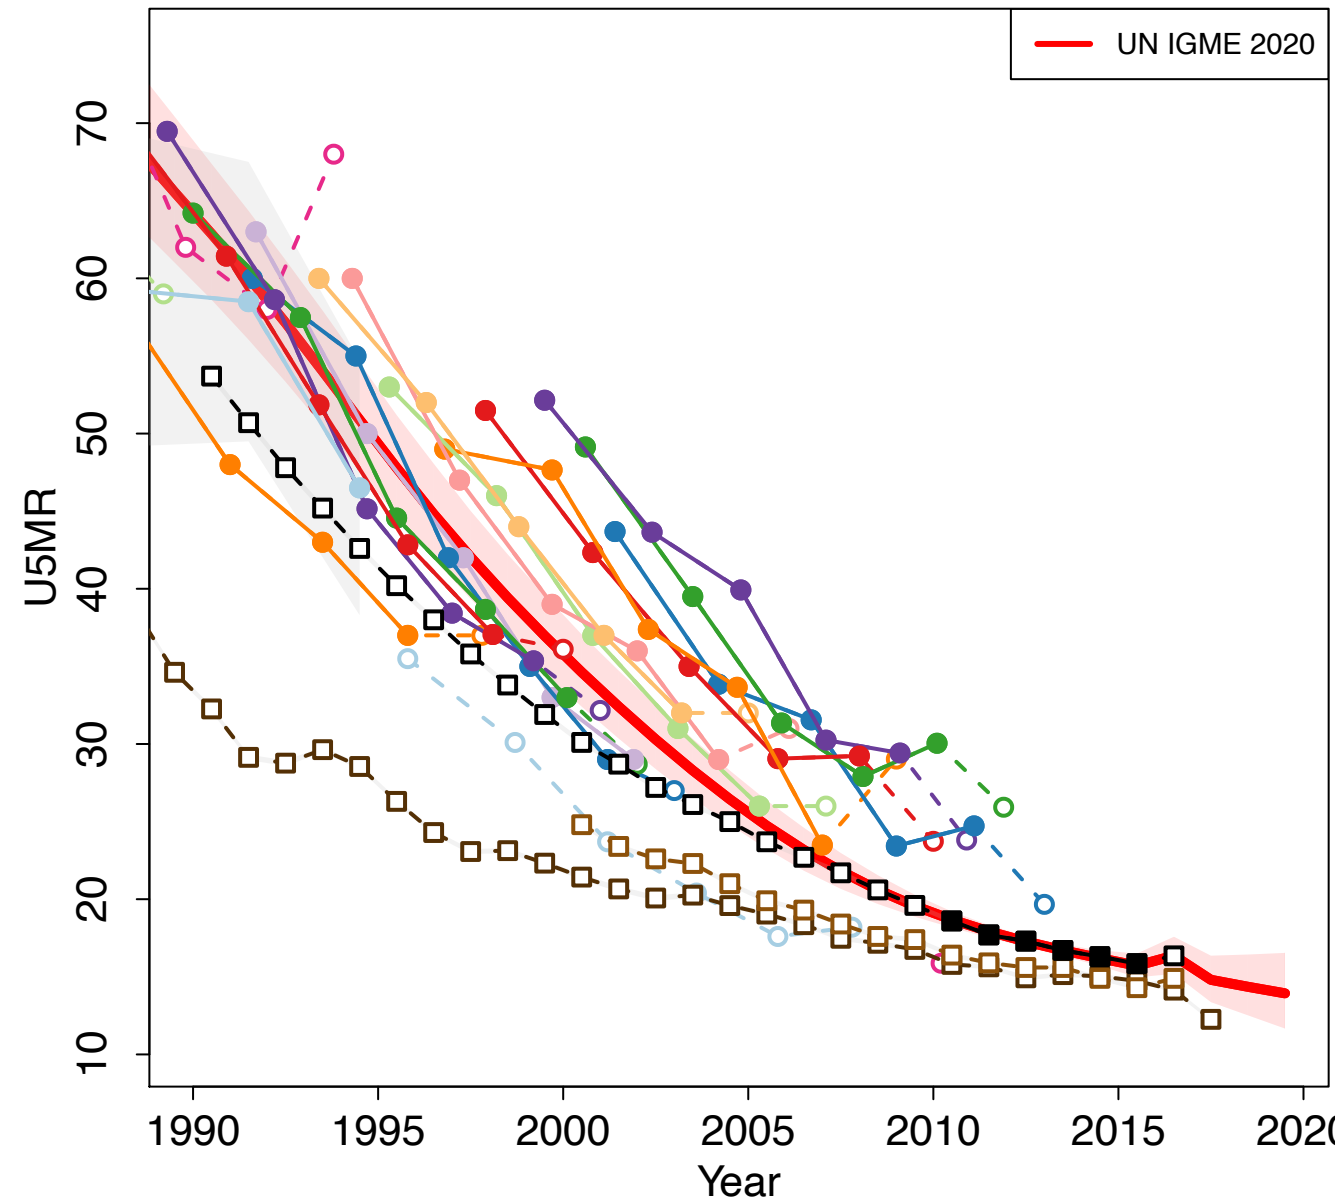

- Census 1970 (Census Indirect)
- National Health Survey 1972 (Others Indirect)
- National Health Survey 1973 (Others Indirect)
- National Health Survey 1976 (Others Indirect)
- National Health Survey 1977 (Others Indirect)
- National Health Survey 1978 (Others Indirect)
- Census 1980 (Census Indirect)
- National Health Survey 1984 (Others Indirect)
- Demographic and Health Survey 1986 (DHS Direct)
- National Health Survey 1986 (Others Indirect)
- Pesquisa Nacional por Amostra de Domicilios 1986 (Others Direct)
- Demographic and Health Survey 1986 (DHS Indirect)
- Census 1991 (Census Indirect)
- Demographic and Health Survey 1996 (DHS Direct)
- Demographic and Health Survey 1996 (DHS Indirect)
- Census 2000 (Census Indirect)
- Pesquisa Nacional por Amostra de Domicilios 2002 (Others Indirect)
- Pesquisa Nacional por Amostra de Domicilios 2003 (Others Indirect)
- Pesquisa Nacional por Amostra de Domicilios 2004 (Others Indirect)
- Pesquisa Nacional por Amostra de Domicilios 2005 (Others Indirect)
- Pesquisa Nacional por Amostra de Domicilios 2006 (Others Indirect)
- Pesquisa Nacional por Amostra de Domicilios 2007 (Others Indirect)
- Pesquisa Nacional por Amostra de Domicilios 2008 (Others Indirect)
- Pesquisa Nacional por Amostra de Domicilios 2009 (Others Indirect)
- Census 2010 (Census Indirect)
- Census 2010 (Others Household Deaths)
- Pesquisa Nacional por Amostra de Domicilios 2011 (Others Indirect)
- Pesquisa Nacional por Amostra de Domicilios 2012 (Others Indirect)
- Pesquisa Nacional por Amostra de Domicilios 2013 (Others Indirect)
- Pesquisa Nacional por Amostra de Domicilios 2014 (Others Indirect)
- Pesquisa Nacional por Amostra de Domicilios 2015 (Others Indirect)
- VR Data from Information System of Ministry of Health (Direct)
- VR WHO
- VR Data from Information System of Ministry of Health (Busca Ativa)

# Brunei Darussalam

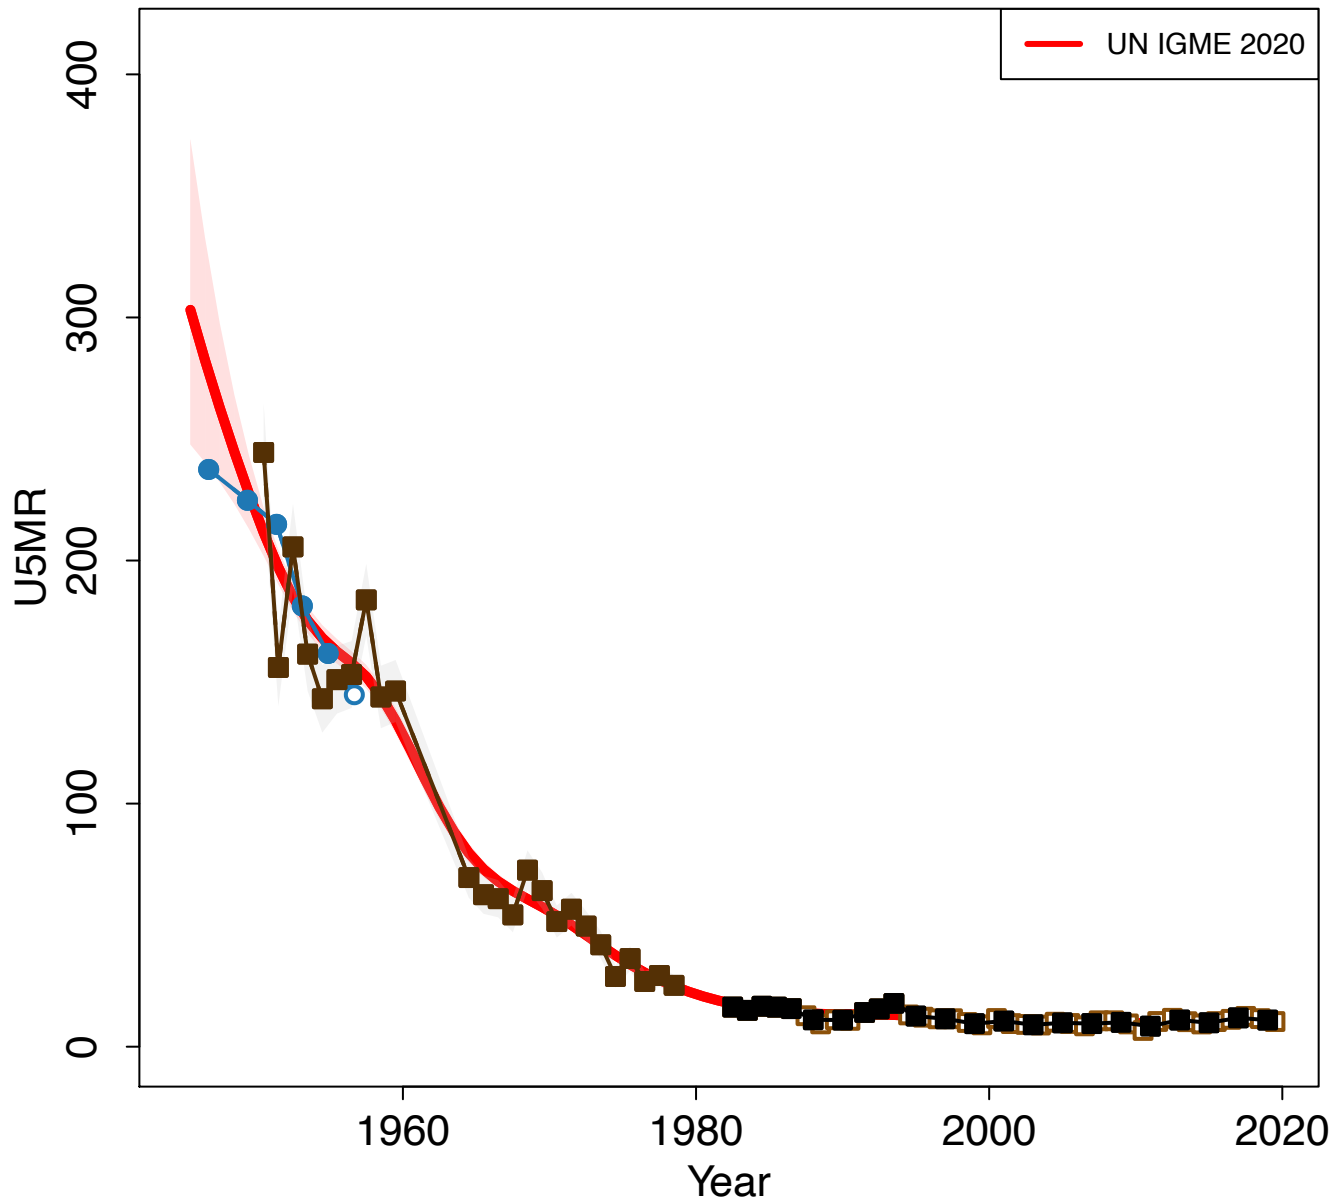

# Zoomed in

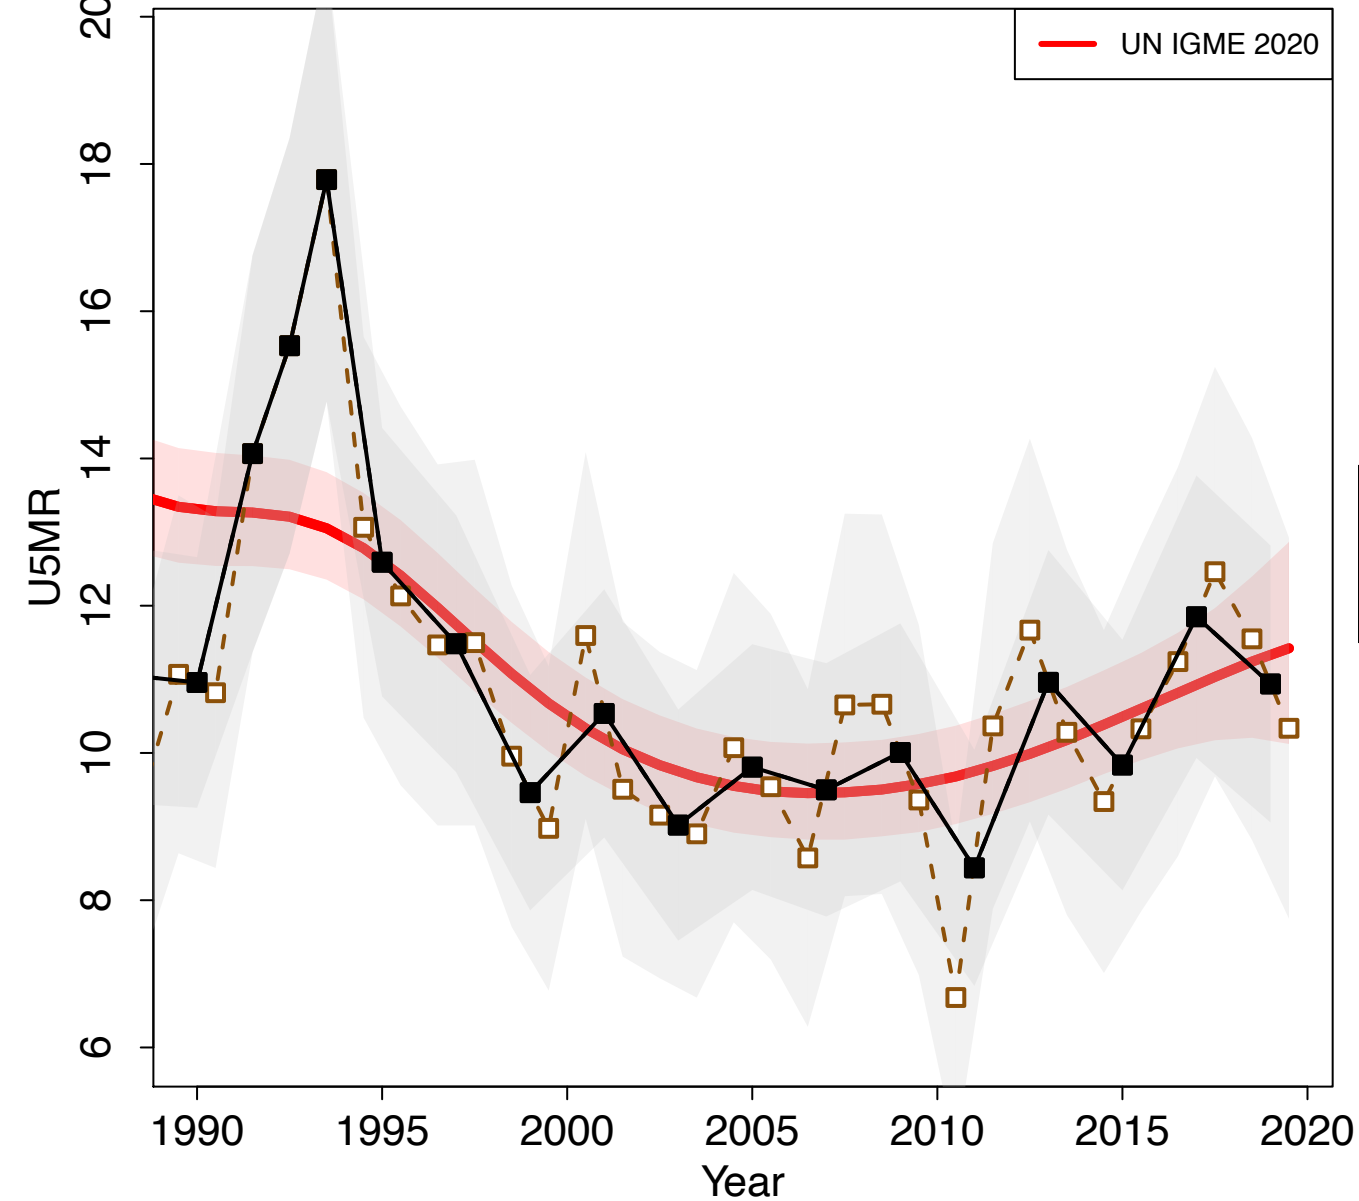

- Census 1960 (Census Indirect)
- VR WHO
- VR UNPD Demographic Yearbook Data 2020 version
- VR WHO (Recalculated)

### Bulgaria

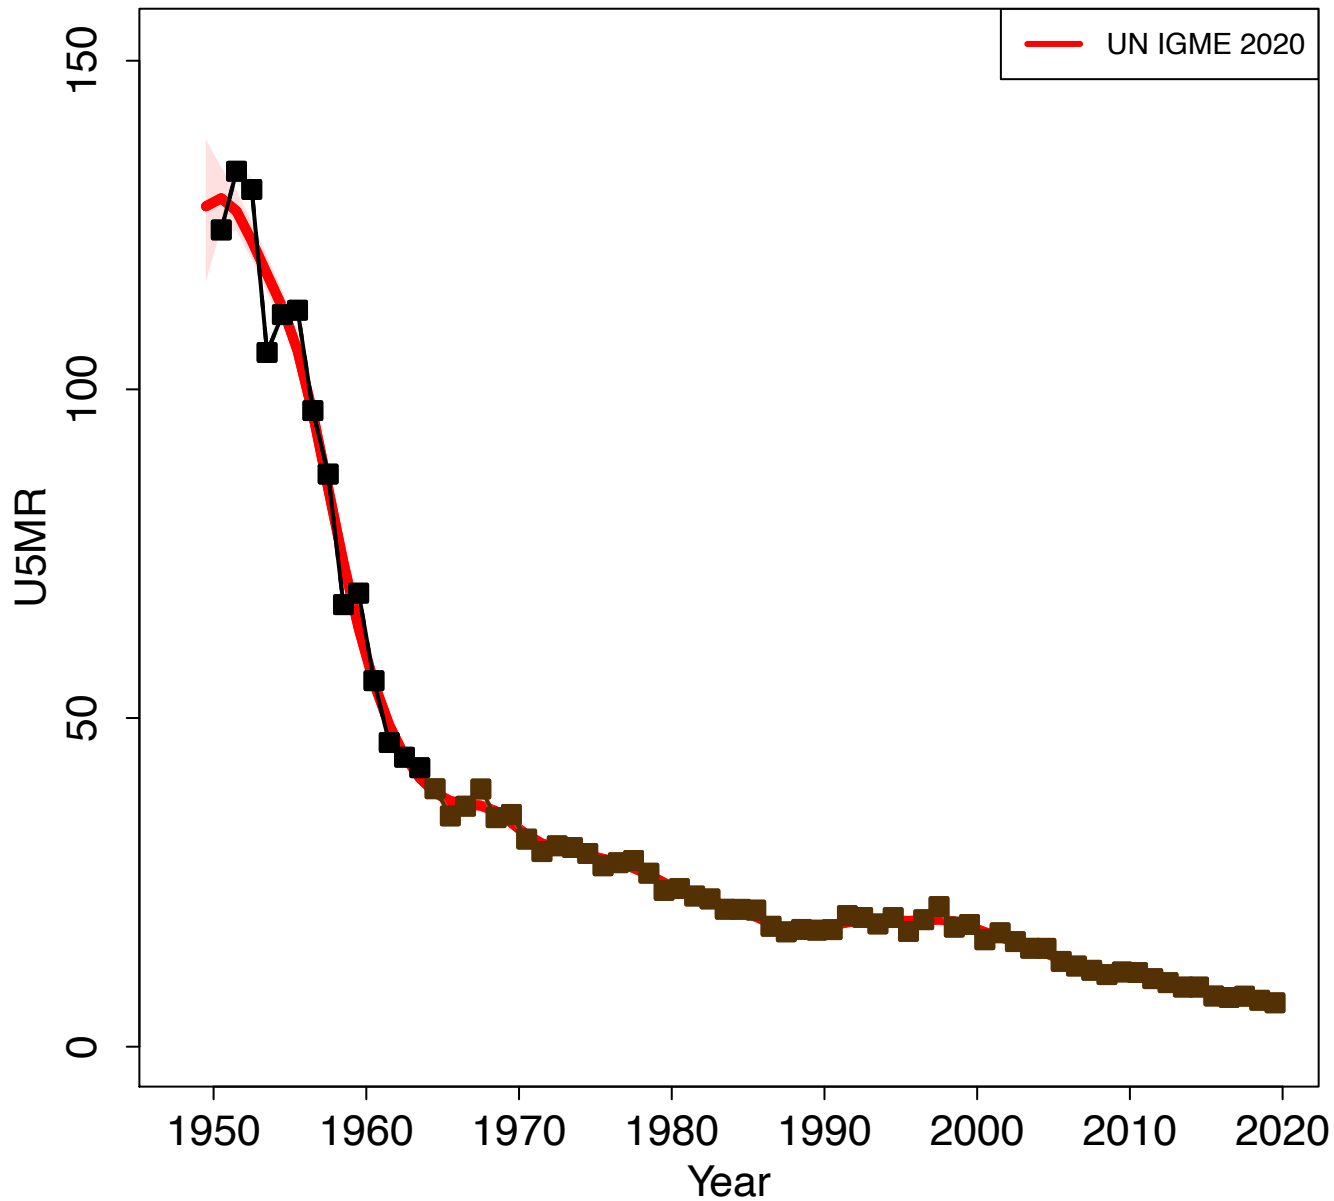

### Zoomed in

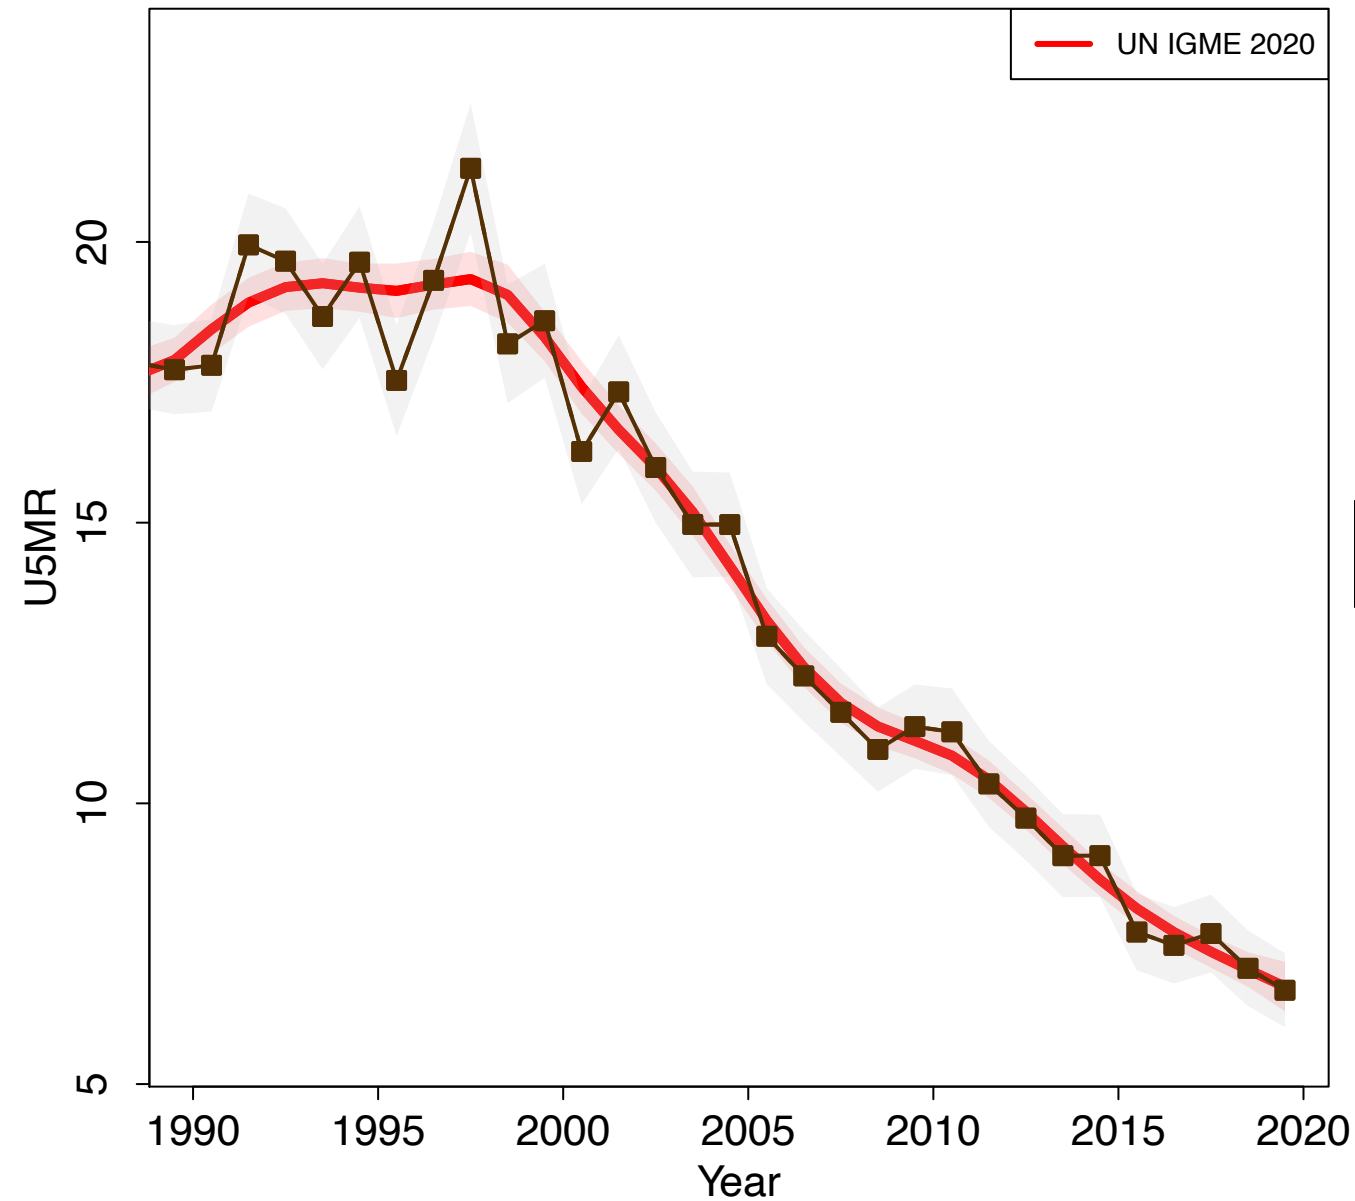

### Burkina Faso

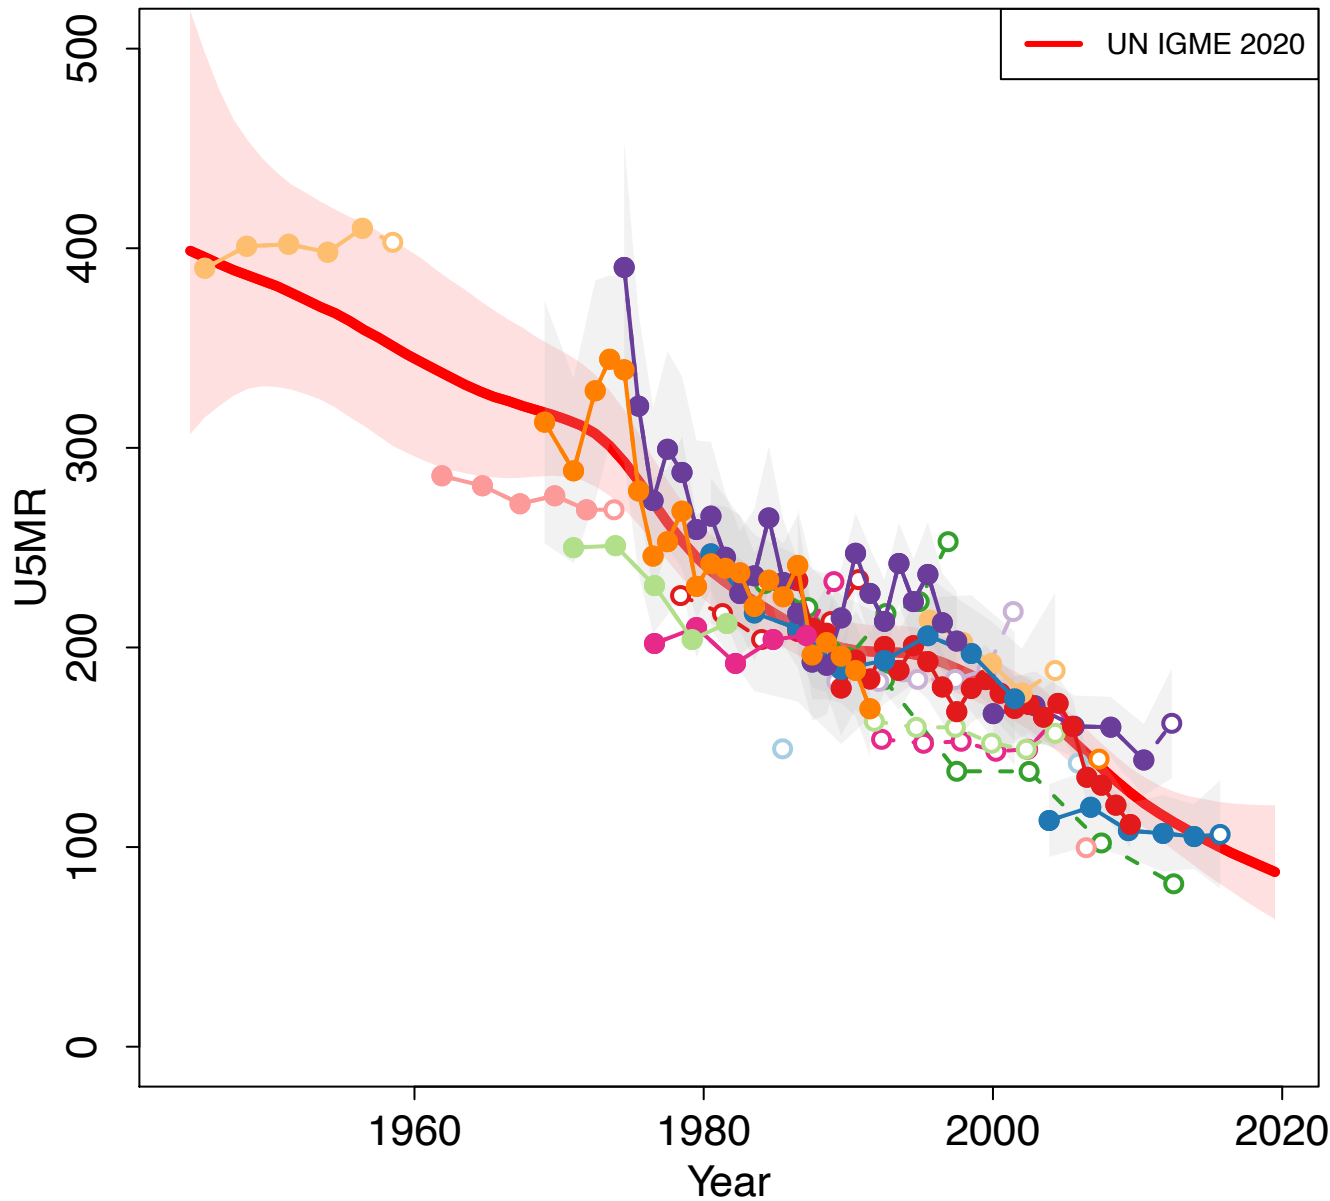

### Zoomed in

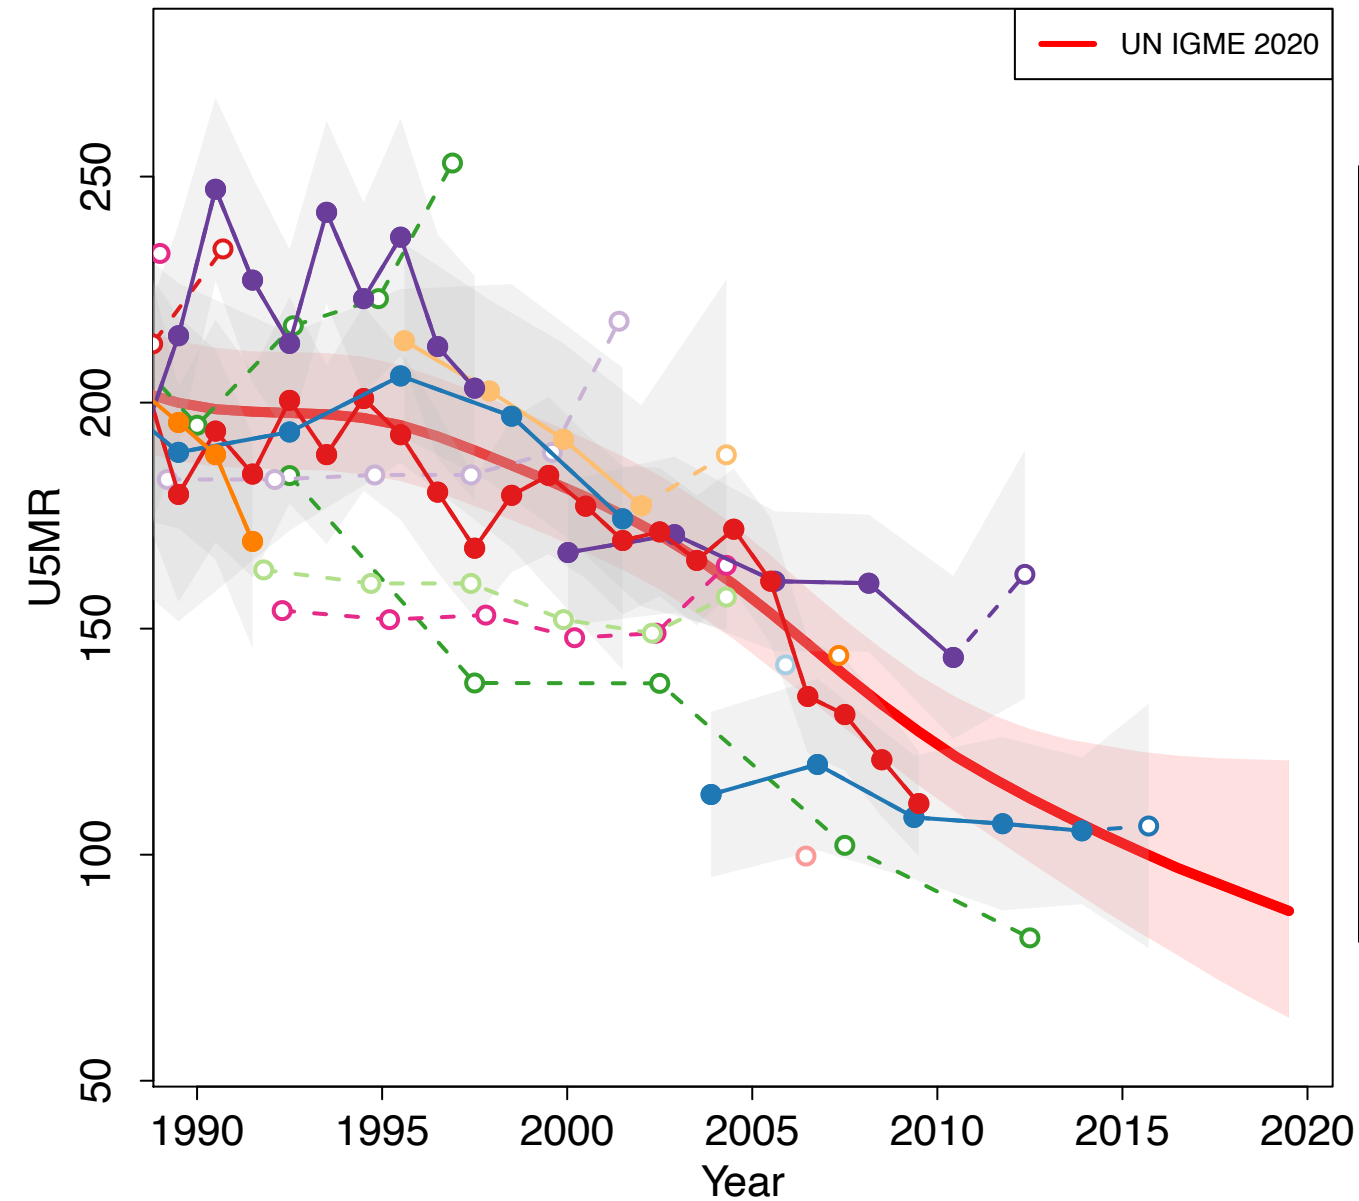

- Survey 1960–1961 (Others Indirect)
- Post-Enumeration Survey 1976 (Others Indirect)
- Census 1985 (Census Indirect)
- Census 1985 (Others Household Deaths)
- Survey 1991 (Others Indirect)
- Demographic and Health Survey 1993 (DHS Direct)
- Demographic and Health Survey 1993 (DHS Indirect)
- Demographic and Health Survey 1998–1999 (DHS Direct)
- Demographic and Health Survey 1998–1999 (DHS Indirect)
- Demographic and Health Survey 2003 (DHS Direct)
- Demographic and Health Survey 2003 (DHS Indirect)
- Multiple Indicator Cluster Survey 2006 (MICS Indirect)
- Census 2006 (Others Household Deaths)
- Census 2006 (Census Indirect)
- Recensement General de la Population et de l'Habitat (RGPH) 2006 (Others Household Deaths)
- Recensement General de la Population et de l'Habitat (RGPH) 2006 (Census Indirect)
- Global Fund Evaluation Survey 2008 (Others Household Deaths)
- Demographic and Health Survey 2010 (DHS Direct)
- Malaria Indicator Survey 2014 (Other DHS Indirect)
- L Enquete sur le Module Demographie et Sante 2015 (Others Direct)
- Malaria Indicator Survey 2017–2018 (Other DHS Indirect)

# Burundi

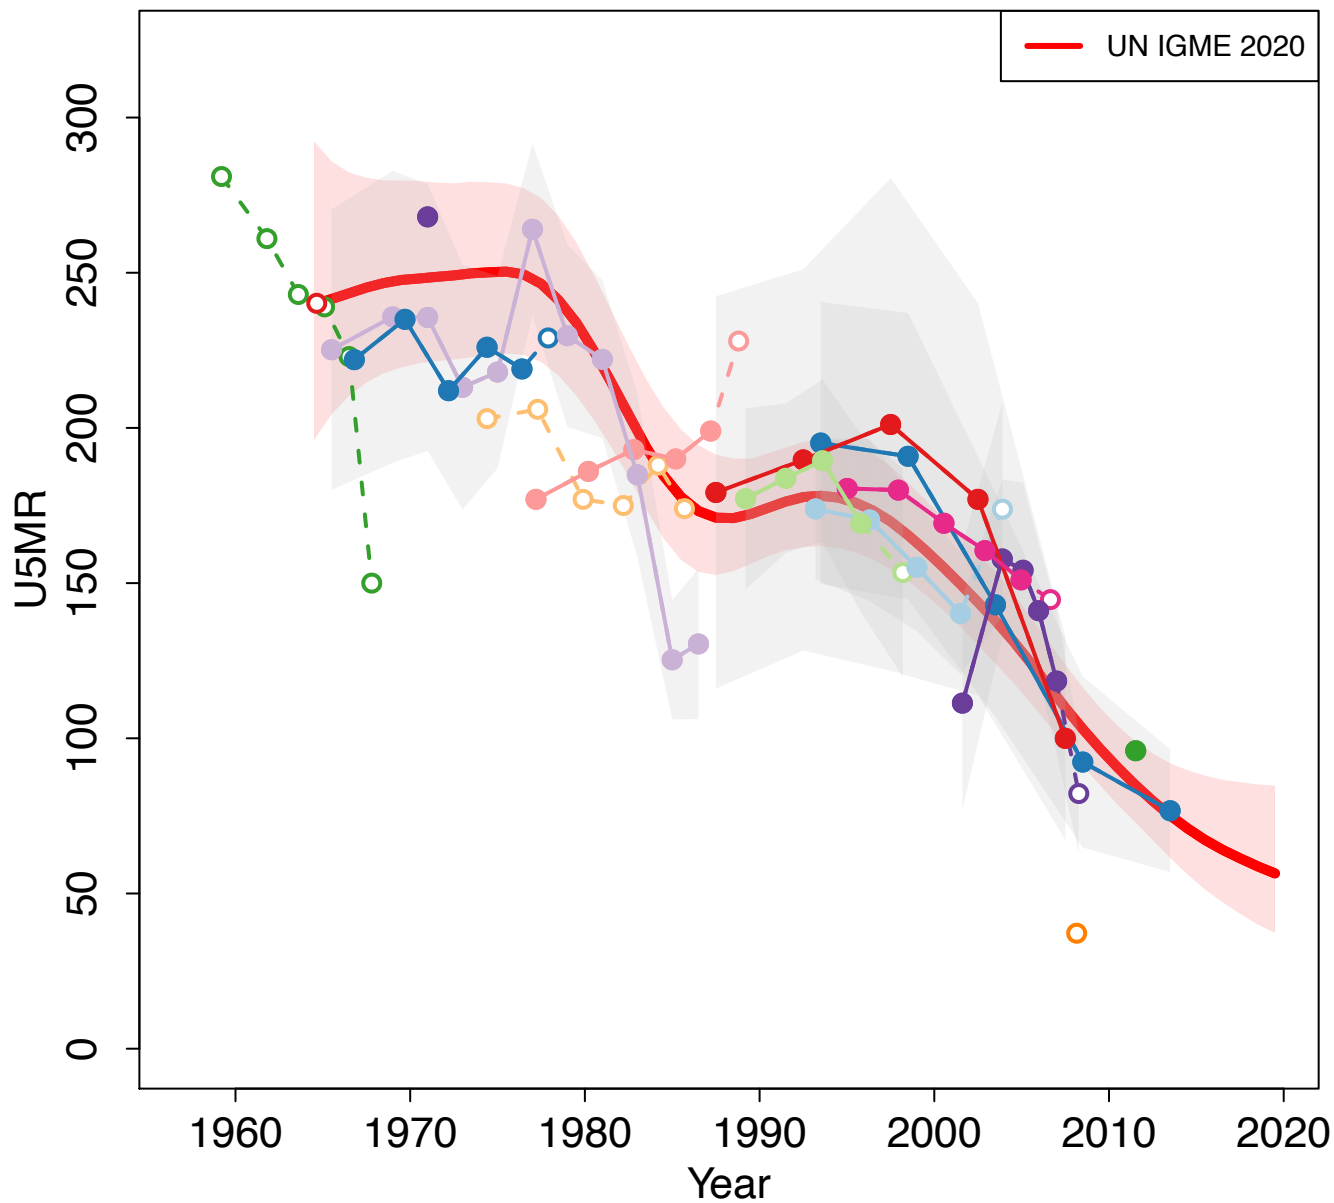

# Zoomed in

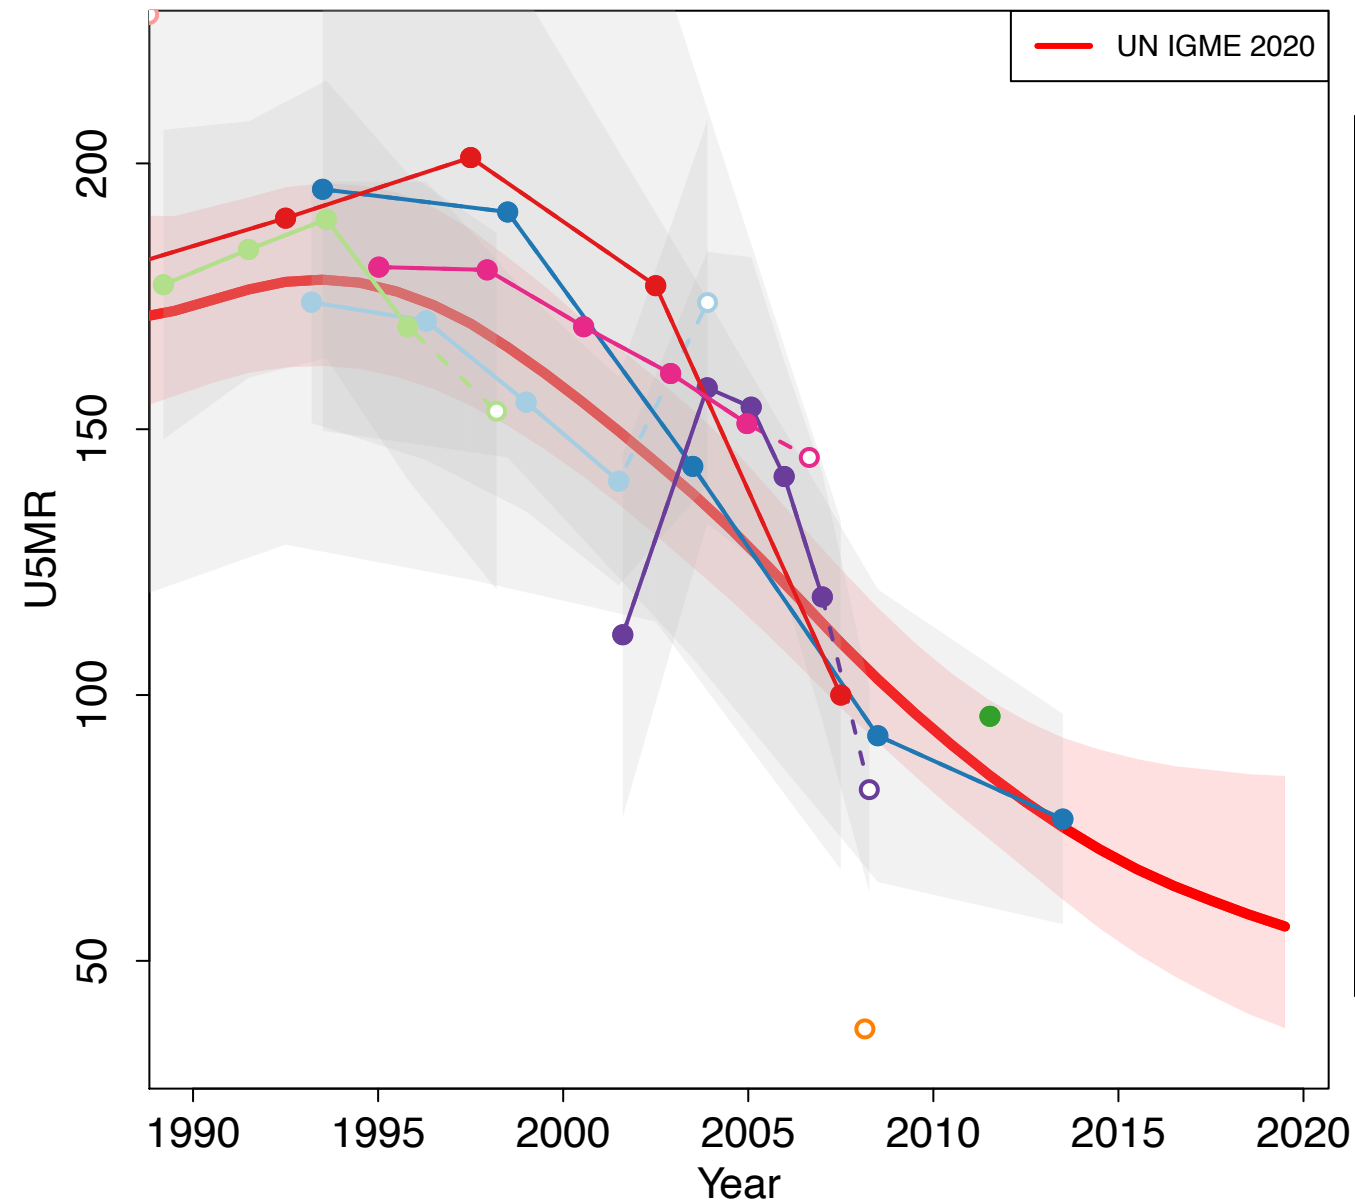

- Population Survey 1965 (Others Household Deaths)
- Demographic Survey 1970 (Others Direct)
- Demographic Survey 1970 (Others Indirect)
- Post Census Survey 1979 (Others Indirect)
- Demographic and Health Survey 1987 (DHS Direct)
- Demographic and Health Survey 1987 (DHS Indirect)
- Census 1990 (Census Indirect)
- Multiple Indicator Cluster Survey 2000 (MICS Indirect)
- Multiple Indicator Cluster Survey 2005 (MICS Indirect)
- Census 2008 (Census Indirect)
- Census 2008 (Others Household Deaths)
- Demographic and Health Survey 2010–2011 (DHS Direct)
- Malaria Indicator Survey 2012 (Other DHS Indirect)
- Enquete menages pour le suivi et l'évaluation de l'impact de l'appui au système de rembourser du Paquet Minimum des Services de santé 2012 (Others Indirect)
- Demographic and Health Survey 2016–2017 (DHS Direct)

### Cambodia

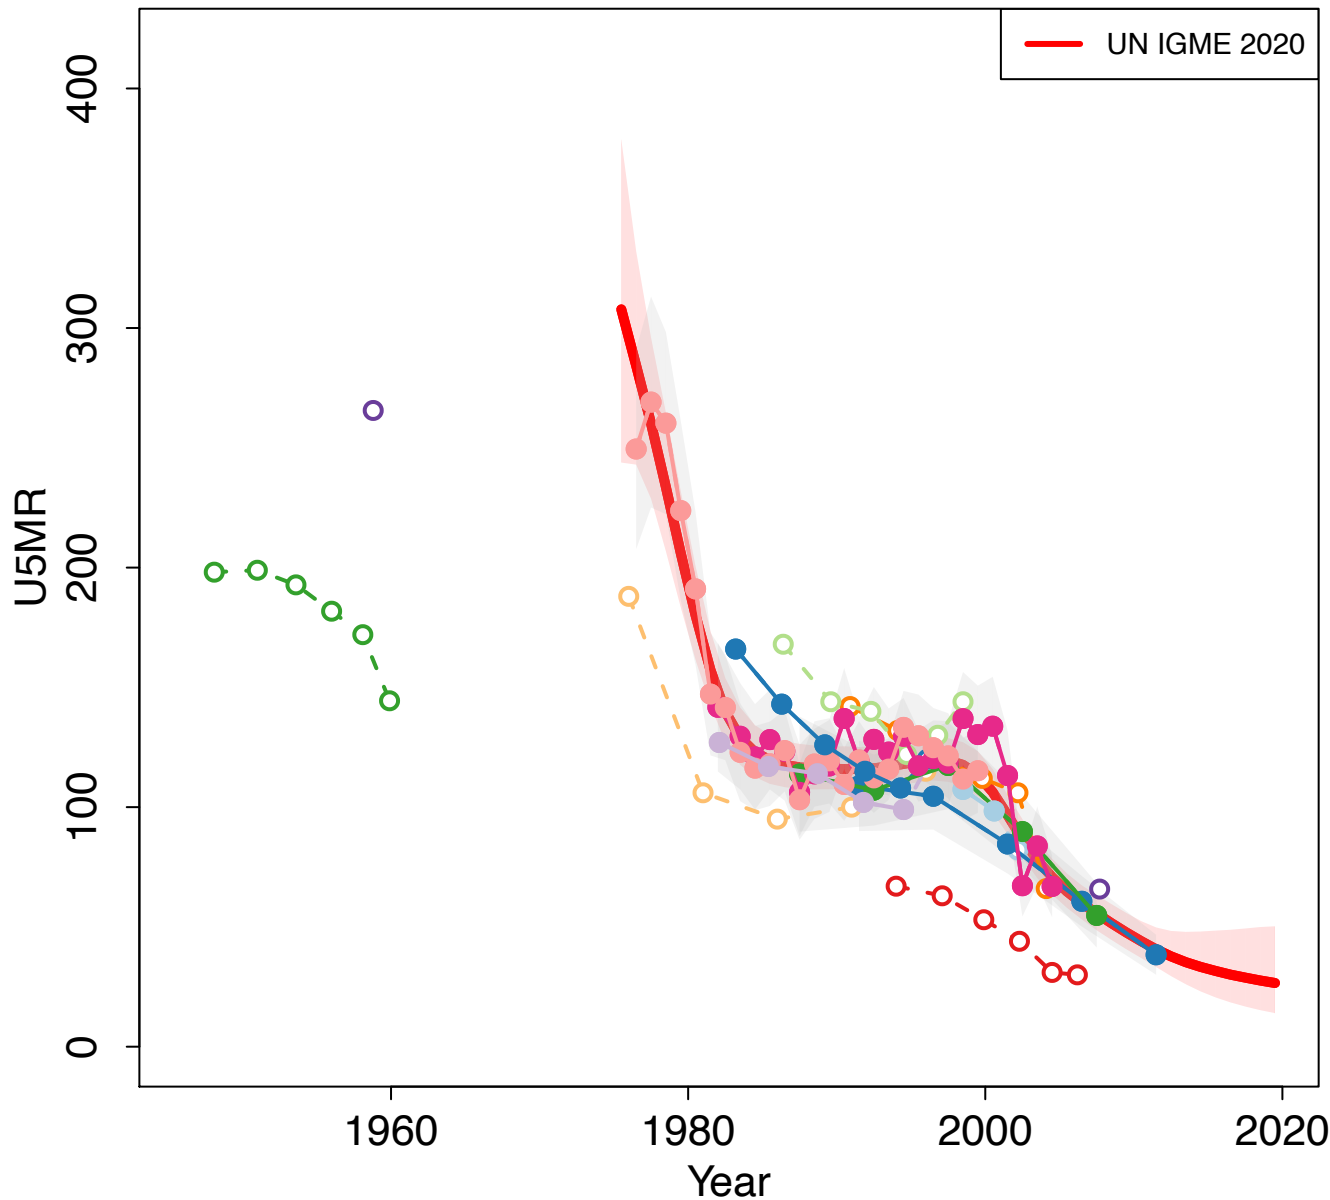

### Zoomed in

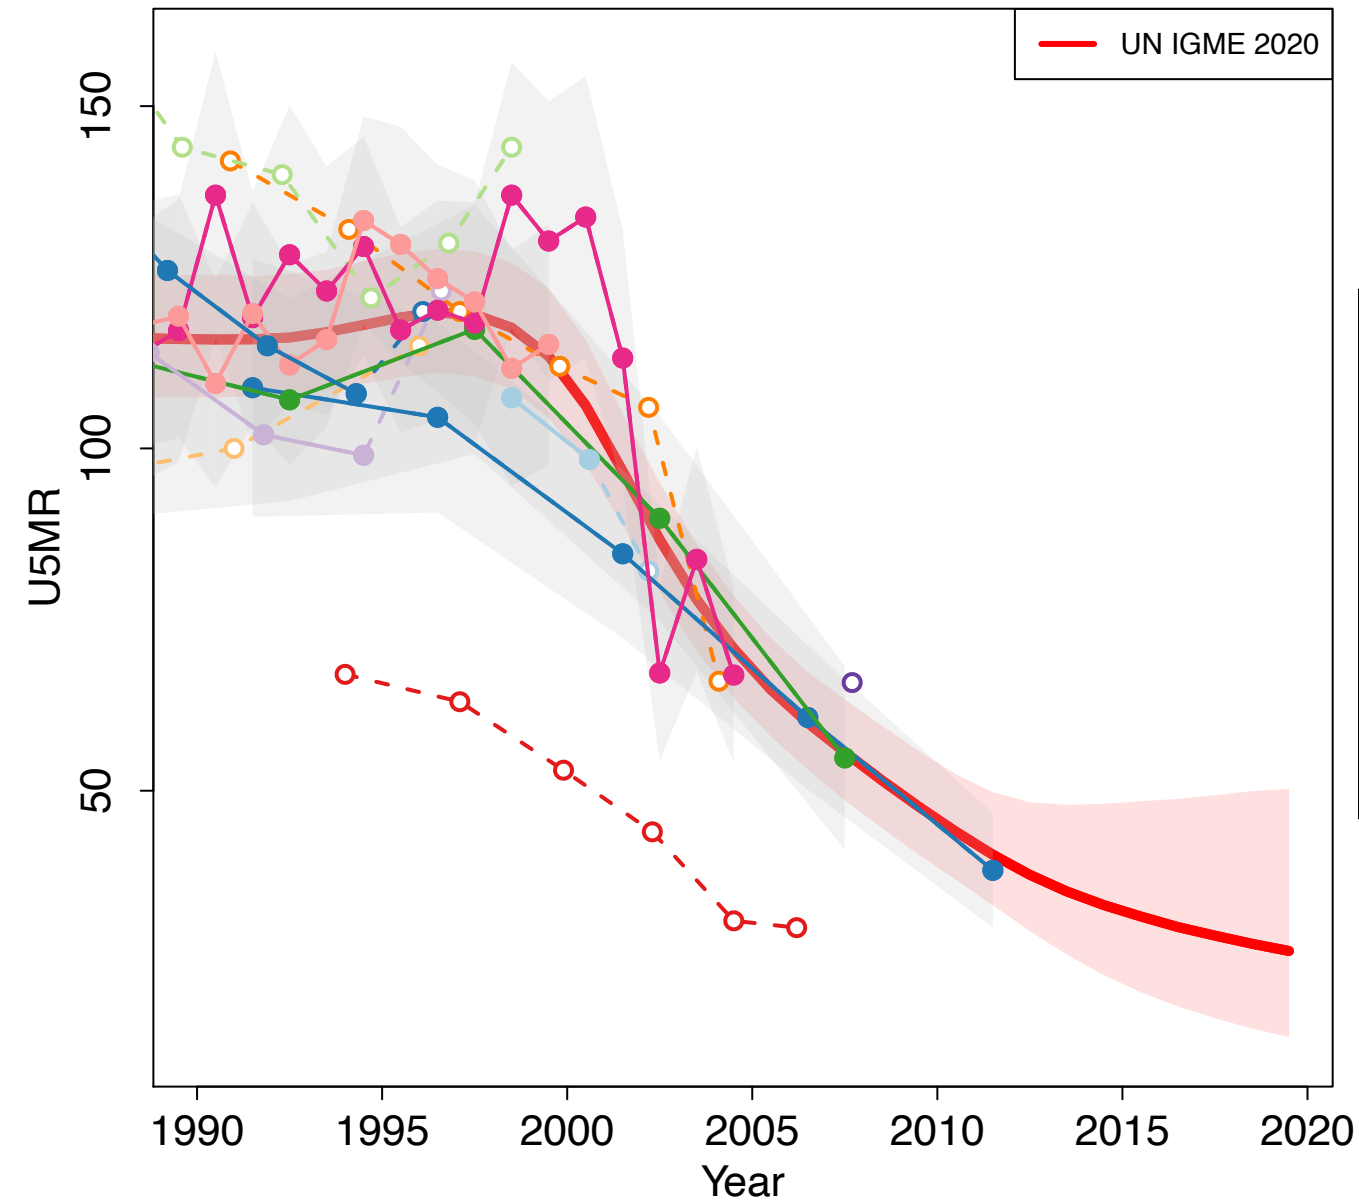

- Survey 1959 (Others Household Deaths)
- Census extracted from IPUMS 1962 (Census Indirect)
- Census 1998 (Census Indirect)
- National Health Survey 1998 (Other DHS Indirect)
- National Health Survey 1998 (Other DHS Direct)
- Demographic and Health Survey 2000 (DHS Direct)
- Demographic and Health Survey 2000 (DHS Indirect)
- Inter-censal Population Survey 2004 (Others Indirect)
- Demographic and Health Survey 2005 (DHS Direct)
- Demographic and Health Survey 2005 (DHS Indirect)
- Census 2008 (Census Indirect)
- Census extracted from IPUMS 2008 (Others Household Deaths)
- Demographic and Health Survey 2010 (DHS Direct)
- Demographic and Health Survey 2014 (DHS Direct)

# Cameroon

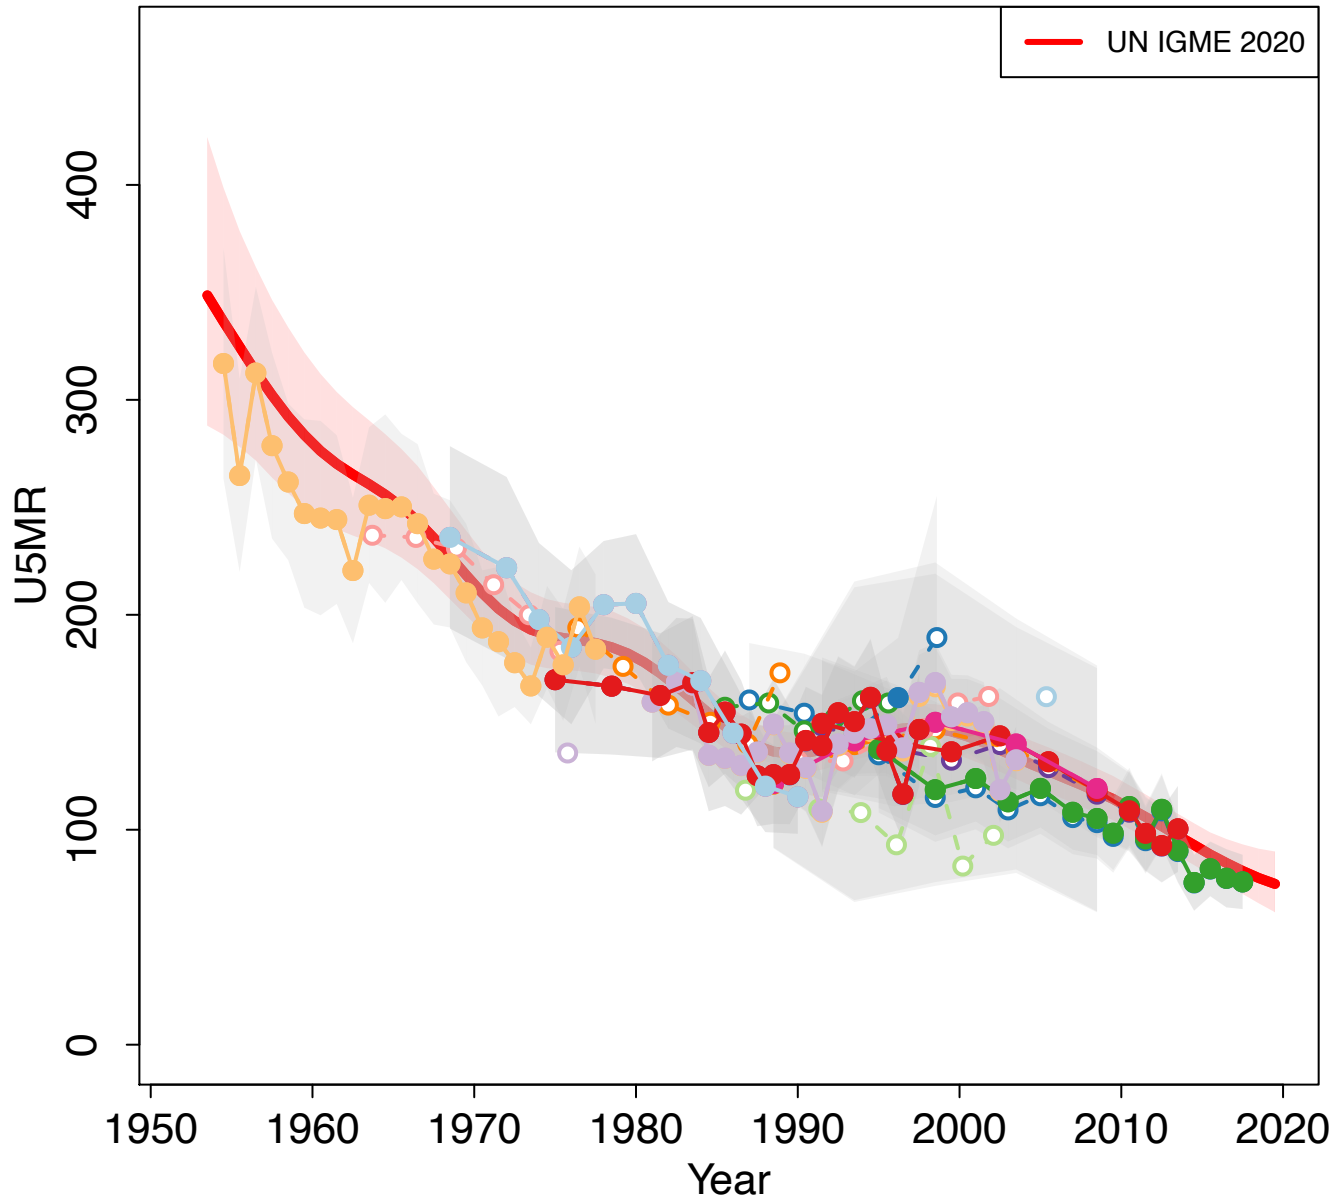

# Zoomed in

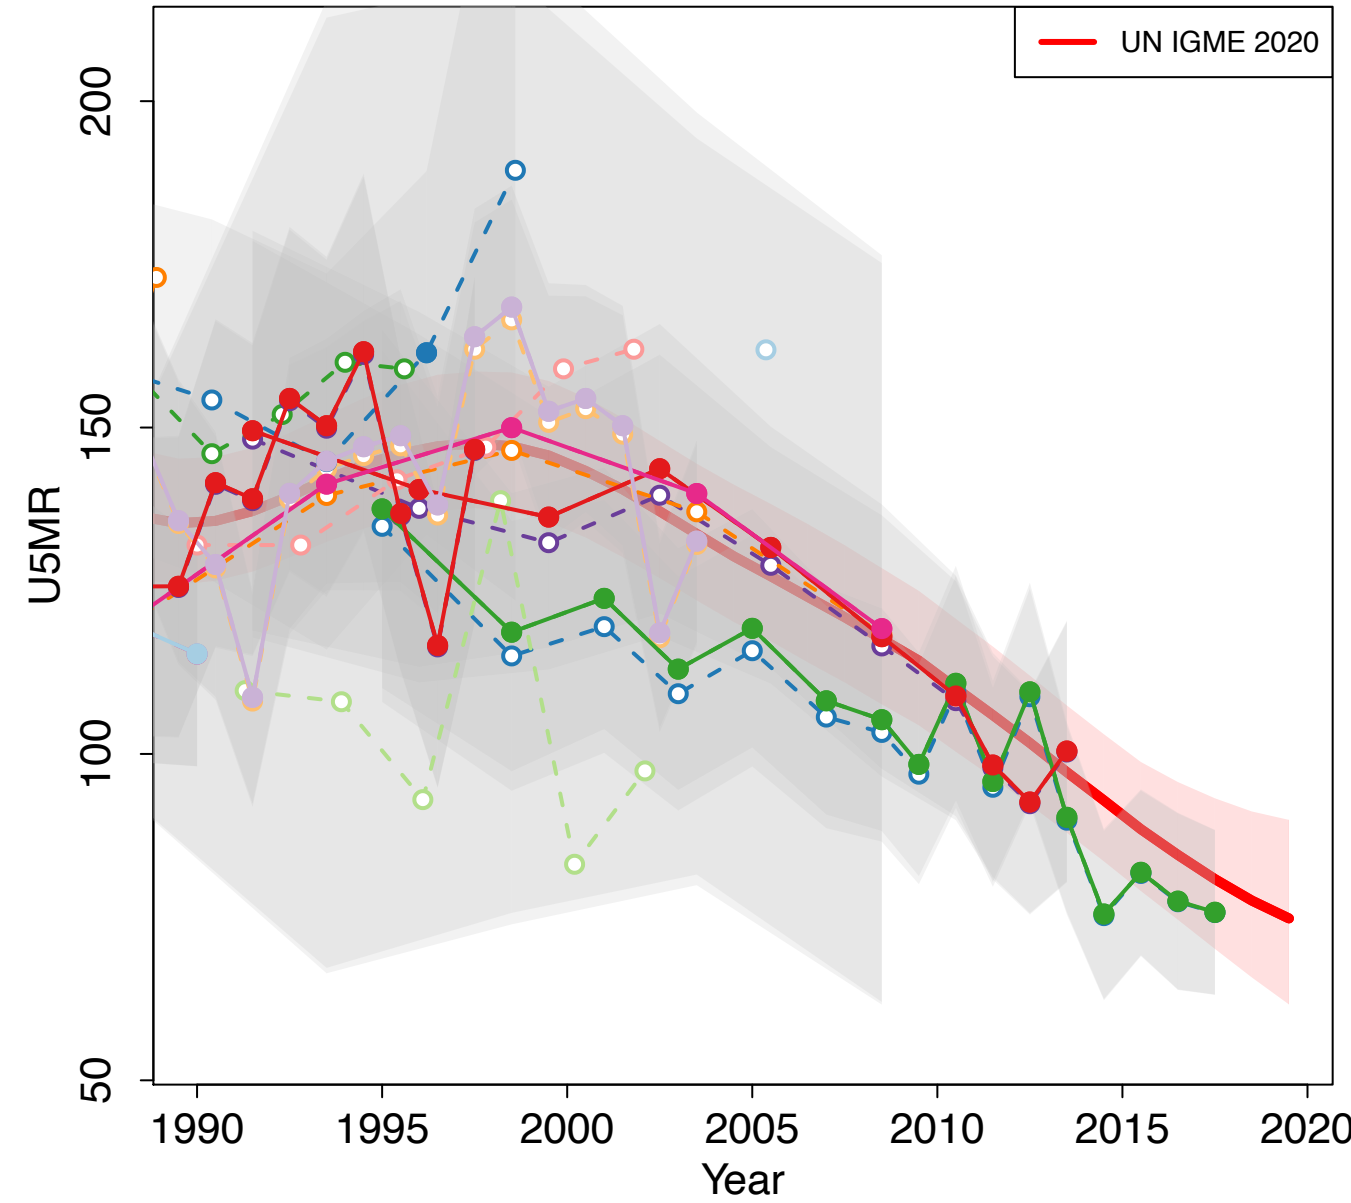

- Census 1976 (Others Household Deaths)
- World Fertility Survey 1978 (Other DHS Direct)
- World Fertility Survey 1978 (Other DHS Indirect)
- Census 1987 (Others Household Deaths)
- Demographic and Health Survey (MM adjusted) 1991 (DHS Direct)
- Demographic and Health Survey 1991 (DHS Direct)
- Demographic and Health Survey 1991 (DHS Indirect)
- Demographic and Health Survey (MM adjusted) 1998 (DHS Direct)
- Demographic and Health Survey 1998 (DHS Direct)
- Demographic and Health Survey 1998 (DHS Indirect)
- Multiple Indicator Cluster Survey 2000 (MICS Indirect)
- Demographic and Health Survey (MM adjusted) 2004 (DHS Direct)
- Demographic and Health Survey 2004 (DHS Direct)
- Demographic and Health Survey 2004 (DHS Indirect)
- Census 2005 (Census Indirect)
- Census 2005 (Others Household Deaths)
- Demographic and Health Survey (MM adjusted) 2011 (DHS Direct)
- Demographic and Health Survey 2011 (DHS Direct)
- Multiple Indicator Cluster Survey (MM adjusted) 2014 (MICS Direct)
- Multiple Indicator Cluster Survey 2014 (MICS Direct)
- Demographic and Health Survey (MM adjusted) 2018 (DHS Direct)
- Demographic and Health Survey 2018 (DHS Direct)



Canada

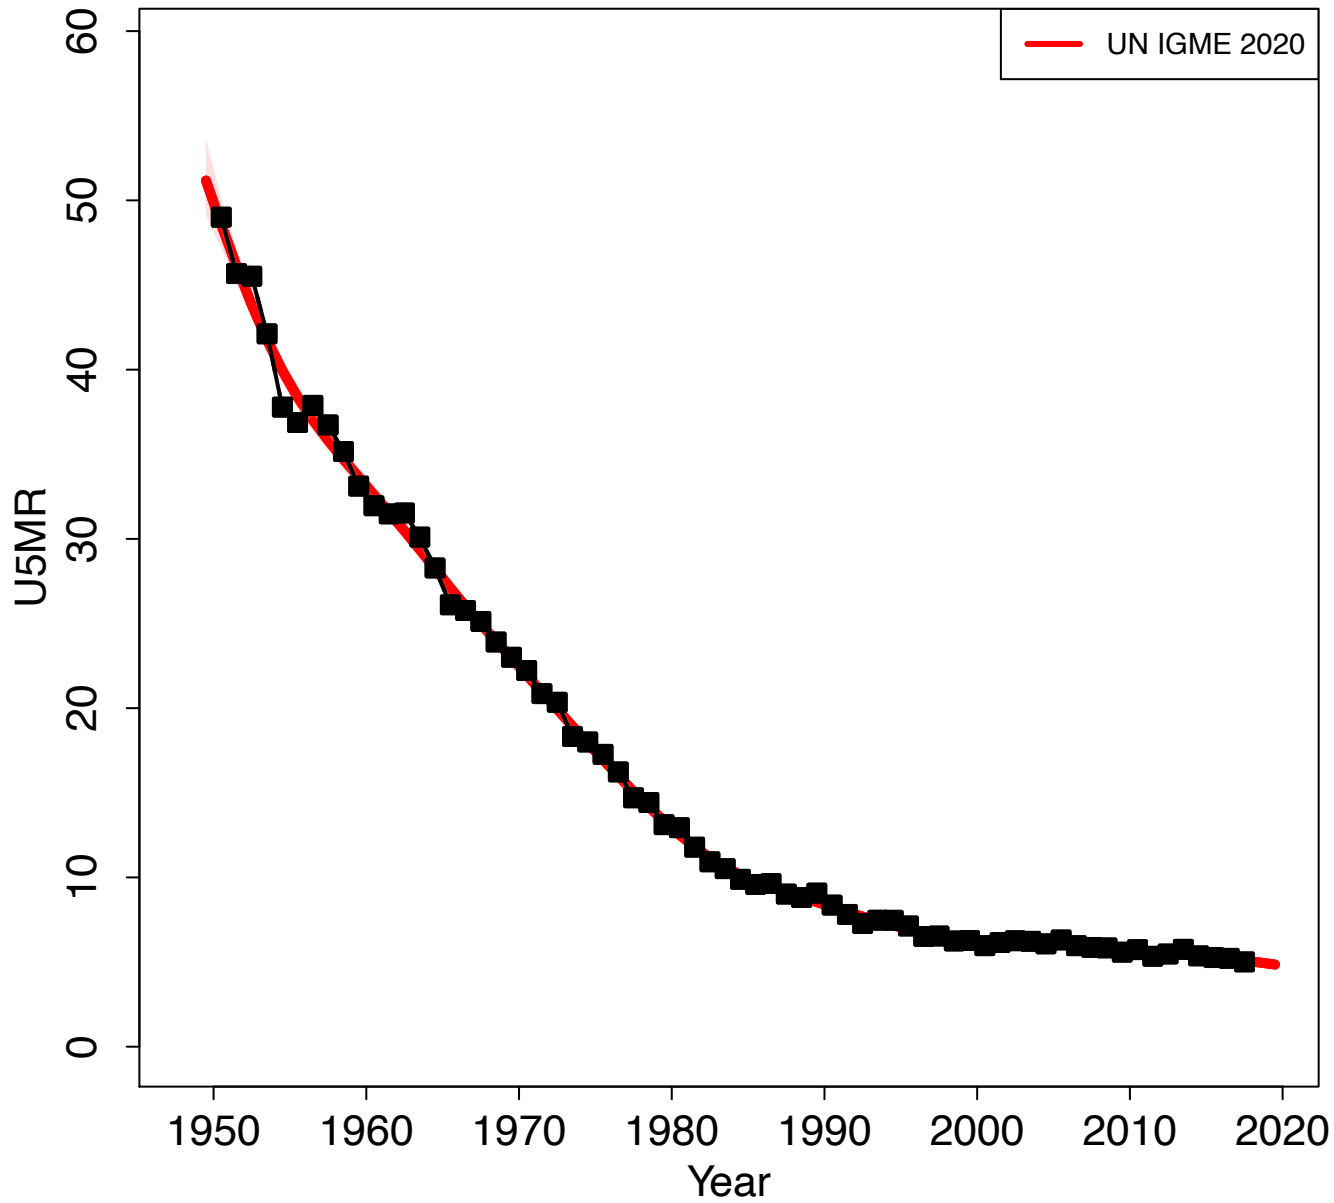

Zoomed in

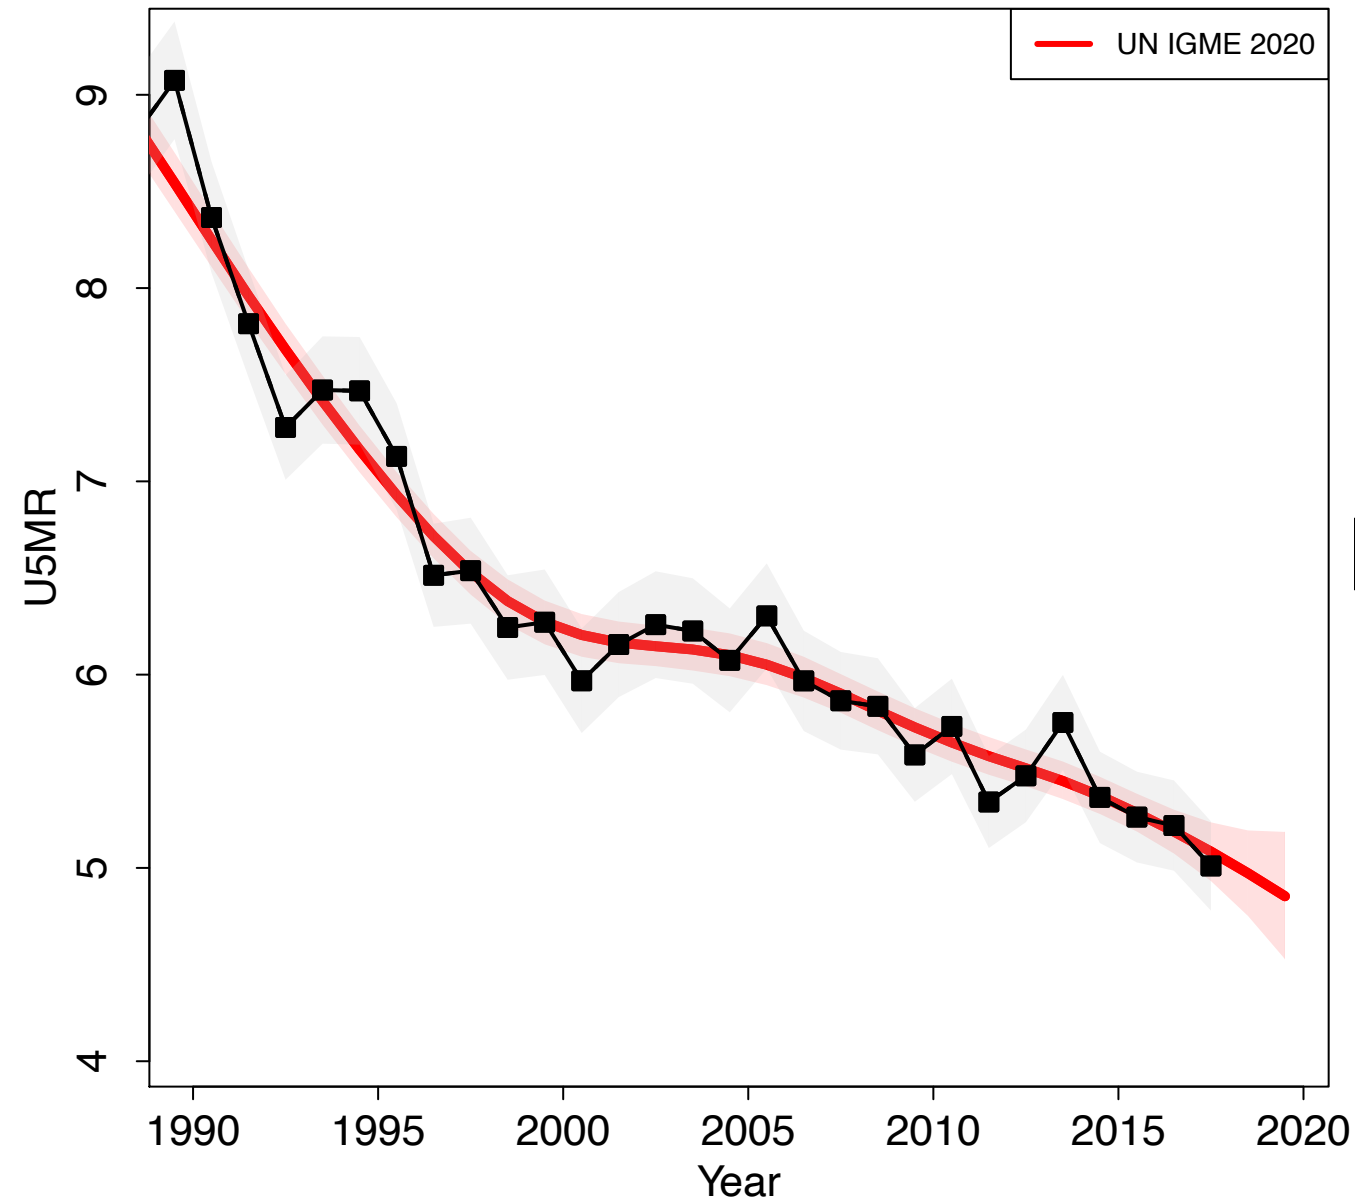



### Cabo Verde

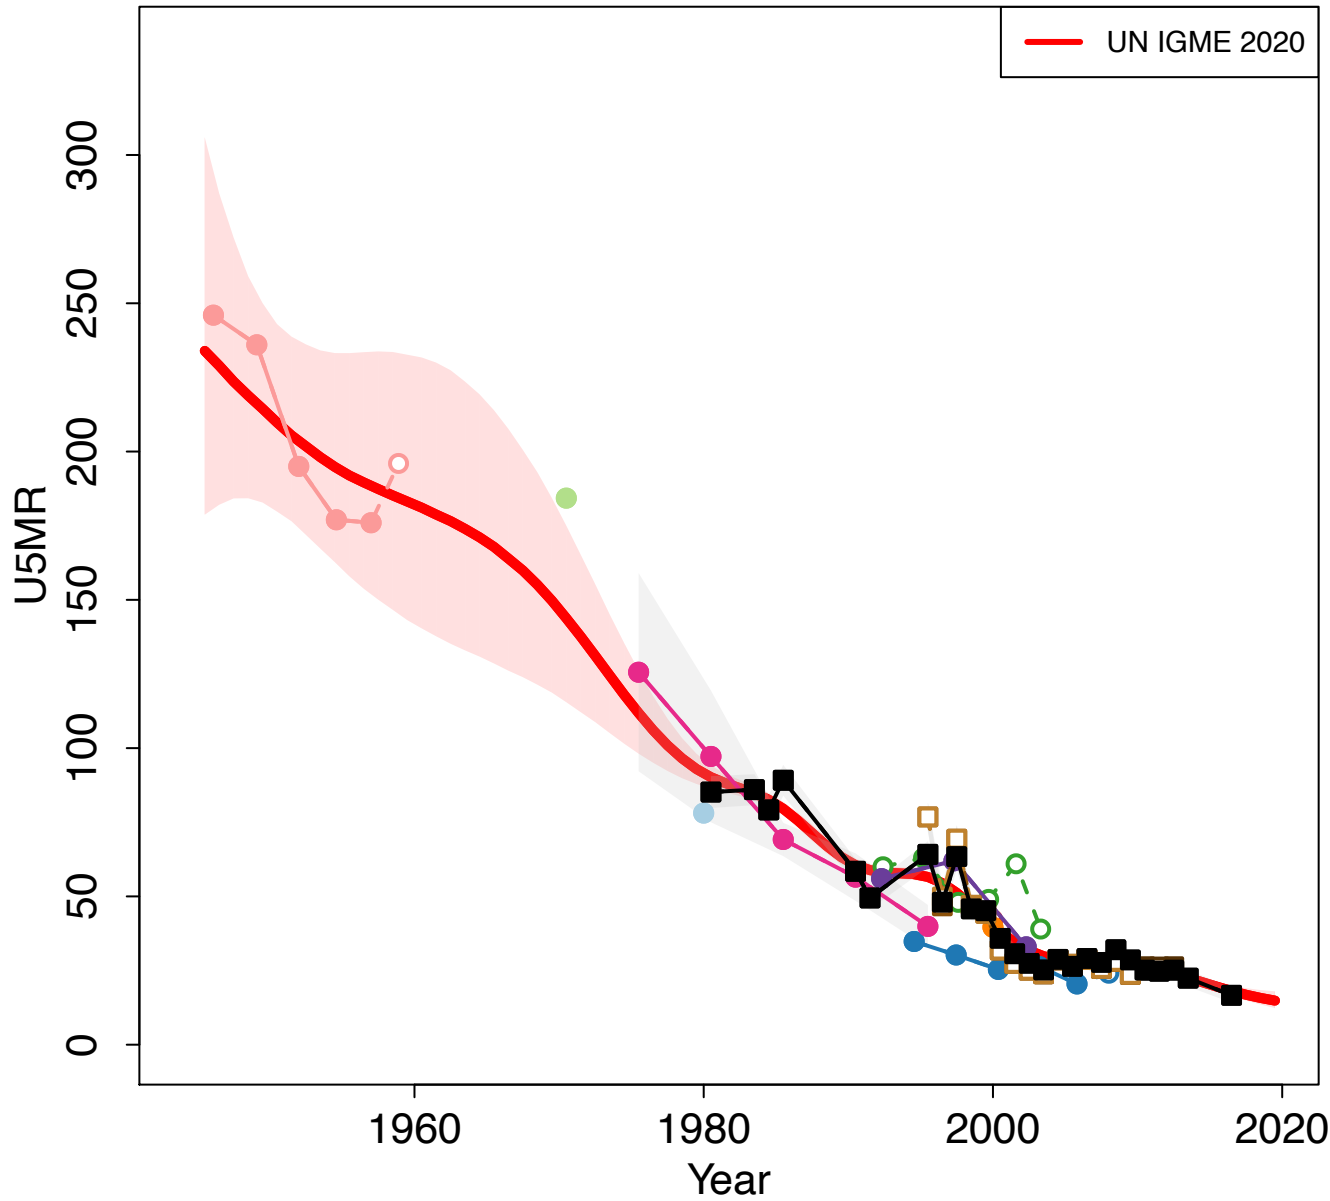

### Zoomed in

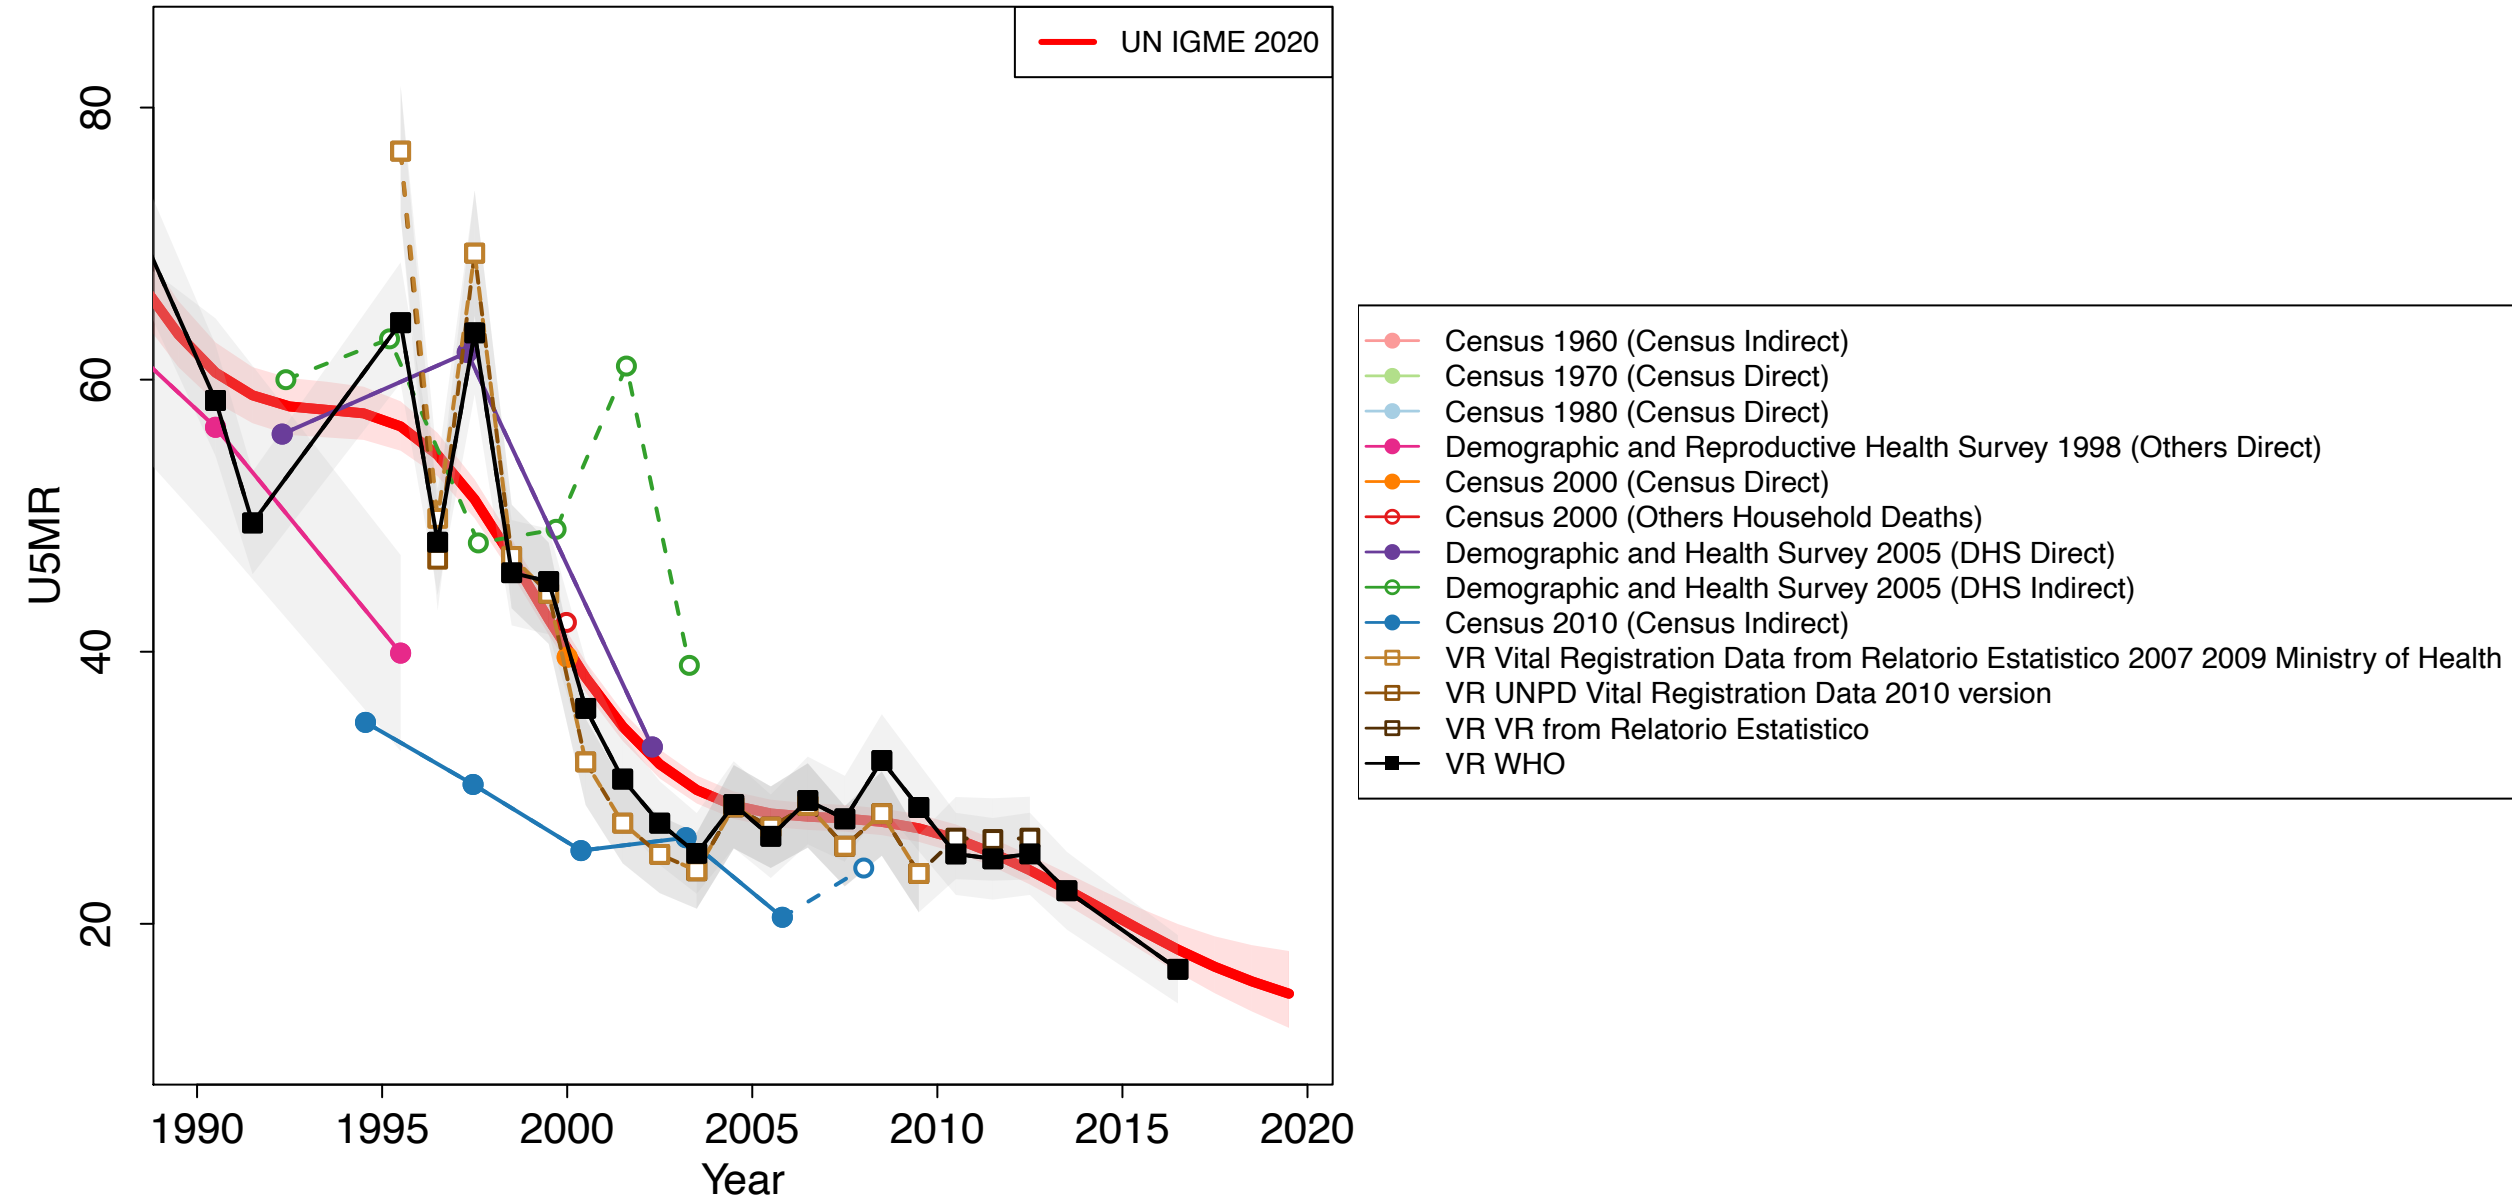

### Central African Republic

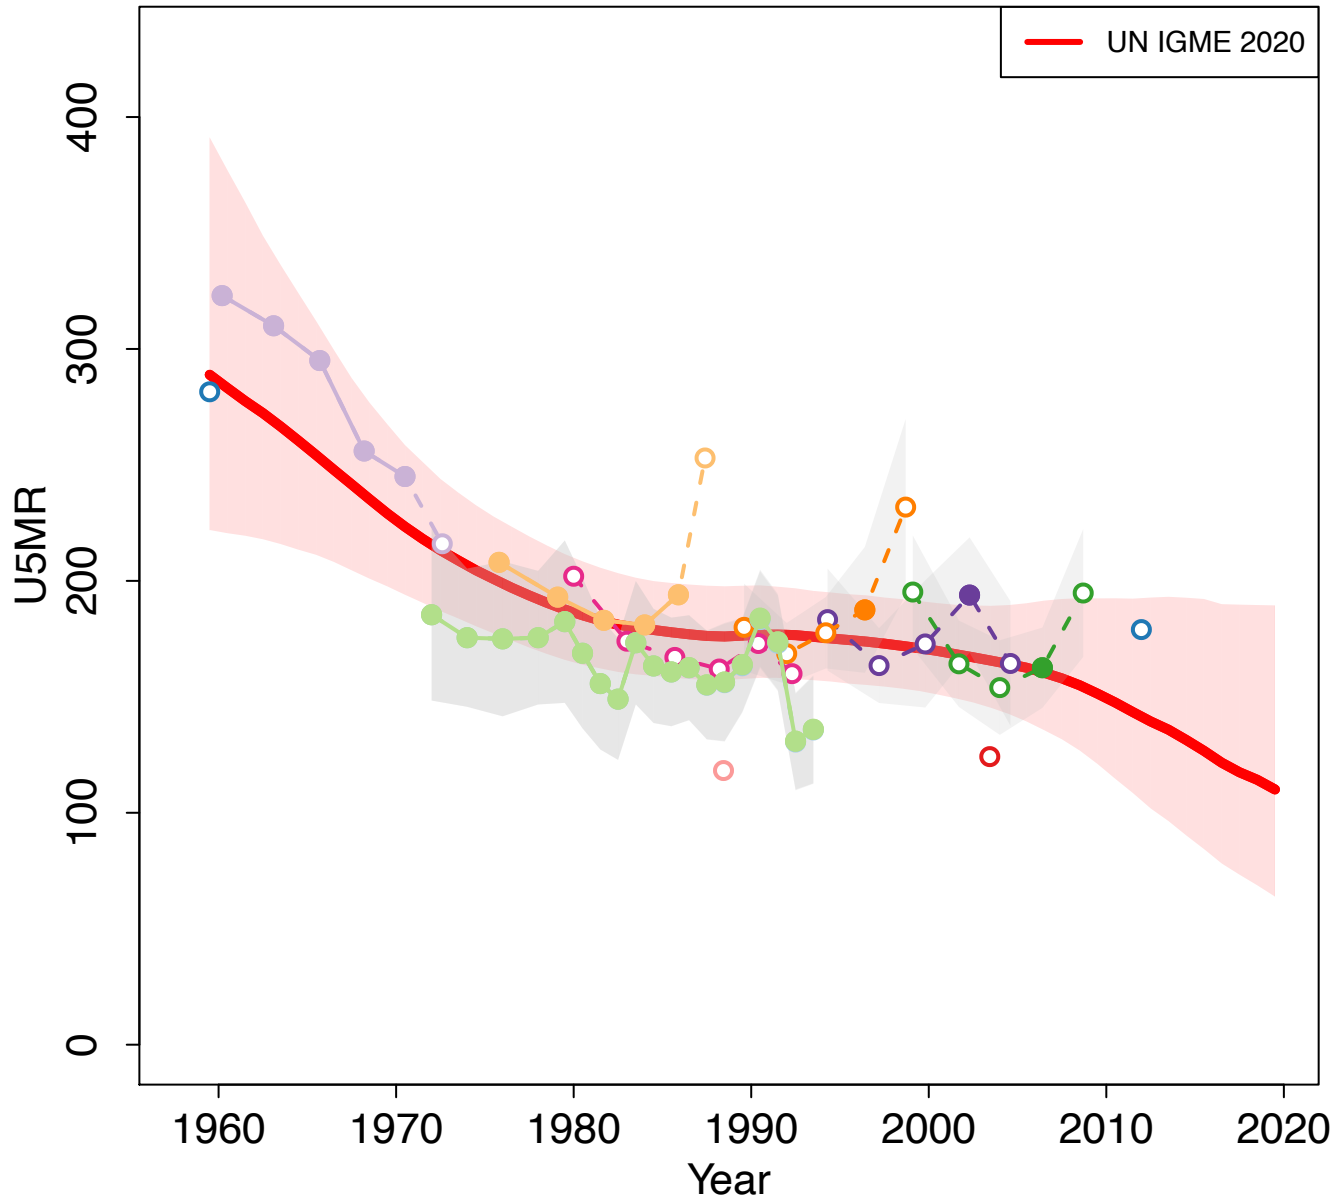

### Zoomed in

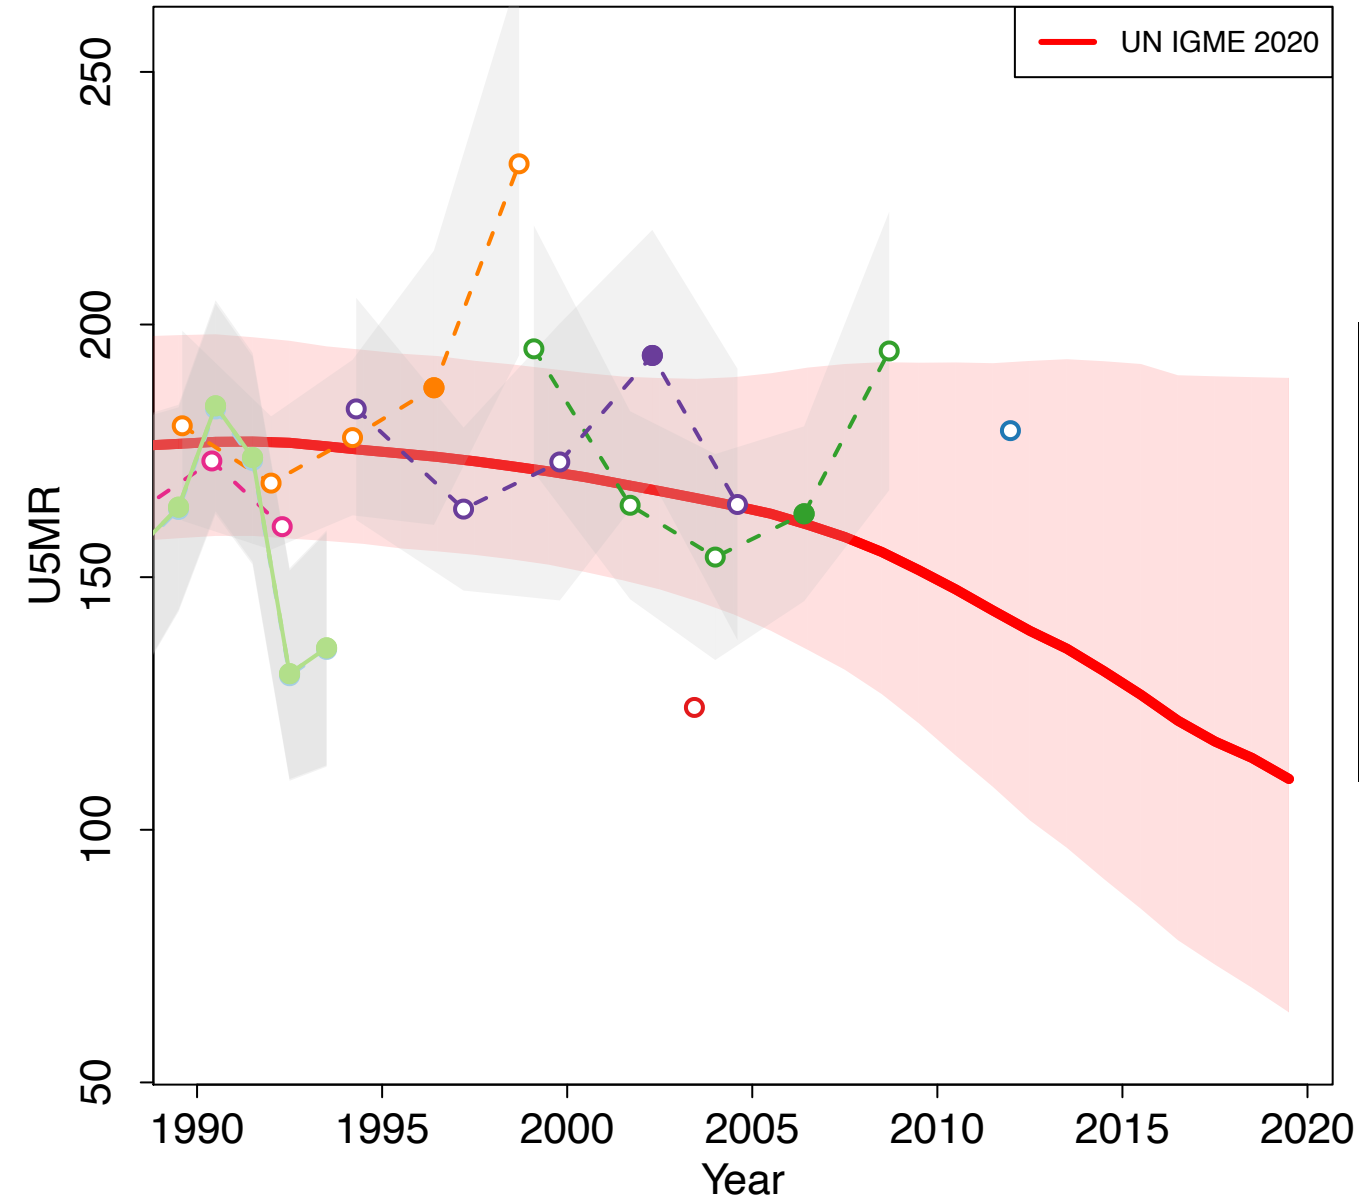

- Survey 1959–1960 (Others Household Deaths)
- Census 1975 (Census Indirect)
- Census 1988 (Census Indirect)
- Census 1988 (Others Household Deaths)
- Demographic and Health Survey (MM adjusted) 1994–1995 (DHS Direct)
- Demographic and Health Survey 1994–1995 (DHS Direct)
- Demographic and Health Survey 1994–1995 (DHS Indirect)
- Multiple Indicator Cluster Survey 2000 (MICS Indirect)
- Census 2003 (Others Household Deaths)
- Multiple Indicator Cluster Survey 2006 (MICS Indirect)
- Multiple Indicator Cluster Survey 2010 (MICS Indirect)
- Enquete Nationale Sur la Situation Nutritionnelle et la Mortalite 2012 (Others Household Deaths)

### Chad

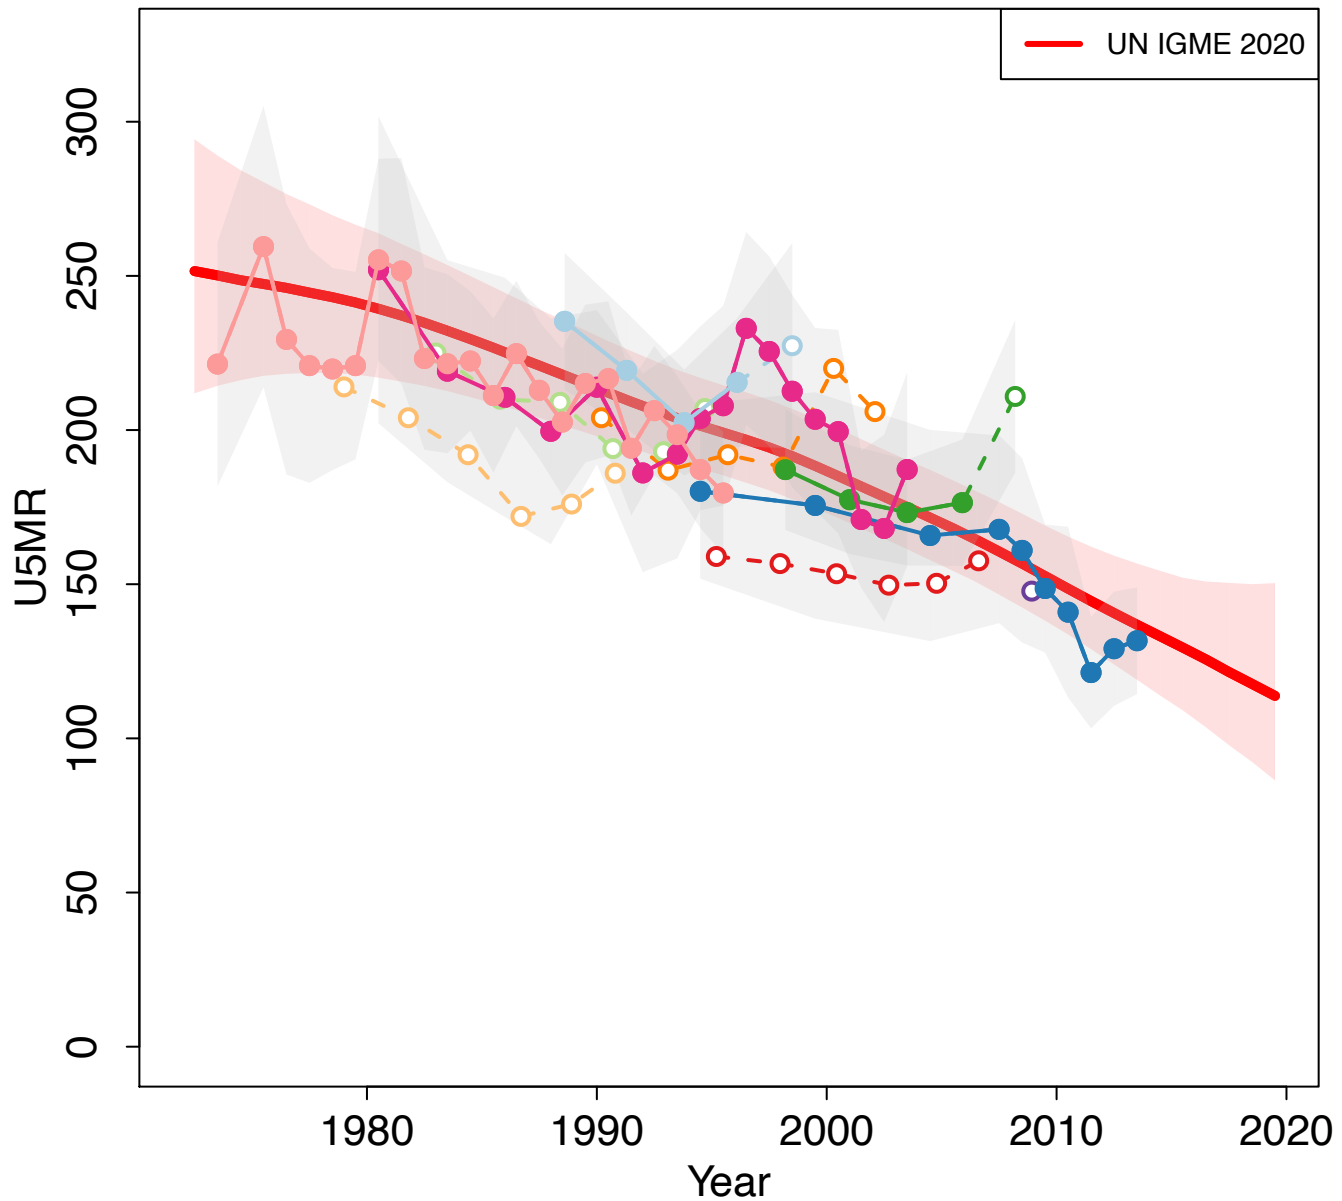

### Zoomed in

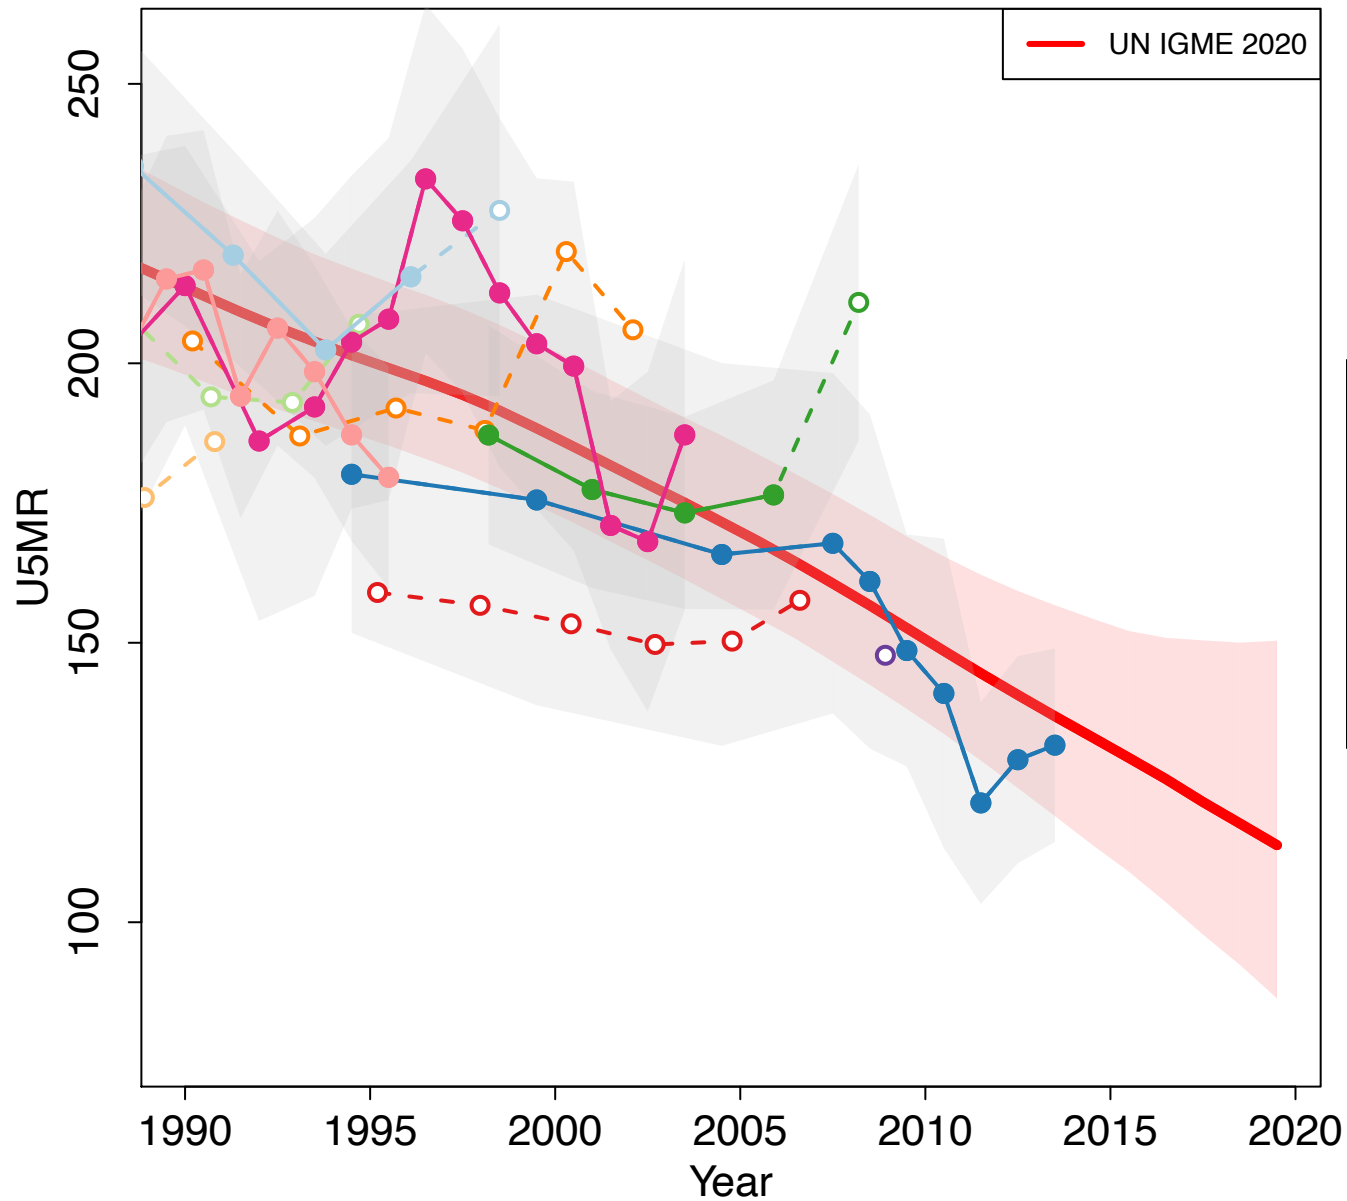

- Census 1993 (Census Indirect)
- Demographic and Health Survey 1996–1997 (DHS Direct)
- Demographic and Health Survey 1996–1997 (DHS Indirect)
- Multiple Indicator Cluster Survey 2000 (MICS Indirect)
- Demographic and Health Survey 2004 (DHS Direct)
- Demographic and Health Survey 2004 (DHS Indirect)
- Census 2009 (Census Indirect)
- Census 2009 (Others Household Deaths)
- Multiple Indicator Cluster Survey 2010 (MICS Indirect)
- Demographic and Health Survey 2014–2015 (DHS Direct)

### Chile

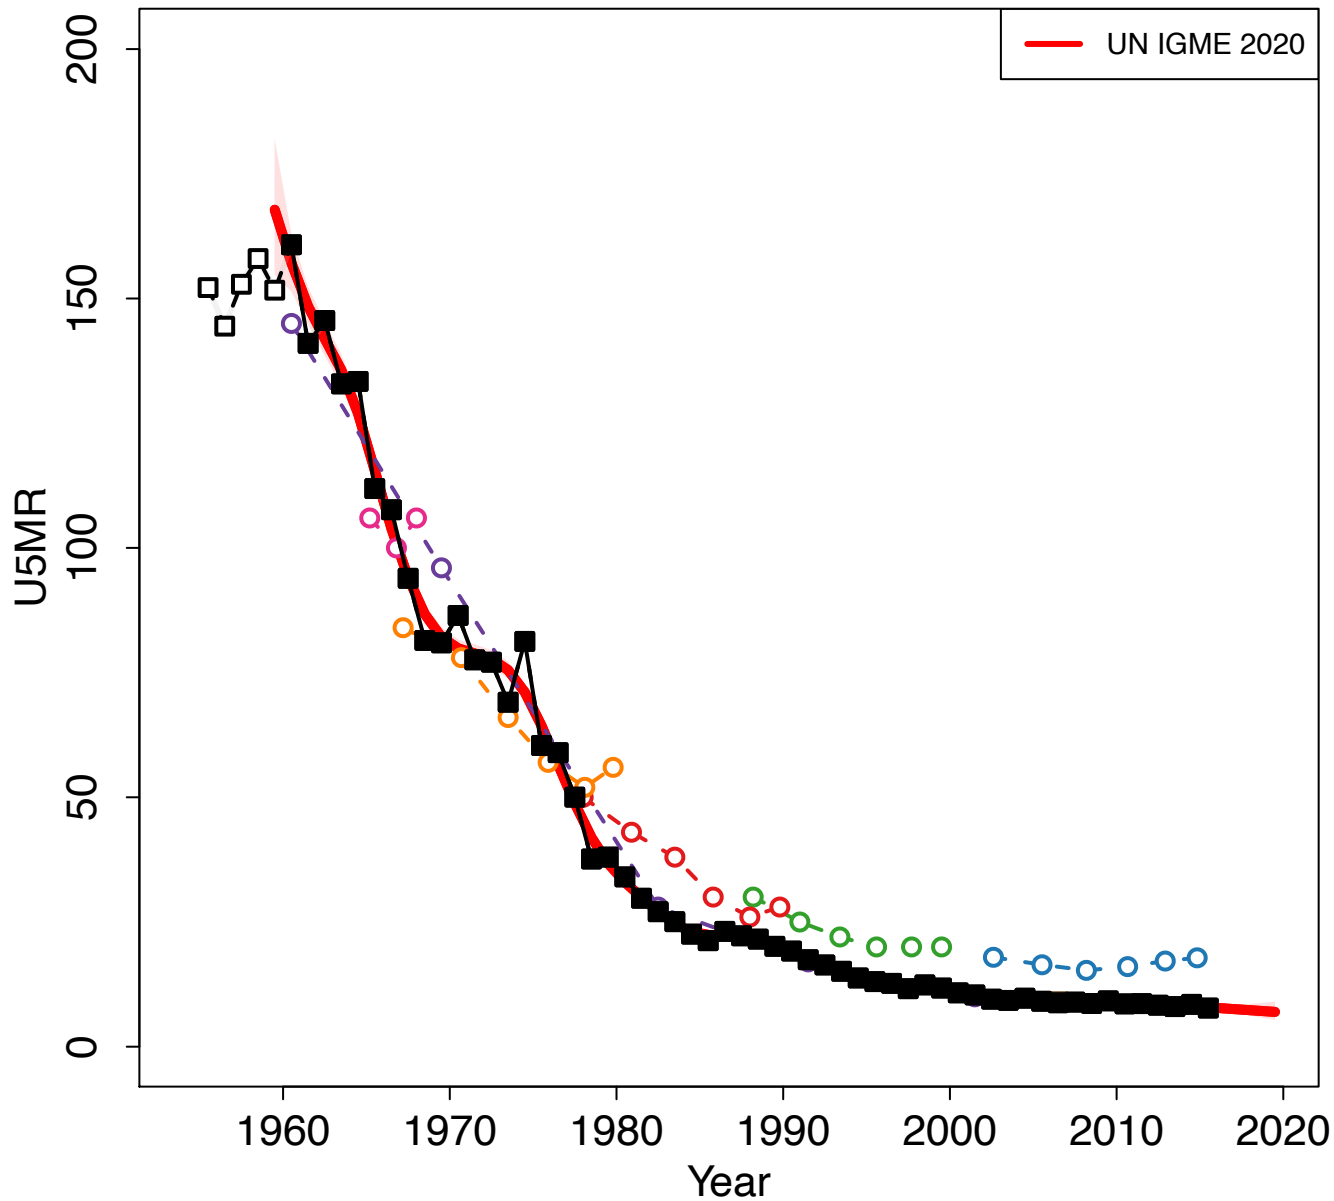

### Zoomed in

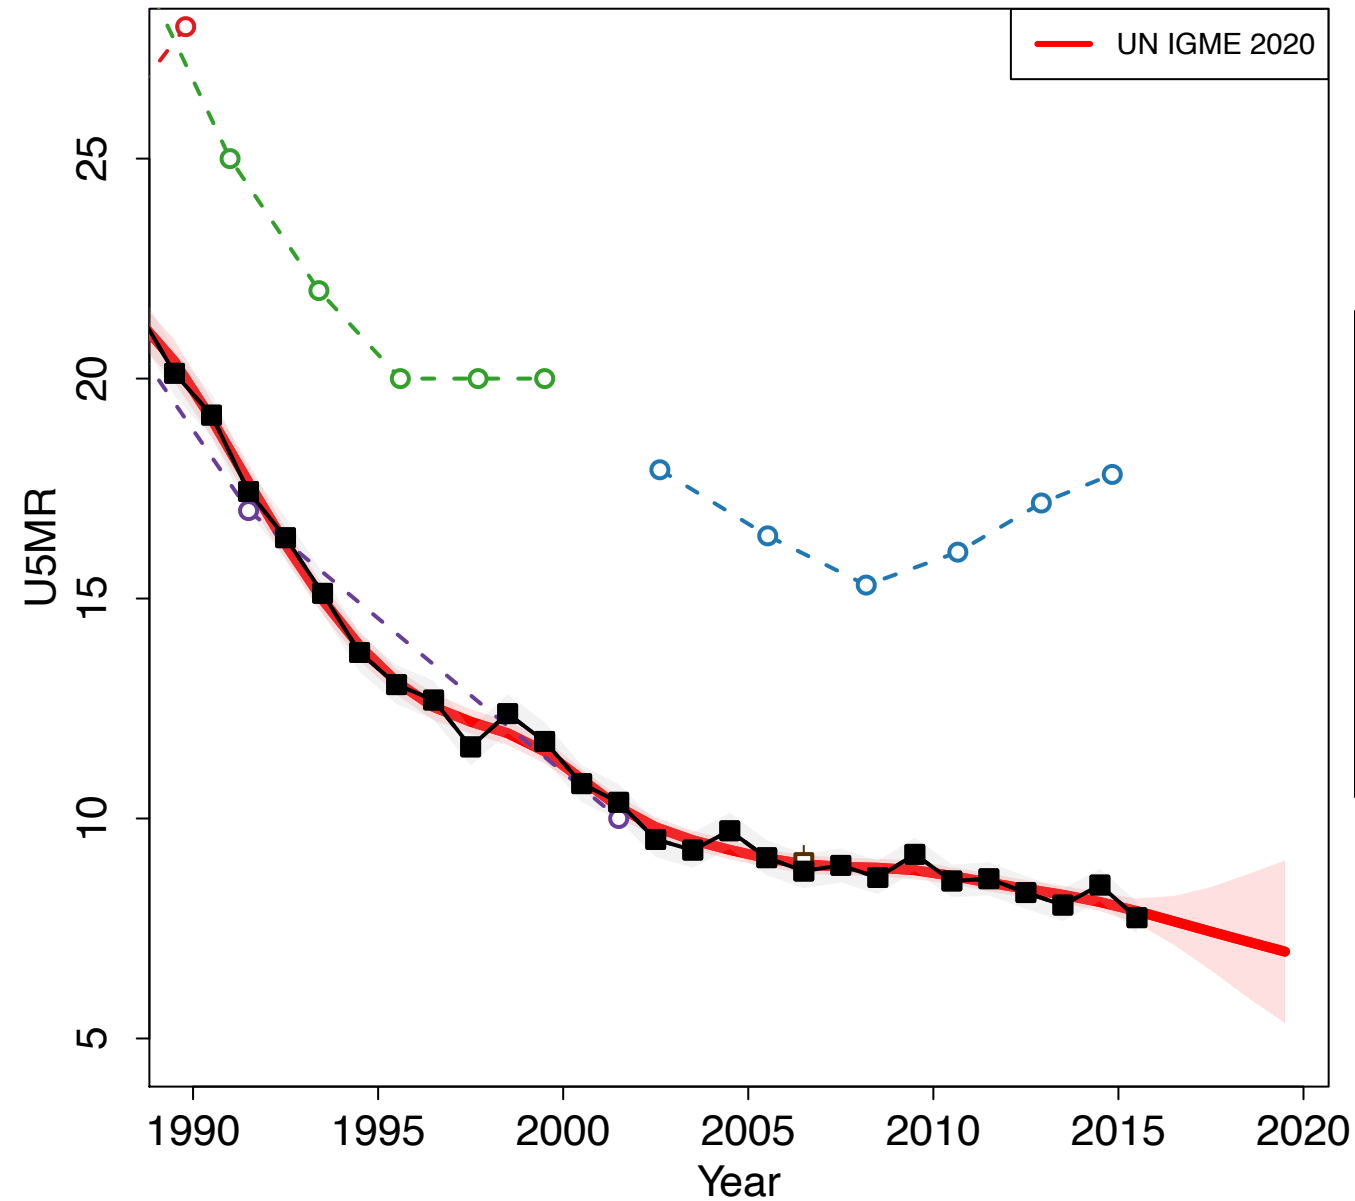

### China

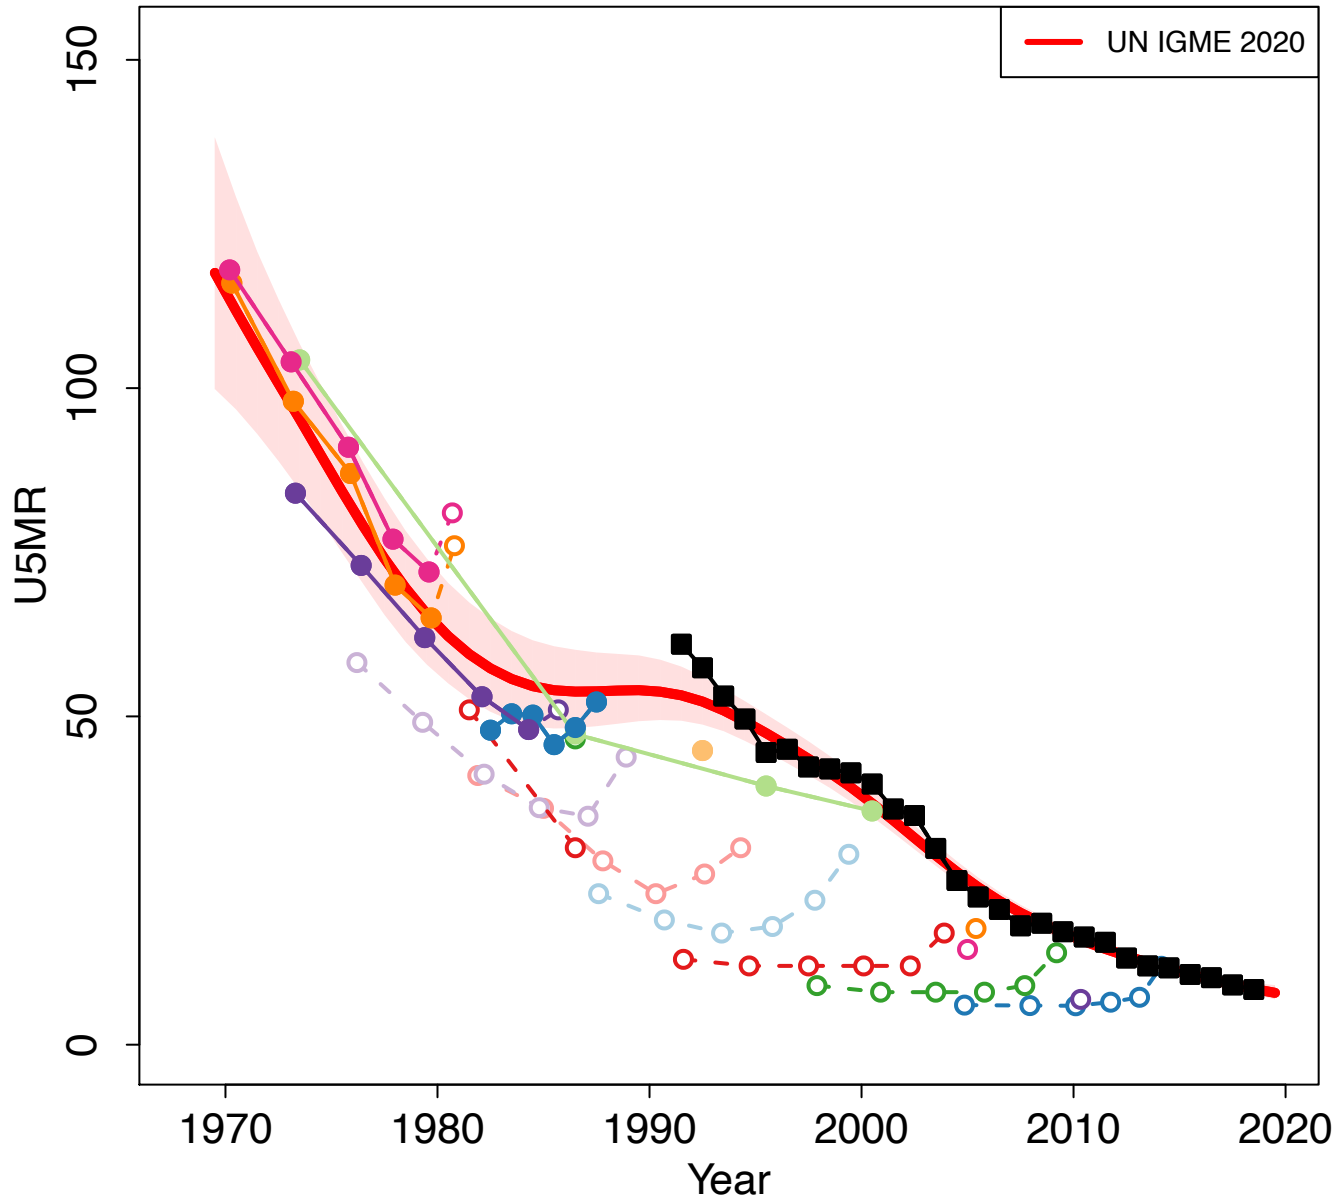

### Zoomed in

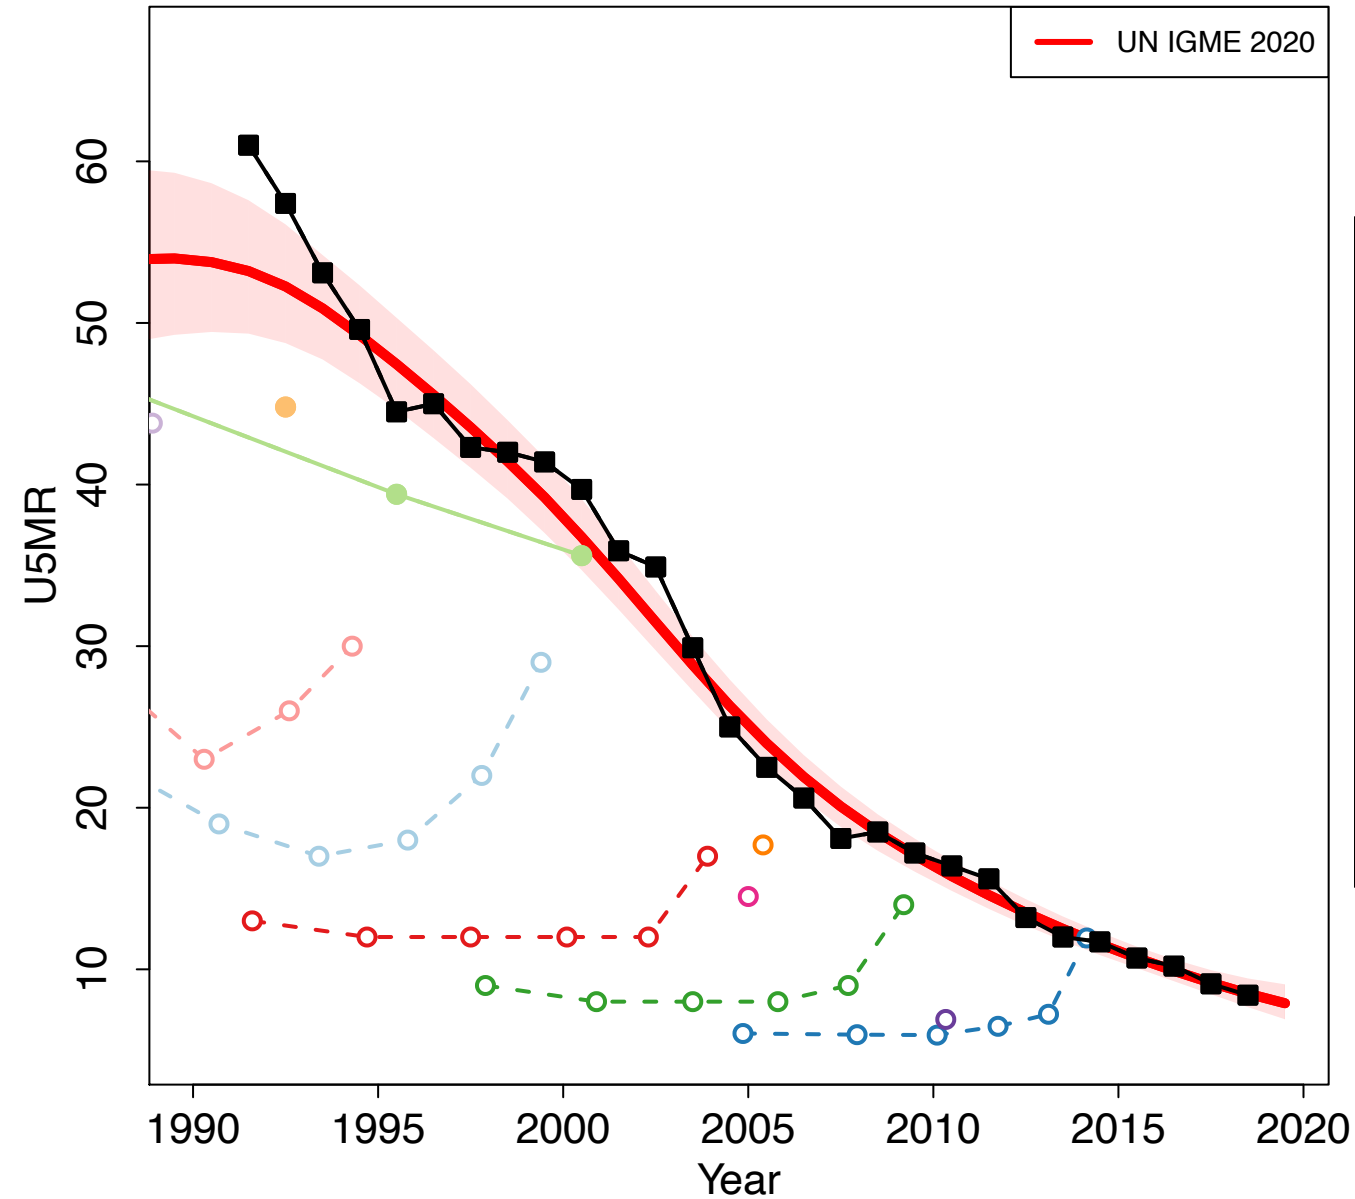

- Census 1982 (Census Indirect)
- Population Sample Survey 1982 (Others Indirect)
- National Life Tables 1986 (Others Life Table)
- Intercensal Population Sample Survey of One-Percent 1987 (Others Indirect)
- Intercensal Population Sample Survey of One-Percent 1987 (Others Household Deaths)
- National Survey on Fertility and Birth Control 1988 (Others Direct)
- Census 1990 (Census Indirect)
- Fertility Sampling Survey 1992 (Others Direct)
- Intercensal Population Sample Survey of One-Percent 1995 (Others Indirect)
- Adjusted Census Deaths 2000 (Others Household Deaths)
- Census 2000 (Census Indirect)
- National Survey on Causes of Death 2004-2005 (Others Household Deaths)
- Intercensal Population Sample Survey of One-Percent 2005 (Others Direct)
- Intercensal Population Sample Survey of One-Percent 2005 (Others Indirect)
- Census 2010 (Others Household Deaths)
- Census 2010 (Census Indirect)
- Intercensal Population Sample Survey of One-Percent 2015 (Census Indirect)
- SVR NHFPC, Death Registration Data

# Colombia

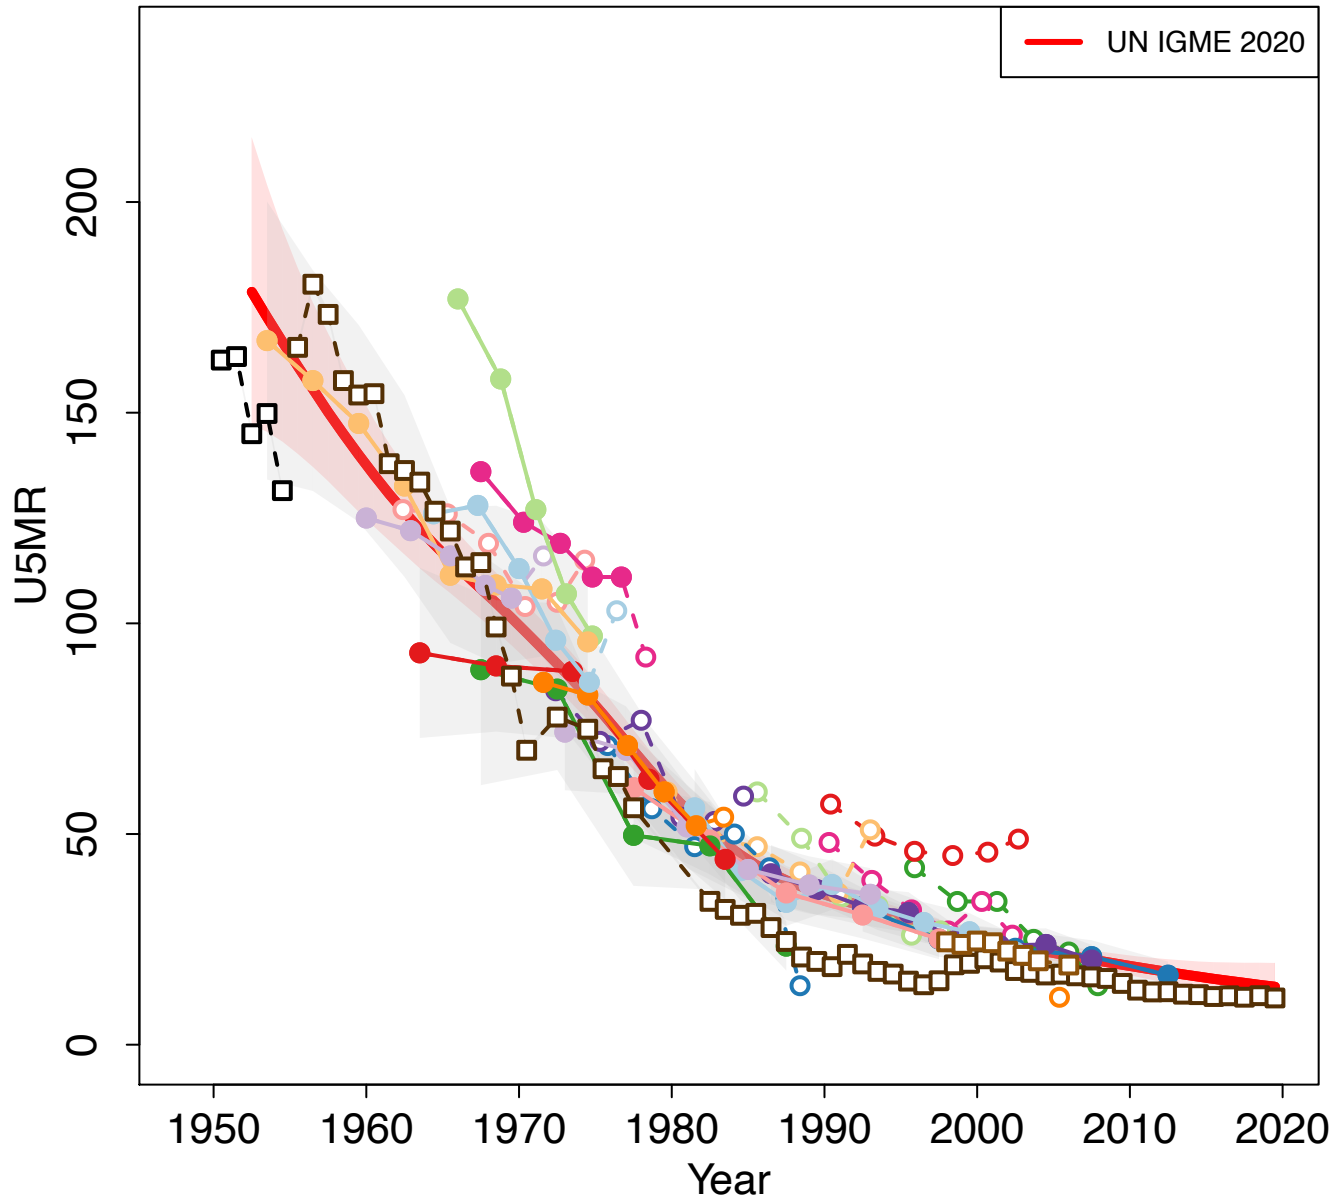

# Zoomed in

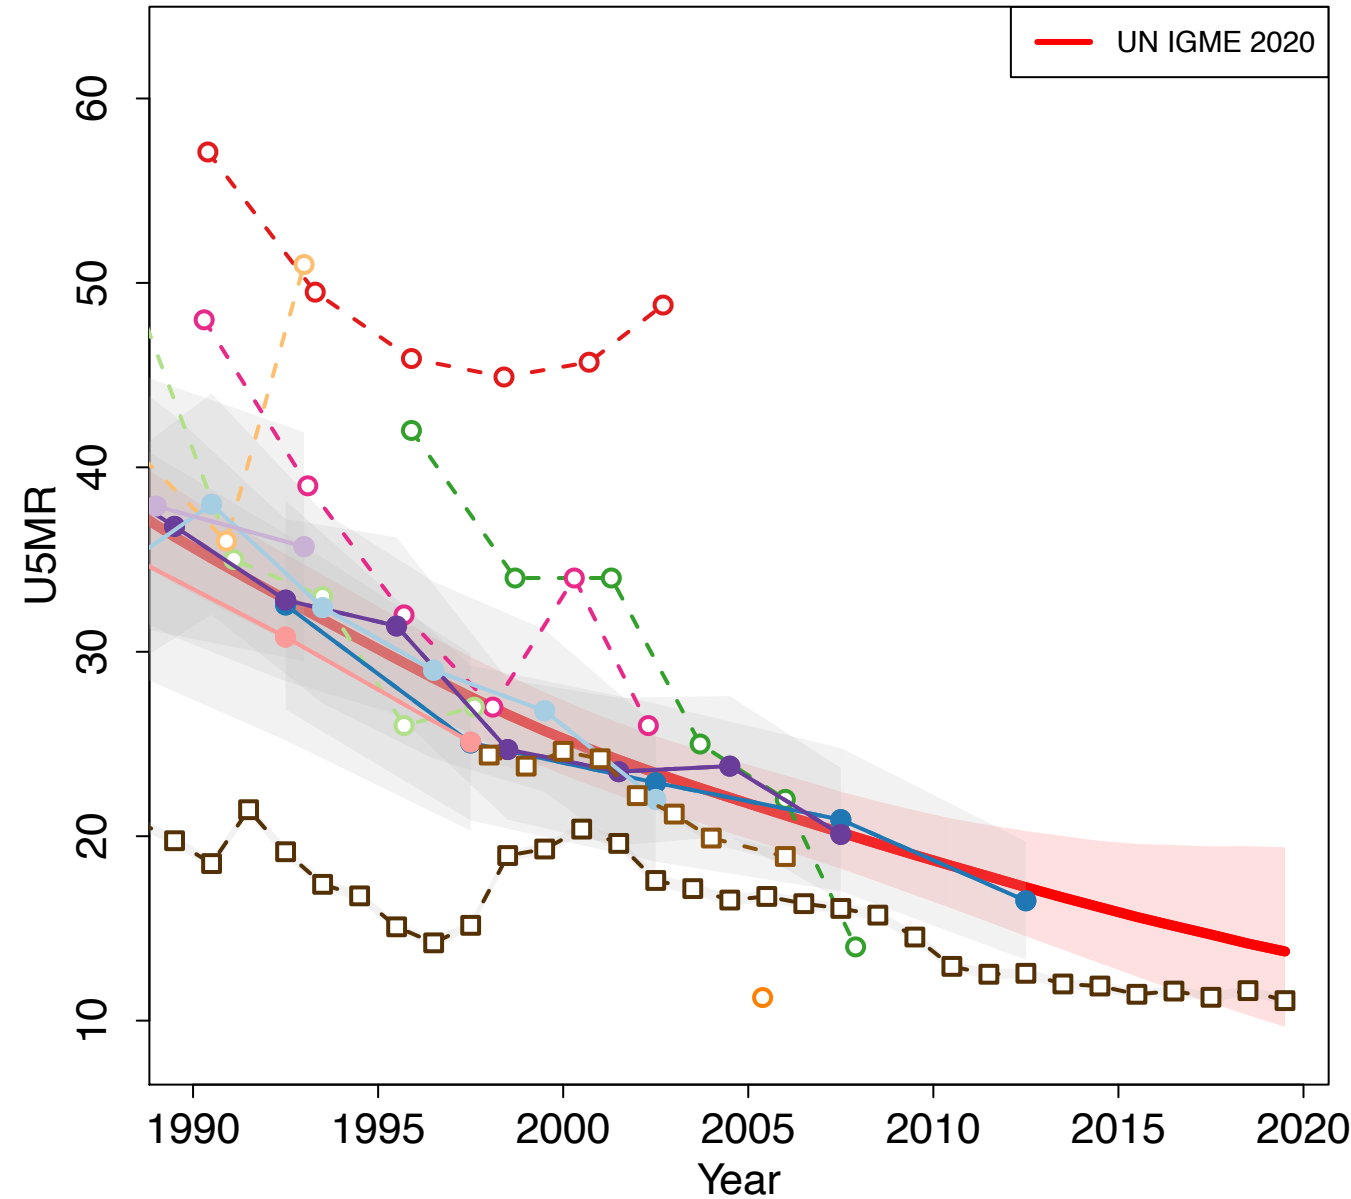

- Census 1973 (Census Indirect)
- World Fertility Survey 1976 (Other DHS Direct)
- World Fertility Survey 1976 (Other DHS Indirect)
- Contraceptive Prevalence Survey 1978 (Others Indirect)
- Household Survey (HOG) 1978 (Others Indirect)
- Household Survey (HOG) 1980 (Others Indirect)
- Census 1985 (Census Indirect)
- Demographic and Health Survey 1986 (DHS Direct)
- Demographic and Health Survey 1986 (DHS Indirect)
- Demographic and Health Survey 1990 (DHS Direct)
- Demographic and Health Survey 1990 (DHS Indirect)
- Demographic and Health Survey 1995 (DHS Direct)
- Demographic and Health Survey 1995 (DHS Indirect)
- Demographic and Health Survey 2000 (DHS Direct)
- Demographic and Health Survey 2000 (DHS Indirect)
- Demographic and Health Survey 2005 (DHS Direct)
- Demographic and Health Survey 2005 (DHS Indirect)
- Census 2005 (Others Household Deaths)
- Census 2005 (Census Indirect)
- Demographic and Health Survey 2010 (DHS Direct)
- Demographic and Health Survey 2010 (DHS Indirect)
- Demographic and Health Survey 2015 (DHS Direct)
- VR Vital Registration (Mexico March 2009)
- VR WHO
- VR UNPD Demographic Yearbook Data 2020 version

### Comoros

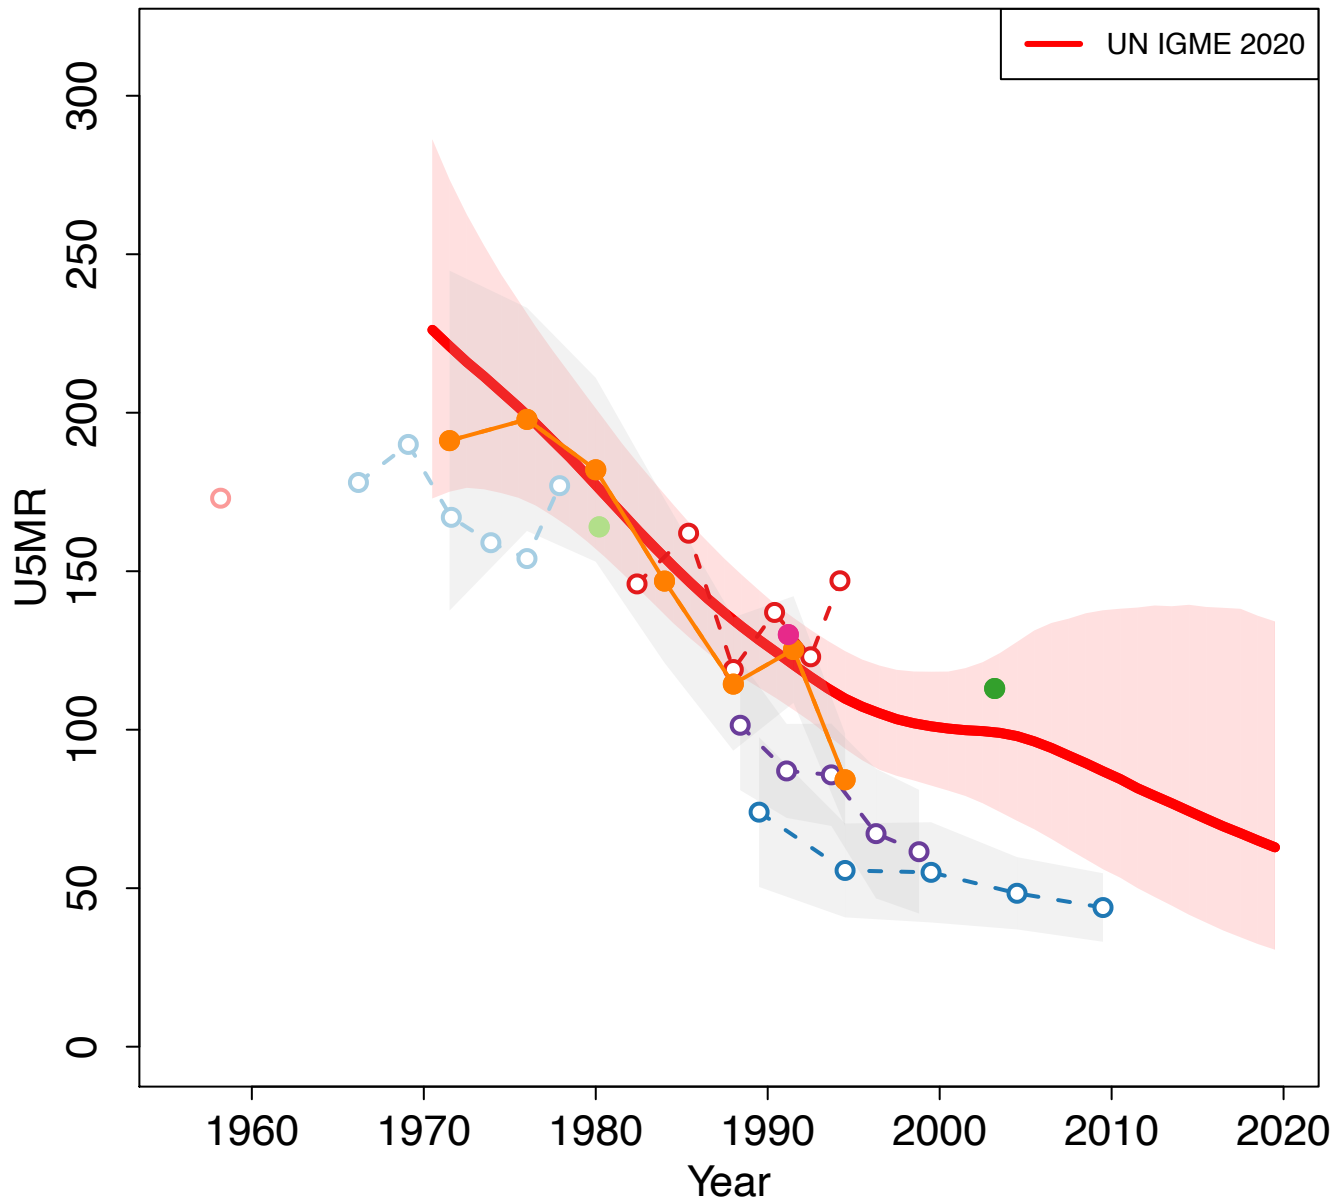

### Zoomed in

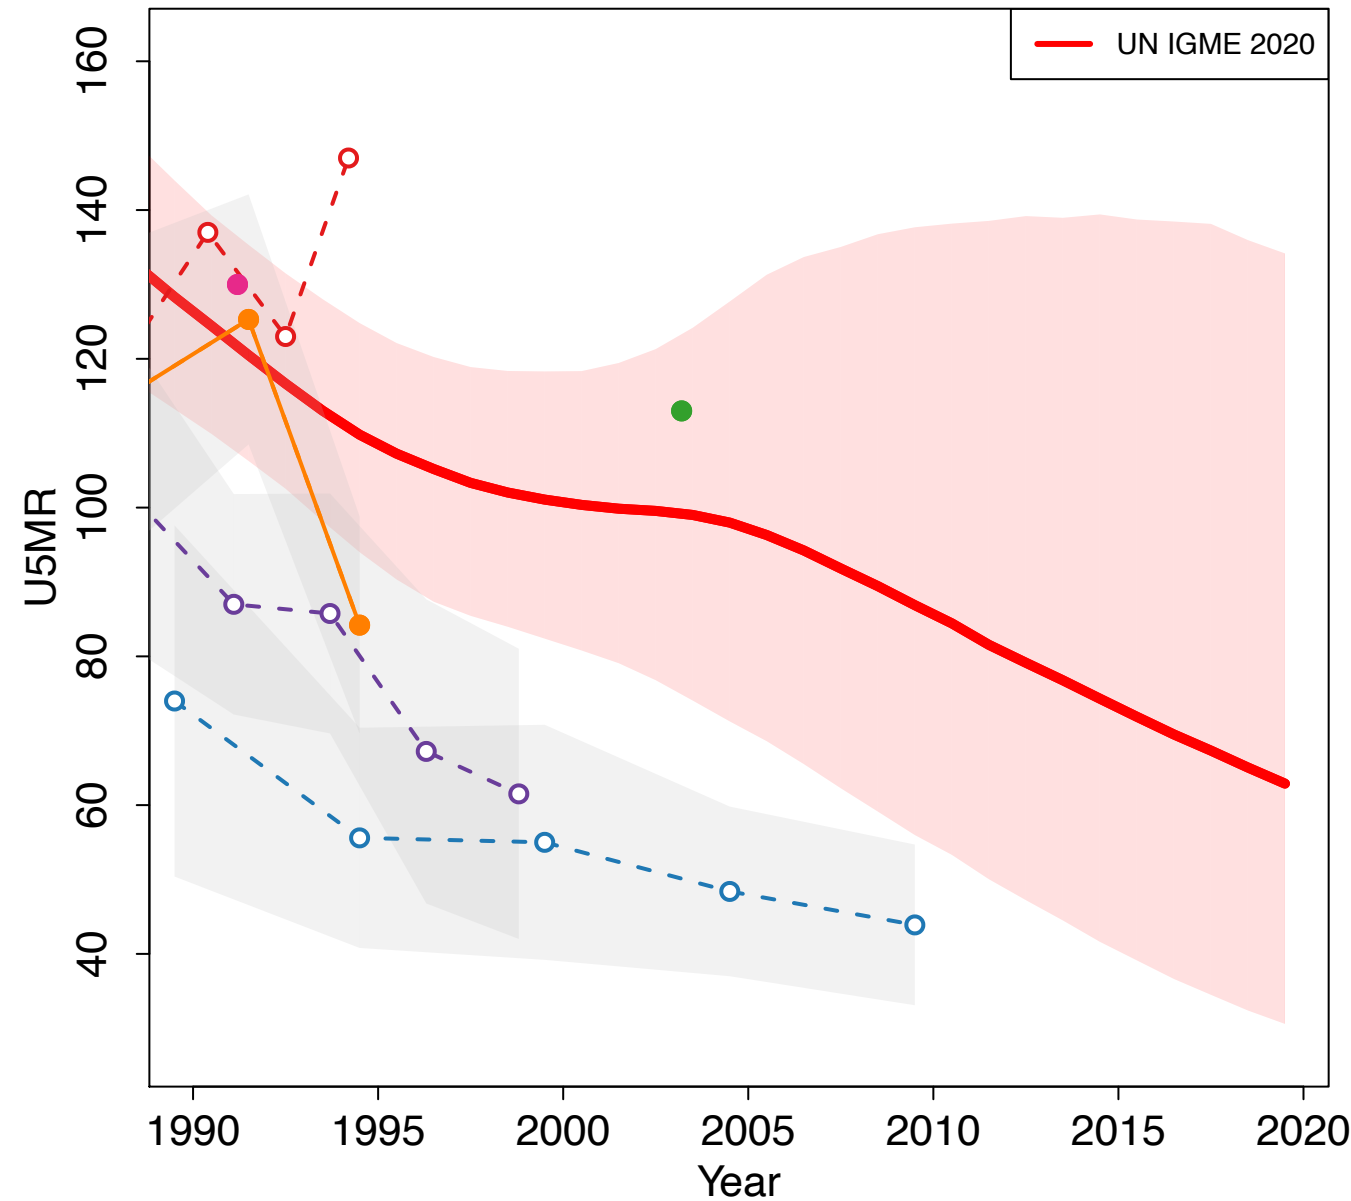

- Census 1958 (Others Household Deaths)
- Census 1980 (Others Household Deaths)
- Census 1980 (Census Indirect)
- Census 1991 (Others Household Deaths)
- Demographic and Health Survey 1996 (DHS Direct)
- Demographic and Health Survey 1996 (DHS Indirect)
- Multiple Indicator Cluster Survey 2000 (MICS Indirect)
- Census 2003 (Others Household Deaths)
- Demographic and Health Survey 2012 (DHS Direct)

### Congo

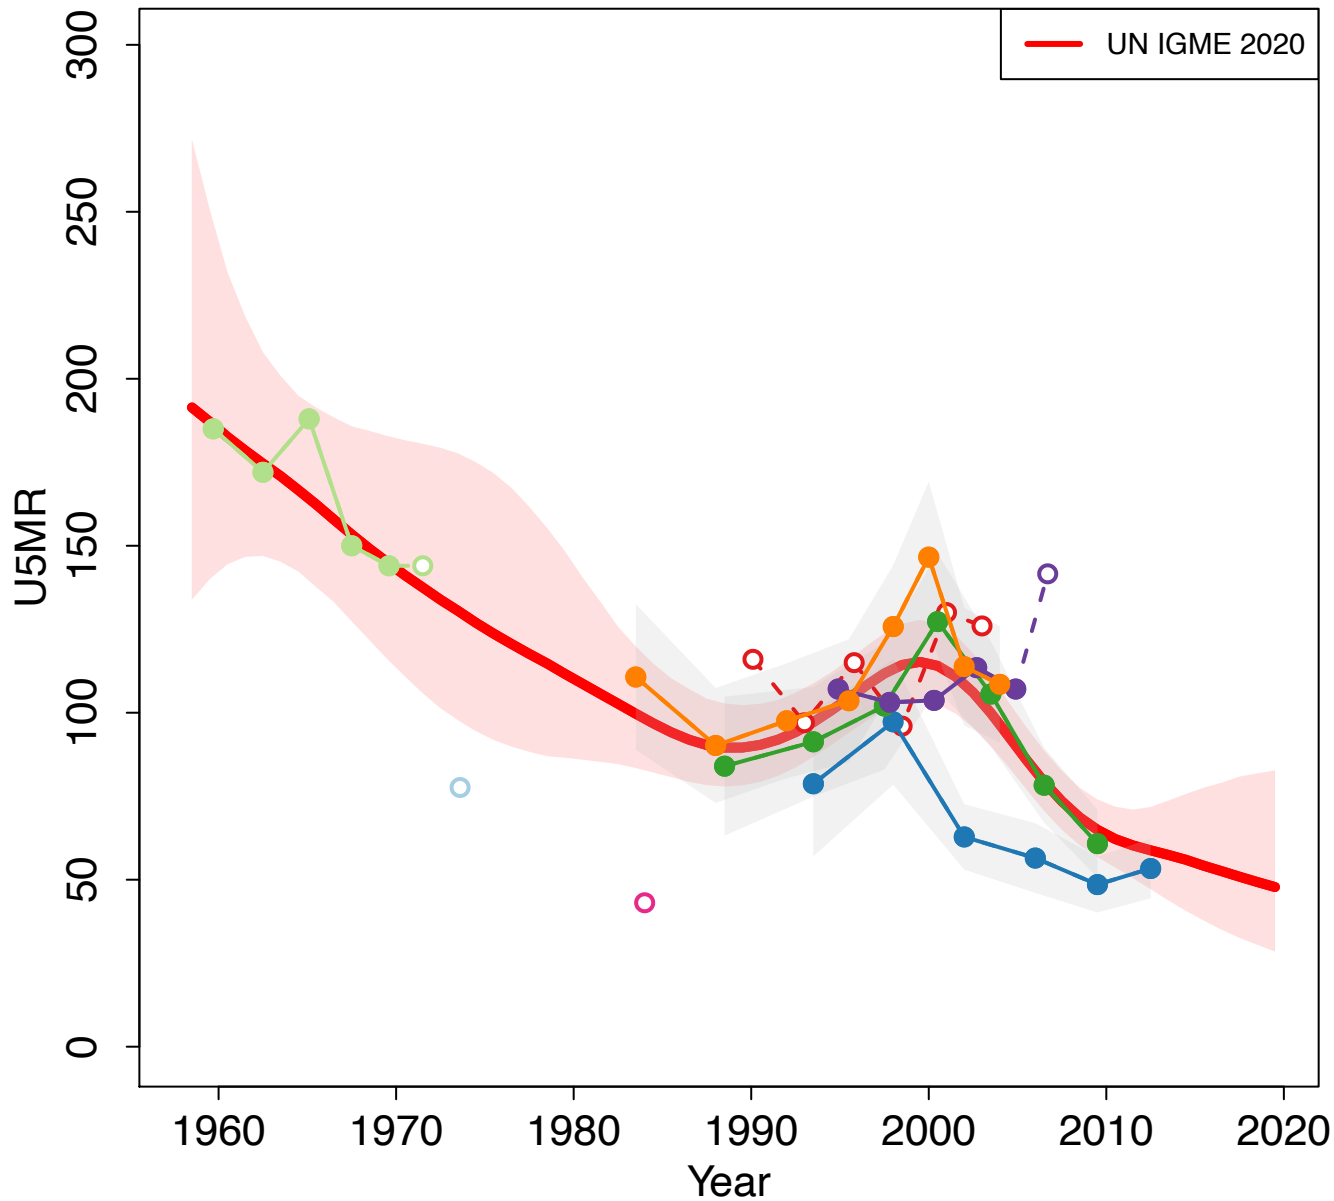

### Zoomed in

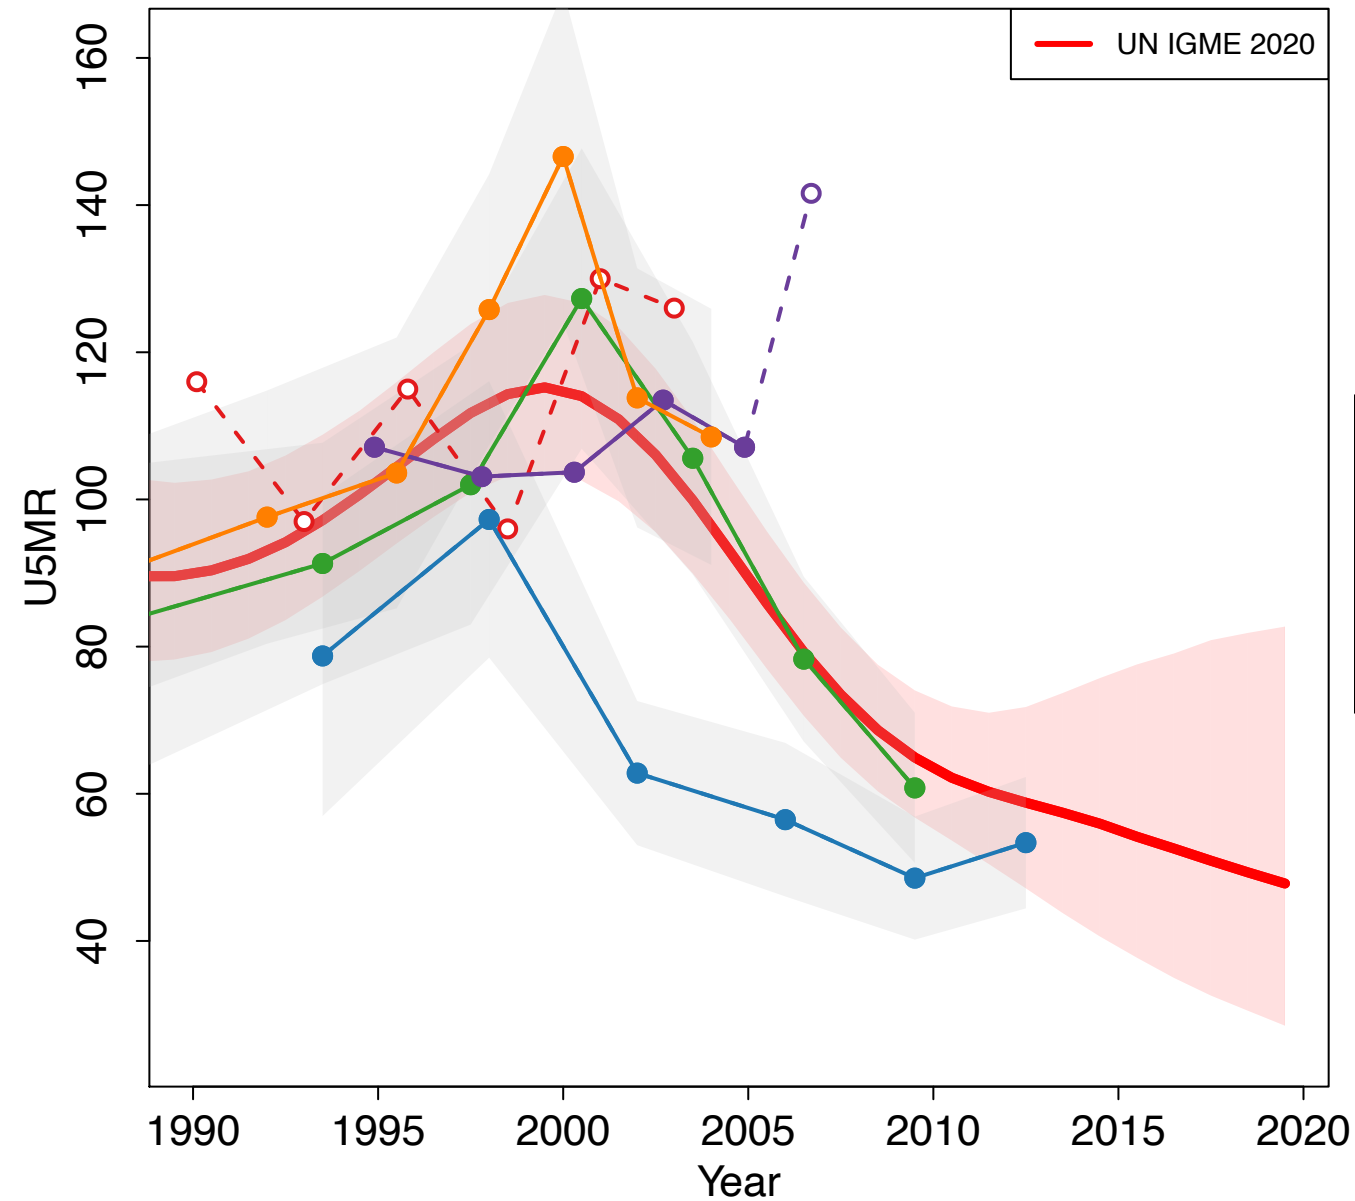



### Democratic Republic of the Congo

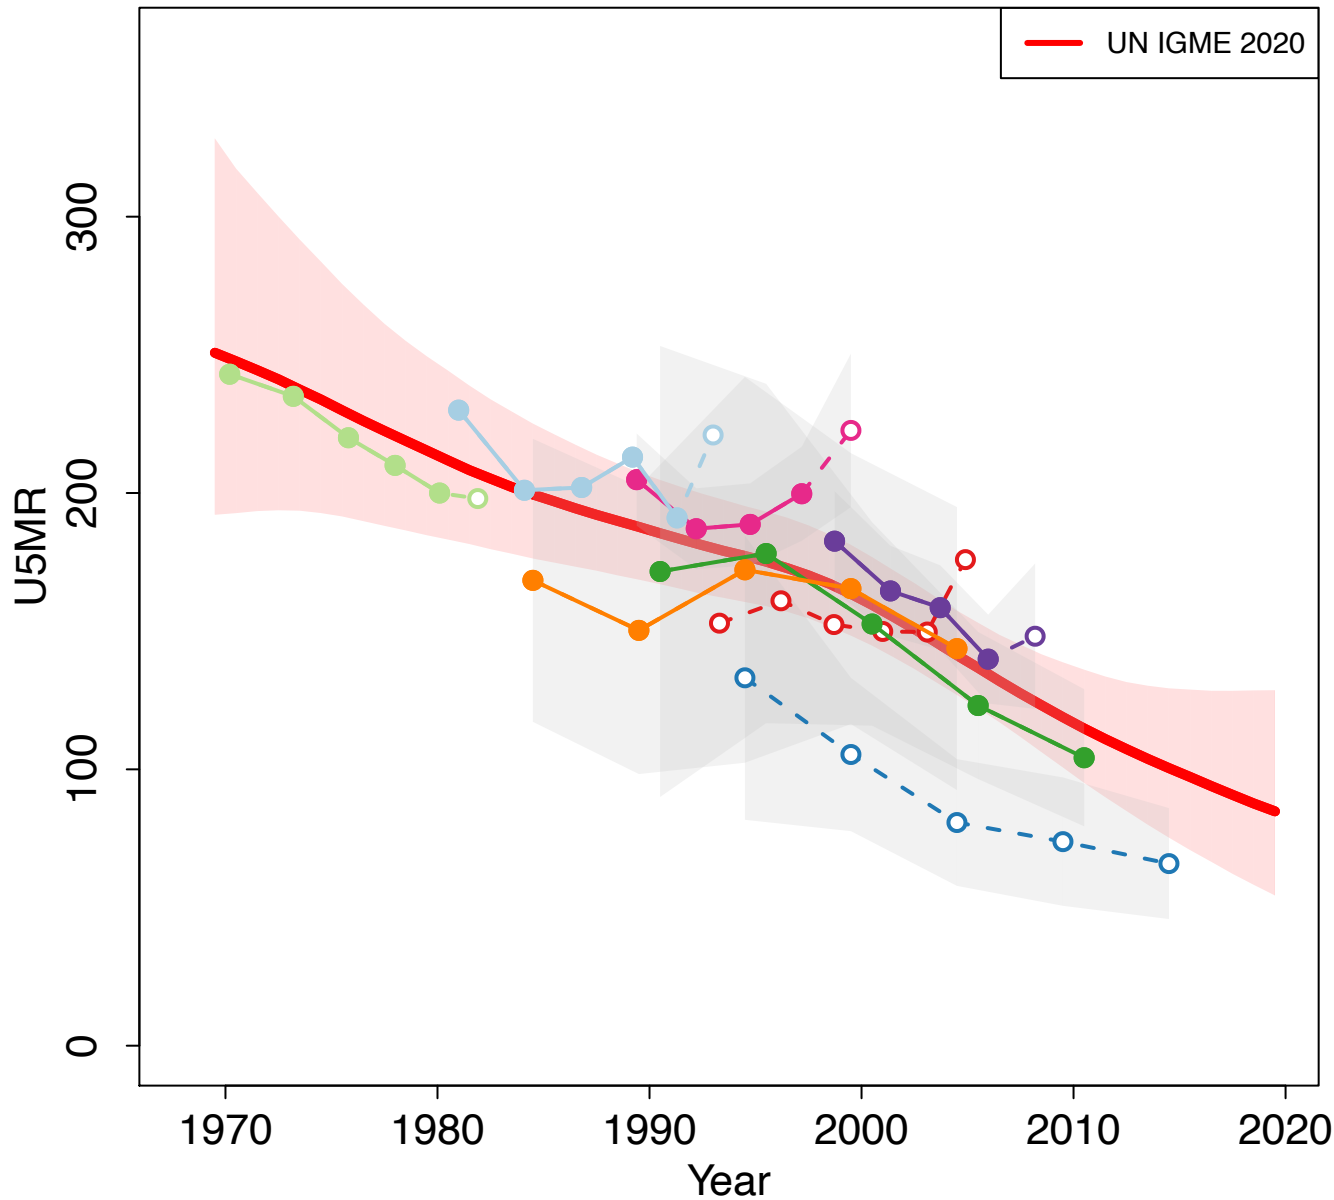

### Zoomed in

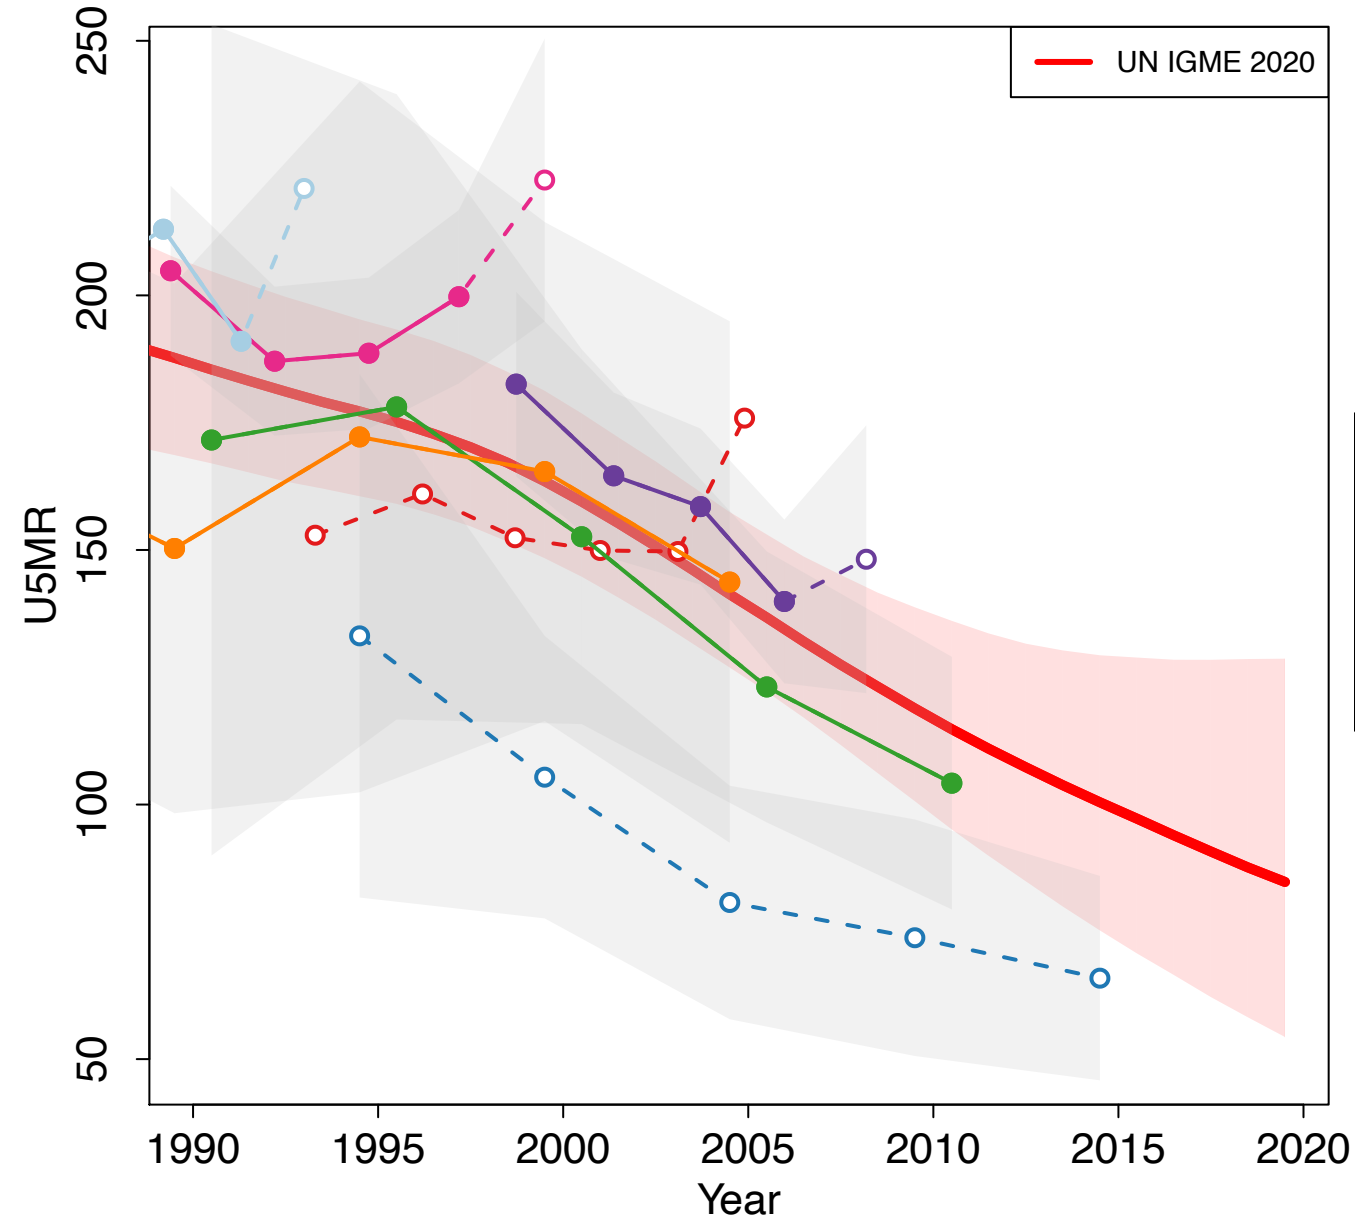

- Census 1984 (Census Indirect)
- Multiple Indicator Cluster Survey 1995 (Others Indirect)
- Multiple Indicator Cluster Survey 2001 (MICS Indirect)
- Demographic and Health Survey 2007 (DHS Direct)
- Demographic and Health Survey 2007 (DHS Indirect)
- Multiple Indicator Cluster Survey 2010 (MICS Indirect)
- Demographic and Health Survey 2013–2014 (DHS Direct)
- Multiple Indicator Cluster Survey 2017–2018 (MICS Direct)

### Cook Islands

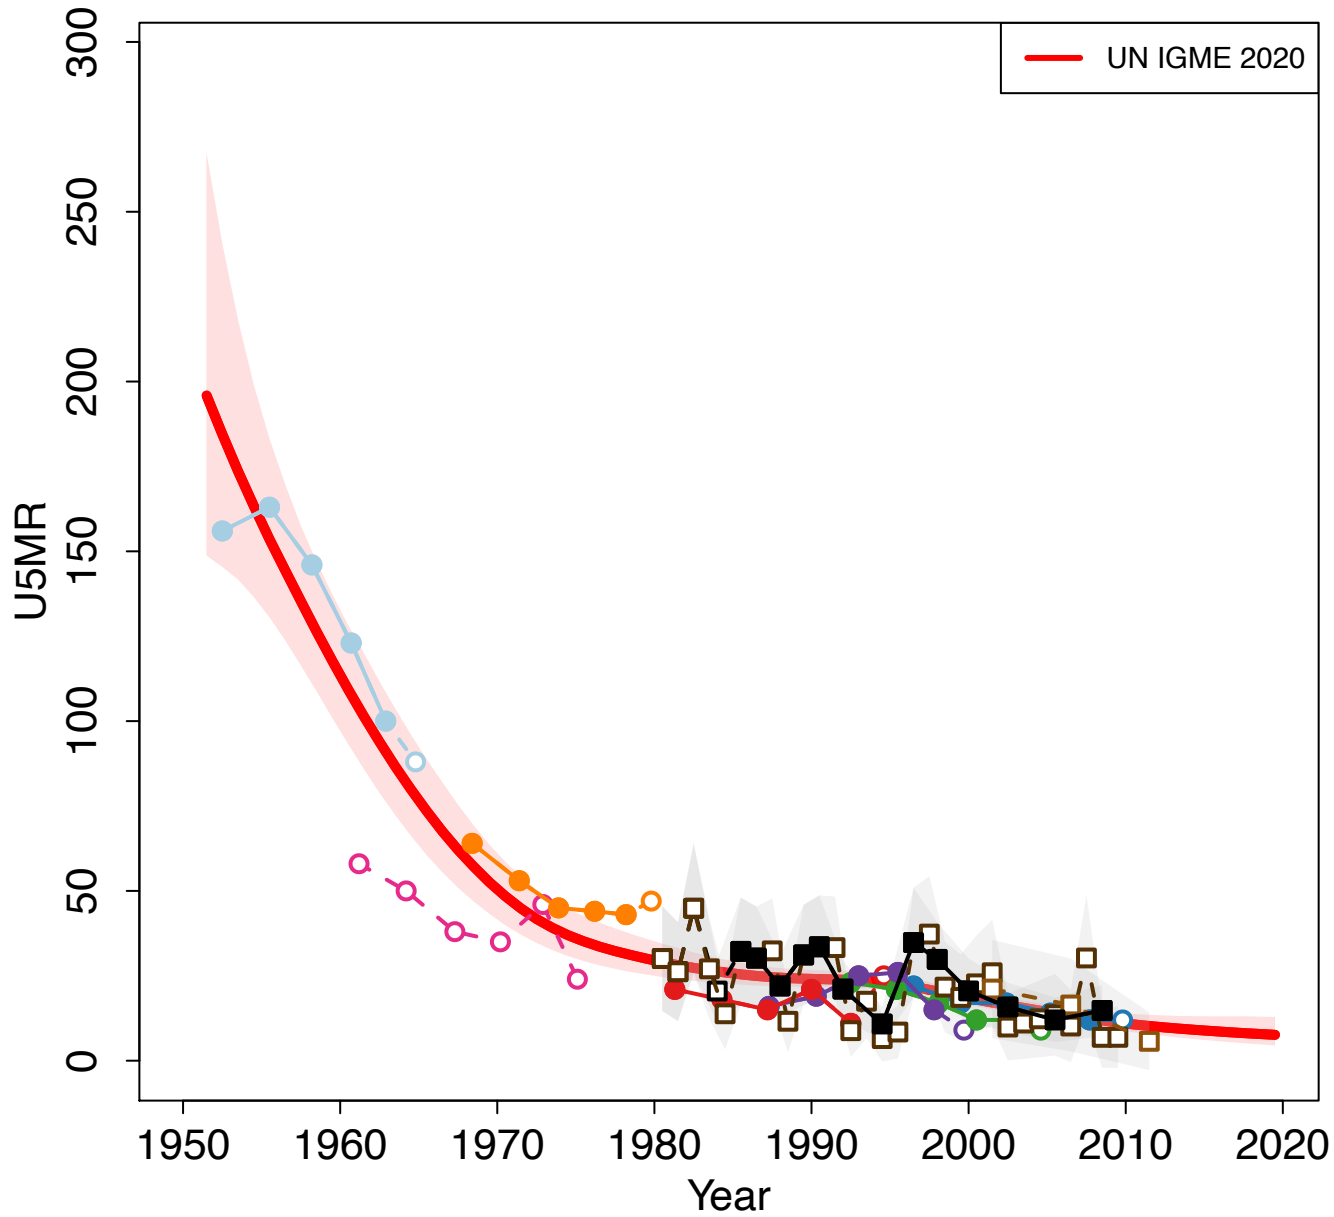

### Zoomed in

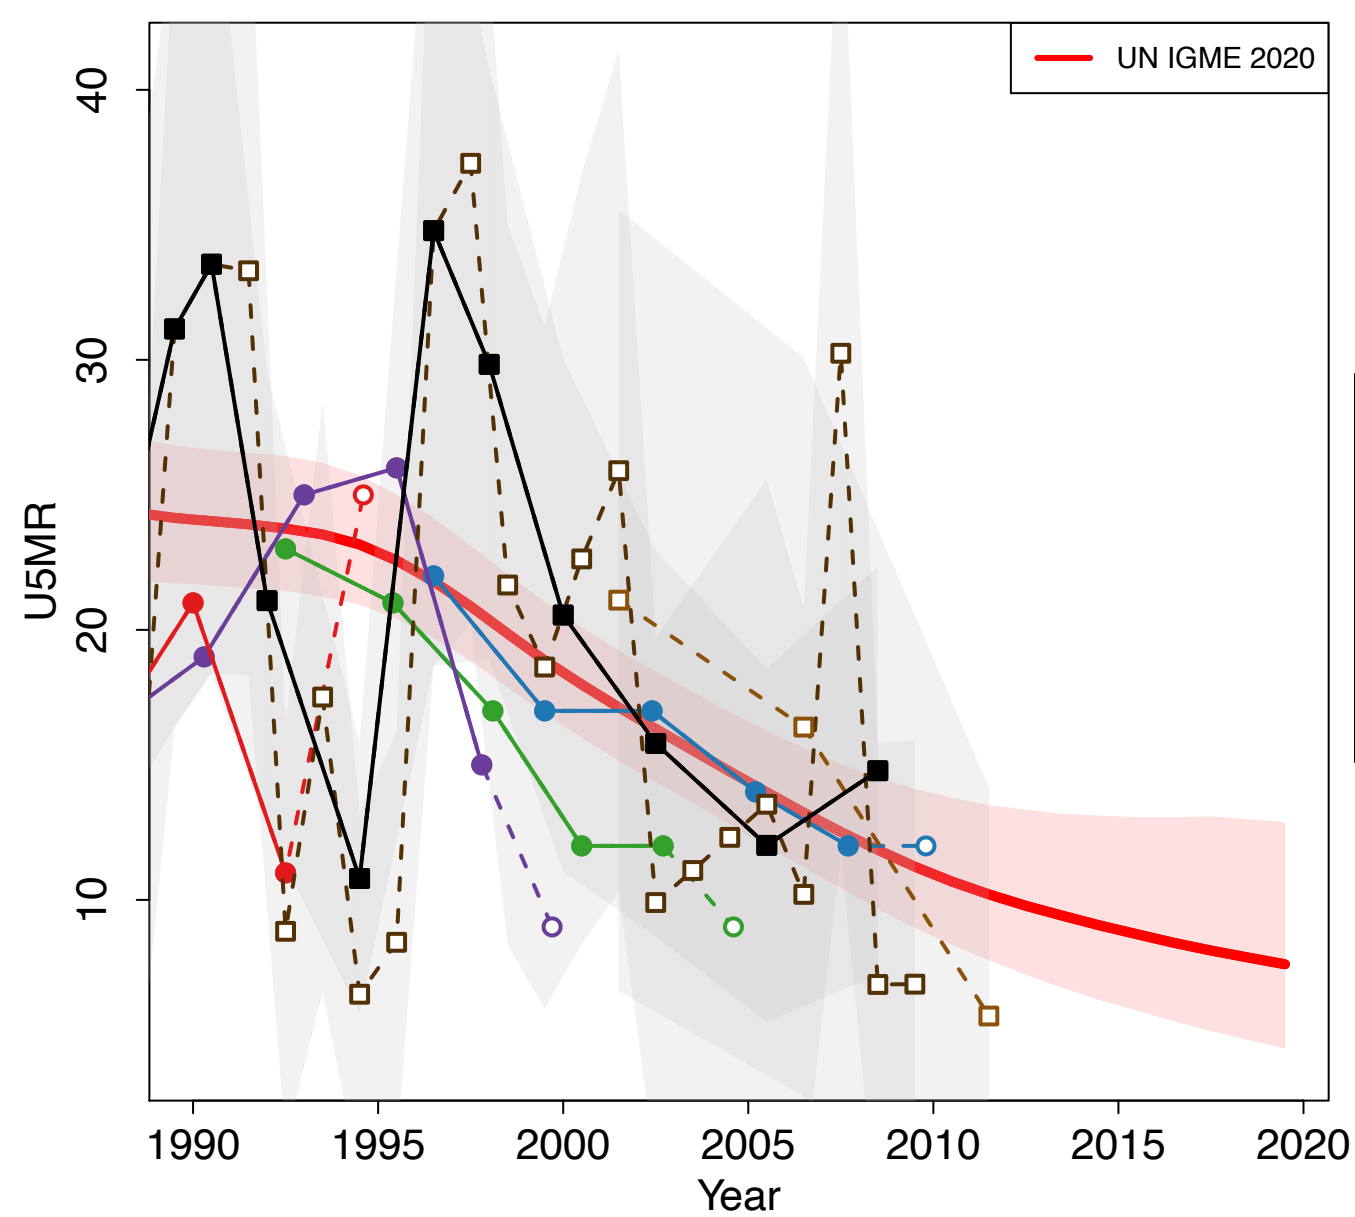

### Costa Rica

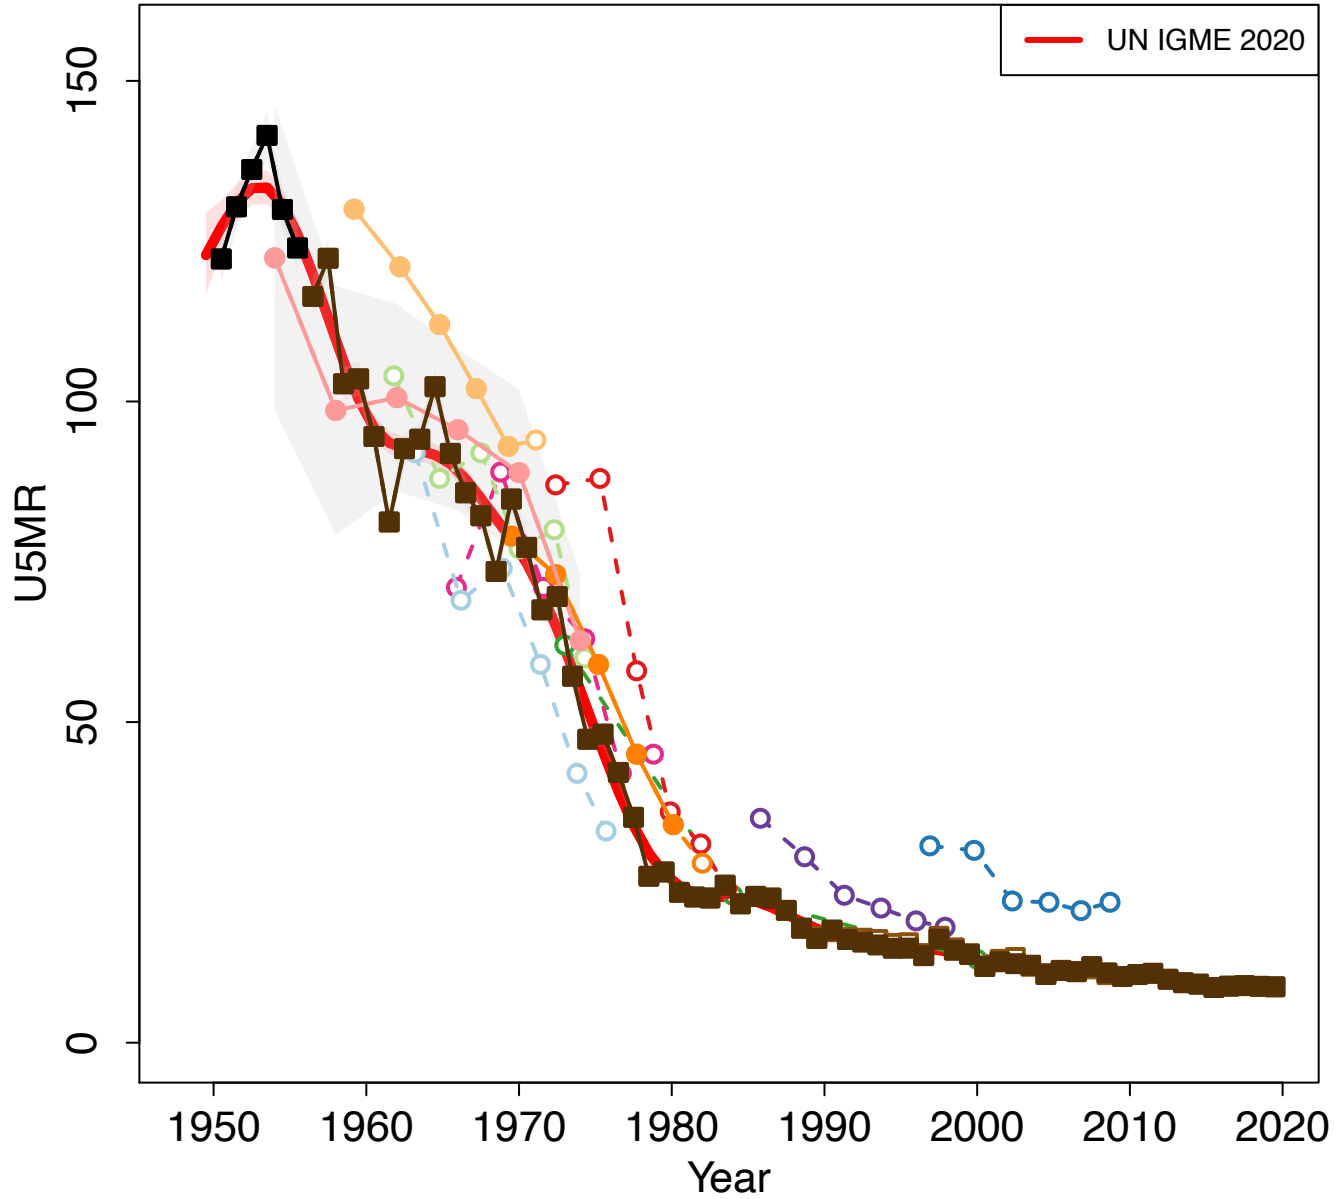

### Zoomed in

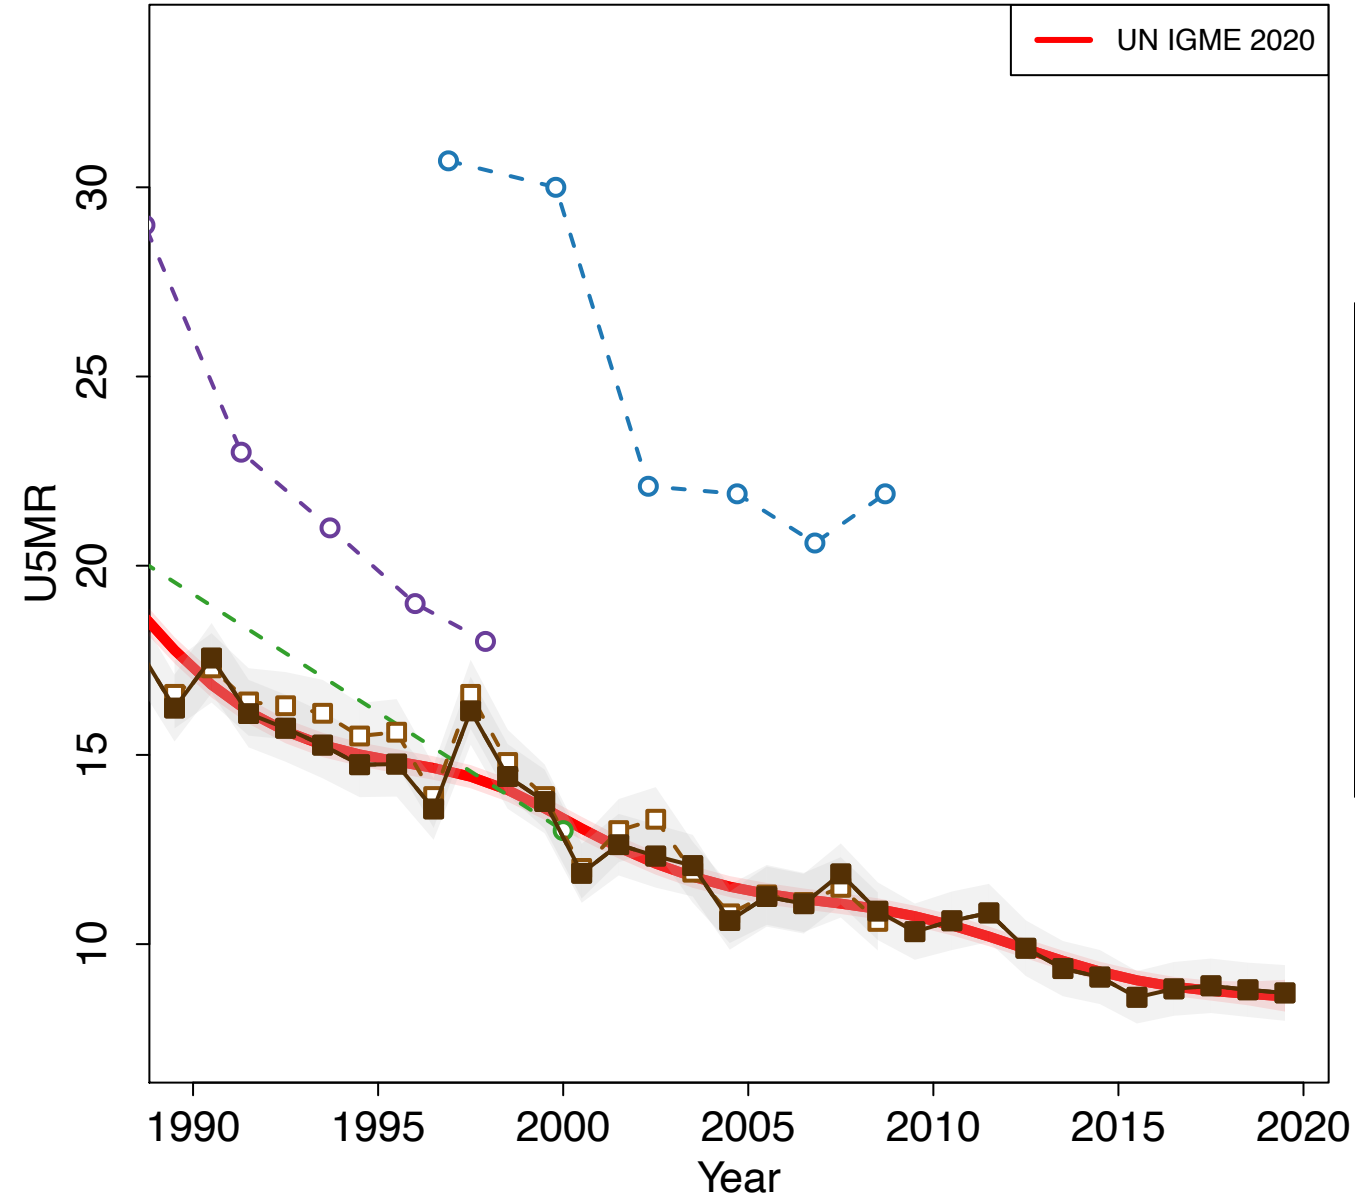

- Census 1973 (Census Indirect)
- World Fertility Survey 1976 (Other DHS Direct)
- National Fertility Survey 1976 (Other DHS Indirect)
- Contraceptive Prevalence Survey 1978 (Others Indirect)
- Contraceptive Prevalence Survey 1981 (Others Indirect)
- Census 1984 (Census Indirect)
- National Survey of Fertility and Health 1986 (Others Indirect)
- Census 2000 (Census Indirect)
- TABLAS DE VIDA NACIONALES 2000 (Others Life Table)
- Census 2011 (Census Indirect)
- VR Vital Registration (Mexico March 26, Roberto)
- VR WHO
- VR UNPD Demographic Yearbook Data 2020 version

### Cote d'Ivoire

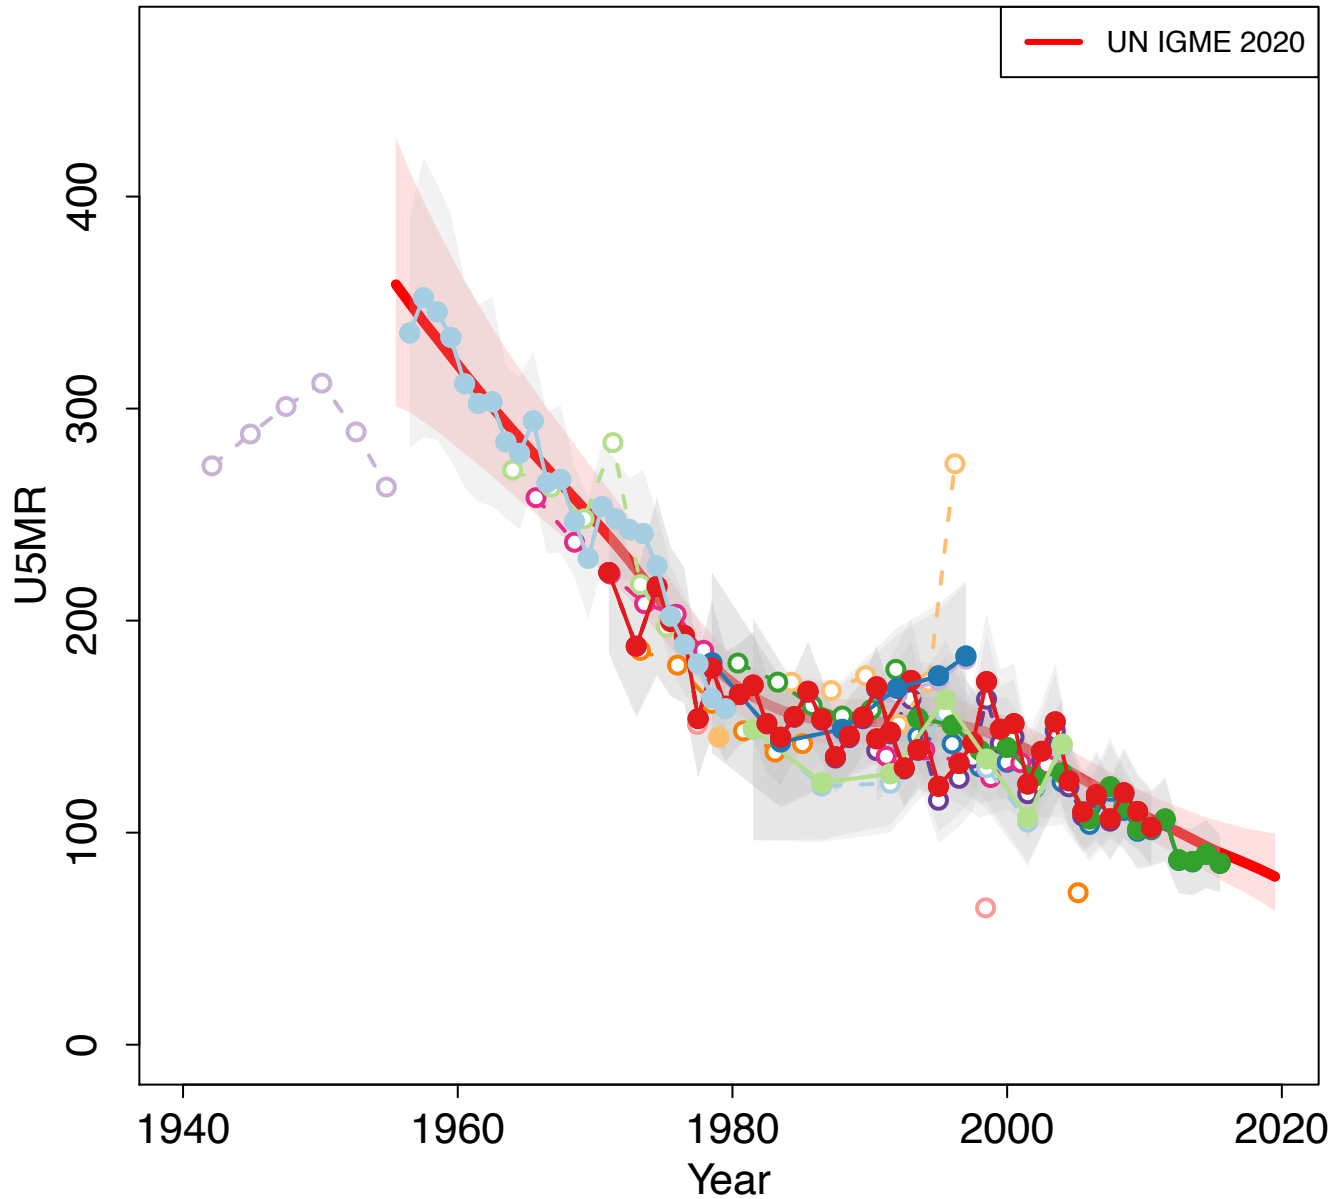

### Zoomed in

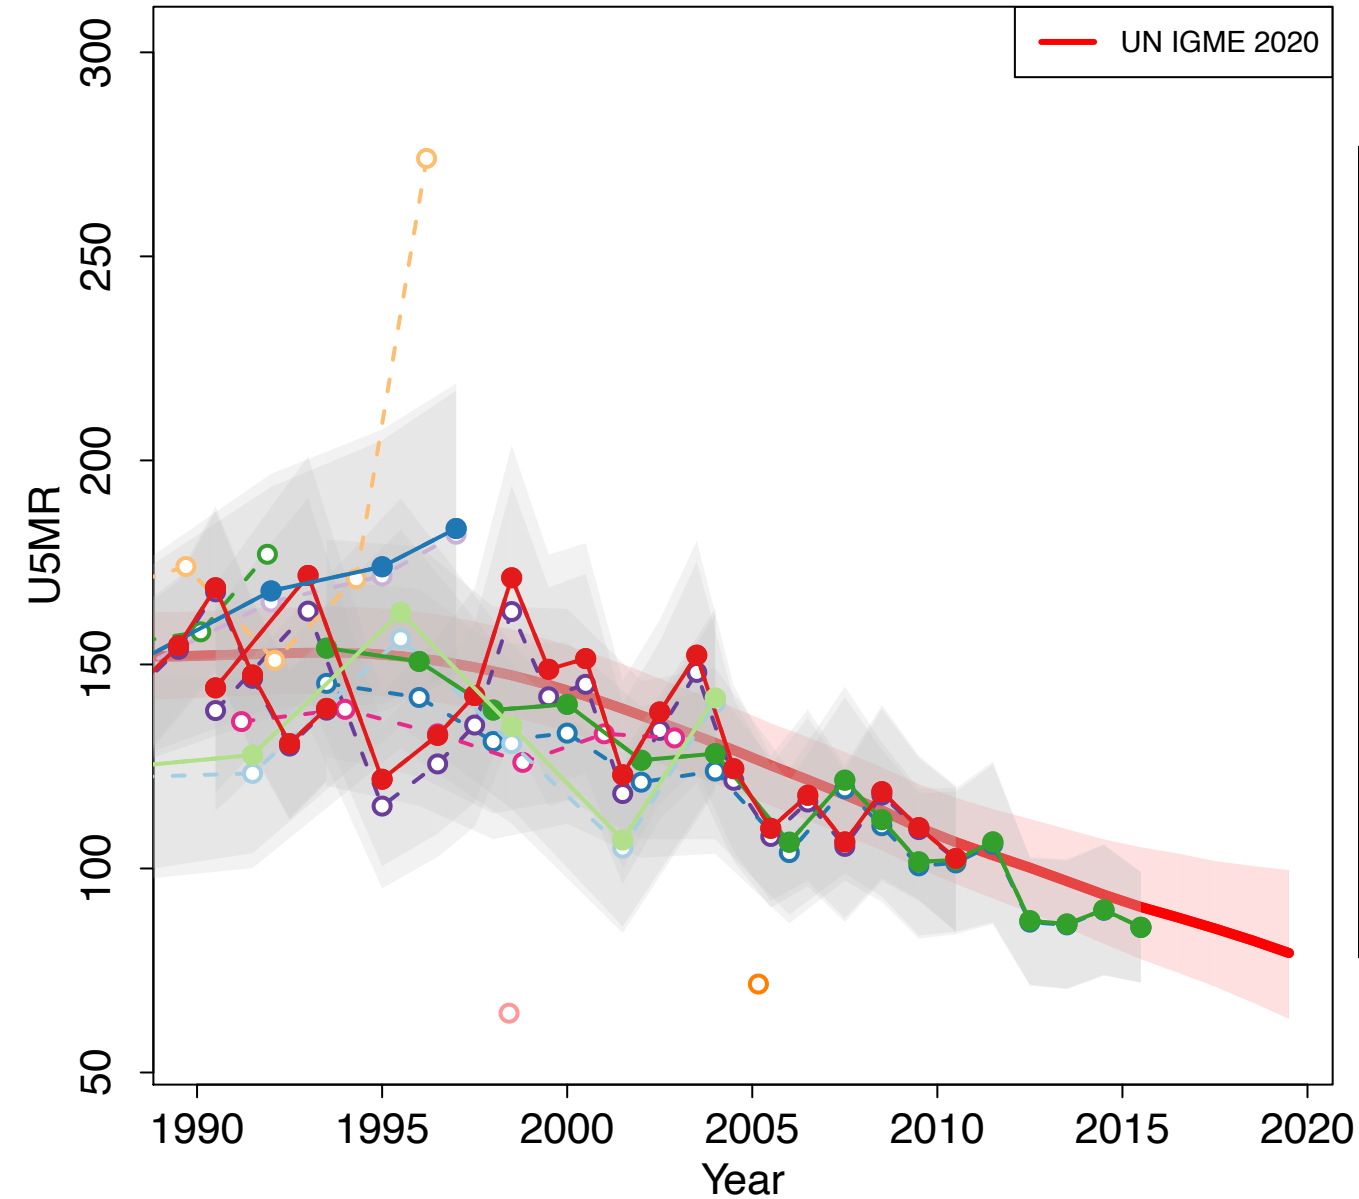

- Survey 1957–1958 (Others Indirect)
- Demographic Survey Repeated Passages 1978–1979 (Others Direct)
- Demographic Survey Repeated Passages 1978–1979 (Others Household Deaths)
- Demographic Survey Repeated Passages 1978–1979 (Others Indirect)
- World Fertility Survey 1980–1981 (Other DHS Direct)
- World Fertility Survey 1980–1981 (Other DHS Indirect)
- Census 1988 (Census Indirect)
- Demographic and Health Survey (MM adjusted) 1994 (DHS Direct)
- Demographic and Health Survey 1994 (DHS Direct)
- Demographic and Health Survey 1994 (DHS Indirect)
- Demographic and Health Survey (MM adjusted) 1998–1999 (DHS Direct)
- Demographic and Health Survey 1998–1999 (DHS Direct)
- Demographic and Health Survey 1998–1999 (DHS Indirect)
- Census 1998 (Others Household Deaths)
- AIDS Indicator Survey (MM adjusted) 2005 (Other DHS Direct)
- AIDS Indicator Survey 2005 (Other DHS Direct)
- AIDS Indicator Survey 2005 (Other DHS Indirect)
- AIDS Indicator Survey 2005 (Others Household Deaths)
- Demographic and Health Survey (MM adjusted) 2011–2012 (DHS Direct)
- Demographic and Health Survey 2011–2012 (DHS Direct)
- Multiple Indicator Cluster Survey (MM adjusted) 2016 (MICS Direct)
- Multiple Indicator Cluster Survey 2016 (MICS Direct)

### Croatia

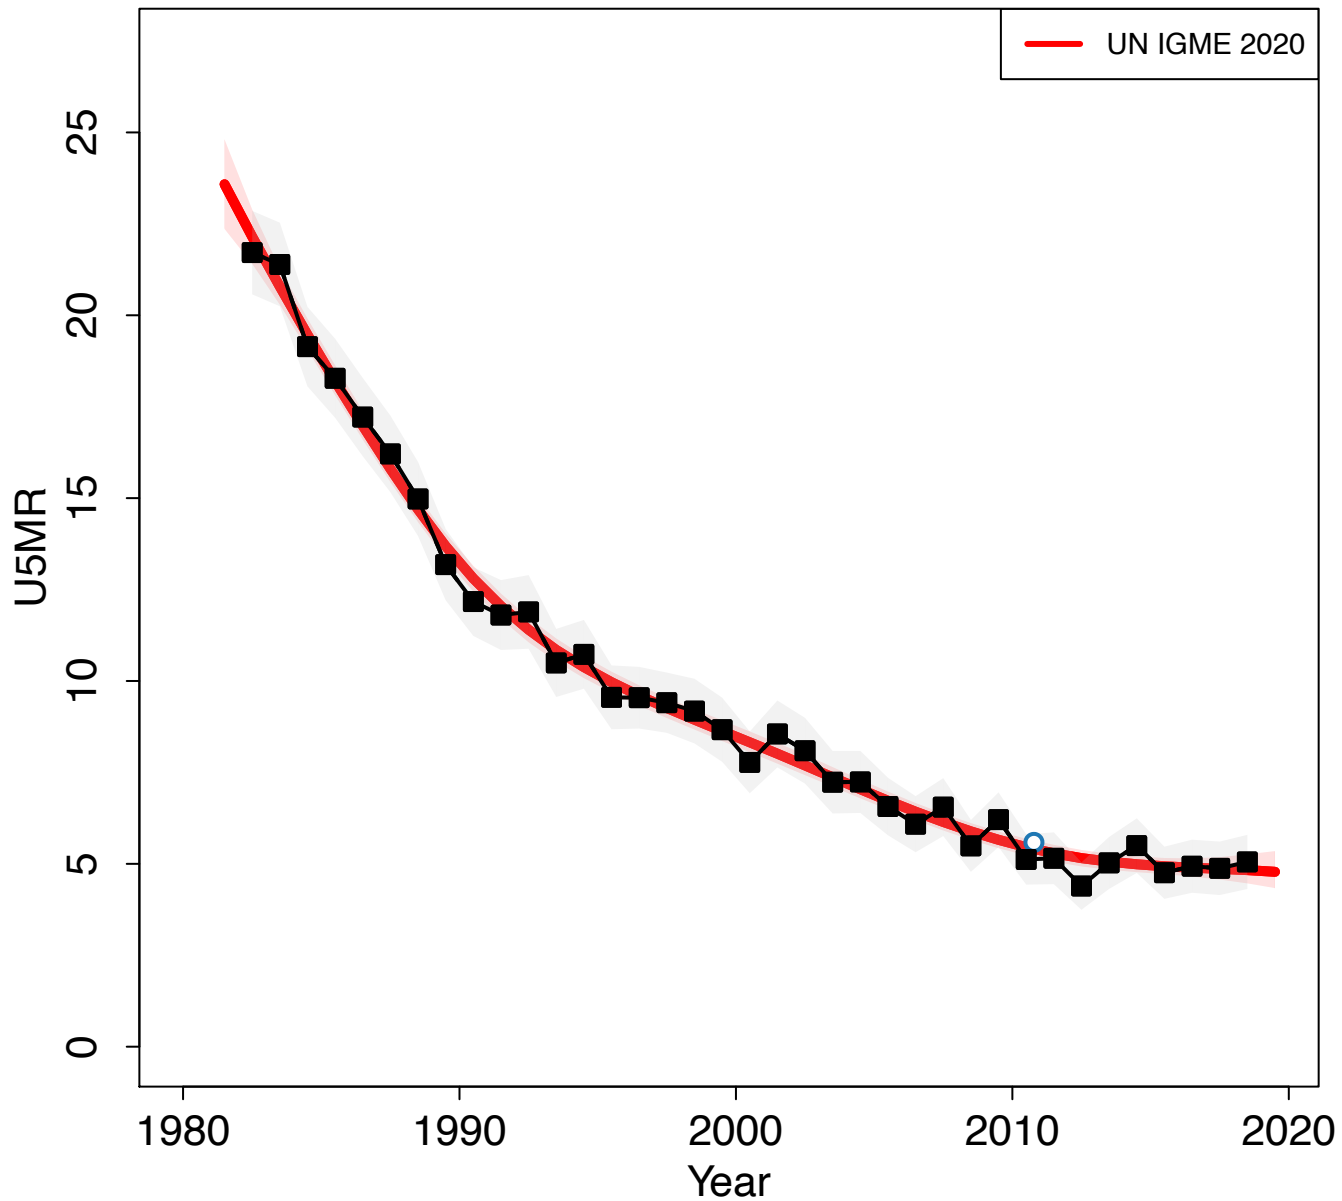

### Zoomed in

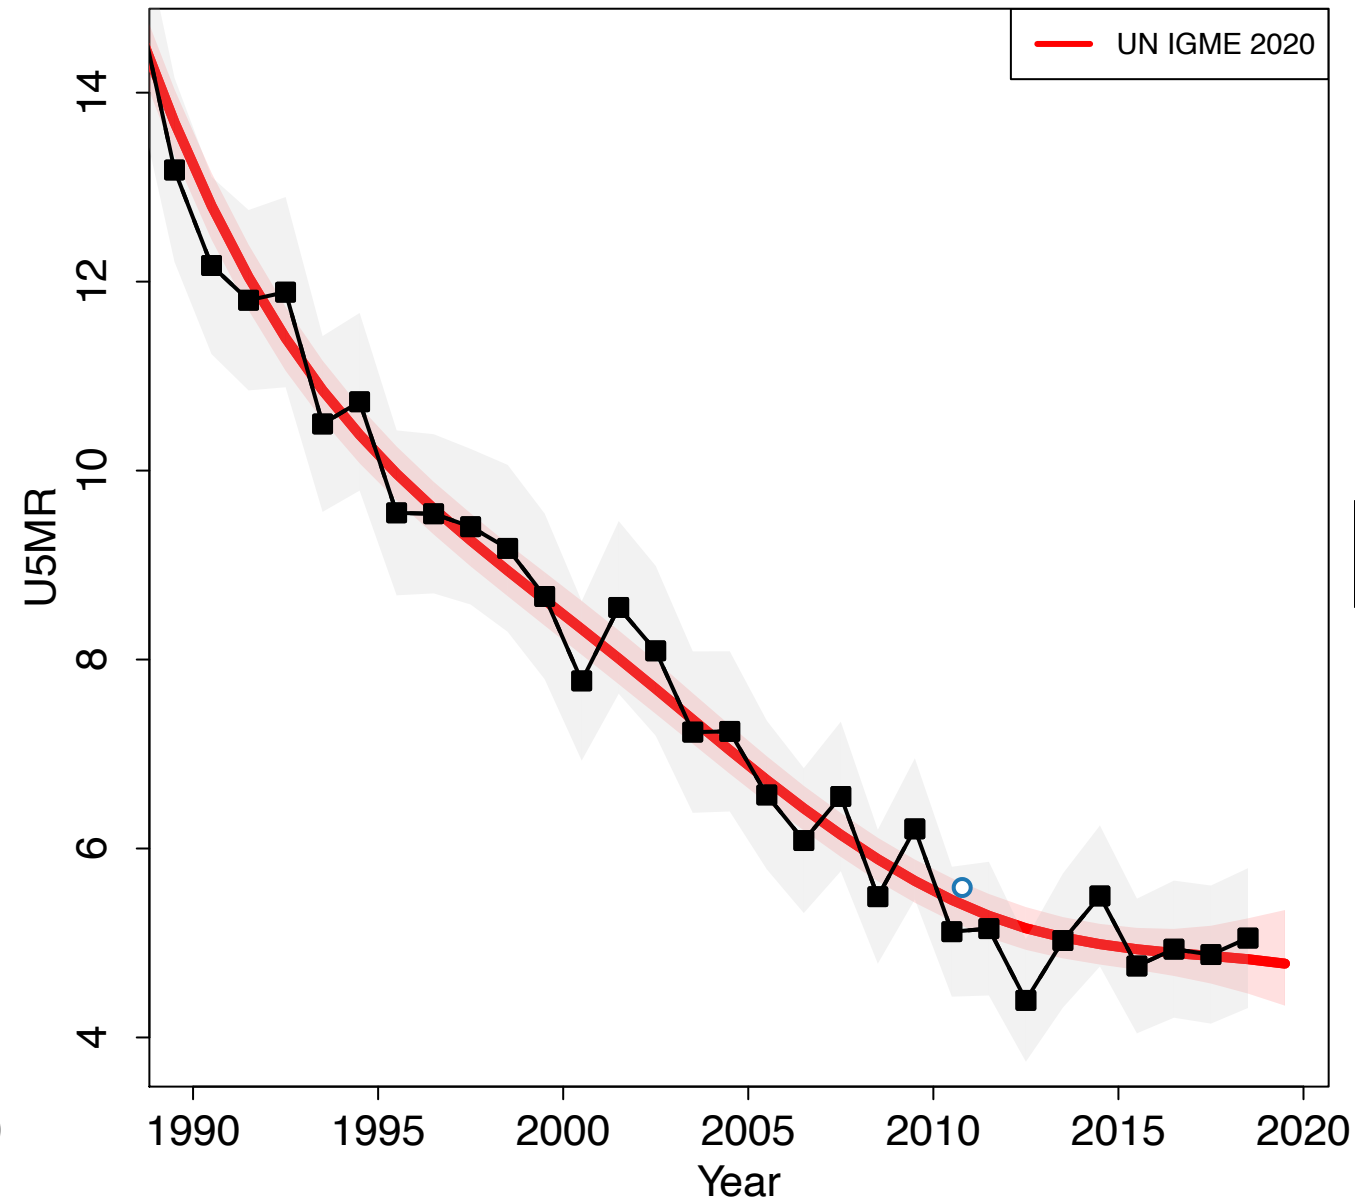

### Cuba

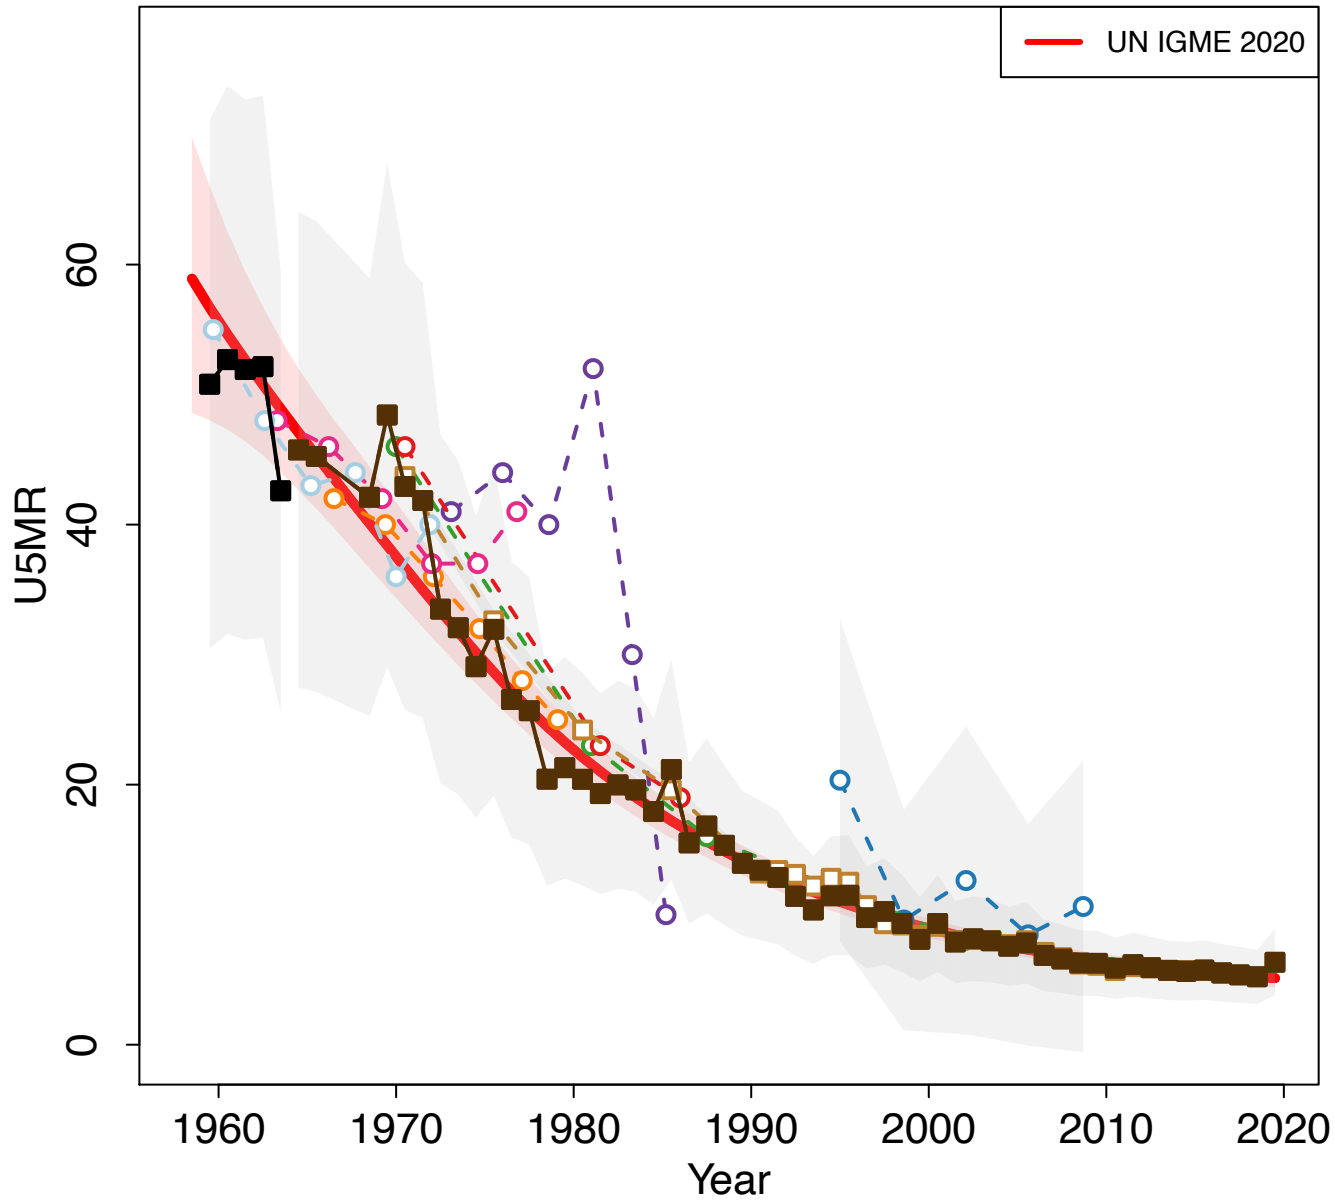

### Zoomed in

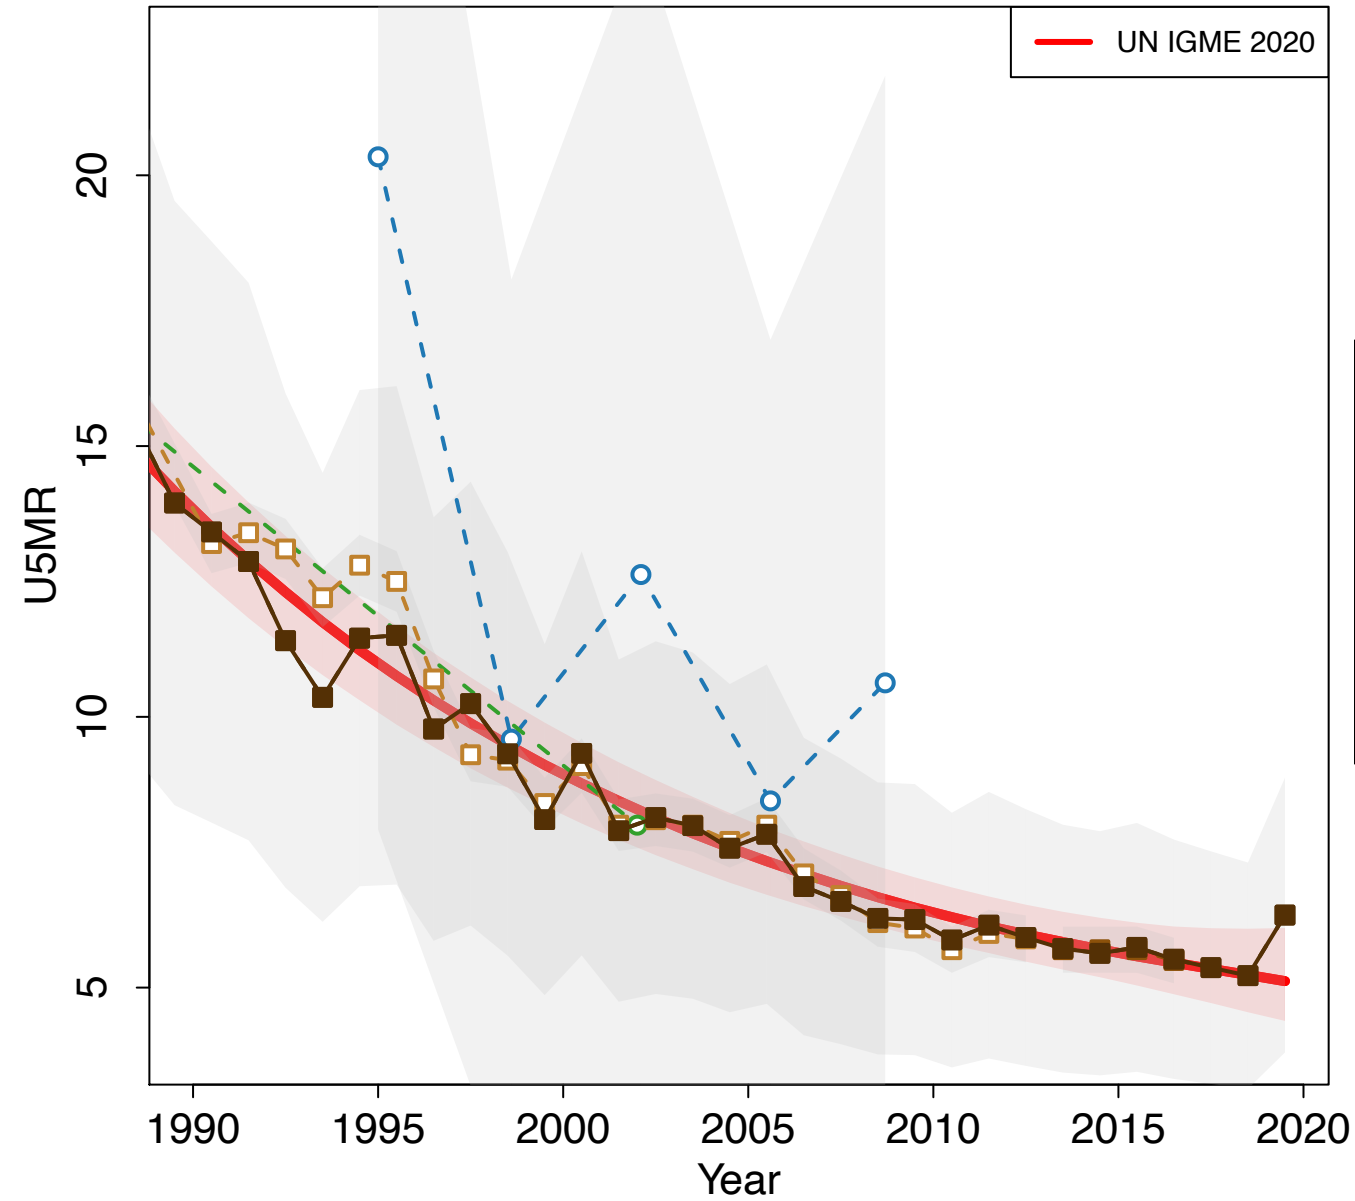

- National Population Survey on Income and Expenditures 1974 (Others Indirect)
- National Demographic Survey 1979 (Others Indirect)
- Census 1981 (Census Indirect)
- National Life Tables 1986 (Others Life Table)
- National Fertility Survey 1987 (Others Indirect)
- TABLAS DE VIDA NACIONALES 2002 (Others Life Table)
- Multiple Indicator Cluster Survey 2010–2011 (MICS Indirect)
- VR Vital Registration
- VR Vital Registration
- VR WHO
- VR UNPD Demographic Yearbook Data 2020 version

# Cyprus

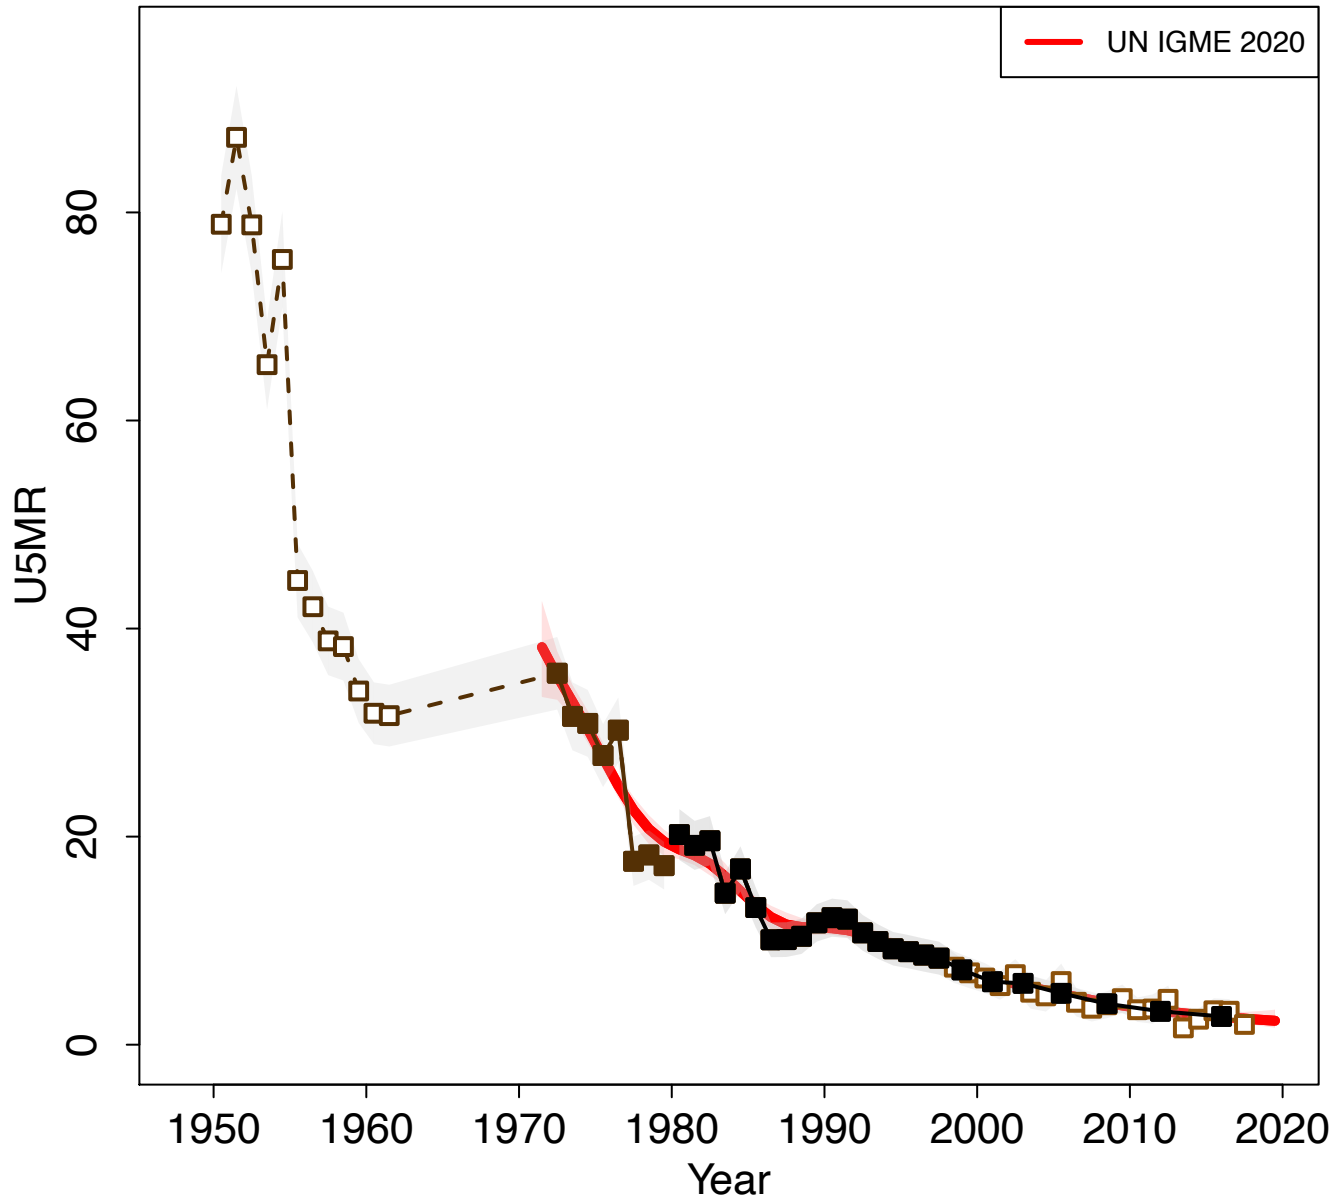

# Zoomed in

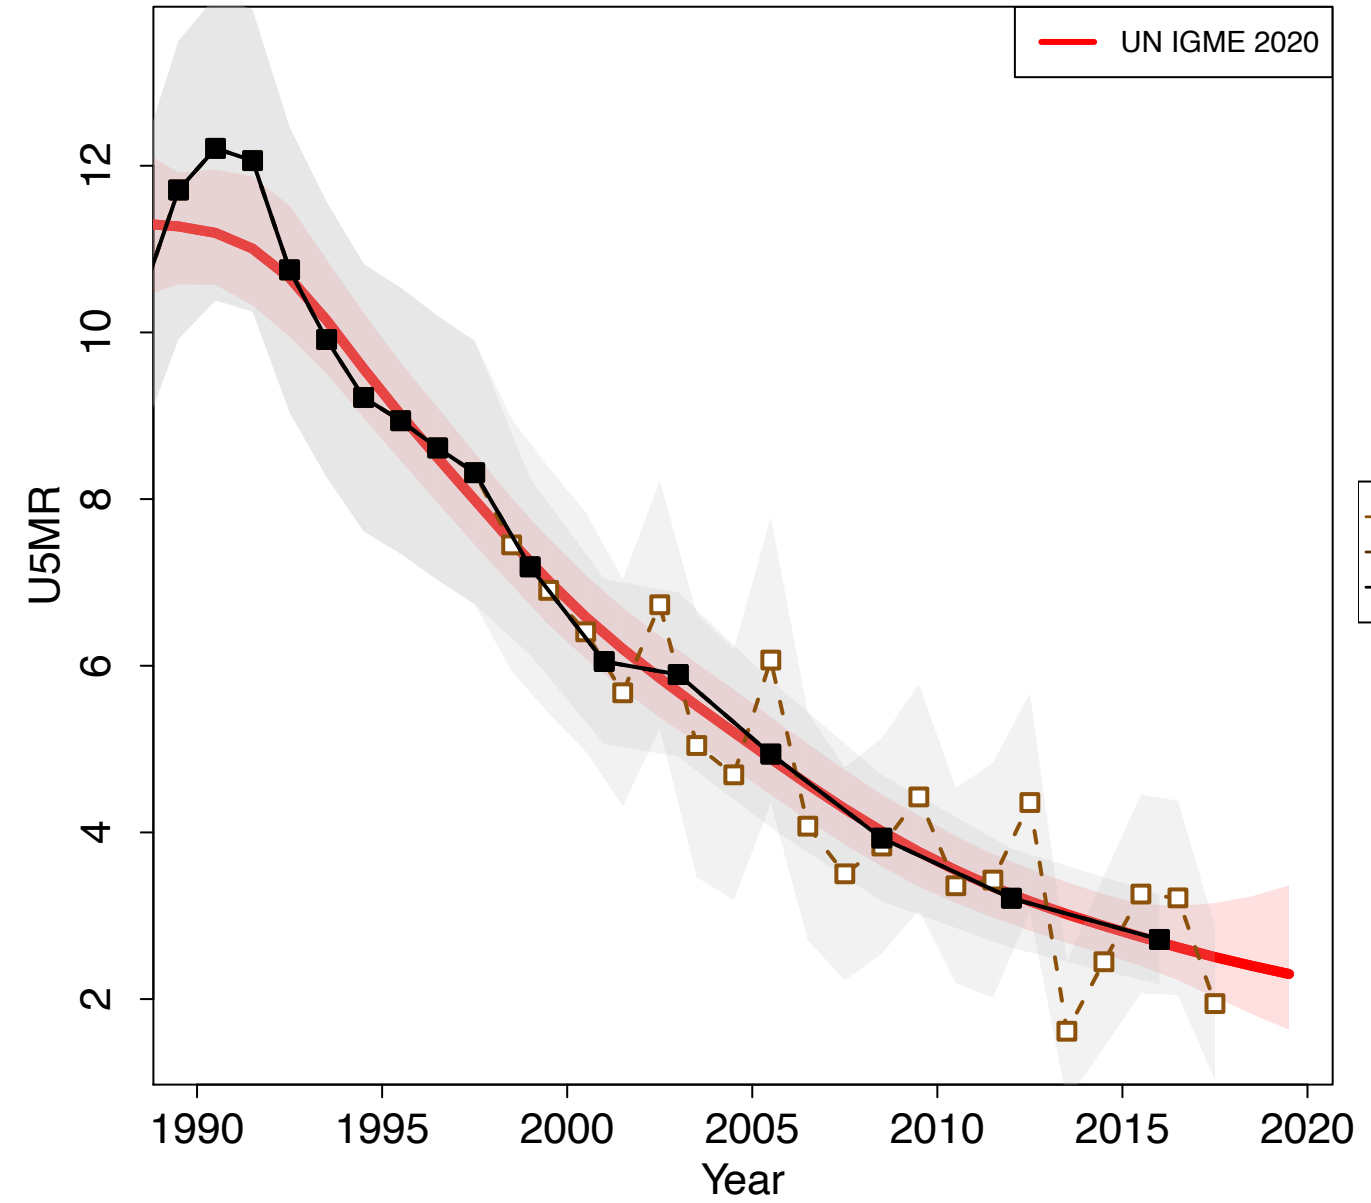

### Czechia

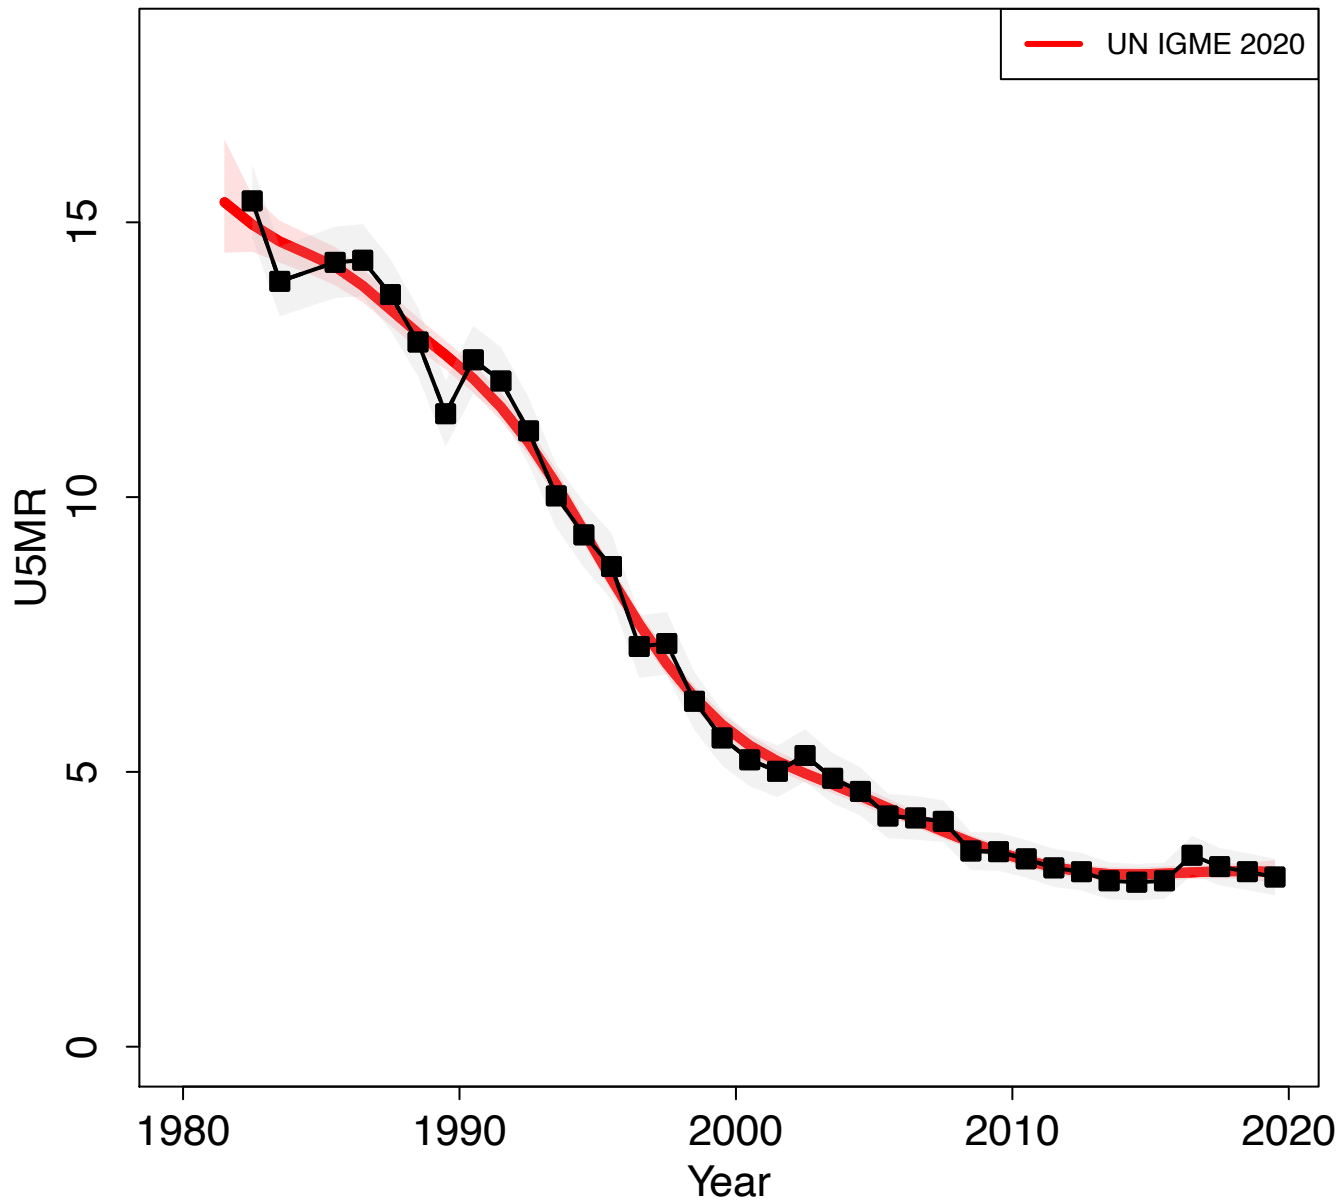

### Zoomed in

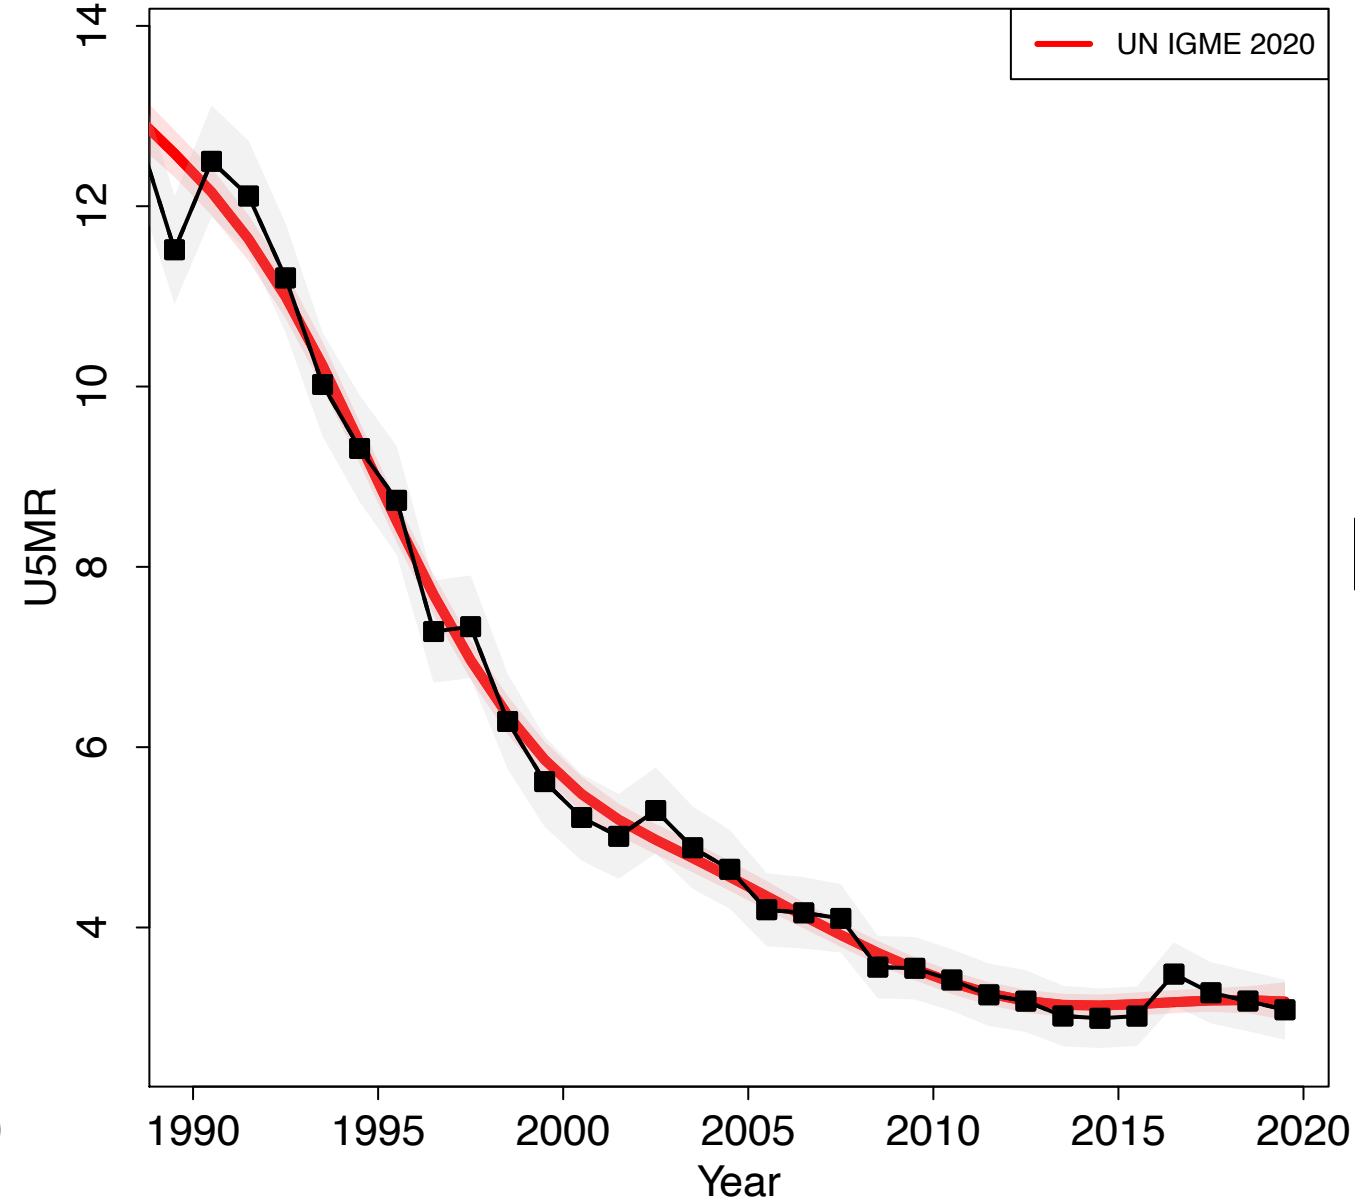



Denmark

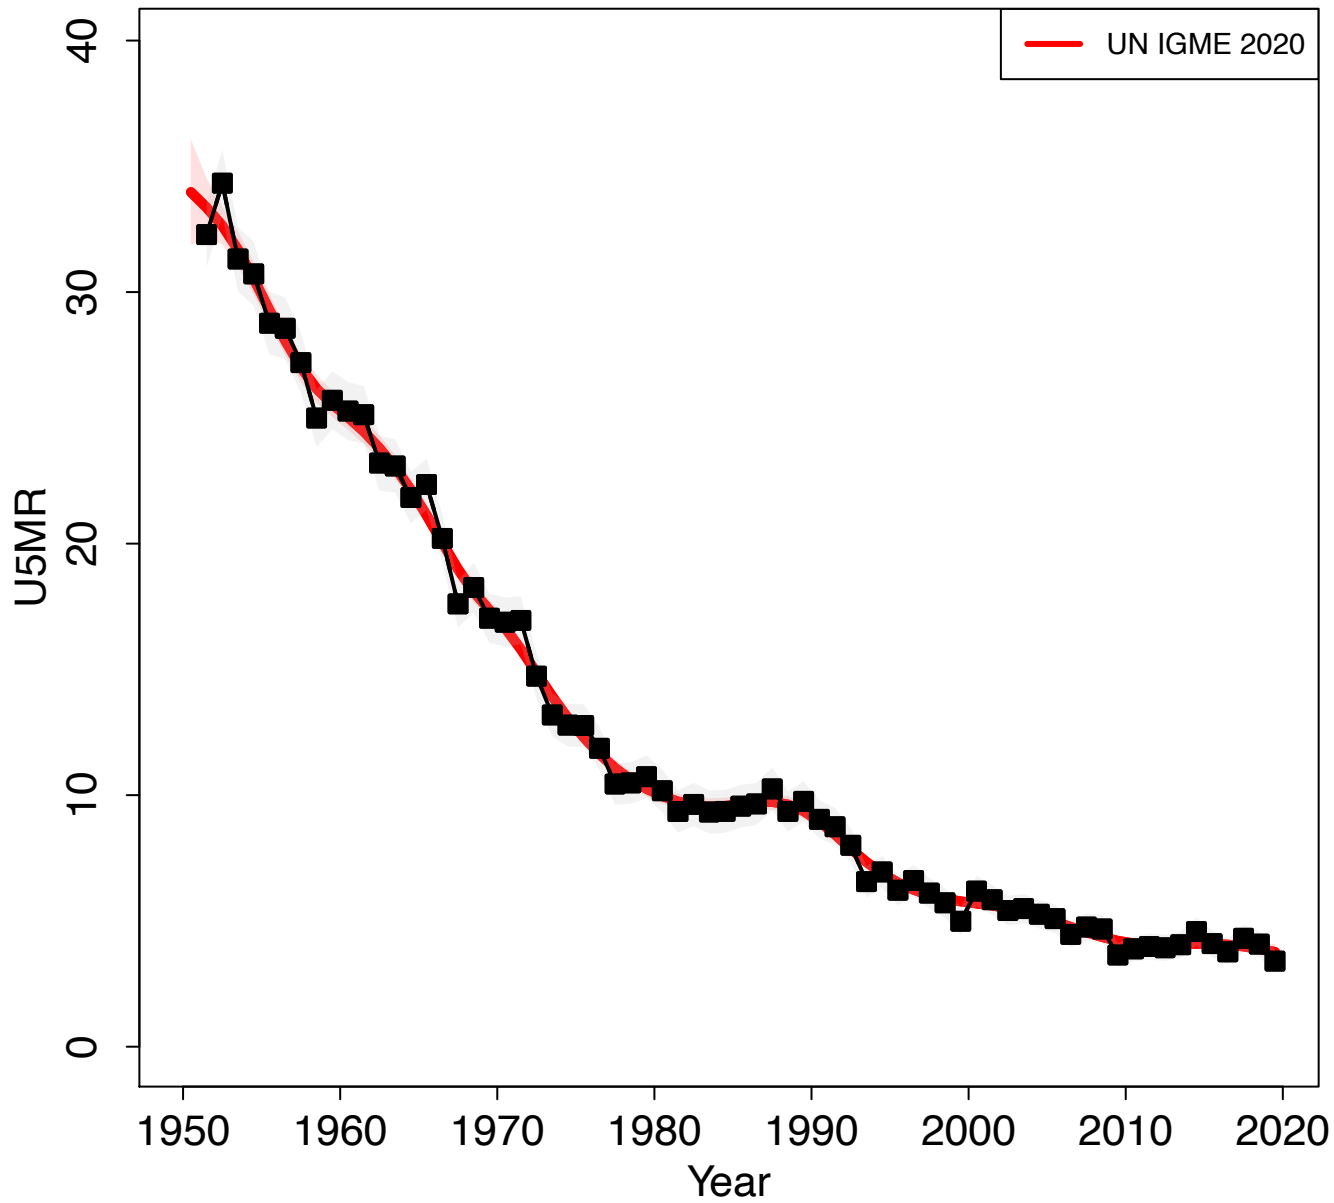

Zoomed in

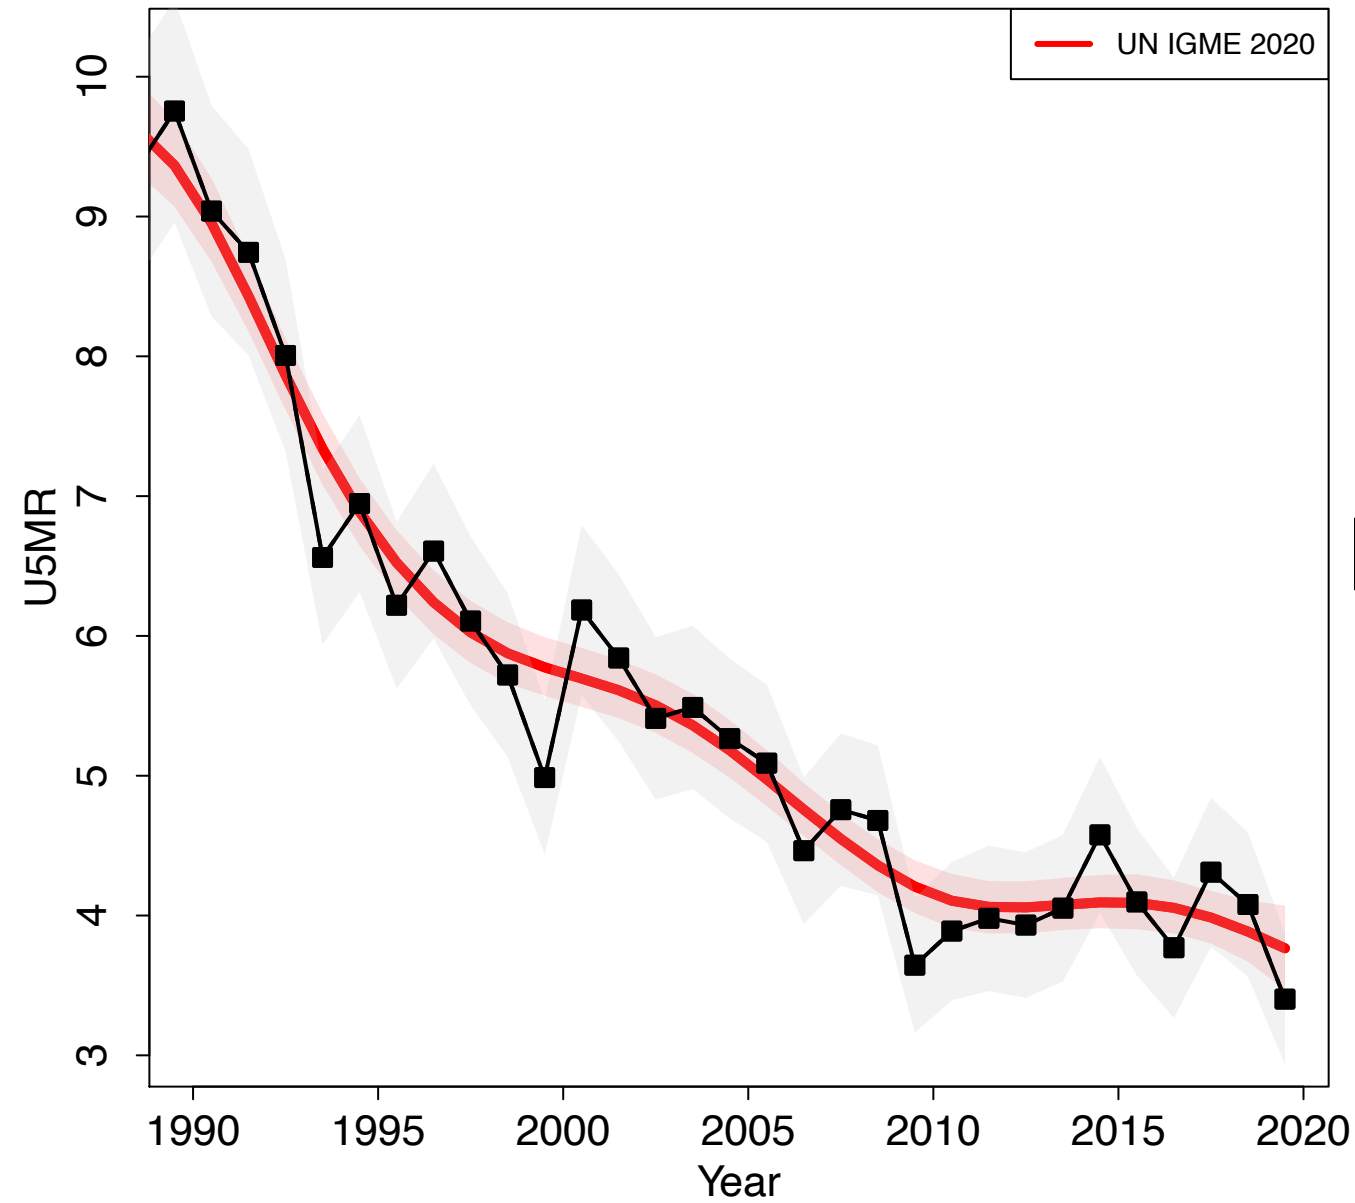

### Djibouti

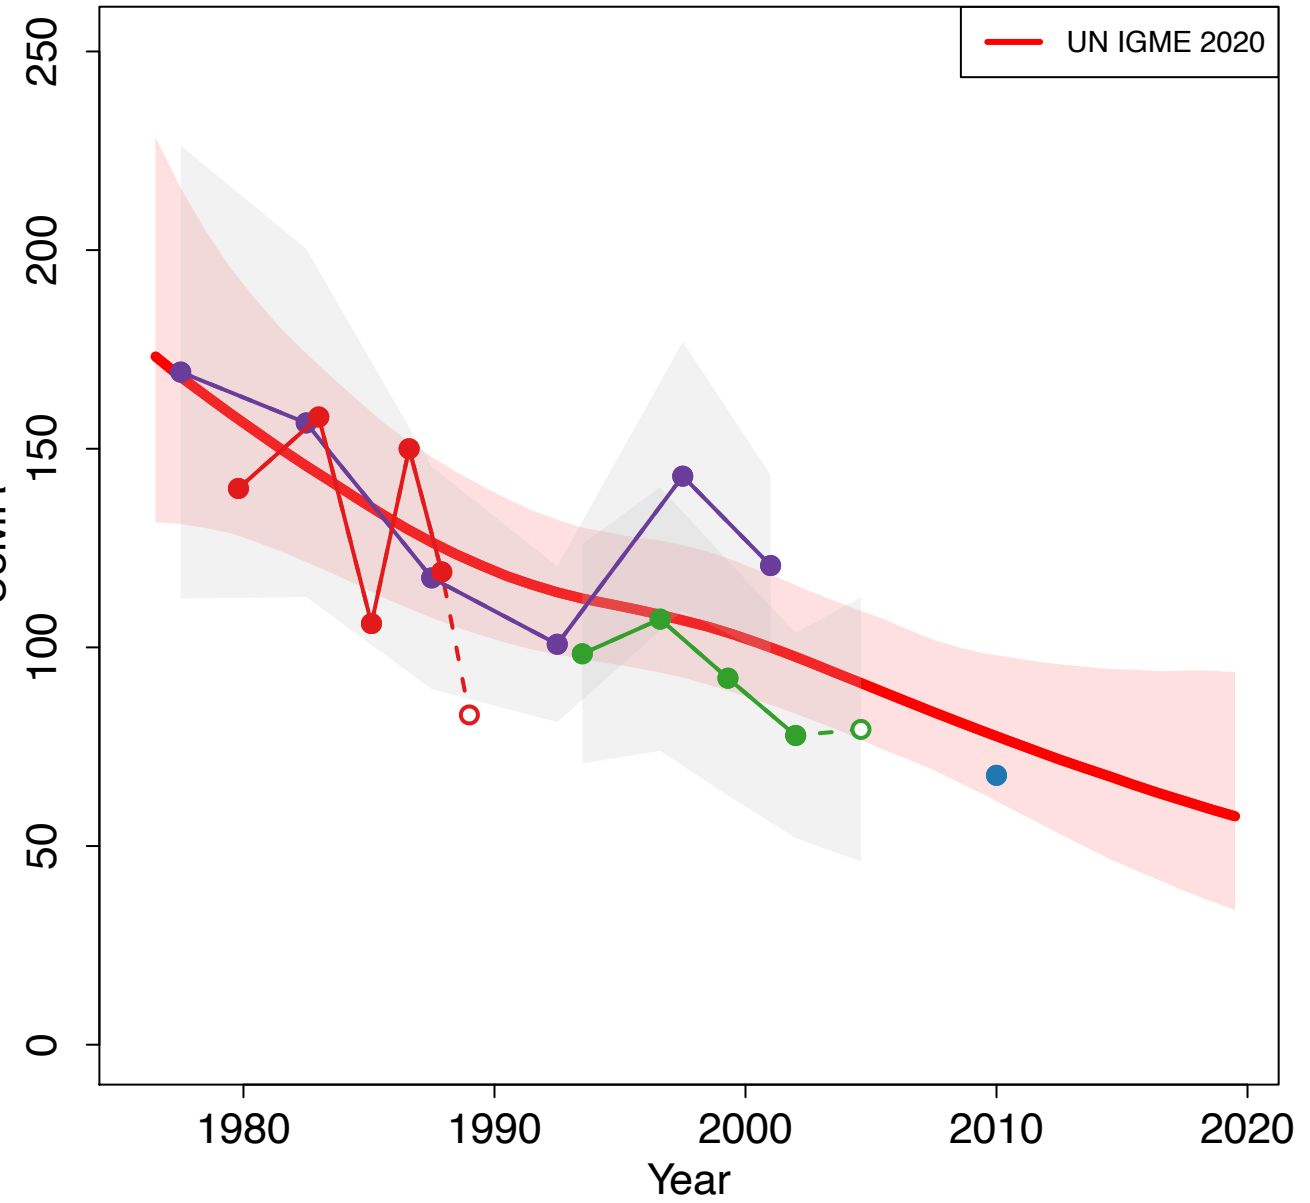

### Zoomed in

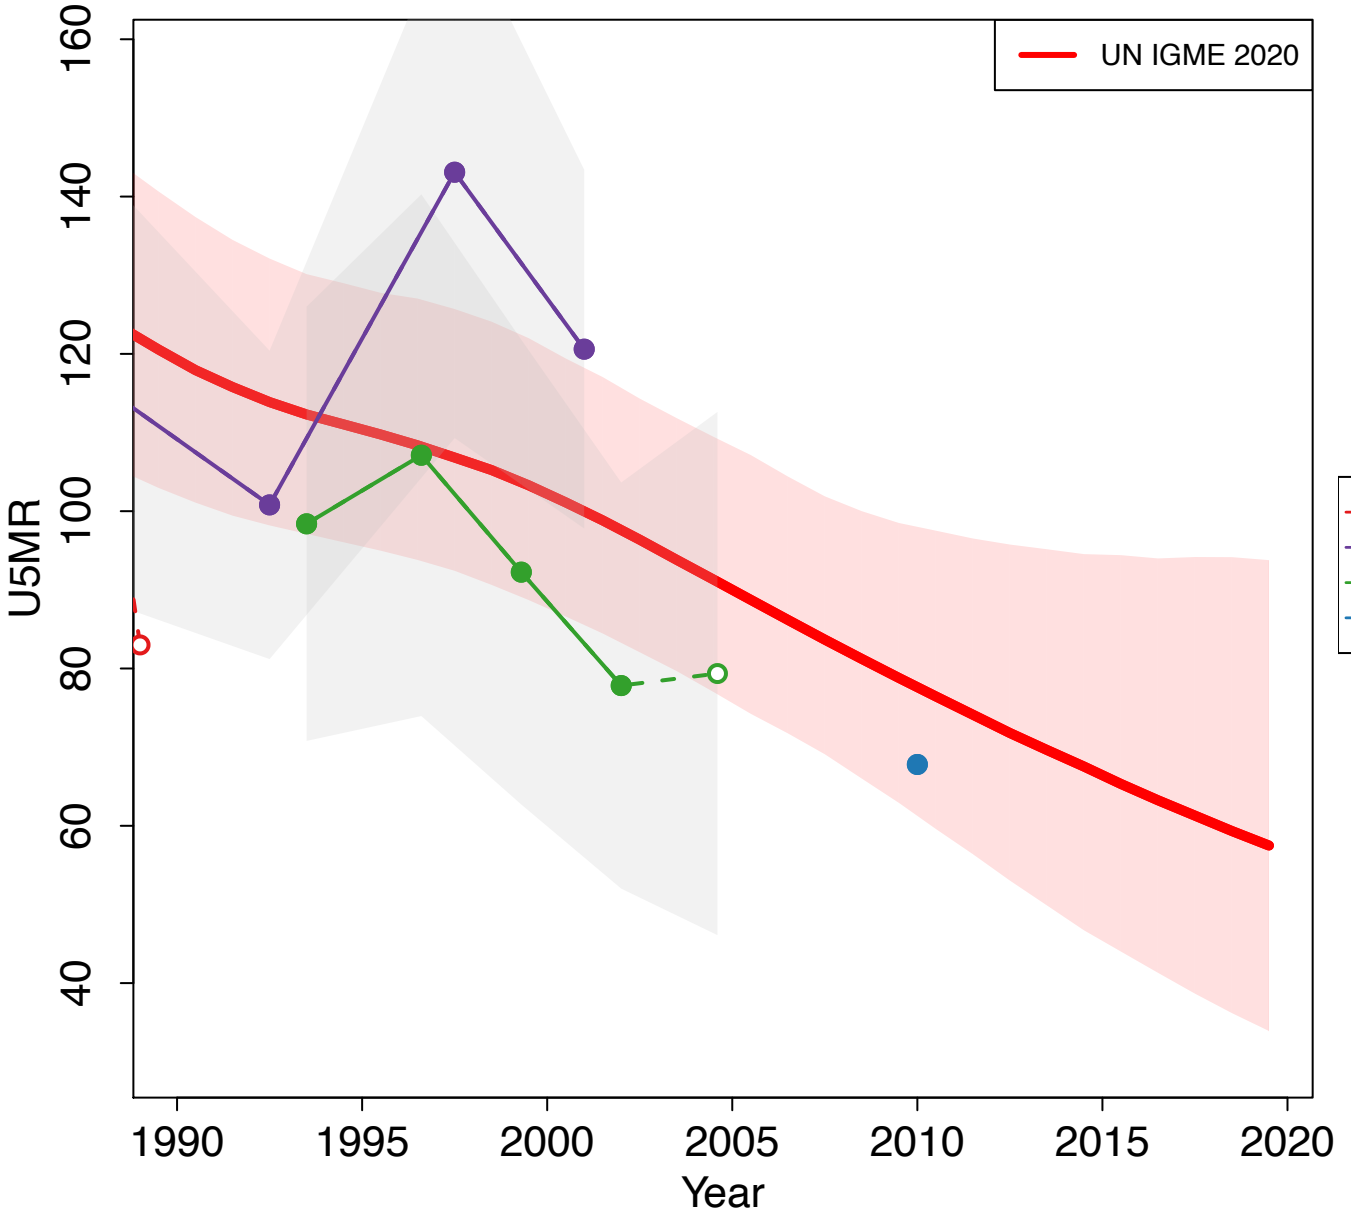

- Demographic Survey 1991 (Others Indirect)
- PAFAM Family Health Survey 2002 (Others Direct)
- Multiple Indicator Cluster Survey 2006 (MICS Indirect)
- PAFAM Family Health Survey 2012 (Others Direct)

### Dominica

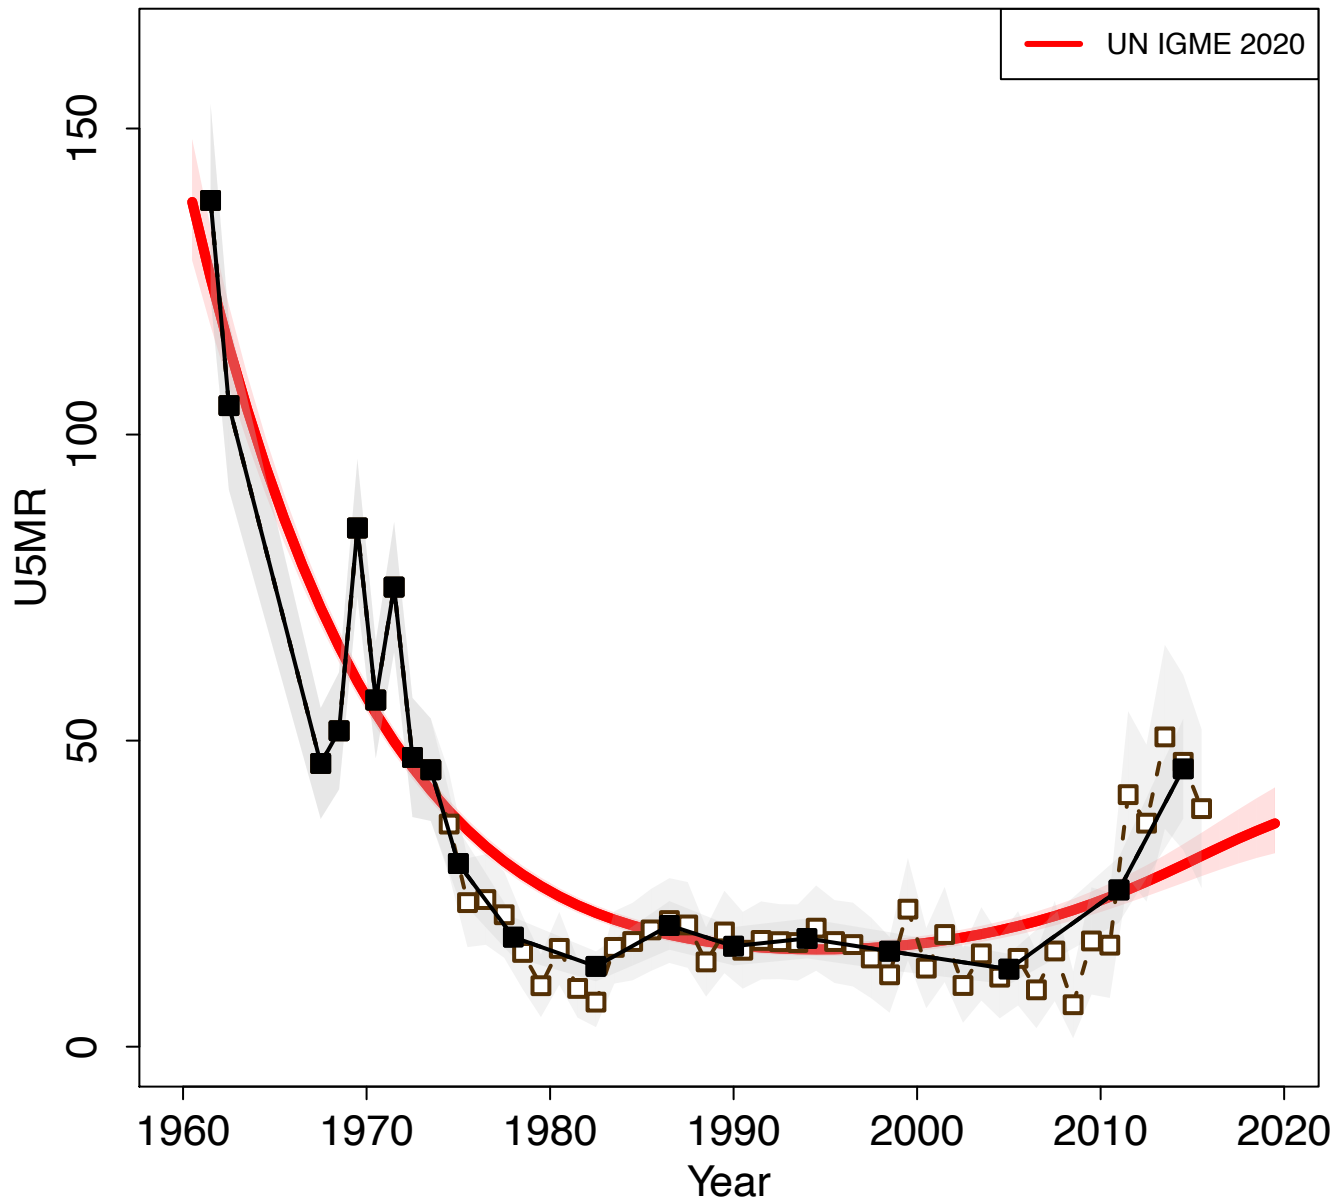

### Zoomed in

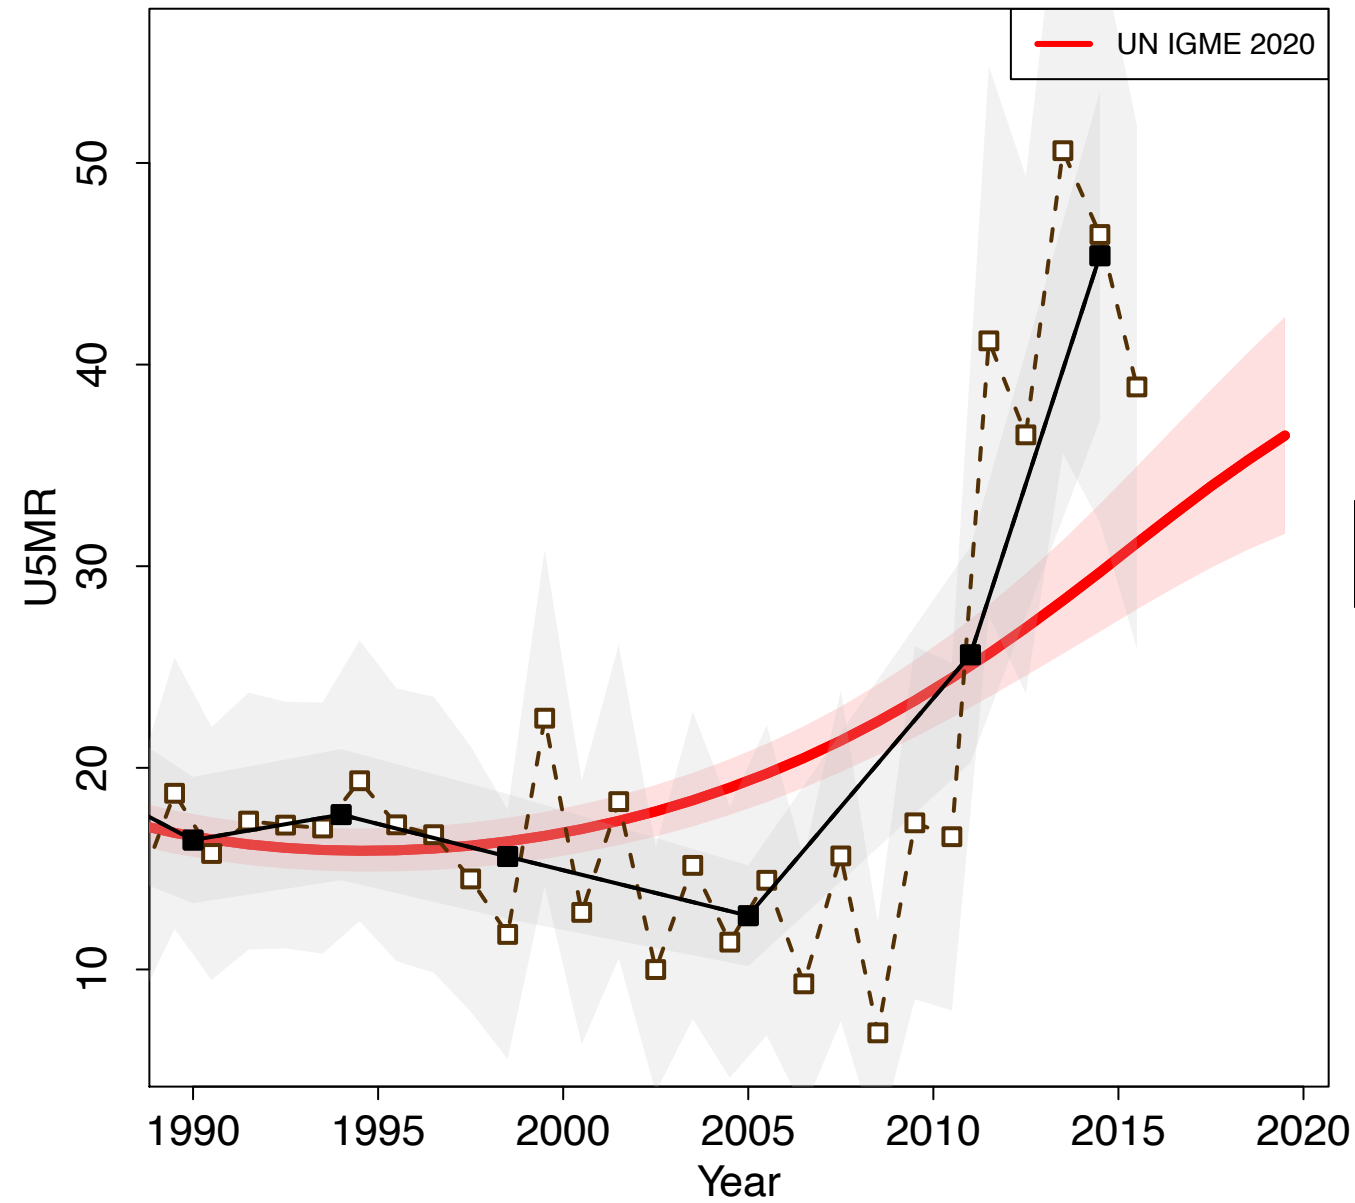

### Dominican Republic

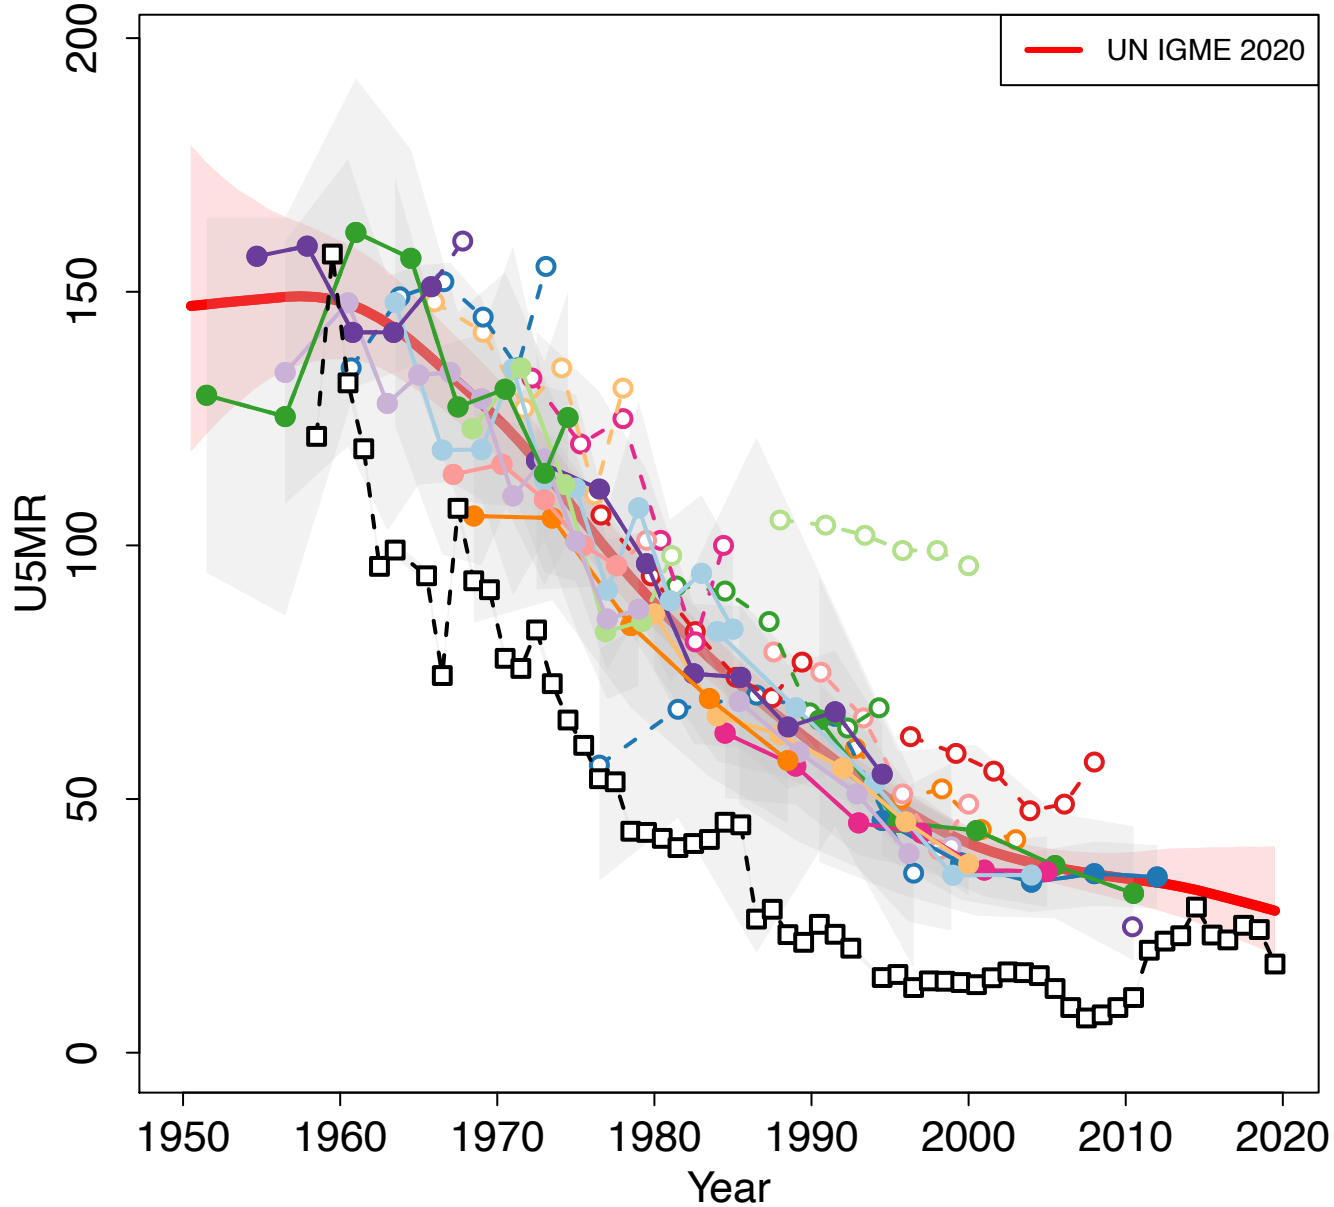

### Zoomed in

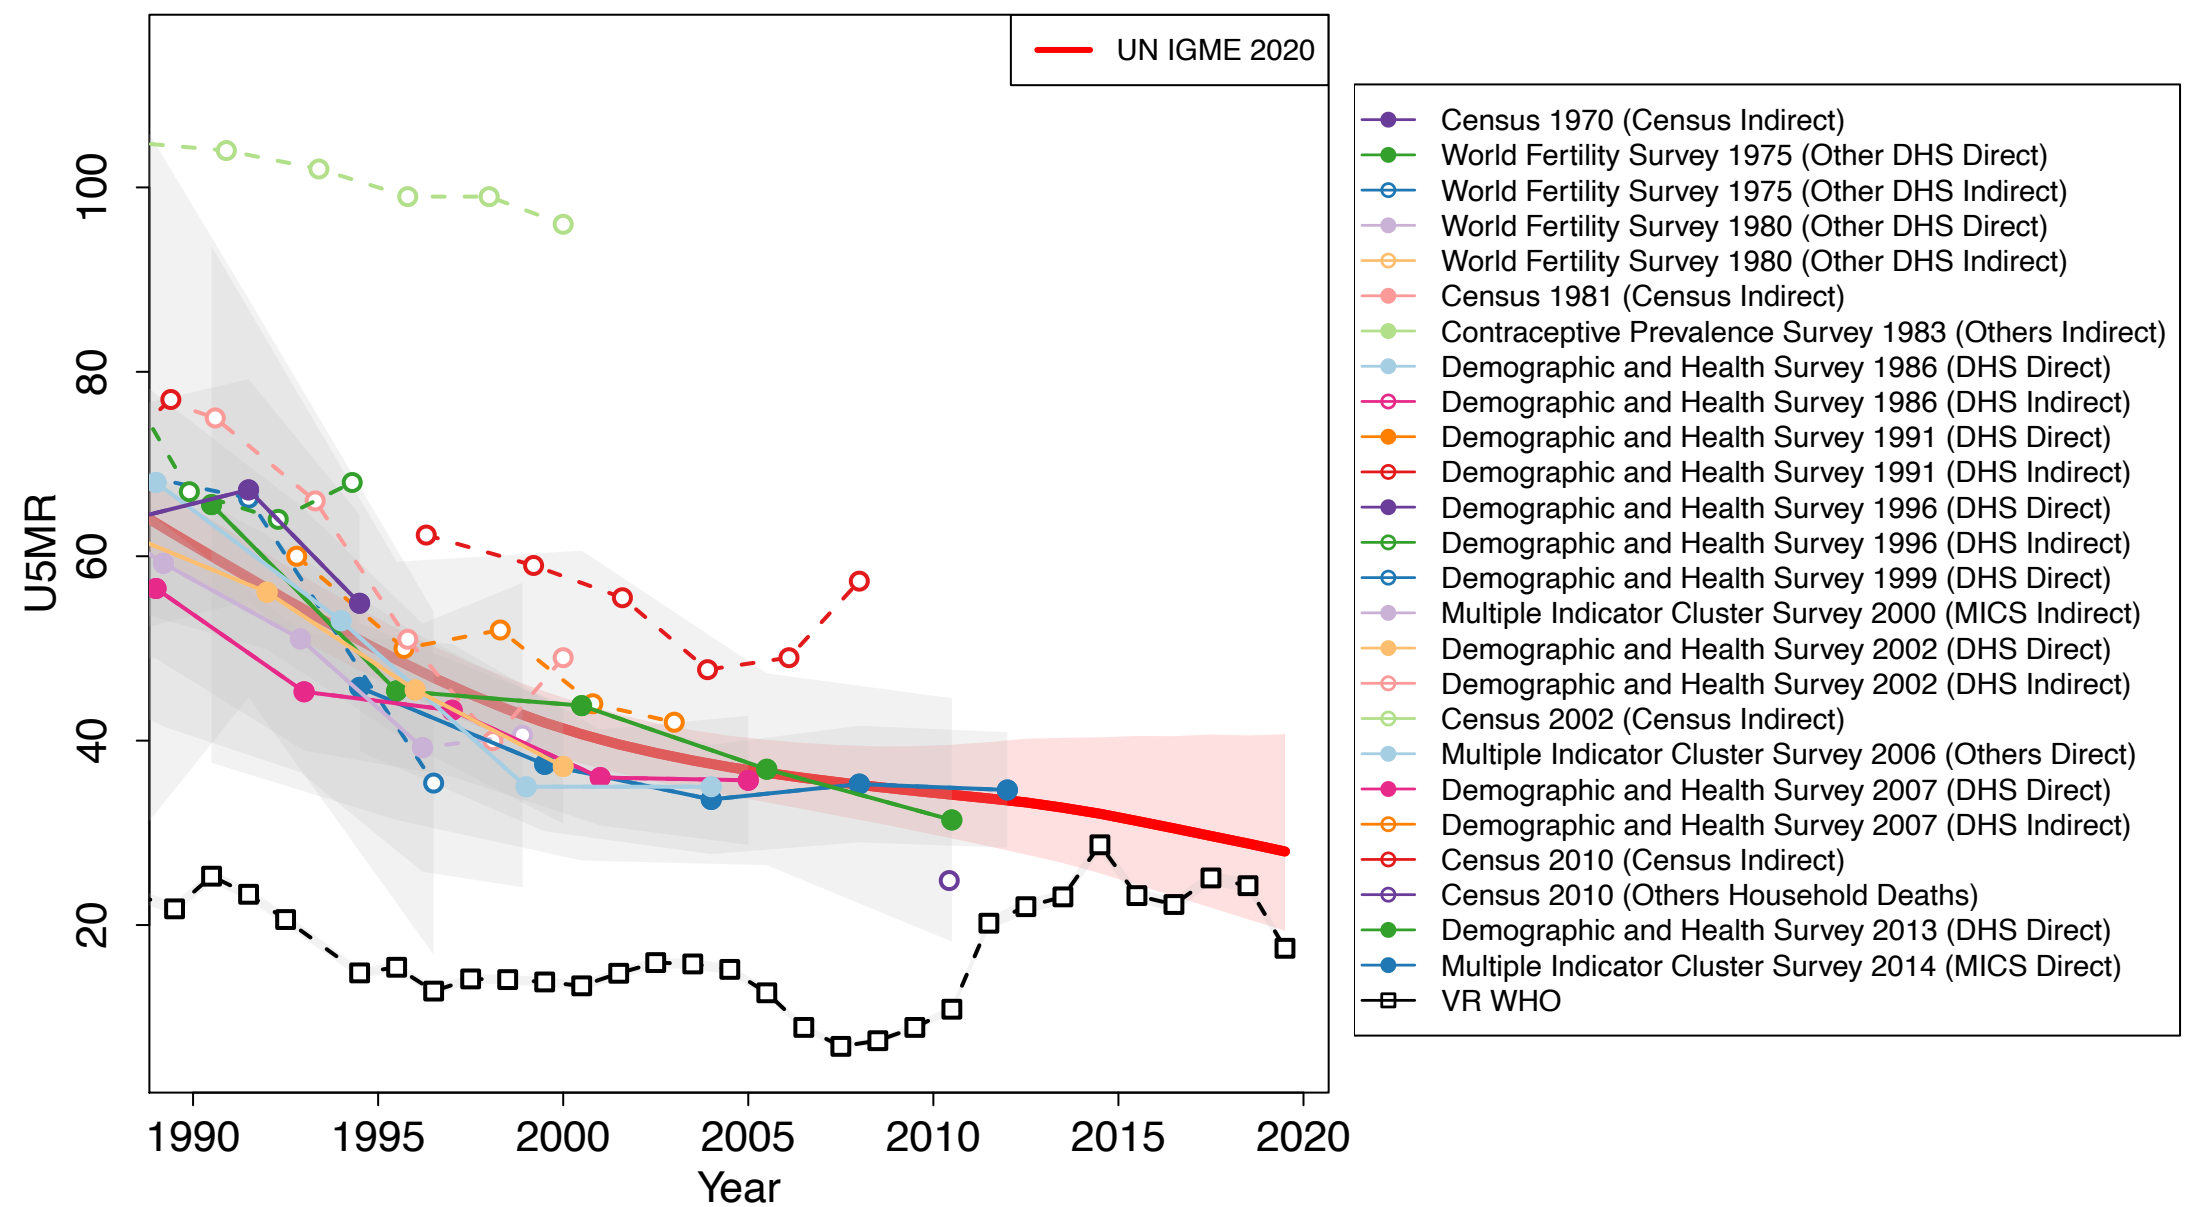

### Ecuador

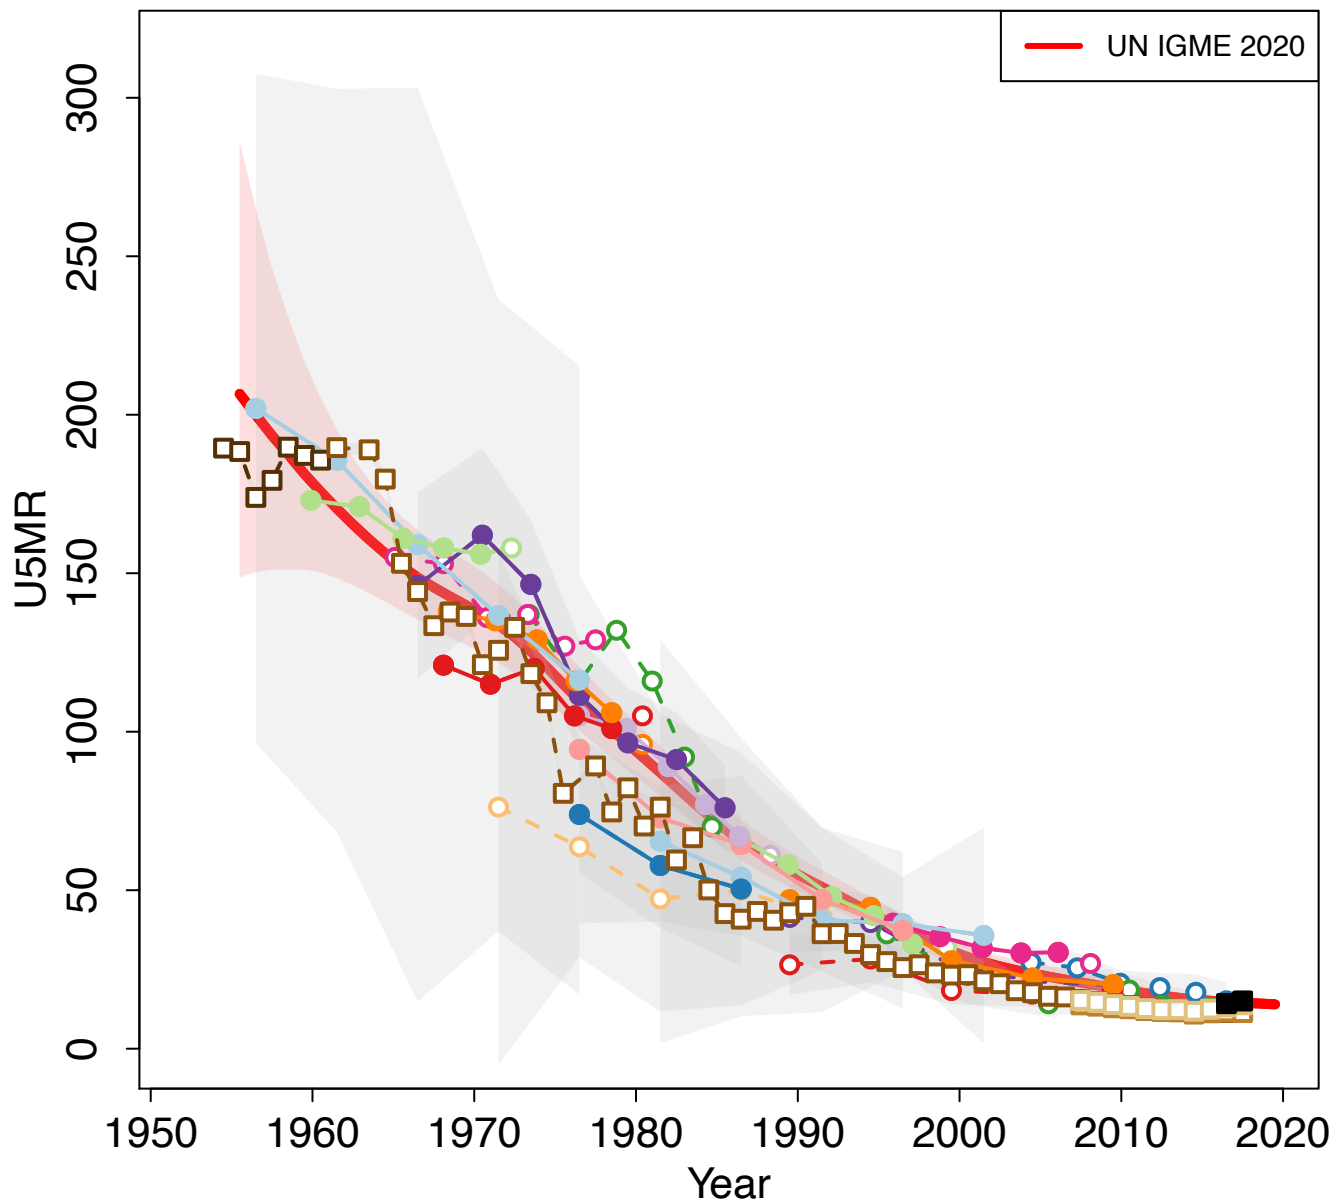

### Zoomed in

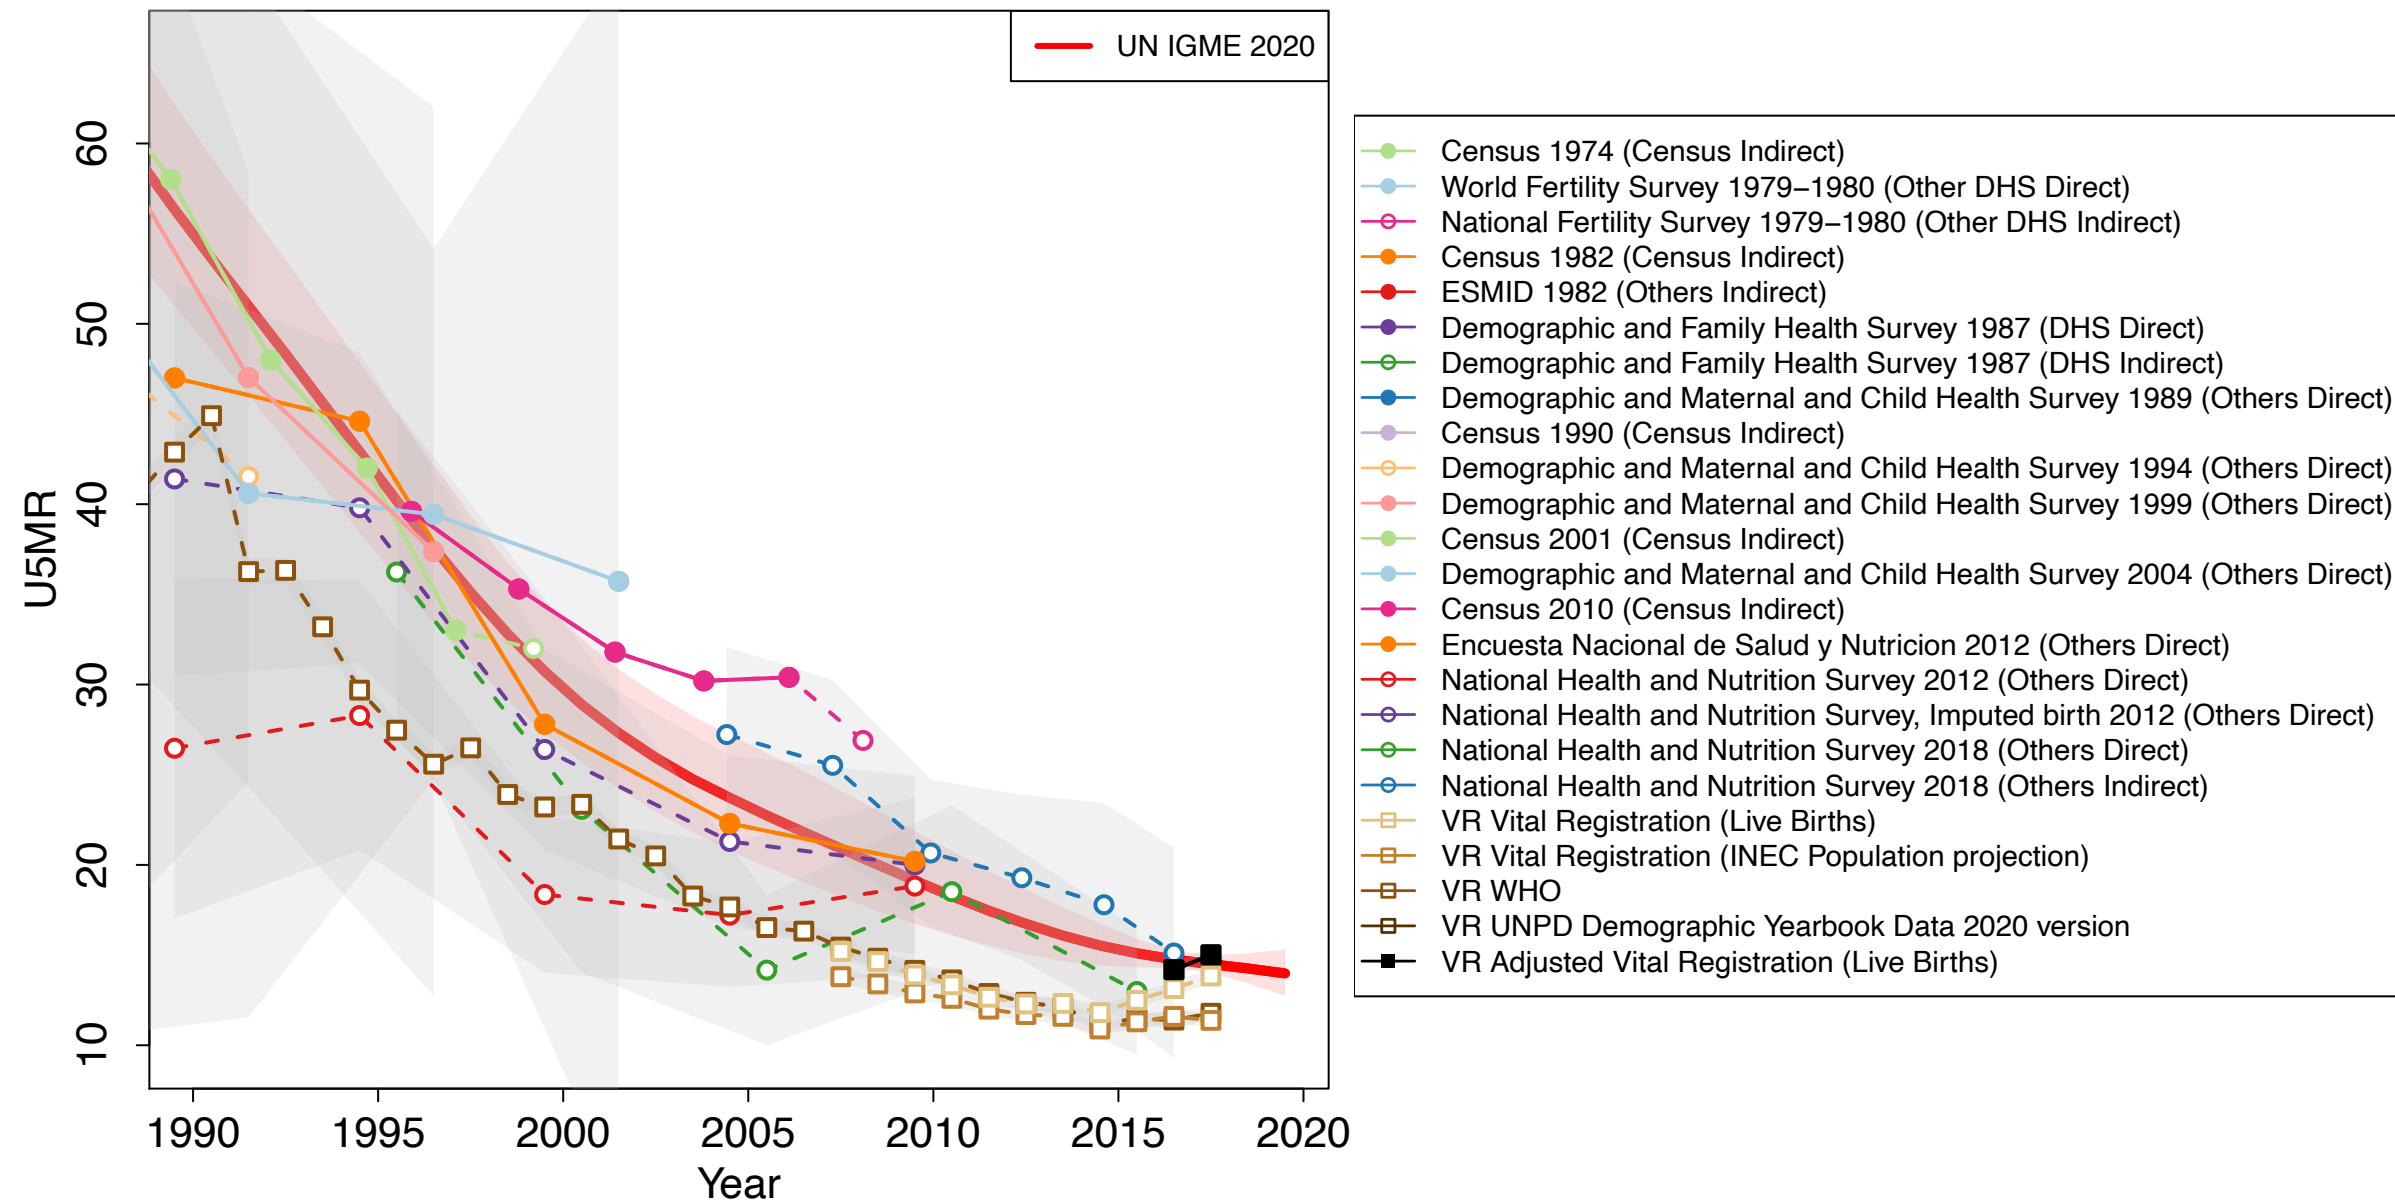

# Egypt

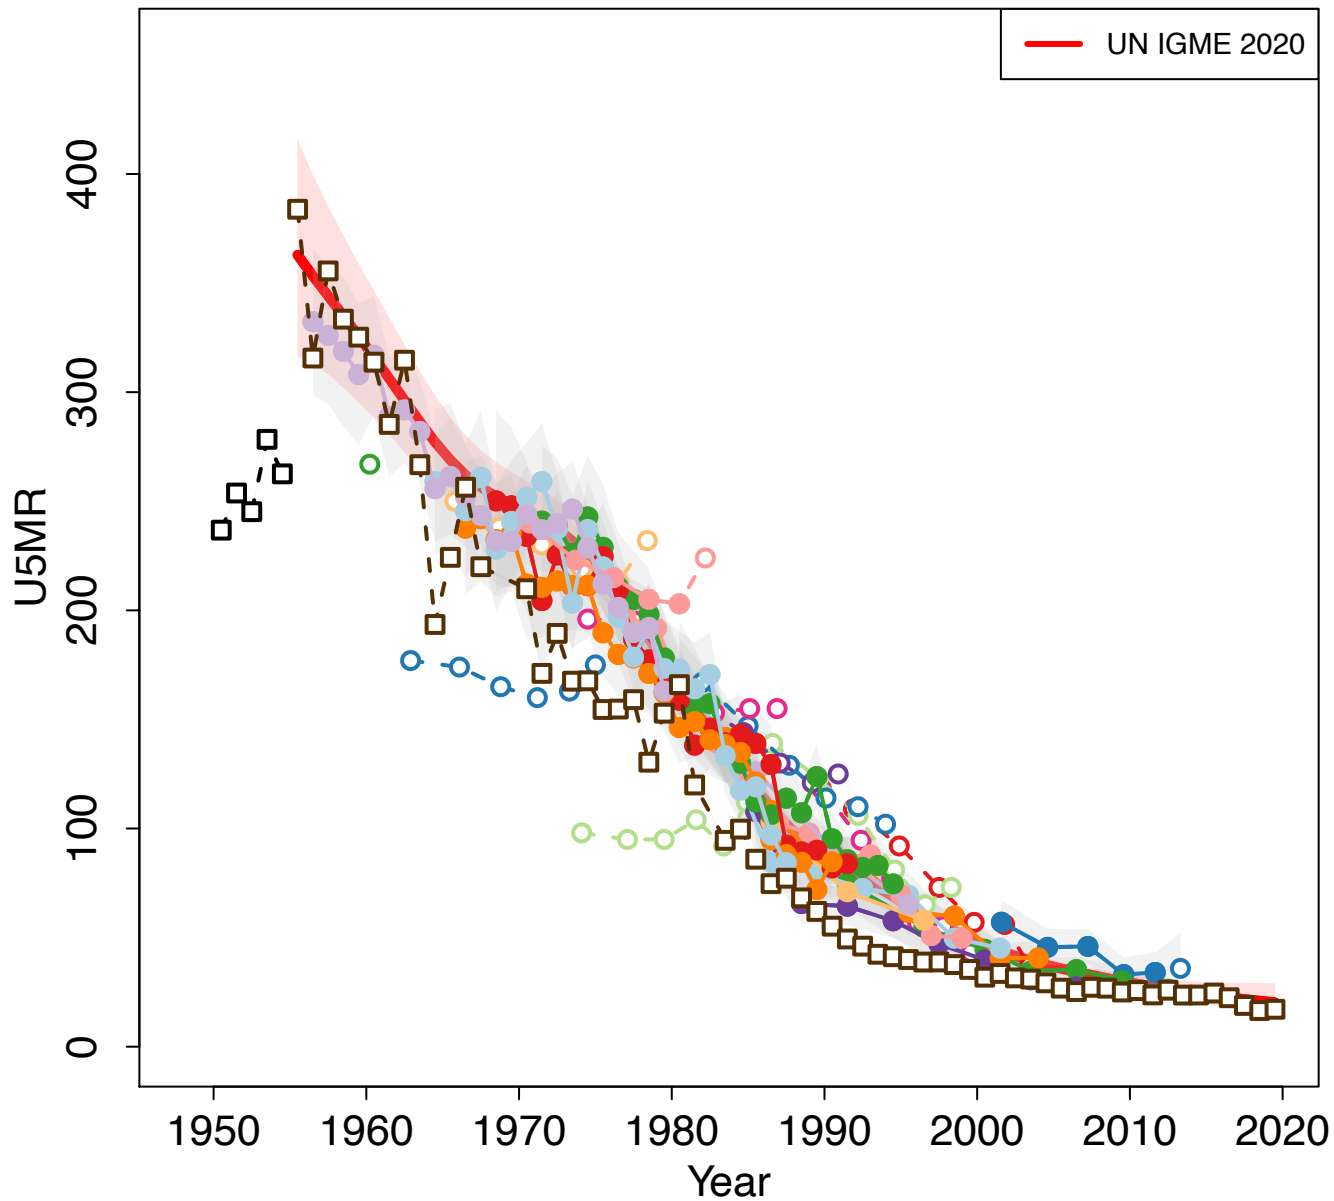

# Zoomed in

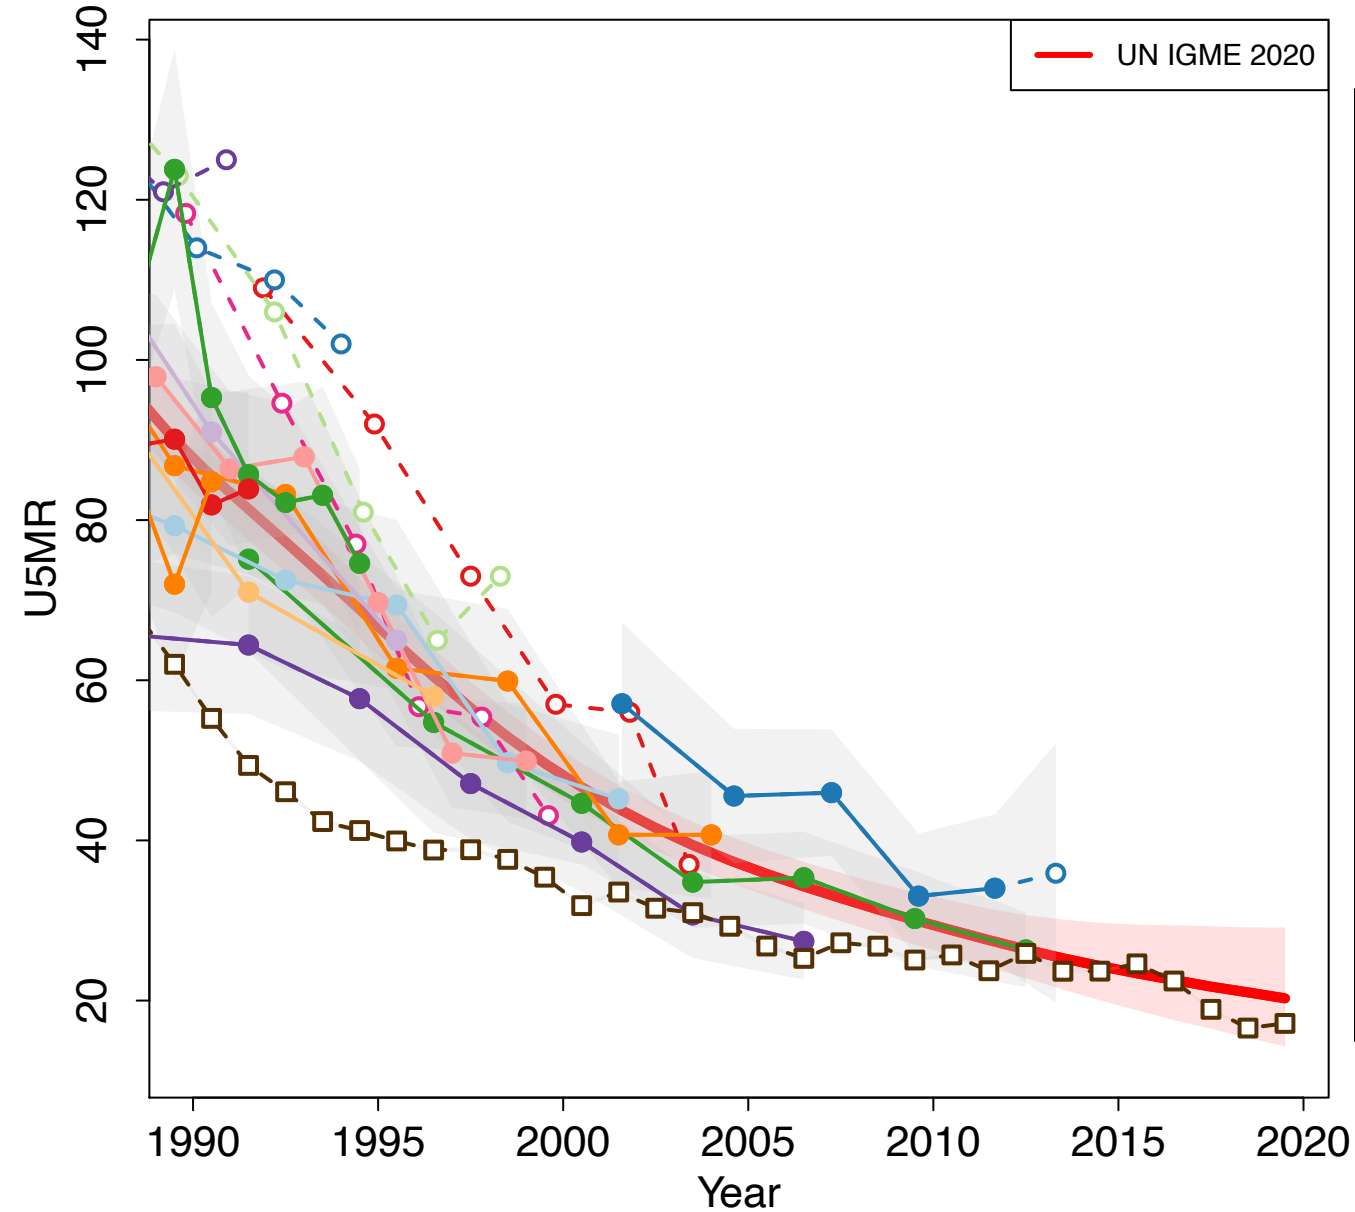

- Census 1960 (Others Household Deaths)
- Census 1976 (Census Indirect)
- World Fertility Survey 1980 (Other DHS Direct)
- World Fertility Survey 1980 (Other DHS Indirect)
- Contraceptive Prevalence Survey 1984 (Others Indirect)
- Census 1986 (Census Indirect)
- Demographic and Health Survey 1988 (DHS Direct)
- Demographic and Health Survey 1988 (DHS Indirect)
- PAPCHILD Maternal and Child Health Survey 1991 (Others Direct)
- Demographic and Health Survey 1992 (DHS Direct)
- Demographic and Health Survey 1992 (DHS Indirect)
- Demographic and Health Survey 1995 (DHS Direct)
- Demographic and Health Survey 1995 (DHS Indirect)
- Demographic and Health Survey 1997 (Other DHS Direct)
- Demographic and Health Survey 1998 (Other DHS Direct)
- Demographic and Health Survey 2000 (DHS Direct)
- Demographic and Health Survey 2000 (DHS Indirect)
- Demographic and Health Survey 2003 (Other DHS Direct)
- Demographic and Health Survey 2003 (Other DHS Indirect)
- Demographic and Health Survey 2005 (DHS Direct)
- Demographic and Health Survey 2005 (DHS Indirect)
- Demographic and Health Survey 2008 (DHS Direct)
- Demographic and Health Survey 2014 (DHS Direct)
- Health Indicator Survey 2015 (Other DHS Indirect)
- VR WHO
- VR UNPD Demographic Yearbook Data 2020 version

### El Salvador

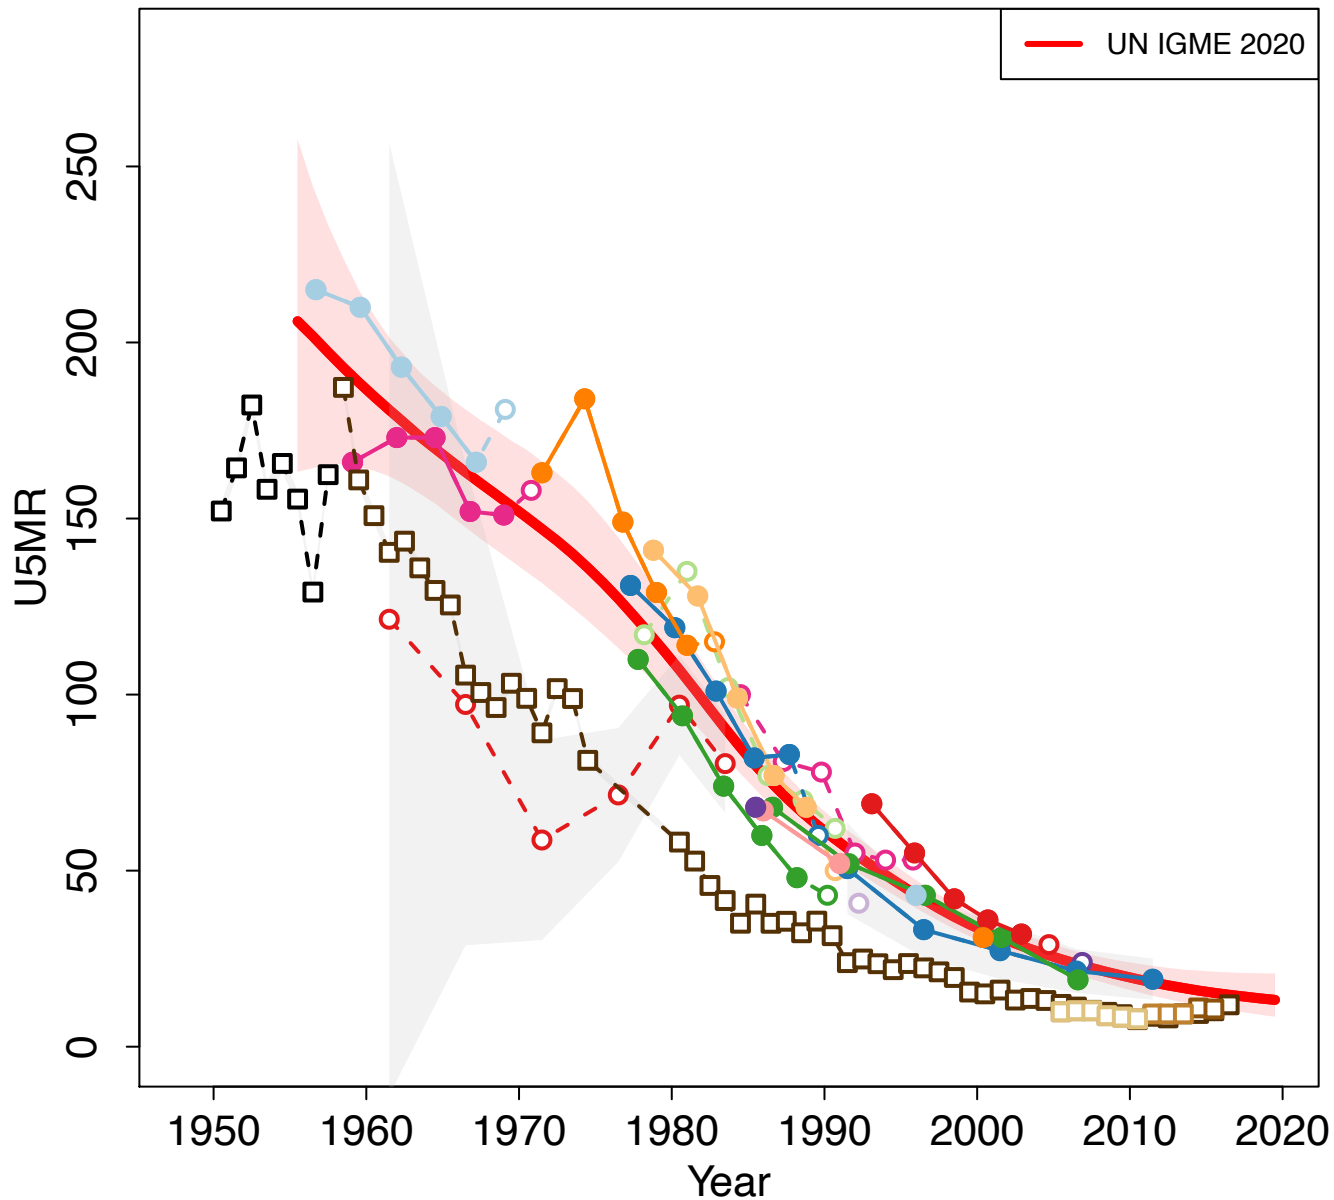

### Zoomed in

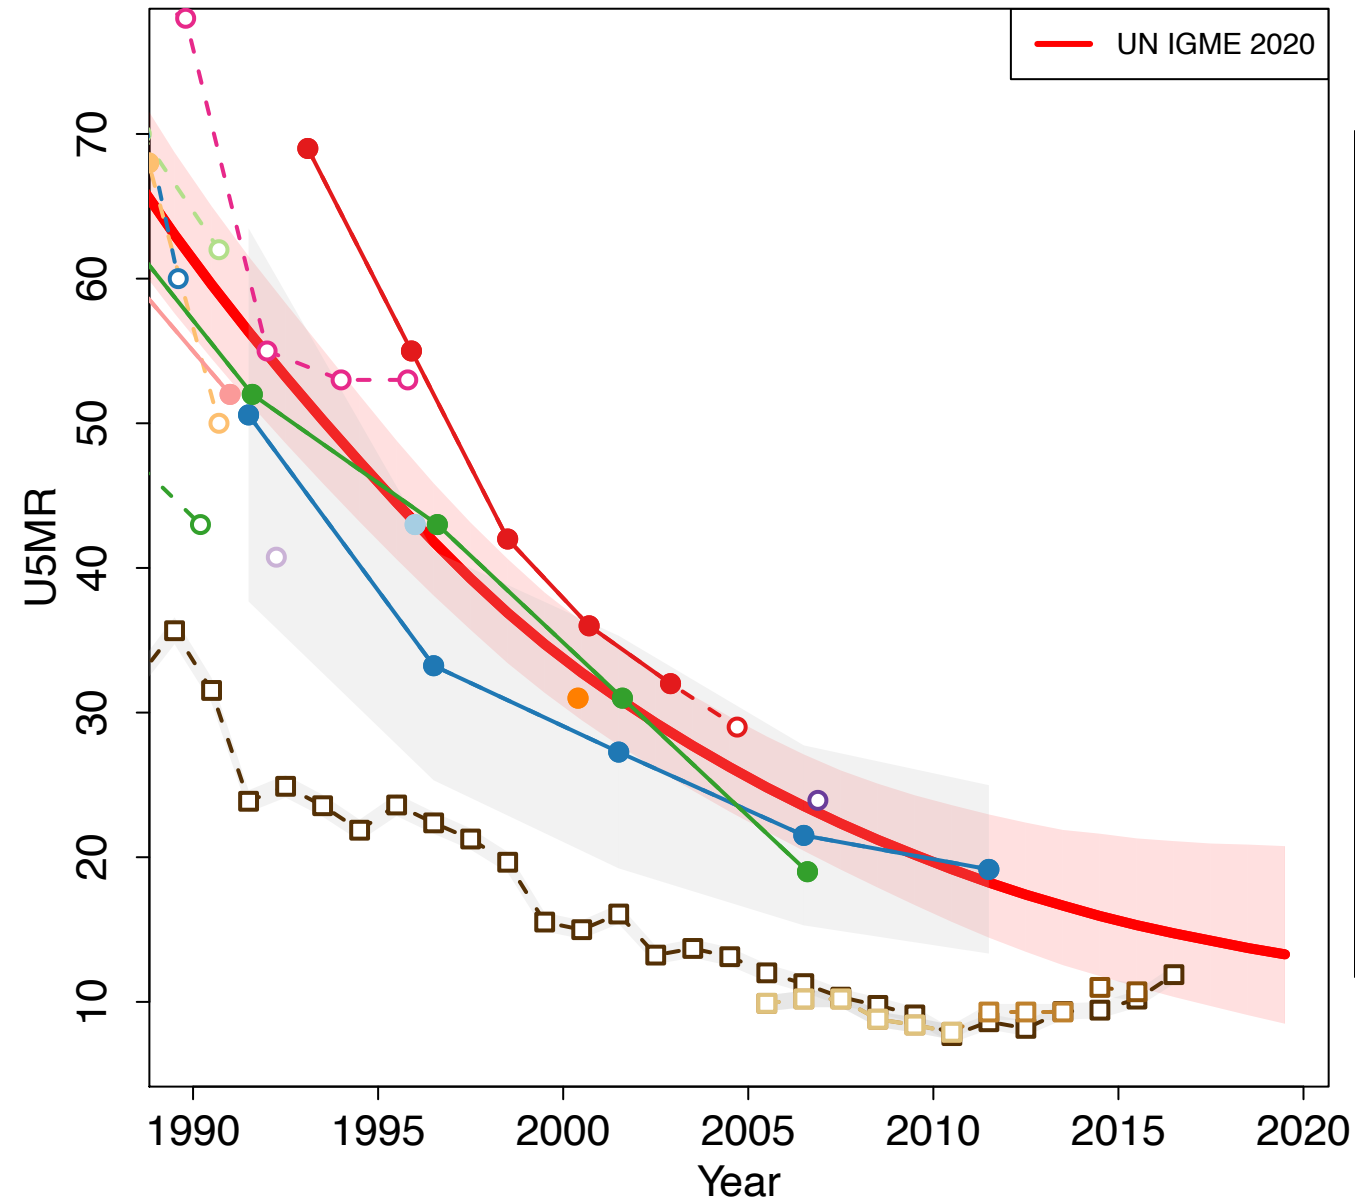

- Census 1971 (Census Indirect)
- National Fertility Survey 1973 (Others Indirect)
- National Family Health Survey 1985 (DHS Indirect)
- National Family Health Survey 1985 (DHS Direct)
- National Family Health Survey 1988 (Others Direct)
- Census 1992 (Census Indirect)
- Household Survey of Multiple Purposes 1992 (Others Indirect)
- Census 1992 (Others Household Deaths)
- Household Survey of Multiple Purposes 1993 (Others Indirect)
- National Family Health Survey 1993 (Others Direct)
- National Family Health Survey 1993 (Others Indirect)
- National Family Health Survey 1998 (Others Direct)
- National Family Health Survey 1998 (Others Indirect)
- National Family Health Survey 2002–2003 (Others Direct)
- Census 2007 (Census Indirect)
- Census 2007 (Others Household Deaths)
- National Family Health Survey 2008 (Others Direct)
- National Health Survey 2014 (MICS Direct)
- VR Vital Registration data from Informe de Labores Ministerio de Salud 2010–2011
- VR Vital Registration data from Informe de Labores Ministerio de Salud 2013–2014
- VR Vital Registration data from Informe de Labores Ministerio de Salud 2015–2016
- VR WHO
- VR UNPD Demographic Yearbook Data 2020 version

### Equatorial Guinea

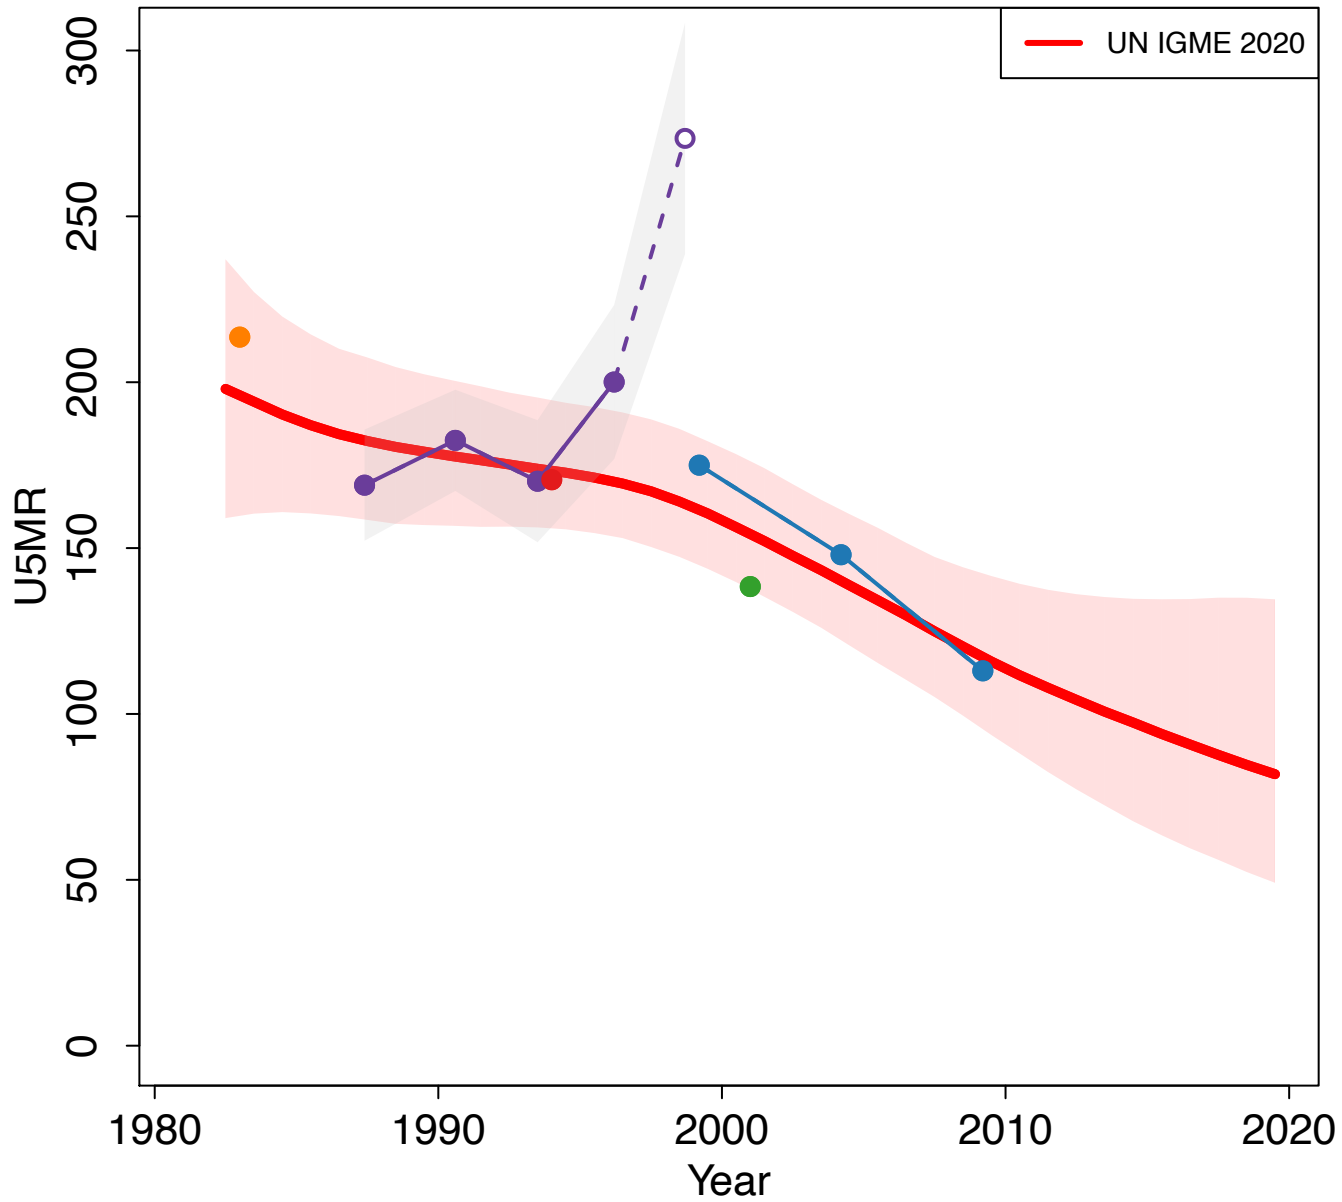

### Zoomed in

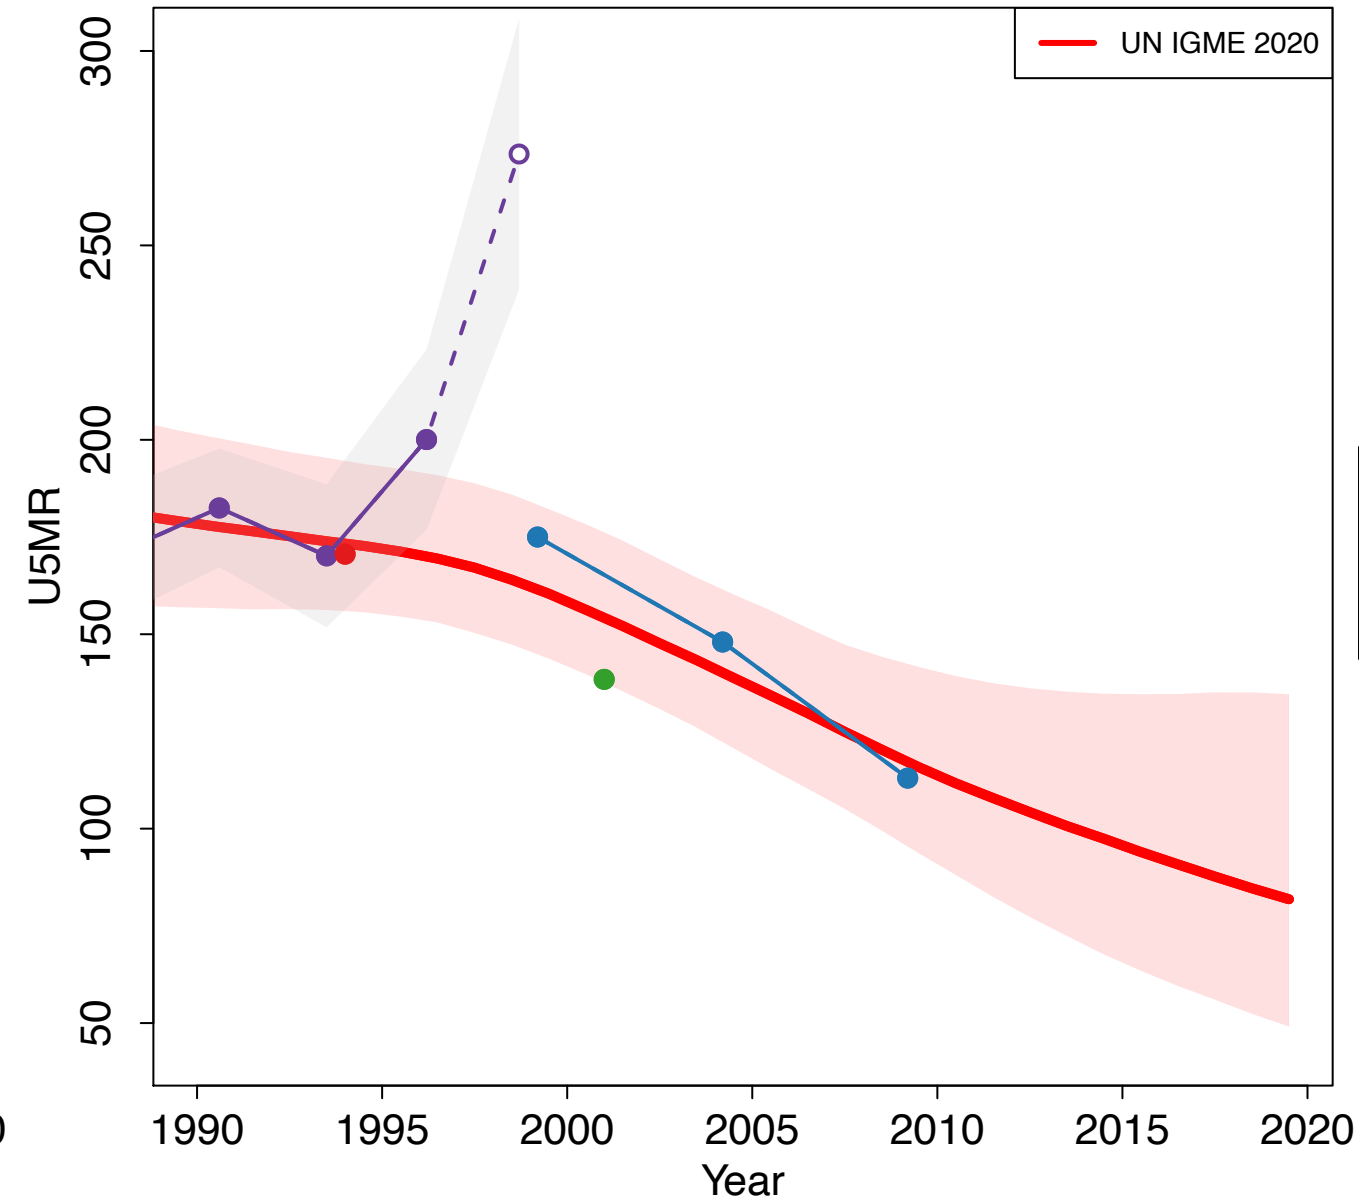

- Census 1983 (Others Household Deaths)
- Census 1994 (Others Household Deaths)
- Multiple Indicator Cluster Survey 2000 (MICS Indirect)
- Census 2001 (Others Household Deaths)
- Demographic and Health Survey 2011 (DHS Direct)



### Eritrea

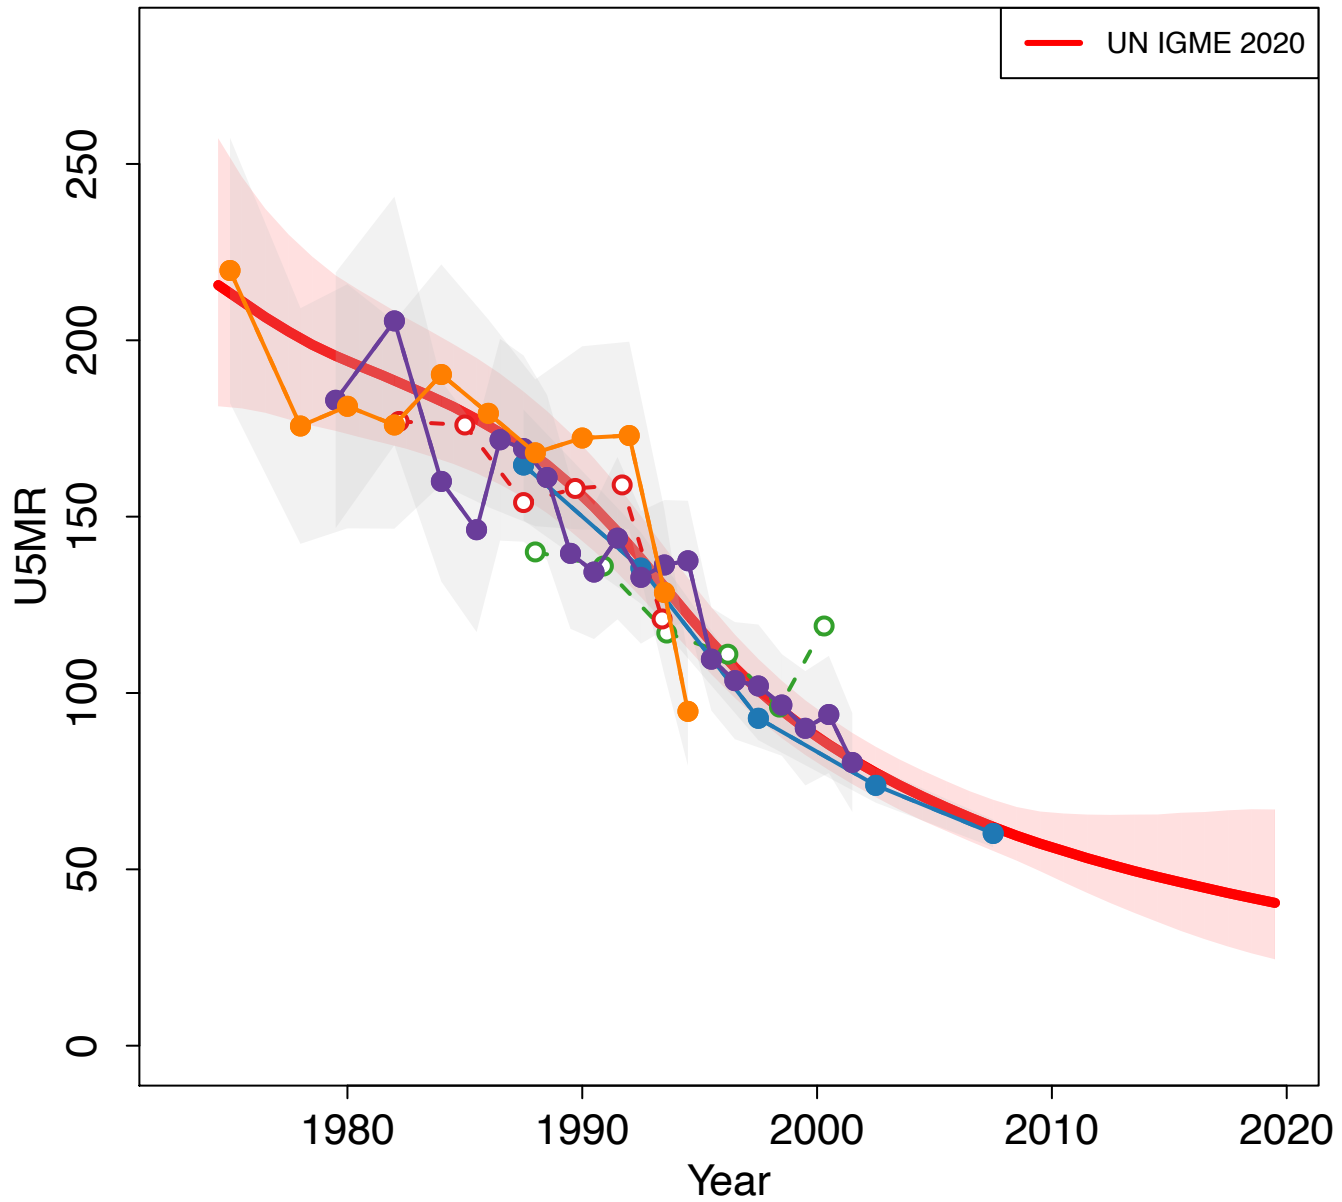

### Zoomed in

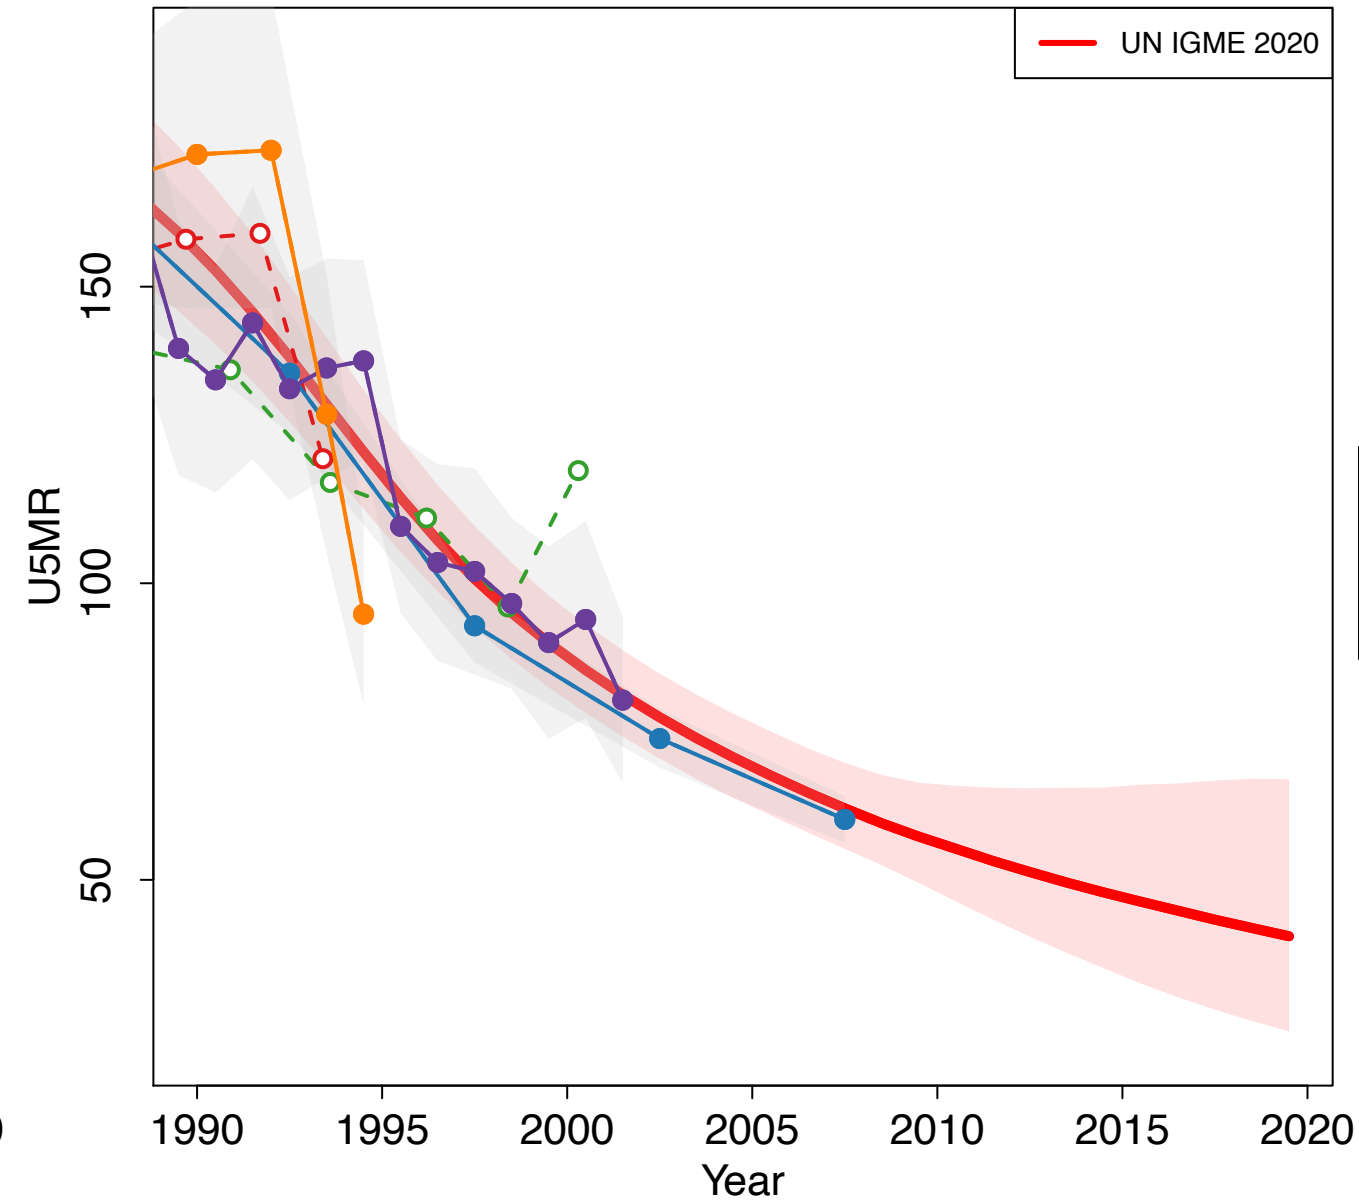

- Demographic and Health Survey 1995–1996 (DHS Direct)
- Demographic and Health Survey 1995–1996 (DHS Indirect)
- Demographic and Health Survey 2002 (DHS Direct)
- Demographic and Health Survey 2002 (DHS Indirect)
- Population and Health Survey 2010 (Other DHS Direct)

### Estonia

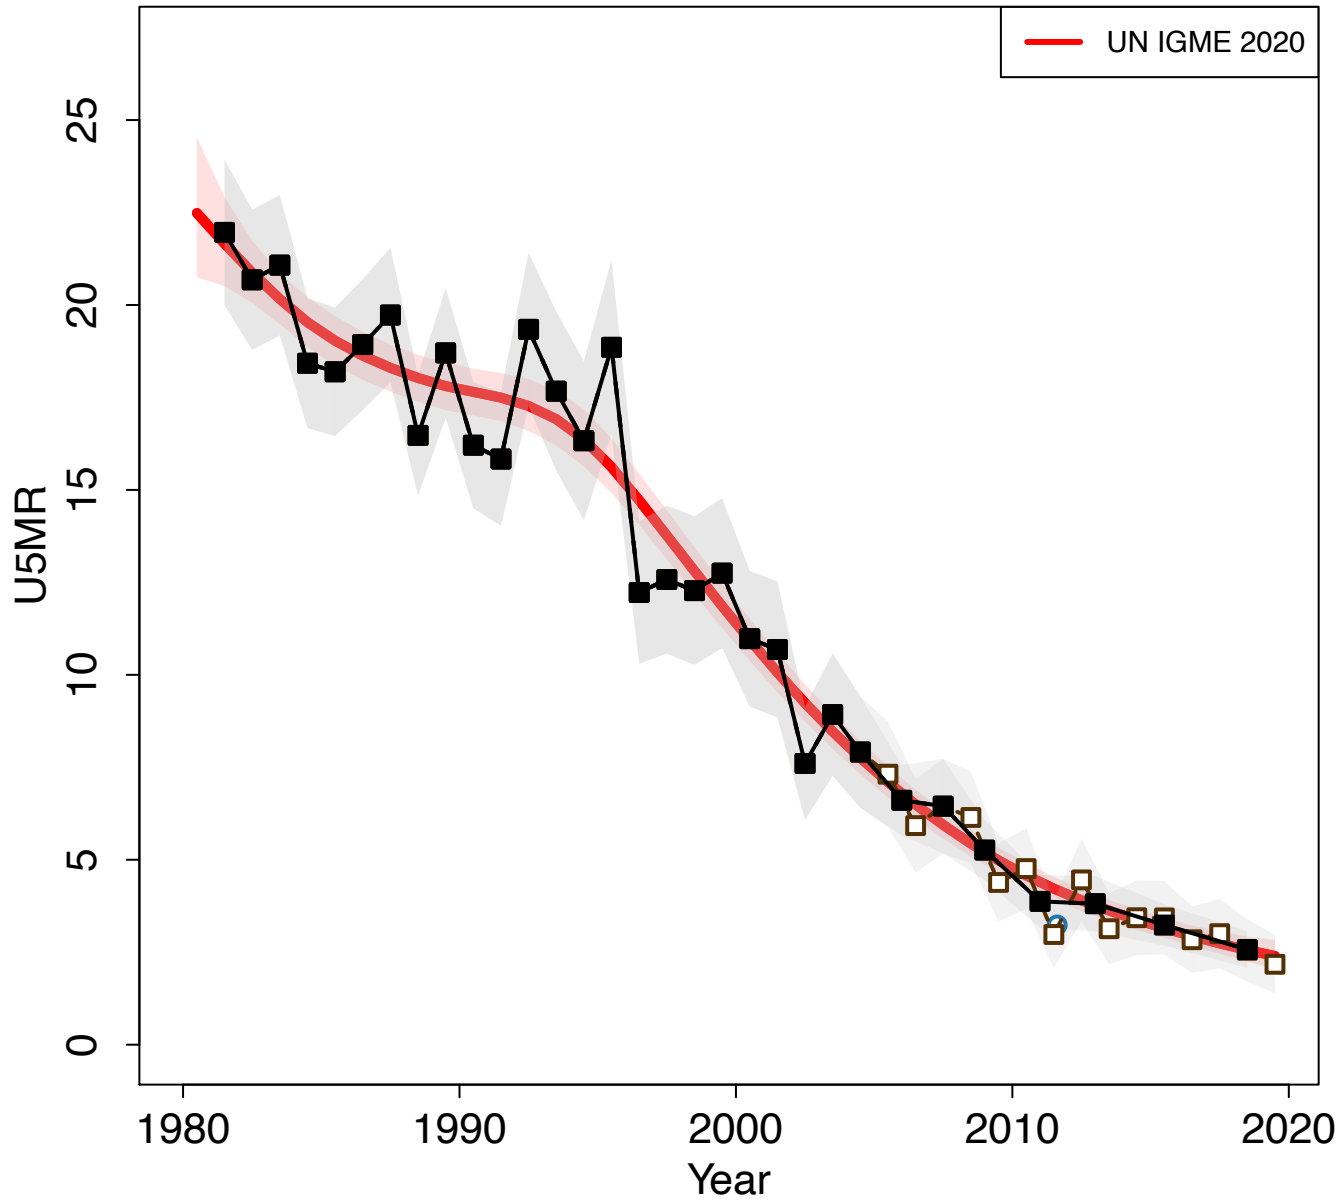

### Zoomed in

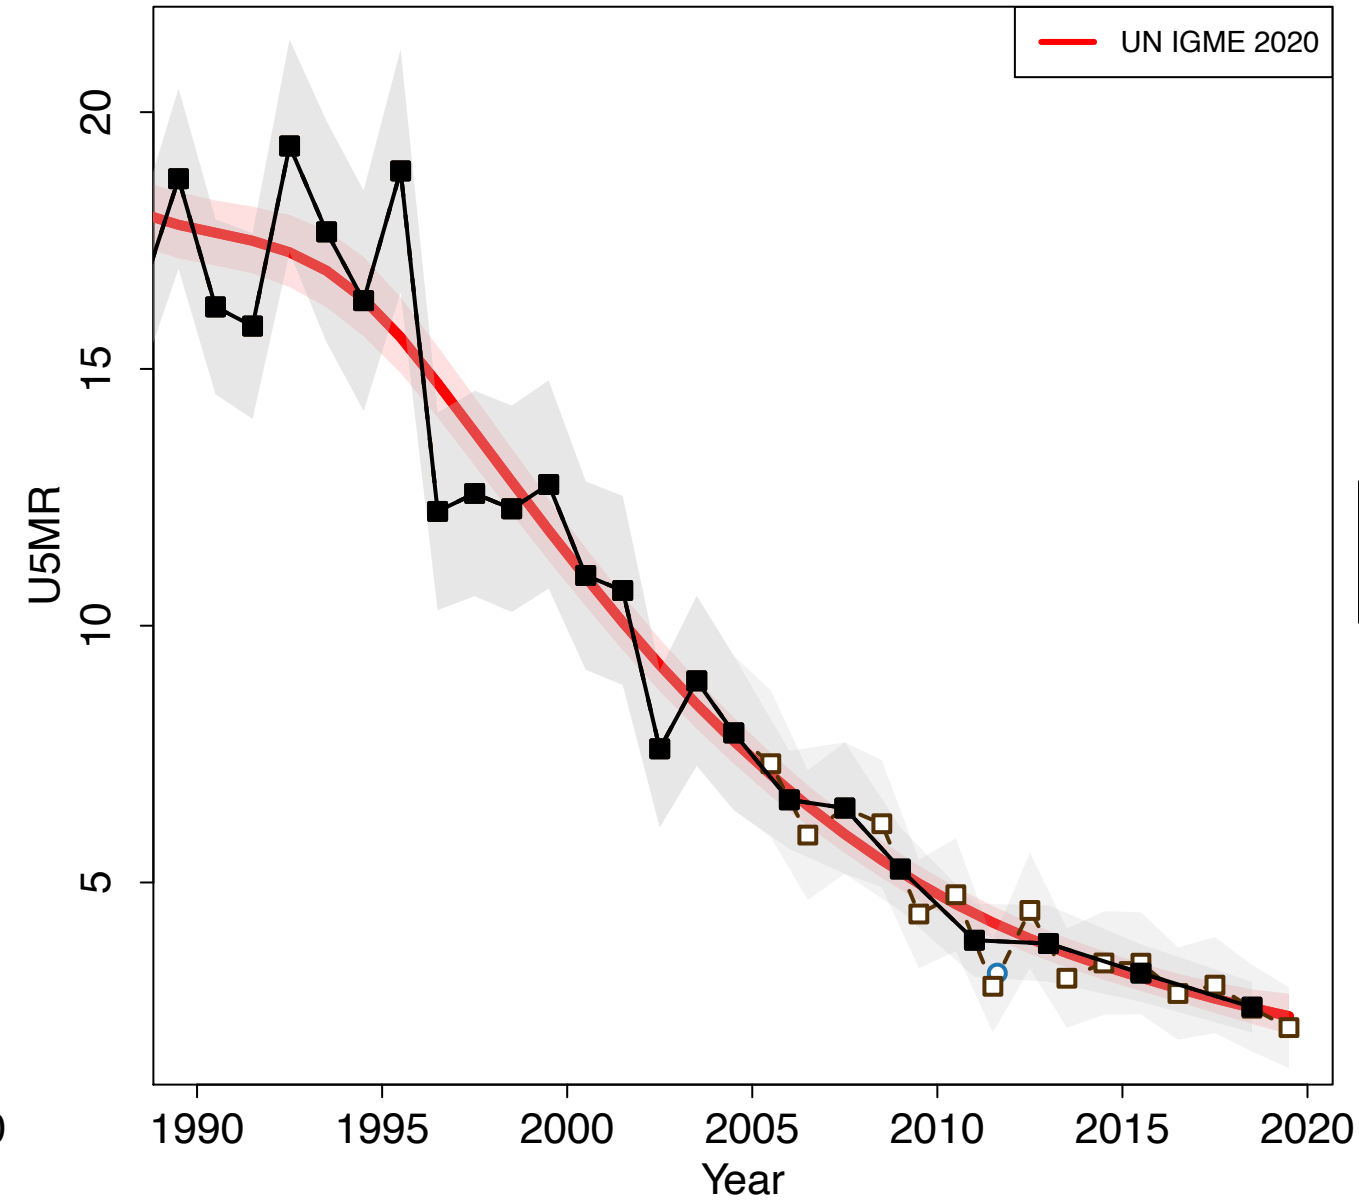

### Ethiopia

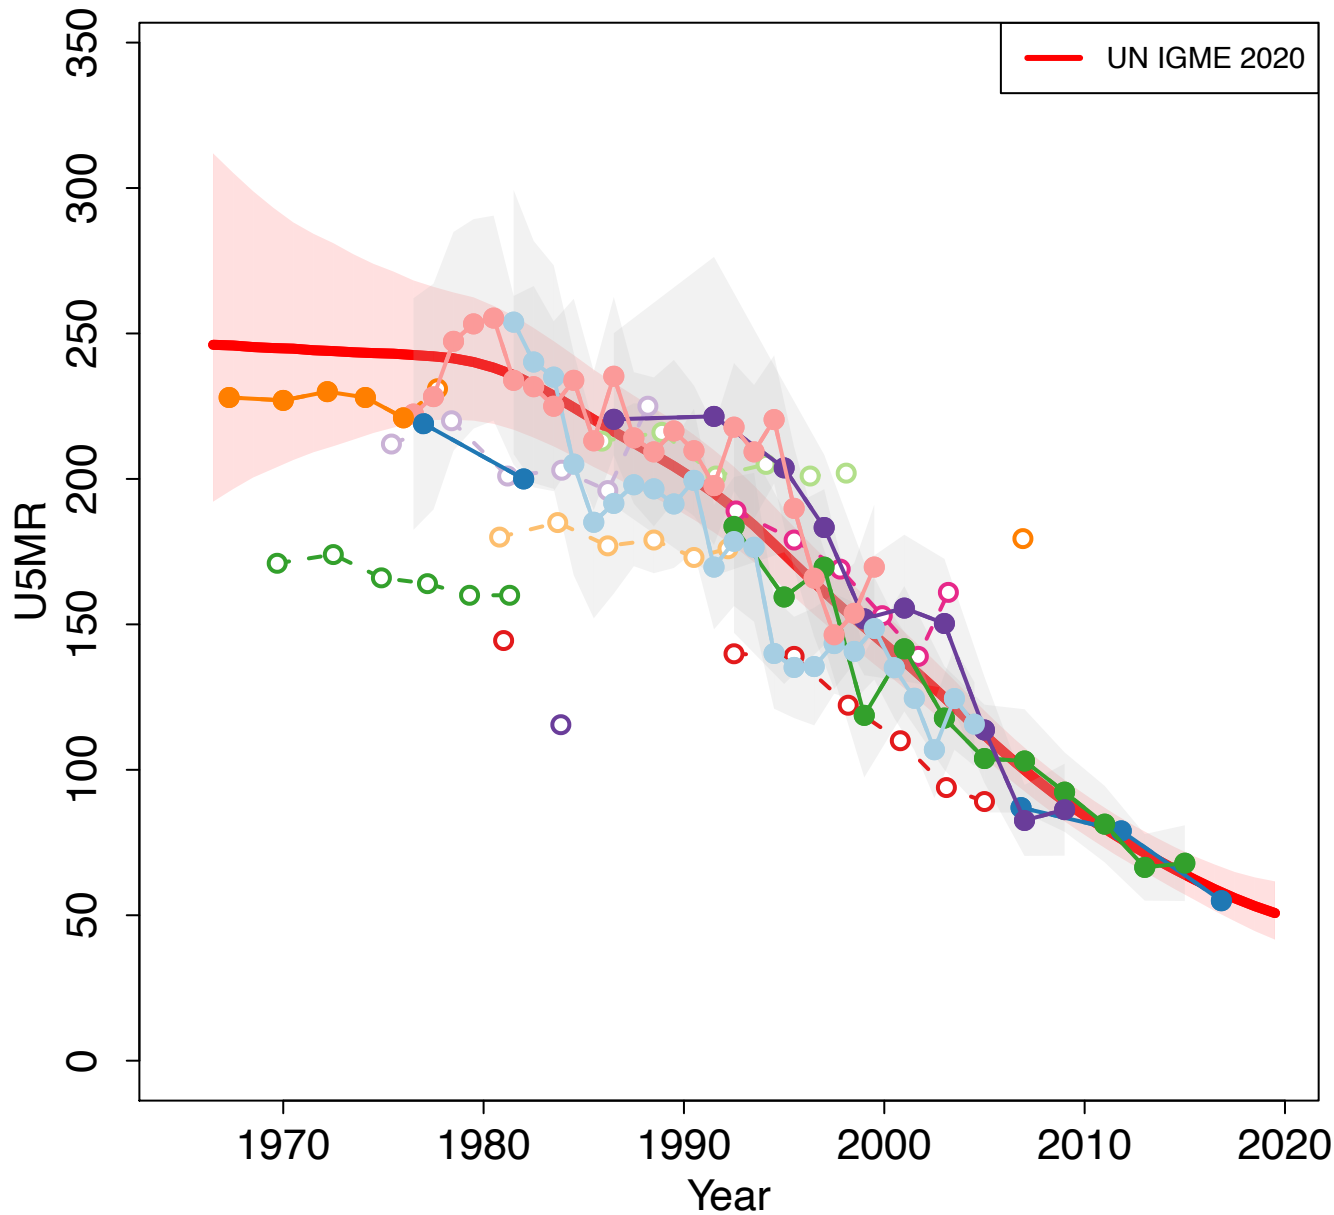

### Zoomed in

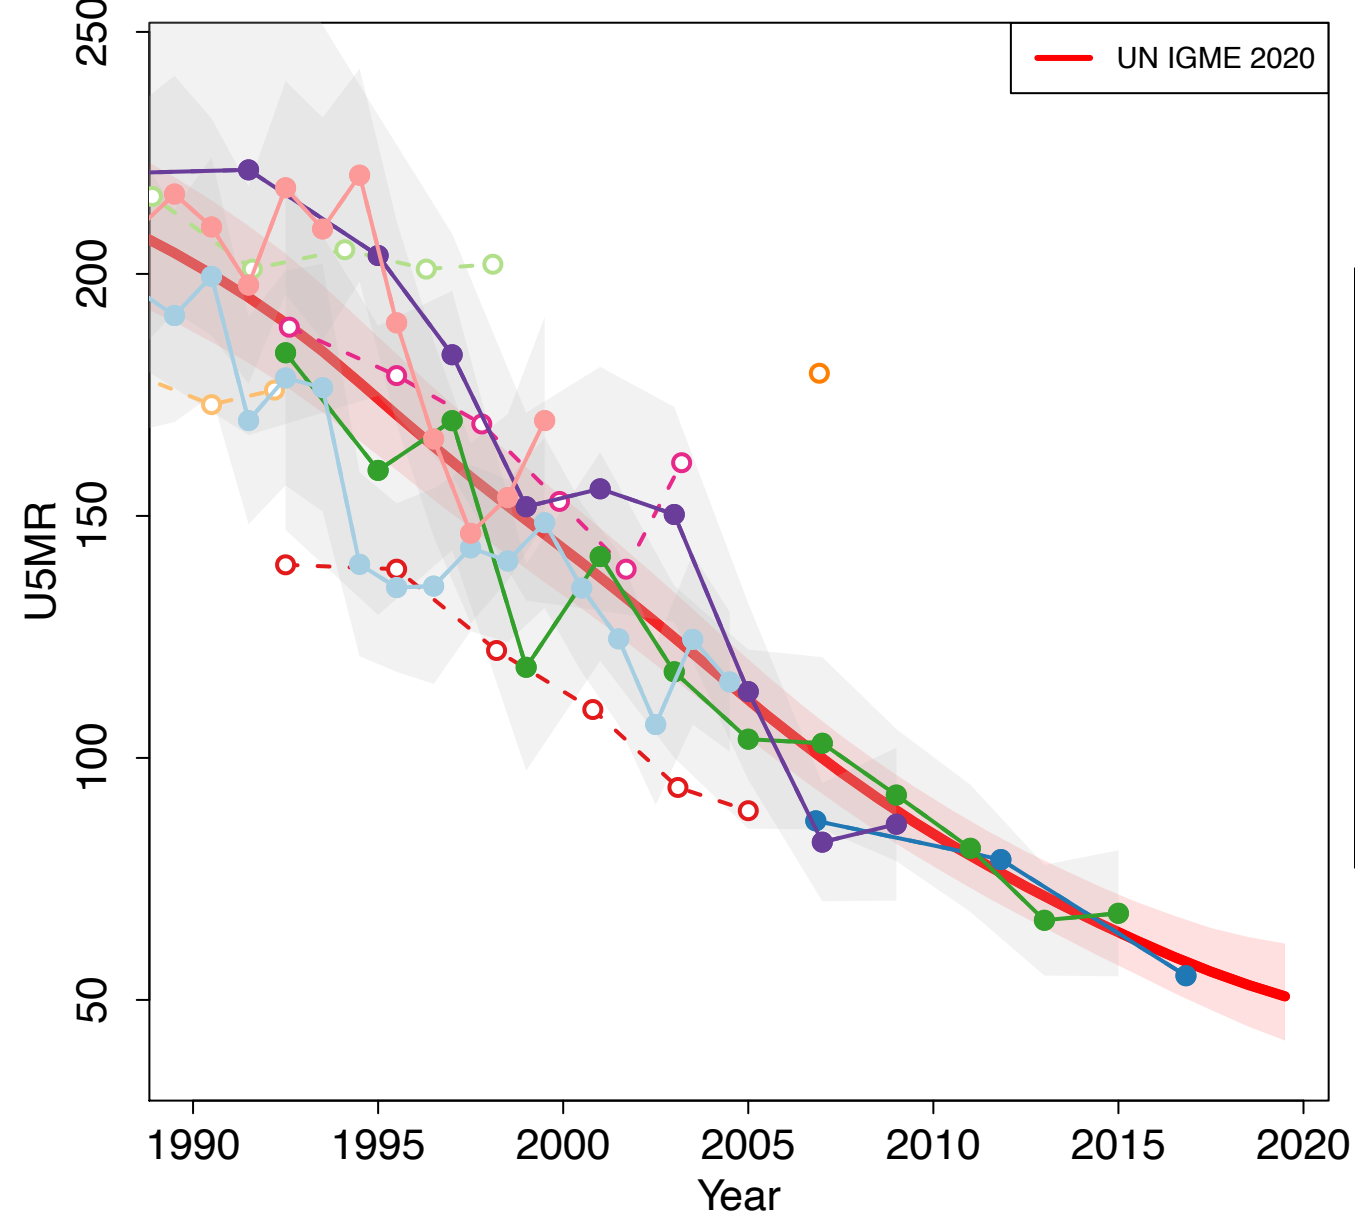

- Demographic Survey 1981 (Others Indirect)
- Demographic Survey 1981 (Others Household Deaths)
- Census 1984 (Others Household Deaths)
- Census 1984 (Census Indirect)
- National Family and Fertility Survey 1990 (Others Direct)
- National Family and Fertility Survey 1990 (Others Indirect)
- Census 1994 (Census Indirect)
- Demographic and Health Survey 2000 (DHS Direct)
- Demographic and Health Survey 2000 (DHS Indirect)
- Demographic and Health Survey 2005 (DHS Direct)
- Demographic and Health Survey 2005 (DHS Indirect)
- Census 2007 (Others Household Deaths)
- Census 2007 (Census Indirect)
- Demographic and Health Survey 2011 (DHS Direct)
- Demographic and Health Survey 2016 (DHS Direct)
- Mini Demographic and Health Survey 2019 (Other DHS Direct)

### Micronesia (Federated States of)

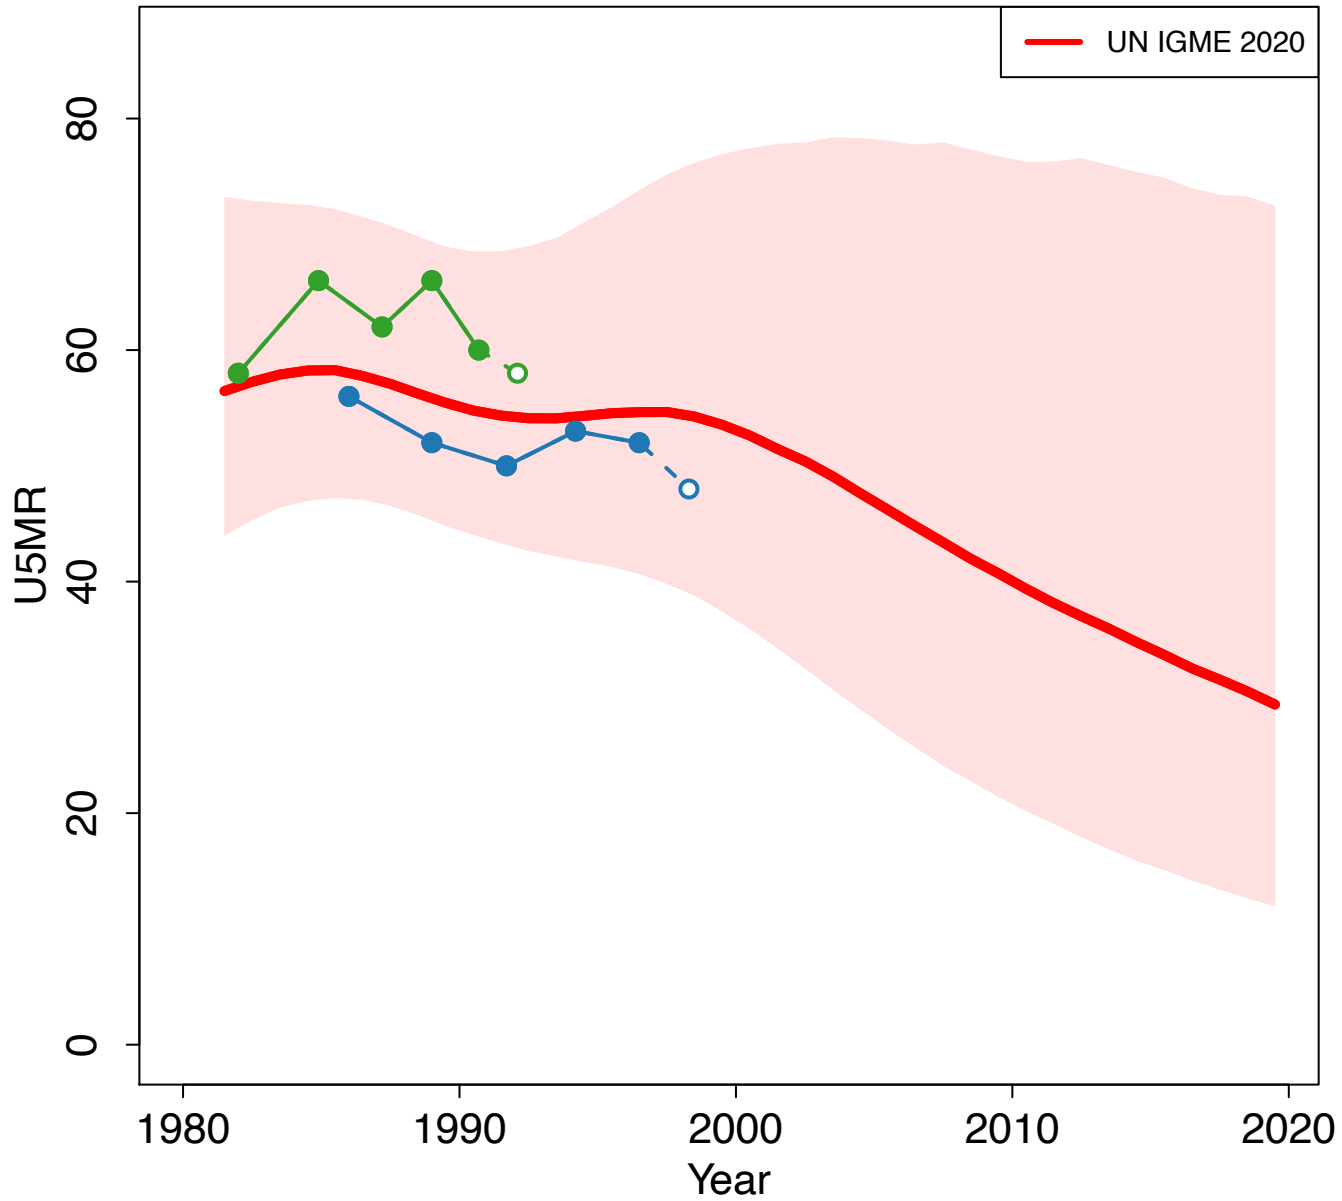

### Zoomed in

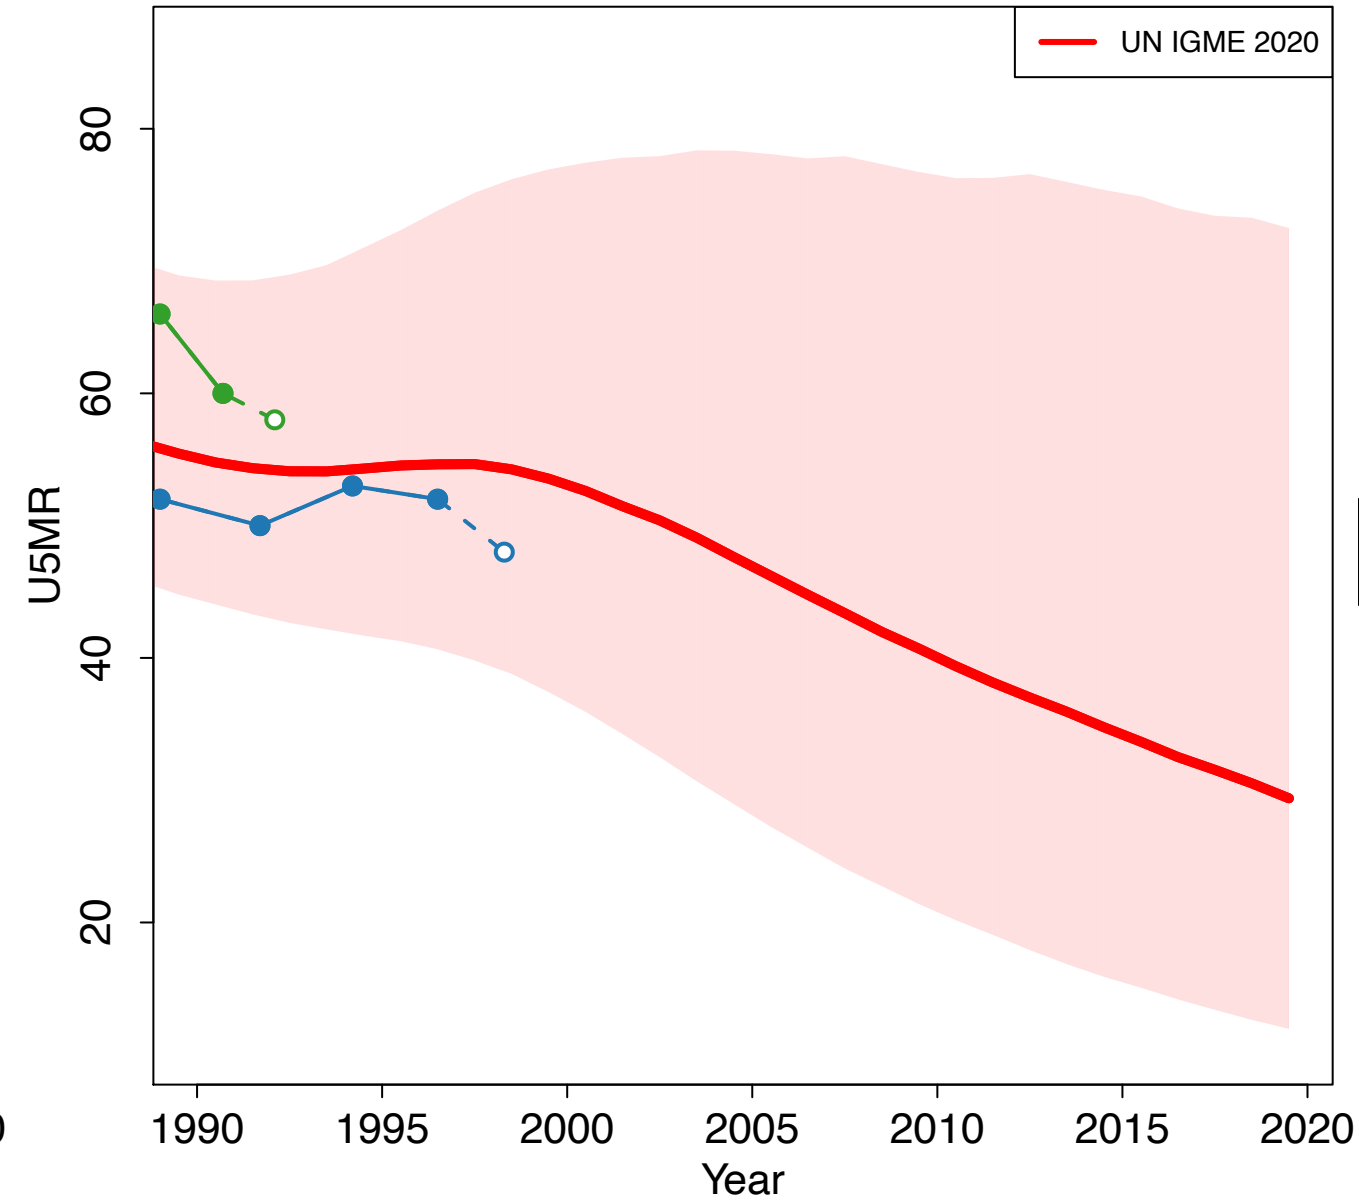

### Fiji

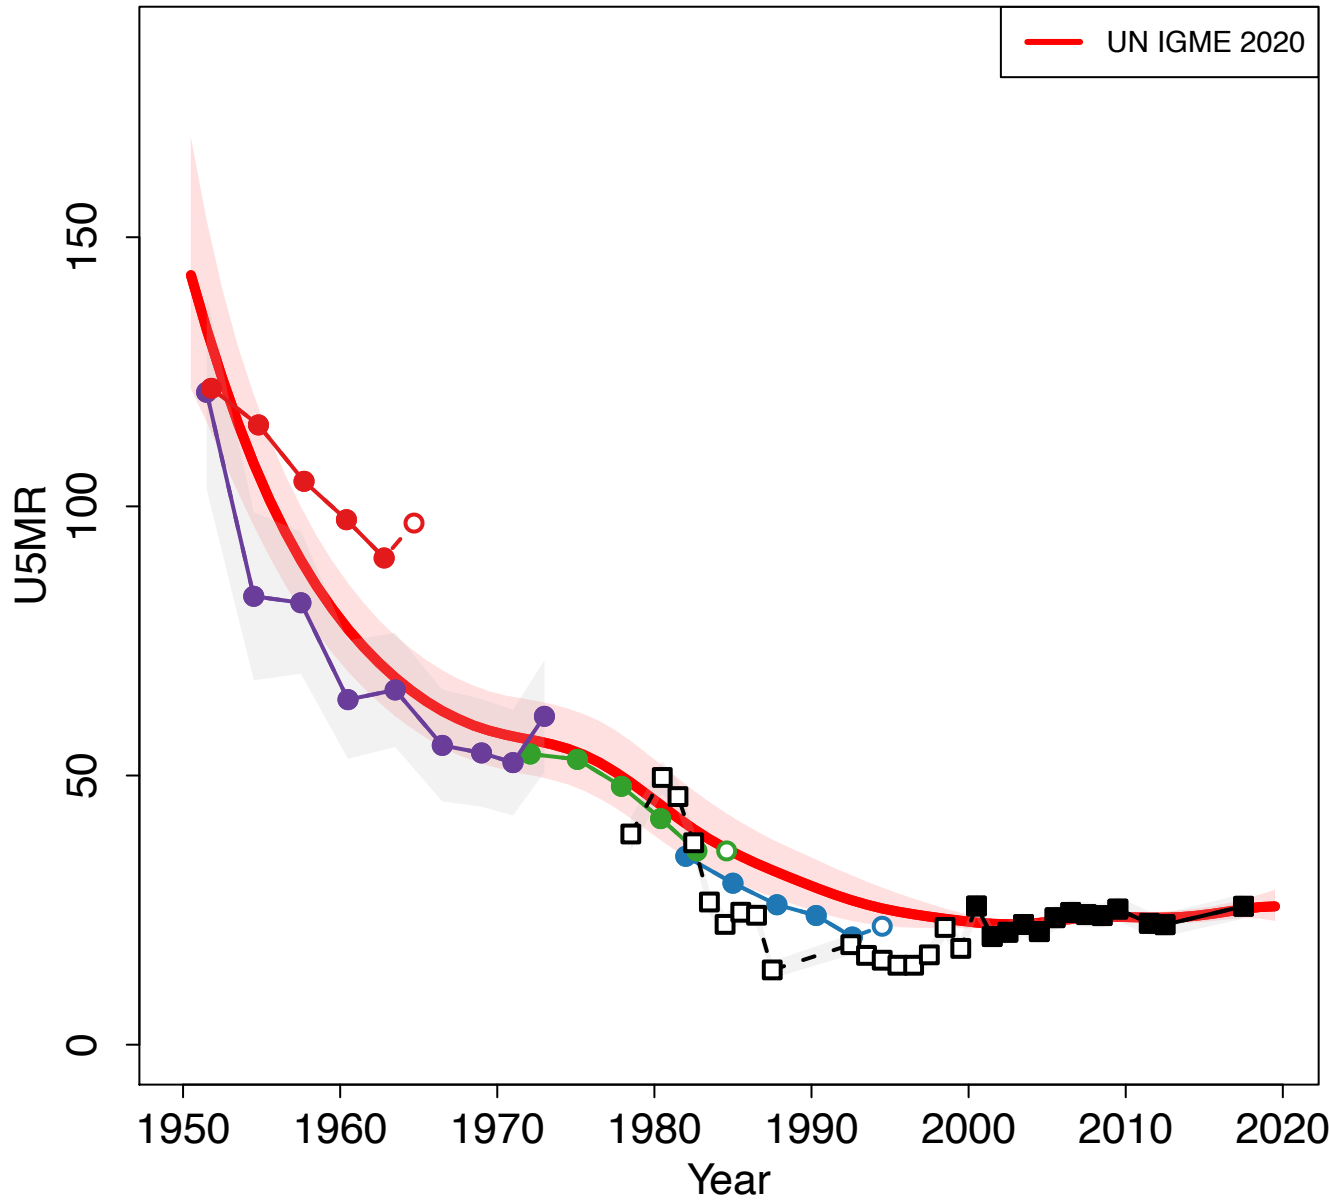

### Zoomed in

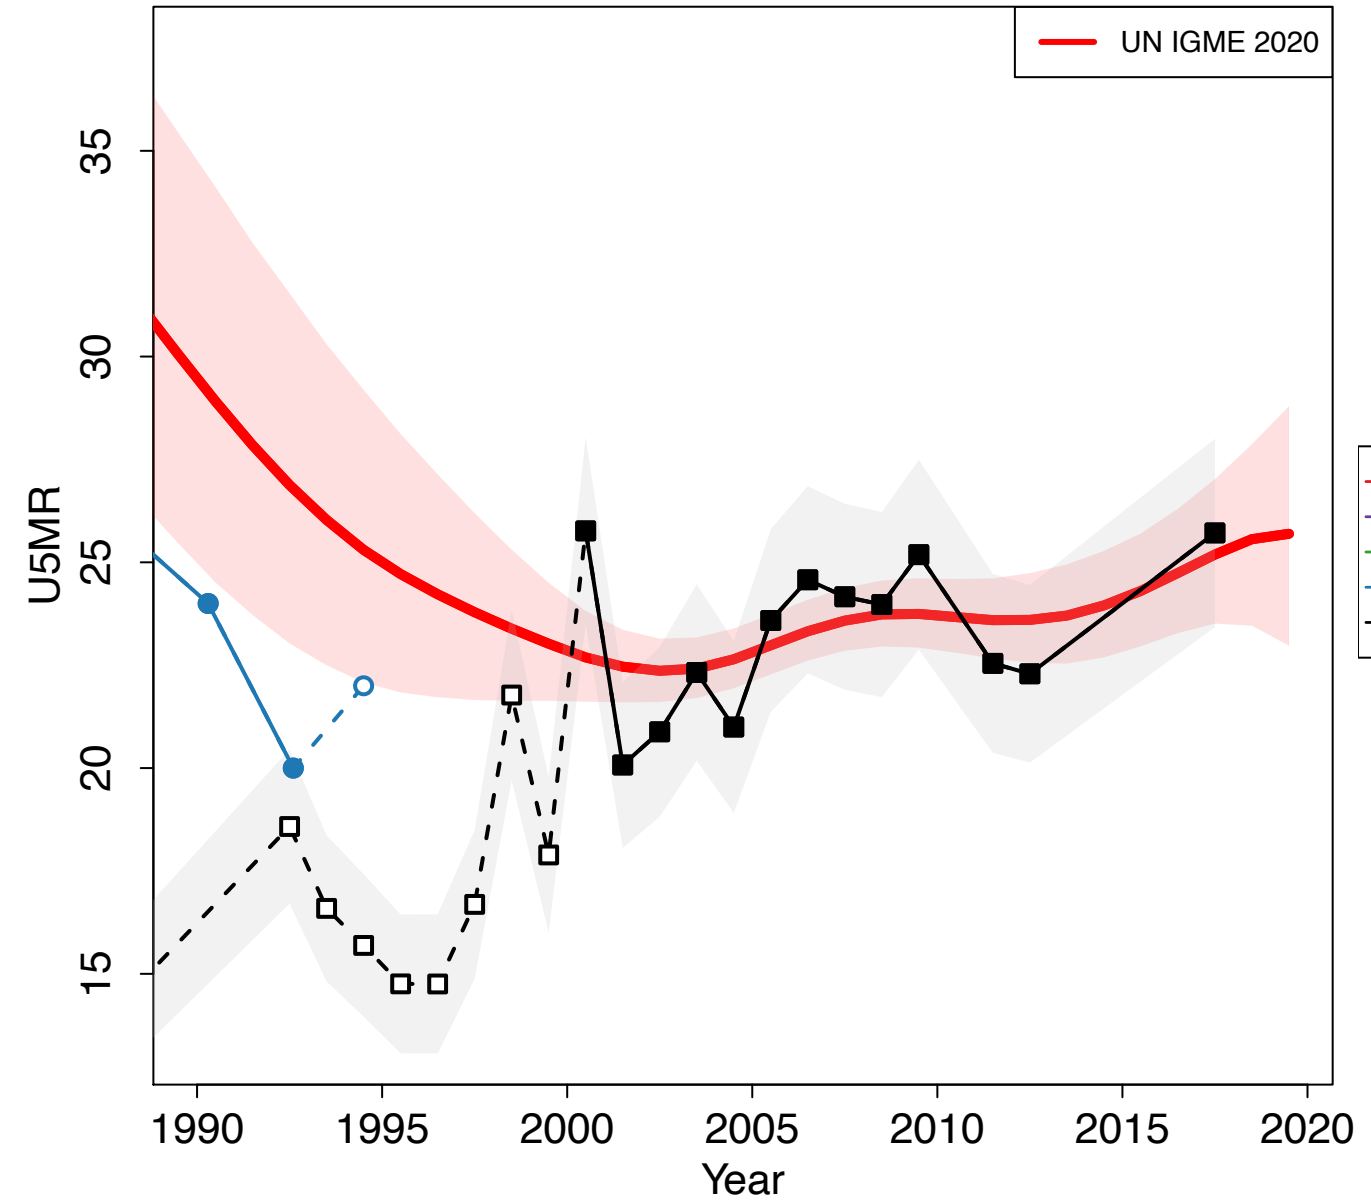

### Finland

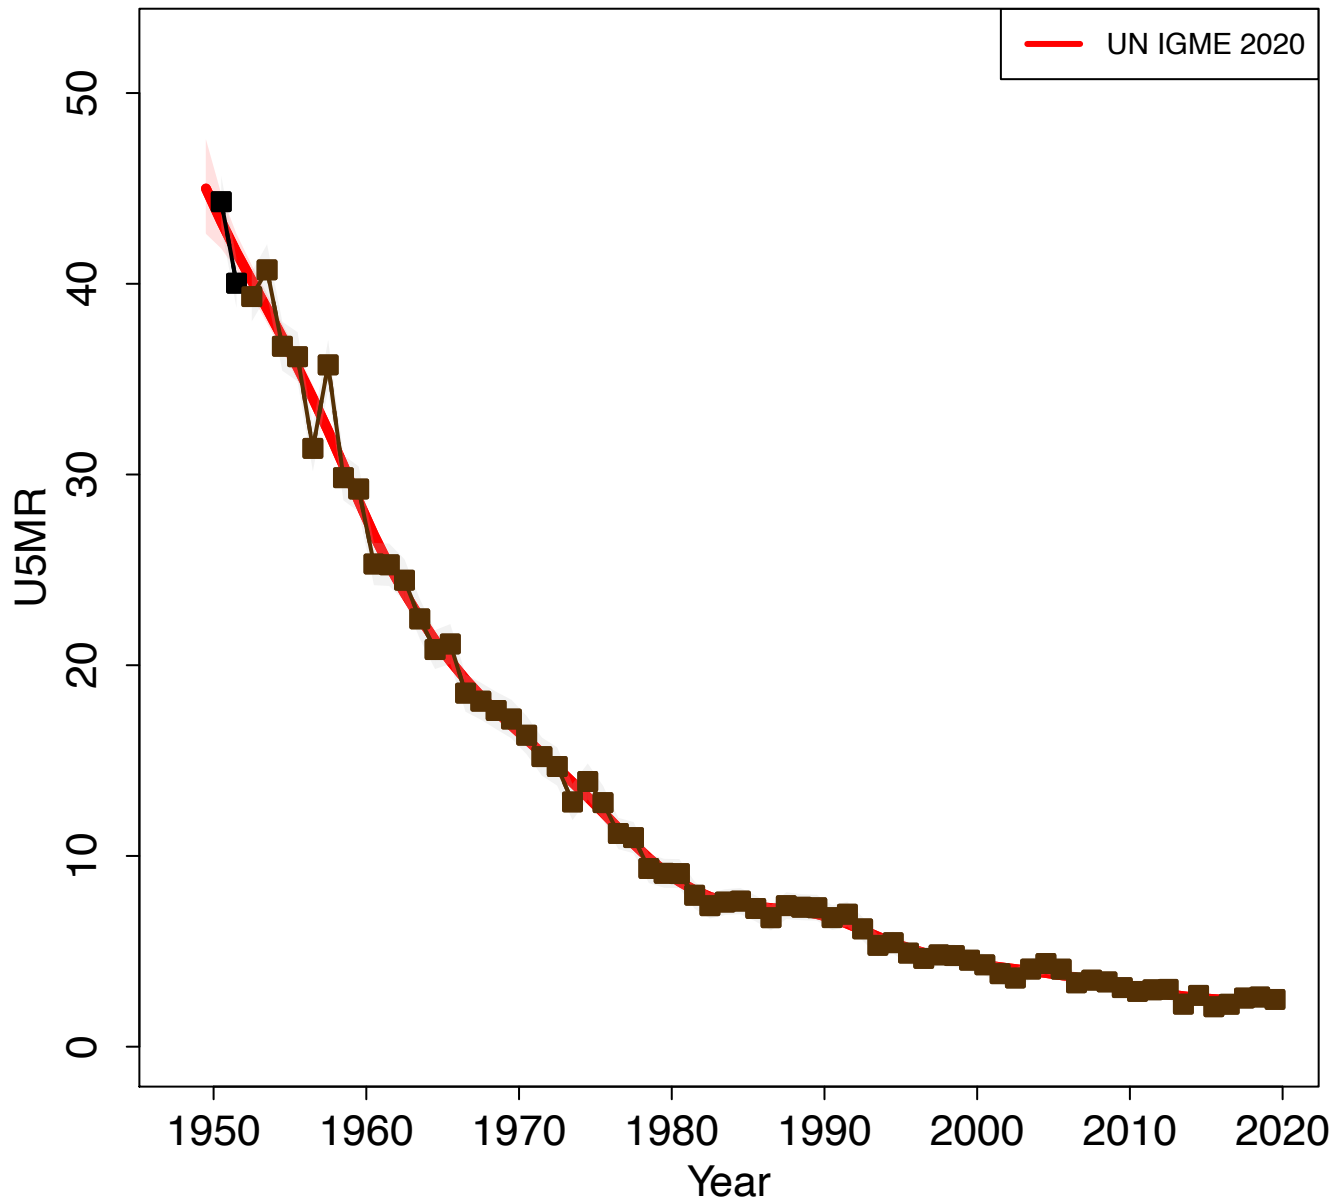

### Zoomed in

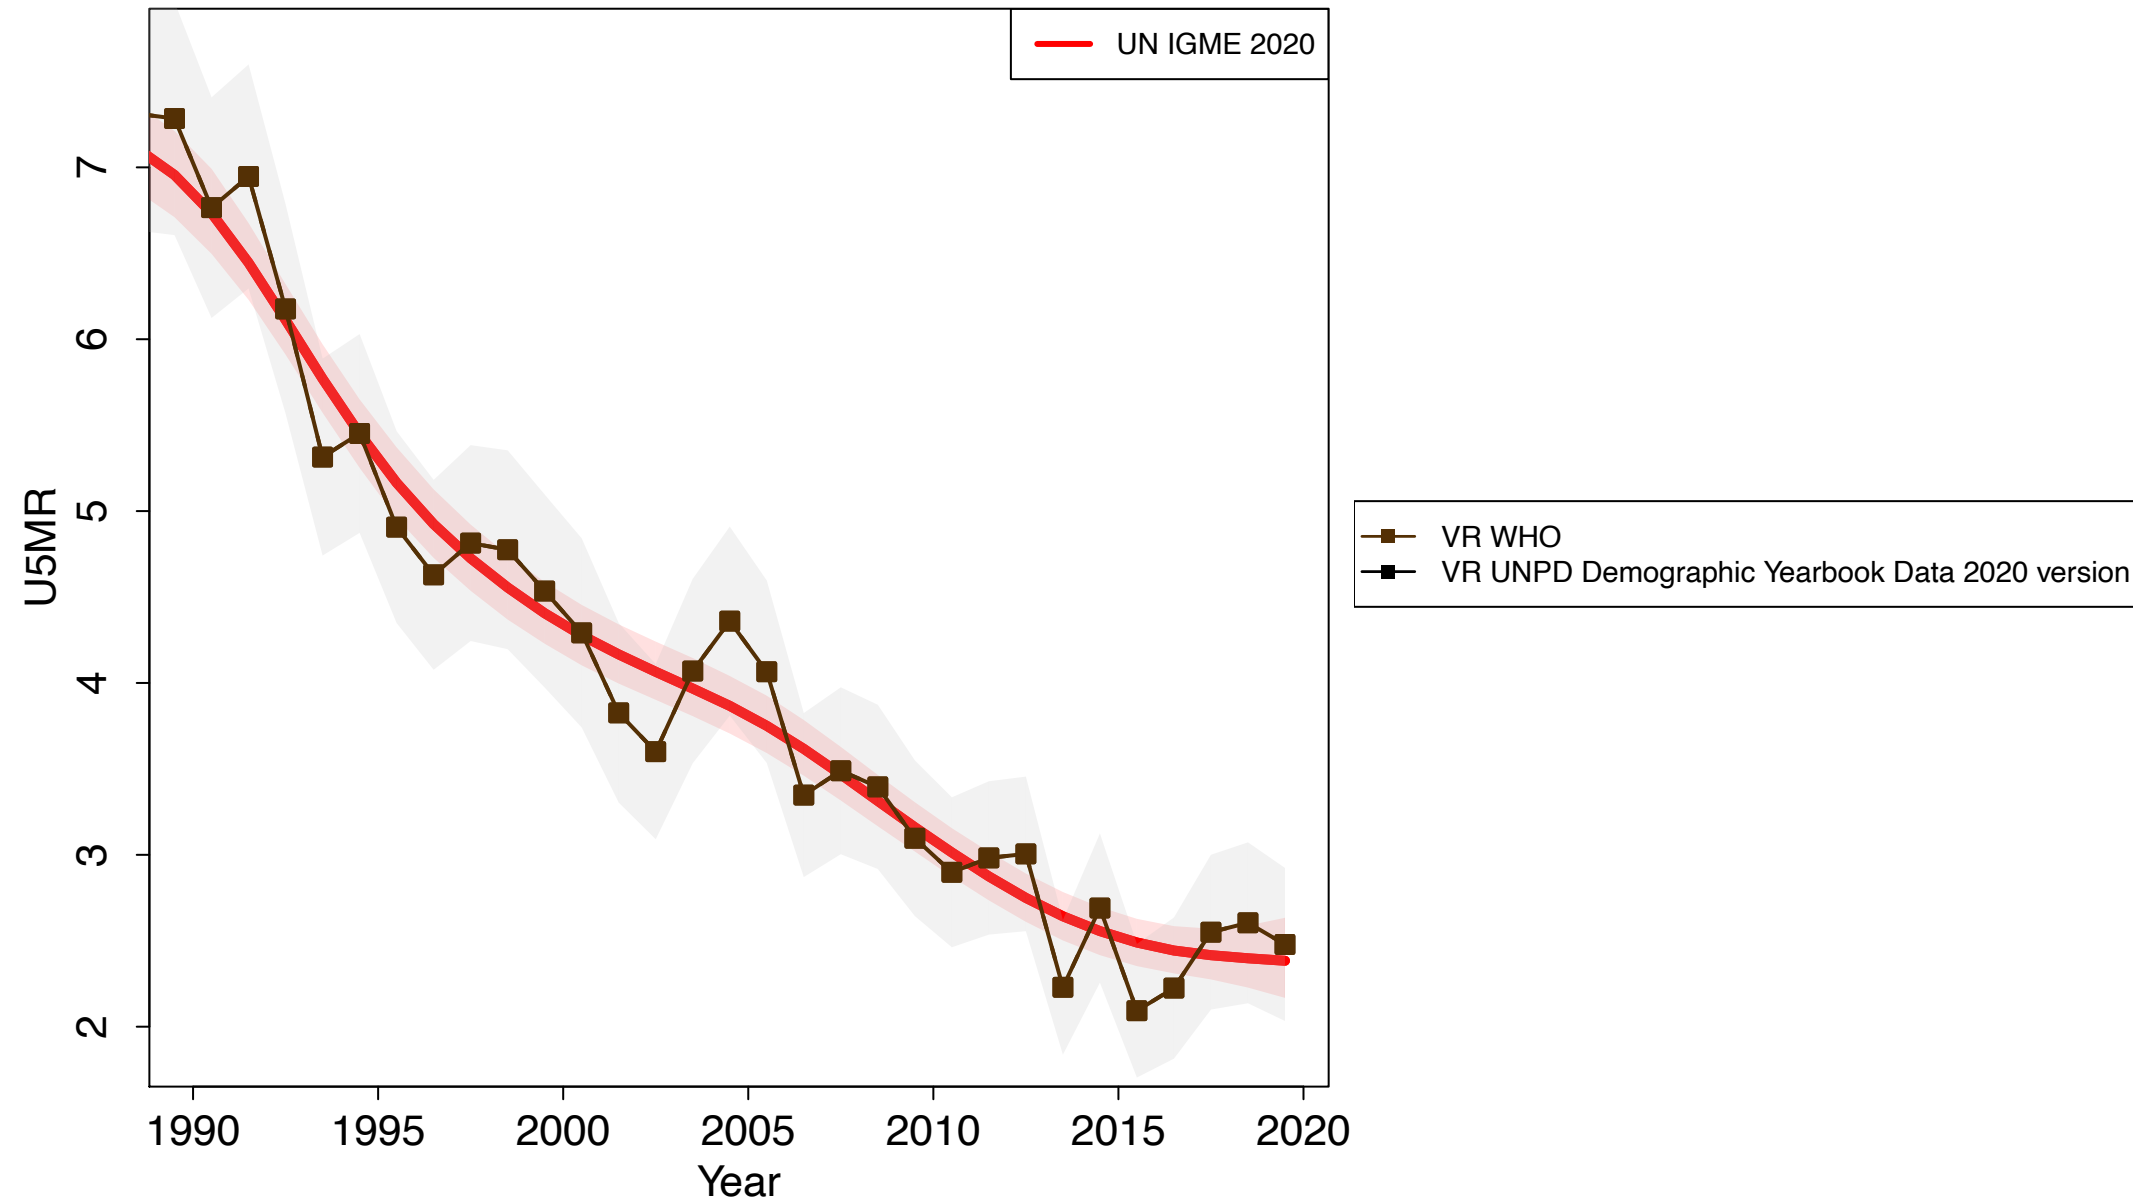

France

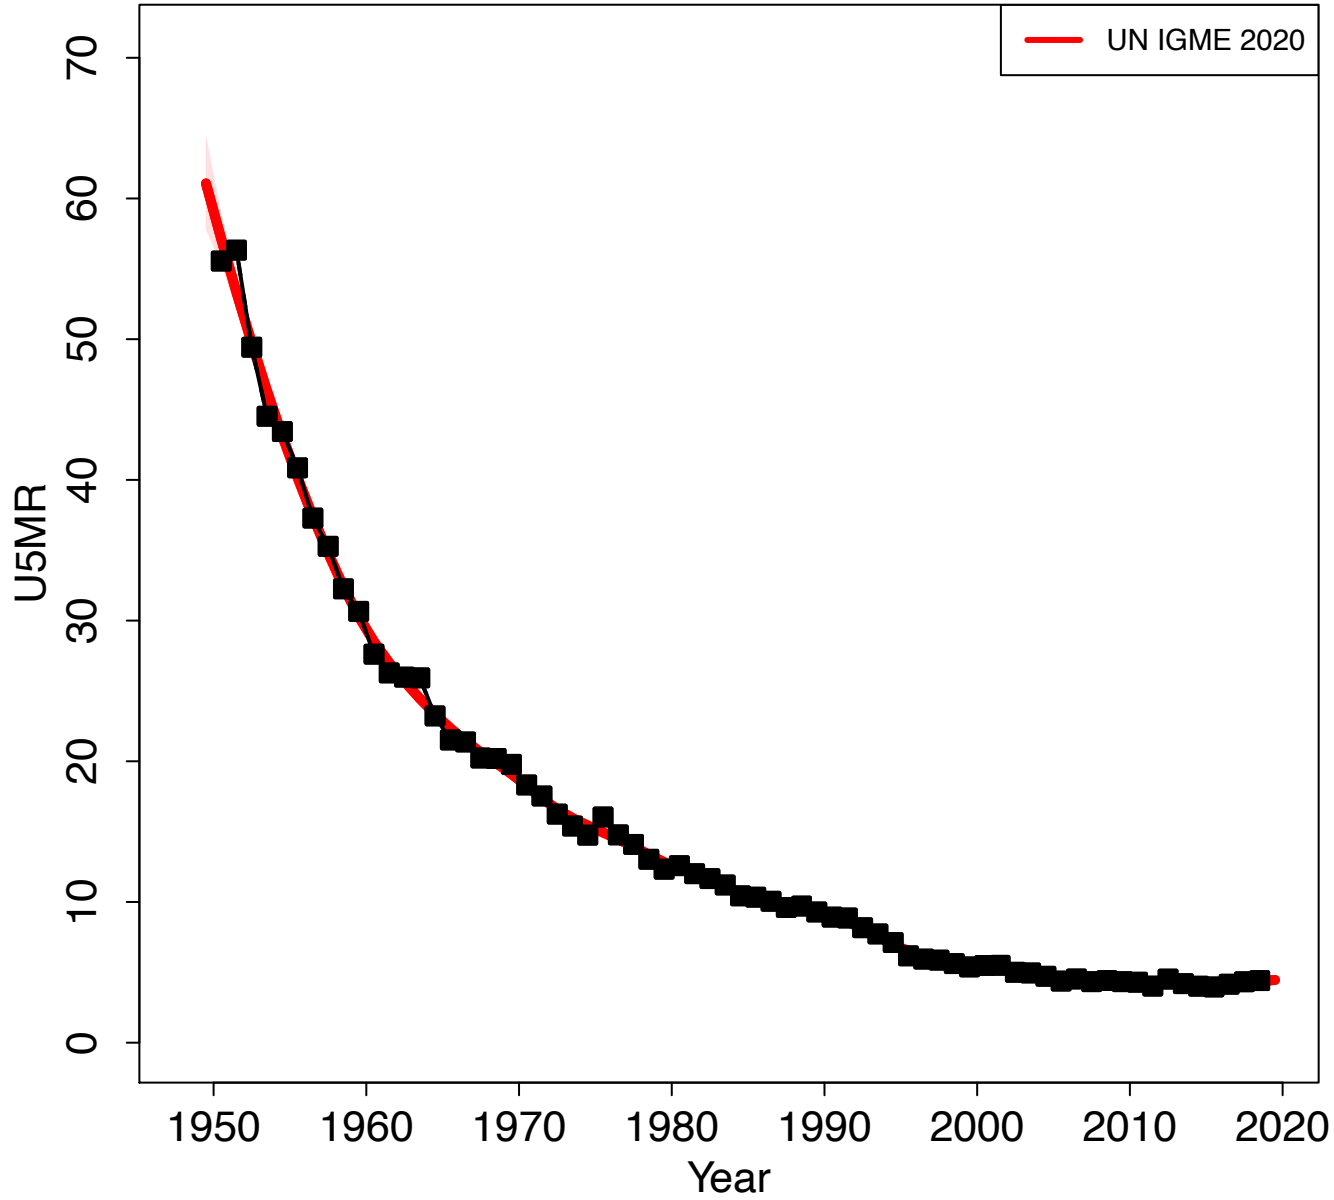

Zoomed in

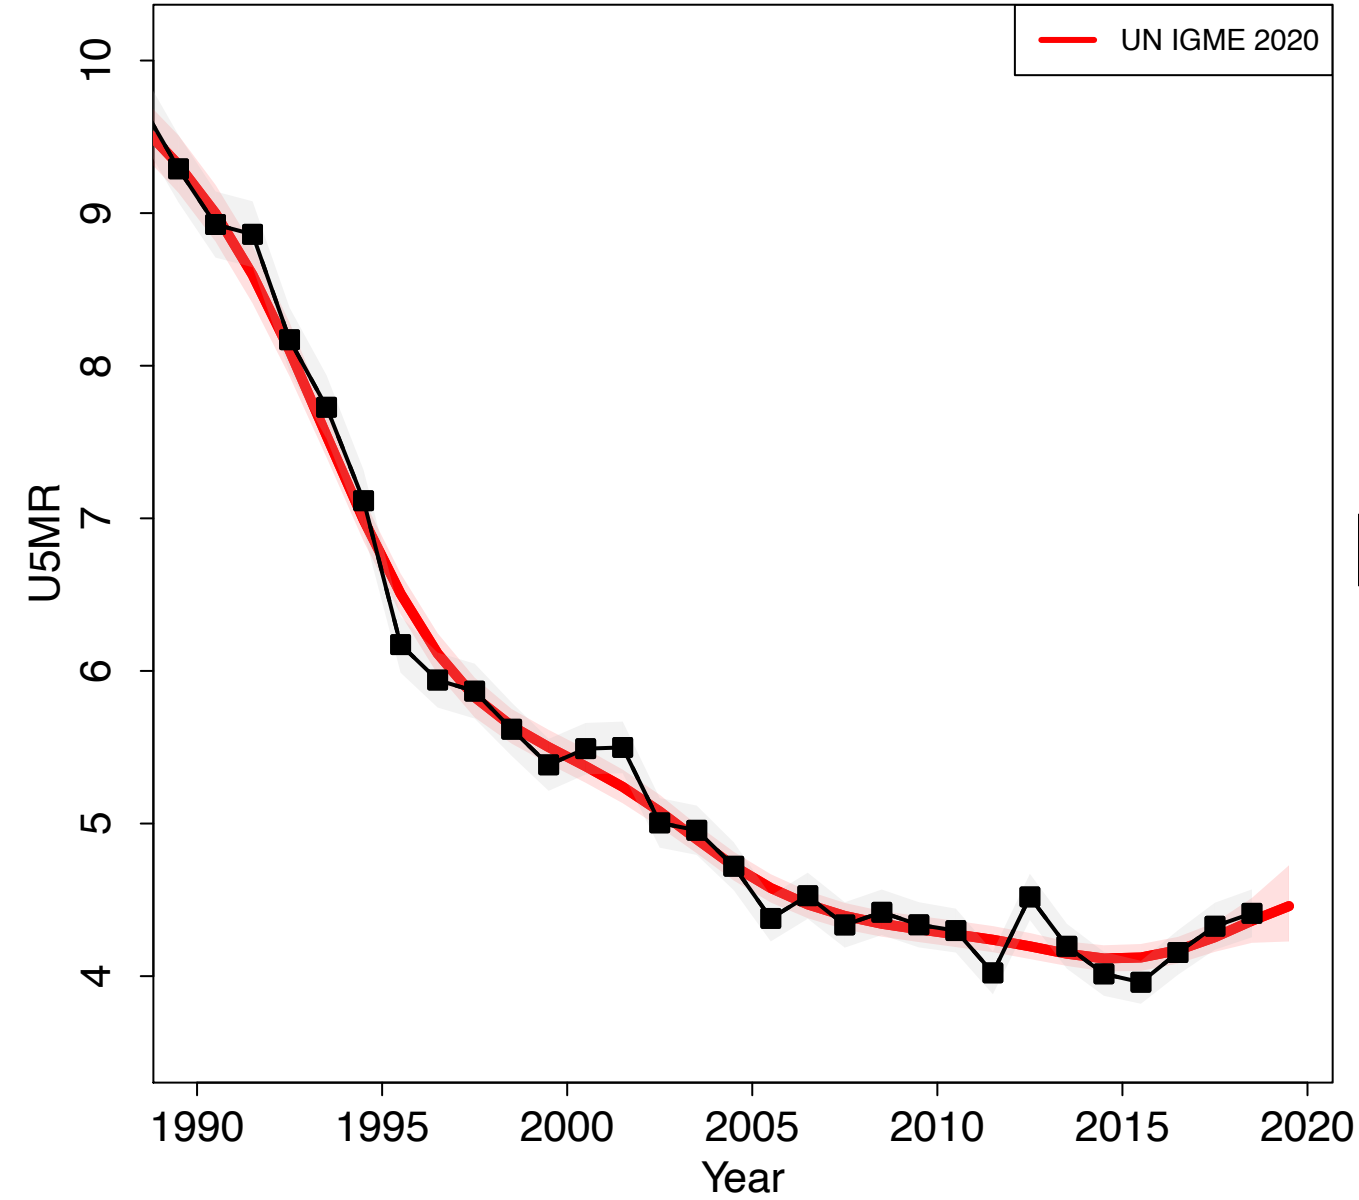

### Gabon

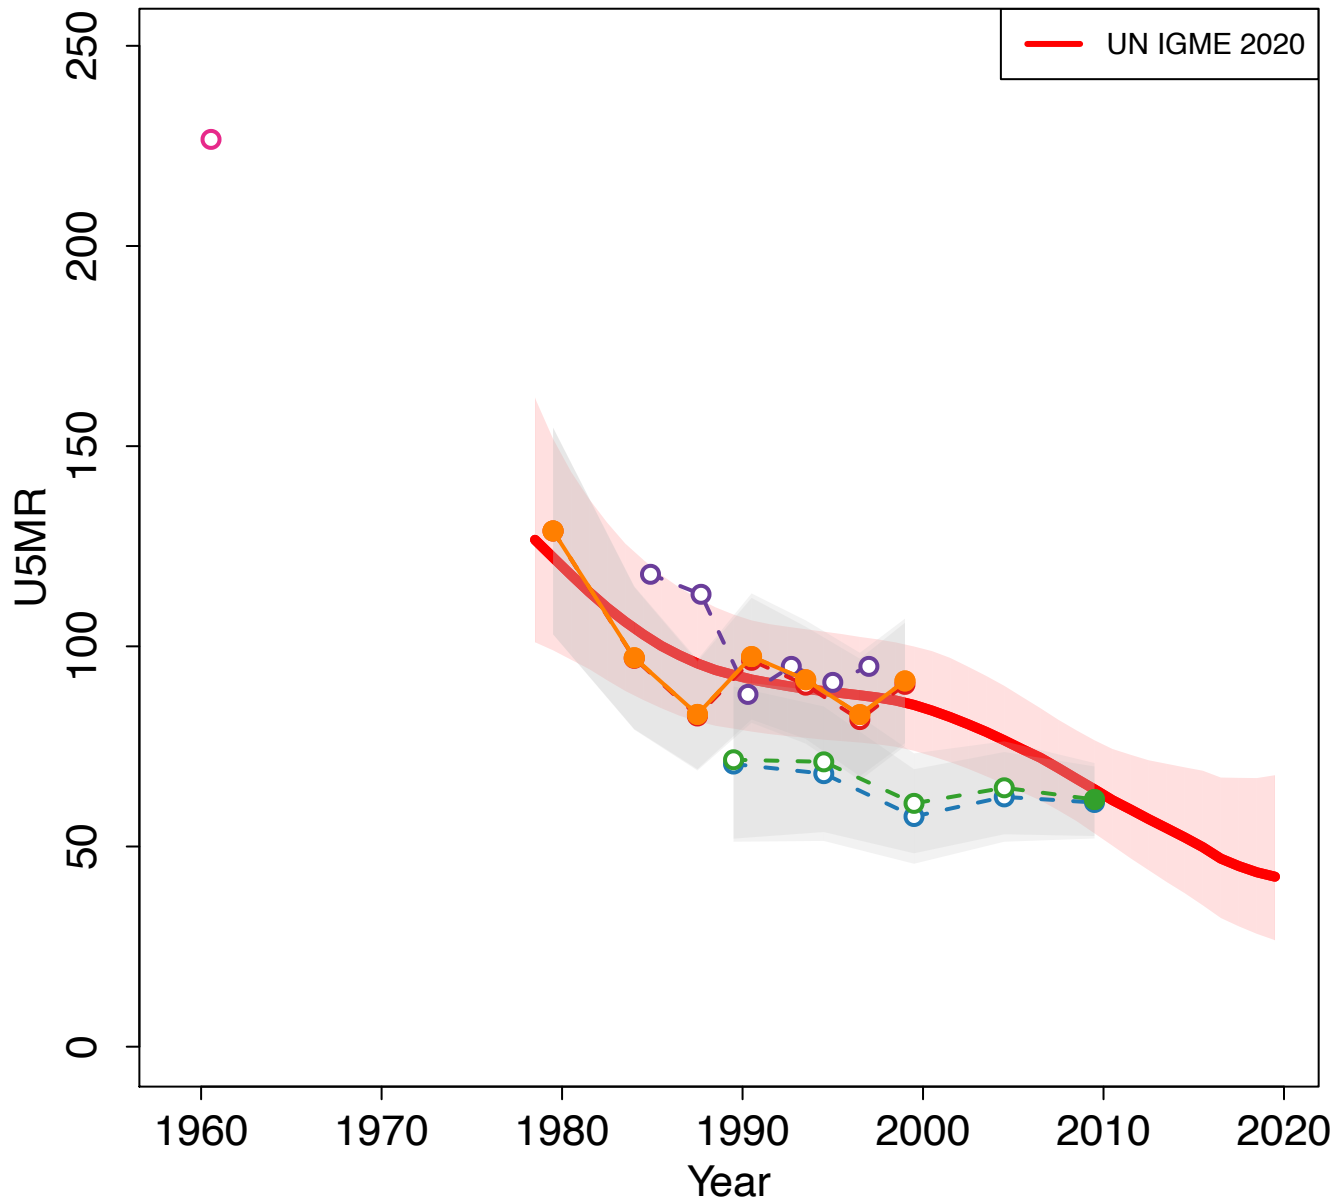

### Zoomed in

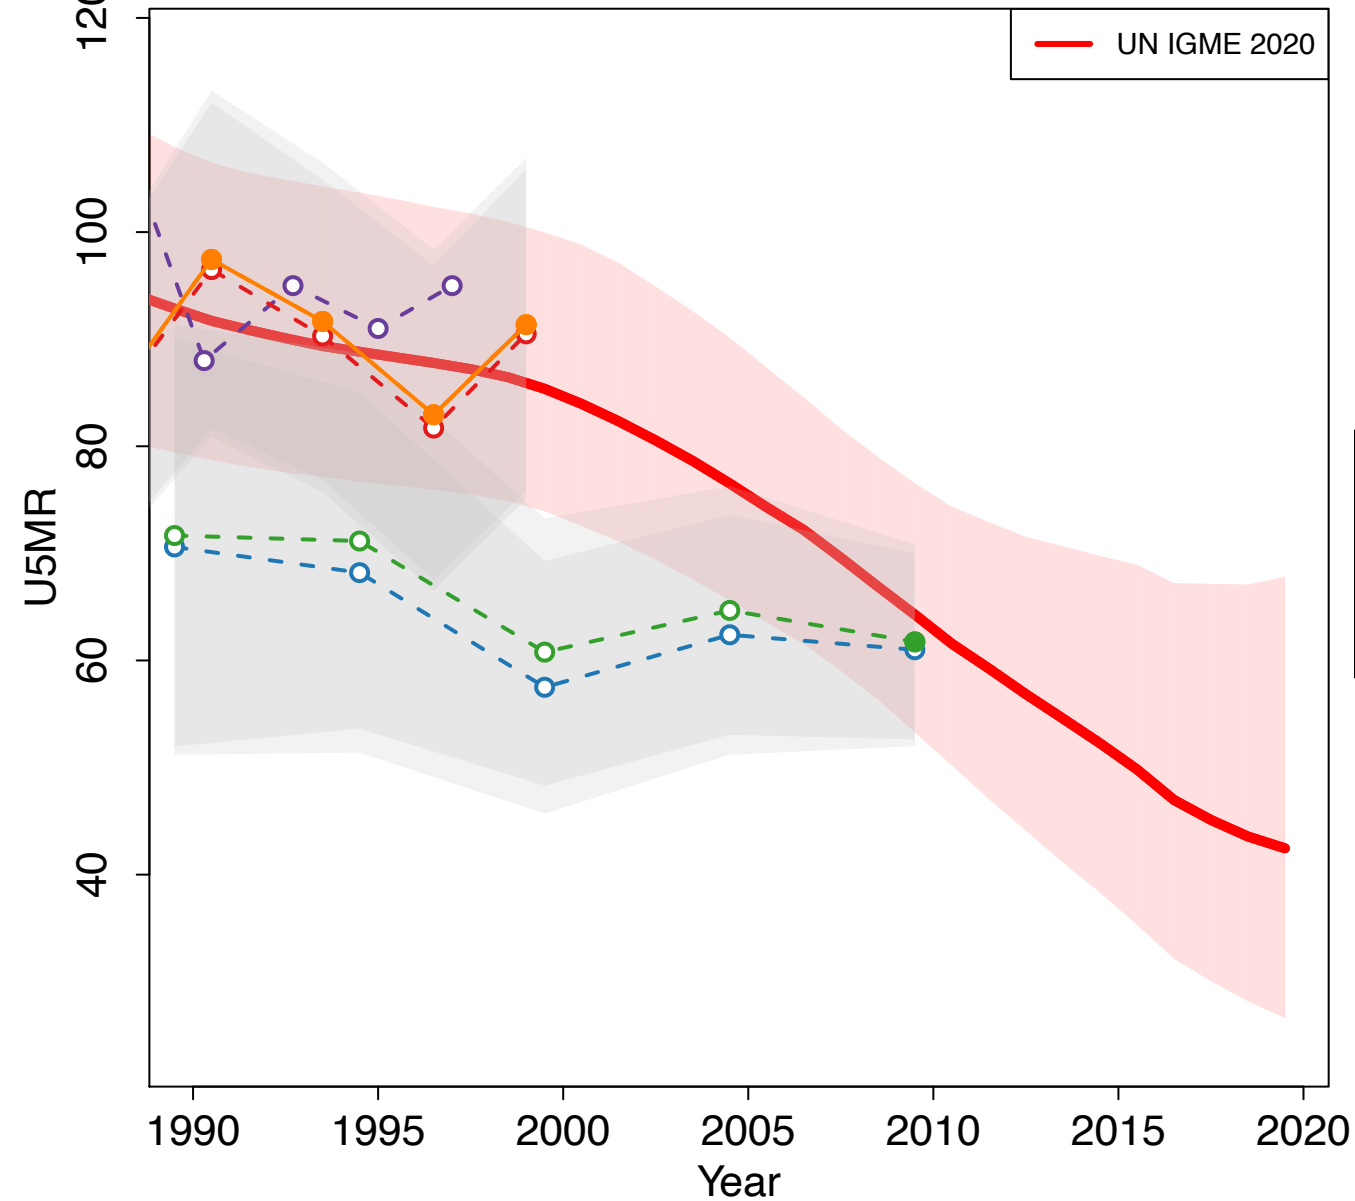

- Census 1960–1961 (Others Household Deaths)
- Demographic and Health Survey (MM adjusted) 2000 (DHS Direct)
- Demographic and Health Survey 2000 (DHS Direct)
- Demographic and Health Survey 2000 (DHS Indirect)
- Demographic and Health Survey (MM adjusted) 2012 (DHS Direct)
- Demographic and Health Survey 2012 (DHS Direct)





# Georgia

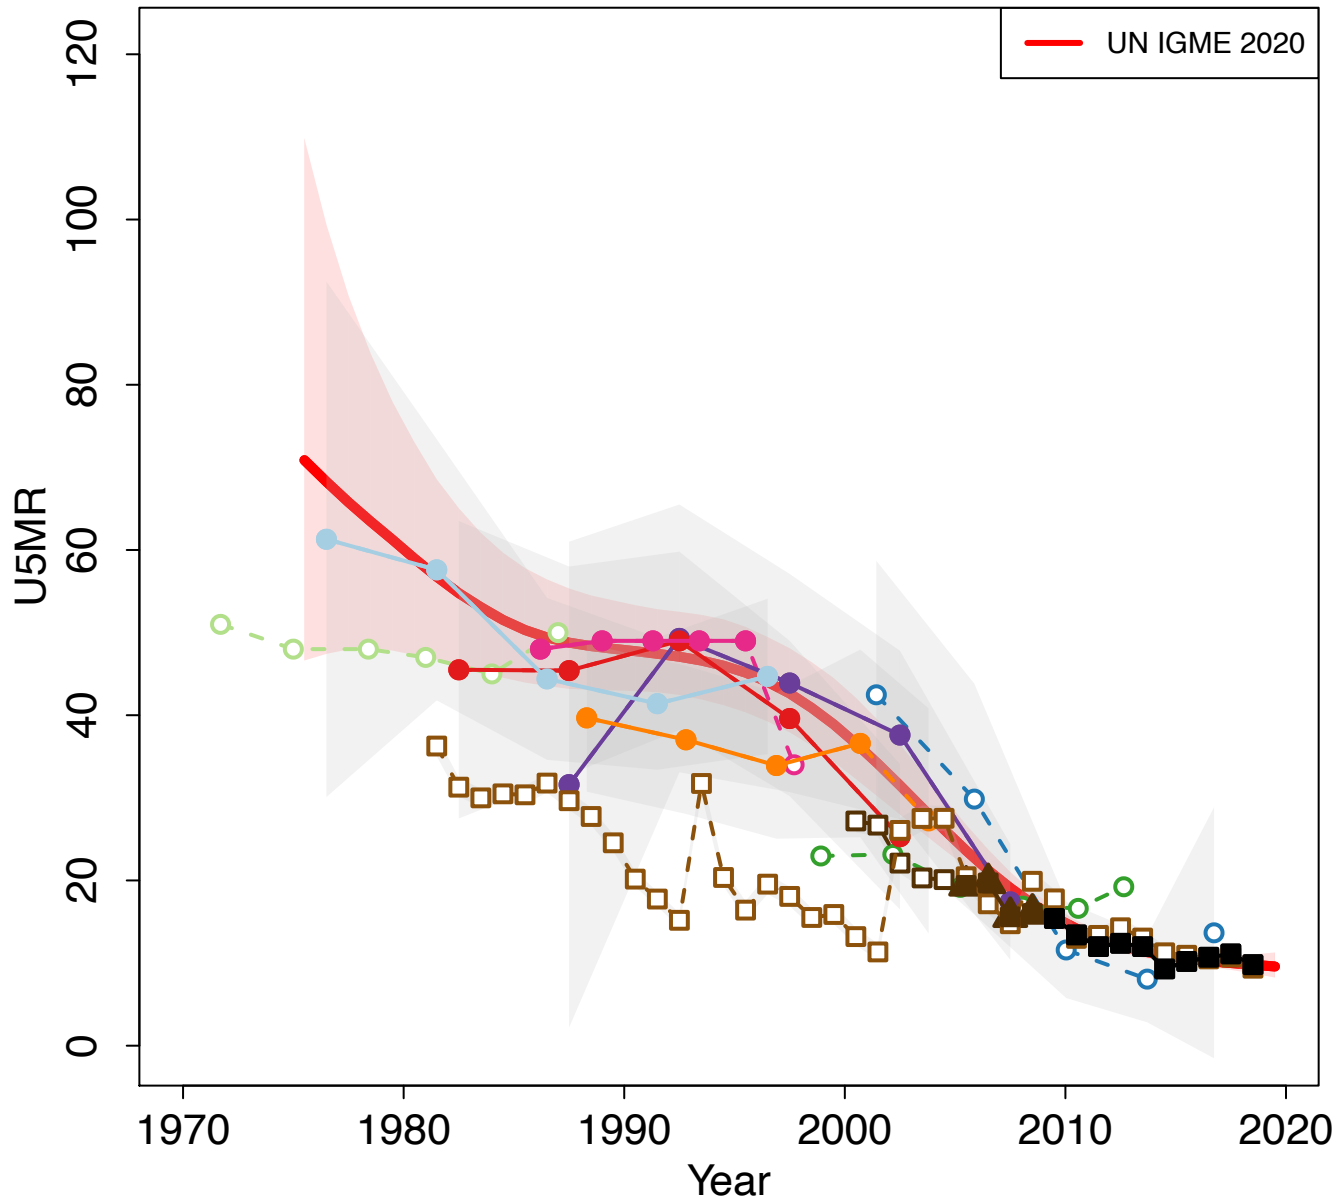

# Zoomed in

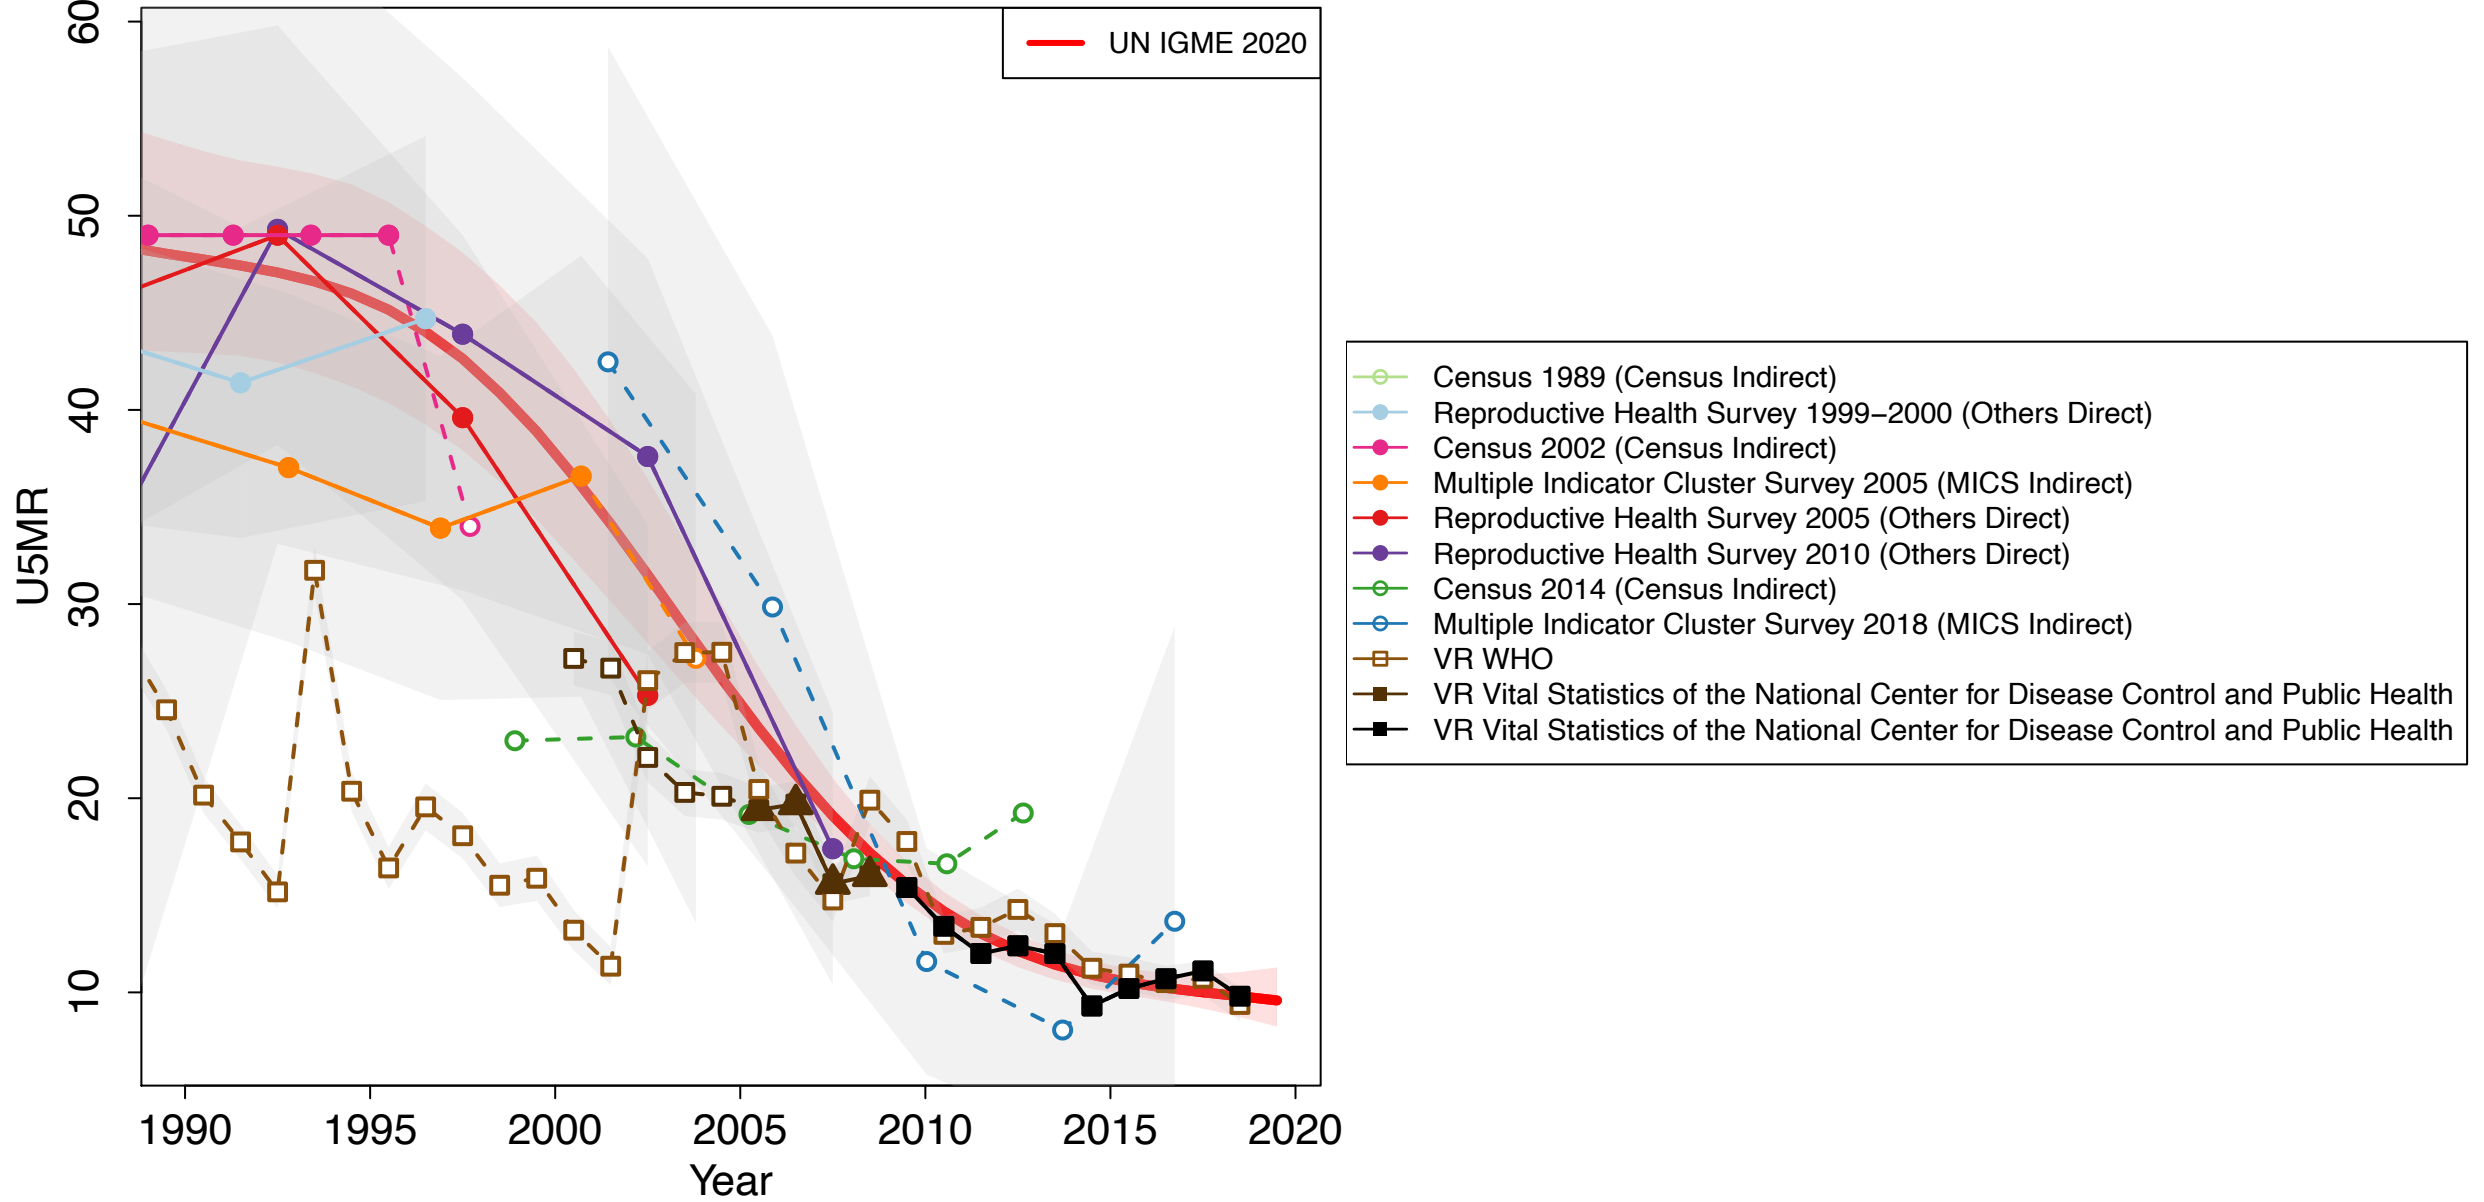

### Germany

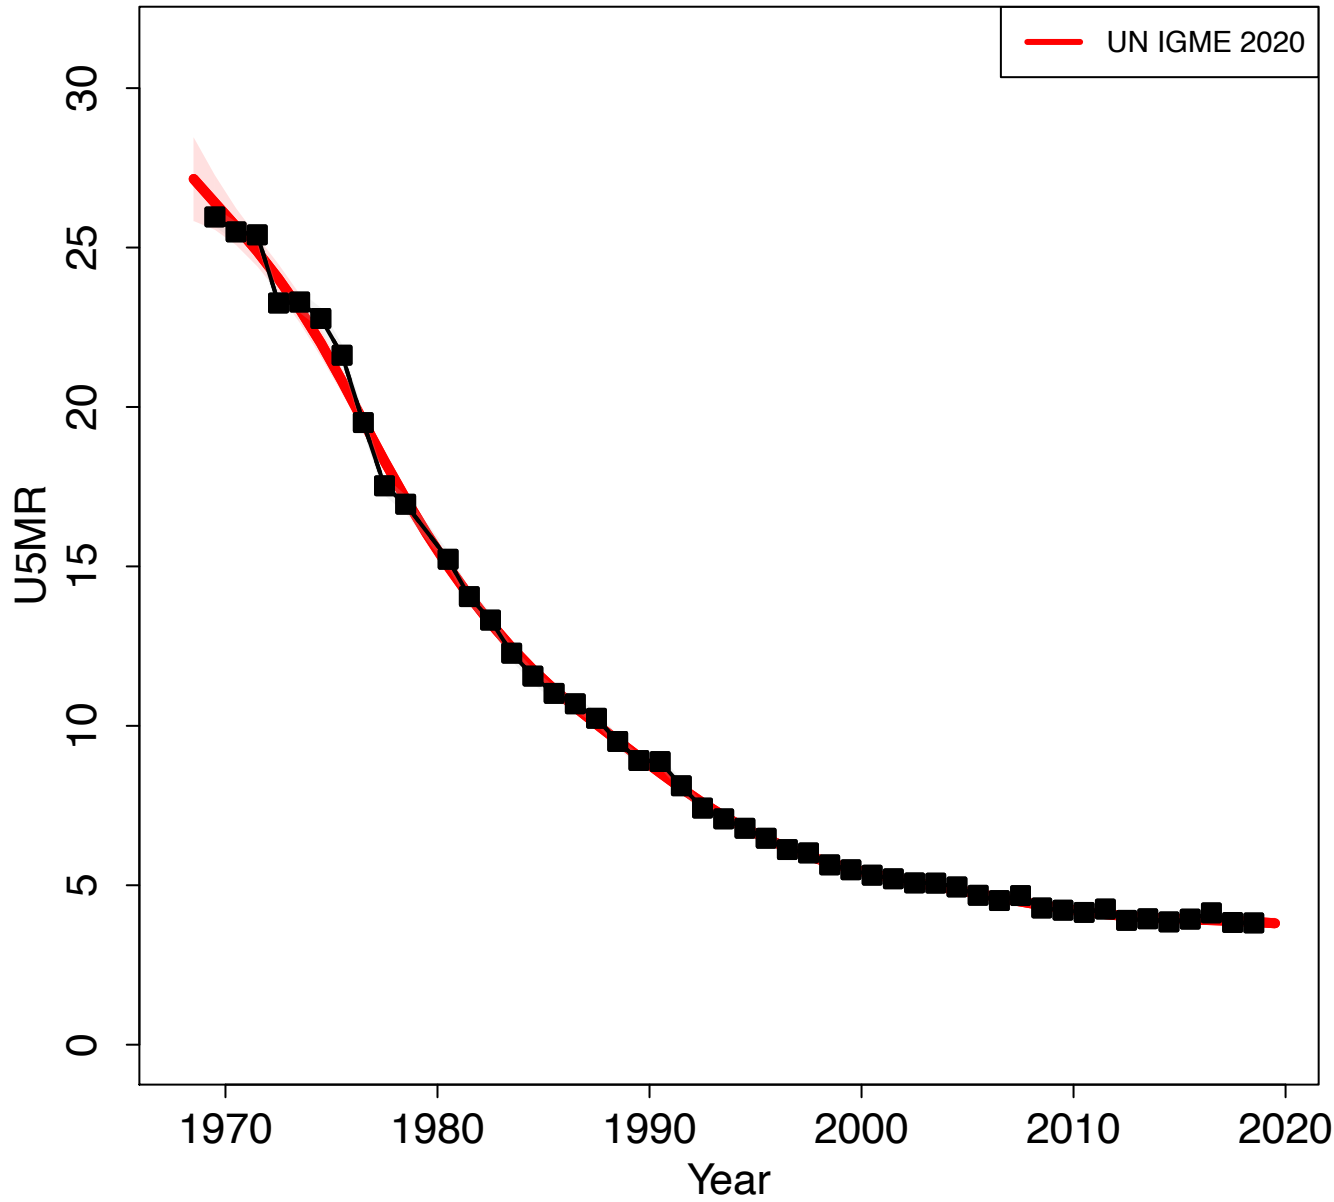

### Zoomed in

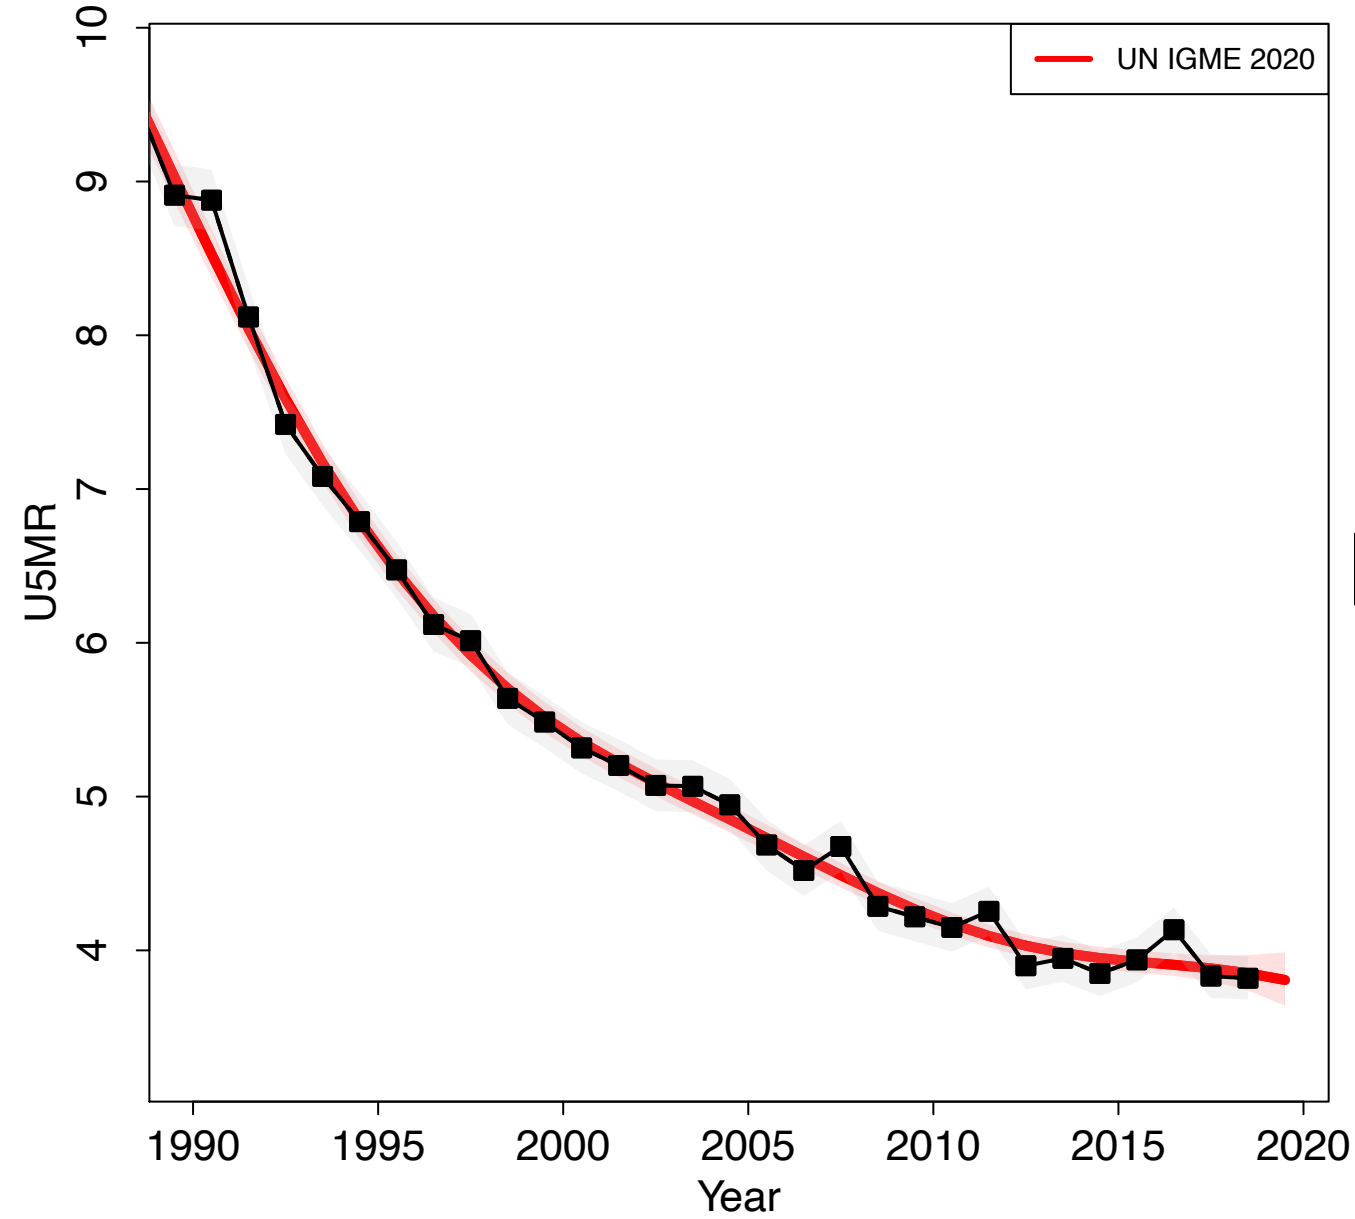

# Ghana

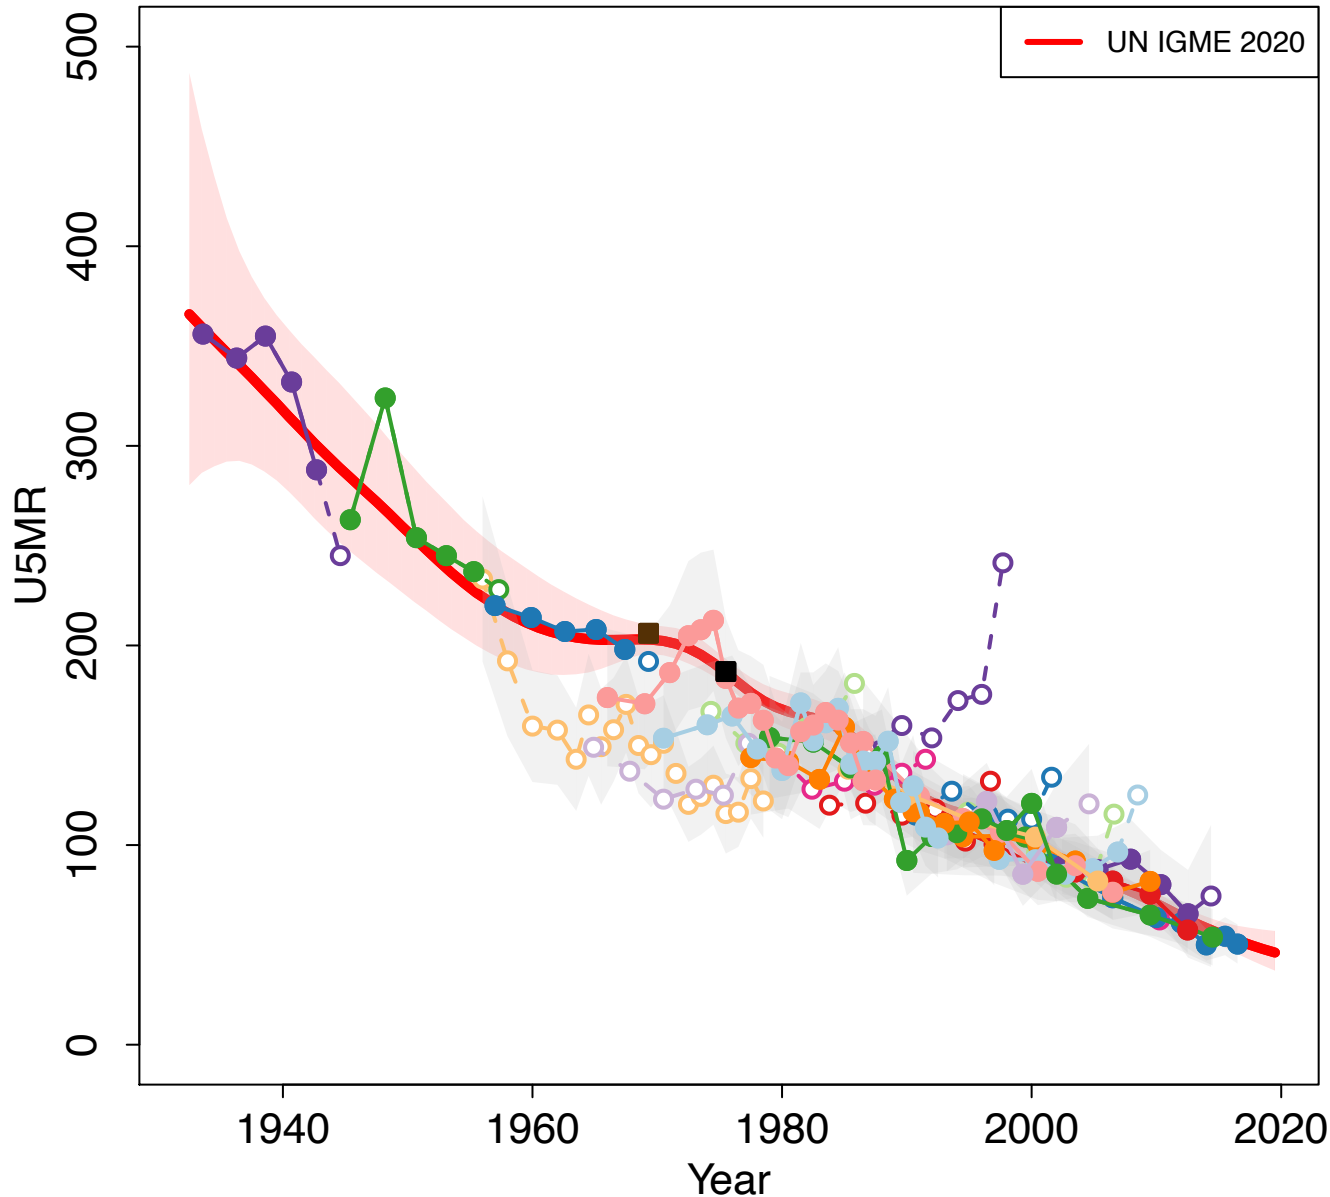

# Zoomed in

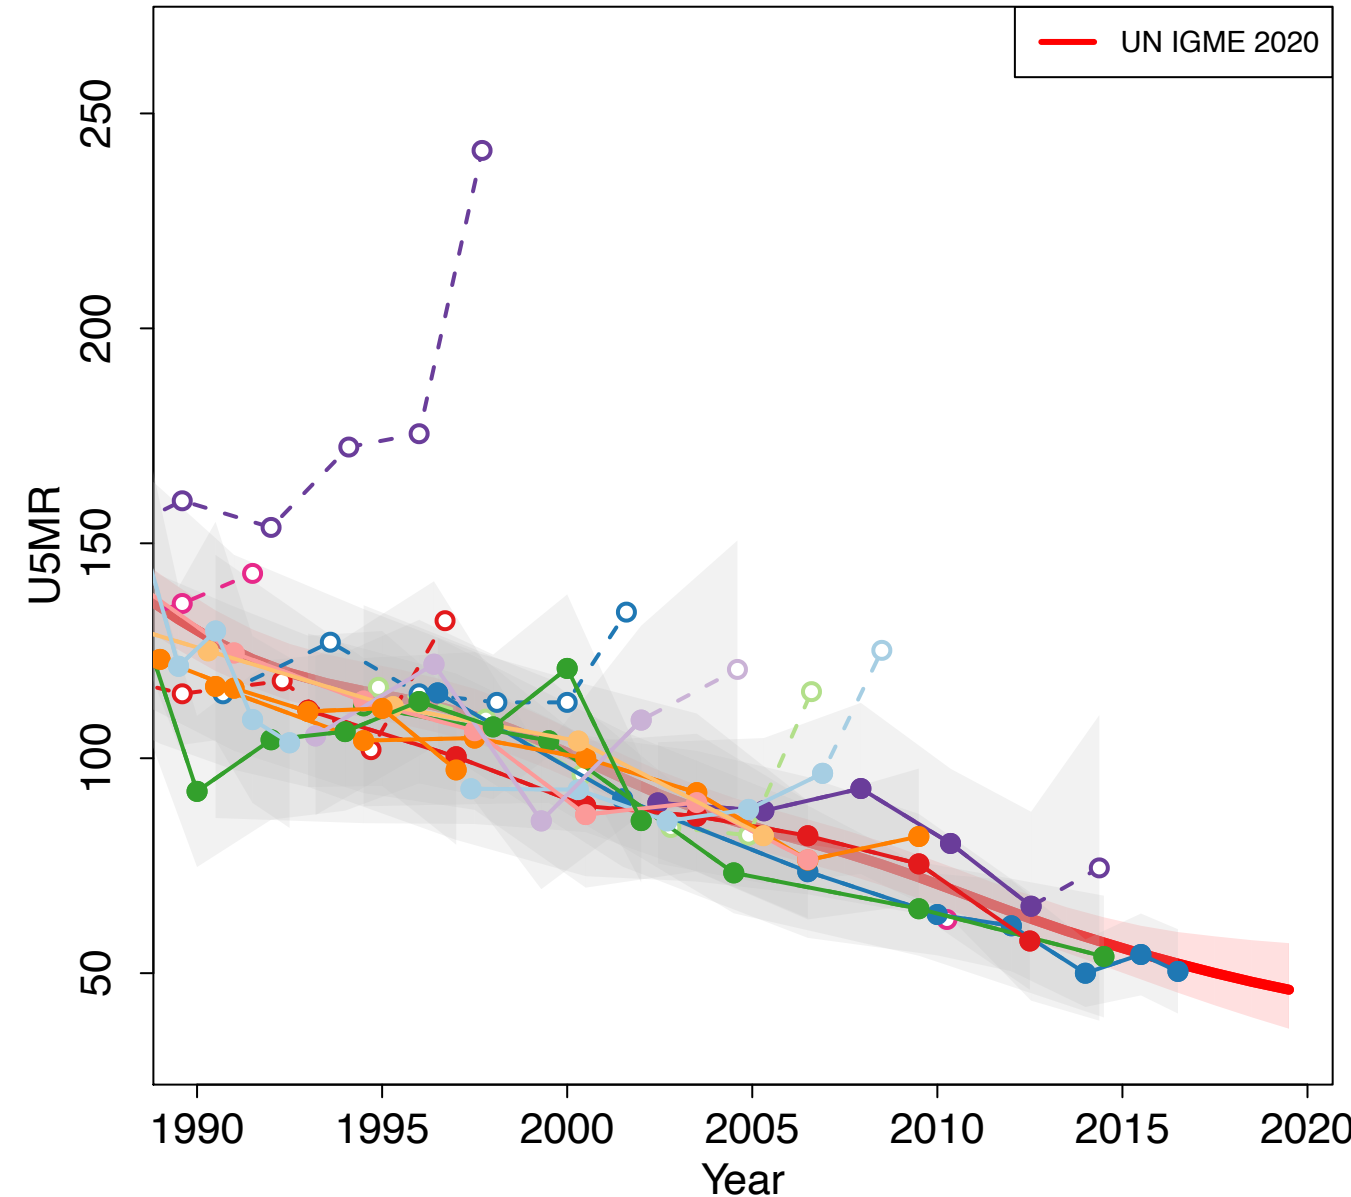

- Census 1948 (Census Indirect)
- Census 1960 (Census Indirect)
- Census 1971 (Census Indirect)
- Ghana Fertility Survey 1979–1980 (Other DHS Indirect)
- World Fertility Survey 1979–1980 (Other DHS Direct)
- Demographic and Health Survey 1988 (DHS Direct)
- Demographic and Health Survey 1988 (DHS Indirect)
- Demographic and Health Survey 1993–1994 (DHS Direct)
- Demographic and Health Survey 1993–1994 (DHS Indirect)
- Demographic and Health Survey 1998–1999 (DHS Direct)
- Demographic and Health Survey 1998–1999 (DHS Indirect)
- Census 2000 (Census Indirect)
- Demographic and Health Survey 2003 (DHS Direct)
- Demographic and Health Survey 2003 (DHS Indirect)
- Multiple Indicator Cluster Survey 2006 (MICS Indirect)
- Maternal Health Survey 2007 (Other DHS Direct)
- Demographic and Health Survey 2008 (DHS Direct)
- Demographic and Health Survey 2008 (DHS Indirect)
- Census 2010 (Census Indirect)
- Census 2010 (Others Household Deaths)
- Multiple Indicator Cluster Survey 2011 (MICS Direct)
- Demographic and Health Survey 2014 (DHS Direct)
- Malaria Indicator Survey 2016 (Other DHS Indirect)
- Multiple Indicator Cluster Survey 2017–2018 (MICS Direct)
- Maternal Health Survey 2017 (Other DHS Direct)
- VR Dual Registration
- VR CCP Registration

### Greece

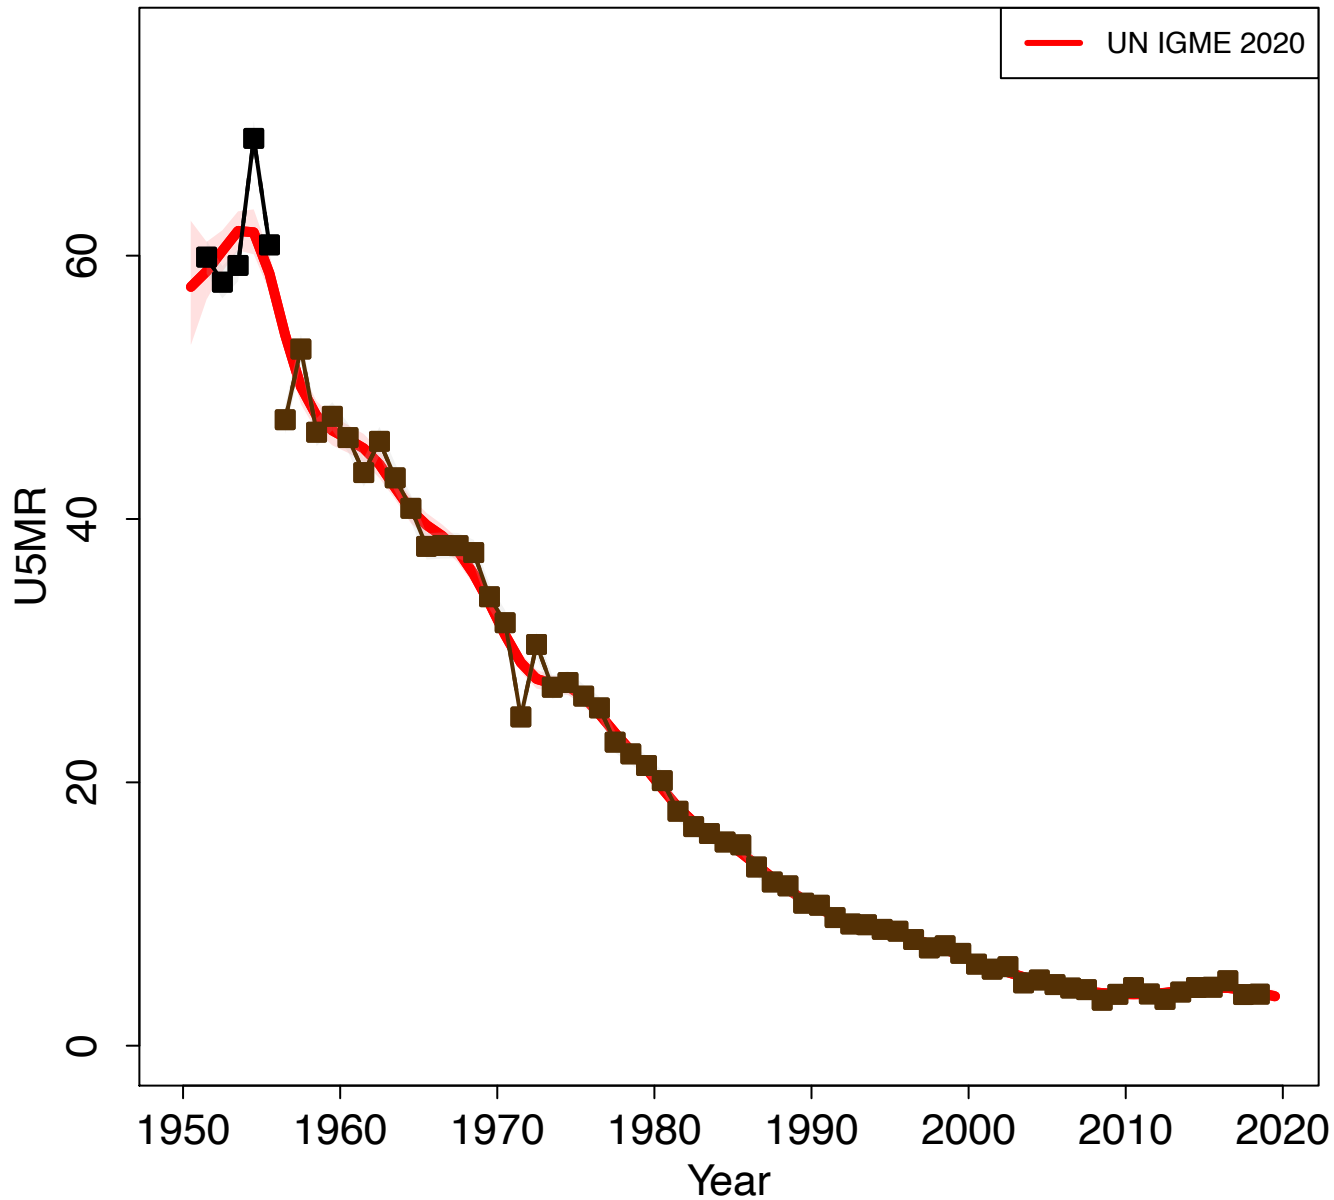

### Zoomed in

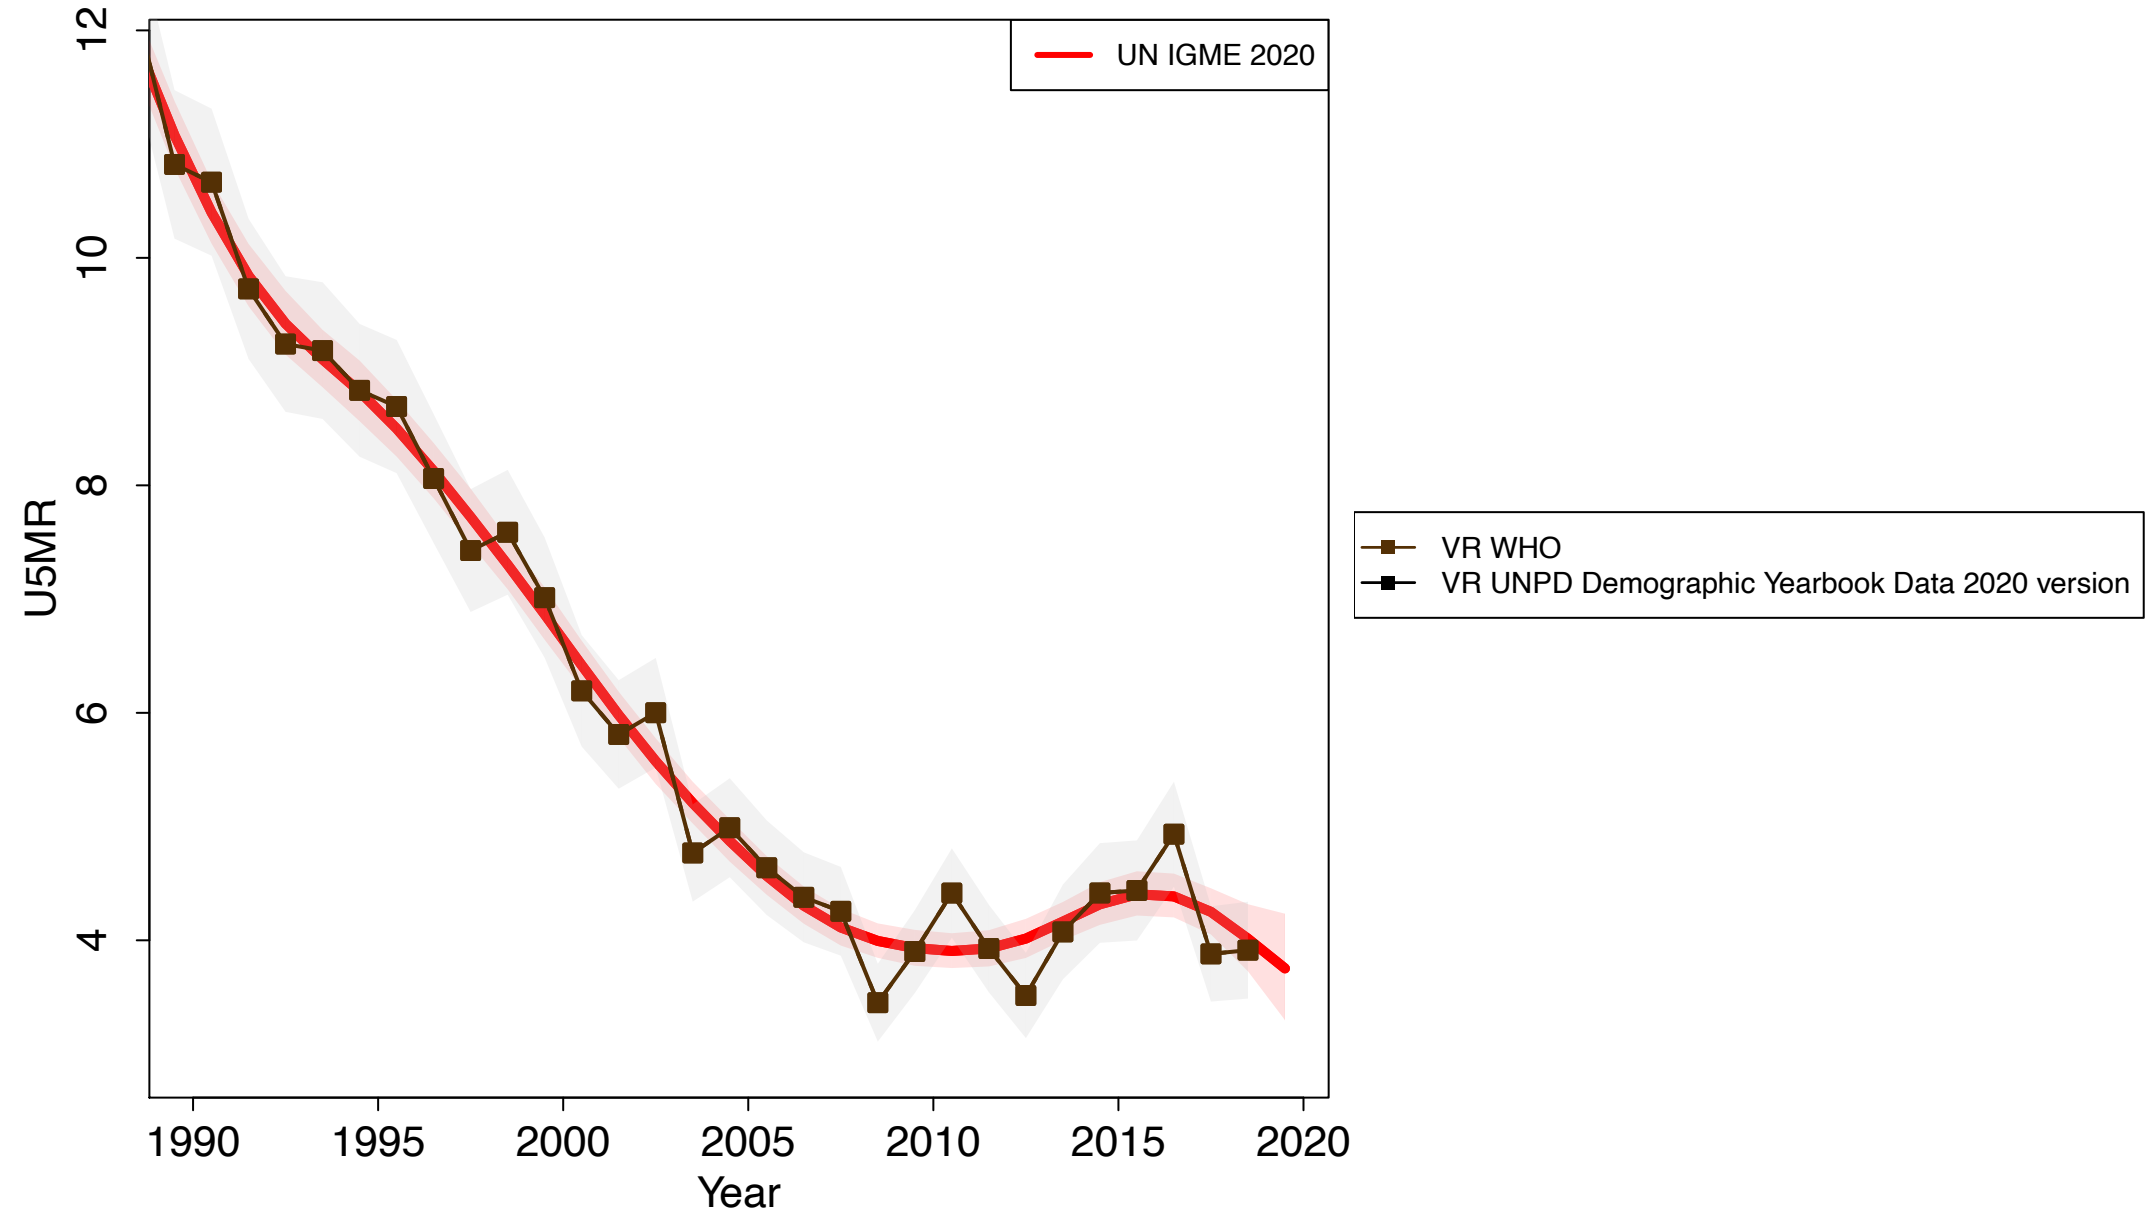

### Grenada

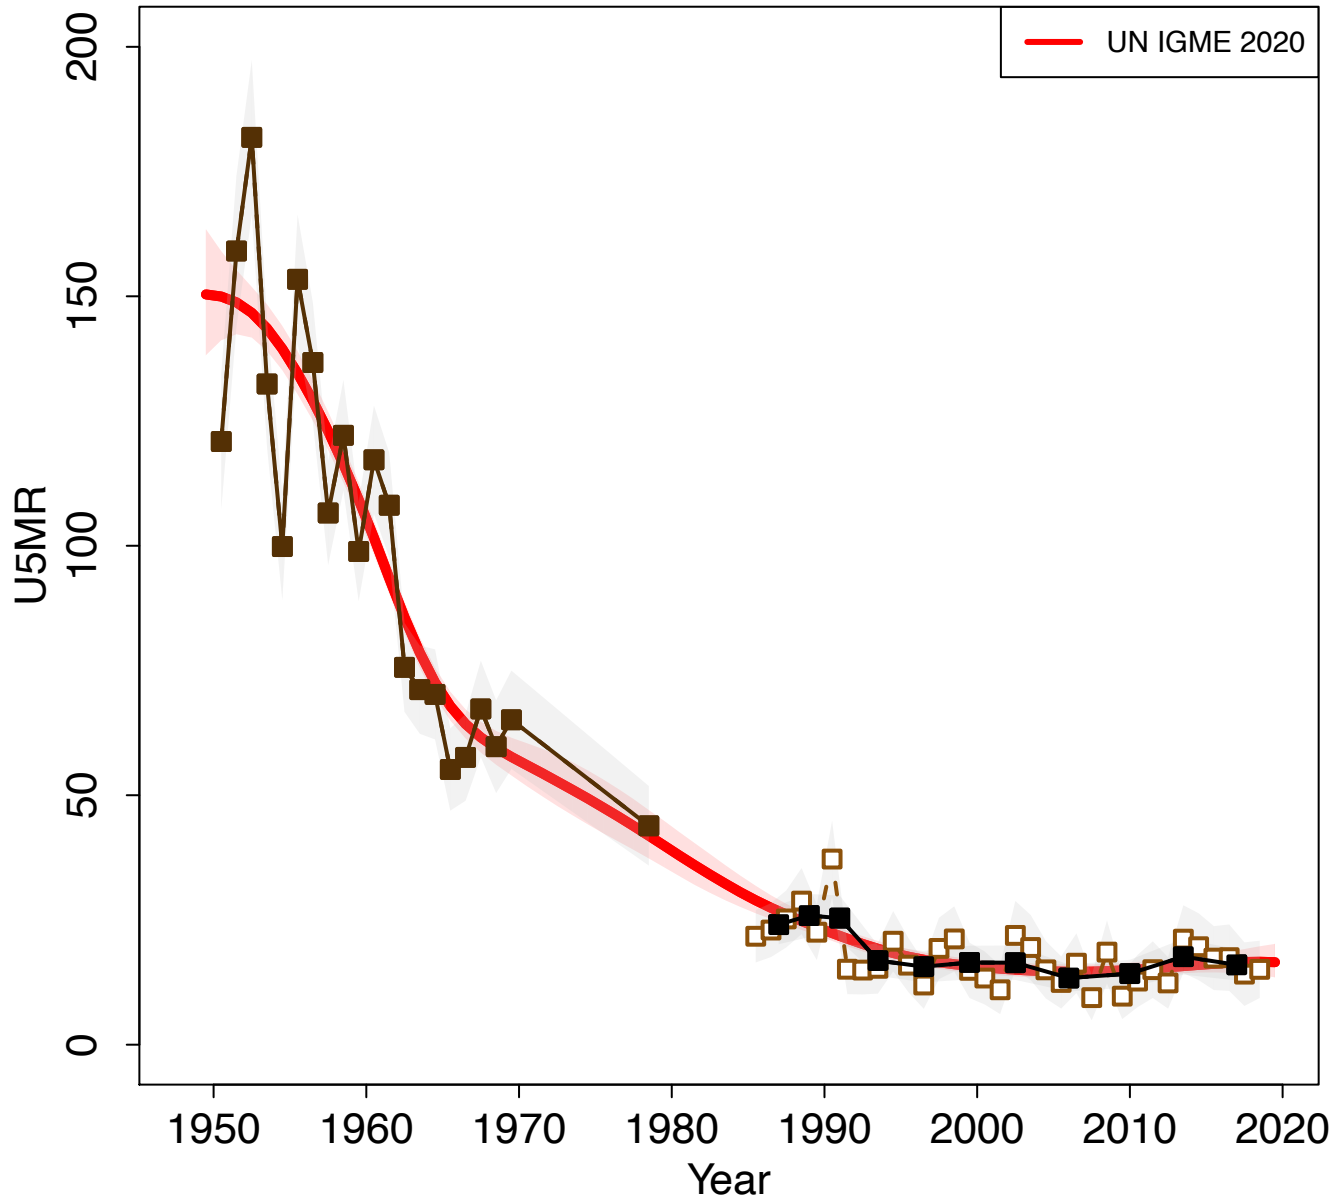

### Zoomed in

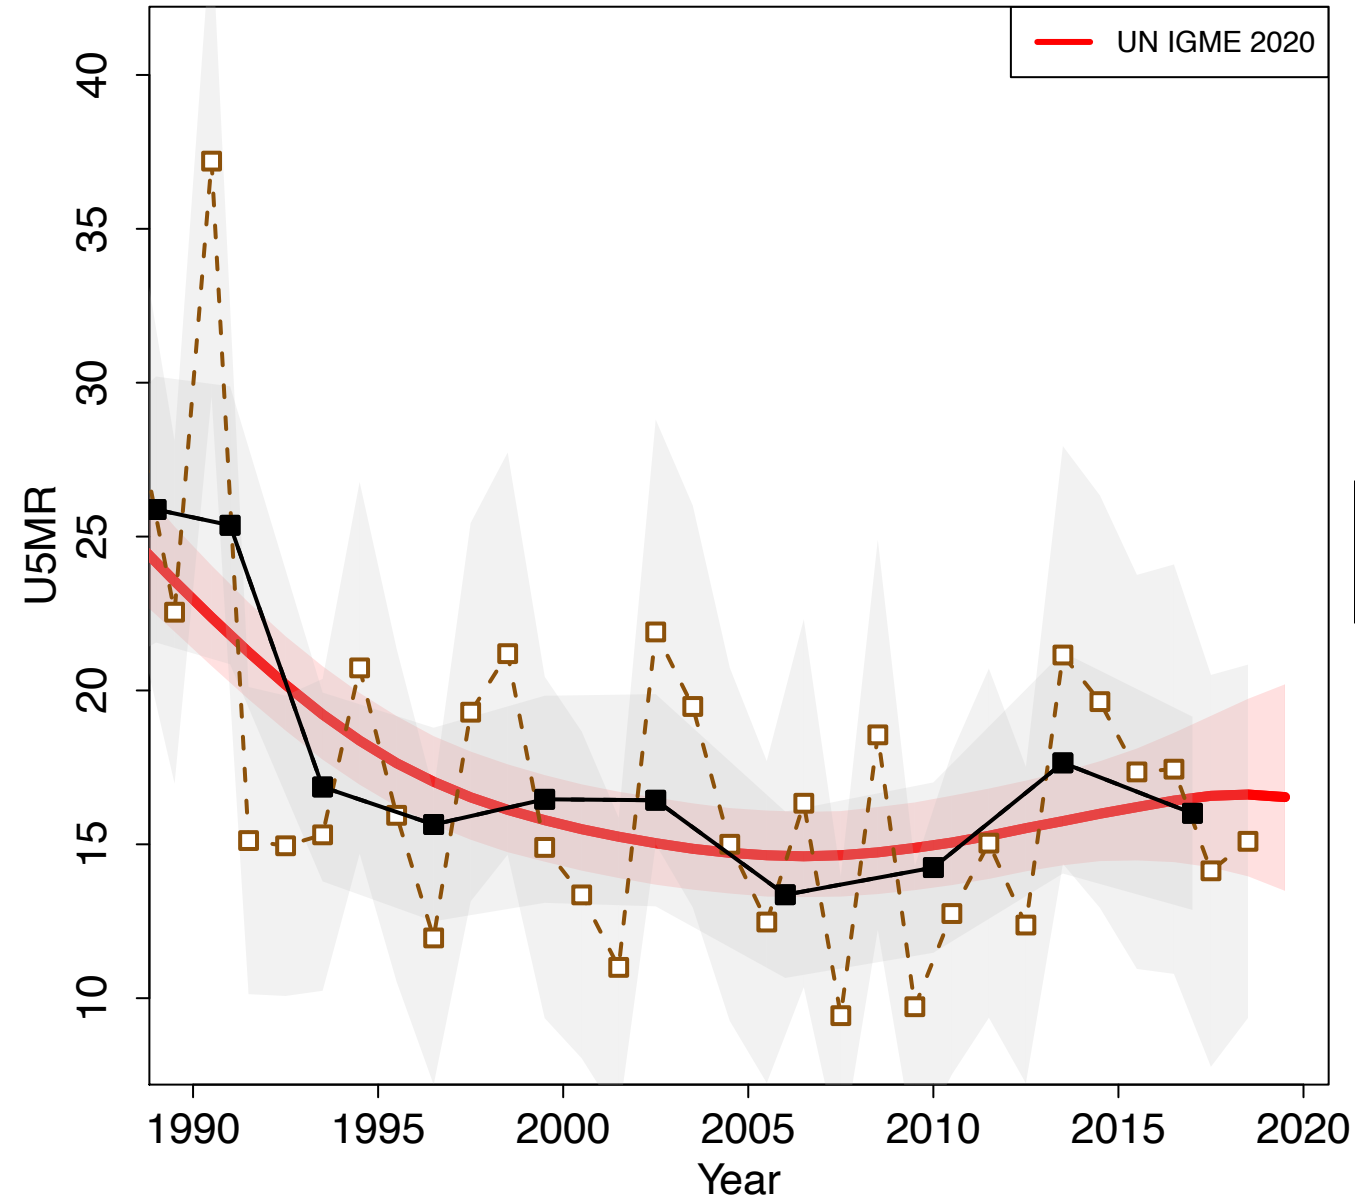

### Guatemala

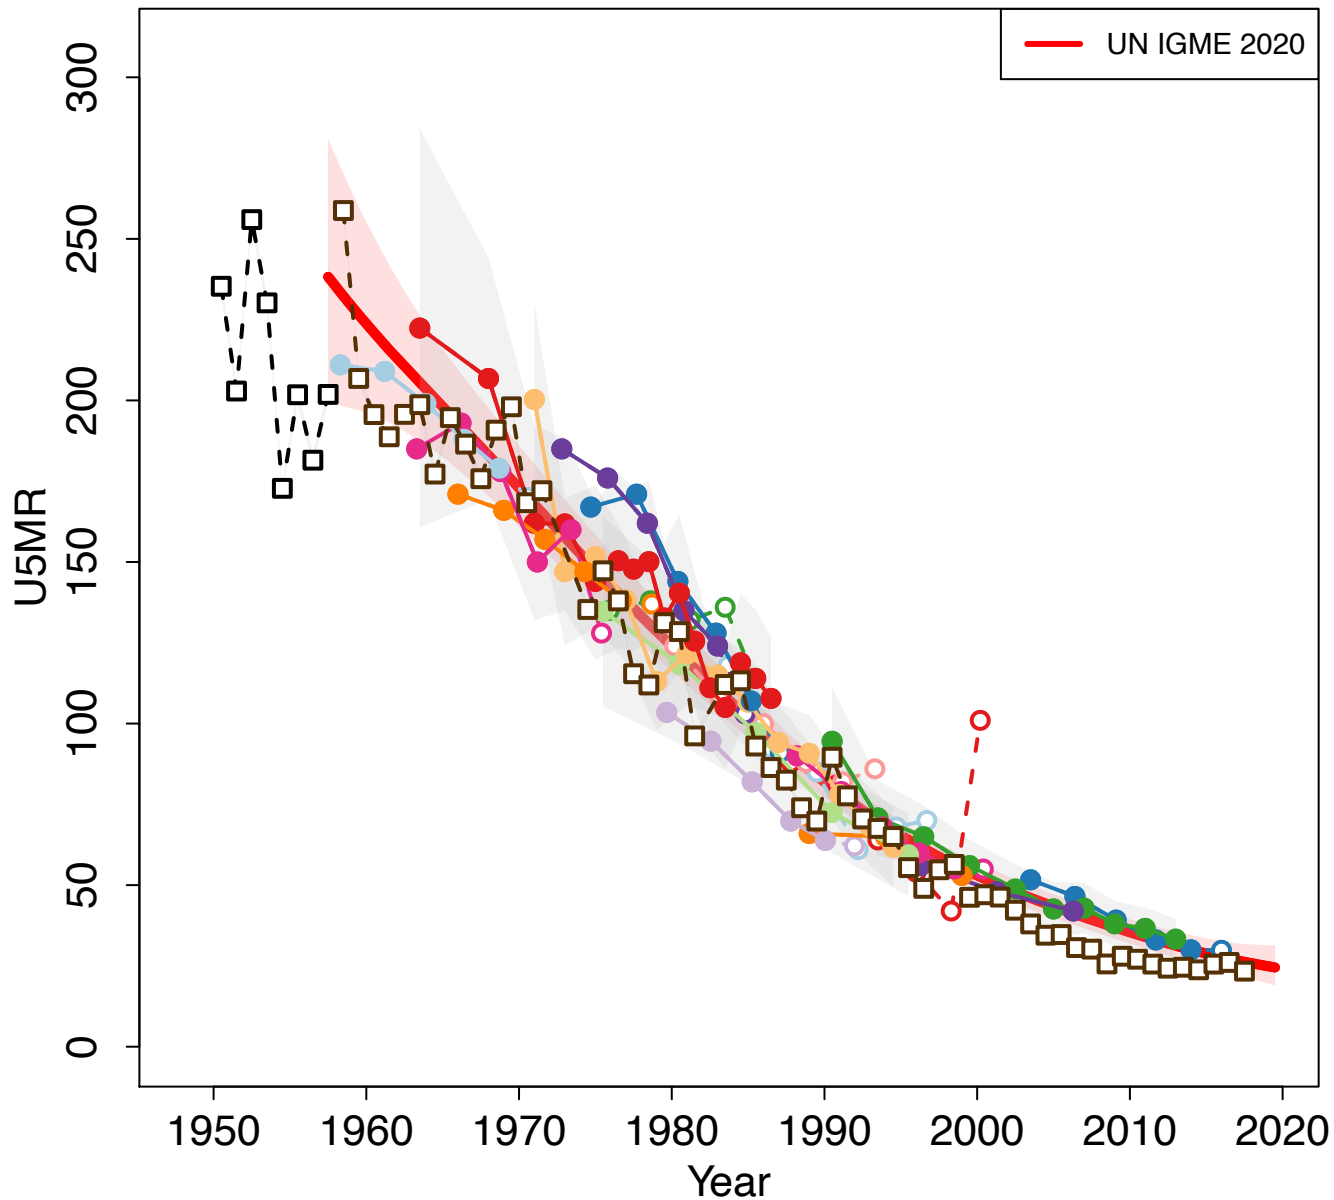

### Zoomed in

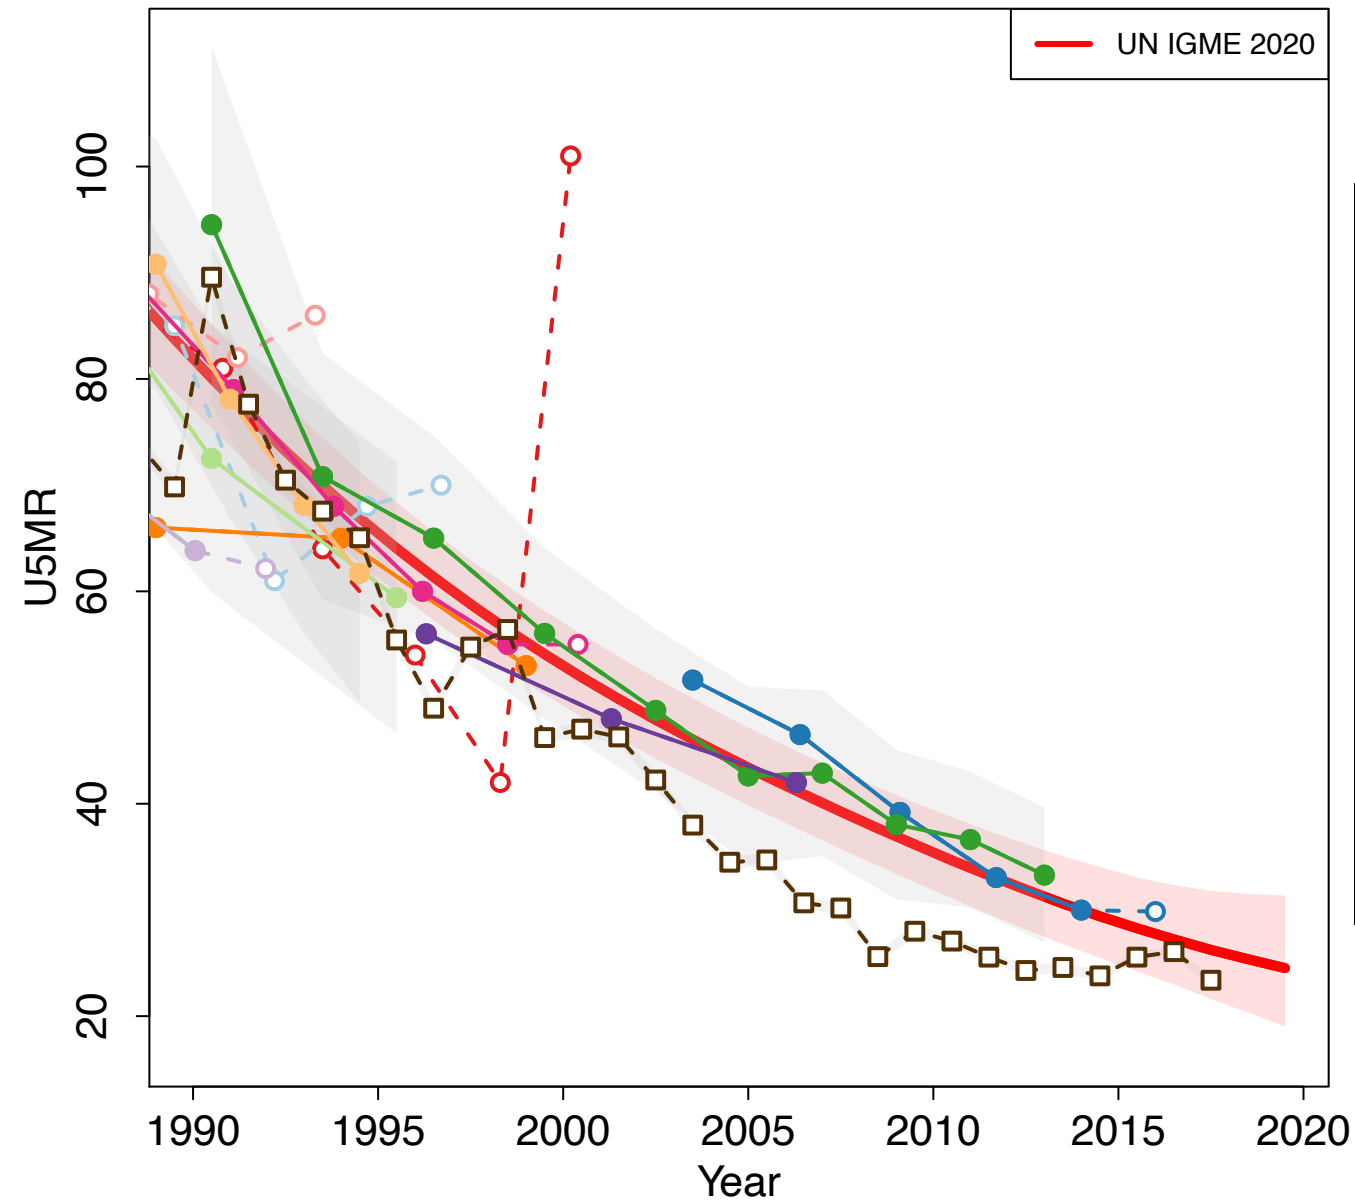

- Census 1973 (Census Indirect)
- Encuesta Nacional de Fecundidad, Planificacion Familiar y Comunicacion 1978-1979 (Others Indirect)
- Census 1981 (Census Indirect)
- Demographic and Health Survey 1987 (DHS Direct)
- Enc. Nacional SocioDemografica 1987 (Others Indirect)
- Demographic and Health Survey 1987 (DHS Indirect)
- Enc. Nacional Sociodemografica 1989 (Others Indirect)
- Census 1994 (Census Indirect)
- Demographic and Health Survey 1995 (DHS Direct)
- Demographic and Health Survey 1995 (DHS Indirect)
- Demographic and Health Survey 1998-1999 (Other DHS Direct)
- Demographic and Health Survey 1998-1999 (Other DHS Indirect)
- Census 2002 (Census Indirect)
- Encuesta Nacional de Salud Materno Infantil (ENSMI) 2002 (Others Direct)
- Encuesta Nacional de Salud Materno Infantil (ENSMI) 2002 (Other DHS Indirect)
- Encuesta Nacional de Salud Materno Infantil (ENSMI) 2008-2009 (Other DHS Direct)
- Demographic and Health Survey 2014-2015 (DHS Direct)
- Census 2018 (Census Indirect)
- VR WHO
- VR UNPD Demographic Yearbook Data 2020 version

# Guinea

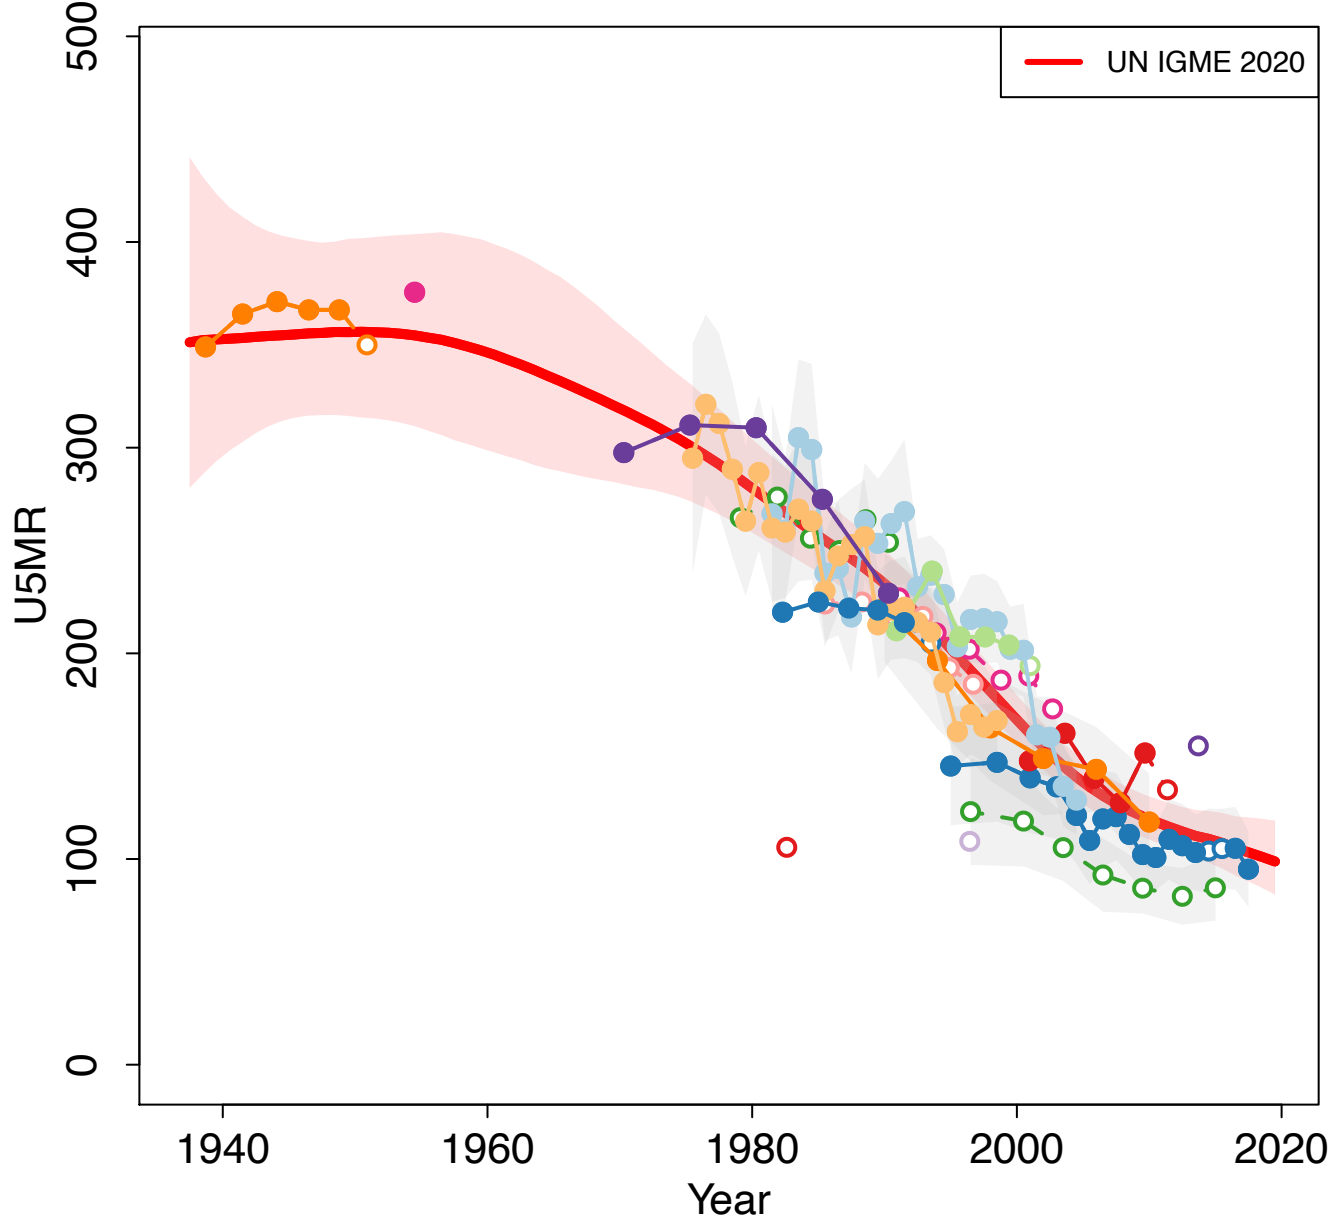

# Zoomed in

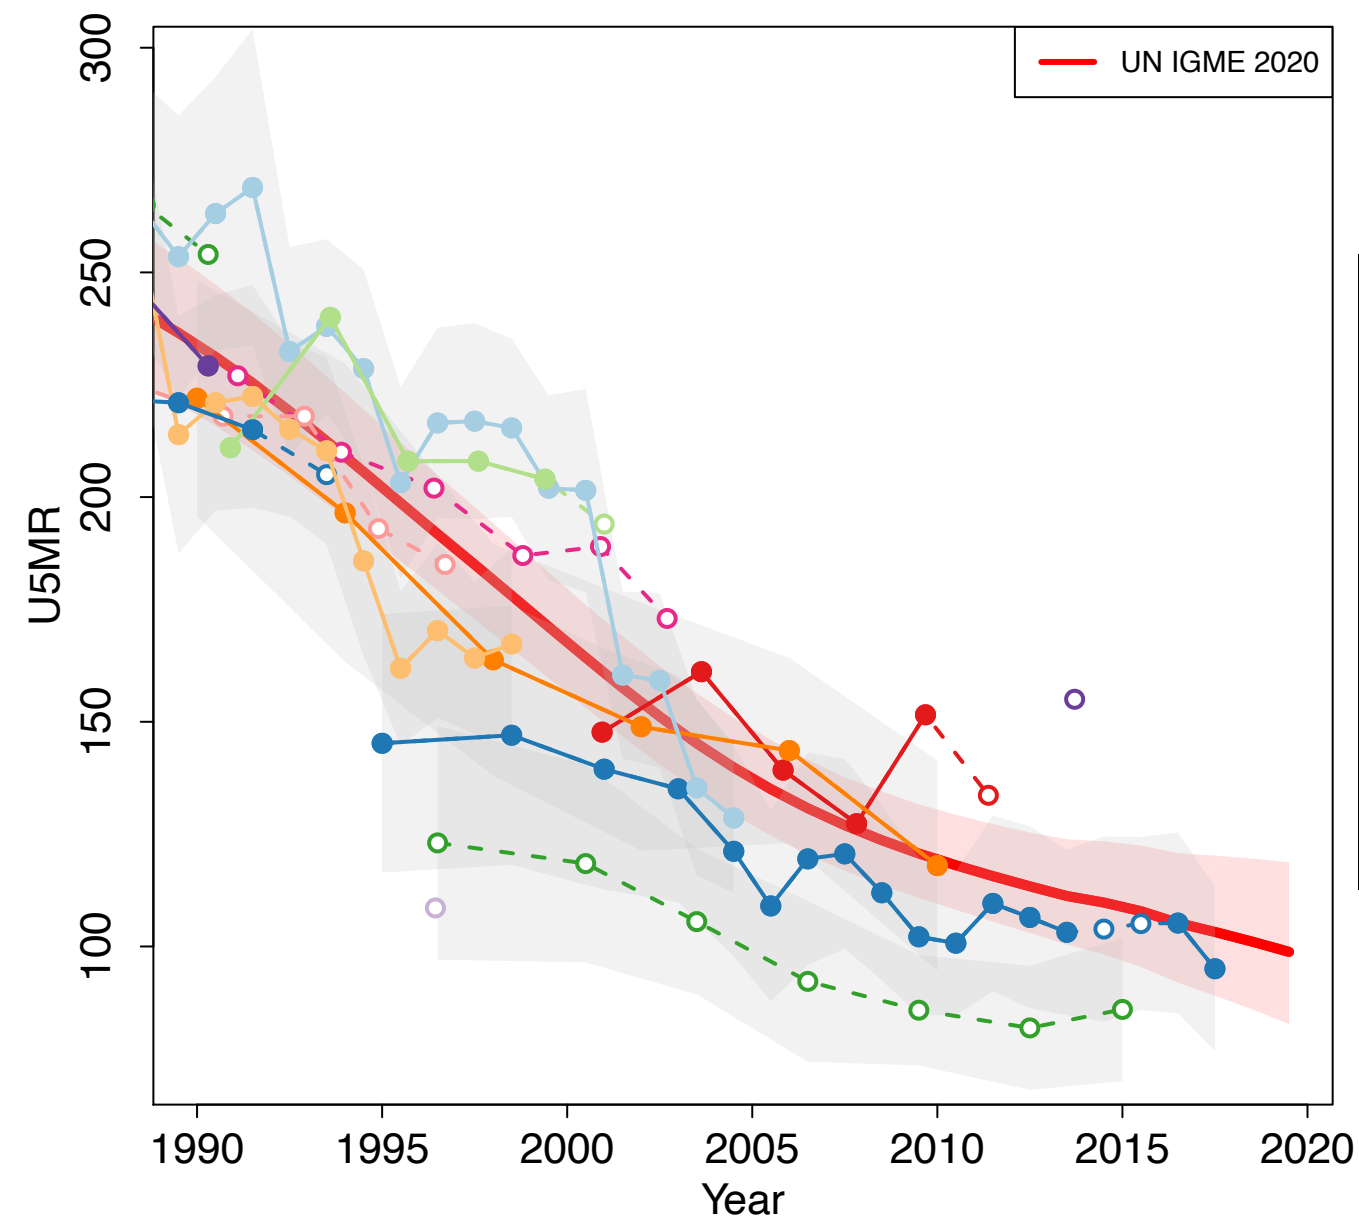



# Guinea-Bissau

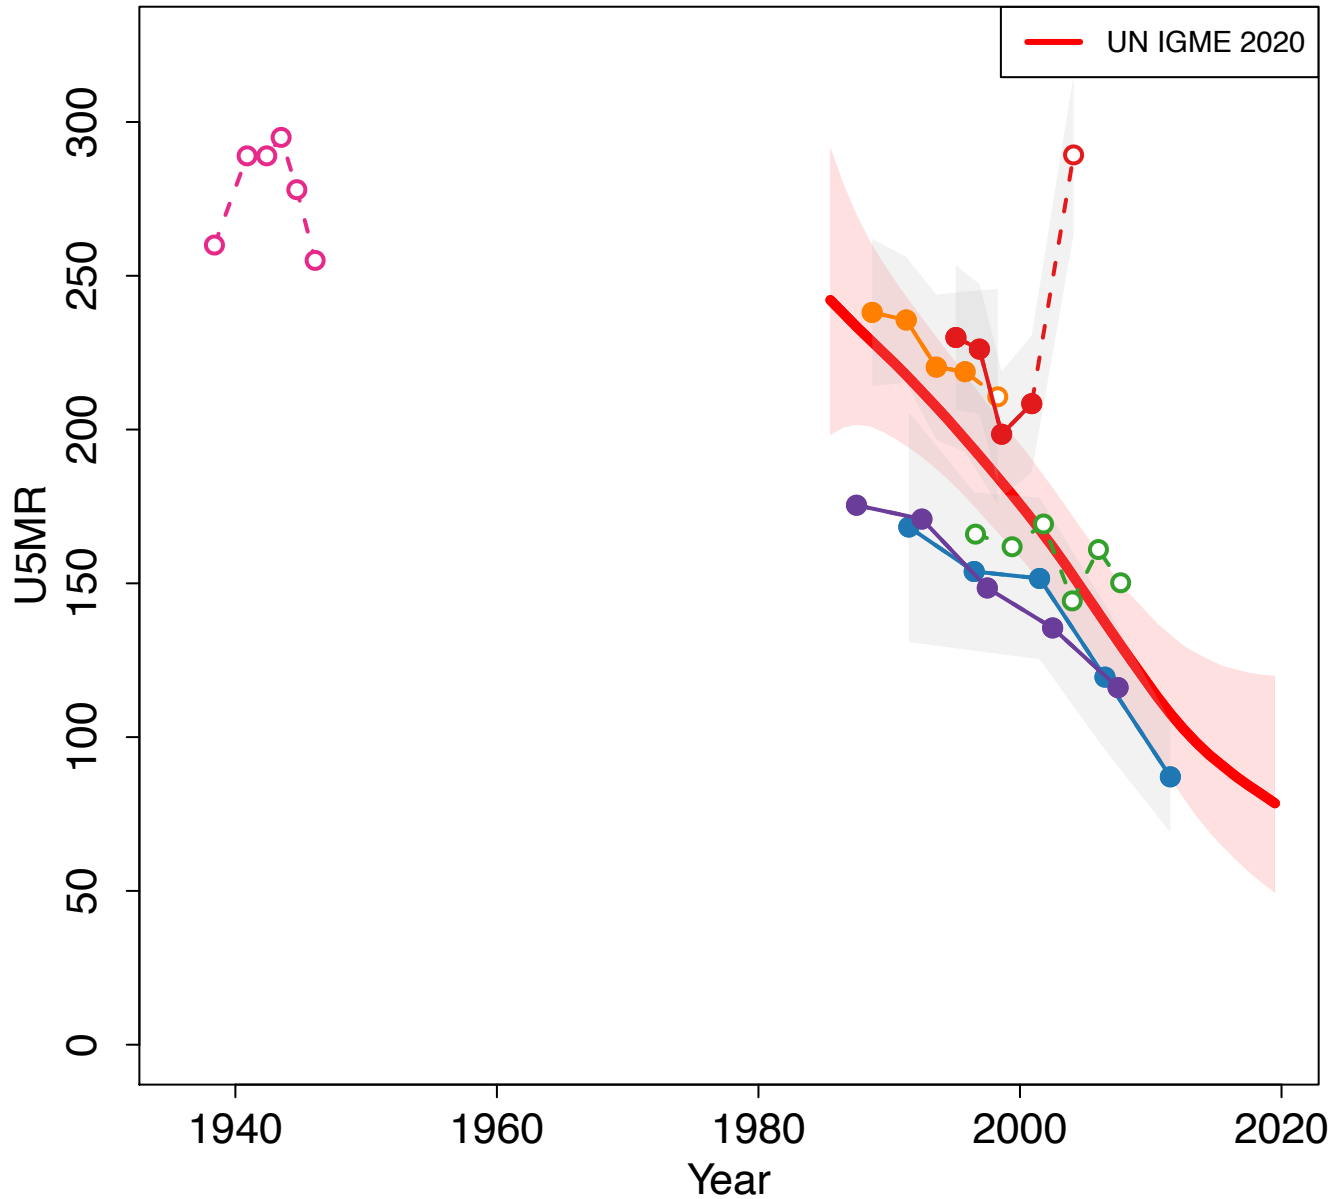

# Zoomed in

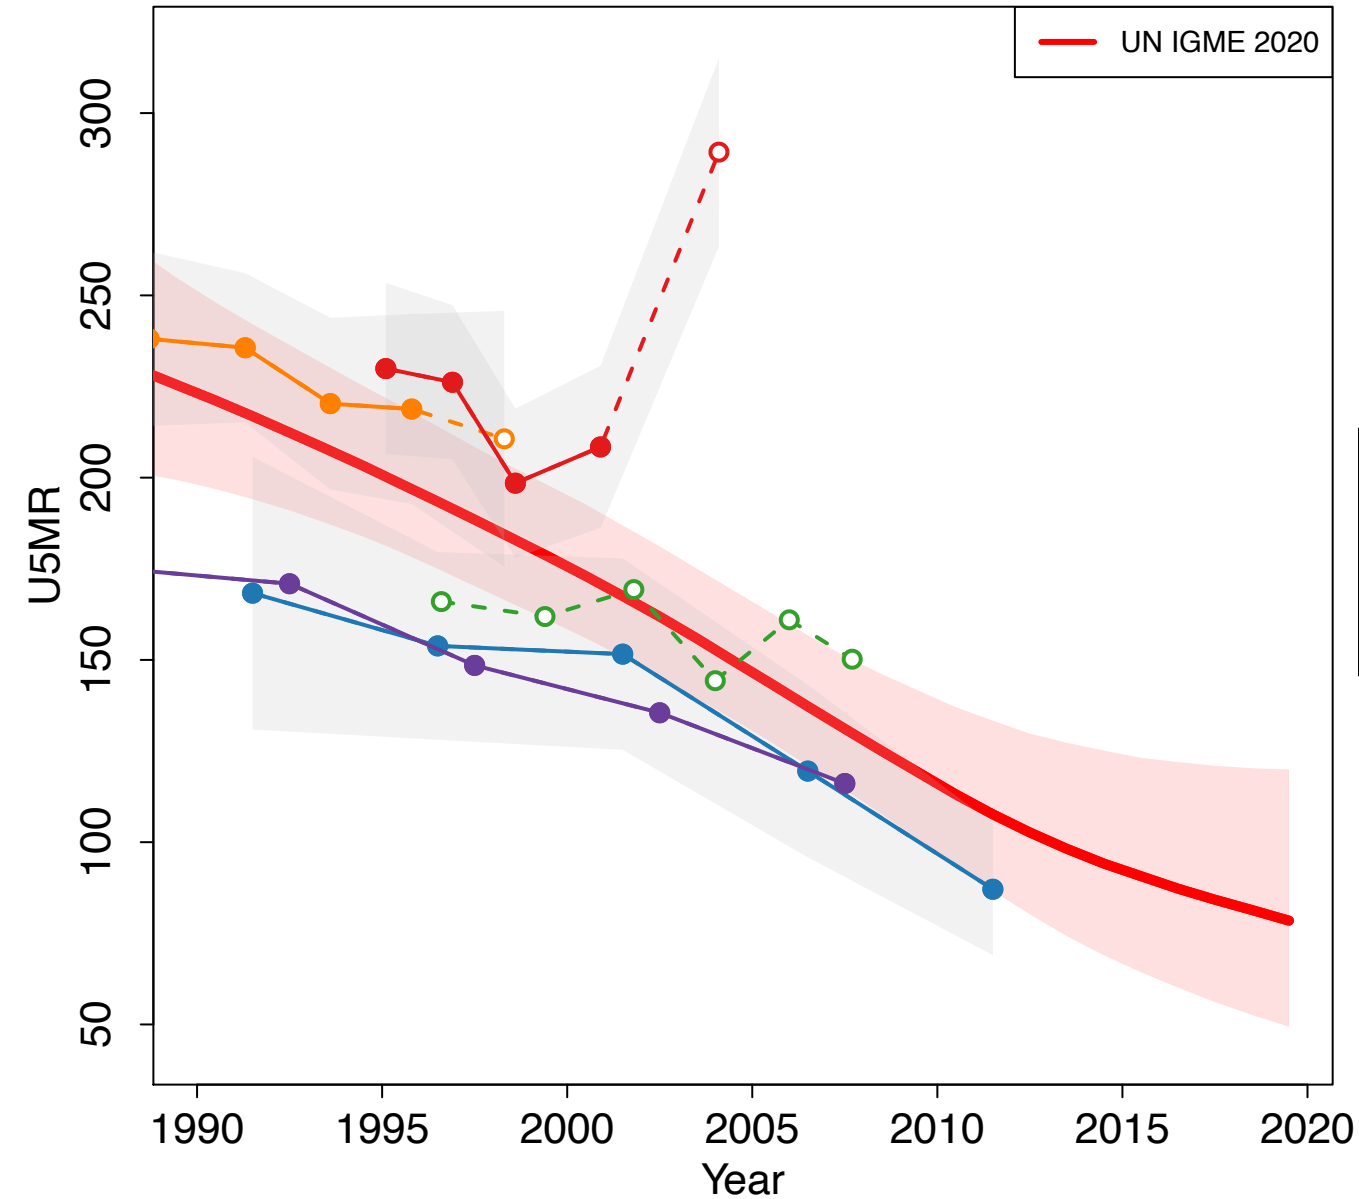

- Census 1950 (Census Indirect)
- Multiple Indicator Cluster Survey 2000 (MICS Indirect)
- Multiple Indicator Cluster Survey 2006 (MICS Indirect)
- Multiple Indicator Cluster Survey 2010 (MICS Direct)
- Multiple Indicator Cluster Survey 2010 (Others Indirect)
- Multiple Indicator Cluster Survey 2014 (MICS Direct)

# Guyana

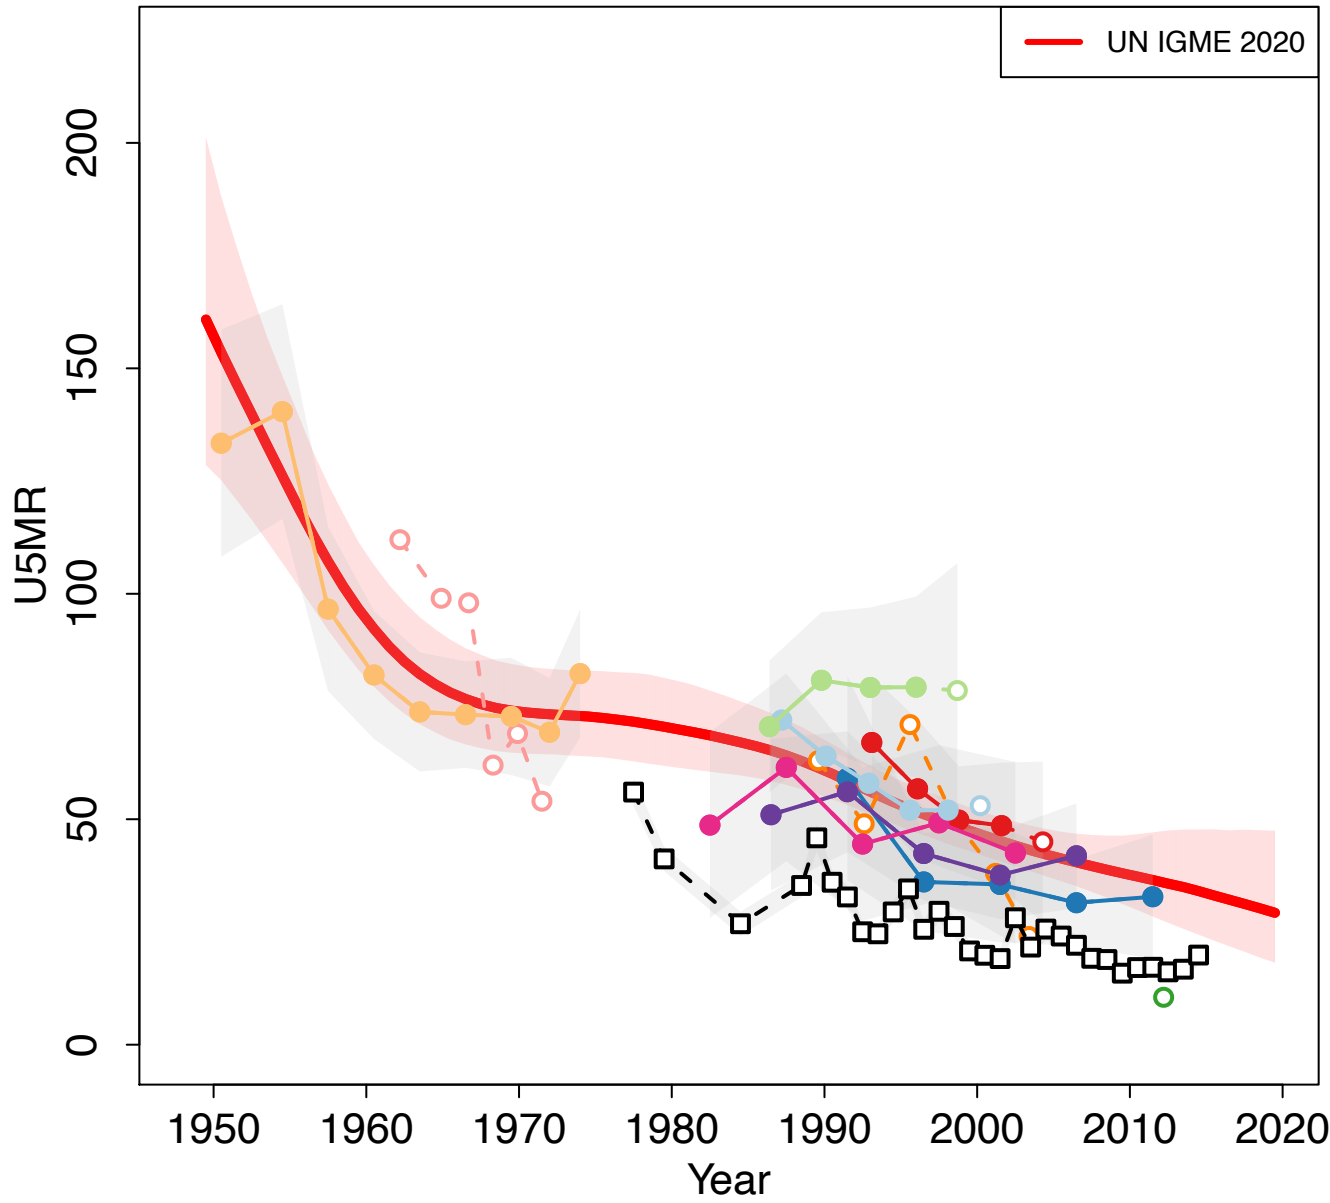

# Zoomed in

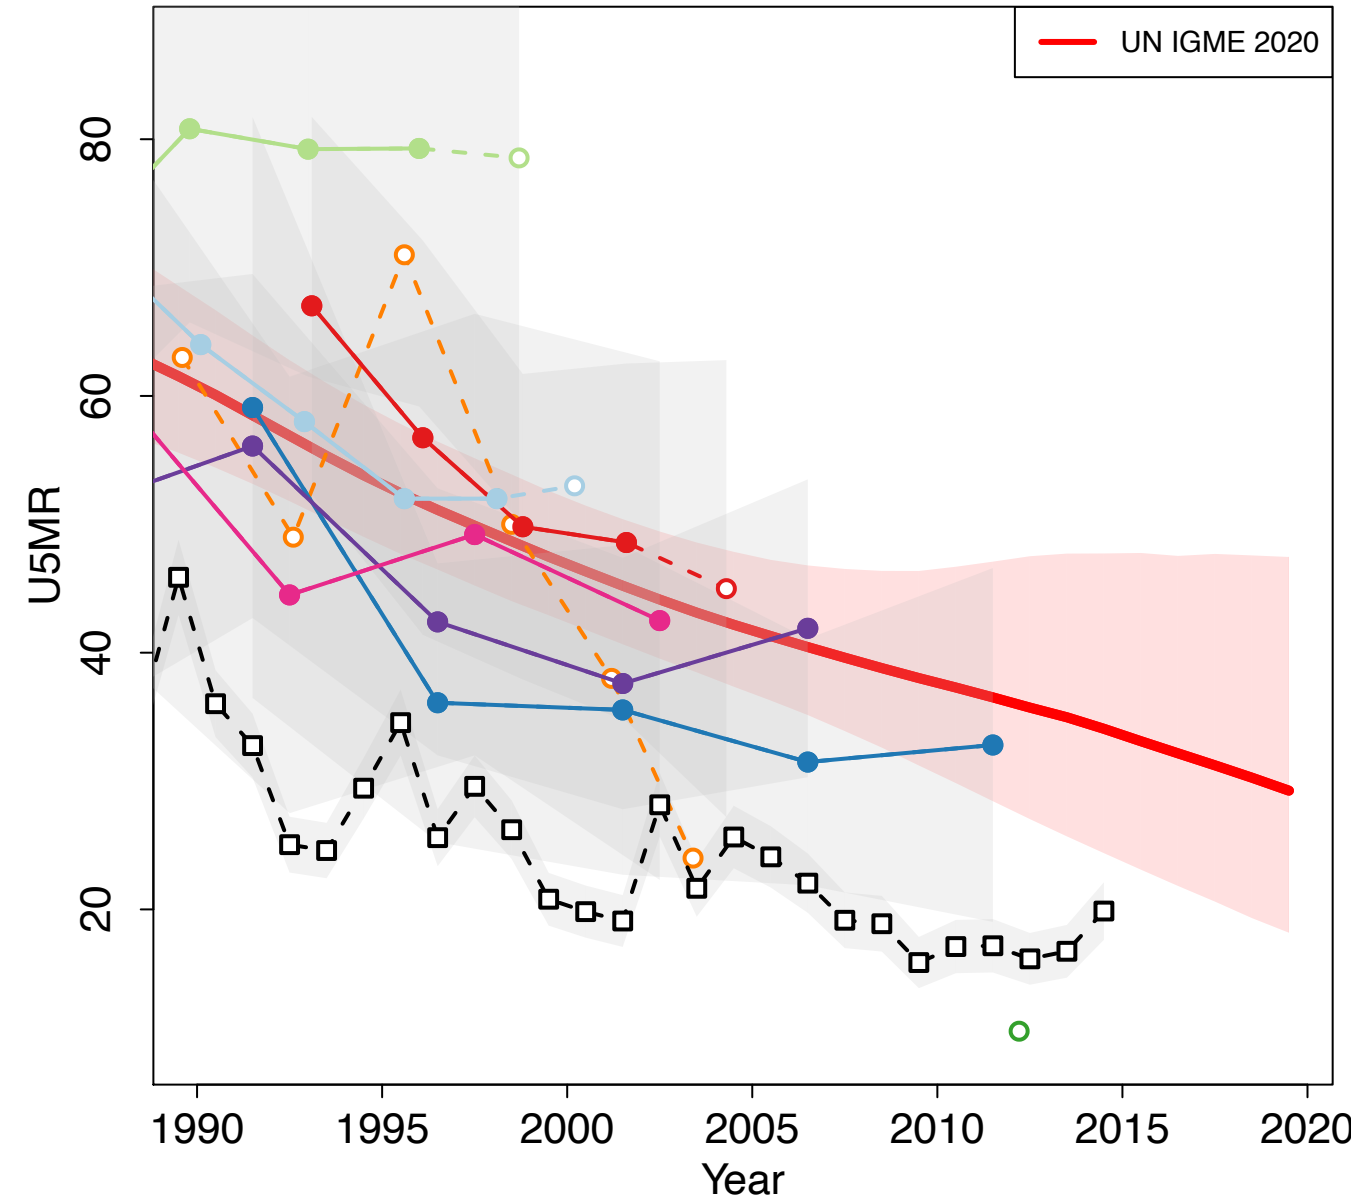

- World Fertility Survey 1975 (Other DHS Direct)
- World Fertility Survey 1975 (Other DHS Indirect)
- Multiple Indicator Cluster Survey 2000–2001 (MICS Indirect)
- Census 2002 (Census Indirect)
- AIDS Indicator Survey 2005 (Other DHS Direct)
- AIDS Indicator Survey 2005 (Other DHS Indirect)
- Multiple Indicator Cluster Survey 2006 (MICS Indirect)
- Demographic and Health Survey 2009 (DHS Direct)
- Census 2012 (Others Household Deaths)
- Multiple Indicator Cluster Survey 2014 (MICS Direct)
- VR WHO

### Haiti

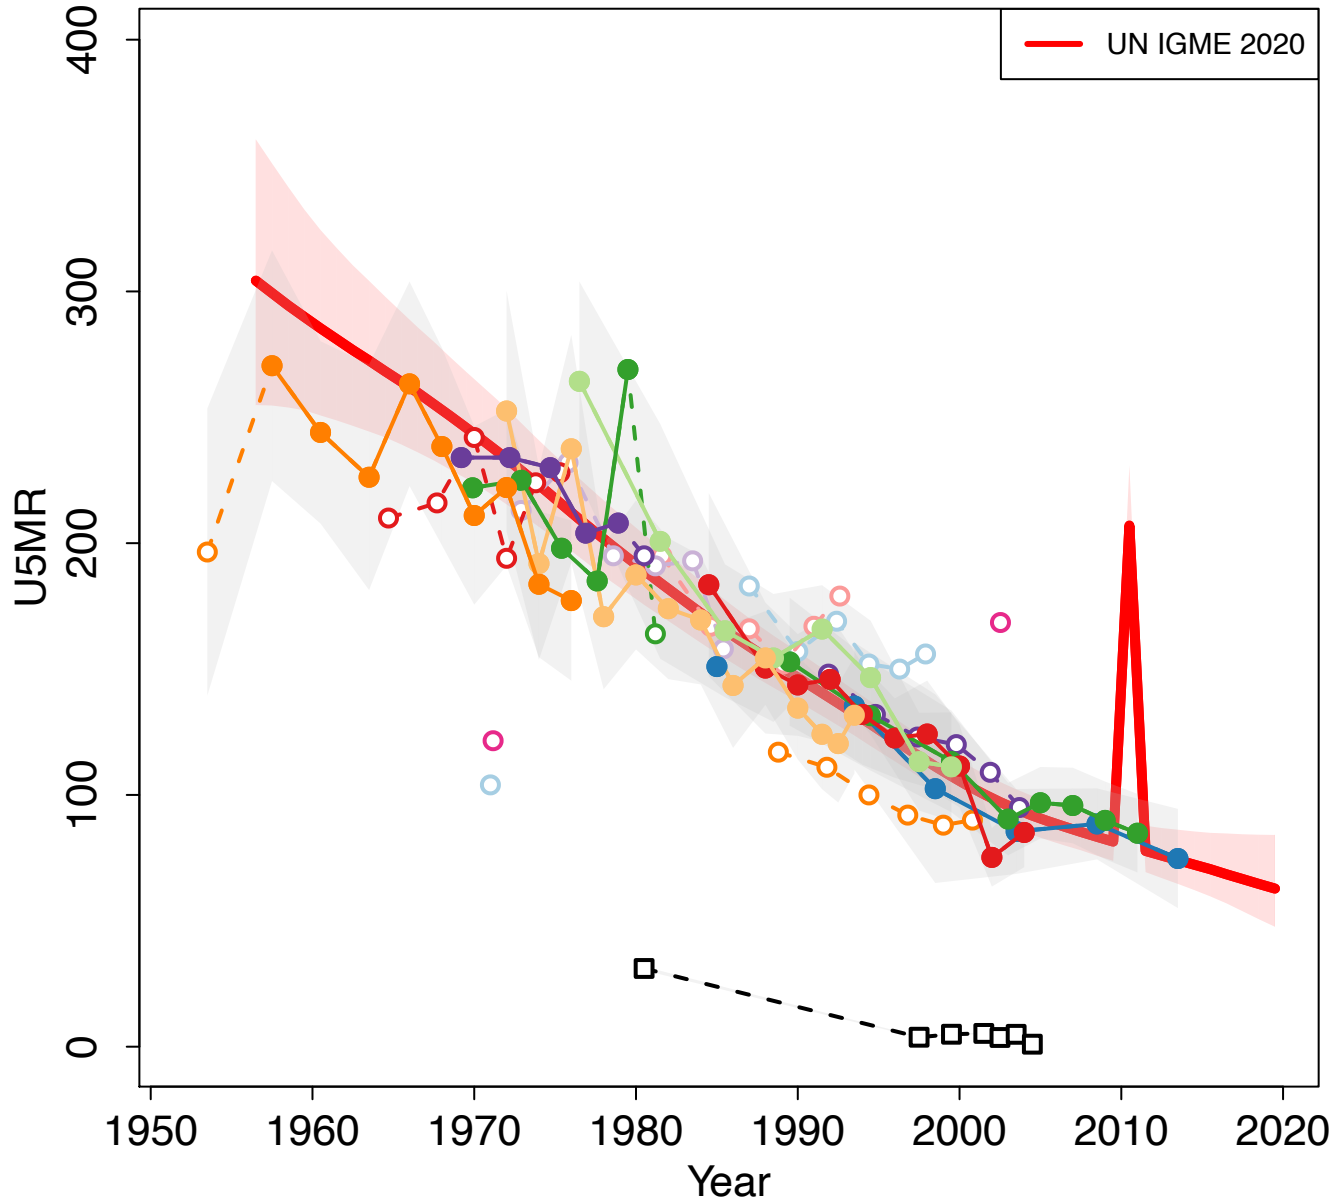

### Zoomed in

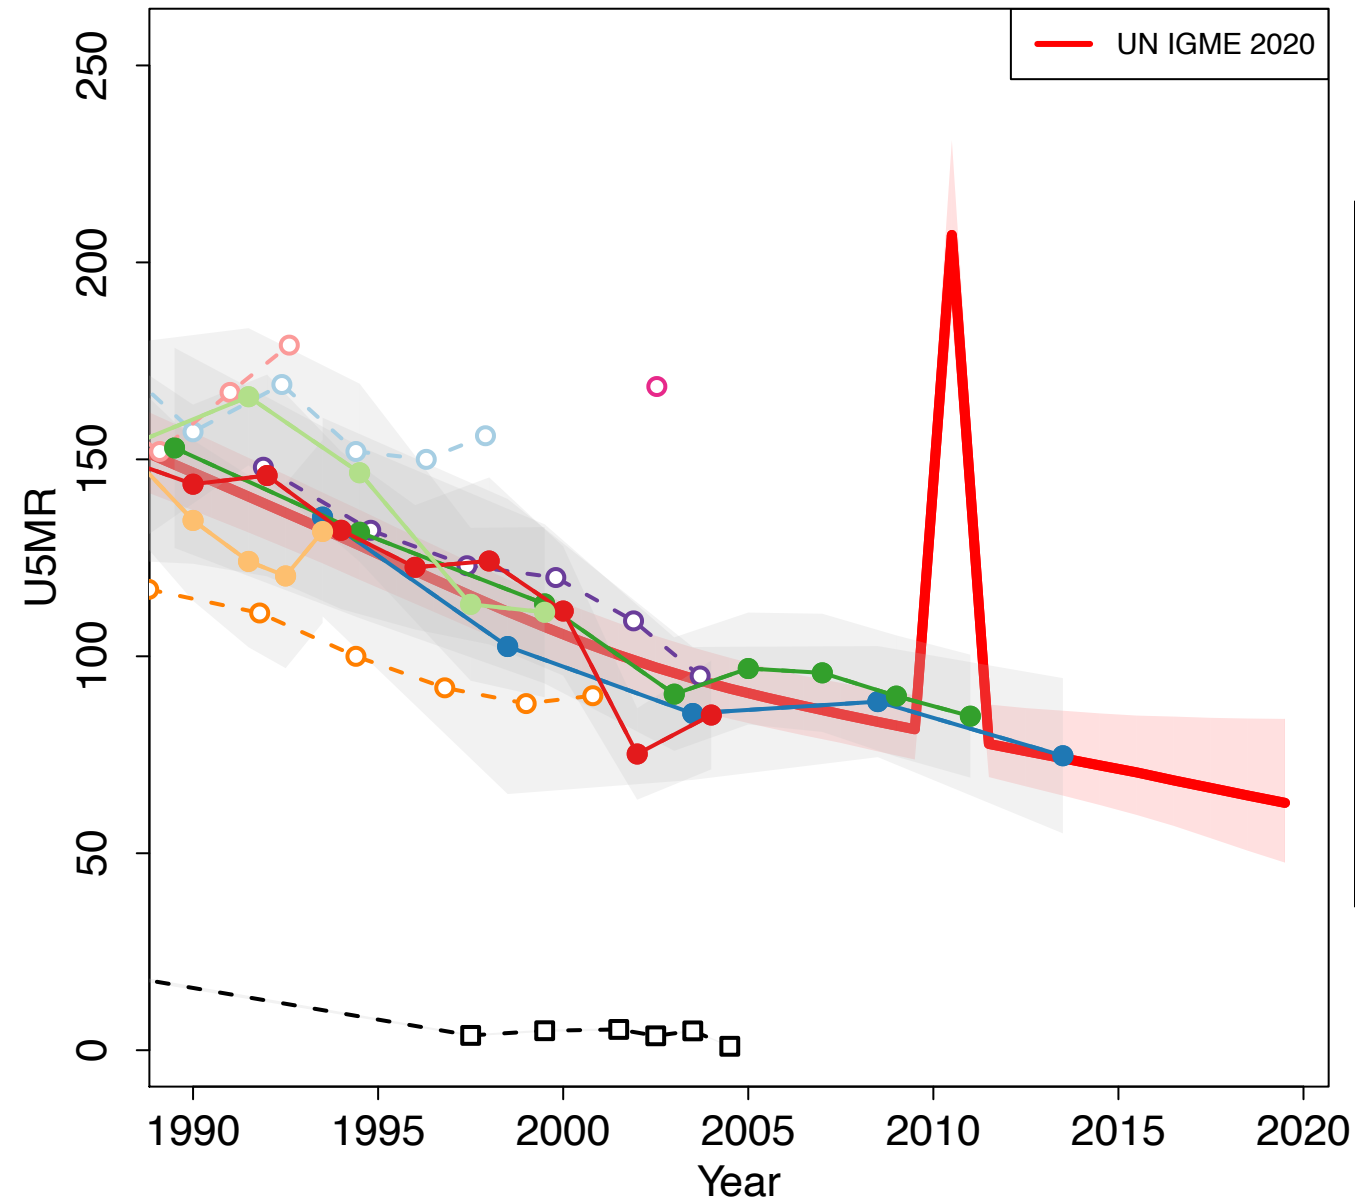

# Honduras

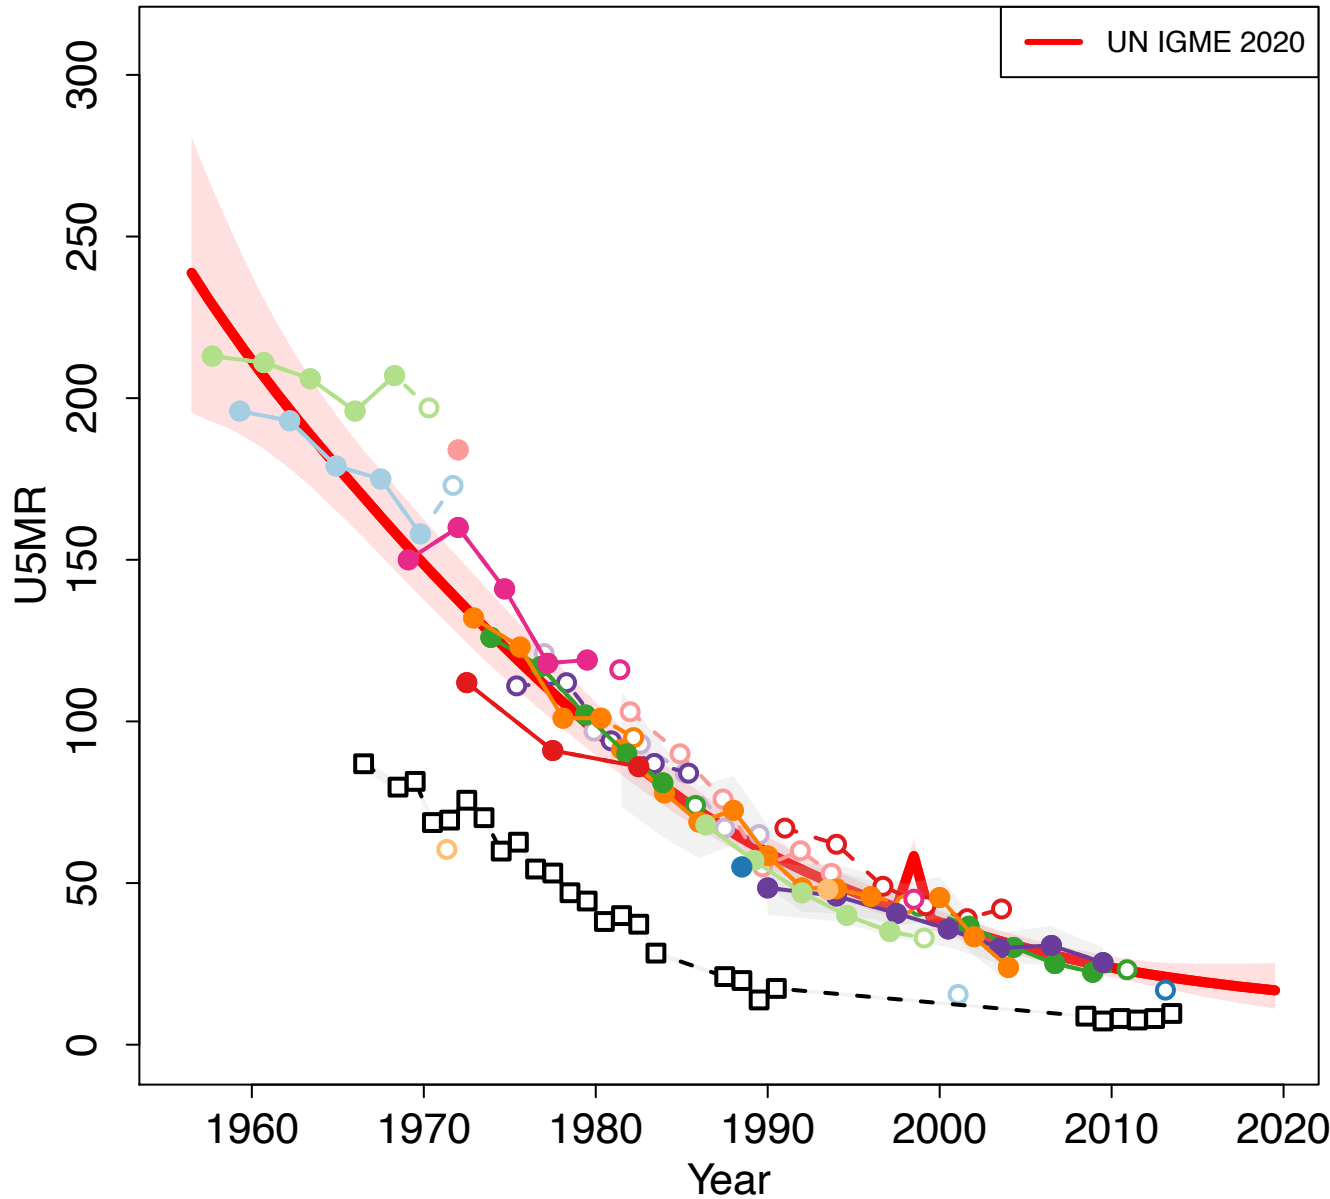

# Zoomed in

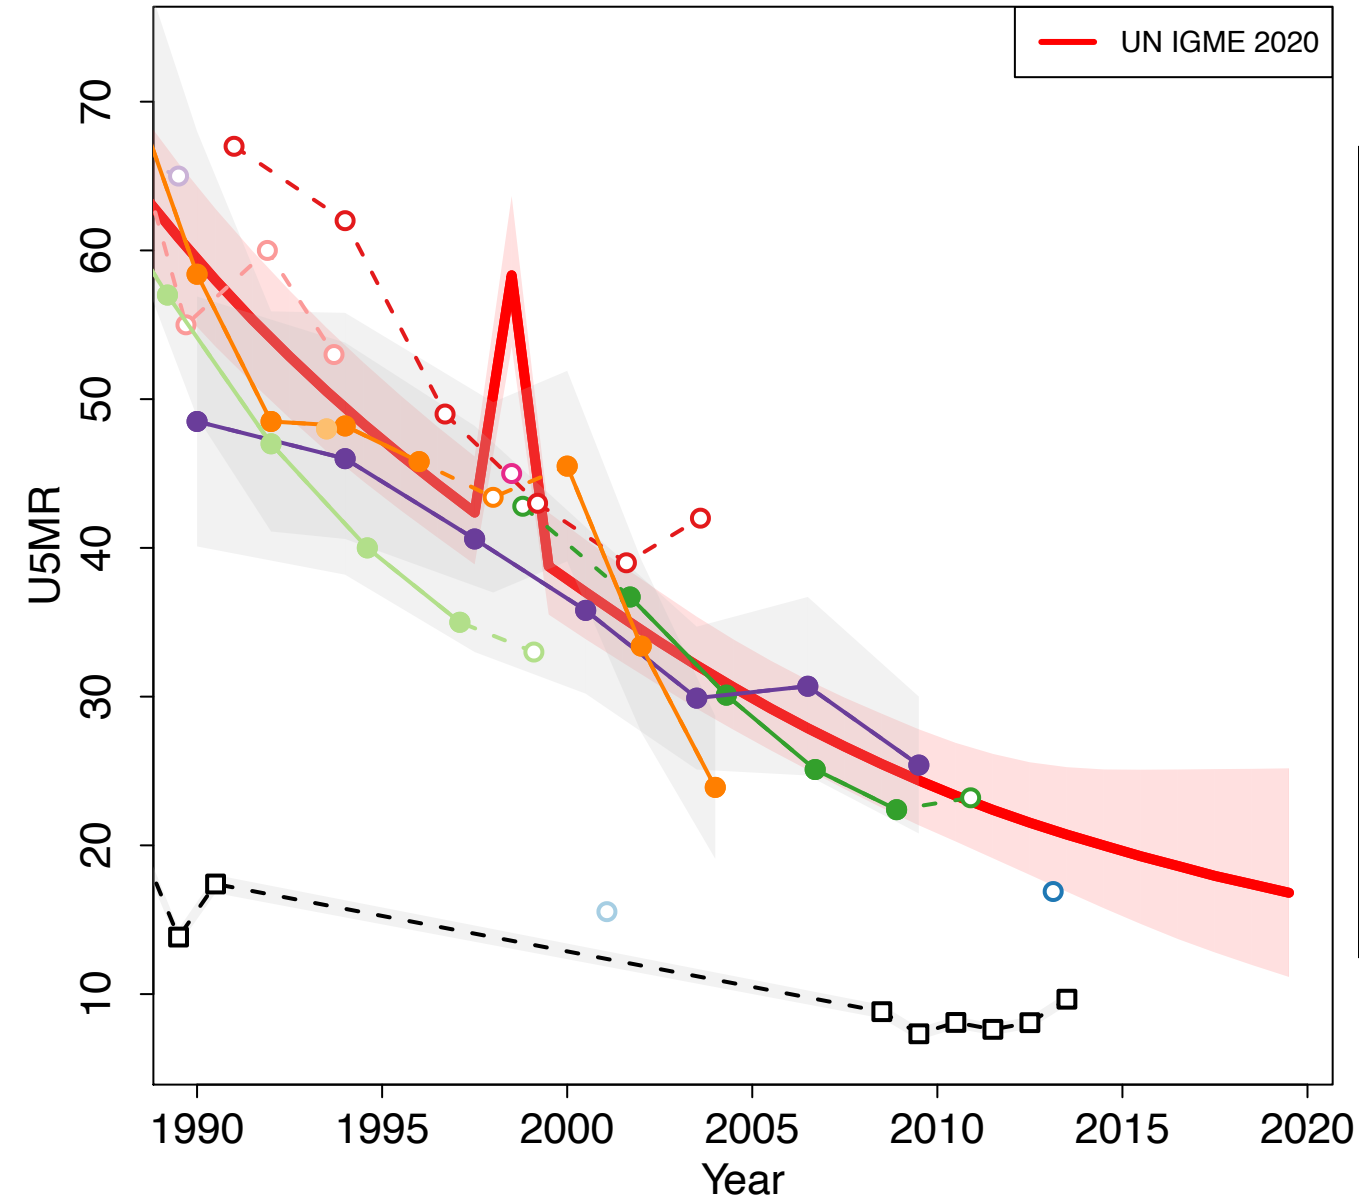

- National Demographic Survey 1970–1972 (Others Household Deaths)
- National Demographic Survey 1972 (Others Direct)
- National Demographic Survey 1972 (Others Indirect)
- Census 1974 (Census Indirect)
- National Demographic Survey 1983 (Others Indirect)
- National Survey of Maternal and Child Health 1984 (Others Indirect)
- National Survey of Epidemiology and Family Health 1987 (Others Direct)
- National Survey of Epidemiology and Family Health 1987 (Others Indirect)
- Census 1988 (Census Indirect)
- National Survey of Epidemiology and Family Health 1991–1992 (Others Direct)
- National Survey of Epidemiology and Family Health 1991–1992 (Others Indirect)
- National Survey of Epidemiology and Family Health 1996 (Others Direct)
- National Survey of Epidemiology and Family Health 1996 (Others Indirect)
- Census 2001 (Census Indirect)
- Census 2001 (Others Household Deaths)
- National Survey of Epidemiology and Family Health 2001 (Others Direct)
- Demographic and Health Survey 2005–2006 (DHS Direct)
- Demographic and Health Survey 2005–2006 (DHS Indirect)
- Demographic and Health Survey 2011–2012 (DHS Direct)
- Census 2013 (Census Indirect)
- Census 2013 (Others Household Deaths)
- VR WHO

# Hungary

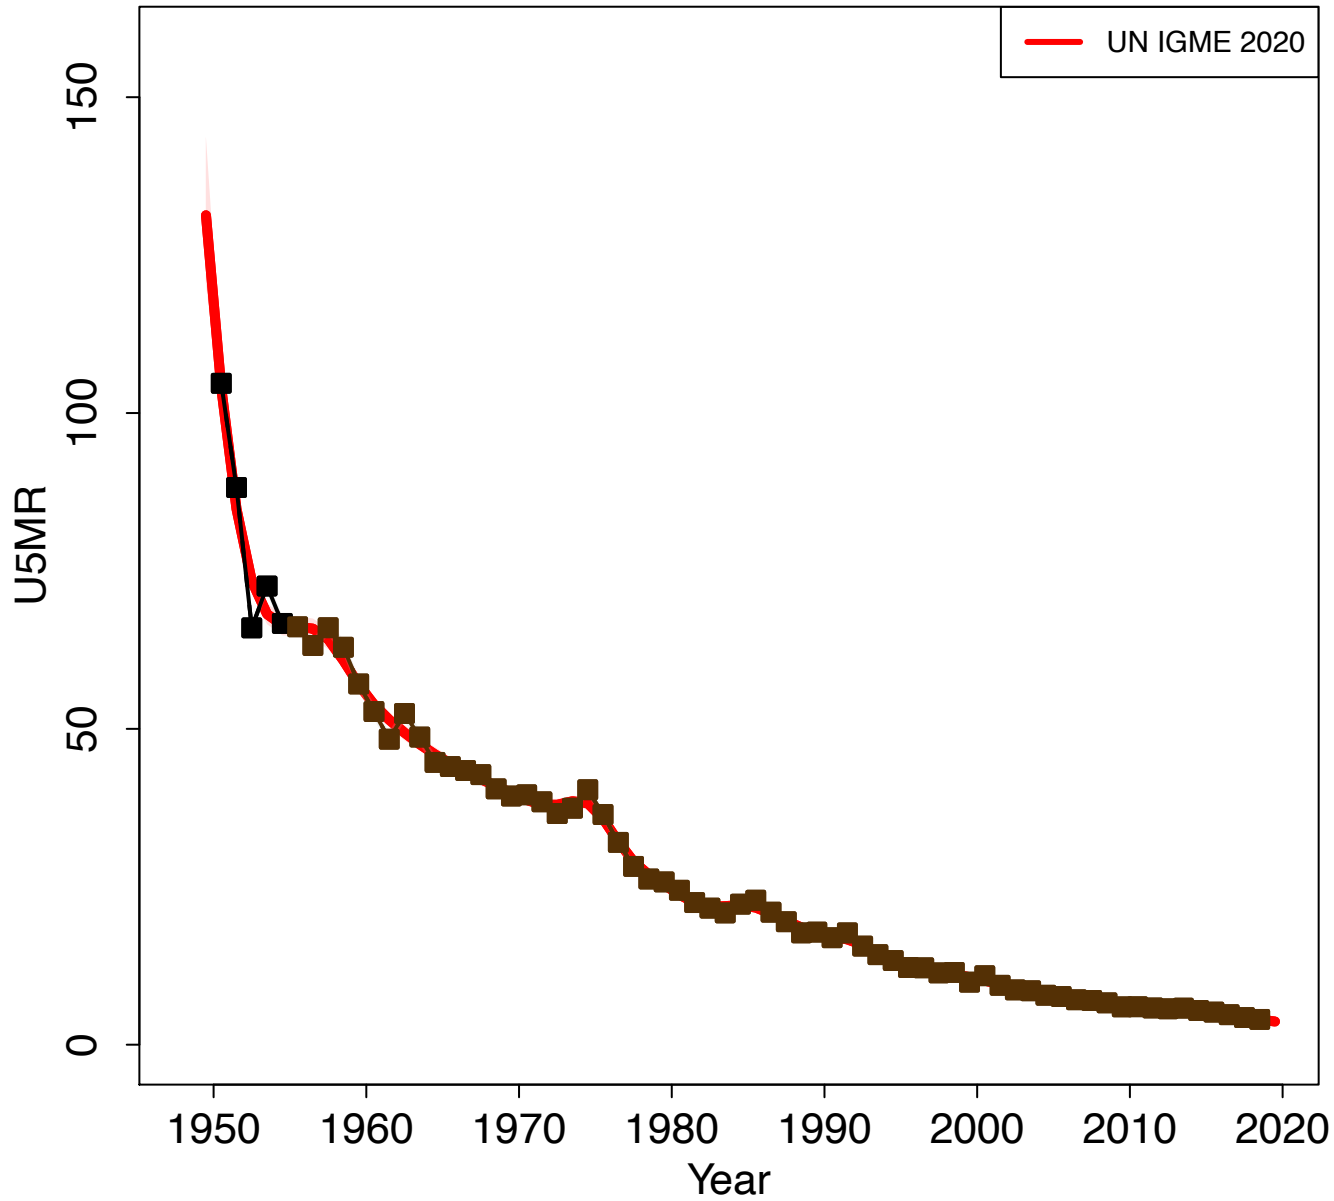

# Zoomed in

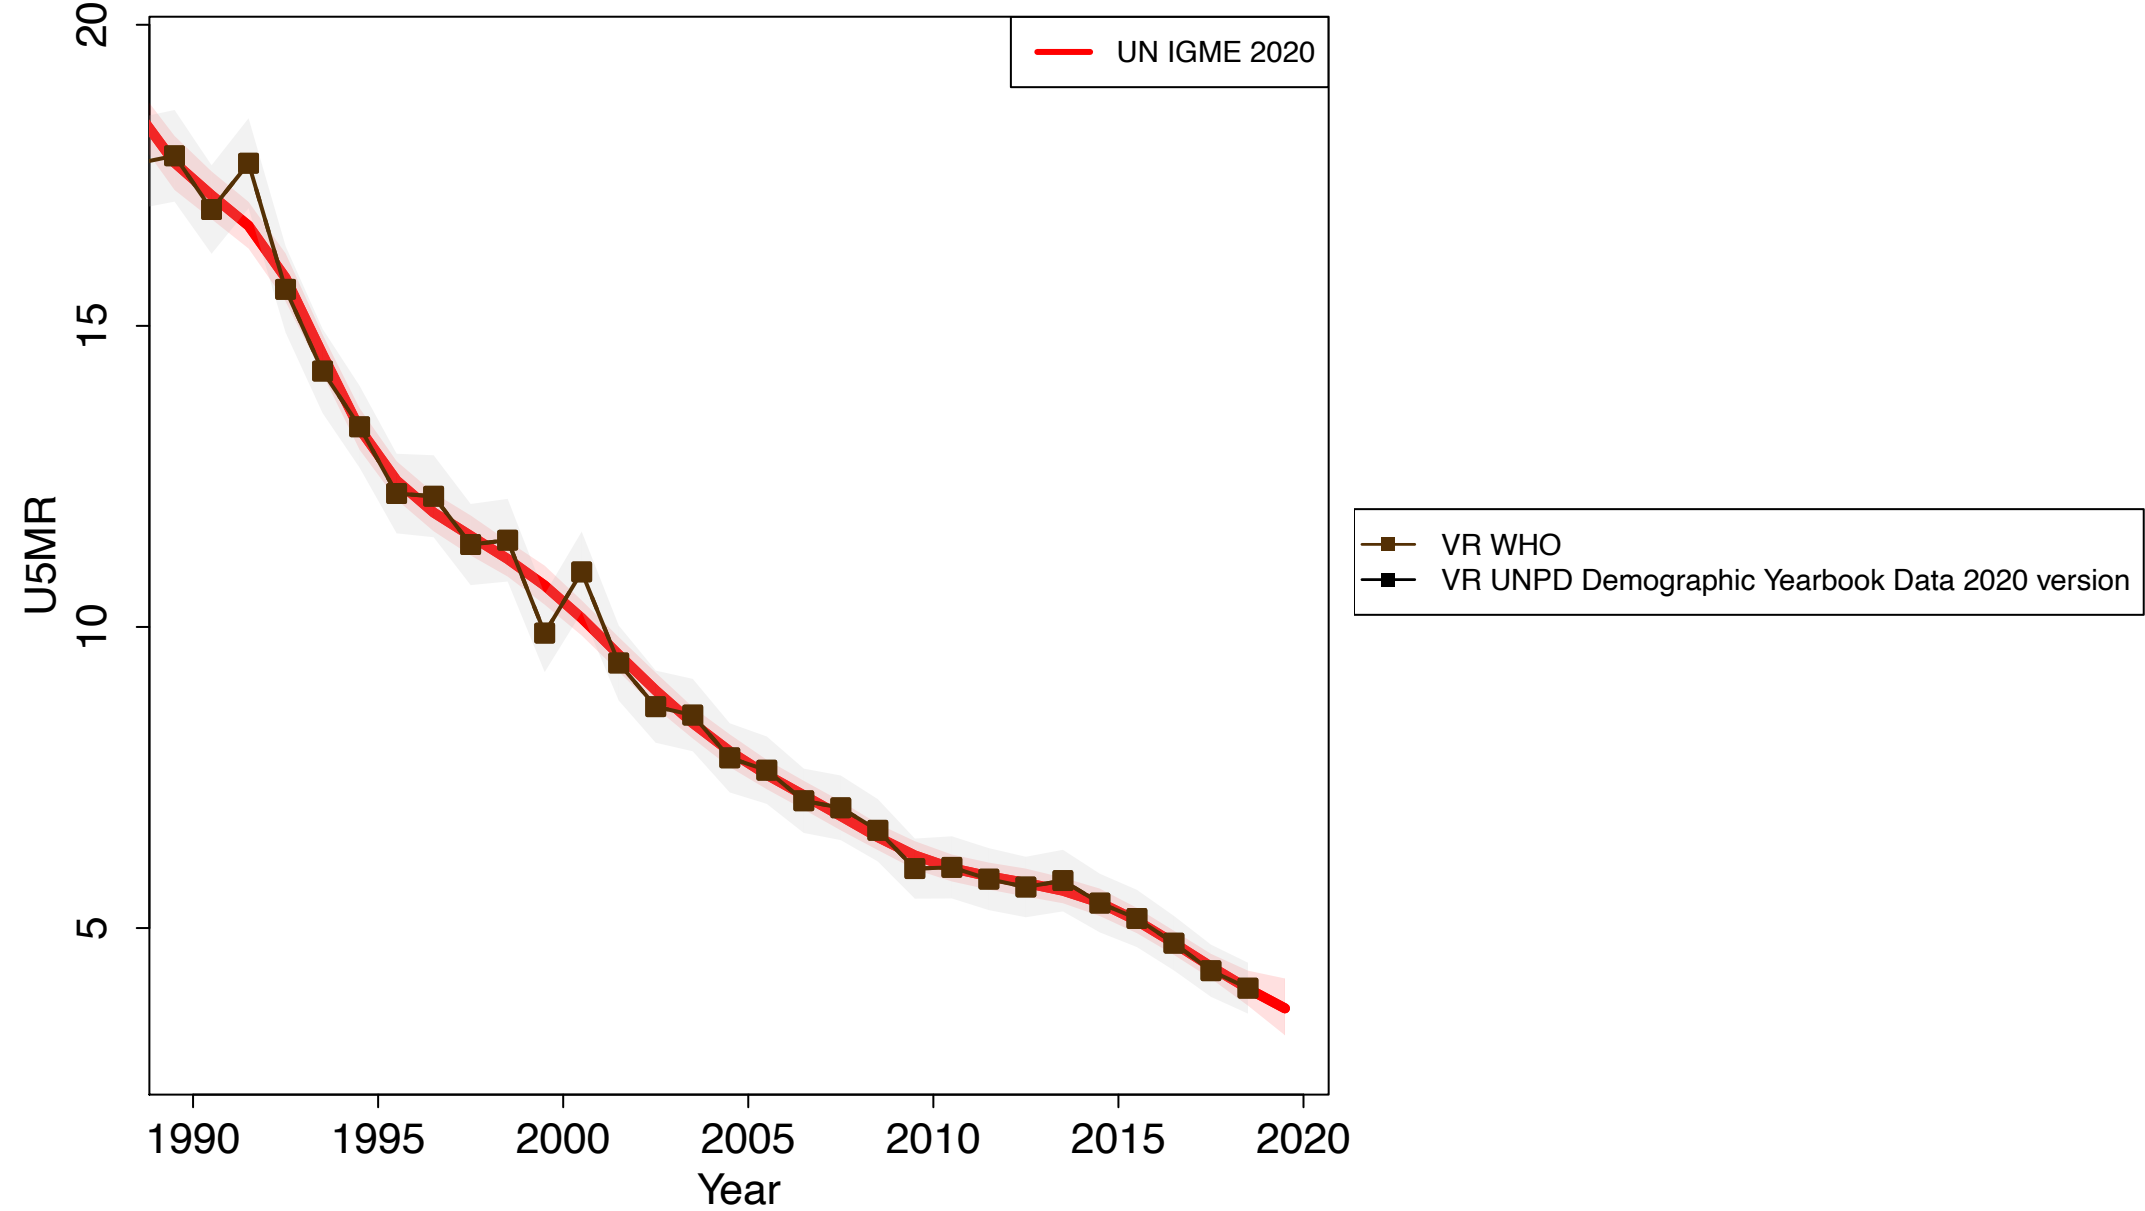

### Iceland

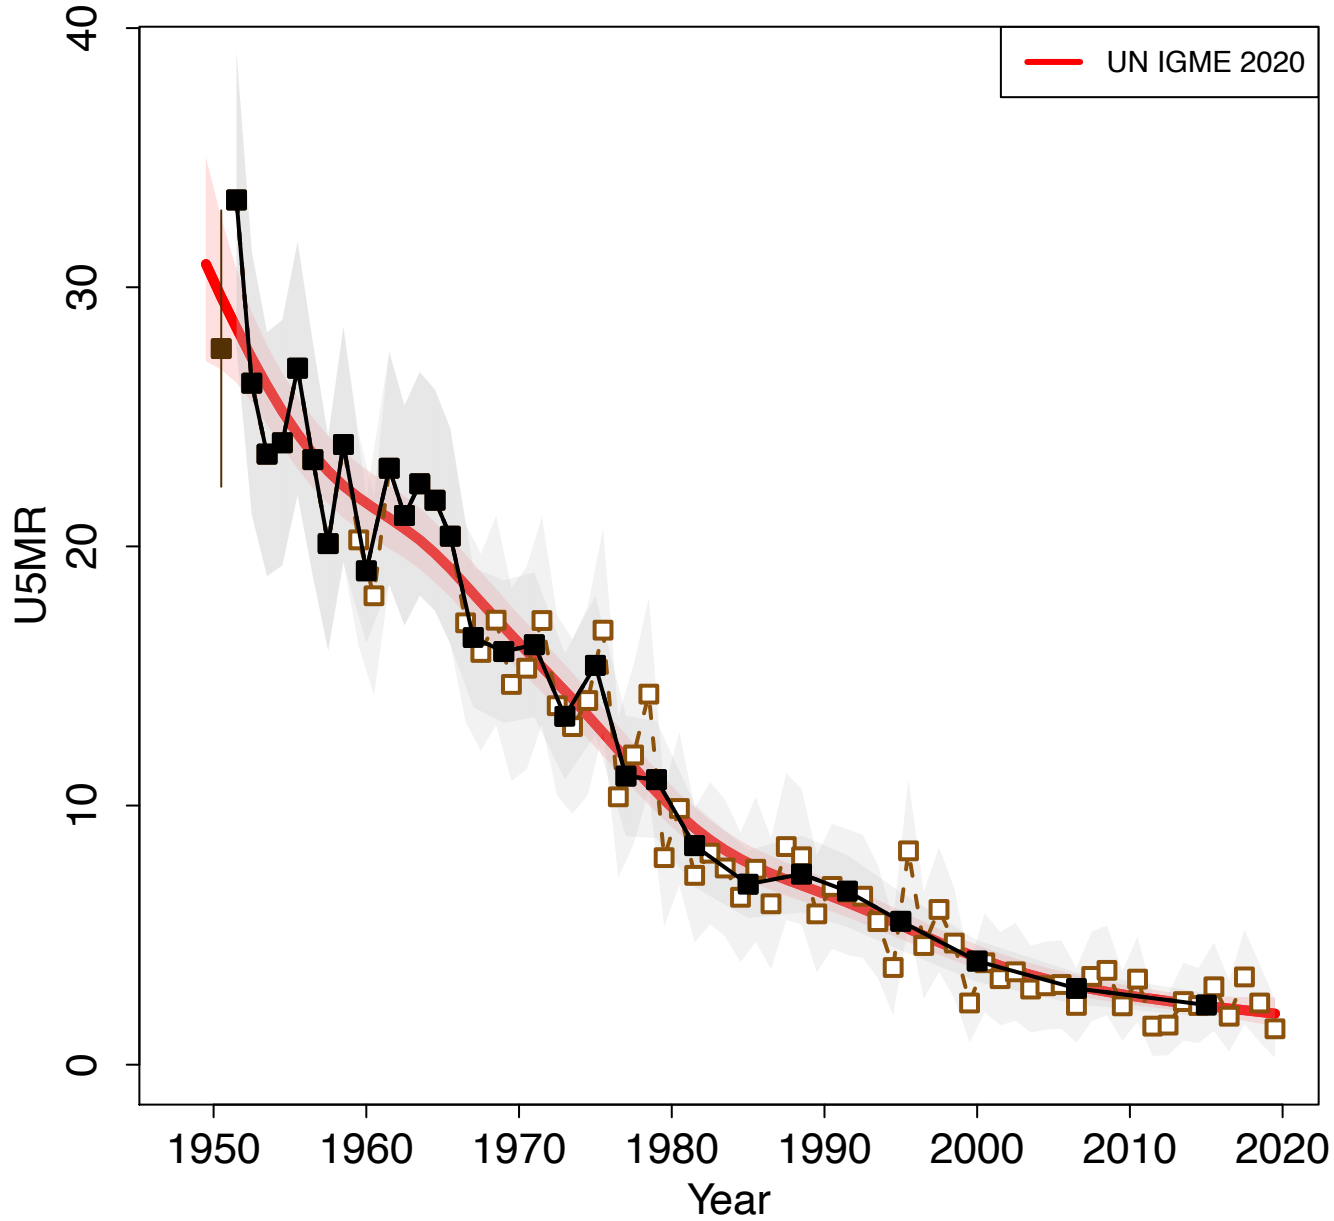

### Zoomed in

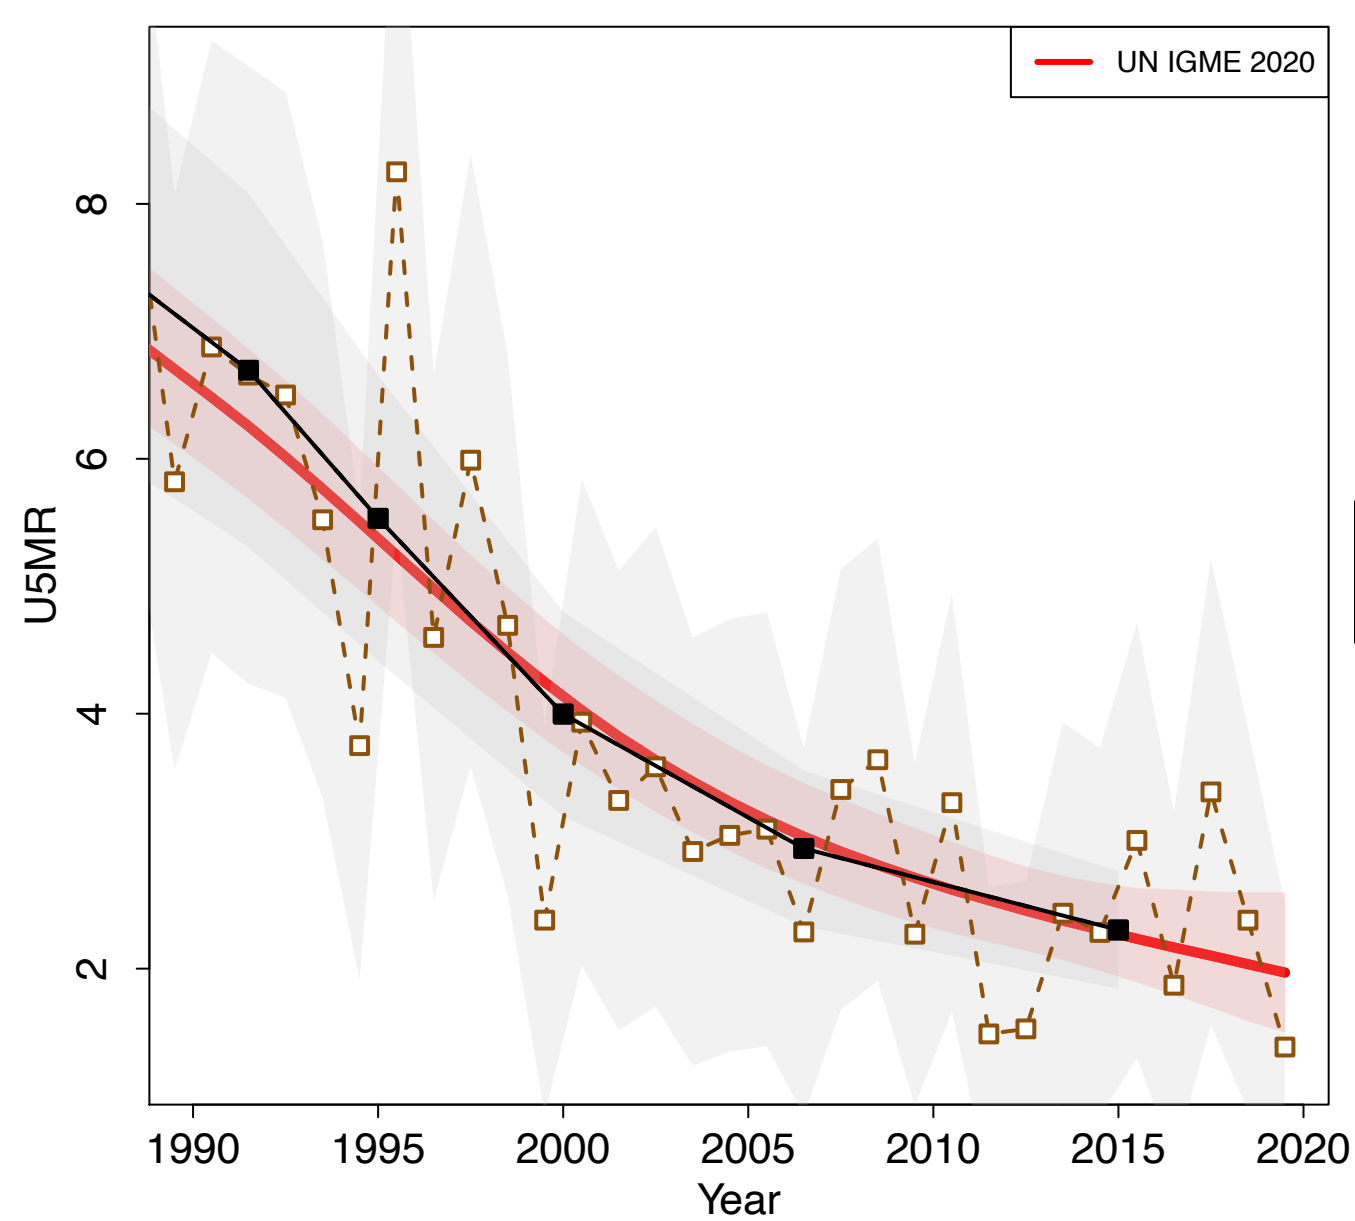

### India

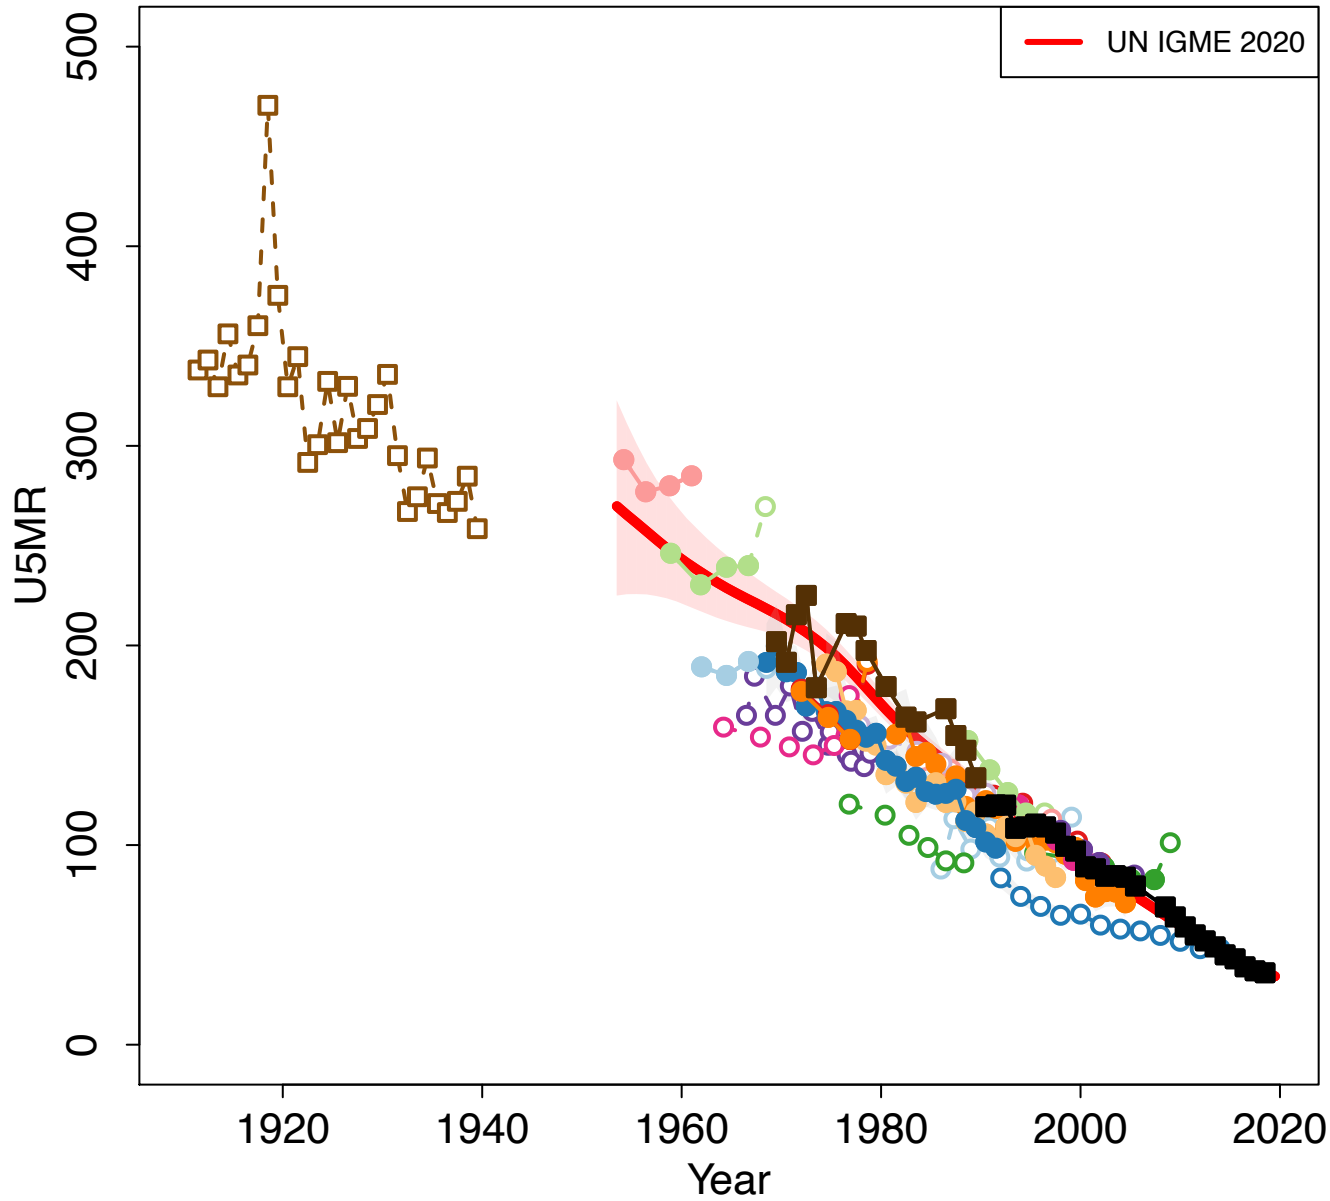

### Zoomed in

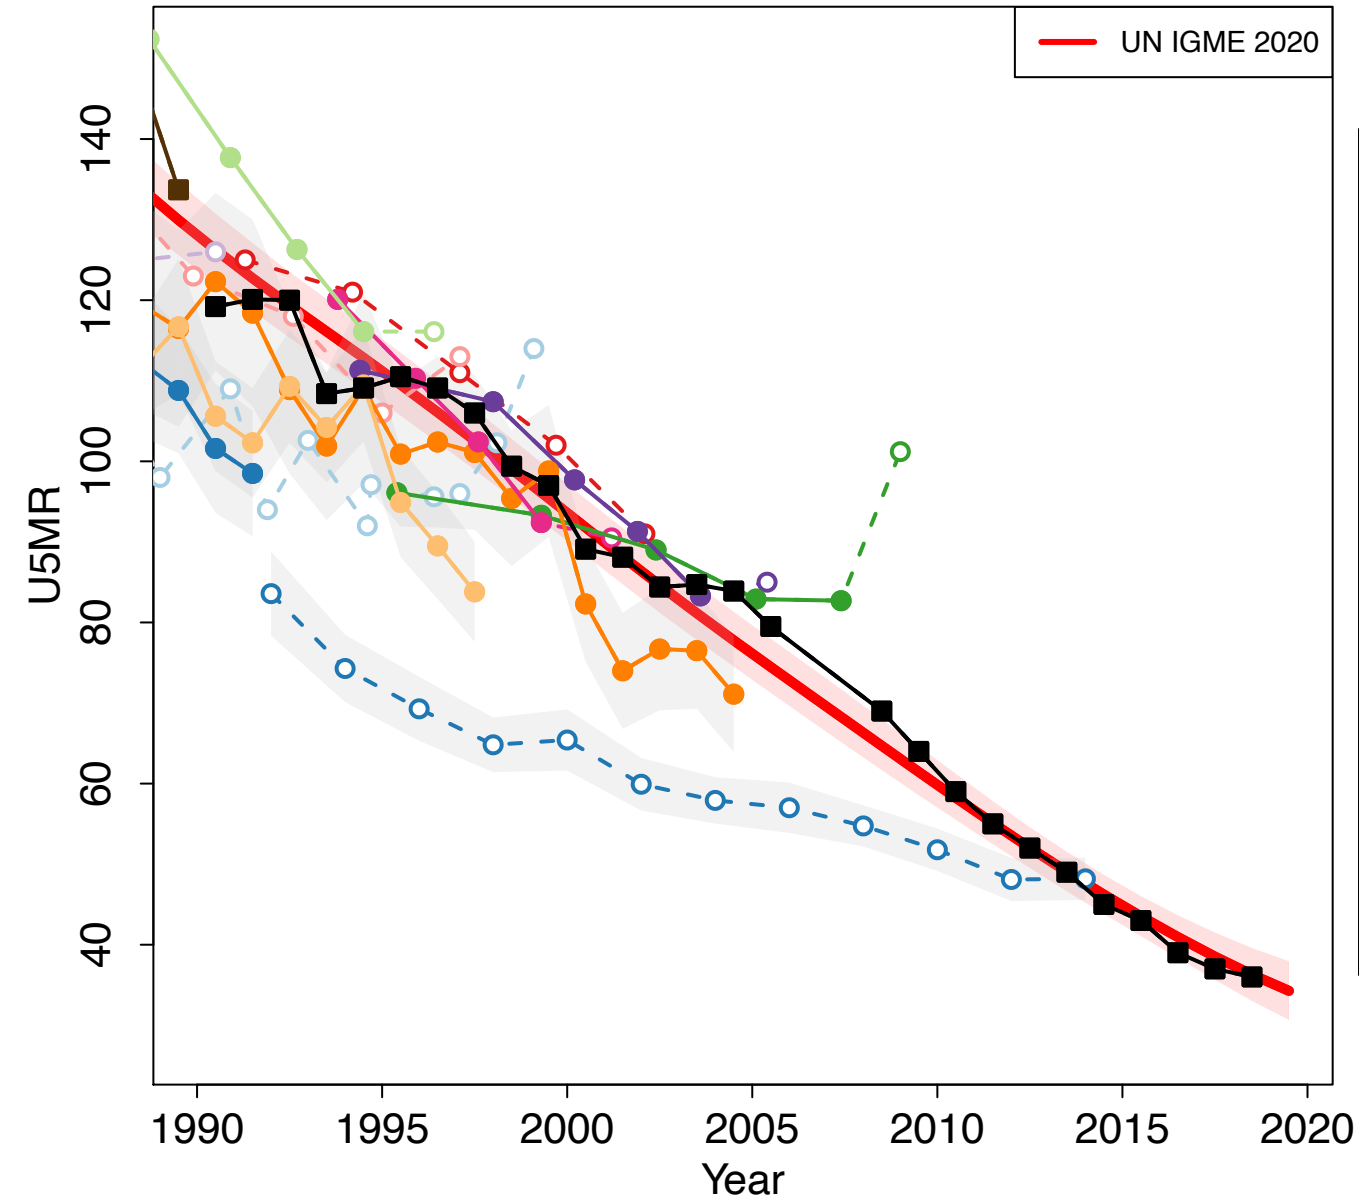

- National Sample Survey 1966 (Others Indirect)
- National Family Planning Survey 1970 (Others Indirect)
- National Fertility Survey 1972 (Others Indirect)
- Survey on Infant and Child Mortality 1979 (Others Indirect)
- National Family Planning Survey 1980 (Others Indirect)
- Second All-India Family Planning Survey 1981 (Others Indirect)
- Census 1981 (Census Indirect)
- Census 1991 (Census Indirect)
- National Family Health Survey 1992-1993 (DHS Direct)
- National Family Health Survey 1992-1993 (DHS Indirect)
- National Family Health Survey 1998-1999 (DHS Direct)
- National Family Health Survey 1998-1999 (DHS Indirect)
- District Level Household Survey 1999 (Others Indirect)
- Census 2001 (Census Indirect)
- District Level Household Survey 2004 (Others Indirect)
- National Family Health Survey 2005-2006 (DHS Direct)
- National Family Health Survey 2005-2006 (DHS Indirect)
- District Level Household Survey 2008 (Others Indirect)
- Census 2011 (Census Indirect)
- National Family Health Survey 2015-2016 (DHS Direct)
- SVR Provincial Annual Sanitary-Health Reports
- SVR Sample Registration System
- SVR Sample Registration System



# Indonesia

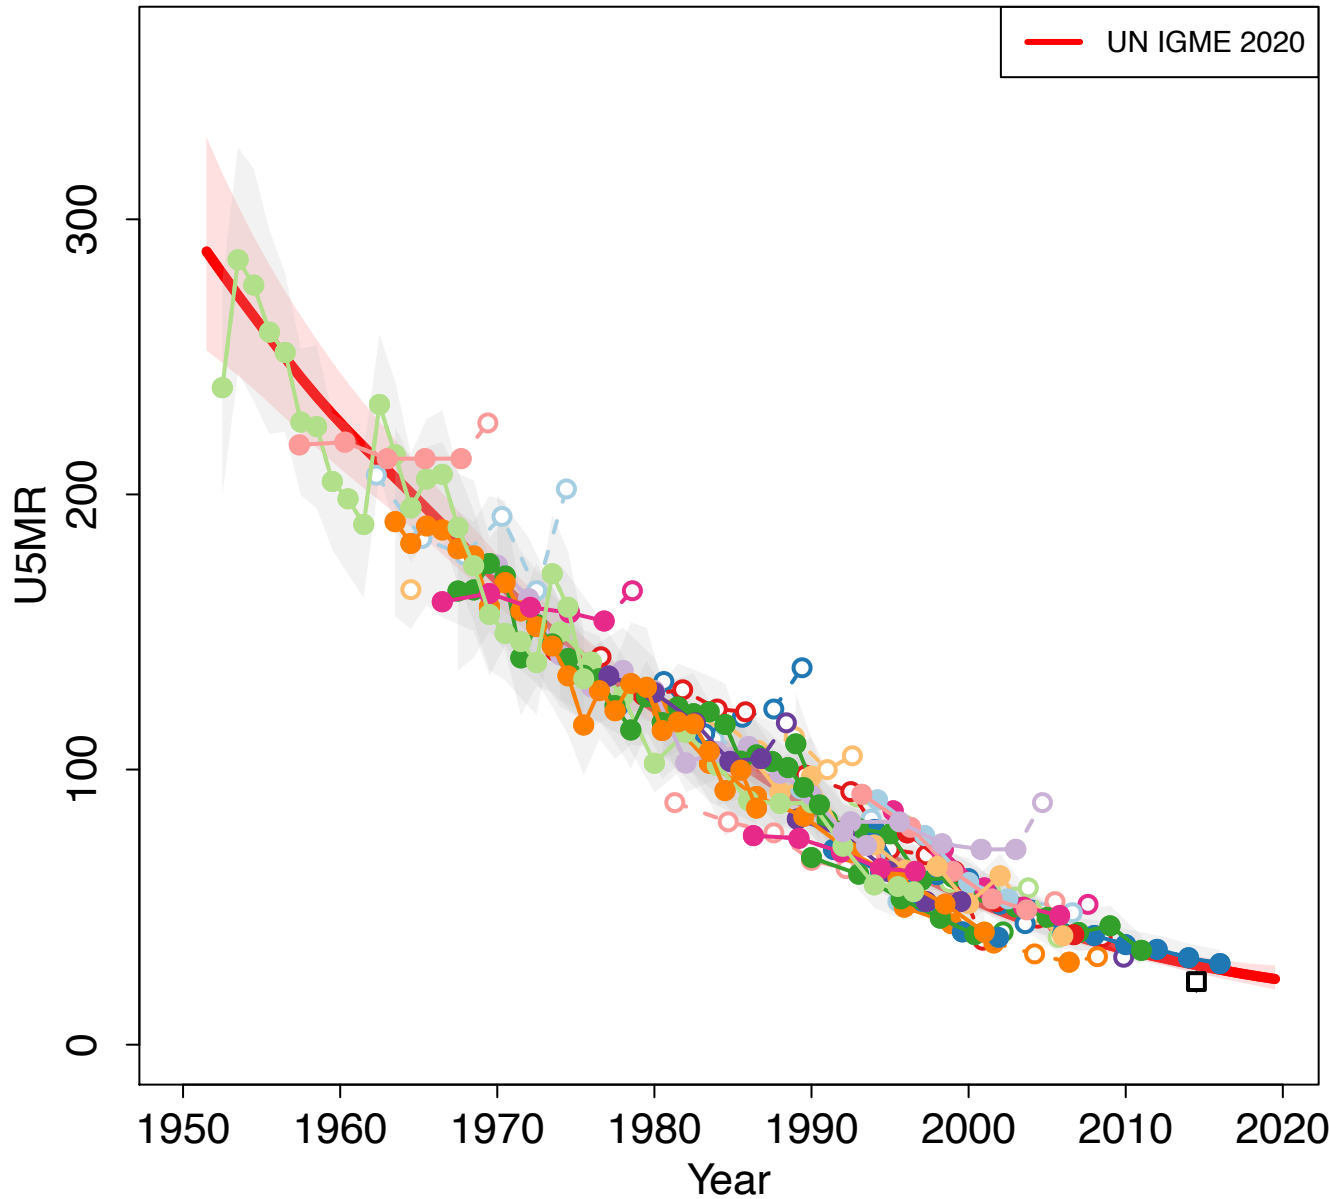

# Zoomed in

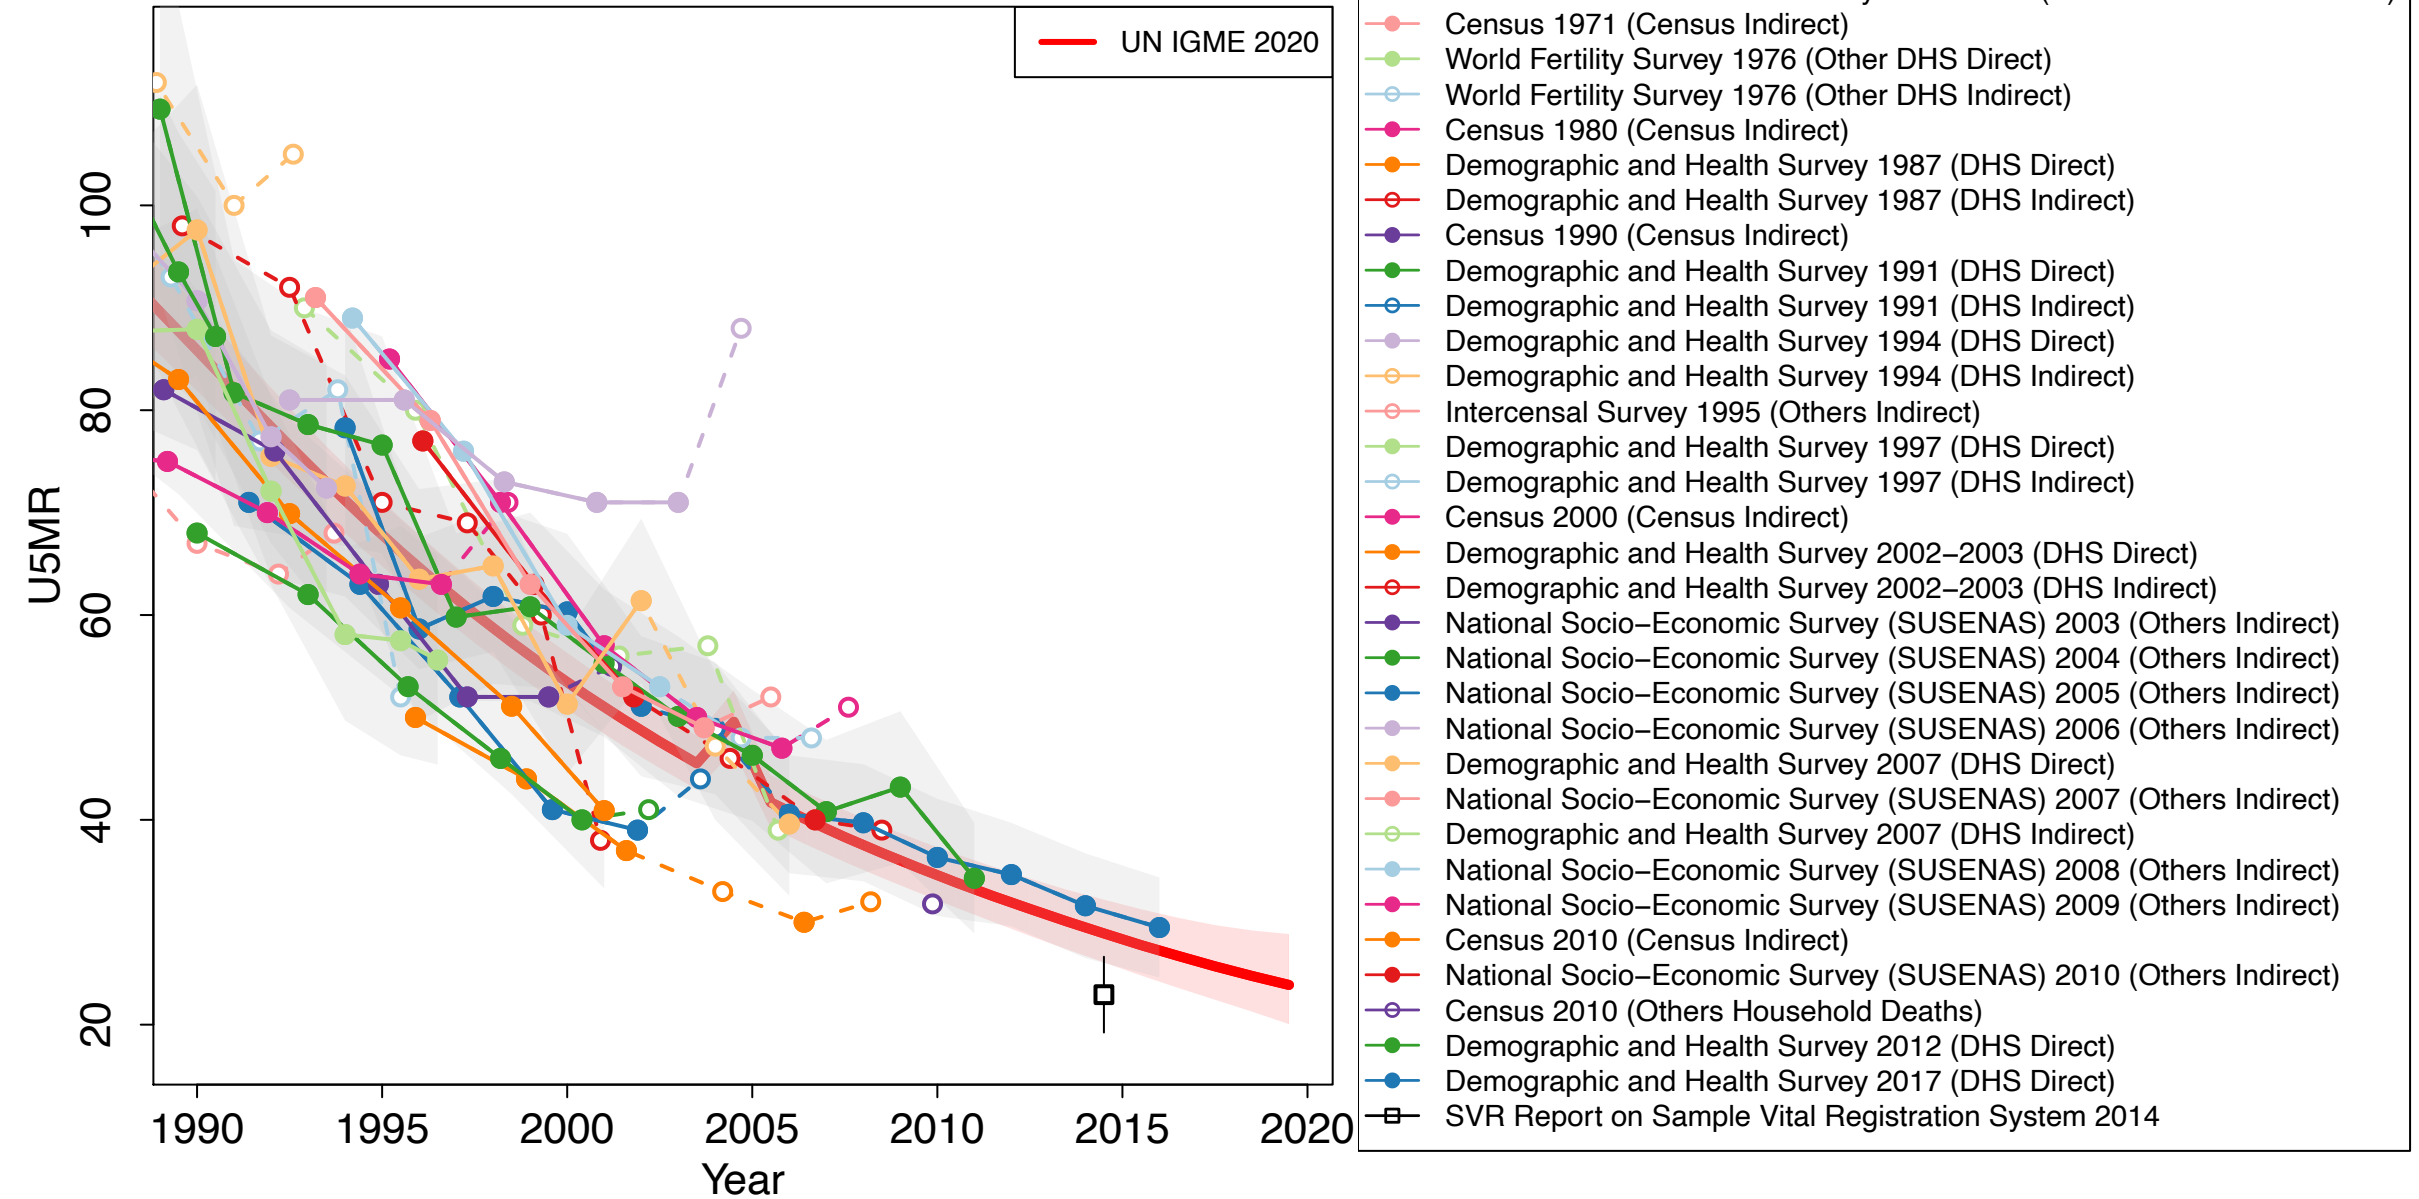



### Iran (Islamic Republic of)

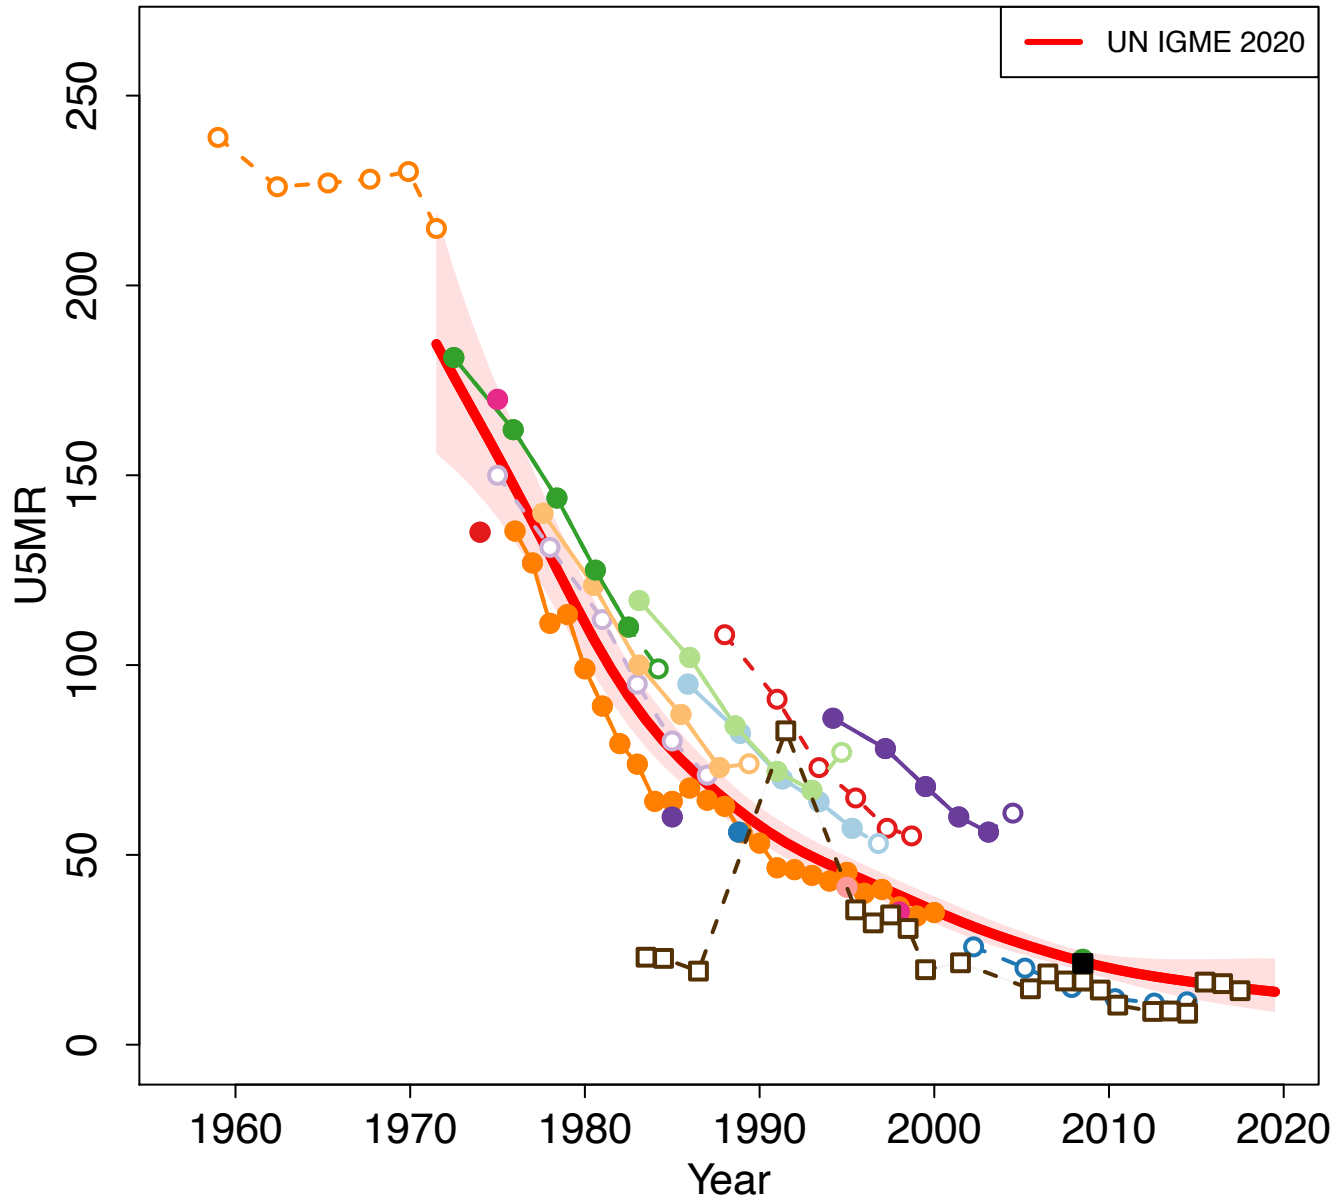

### Zoomed in

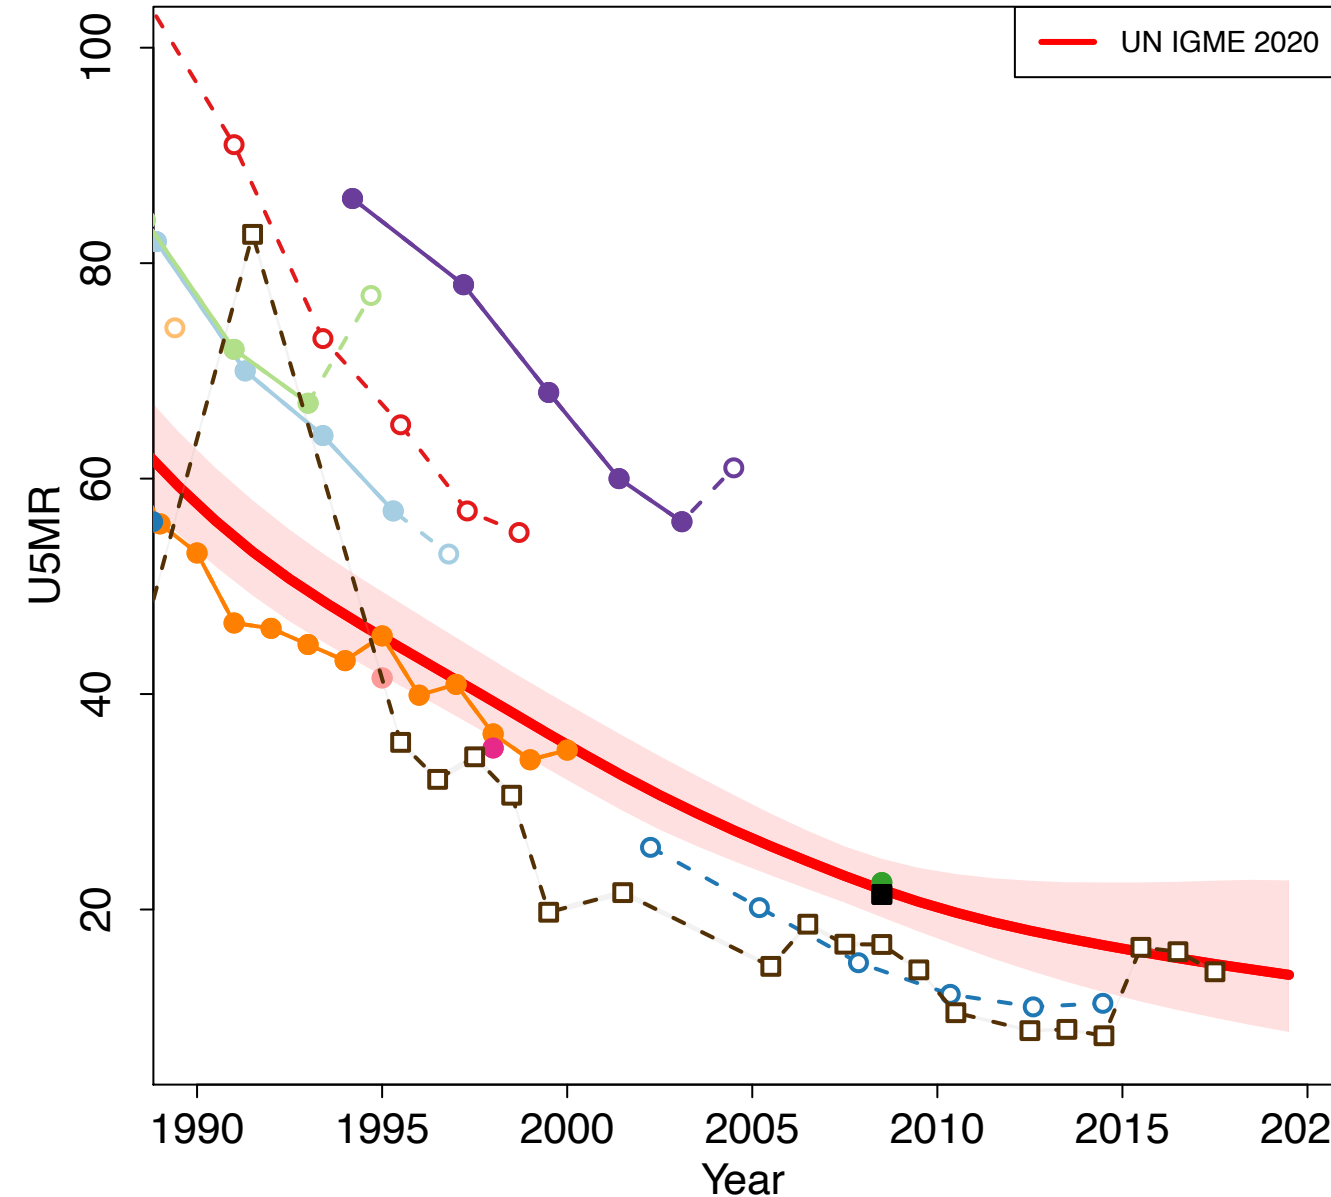

- Population Growth Survey 1973–1976 (Others Direct)
- Population Growth Survey 1973–1976 (Others Indirect)
- Population Health Survey 1974 (Others Direct)
- Iran National MICS 1985 (Others Household Deaths)
- Census 1986 (Census Indirect)
- Infant and Child Mortality Survey 1989 (Others Direct)
- Infant and Child Mortality Survey 1989 (Others Indirect)
- Intercensal Population Survey 1991 (Others Indirect)
- Iran National MICS 1995 (Others Household Deaths)
- Census 1996 (Census Indirect)
- Demographic Survey 1998 (Others Indirect)
- Iran National MICS 1998 (Others Household Deaths)
- Demographic and Health Survey 2000 (Other DHS Direct)
- Demographic and Health Survey 2000 (Other DHS Indirect)
- Census 2006 (Census Indirect)
- National Multiple-Indicator Demographic and Health Survey 2010 (Other DHS Direct)
- Census 2016 (Census Indirect)
- VR WHO
- VR Iran National Child Mortality Surveillance System

### Iraq

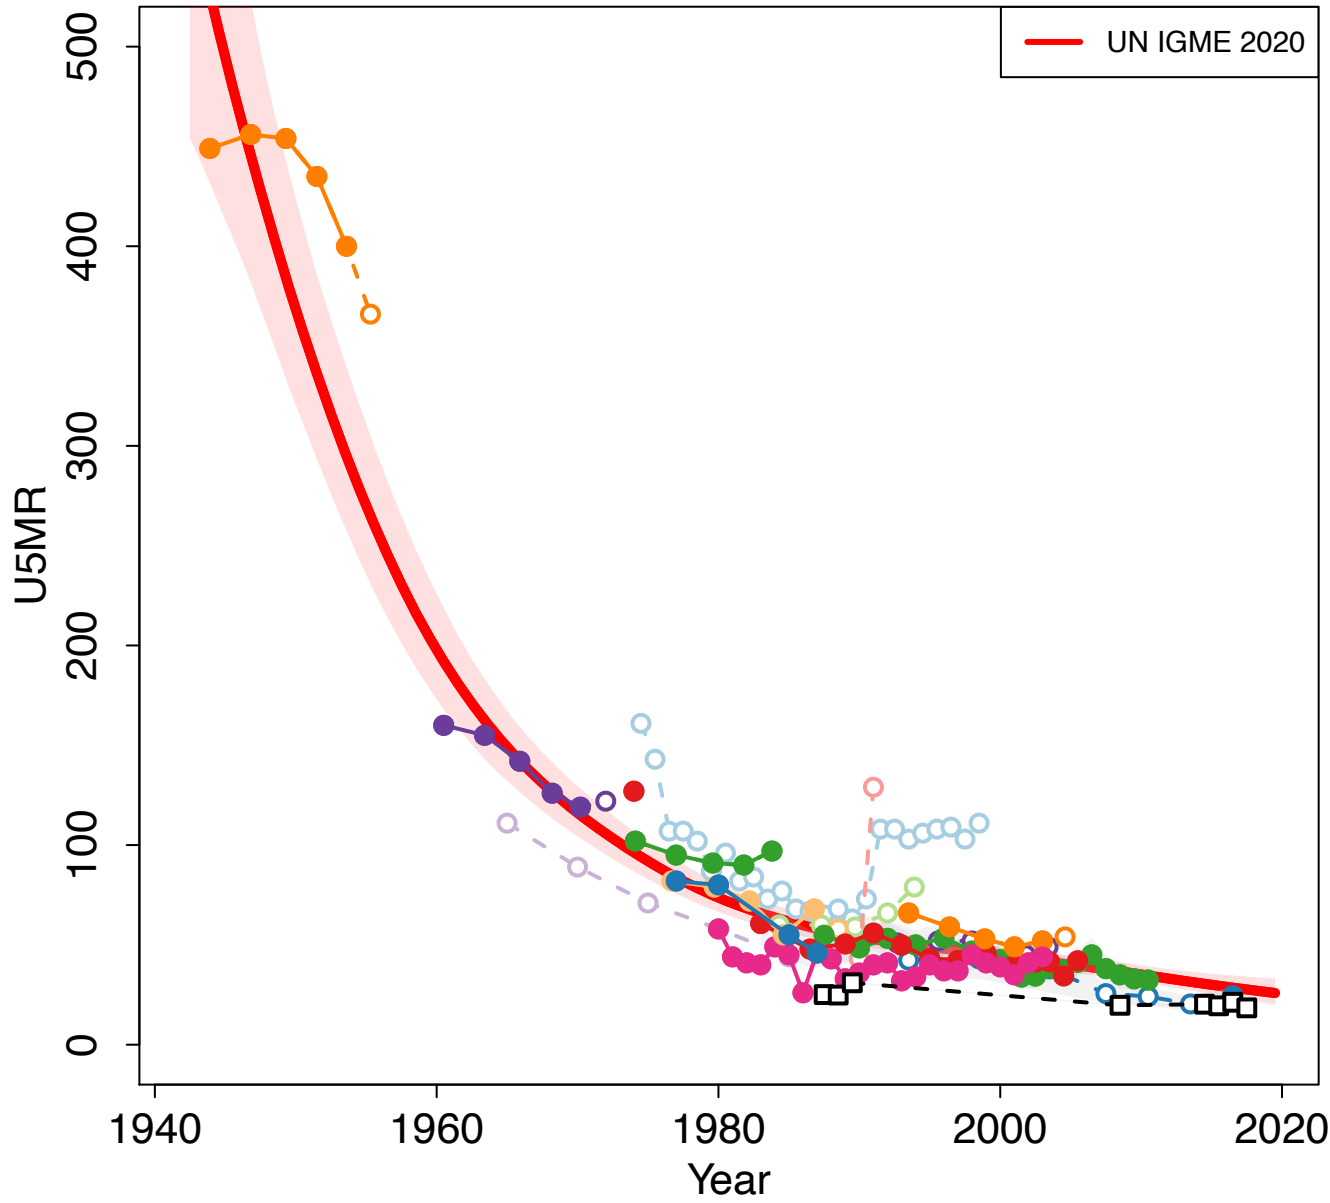

### Zoomed in

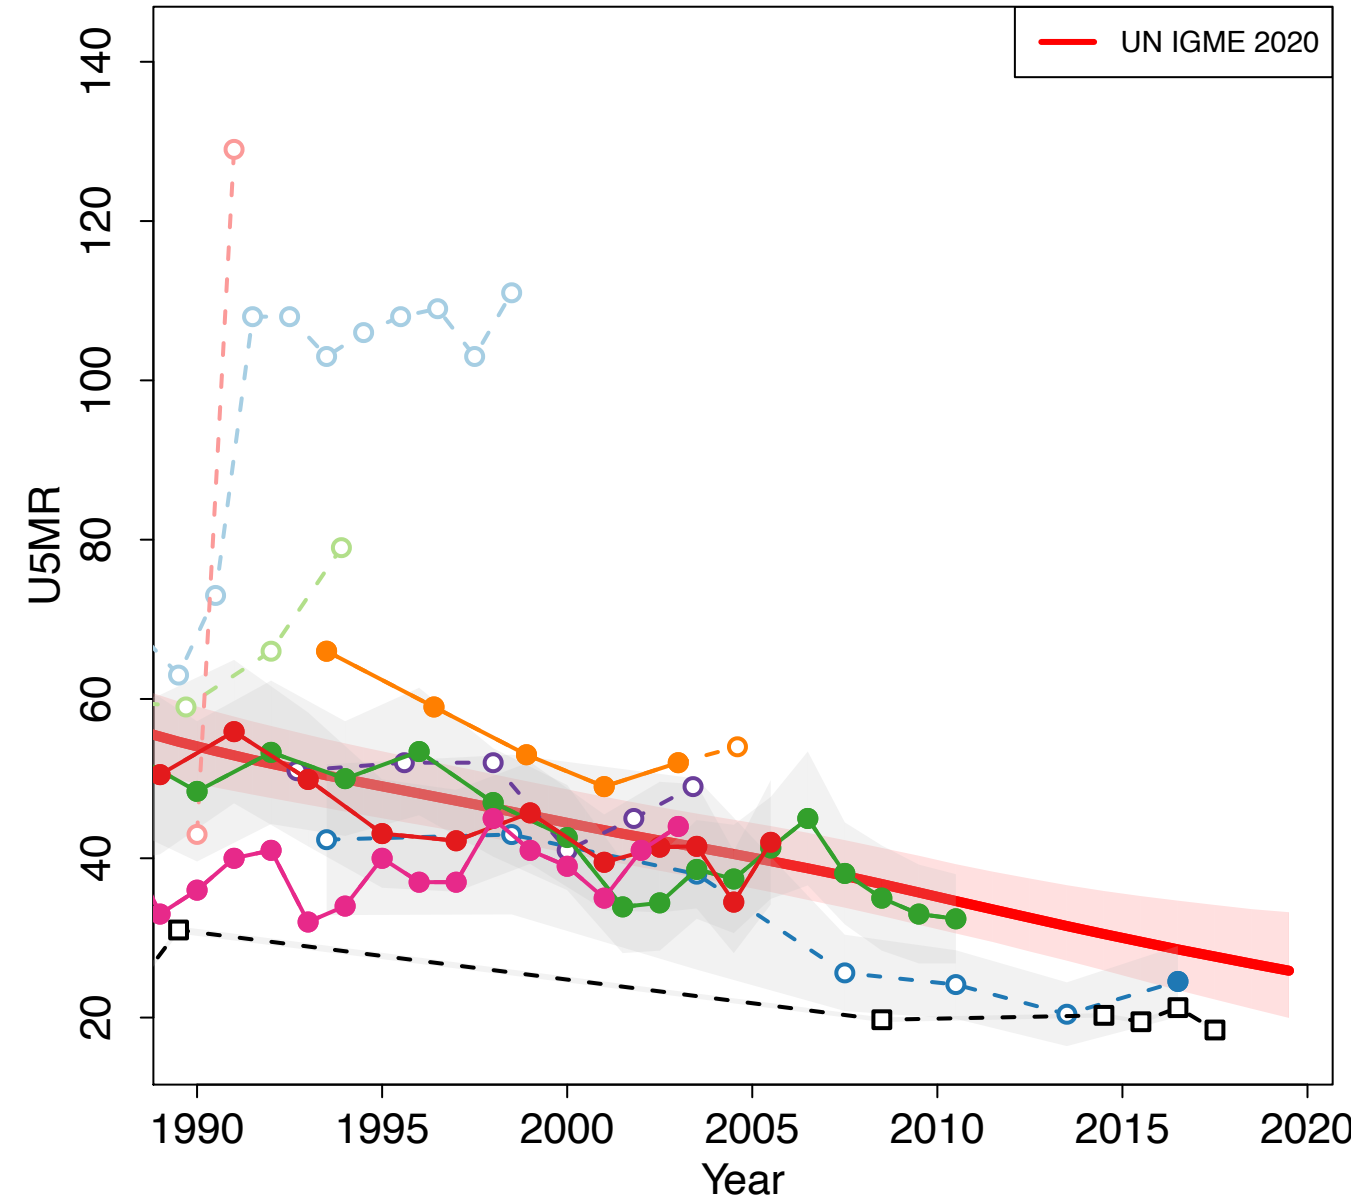

- Census 1957 (Census Indirect)
- Demographic Sample Survey and Sample Registration System 1973 (Others Direct)
- Fertility Survey 1974 (Others Indirect)
- Census 1987 (Census Indirect)
- Gulf Child Health Survey 1989 (Others Indirect)
- Gulf Child Health Survey 1989 (Others Direct)
- Immunization, Diarrhoeal Disease, Maternal and Child Mortality Survey 1990 (Others Indirect)
- Infant and Child Mortality and Nutrition Survey 1991 (Others Direct)
- Census 1997 (Census Indirect)
- Child and Maternal Mortality Survey 1999 (Others Direct)
- Living Conditions Survey 2004 (Others Direct)
- Iraq Family Health Survey 2006 (Others Indirect)
- Multiple Indicator Cluster Survey 2006 (MICS Direct)
- Multiple Indicator Cluster Survey 2006 (Others Indirect)
- Multiple Indicator Cluster Survey 2011 (MICS Direct)
- Multiple Indicator Cluster Survey 2018 (MICS Direct)
- VR WHO

### Ireland

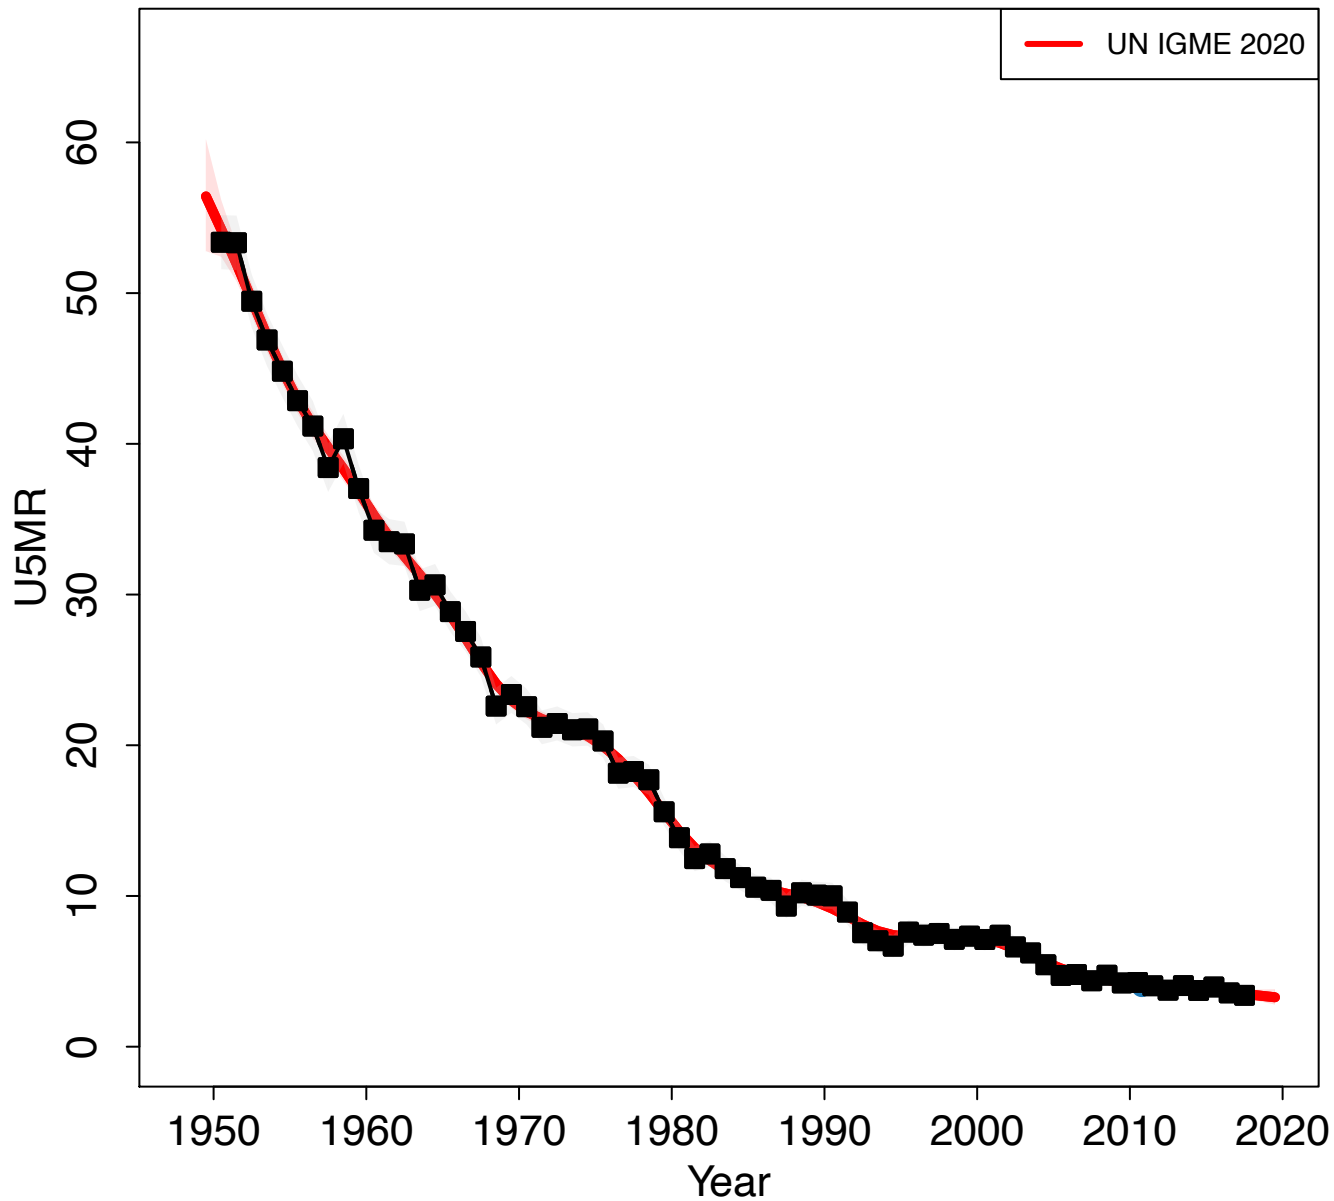

### Zoomed in

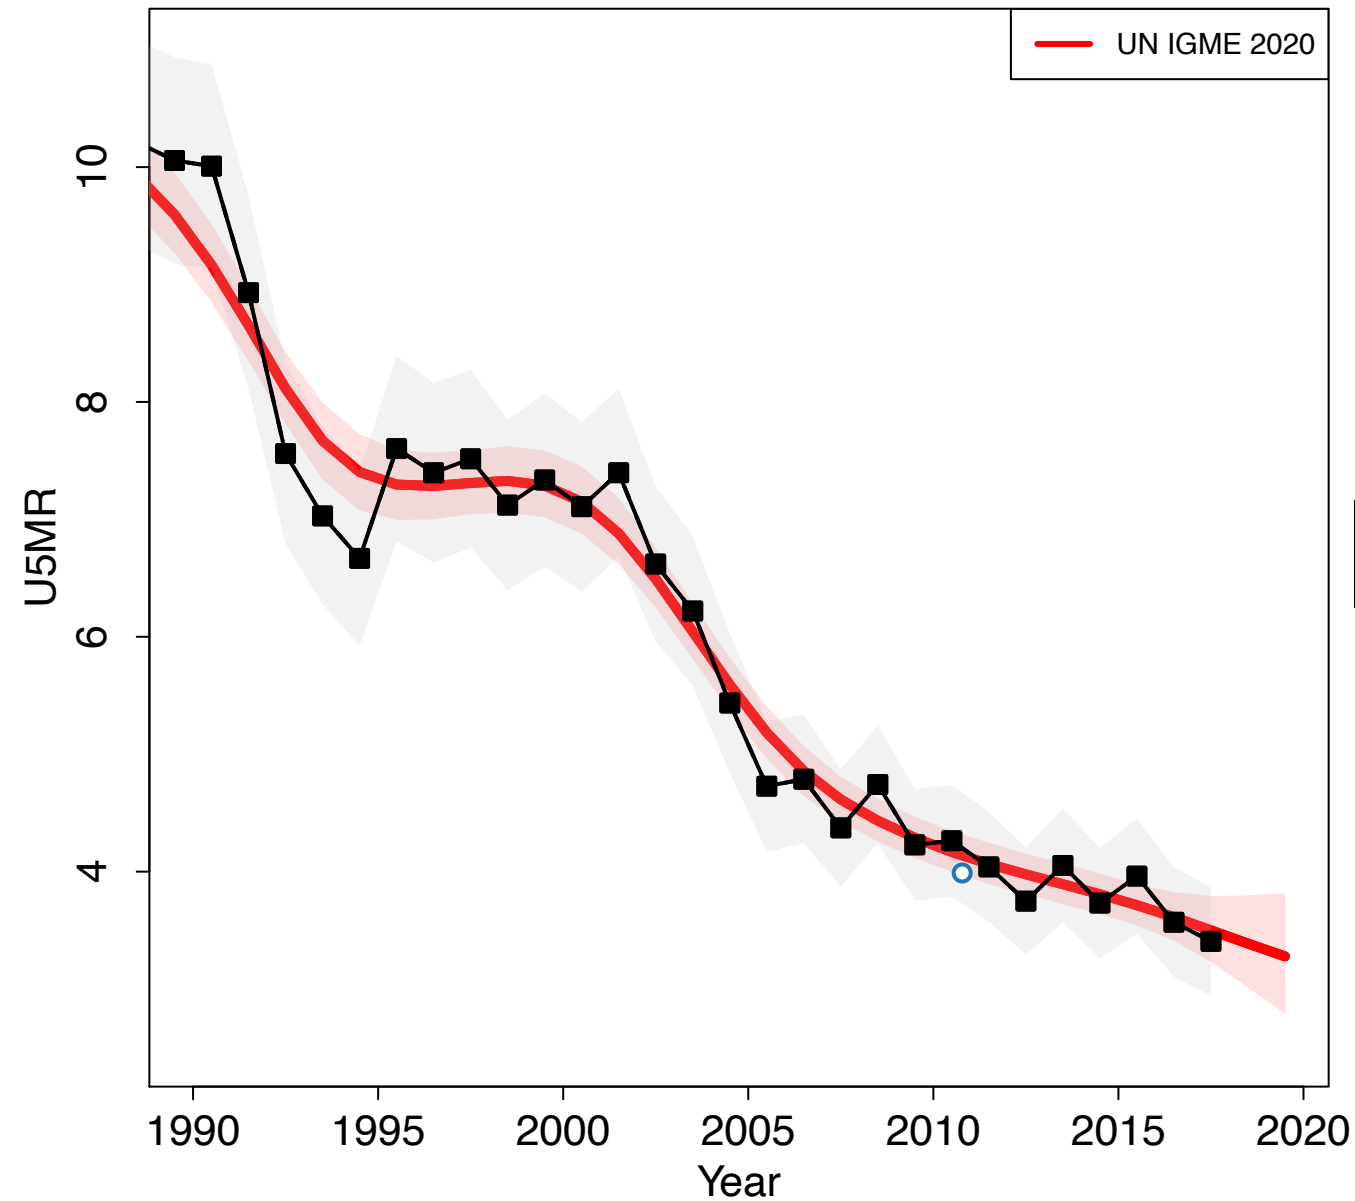

### Israel

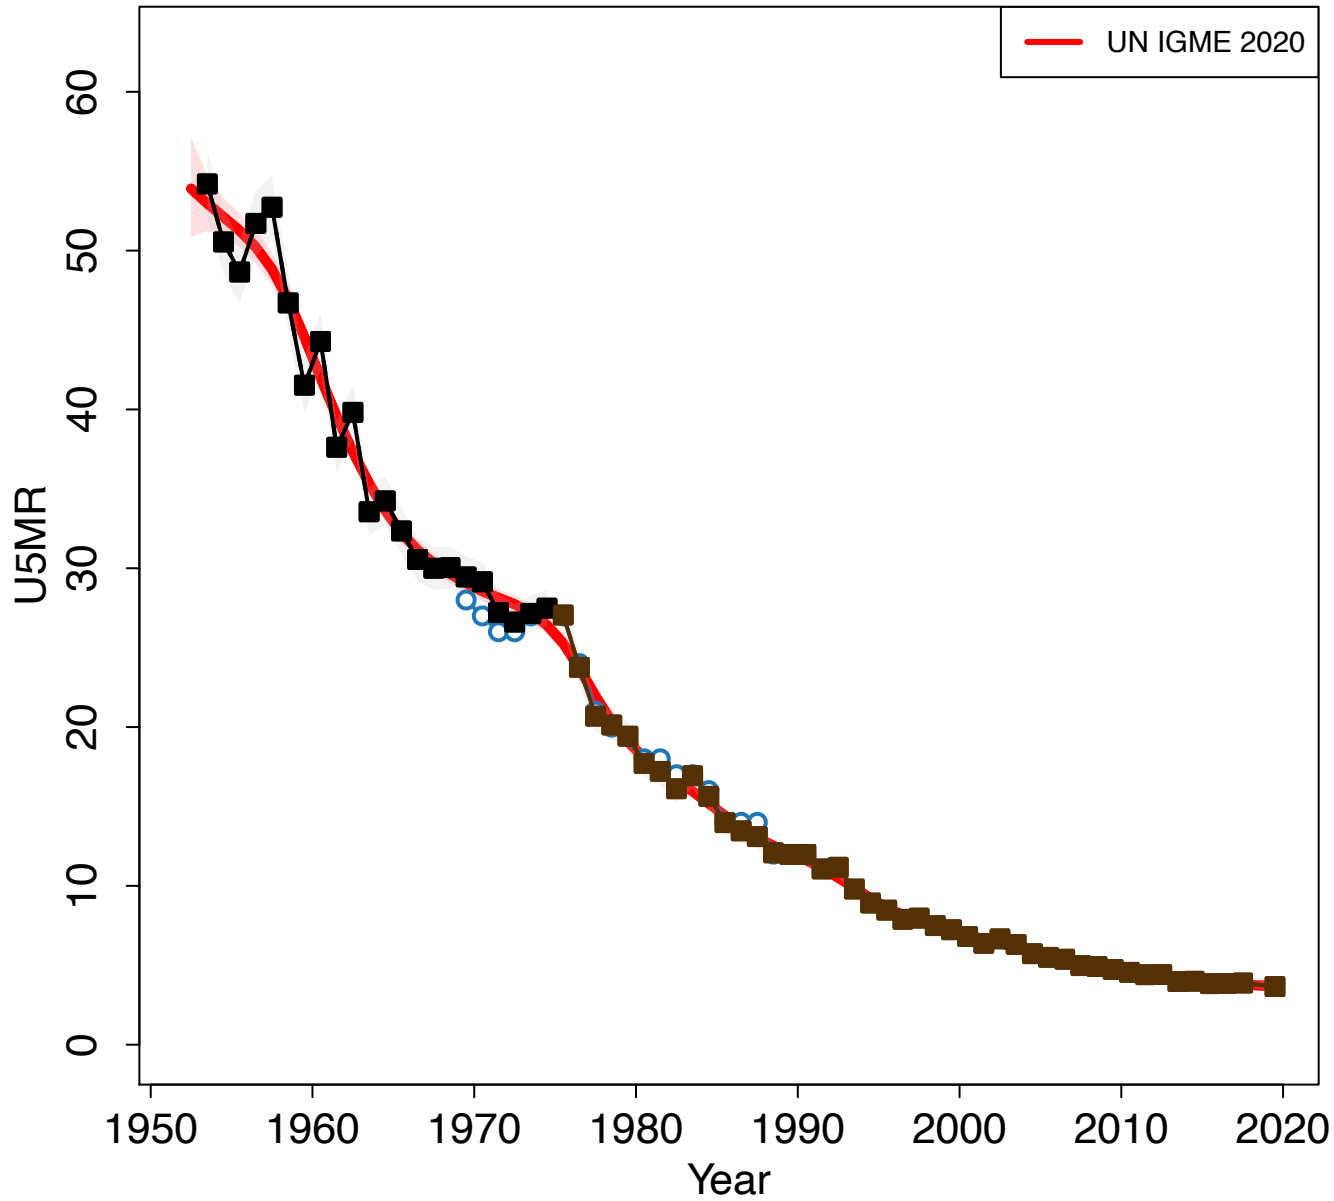

### Zoomed in

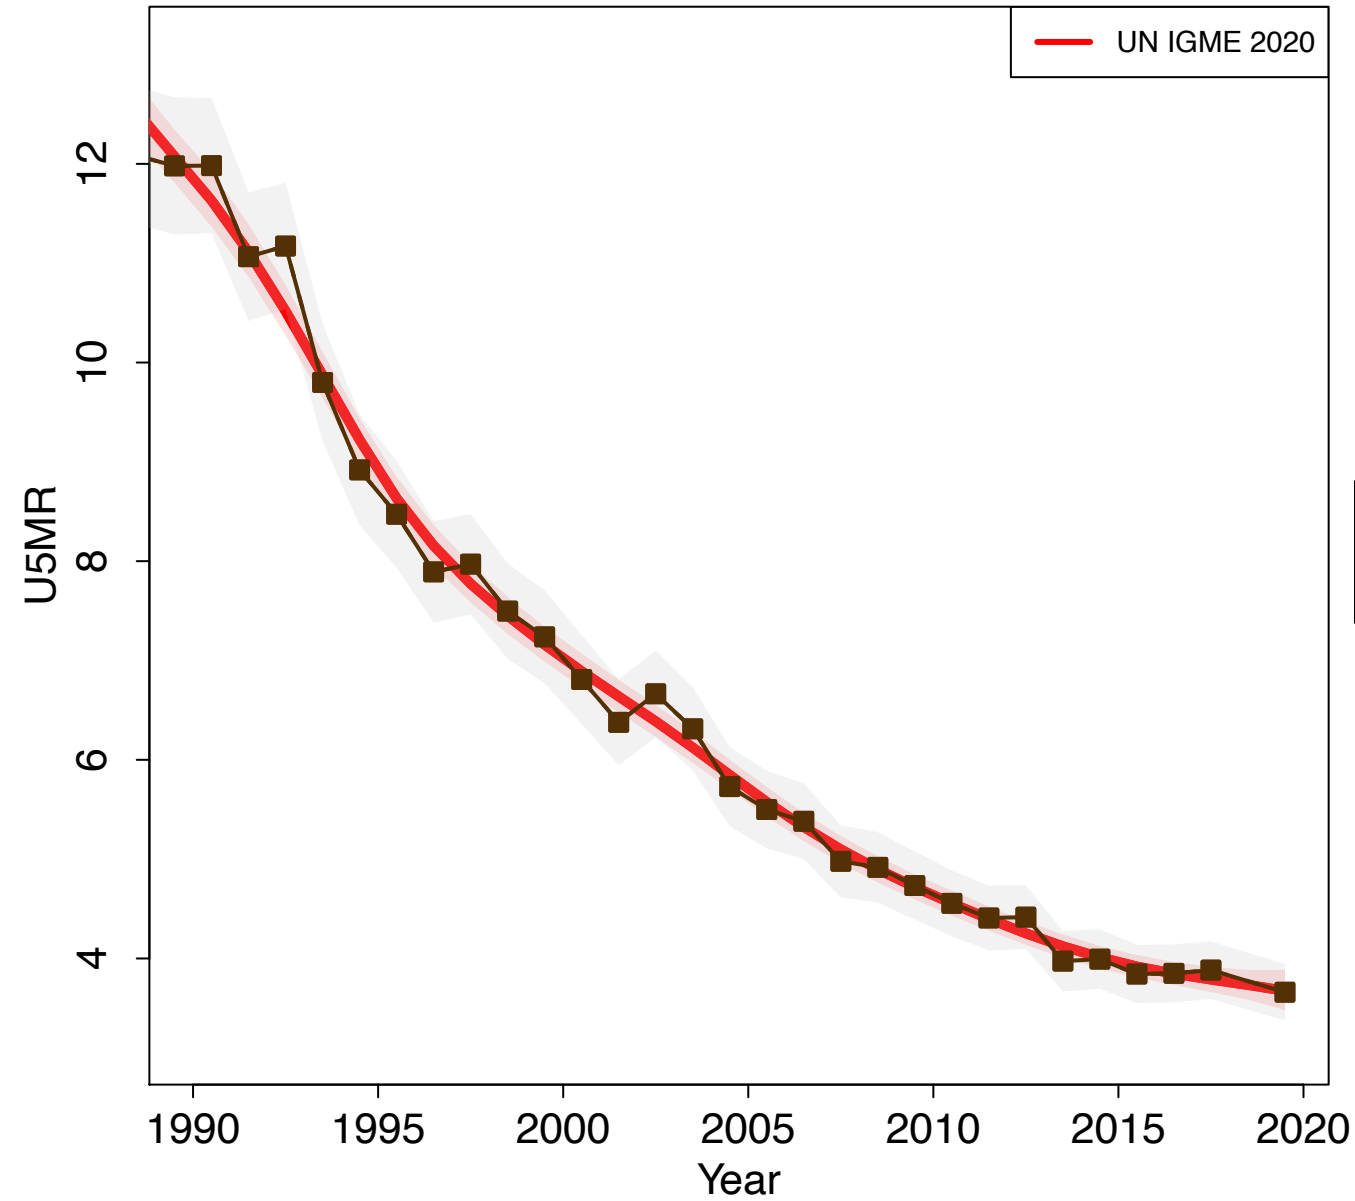

Italy

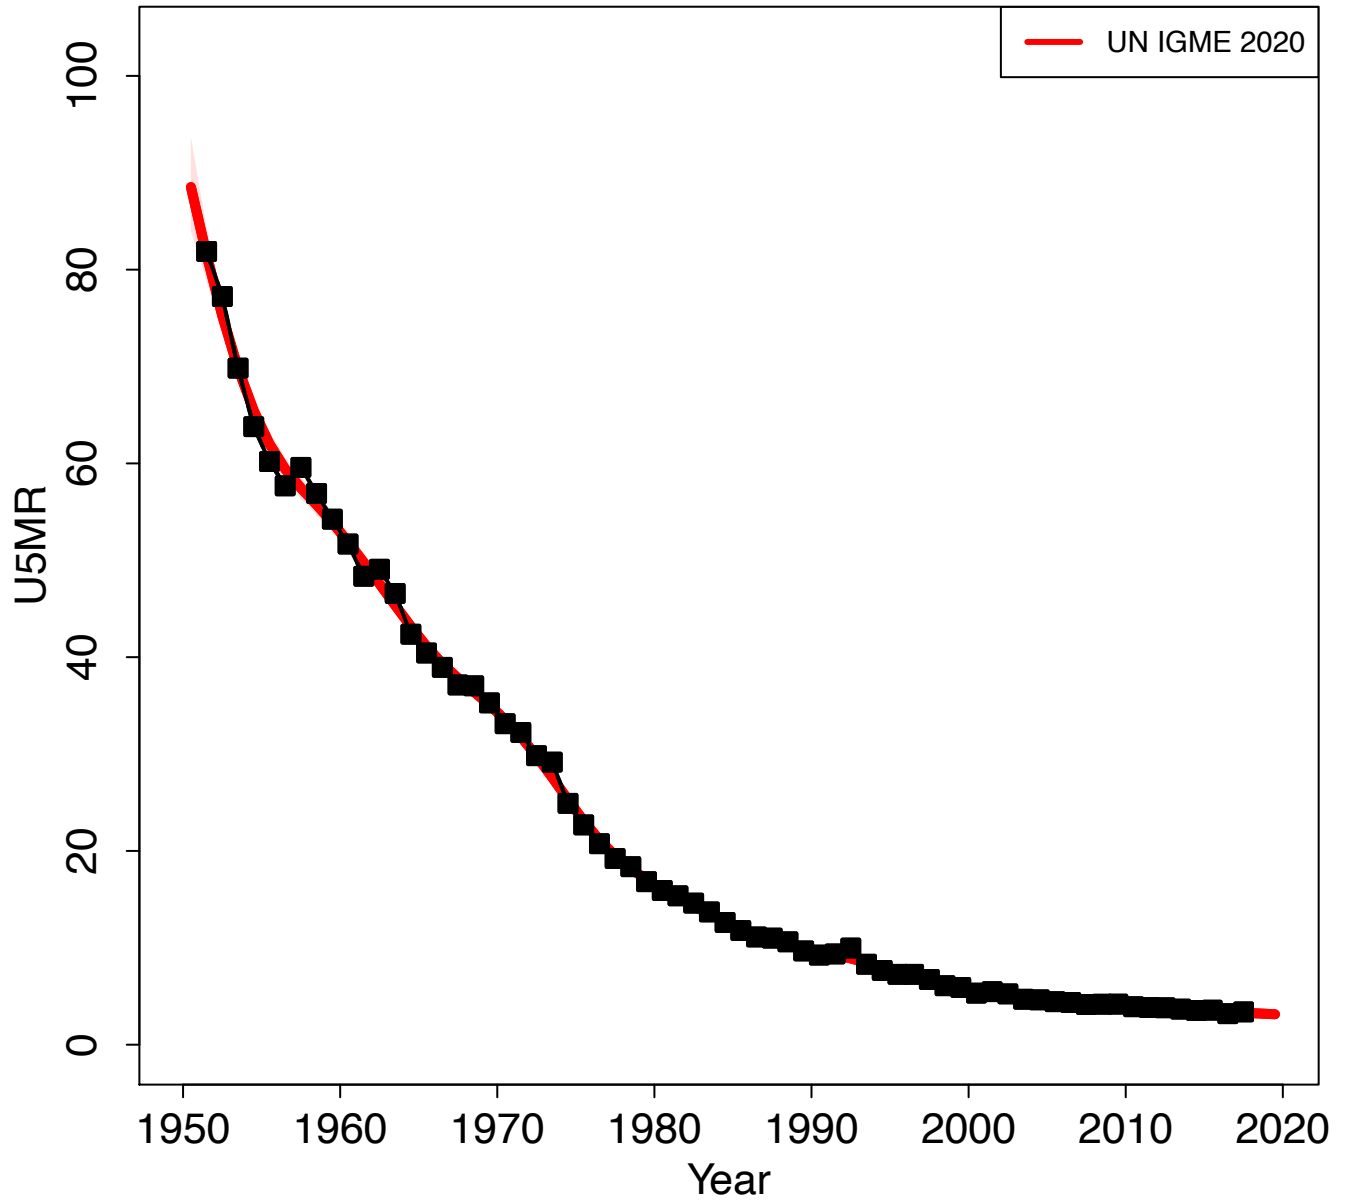

Zoomed in

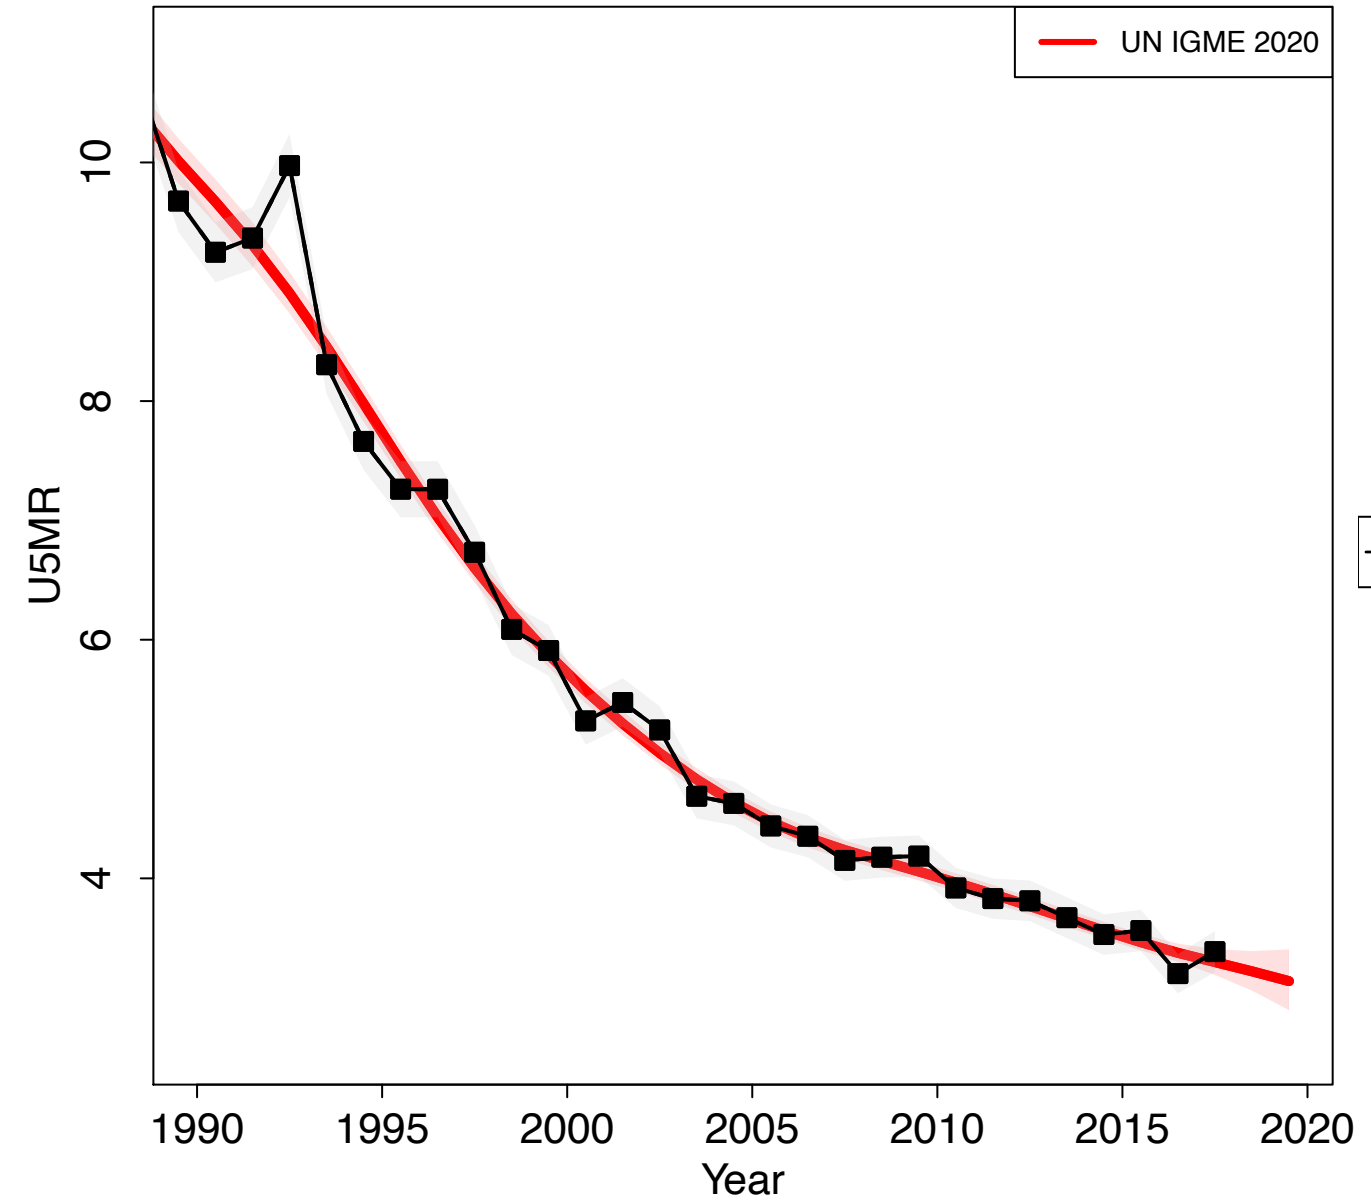

### Jamaica

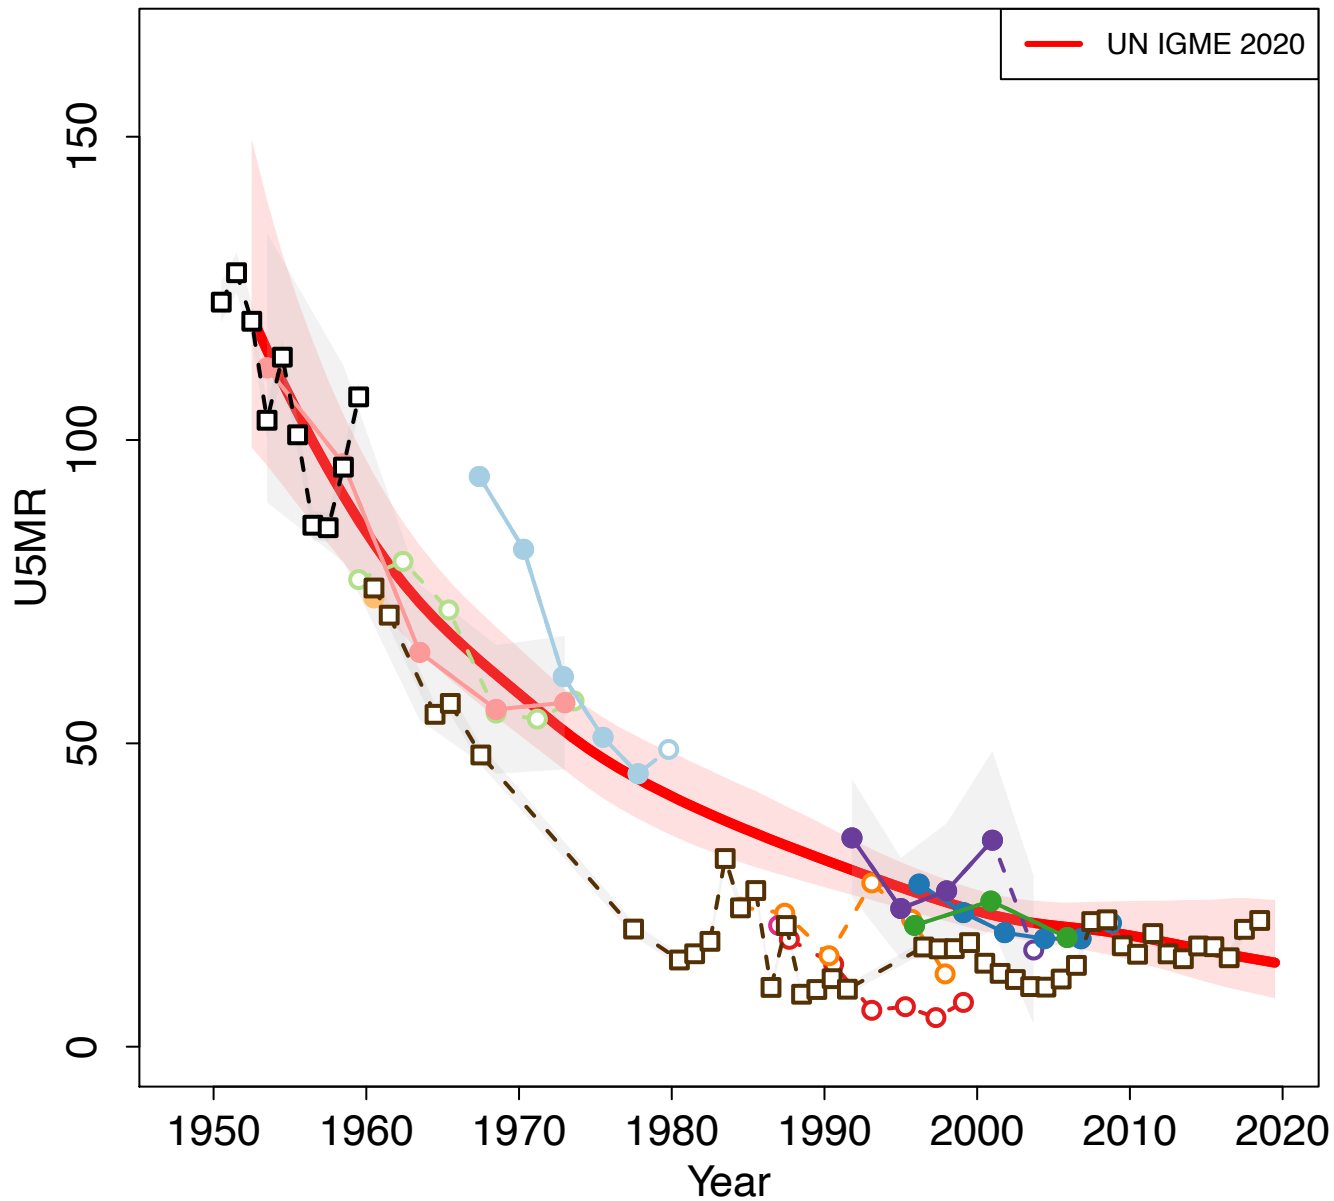

### Zoomed in

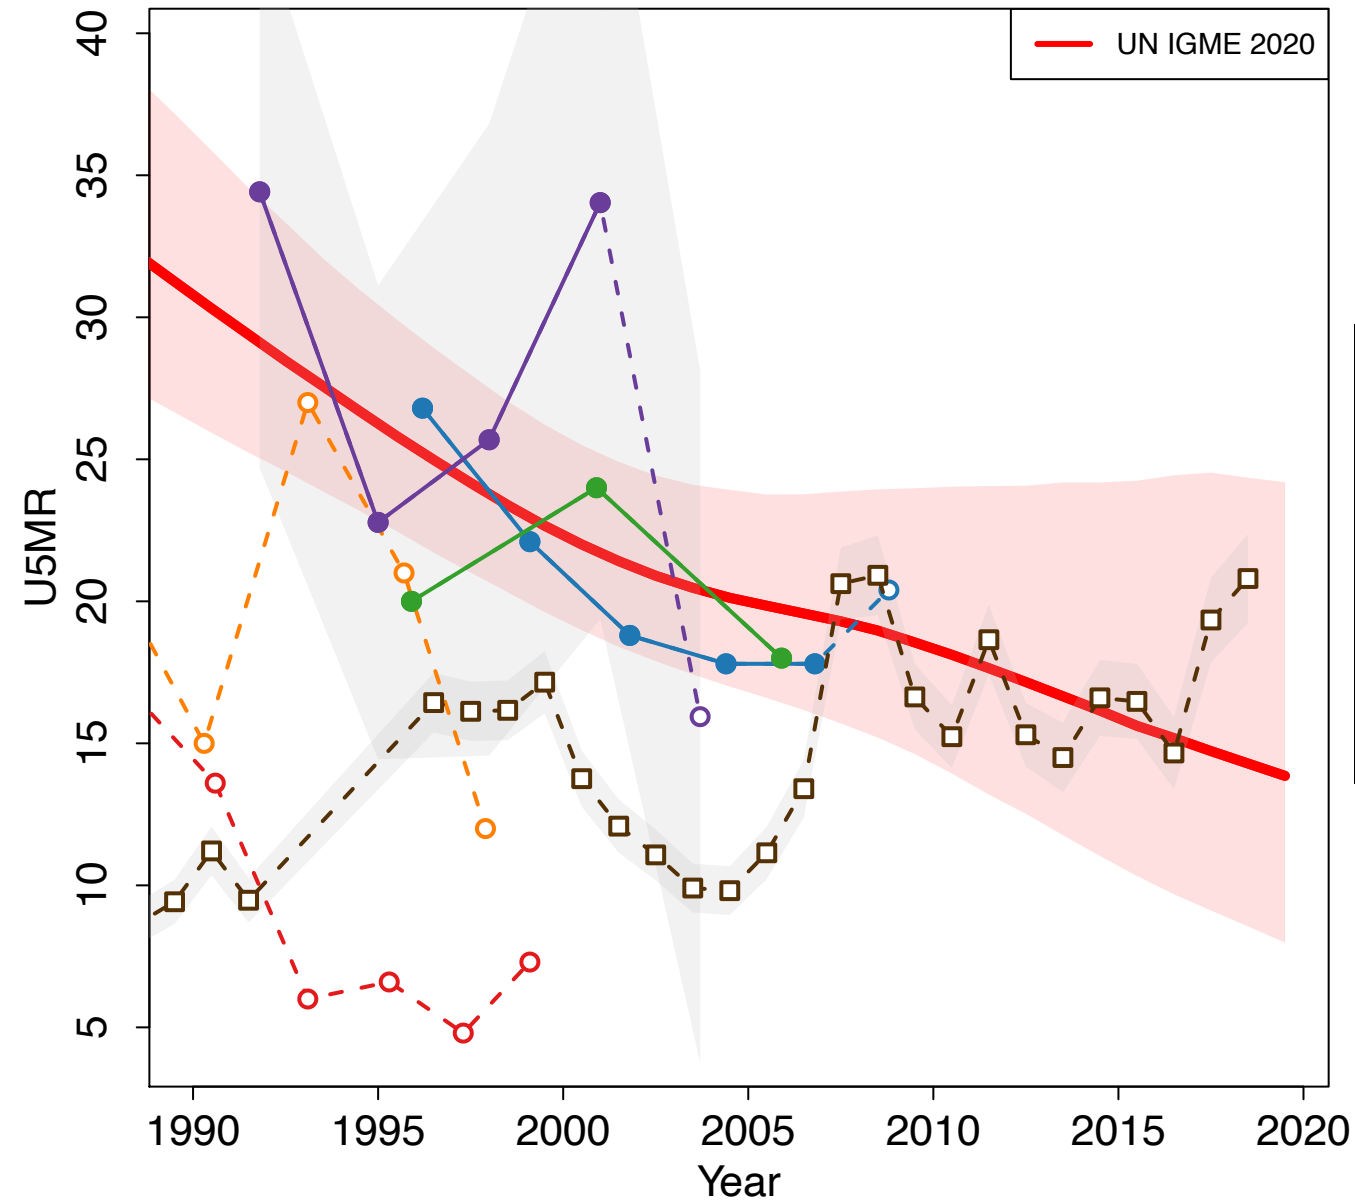

- National Life Tables 1960 (Others Life Table)
- World Fertility Survey 1975–1976 (Other DHS Direct)
- Jamaica Fertility Survey 1975–1976 (Other DHS Indirect)
- Census 1982 (Census Indirect)
- Contraceptive Prevalence Survey 1989 (Others Direct)
- Multiple Indicator Cluster Survey 2000 (Others Indirect)
- Census 2001 (Census Indirect)
- Multiple Indicator Cluster Survey 2005 (MICS Indirect)
- Reproductive Health Survey 2008–2009 (Others Direct)
- Census 2011 (Census Indirect)
- VR WHO
- VR UNPD Demographic Yearbook Data 2020 version

### Japan

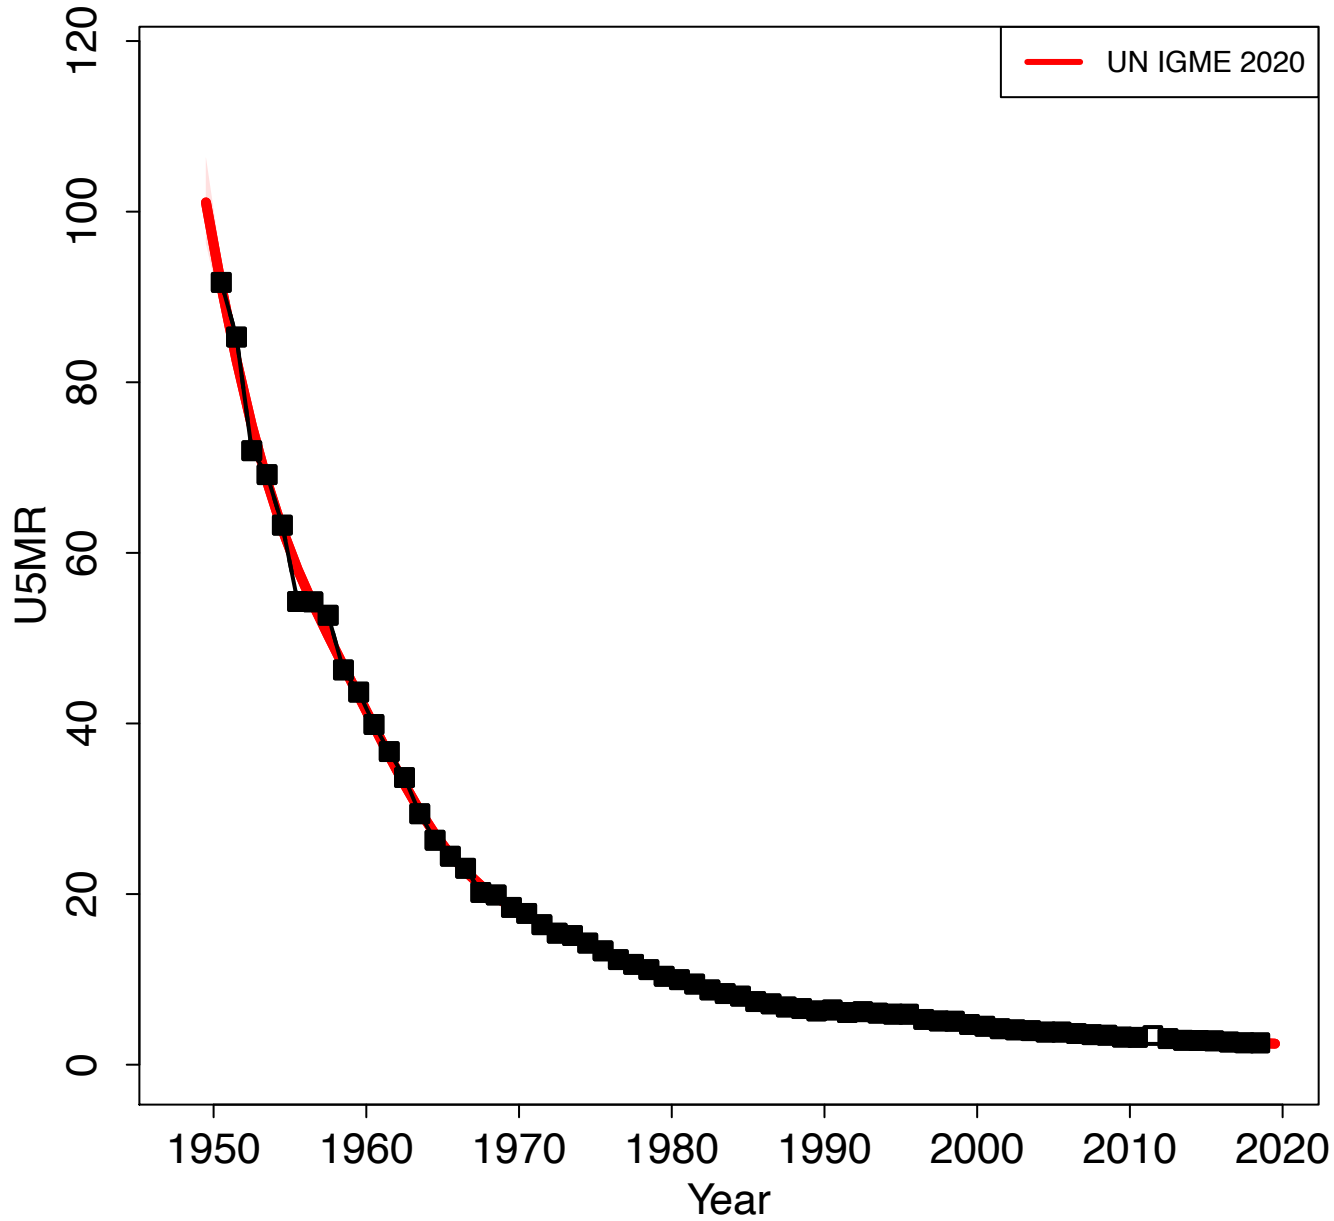

### Zoomed in

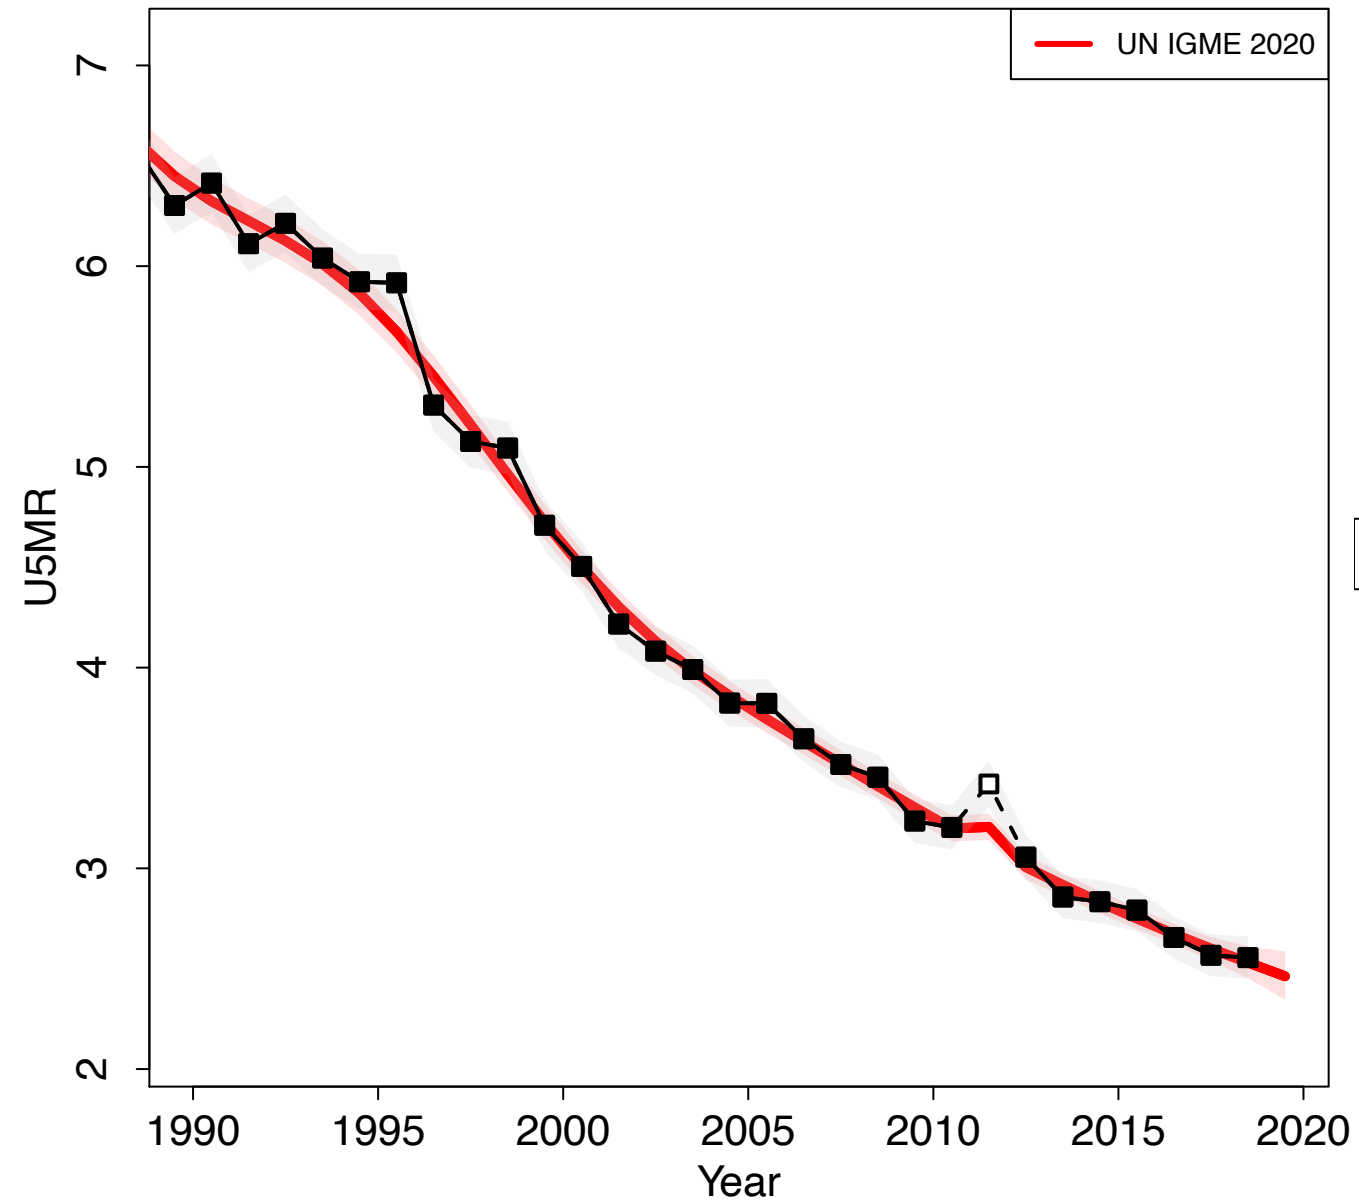

### Jordan

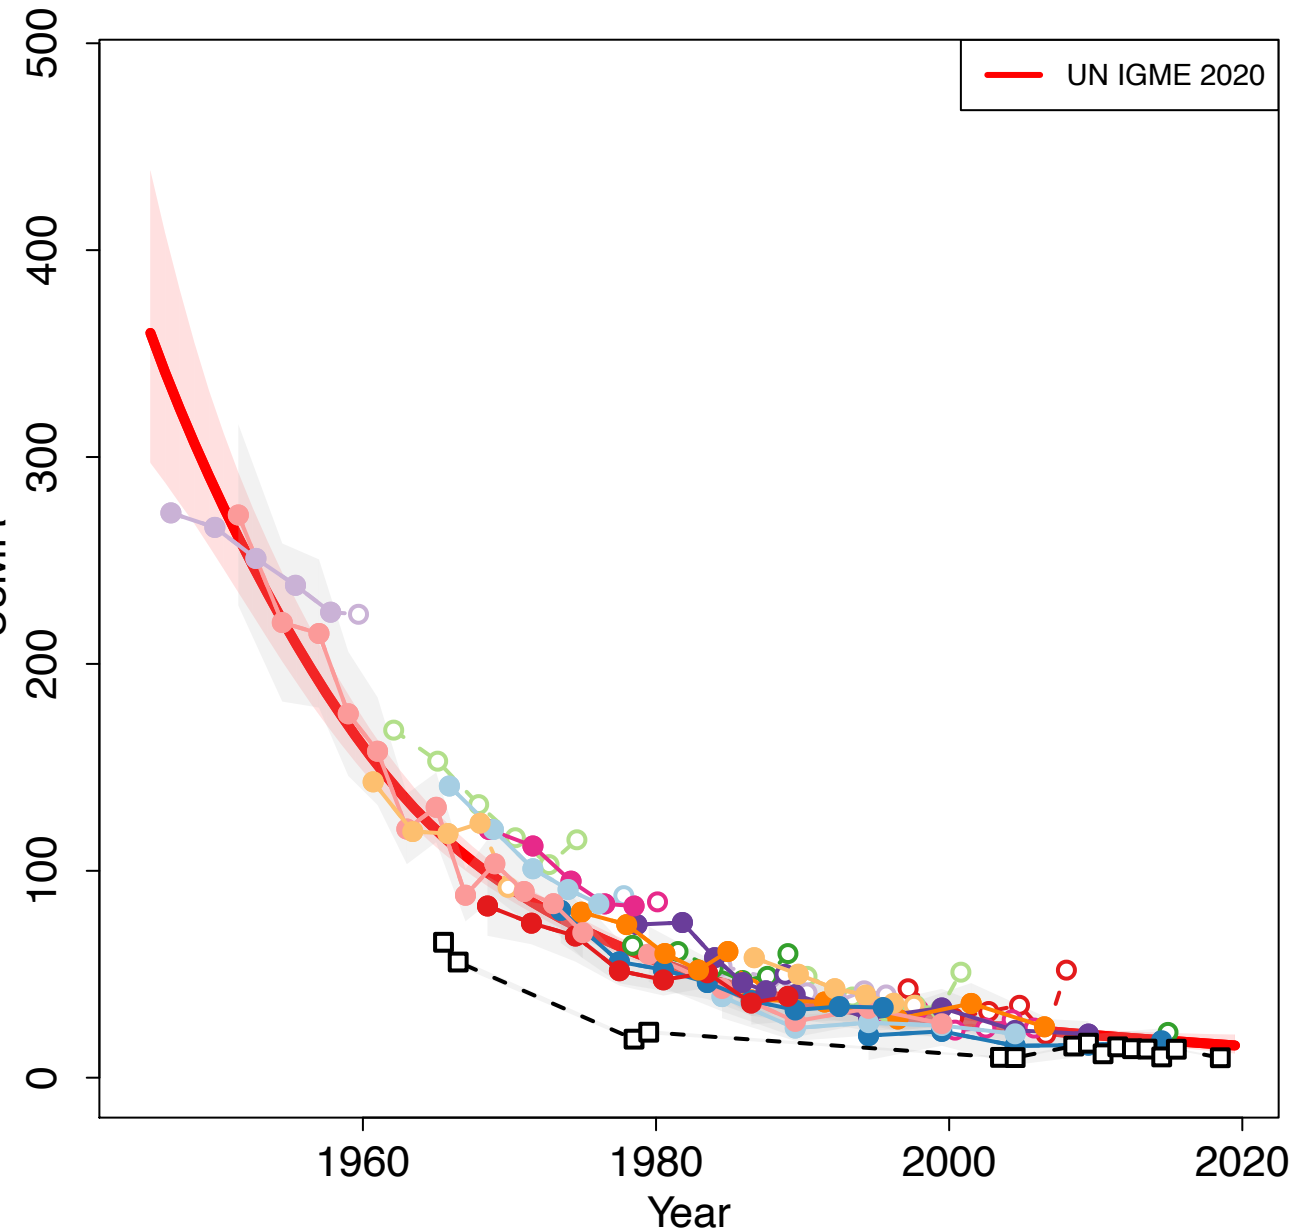

### Zoomed in

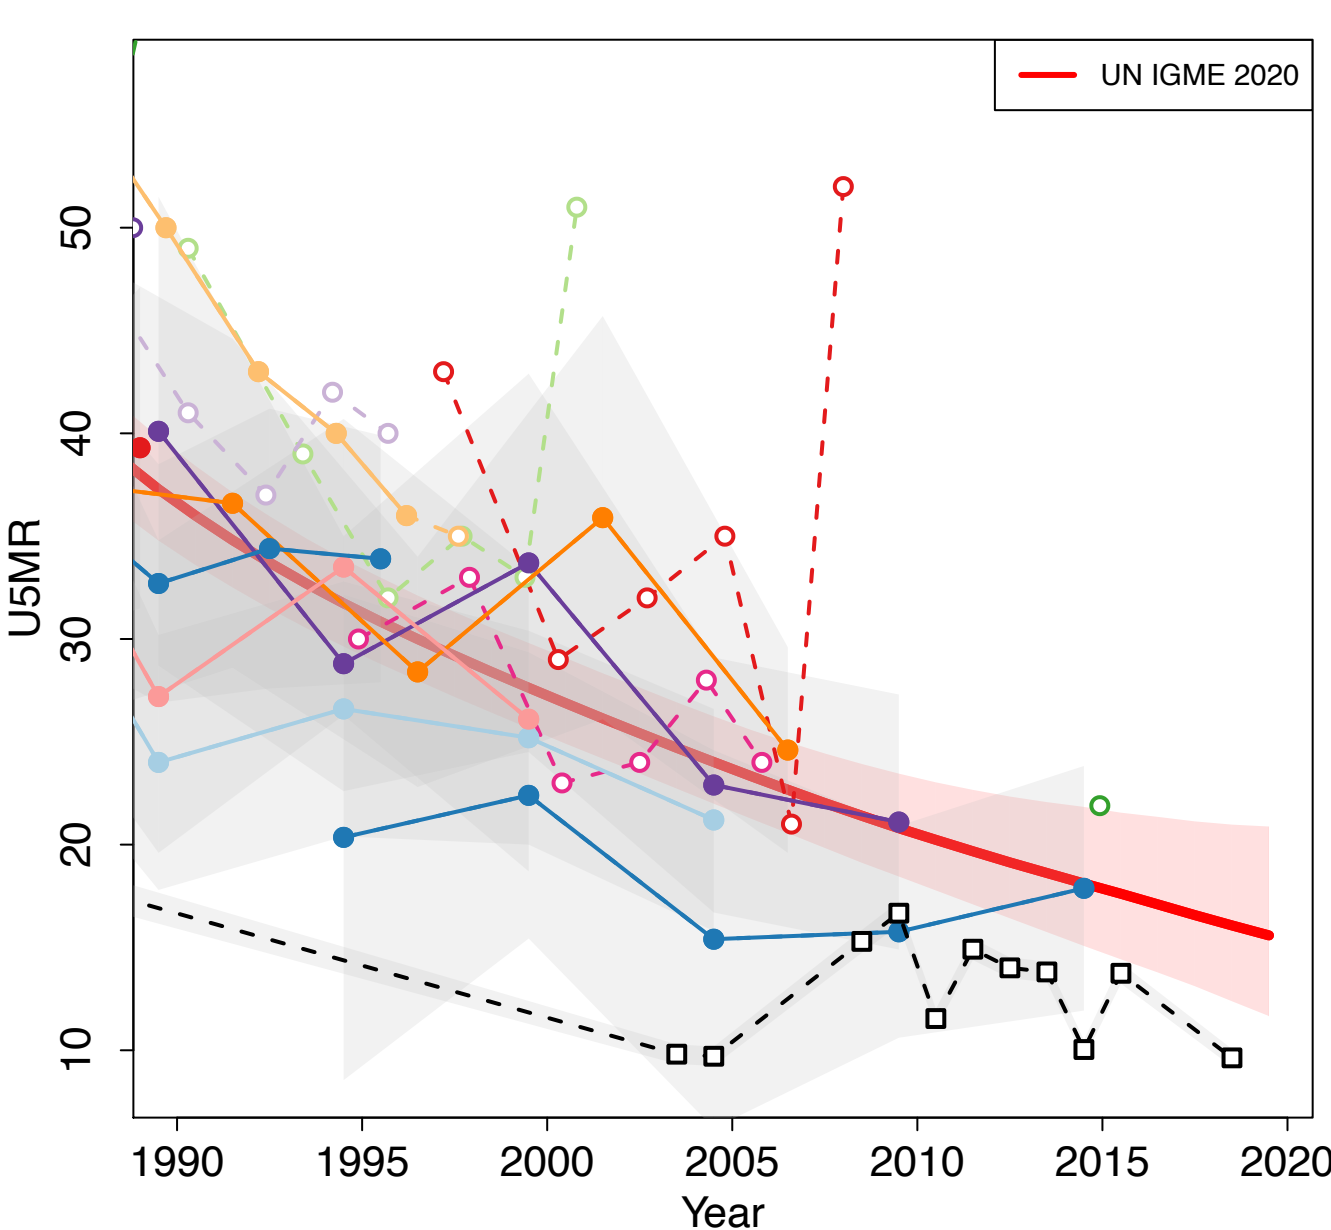

- Census 1961 (Census Indirect)
- Jordan Fertility Survey 1972 (Others Indirect)
- World Fertility Survey 1976 (Other DHS Direct)
- World Fertility Survey 1976 (Other DHS Indirect)
- Census 1979 (Census Indirect)
- Jordan Demographic Survey 1981 (Others Indirect)
- EPI/CDD and Child Mortality Survey 1988 (Others Indirect)
- Demographic and Health Survey 1990 (DHS Direct)
- EPI/CDD and Child Mortality Survey 1990 (Others Indirect)
- Demographic and Health Survey 1990 (DHS Indirect)
- Demographic and Health Survey 1997 (DHS Direct)
- Demographic and Health Survey 1997 (DHS Indirect)
- Annual Fertility Survey 1999 (Others Indirect)
- Demographic and Health Survey 2002 (DHS Direct)
- Demographic and Health Survey 2002 (DHS Indirect)
- Demographic and Health Survey 2007 (DHS Direct)
- Demographic and Health Survey 2007 (DHS Indirect)
- Demographic and Health Survey 2009 (Other DHS Direct)
- Demographic and Health Survey 2009 (Other DHS Indirect)
- Demographic and Health Survey 2012 (DHS Direct)
- Census 2015 (Others Household Deaths)
- Demographic and Health Survey 2017 (DHS Direct)
- VR WHO



### Kazakhstan

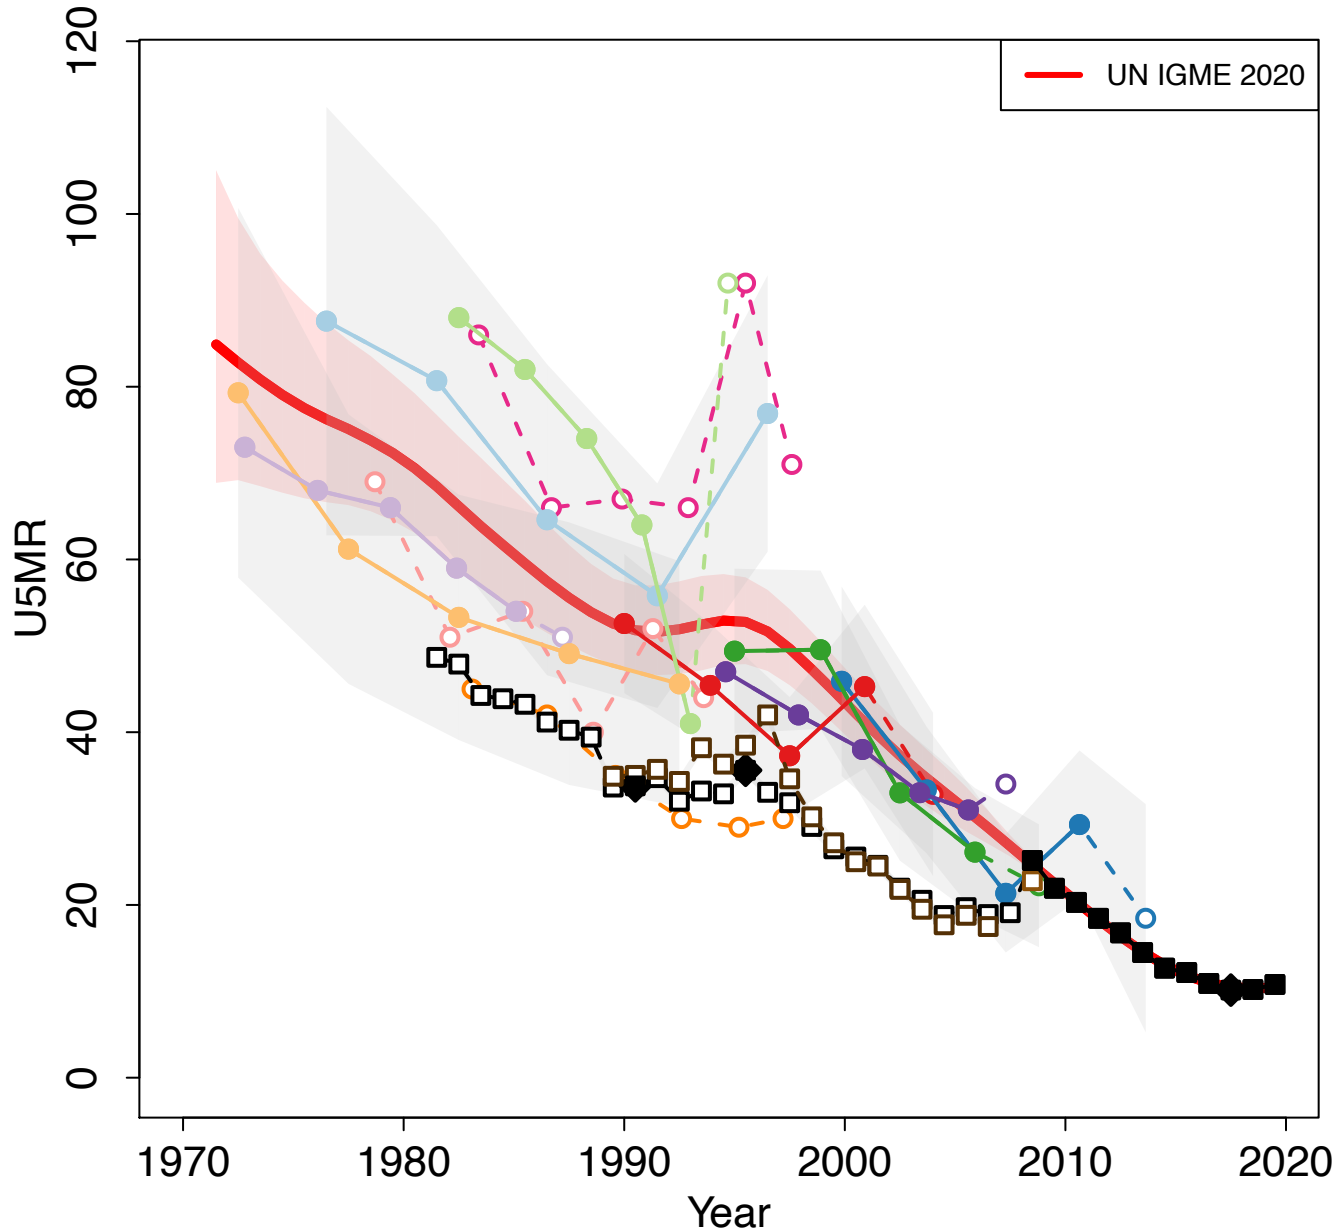

### Zoomed in

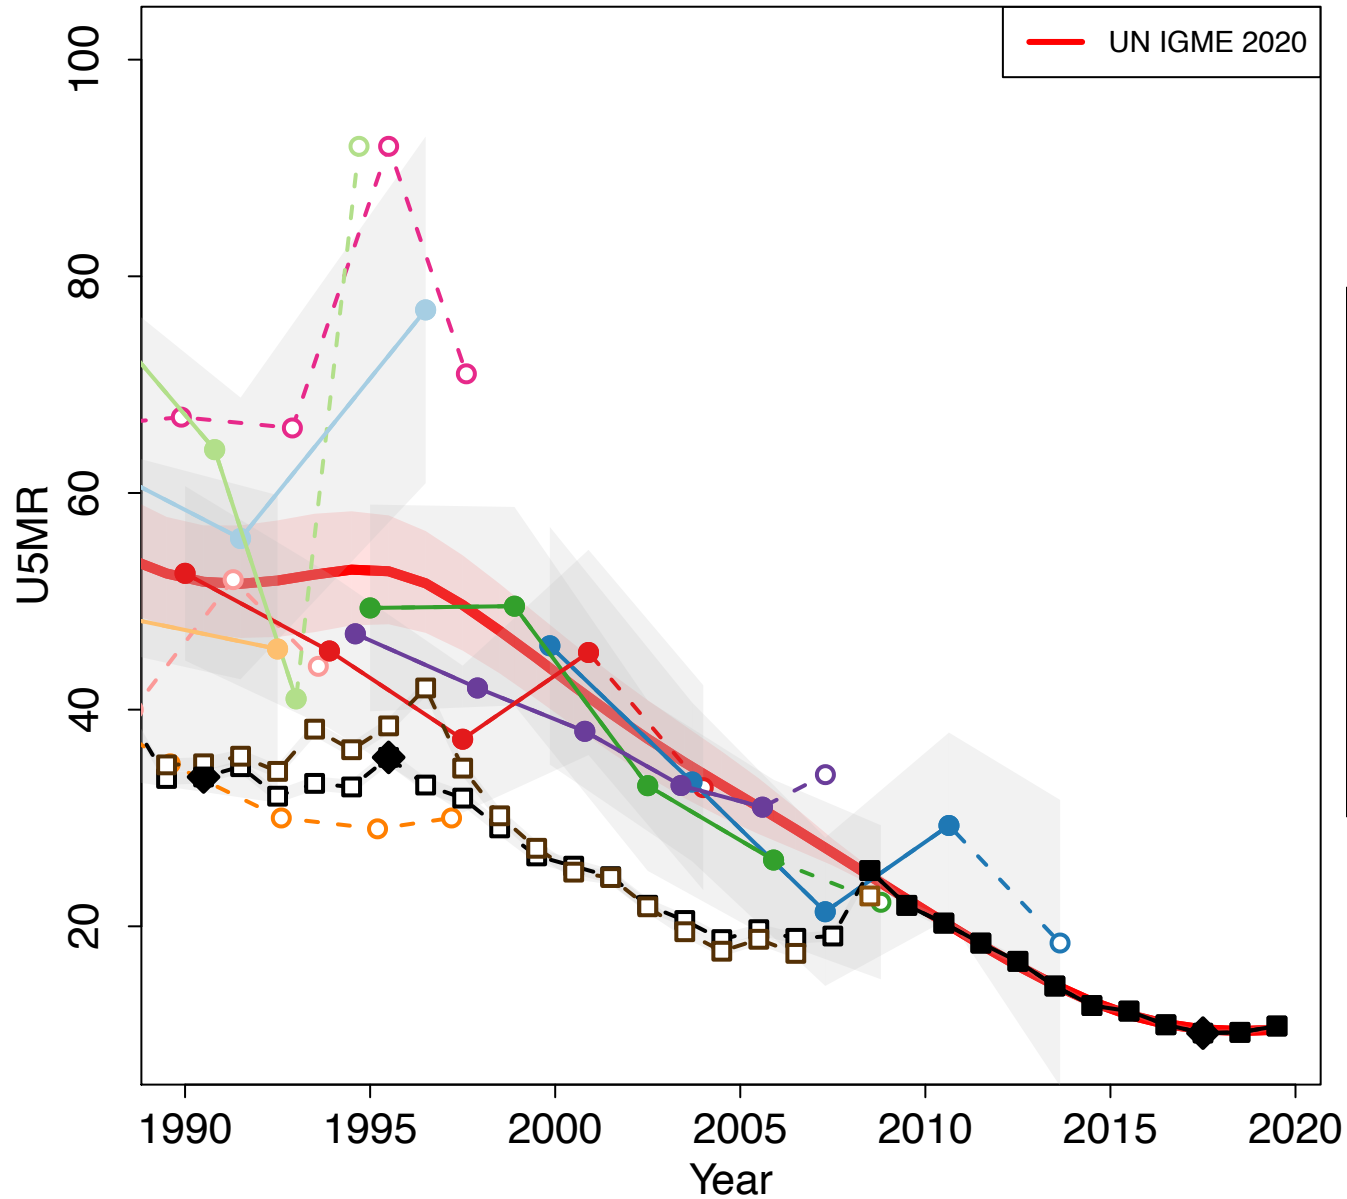

- Census 1989 (Census Indirect)
- Demographic and Health Survey 1995 (DHS Direct)
- Demographic and Health Survey 1995 (DHS Indirect)
- Isms 1996 (Others Indirect)
- Demographic and Health Survey 1999 (DHS Direct)
- Demographic and Health Survey 1999 (DHS Indirect)
- Census 1999 (Census Indirect)
- Multiple Indicator Cluster Survey 2006 (MICS Indirect)
- Census 2009 (Census Indirect)
- Multiple Indicator Cluster Survey 2010–2011 (MICS Indirect)
- Multiple Indicator Cluster Survey 2015 (MICS Indirect)
- VR Vital Registration Data from The Agency of Statistics of Kazakhstan
- VR Transmonee Vital Registration Data 2008 version
- VR WHO

# Kenya

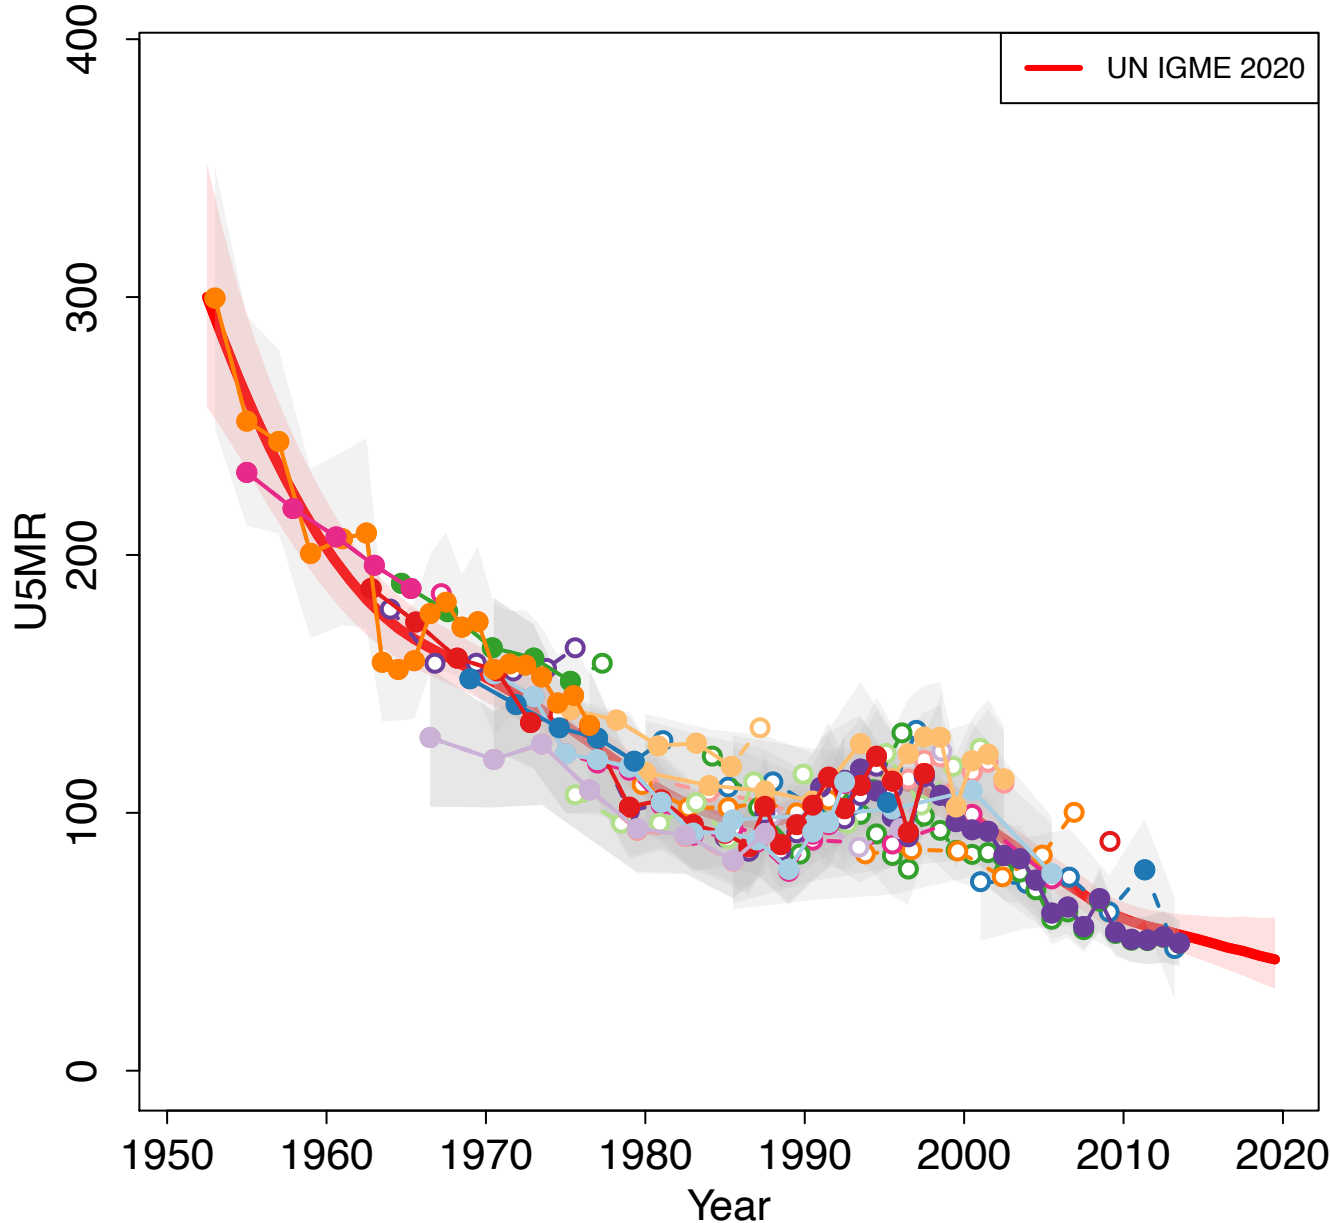

# Zoomed in

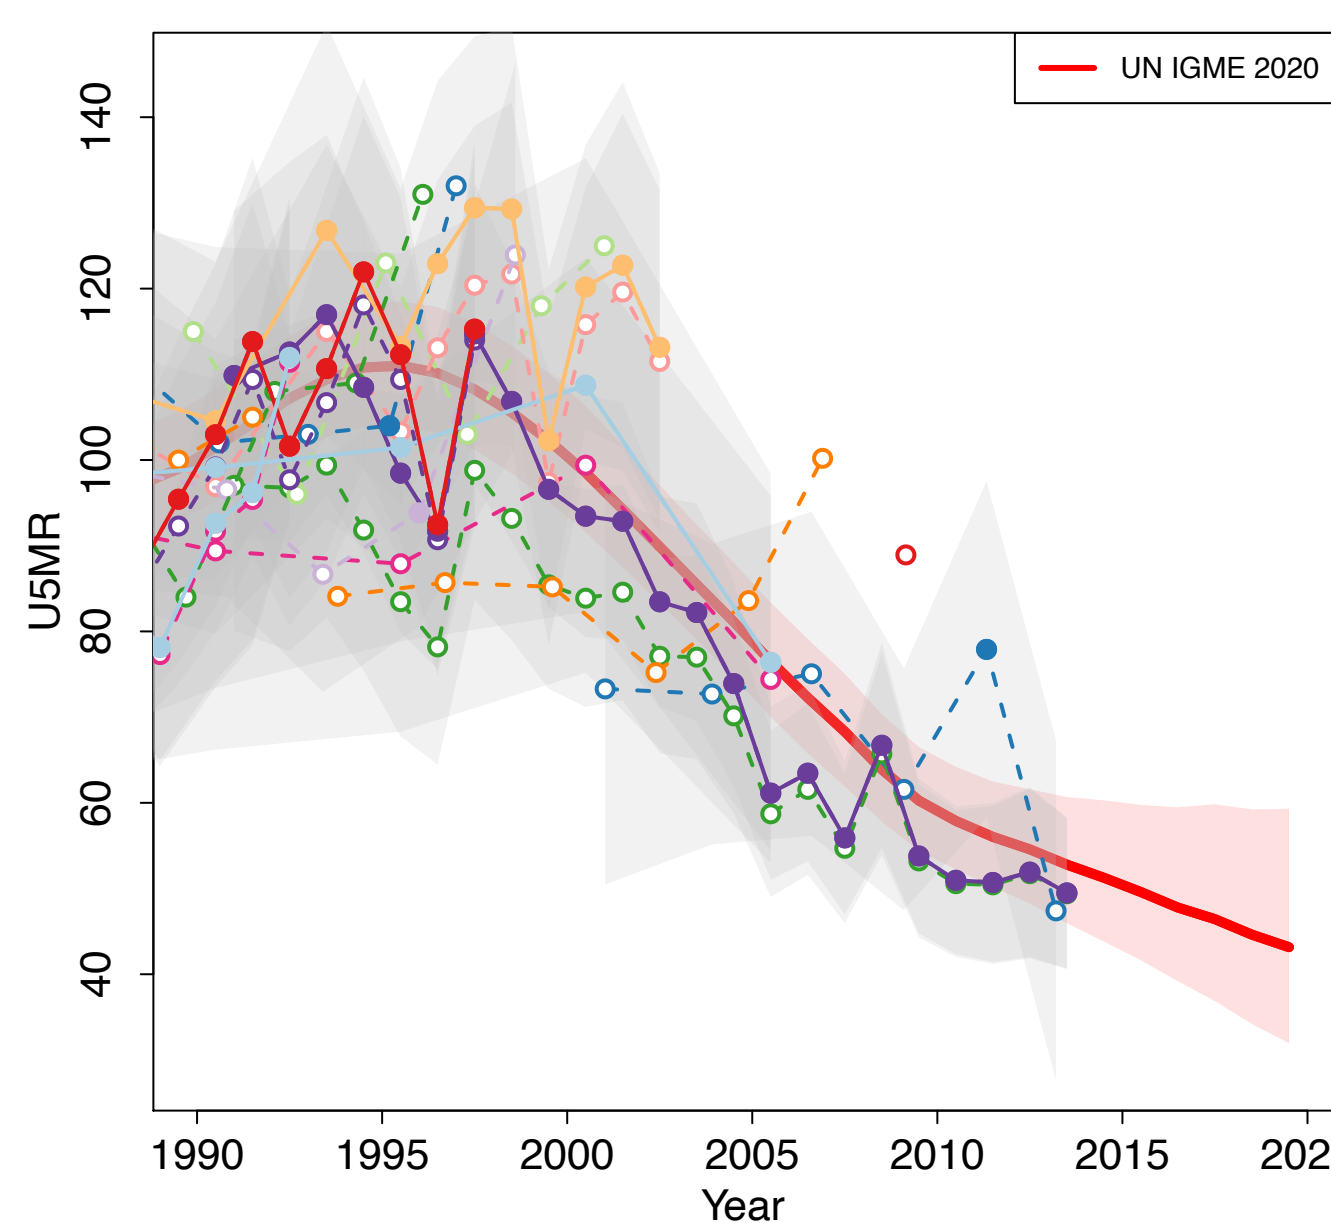

- Census 1969 (Census Indirect)
- World Fertility Survey 1977–1978 (Other DHS Direct)
- Demographic Survey 1977 (Others Indirect)
- World Fertility Survey 1977–1978 (Other DHS Indirect)
- Census 1979 (Census Indirect)
- Demographic Survey 1983 (Others Indirect)
- Demographic and Health Survey (MM adjusted) 1989 (DHS Direct)
- Census 1989 (Census Indirect)
- Demographic and Health Survey 1989 (DHS Direct)
- Demographic and Health Survey 1989 (DHS Indirect)
- Demographic and Health Survey (MM adjusted) 1993 (DHS Direct)
- Demographic and Health Survey 1993 (DHS Direct)
- Demographic and Health Survey 1993 (DHS Indirect)
- Demographic and Health Survey (MM adjusted) 1998 (DHS Direct)
- Demographic and Health Survey 1998 (DHS Direct)
- Demographic and Health Survey 1998 (DHS Indirect)
- Census 1999 (Census Indirect)
- Multiple Indicator Cluster Survey 2000 (MICS Indirect)
- Demographic and Health Survey (MM adjusted) 2003 (DHS Direct)
- Demographic and Health Survey 2003 (DHS Direct)
- Demographic and Health Survey 2003 (DHS Indirect)
- Demographic and Health Survey (MM adjusted) 2008–2009 (DHS Direct)
- Demographic and Health Survey 2008–2009 (DHS Direct)
- Demographic and Health Survey 2008–2009 (DHS Indirect)
- Census 2009 (Others Household Deaths)
- Demographic and Health Survey (MM adjusted) 2014 (DHS Direct)
- Demographic and Health Survey 2014 (DHS Direct)
- Malaria Indicator Survey 2015 (Other DHS Indirect)

# Kiribati

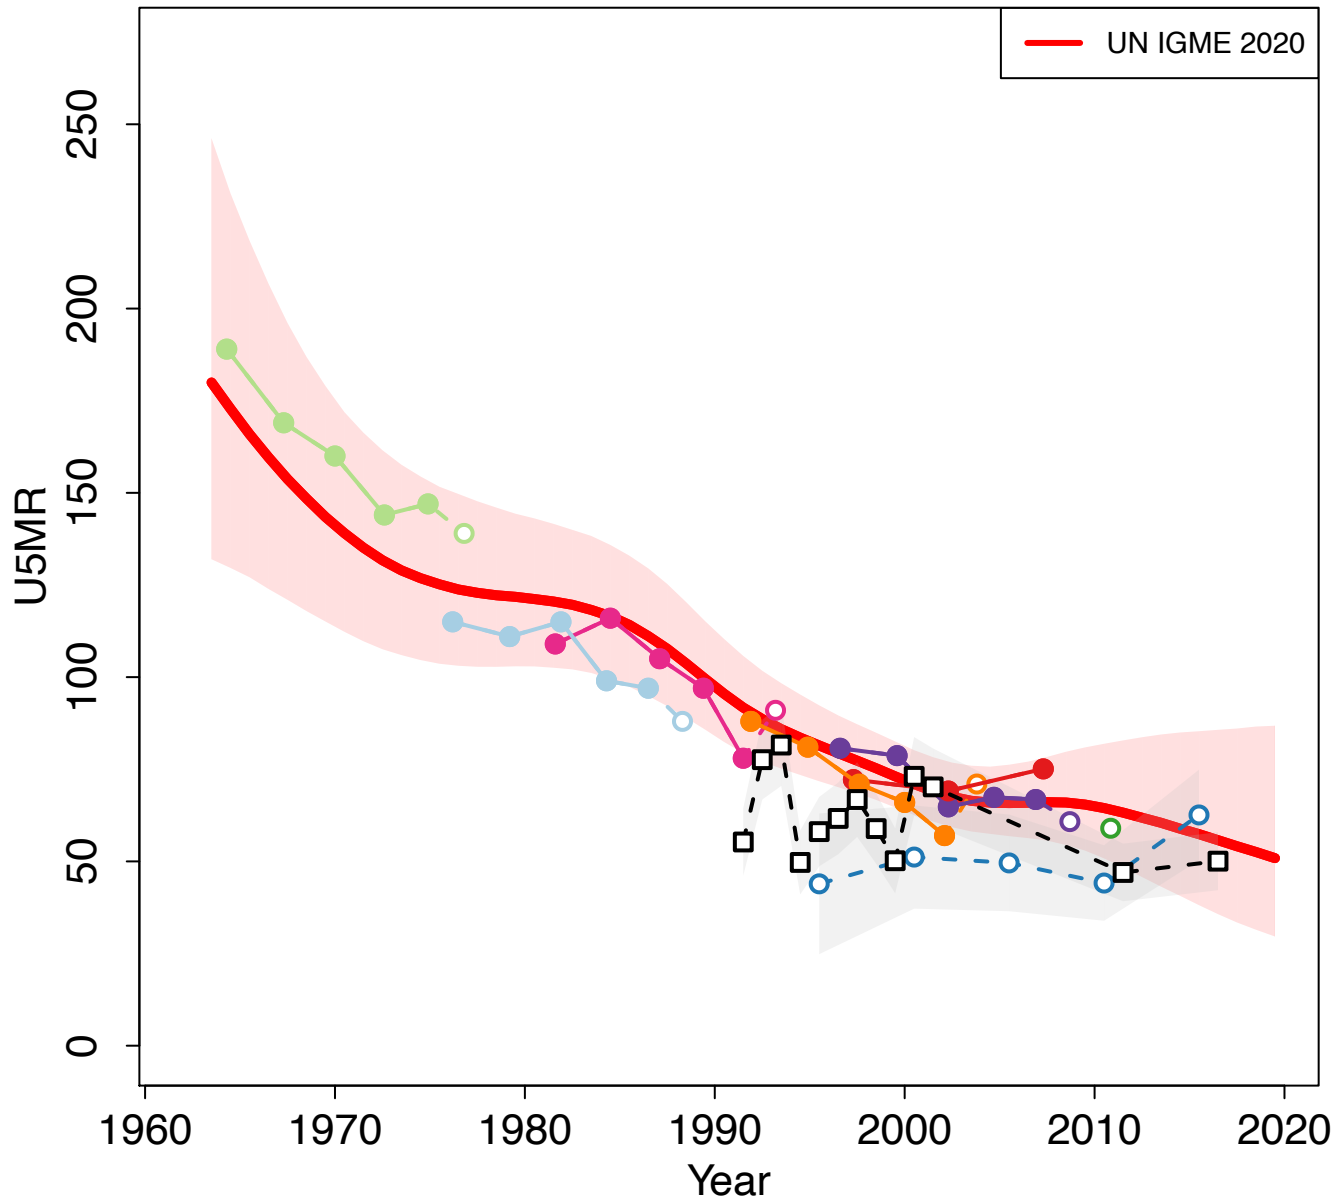

# Zoomed in

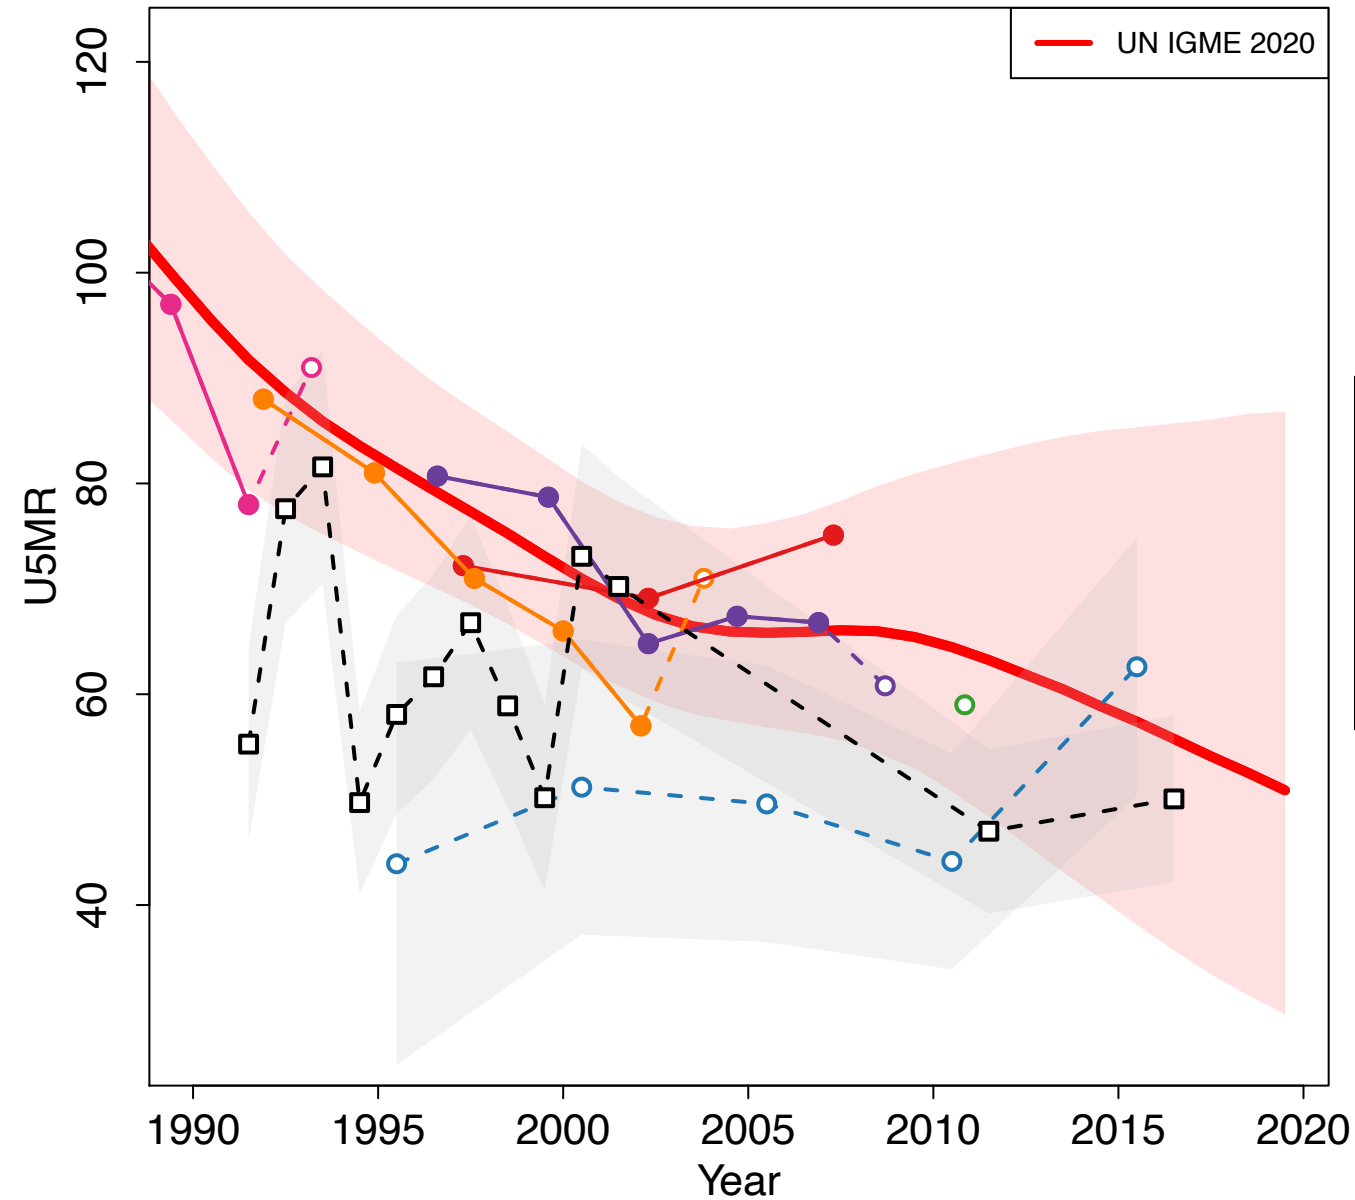

- Census 1978 (Census Indirect)
- Census 1990 (Census Indirect)
- Census 1995 (Census Indirect)
- Census 2005 (Census Indirect)
- SPC Demographic and Health Survey 2009 (Other DHS Direct)
- Census 2010 (Census Indirect)
- Census 2010 (Others Household Deaths)
- Multiple Indicator Cluster Survey 2018–2019 (MICS Direct)
- VR WHO

### Democratic People's Republic of Korea

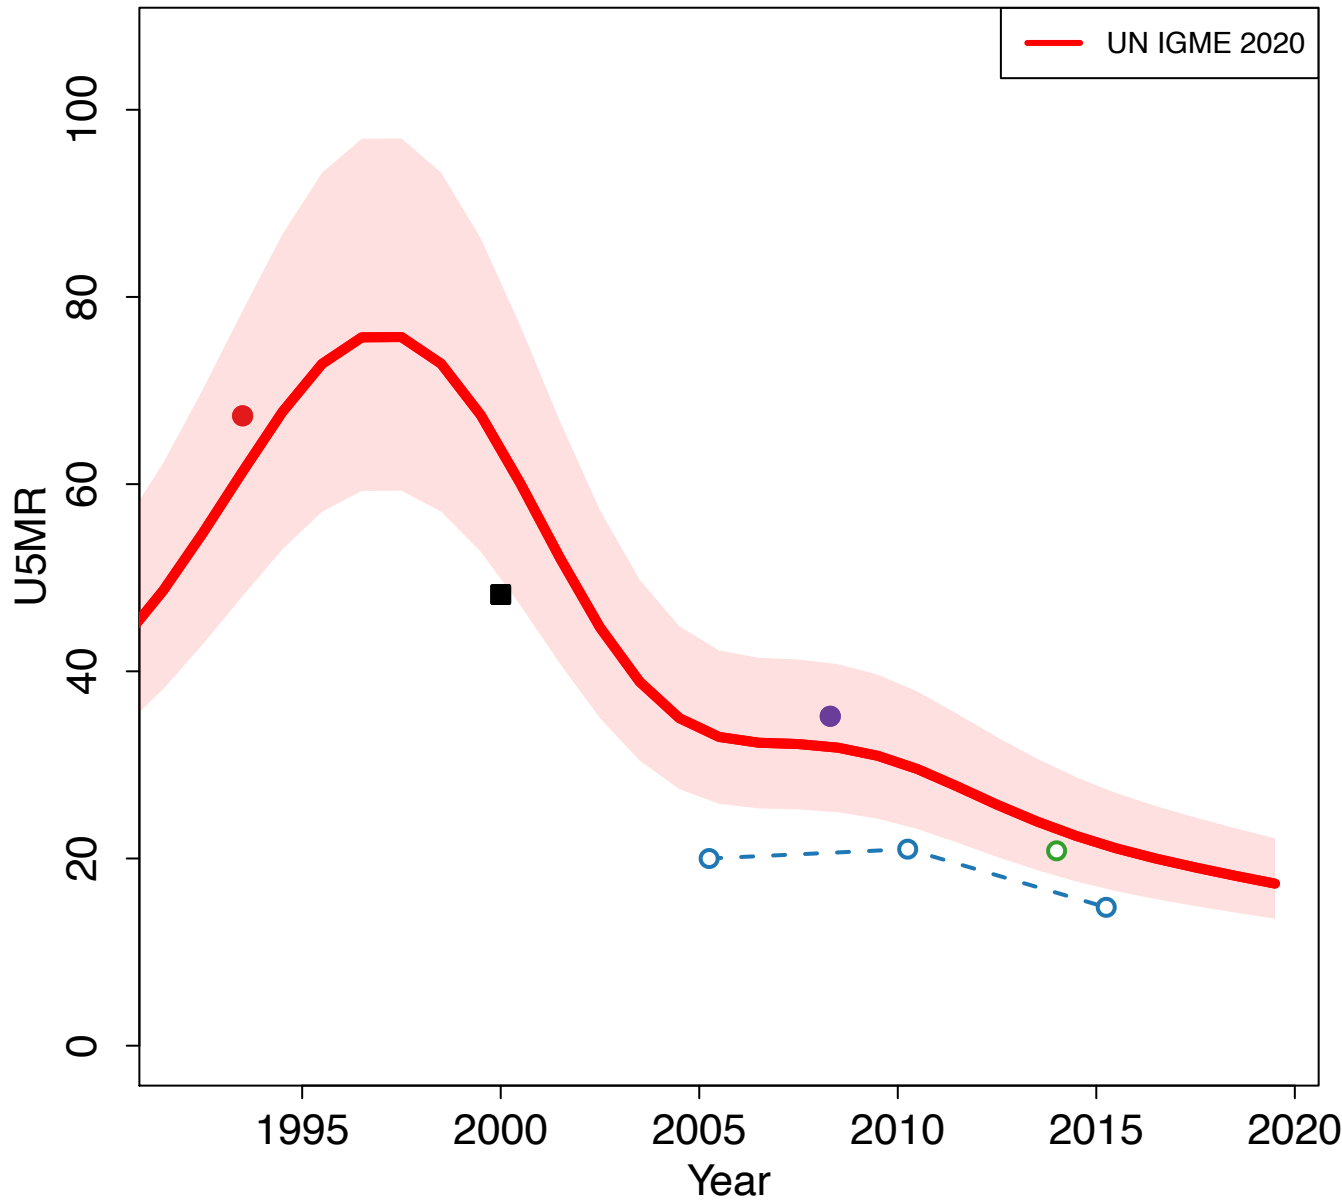

### Zoomed in

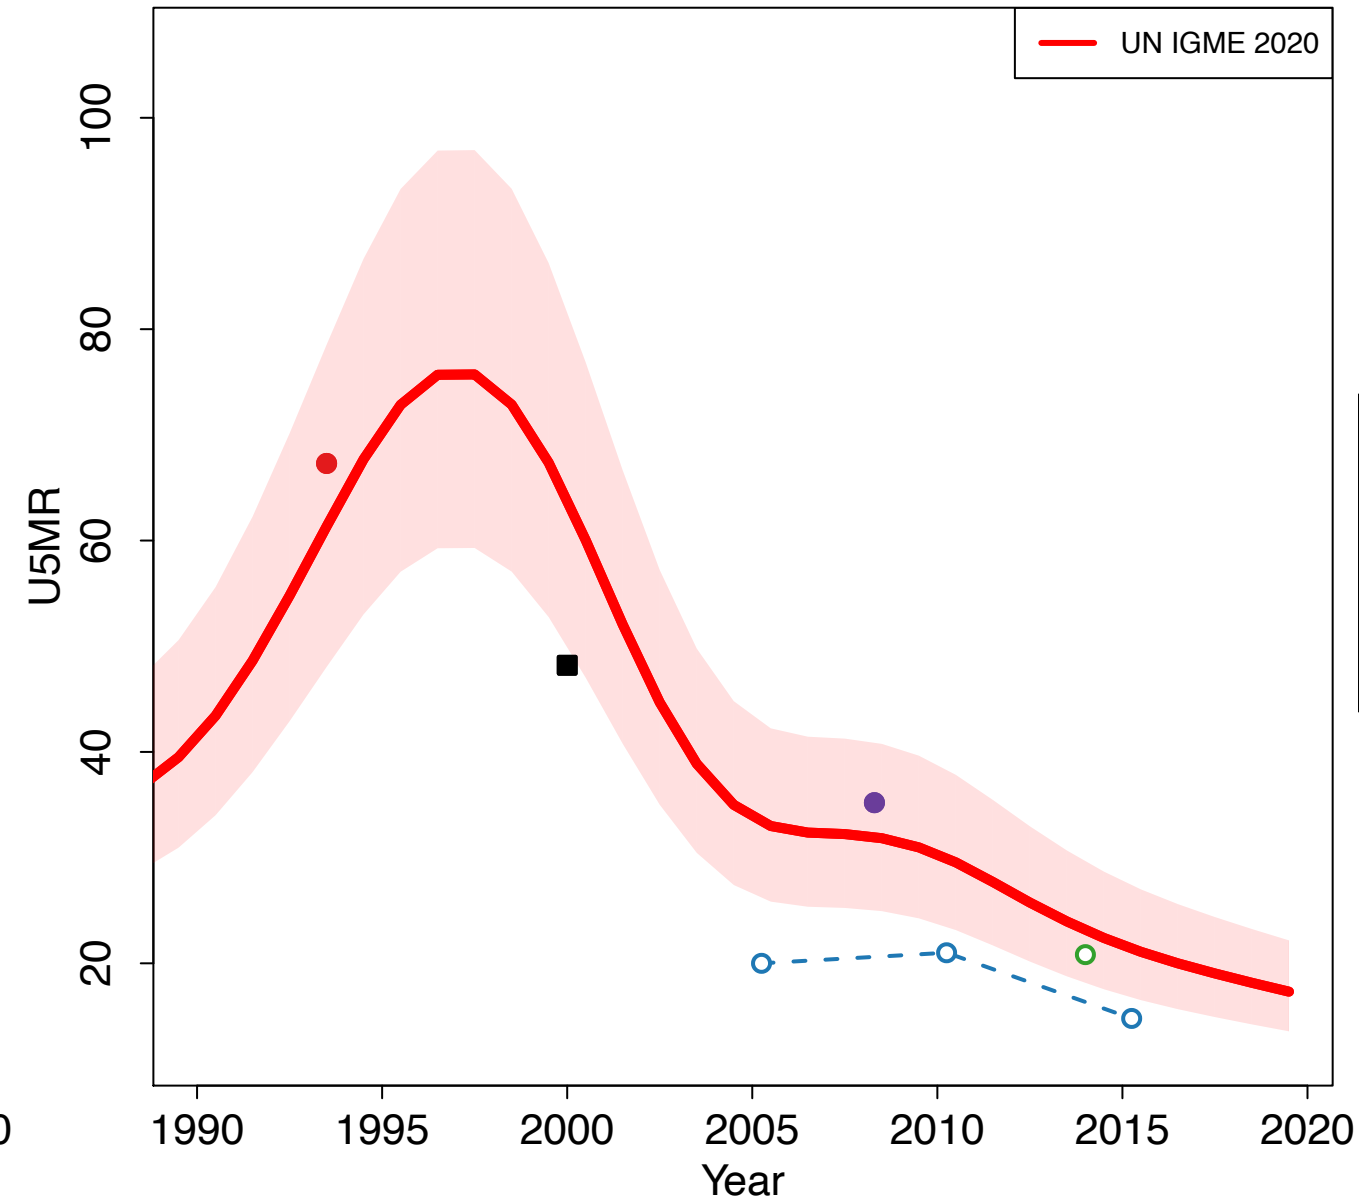

- UN IGME 2020
- Census (adjusted fro 1q0 and thus 5q0 based on 4q0 and south model life table) 1993 (Others Household Deaths)
- Census (adjusted 1q0 and thus 5q0 based on 4q1 and north model life table) 2008 (Others Household Deaths)
- Socio-economic, Demographic and Health Survey 2014 (Others Life Table)
- Multiple Indicator Cluster Survey 2017 (MICS Direct)
- VR Civil Registration data from Central Bureau of Statistics

# Republic of Korea

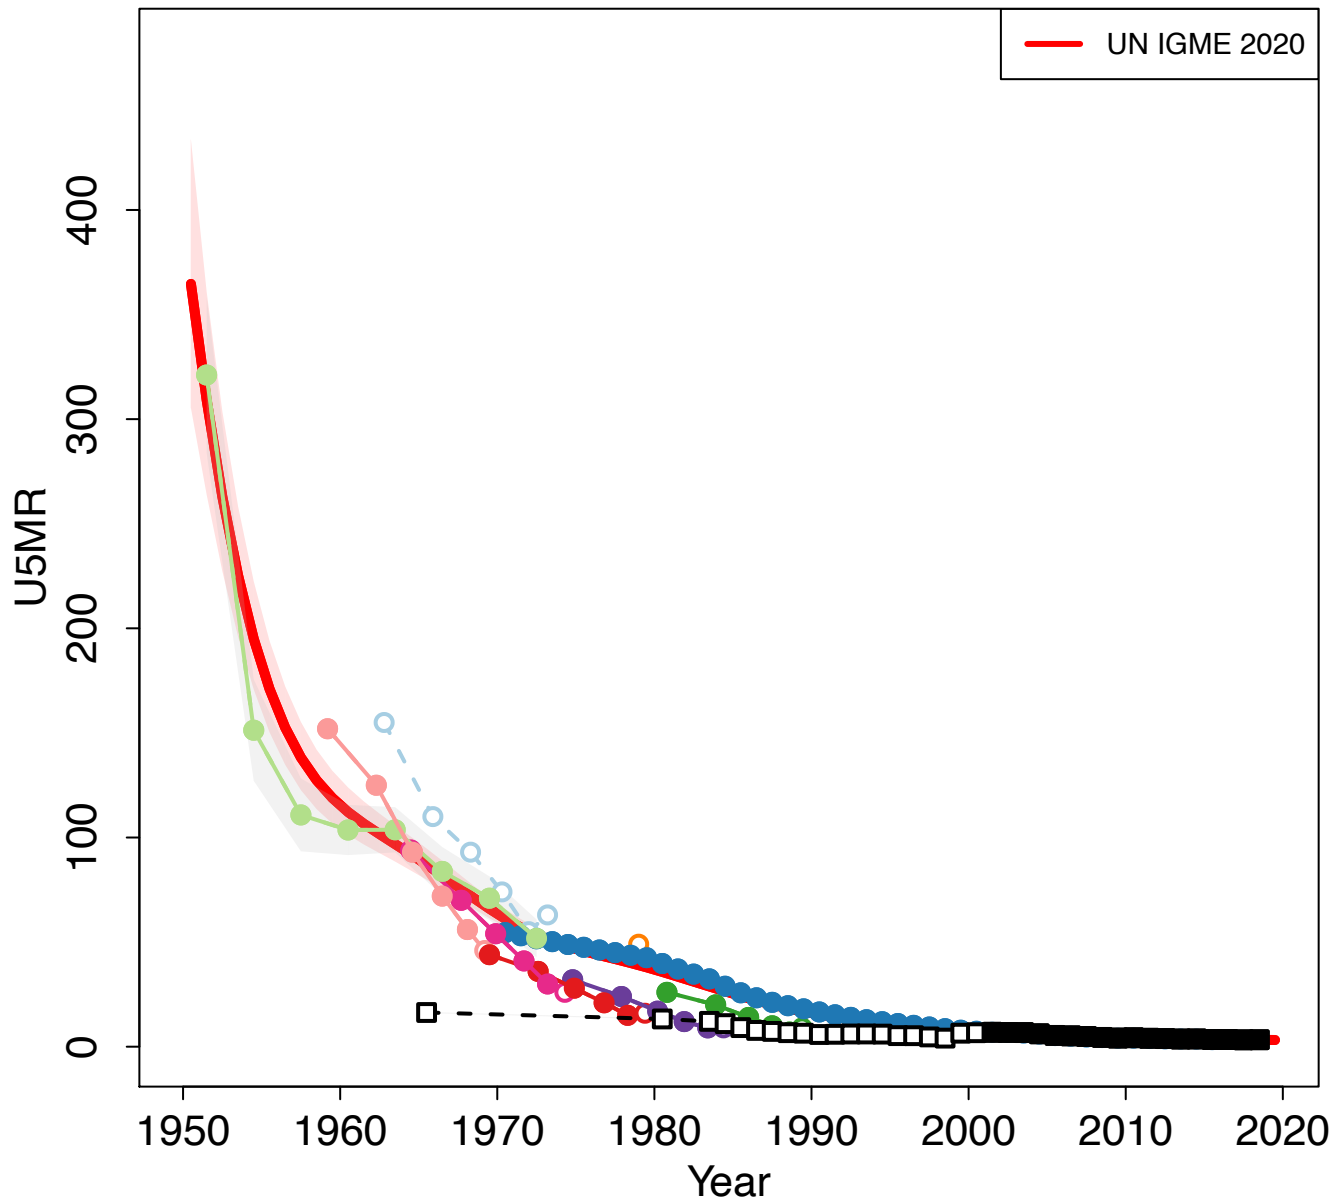

# Zoomed in

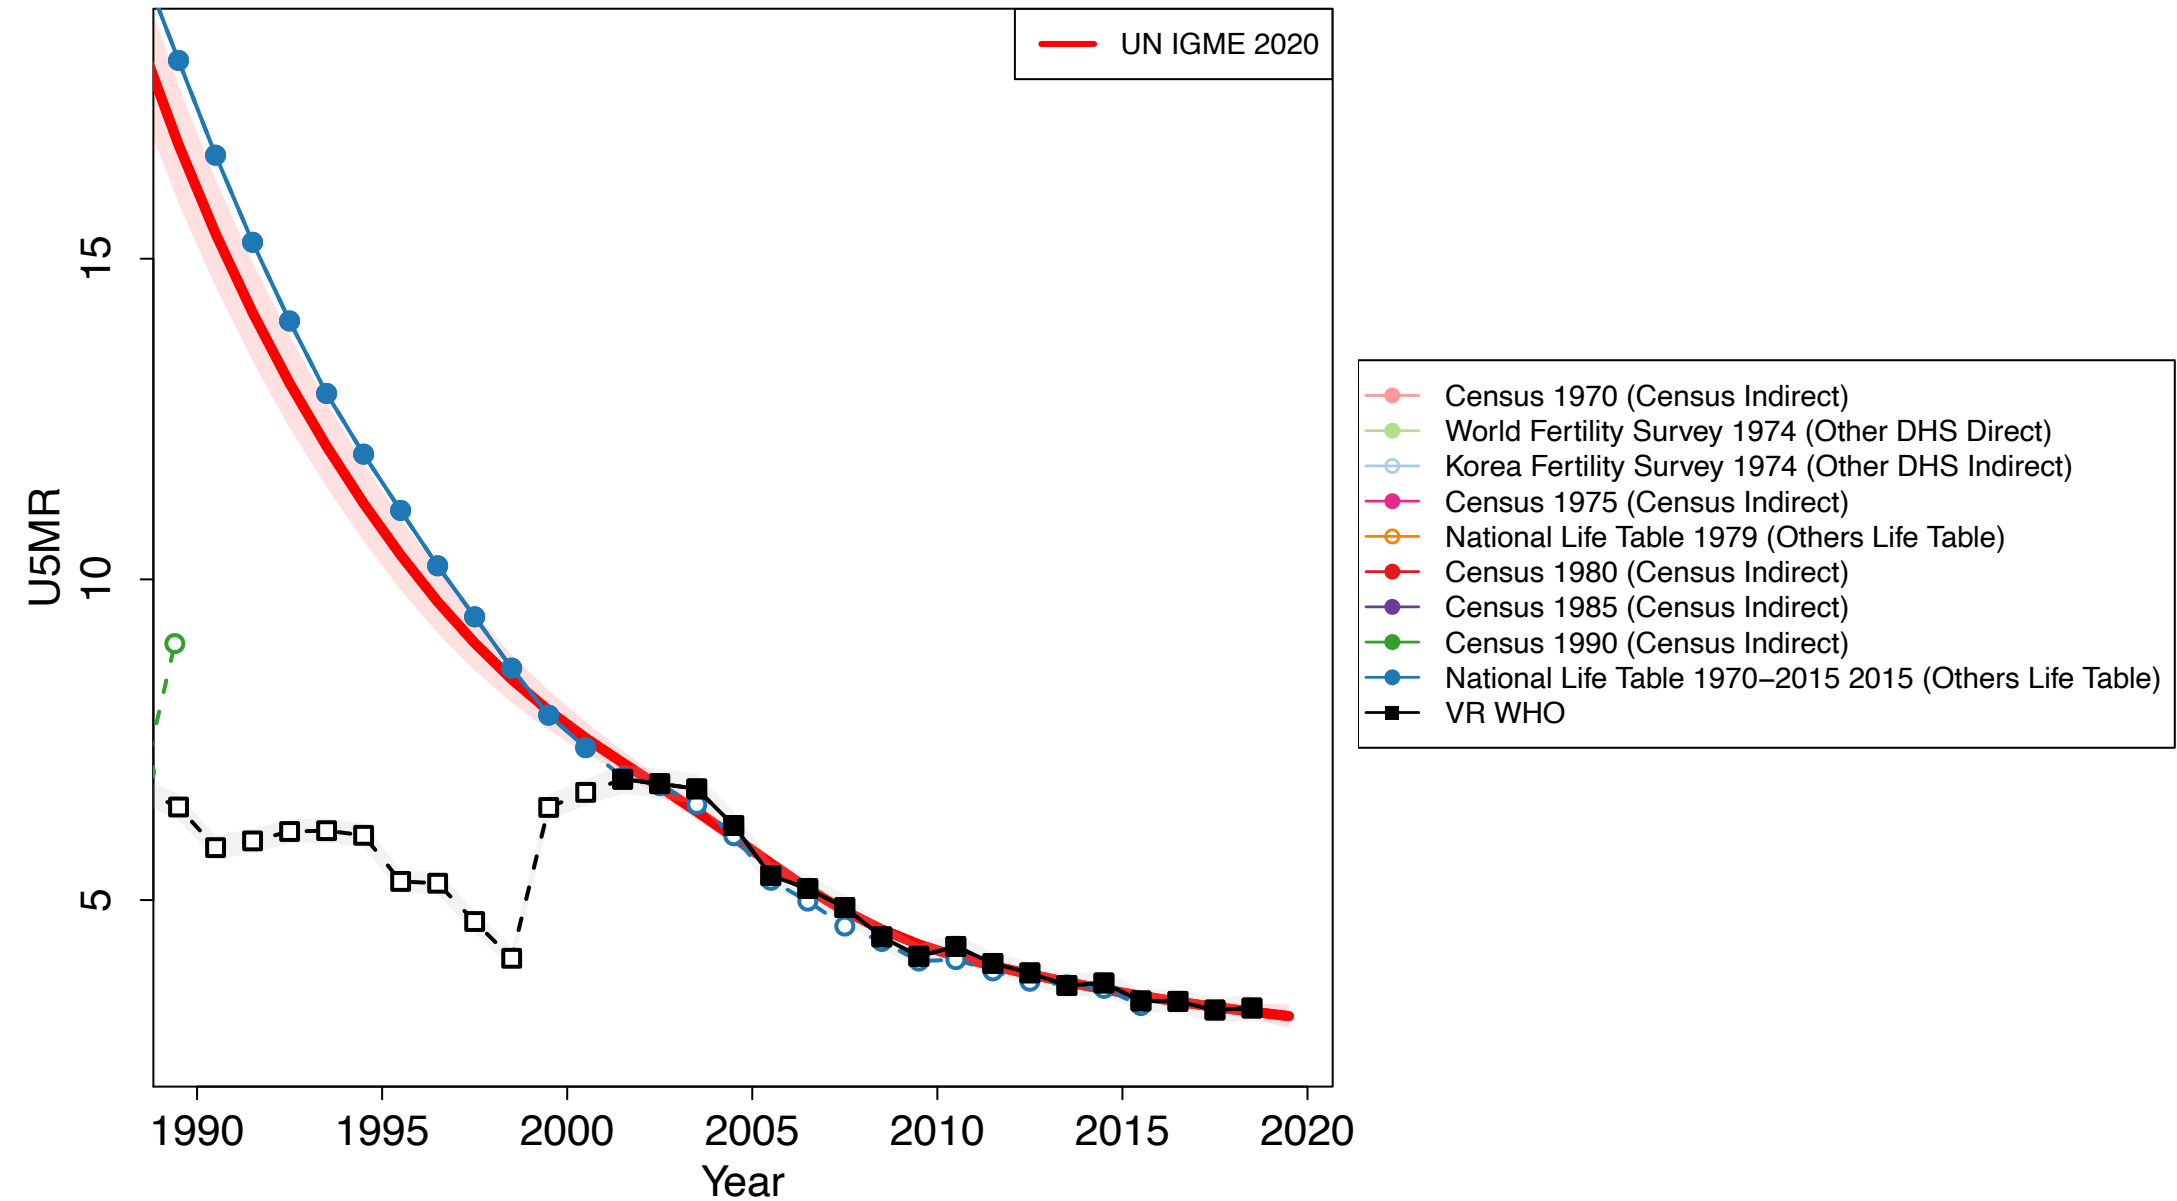

### Kuwait

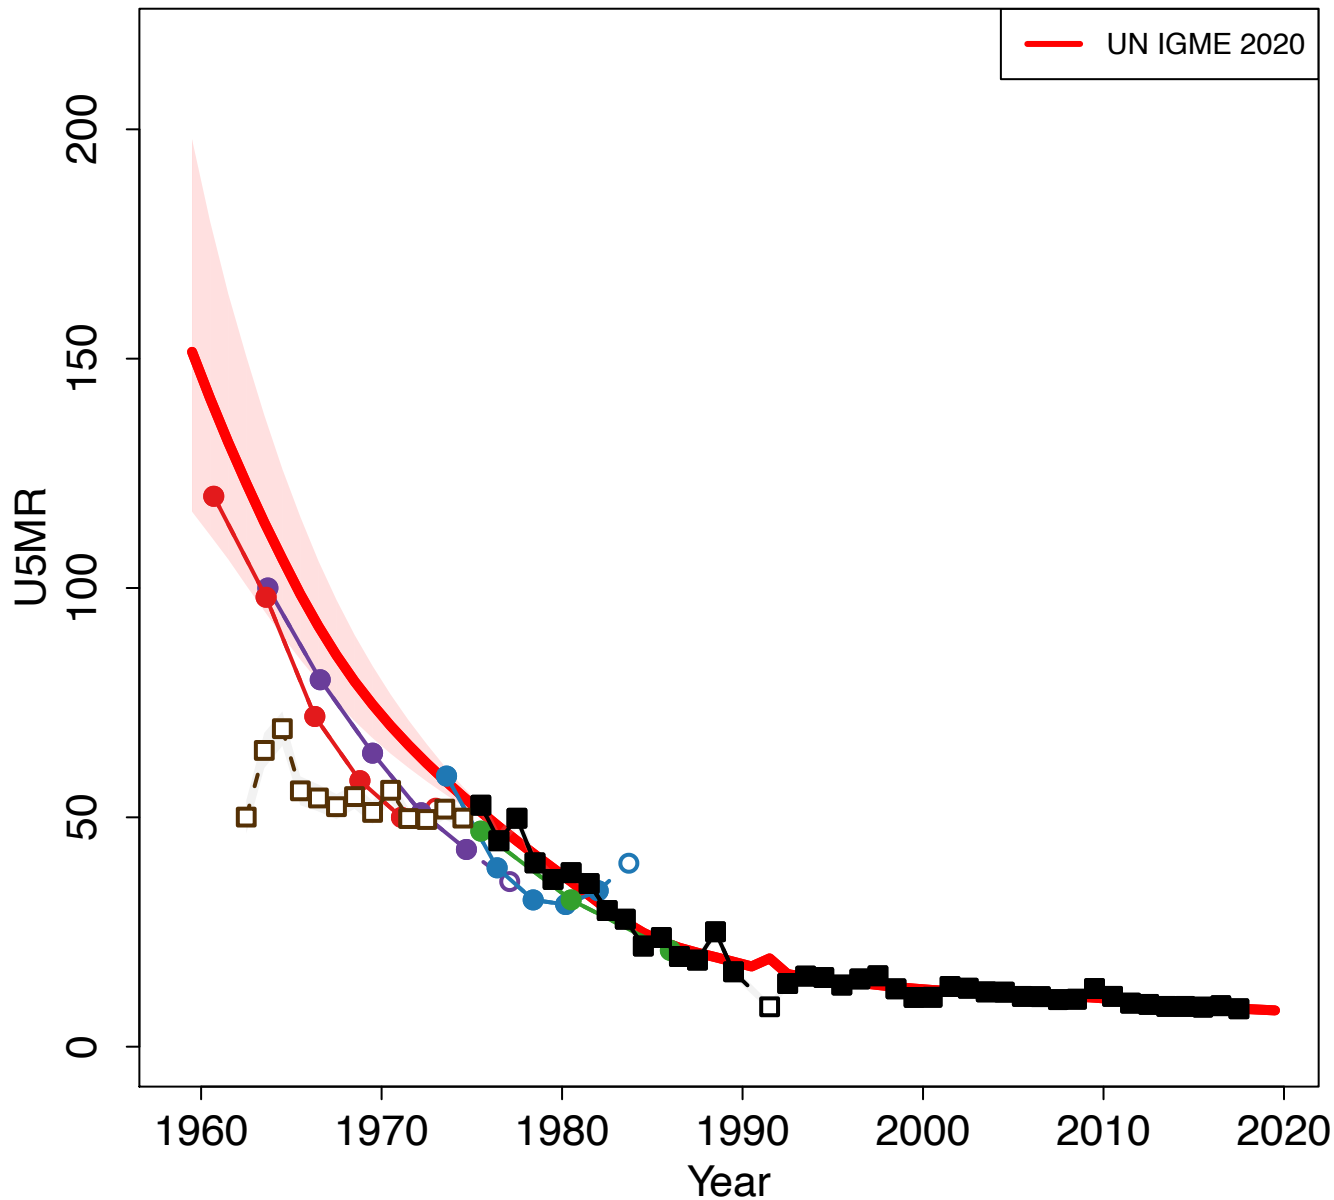

### Zoomed in

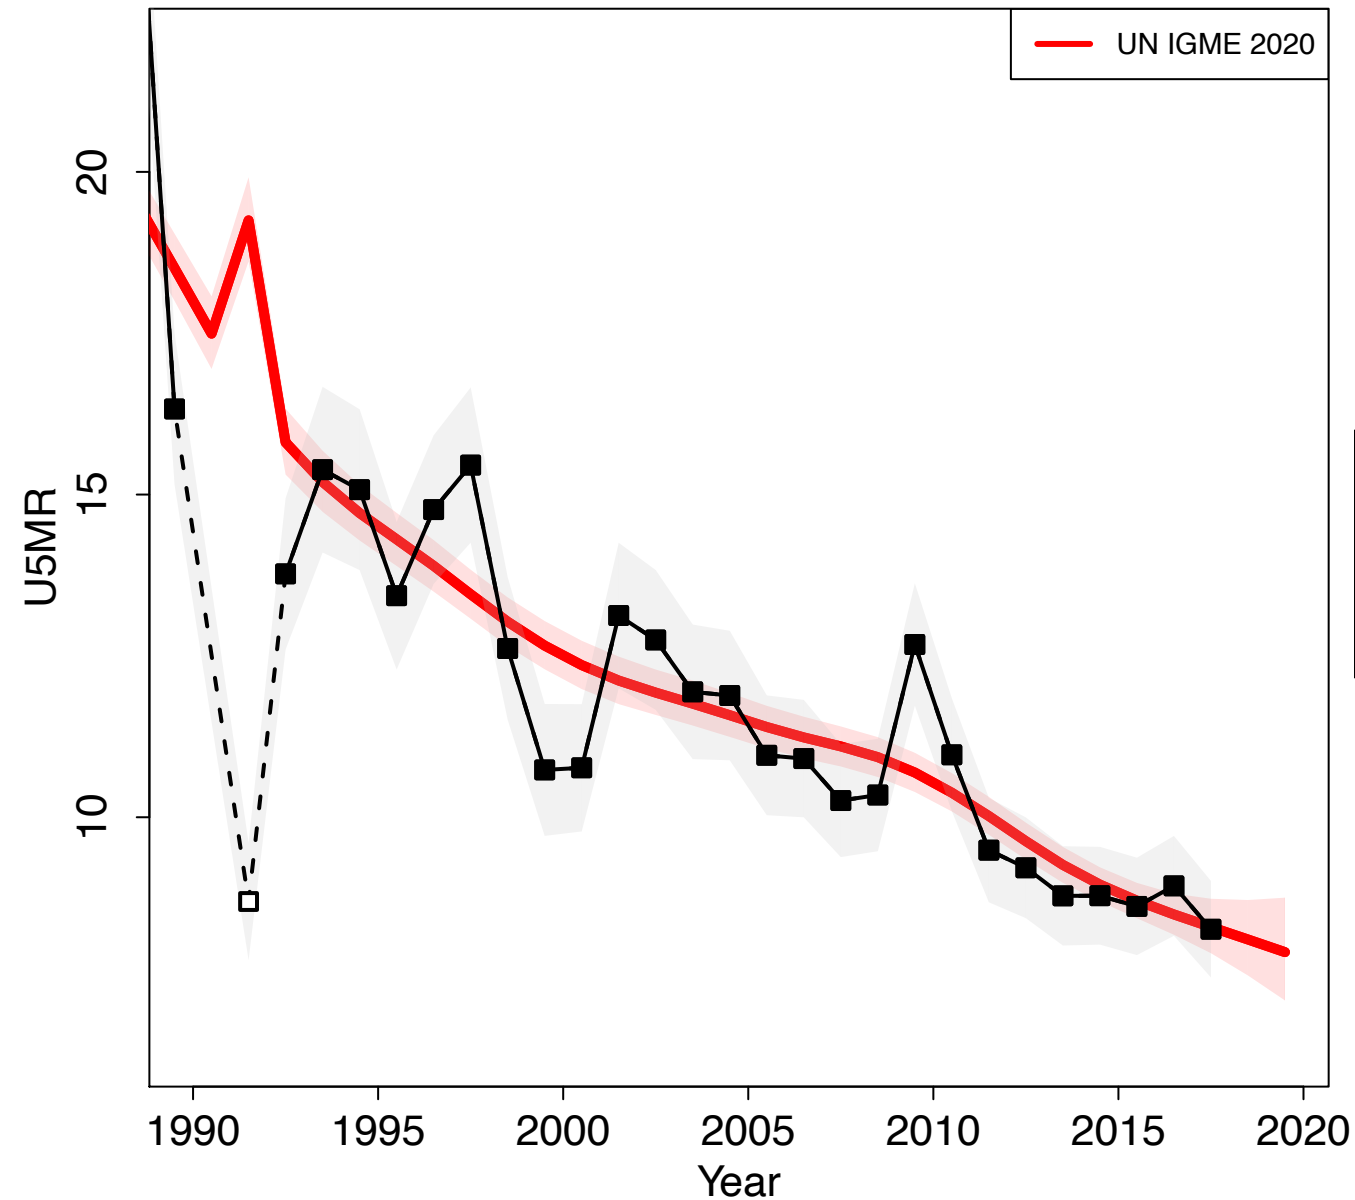

# Kyrgyzstan

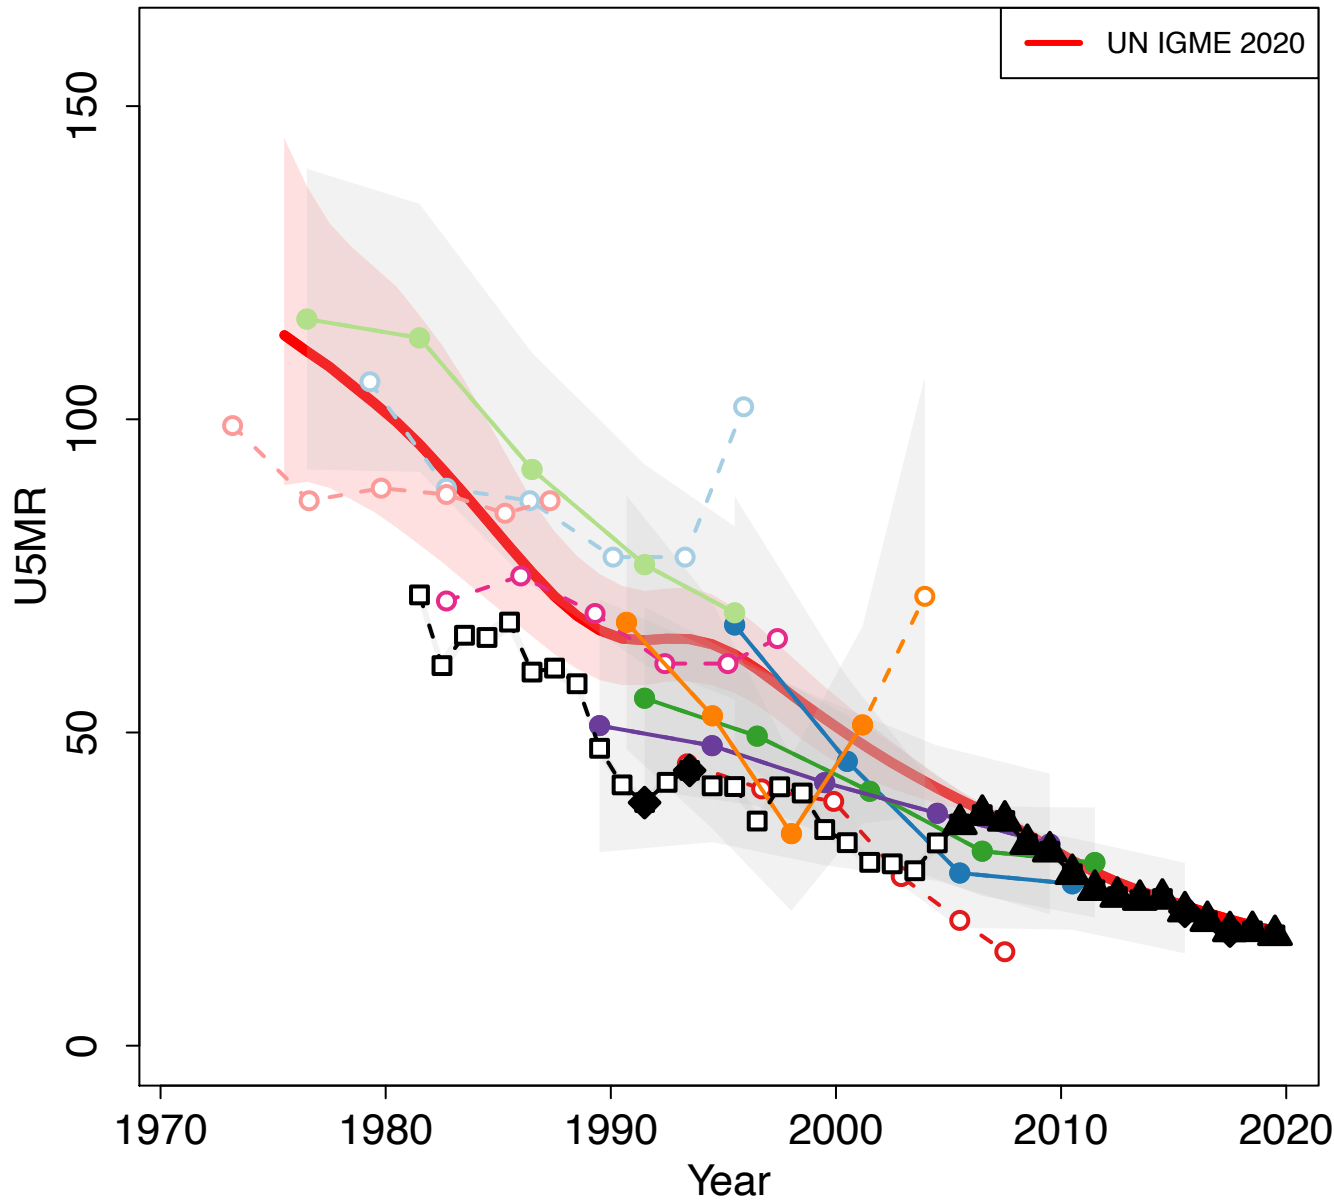

# Zoomed in

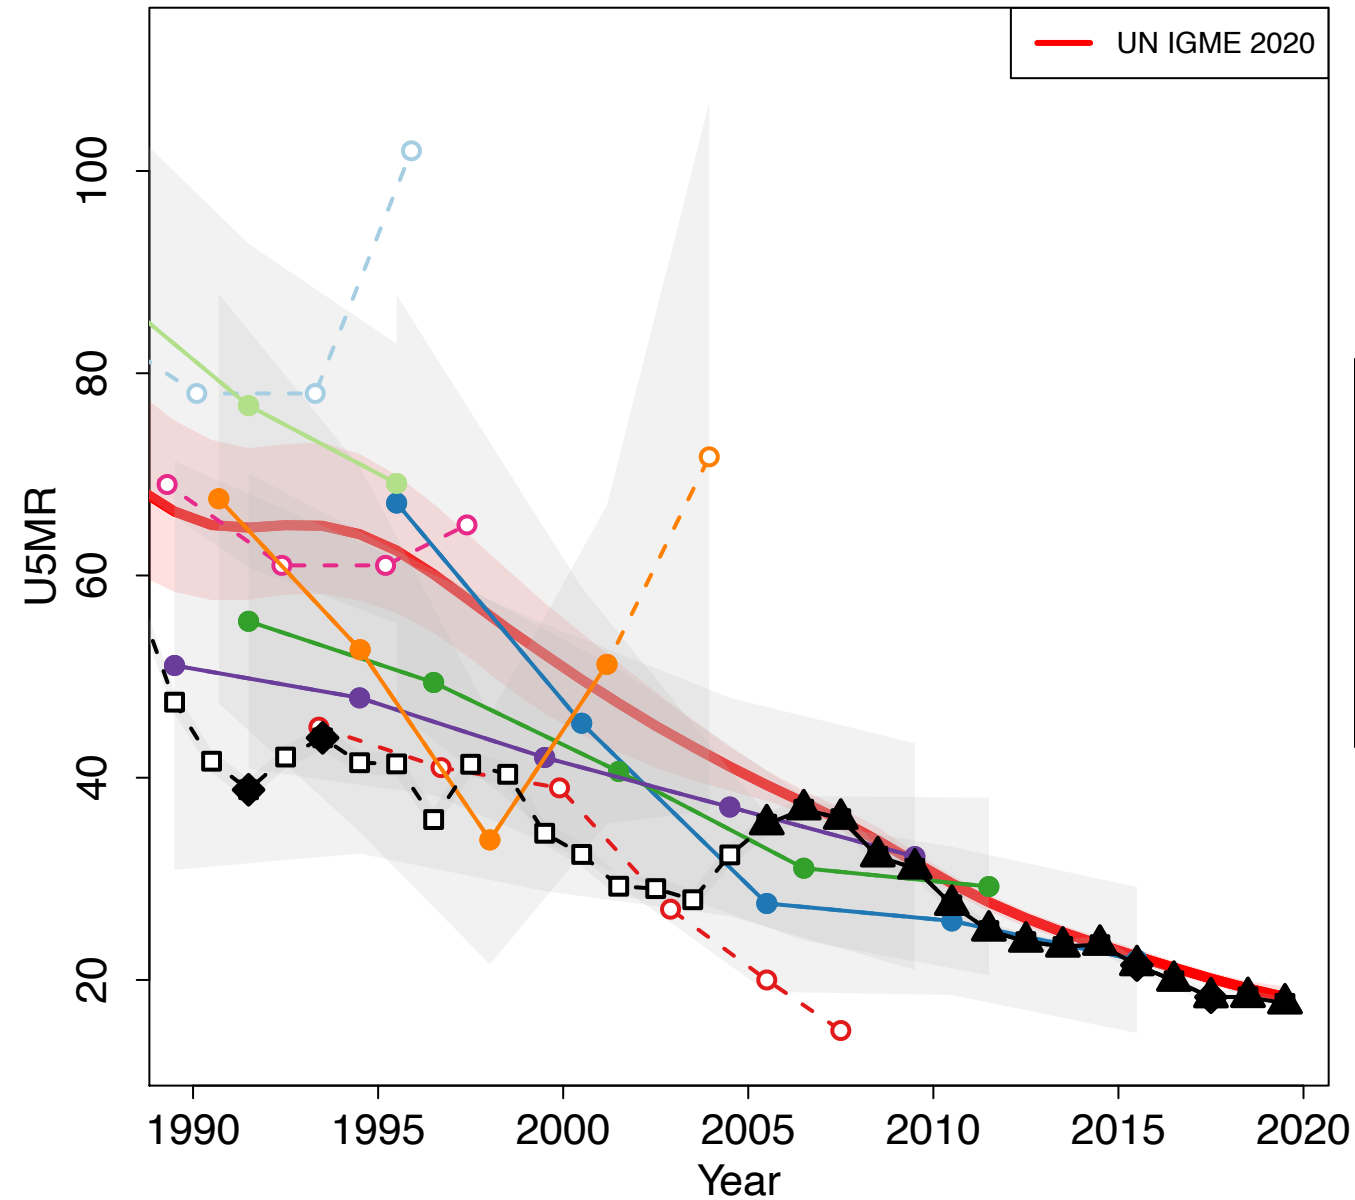

# Lao People's Democratic Republic

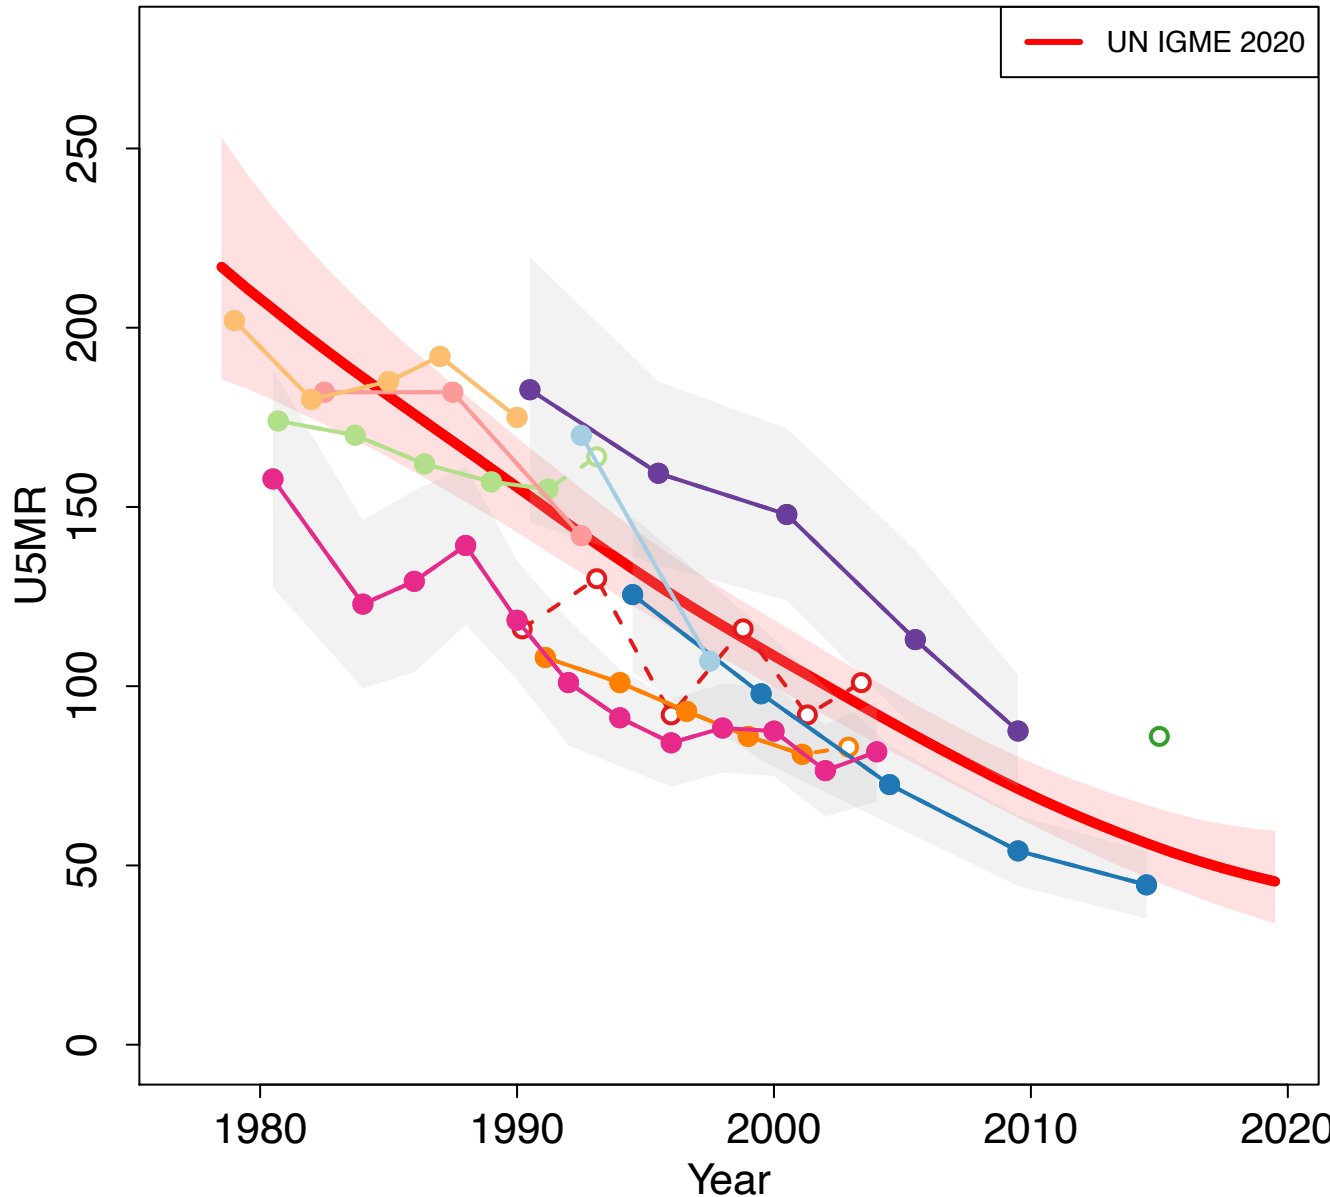

# Zoomed in

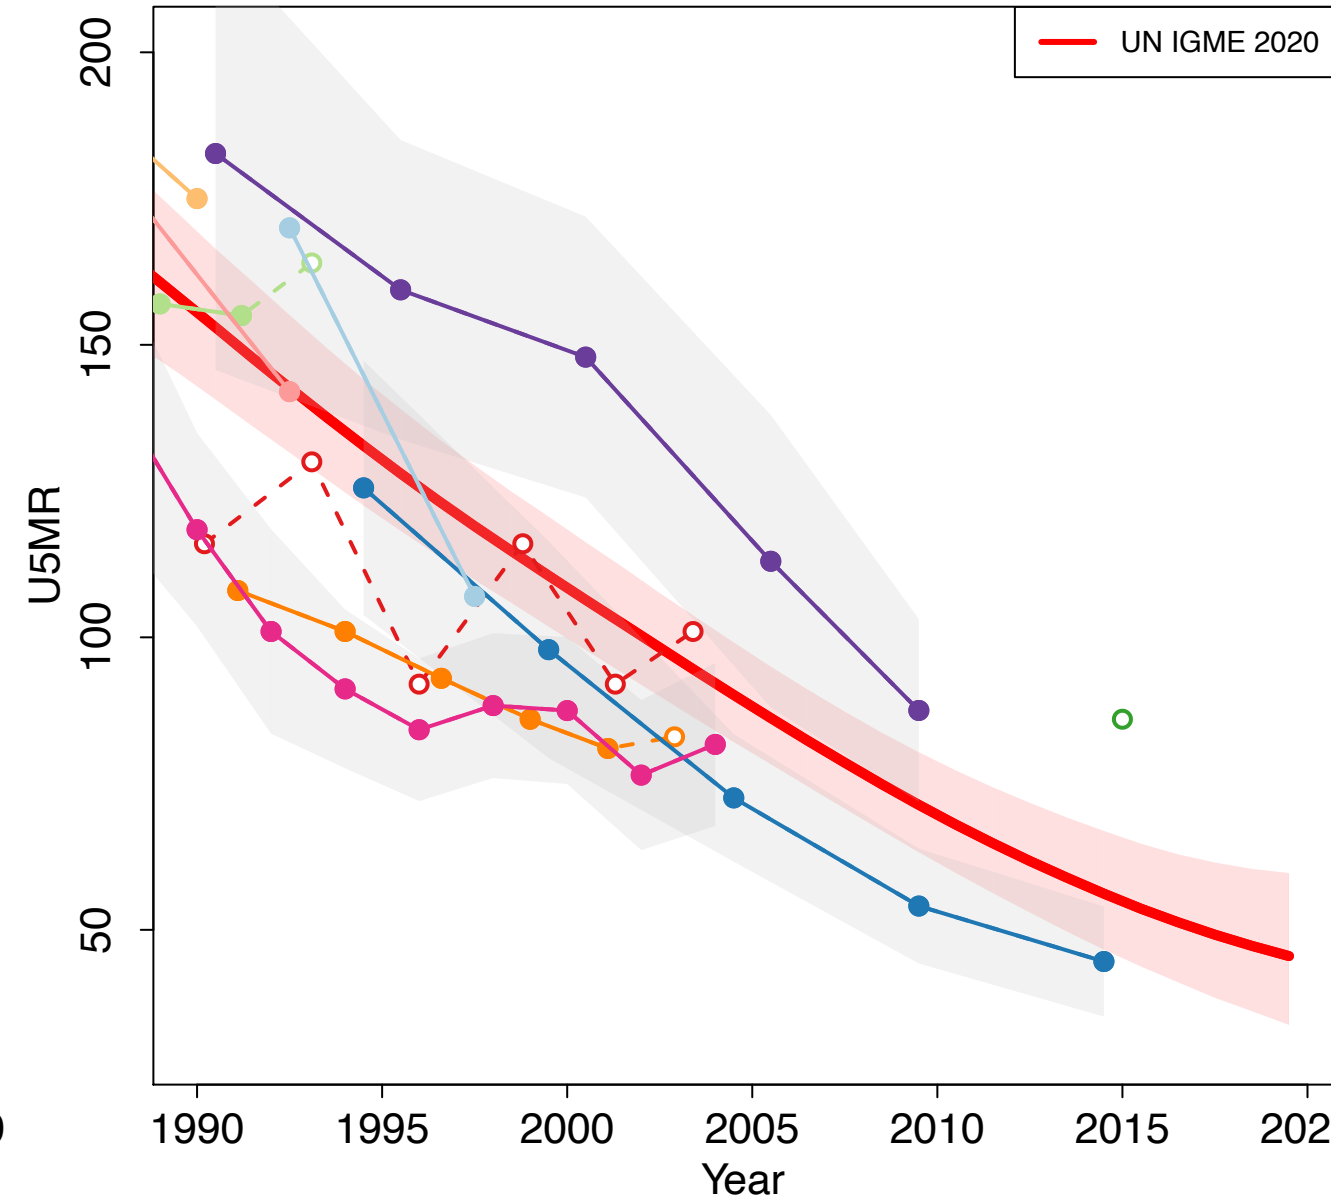

- Social Indicator Survey 1993 (Others Indirect)
- Fertility and Birth Spacing Survey 1994 (Others Direct)
- Census 1995 (Census Indirect)
- Reproductive Health Survey 2000 (Others Direct)
- Reproductive Health Survey 2005 (Others Direct)
- Census 2005 (Census Indirect)
- Reproductive Health Survey 2005 (Others Indirect)
- Lao Social Indicator Survey (combined MICS4/DHS) 2012 (DHS Direct)
- Census 2015 (Census Direct)
- Lao Social Indicator Survey 2017 (MICS Direct)



### Latvia

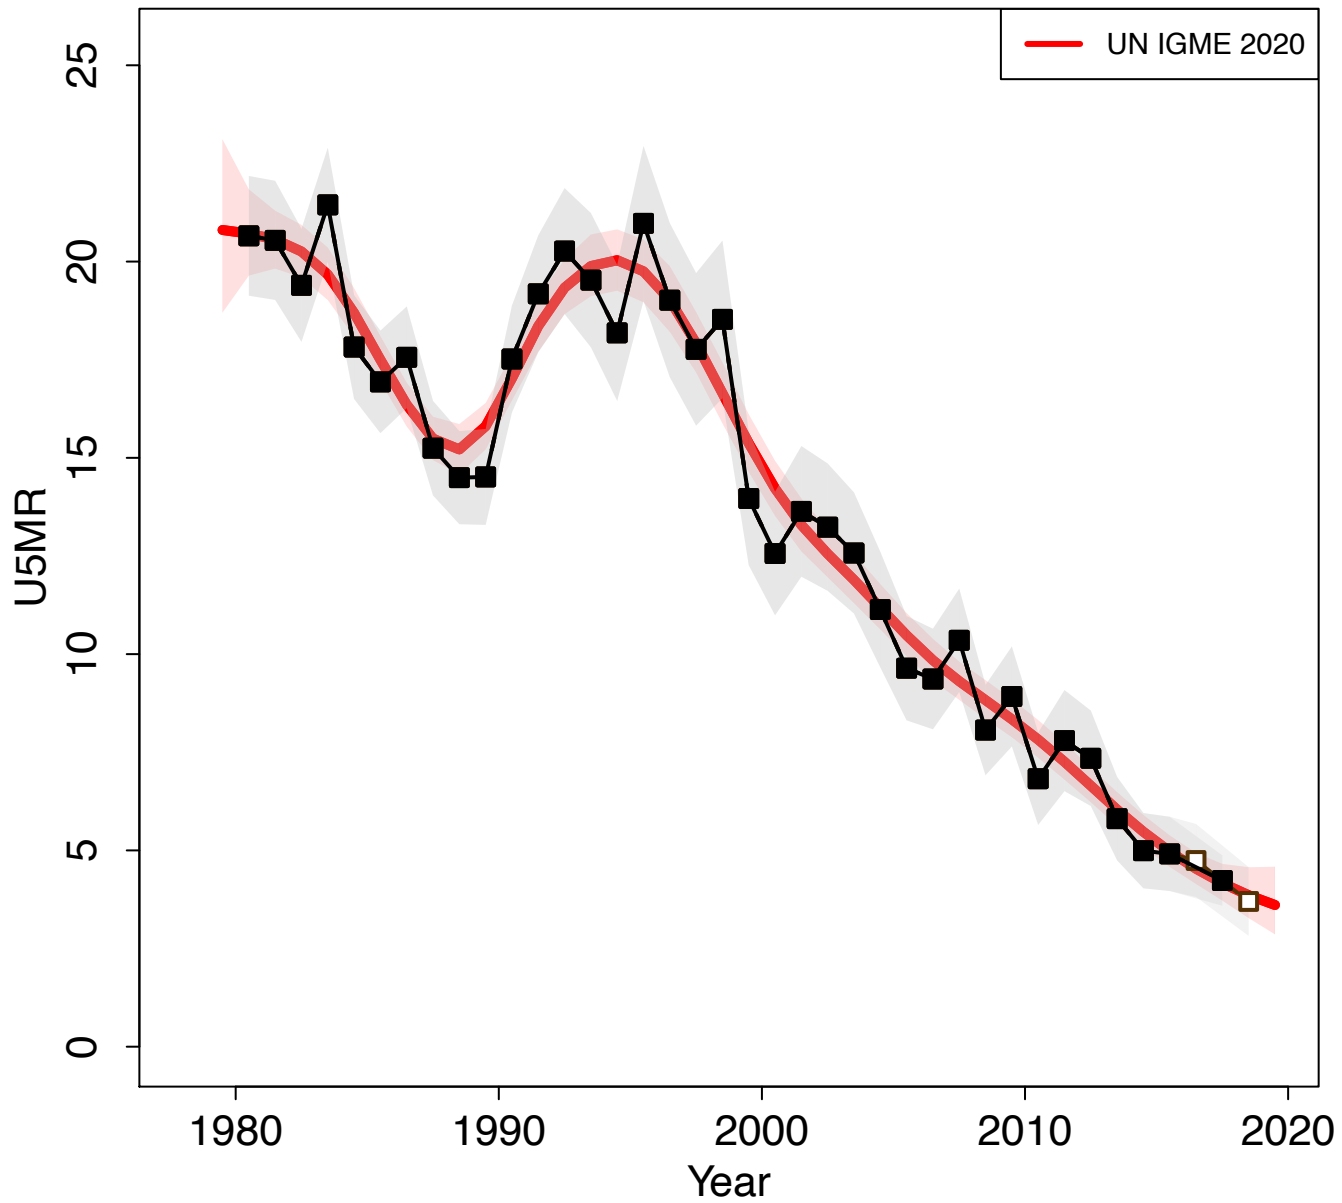

### Zoomed in

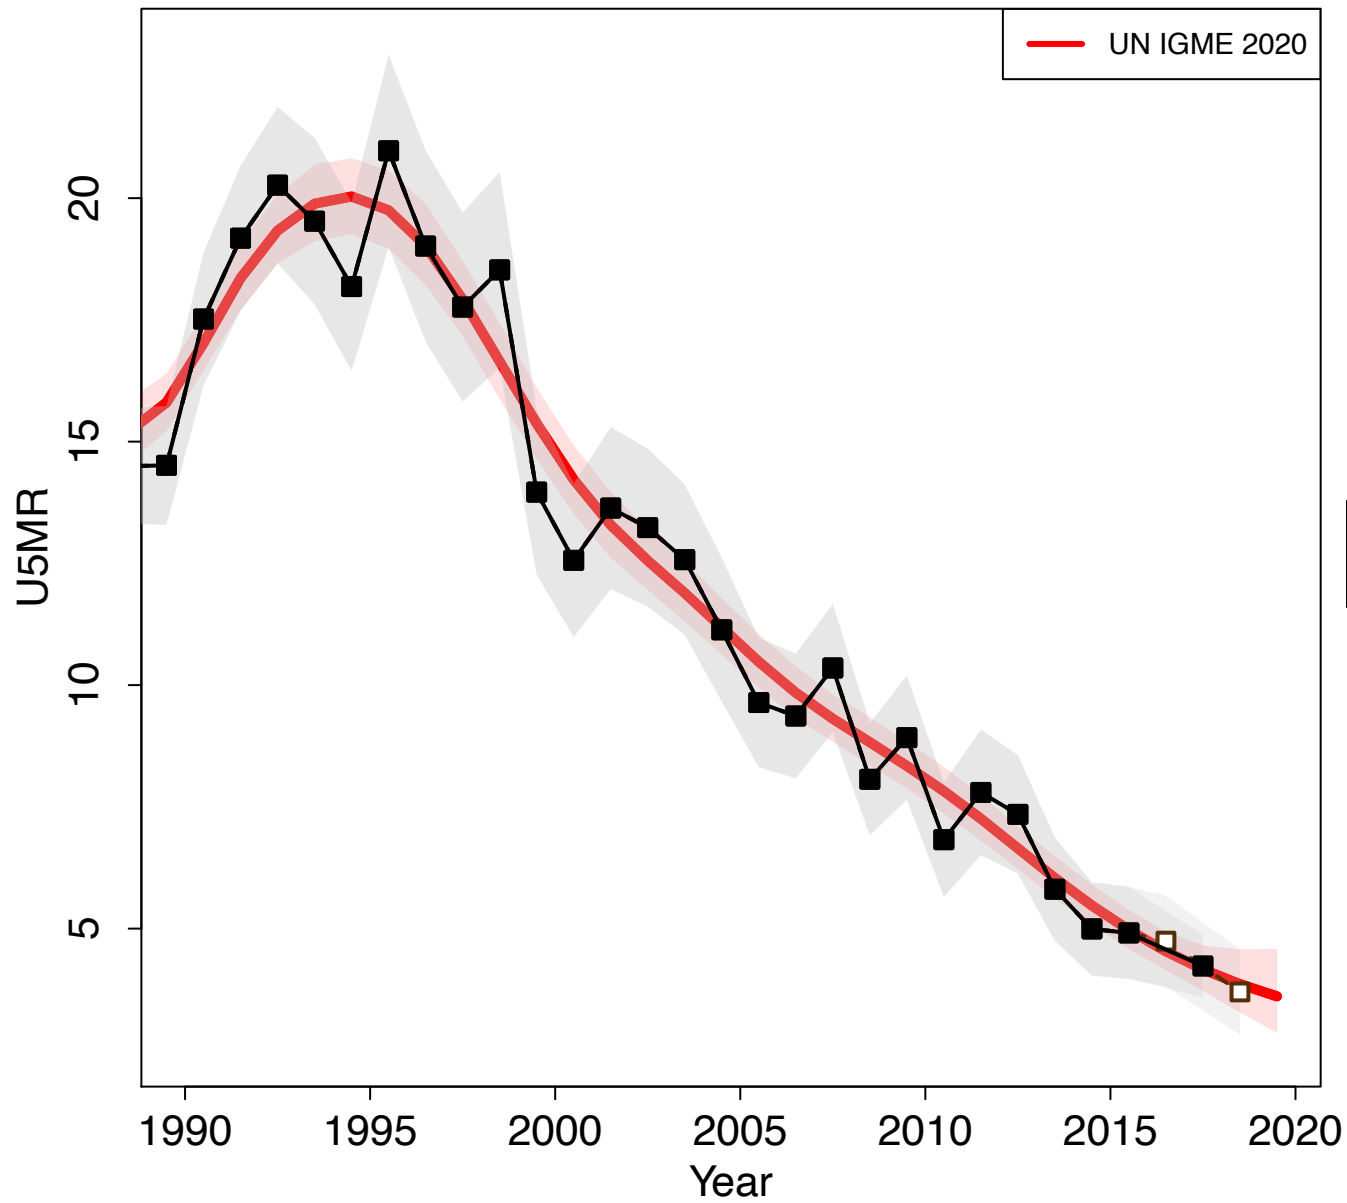

### Lebanon

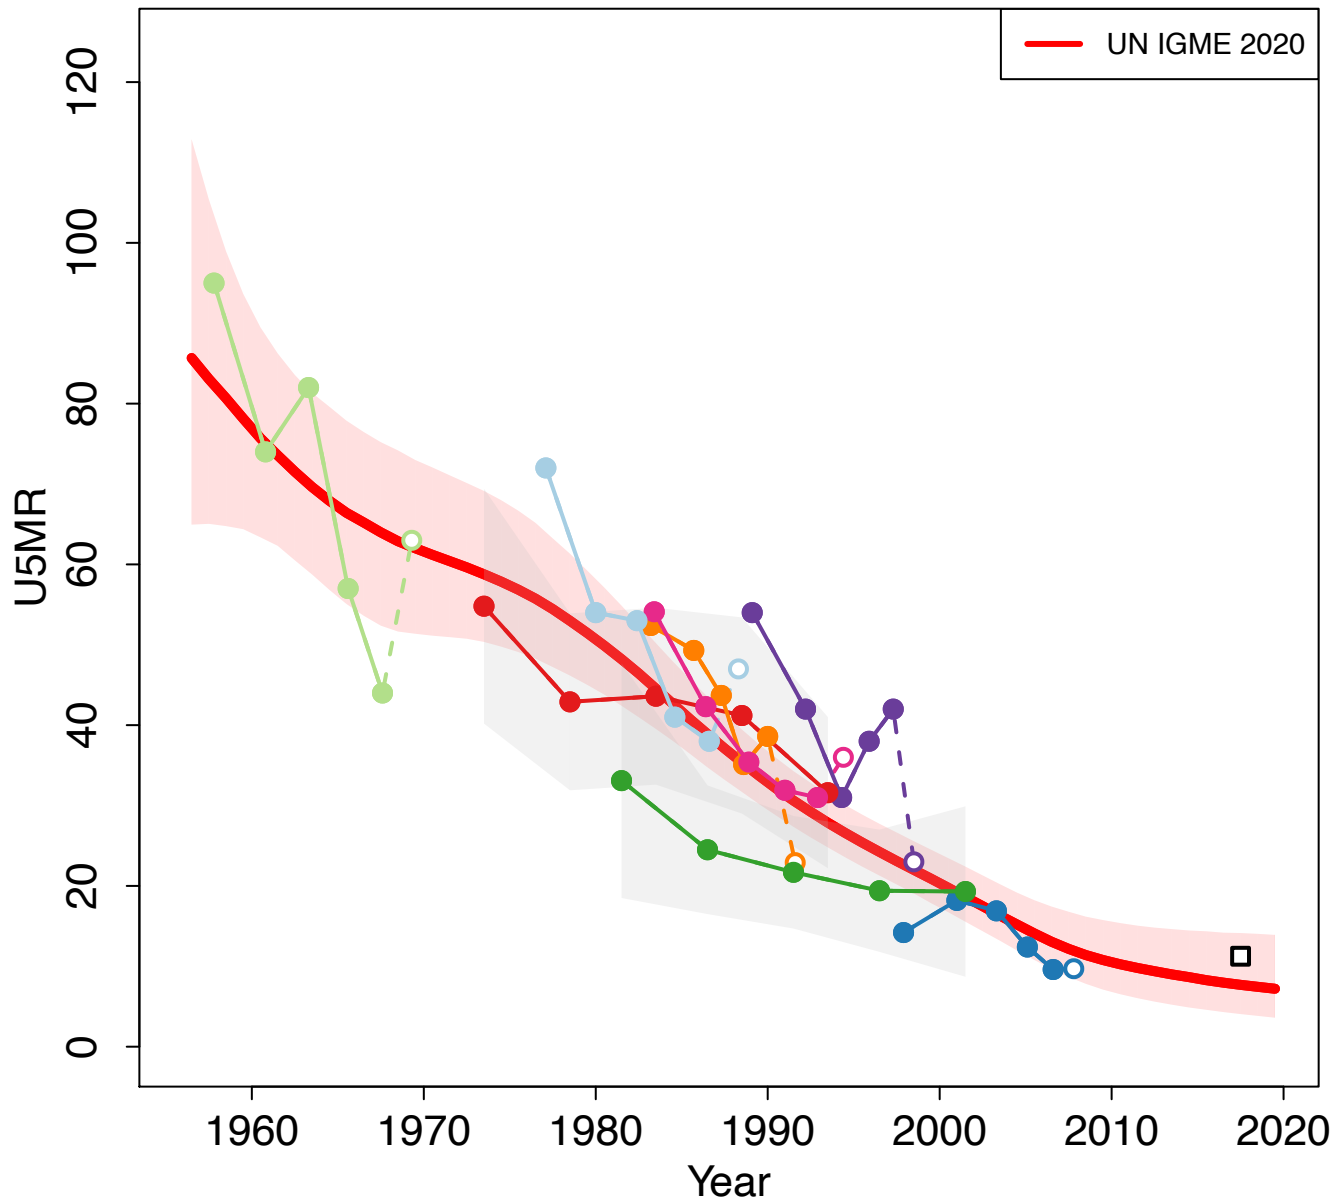

### Zoomed in

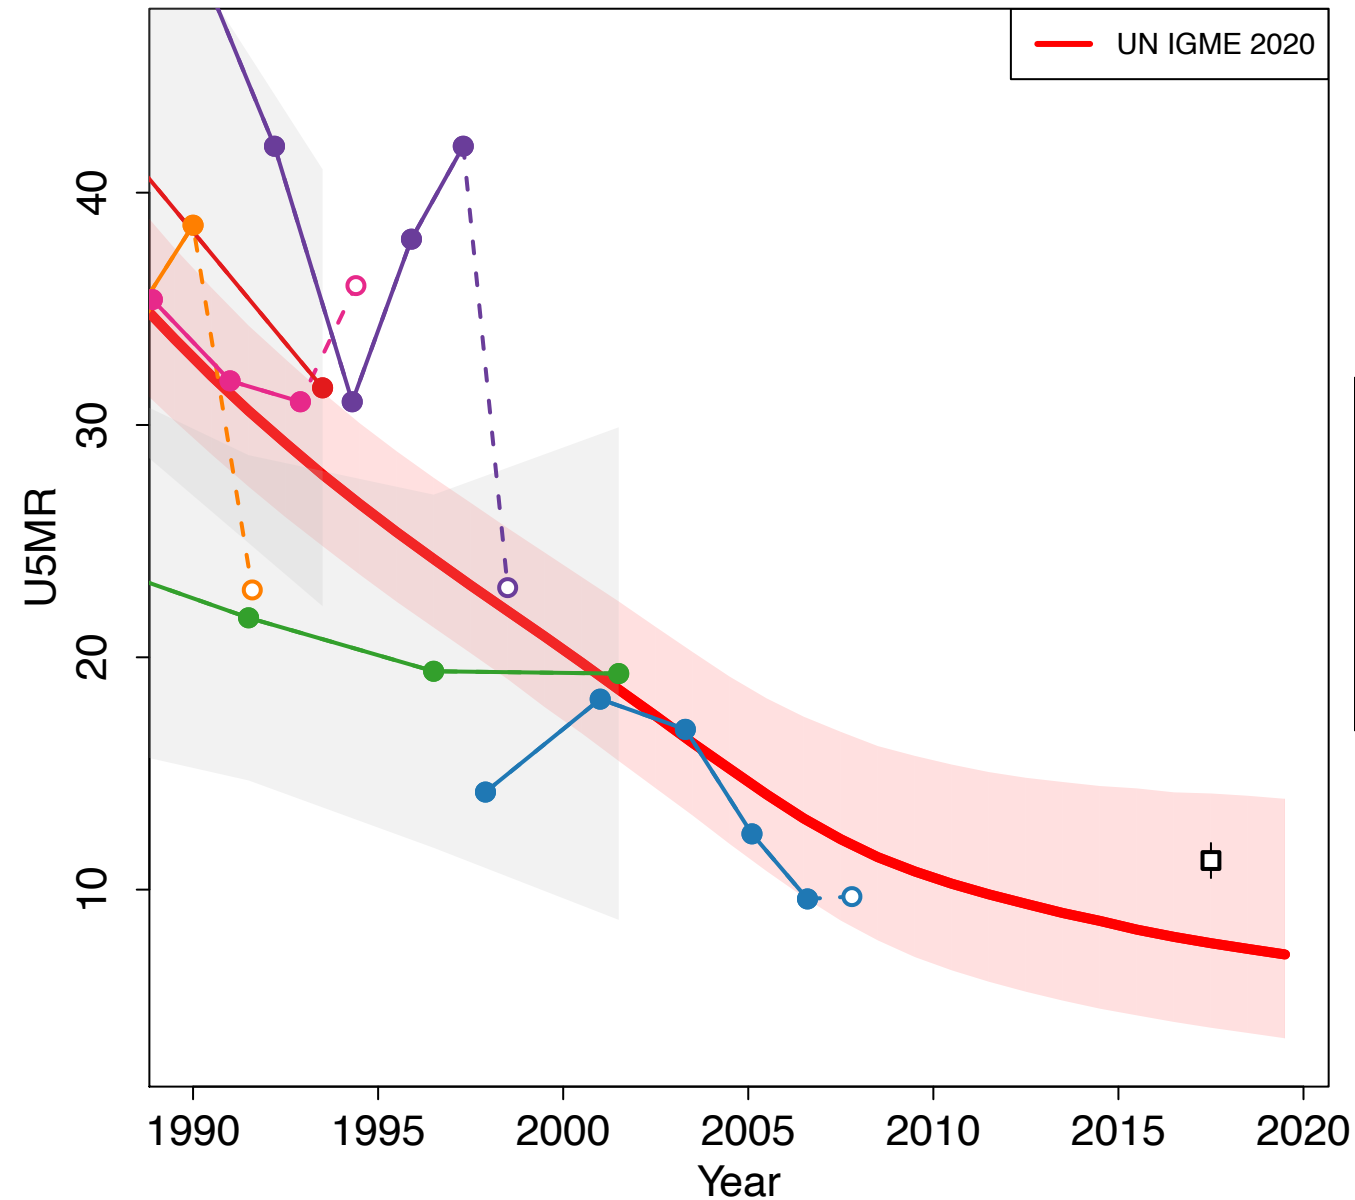

- National Fertility and Family Planning Survey 1971 (Others Indirect)
- National EPI CDD IMR Survey 1990 (Others Indirect)
- Population and Housing Survey 1996 (Others Indirect)
- Maternal and Child Health Survey 1996 (Others Indirect)
- PAPCHILD Maternal and Child Health Survey 1996 (Others Direct)
- Multiple Indicator Cluster Survey 2000 (Others Indirect)
- PAPFAM Family Health Survey 2004 (Others Direct)
- Multiple Indicator Cluster Survey 2009 (Others Indirect)
- VR WHO

# Lesotho

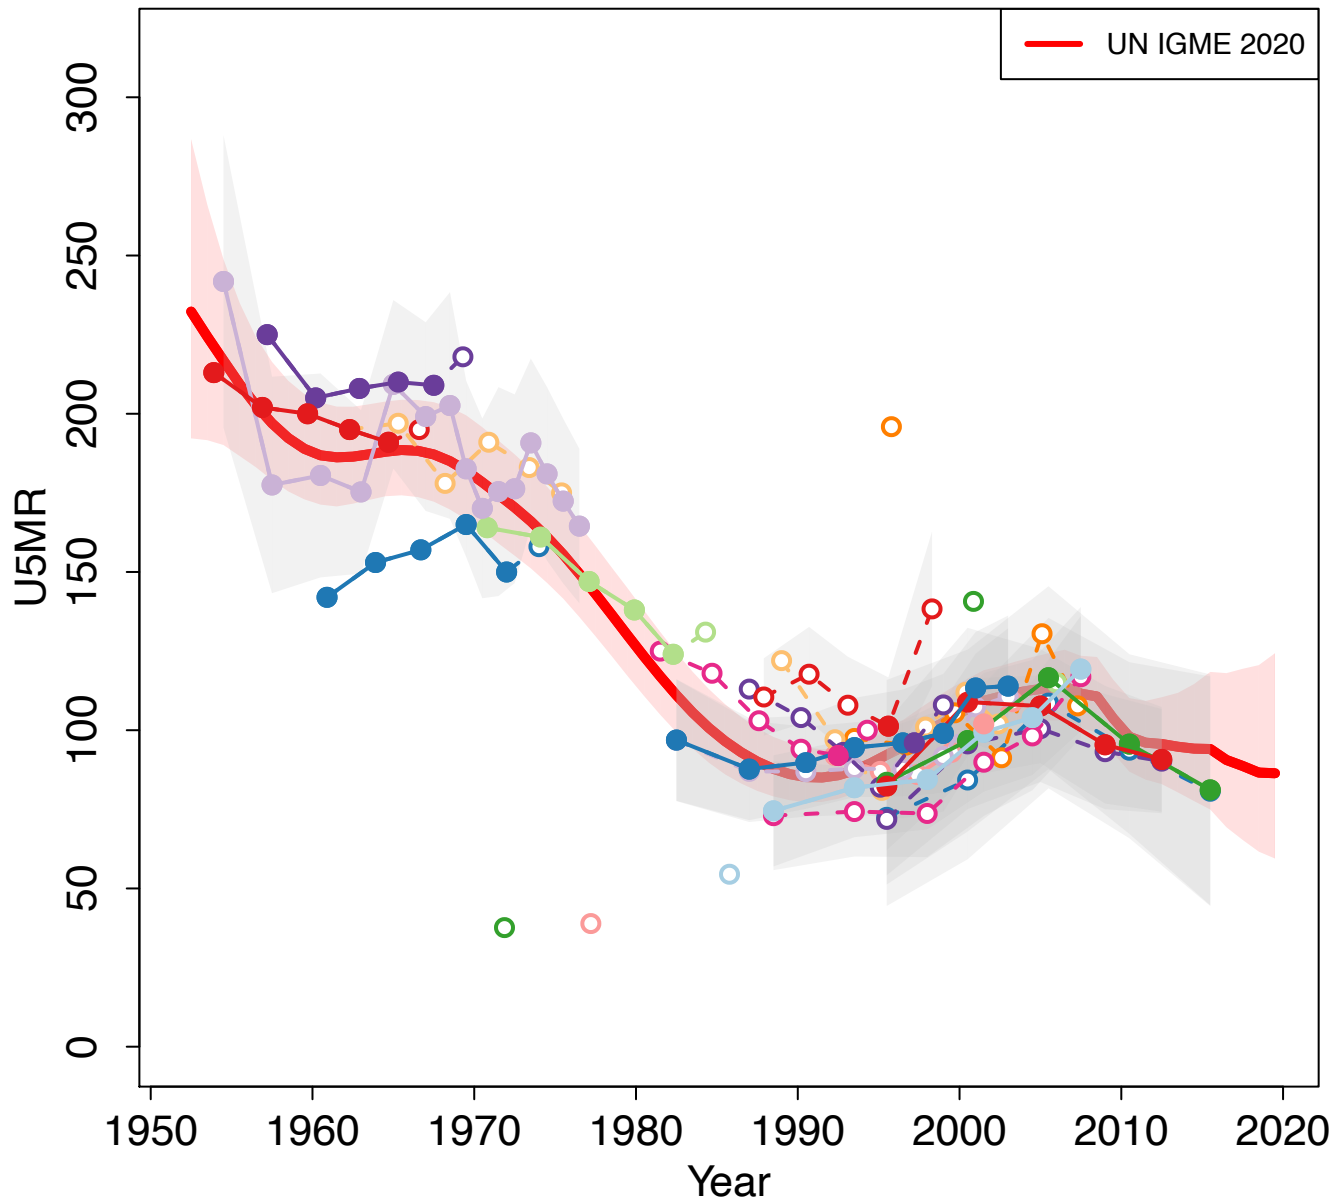

# Zoomed in

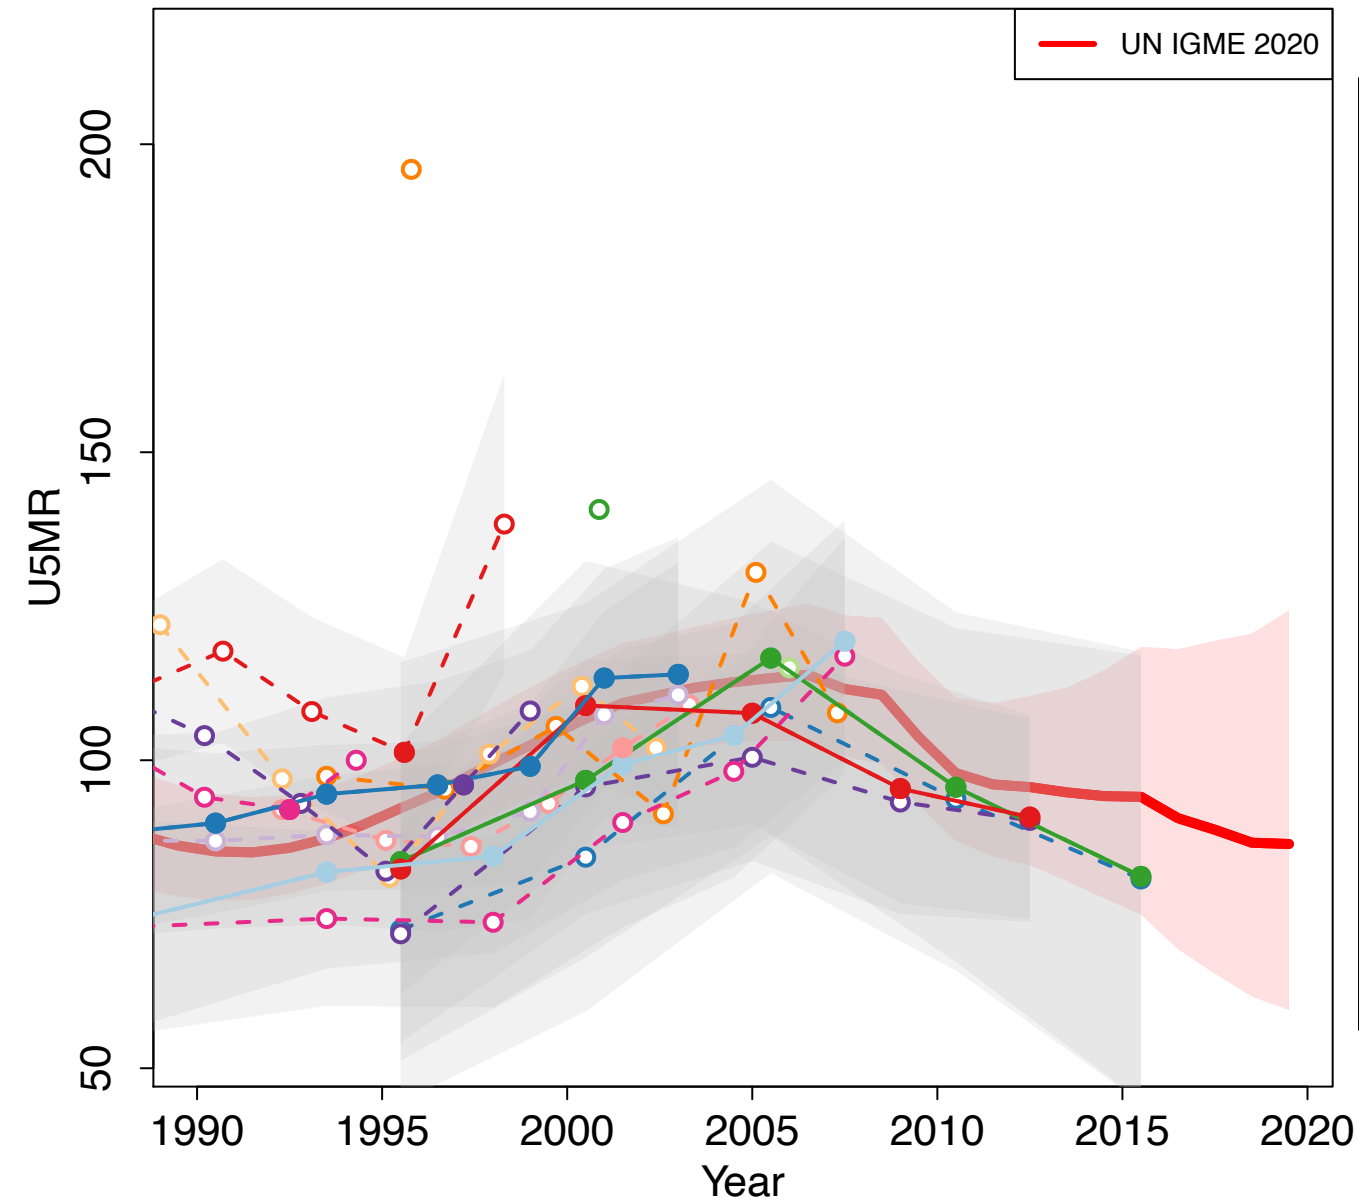

- ces 1968 (Others Indirect)
- Demographic Survey 1971–1973 (Others Indirect)
- Demographic Survey 1971–1973 (Others Household Deaths)
- Census 1976 (Census Indirect)
- World Fertility Survey 1977 (Other DHS Direct)
- World Fertility Survey 1977 (Other DHS Indirect)
- World Fertility Survey 1977 (Others Household Deaths)
- Census 1986 (Census Indirect)
- Census 1986 (Others Household Deaths)
- Census 1996 (Census Indirect)
- Census 1996 (Others Household Deaths)
- Multiple Indicator Cluster Survey 2000 (MICS Indirect)
- Demographic Survey 2001 (Others Indirect)
- Demographic Survey 2001 (Others Household Deaths)
- Demographic and Health Survey (MM adjusted) 2004 (DHS Direct)
- Demographic and Health Survey 2004 (DHS Direct)
- Demographic and Health Survey 2004 (DHS Indirect)
- Census 2006 (Census Indirect)
- Census 2006 (Others Household Deaths)
- Demographic and Health Survey (MM adjusted) 2009 (DHS Direct)
- Demographic and Health Survey 2009 (DHS Direct)
- Demographic and Health Survey 2009 (DHS Indirect)
- Demographic and Health Survey (MM adjusted) 2014 (DHS Direct)
- Demographic and Health Survey 2014 (DHS Direct)
- Multiple Indicator Cluster Survey (MM adjusted) 2018 (MICS Direct)
- Multiple Indicator Cluster Survey 2018 (MICS Direct)

### Liberia

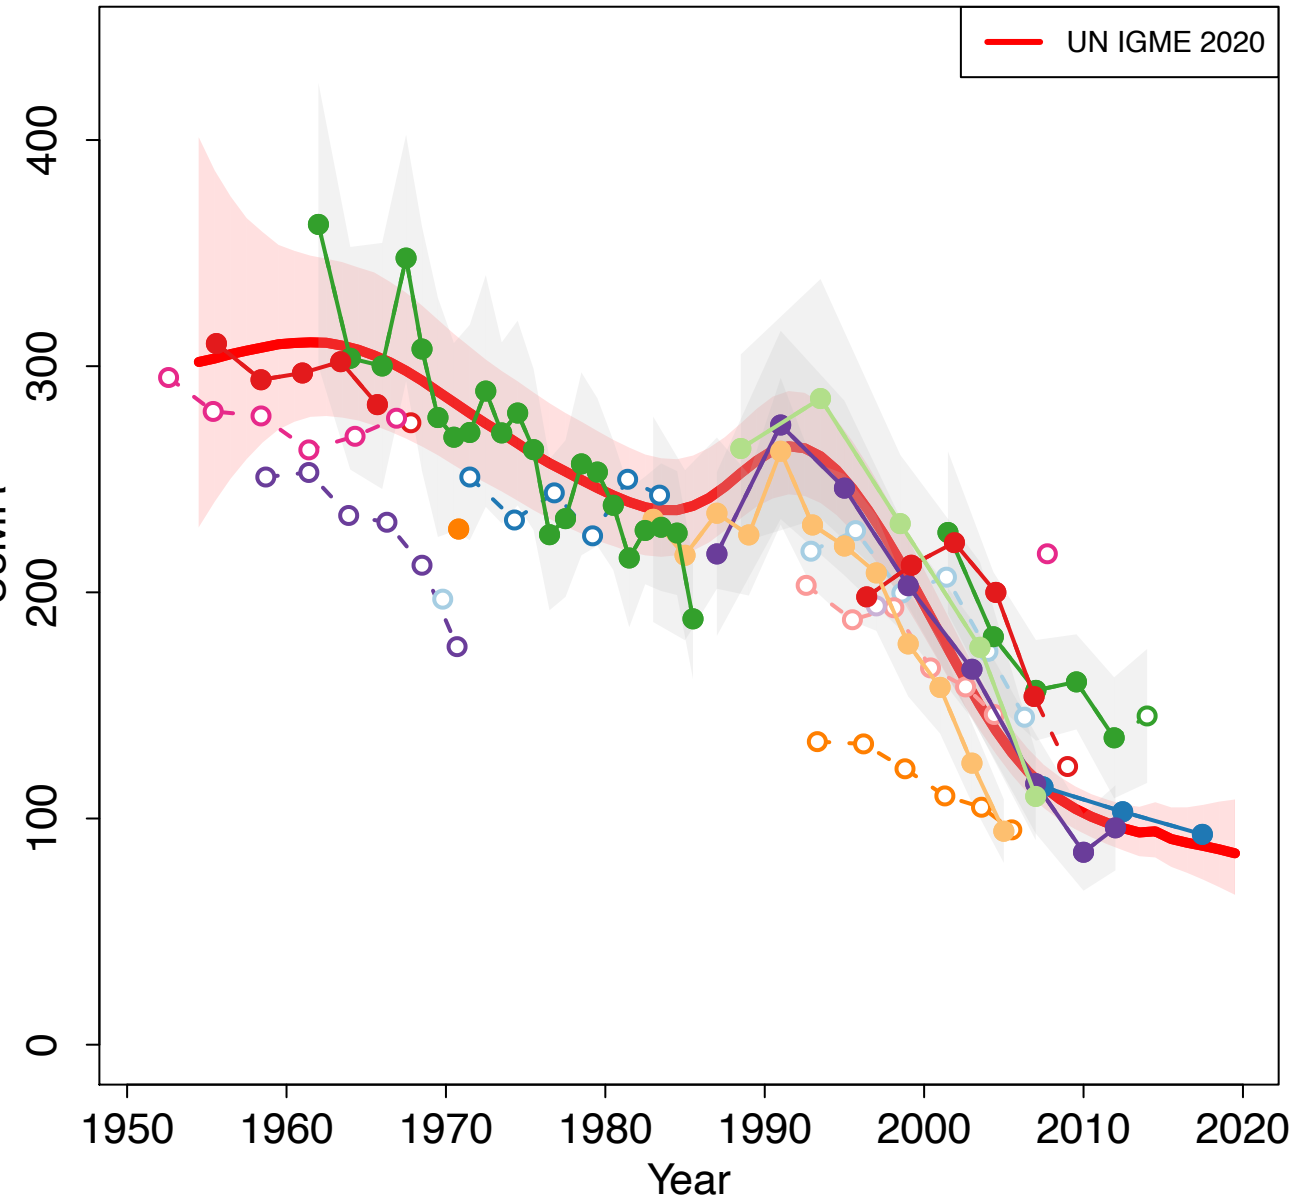

### Zoomed in

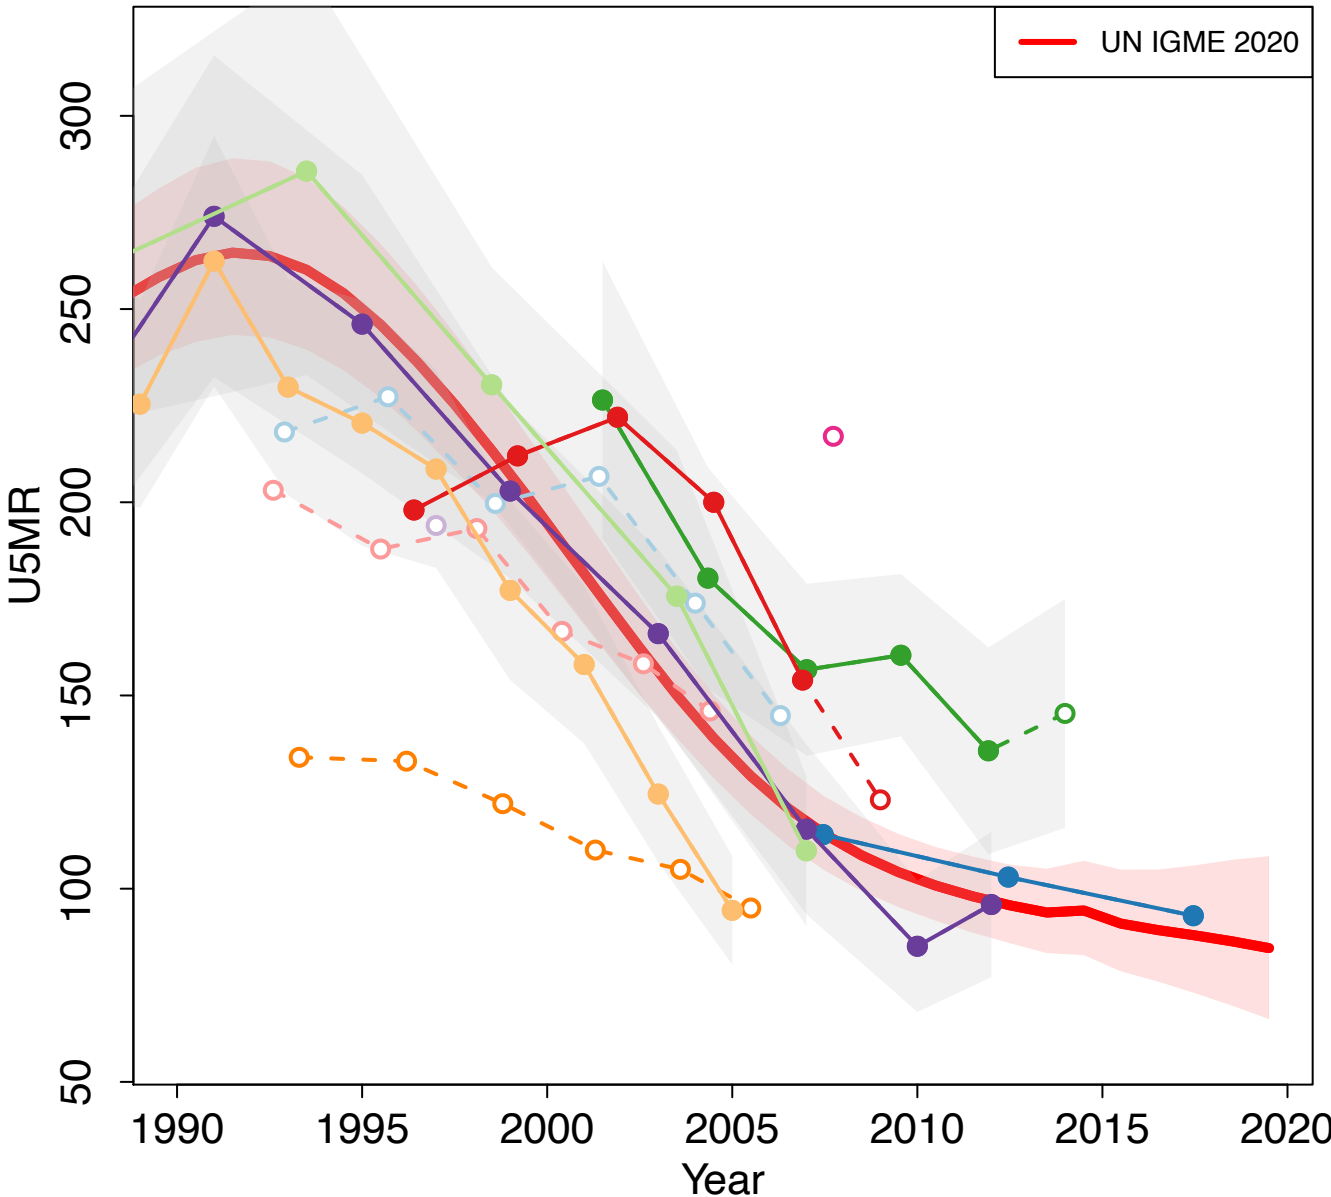

- Population Growth Survey 1969–1970 (Others Direct)
- Population Growth Survey 1969–1970 (Others Indirect)
- Population Growth Survey 1970–1971 (Others Direct)
- Population Growth Survey 1970–1971 (Others Indirect)
- Census 1974 (Census Indirect)
- Demographic and Health Survey 1986 (DHS Direct)
- Demographic and Health Survey 1986 (DHS Indirect)
- LDHS 1999–2000 (Other DHS Direct)
- Demographic and Health Survey 2006–2007 (DHS Direct)
- Demographic and Health Survey 2006–2007 (DHS Indirect)
- Malaria Indicator Survey 2008–2009 (Other DHS Direct)
- Malaria Indicator Survey 2008–2009 (Other DHS Indirect)
- Population and Housing Census 2008 (Others Household Deaths)
- Population and Housing Census 2008 (Census Indirect)
- Malaria Indicator Survey 2011 (Other DHS Indirect)
- Demographic and Health Survey 2013 (DHS Direct)
- Malaria Indicator Survey 2016 (Other DHS Indirect)
- Demographic and Health Survey (Preliminary) 2019–2020 (DHS Direct)

# Libya

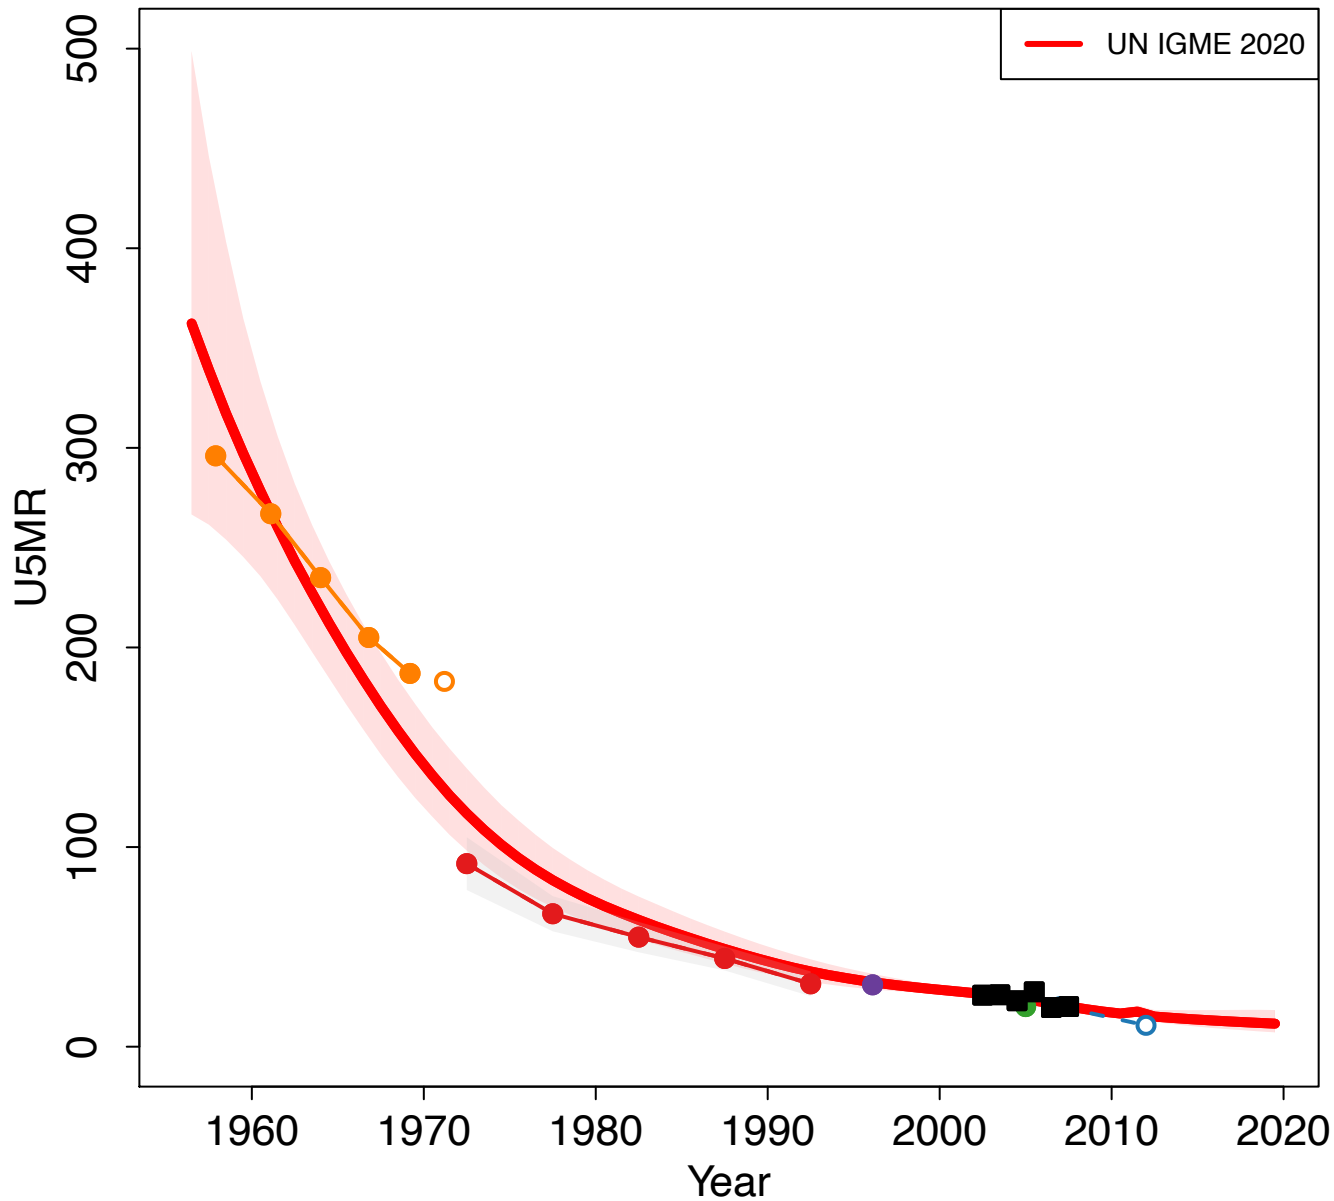

# Zoomed in

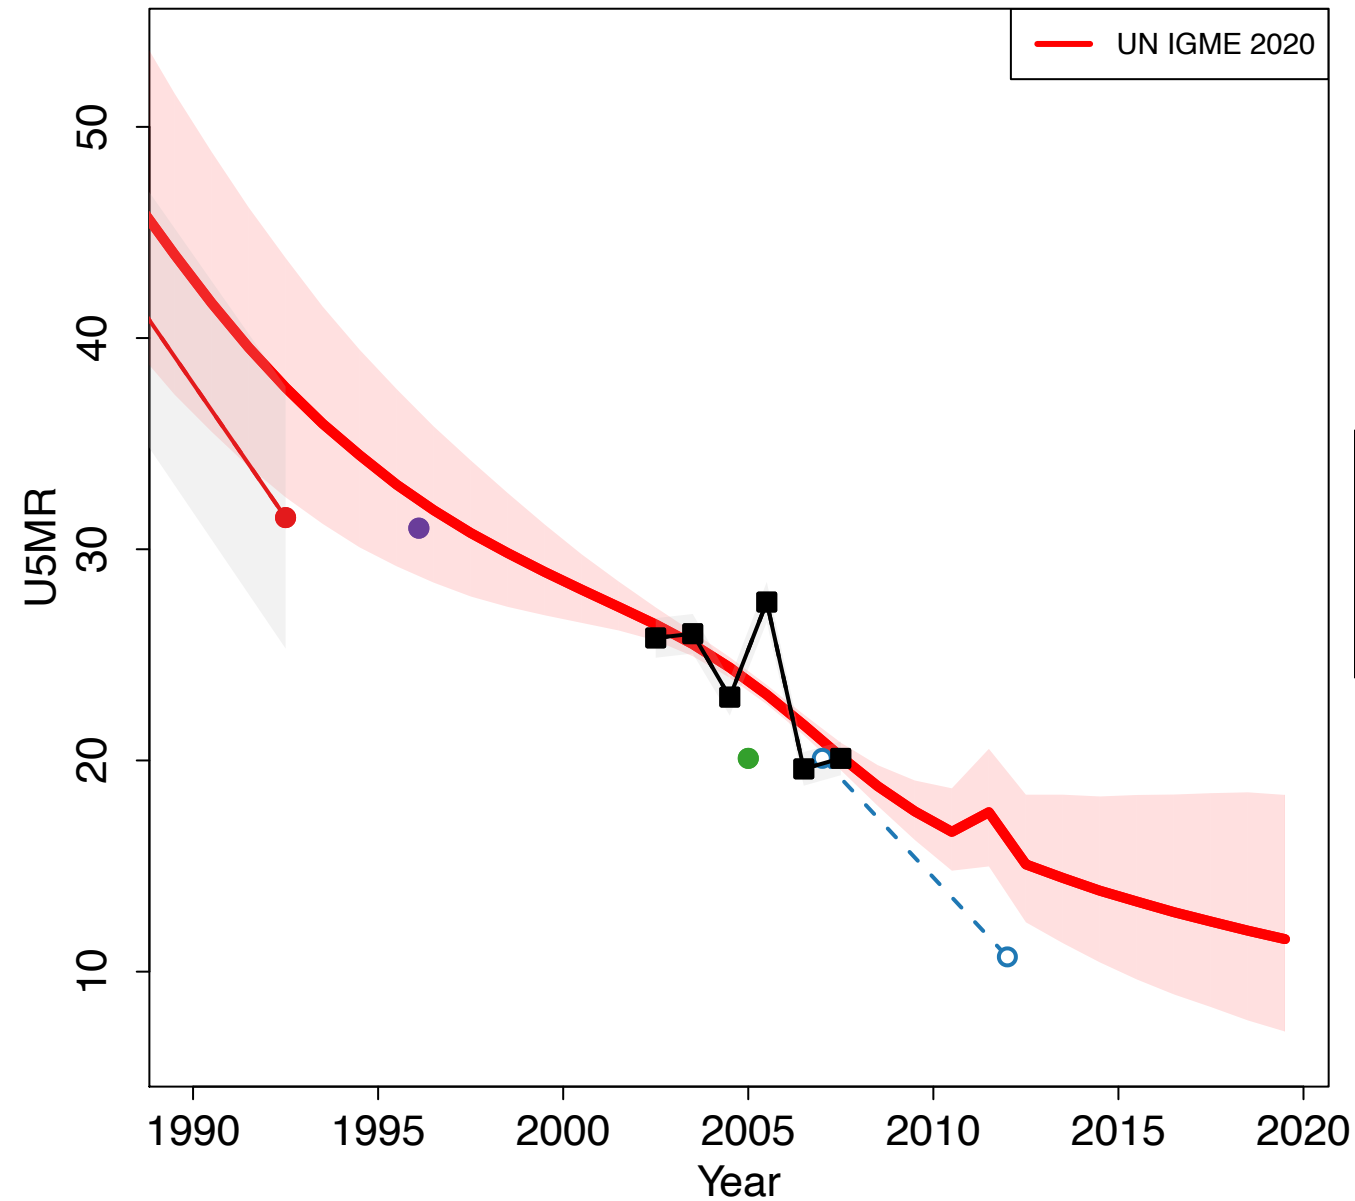

### Lithuania

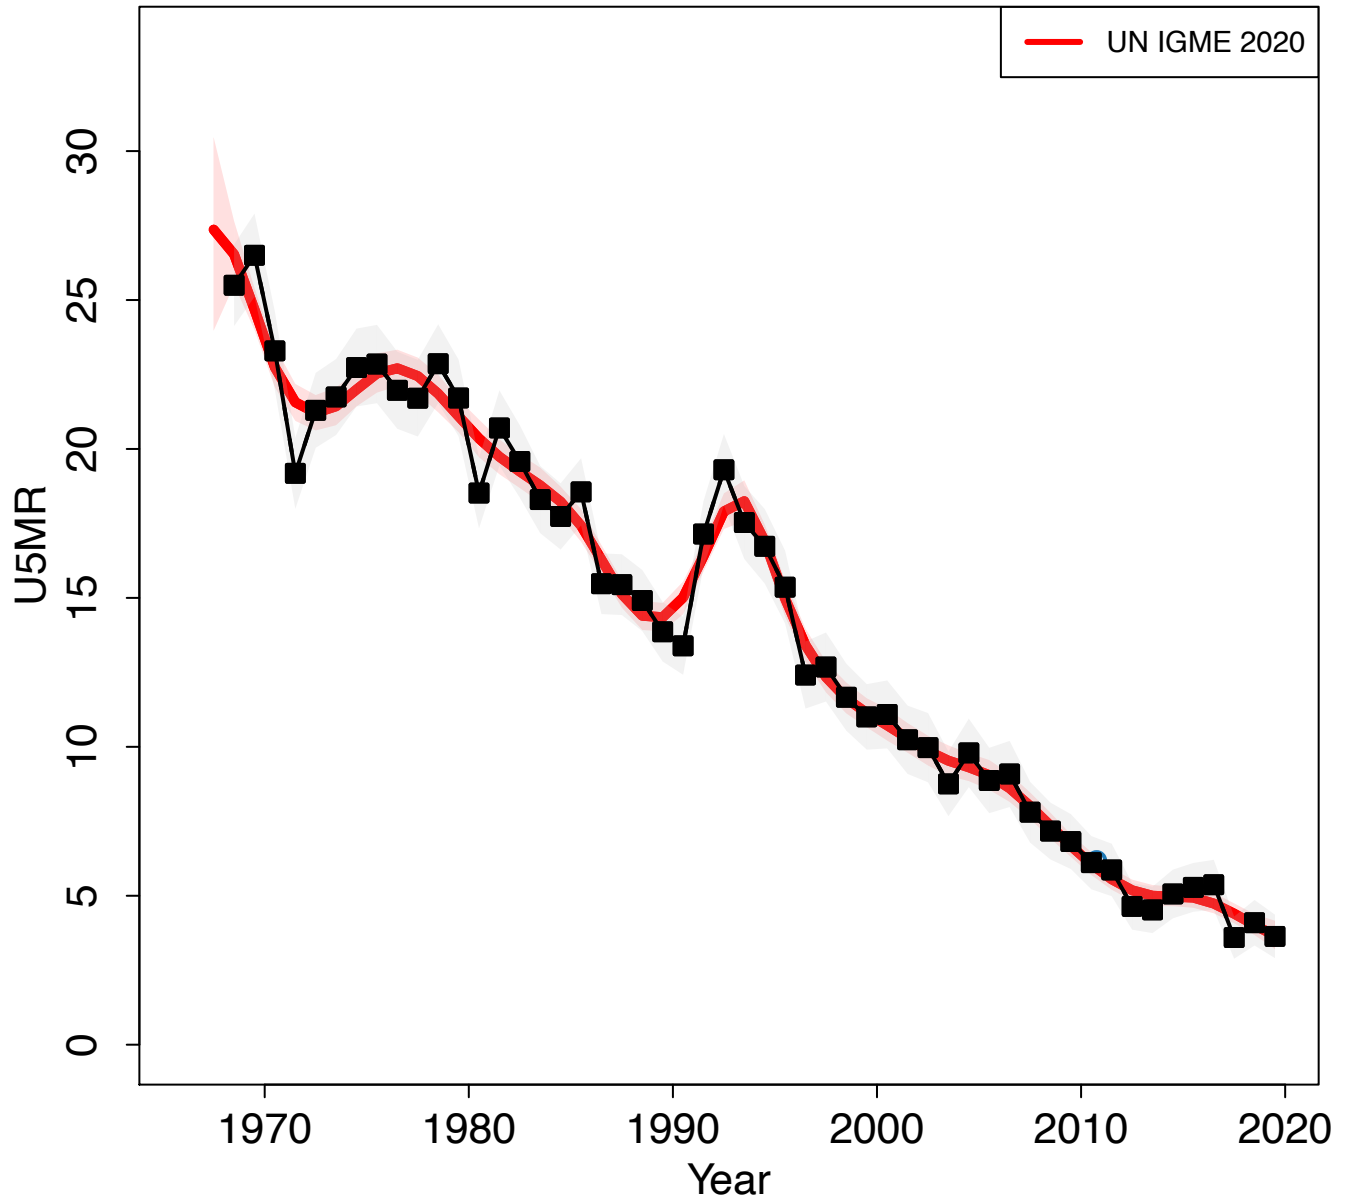

### Zoomed in

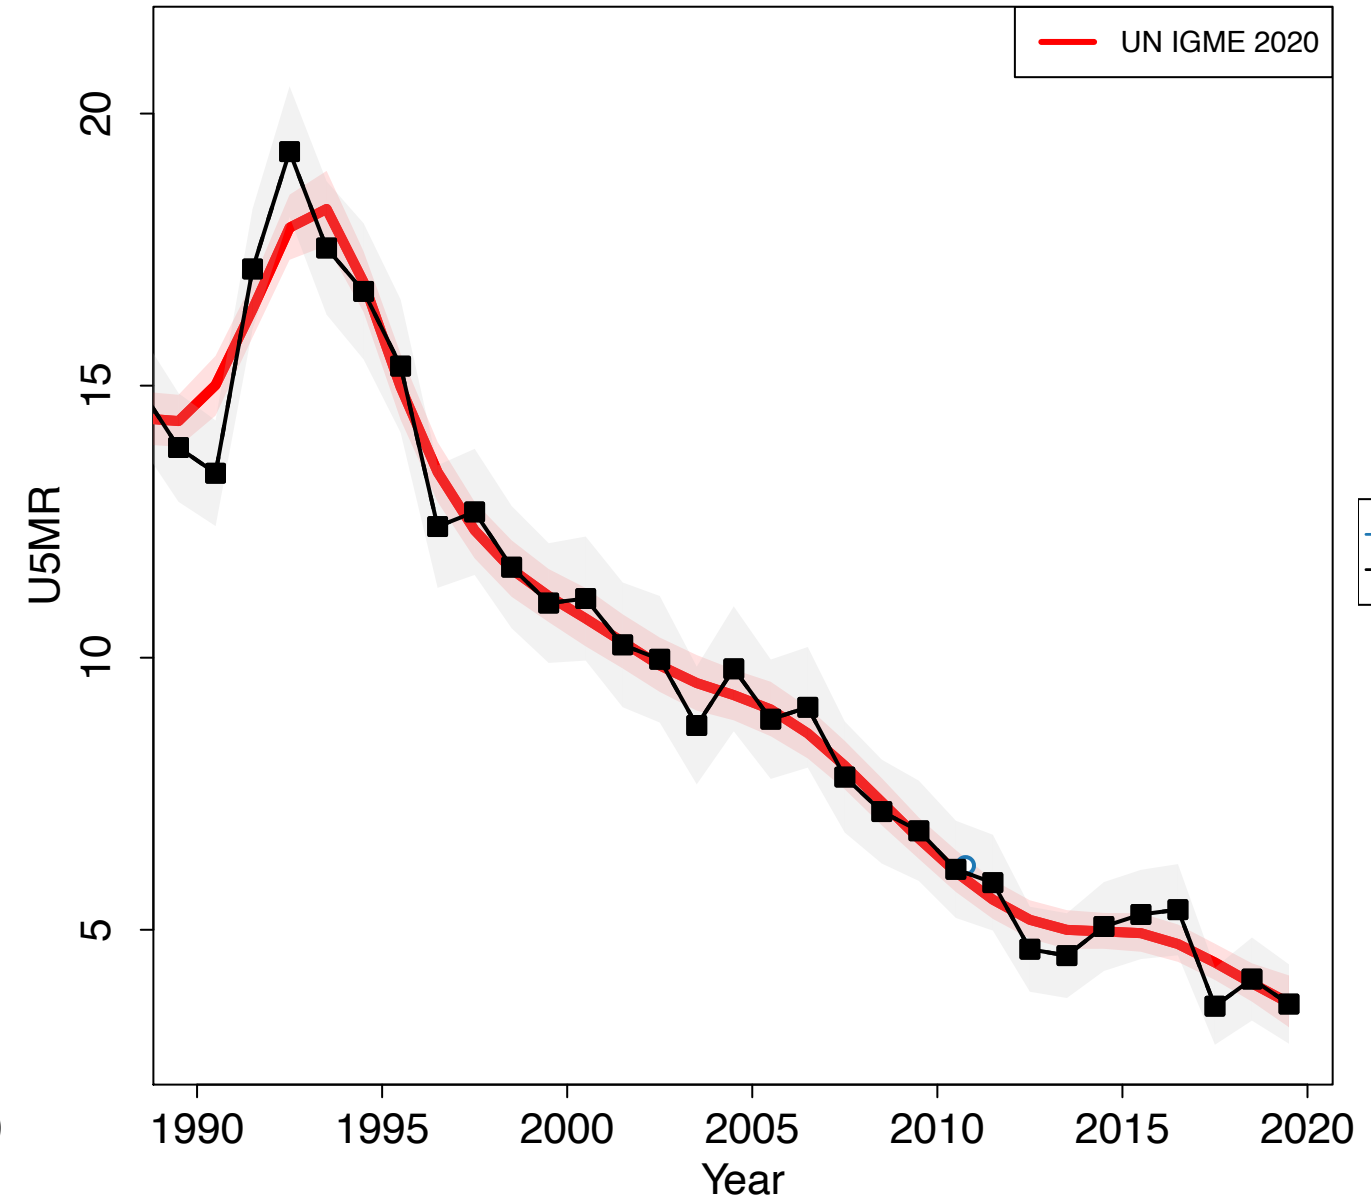

### Luxembourg

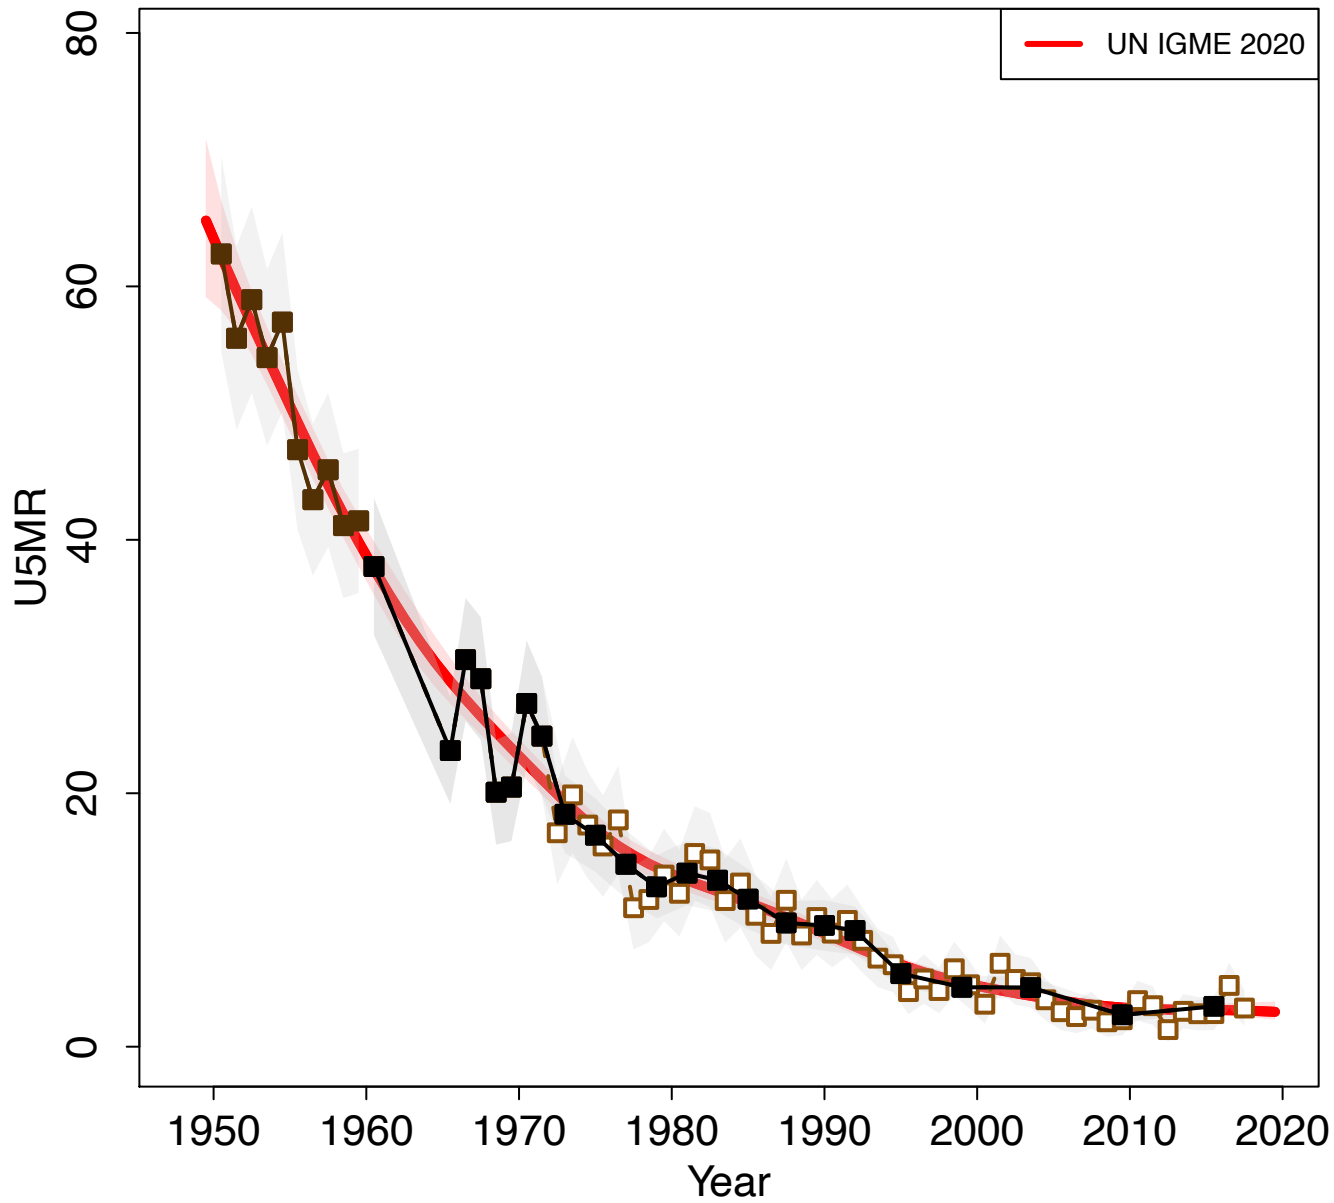

### Zoomed in

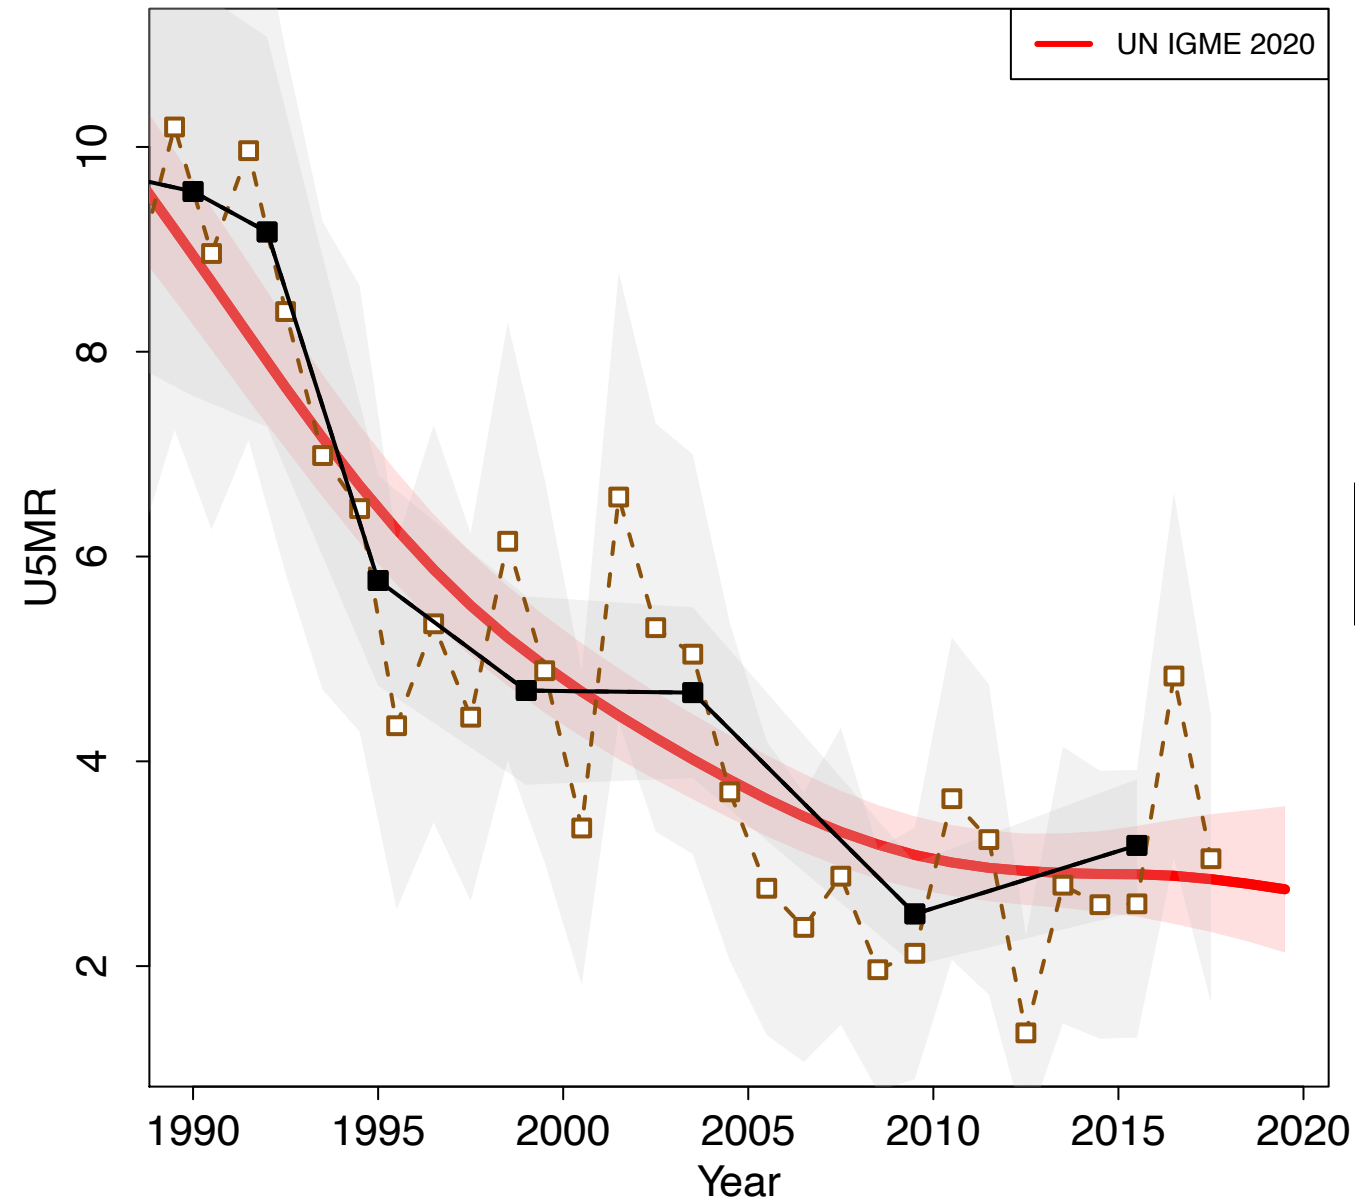

### Republic of North Macedonia

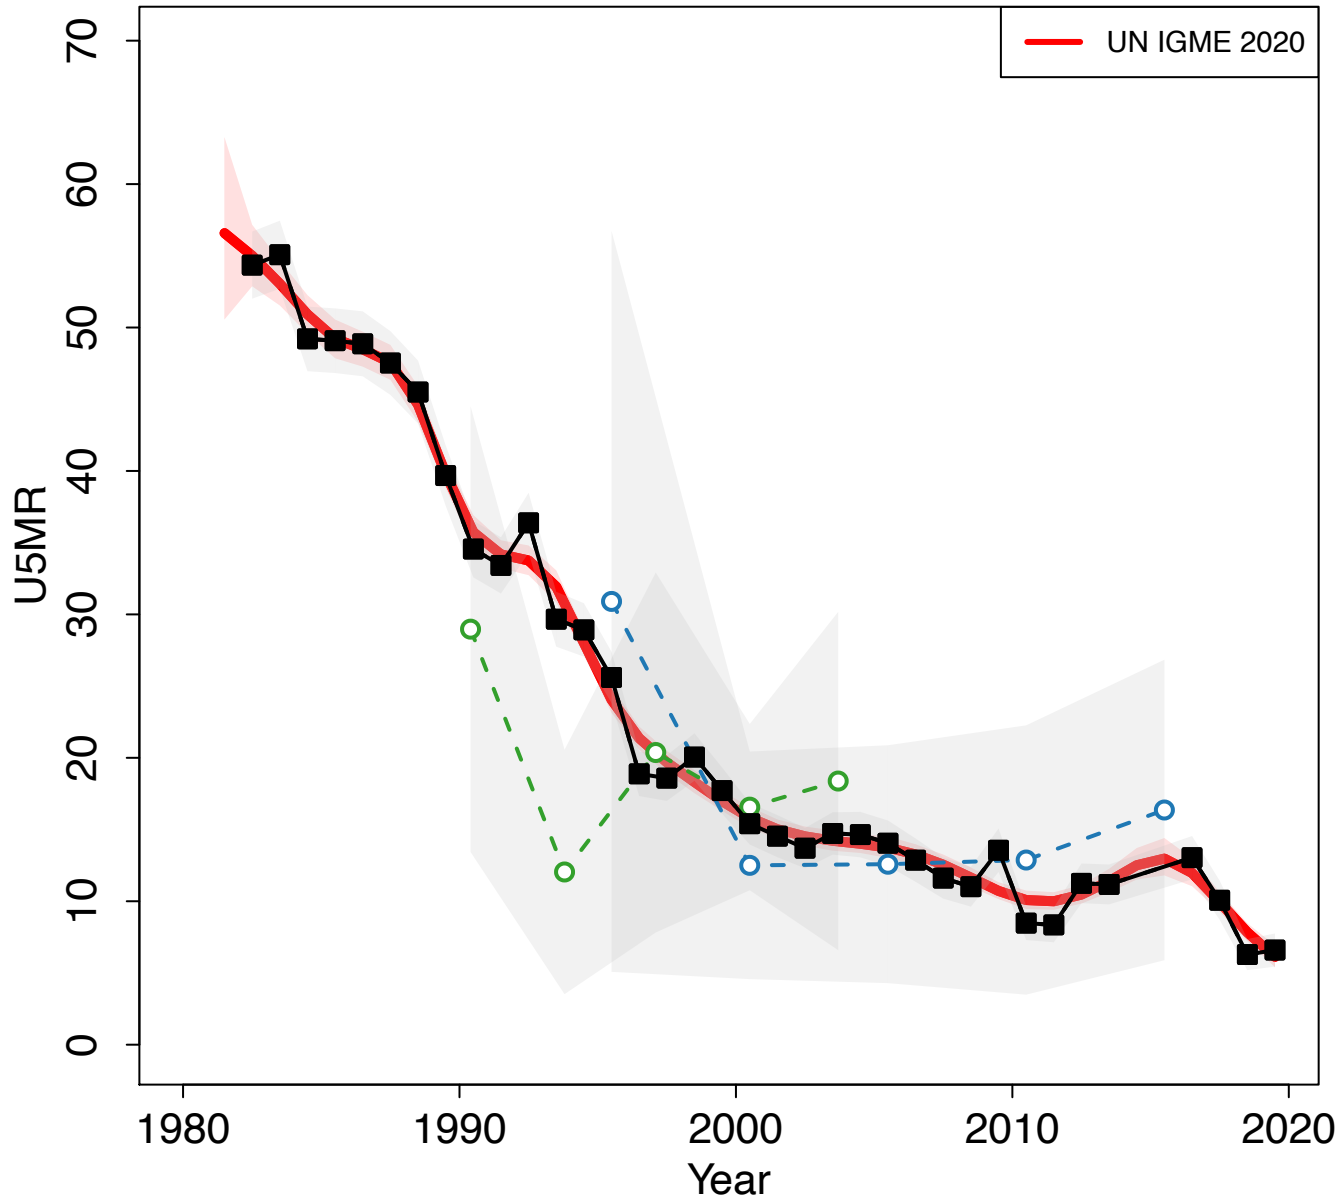

### Zoomed in

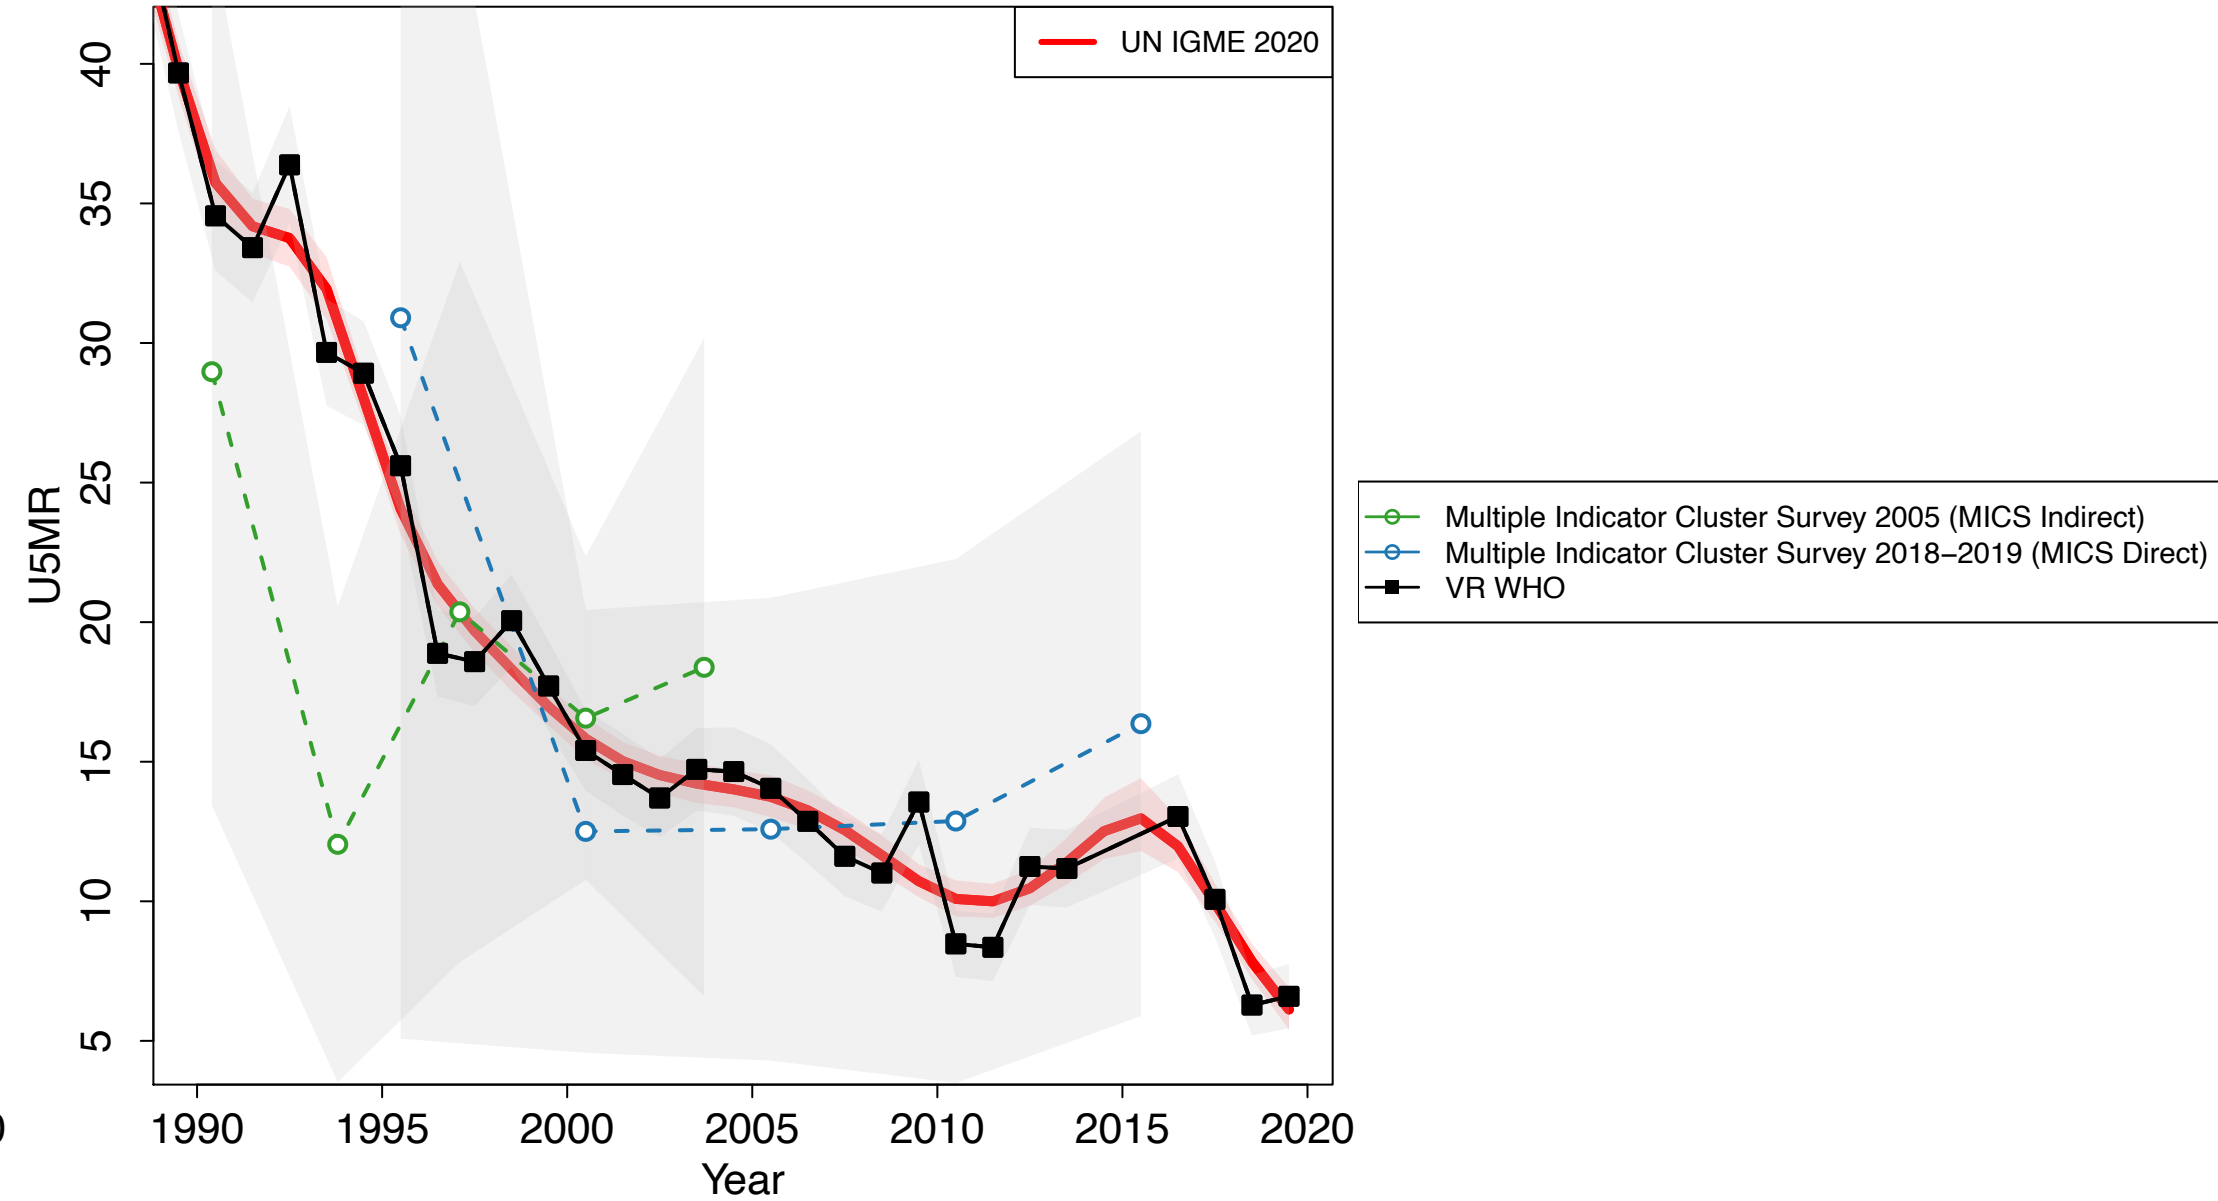



### Madagascar

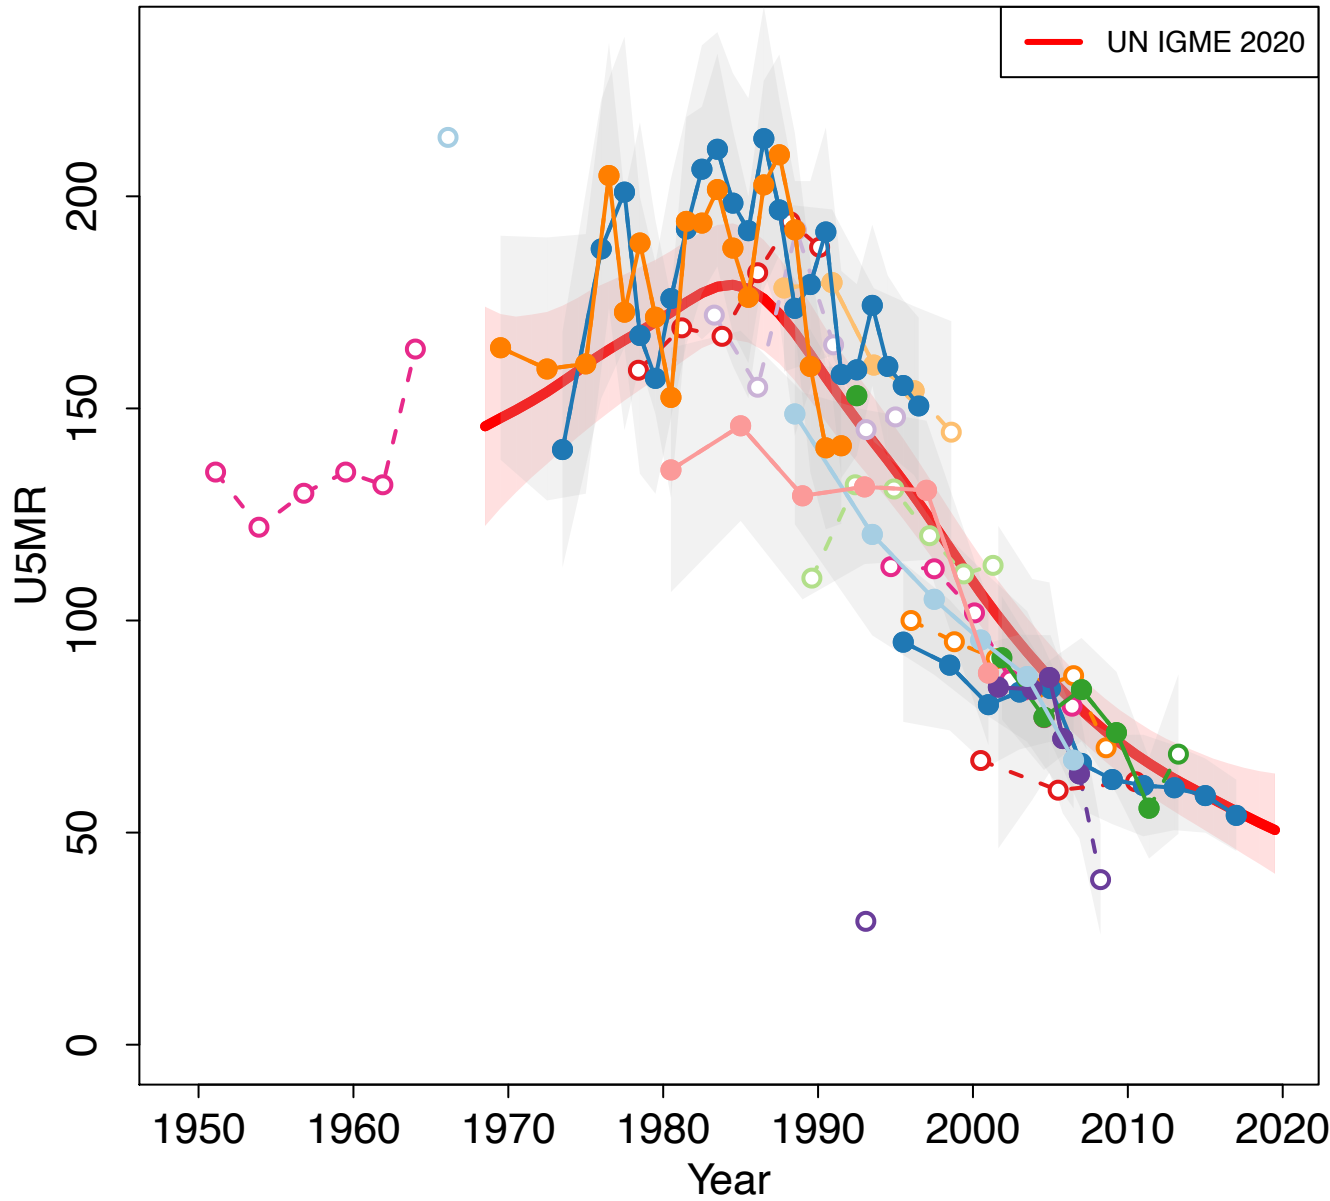

### Zoomed in

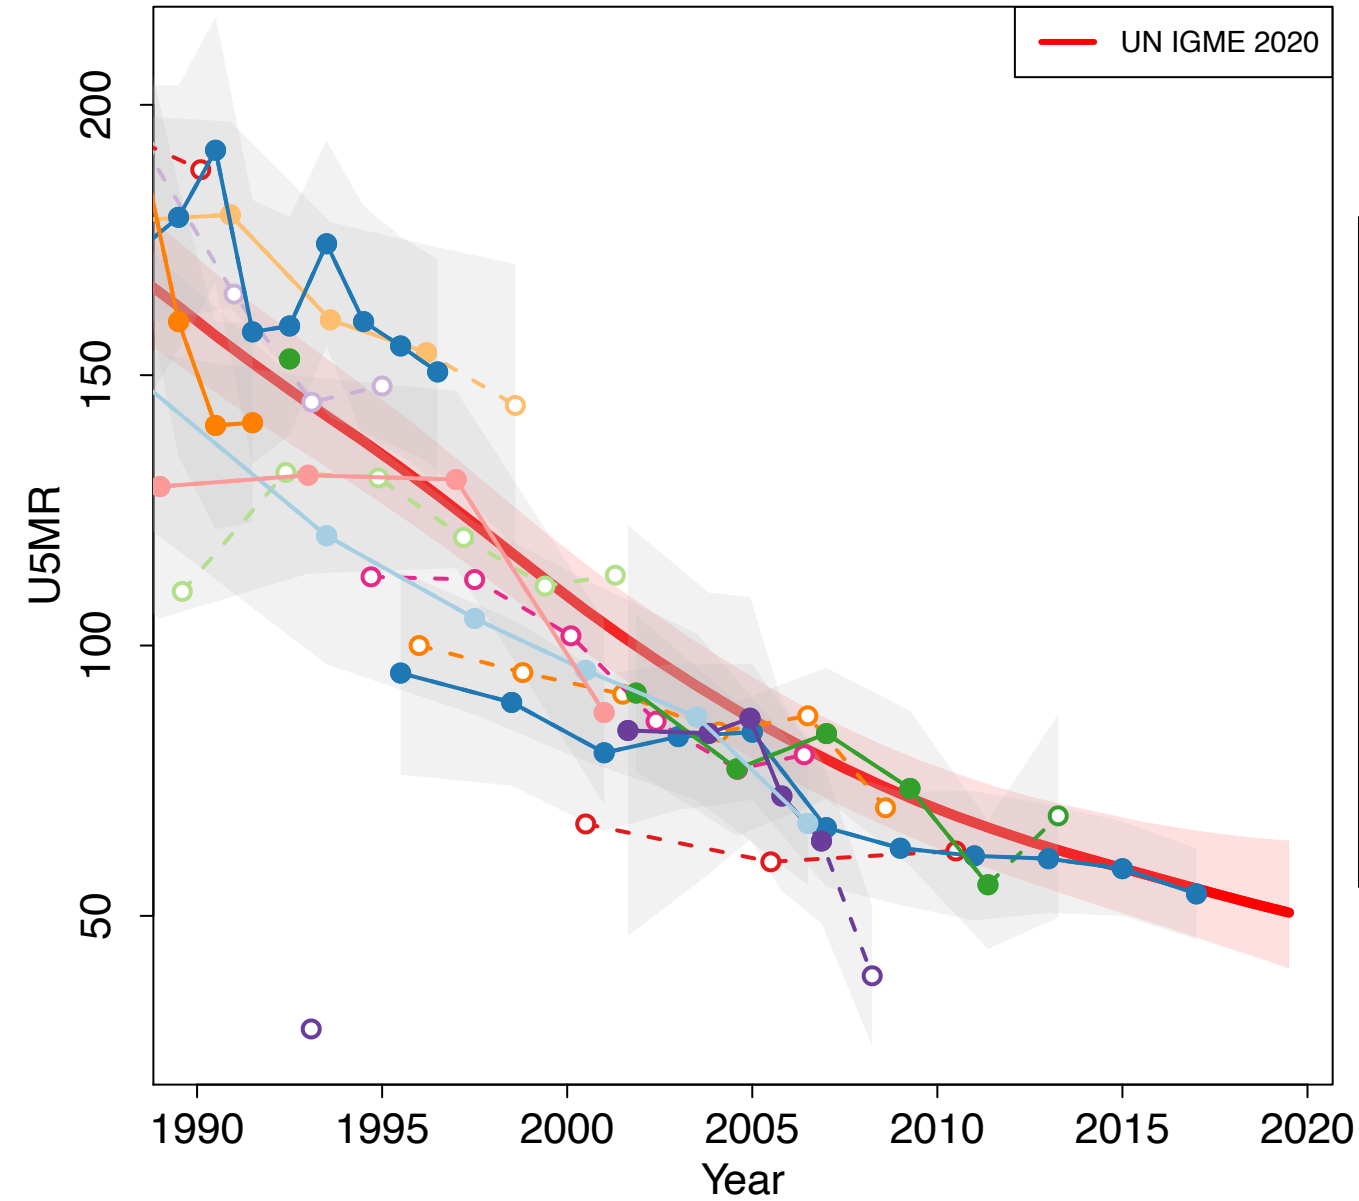

- Demographic Survey 1966 (Others Household Deaths)
- Madagascar Demographic Survey 1966 (Others Indirect)
- Demographic and Health Survey 1992 (DHS Direct)
- Demographic and Health Survey 1992 (DHS Indirect)
- Census 1993 (Others Household Deaths)
- Multiple Indicator Cluster Survey 1995 (Others Indirect)
- Demographic and Health Survey 1997 (DHS Direct)
- Demographic and Health Survey 1997 (DHS Indirect)
- Multiple Indicator Cluster Survey 2000 (MICS Indirect)
- Demographic and Health Survey 2003–2004 (DHS Direct)
- Demographic and Health Survey 2003–2004 (DHS Indirect)
- Demographic and Health Survey 2008–2009 (DHS Direct)
- Demographic and Health Survey 2008–2009 (DHS Indirect)
- Malaria Indicator Survey 2011 (Other DHS Indirect)
- National Survey on Monitoring the MDGs (ENSOMD) 2012–2013 (Others Direct)
- Malaria Indicator Survey 2013 (Other DHS Indirect)
- Malaria Indicator Survey 2016 (Other DHS Indirect)
- Multiple Indicator Cluster Survey 2018 (MICS Direct)

# Malawi

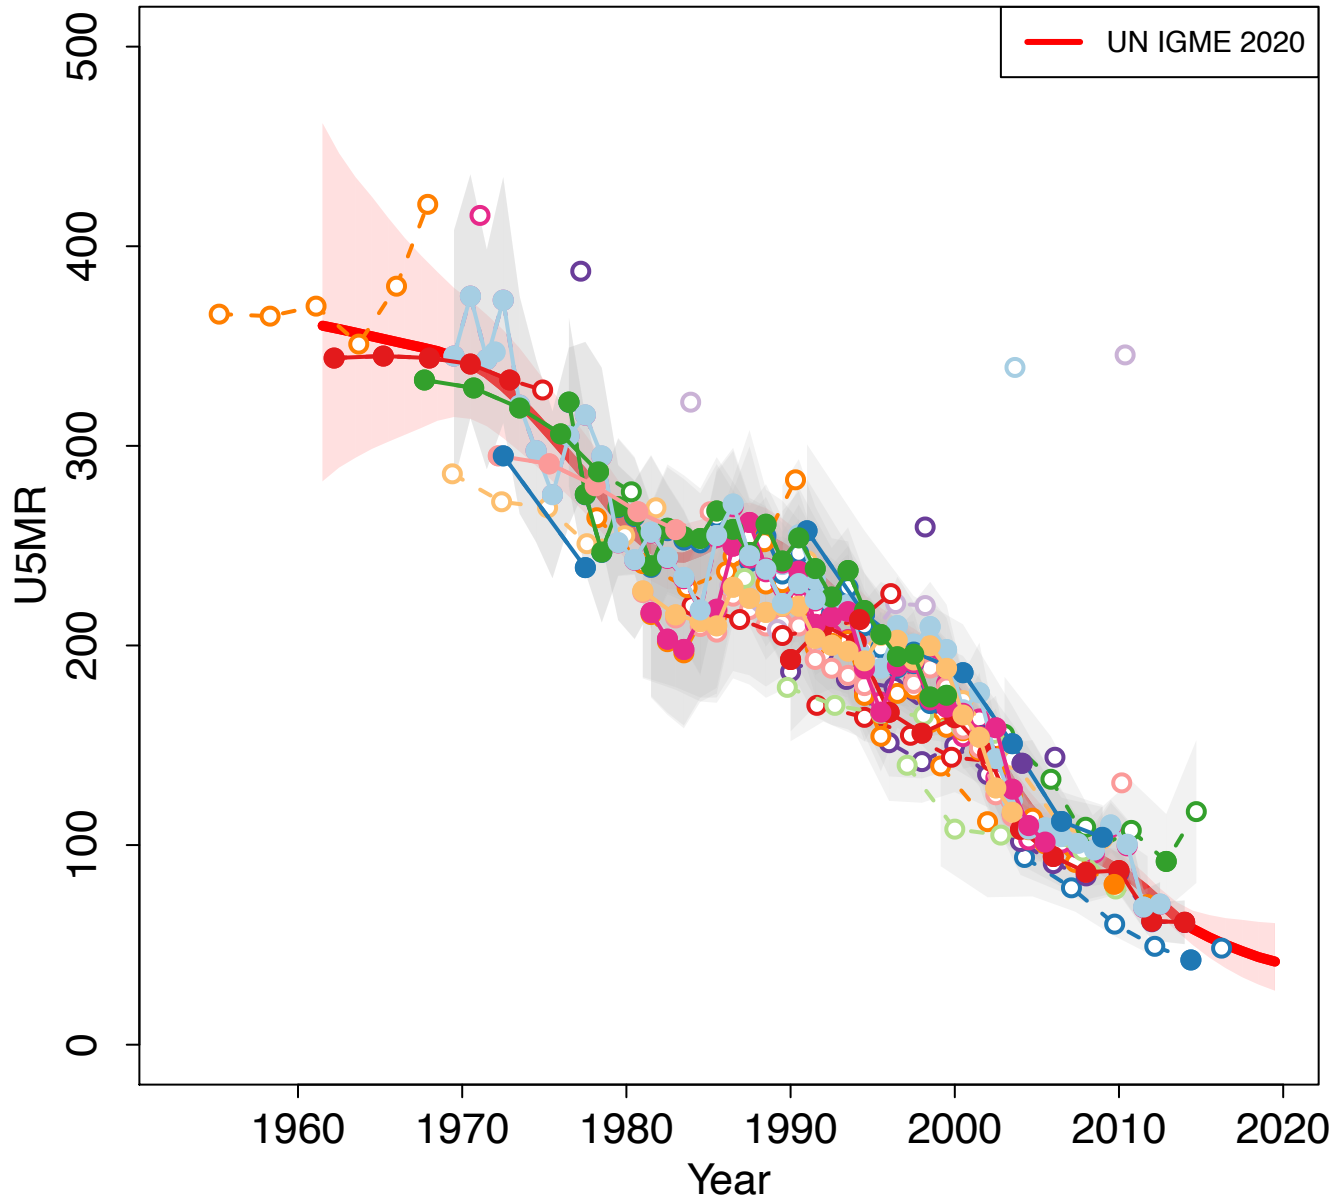

# Zoomed in

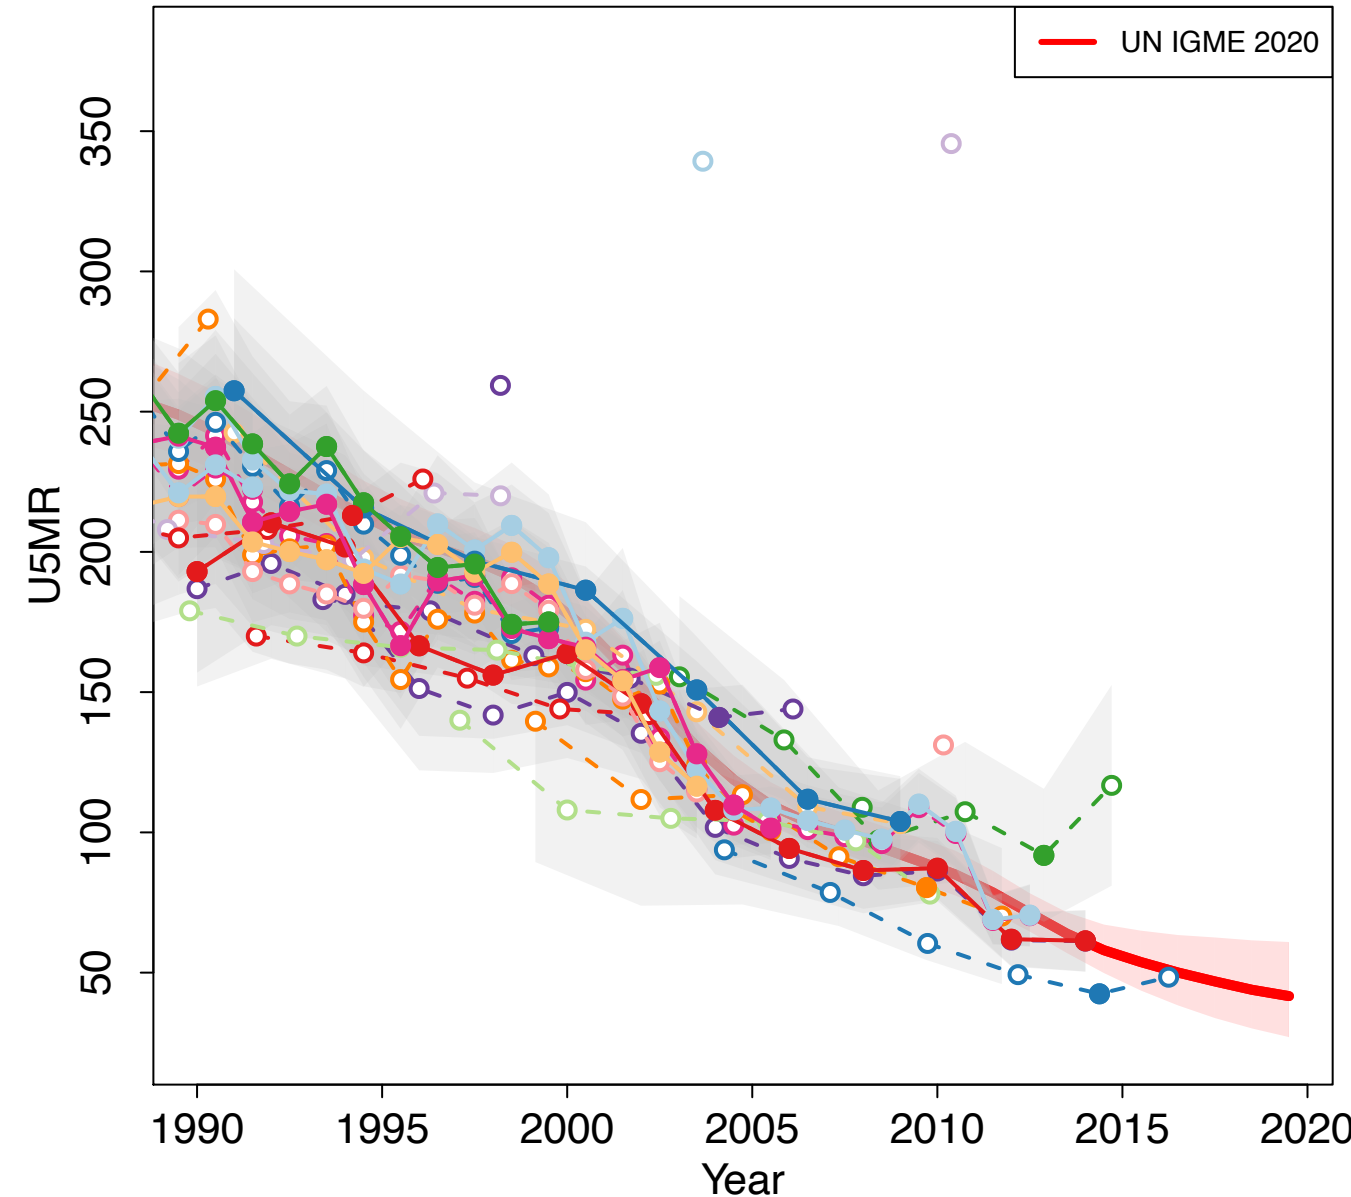

- Population Change Survey 1970–1972 (Others Direct)
- Population Change Survey 1970–1972 (Others Household Deaths)
- Population Change Survey 1970–1972 (Others Indirect)
- Census 1977 (Census Indirect)
- Census 1977 (Others Household Deaths)
- Demographic Survey 1982 (Others Indirect)
- Family Formation Survey 1984 (Others Direct)
- Family Formation Survey 1984 (Others Household Deaths)
- Family Formation Survey 1984 (Others Indirect)
- Census 1987 (Census Indirect)
- Census 1987 (Others Household Deaths)
- Demographic and Health Survey (MM adjusted) 1992 (DHS Direct)
- Demographic and Health Survey 1992 (DHS Direct)
- Demographic and Health Survey 1992 (DHS Indirect)
- Census 1998 (Census Indirect)
- Census 1998 (Others Household Deaths)
- Demographic and Health Survey (MM adjusted) 2000 (DHS Direct)
- Demographic and Health Survey 2000 (DHS Direct)
- Demographic and Health Survey 2000 (DHS Indirect)
- Demographic and Health Survey (MM adjusted) 2004 (DHS Direct)
- Demographic and Health Survey 2004 (DHS Direct)
- Demographic and Health Survey 2004 (DHS Indirect)
- Second Integrated Household Survey 2004–2005 (Others Household Deaths)
- Multiple Indicator Cluster Survey (MM adjusted) 2006 (MICS Direct)
- Multiple Indicator Cluster Survey 2006 (MICS Direct)
- Multiple Indicator Cluster Survey 2006 (Others Indirect)
- Census 2008 (Census Indirect)
- Census 2008 (Others Household Deaths)
- Demographic and Health Survey (MM adjusted) 2010 (DHS Direct)
- Third Integrated Household Survey 2010–2011 (Others Household Deaths)
- Demographic and Health Survey 2010 (DHS Direct)
- Demographic and Health Survey 2010 (Others Household Deaths)
- Malaria Indicator Survey 2012 (Other DHS Indirect)
- MDG Endline Survey (MM adjusted) 2013–2014 (MICS Direct)
- MDG Endline Survey 2013–2014 (MICS Direct)
- Malaria Indicator Survey 2014 (Other DHS Indirect)
- Demographic and Health Survey (MM adjusted) 2015–2016 (DHS Direct)
- Demographic and Health Survey 2015–2016 (DHS Direct)
- Malaria Indicator Survey 2017 (Other DHS Indirect)
- Census 2018 (Census Indirect)

# Malaysia

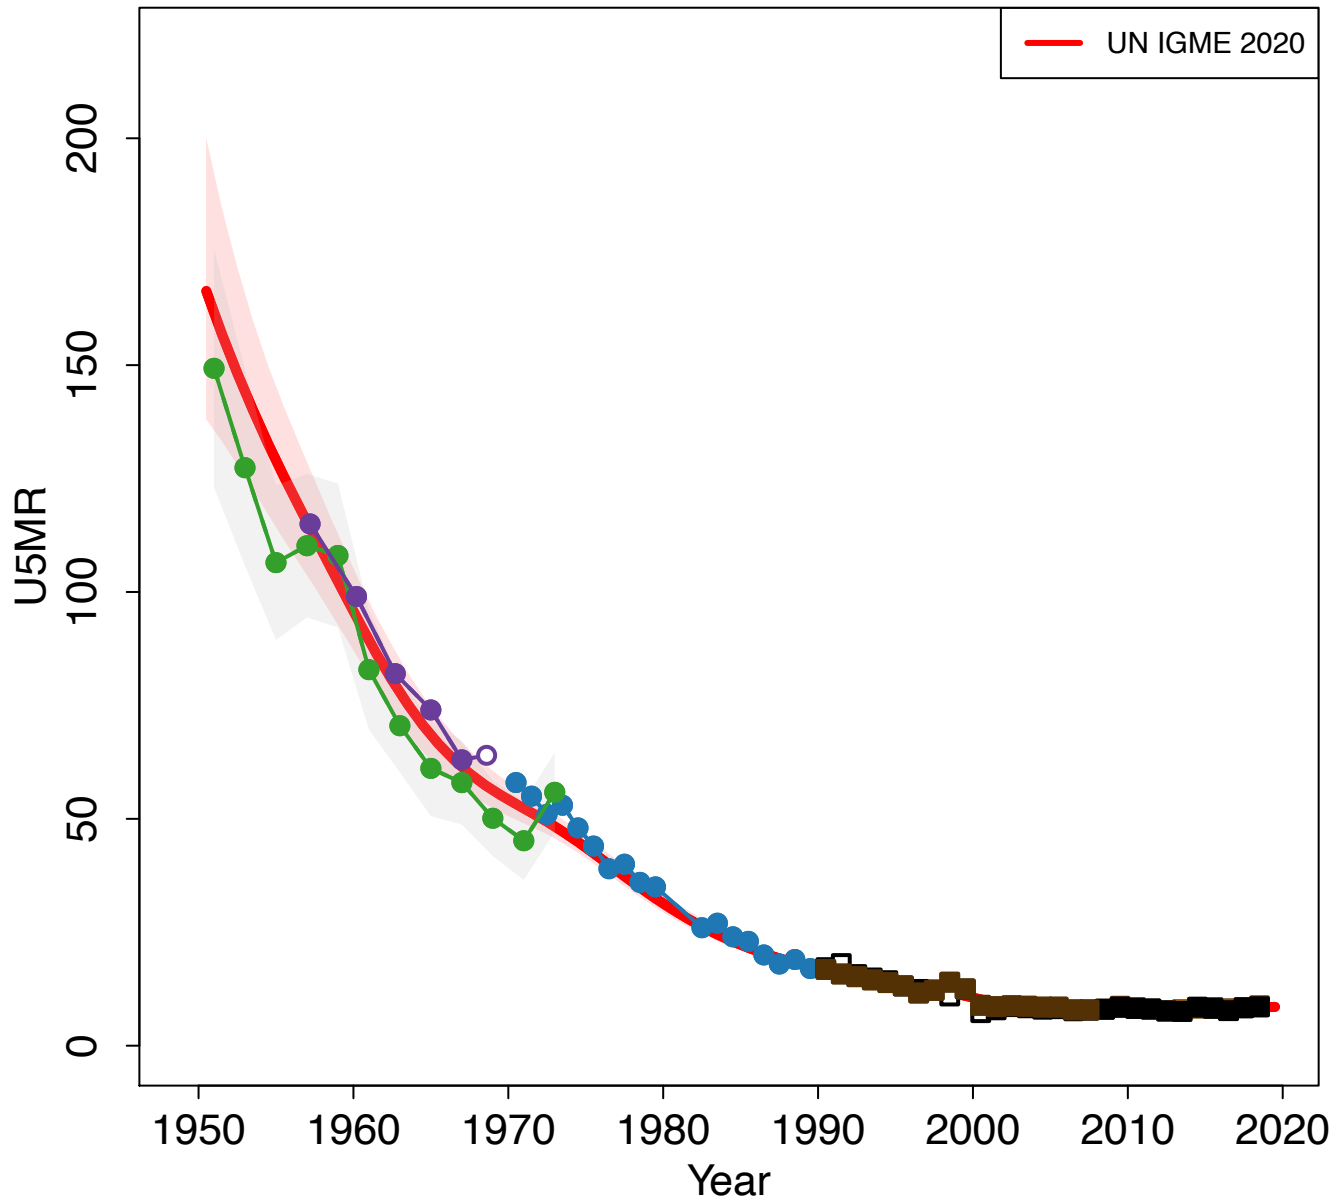

# Zoomed in

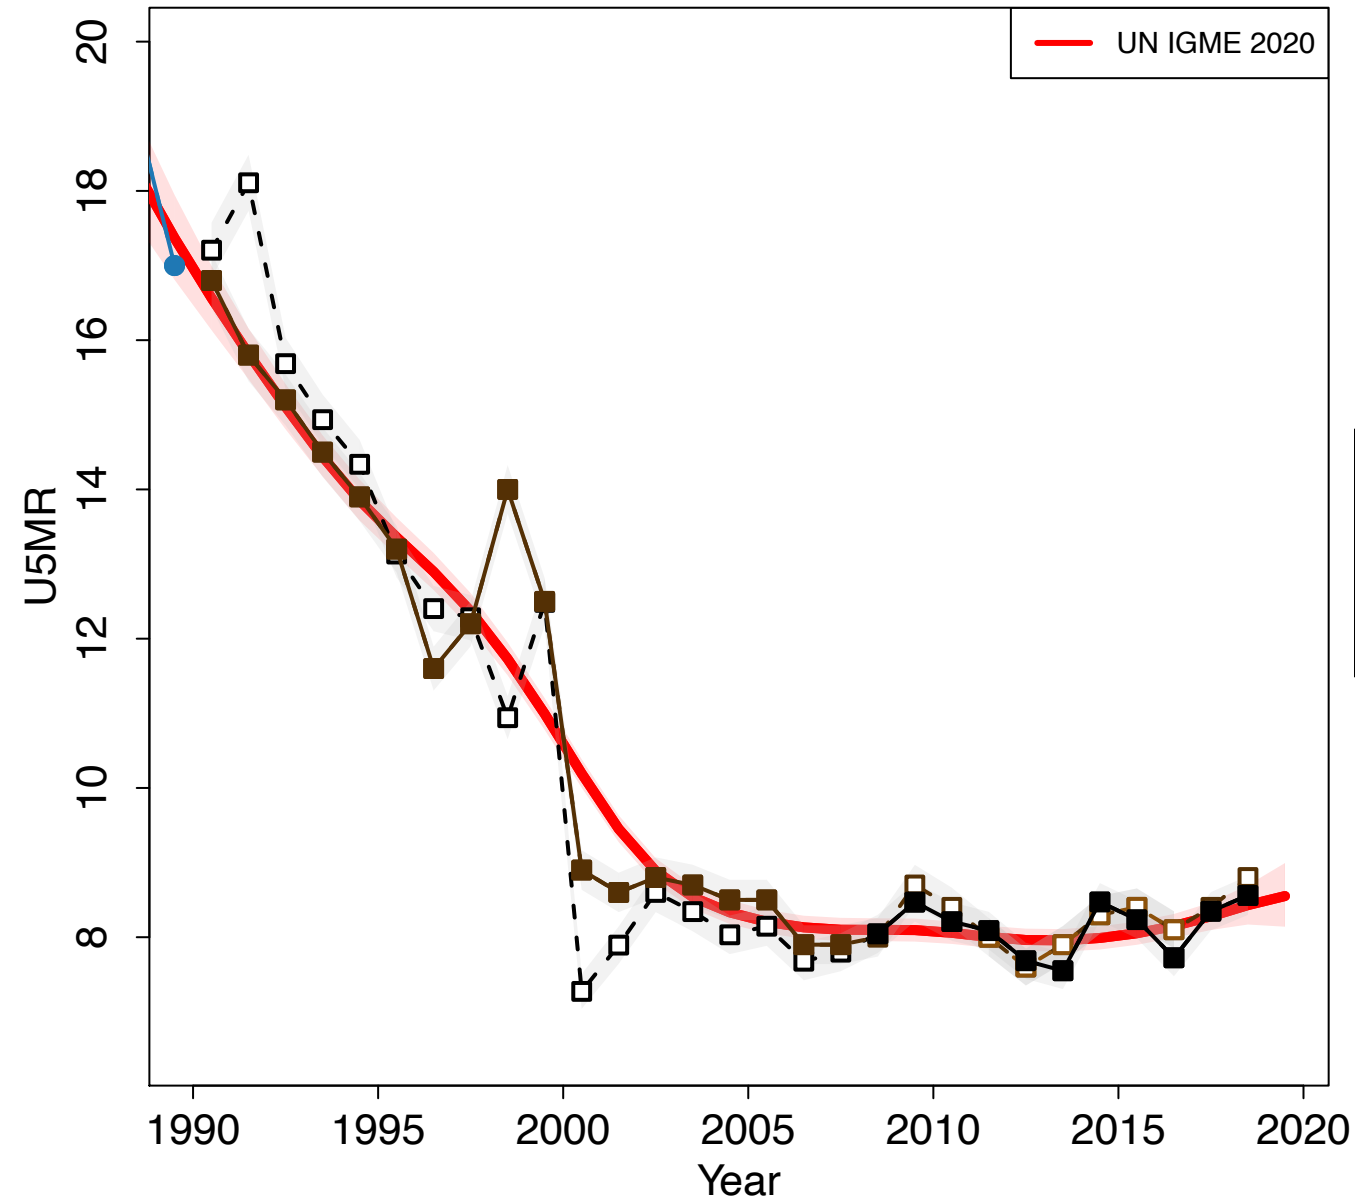

### Maldives

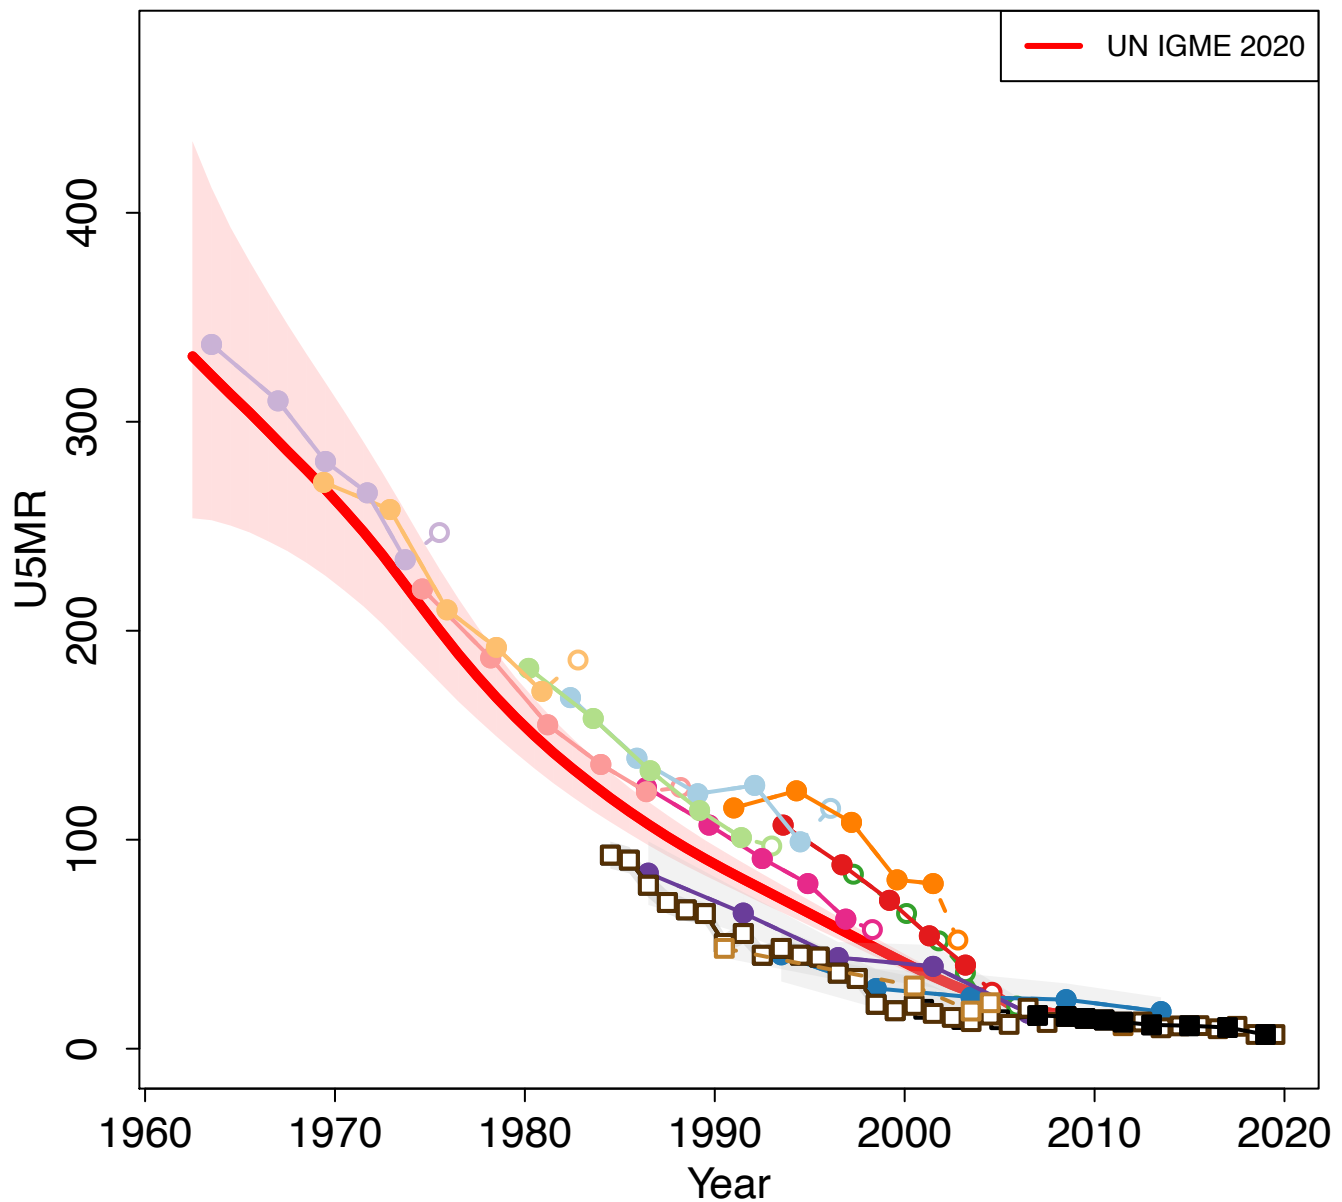

### Zoomed in

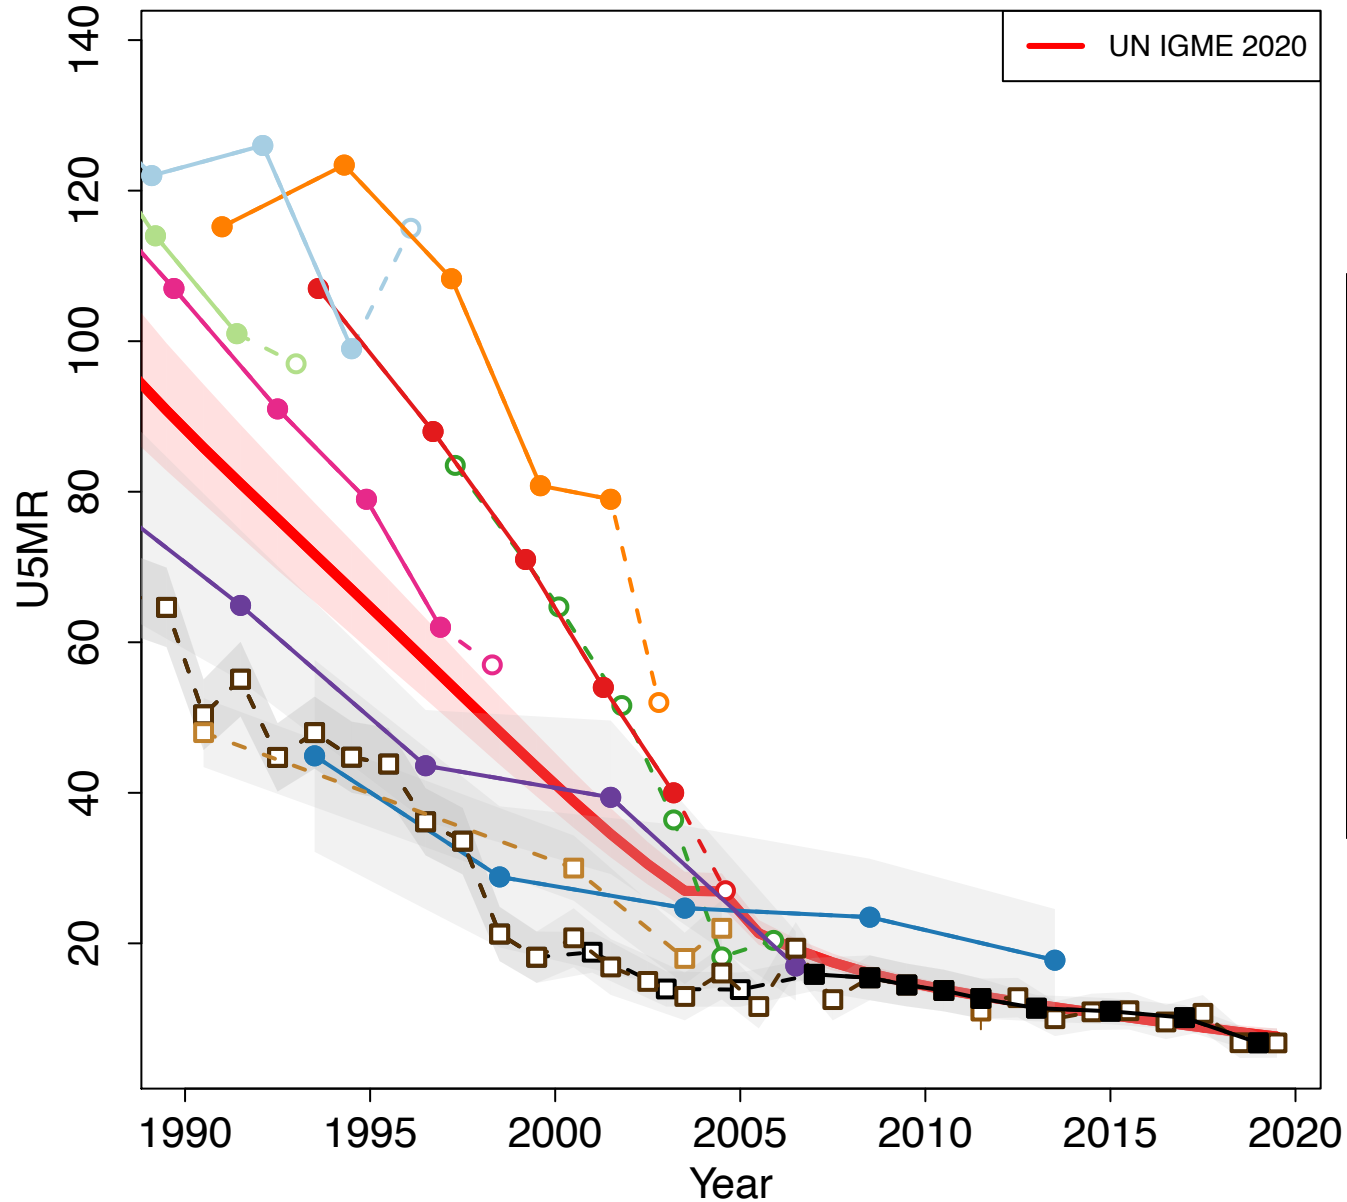

- Census 1977 (Census Indirect)
- Census 1985 (Census Indirect)
- Census 1990 (Census Indirect)
- Census 1995 (Census Indirect)
- Poverty and Vulnerability Survey 1997 (Others Indirect)
- Census 2000 (Census Indirect)
- Vulnerability and Poverty Assessment 2004 (Others Indirect)
- Census 2006 (Census Indirect)
- Demographic and Health Survey 2009 (DHS Direct)
- Demographic and Health Survey 2009 (DHS Indirect)
- Demographic and Health Survey 2016–2017 (DHS Direct)
- VR Vital Registration data from Statistical Yearbook of Maldives 2005 version
- VR Vital Statistics
- VR WHO
- VR WHO (Recalculated)

### Mali

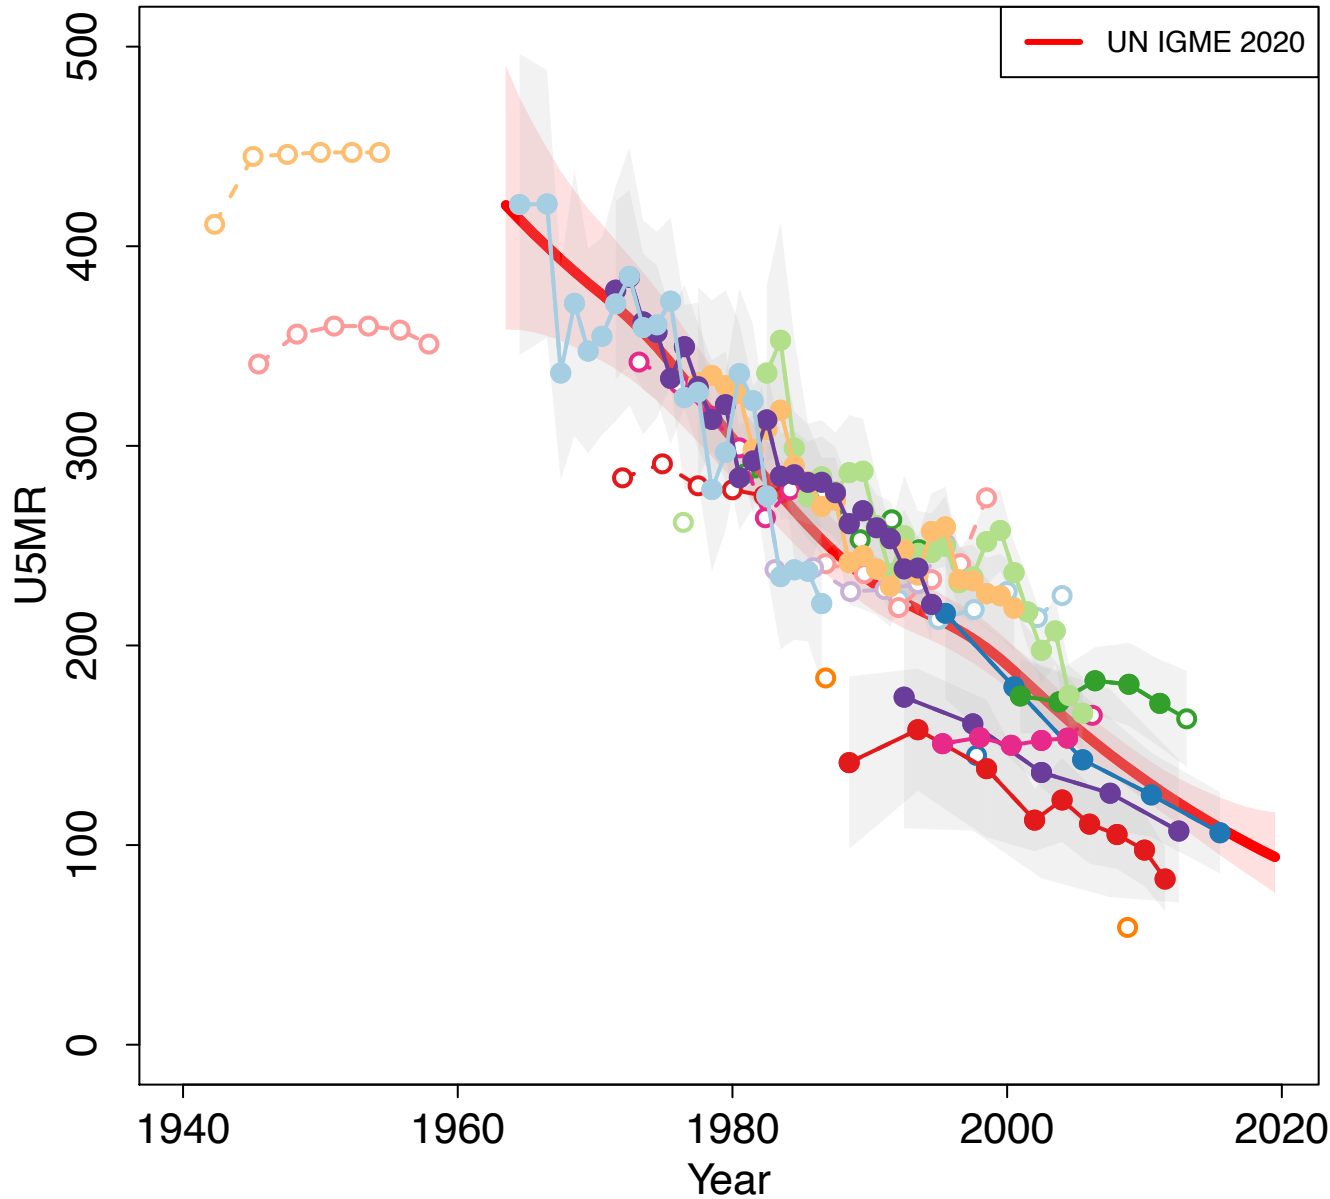

### Zoomed in

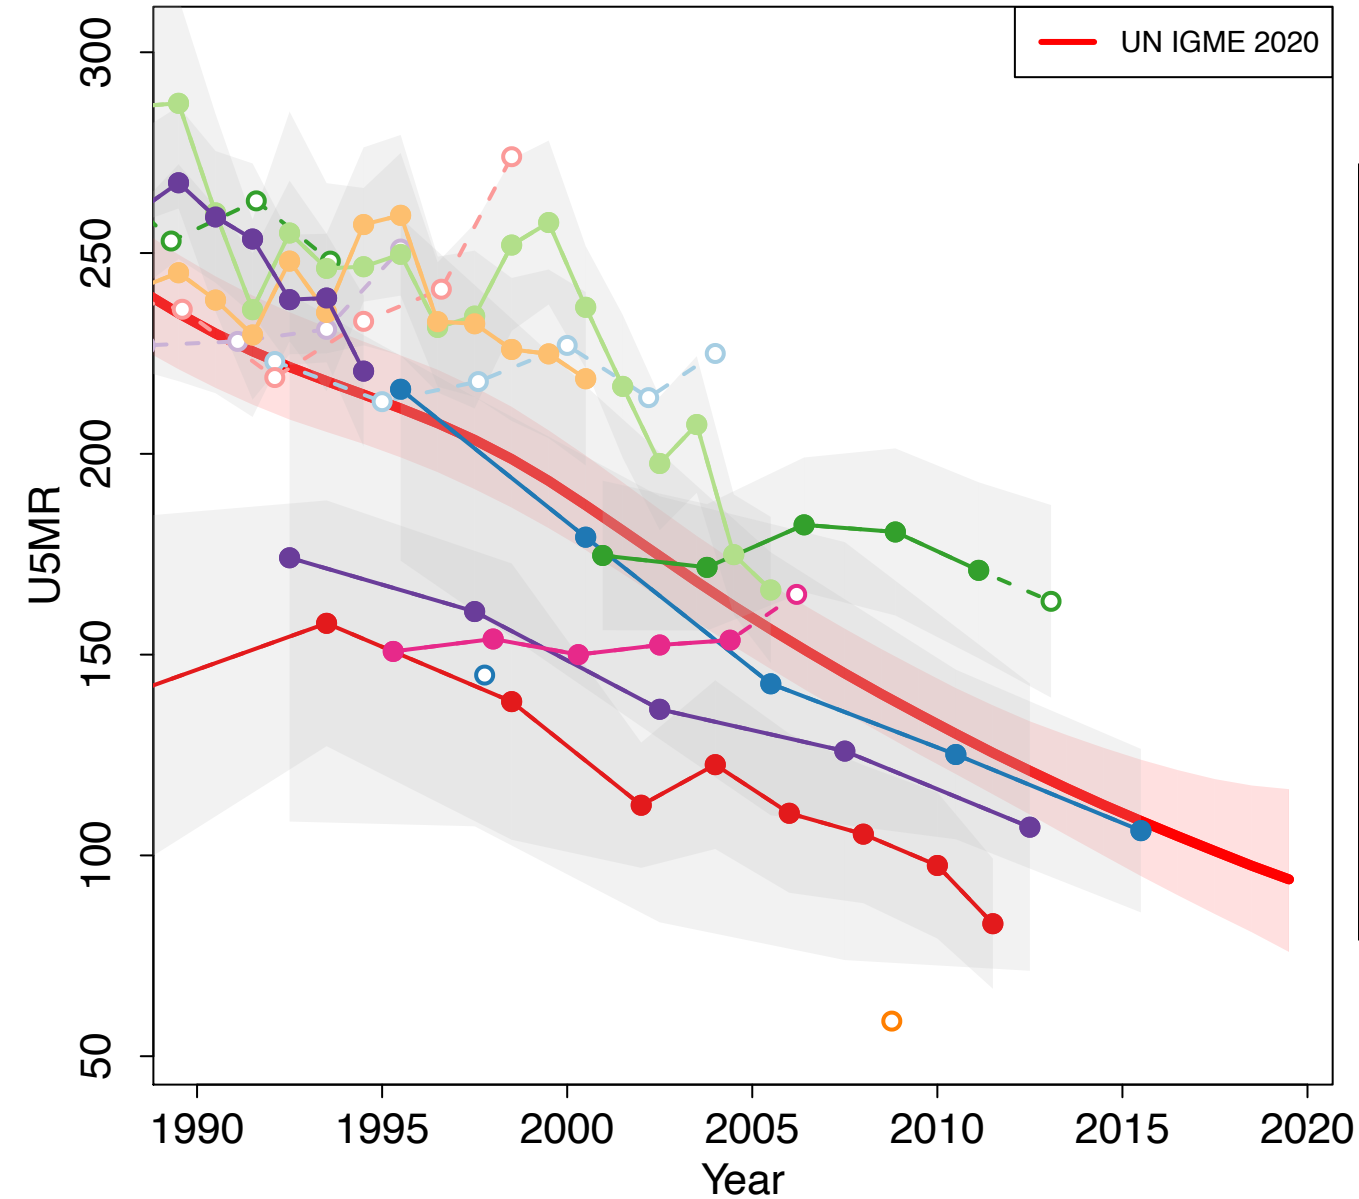

- Survey 1957 (Others Indirect)
- Survey 1960.5 (Others Indirect)
- Census 1976 (Others Household Deaths)
- Demographic and Health Survey 1987 (DHS Direct)
- Demographic and Health Survey 1987 (DHS Indirect)
- Census 1987 (Others Household Deaths)
- Census 1987 (Census Indirect)
- Demographic and Health Survey 1995–1996 (DHS Direct)
- Demographic and Health Survey 1995–1996 (DHS Indirect)
- Census 1998 (Others Household Deaths)
- Census 1998 (Census Indirect)
- Demographic and Health Survey 2001 (DHS Direct)
- Demographic and Health Survey 2001 (DHS Indirect)
- Demographic and Health Survey 2006 (DHS Direct)
- Demographic and Health Survey 2006 (DHS Indirect)
- Census 2009 (Census Indirect)
- Census 2009 (Others Household Deaths)
- Demographic and Health Survey 2012–2013 (DHS Direct)
- Multiple Indicator Cluster Survey 2015 (MICS Direct)
- Malaria Indicator Survey 2015 (Other DHS Indirect)
- Demographic and Health Survey 2018 (DHS Direct)

### Malta

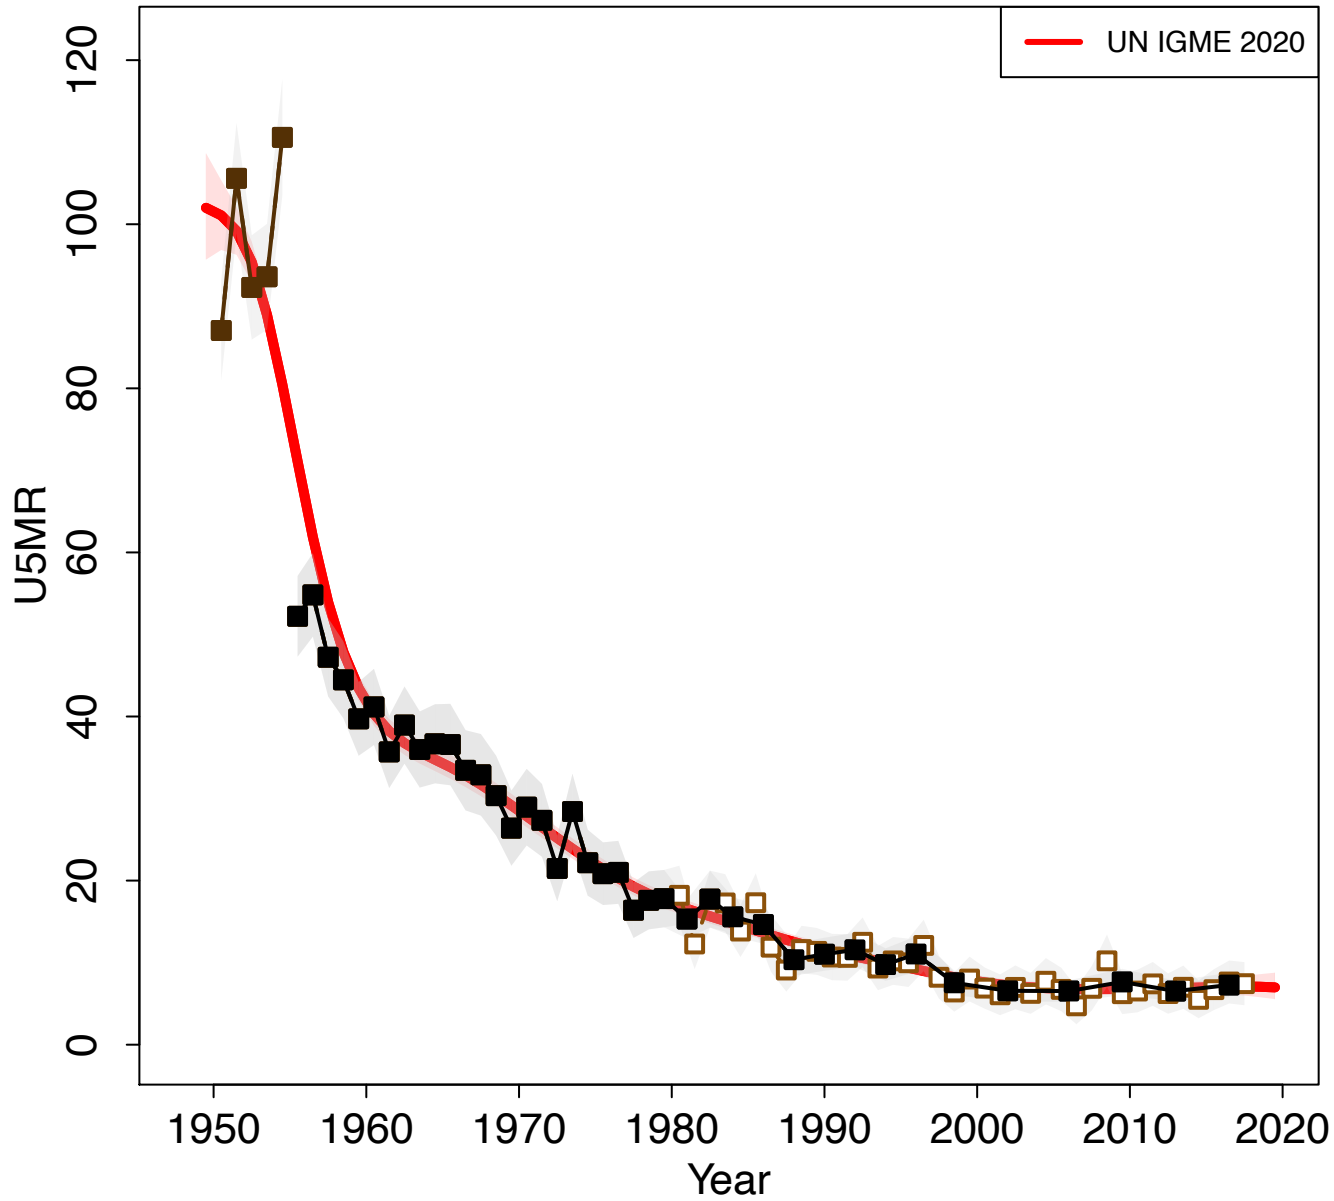

### Zoomed in

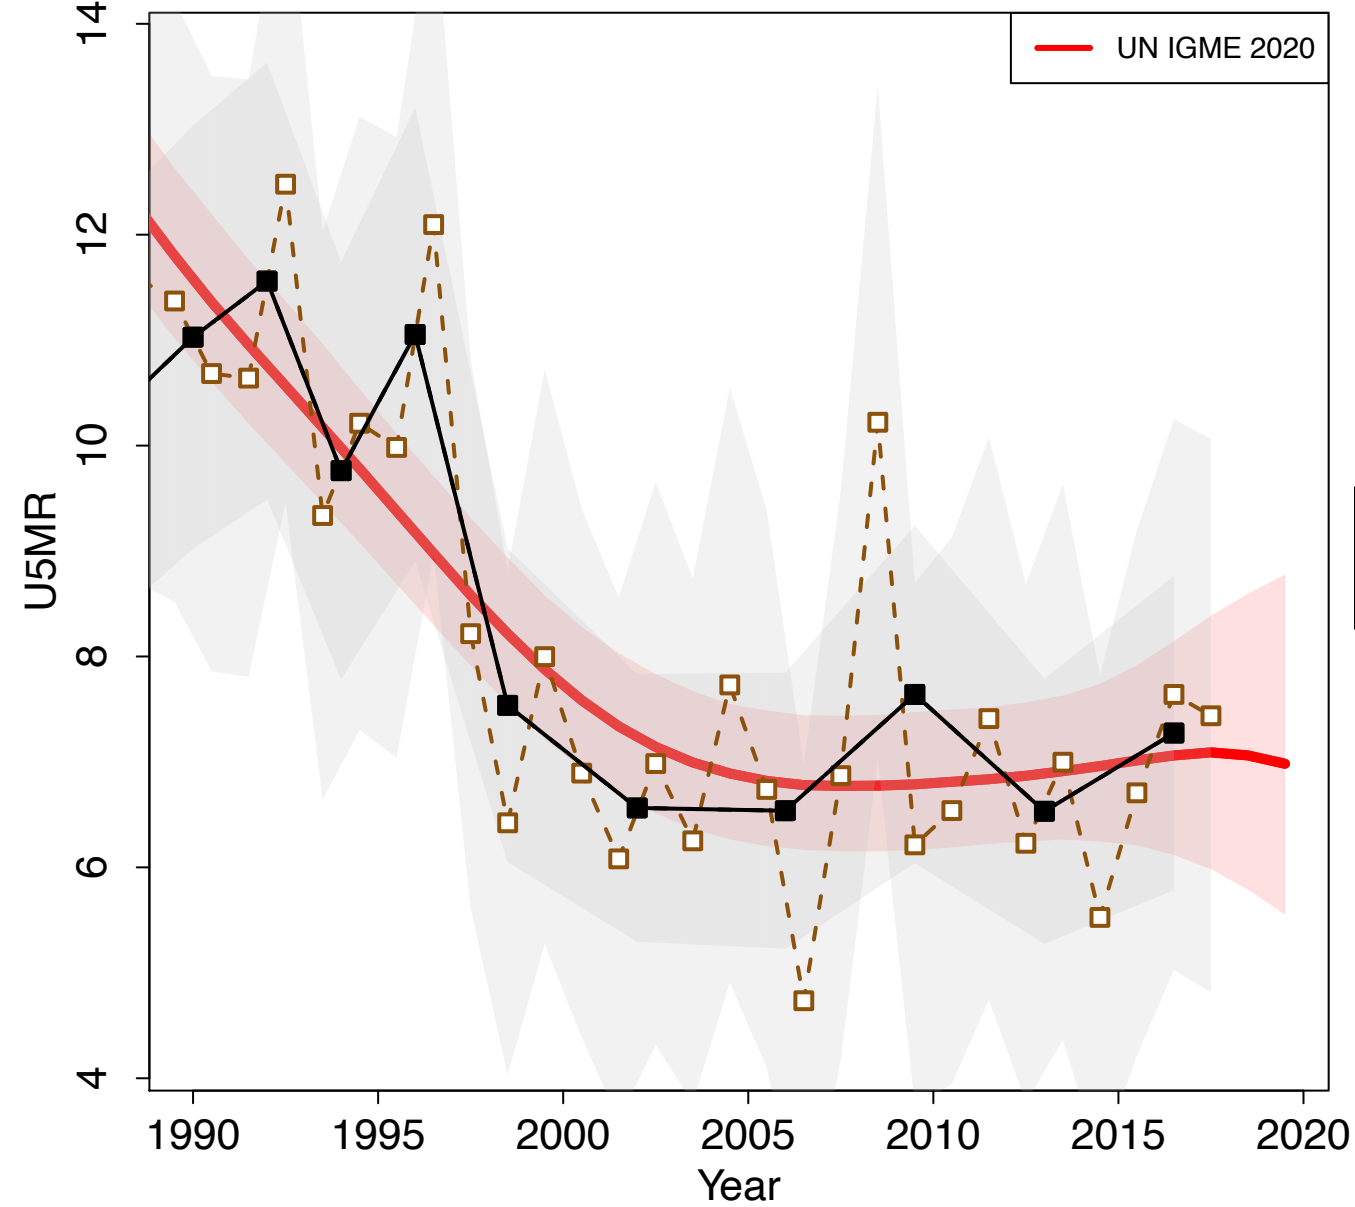

### Marshall Islands

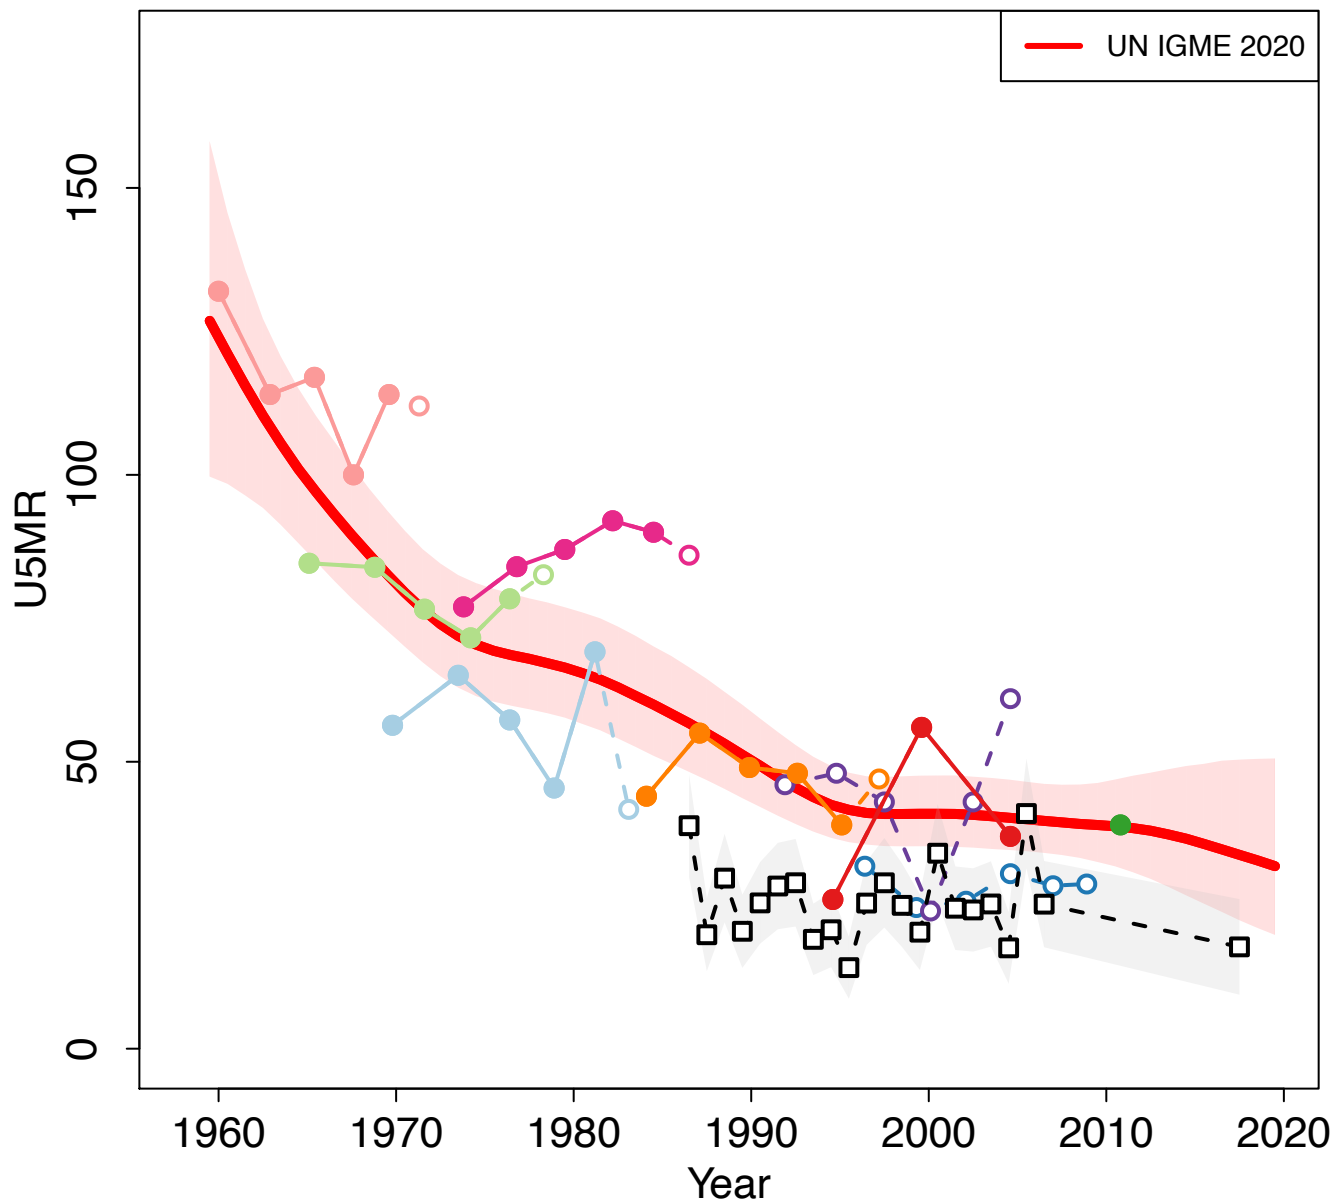

### Zoomed in

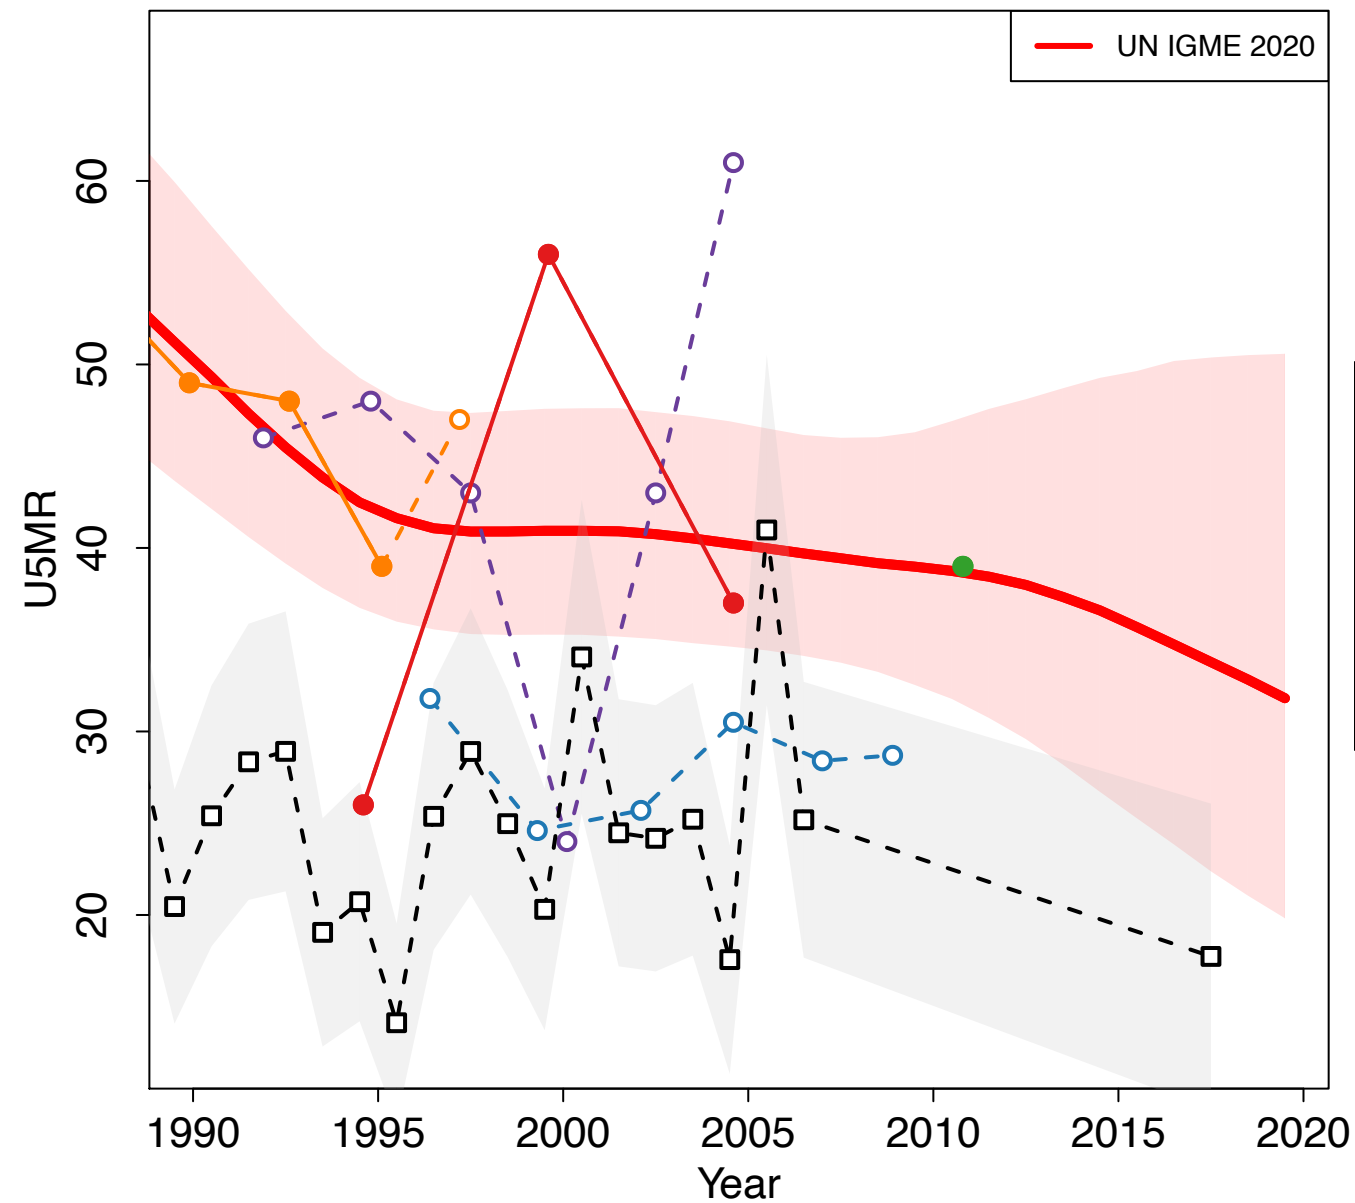

- Census 1973 (Census Indirect)
- Census 1980 (Census Indirect)
- Women's Health Survey 1985 (Others Indirect)
- Census 1988 (Census Indirect)
- Census 1999 (Census Indirect)
- Demographic and Health Survey 2007 (Other DHS Direct)
- Demographic and Health Survey 2007 (Other DHS Indirect)
- Census 2011 (Others Household Deaths)
- Census 2011 (Census Indirect)
- VR WHO



# Mauritania

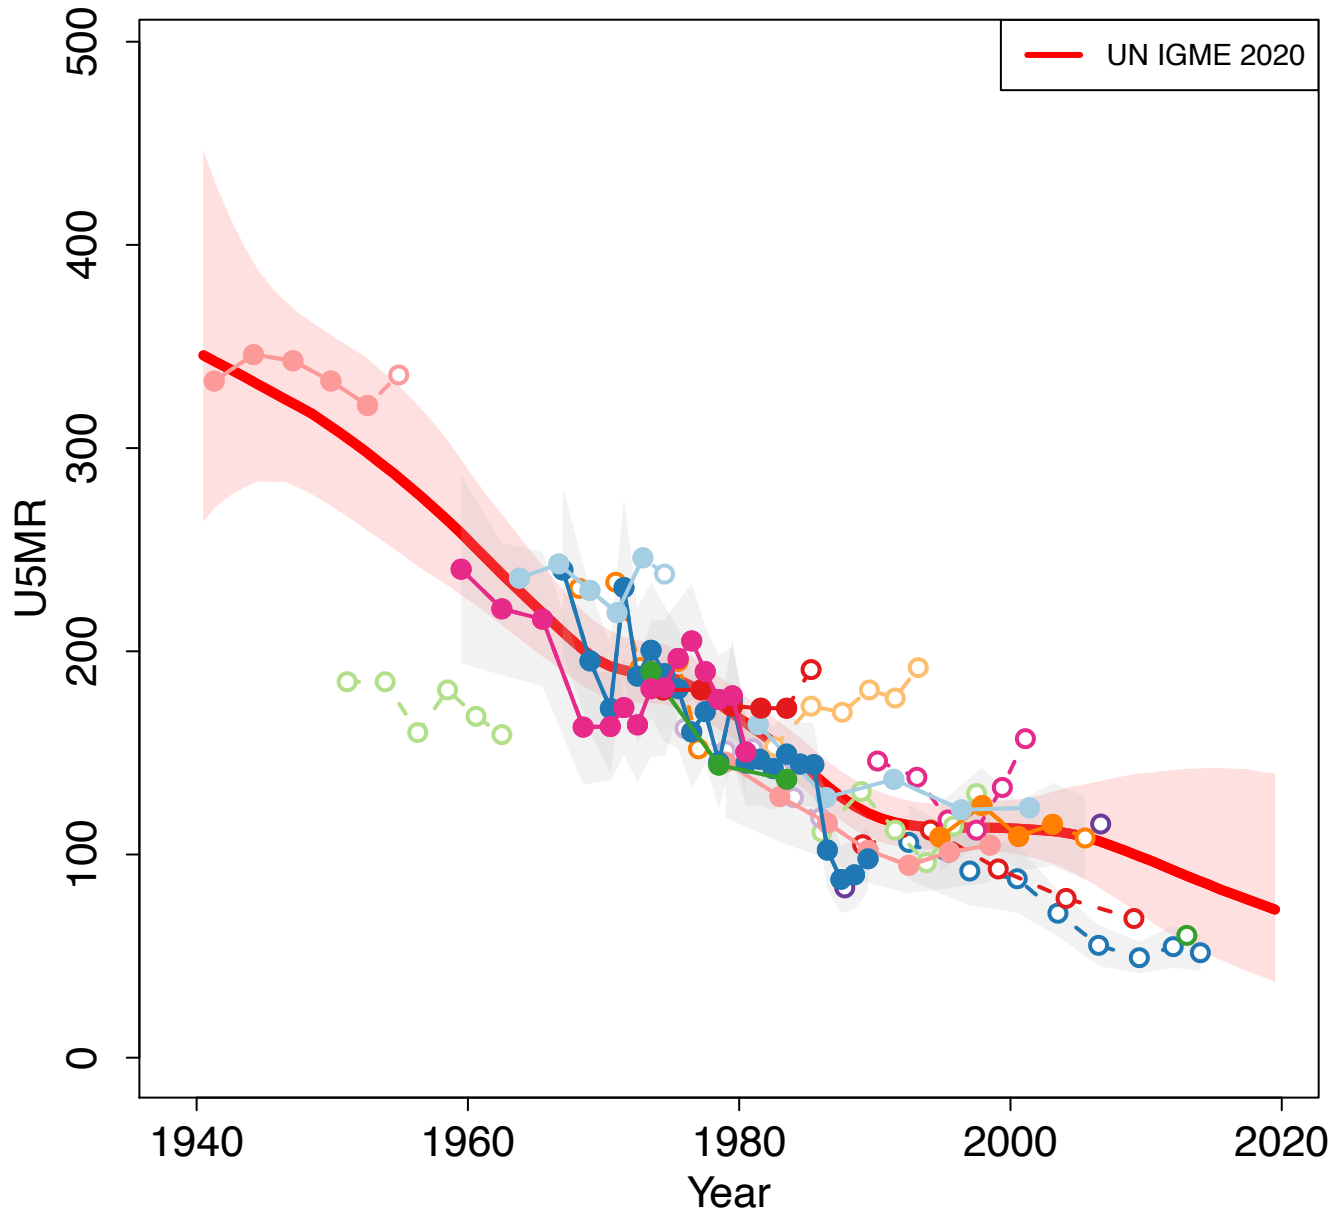

# Zoomed in

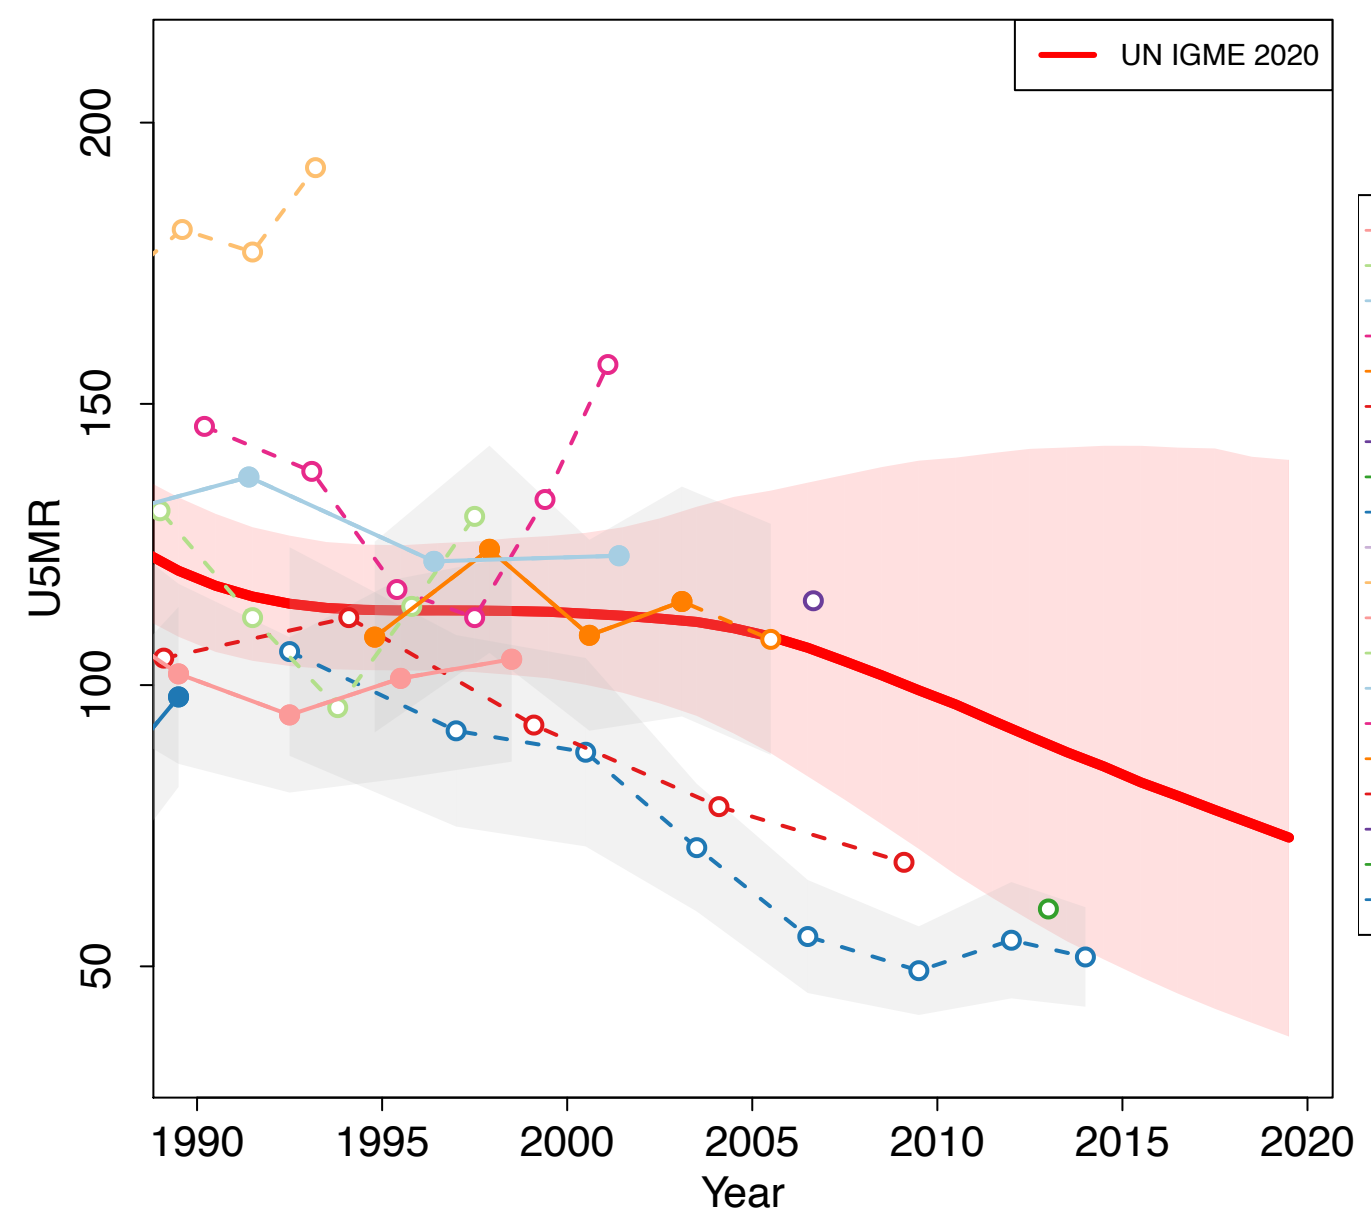

- Fouta-Toro-Survey 1957 (Others Indirect)
- Survey 1964-1965 (Others Indirect)
- Census 1977 (Census Indirect)
- World Fertility Survey 1981-1982 (Other DHS Direct)
- World Fertility Survey 1981-1982 (Other DHS Indirect)
- Census 1988 (Census Indirect)
- Census 1988 (Others Household Deaths)
- Maternal and Child Health Survey 1990 (Others Direct)
- PAPCHILD Maternal and Child Health Survey 1990 (Others Direct)
- Maternal and Child Health Survey 1990 (Others Indirect)
- Multiple Indicator Cluster Survey 1995 (Others Indirect)
- Demographic and Health Survey 2000-2001 (DHS Direct)
- Demographic and Health Survey 2000-2001 (DHS Indirect)
- EMIP survey 2003-2004 (Others Direct)
- EMIP survey 2003-2004 (Others Indirect)
- Multiple Indicator Cluster Survey 2007 (MICS Indirect)
- Multiple Indicator Cluster Survey 2011 (MICS Direct)
- Census 2013 (Census Indirect)
- Census 2013 (Others Household Deaths)
- Multiple Indicator Cluster Survey 2015 (MICS Direct)



### Mauritius

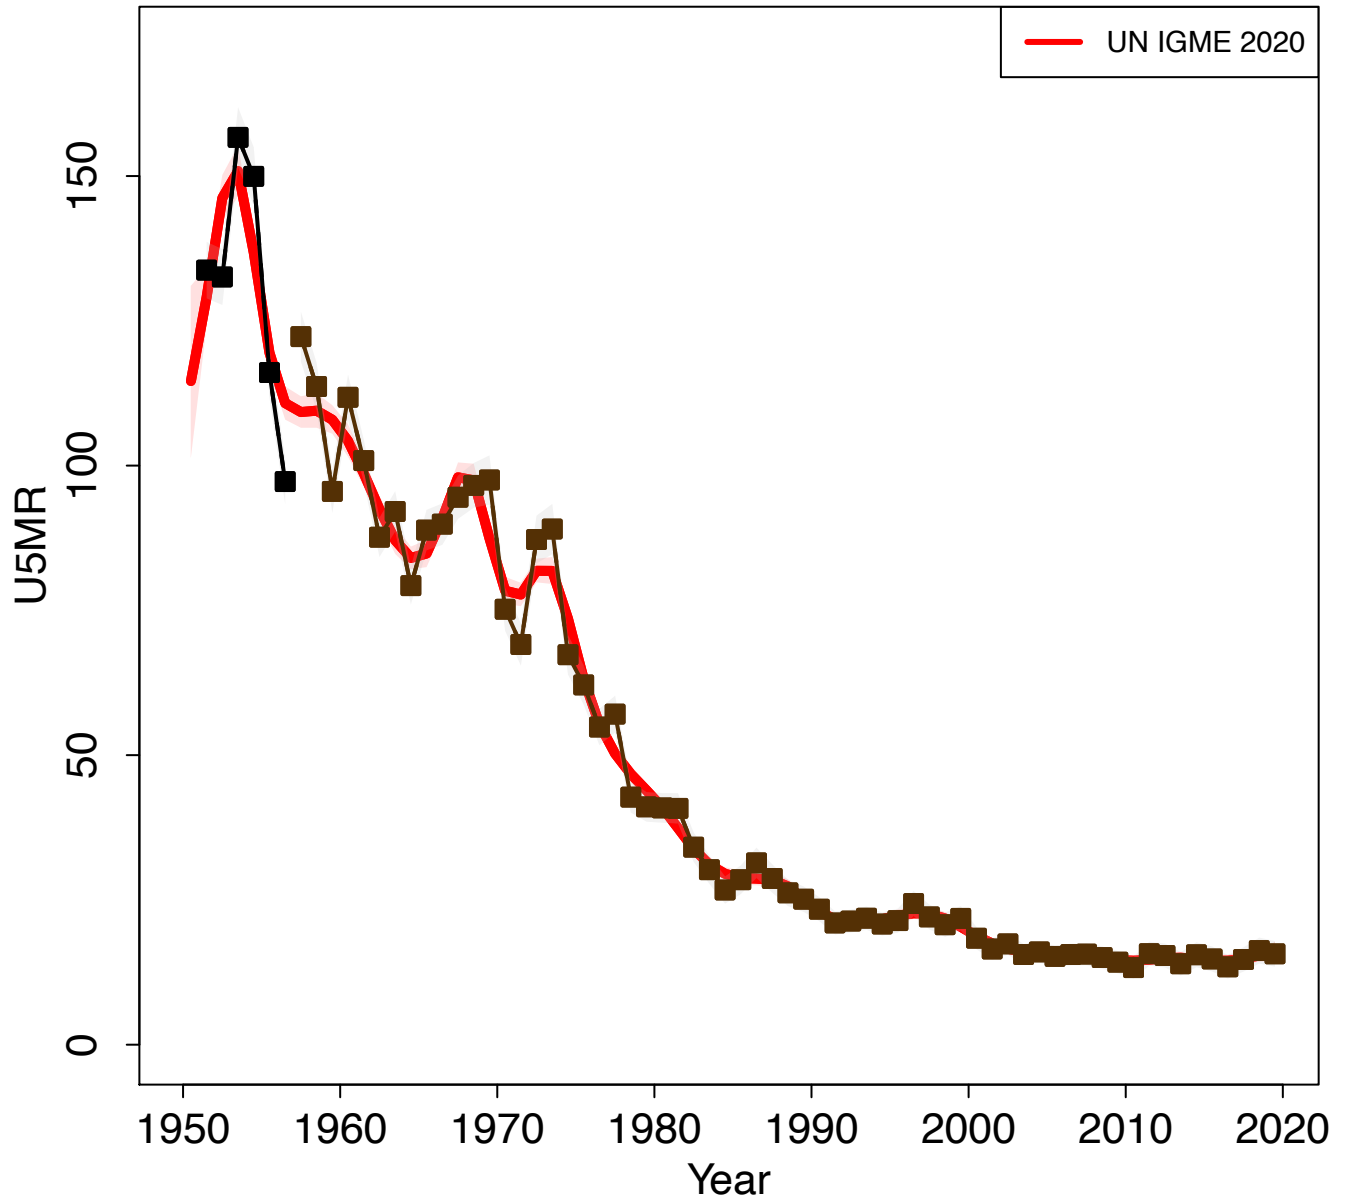

### Zoomed in

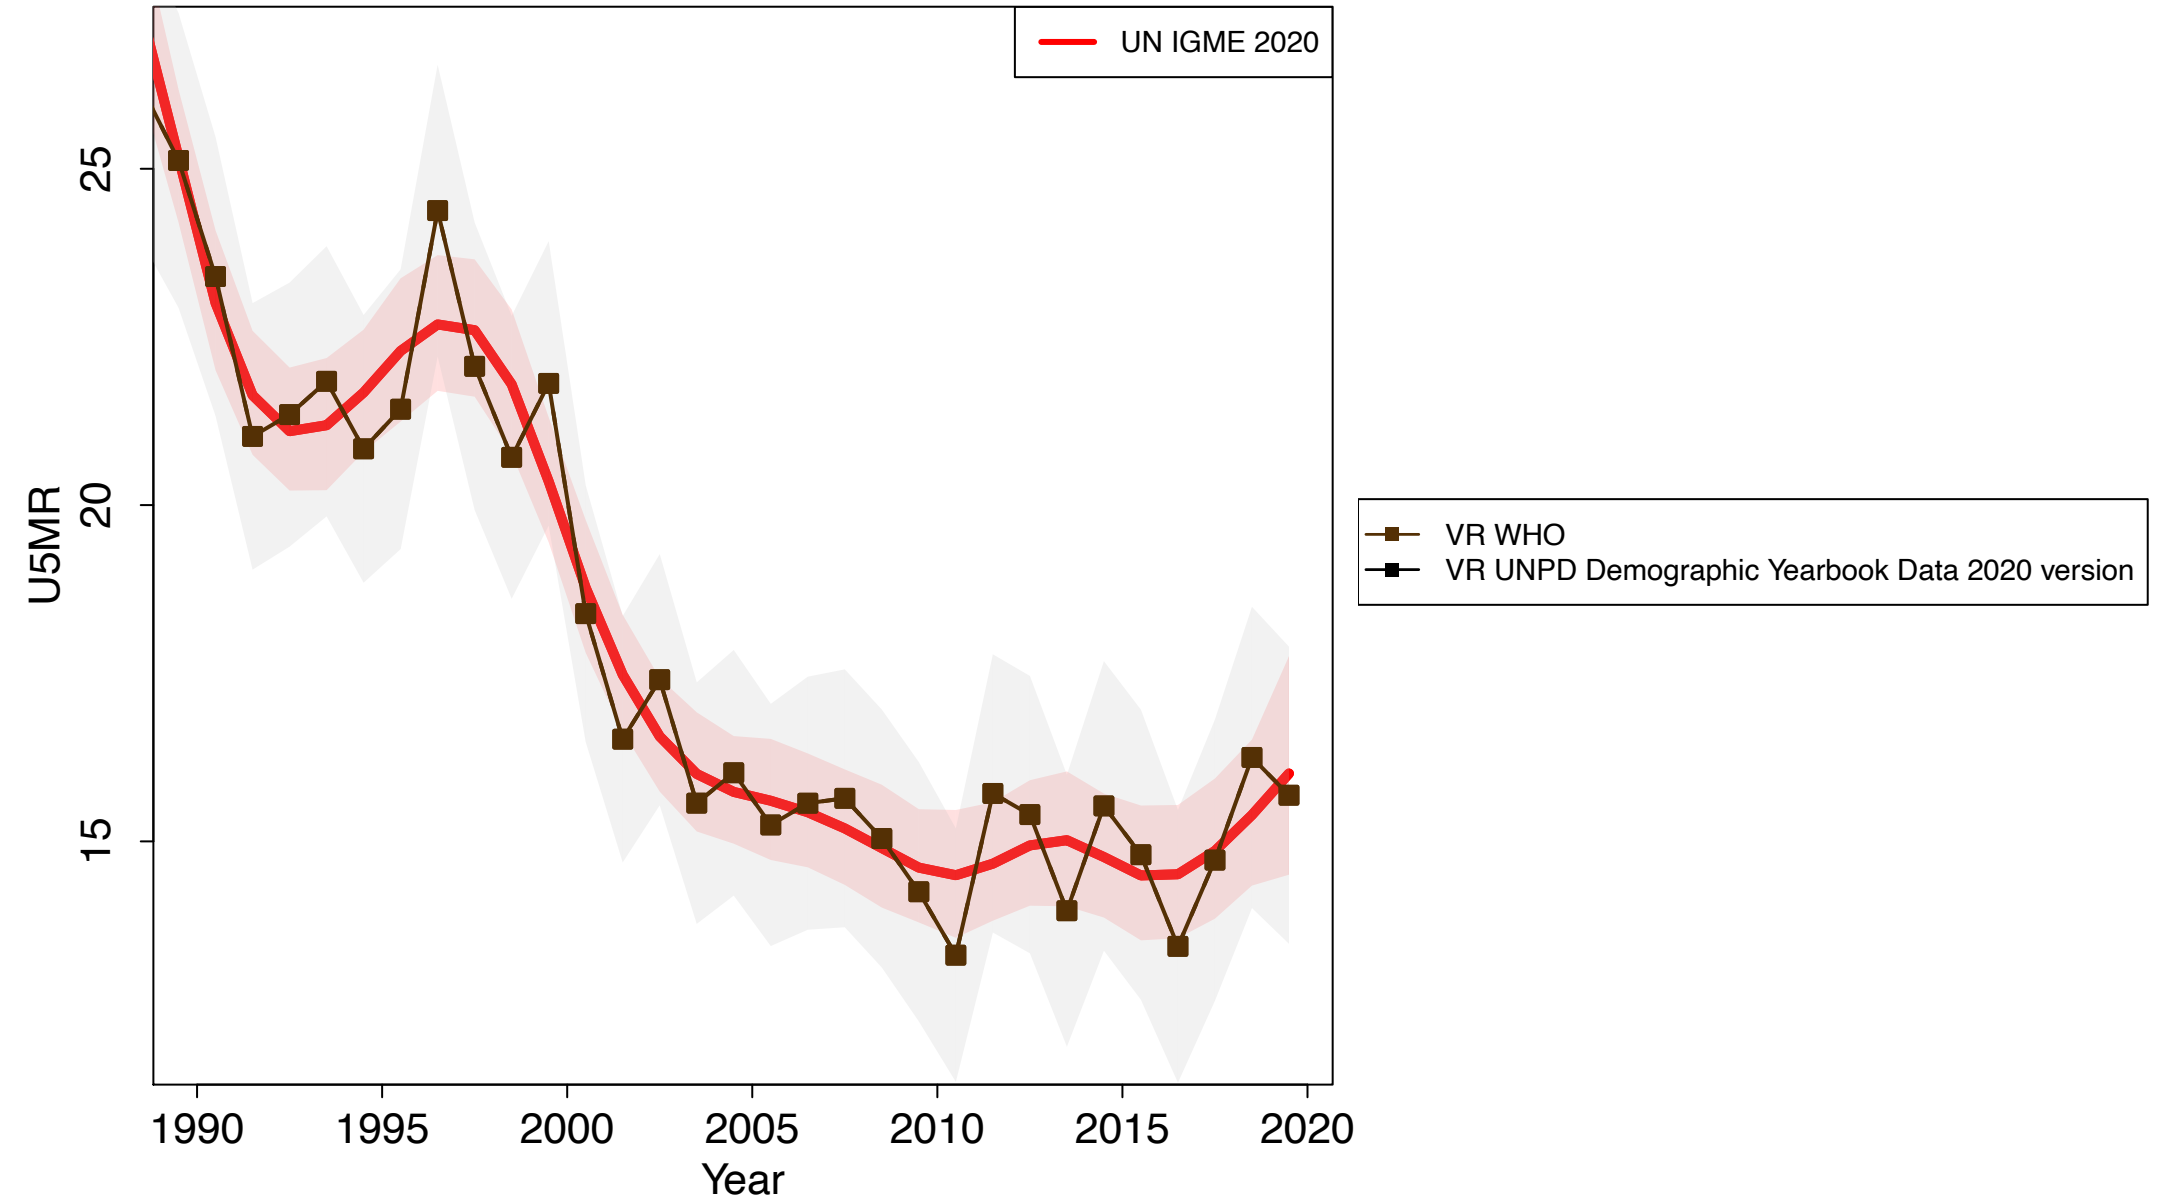

### Mexico

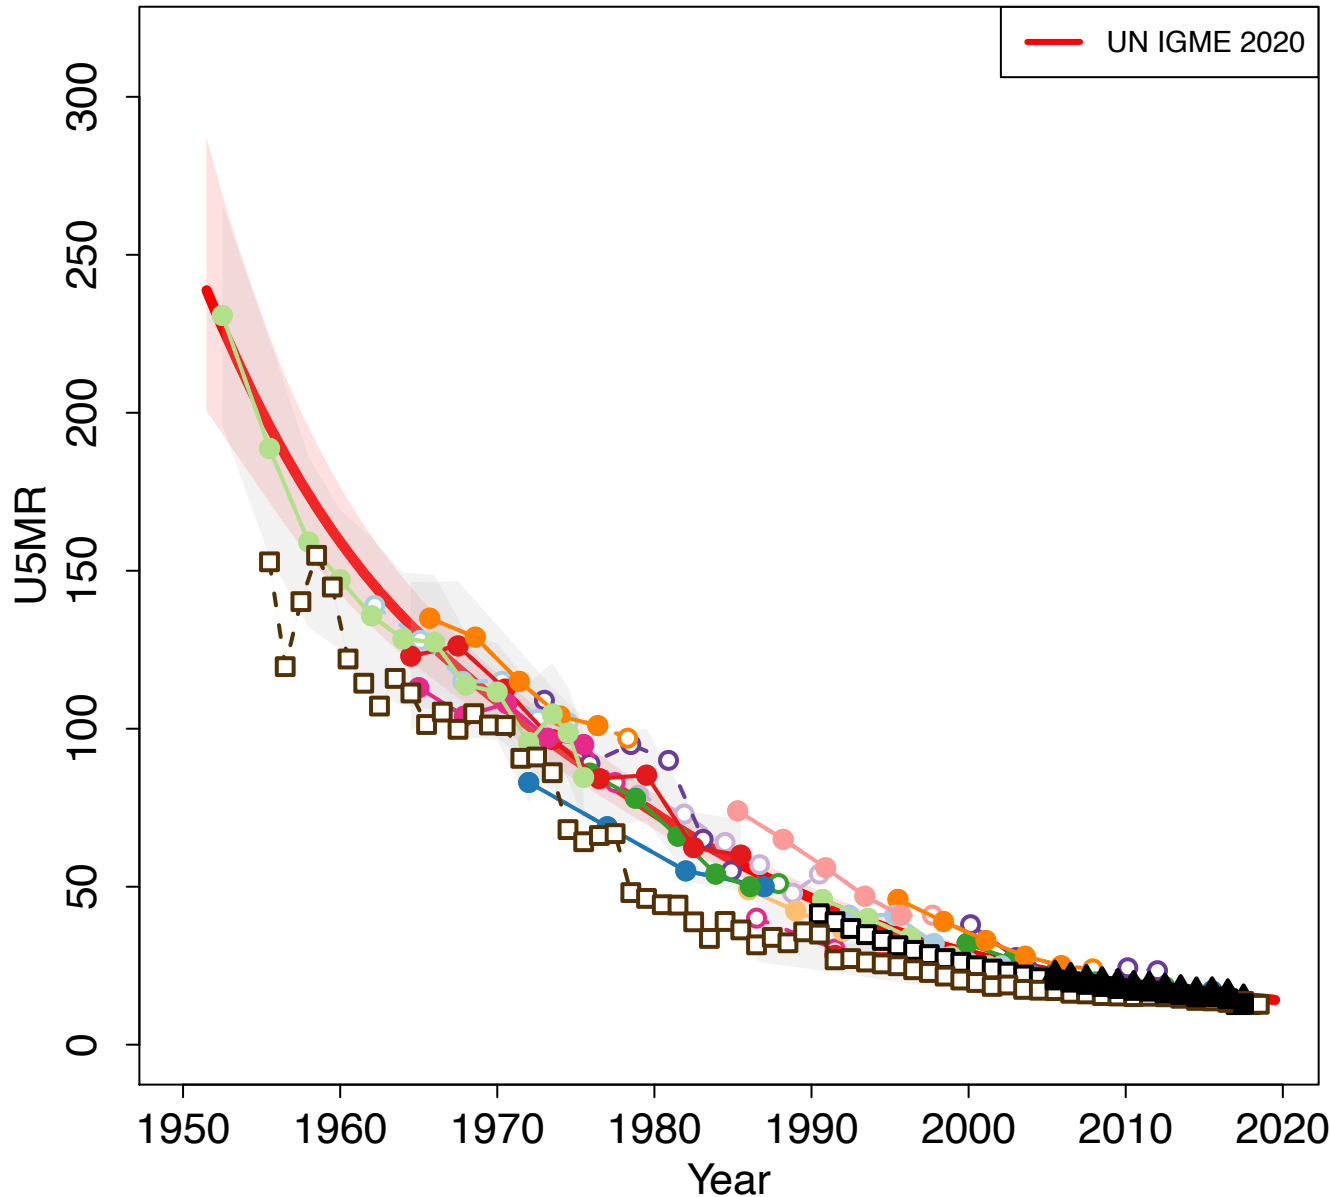

### Zoomed in

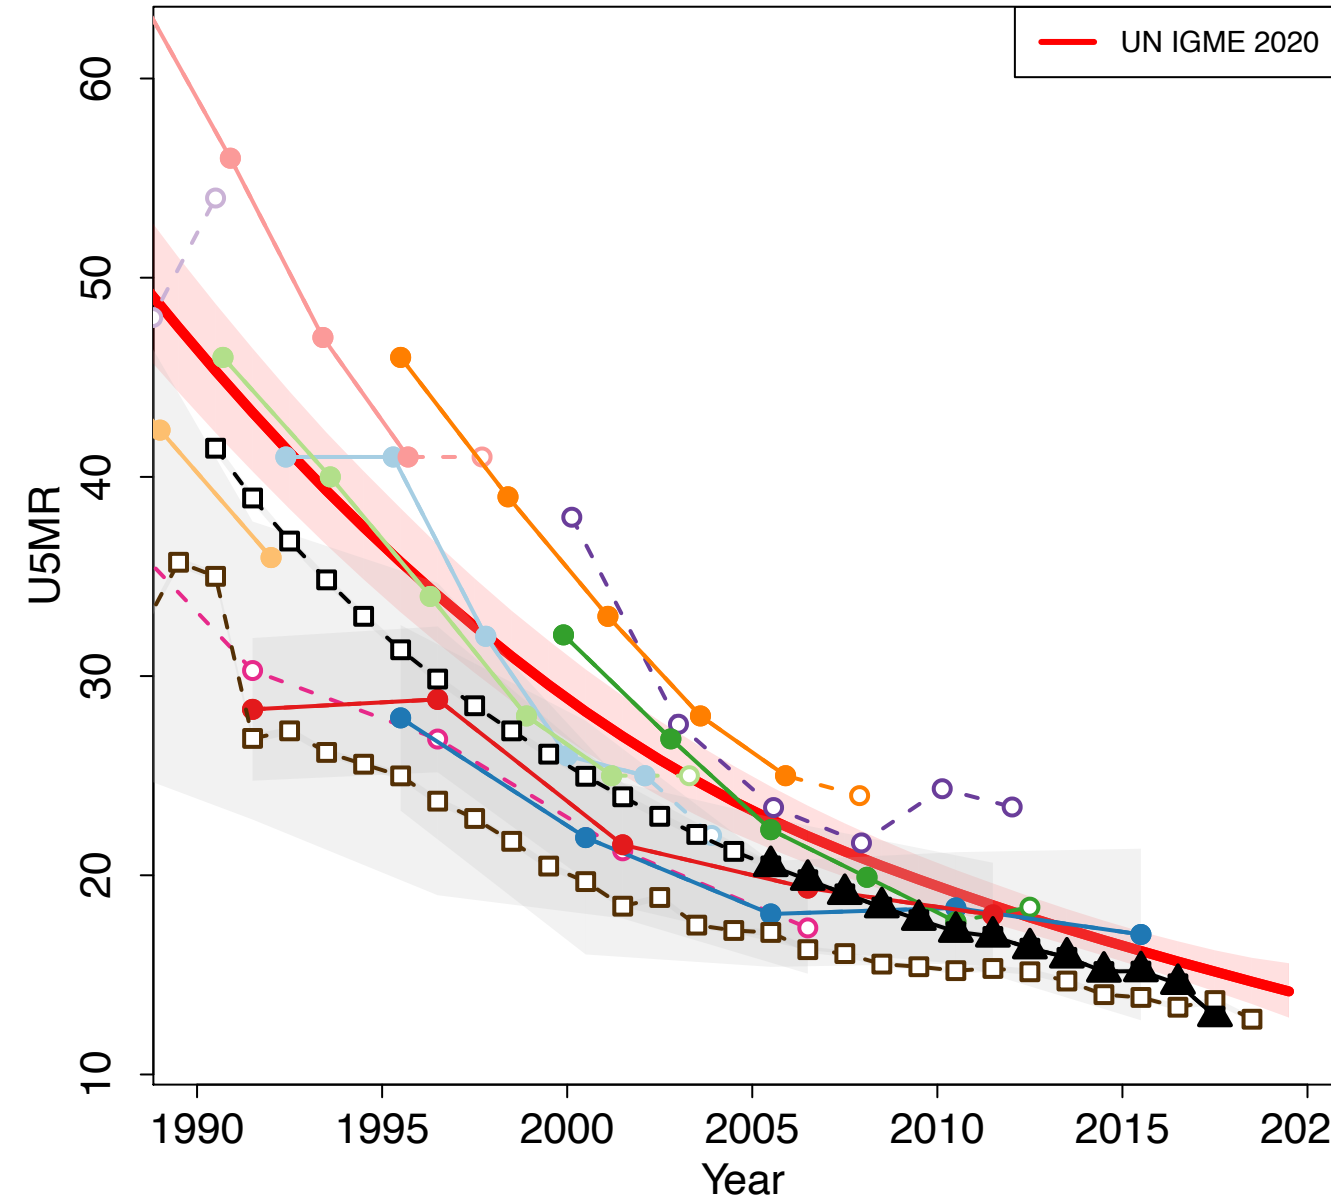

- World Fertility Survey 1976 (Other DHS Direct)
- World Fertility Survey 1976 (Other DHS Indirect)
- Contraceptive Prevalence Survey 1979 (Others Indirect)
- Census 1980 (Census Indirect)
- Demographic and Health Survey 1987 (DHS Direct)
- Demographic And Health Survey 1987 (DHS Indirect)
- Census 1990 (Census Indirect)
- Encuesta Nacional de la Dinamica Demografica (ENADID) 1992 (Others Direct)
- Encuesta Nacional de la Dinamica Demografica (ENADID) 1992 (Others Indirect)
- Encuesta Nacional de la Dinamica Demografica (ENADID) 1997 (Others Direct)
- Census 2000 (Census Indirect)
- Conteo 2005 (Others Indirect)
- Encuesta Nacional de la Dinamica Demografica (ENADID) 2006 (Others Indirect)
- Encuesta Nacional de la Dinamica Demografica (ENADID) 2009 (Others Direct)
- Census 2010 (Census Indirect)
- Encuesta Nacional de la Dinamica Demografica (ENADID) 2014 (Others Direct)
- Encuesta Nacional de la Dinamica Demografica (ENADID) 2014 (Others Indirect)
- Encuesta Intercensal 2015 (Others Indirect)
- Encuesta Nacional de la Dinamica Demografica (ENADID) 2018 (Others Direct)
- VR WHO
- VR Vital Registration data from Mexico Ministry of Health

# Republic of Moldova

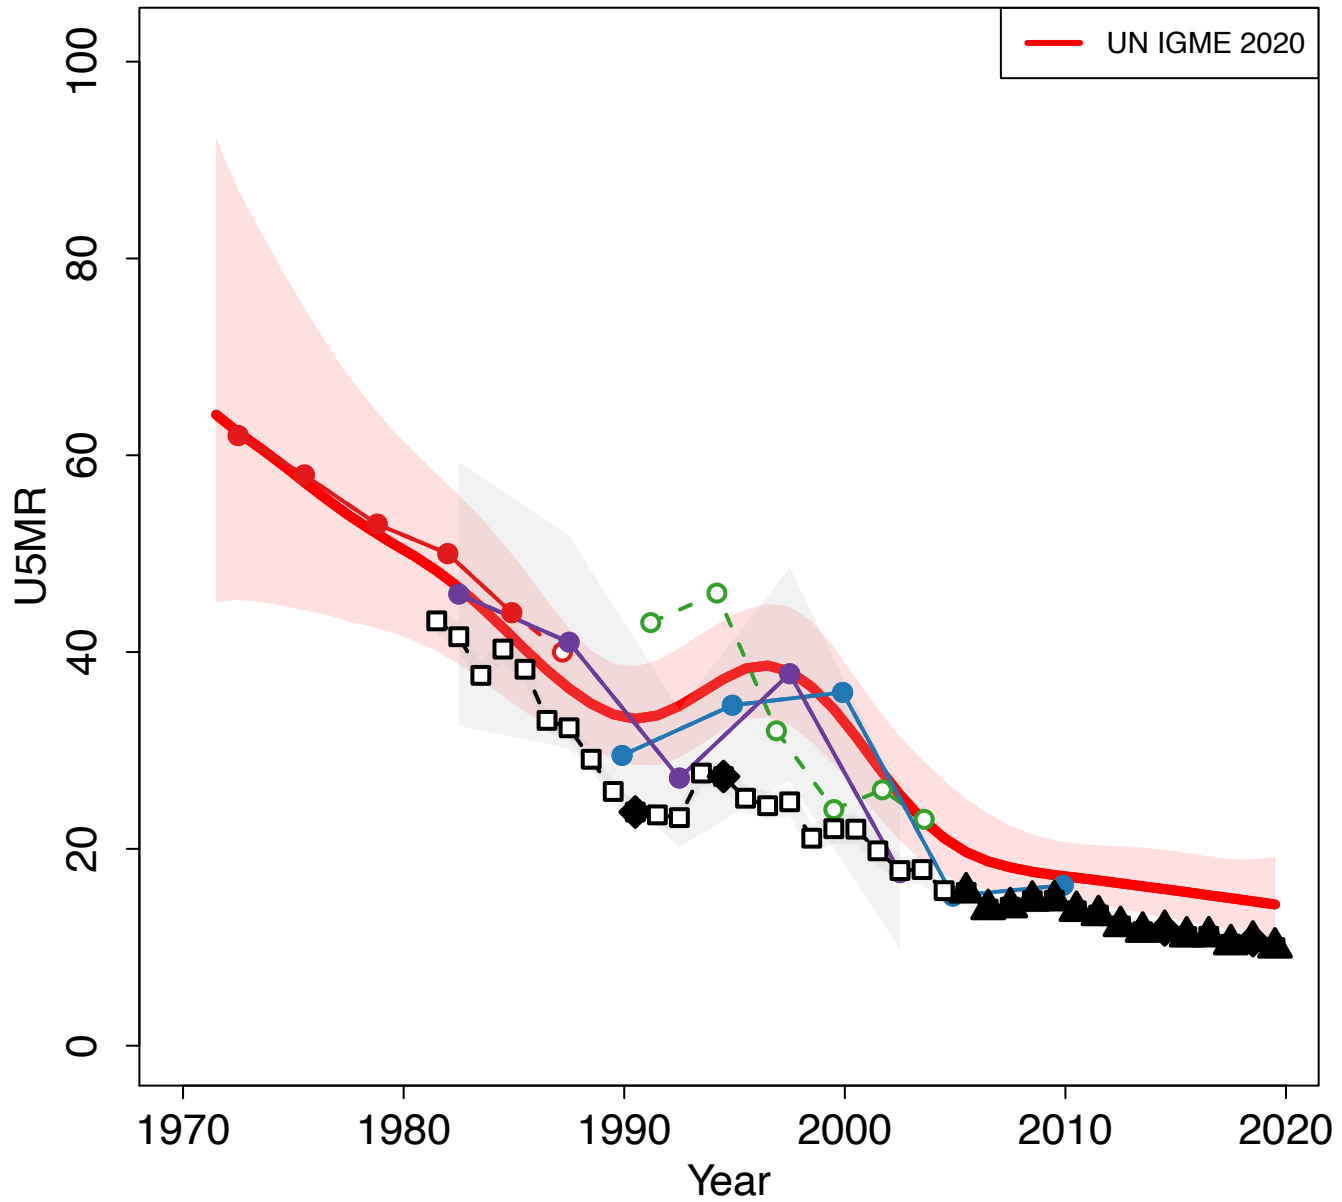

# Zoomed in

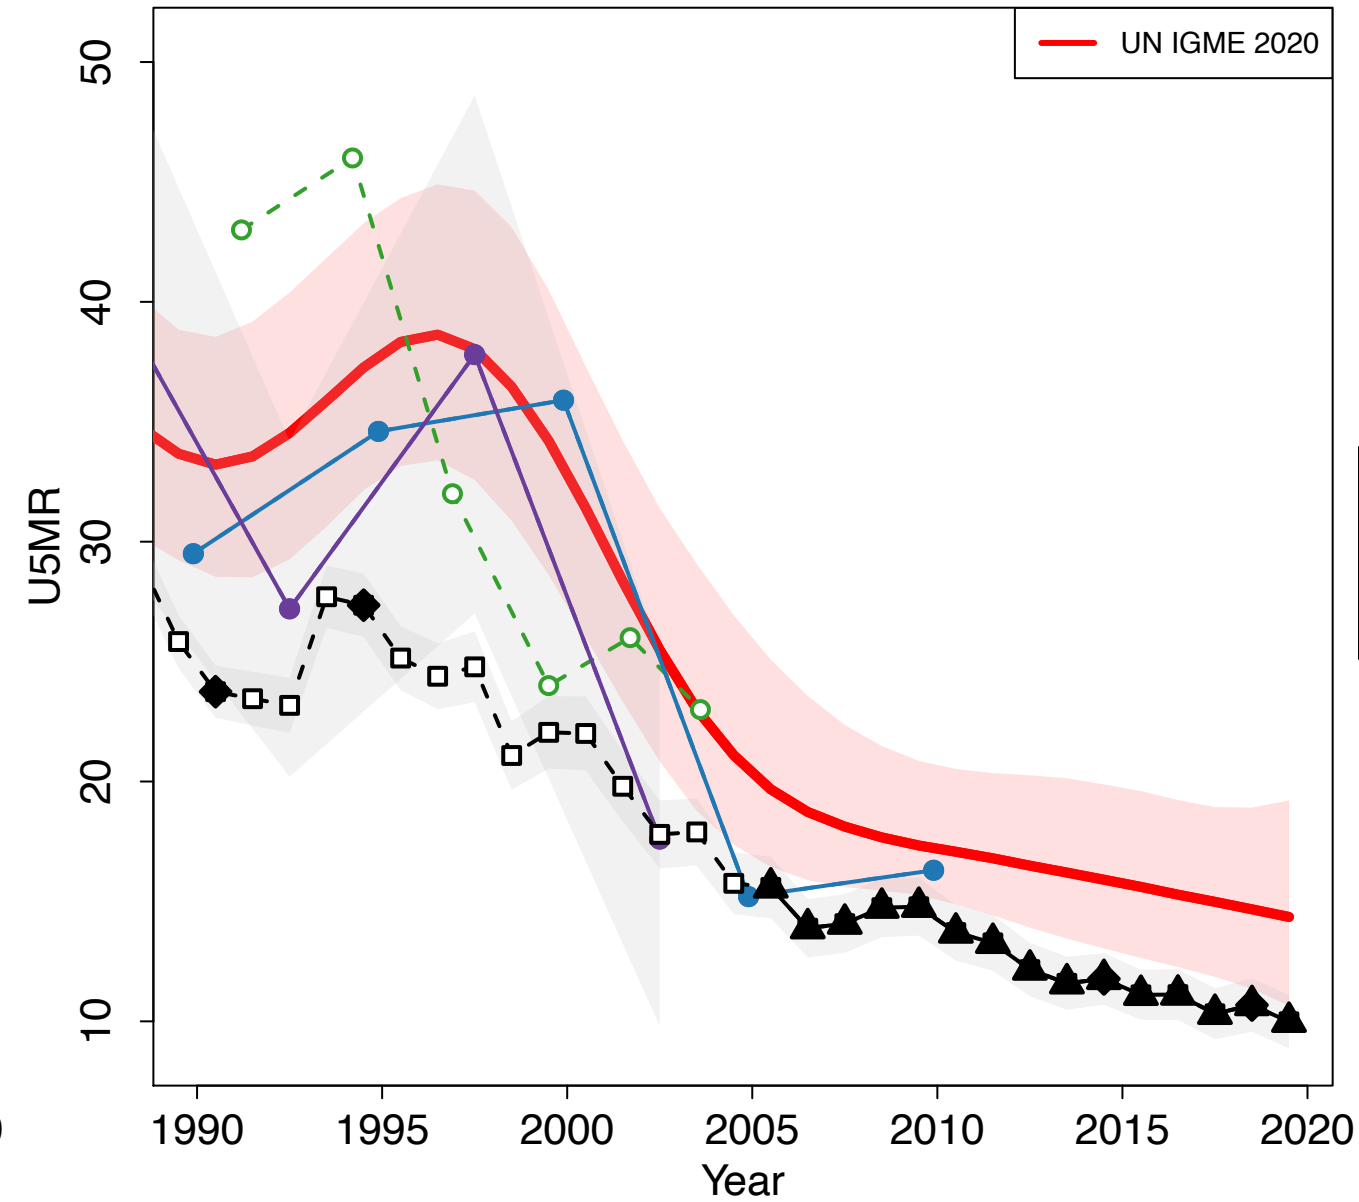

- Census 1989 (Census Indirect)
- Demographic and Health Survey 2005 (DHS Direct)
- Demographic and Health Survey 2005 (DHS Indirect)
- Multiple Indicator Cluster Survey 2012 (MICS Direct)
- VR WHO

### Monaco

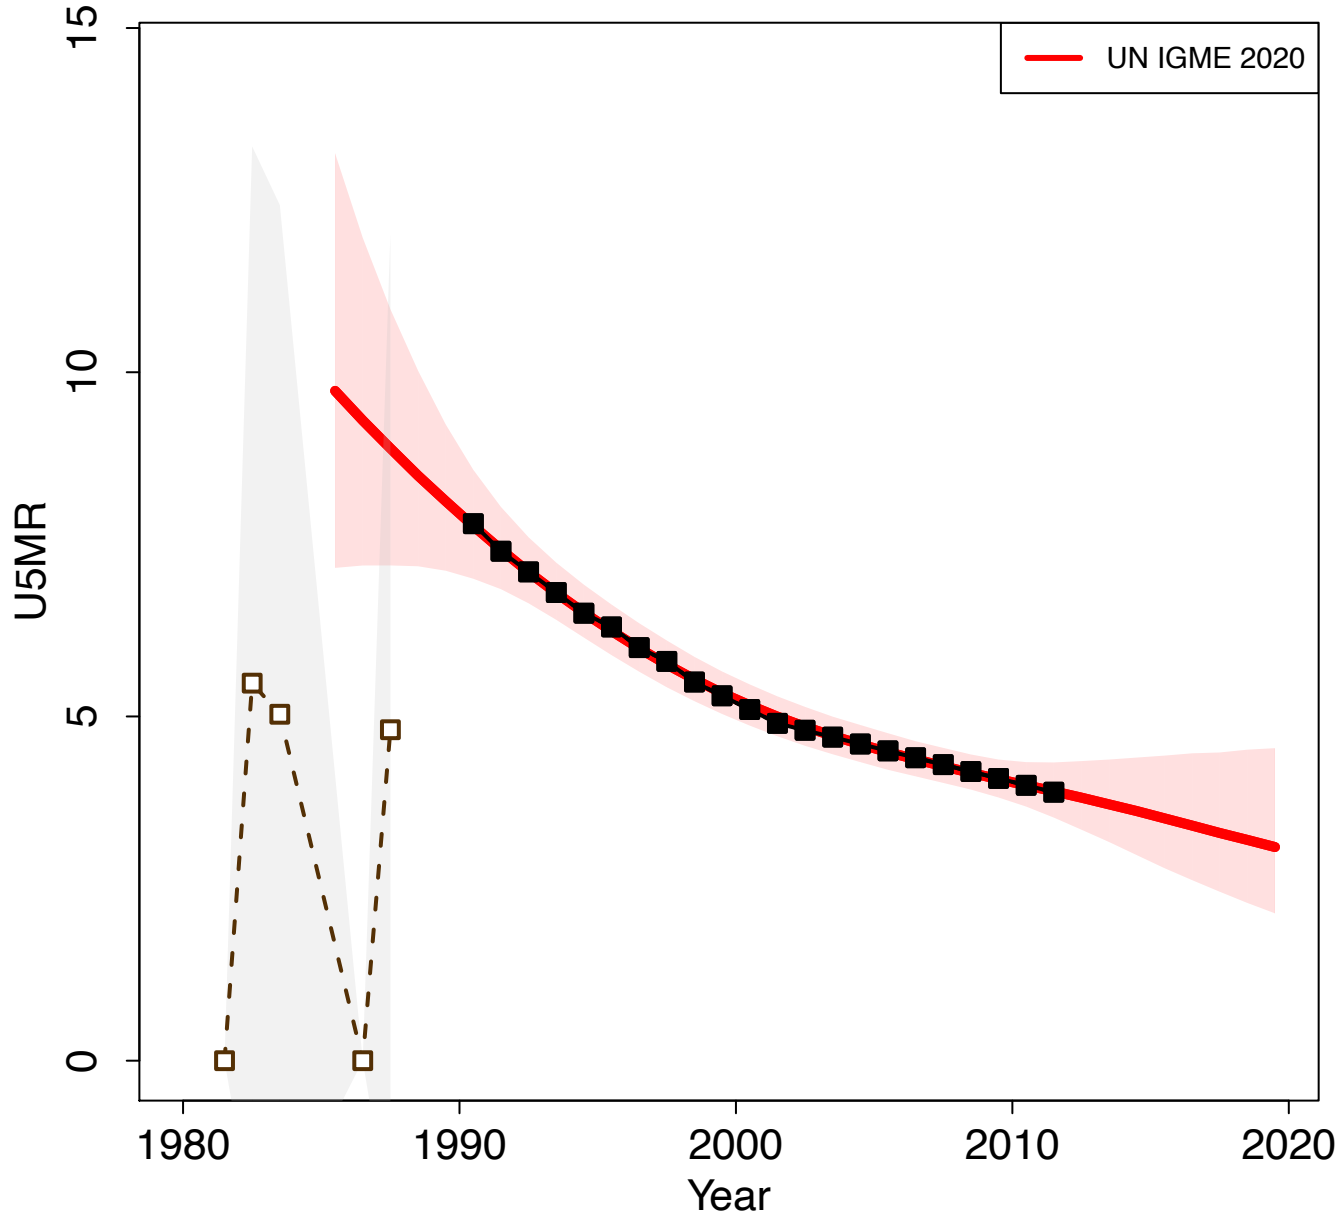

### Zoomed in

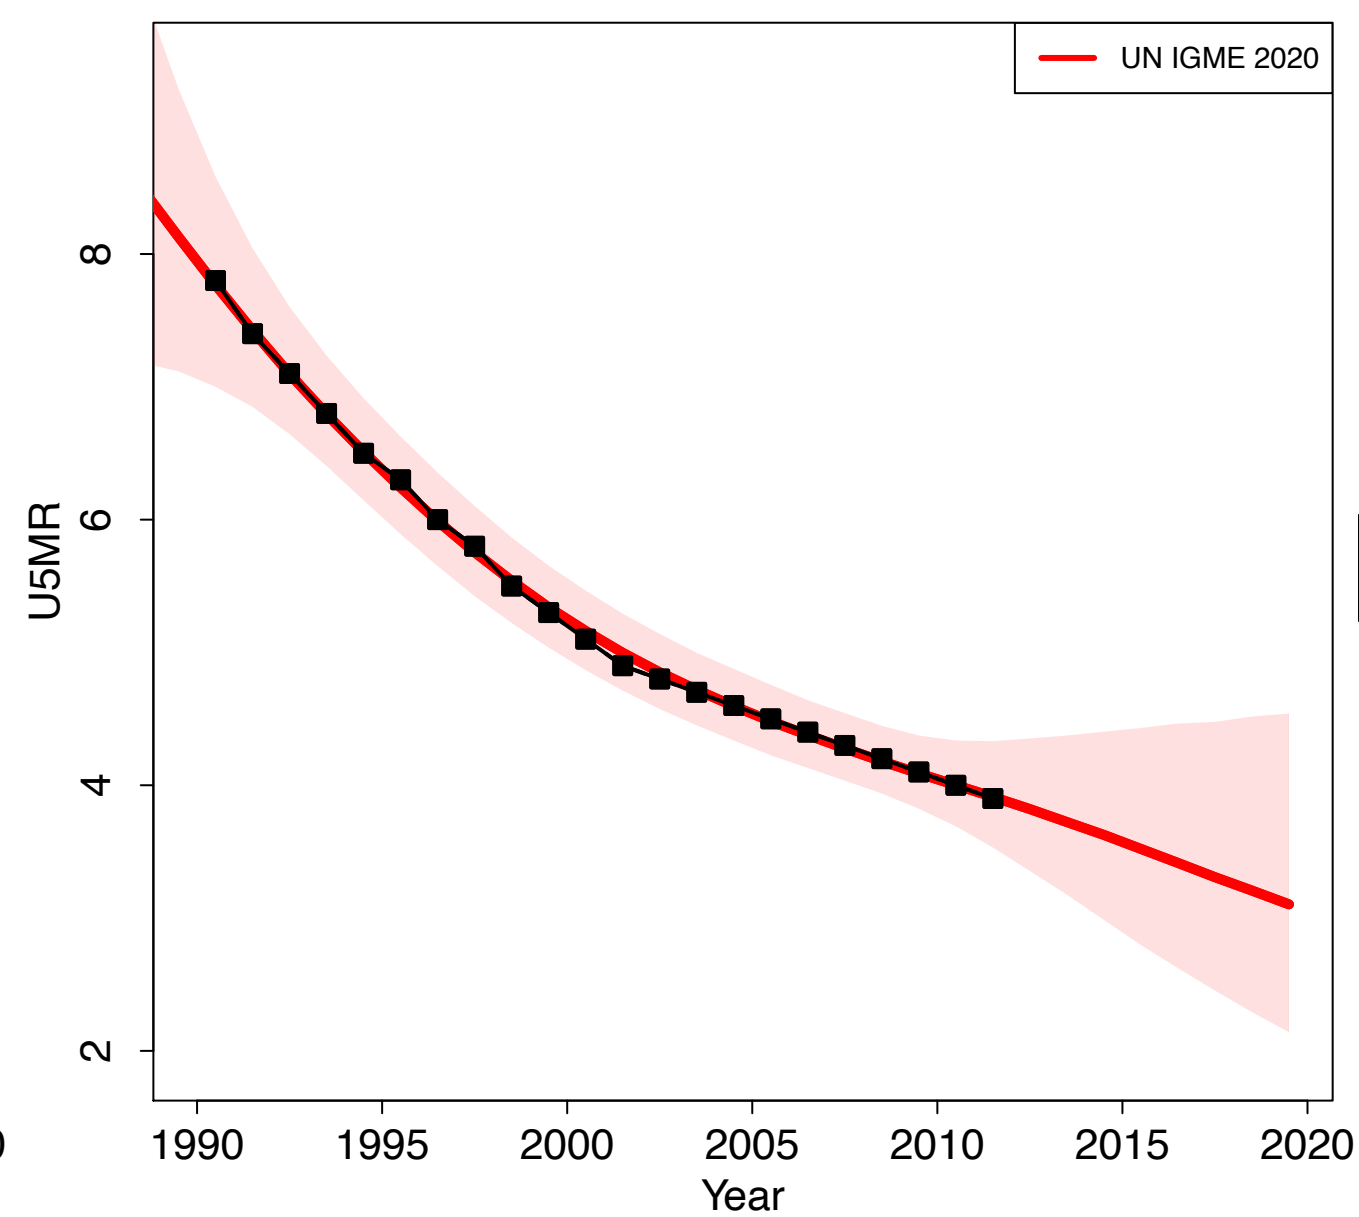

# Mongolia

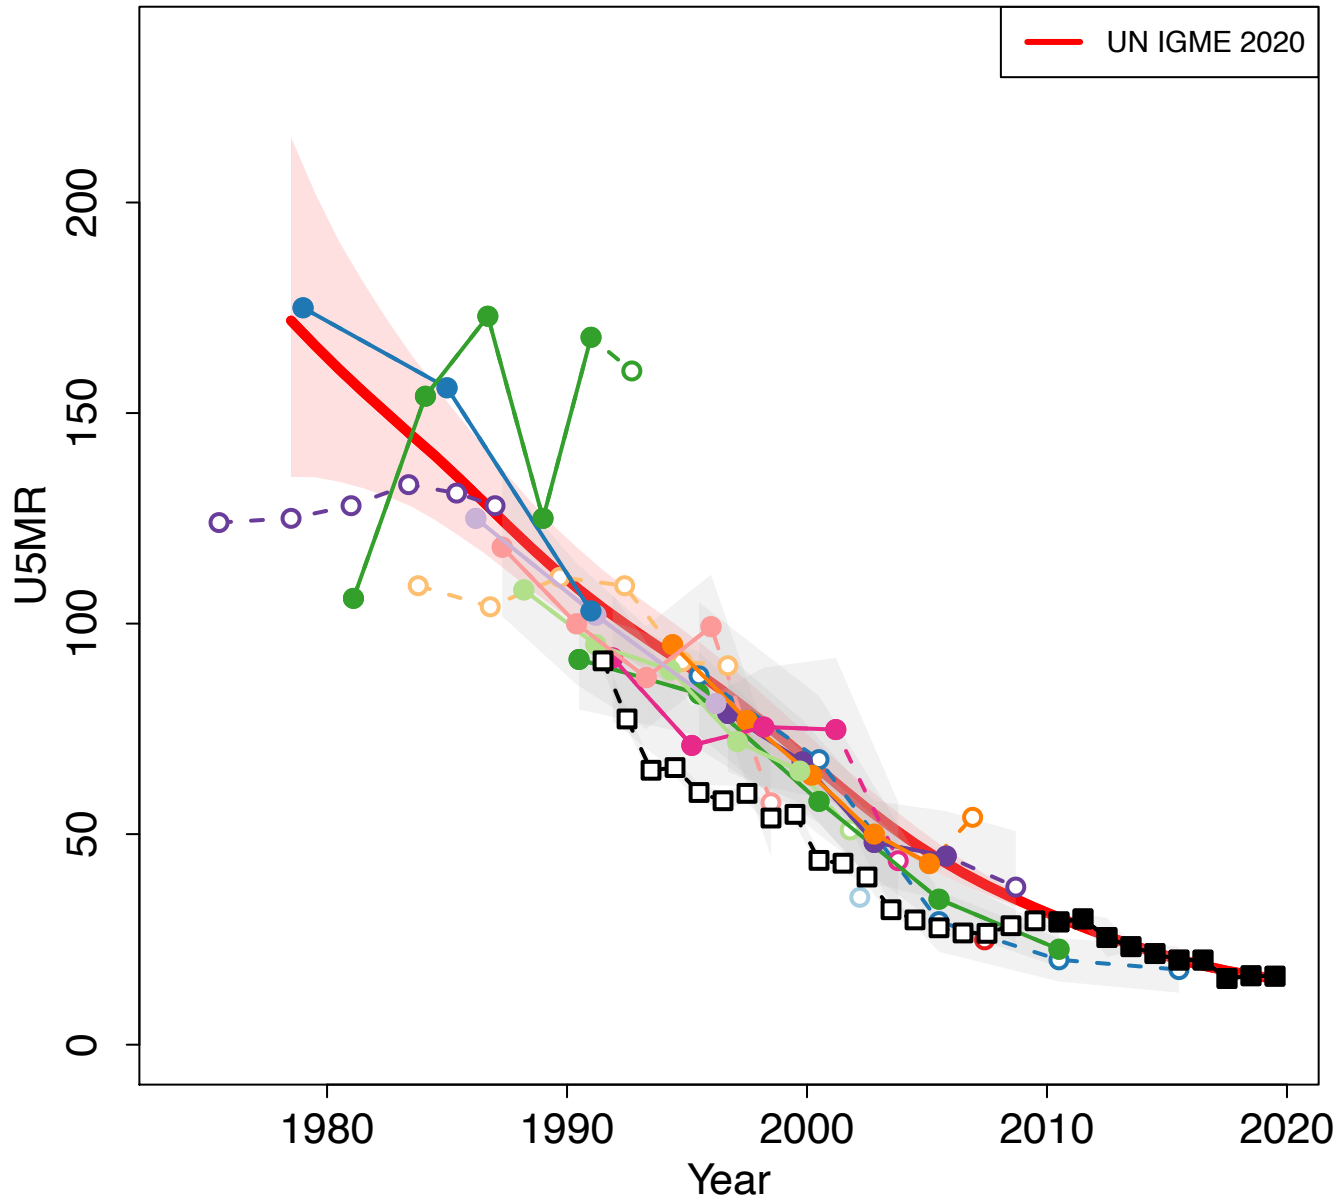

# Zoomed in

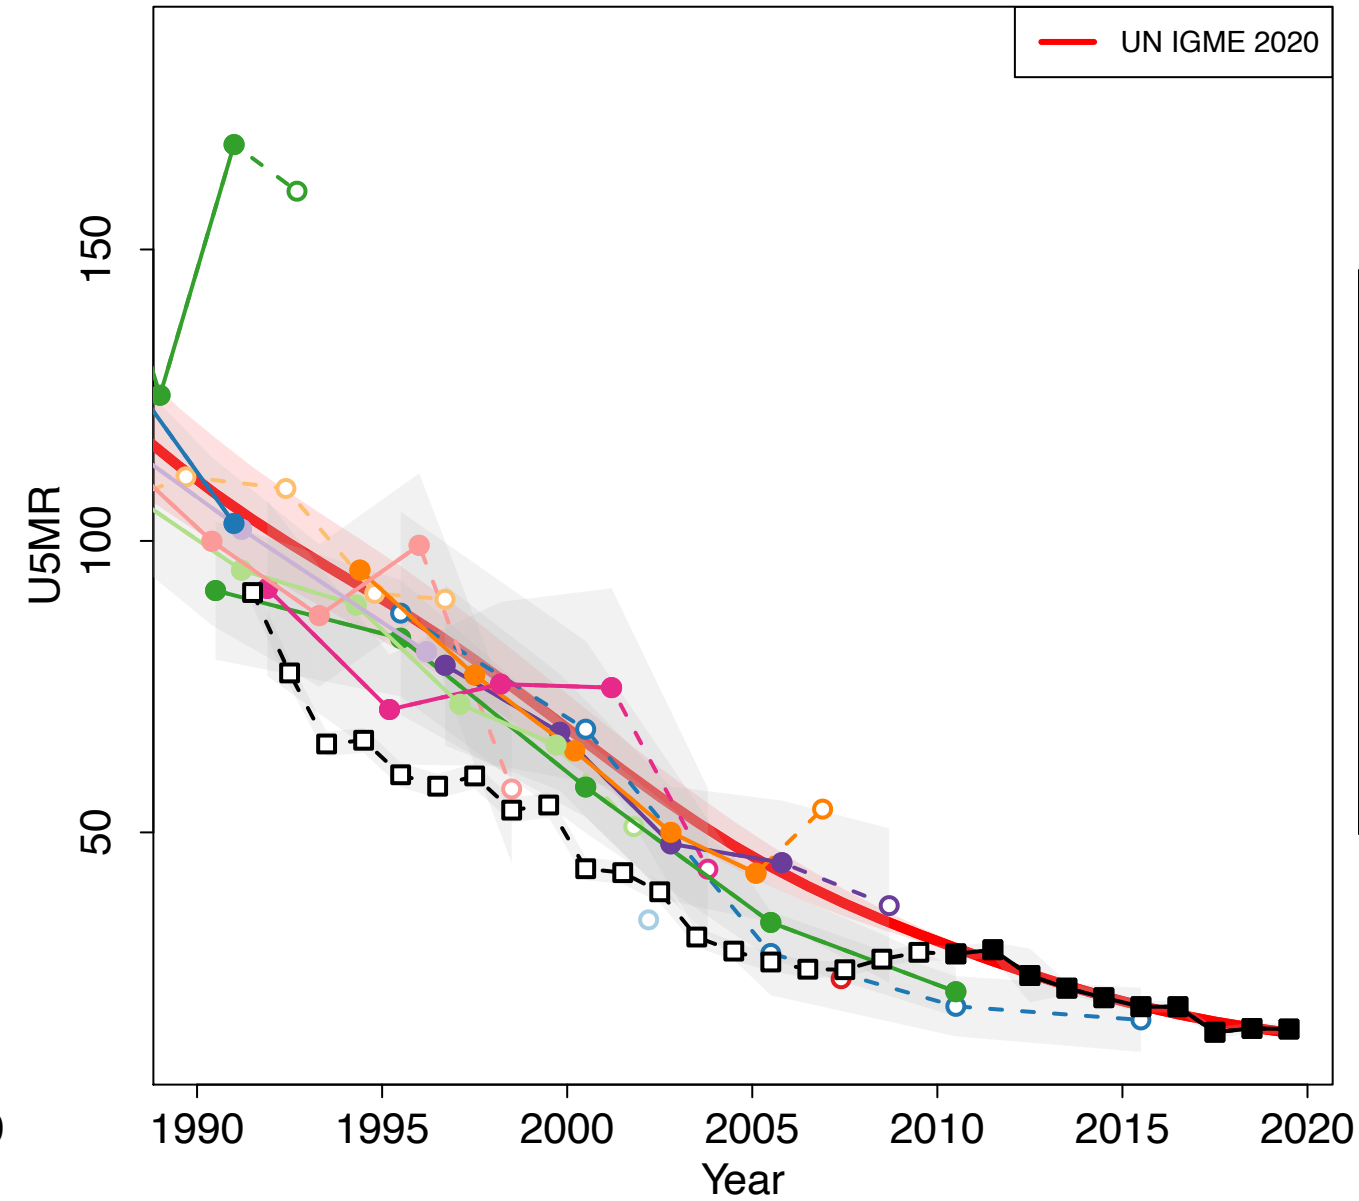

# Montenegro

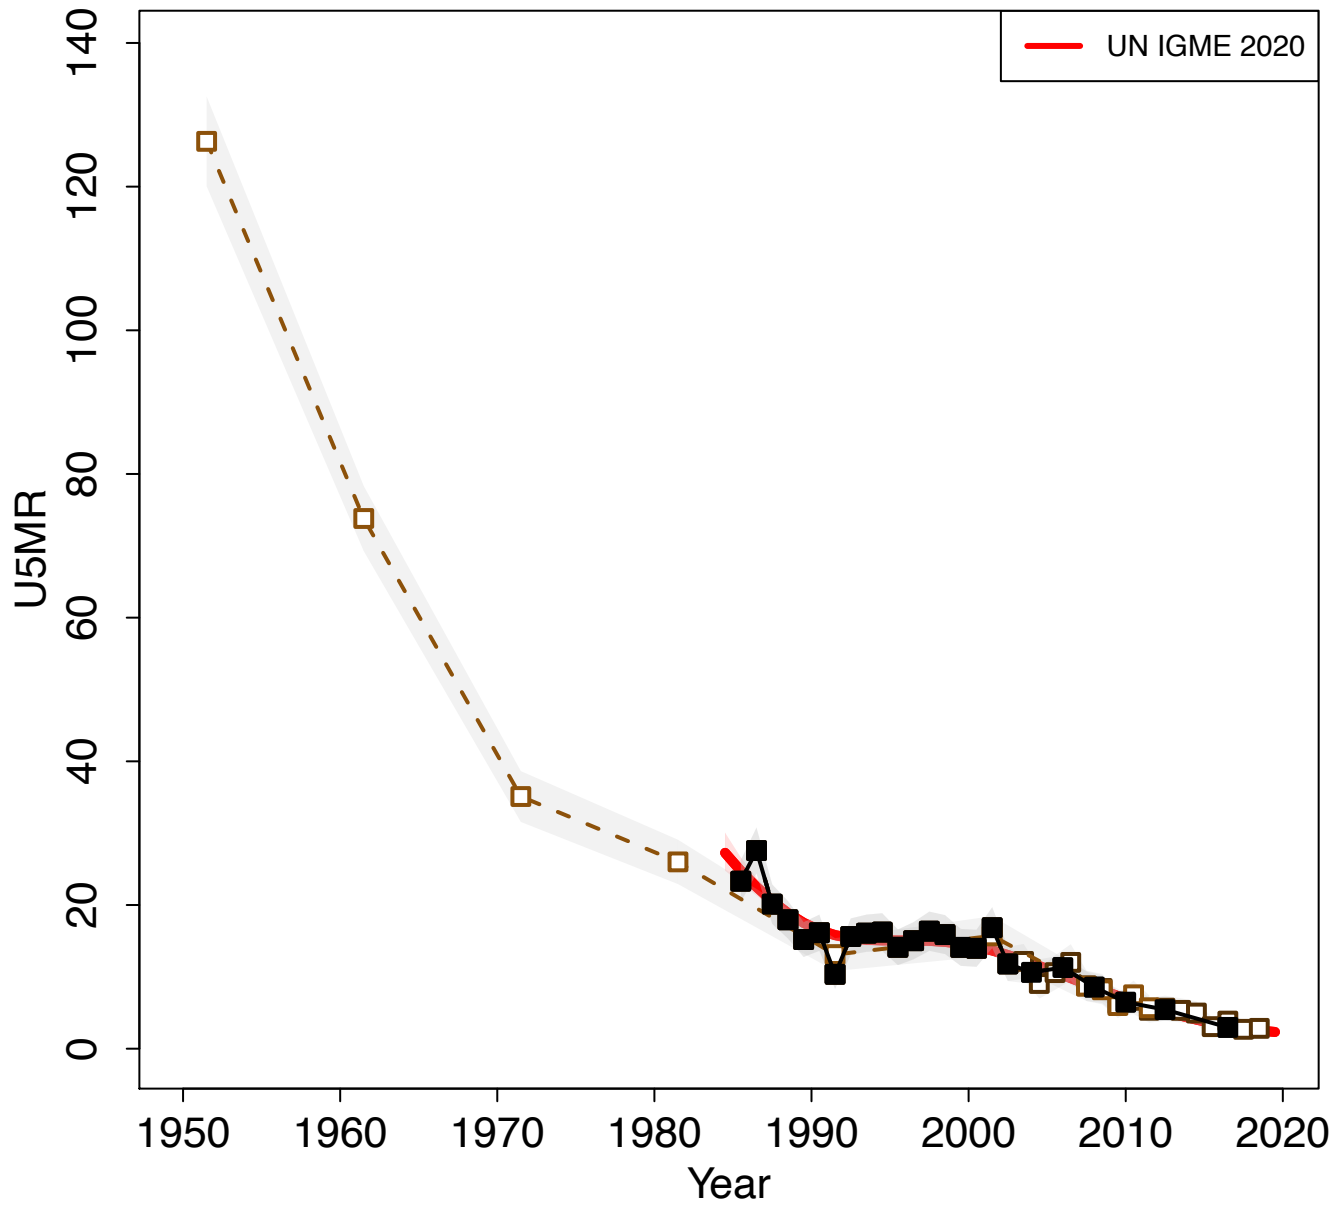

# Zoomed in

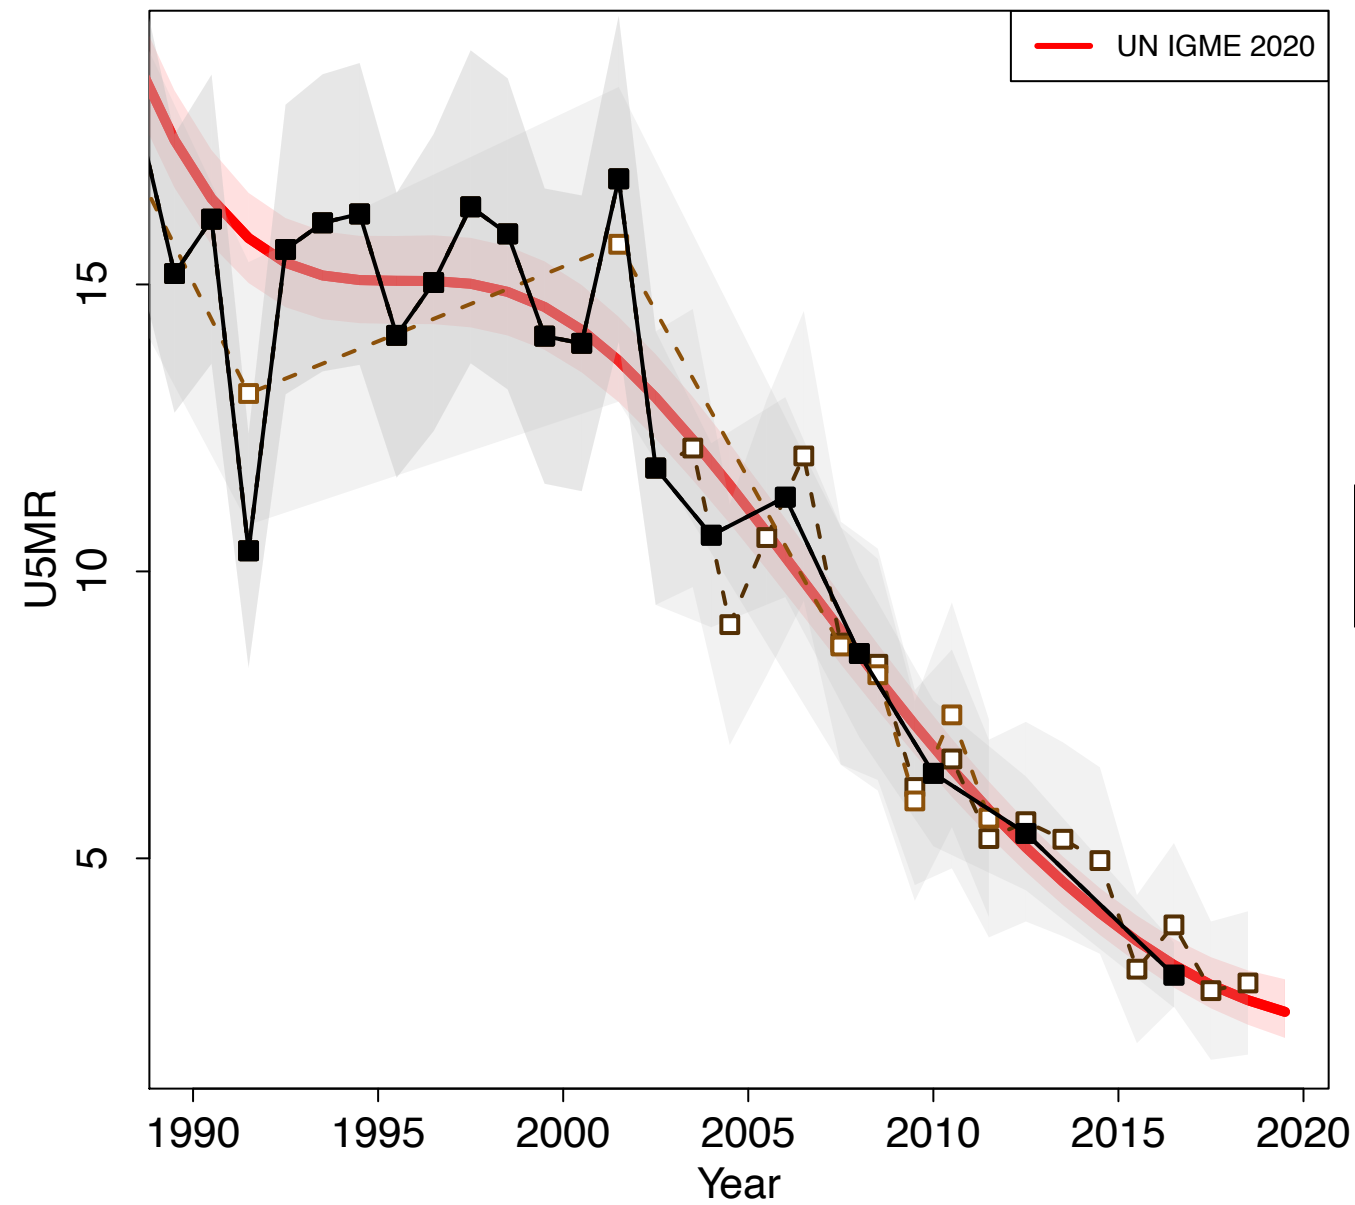

# Morocco

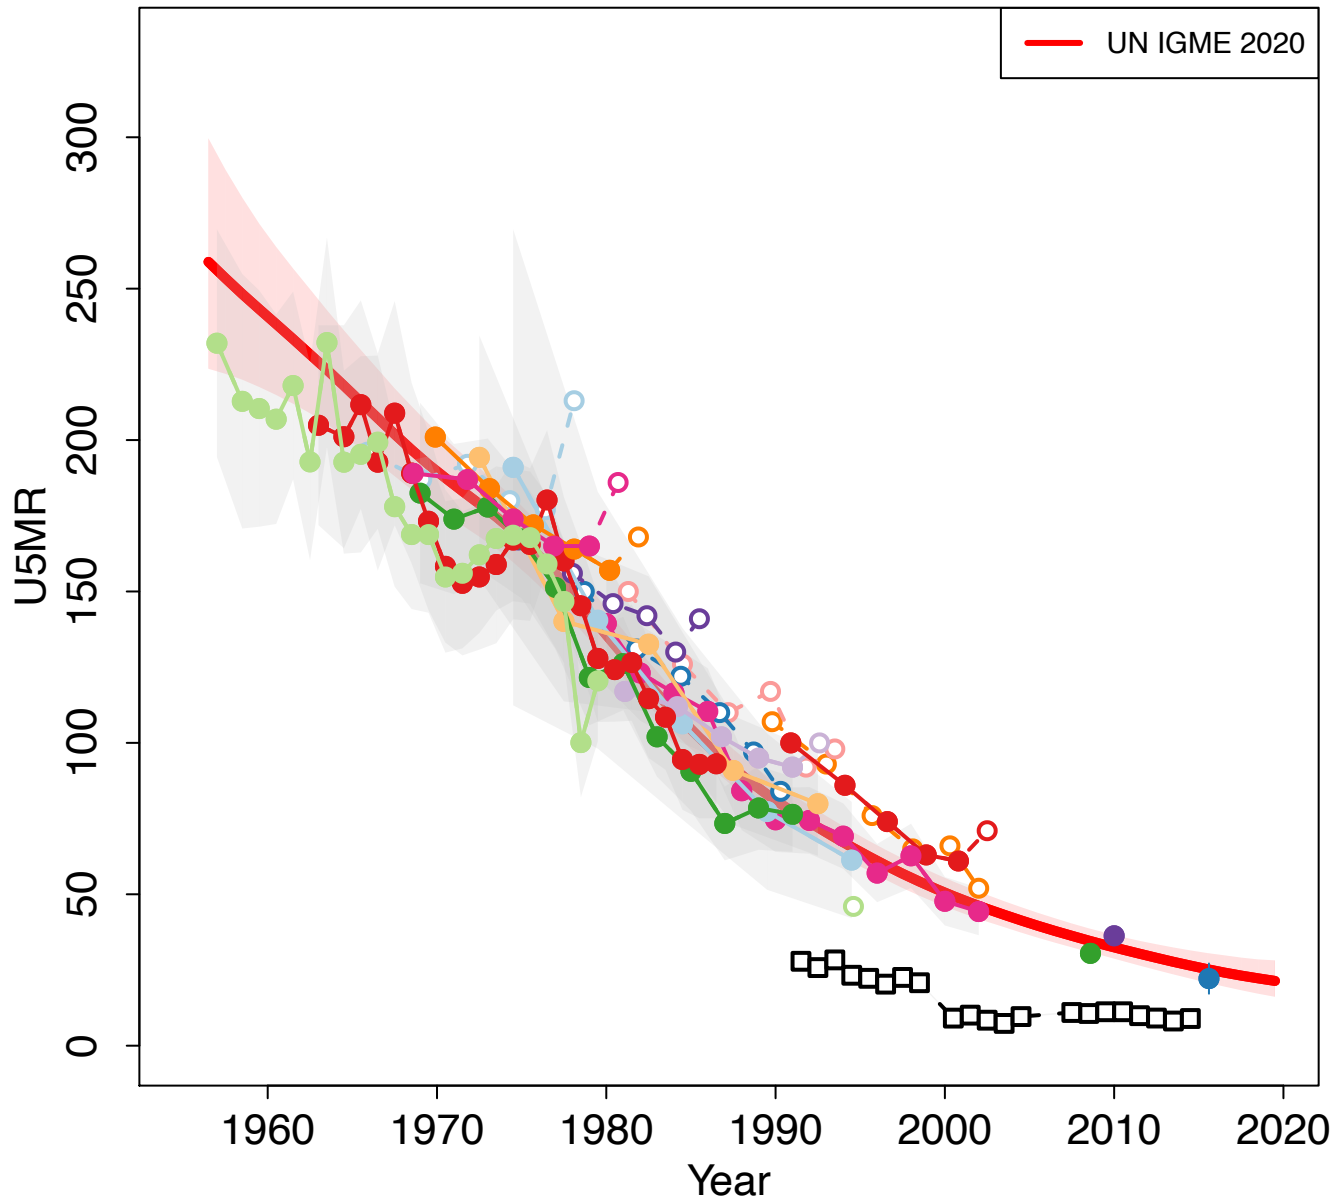

# Zoomed in

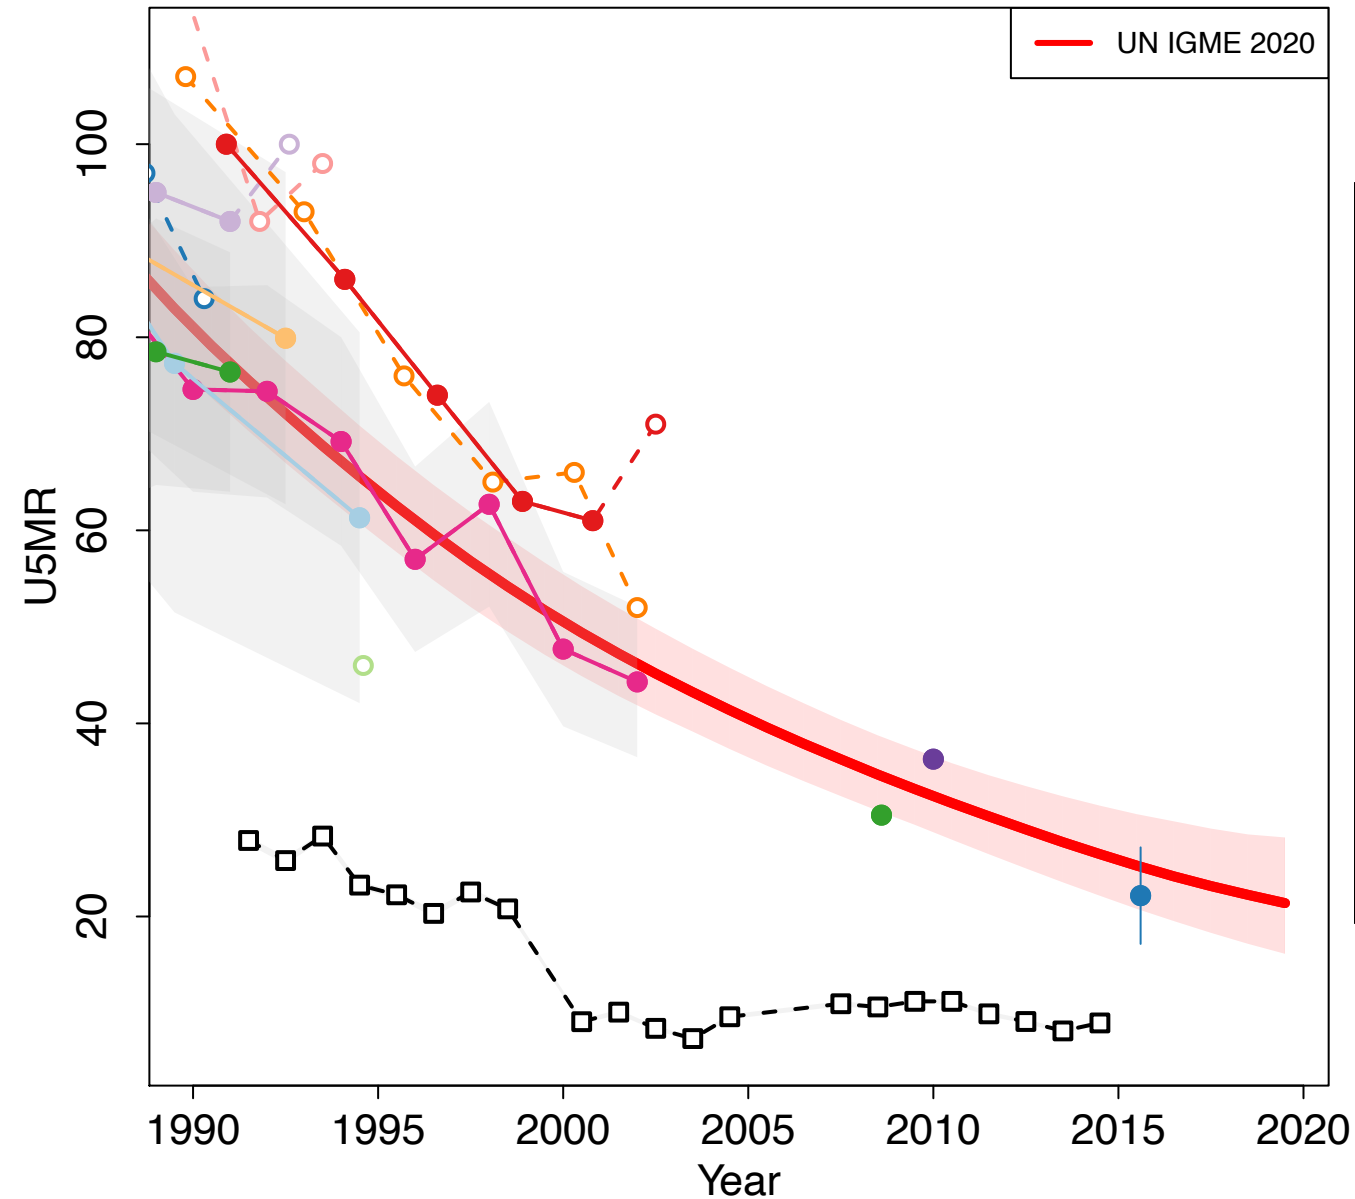

- World Fertility Survey 1980 (Other DHS Direct)
- World Fertility Survey 1980 (Other DHS Indirect)
- Census 1982 (Census Indirect)
- Contraceptive Prevalence Survey 1983 (Others Indirect)
- Demographic and Health Survey 1987 (DHS Direct)
- Demographic and Health Survey 1987 (DHS Indirect)
- Demographic and Health Survey 1992 (DHS Direct)
- Demographic and Health Survey 1992 (DHS Indirect)
- Census 1994 (Census Indirect)
- Demographic and Health Survey 1995 (DHS Direct)
- Demographic and Health Survey 1995 (DHS Indirect)
- PAPG ENSME grand-echantillon 1996 1996 (Others Direct)
- PAPCHILD Maternal and Child Health Survey 1997 (Others Direct)
- Demographic and Health Survey 2003–2004 (DHS Direct)
- Demographic and Health Survey 2003–2004 (DHS Indirect)
- Census 2004 (Census Indirect)
- National Demographic Survey with repeated passages 2009–2010 (Others Household Deaths)
- National Survey on Population and Family Health 2011 (Others Direct)
- National Survey on Population and Family Health 2018 (Others Direct)
- VR WHO

### Mozambique

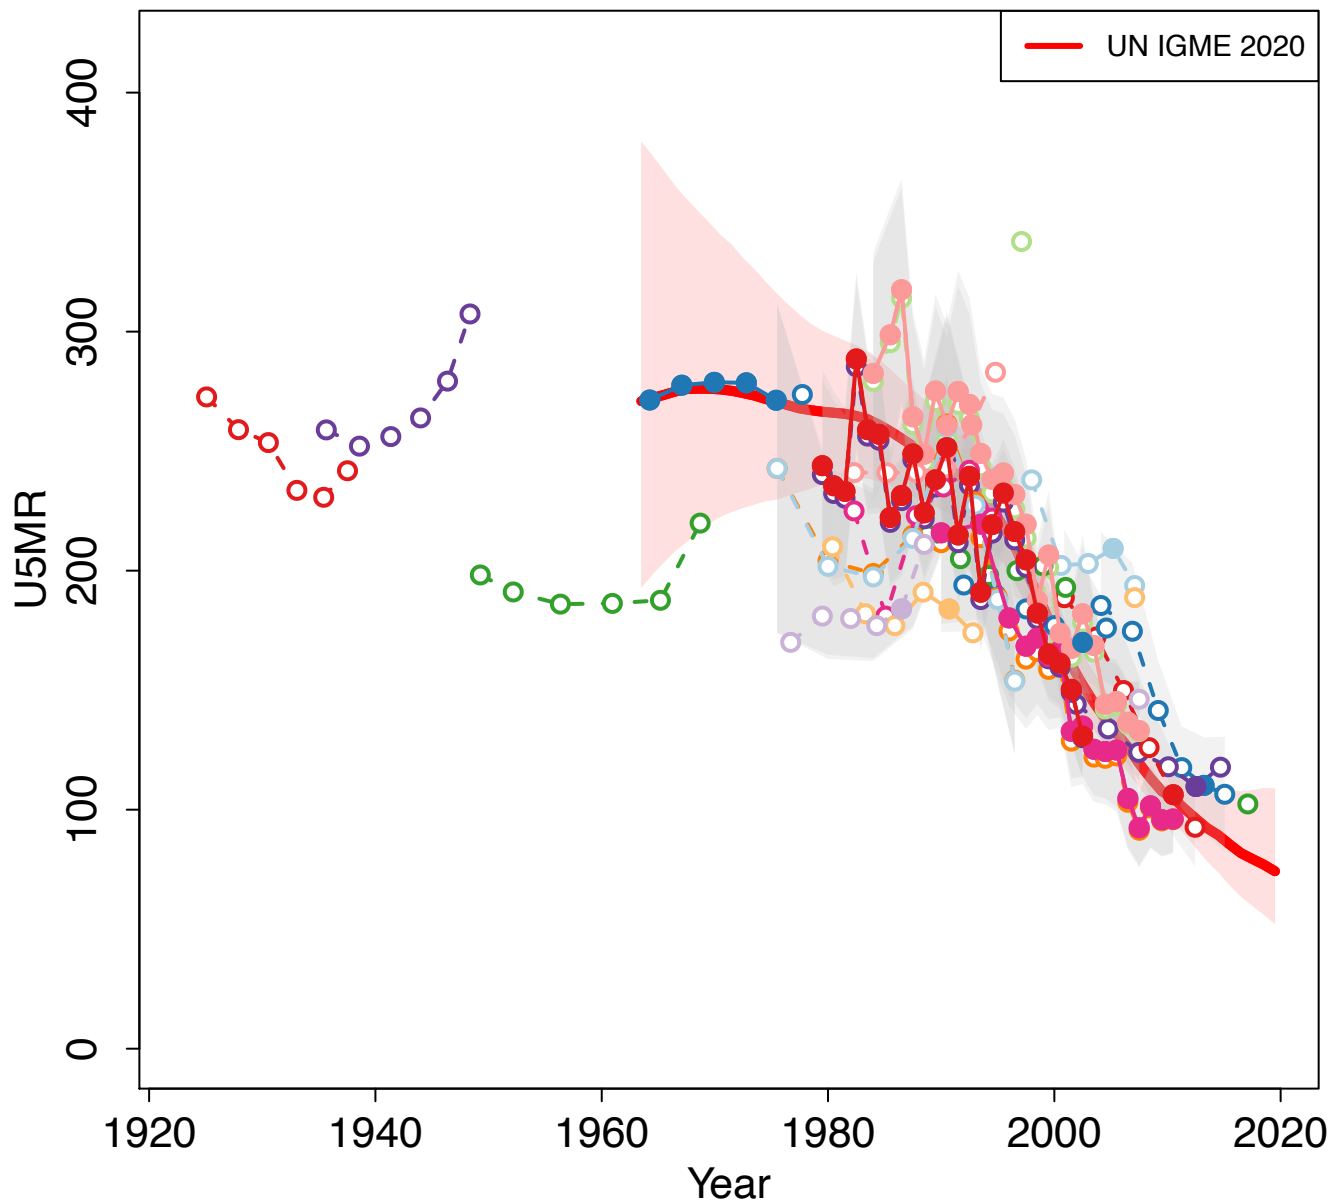

### Zoomed in

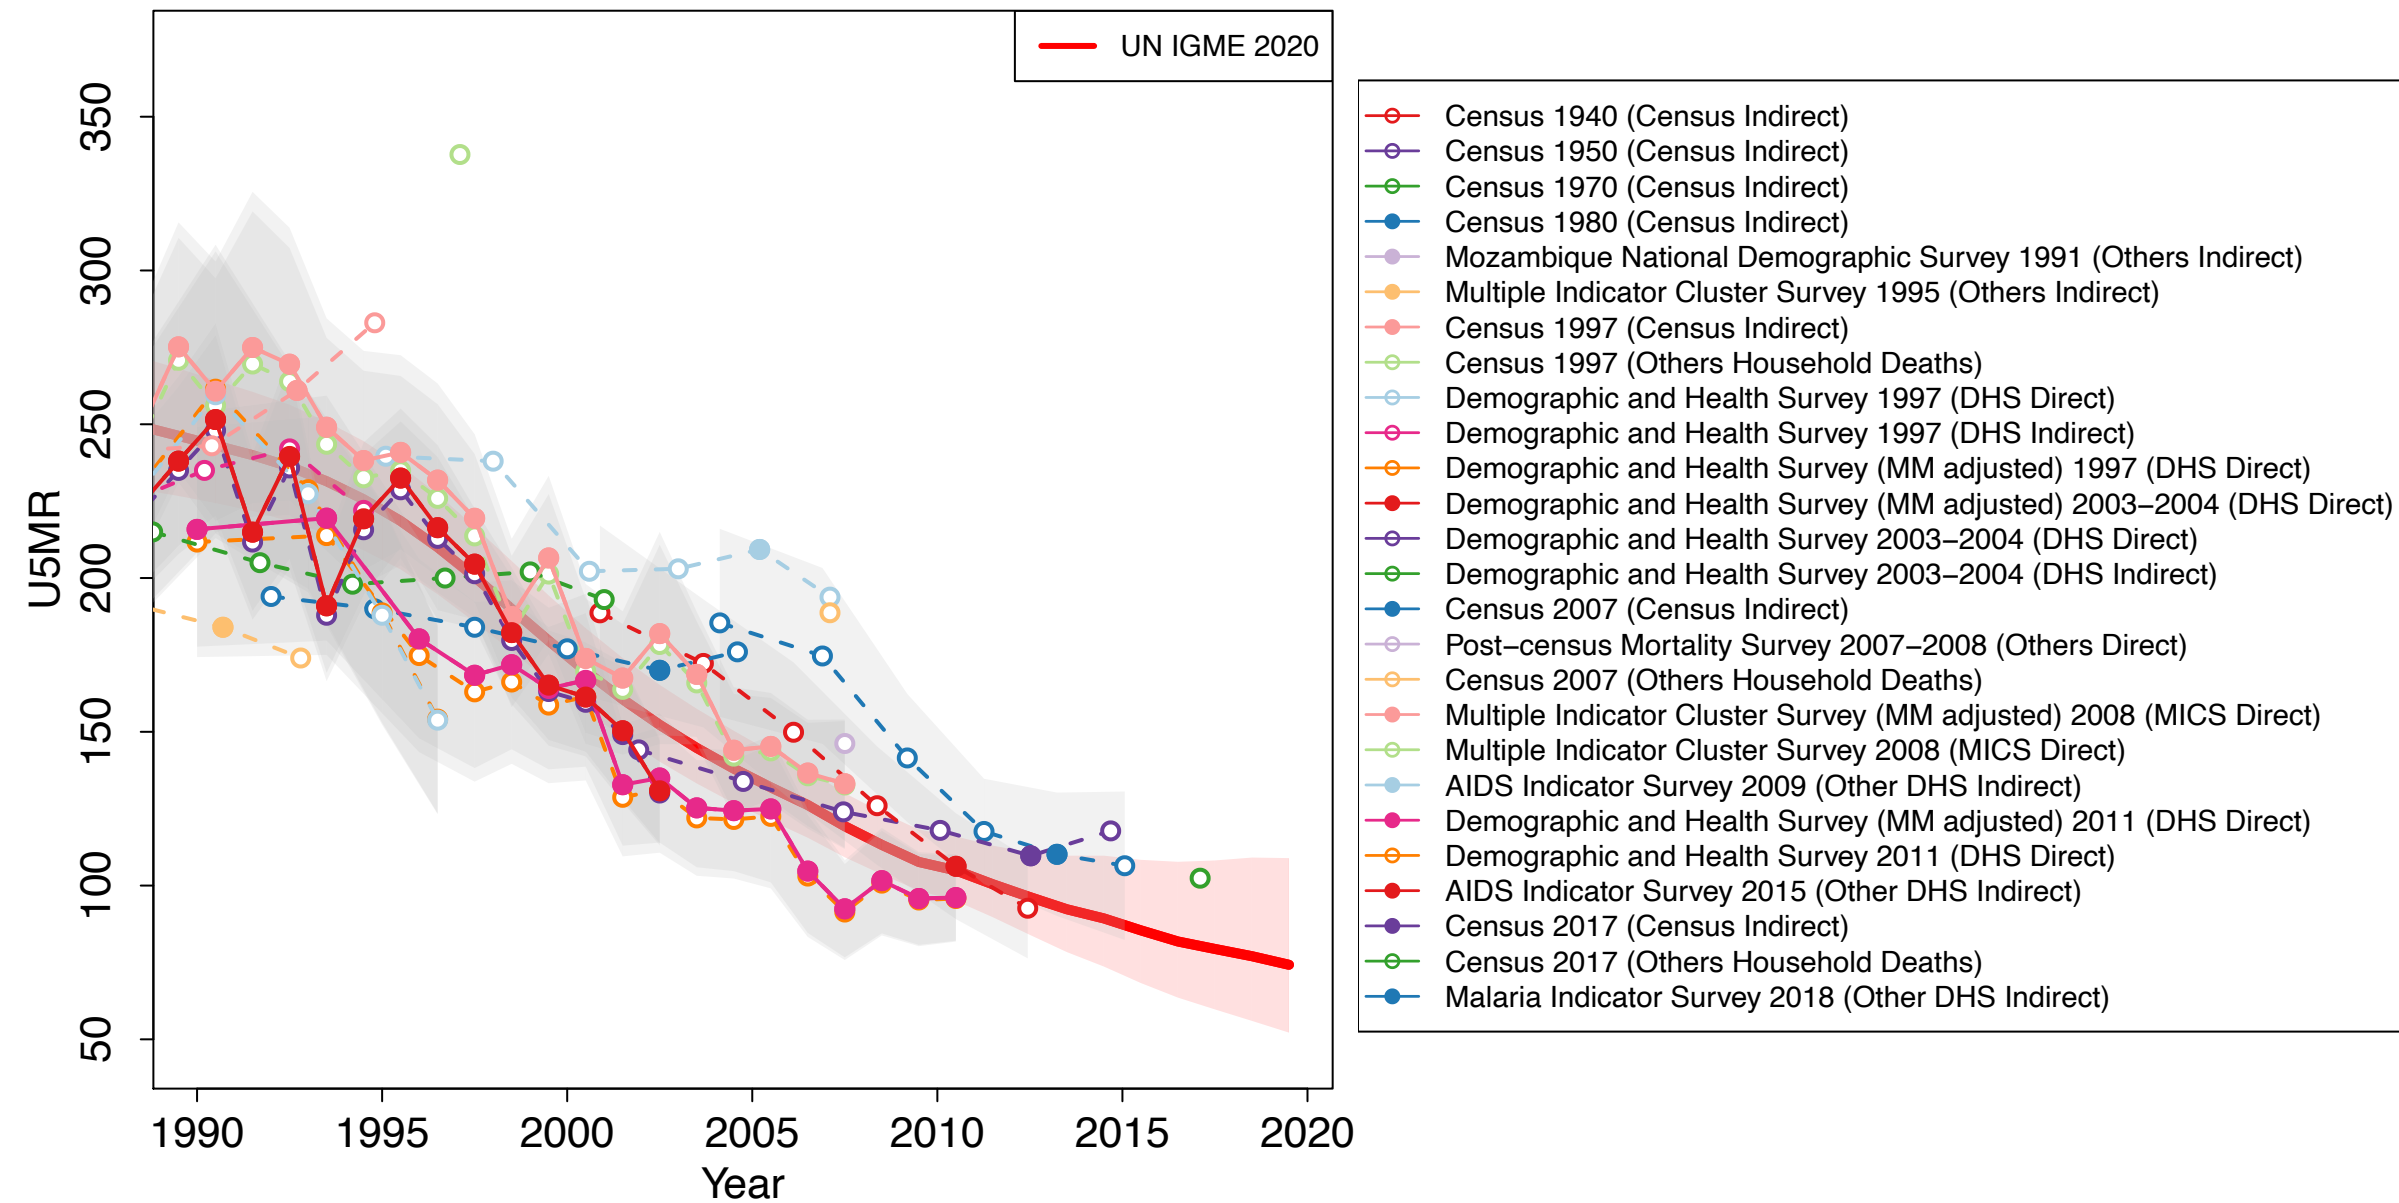



### Myanmar

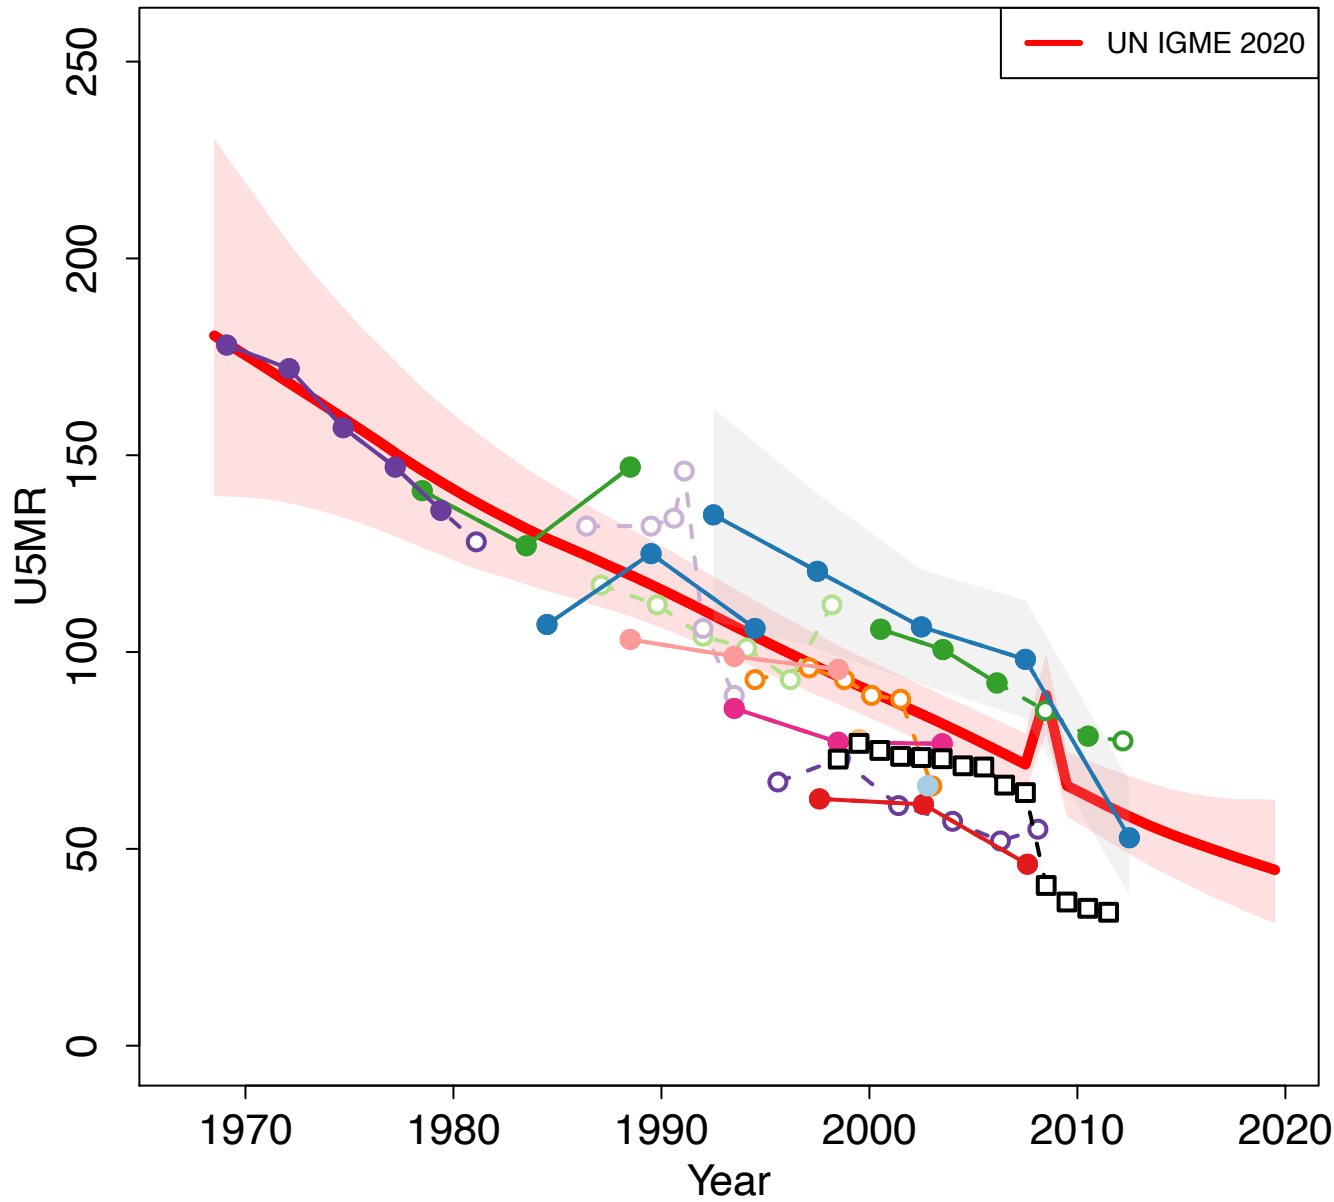

### Zoomed in

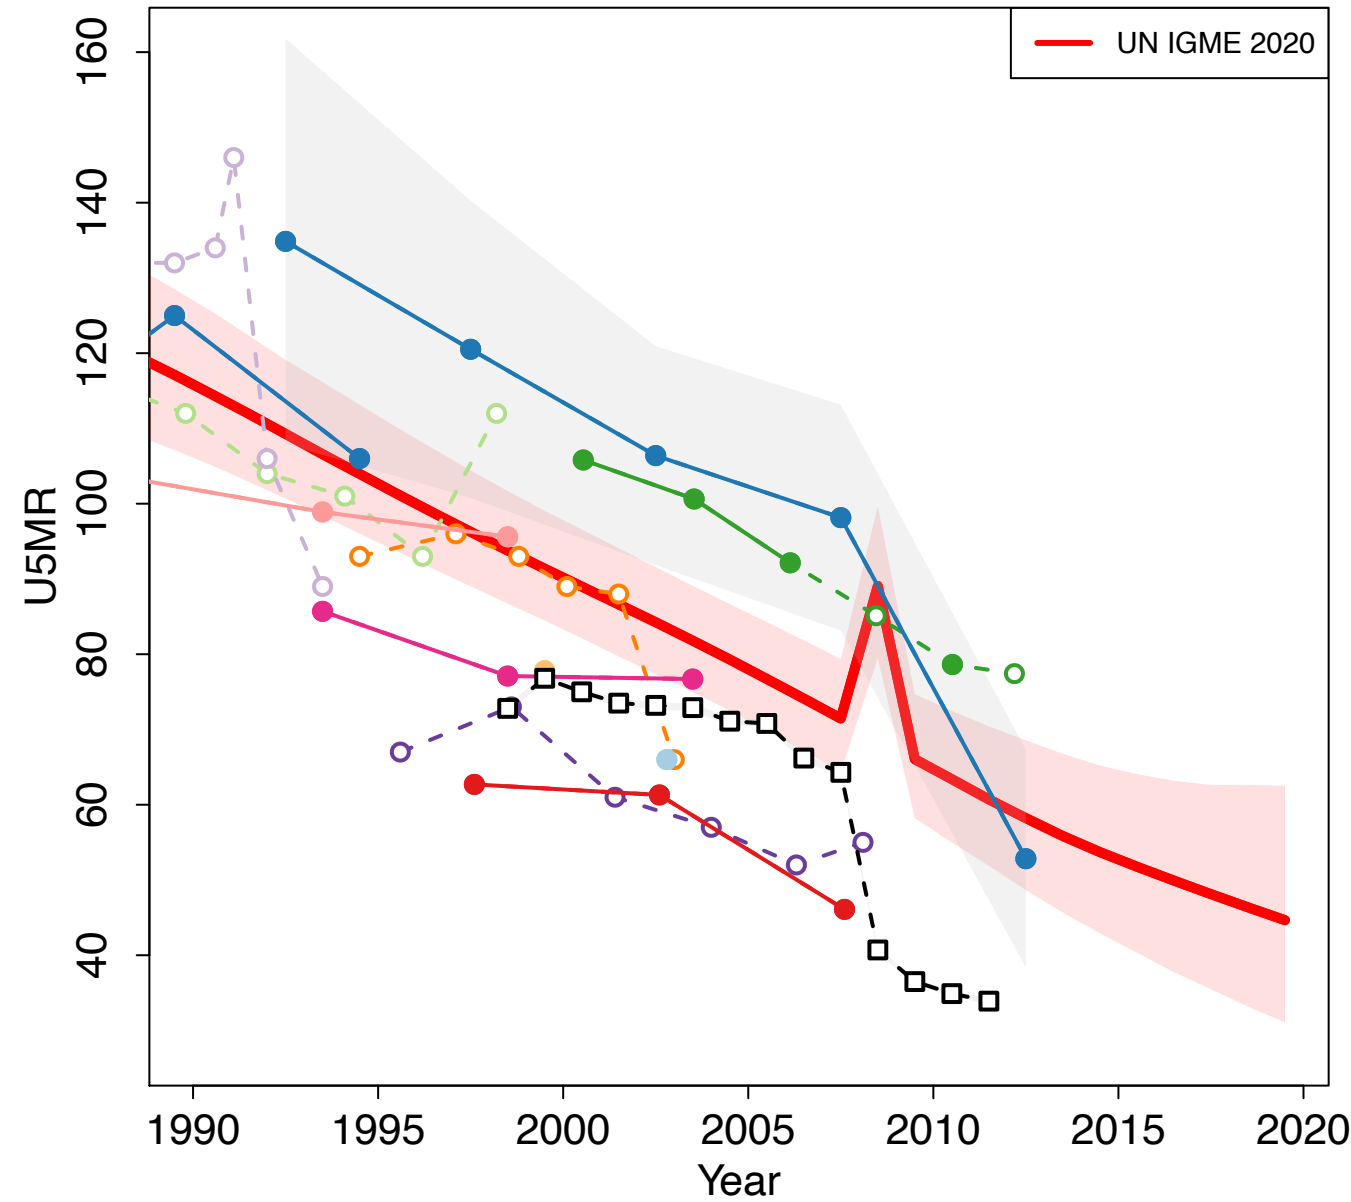

### Namibia

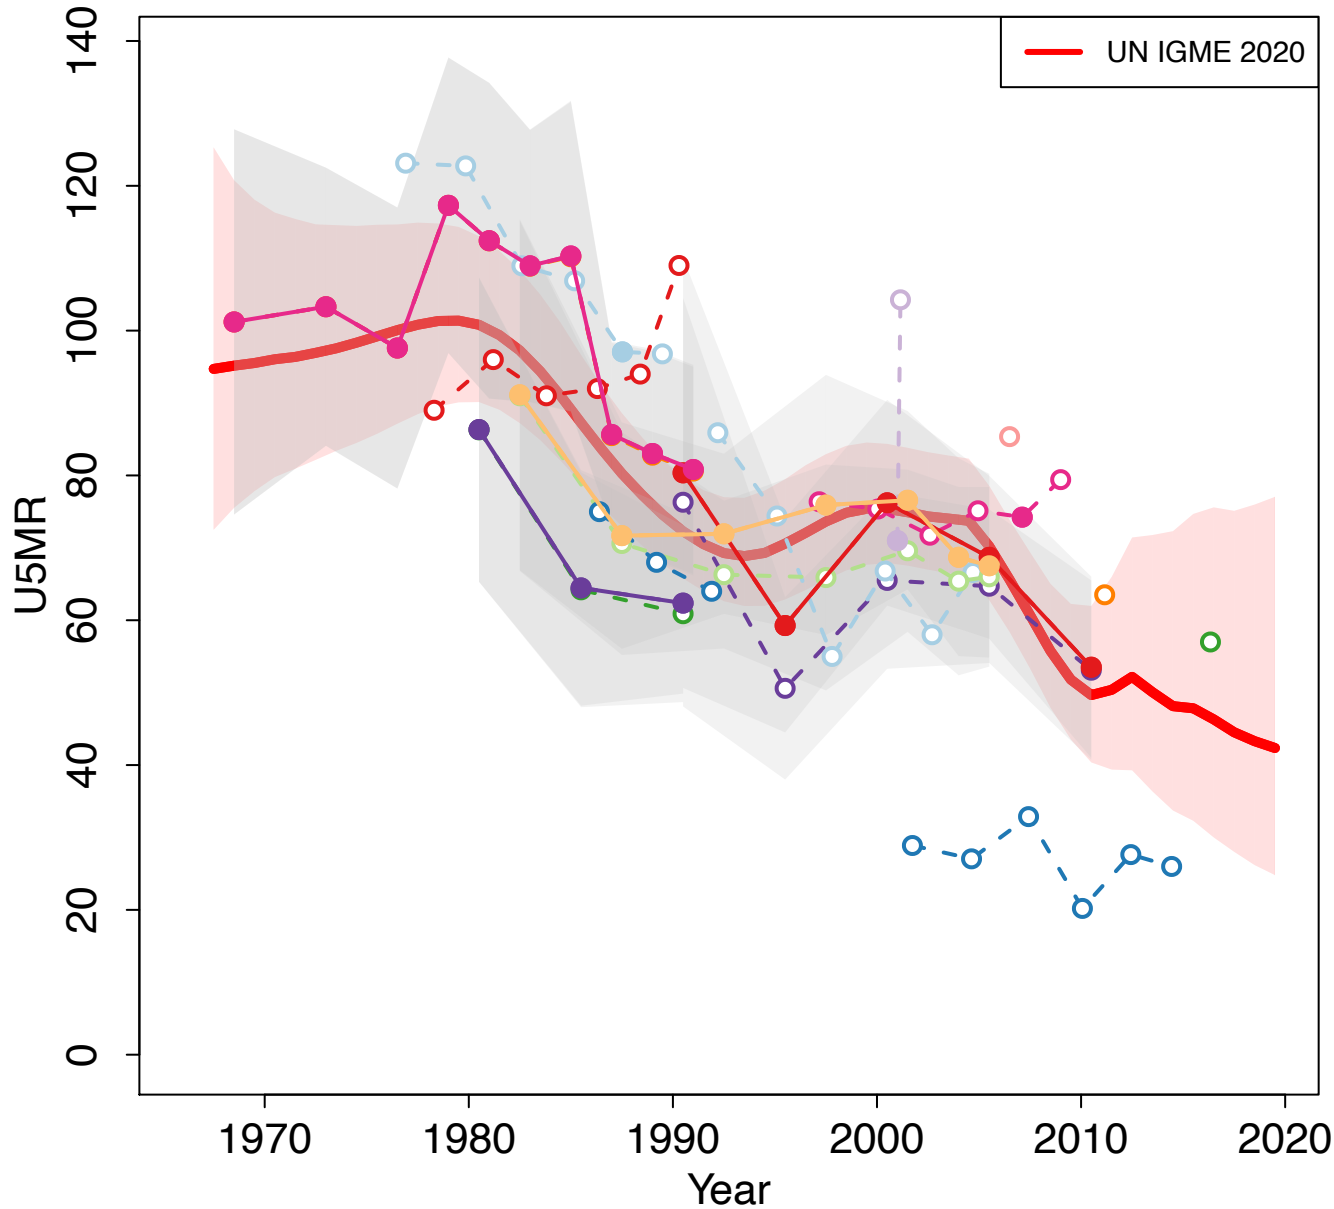

### Zoomed in

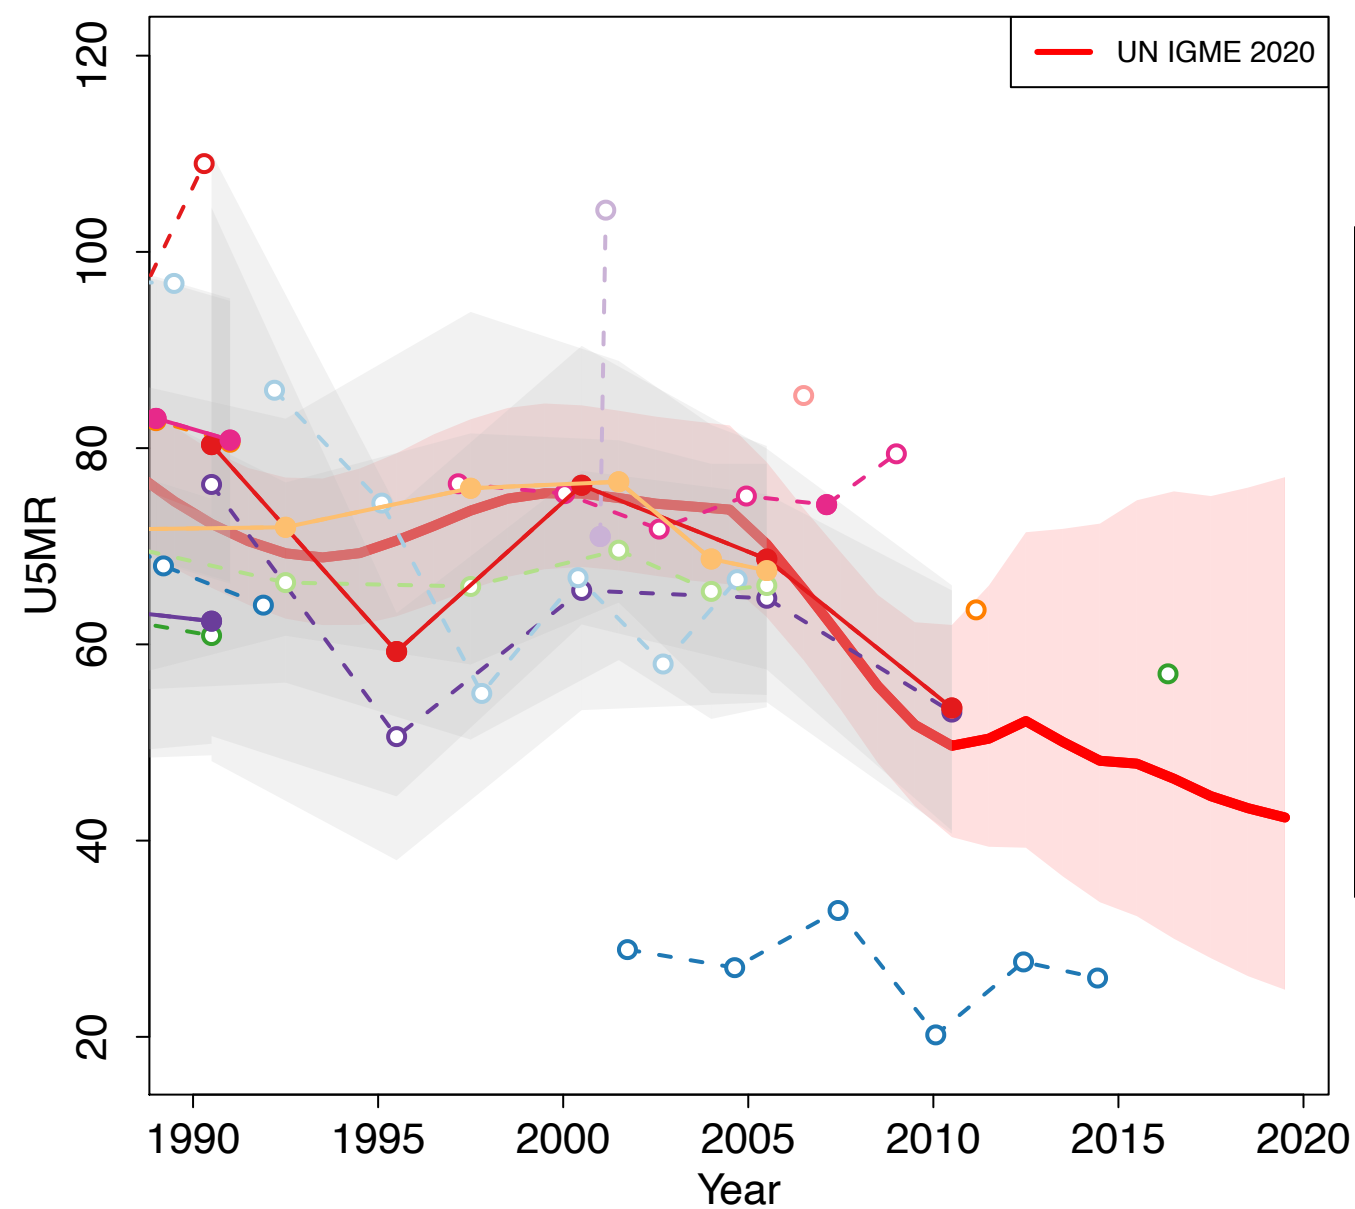

- Census 1991 (Census Indirect)
- Demographic and Health Survey (MM adjusted) 1992 (DHS Direct)
- Demographic and Health Survey 1992 (DHS Direct)
- Demographic and Health Survey 1992 (DHS Indirect)
- Demographic and Health Survey (MM adjusted) 2000 (DHS Direct)
- Demographic and Health Survey 2000 (DHS Direct)
- Demographic and Health Survey 2000 (DHS Indirect)
- Census 2001 (Others Household Deaths)
- Demographic and Health Survey (MM adjusted) 2006–2007 (DHS Direct)
- Demographic and Health Survey 2006–2007 (Others Household Deaths)
- Demographic and Health Survey 2006–2007 (DHS Direct)
- Demographic and Health Survey 2006–2007 (DHS Indirect)
- Census 2011 (Census Indirect)
- Census 2011 (Others Household Deaths)
- Demographic and Health Survey (MM adjusted) 2013 (DHS Direct)
- Demographic and Health Survey 2013 (DHS Direct)
- Inter-censal Demographic Survey 2016 (Others Household Deaths)
- Inter-censal Demographic Survey 2016 (Others Indirect)

### Nauru

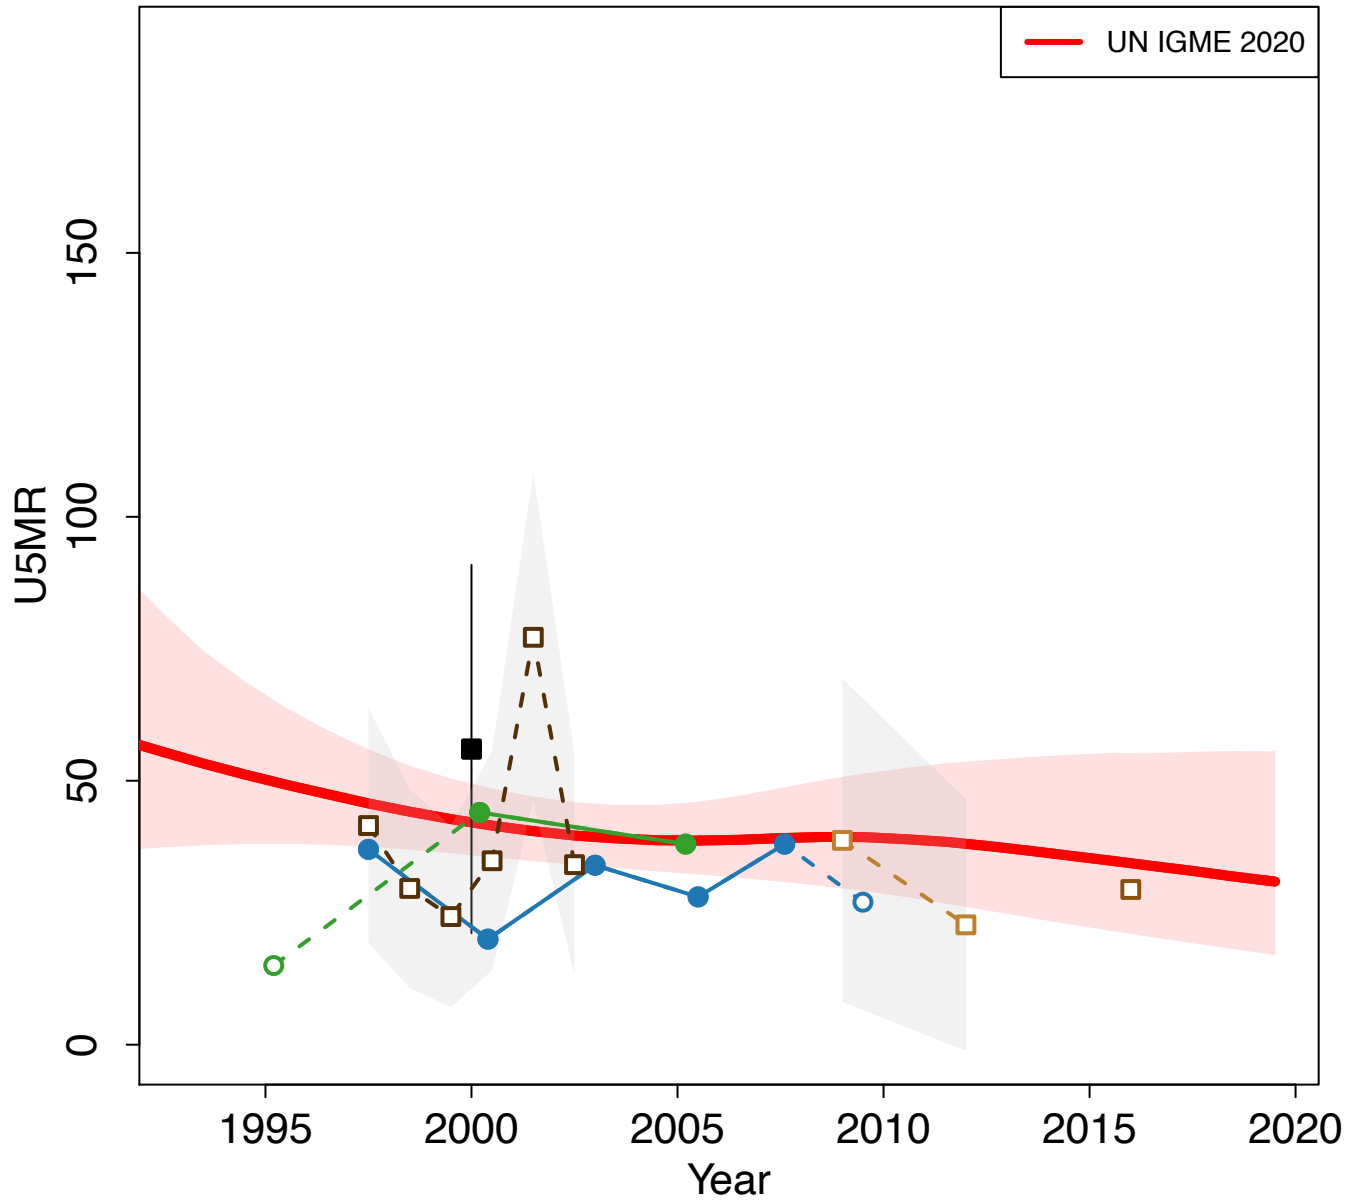

### Zoomed in

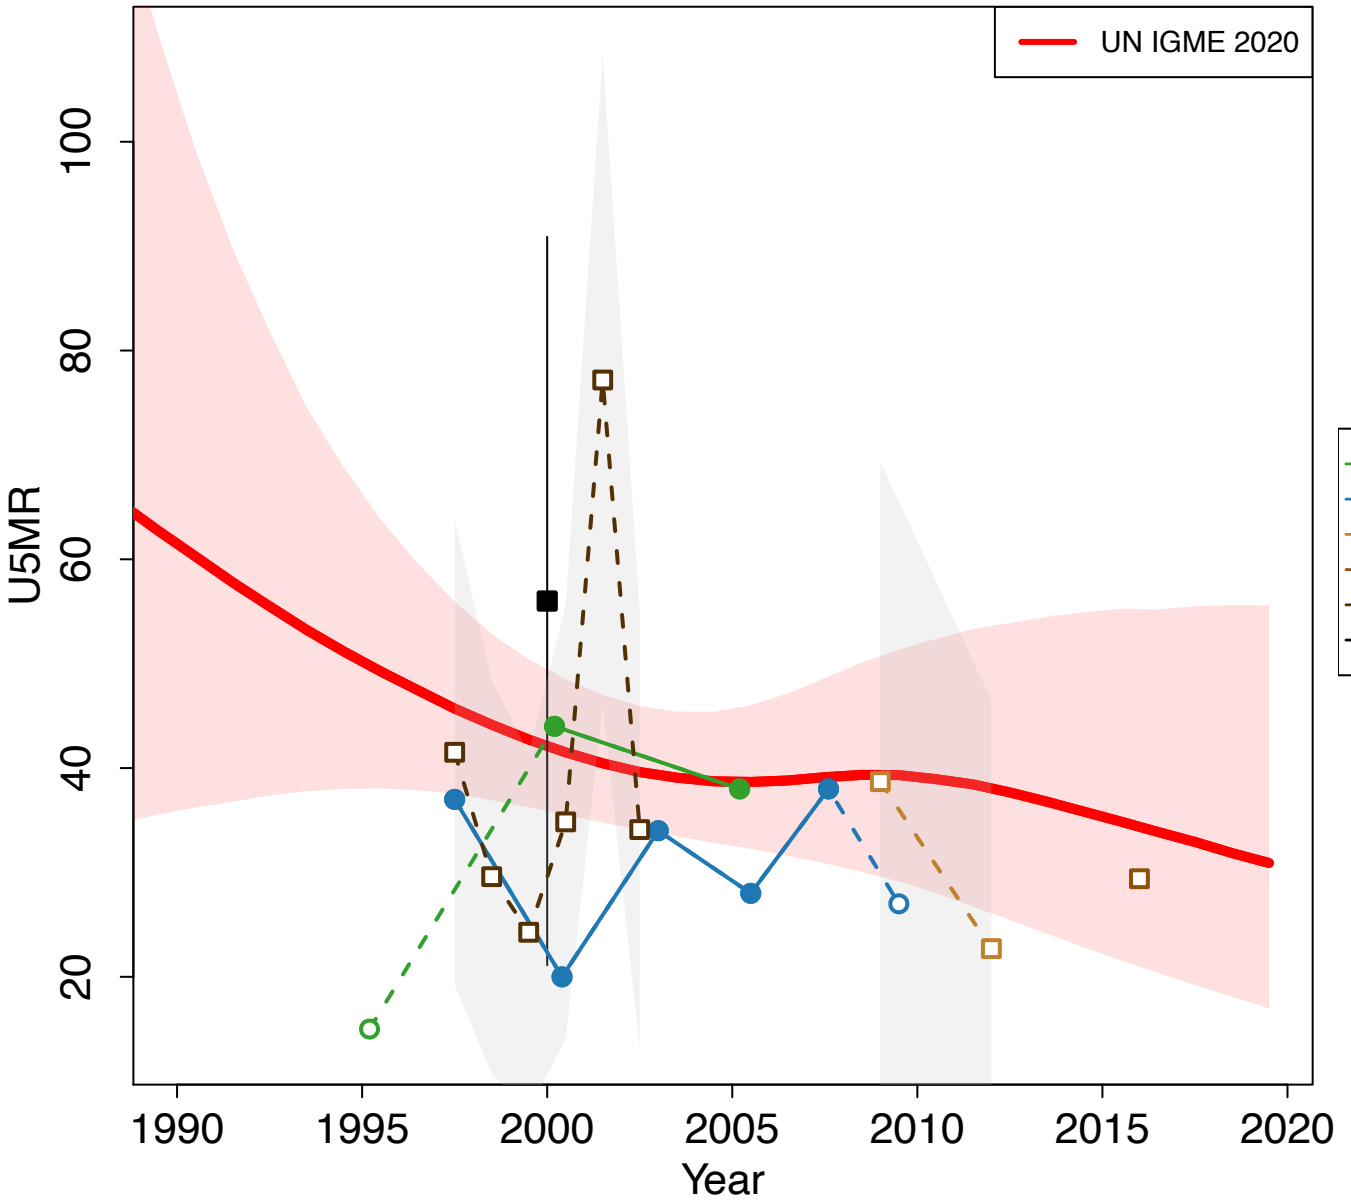

- Demographic and Health Survey 2007 (Other DHS Direct)
- Census 2011 (Census Indirect)
- VR Vital Statistics Report
- VR Vital Statistics Report (preliminary)
- VR WHO
- VR Vital Registration Data and Census

### Nepal

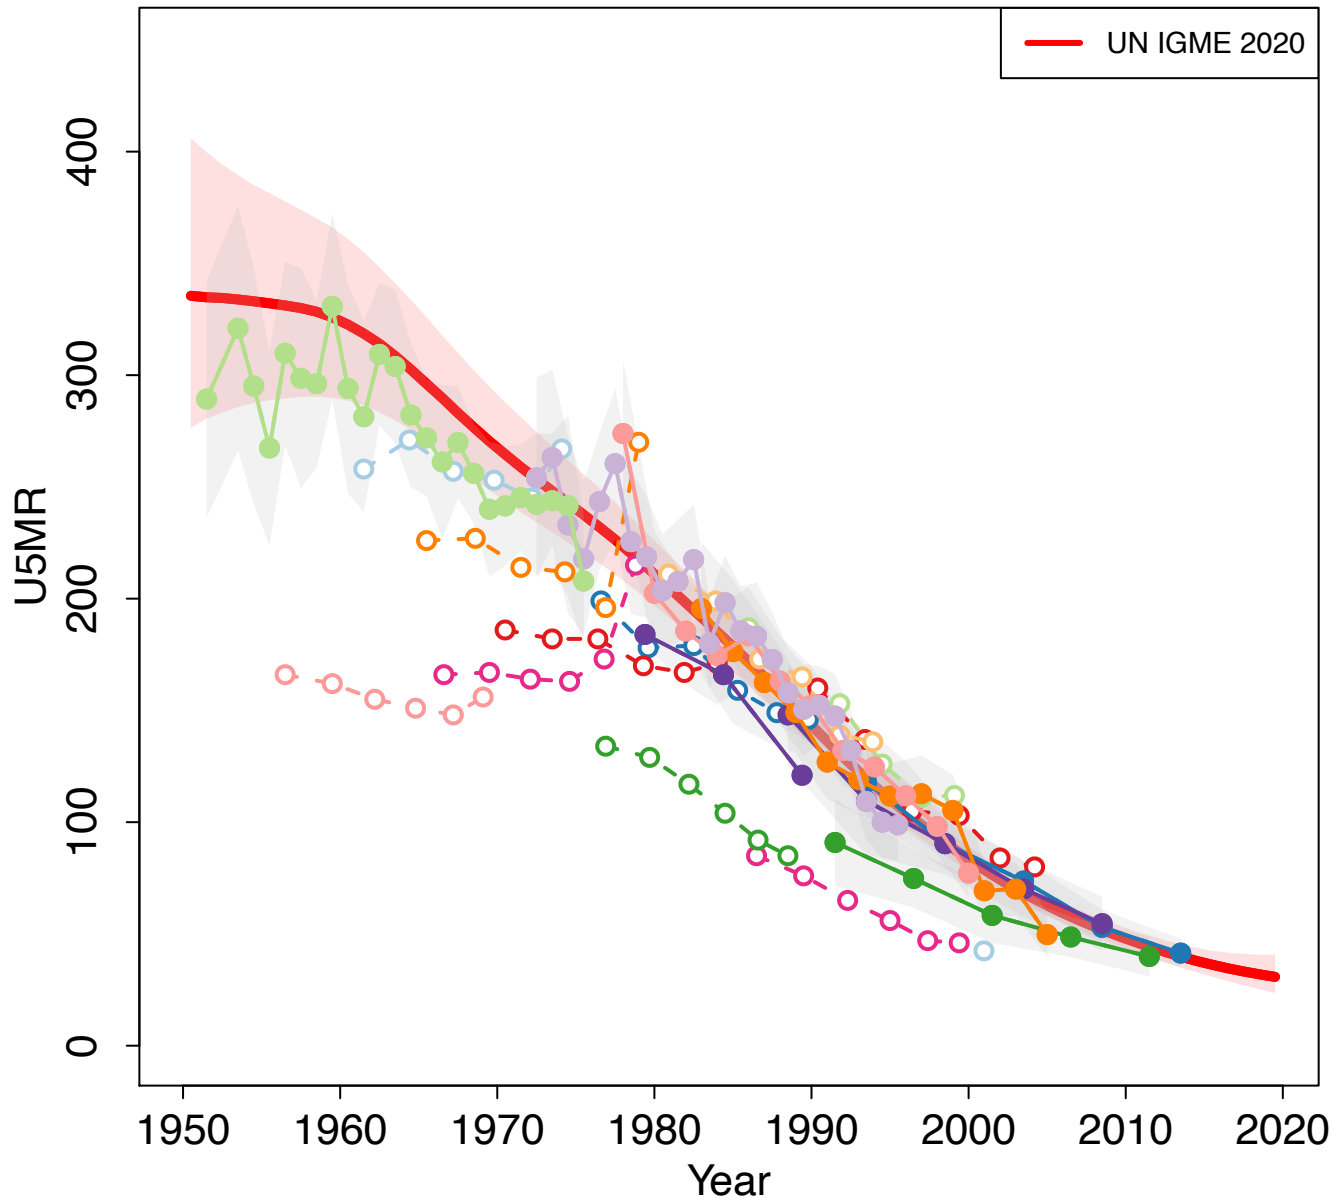

### Zoomed in

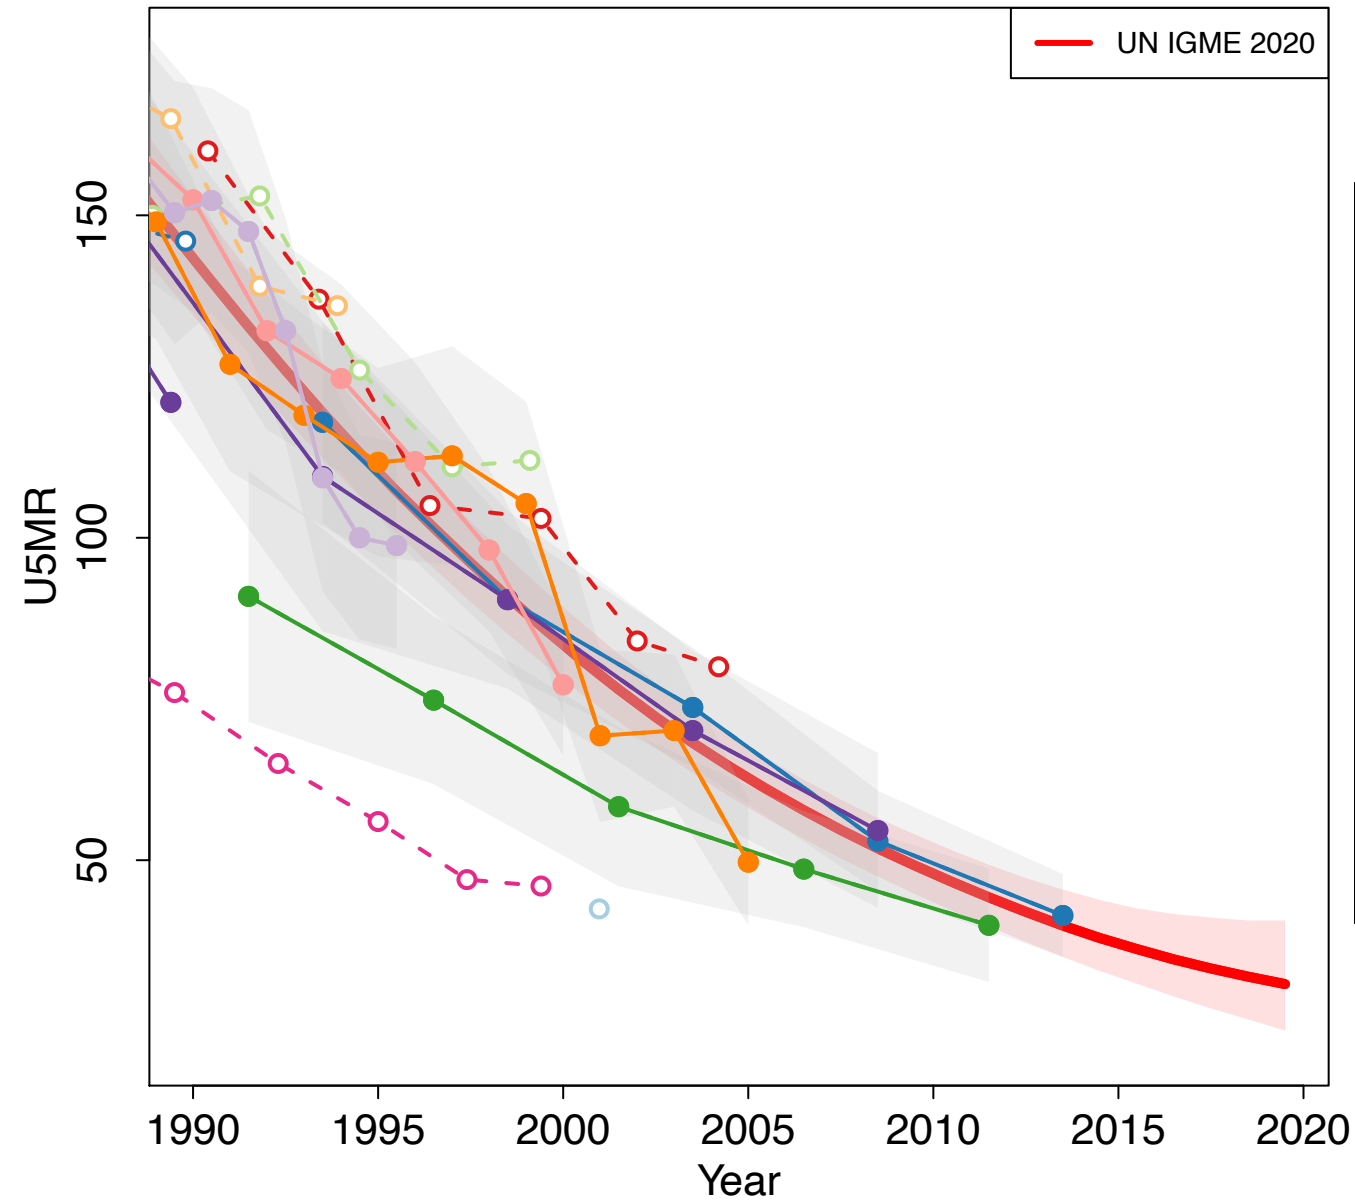

### Netherlands

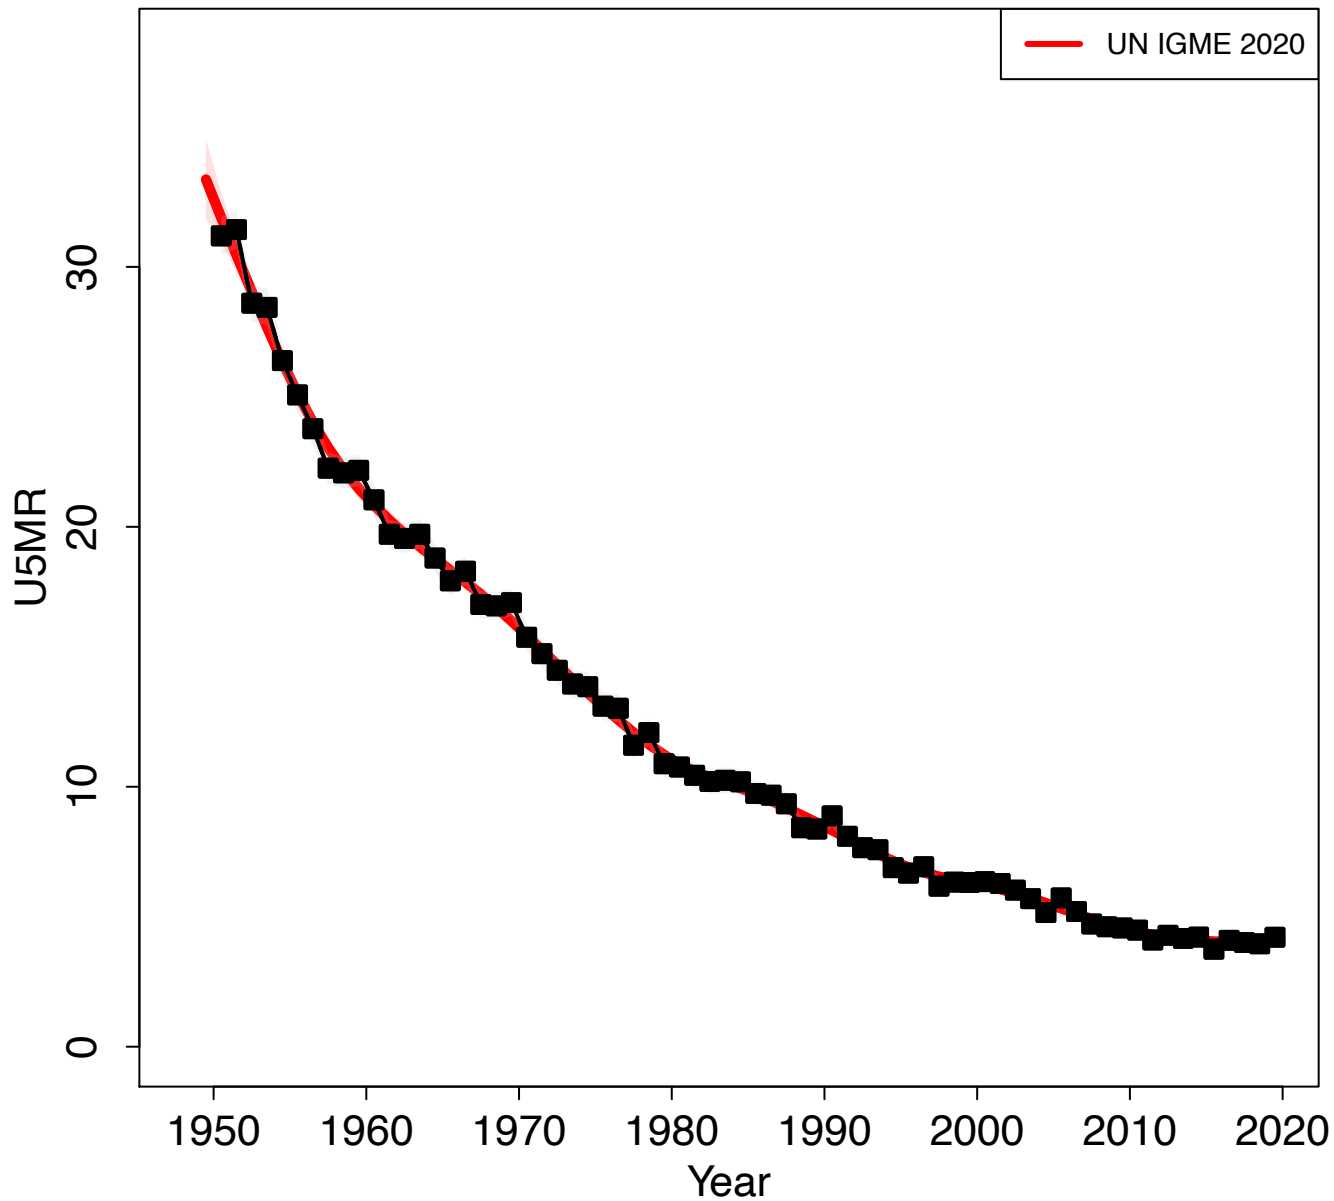

### Zoomed in

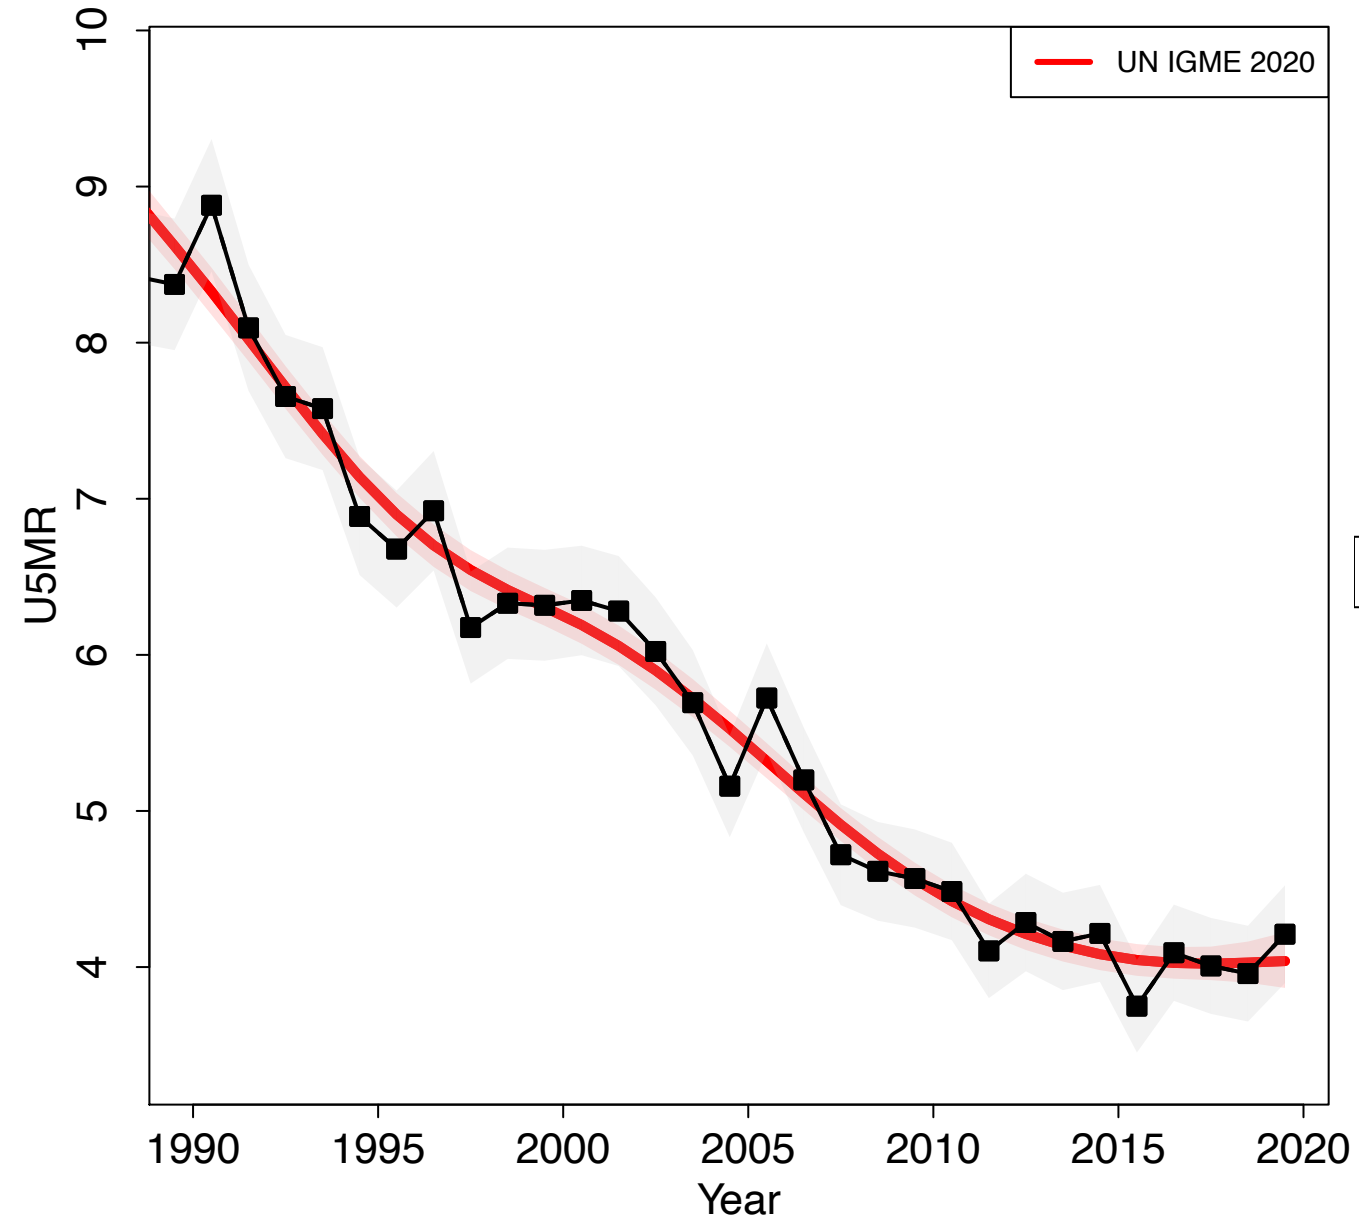

### New Zealand

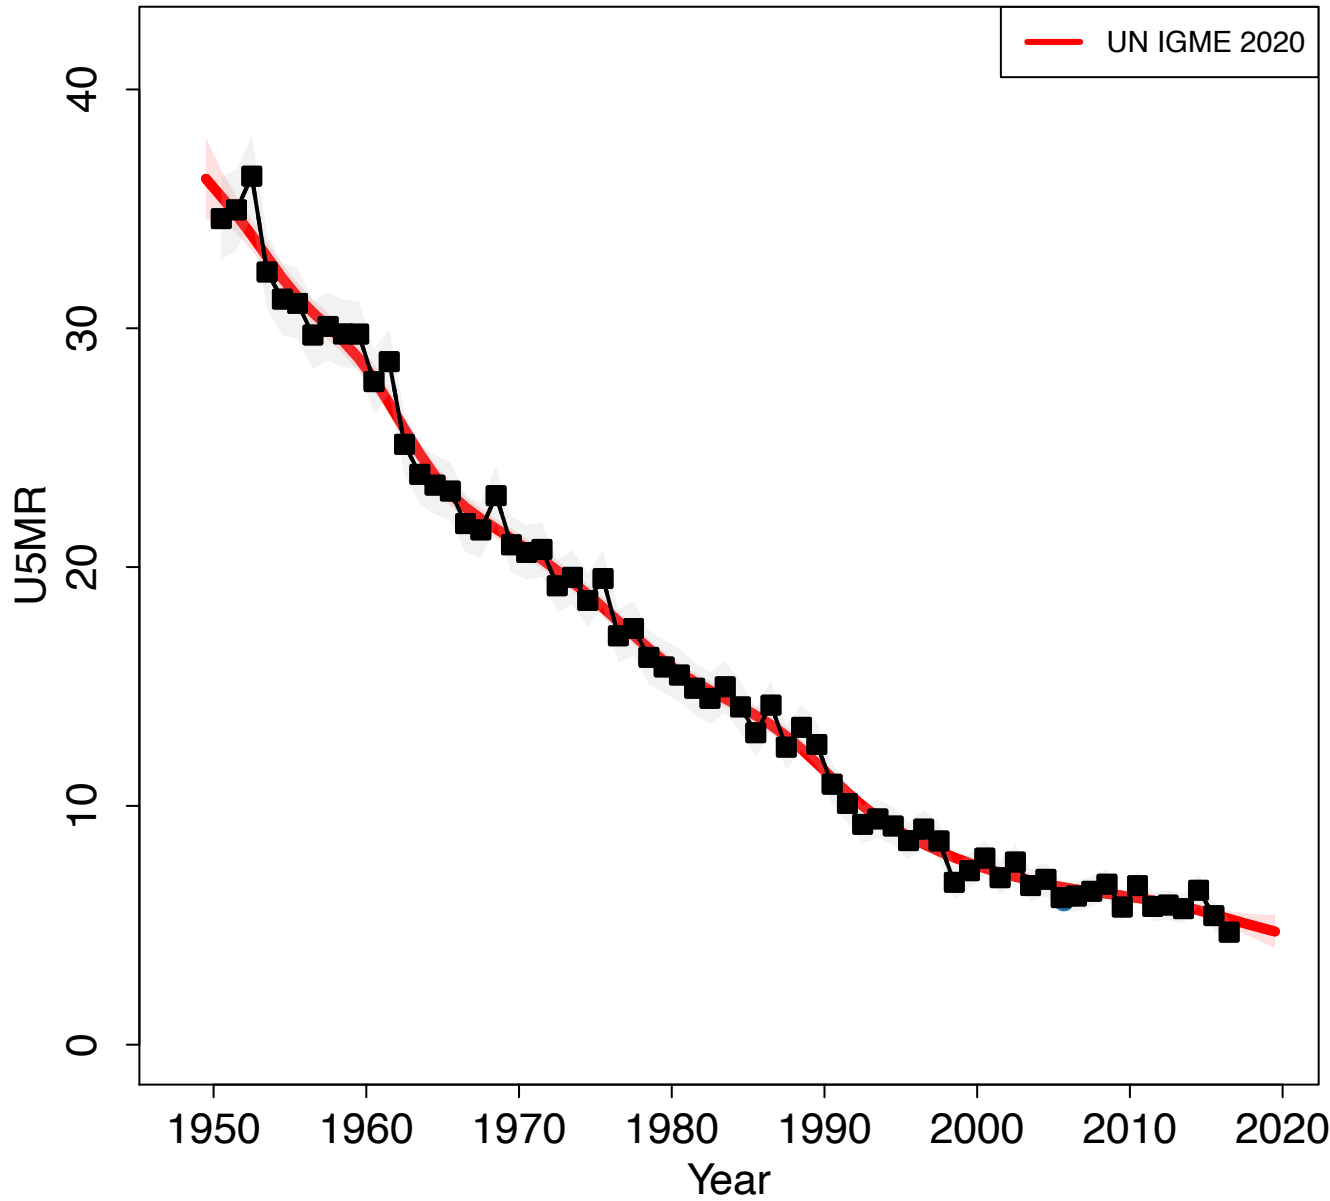

### Zoomed in

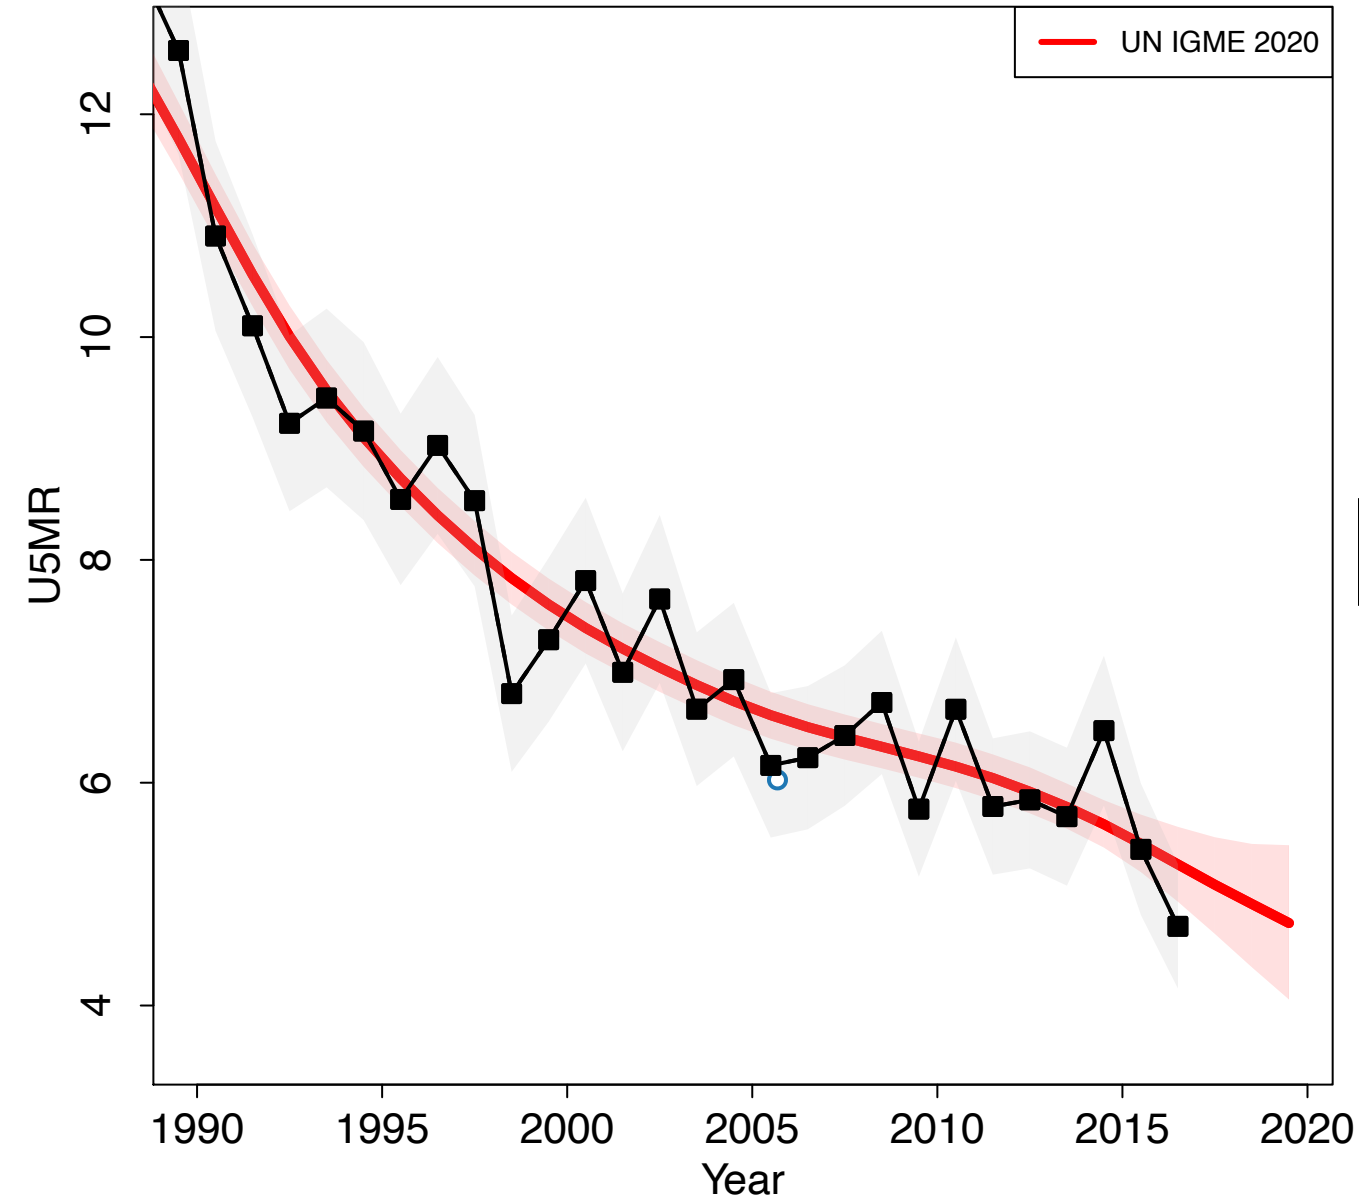

# Nicaragua

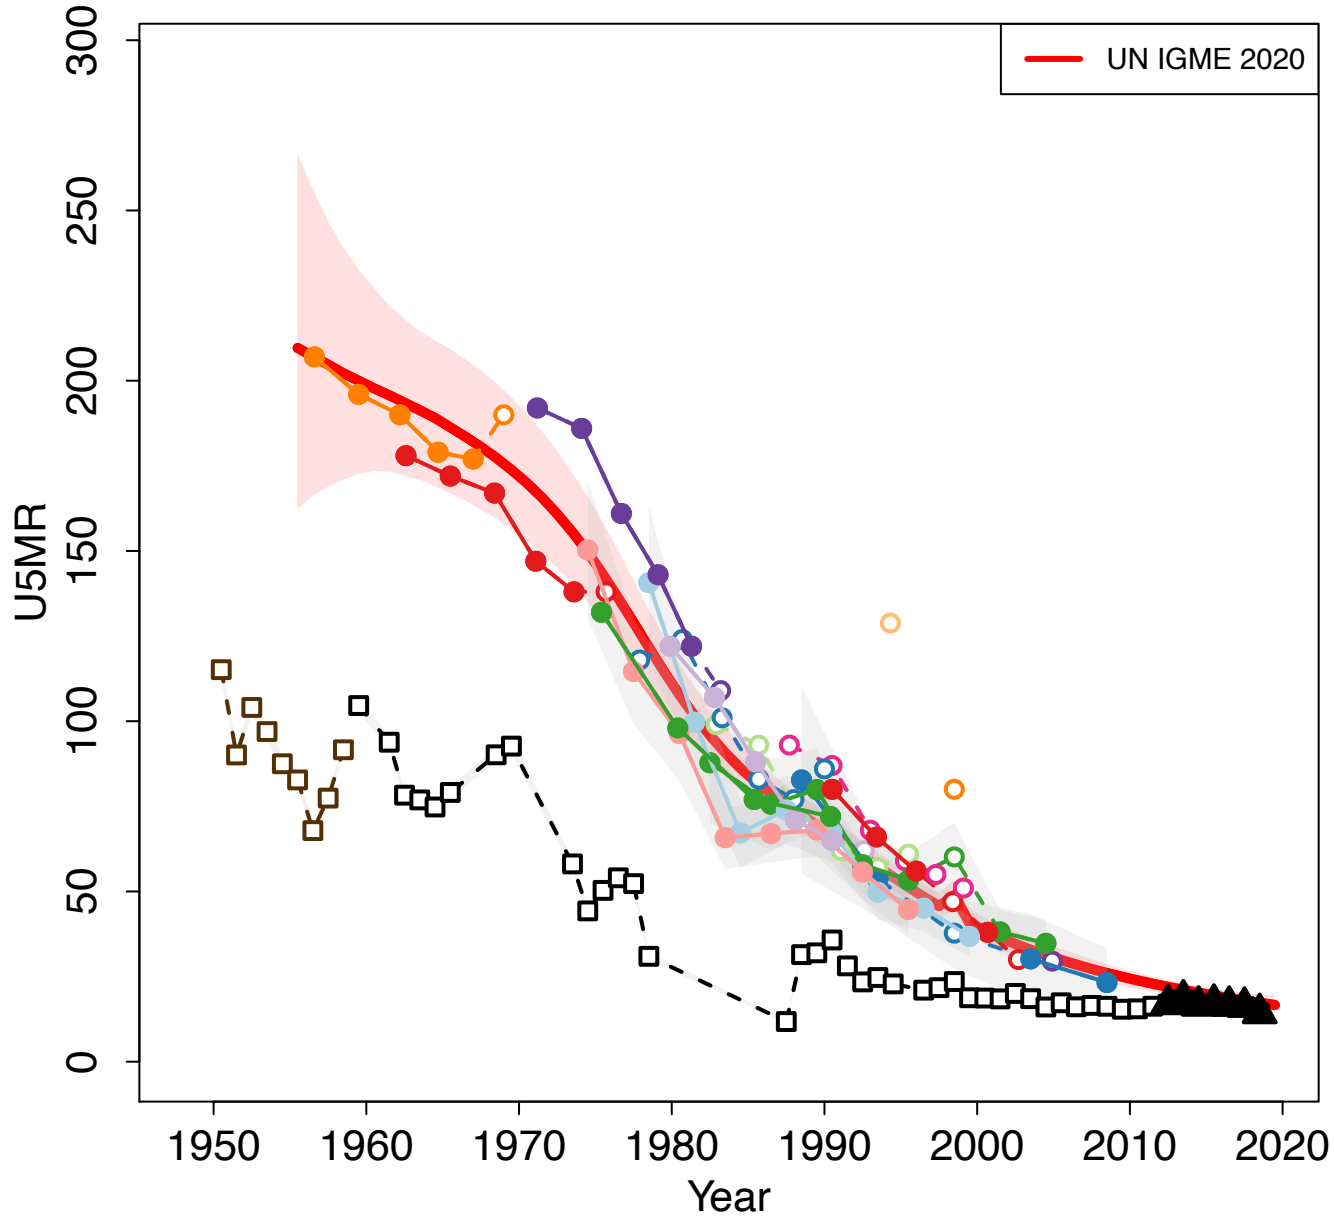

# Zoomed in

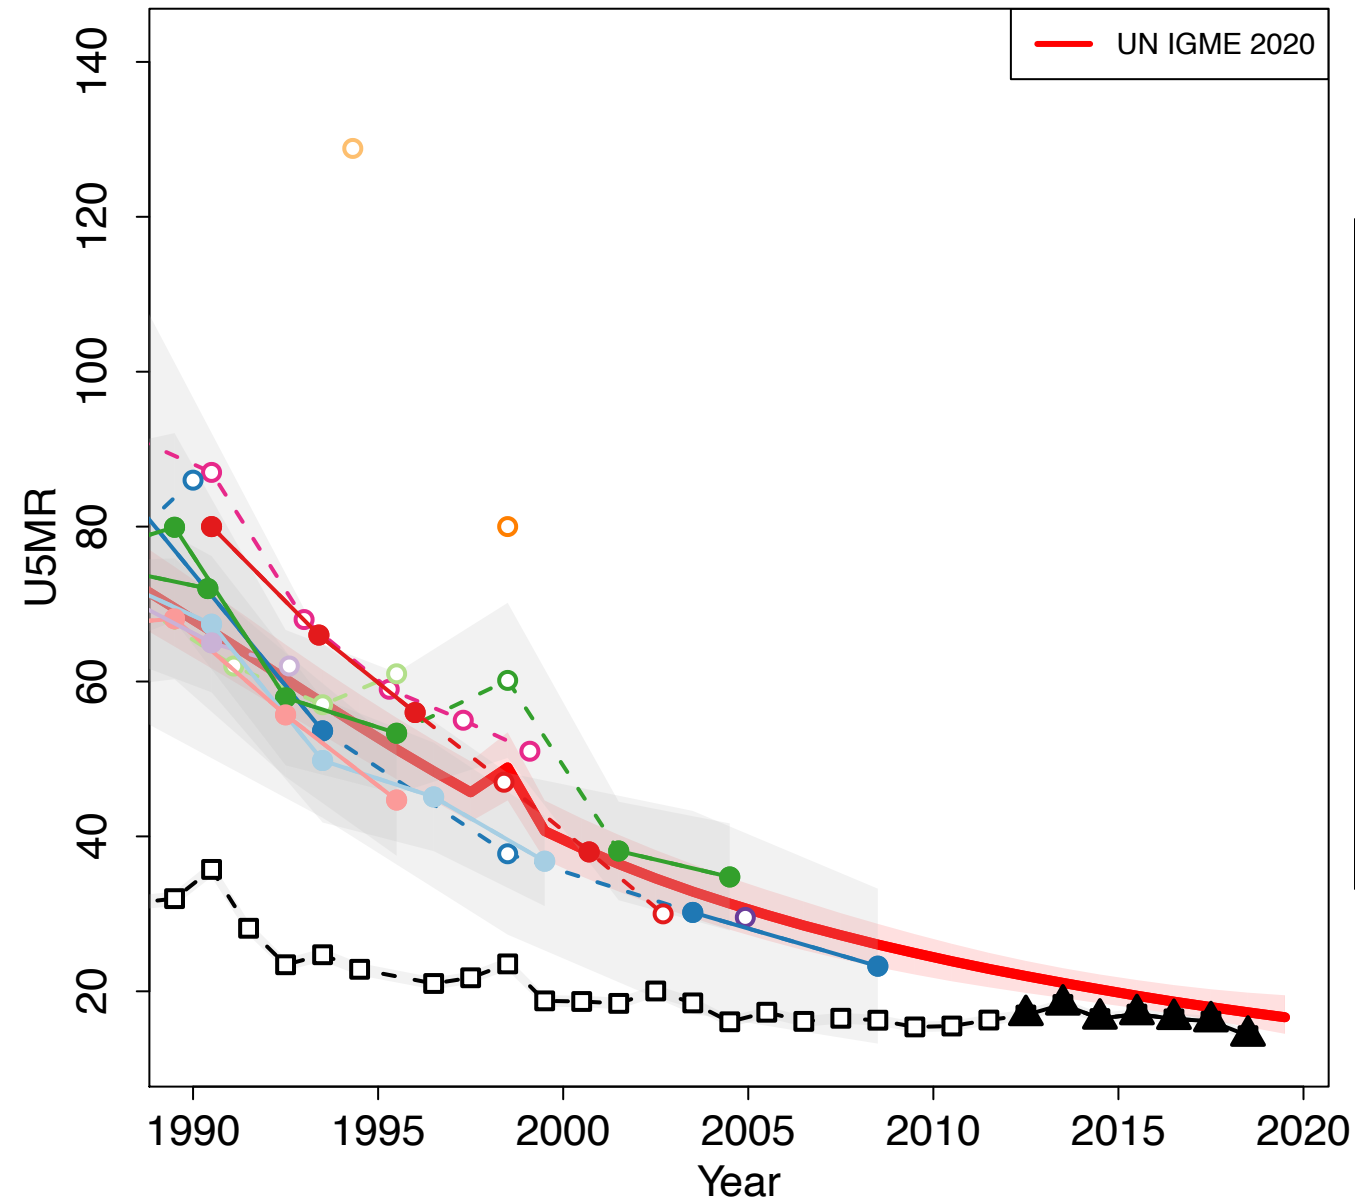

### Niger

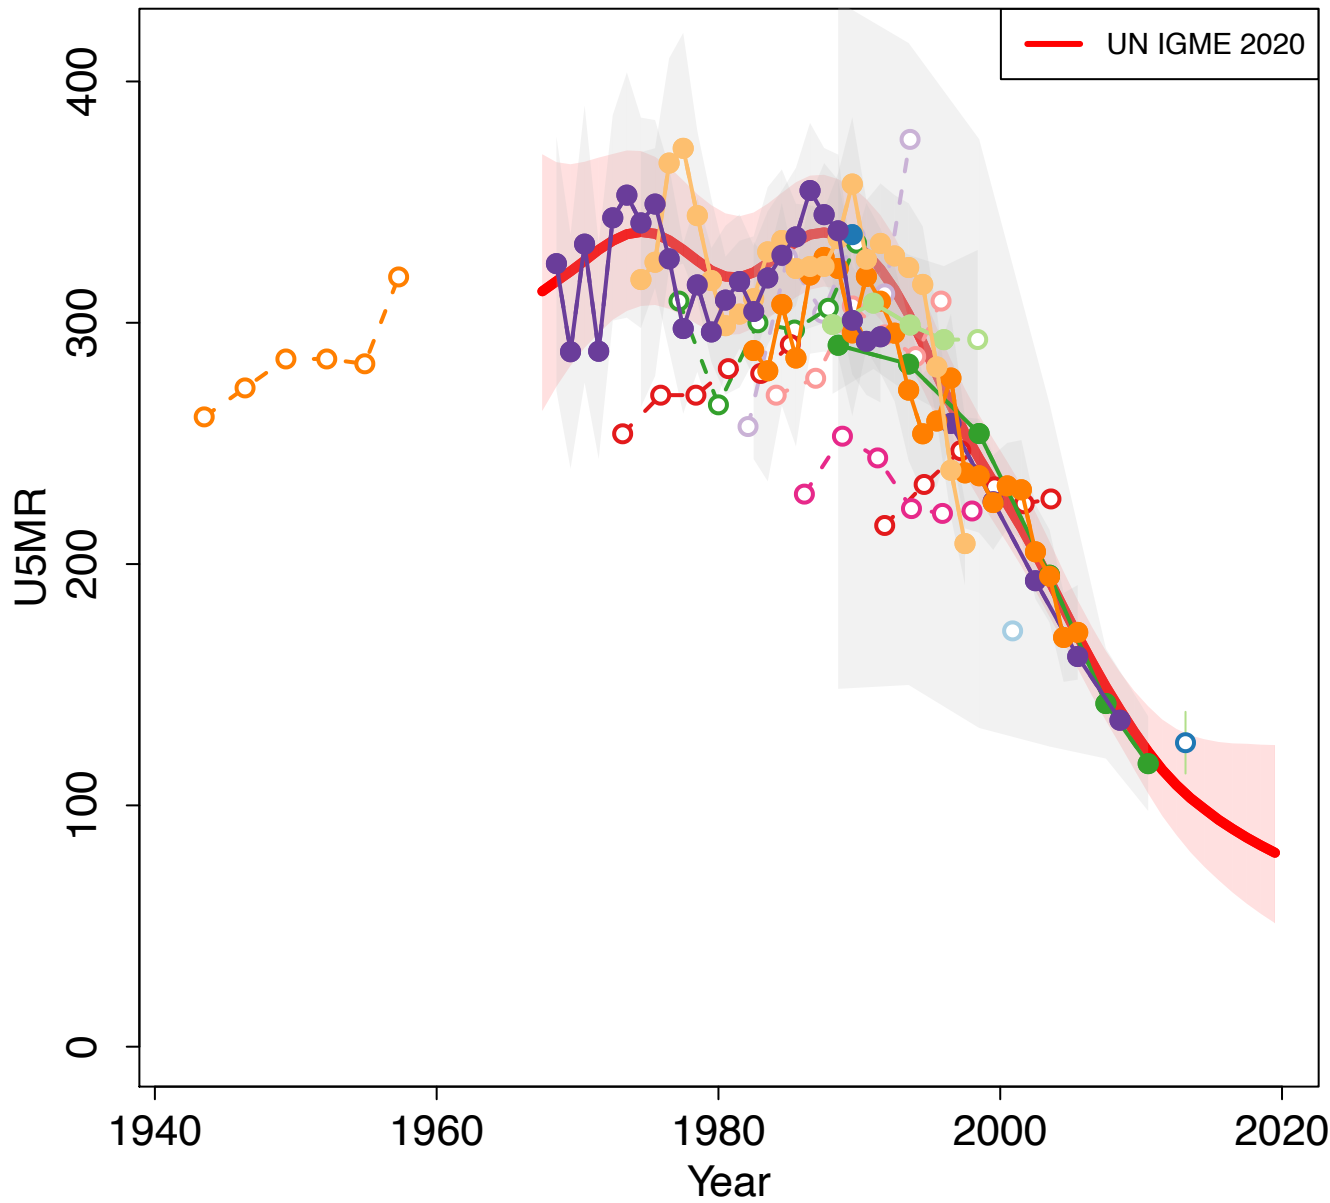

### Zoomed in

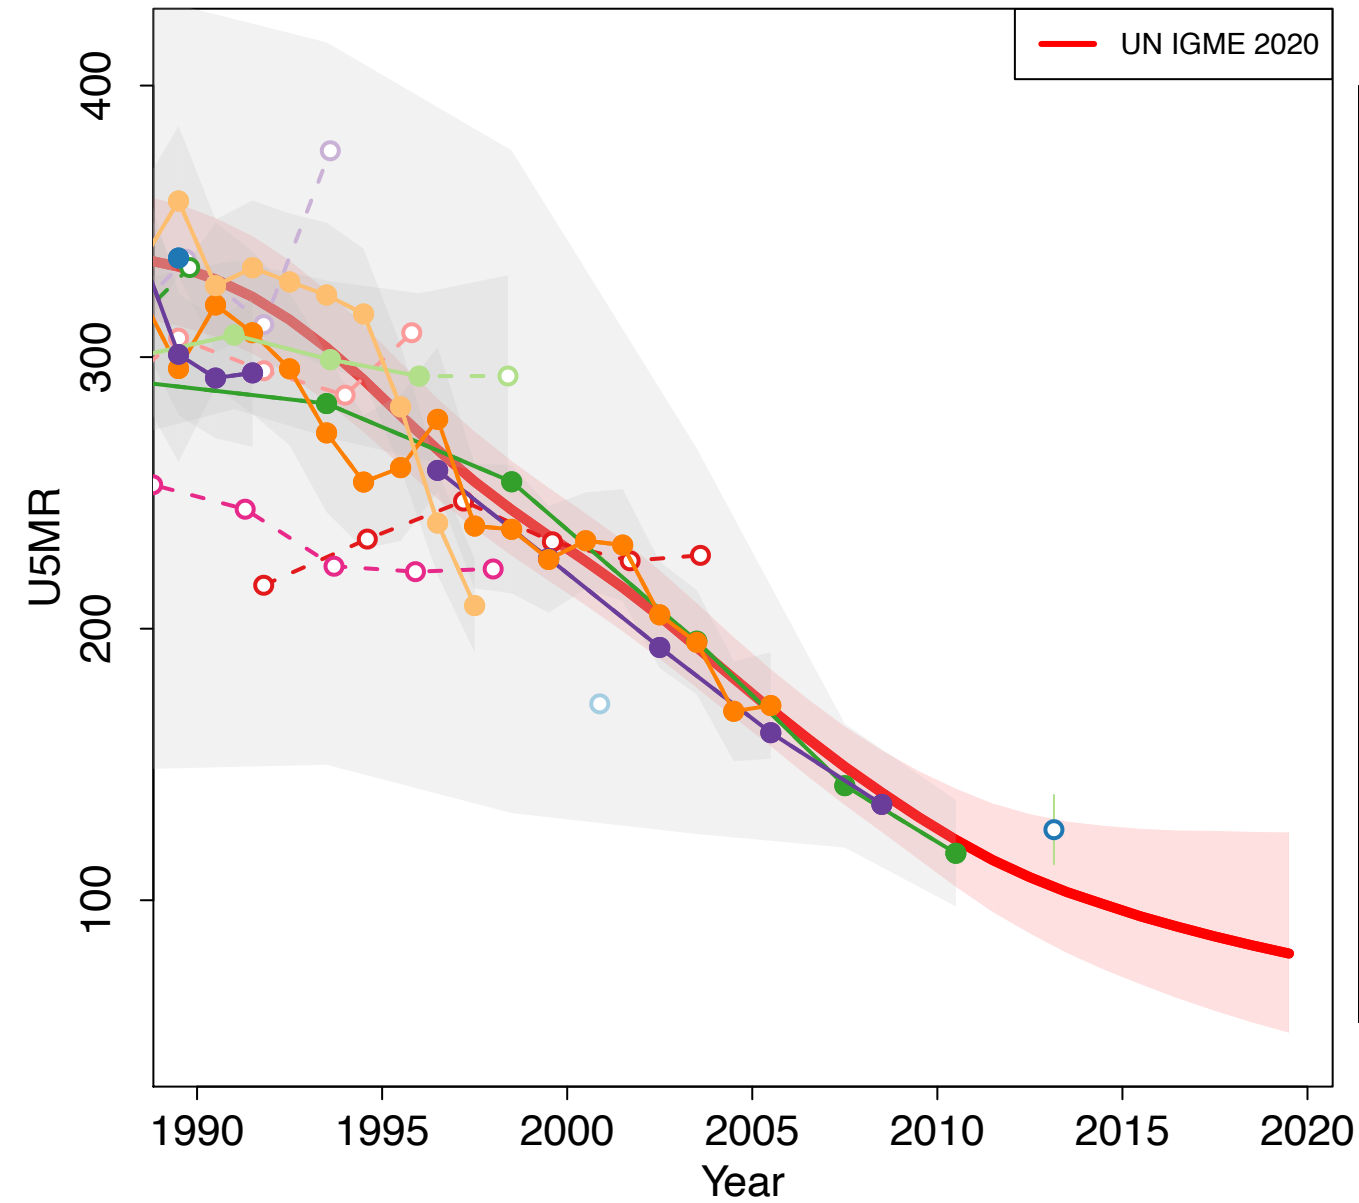

- Survey 1960 (Others Indirect)
- Census 1988 (Census Indirect)
- Demographic and Health Survey 1992 (DHS Direct)
- Demographic and Health Survey 1992 (DHS Indirect)
- Multiple Indicator Cluster Survey 1996 (MICS Direct)
- Multiple Indicator Cluster Survey 1996 (Others Indirect)
- Demographic and Health Survey 1998 (DHS Direct)
- Demographic and Health Survey 1998 (DHS Indirect)
- Multiple Indicator Cluster Survey 2000 (MICS Indirect)
- Census 2001 (Others Household Deaths)
- Census 2001 (Census Indirect)
- Demographic and Health Survey 2006 (DHS Direct)
- Demographic and Health Survey 2006 (DHS Indirect)
- Child Survival and Mortality Survey New 2010 (Others Direct)
- Demographic and Health Survey 2012 (DHS Direct)
- Etude Nationale d'Evaluation des Indicateurs Socioeconomiques et Demographiques (Preliminary 2015) (Others Direct)



# Nigeria

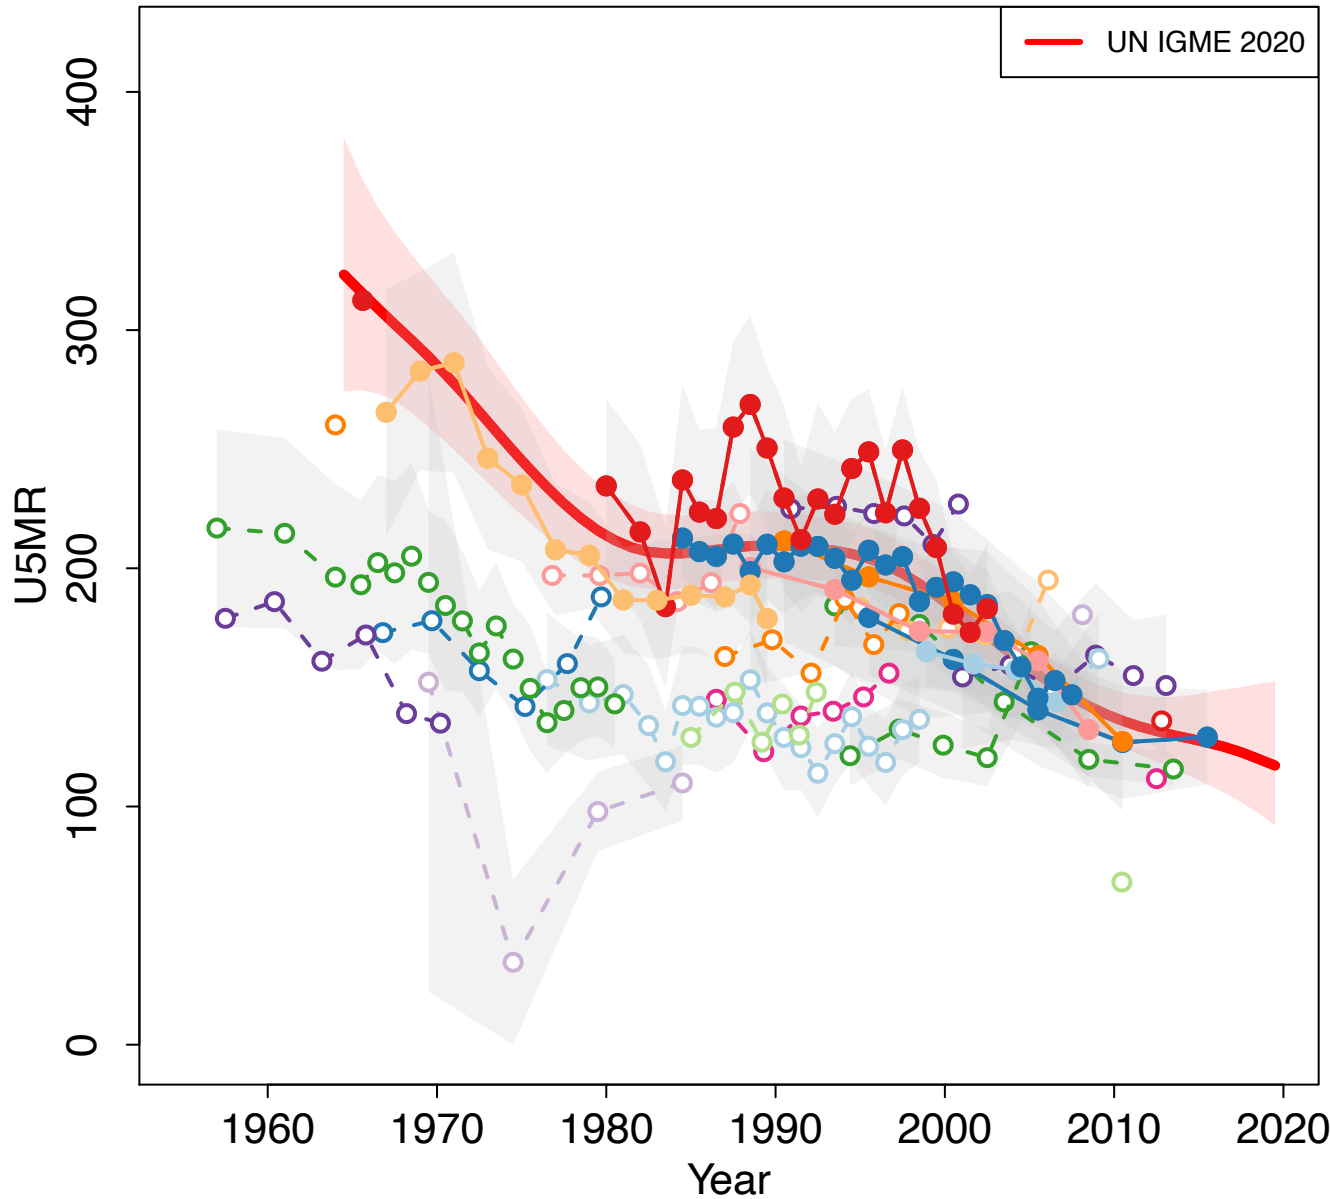

# Zoomed in

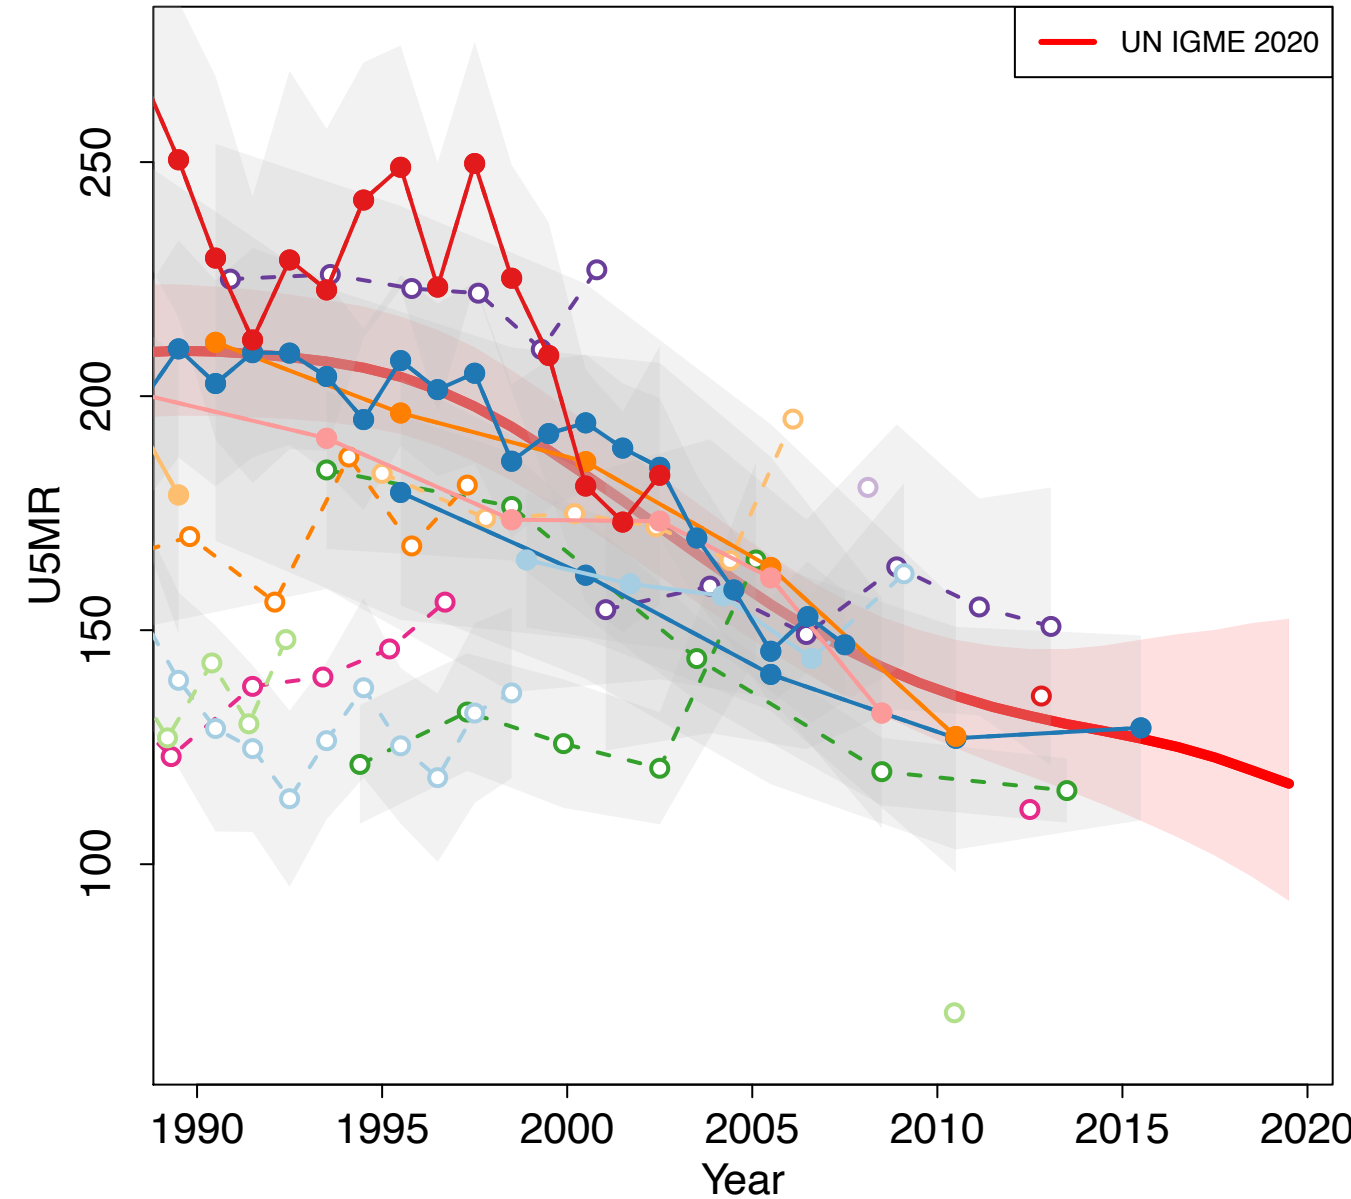

- Malumfashi DSS 1962–1977 (Others Household Deaths)
- Rural Demographic Sample Survey 1965–1966 (Others Household Deaths)
- Survey 1971–1973 (Others Indirect)
- World Fertility Survey 1981–1982 (Other DHS Direct)
- World Fertility Survey 1981–1982 (Other DHS Indirect)
- Demographic and Health Survey 1986 (Other DHS Direct)
- Demographic and Health Survey 1990 (DHS Direct)
- Demographic and Health Survey 1990 (DHS Indirect)
- Multiple Indicator Cluster Survey 1995 (Others Indirect)
- Demographic and Health Survey 1999 (Other DHS Direct)
- Demographic and Health Survey 1999 (Other DHS Indirect)
- Multiple Indicator Cluster Survey 1999 (Others Indirect)
- Demographic and Health Survey 2003 (DHS Direct)
- Demographic and Health Survey 2003 (DHS Indirect)
- Multiple Indicator Cluster Survey 2007 (MICS Indirect)
- Demographic and Health Survey 2008 (DHS Direct)
- Demographic and Health Survey 2008 (Others Household Deaths)
- Demographic and Health Survey 2008 (DHS Indirect)
- Malaria Indicator Survey 2010 (Other DHS Direct)
- GHS Panel Survey 2010 (Others Household Deaths)
- Multiple Indicator Cluster Survey 2011 (MICS Indirect)
- GHS Panel Survey 2012–2013 (Others Household Deaths)
- Demographic and Health Survey 2013 (DHS Direct)
- Demographic and Health Survey 2013 (Others Household Deaths)
- Malaria Indicator Survey 2015 (Other DHS Indirect)
- Multiple Indicator Cluster Survey 2016–2017 (MICS Direct)
- Demographic and Health Survey (Preliminary) 2018 (DHS Direct)

### Niue

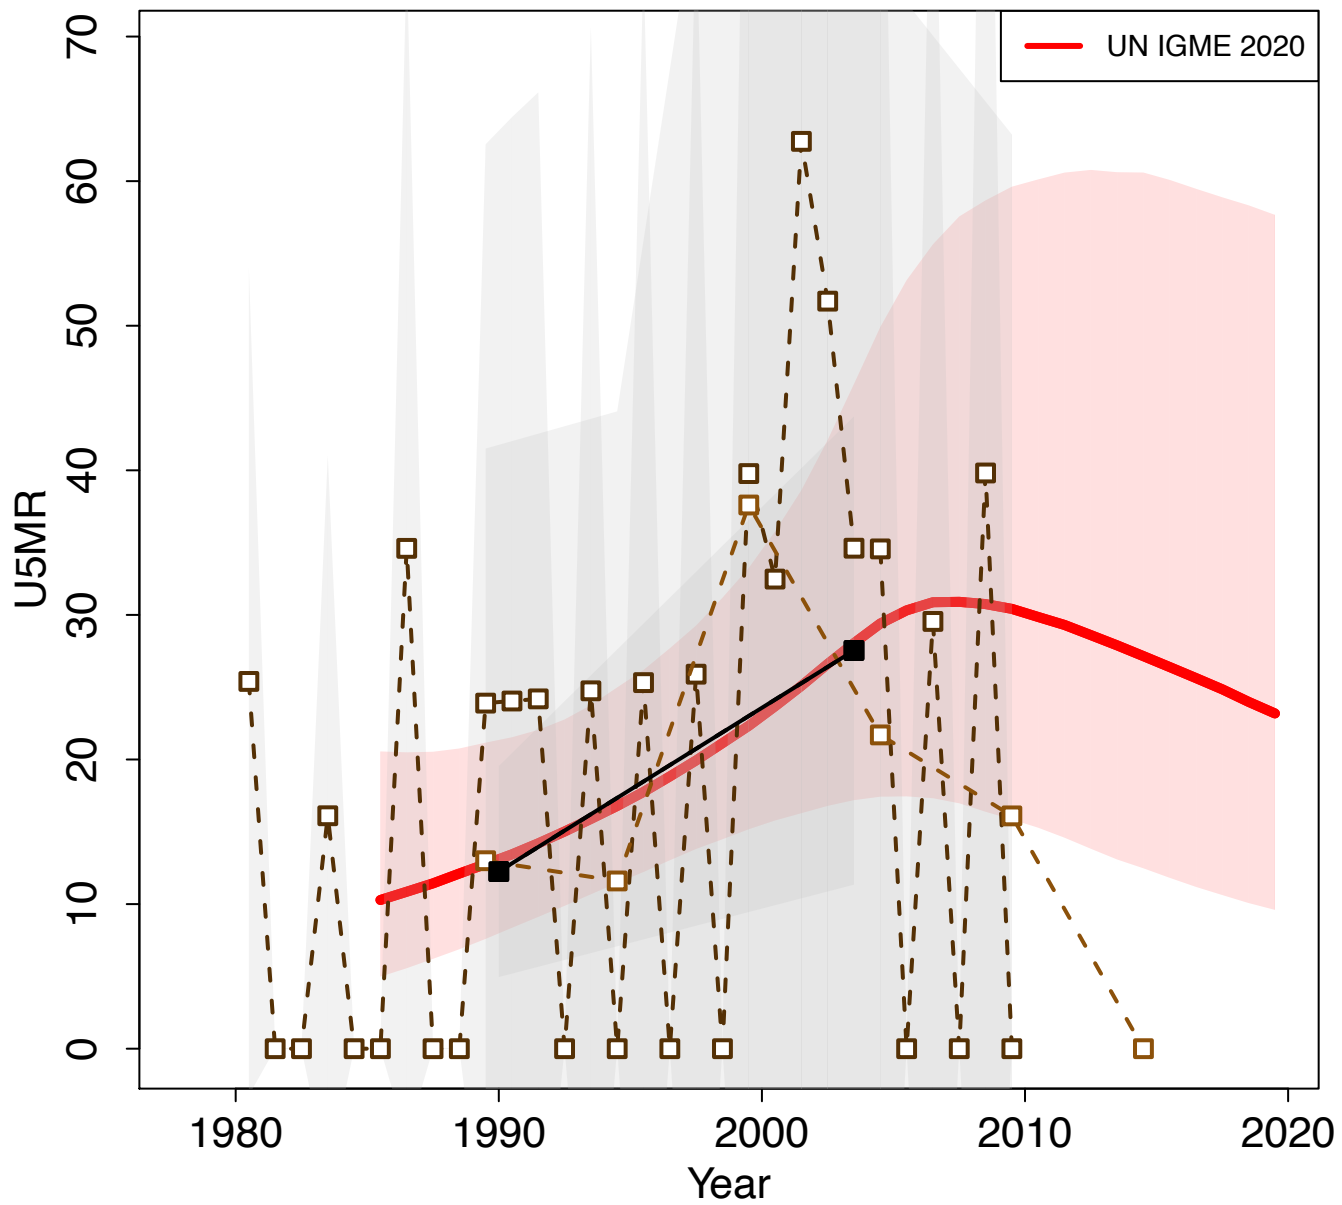

### Zoomed in

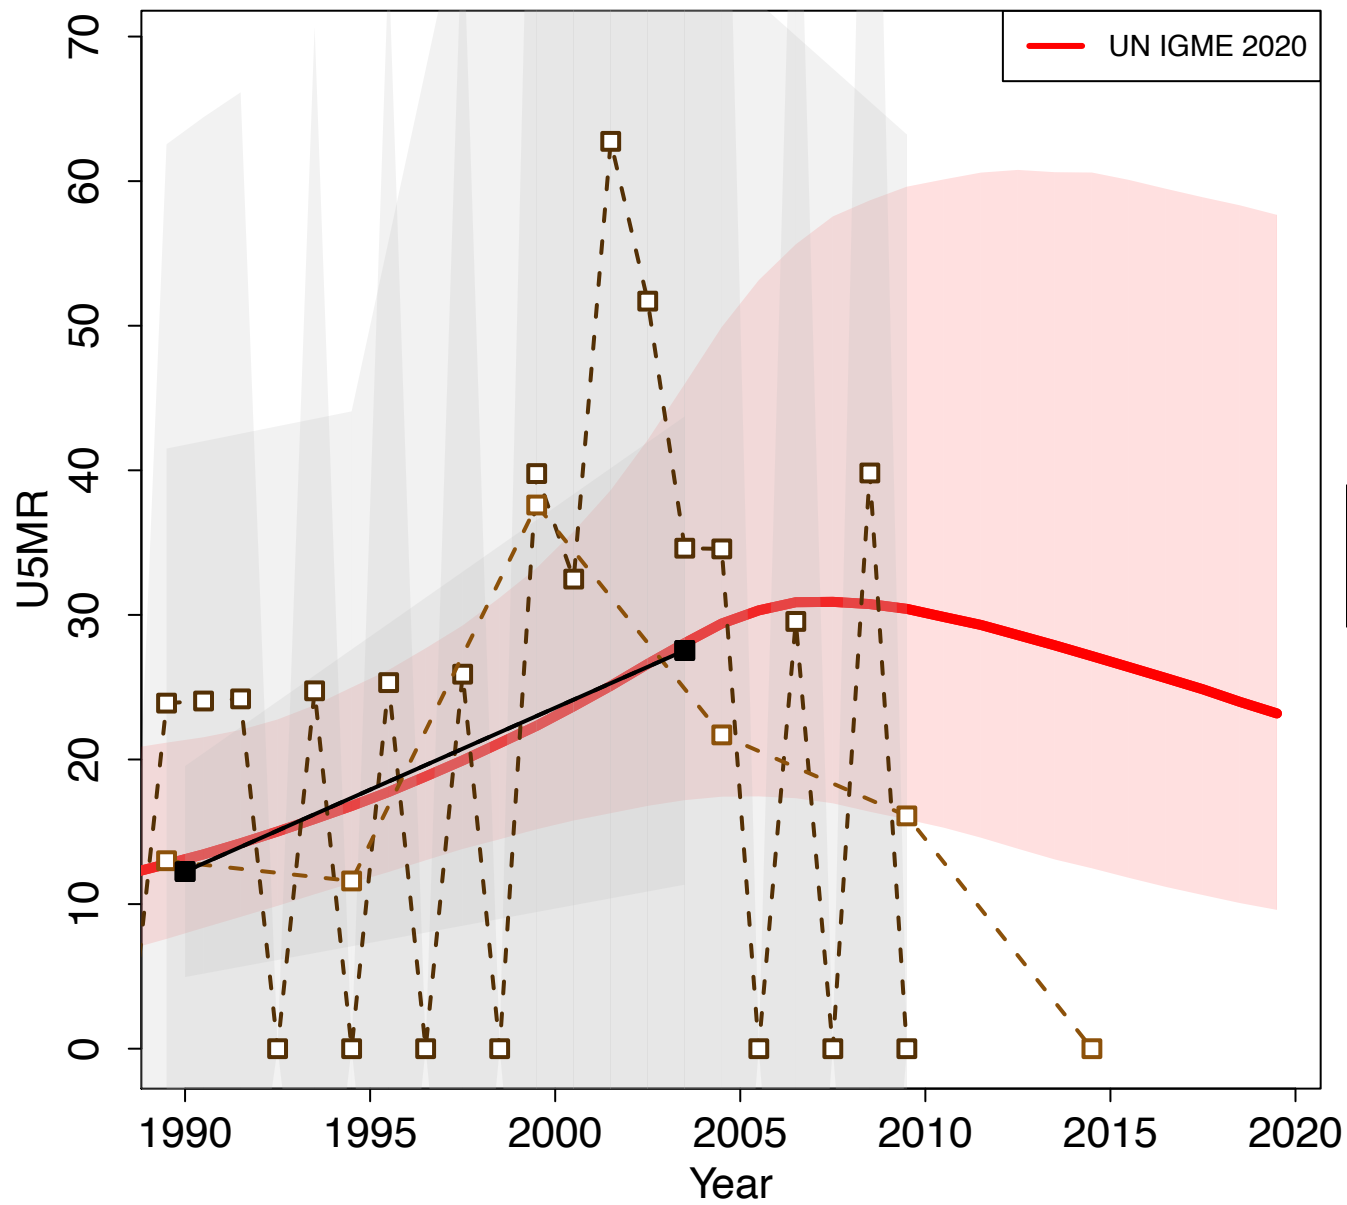

Norway

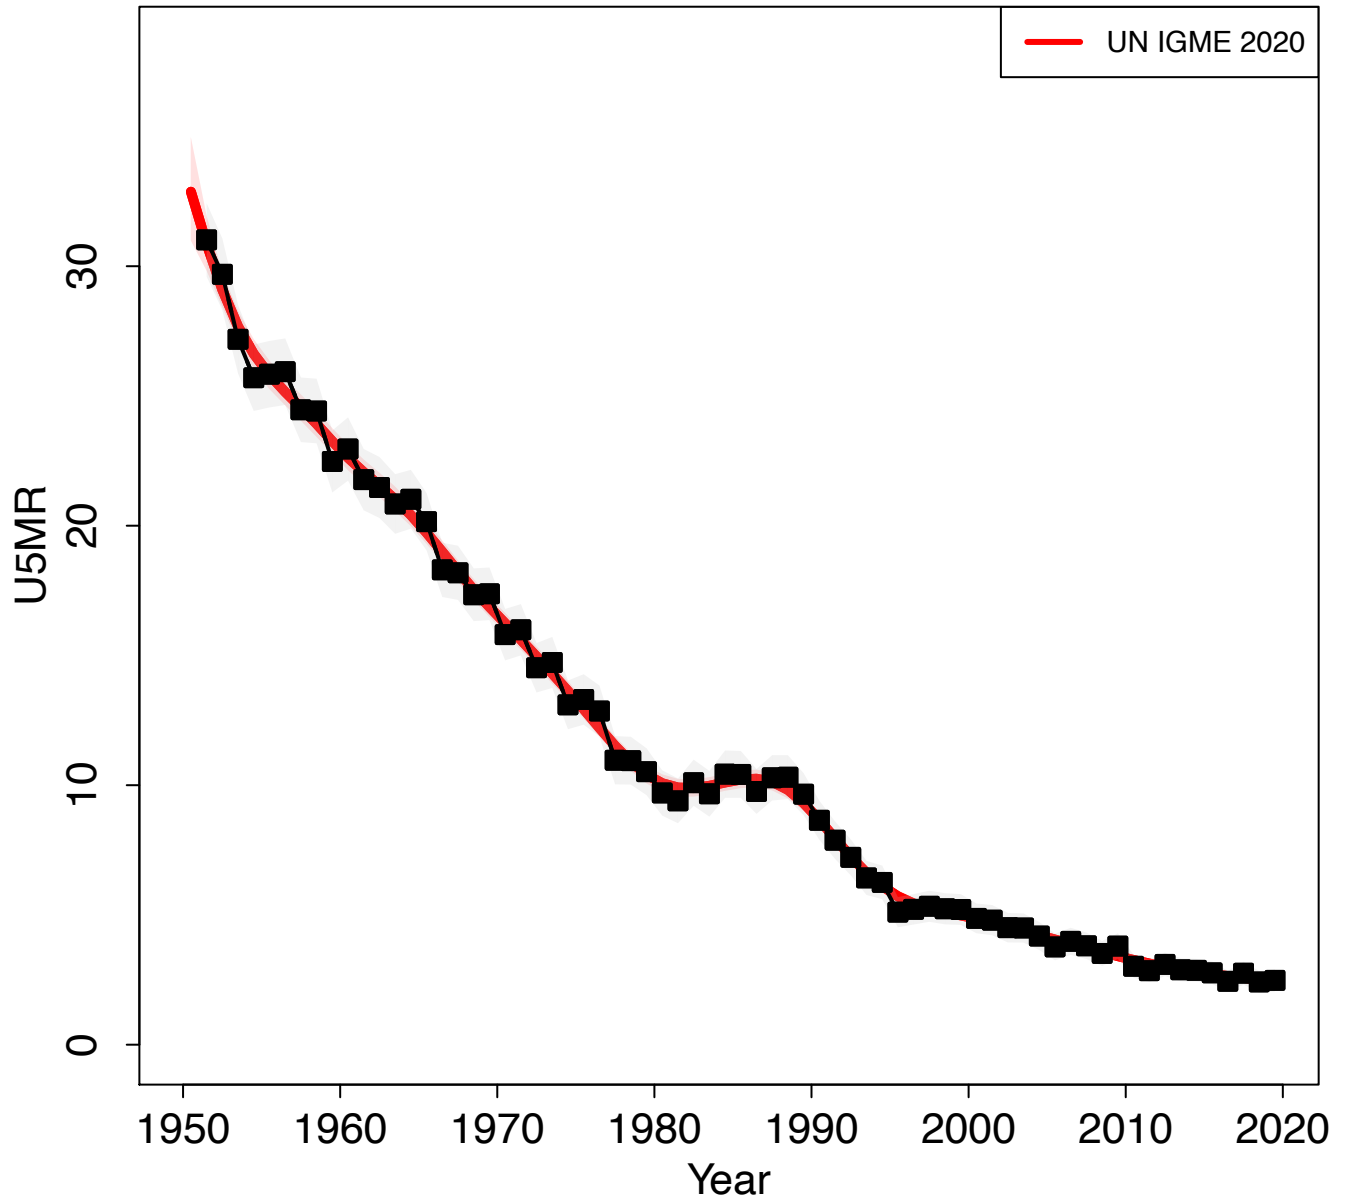

Zoomed in

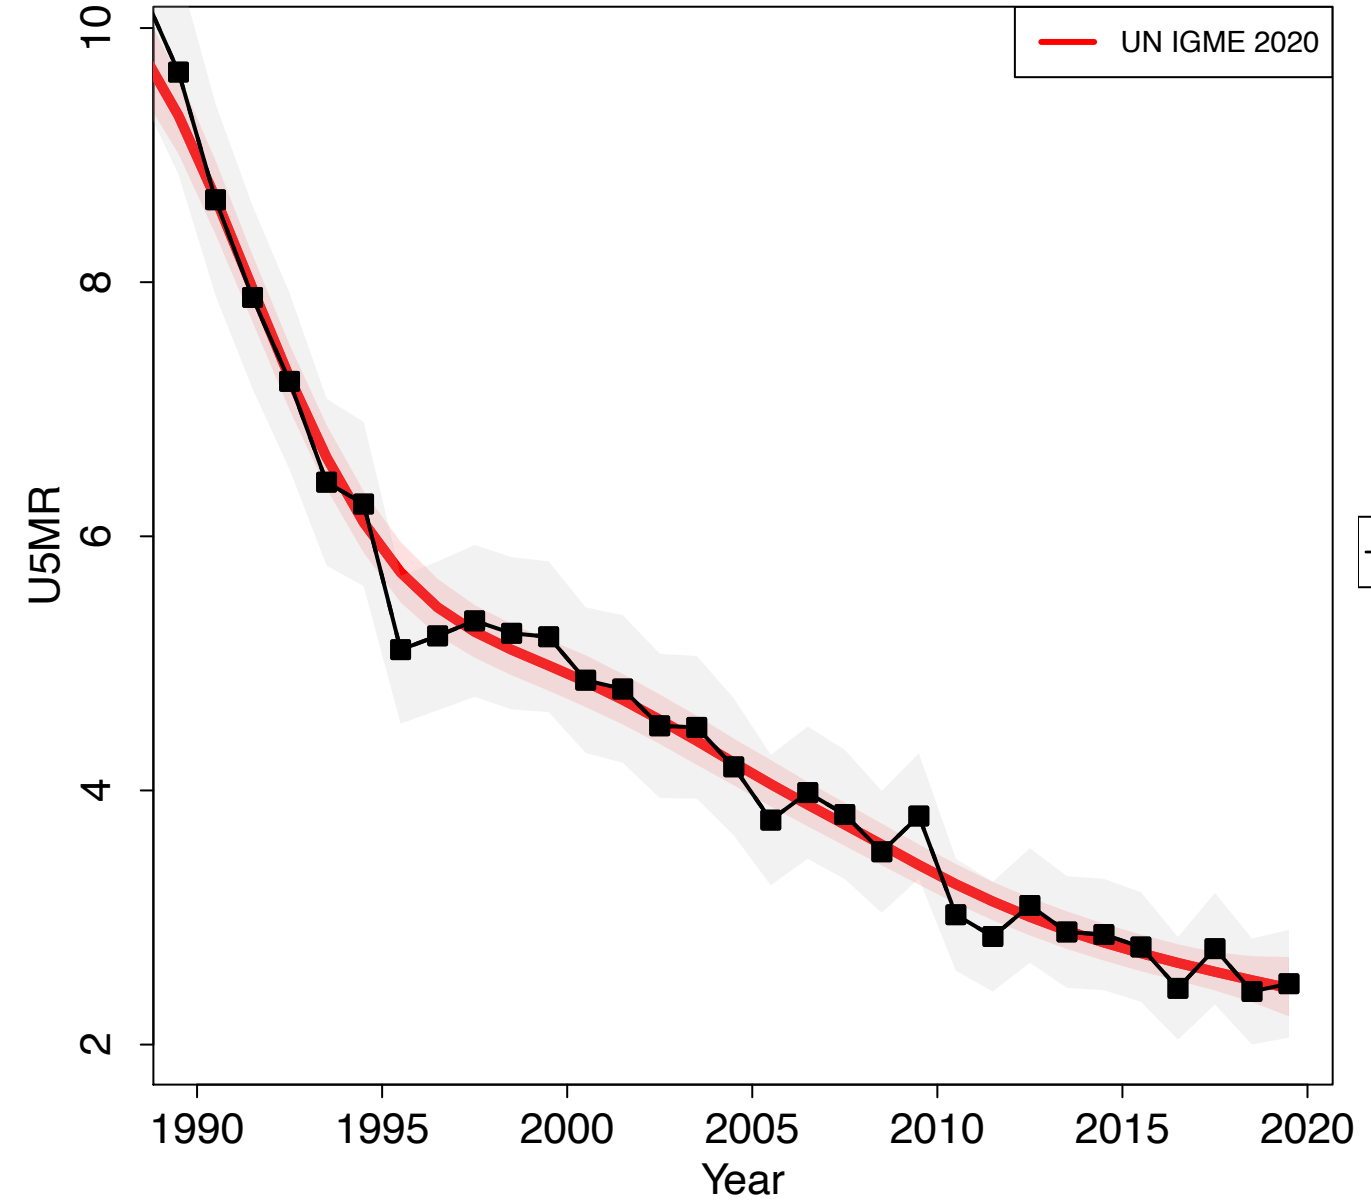

# Oman

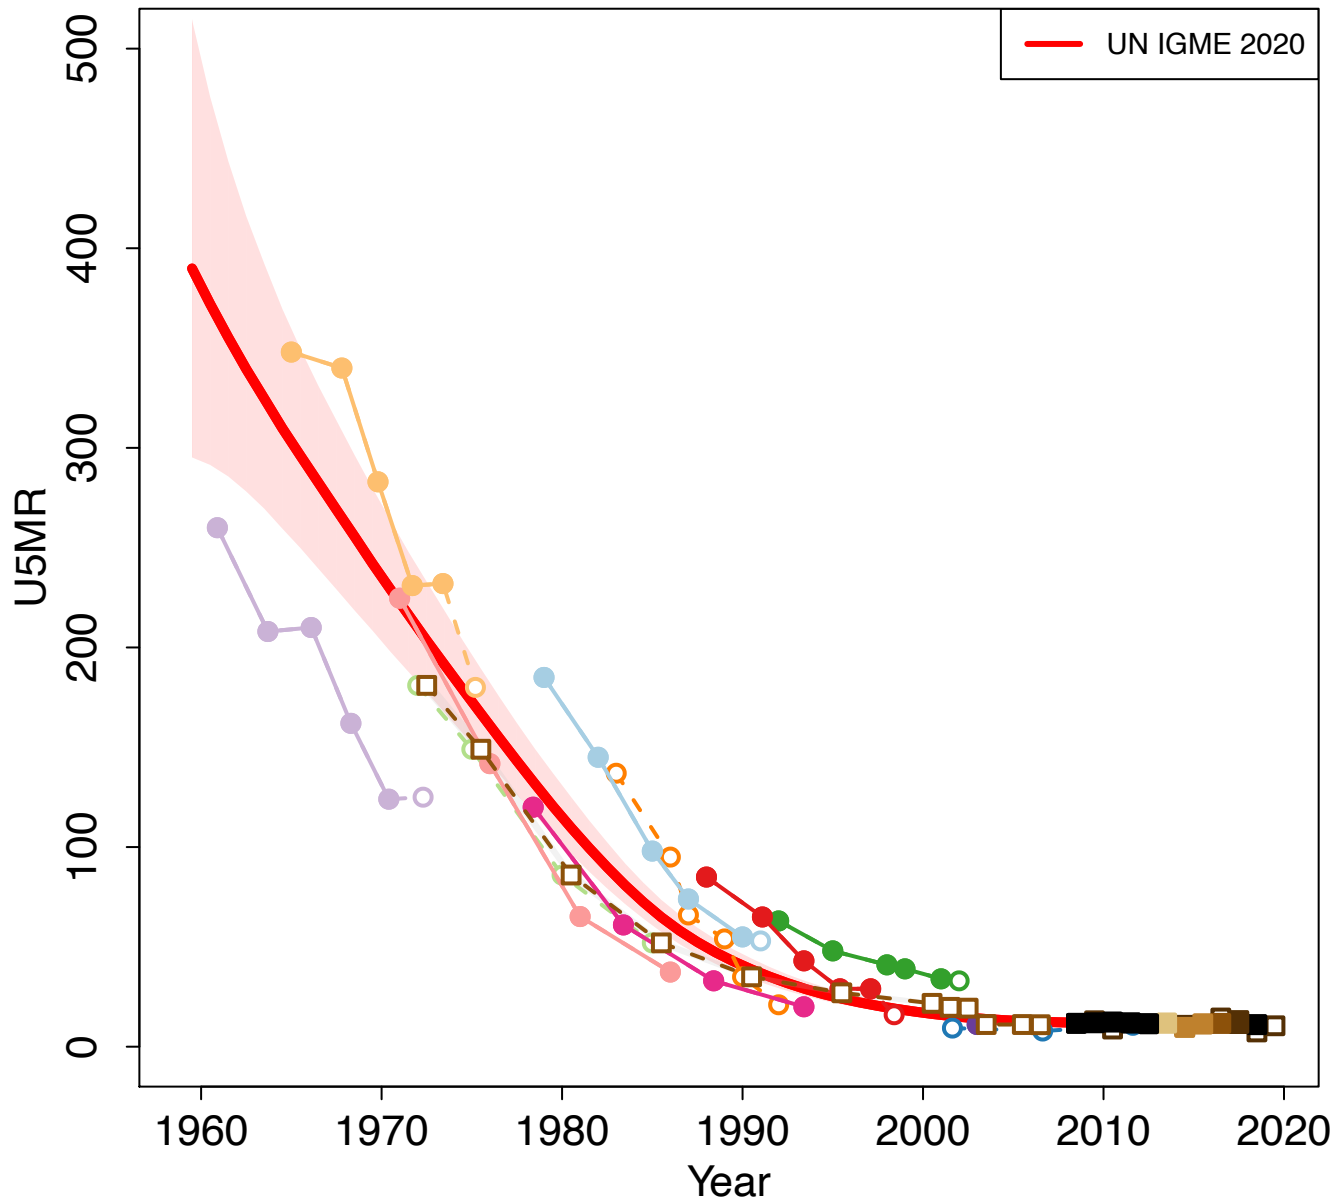

# Zoomed in

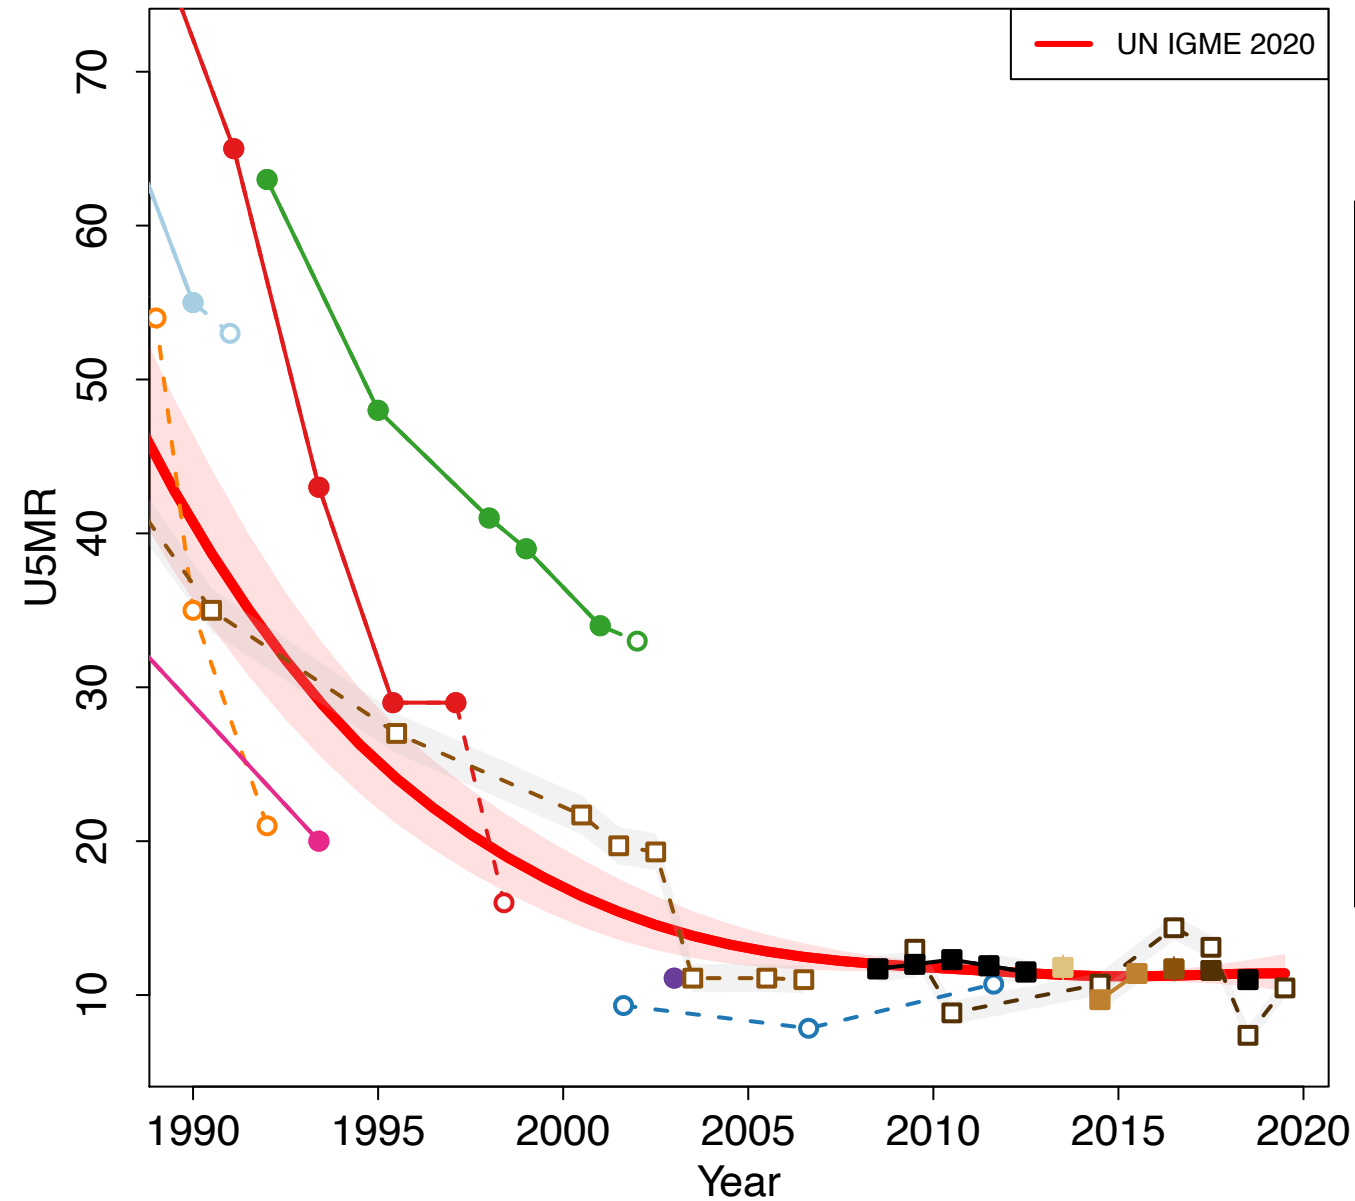

- Socio-Demographic Survey in 5 towns 1975 (Others Indirect)
- Socio-Demographic Survey 1977-1979 (Others Indirect)
- Child Health Survey 1988 (Others Direct)
- Child Health Survey 1988 (Others Indirect)
- Census 1993 (Census Indirect)
- Family Health Survey 1995 (Others Direct)
- Family Health Survey 1995 (Others Indirect)
- Comprehensive Health Survey for Evaluation and Reproductive Health 2000 (Others Indirect)
- Census 2003 (Others Household Deaths)
- Census 2003 (Census Indirect)
- Multiple Indicator Cluster Survey 2014 (MICS Direct)
- VR Data from Ministry of Health Annual Health Report
- VR WHO
- VR Data from Ministry of Health Annual Health Report
- VR Data from Ministry of Health Annual Health Report
- VR Data from Ministry of Health Annual Health Report
- VR Data from Ministry of Health Annual Health Report
- VR Data from Ministry of Health Annual Health Report

# Pakistan

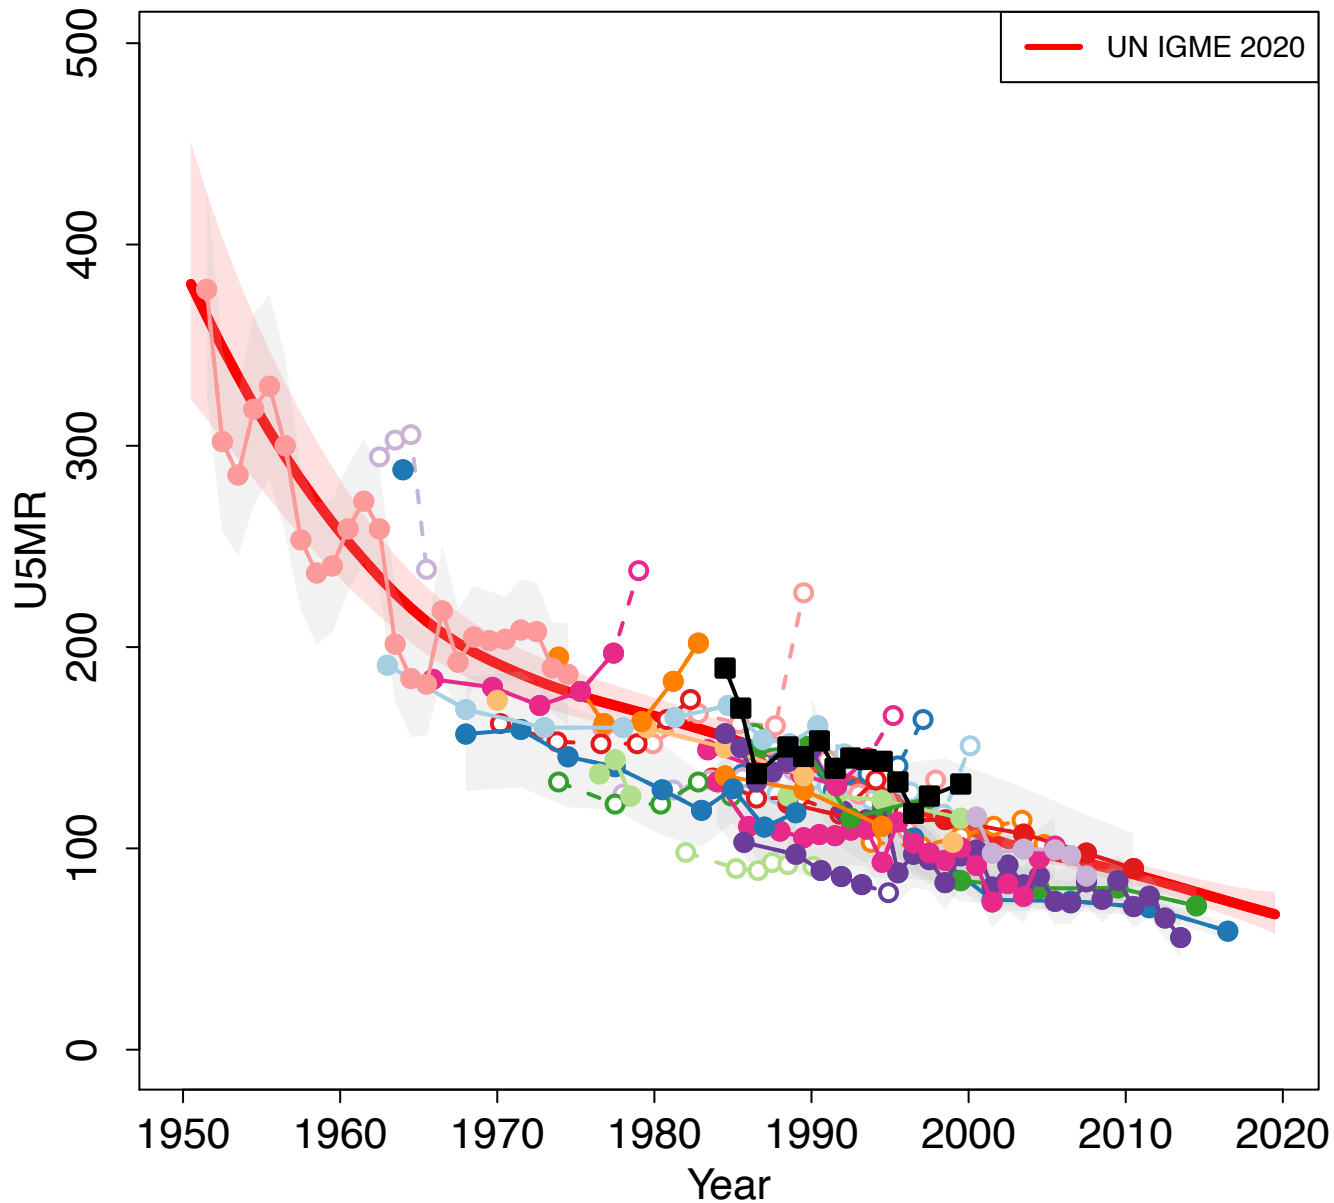

# Zoomed in

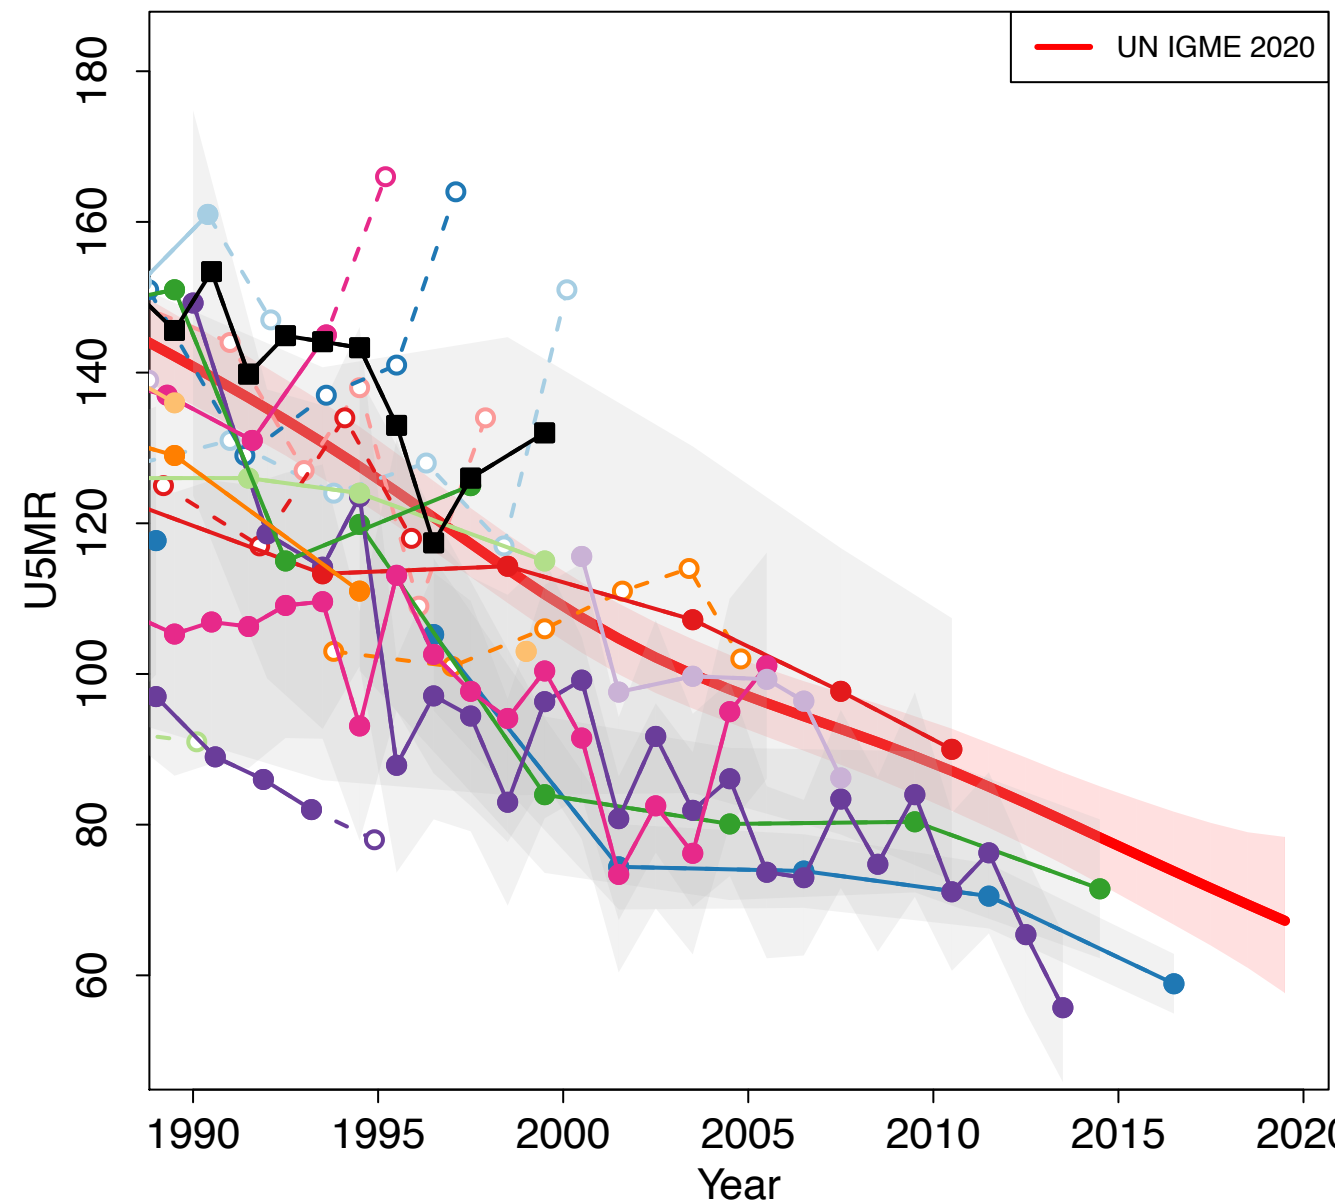

- Population Growth Estimation Experiment 1962–1965 (Others Direct)
- Population Growth Estimation Experiment 1962–1965 (Others Household Deaths)
- Population Growth Survey I 1971 (Others Direct)
- World Fertility Survey 1975 (Other DHS Direct)
- Population Growth Survey II 1976–1978 (Others Direct)
- Labour Force and Migration Survey 1980 (Others Direct)
- Census 1981 (Census Indirect)
- Contraceptive Prevalence Survey 1984 (Others Indirect)
- Demographic Survey 1984 (Others Indirect)
- Demographic Survey 1988 (Others Direct)
- Demographic Survey 1988 (Others Indirect)
- Demographic and Health Survey 1990–1991 (DHS Direct)
- Demographic and Health Survey 1990–1991 (DHS Indirect)
- Living Standards Survey 1991 (Others Direct)
- Living Standards Survey 1991 (Others Indirect)
- Contraceptive Prevalence Survey 1993 (Others Indirect)
- Contraceptive Prevalence Survey 1994–1995 (Others Indirect)
- Integrated Household Survey 1996 (Others Indirect)
- Pakistan Fertility and Family Planning Survey 1996 (Others Direct)
- Pakistan Fertility and Family Planning Survey 1996 (Others Indirect)
- Census 1998 (Census Indirect)
- Integrated Household Survey 1998 (Others Direct)
- Integrated Household Survey 1998 (Others Indirect)
- Pakistan Demographic Survey 2000–2007 (Others Household Deaths)
- Reproductive Health and Family Planning Survey 2000–2001 (Others Direct)
- Reproductive Health and Family Planning Survey 2000–2001 (Others Indirect)
- Integrated Household Survey 2001 (Others Direct)
- Integrated Household Survey 2001 (Others Indirect)
- Demographic and Health Survey 2006–2007 (DHS Direct)
- Demographic and Health Survey 2006–2007 (DHS Indirect)
- Demographic and Health Survey 2012–2013 (DHS Direct)
- Social & Living Standards Measurement Survey 2013–2014 (Others Direct)
- Demographic and Health Survey 2017–2018 (DHS Direct)
- Social & Living Standards Measurement Survey 2018–2019 (Others Direct)
- SVR Pakistan Demographic Survey

### Palau

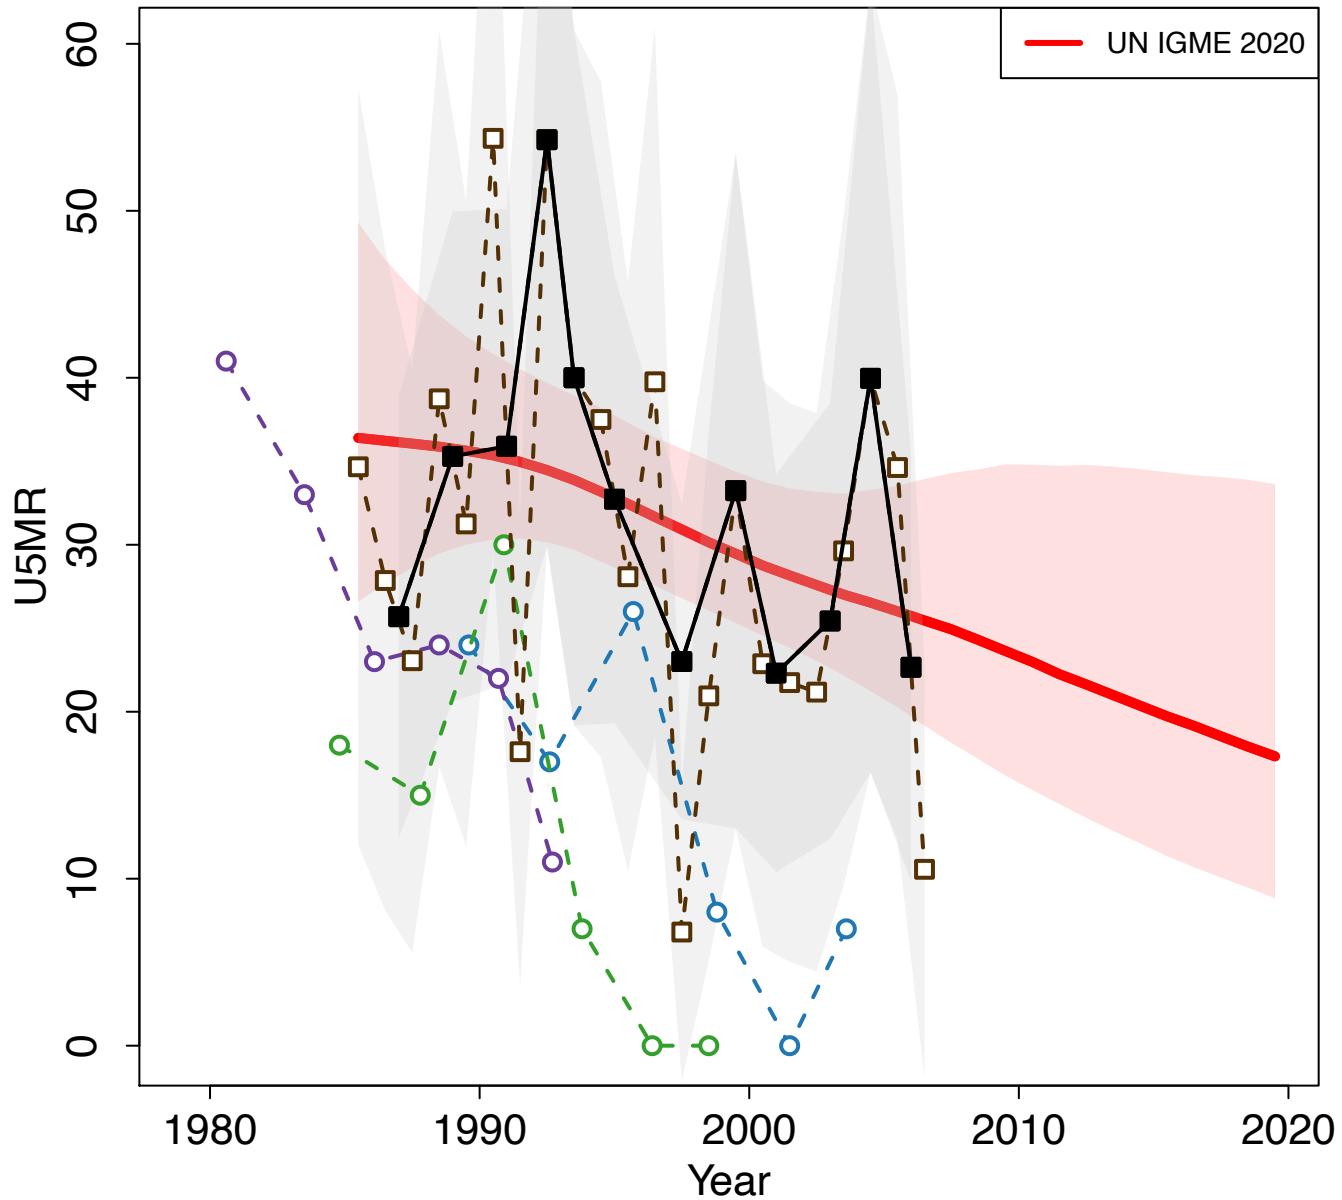

### Zoomed in

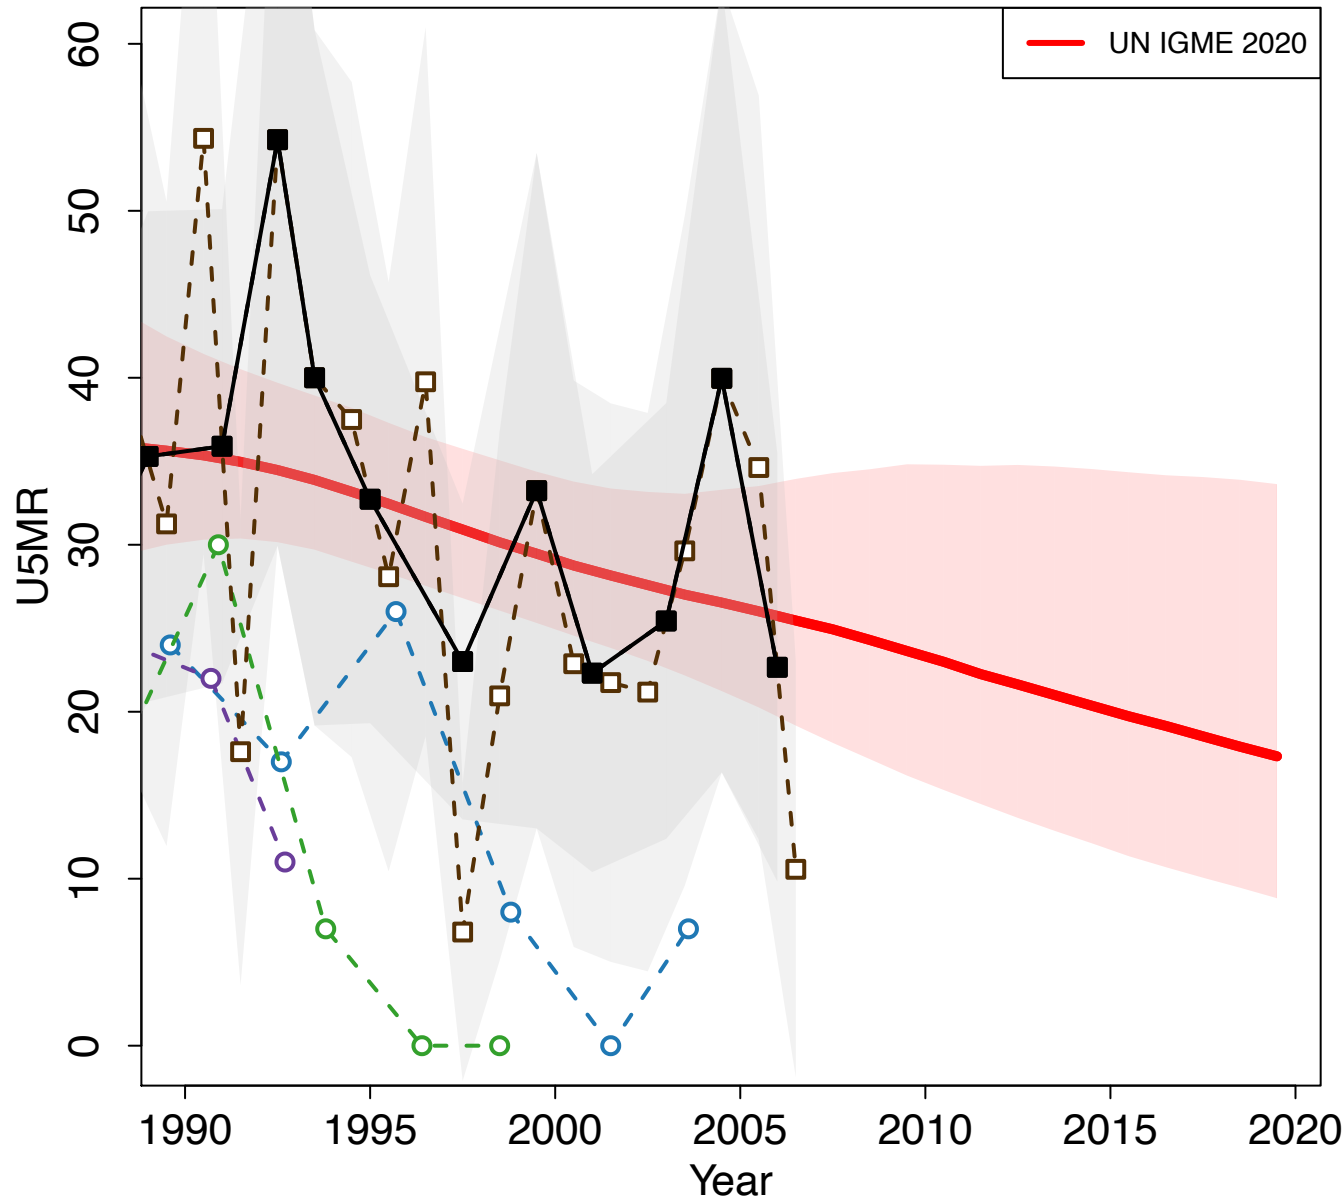

- Census 1995 (Census Indirect)
- Census 2000 (Census Indirect)
- Census 2005 (Census Indirect)
- VR WHO
- VR WHO (Recalculated)

### Panama

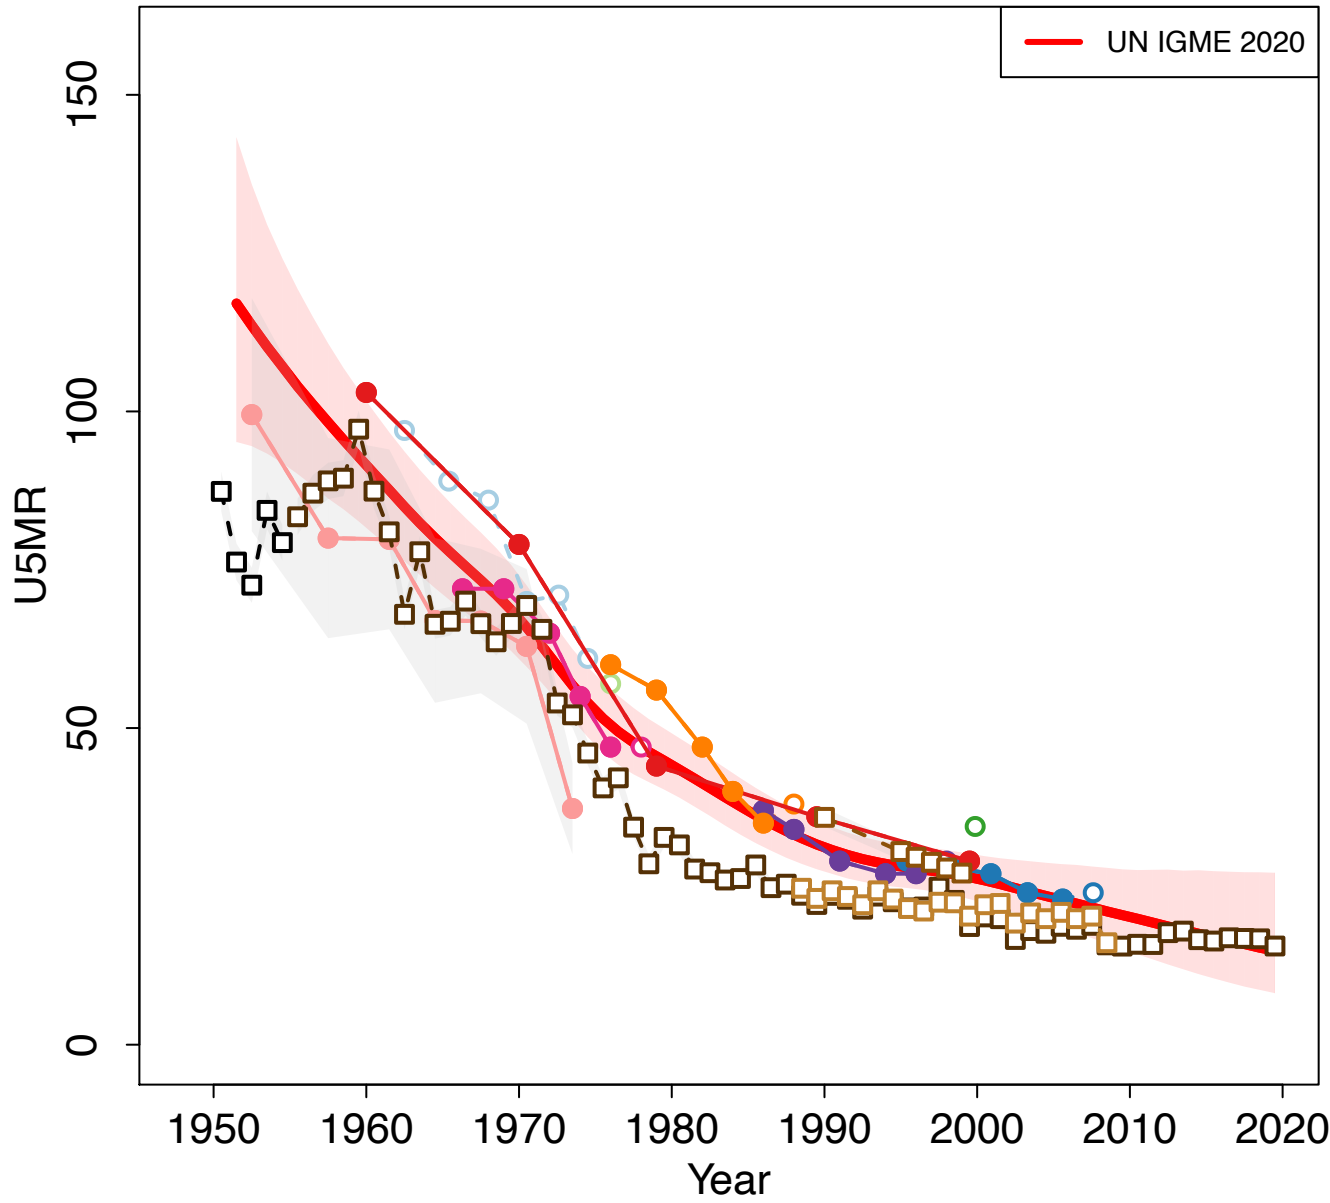

### Zoomed in

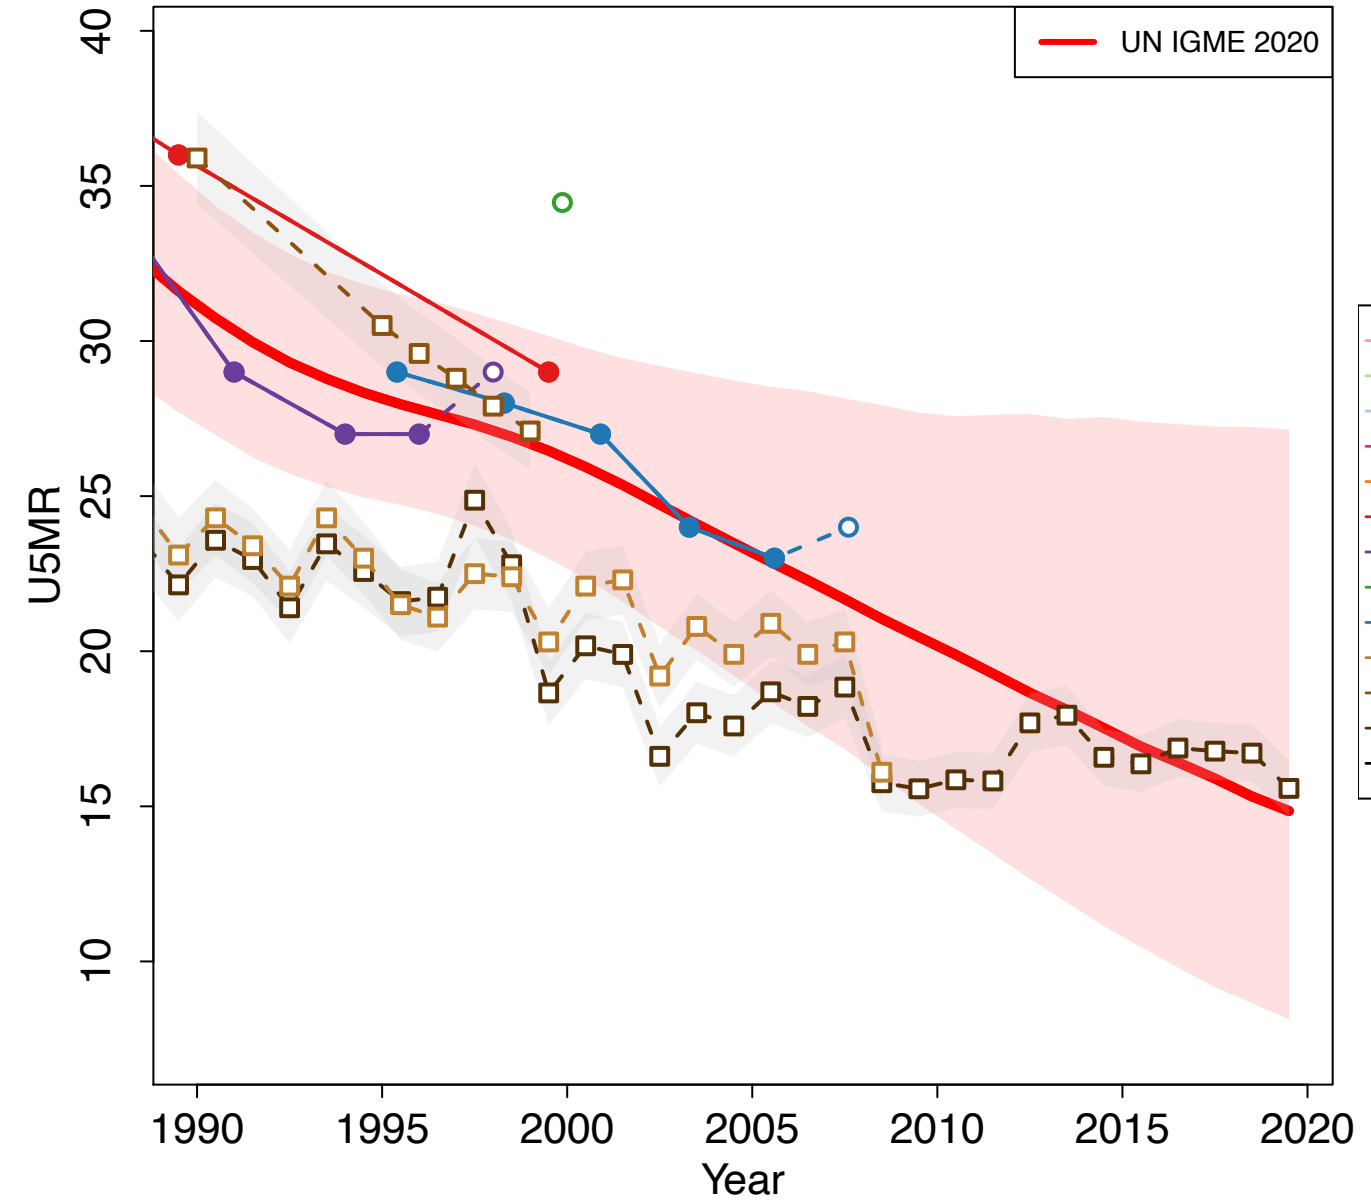

- World Fertility Survey 1975–1976 (Other DHS Direct)
- Encuesta Demografica Nacional 1975–1977 (Others Direct)
- Encuesta Demografica Nacional 1975–1977 (Others Indirect)
- Census 1980 (Census Indirect)
- Census 1990 (Census Indirect)
- TABLAS DE VIDA NACIONALES 1999 (Others Life Table)
- Census 2000 (Census Indirect)
- Census 2000 (Others Household Deaths)
- Census 2010 (Census Indirect)
- VR Vital Registration from National Statistical Institute
- VR Vital Registration and Census
- VR WHO
- VR UNPD Demographic Yearbook Data 2020 version



### Papua New Guinea

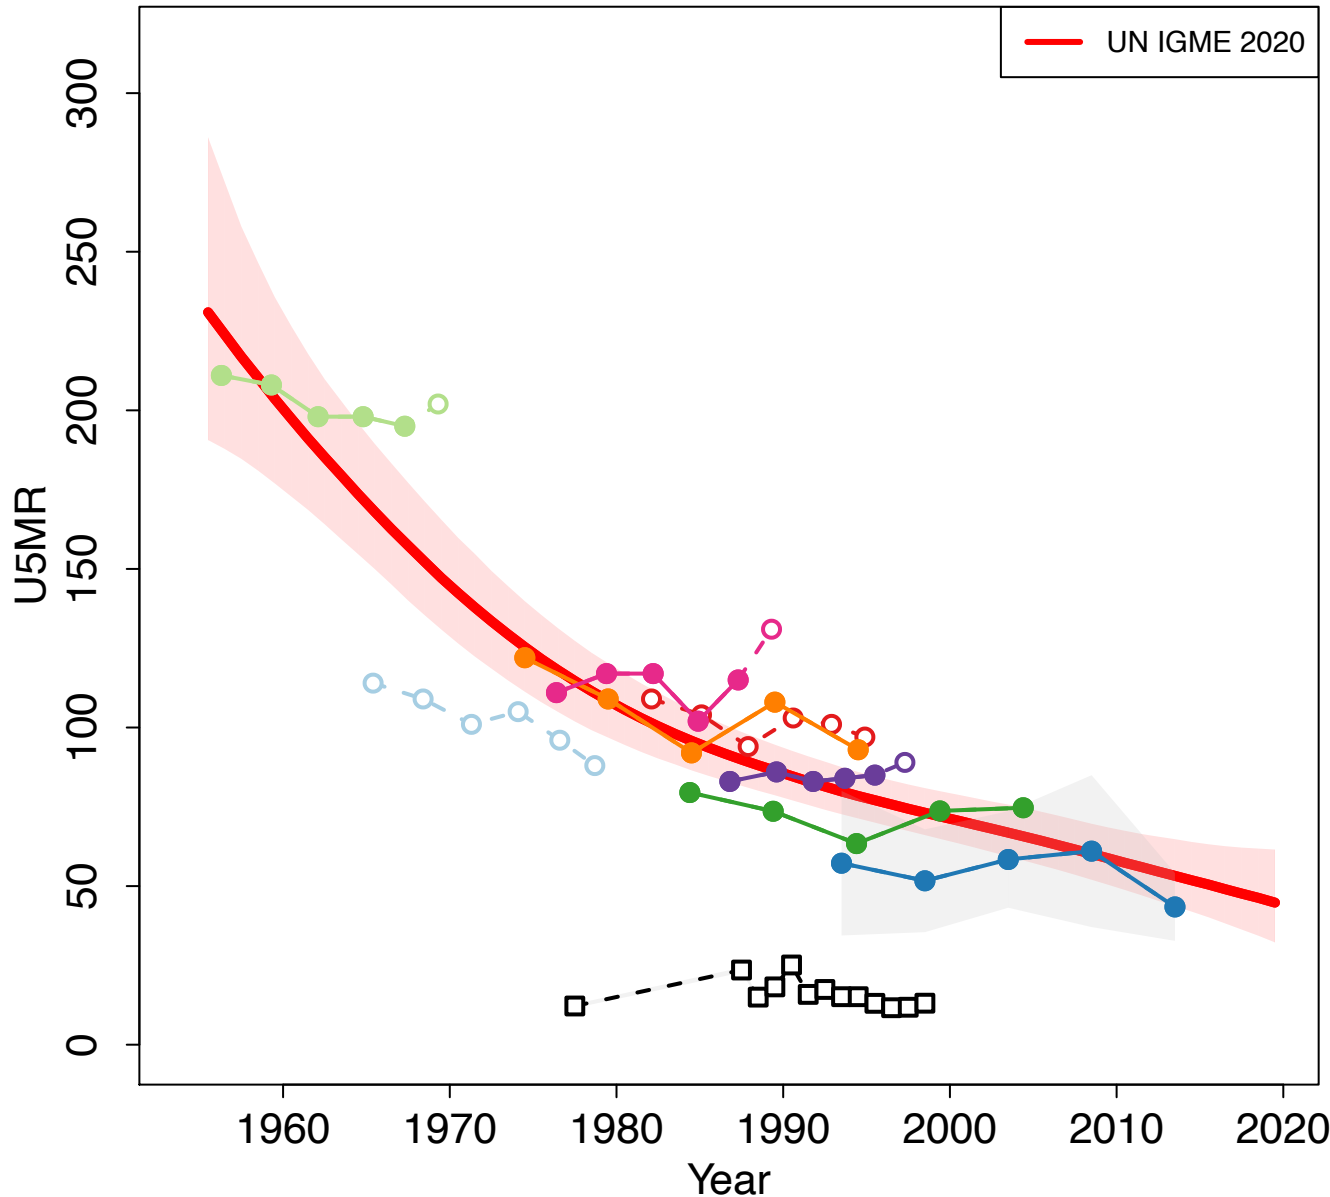

### Zoomed in

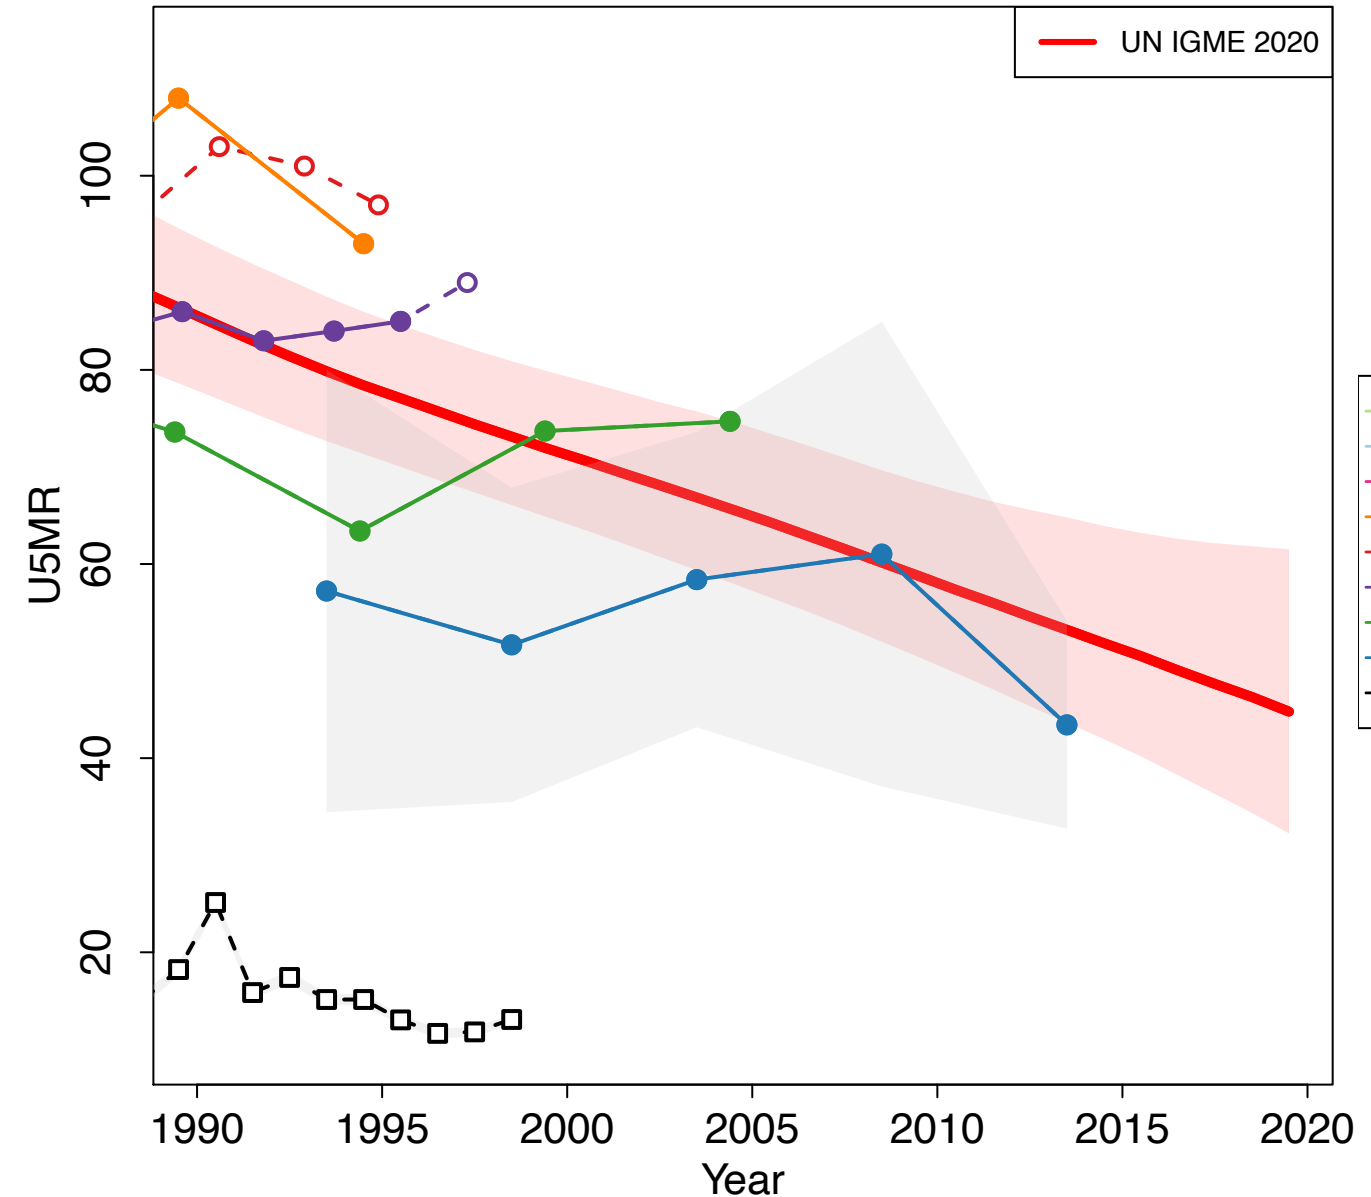

- Census 1971 (Census Indirect)
- Census 1980 (Census Indirect)
- Demographic and Health Survey 1991 (Other DHS Indirect)
- Demographic and Health Survey 1996 (Other DHS Direct)
- Demographic and Health Survey 1996 (Other DHS Indirect)
- Census 2000 (Census Indirect)
- Demographic and Health Survey 2006 (Other DHS Direct)
- Demographic and Health Survey 2016–2018 (DHS Direct)
- VR WHO



### Paraguay

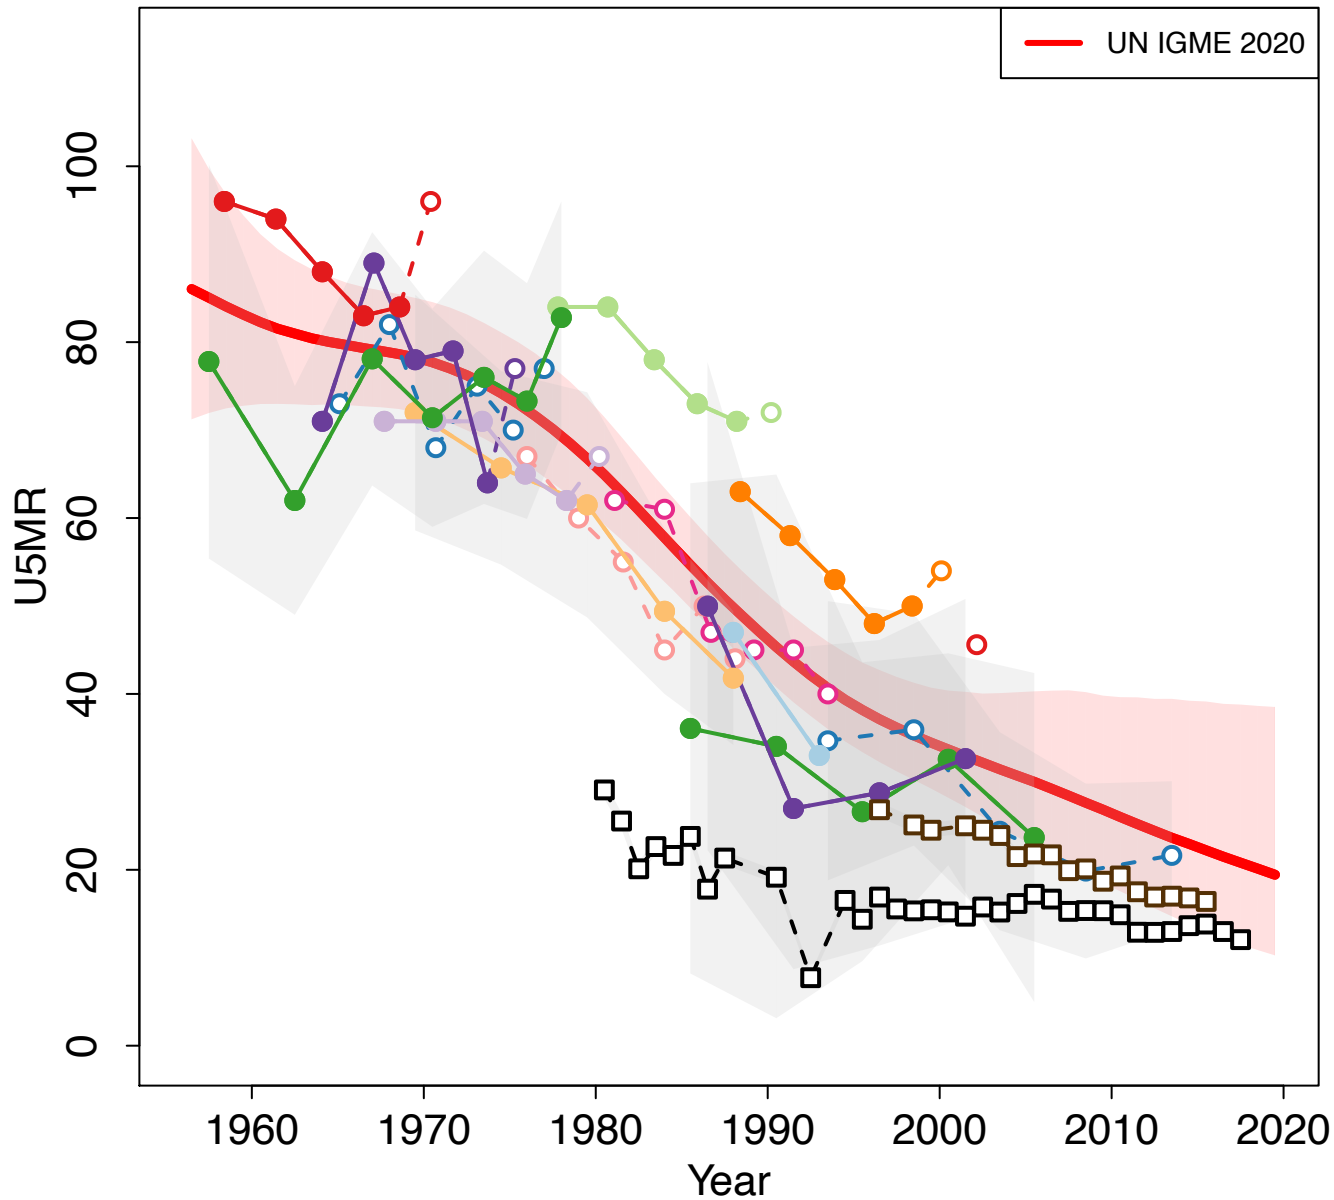

### Zoomed in

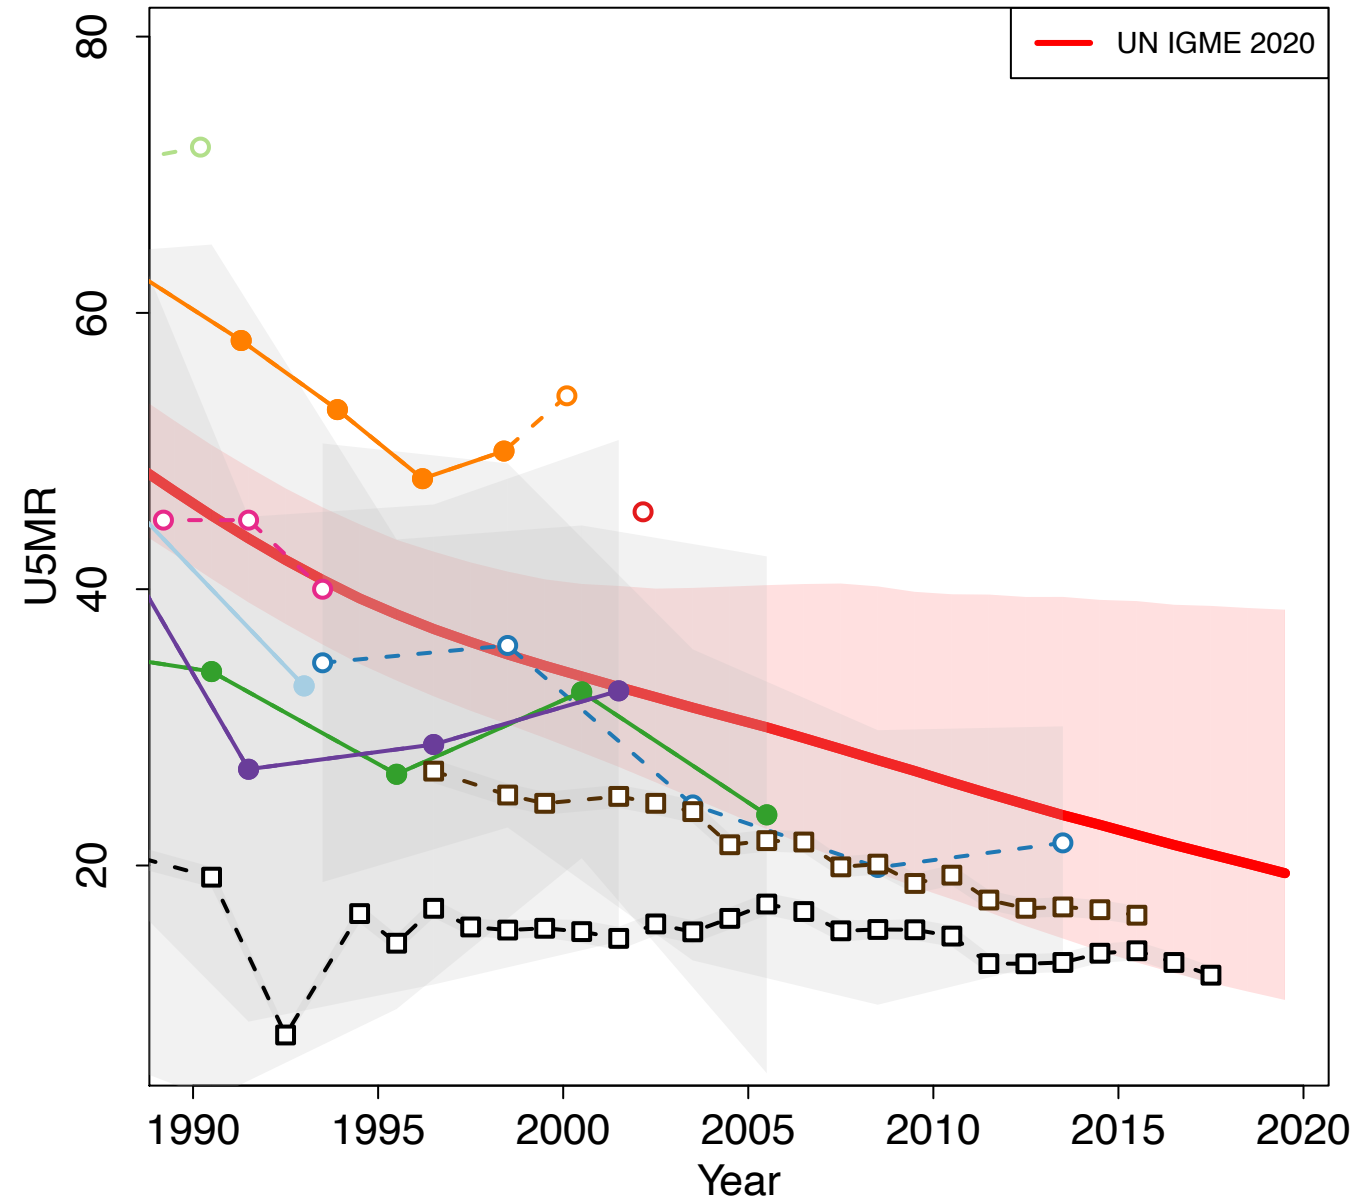

- Census 1972 (Census Indirect)
- National Survey of Contraceptive Use 1977 (Others Indirect)
- World Fertility Survey 1979 (Other DHS Direct)
- National Fertility Survey 1979 (Other DHS Indirect)
- Census 1982 (Census Indirect)
- Demographic and Health Survey 1990 (DHS Direct)
- Demographic and Health Survey 1990 (DHS Indirect)
- Census 1992 (Census Indirect)
- National Survey of Demography and Reproductive Health 1995–1996 (Others Direct)
- National Survey of Demography and Reproductive Health 1995–1996 (Others Indirect)
- Census 2002 (Census Indirect)
- Census 2002 (Others Household Deaths)
- Reproductive Health Survey 2004 (Others Direct)
- Encuesta Nacional de Demografia y Salud Sexual y Reproductiva 2008 (Others Direct)
- Multiple Indicator Cluster Survey 2016 (MICS Direct)
- VR VR Ministerio de Salud Publica y Bienestar Social
- VR WHO

# Peru

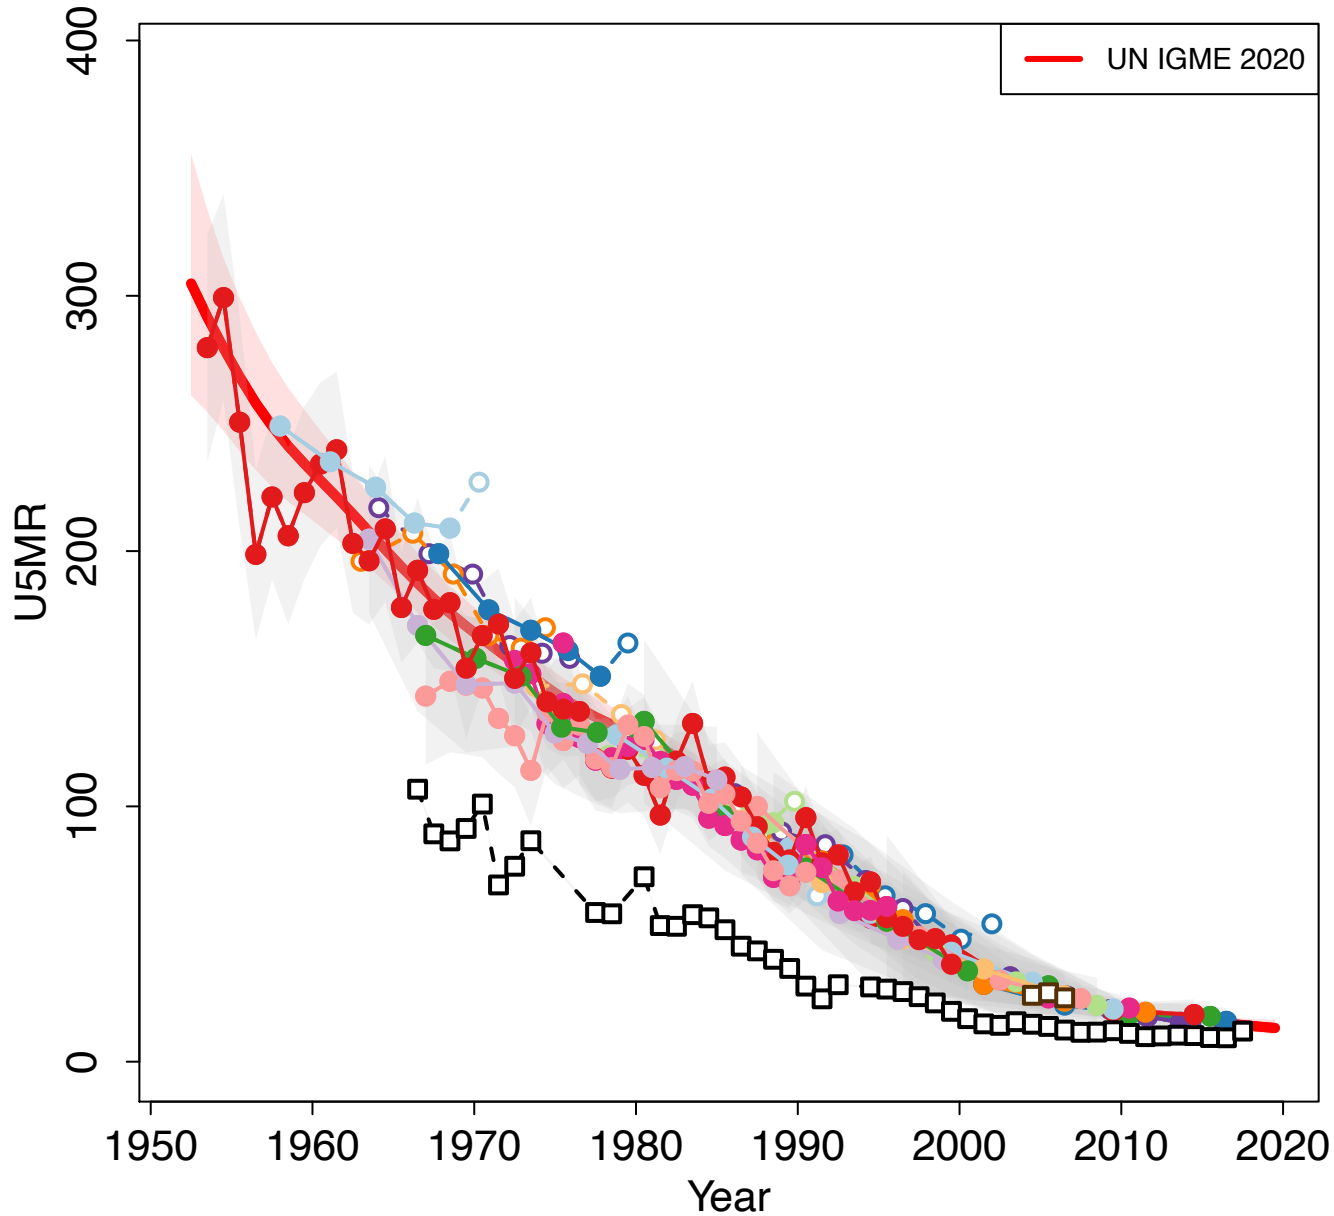

# Zoomed in

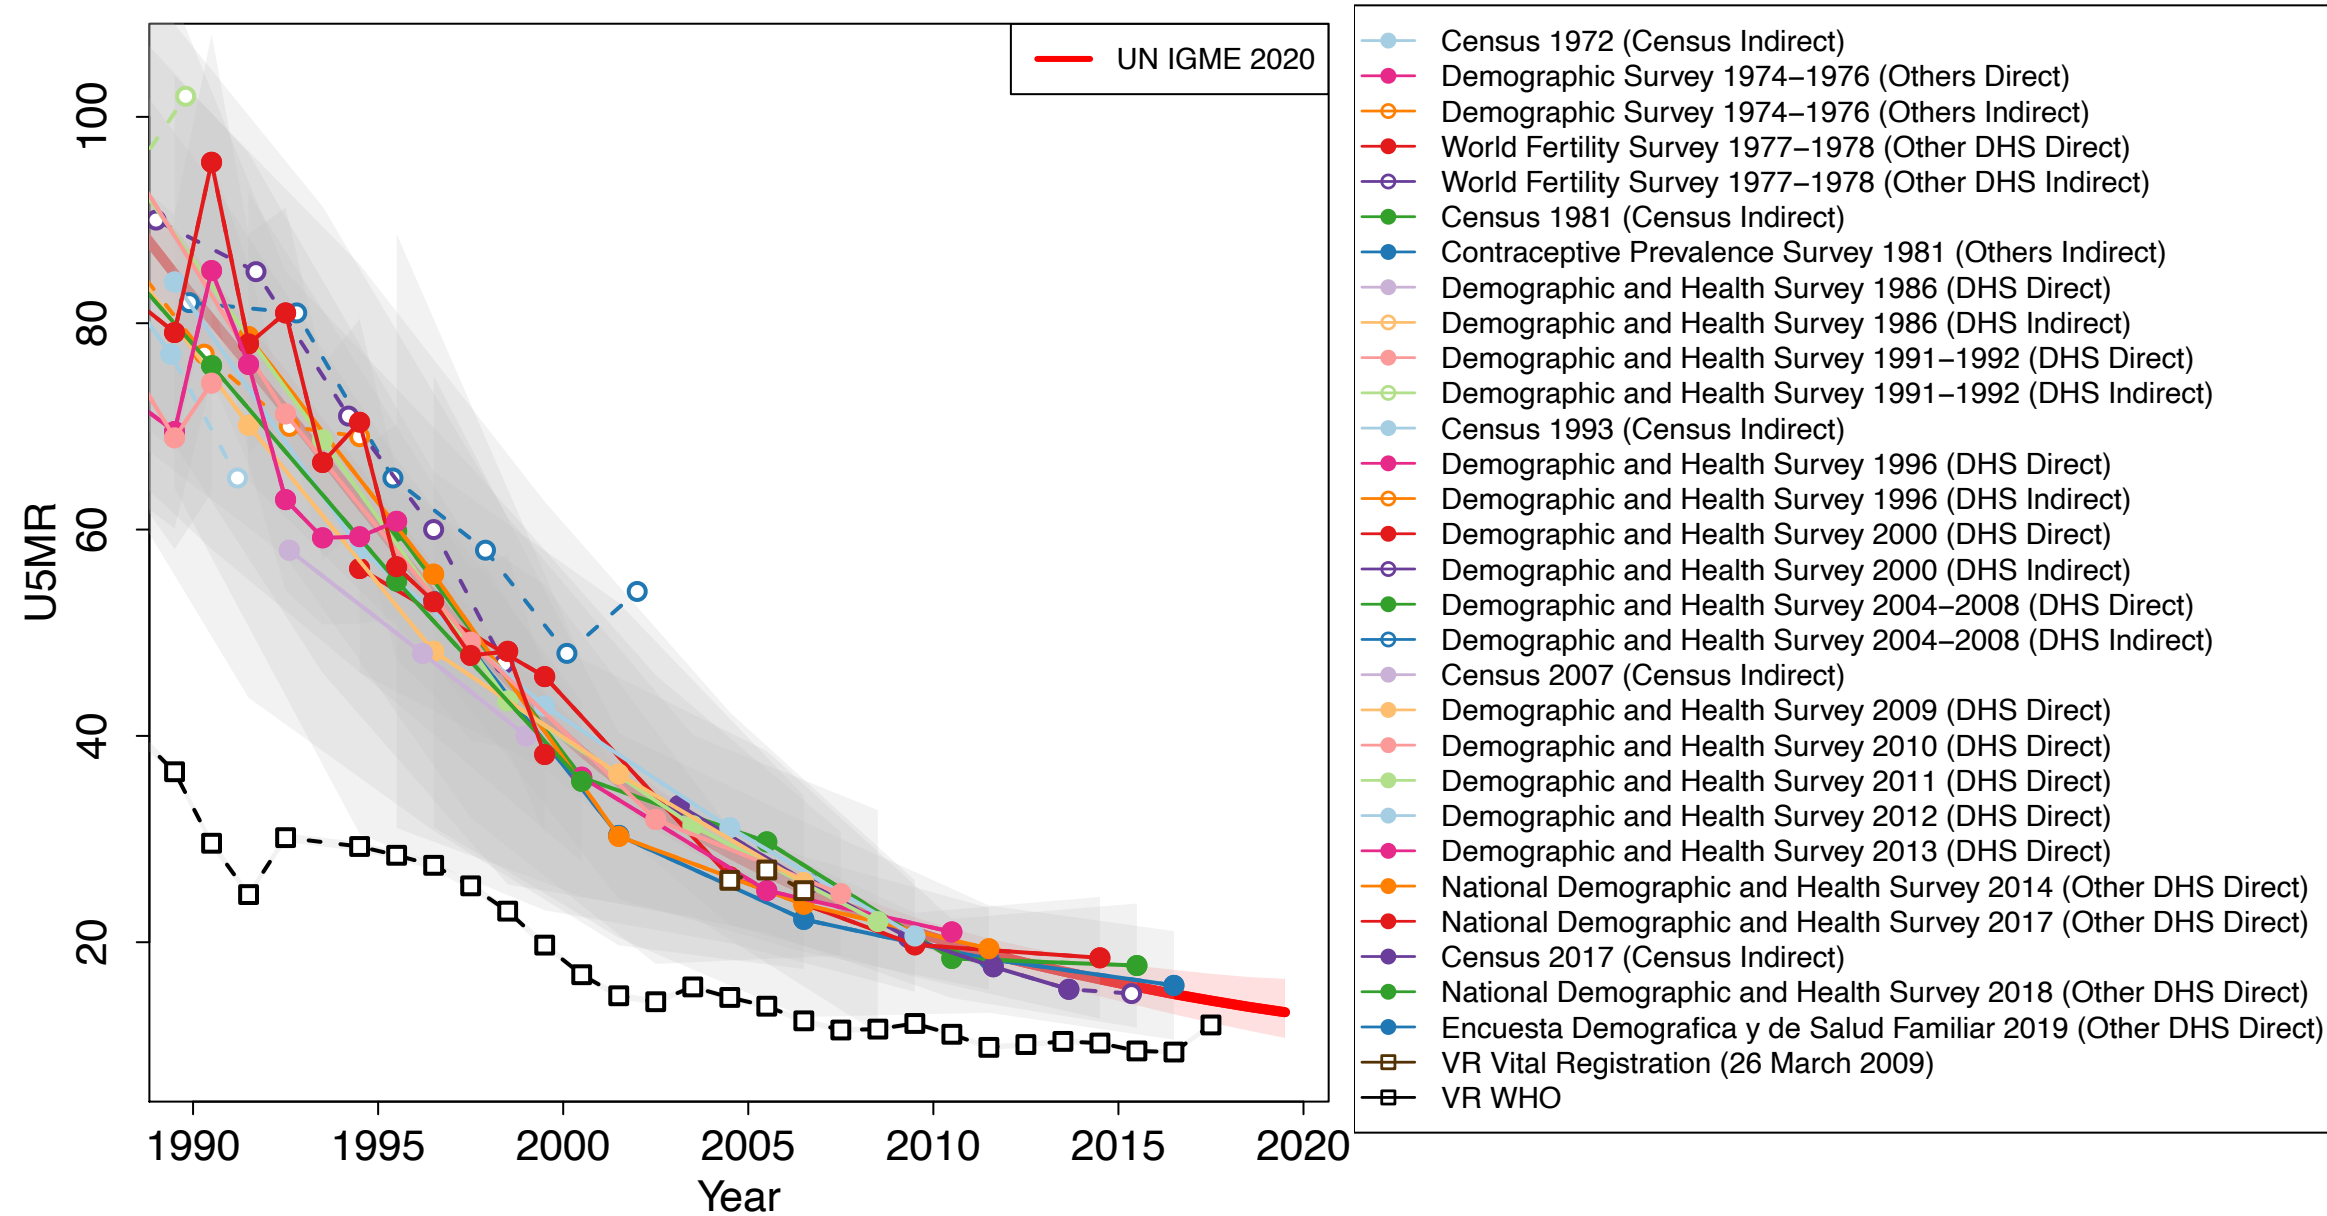

- Census 1972 (Census Indirect)
- Demographic Survey 1974–1976 (Others Direct)
- Demographic Survey 1974–1976 (Others Indirect)
- World Fertility Survey 1977–1978 (Other DHS Direct)
- World Fertility Survey 1977–1978 (Other DHS Indirect)
- Census 1981 (Census Indirect)
- Contraceptive Prevalence Survey 1981 (Others Indirect)
- Demographic and Health Survey 1986 (DHS Direct)
- Demographic and Health Survey 1986 (DHS Indirect)
- Demographic and Health Survey 1991–1992 (DHS Direct)
- Demographic and Health Survey 1991–1992 (DHS Indirect)
- Census 1993 (Census Indirect)
- Demographic and Health Survey 1996 (DHS Direct)
- Demographic and Health Survey 1996 (DHS Indirect)
- Demographic and Health Survey 2000 (DHS Direct)
- Demographic and Health Survey 2000 (DHS Indirect)
- Demographic and Health Survey 2004–2008 (DHS Direct)
- Demographic and Health Survey 2004–2008 (DHS Indirect)
- Census 2007 (Census Indirect)
- Demographic and Health Survey 2009 (DHS Direct)
- Demographic and Health Survey 2010 (DHS Direct)
- Demographic and Health Survey 2011 (DHS Direct)
- Demographic and Health Survey 2012 (DHS Direct)
- Demographic and Health Survey 2013 (DHS Direct)
- National Demographic and Health Survey 2014 (Other DHS Direct)
- National Demographic and Health Survey 2017 (Other DHS Direct)
- Census 2017 (Census Indirect)
- National Demographic and Health Survey 2018 (Other DHS Direct)
- Encuesta Demografica y de Salud Familiar 2019 (Other DHS Direct)
- VR Vital Registration (26 March 2009)
- VR WHO

# Philippines

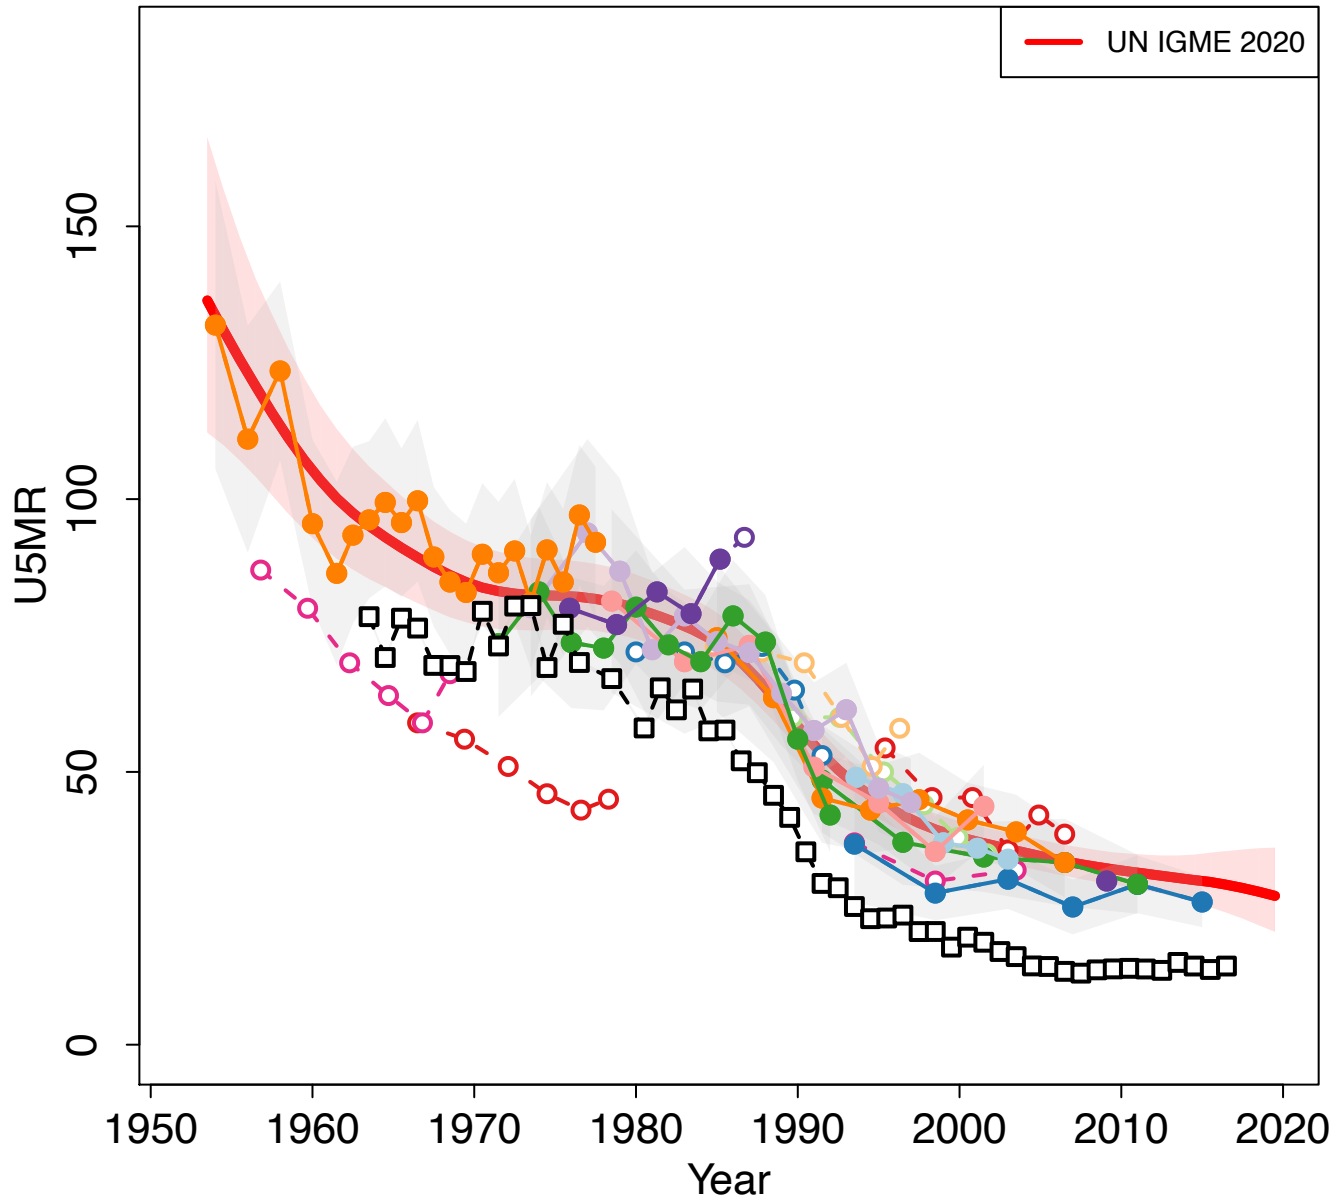

# Zoomed in

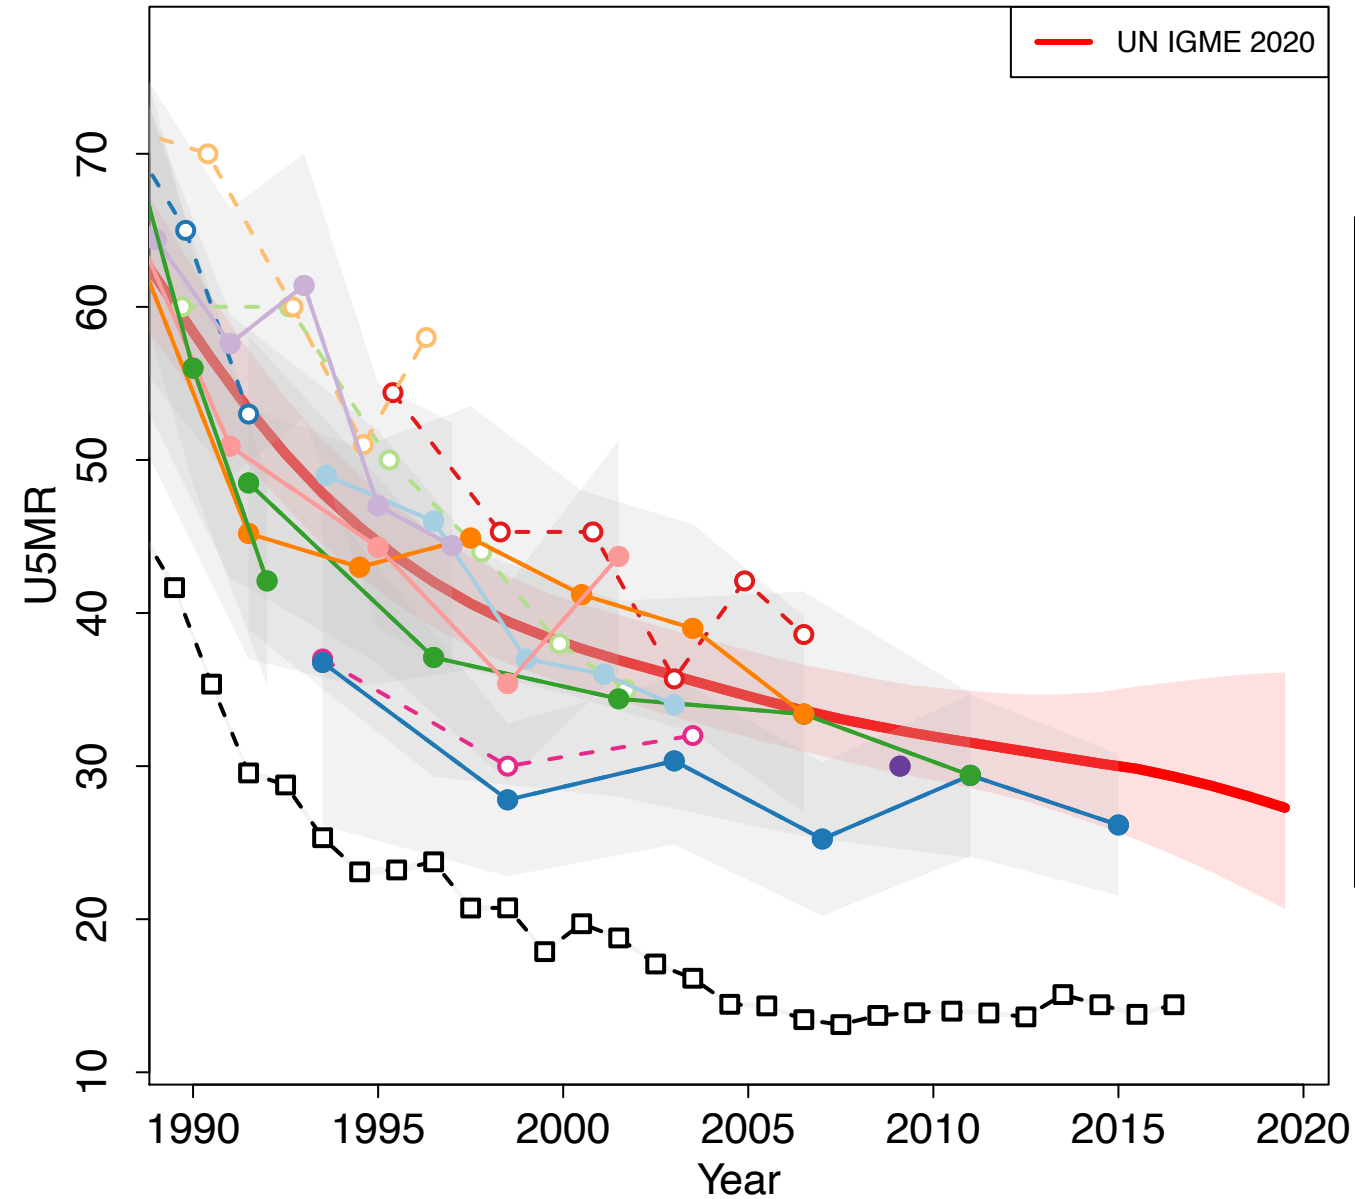

- Census 1970 (Census Indirect)
- World Fertility Survey 1978 (Other DHS Direct)
- Census 1980 (Census Indirect)
- Demographic Survey 1988 (Others Indirect)
- Demographic and Health Survey 1993 (DHS Direct)
- Demographic and Health Survey 1993 (DHS Indirect)
- Demographic and Health Survey 1998 (DHS Direct)
- Demographic and Health Survey 1998 (DHS Indirect)
- Demographic and Health Survey 2003 (DHS Direct)
- Demographic and Health Survey 2003 (DHS Indirect)
- Family Planning Survey 2006 (Others Indirect)
- Family Planning Survey 2006 (Others Direct)
- Demographic and Health Survey 2008 (DHS Direct)
- Demographic and Health Survey 2008 (DHS Indirect)
- Family Health Survey 2011 (Others Direct)
- National Demographic and Health Survey 2013 (DHS Direct)
- Demographic and Health Survey 2017 (DHS Direct)
- VR WHO

### Poland

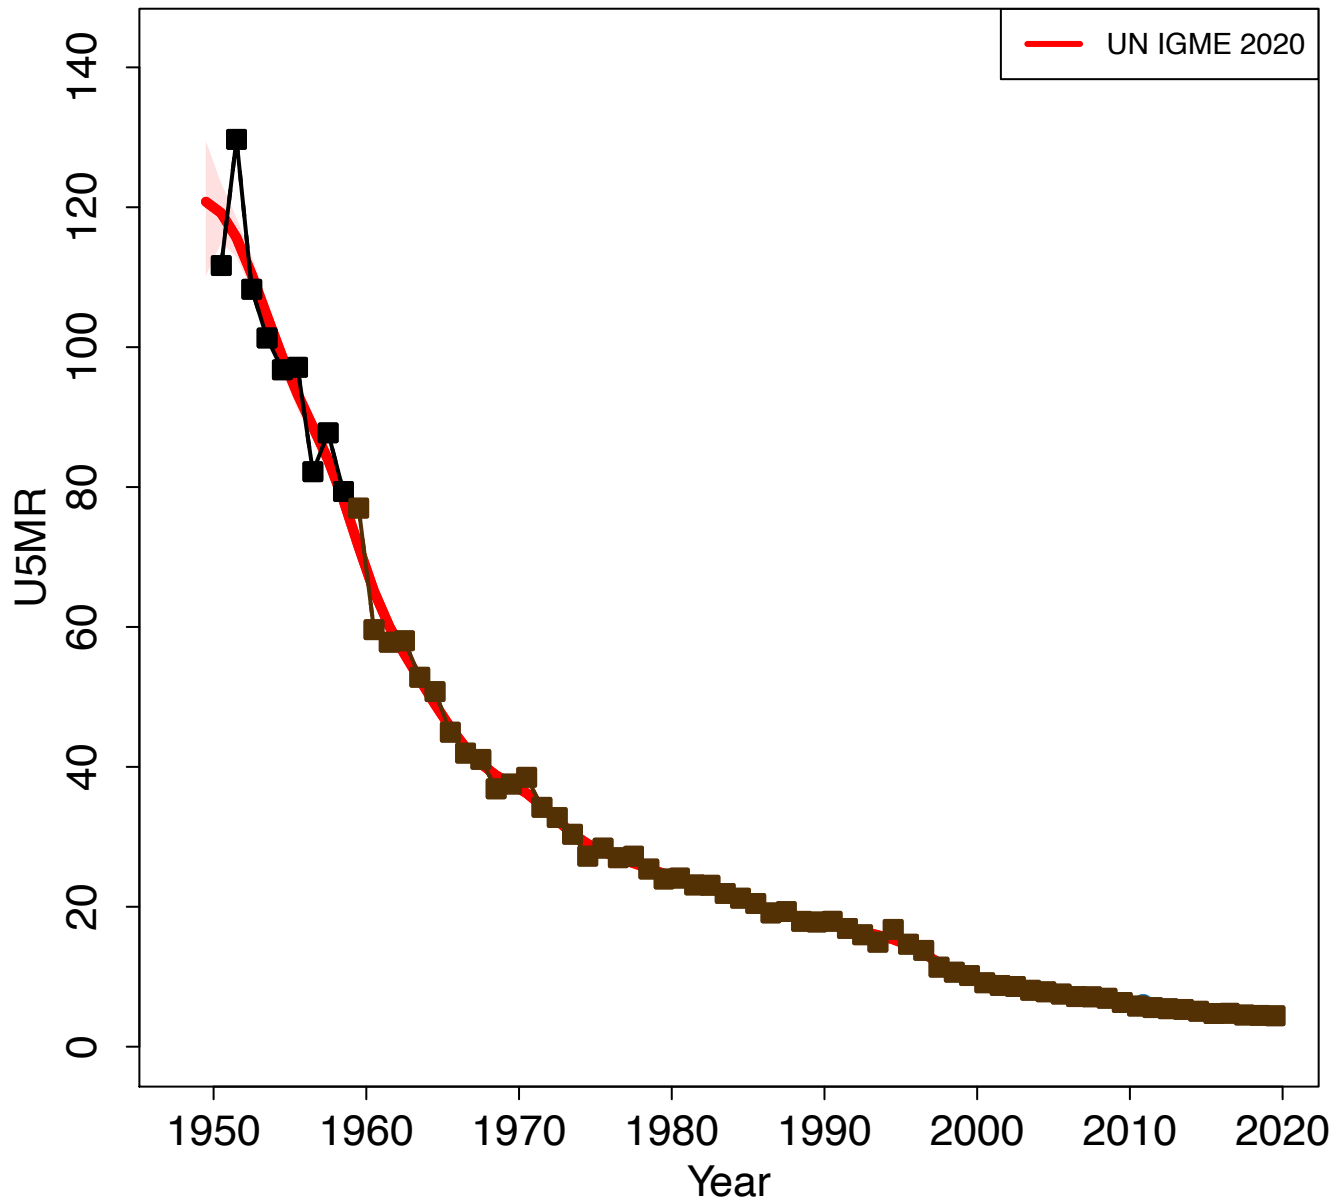

### Zoomed in

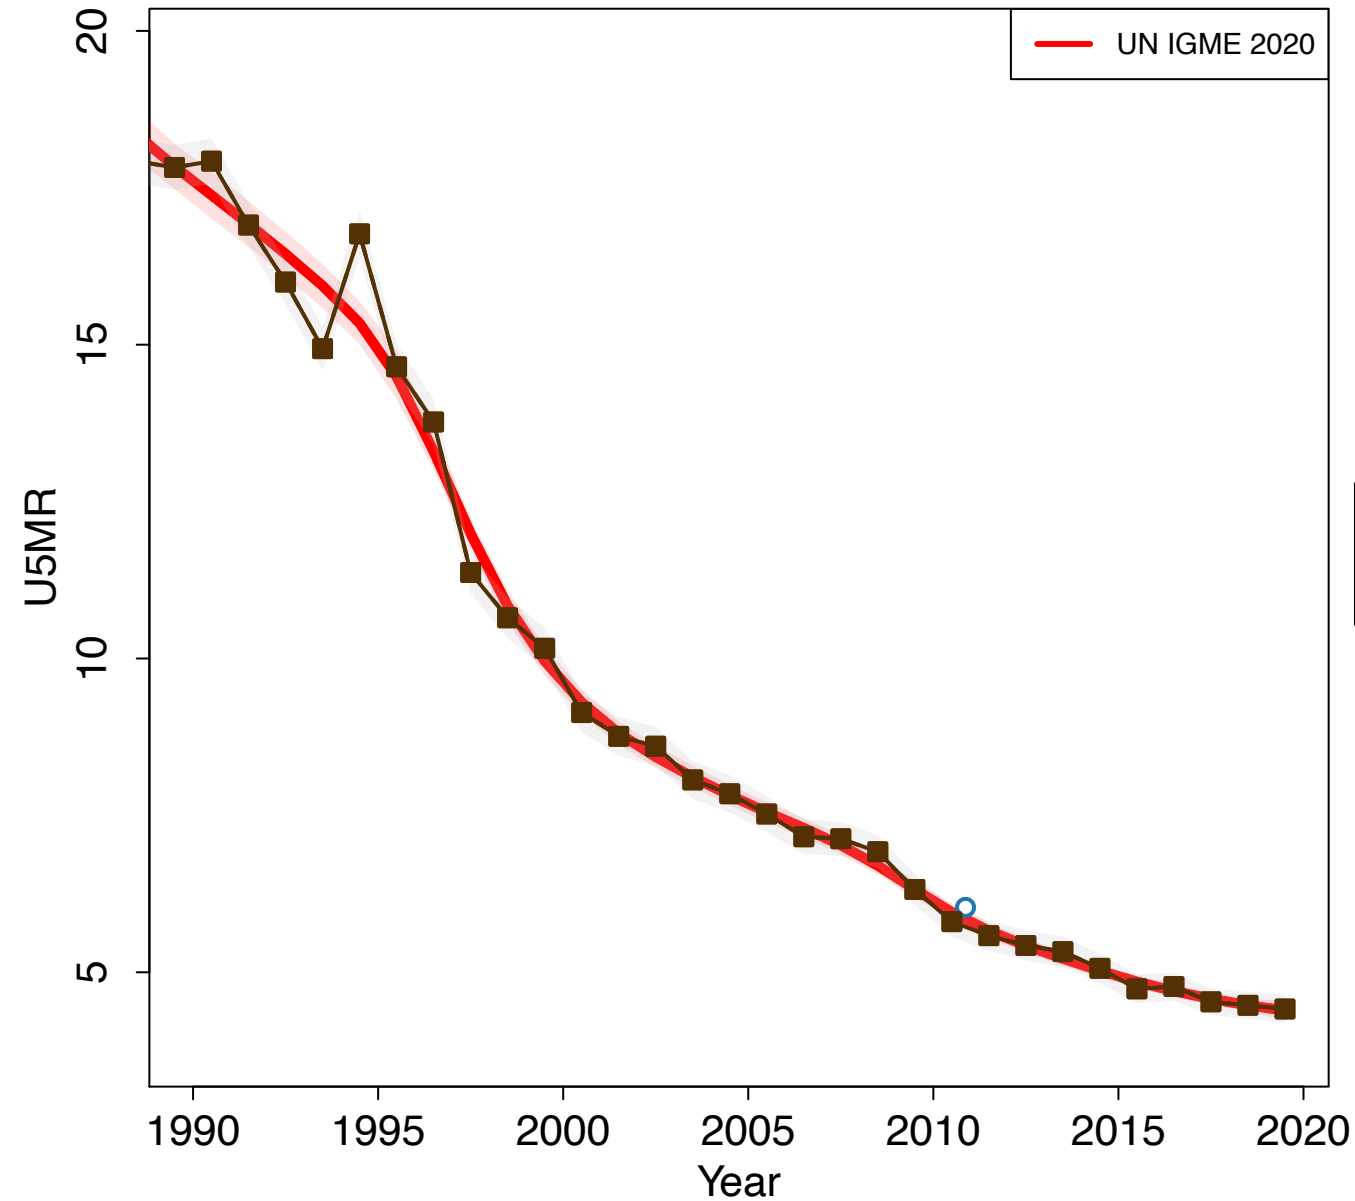

# Portugal

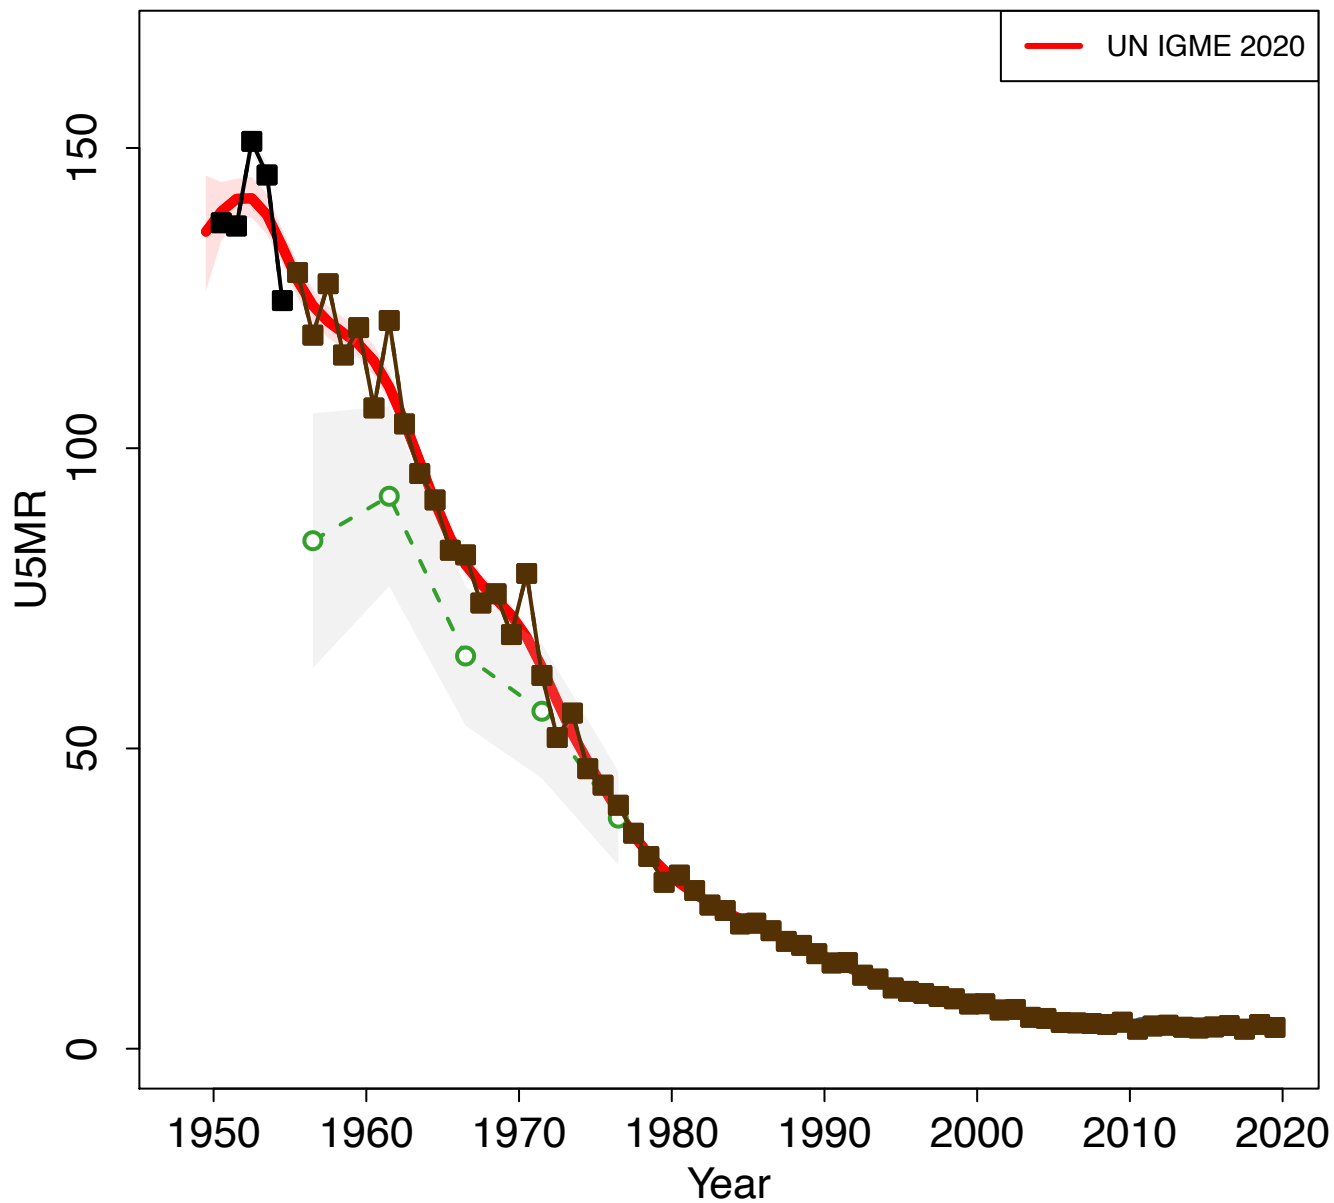

# Zoomed in

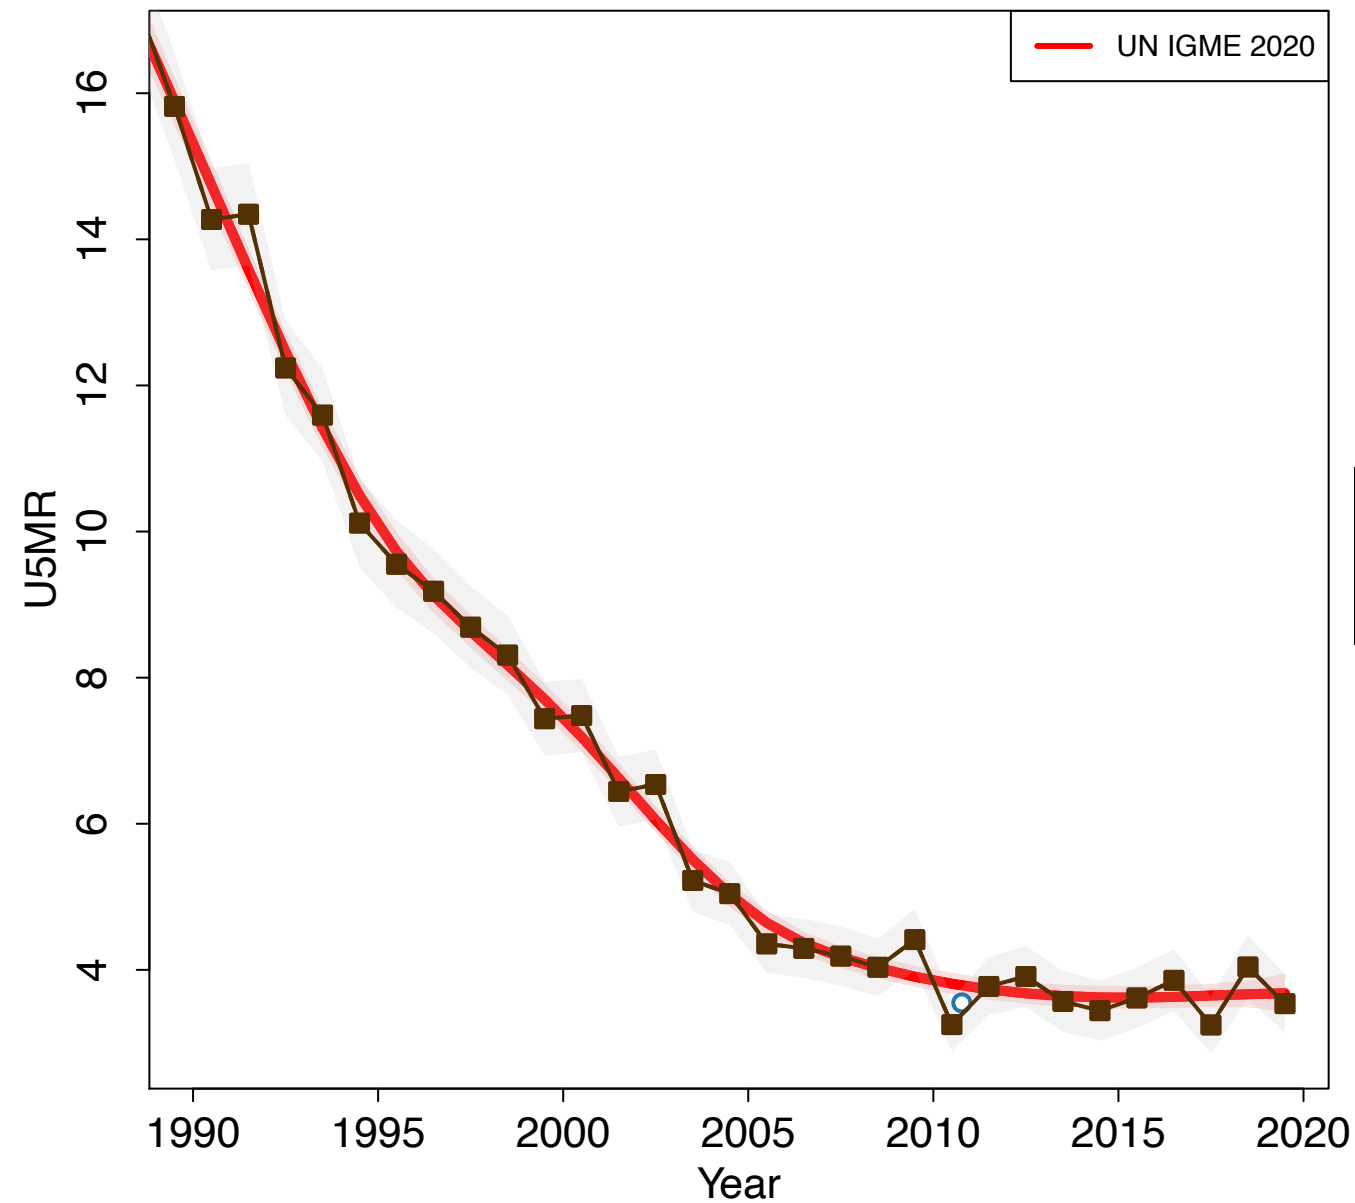

### Qatar

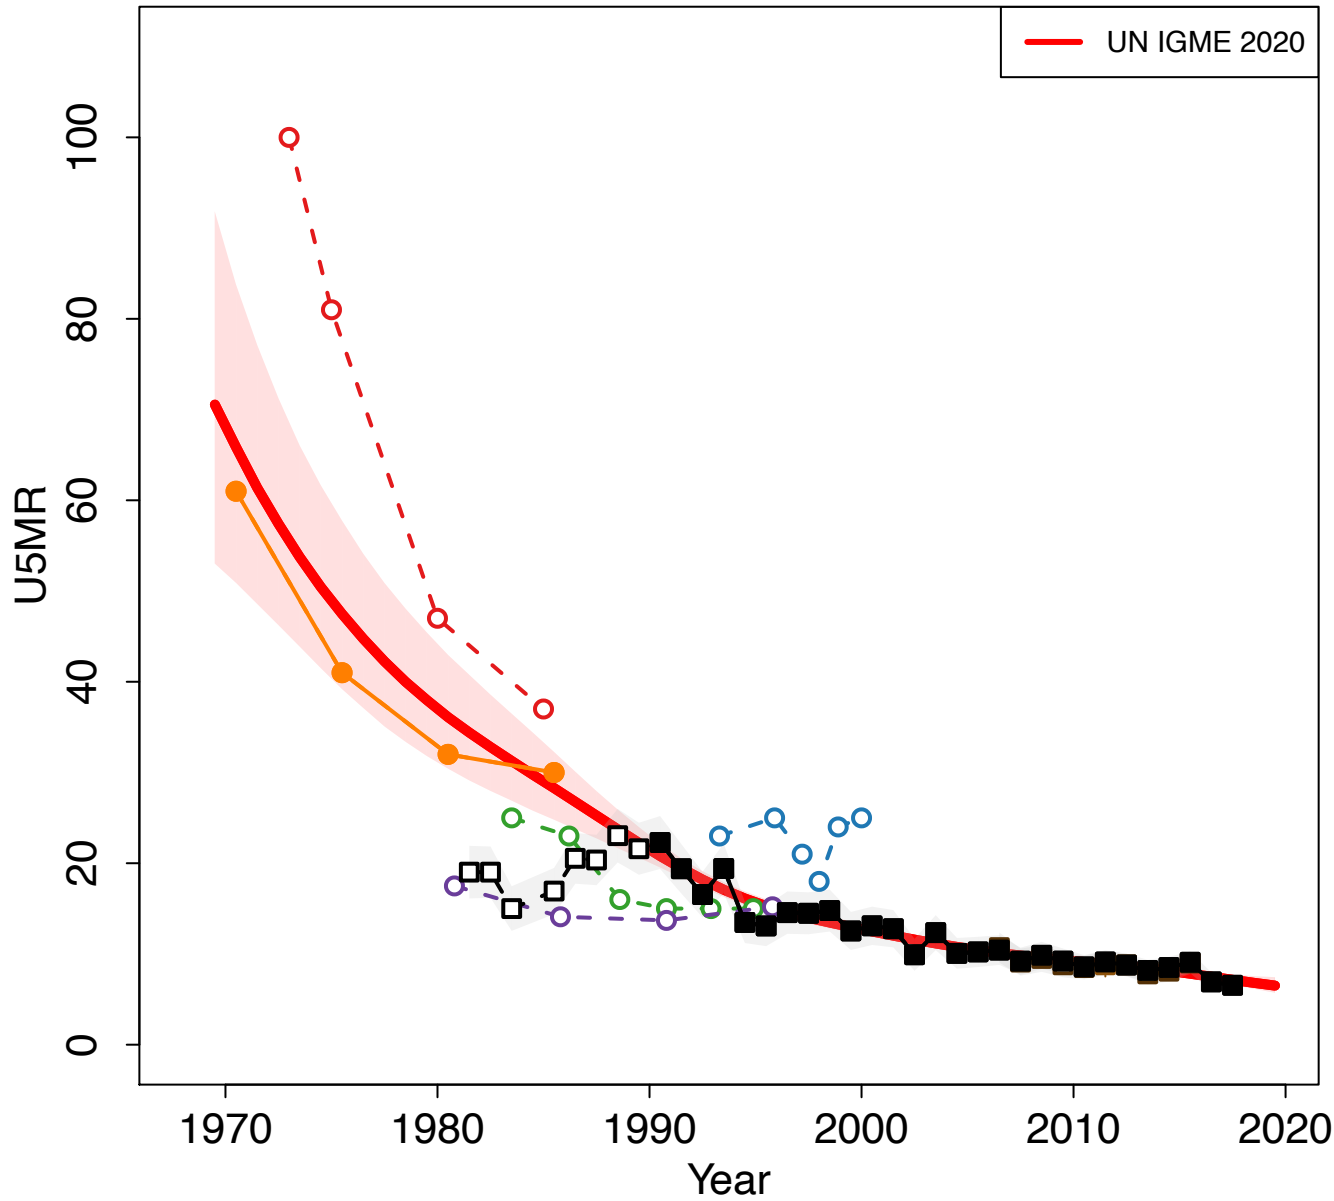

### Zoomed in

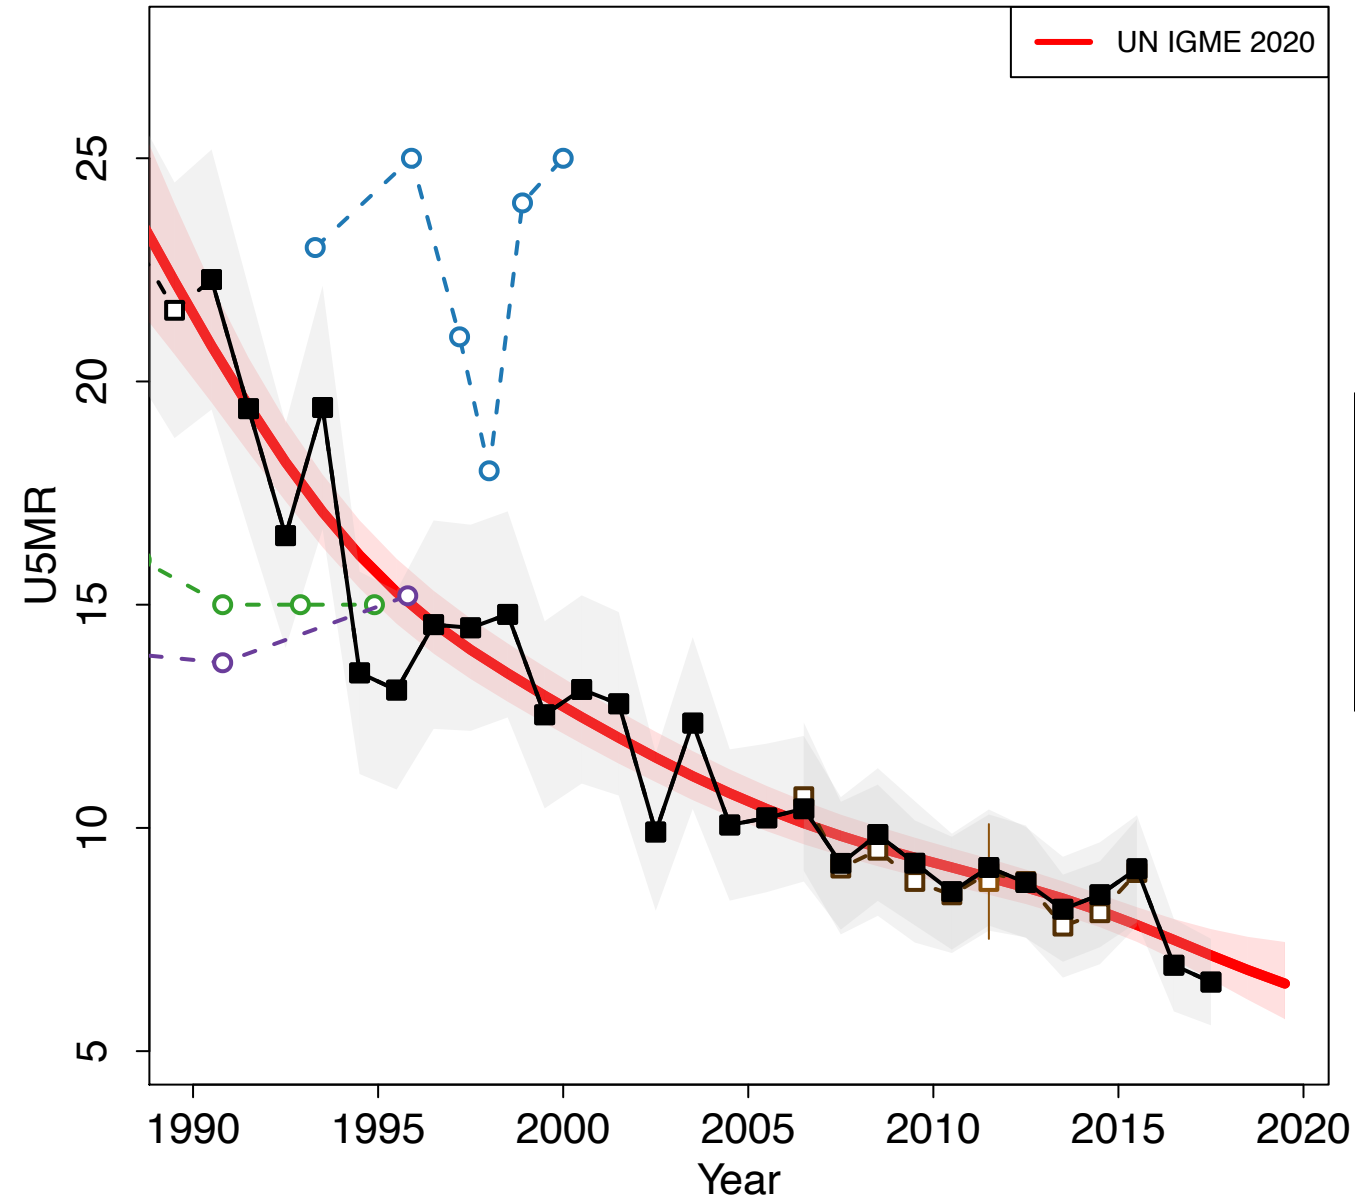

### Romania

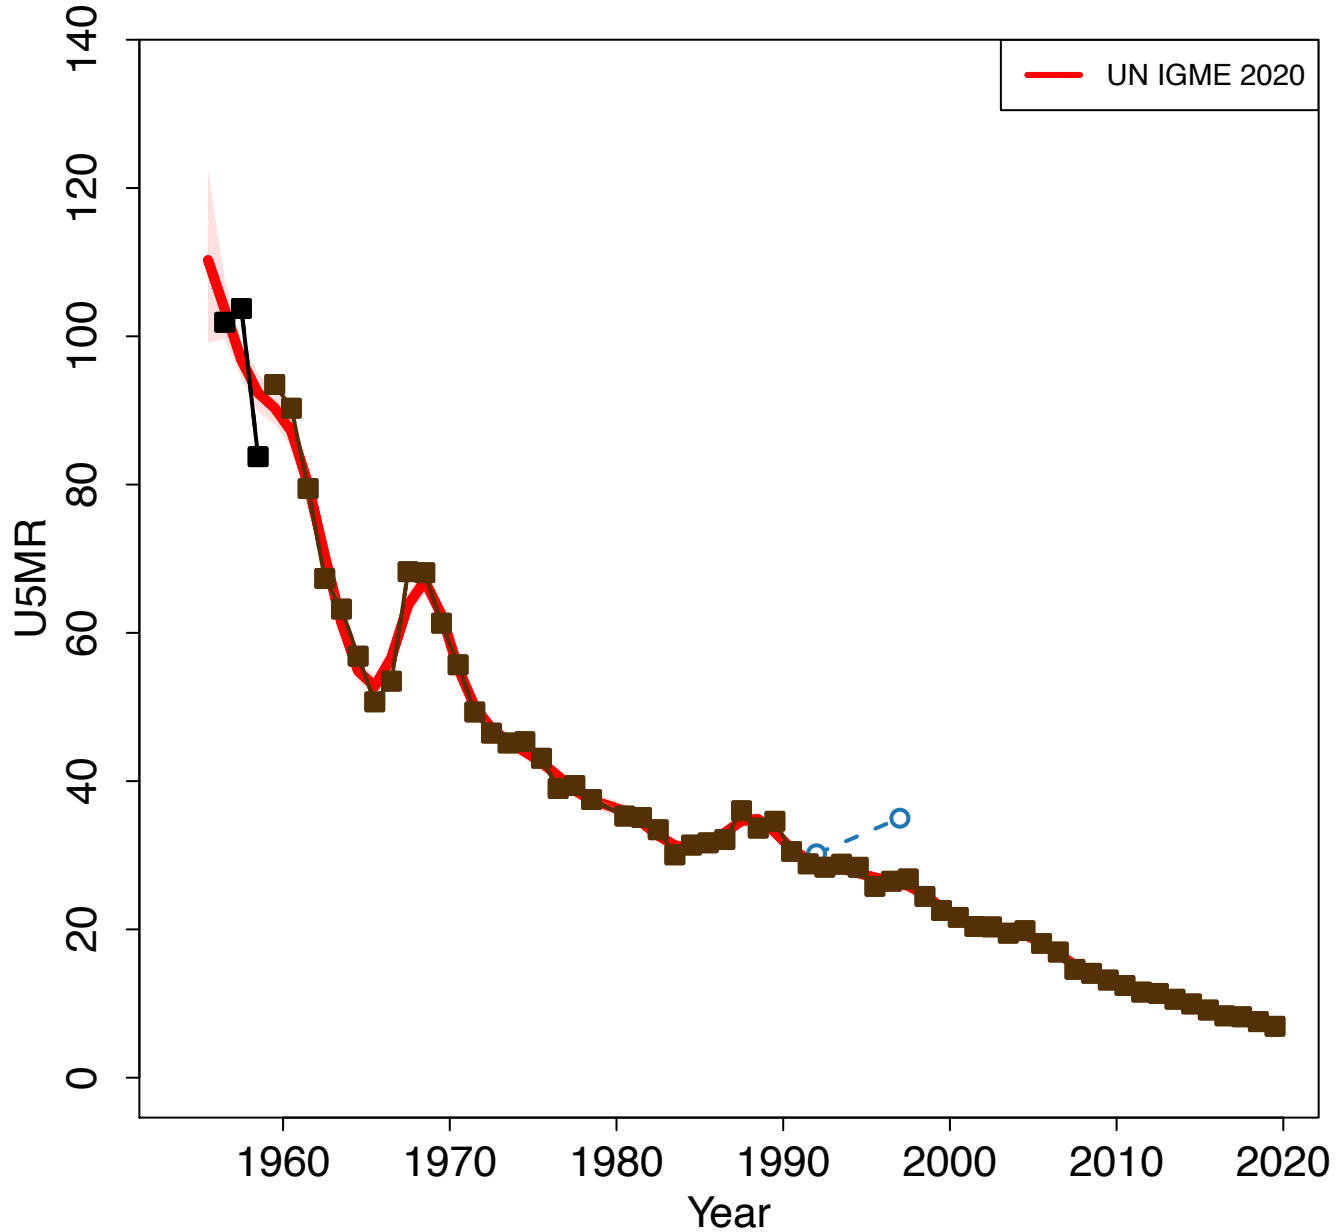

### Zoomed in

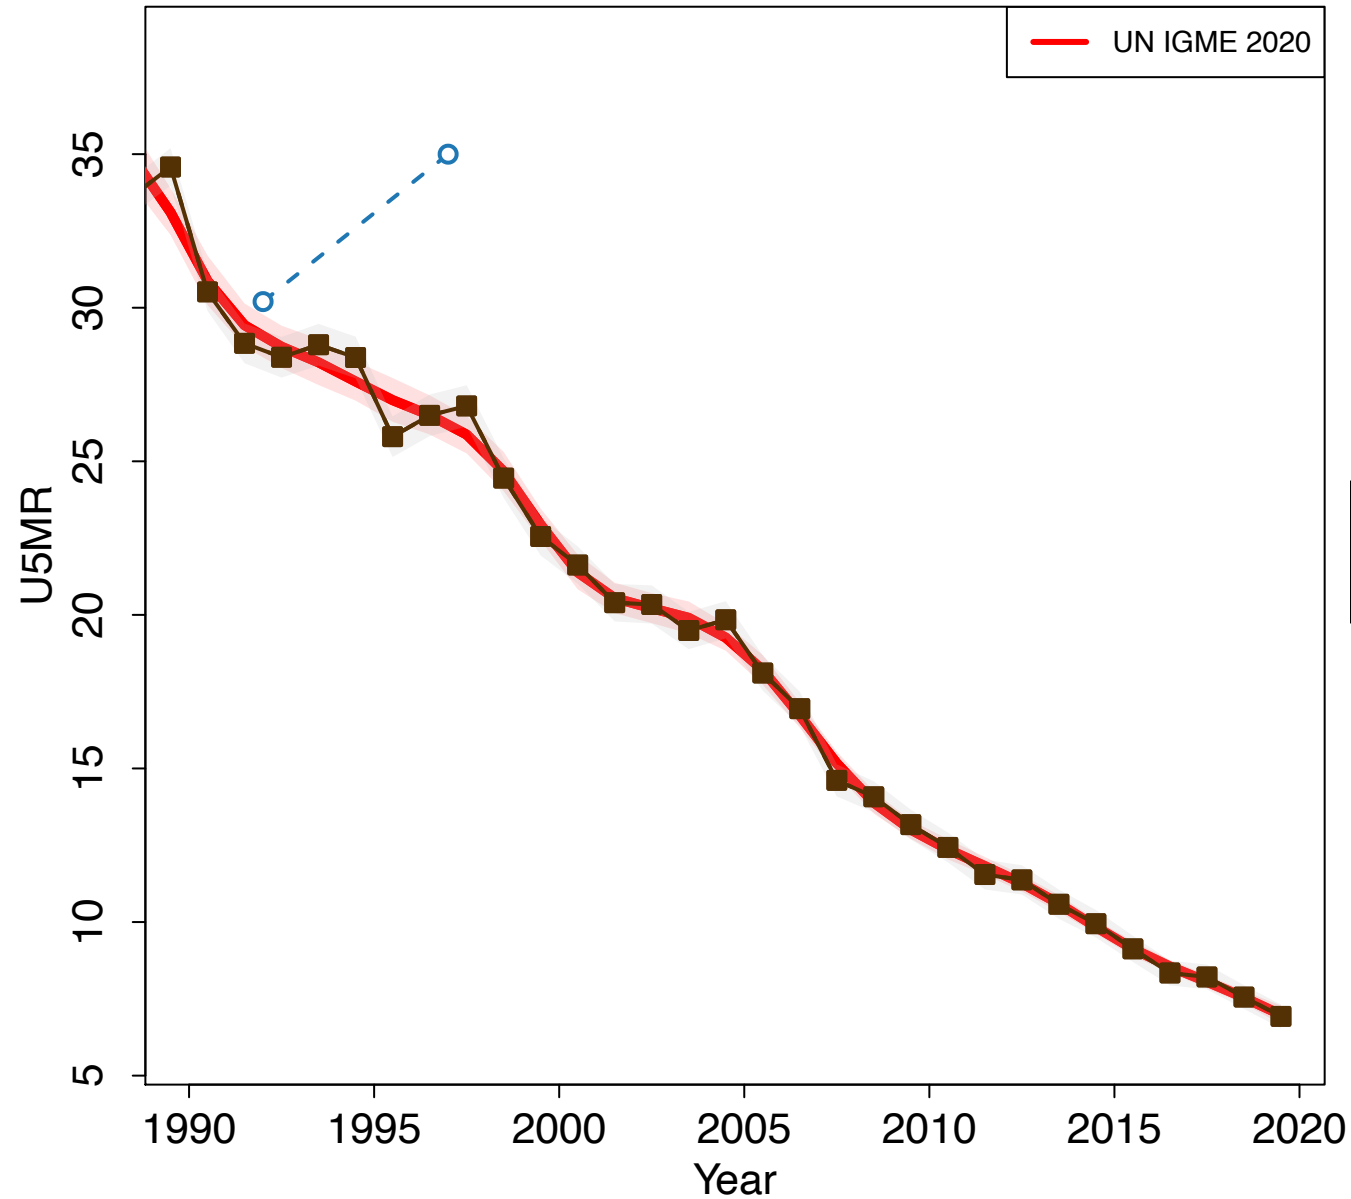

### Russian Federation

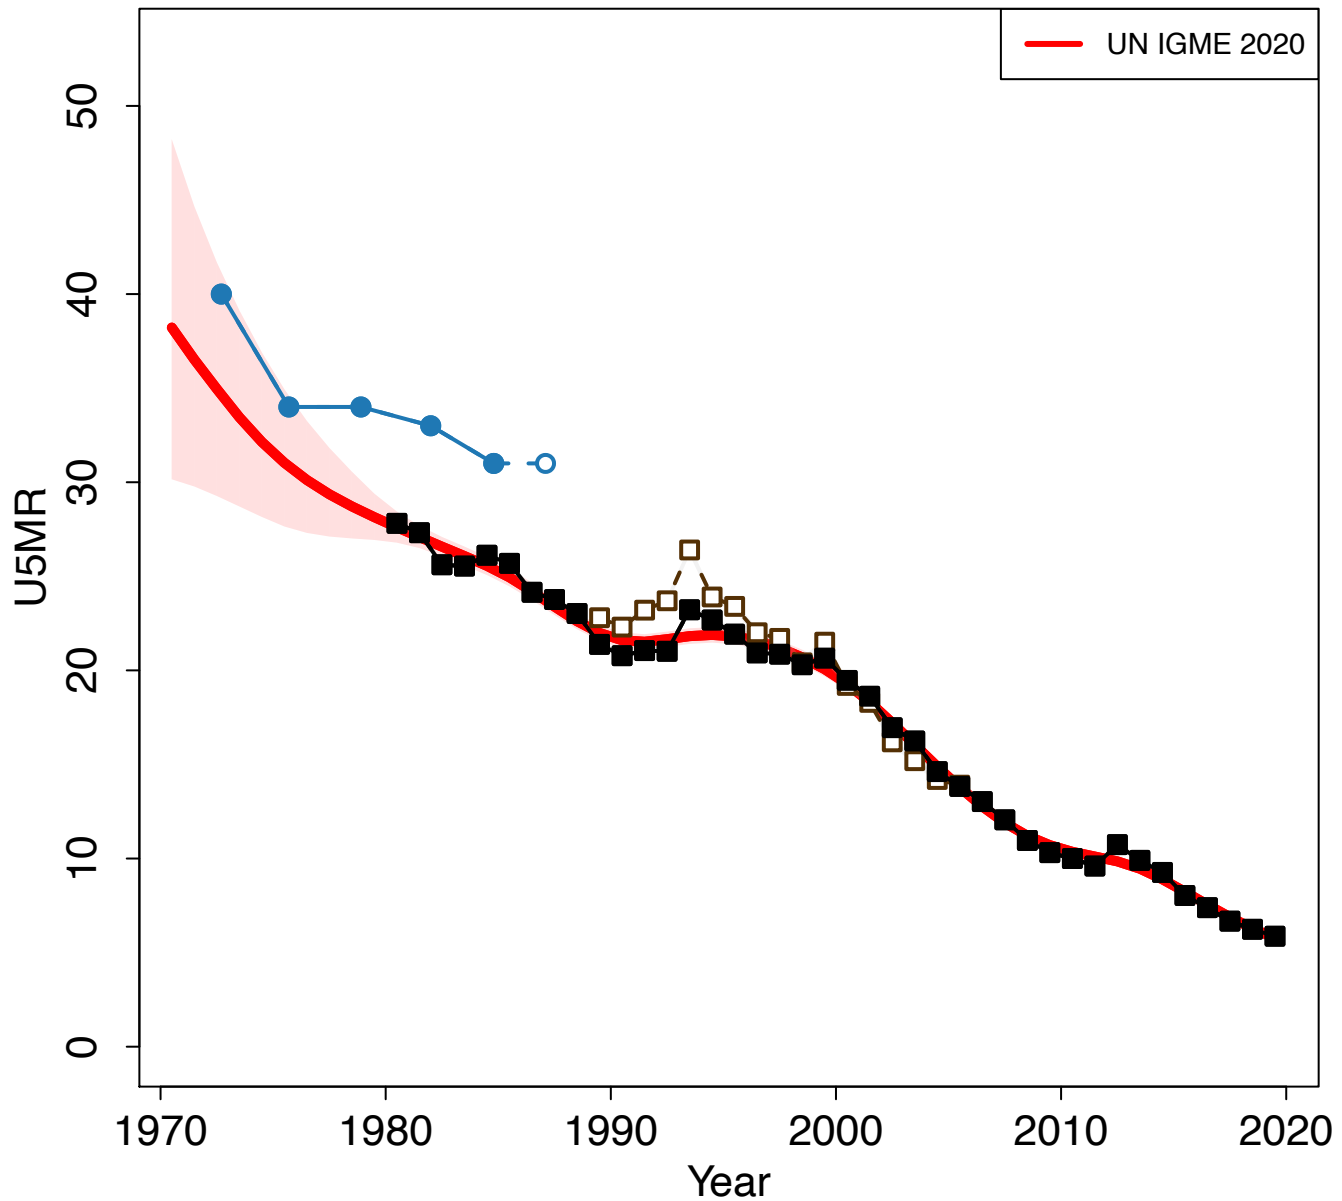

### Zoomed in

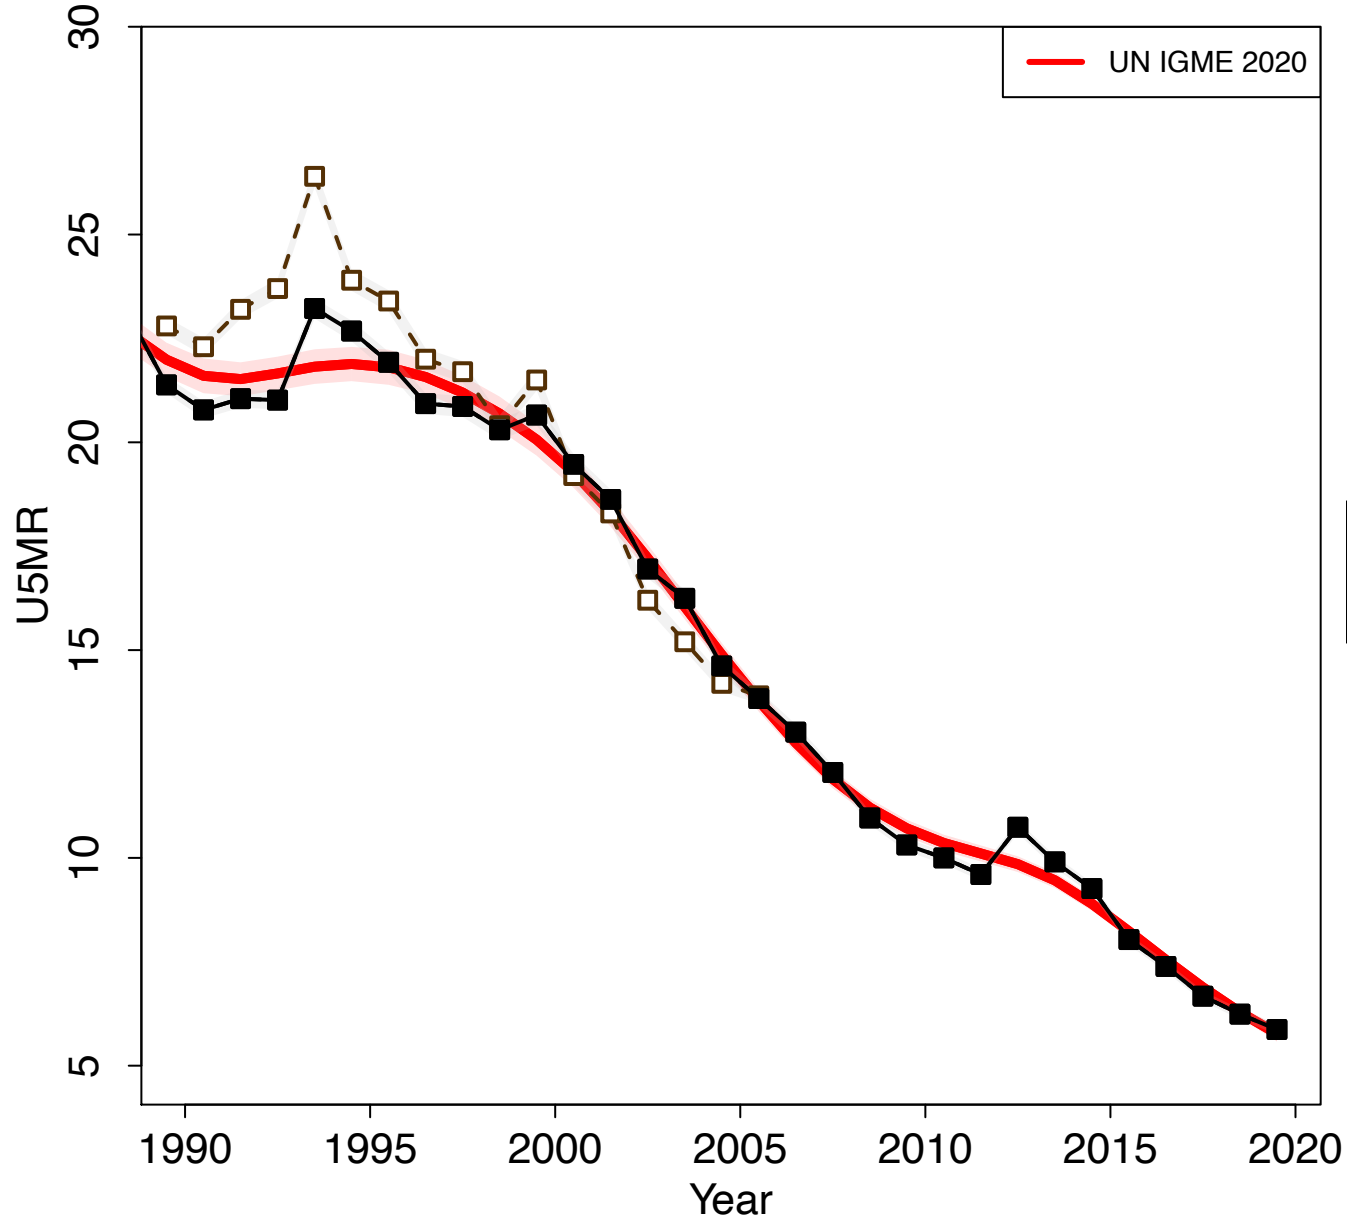



### Rwanda

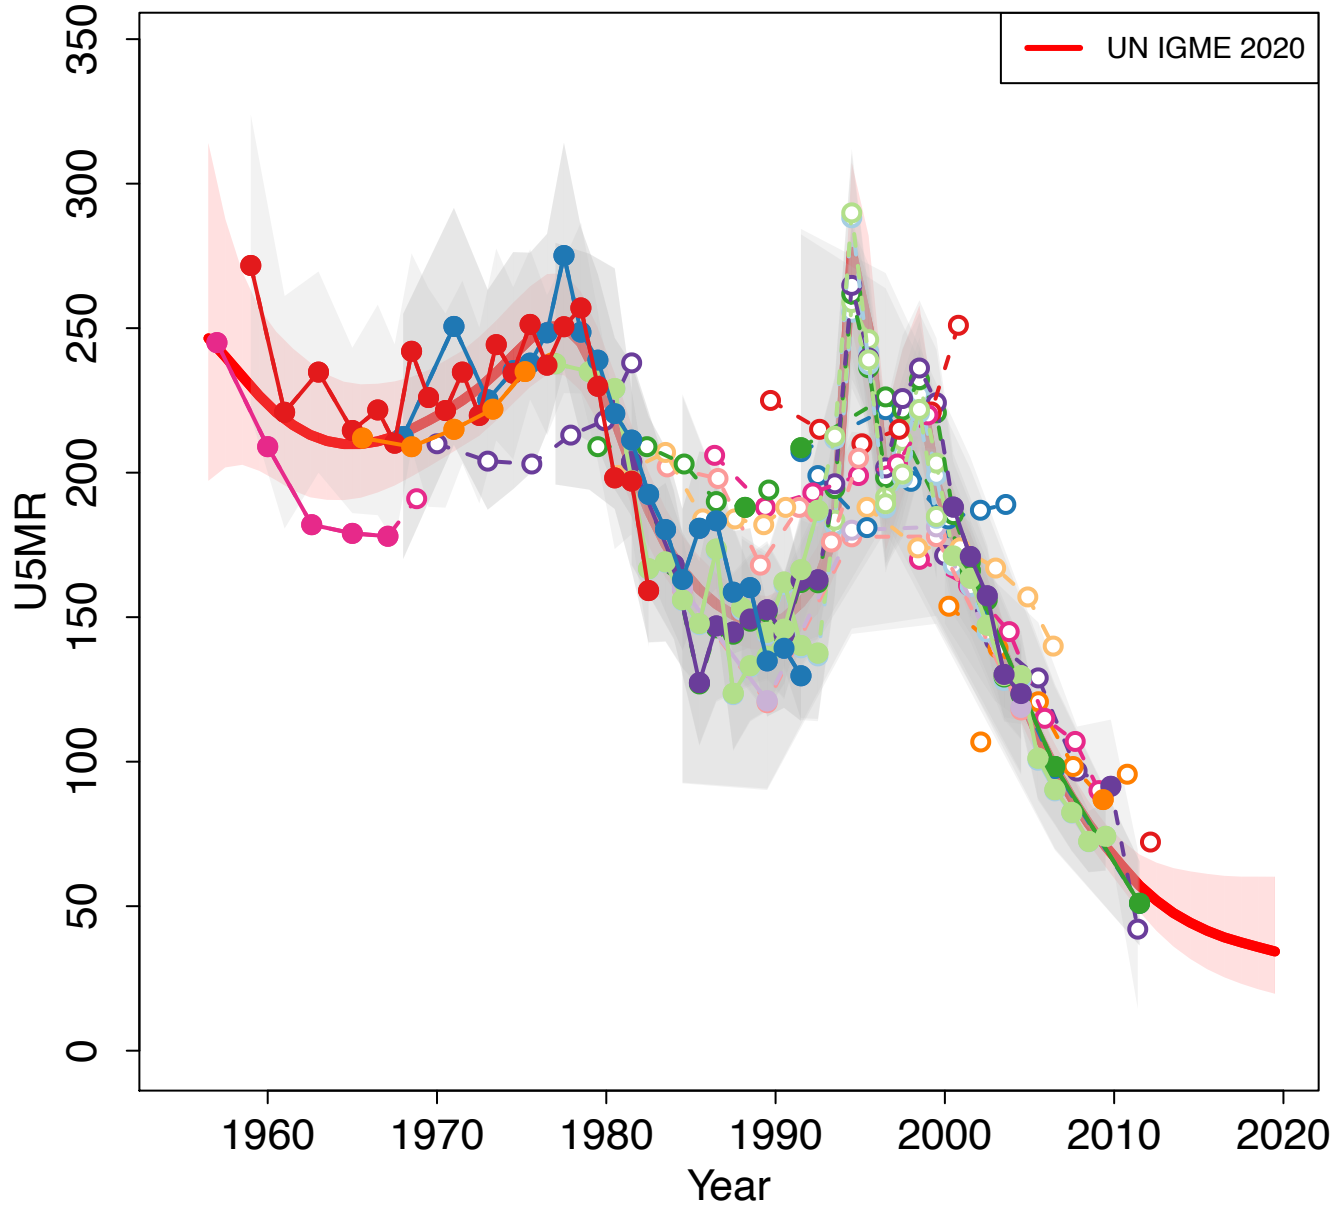

### Zoomed in

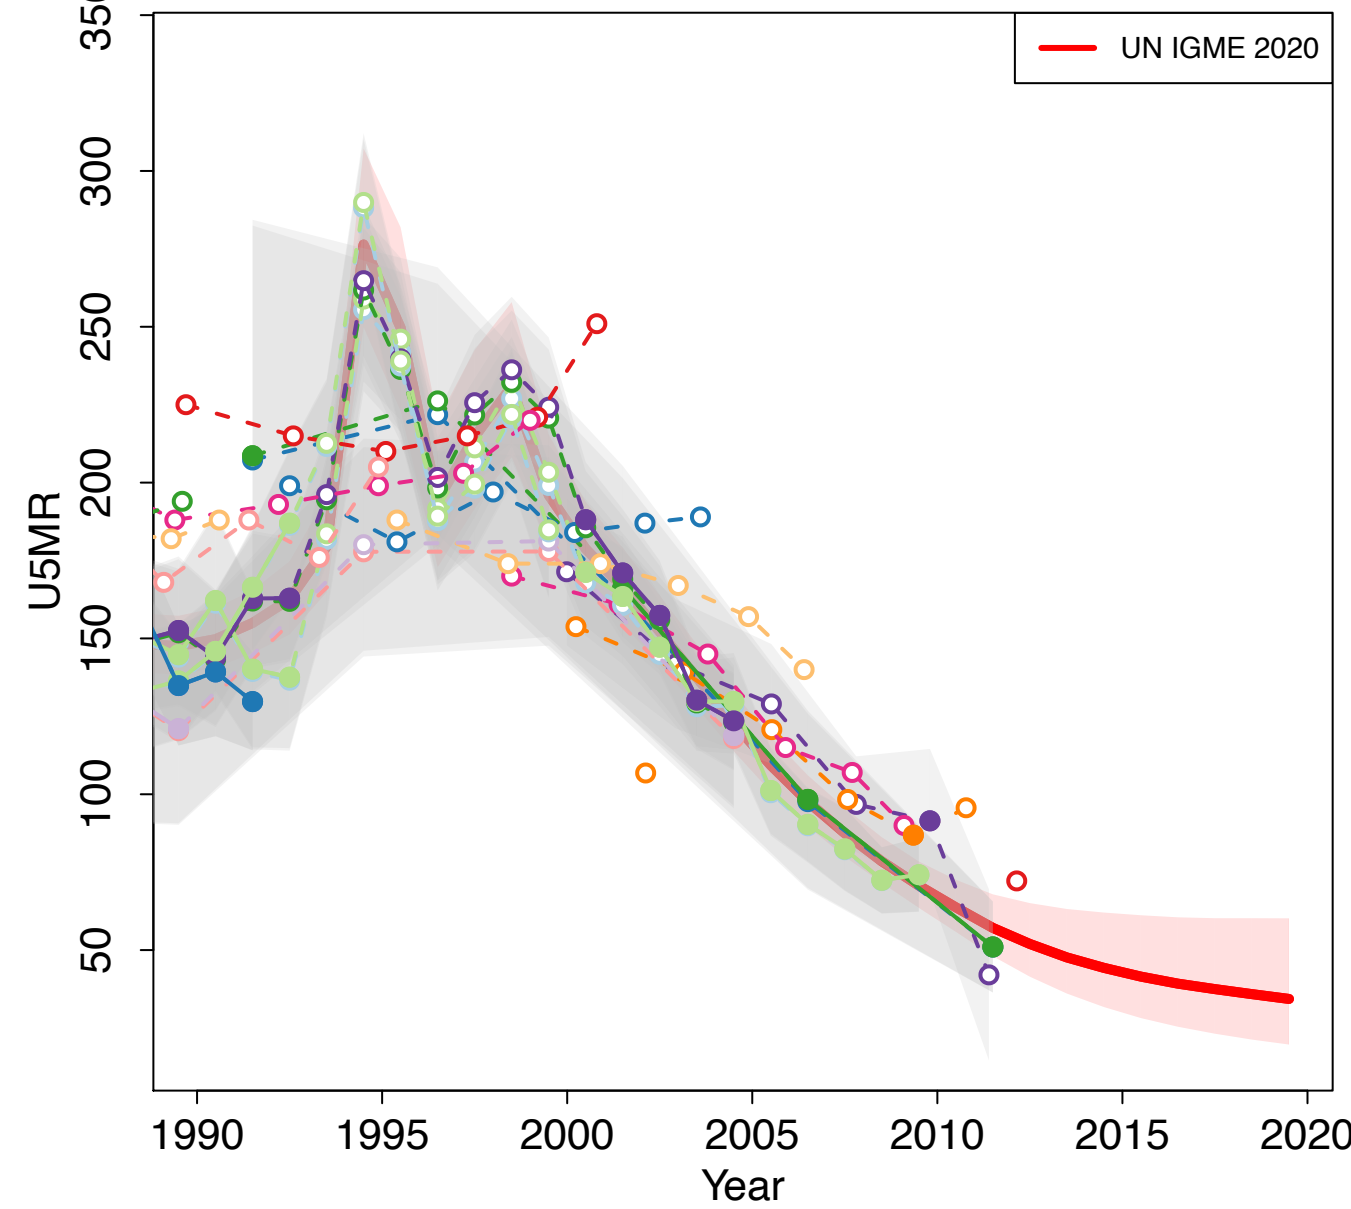

- Demographic Survey 1970 (Others Indirect)
- Census 1978 (Census Indirect)
- World Fertility Survey 1983 (Other DHS Direct)
- World Fertility Survey 1983 (Other DHS Indirect)
- Census 1991 (Census Indirect)
- Demographic and Health Survey (MM adjusted) 1992 (DHS Direct)
- Demographic and Health Survey 1992 (DHS Direct)
- Demographic and Health Survey 1992 (DHS Indirect)
- Socio-demographic Survey 1996 (Others Indirect)
- Demographic and Health Survey (MM adjusted) 2000 (DHS Direct)
- Demographic and Health Survey 2000 (DHS Direct)
- Demographic and Health Survey 2000 (DHS Indirect)
- Census 2002 (Others Household Deaths)
- Census 2002 (Census Indirect)
- Demographic and Health Survey (MM adjusted) 2005 (DHS Direct)
- Demographic and Health Survey 2005 (DHS Direct)
- Demographic and Health Survey 2005 (DHS Indirect)
- Interim Demographic and Health Survey (MM adjusted) 2007-2008 (Other DHS Direct)
- Demographic and Health Survey Adjusted by adding 20 points 2007-2008 (Other DHS Indirect)
- Interim Demographic and Health Survey 2007-2008 (Other DHS Direct)
- Demographic and Health Survey (MM adjusted) 2010 (DHS Direct)
- Demographic and Health Survey 2010 (DHS Direct)
- Demographic and Health Survey 2010 (DHS Indirect)
- Census 2012 (Census Indirect)
- Census 2012 (Others Household Deaths)
- Malaria Indicator Survey 2013 (Other DHS Indirect)
- Demographic and Health Survey (MM adjusted) 2014-2015 (DHS Direct)
- Demographic and Health Survey 2014-2015 (DHS Direct)

### Saint Kitts and Nevis

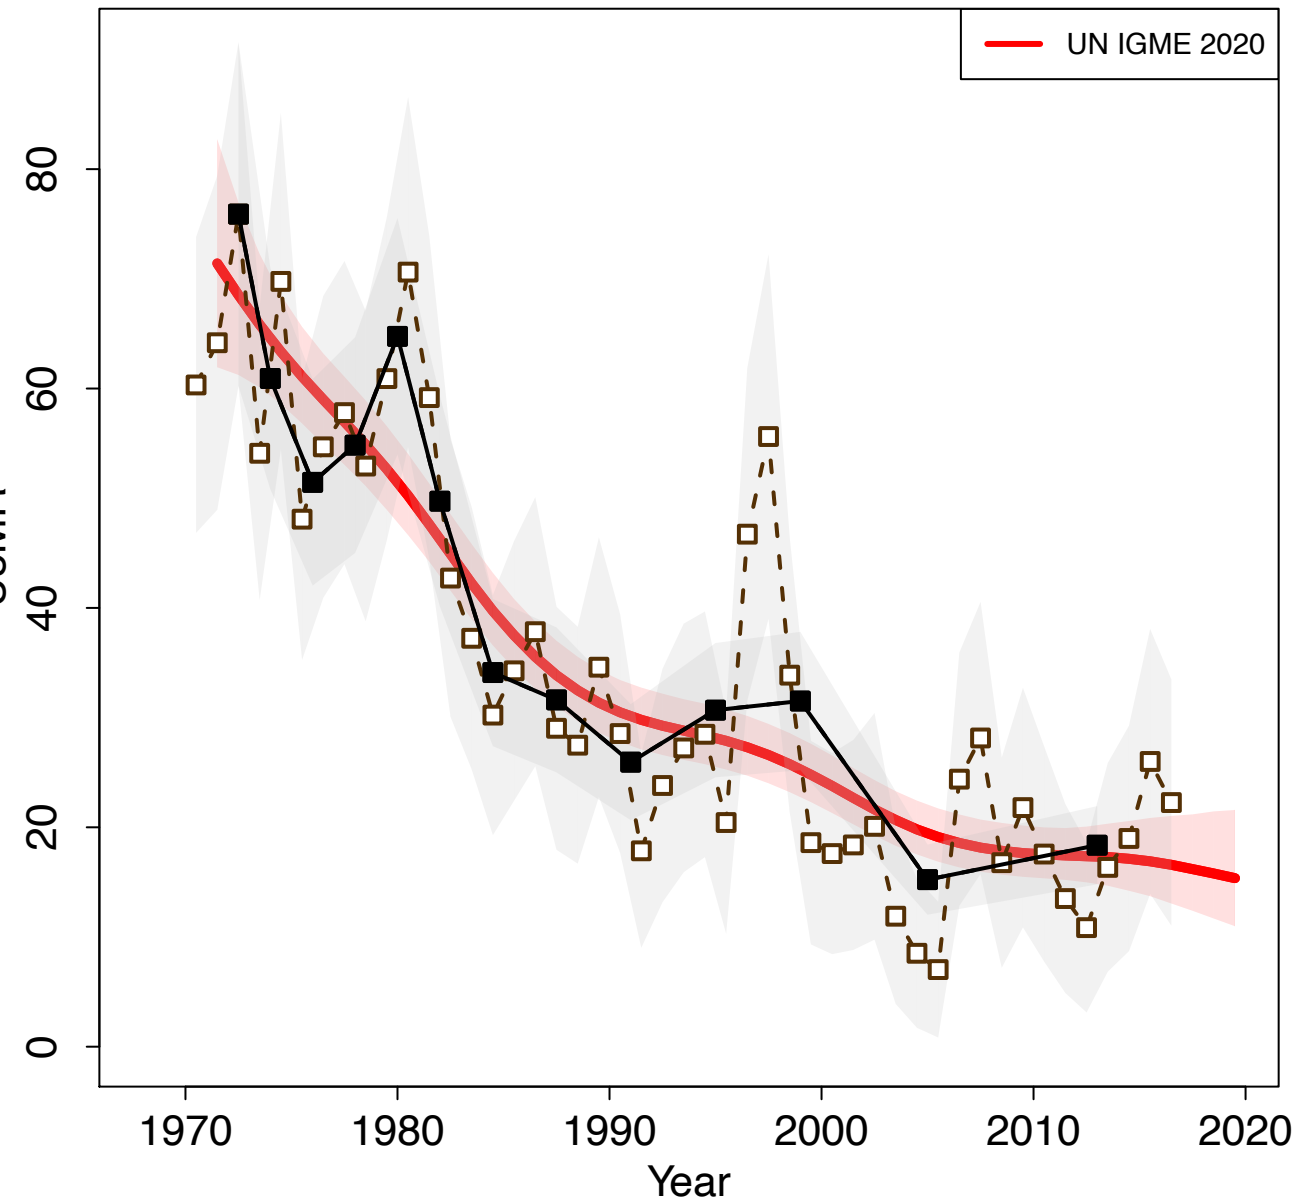

### Zoomed in

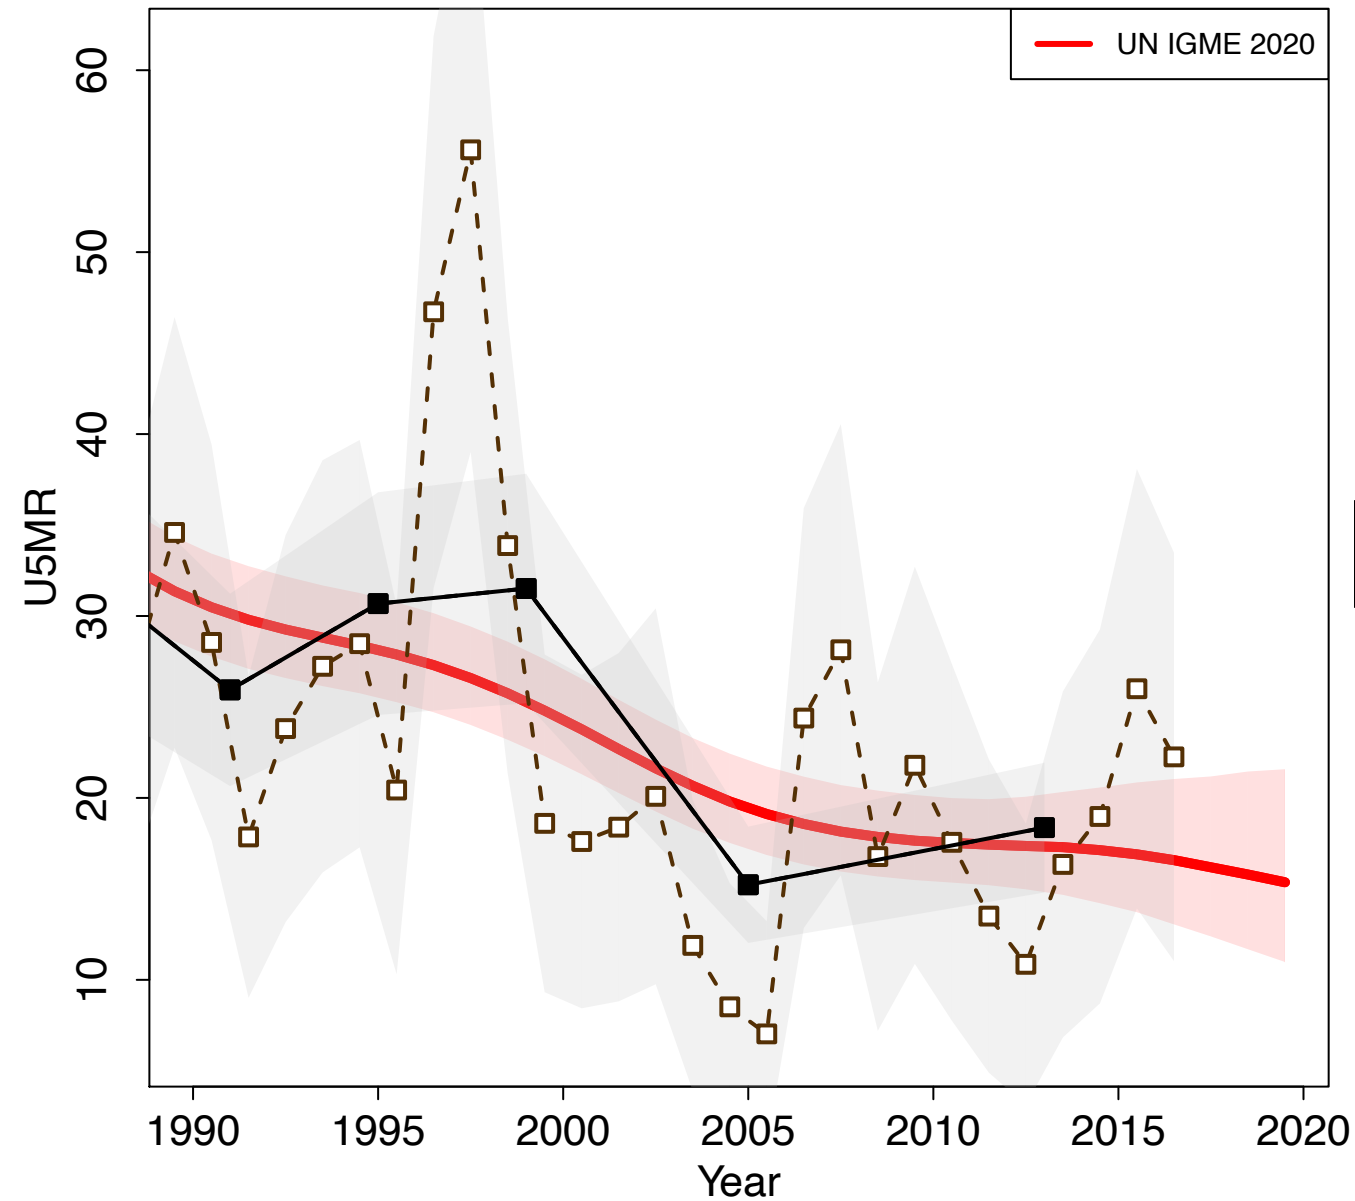

### Saint Lucia

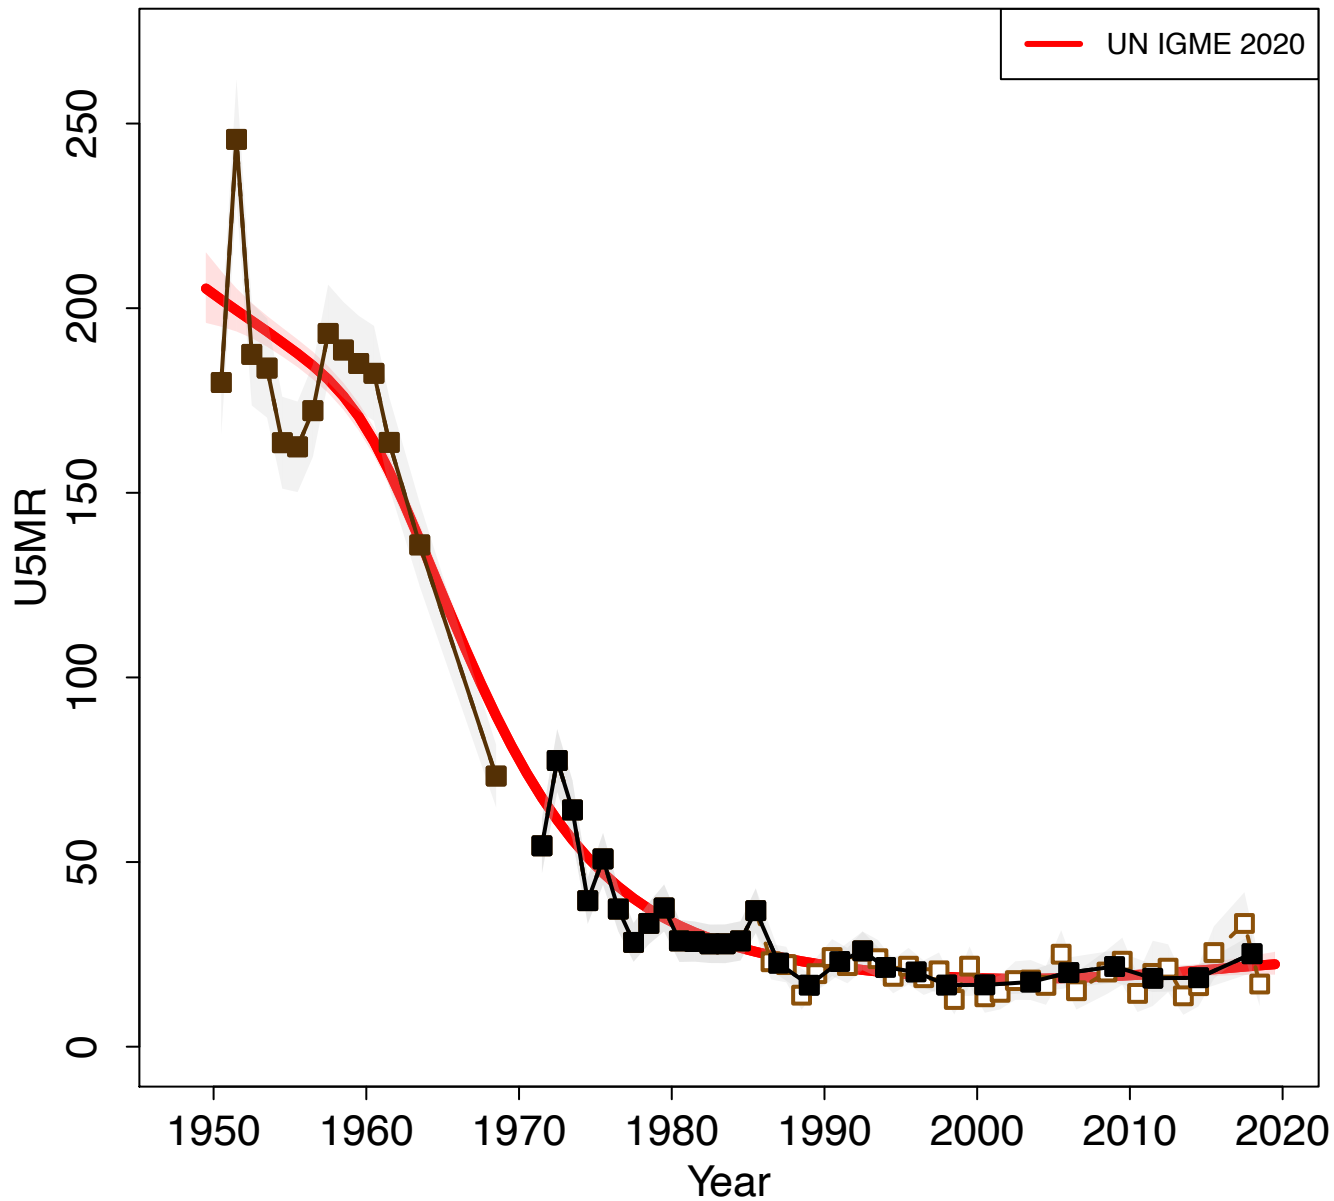

### Zoomed in

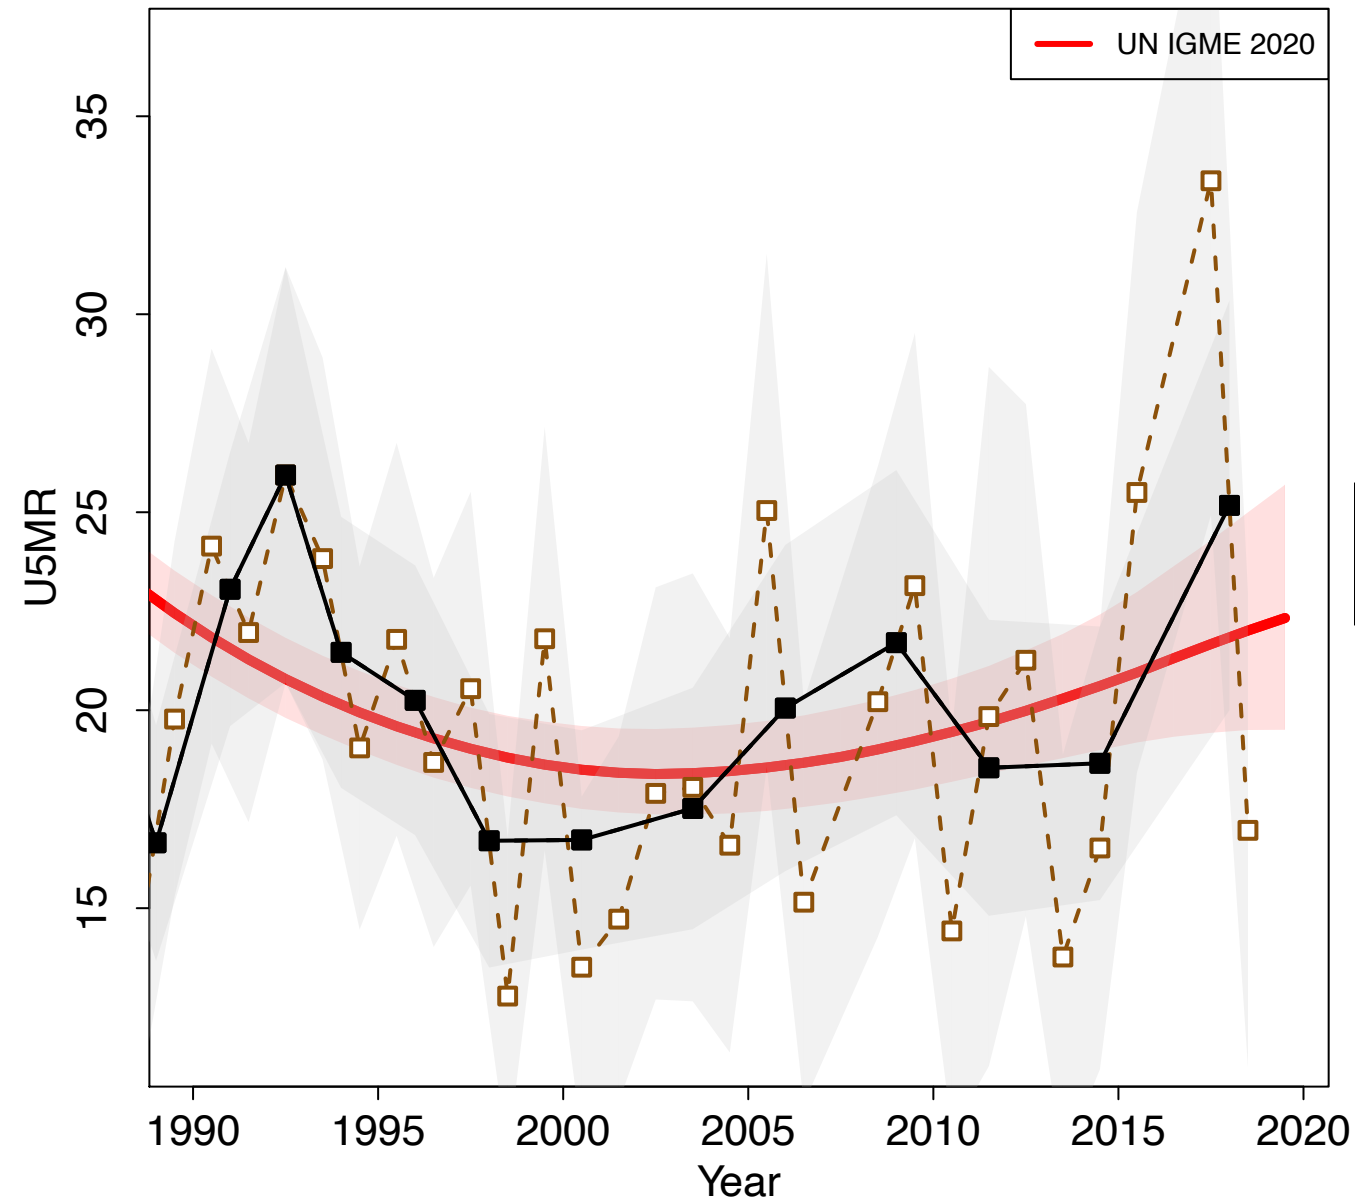

### Samoa

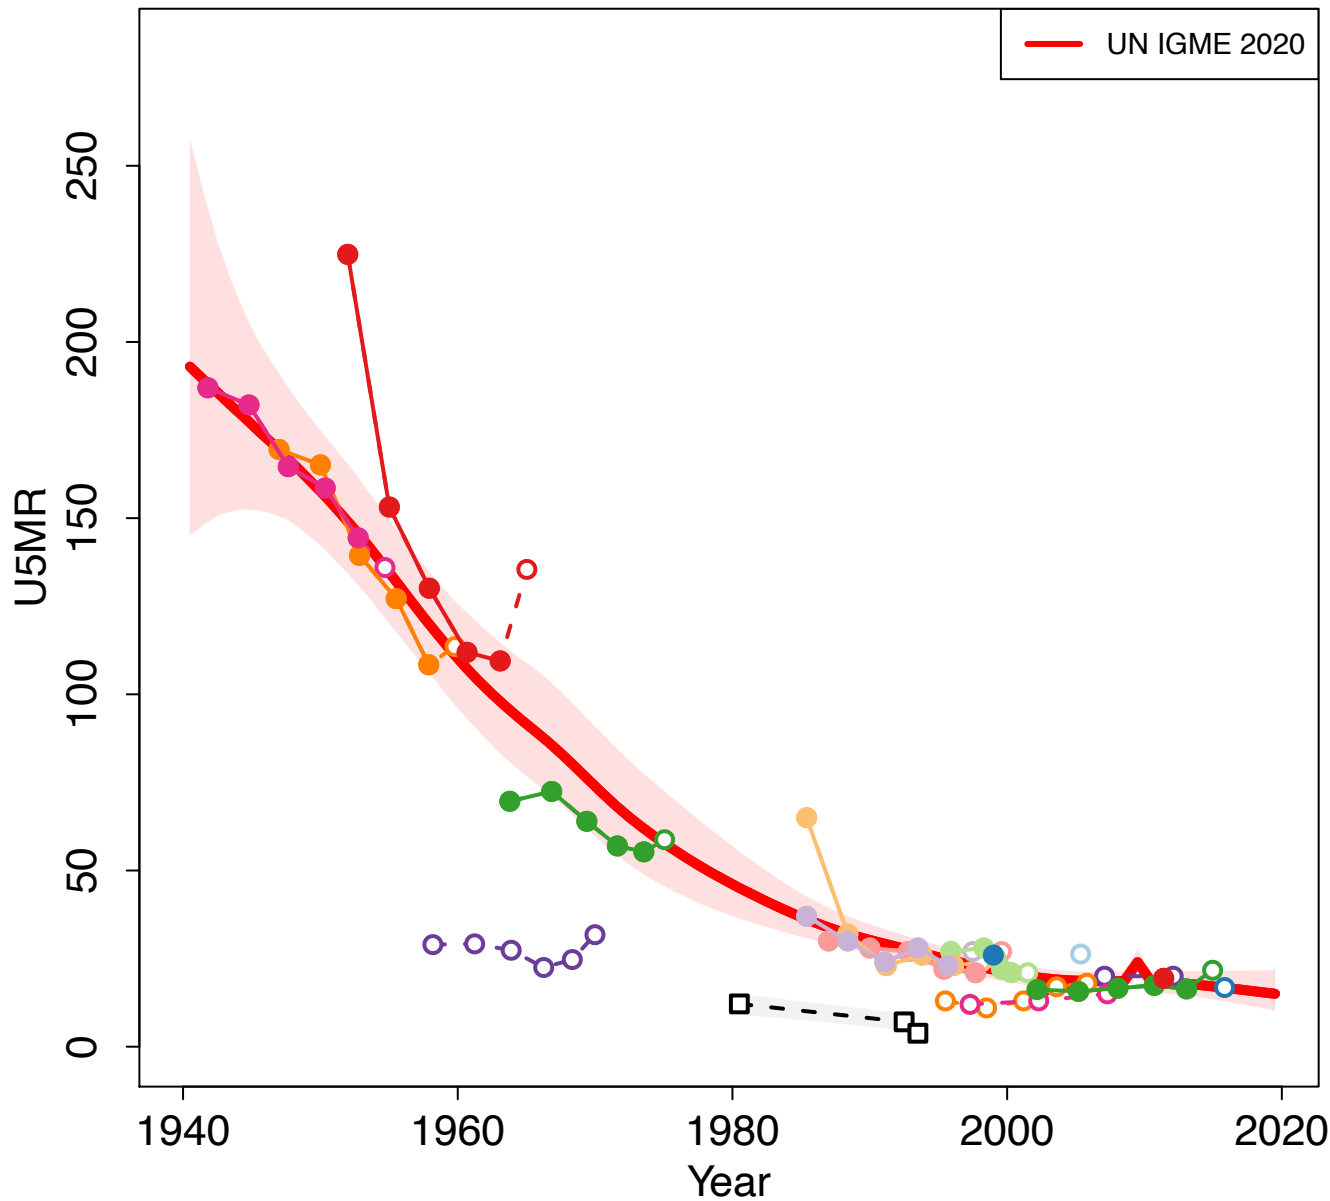

### Zoomed in

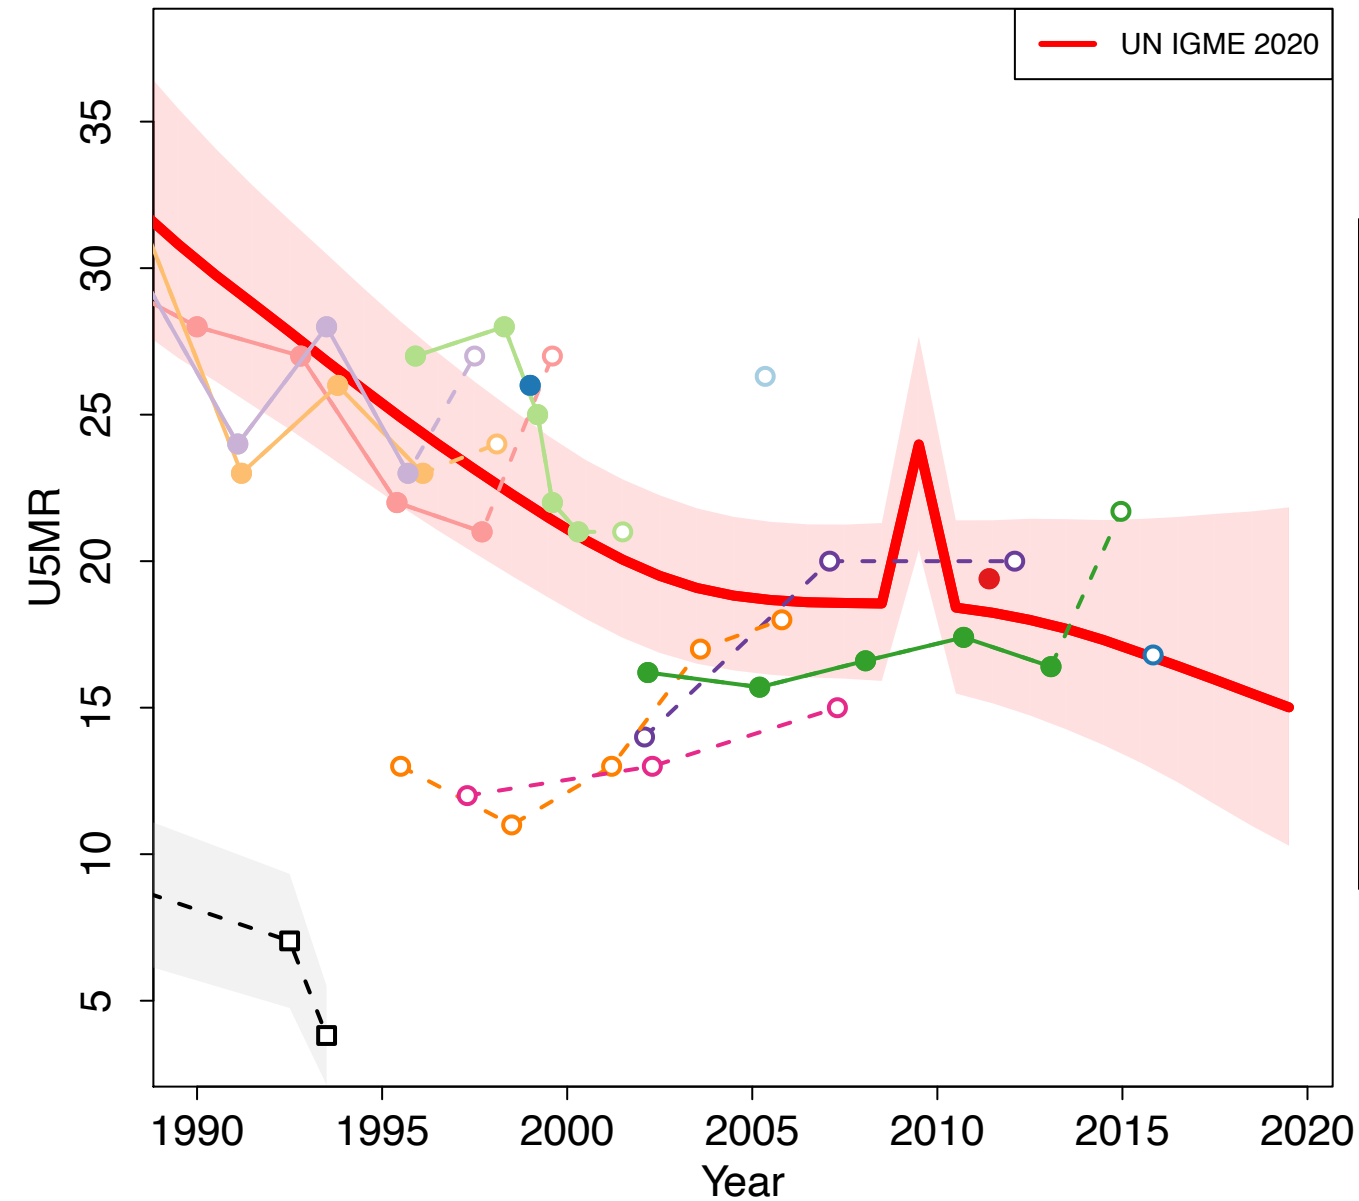

- Census 1956 (Census Indirect)
- Census 1961 (Census Indirect)
- Census 1966 (Census Indirect)
- Census 1971 (Census Indirect)
- Census 1976 (Census Indirect)
- Demographic and Health Survey 1999 (Others Household Deaths)
- Demographic and Health Survey 1999 (Other DHS Indirect)
- Demographic and Vital Statistics Survey 2000 (Others Indirect)
- Population and Housing Census 2001 (Census Indirect)
- Population and Housing Census 2006 (Census Indirect)
- Population and Housing Census 2006 (Others Household Deaths)
- Demographic and Health Survey 2009 (DHS Direct)
- Demographic and Health Survey 2009 (DHS Indirect)
- Population and Housing Census 2011 (Others Household Deaths)
- Demographic and Health Survey 2014 (Other DHS Direct)
- Population and Housing Census 2016 (Census Indirect)
- Population and Housing Census 2016 (Others Household Deaths)
- VR WHO

### San Marino

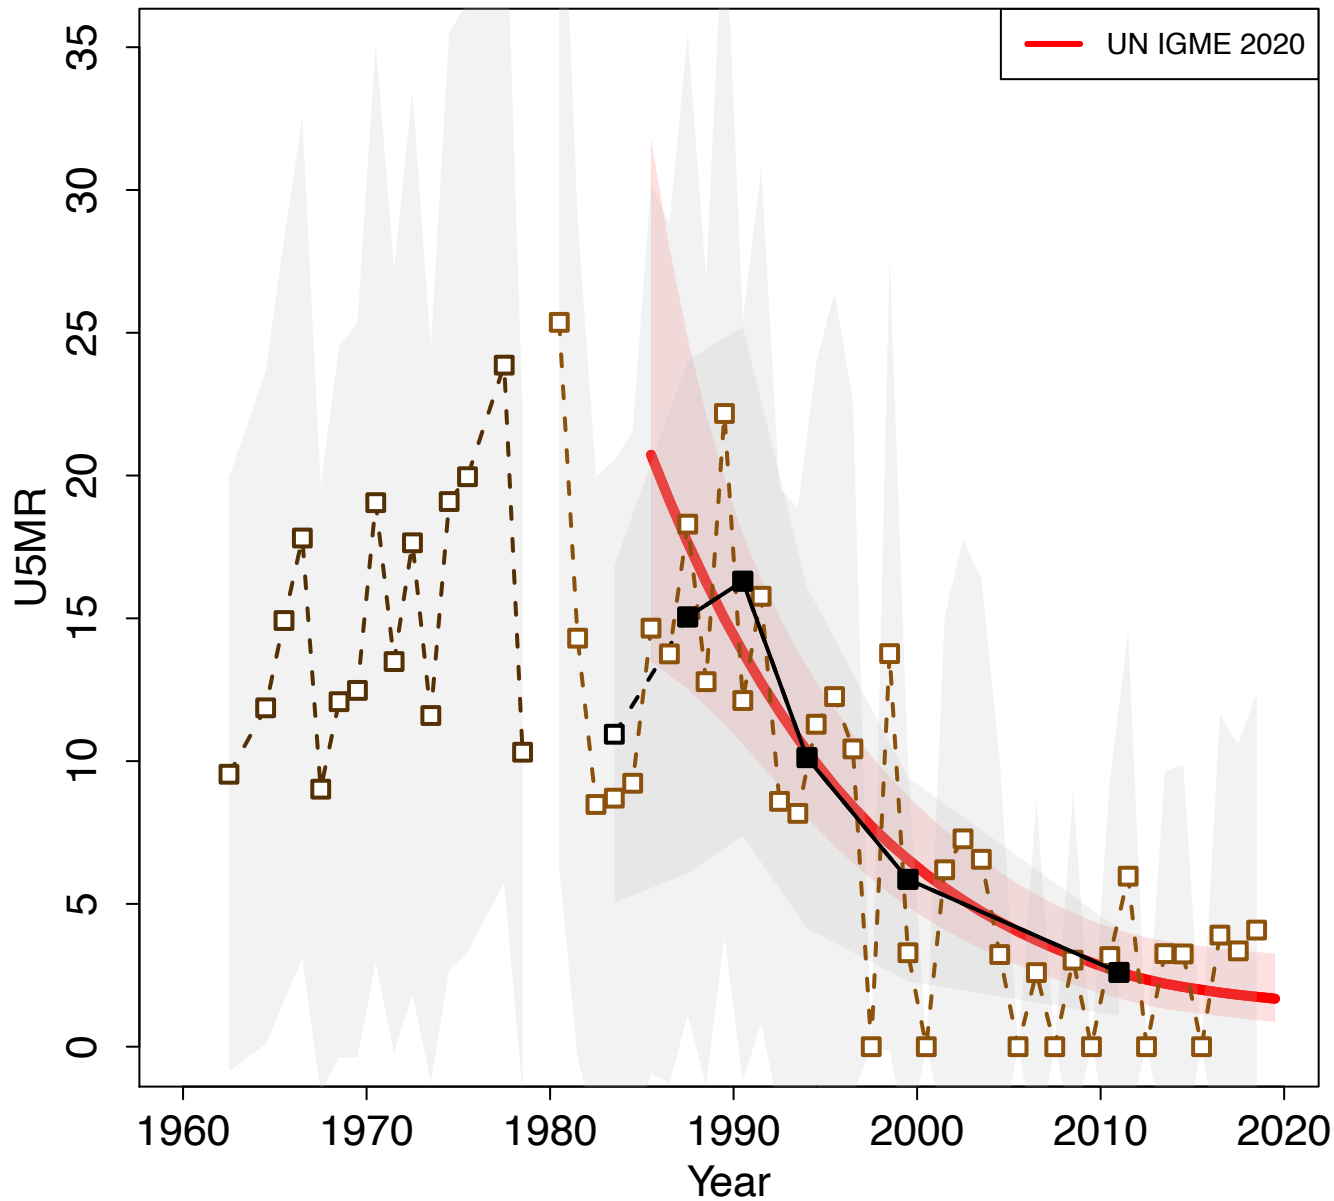

### Zoomed in

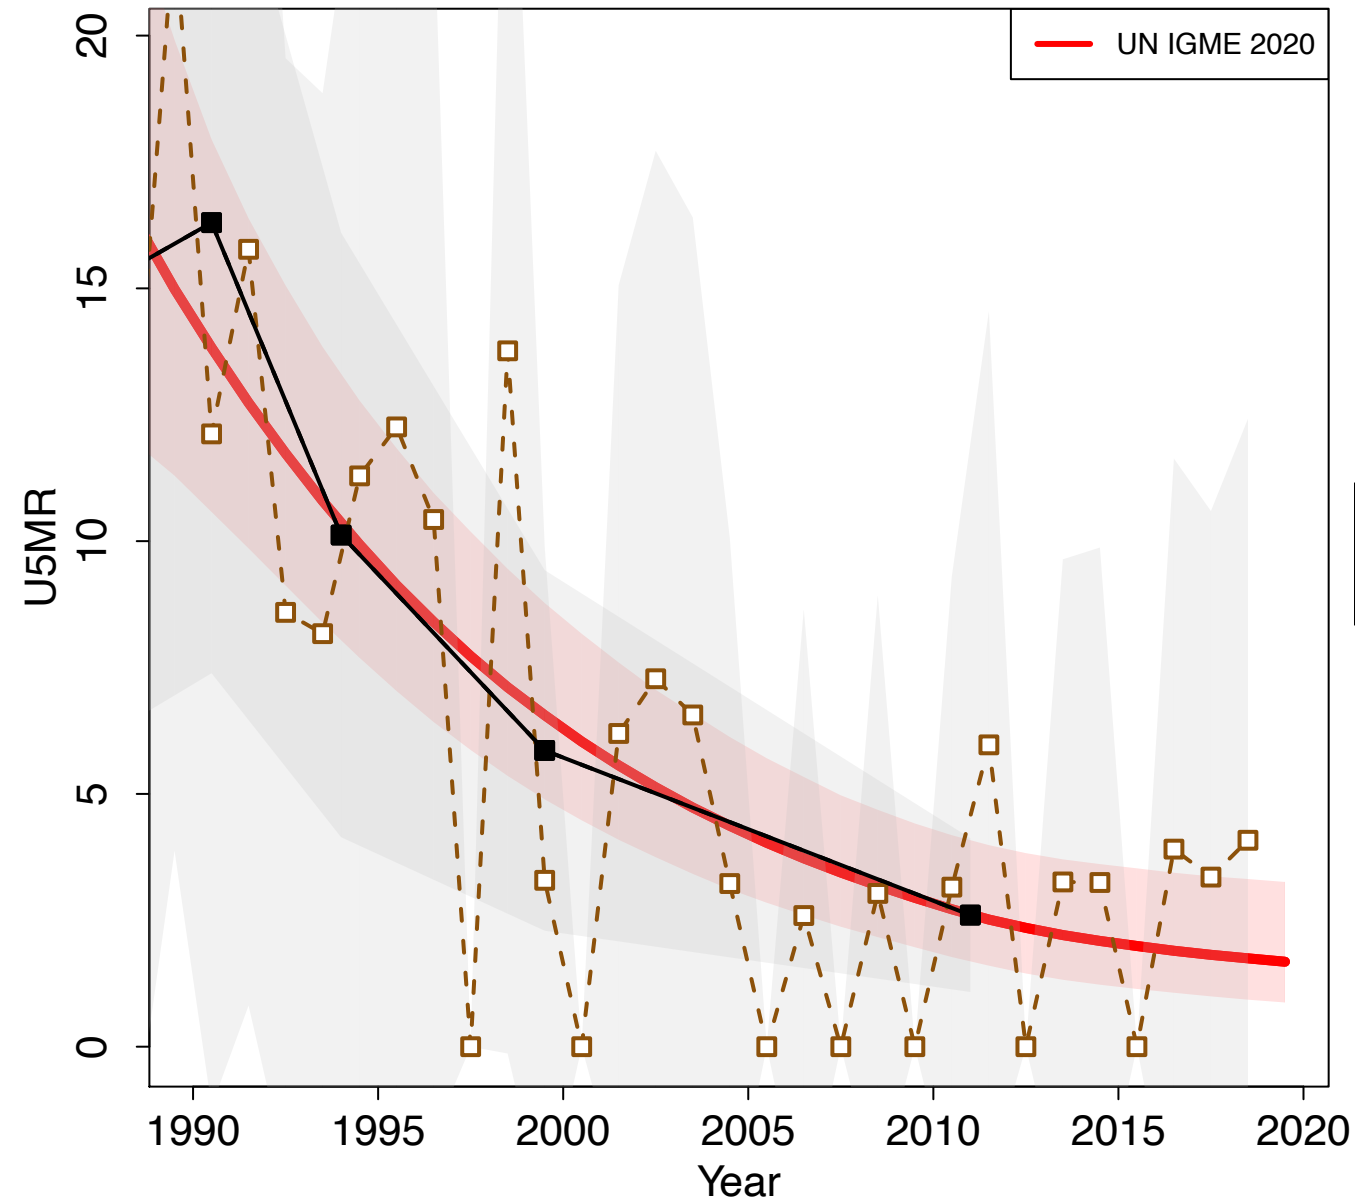

### Sao Tome and Principe

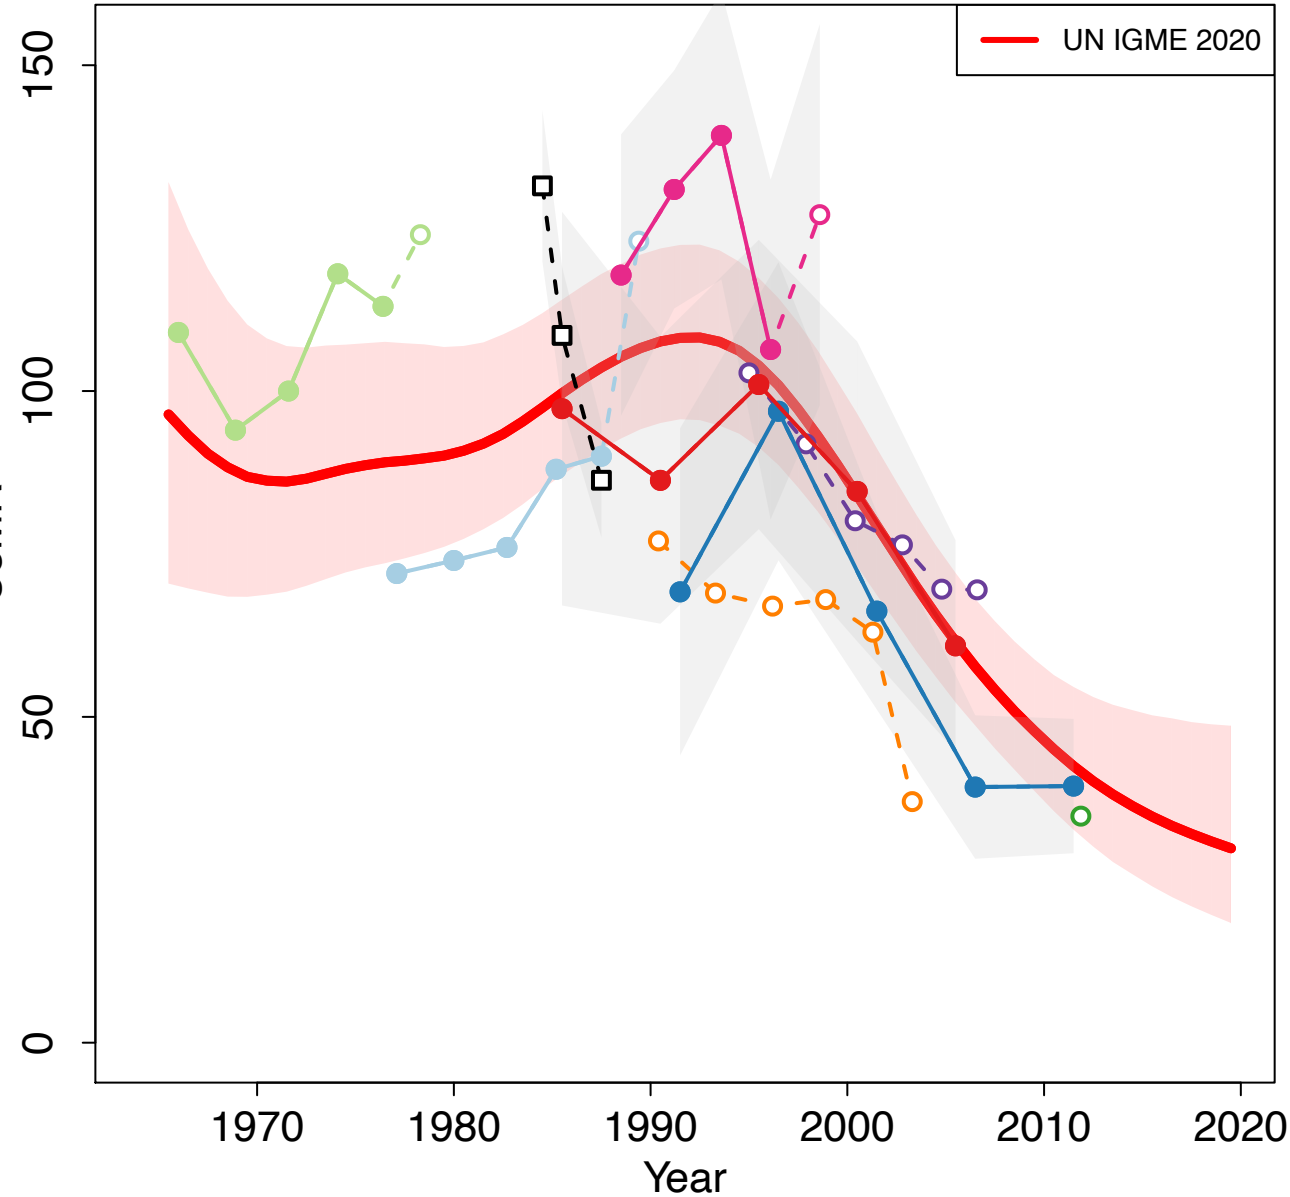

### Zoomed in

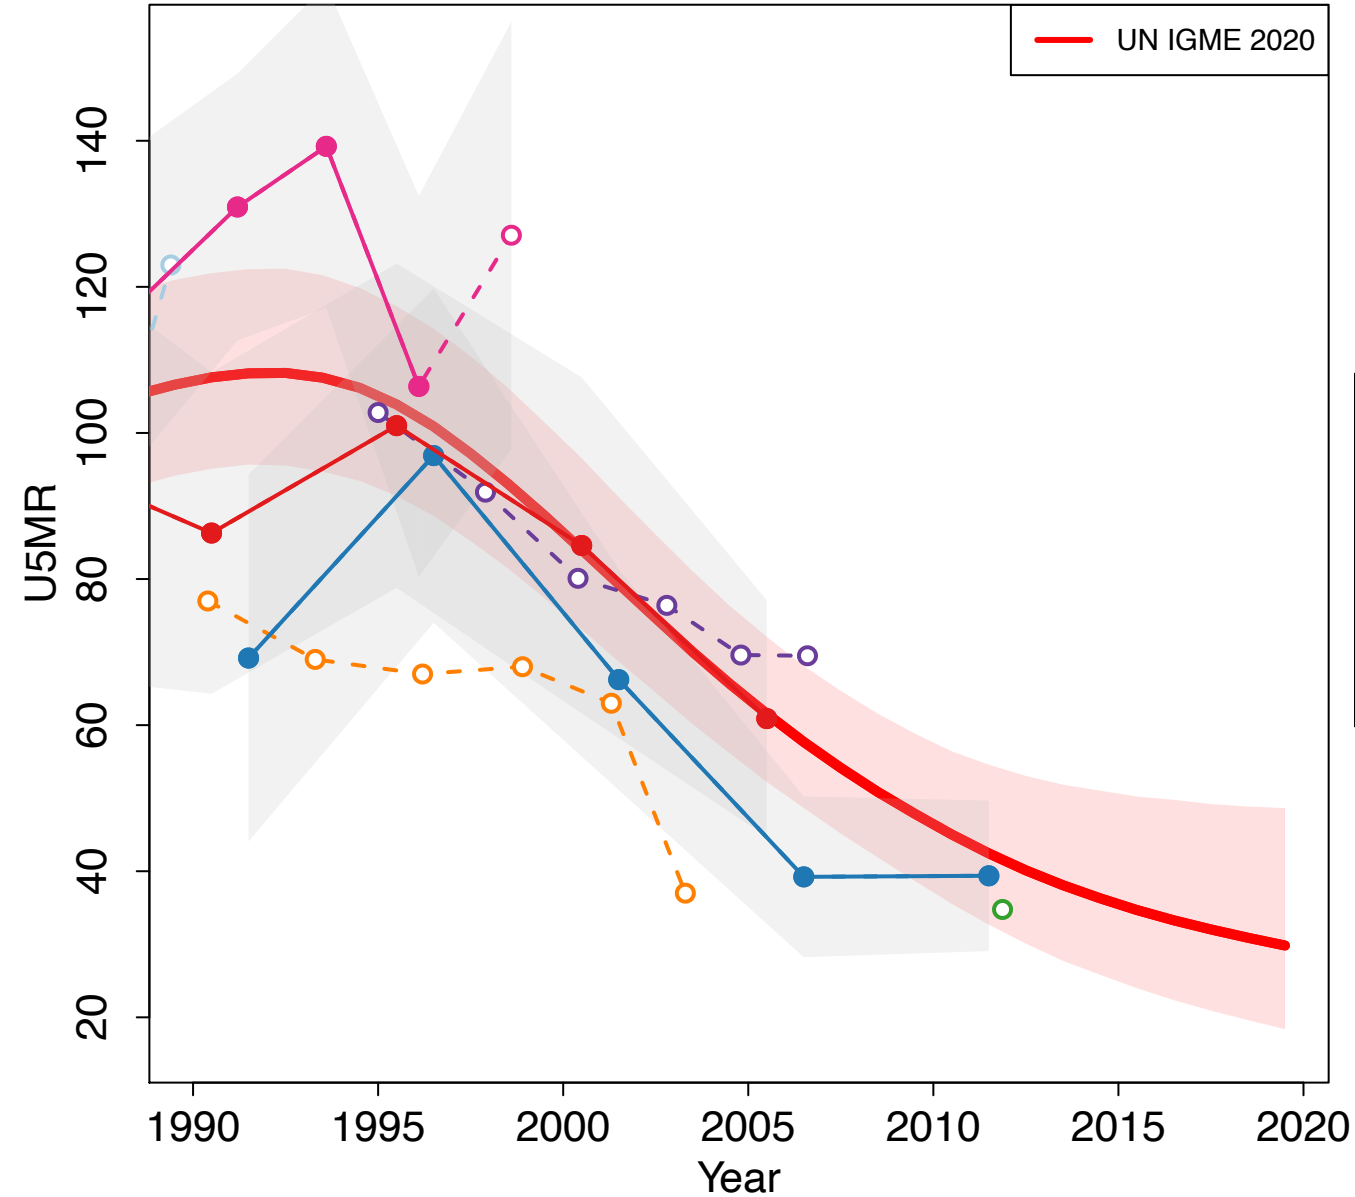

- Census 1980 (Census Indirect)
- Census 1991 (Census Indirect)
- Multiple Indicator Cluster Survey 2000 (MICS Indirect)
- Multiple Indicator Cluster Survey 2006 (Others Indirect)
- Demographic and Health Survey 2008–2009 (DHS Direct)
- Demographic and Health Survey 2008–2009 (DHS Indirect)
- Census 2012 (Others Household Deaths)
- Multiple Indicator Cluster Survey 2014 (MICS Direct)
- VR WHO

### Saudi Arabia

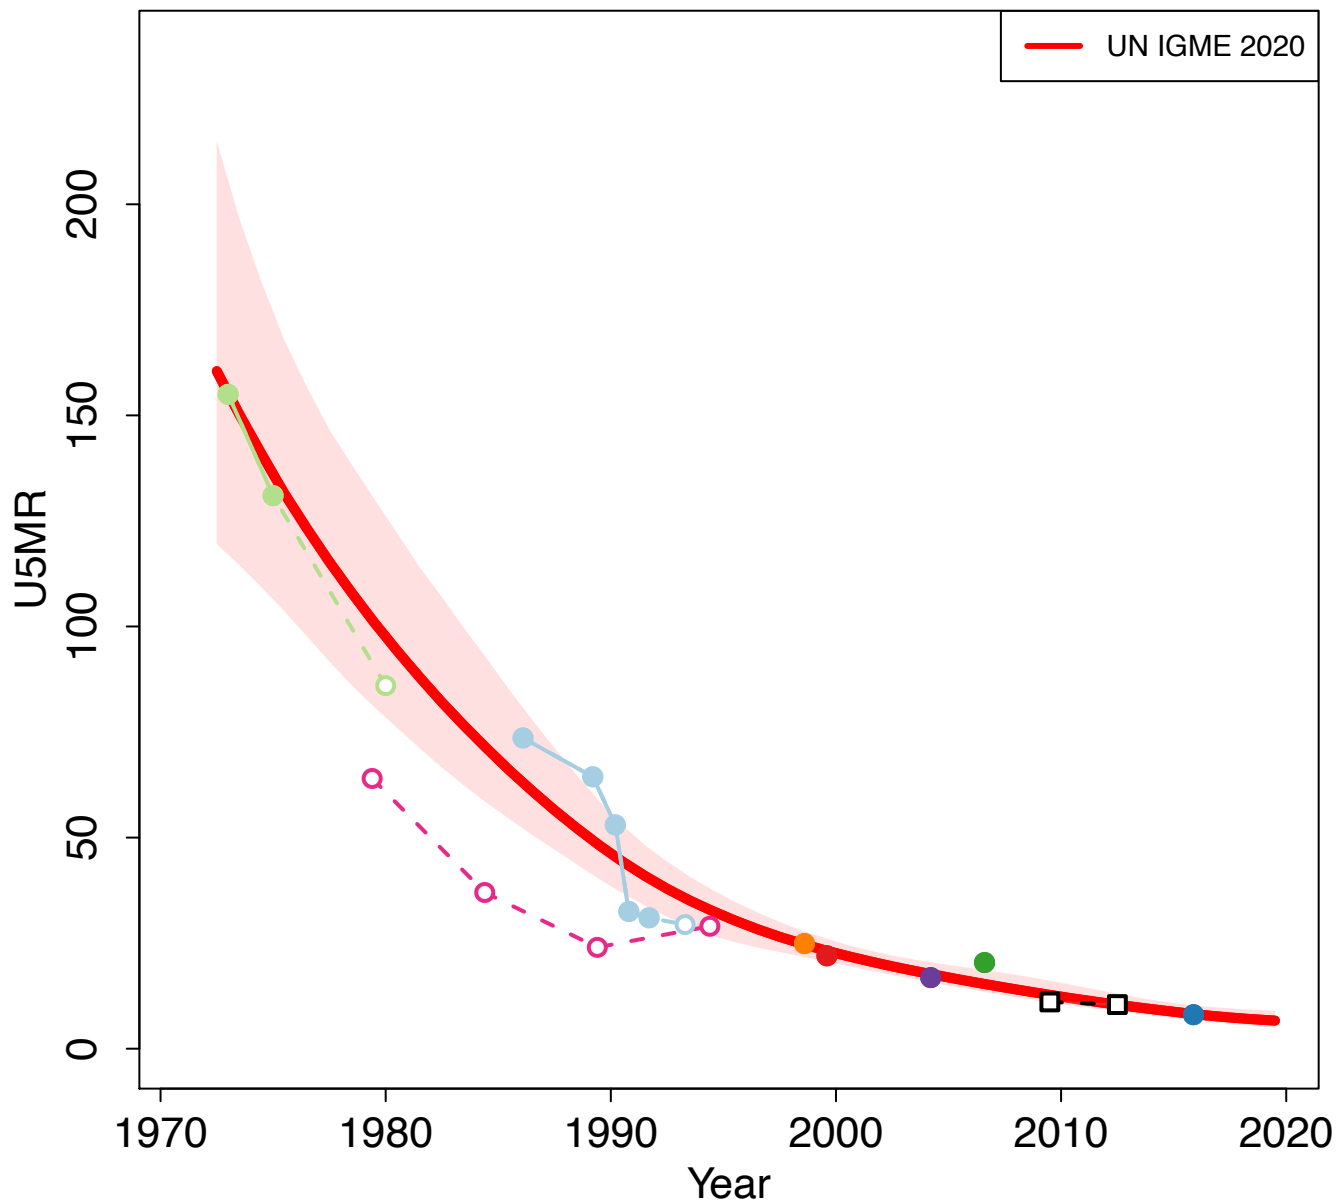

### Zoomed in

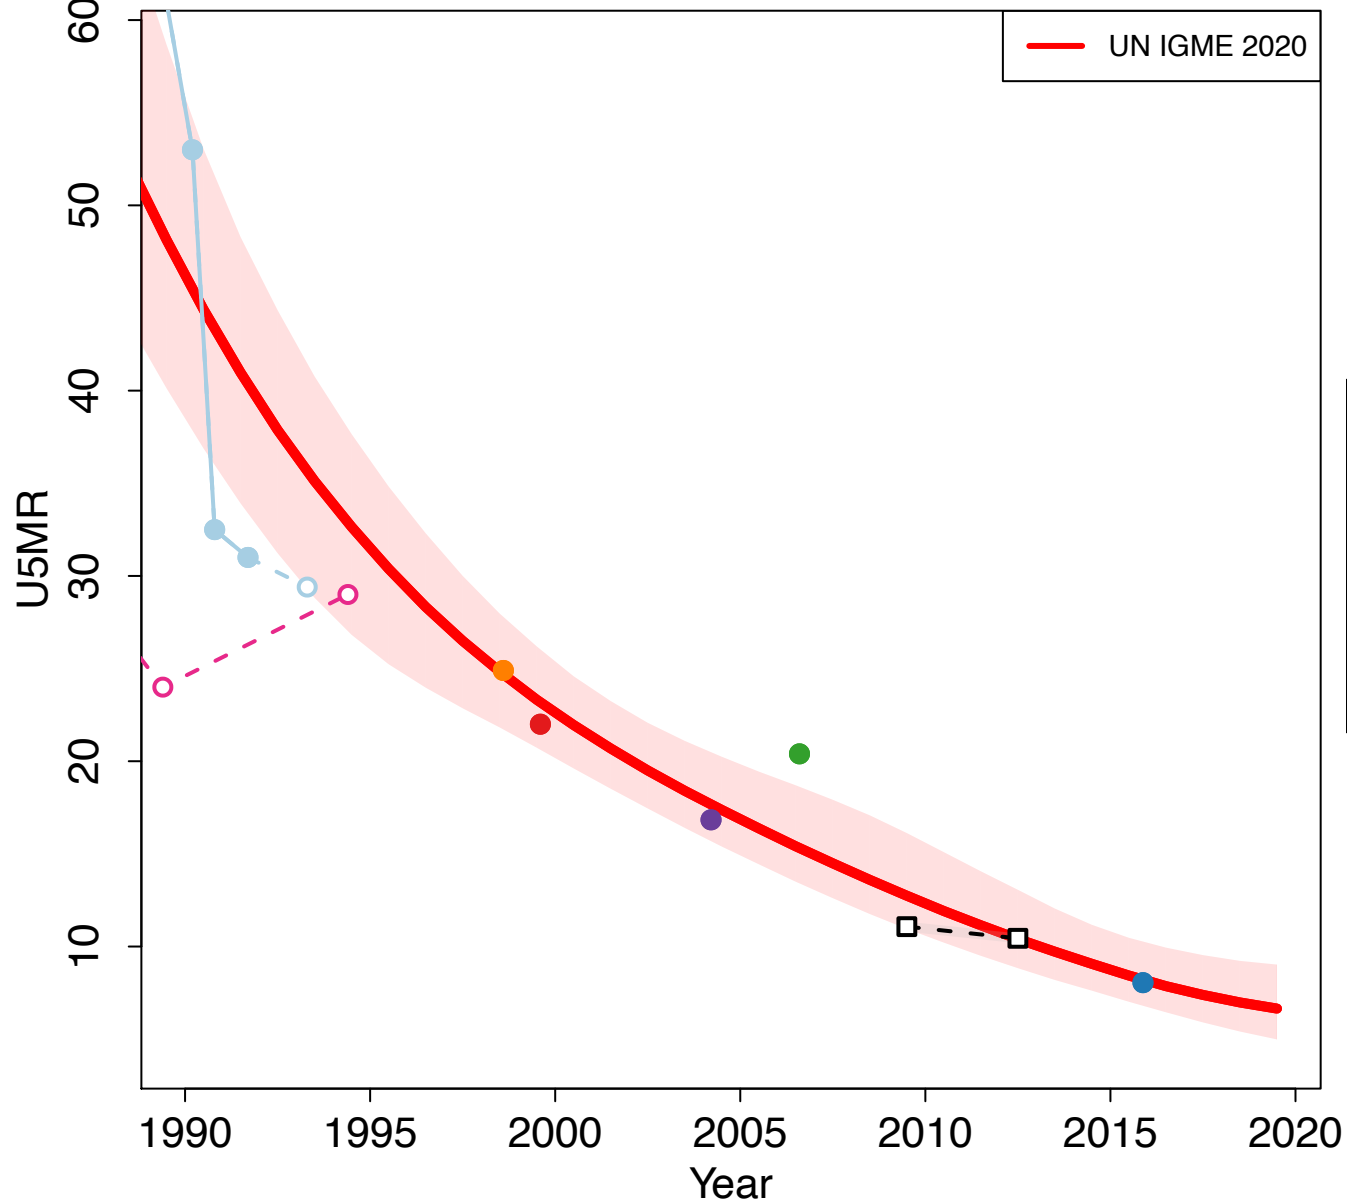

- Child Health Survey 1987 (Others Indirect)
- Family Health Survey 1996 (Others Indirect)
- Gulf Family Health Survey 1996 (Others Direct)
- Demographic Survey 1999 (Others Household Deaths)
- Demographic Survey 2000 (Others Household Deaths)
- Census 2004 (Others Household Deaths)
- Demographic Survey 2007 (Others Household Deaths)
- Demographic Survey 2016 (Others Household Deaths)
- VR WHO



# Senegal

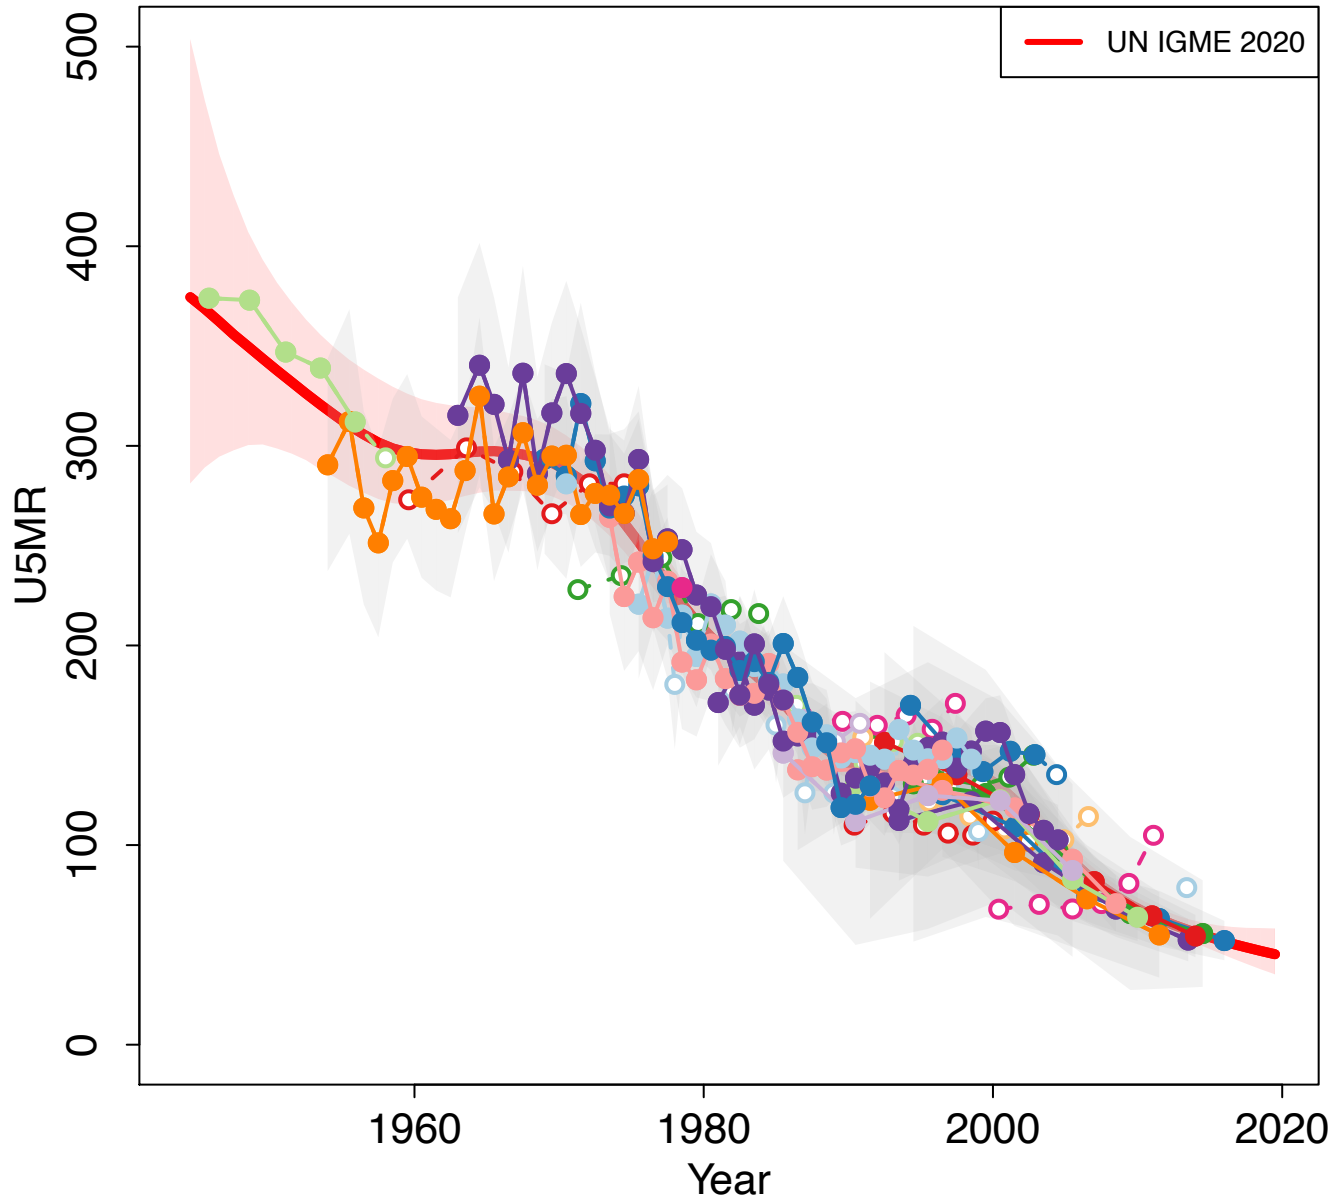

# Zoomed in

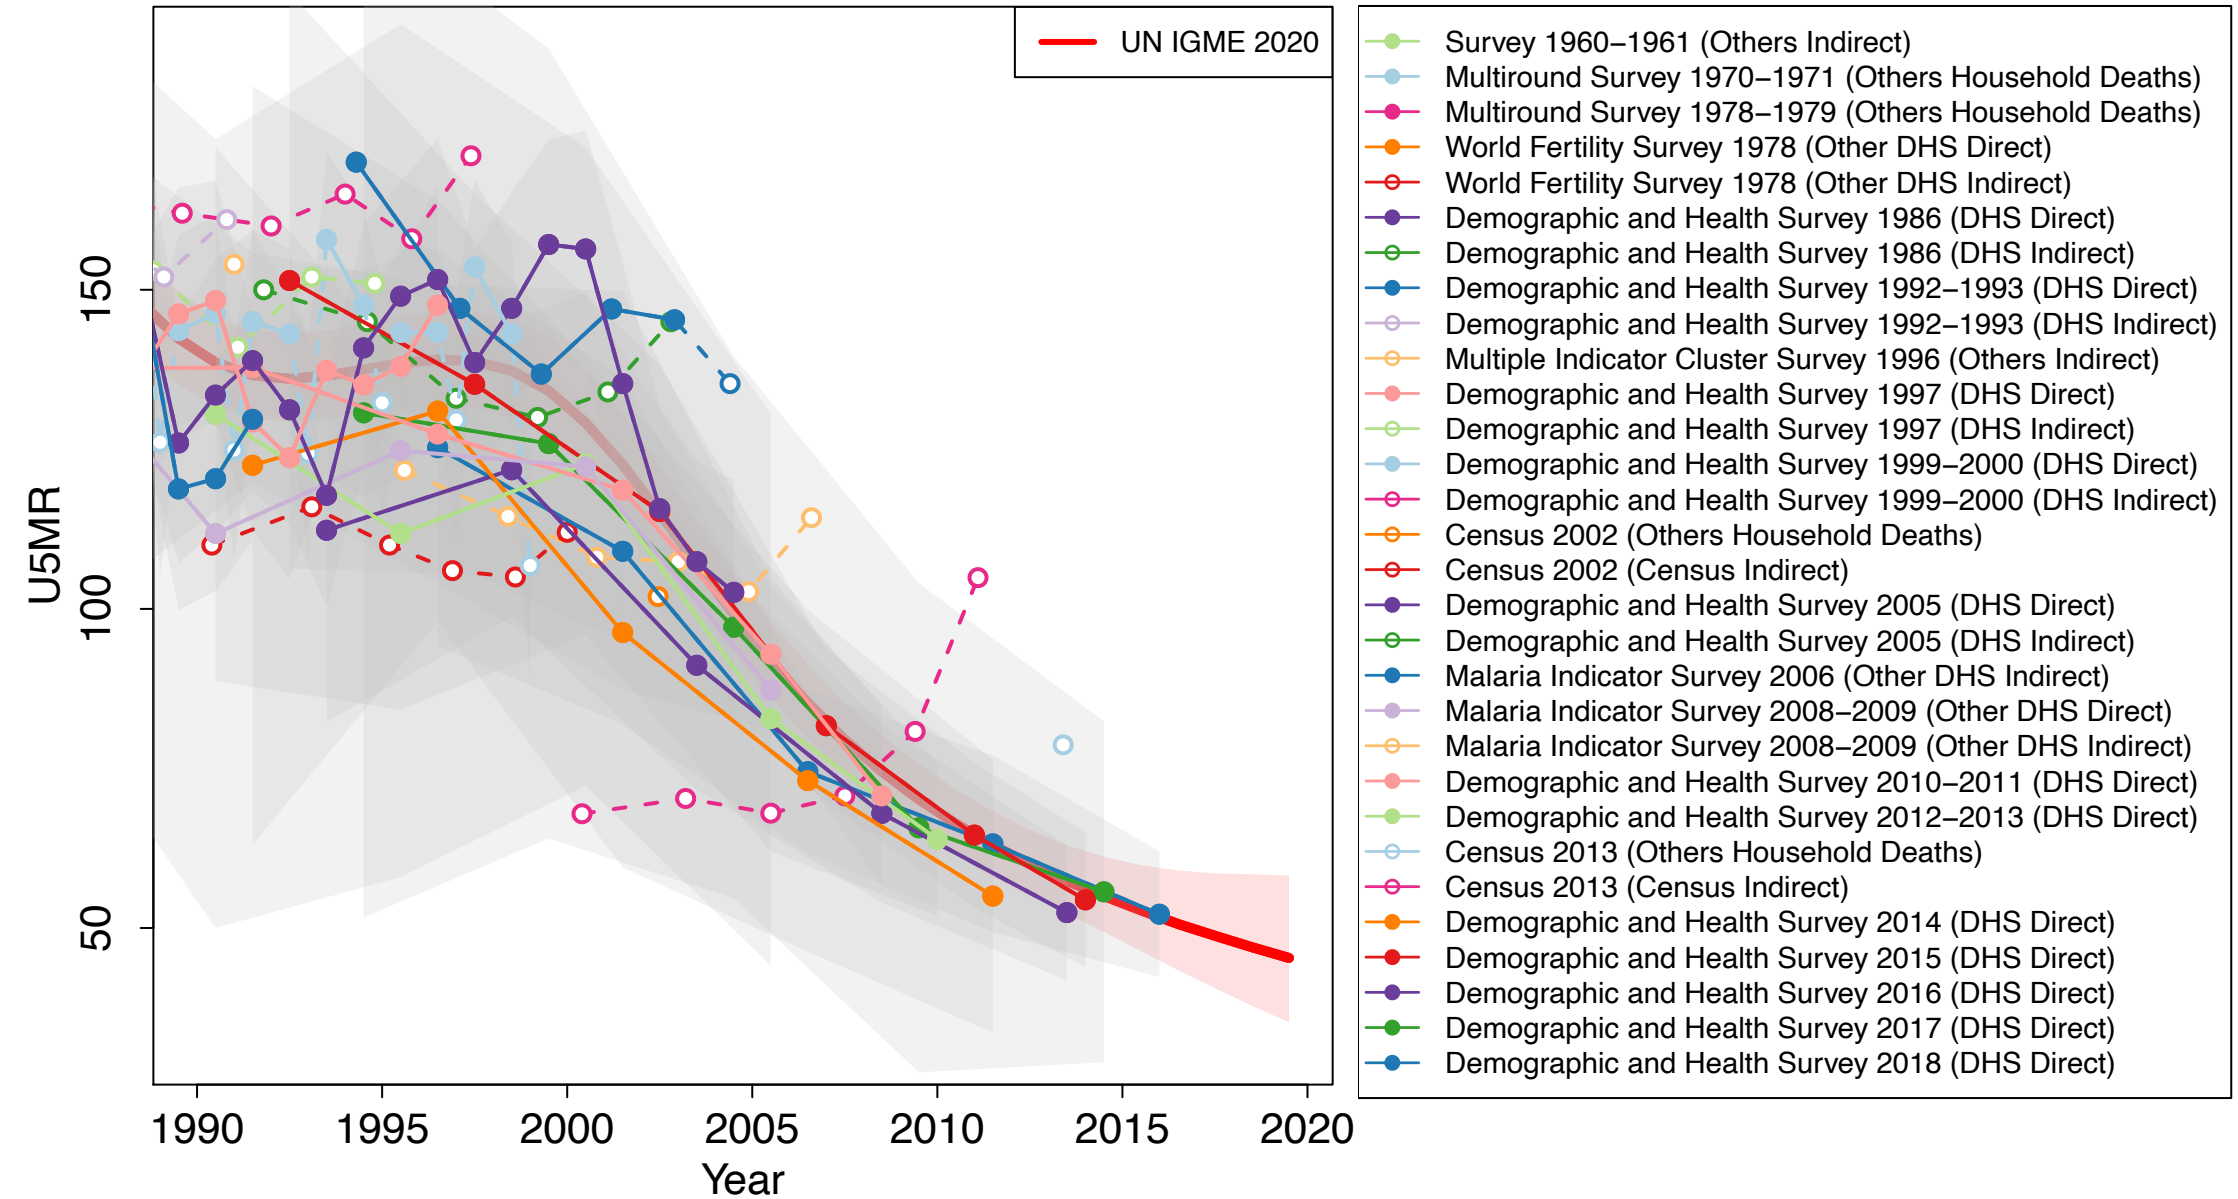



### Serbia

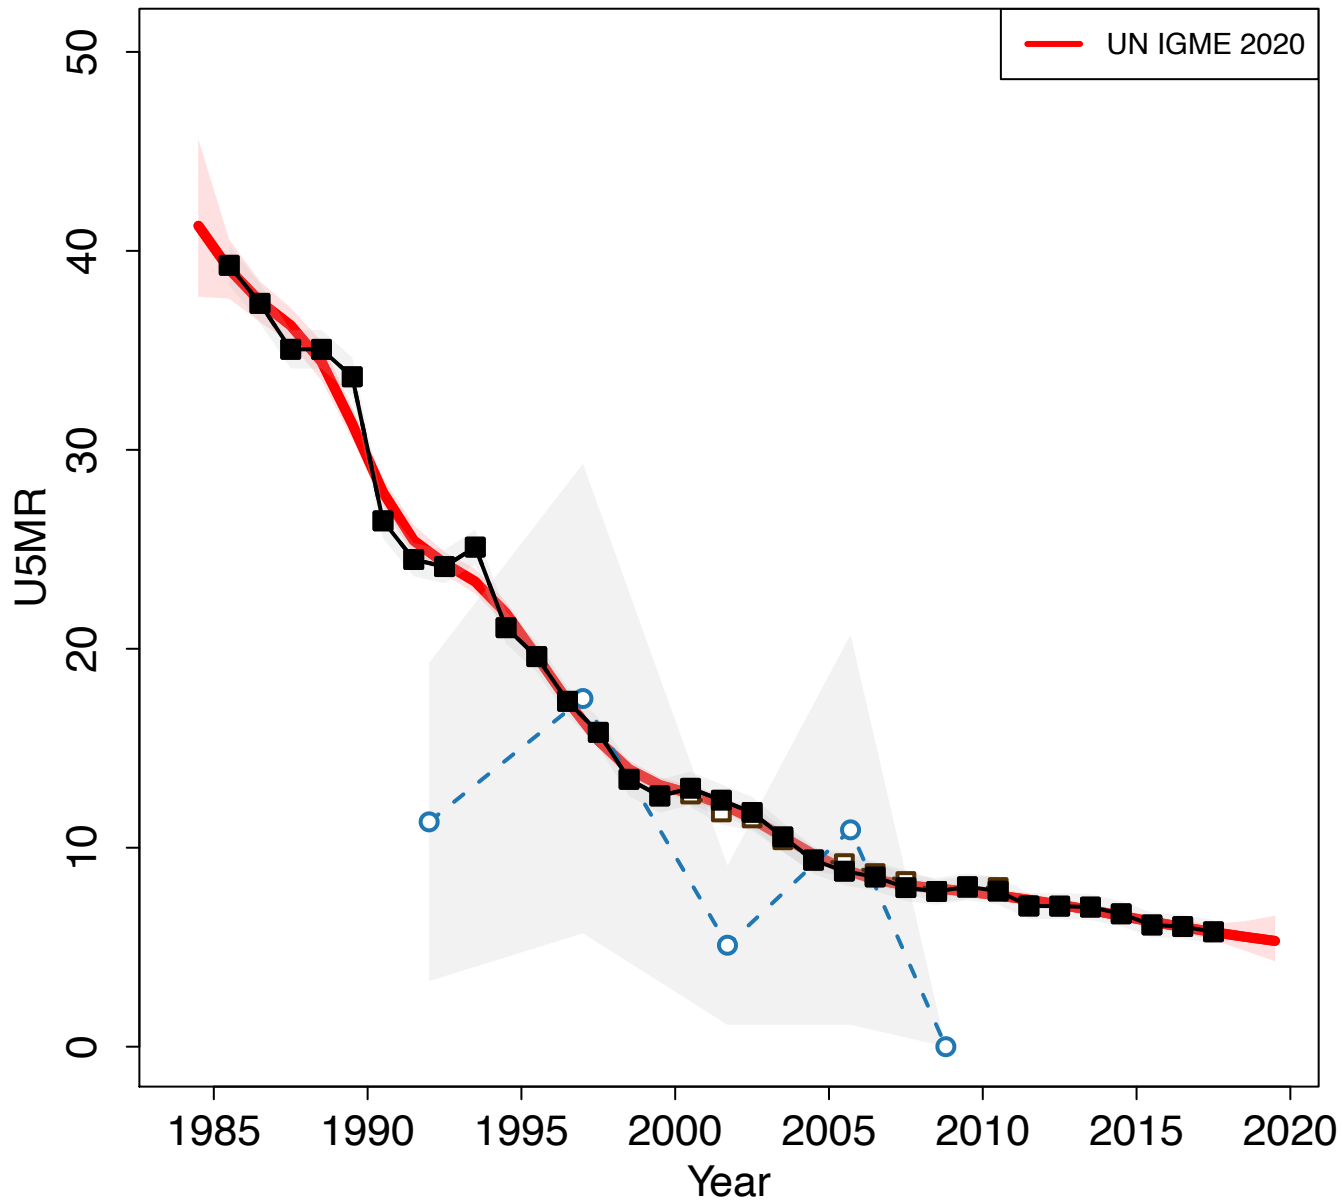

### Zoomed in

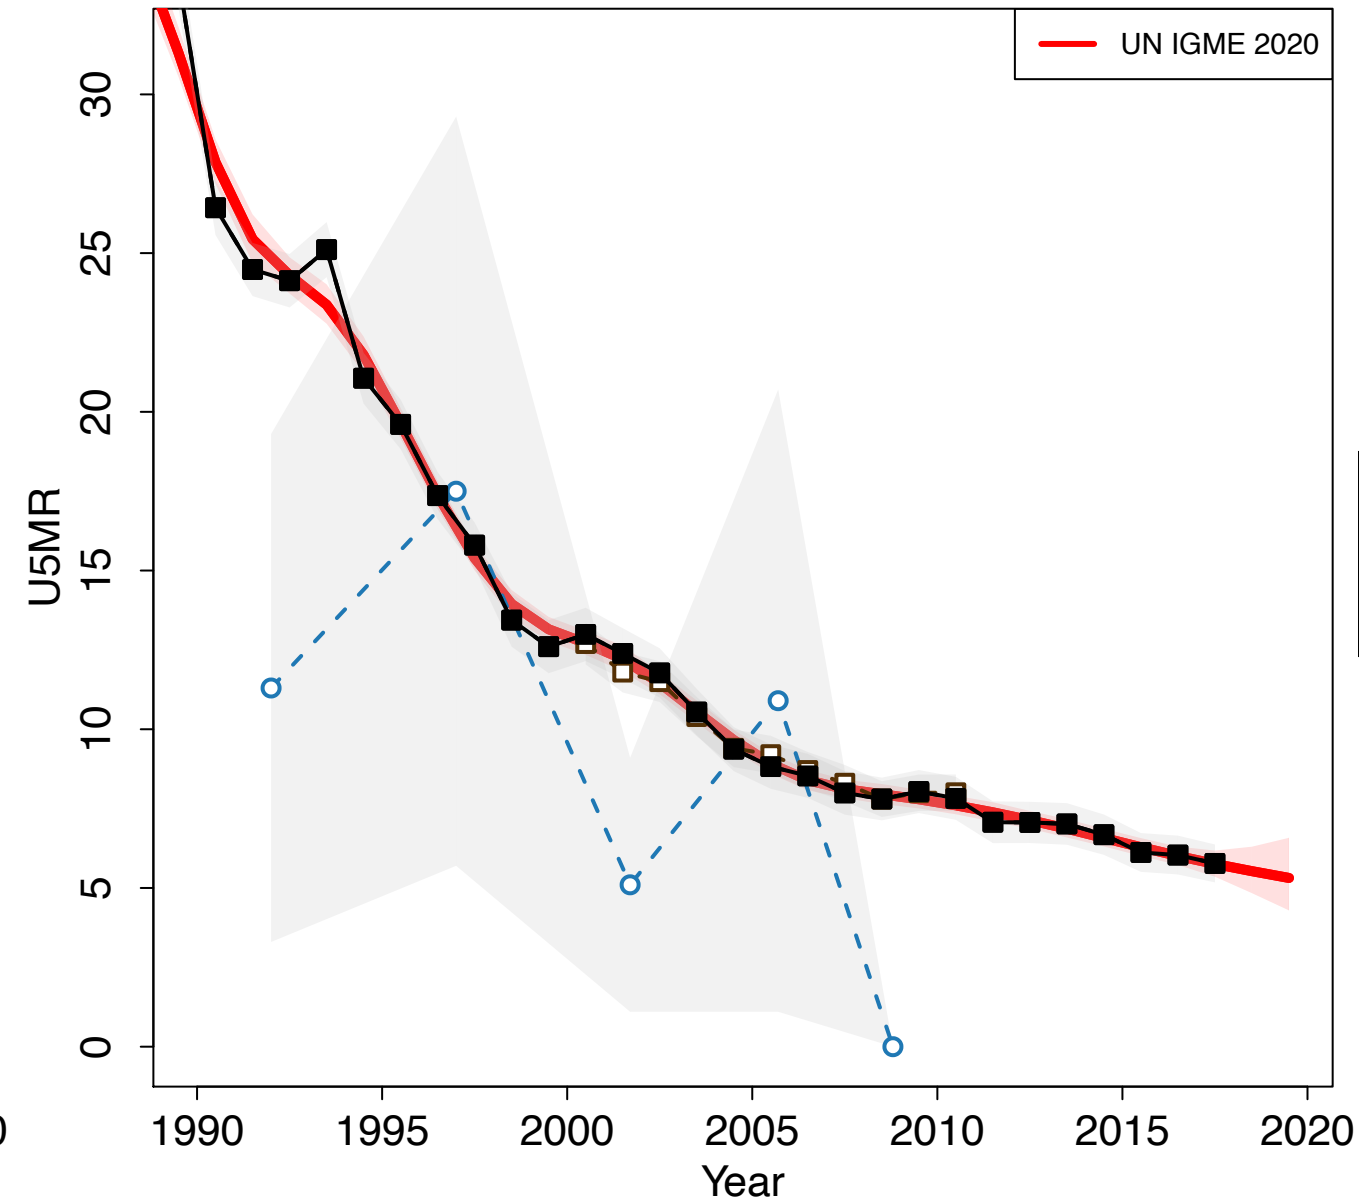

# Seychelles

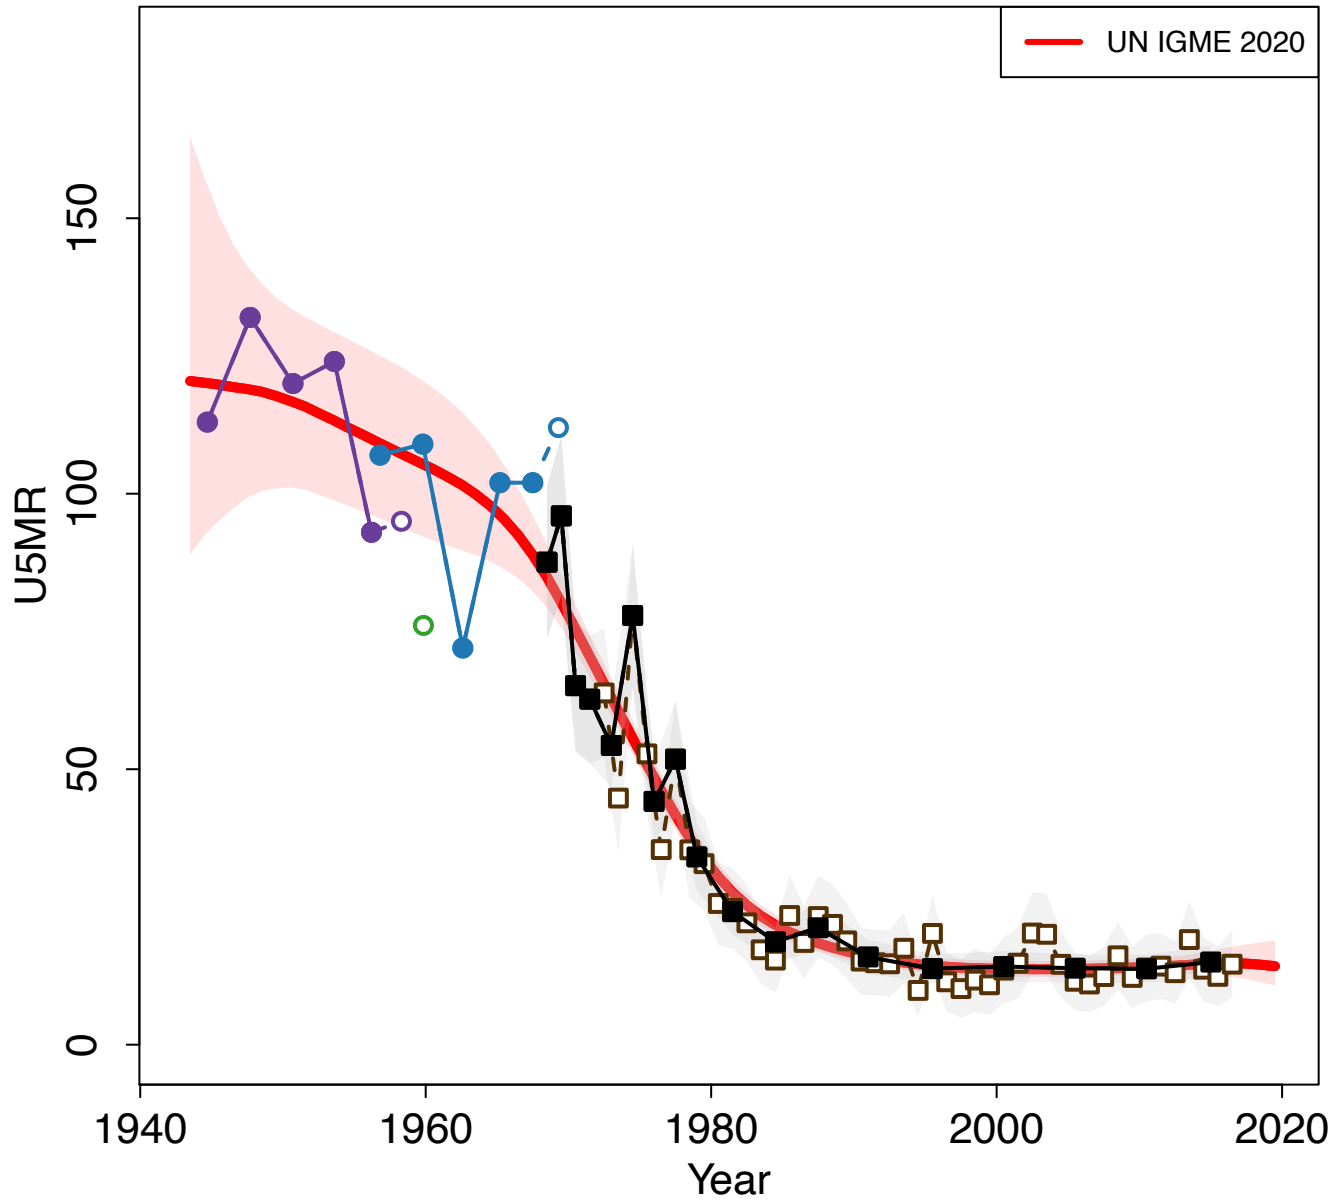

# Zoomed in

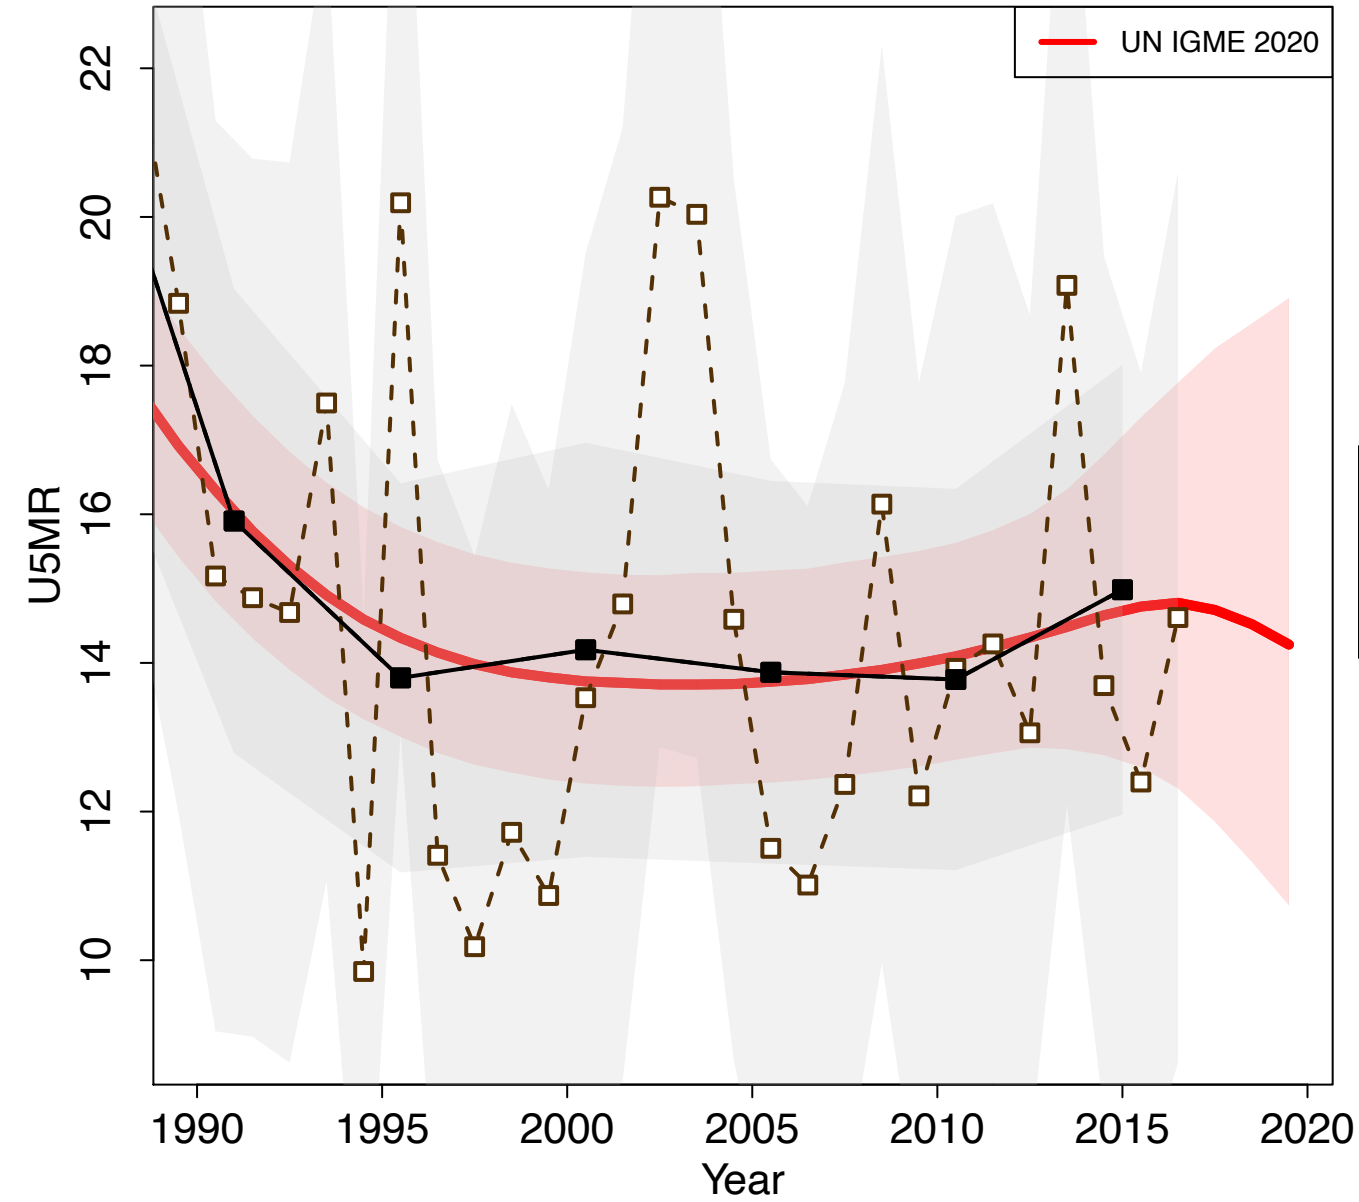

### Sierra Leone

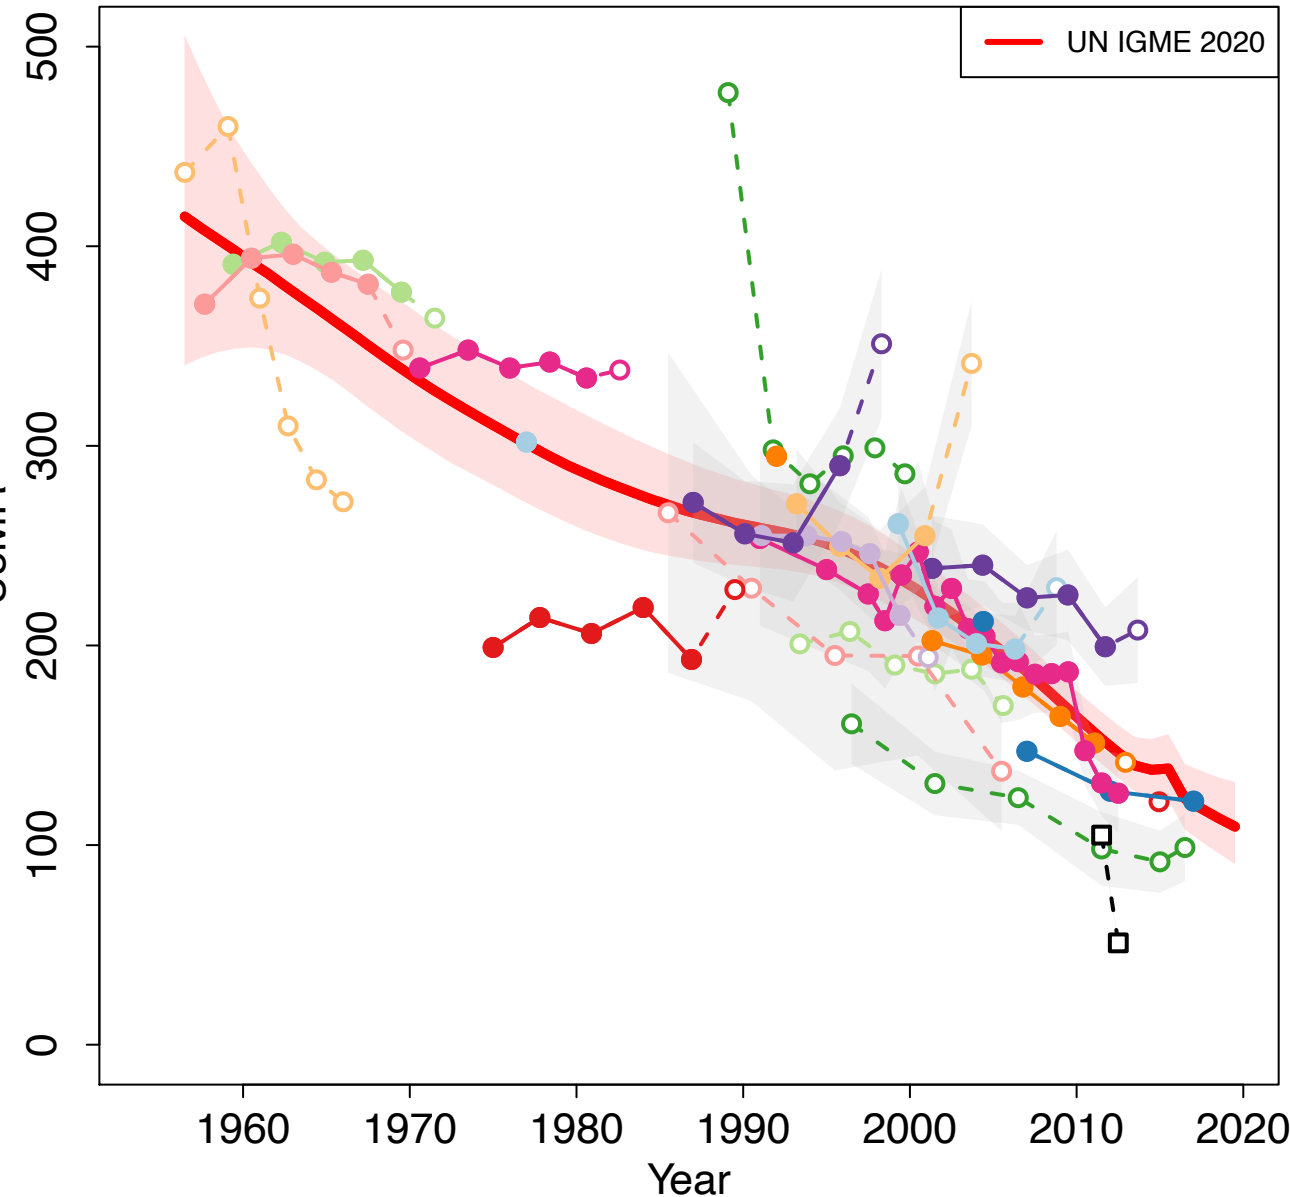

### Zoomed in

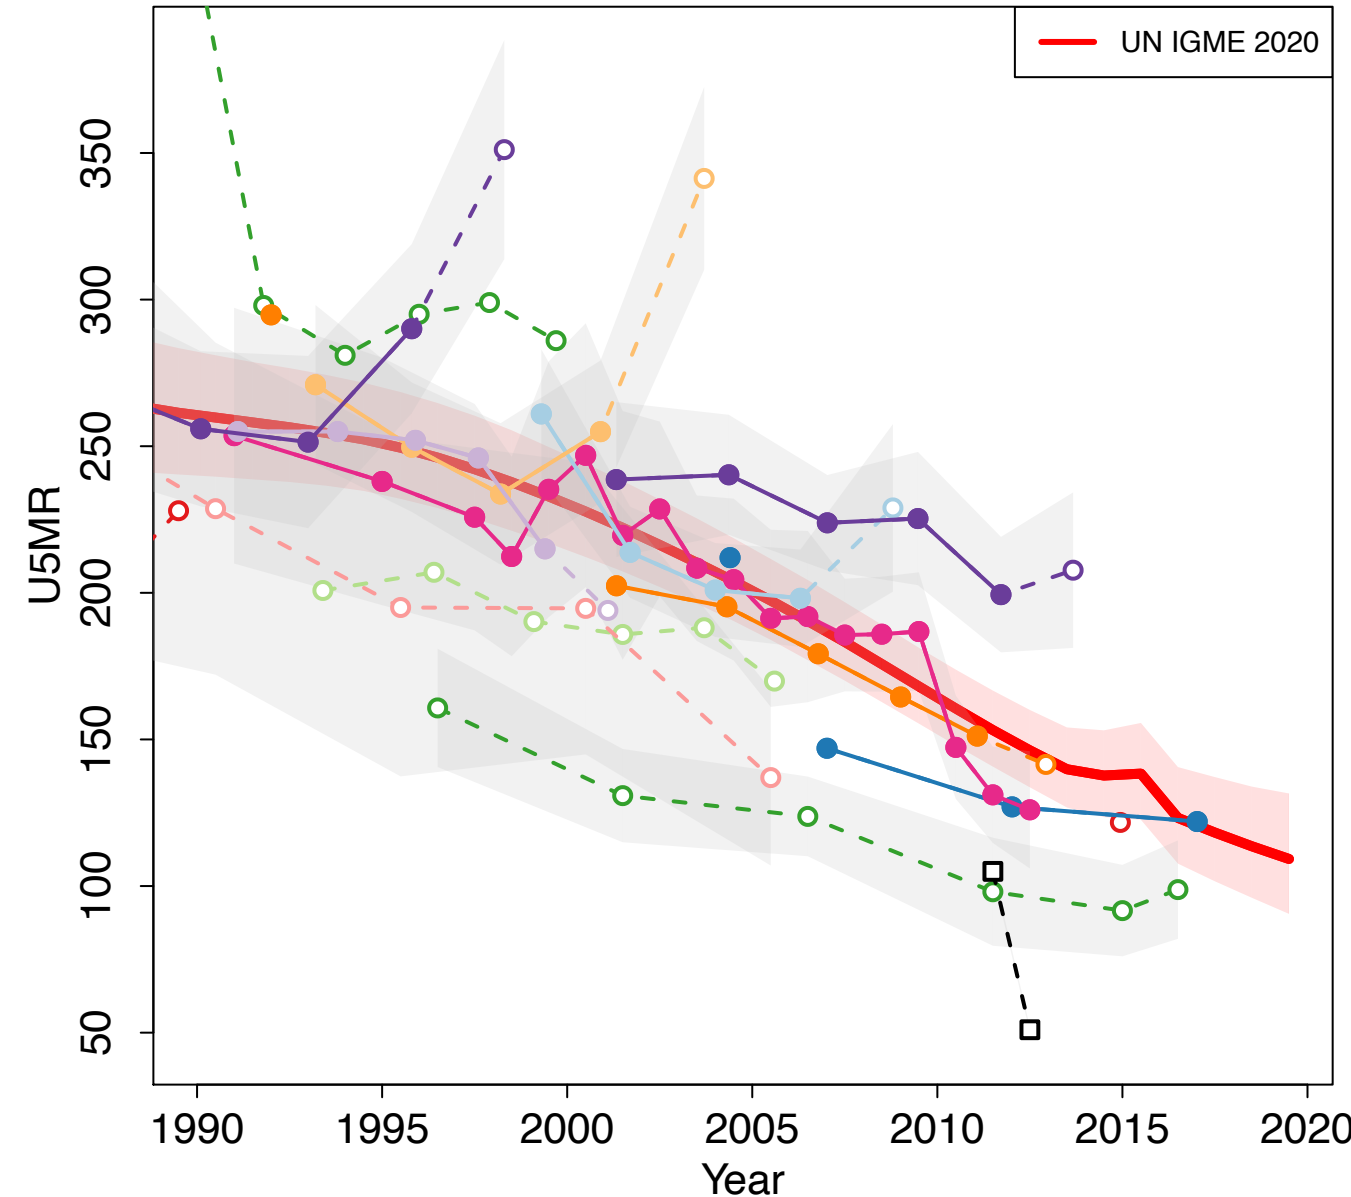

- National Fertility Survey 1969 (Others Indirect)
- Pilot Census 1973 (Census Indirect)
- Census 1974 (Census Indirect)
- National Survey 1977 (Others Household Deaths)
- Census 1985 (Census Indirect)
- DSMS 1992 (Others Household Deaths)
- DSMS 1992 (Others Indirect)
- Multiple Indicator Cluster Survey 2000 (MICS Indirect)
- Pilot Census 2003 (Census Indirect)
- Census 2004 (Others Household Deaths)
- Census 2004 (Census Indirect)
- Multiple Indicator Cluster Survey 2005–2006 (MICS Indirect)
- Demographic and Health Survey 2008 (DHS Direct)
- Demographic and Health Survey 2008 (DHS Indirect)
- Multiple Indicator Cluster Survey 2010 (MICS Indirect)
- Demographic and Health Survey 2013 (DHS Direct)
- Census 2015 (Census Indirect)
- Census 2015 (Others Household Deaths)
- Malaria Indicator Survey 2016 (Other DHS Indirect)
- Multiple Indicator Cluster Survey 2017 (MICS Direct)
- Demographic and Health Survey 2019 (DHS Direct)
- VR VR from Health Management Information System

### Singapore

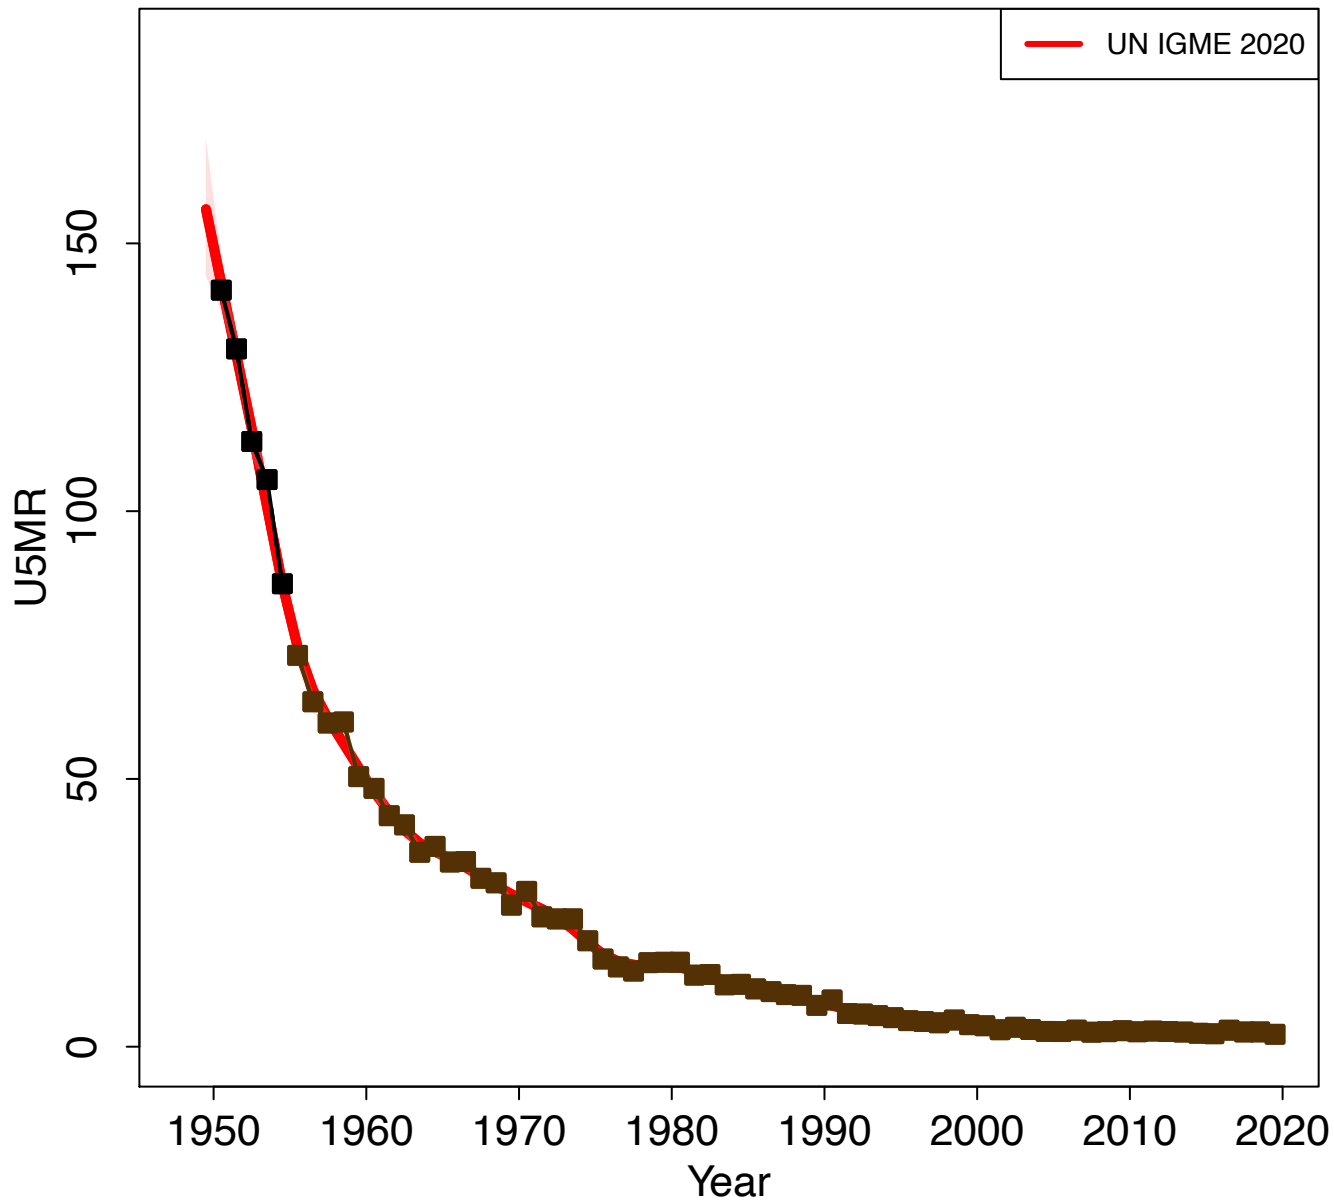

### Zoomed in

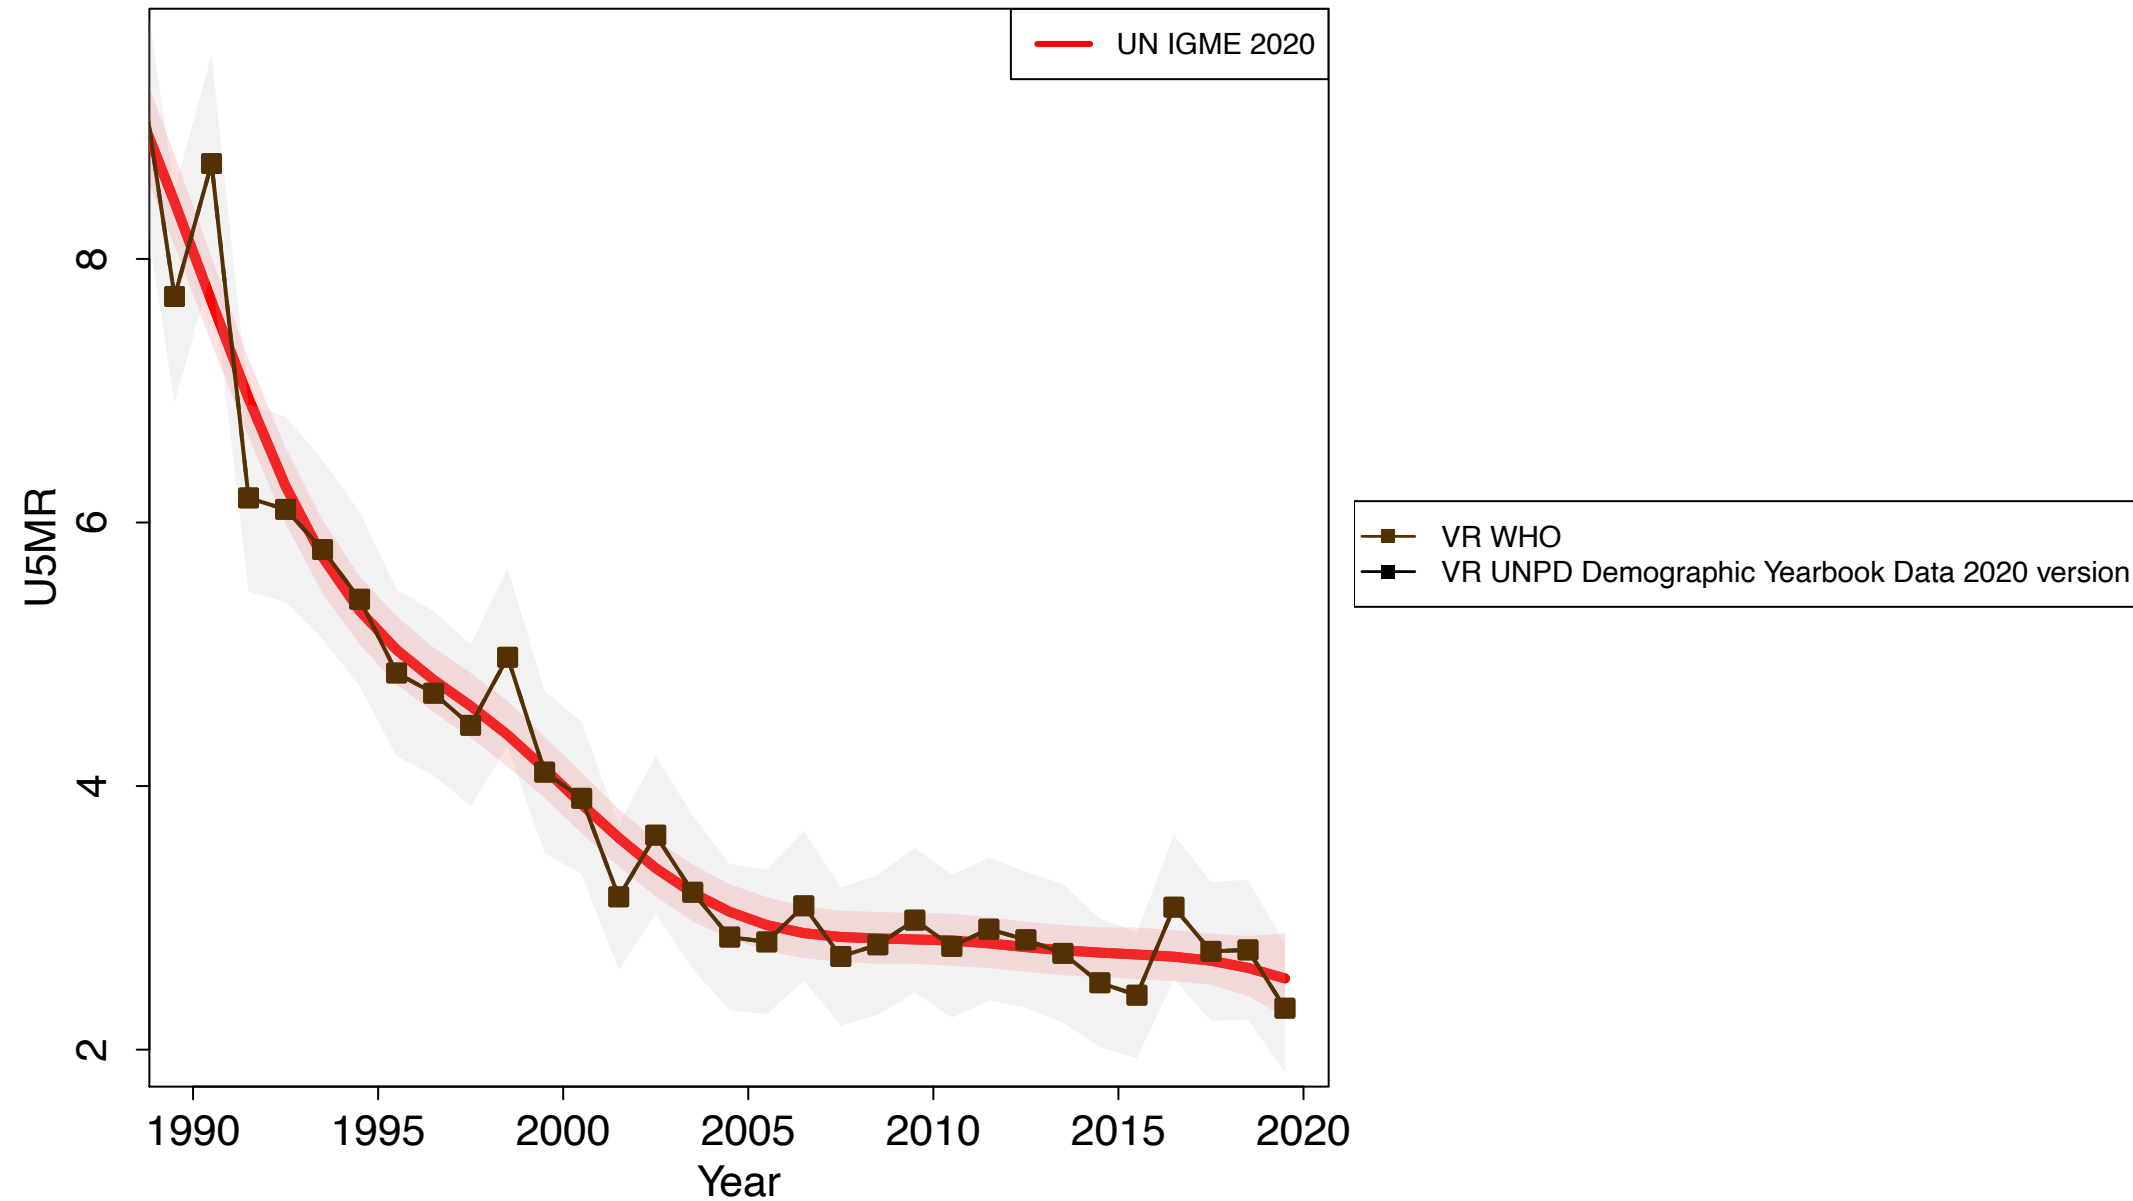

### Slovakia

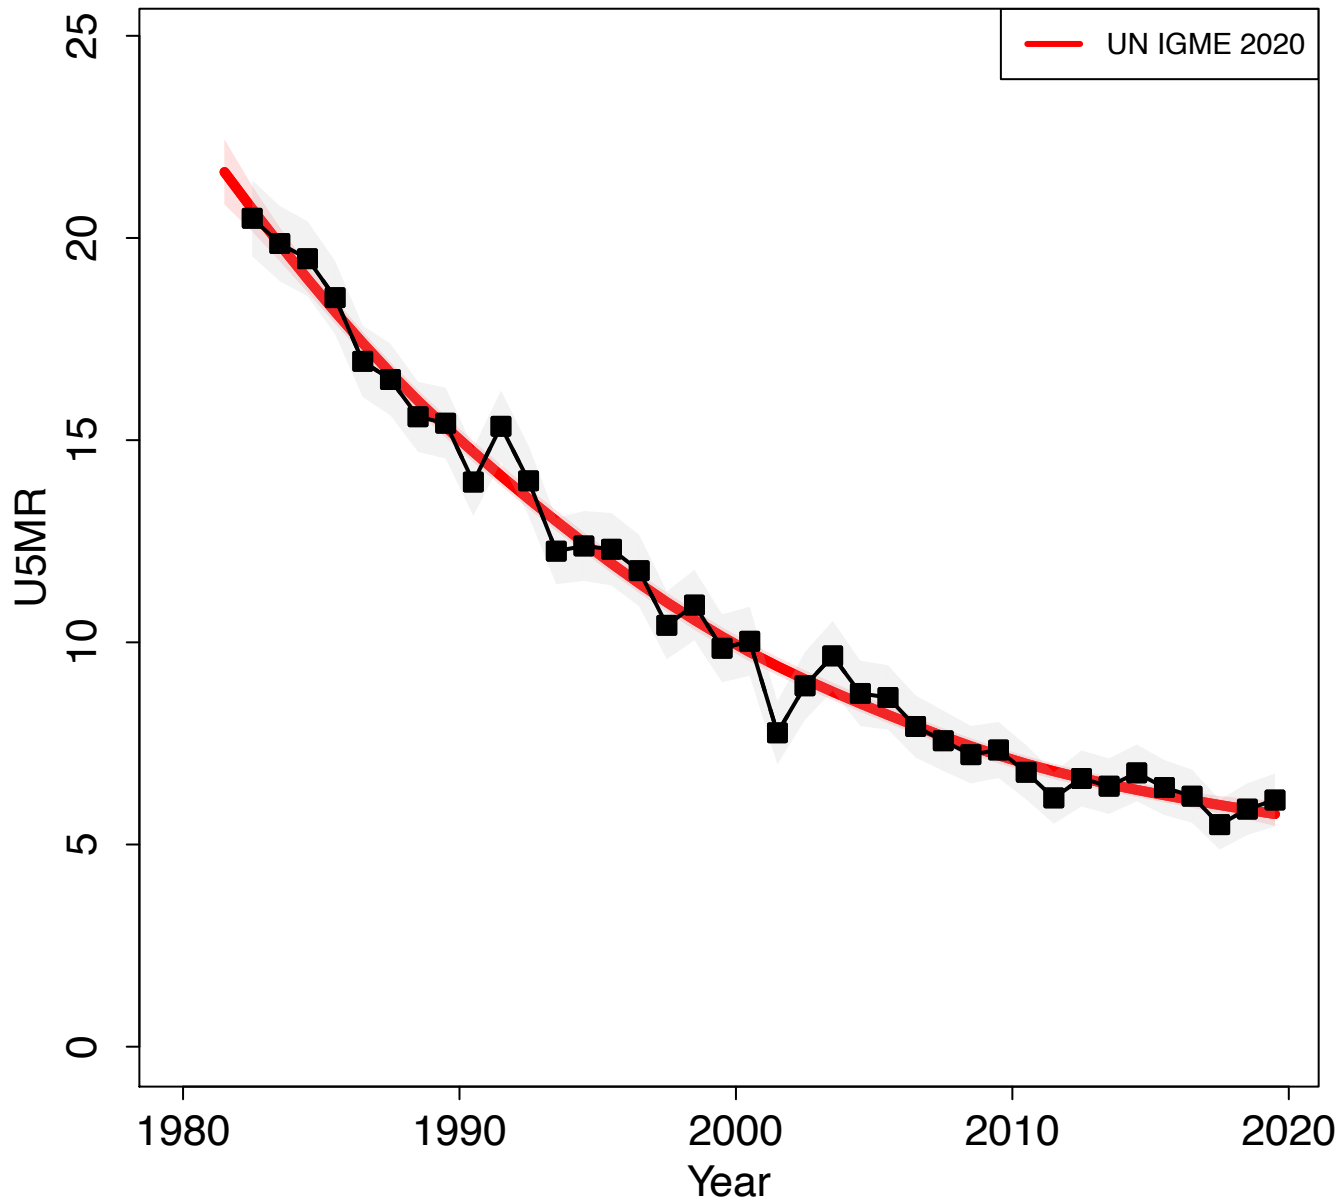

### Zoomed in

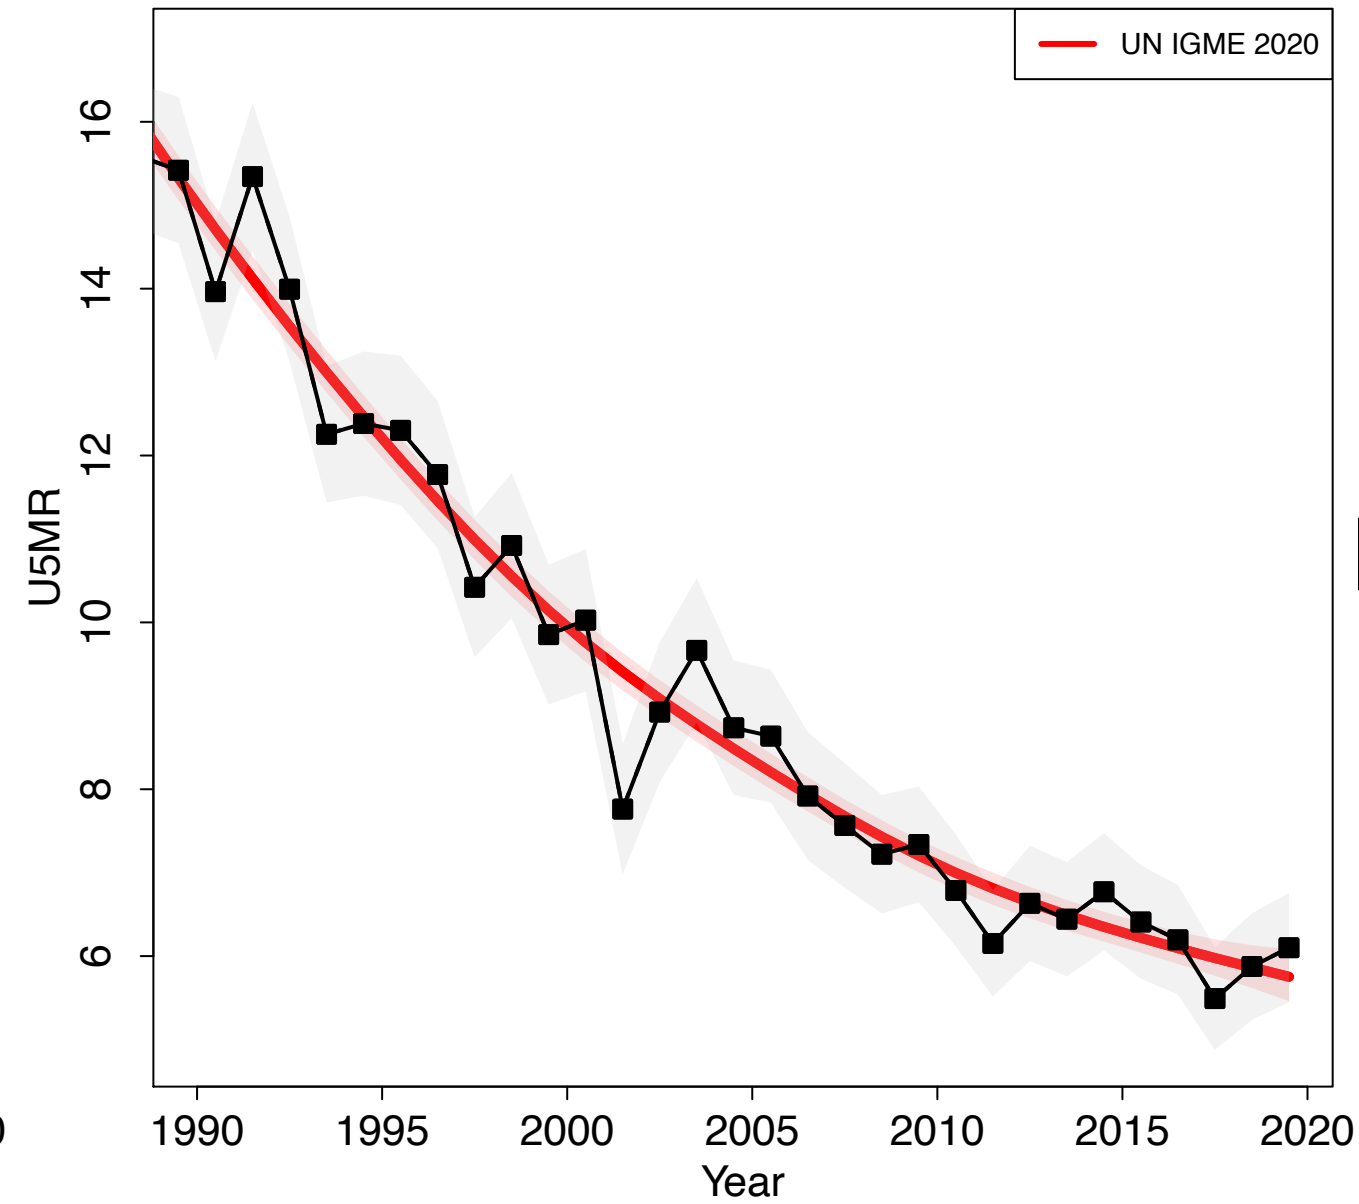

### Slovenia

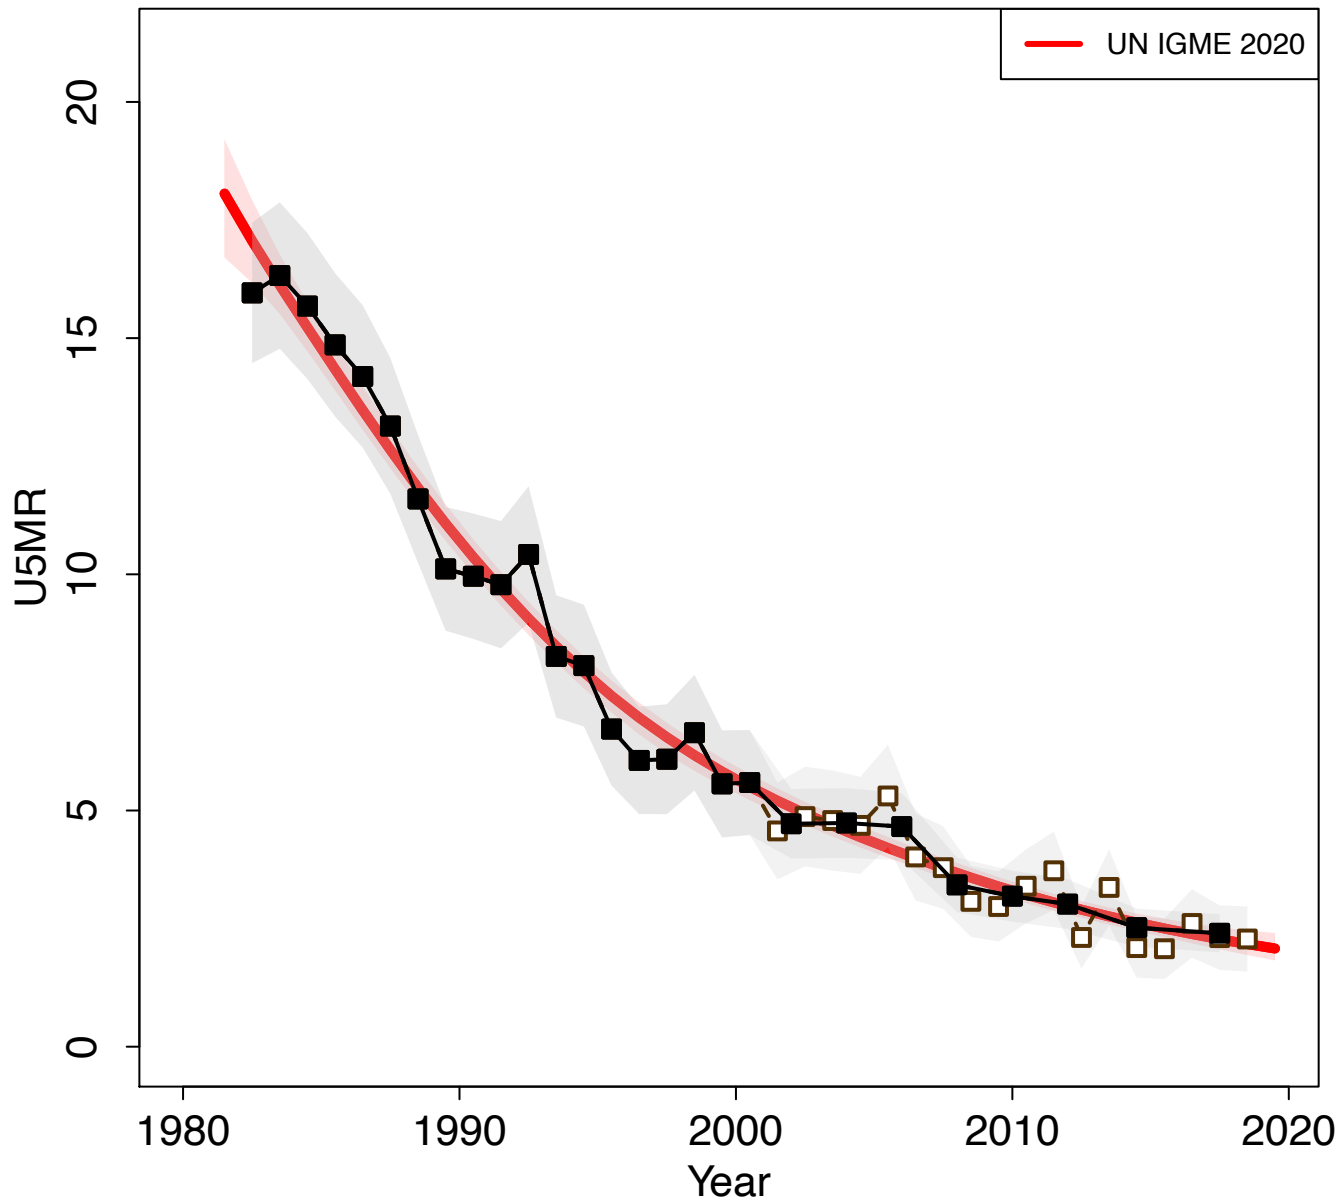

### Zoomed in

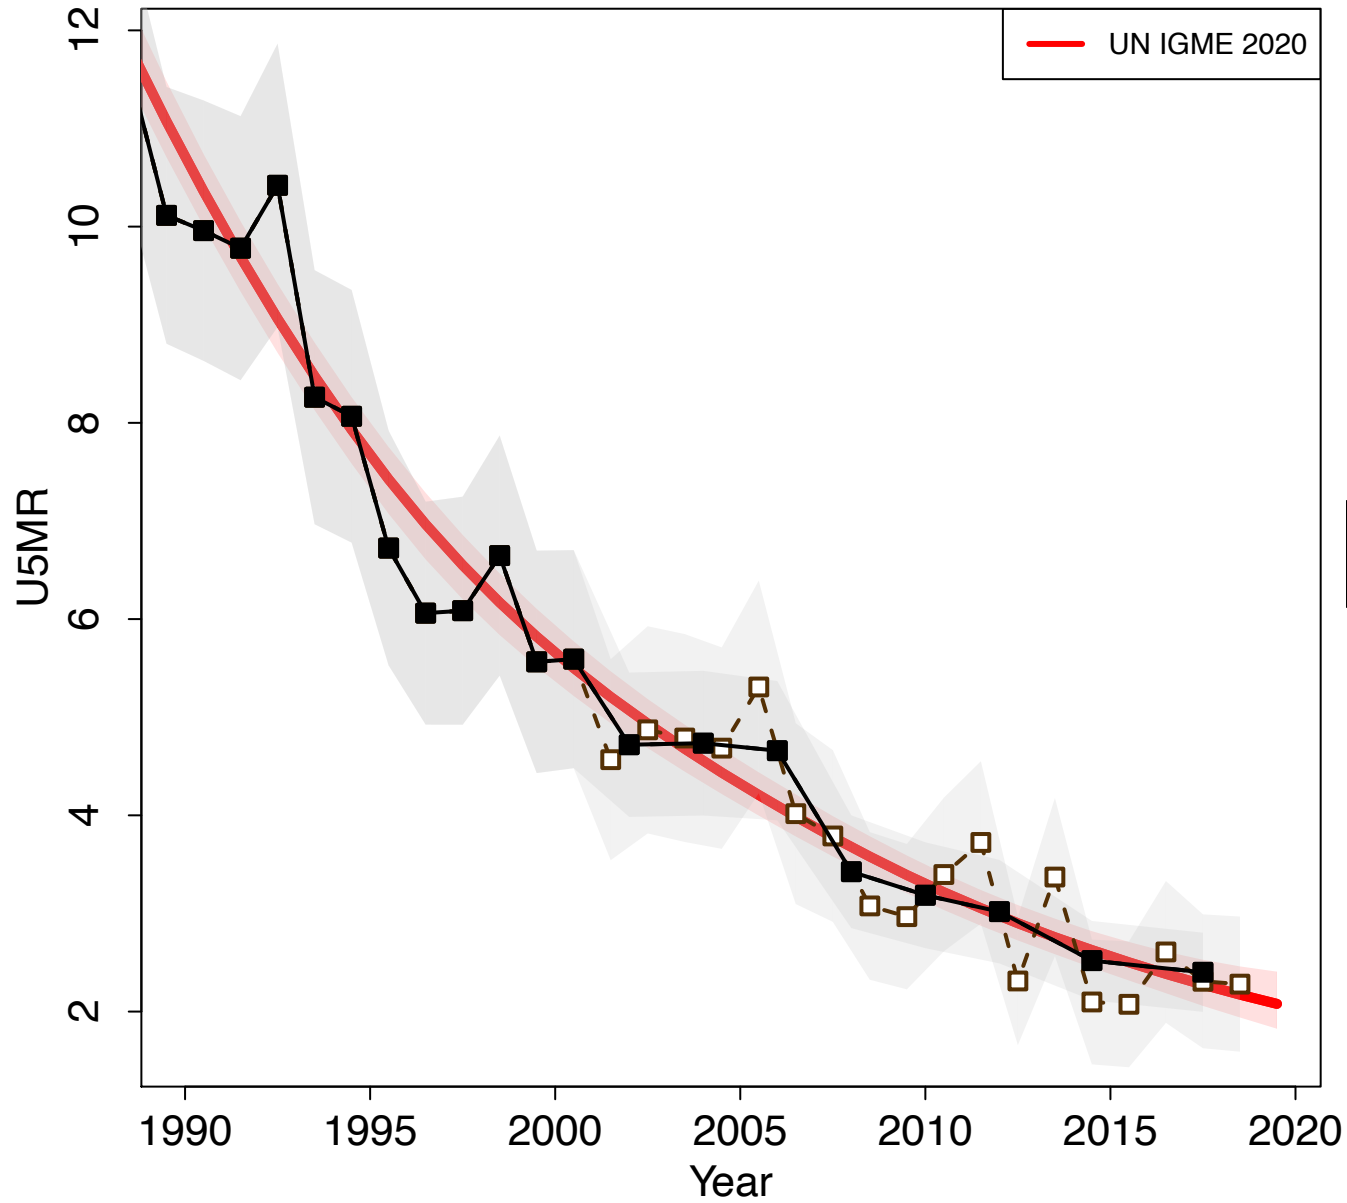

### Solomon Islands

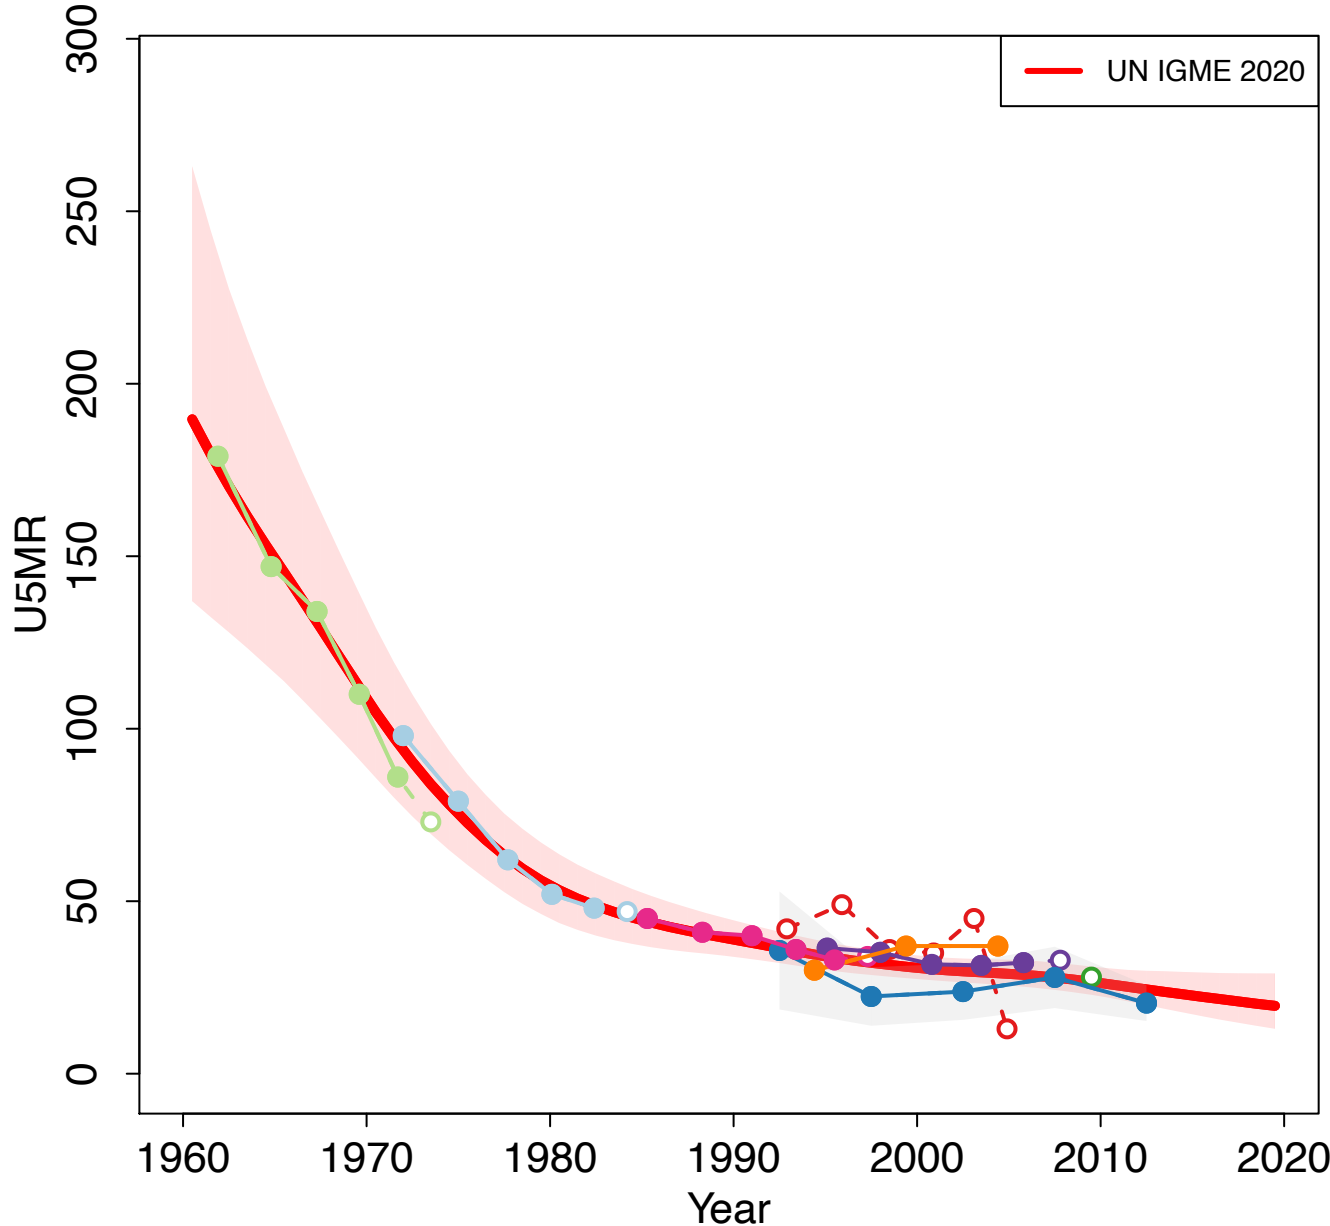

### Zoomed in

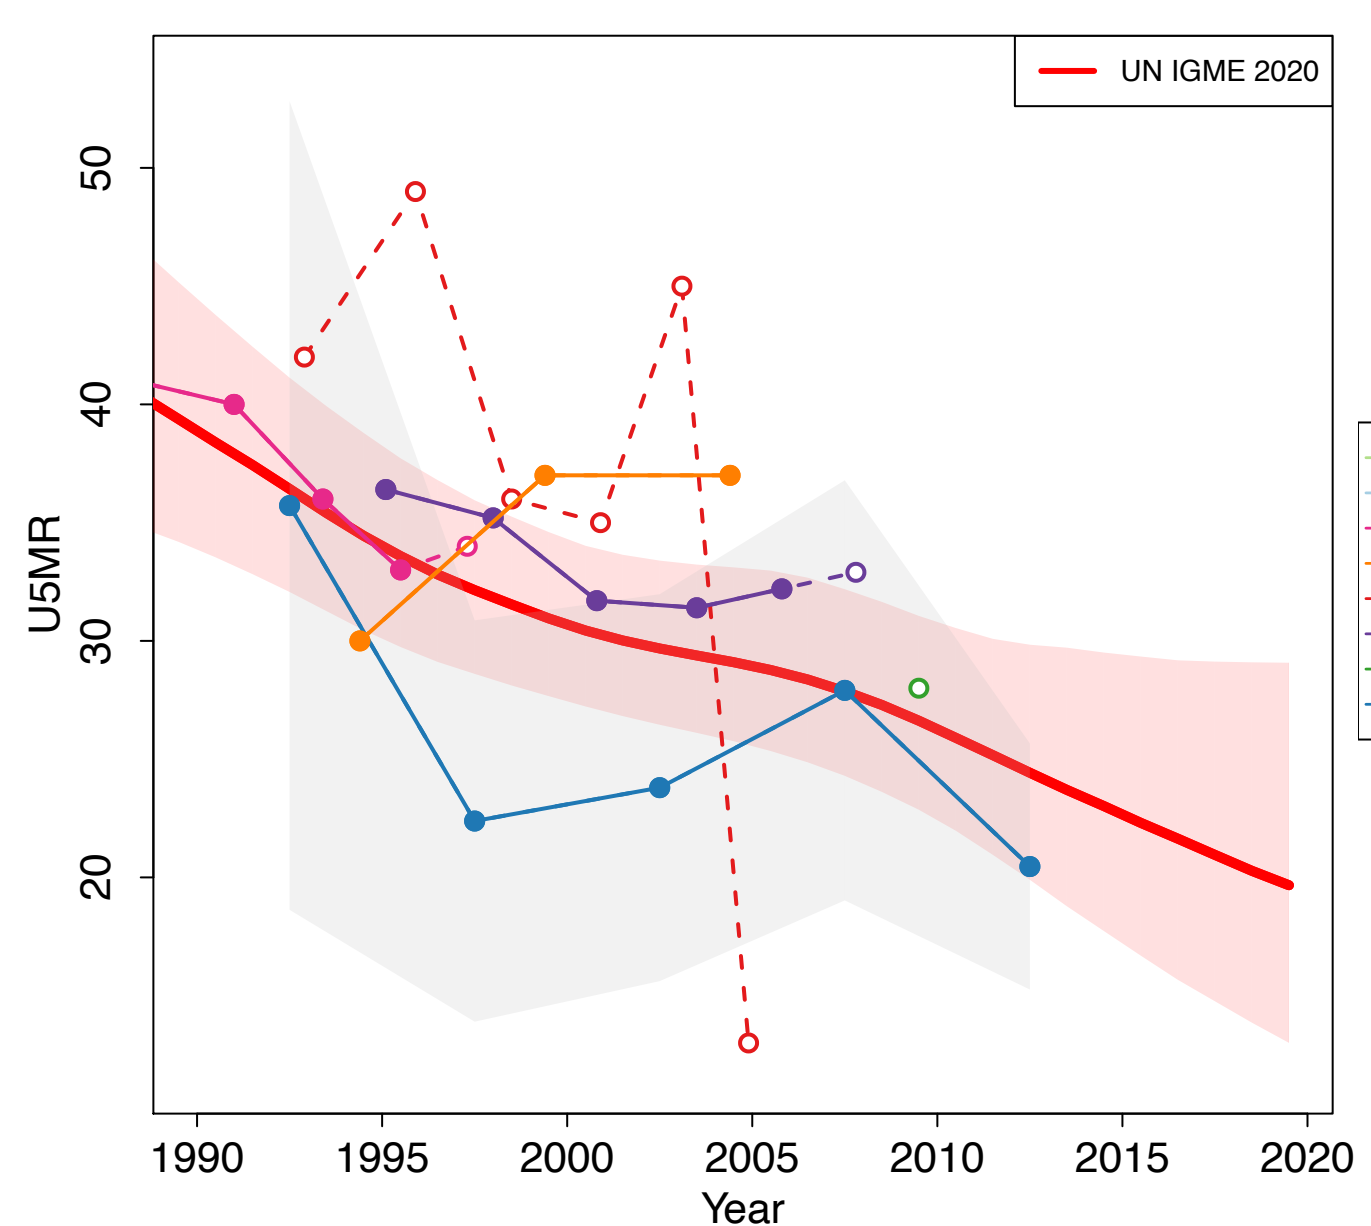

- Census 1976 (Census Indirect)
- Census 1986 (Census Indirect)
- Census 1999 (Census Indirect)
- Demographic and Health Survey 2007 (Other DHS Direct)
- Demographic and Health Survey 2007 (Other DHS Indirect)
- Census 2009 (Census Indirect)
- Census 2009 (Others Household Deaths)
- Demographic and Health Survey 2015 (Other DHS Direct)

### Somalia

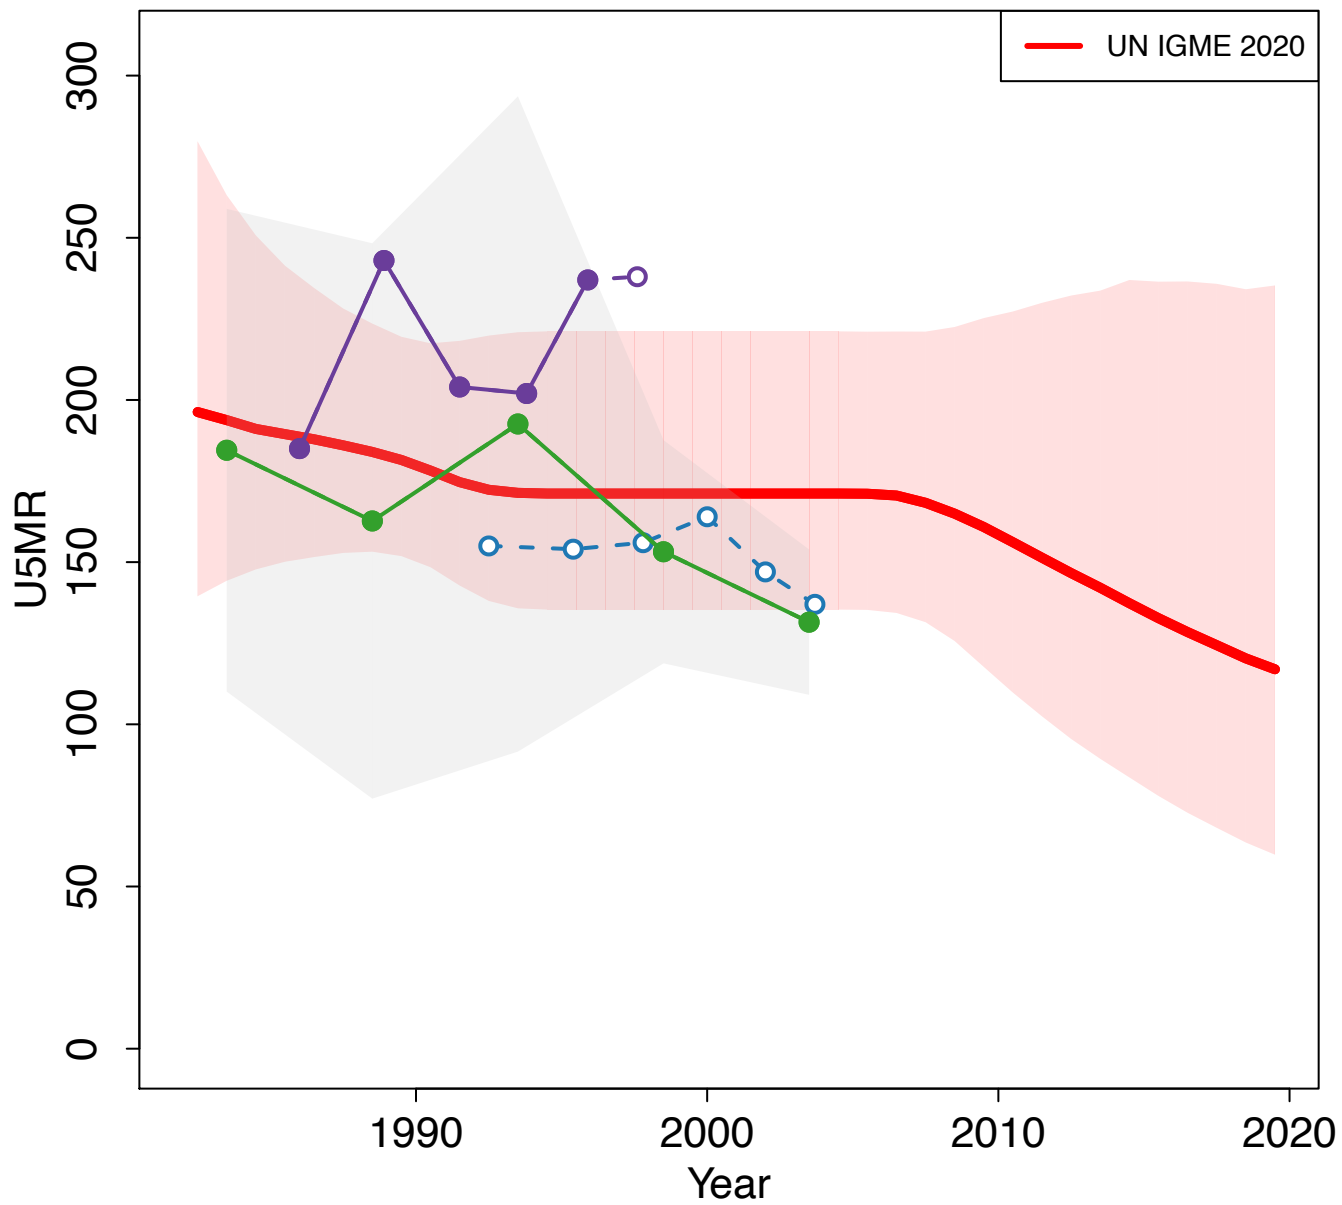

### Zoomed in

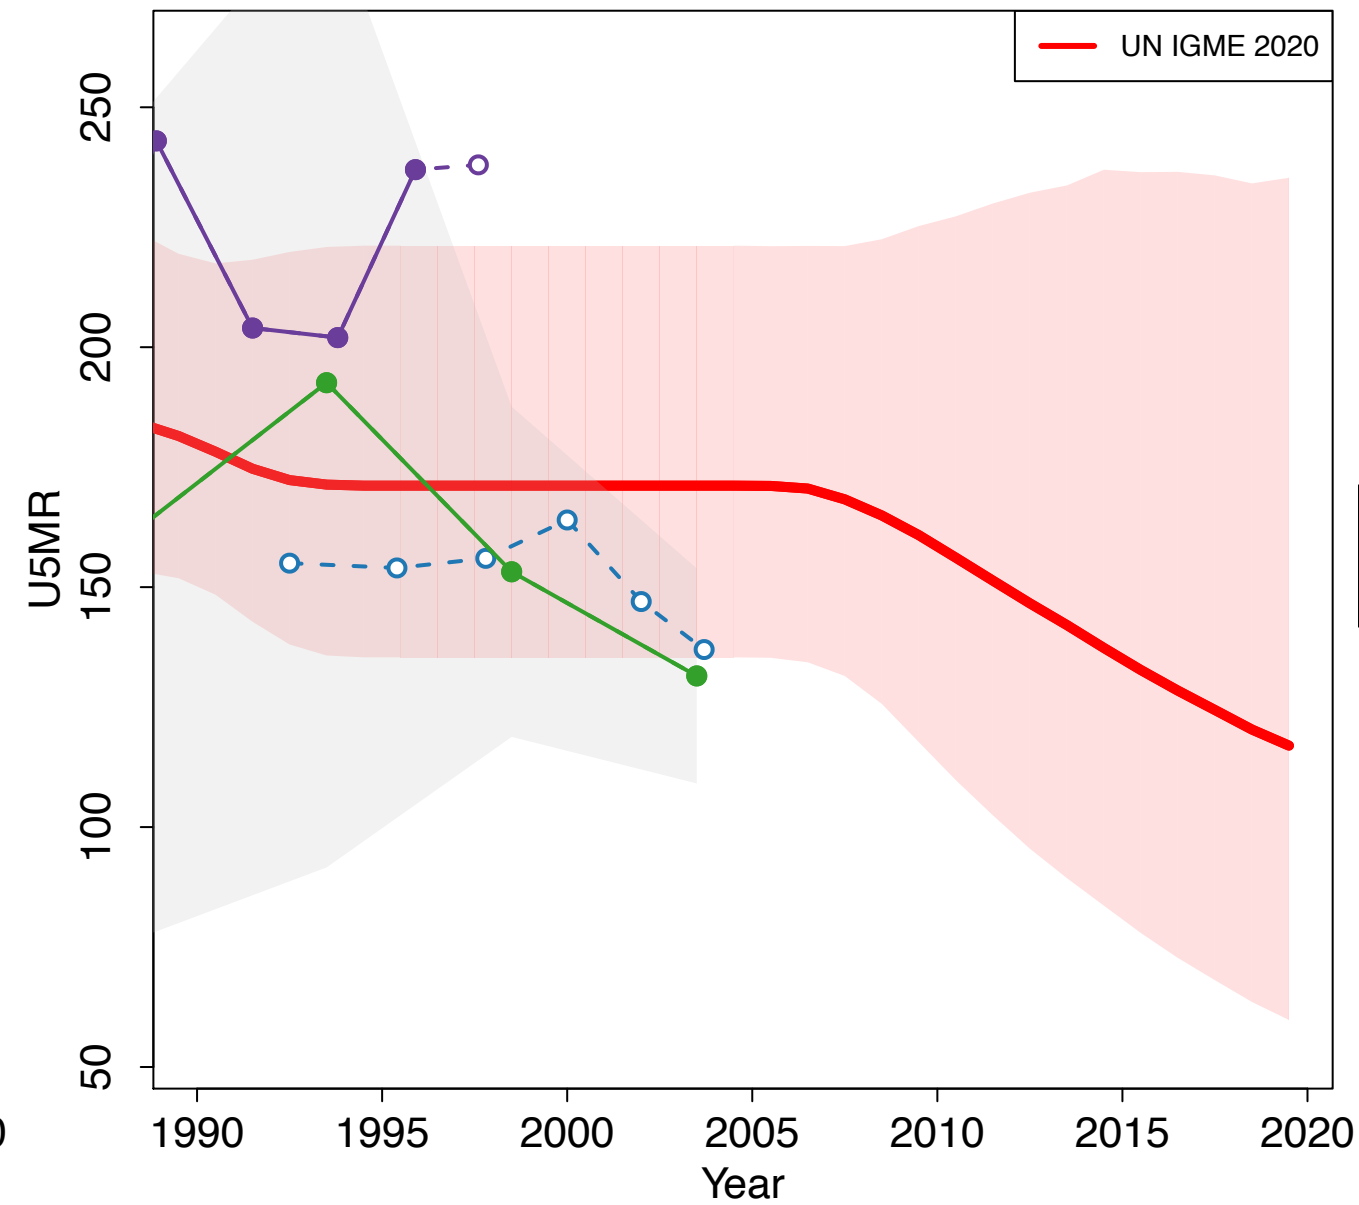

- Multiple Indicator Cluster Survey 1999 (Others Indirect)
- Multiple Indicator Cluster Survey 2006 (MICS Direct)
- Multiple Indicator Cluster Survey 2006 (Others Indirect)



### South Africa

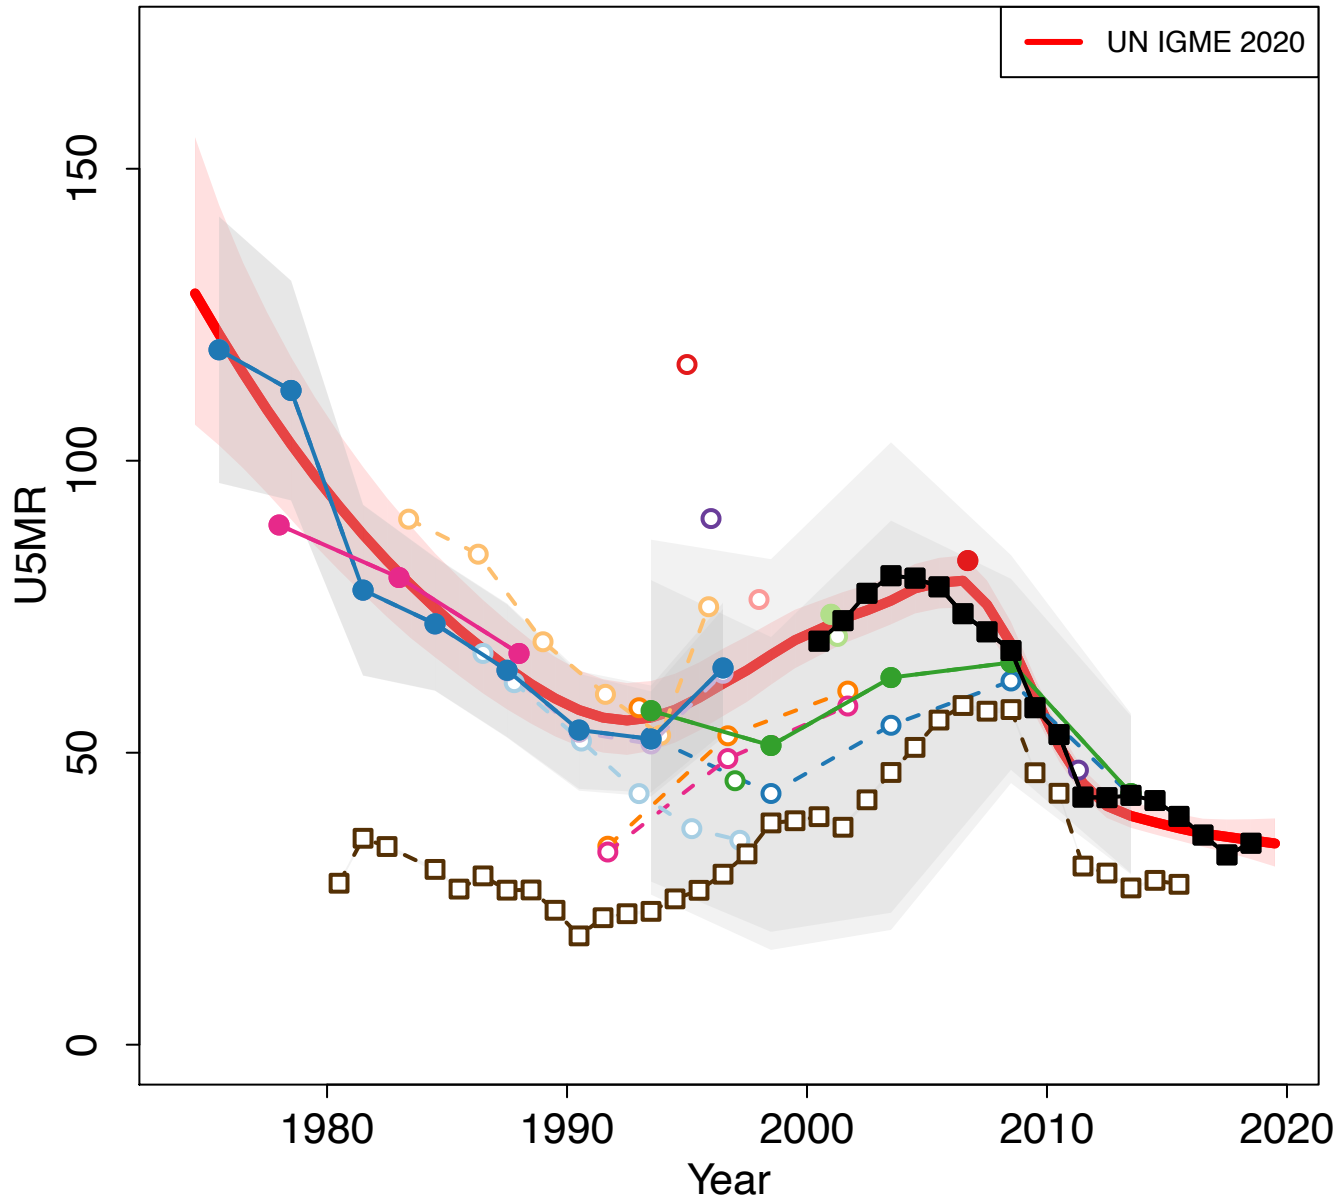

### Zoomed in

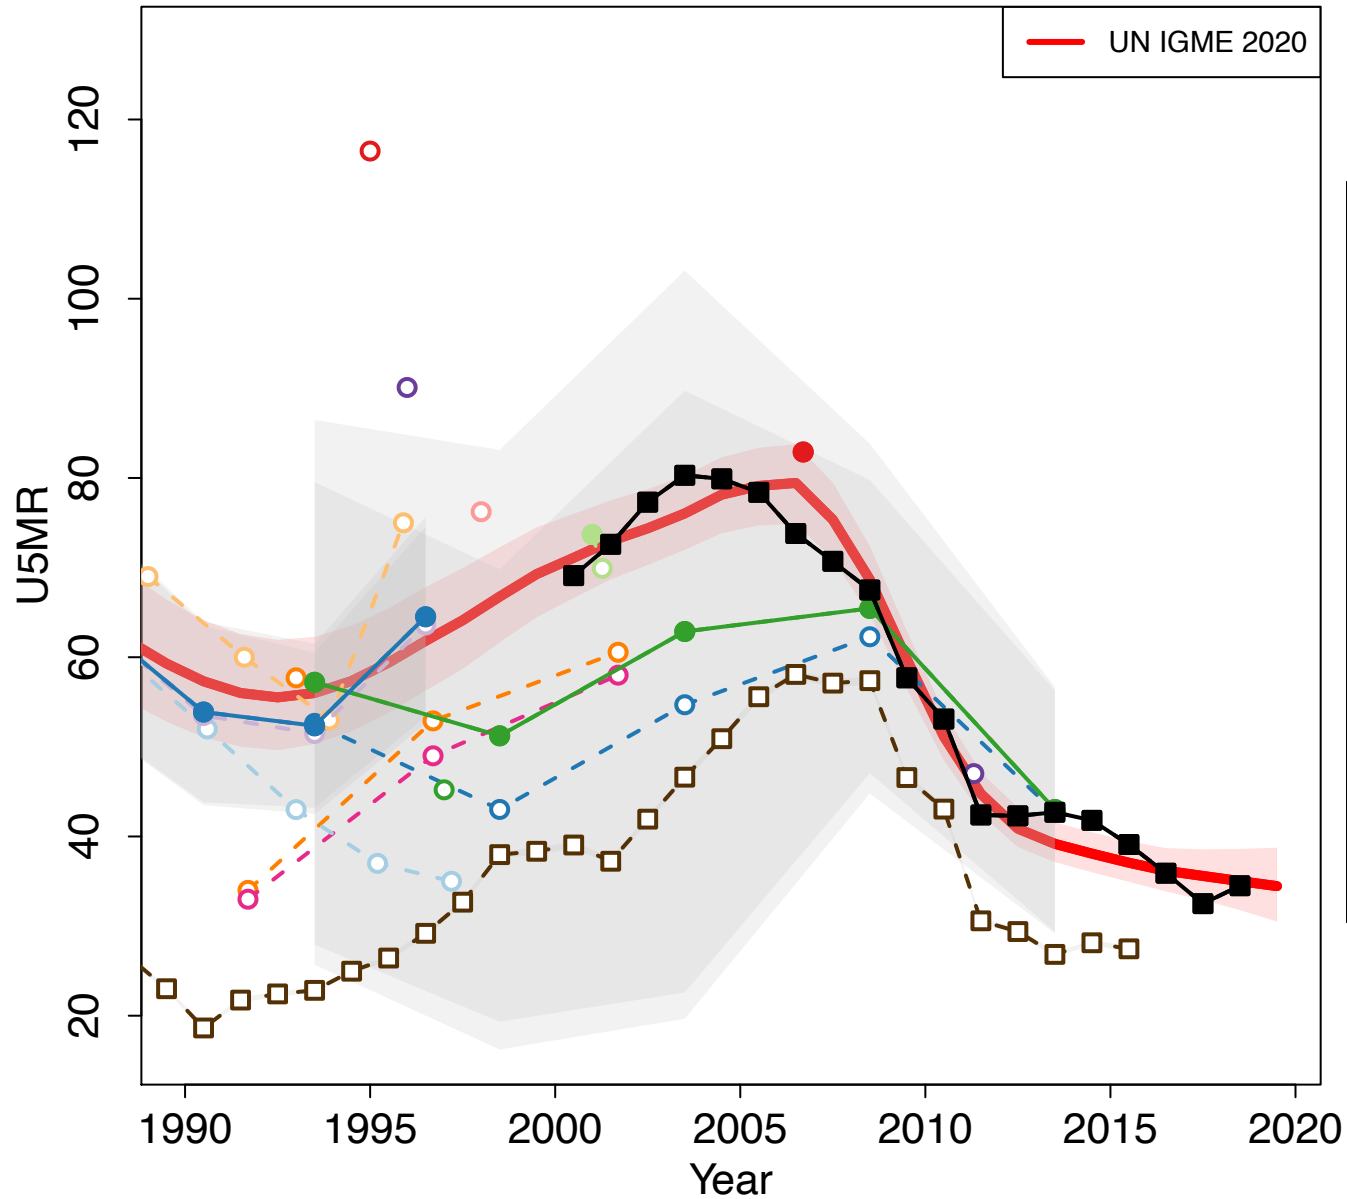

- Demographic and Health Survey 1987–1989 (Other DHS Direct)
- HSRC 1990 (Others Direct)
- Household Survey 1993 (Others Household Deaths)
- Household Survey 1995 (Others Household Deaths)
- Household Survey 1996 (Others Household Deaths)
- Household Survey 1997 (Others Household Deaths)
- Demographic and Health Survey (MM adjusted) 1998 (DHS Direct)
- Demographic and Health Survey 1998 (DHS Direct)
- Demographic and Health Survey 1998 (DHS Indirect)
- Household Survey 1998 (Others Household Deaths)
- Census 2001 (Others Household Deaths)
- Census 2001 (Census Indirect)
- Demographic and Health Survey 2004 (DHS Direct)
- Demographic and Health Survey (MM adjusted) 2004 (DHS Direct)
- Community Survey 2007 (Others Household Deaths)
- Census 2011 (Others Household Deaths)
- Demographic and Health Survey (MM adjusted) 2016 (DHS Direct)
- Demographic and Health Survey 2016 (DHS Direct)
- VR WHO
- SVR Rapid Mortality Surveillance (Preliminary)

### South Sudan

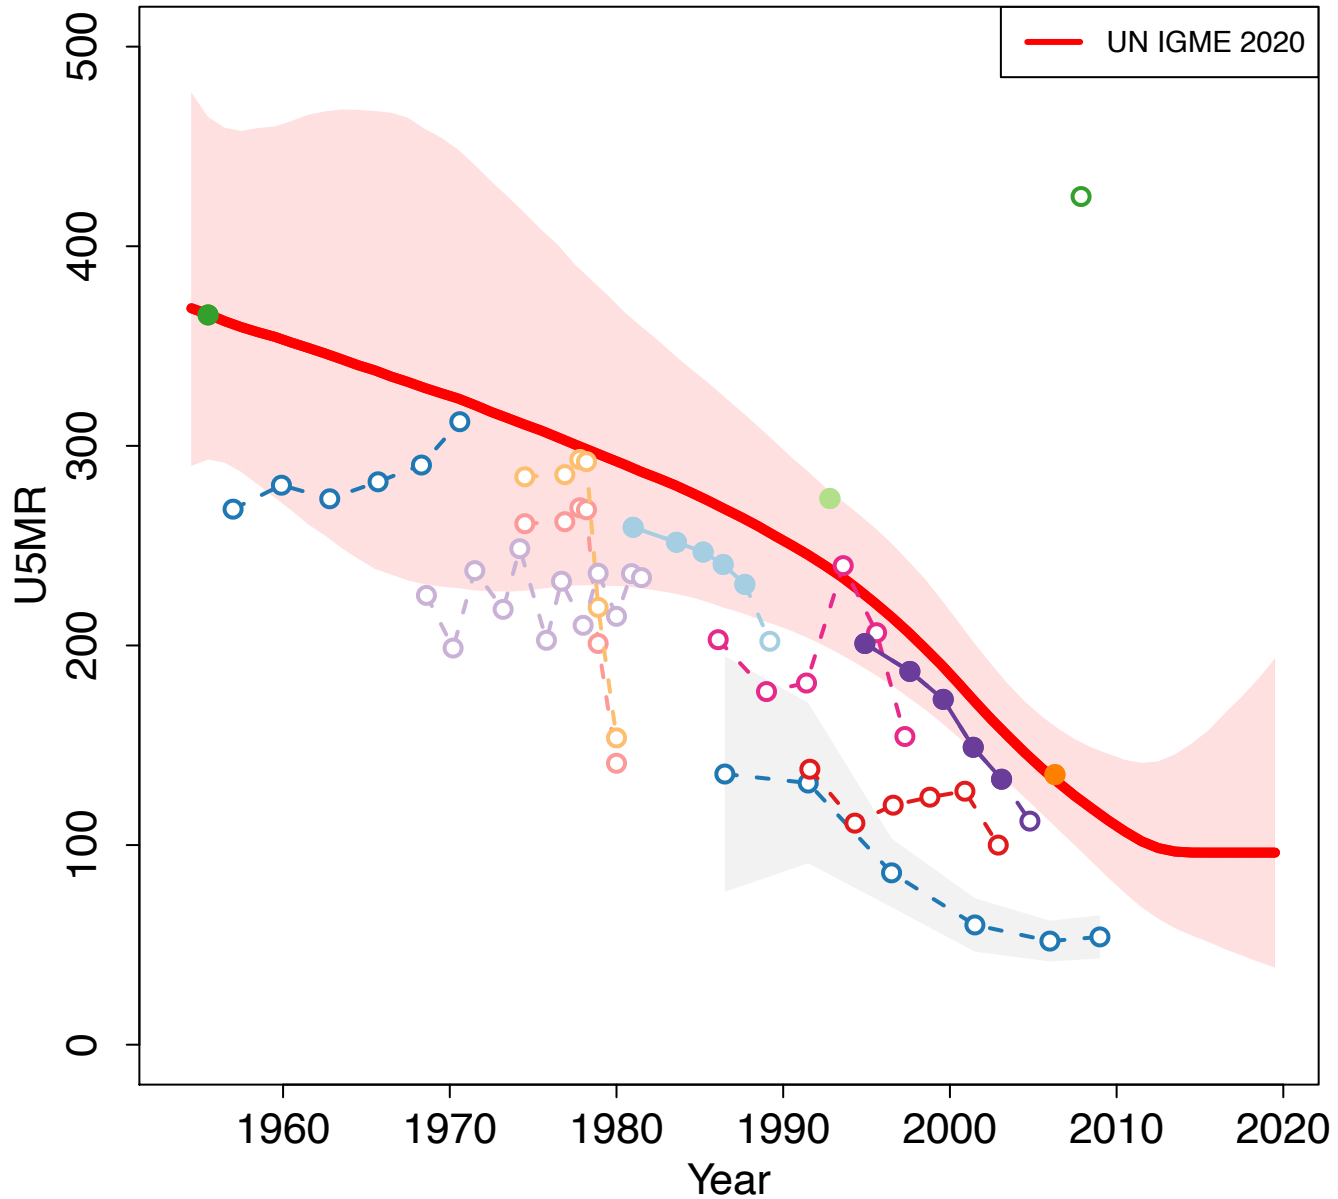

### Zoomed in

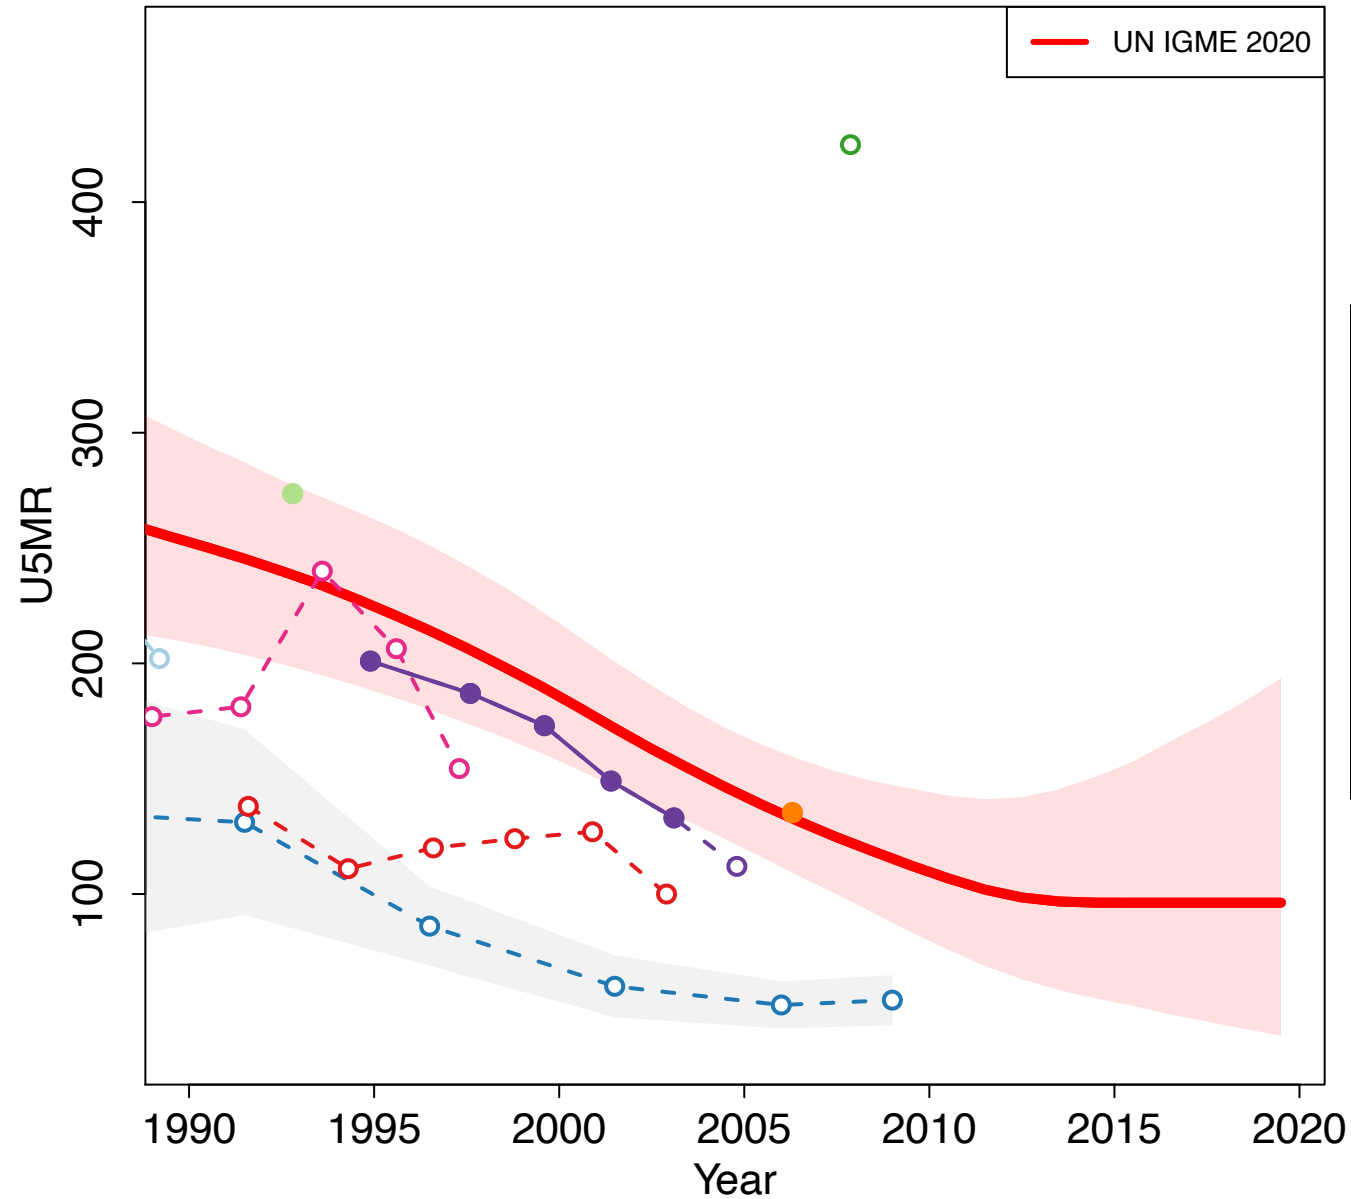

- Census 1955–1956 (Others Household Deaths)
- Census 1973 (Census Indirect)
- Census 1983 (Census Indirect)
- UNICEF Survey 1985 (Others Indirect)
- UNICEF Survey (Urban) 1985 (Others Indirect)
- Census 1993 (Others Household Deaths)
- Census 1993 (Census Indirect)
- Demography of Forced Migration Project DFMP survey 1999 (Others Indirect)
- Sudan Household Health Survey 2006 (Others Household Deaths)
- Sudan Household Health Survey 2006 (Others Indirect)
- Census 2008 (Census Indirect)
- Census 2008 (Others Household Deaths)
- Household Health Survey 2010 (MICS Direct)

### Spain

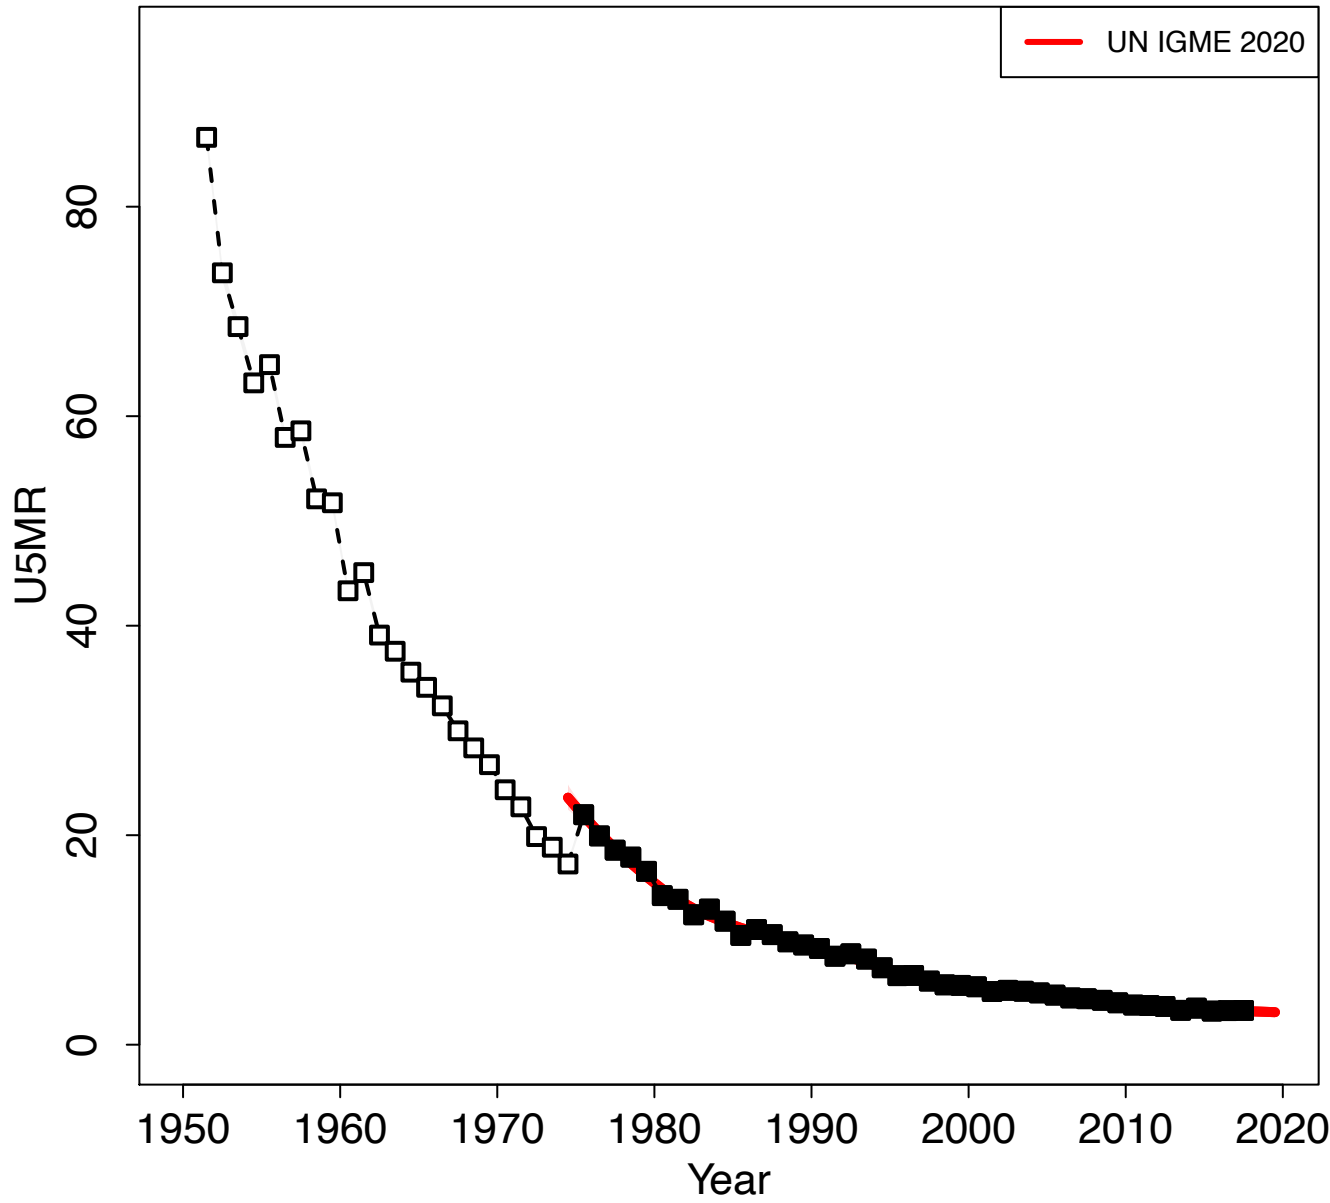

### Zoomed in

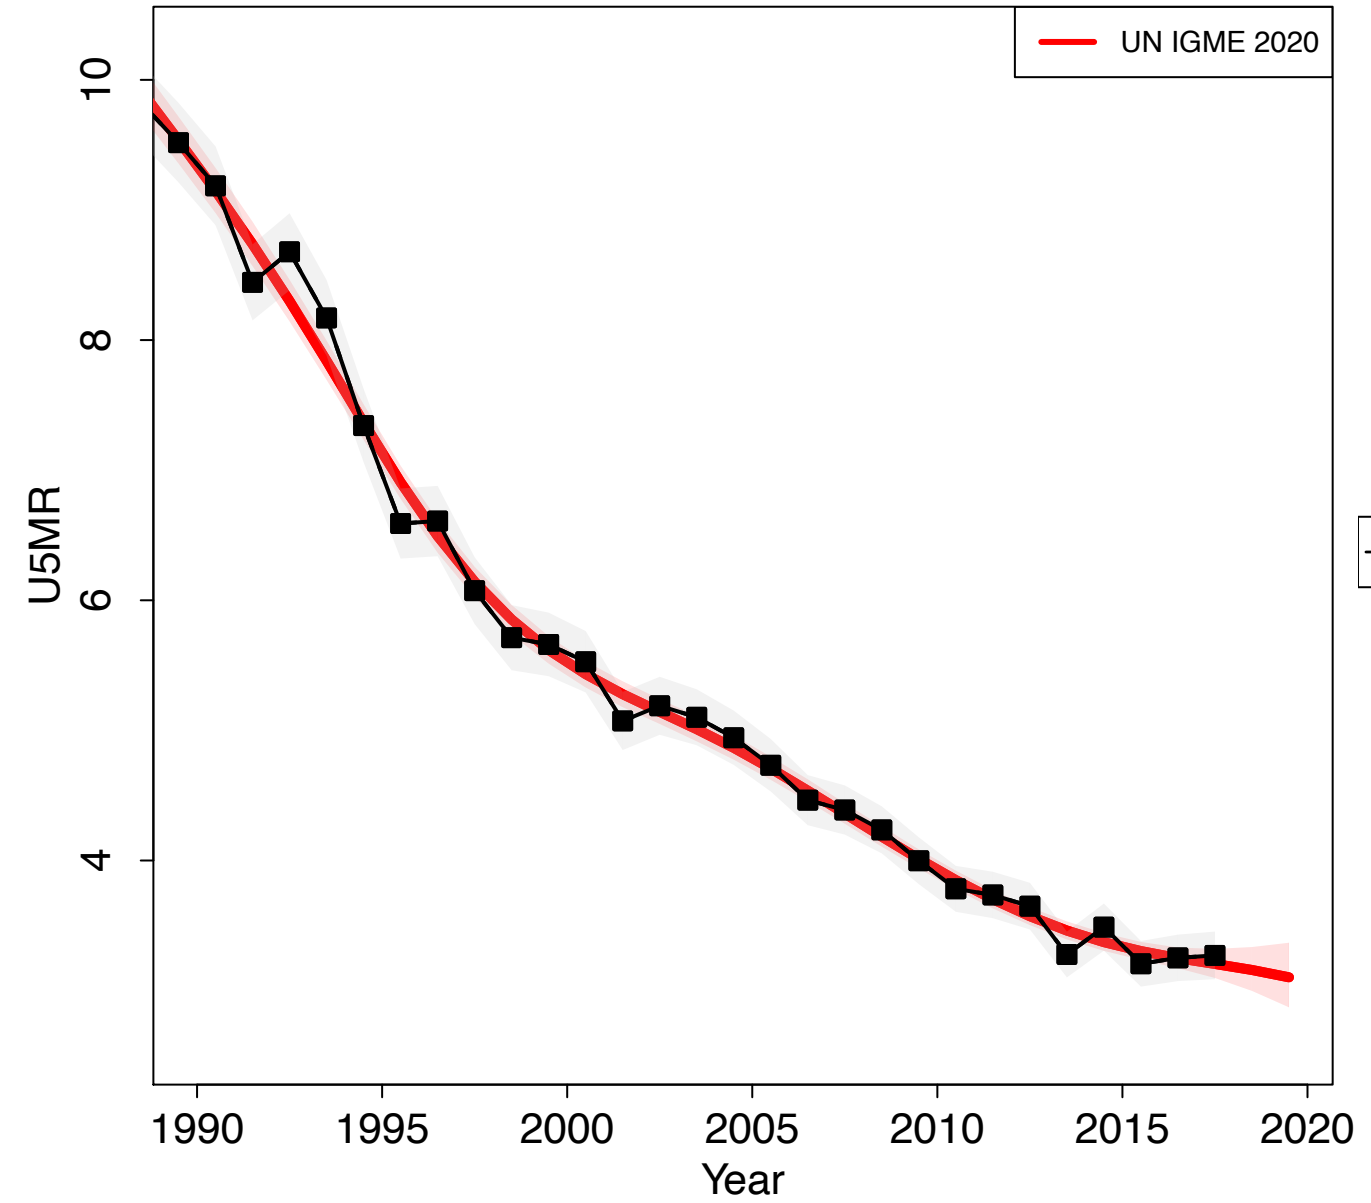

### Sri Lanka

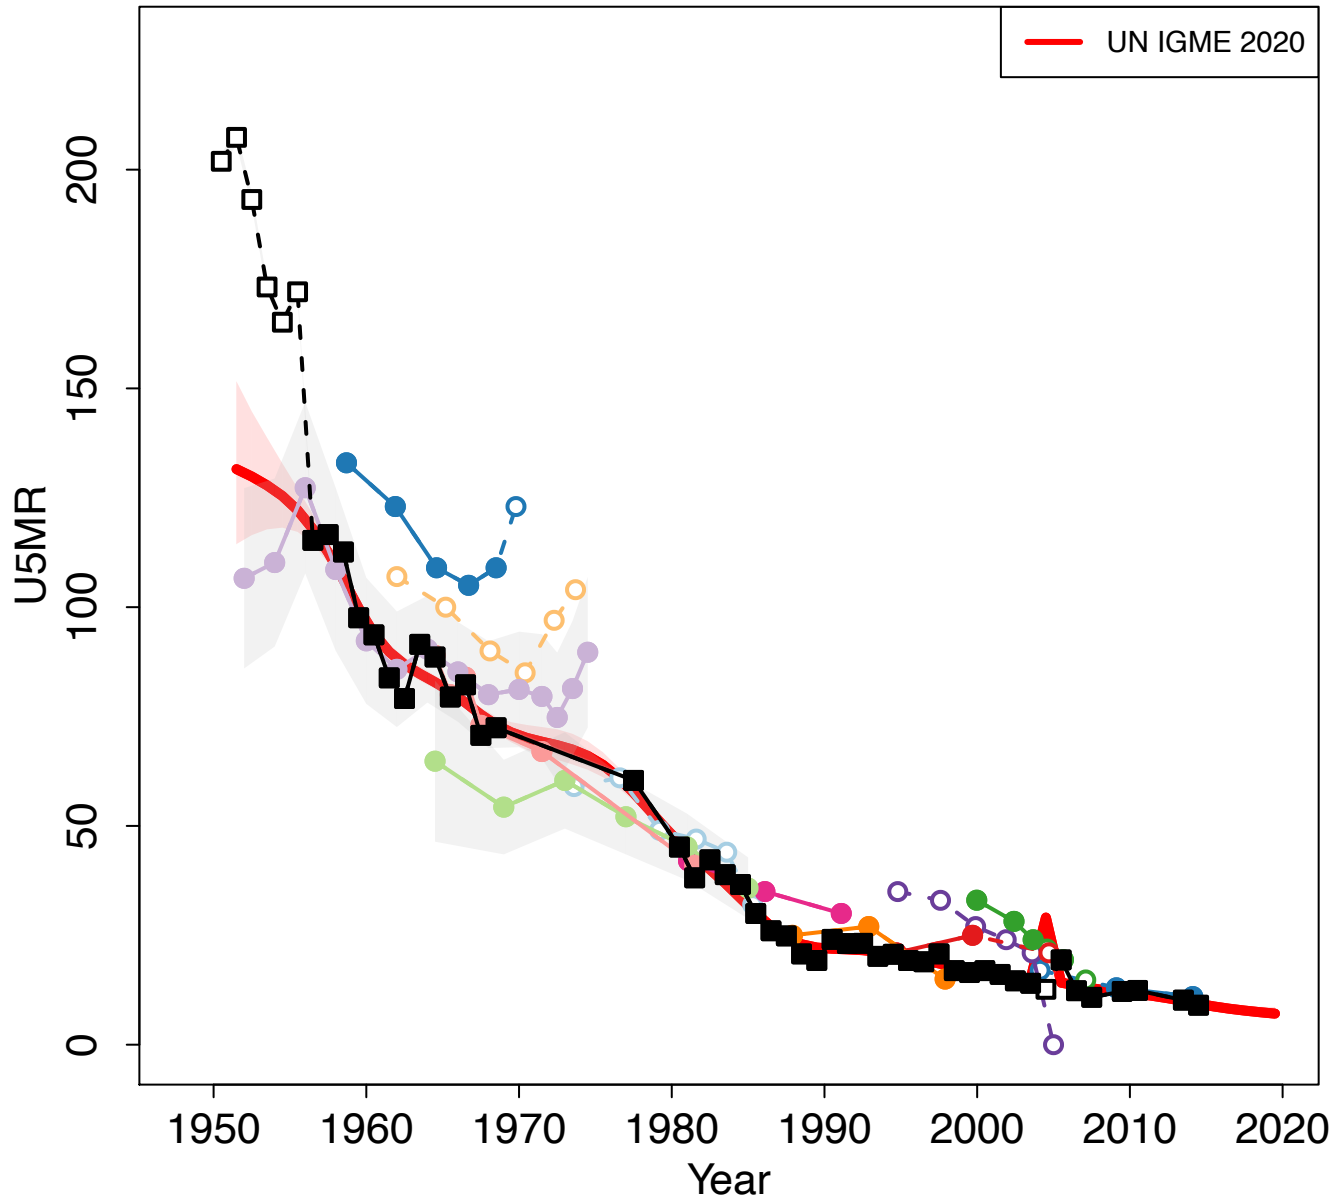

### Zoomed in

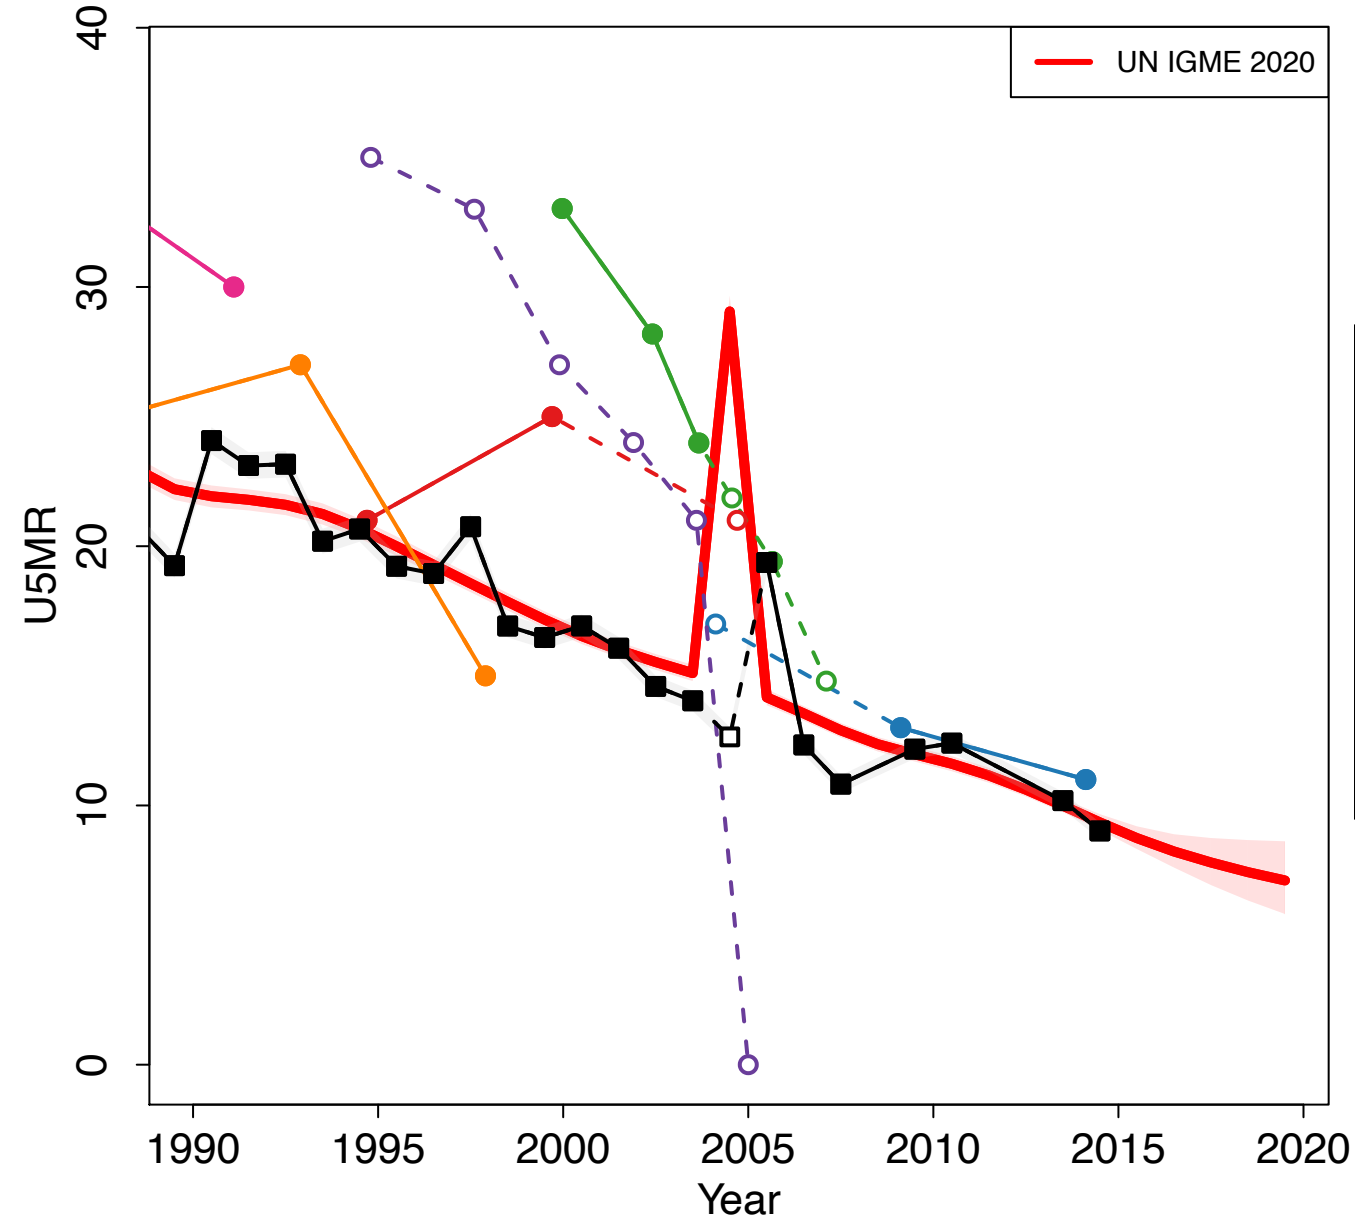

- Census 1971 (Census Indirect)
- World Fertility Survey 1975 (Other DHS Direct)
- World Fertility Survey 1975 (Other DHS Indirect)
- National life table 1981 (Others Life Table)
- Demographic and Health Survey 1987 (DHS Direct)
- Demographic and Health Survey 1987 (DHS Indirect)
- Demographic and Health Survey 1993 (Other DHS Direct)
- Demographic and Health Survey 2000 (Other DHS Direct)
- Demographic and Health Survey 2006 (Other DHS Direct)
- Demographic and Health Survey 2006 (Other DHS Indirect)
- Census 2012 (Census Indirect)
- Demographic and Health Survey 2016 (Other DHS Direct)
- VR WHO

### Saint Vincent and the Grenadines

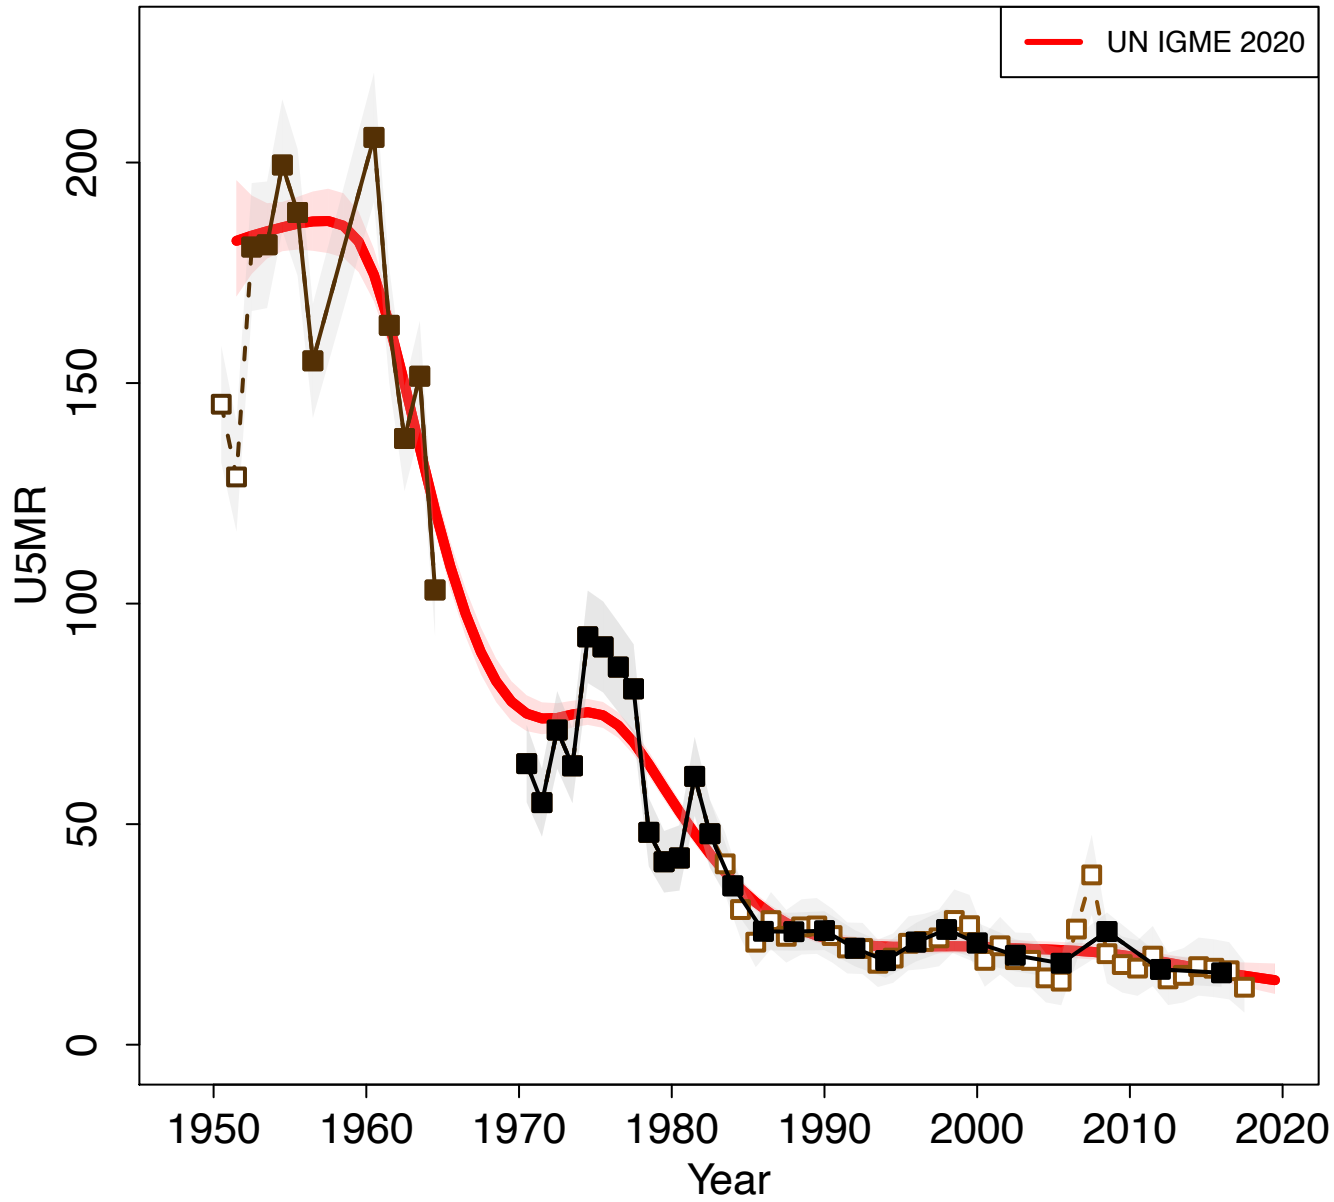

### Zoomed in

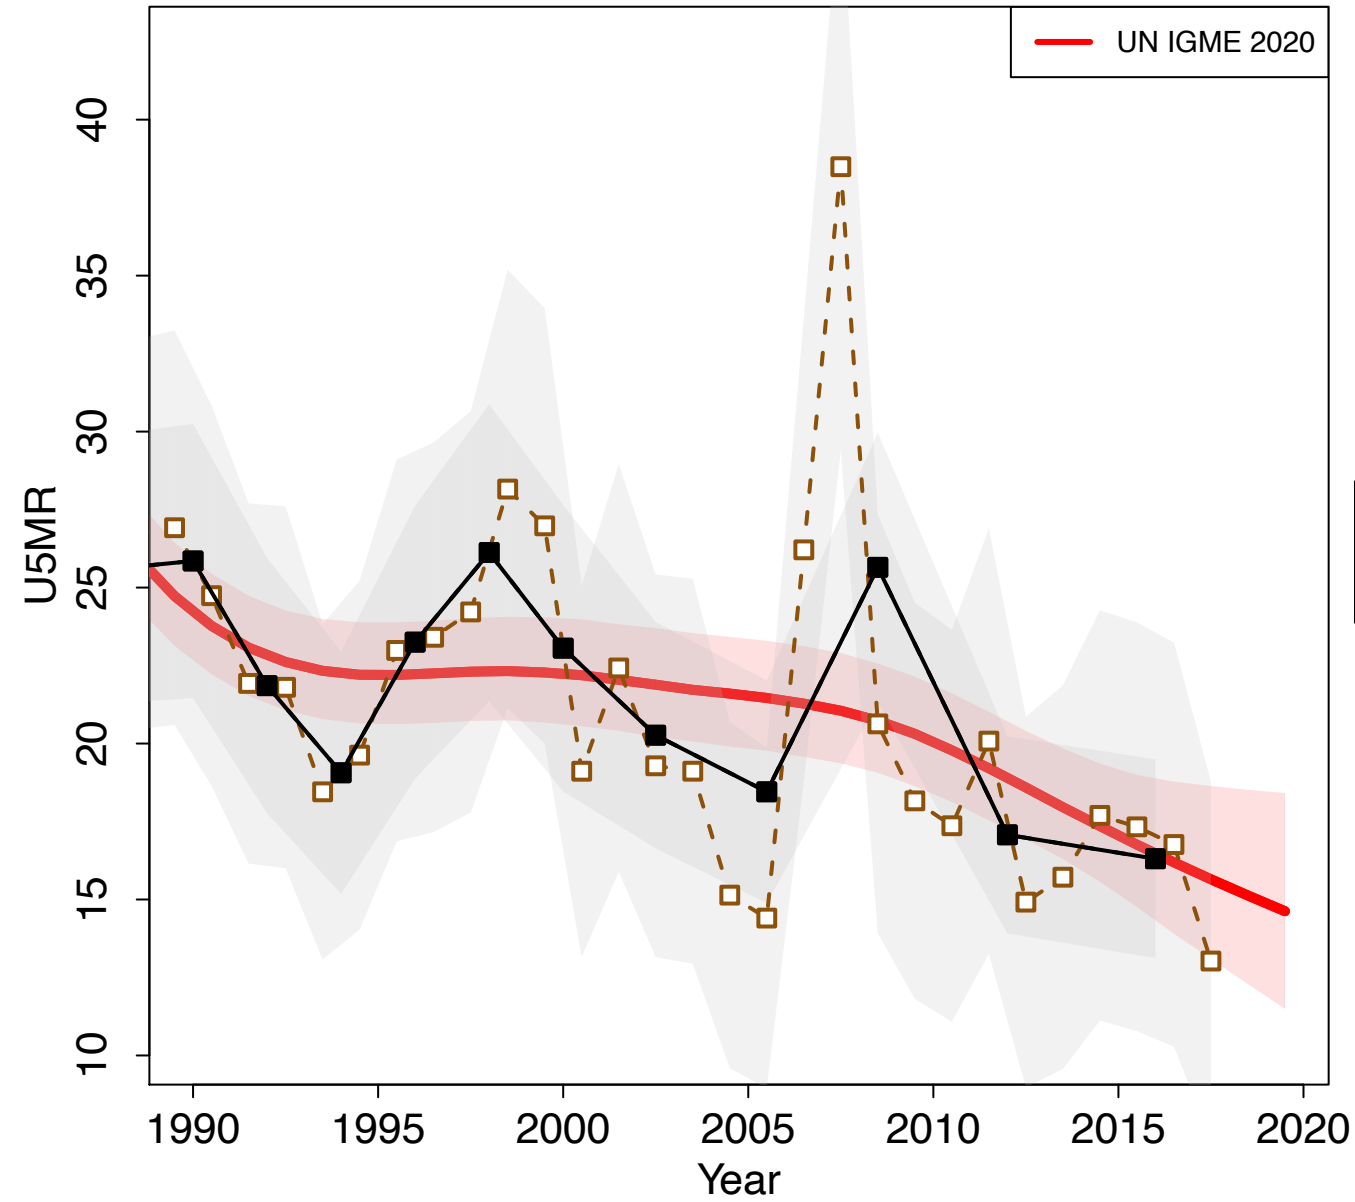

### State of Palestine

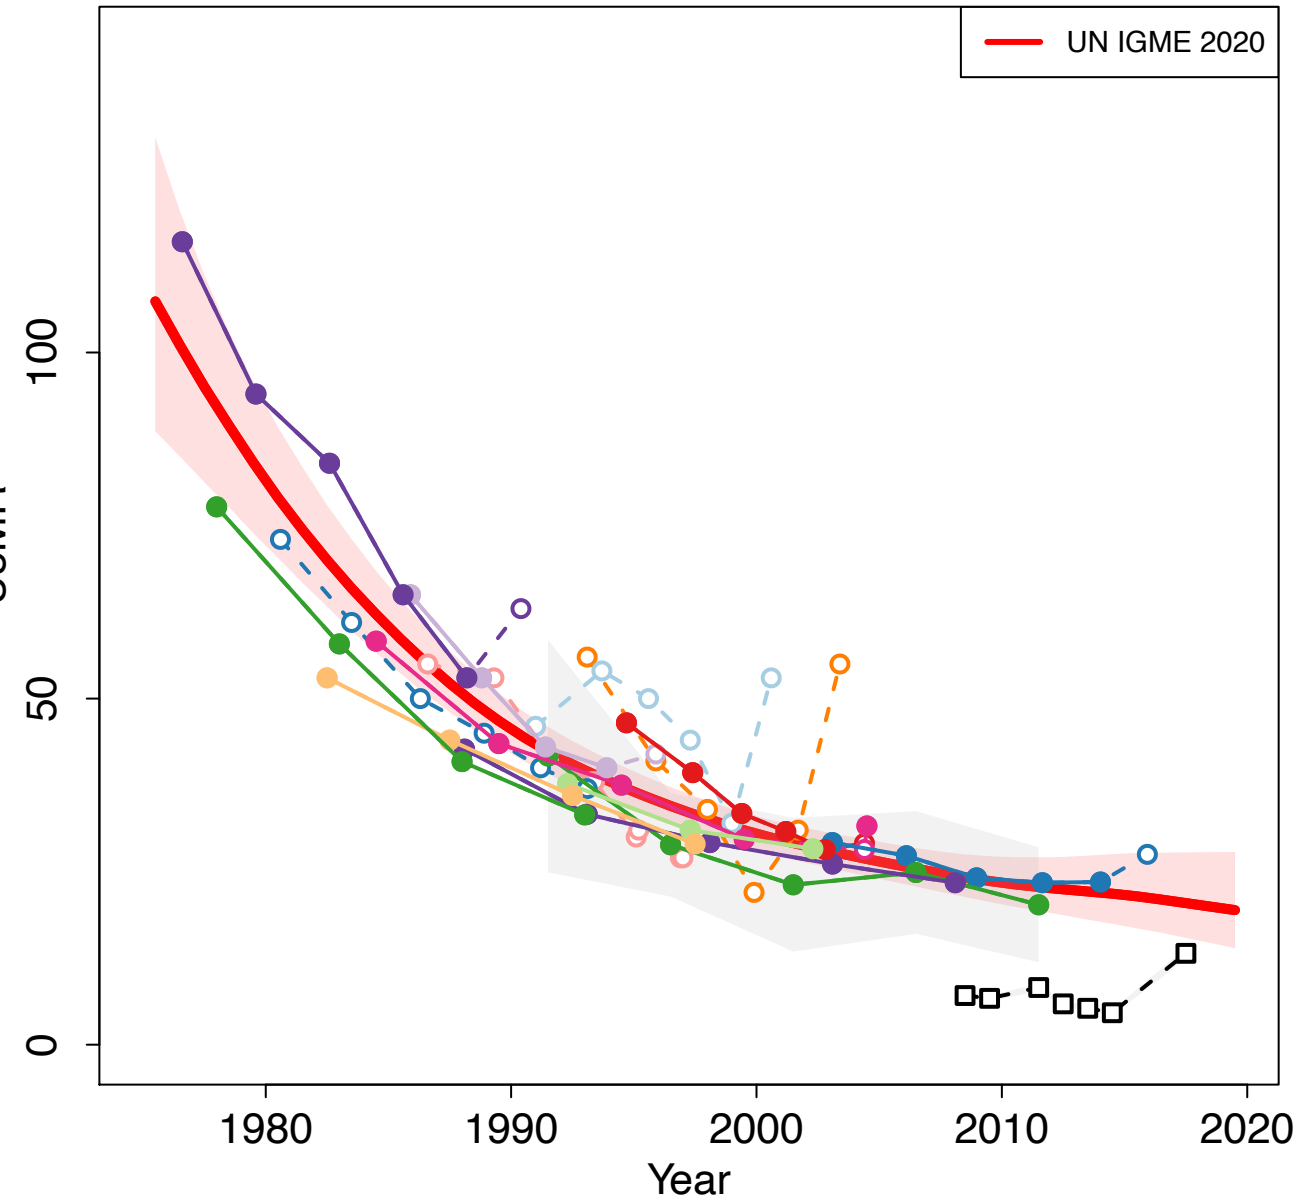

### Zoomed in

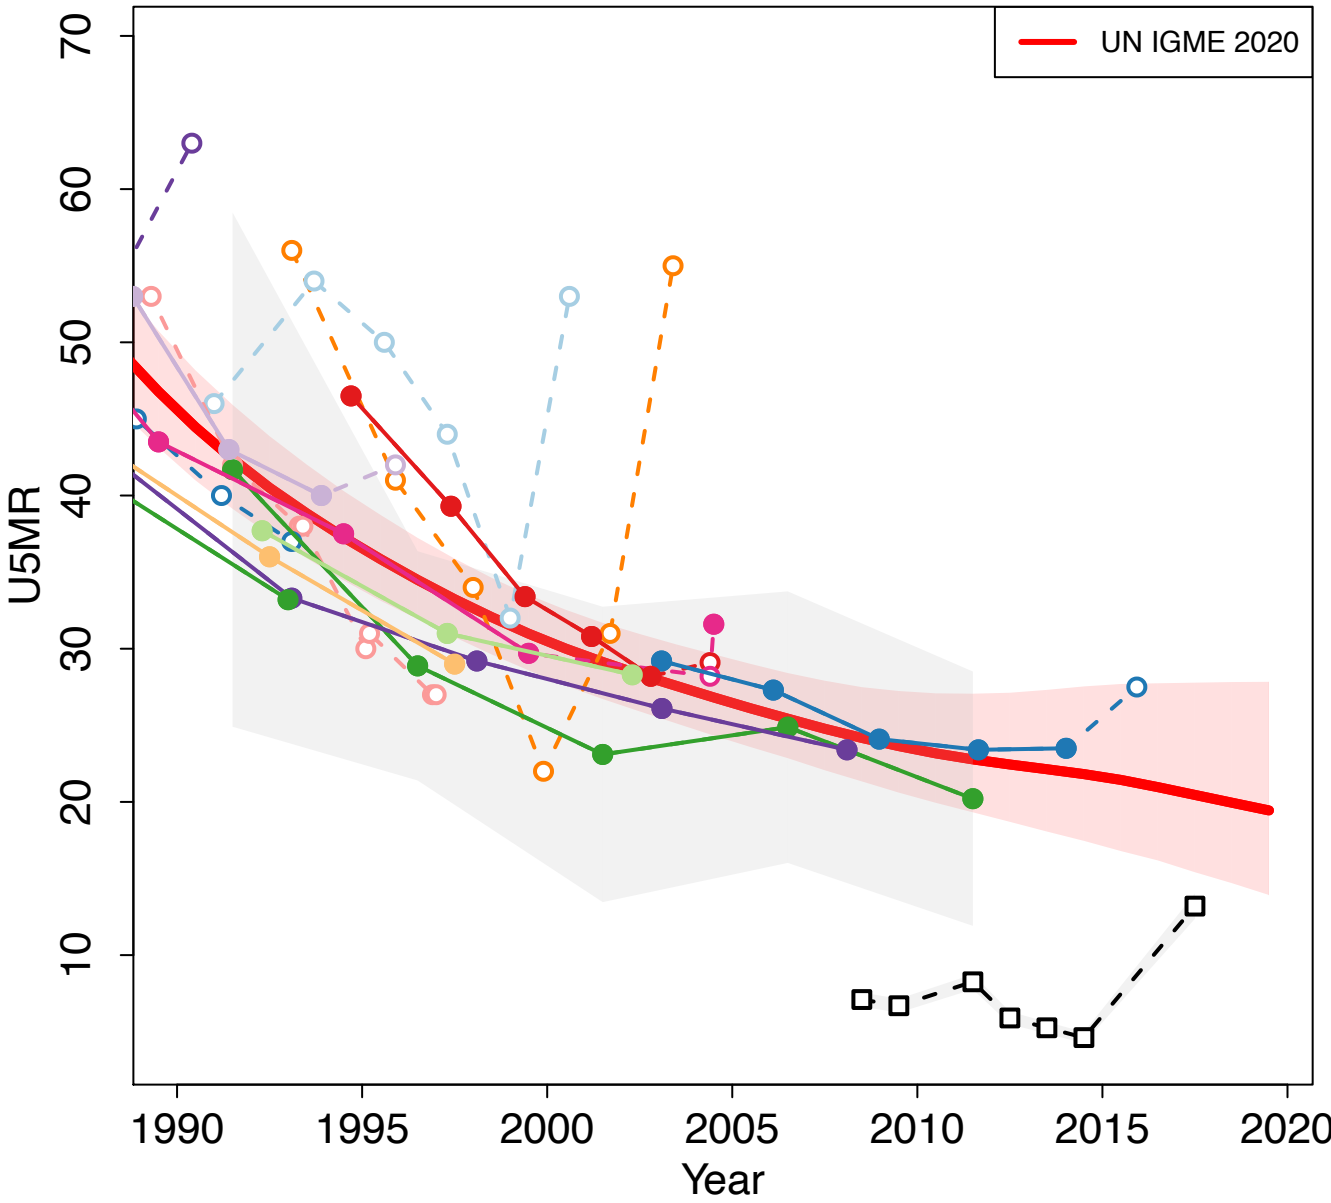

- FALCOT-survey 1992 (Others Indirect)
- Demographic Survey 1995 (Others Direct)
- Demographic Survey 1995 (Others Indirect)
- Census 1997 (Census Indirect)
- Health Survey 2000 (MICS Direct)
- Health Survey 2000 (Others Indirect)
- Demographic and Health Survey 2004 (Other DHS Direct)
- Demographic and Health Survey 2004 (Other DHS Indirect)
- PAPFAM Family Health Survey 2006 (Others Direct)
- PAPFAM Family Health Survey 2006 (Others Indirect)
- Census 2007 (Census Indirect)
- Multiple Indicator Cluster Survey-Family Health Survey 2010 (MICS Direct)
- Multiple Indicator Cluster Survey 2014 (MICS Direct)
- Census 2017 (Census Indirect)
- VR WHO

### Sudan

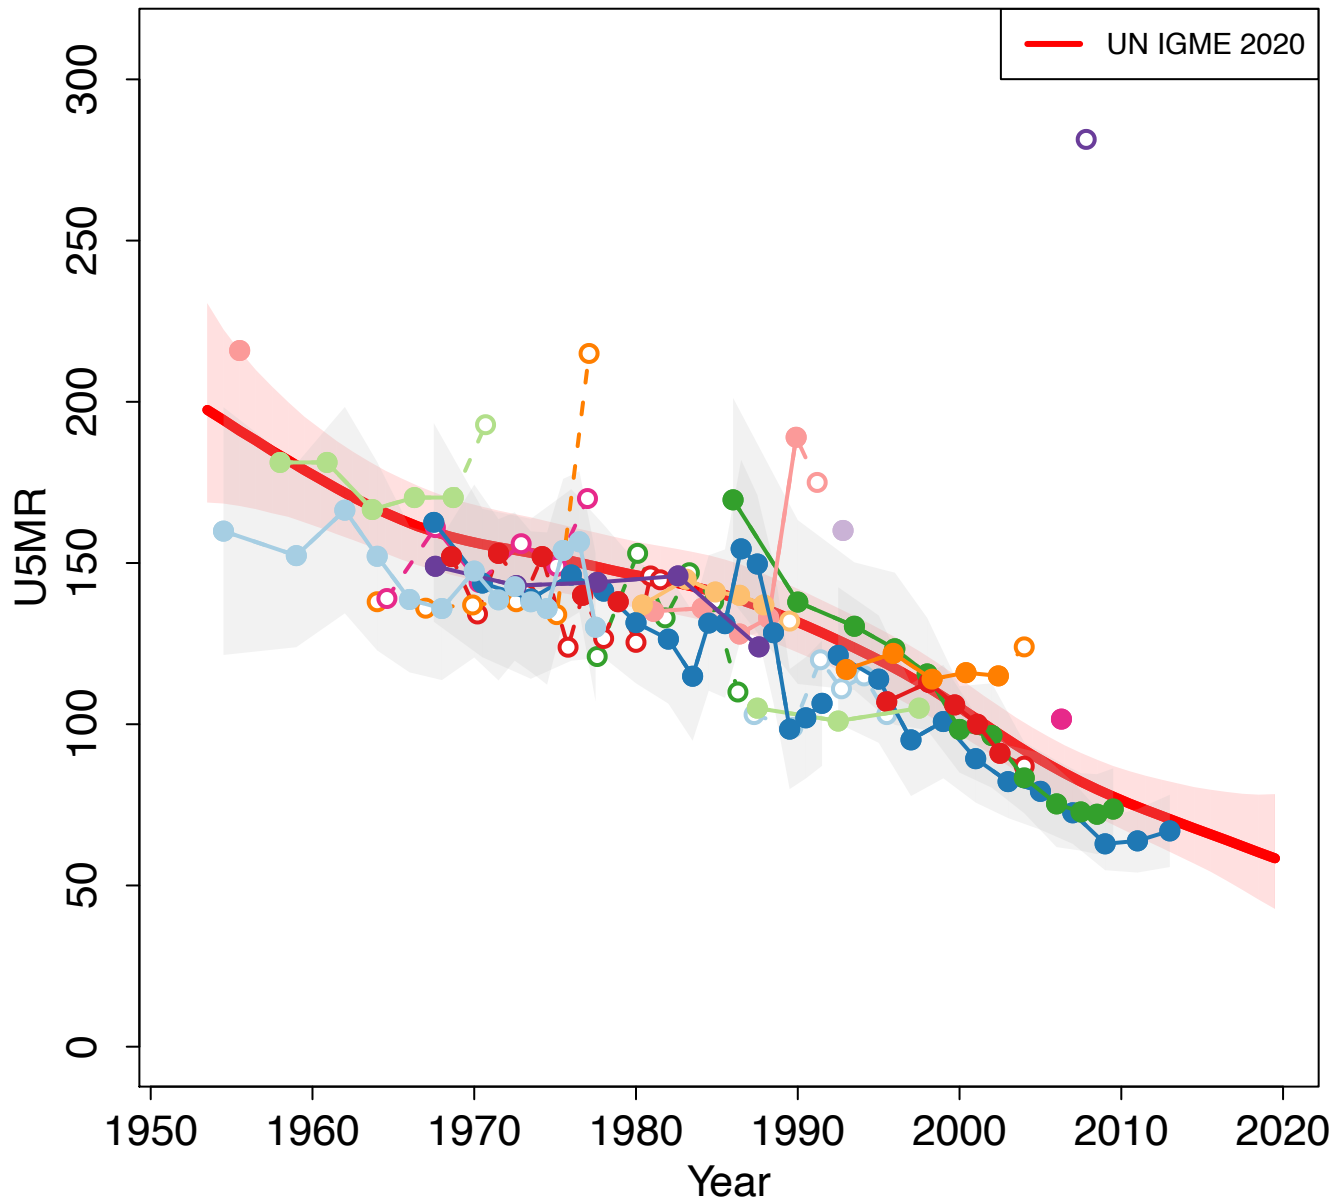

### Zoomed in

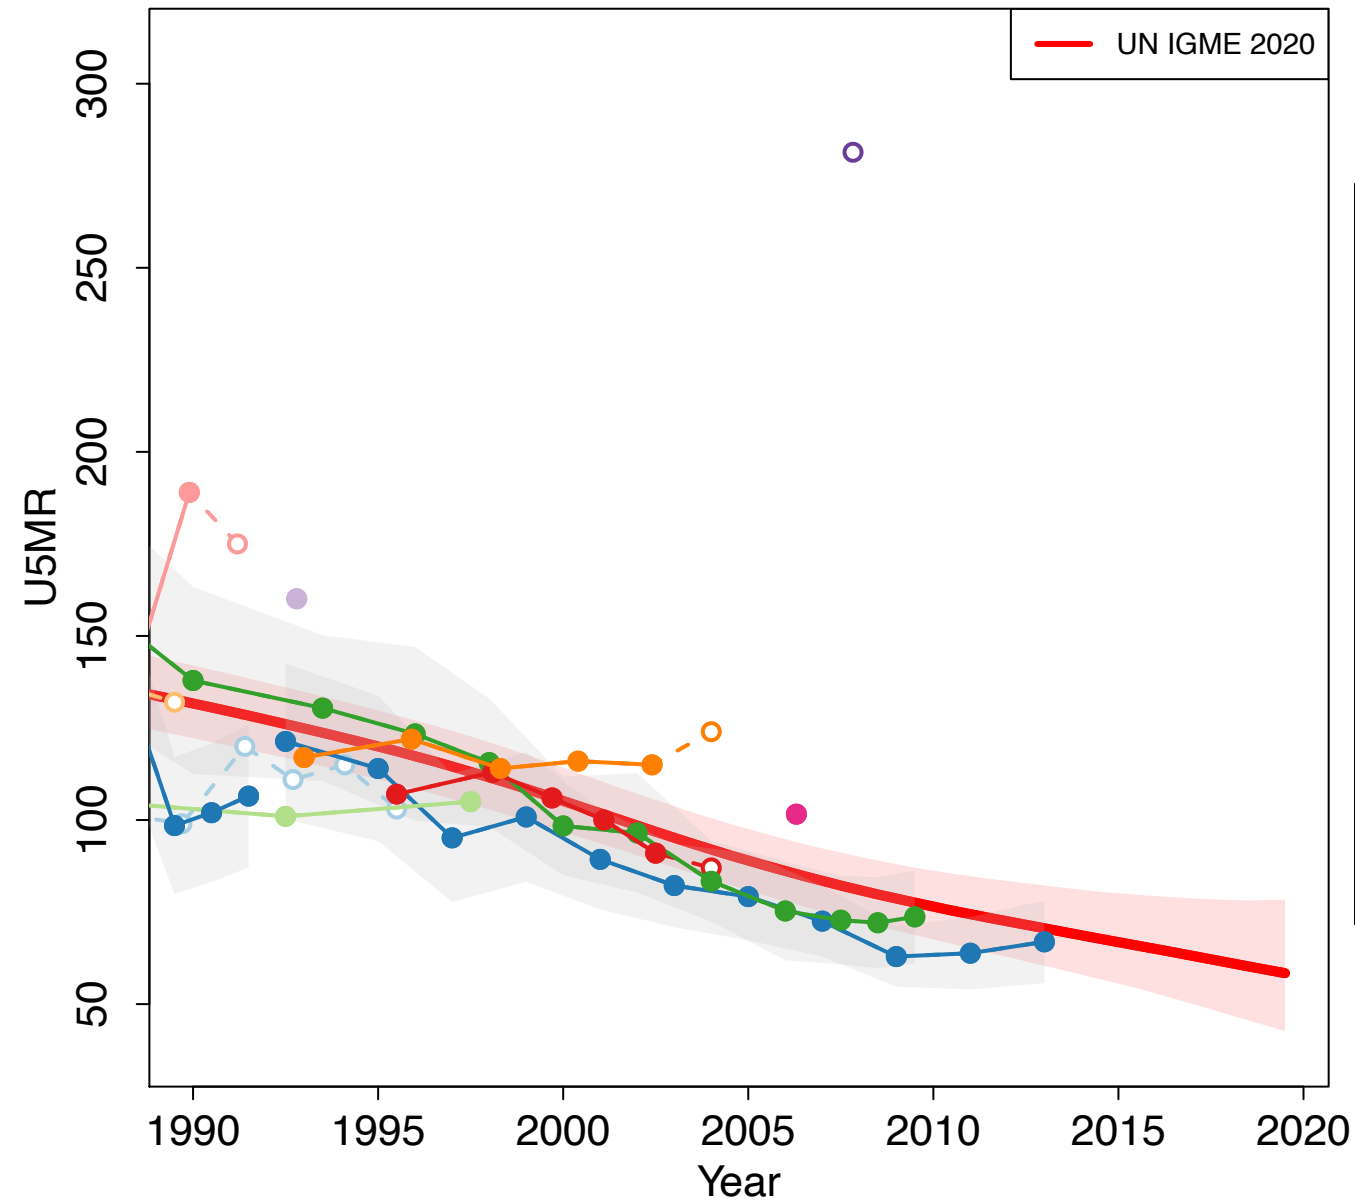

- Census 1955–1956 (Others Household Deaths)
- Census 1973 (Census Indirect)
- World Fertility Survey 1978–1979 (Other DHS Direct)
- World Fertility Survey (Household Survey) 1978–1979 (Other DHS Indirect)
- World Fertility Survey (Individual Survey) 1978–1979 (Other DHS Indirect)
- Census 1983 (Census Indirect)
- Demographic and Health Survey 1989–1990 (DHS Direct)
- Demographic and Health Survey 1989–1990 (DHS Indirect)
- PAPCHILD Maternal and Child Health Survey 1992 (Others Direct)
- Census 1993 (Others Household Deaths)
- Census 1993 (Census Indirect)
- Sudanese Maternal and Child Health Survey SMCHS 1993 (Others Indirect)
- Safe Motherhood Survey 1999 (Others Direct)
- Safe Motherhood Survey 1999 (Others Indirect)
- Sudan Household Health Survey 2006 (Others Household Deaths)
- Sudan Household Health Survey 2006 (Others Indirect)
- Census 2008 (Census Indirect)
- Census 2008 (Others Household Deaths)
- Multiple Indicator Cluster Survey 2010 (MICS Direct)
- Multiple Indicator Cluster Survey 2014 (MICS Direct)

### Suriname

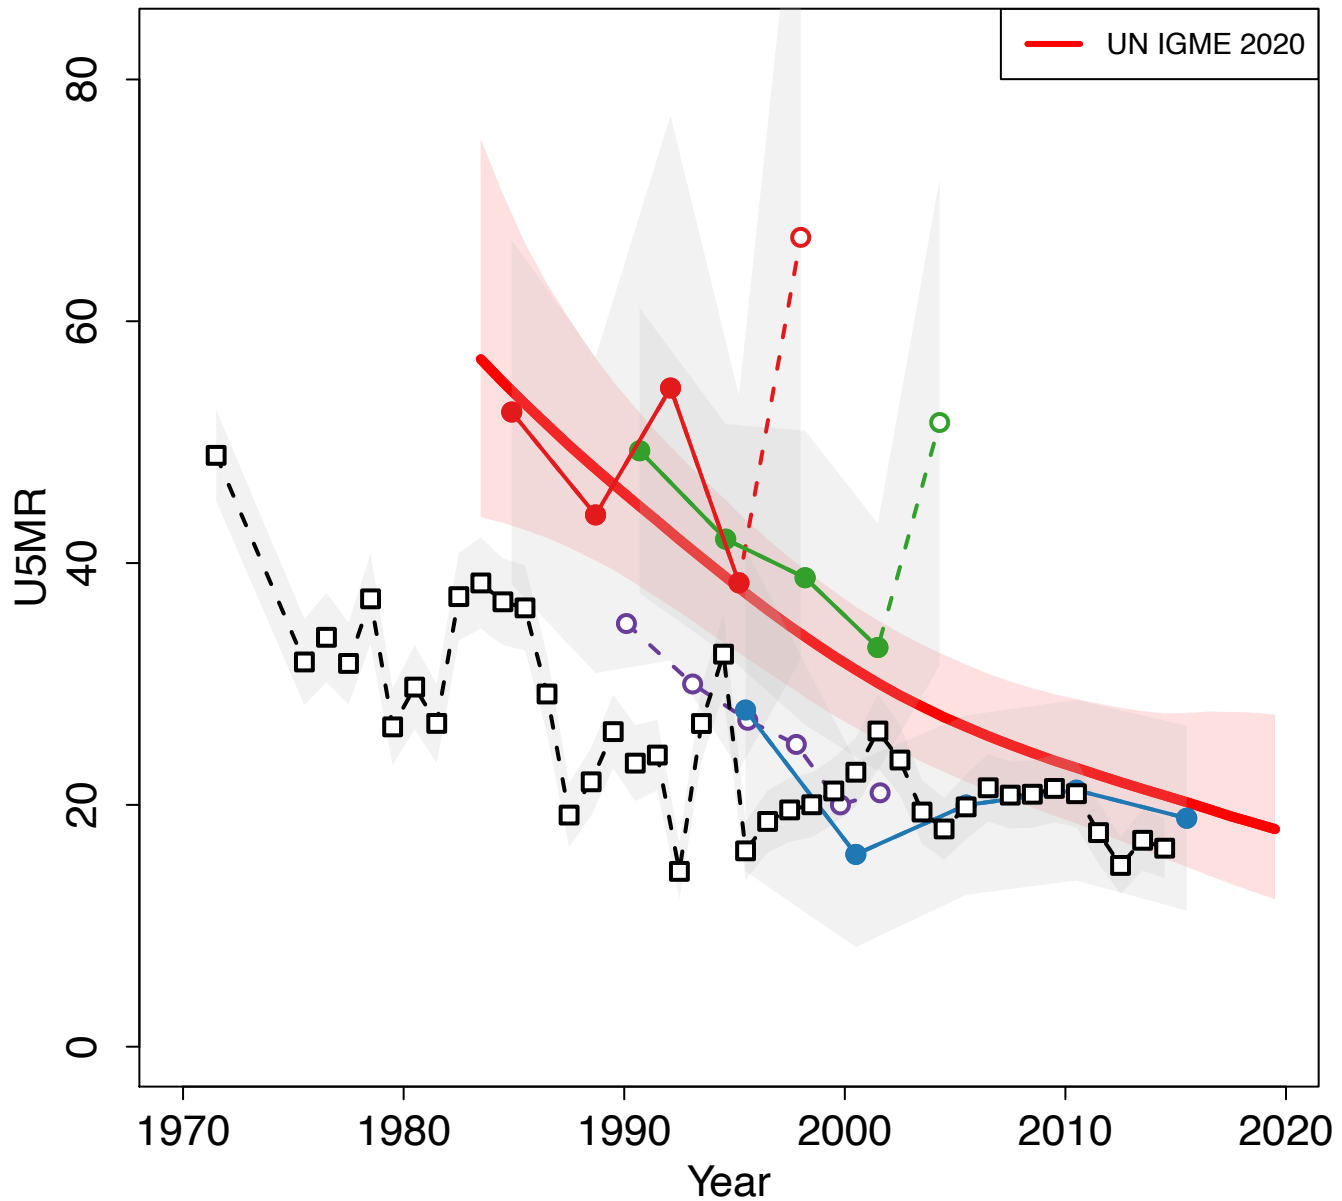

### Zoomed in

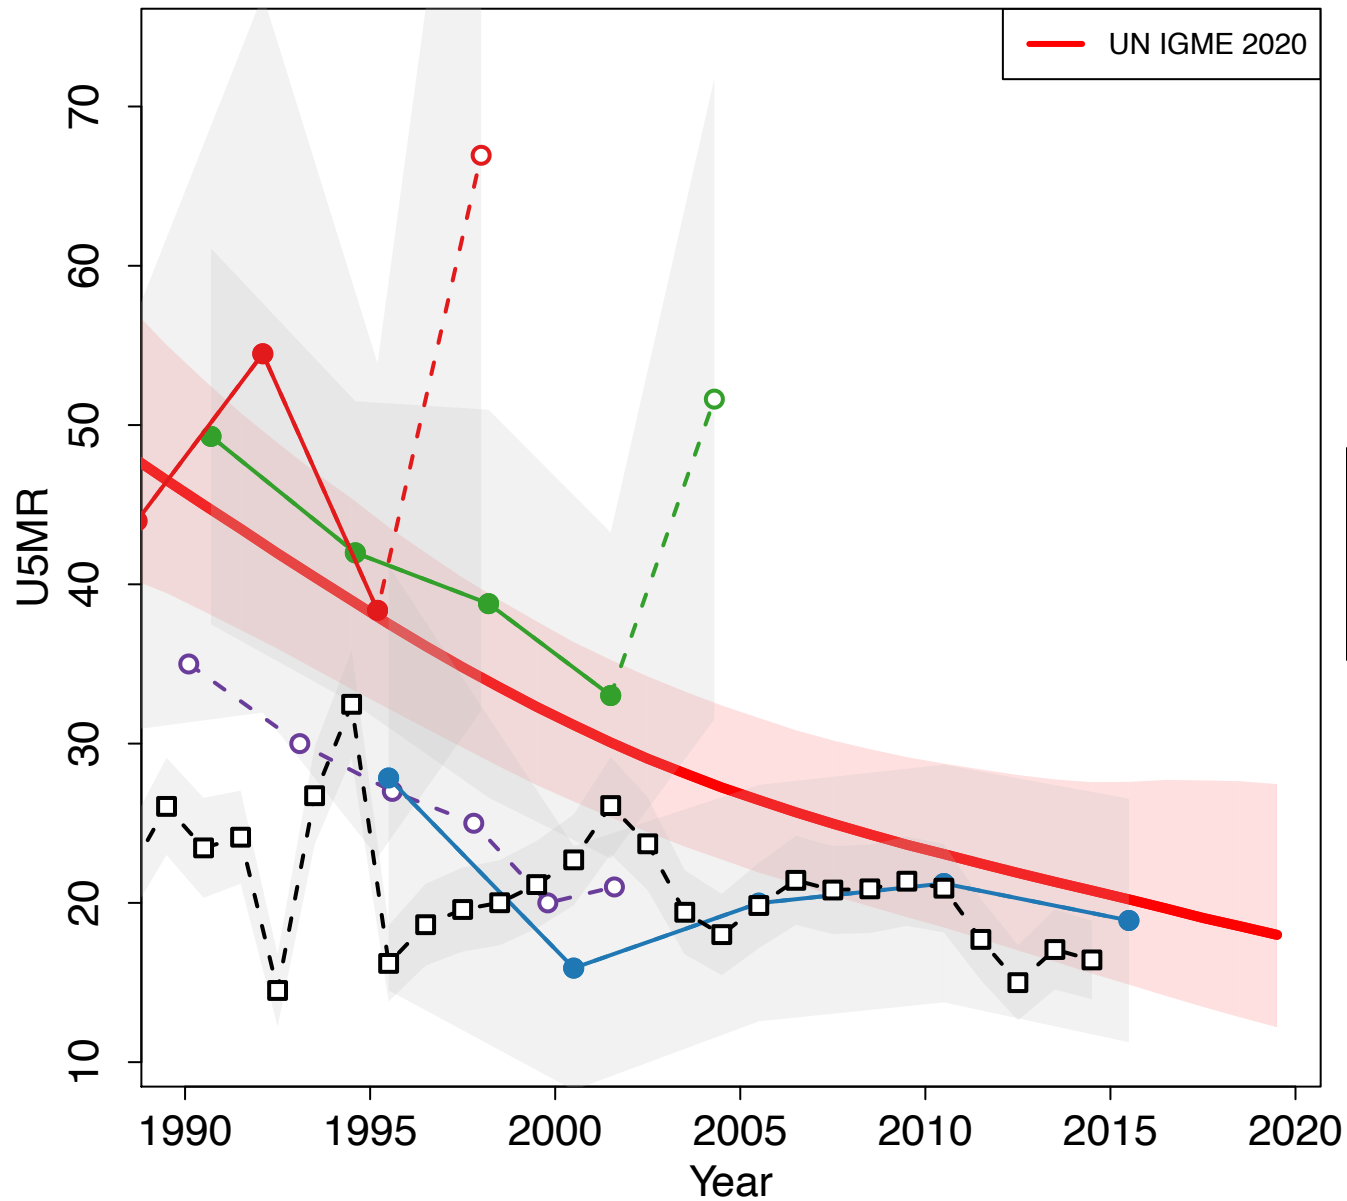

- Multiple Indicator Cluster Survey 1999–2000 (MICS Indirect)
- Census 2004 (Census Indirect)
- Multiple Indicator Cluster Survey 2006 (MICS Indirect)
- Multiple Indicator Cluster Survey 2018 (MICS Direct)
- VR WHO



### Eswatini

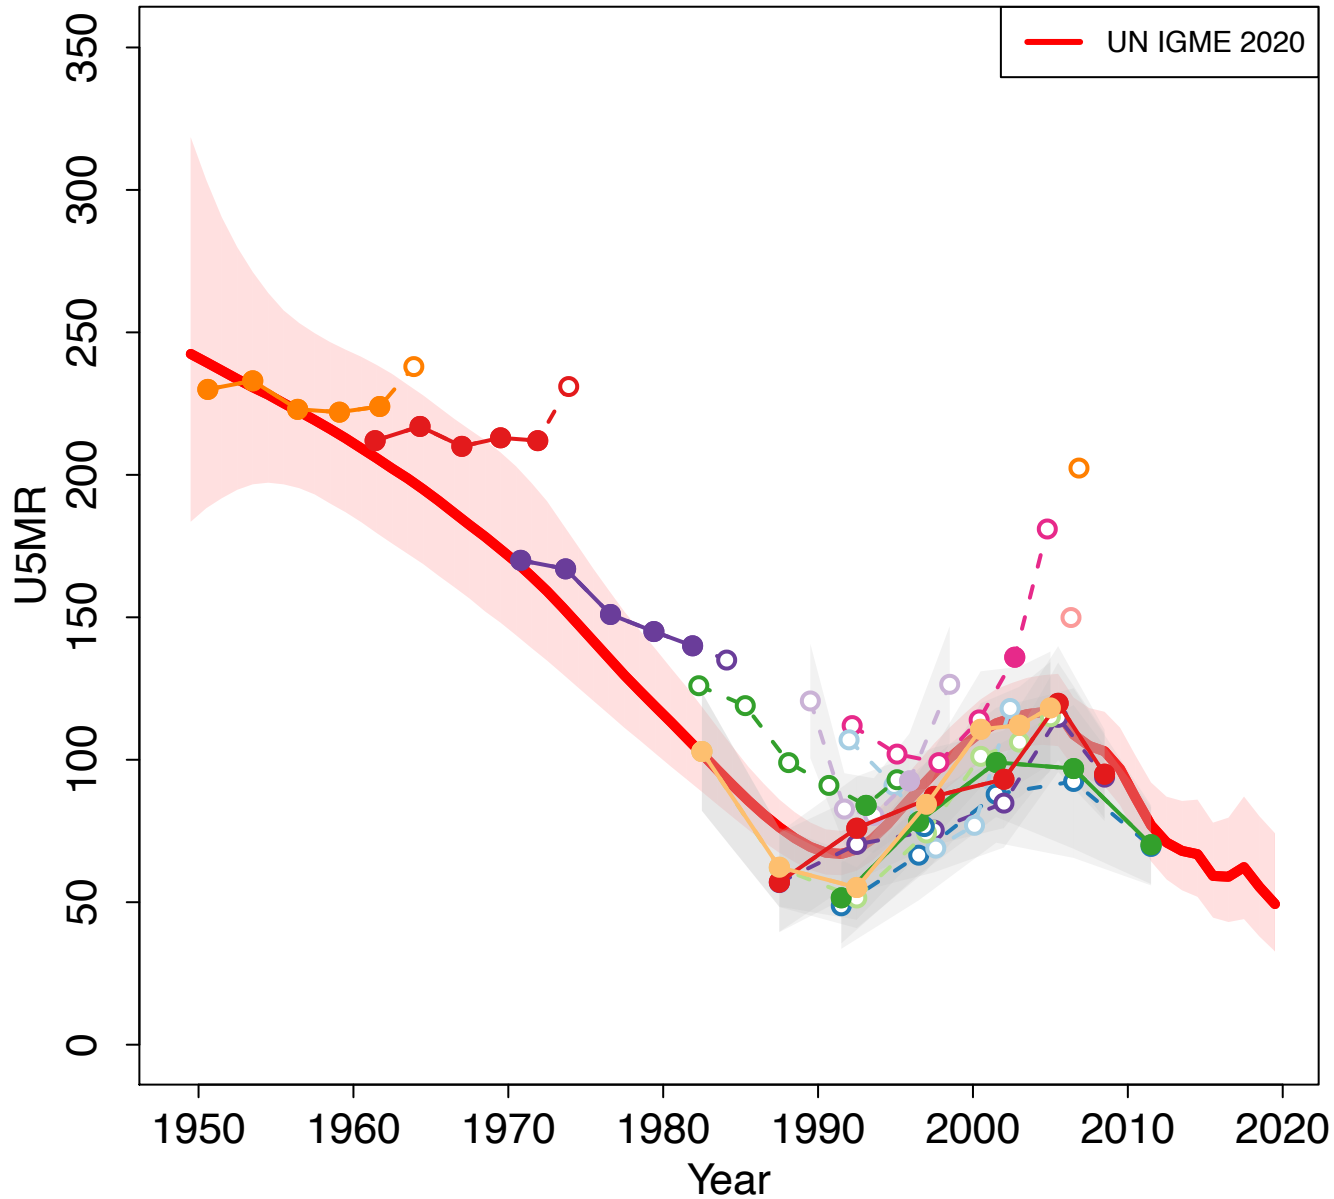

### Zoomed in

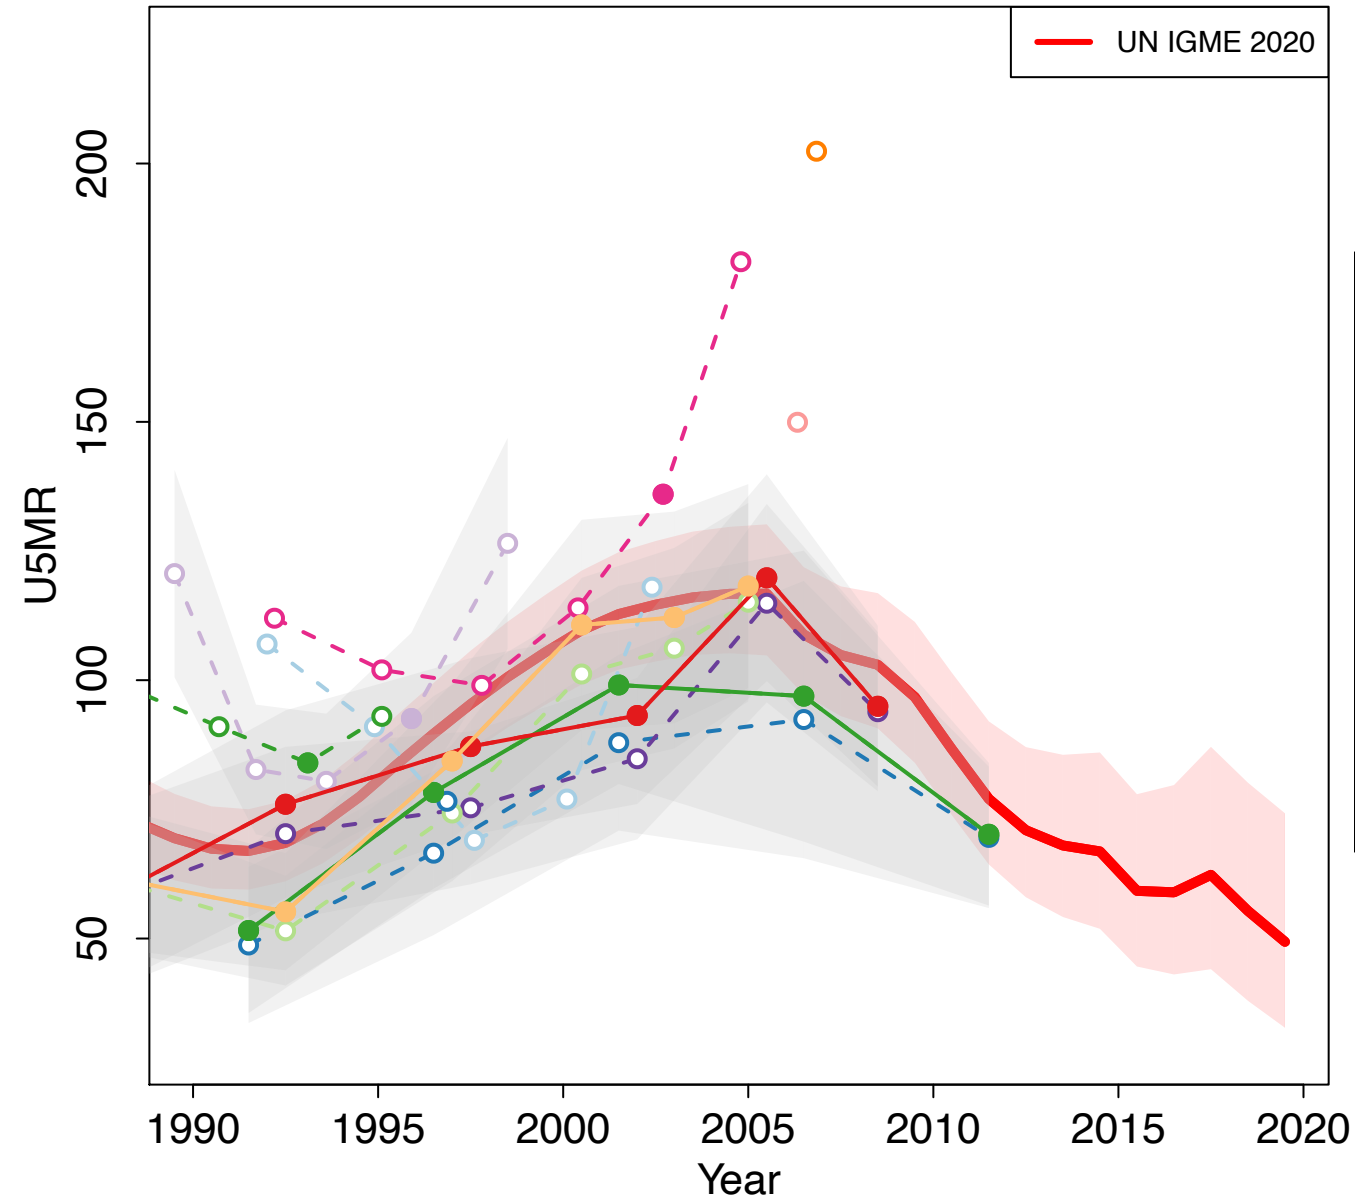

- Census 1966 (Census Indirect)
- Census 1976 (Census Indirect)
- Census 1986 (Census Indirect)
- Census 1997 (Census Indirect)
- Census 1997 (Others Household Deaths)
- Multiple Indicator Cluster Survey 1999–2000 (MICS Indirect)
- Demographic and Health Survey (MM adjusted) 2006–2007 (DHS Direct)
- Demographic and Health Survey 2006–2007 (Others Household Deaths)
- Demographic and Health Survey 2006–2007 (DHS Direct)
- Demographic and Health Survey 2006–2007 (DHS Indirect)
- Census 2007 (Census Indirect)
- Census 2007 (Others Household Deaths)
- Multiple Indicator Cluster Survey (MM adjusted) 2010 (MICS Direct)
- Multiple Indicator Cluster Survey 2010 (MICS Direct)
- Multiple Indicator Cluster Survey (MM adjusted) 2014 (MICS Direct)
- Multiple Indicator Cluster Survey 2014 (MICS Direct)

### Sweden

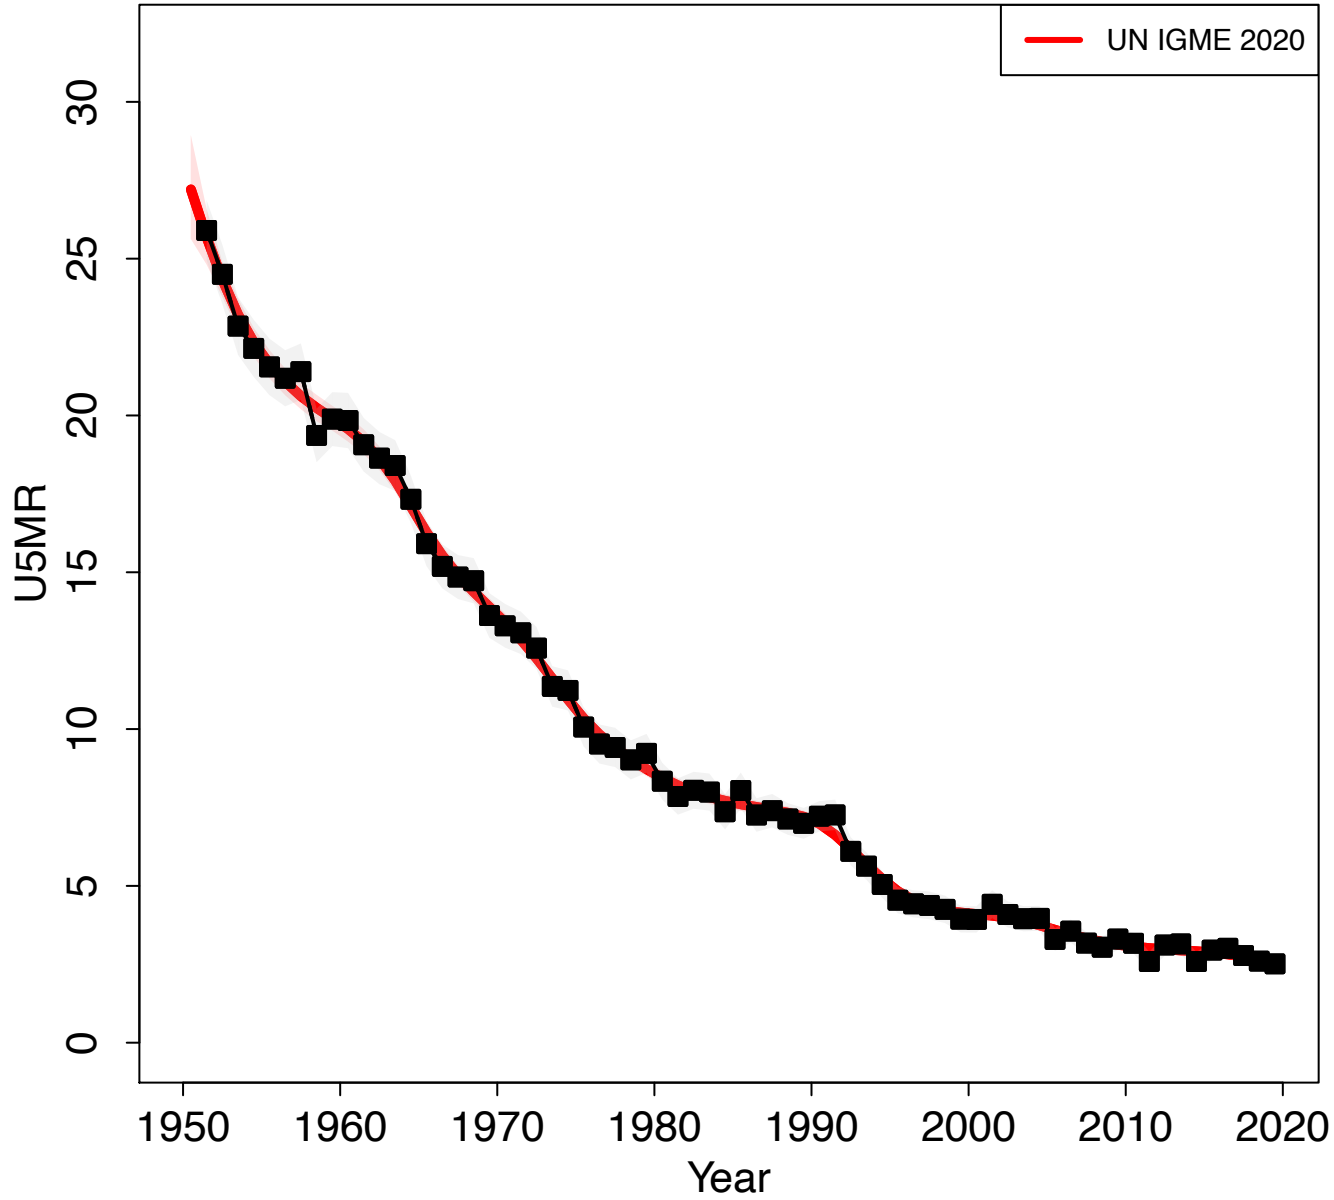

### Zoomed in

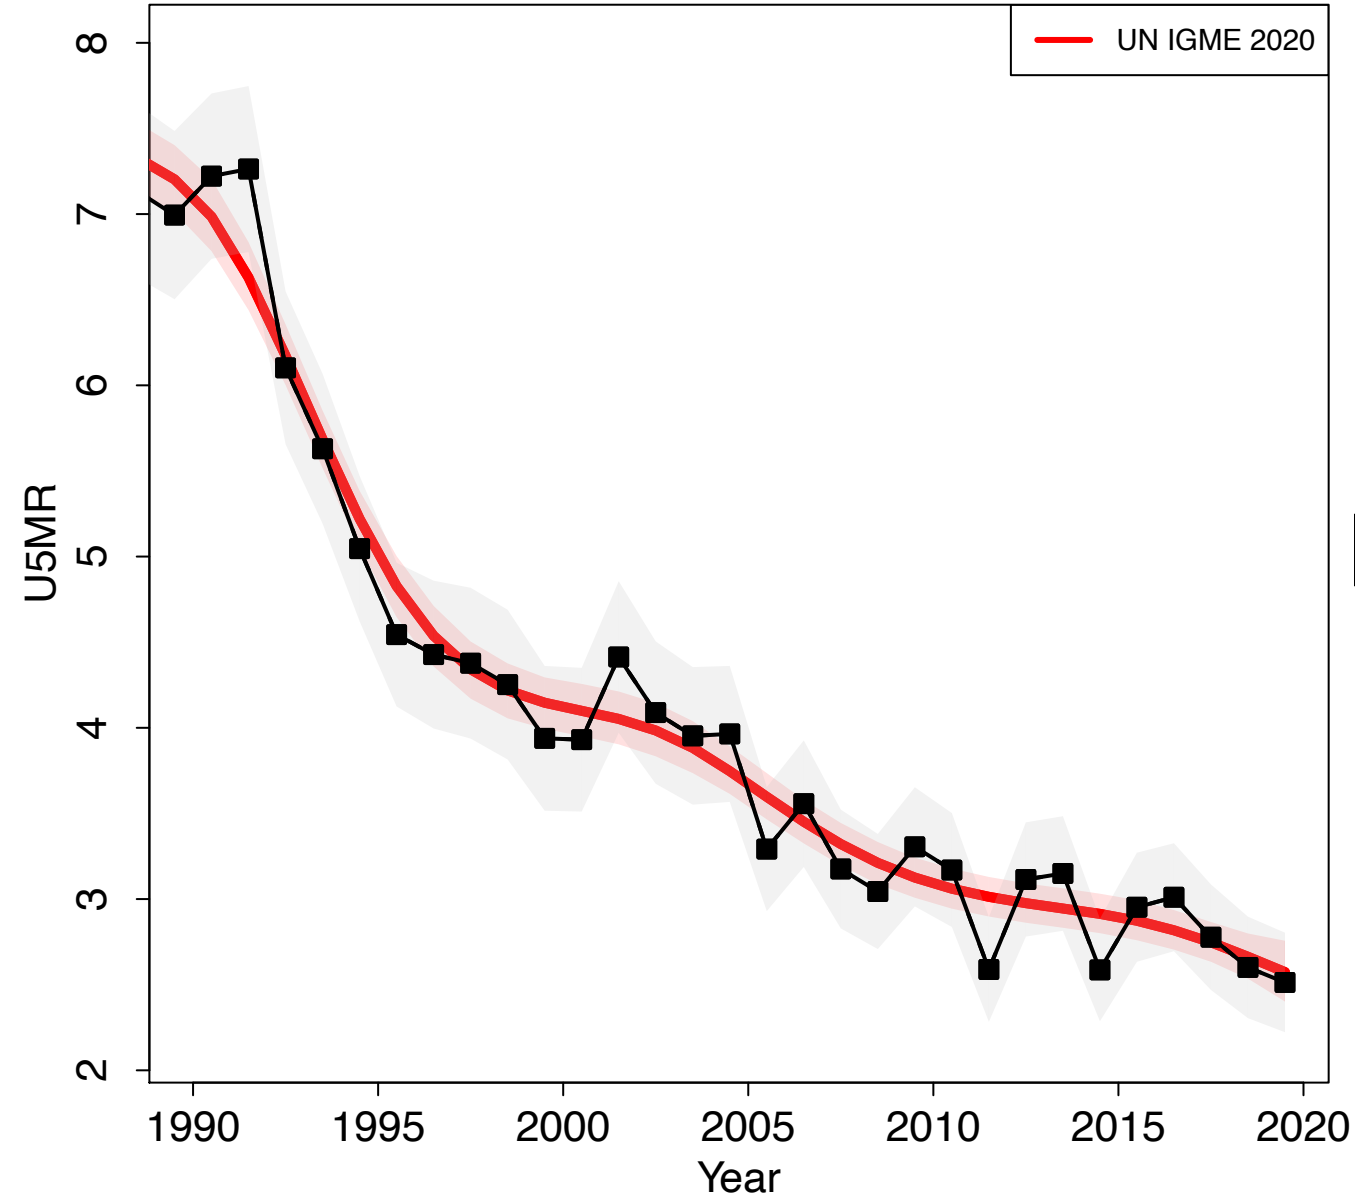

### Switzerland

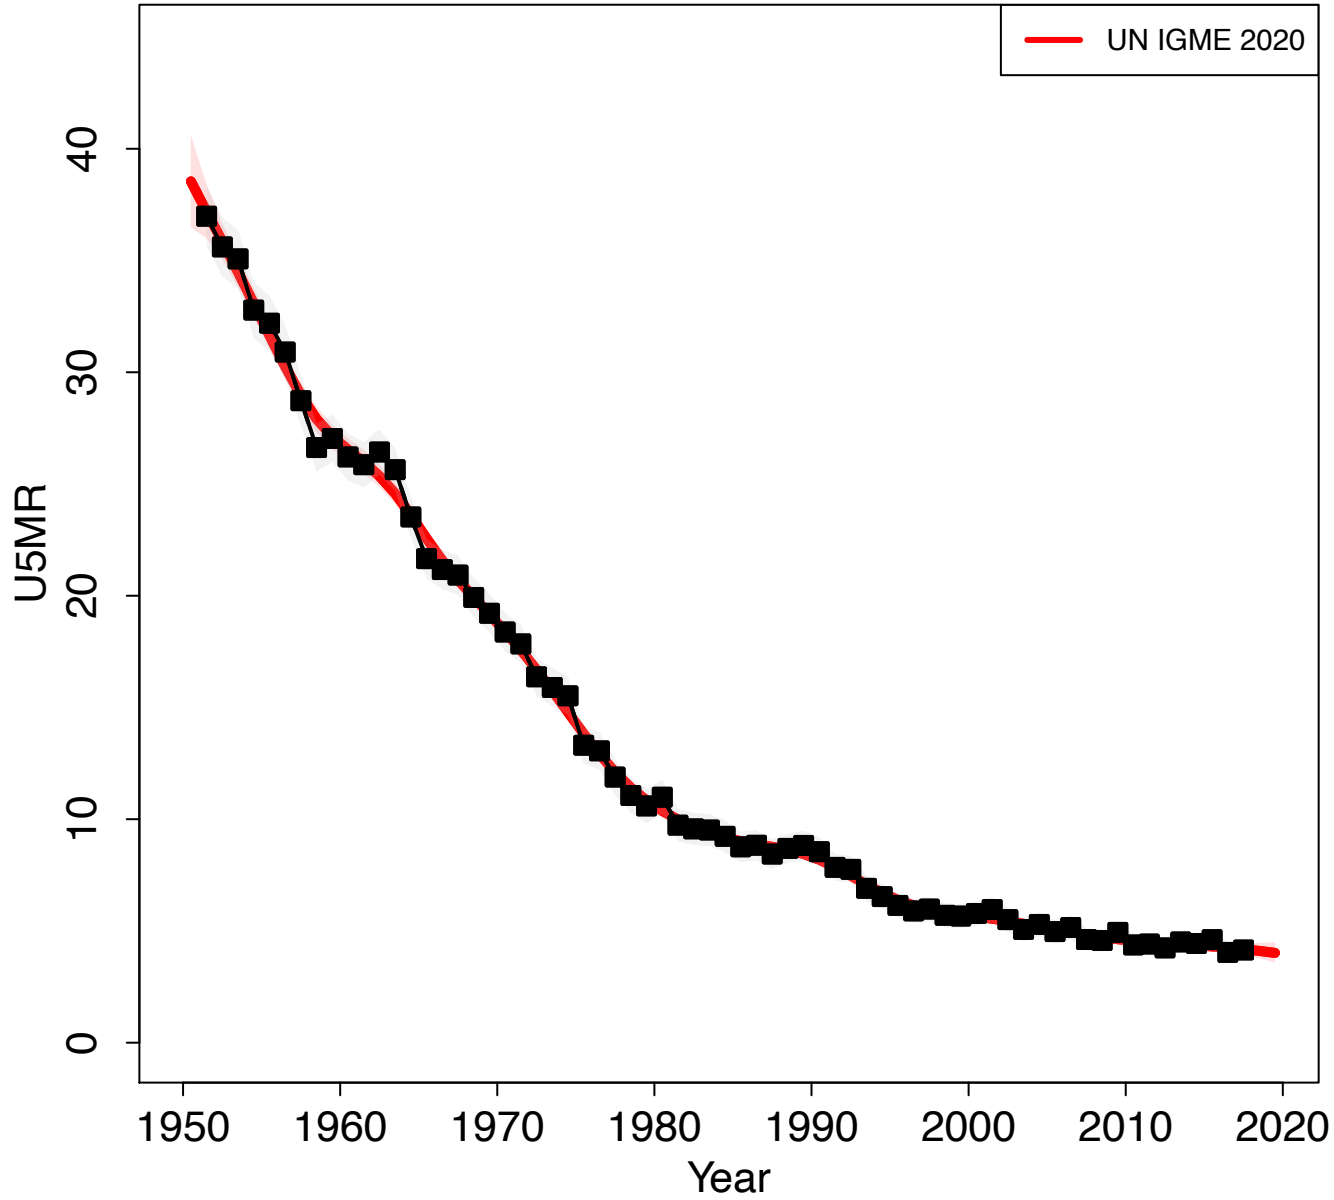

### Zoomed in

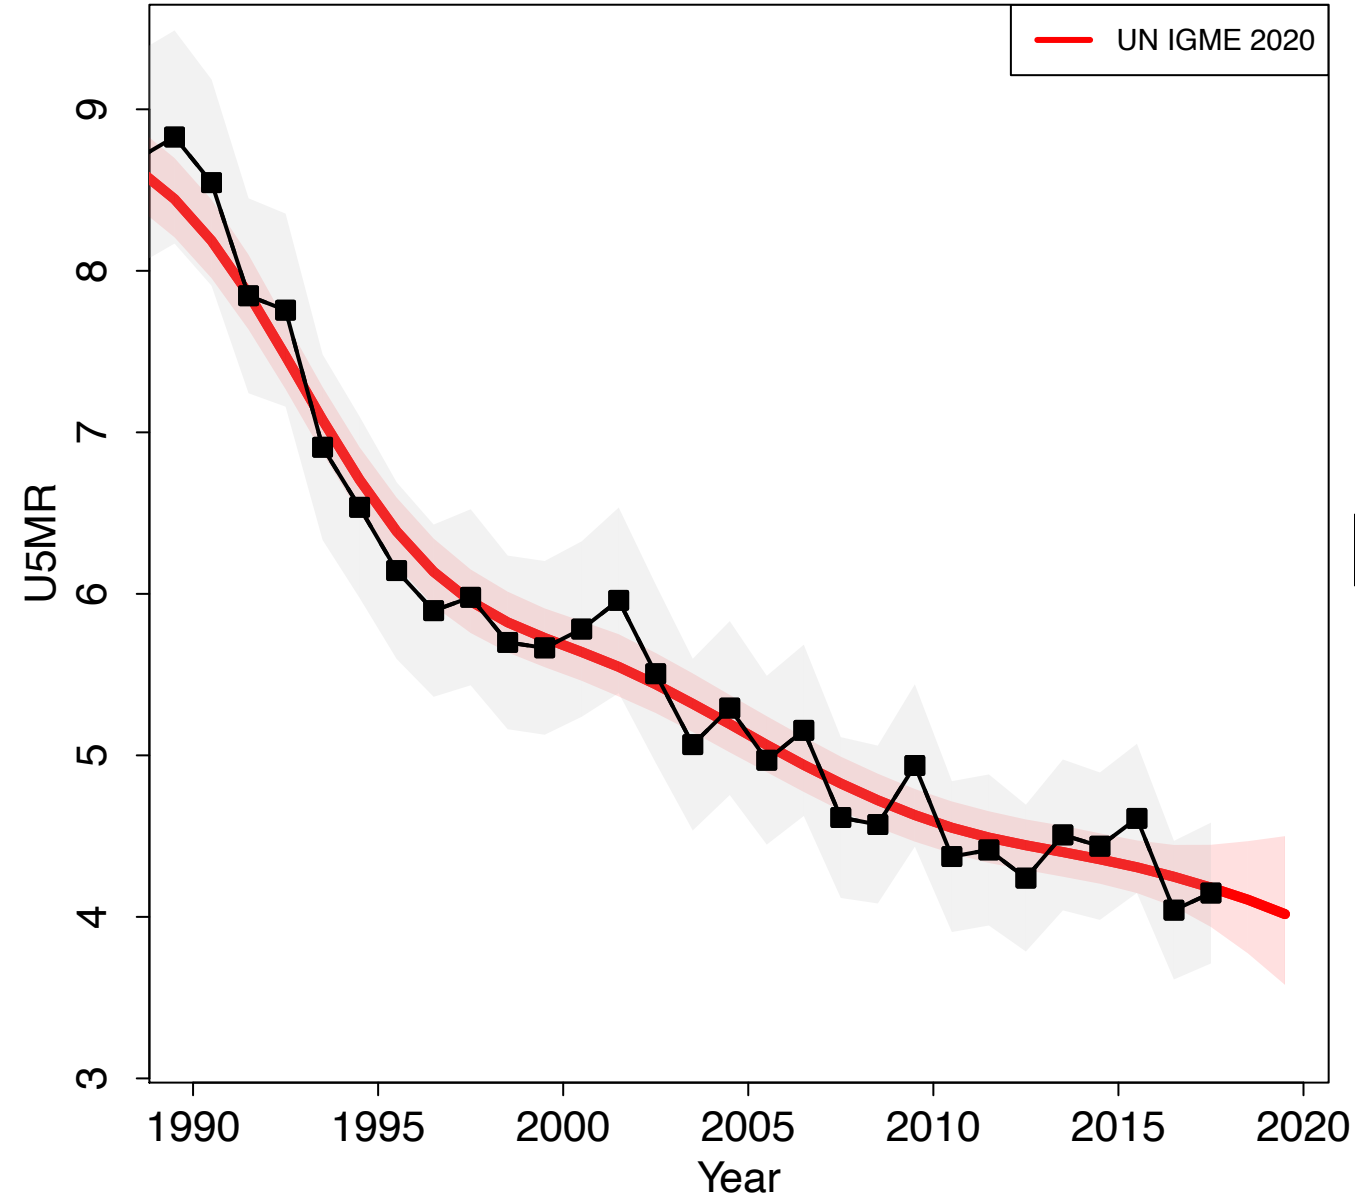

### Syrian Arab Republic

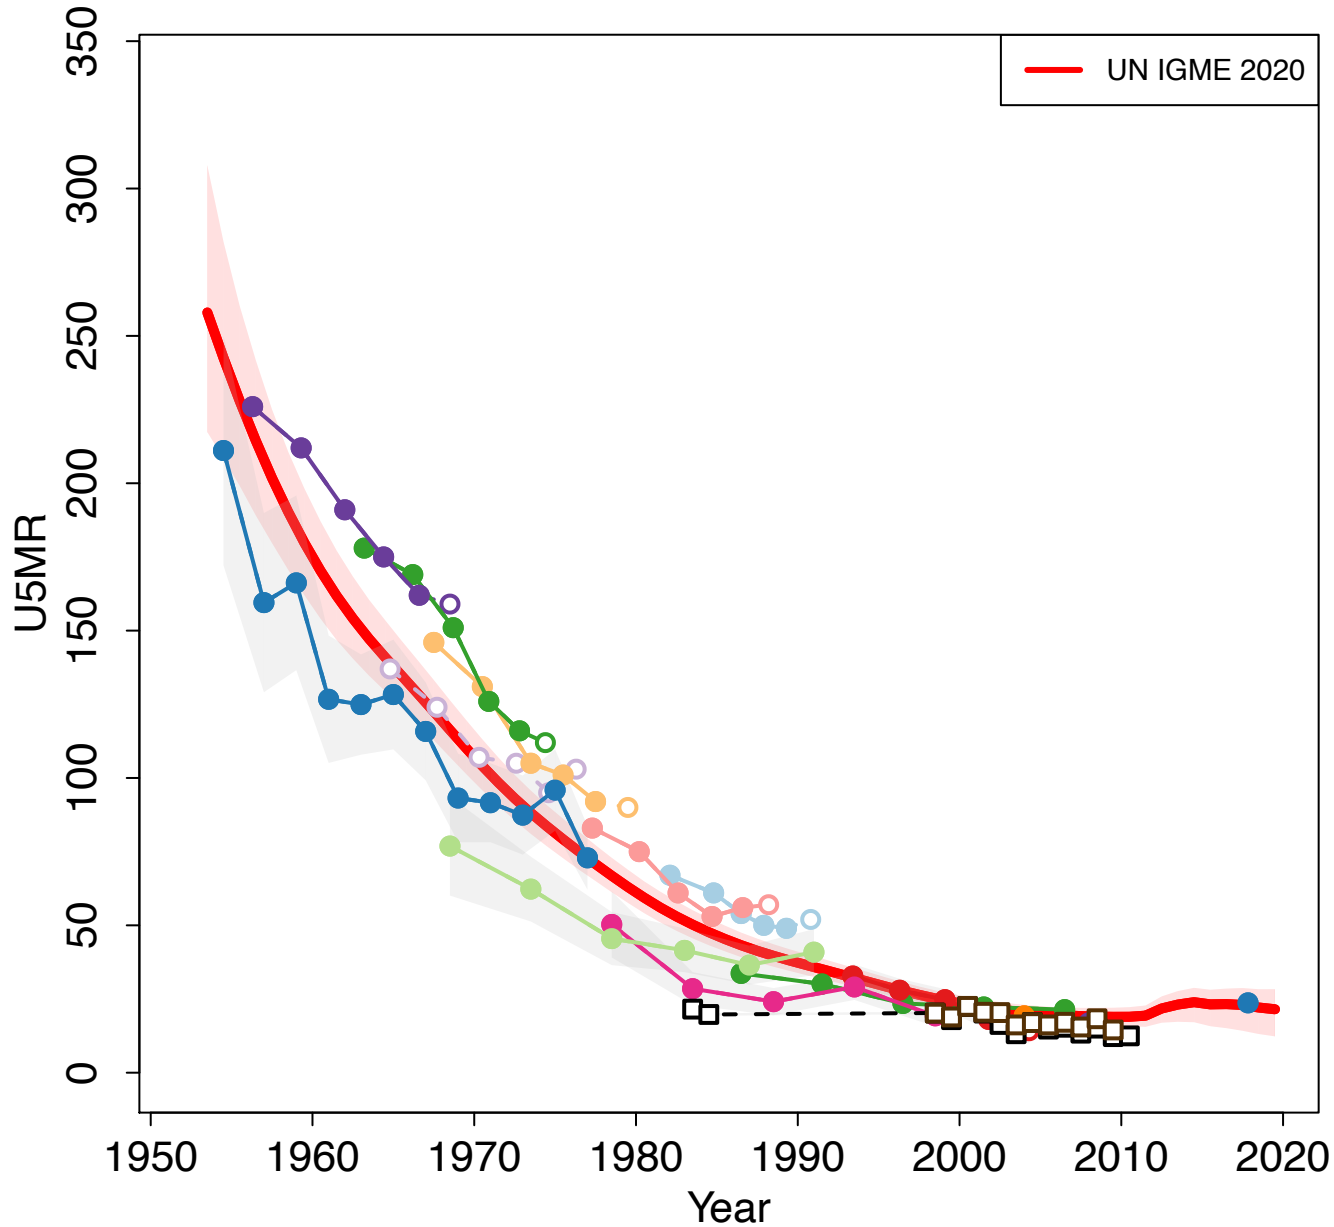

### Zoomed in

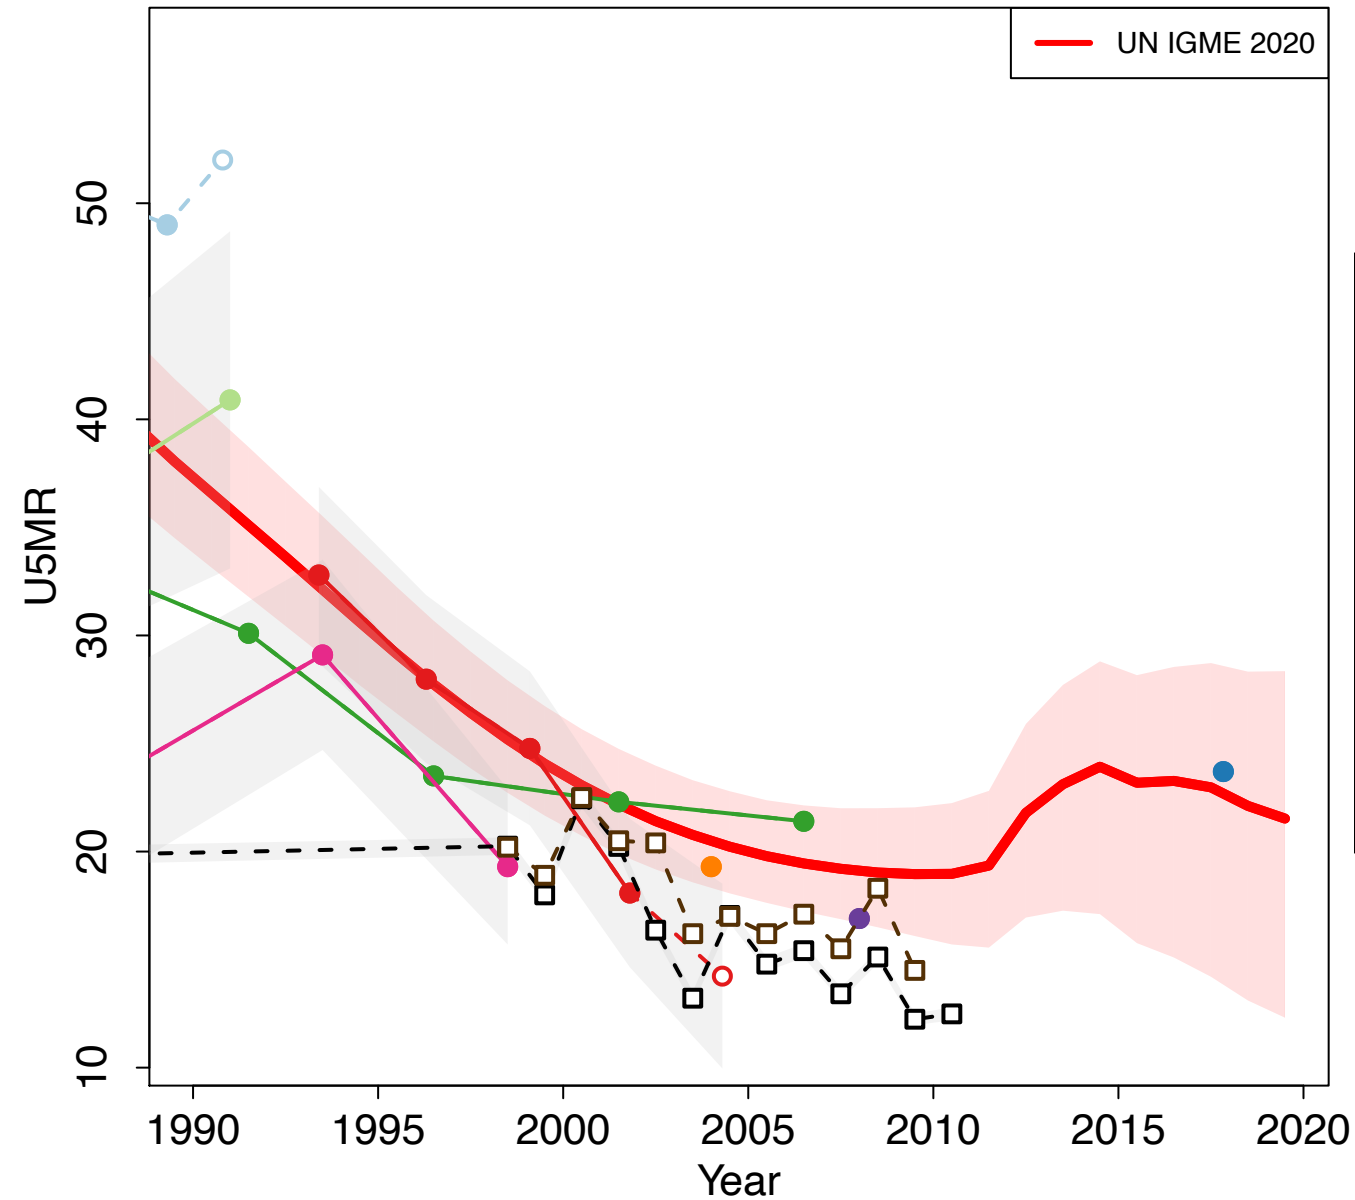

- Census 1970 (Census Indirect)
- Census 1976 (Census Indirect)
- World Fertility Survey 1978 (Other DHS Direct)
- World Fertility Survey 1978 (Other DHS Indirect)
- Census 1981 (Census Indirect)
- EPI/CDD and Child Mortality Survey 1990 (Others Indirect)
- PAPCHILD Maternal and Child Health Survey 1993 (Others Direct)
- Census 1994 (Census Indirect)
- PAPFAM Family Health Survey 2001 (Others Direct)
- Population and Housing Census 2004 (Others Household Deaths)
- Multiple Indicator Cluster Survey 2006 (MICS Indirect)
- Health survey for causes of child deaths 2007–2008 (Others Household Deaths)
- PAPFAM Family Health Survey 2009 (Others Direct)
- Health survey for causes of child deaths 2017–2018 (Others Household Deaths)
- VR Vital Registration/hospitals/funeral offices Data
- VR WHO

### Tajikistan

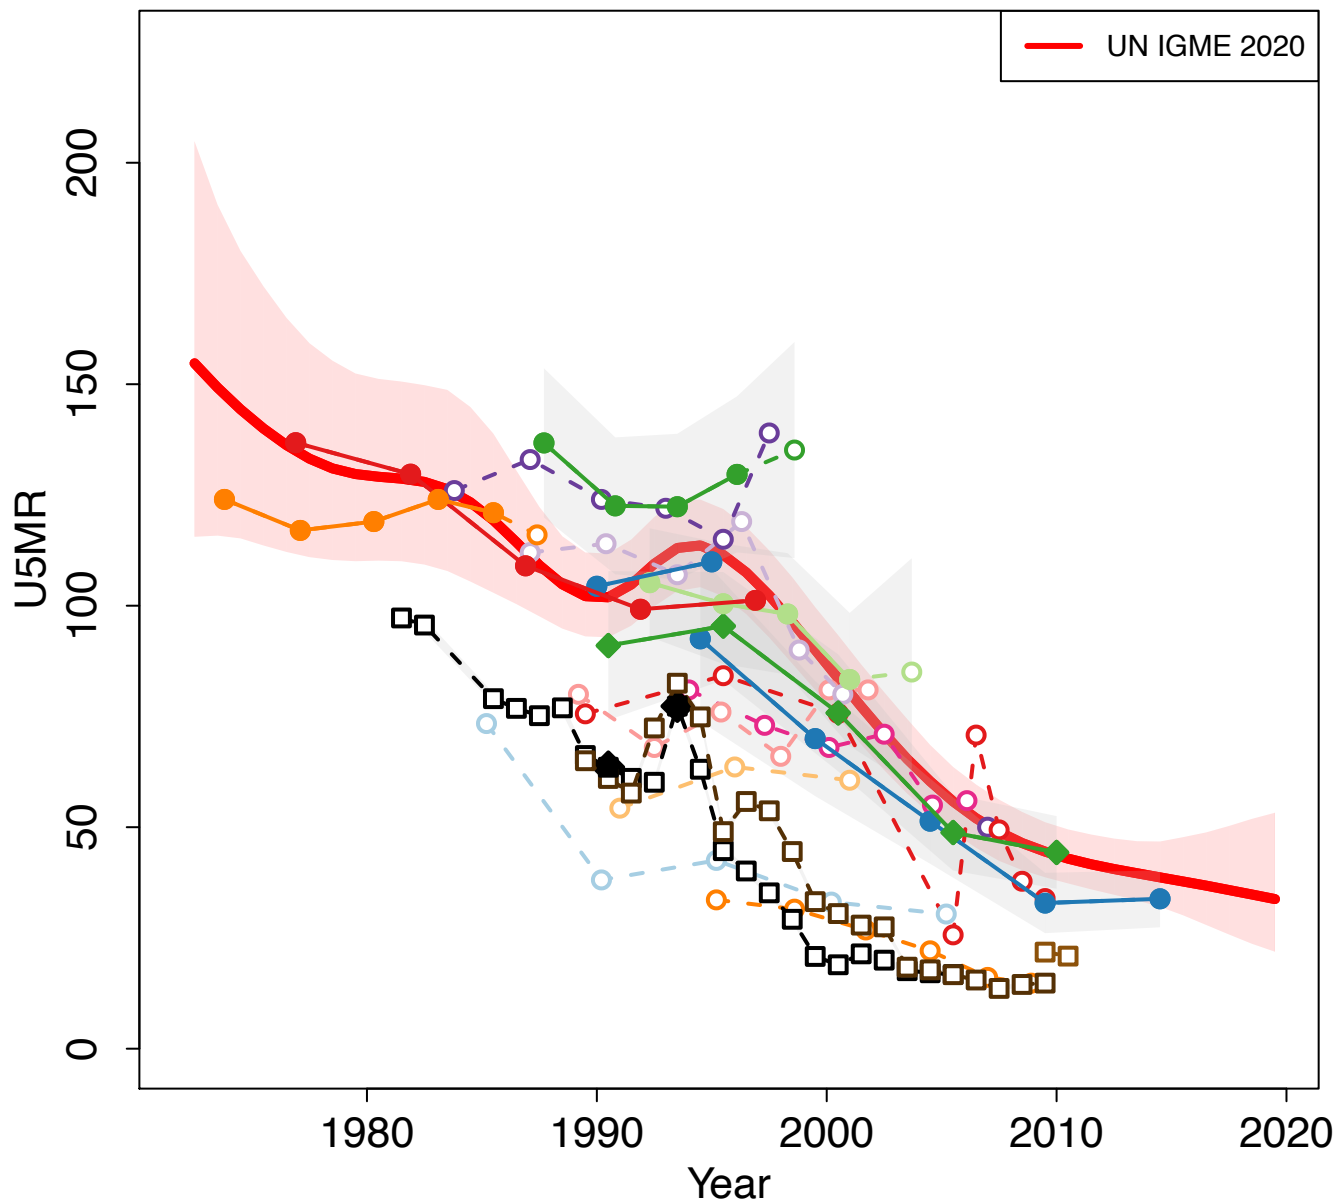

### Zoomed in

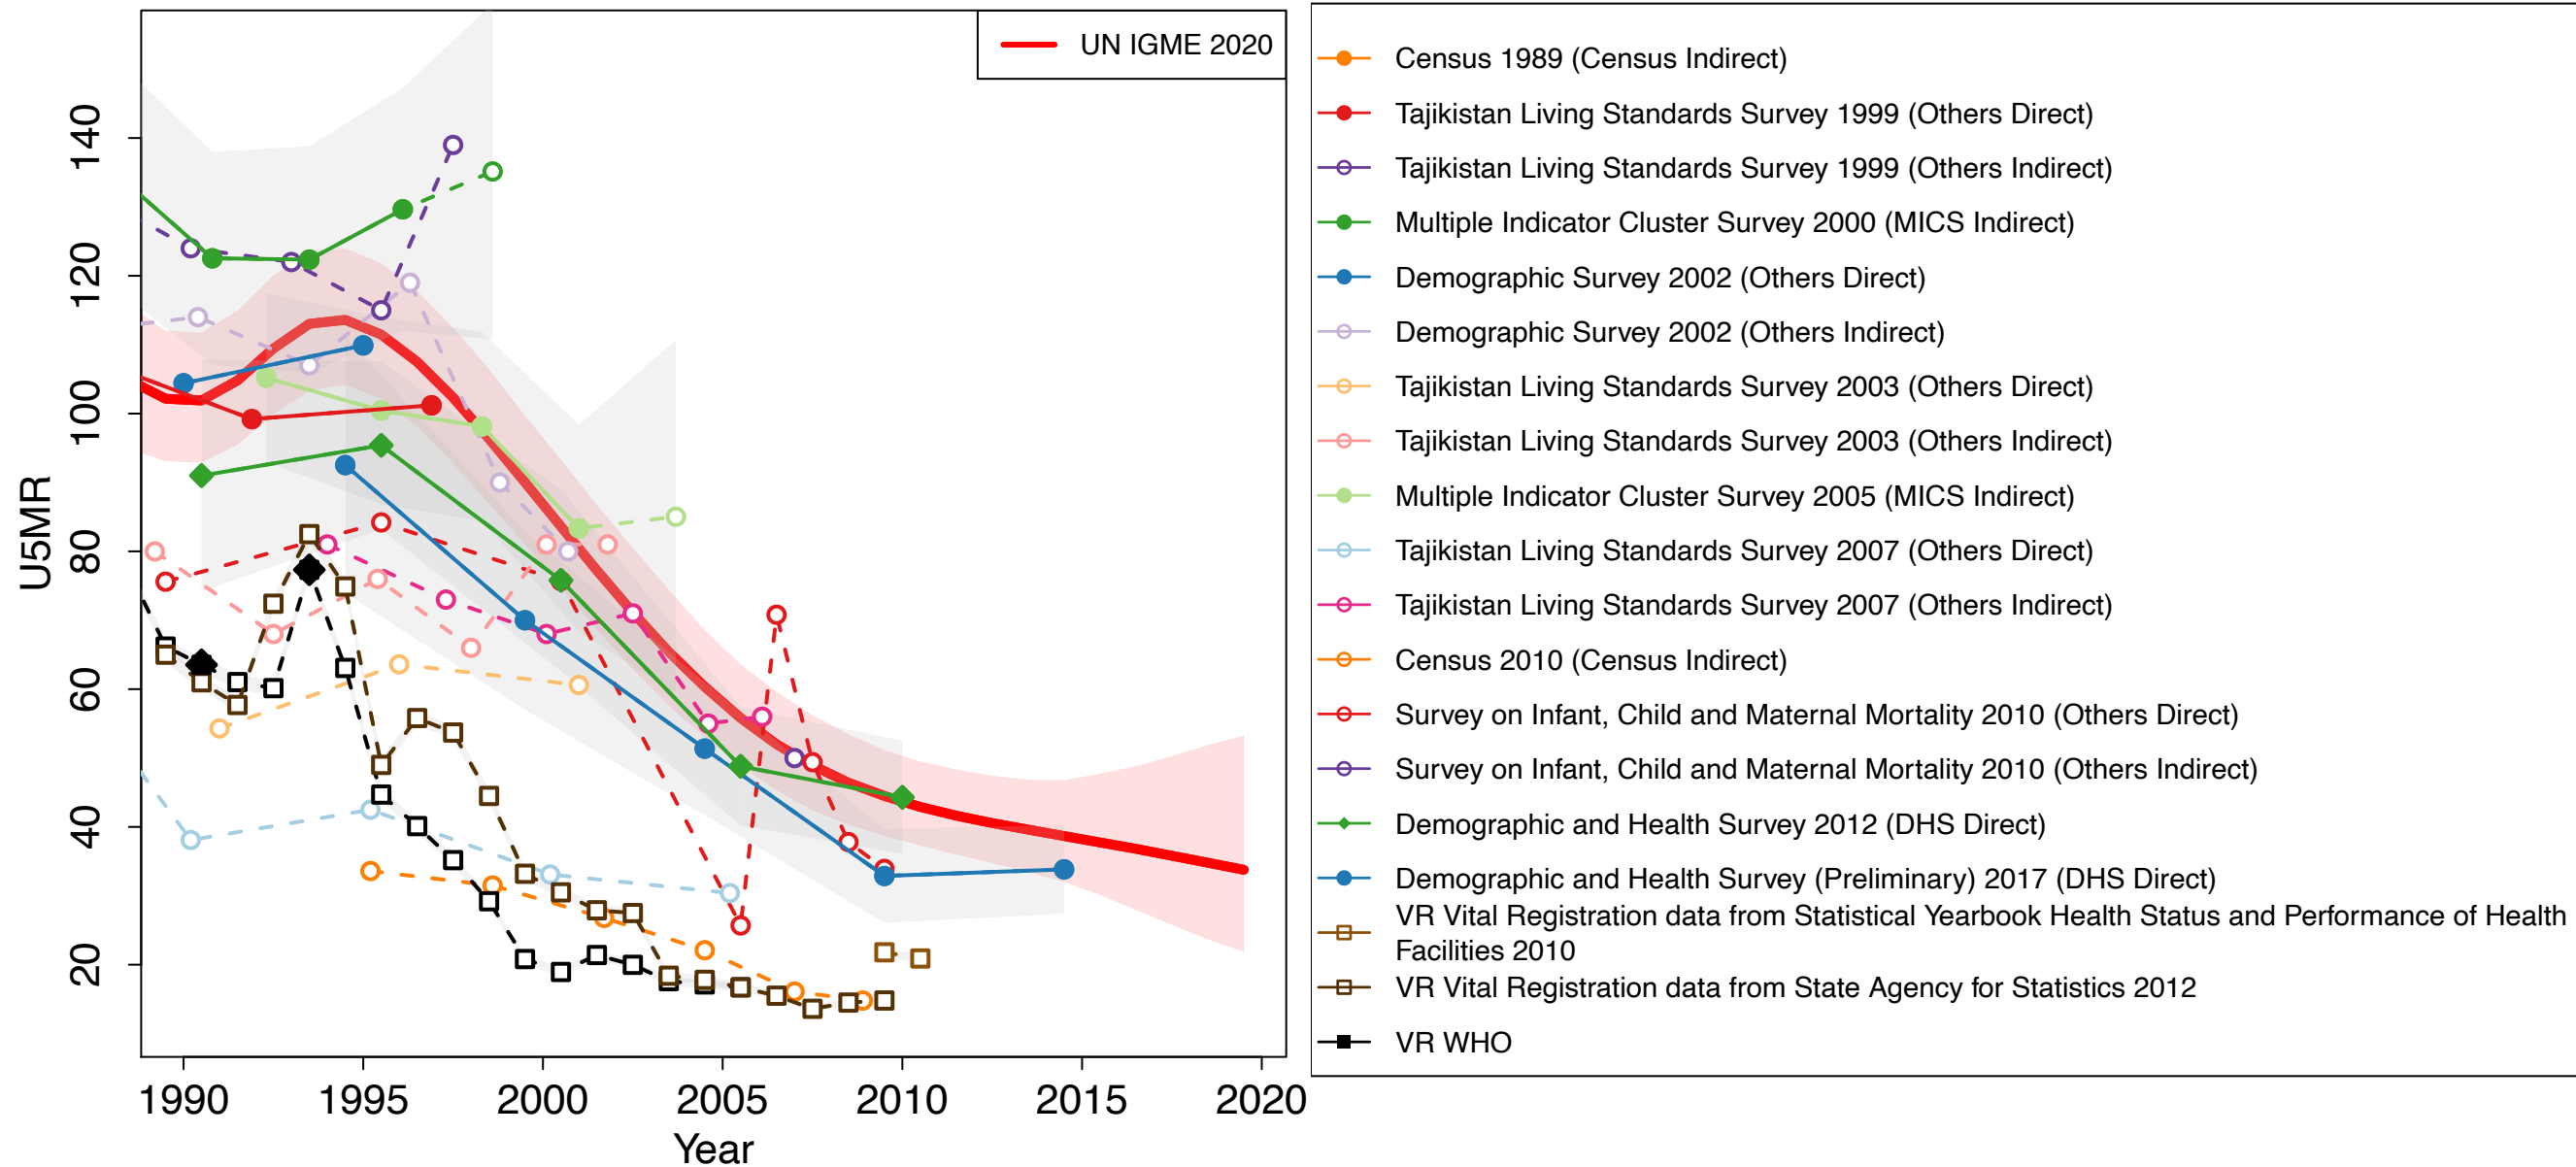

- Census 1989 (Census Indirect)
- Tajikistan Living Standards Survey 1999 (Others Direct)
- Tajikistan Living Standards Survey 1999 (Others Indirect)
- Multiple Indicator Cluster Survey 2000 (MICS Indirect)
- Demographic Survey 2002 (Others Direct)
- Demographic Survey 2002 (Others Indirect)
- Tajikistan Living Standards Survey 2003 (Others Direct)
- Tajikistan Living Standards Survey 2003 (Others Indirect)
- Multiple Indicator Cluster Survey 2005 (MICS Indirect)
- Tajikistan Living Standards Survey 2007 (Others Direct)
- Tajikistan Living Standards Survey 2007 (Others Indirect)
- Census 2010 (Census Indirect)
- Survey on Infant, Child and Maternal Mortality 2010 (Others Direct)
- Survey on Infant, Child and Maternal Mortality 2010 (Others Indirect)
- ◆ Demographic and Health Survey 2012 (DHS Direct)
- Demographic and Health Survey (Preliminary) 2017 (DHS Direct)
- VR Vital Registration data from Statistical Yearbook Health Status and Performance of Health Facilities 2010
- VR Vital Registration data from State Agency for Statistics 2012
- VR WHO

# United Republic of Tanzania

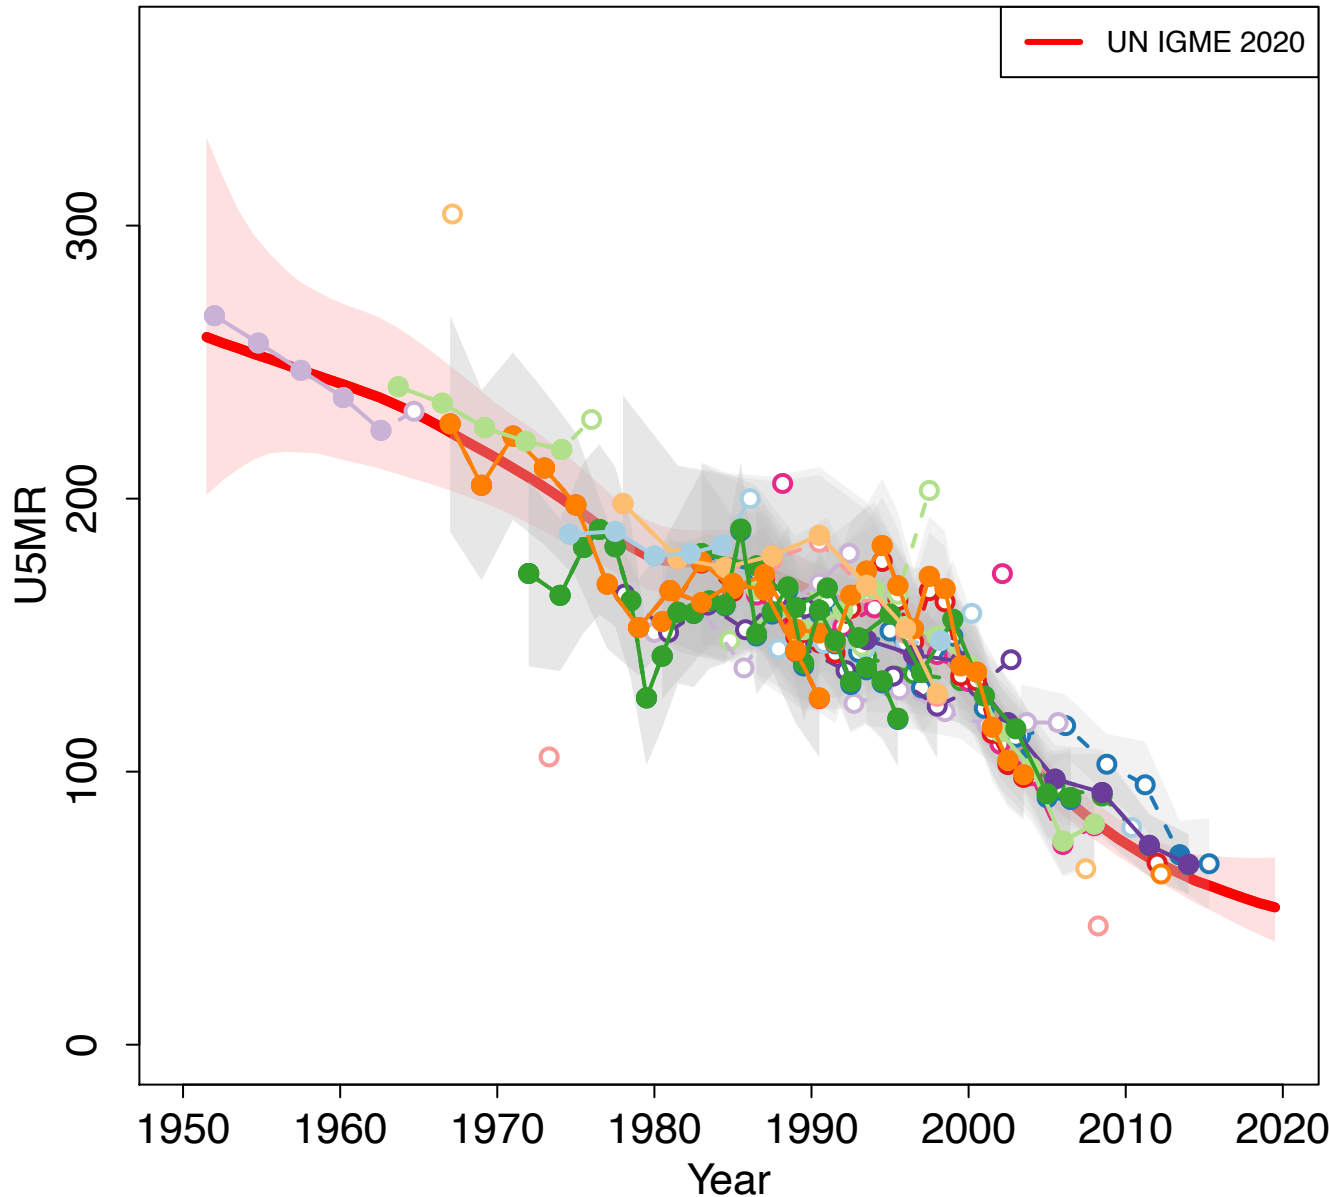

# Zoomed in

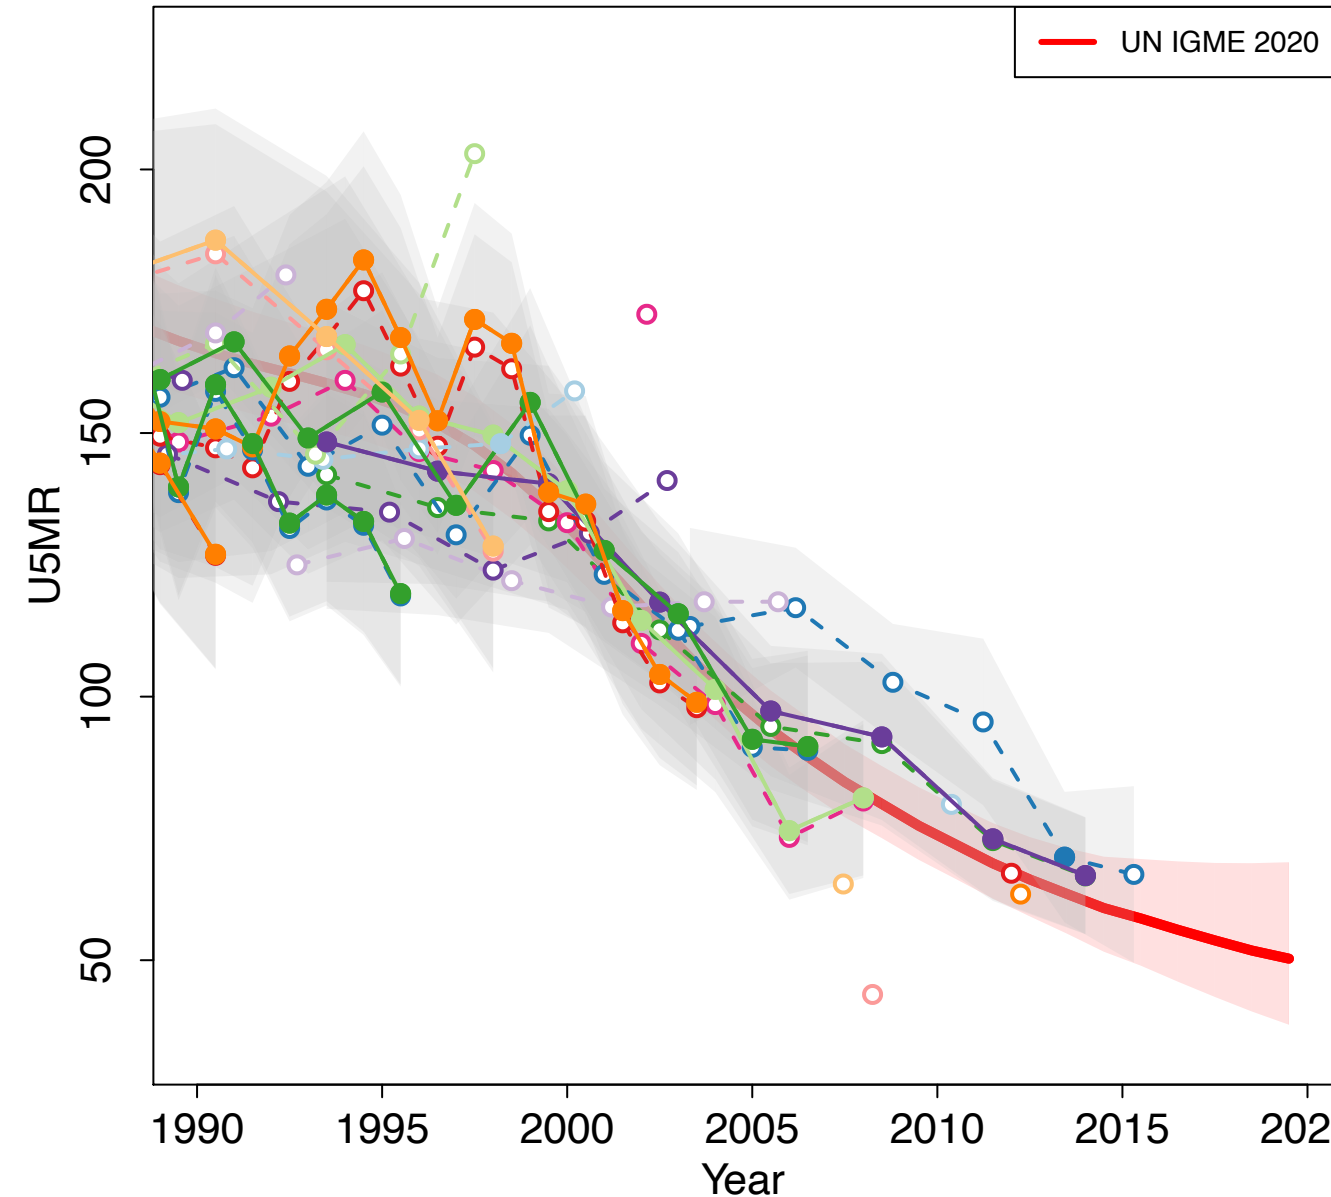

- Census 1967 (Census Indirect)
- Census 1967 (Others Household Deaths)
- National Demographic Survey 1973 (Others Household Deaths)
- Census 1978 (Census Indirect)
- Census 1988 (Census Indirect)
- Census 1988 (Others Household Deaths)
- Demographic and Health Survey (MM adjusted) 1991–1992 (DHS Direct)
- Demographic and Health Survey 1991–1992 (DHS Direct)
- Demographic and Health Survey 1991–1992 (DHS Indirect)
- Demographic and Health Survey (MM adjusted) 1996 (DHS Direct)
- Demographic and Health Survey 1996 (DHS Direct)
- Demographic and Health Survey 1996 (DHS Indirect)
- Demographic and Health Survey (MM adjusted) 1999 (DHS Direct)
- Demographic and Health Survey 1999 (DHS Direct)
- Demographic and Health Survey 1999 (DHS Indirect)
- Census 2002 (Census Indirect)
- Census 2002 (Others Household Deaths)
- Demographic and Health Survey (MM adjusted) 2004–2005 (DHS Direct)
- Demographic and Health Survey 2004–2005 (DHS Direct)
- Demographic and Health Survey 2004–2005 (DHS Indirect)
- AIDS Indicator Survey (MM adjusted) 2007–2008 (Other DHS Direct)
- AIDS Indicator Survey 2007–2008 (Other DHS Direct)
- AIDS Indicator Survey 2007–2008 (Other DHS Indirect)
- AIDS Indicator Survey 2007–2008 (Others Household Deaths)
- National Panel Survey 2008–2009 (Others Household Deaths)
- Demographic and Health Survey (MM adjusted) 2010 (DHS Direct)
- National Panel Survey 2010–2011 (Others Household Deaths)
- Demographic and Health Survey 2010 (DHS Direct)
- National Panel Survey 2012–2013 (Others Household Deaths)
- Census 2012 (Census Indirect)
- Demographic and Health Survey (MM adjusted) 2015–2016 (DHS Direct)
- Demographic and Health Survey 2015–2016 (DHS Direct)
- Malaria Indicator Survey 2017 (Other DHS Indirect)

### Thailand

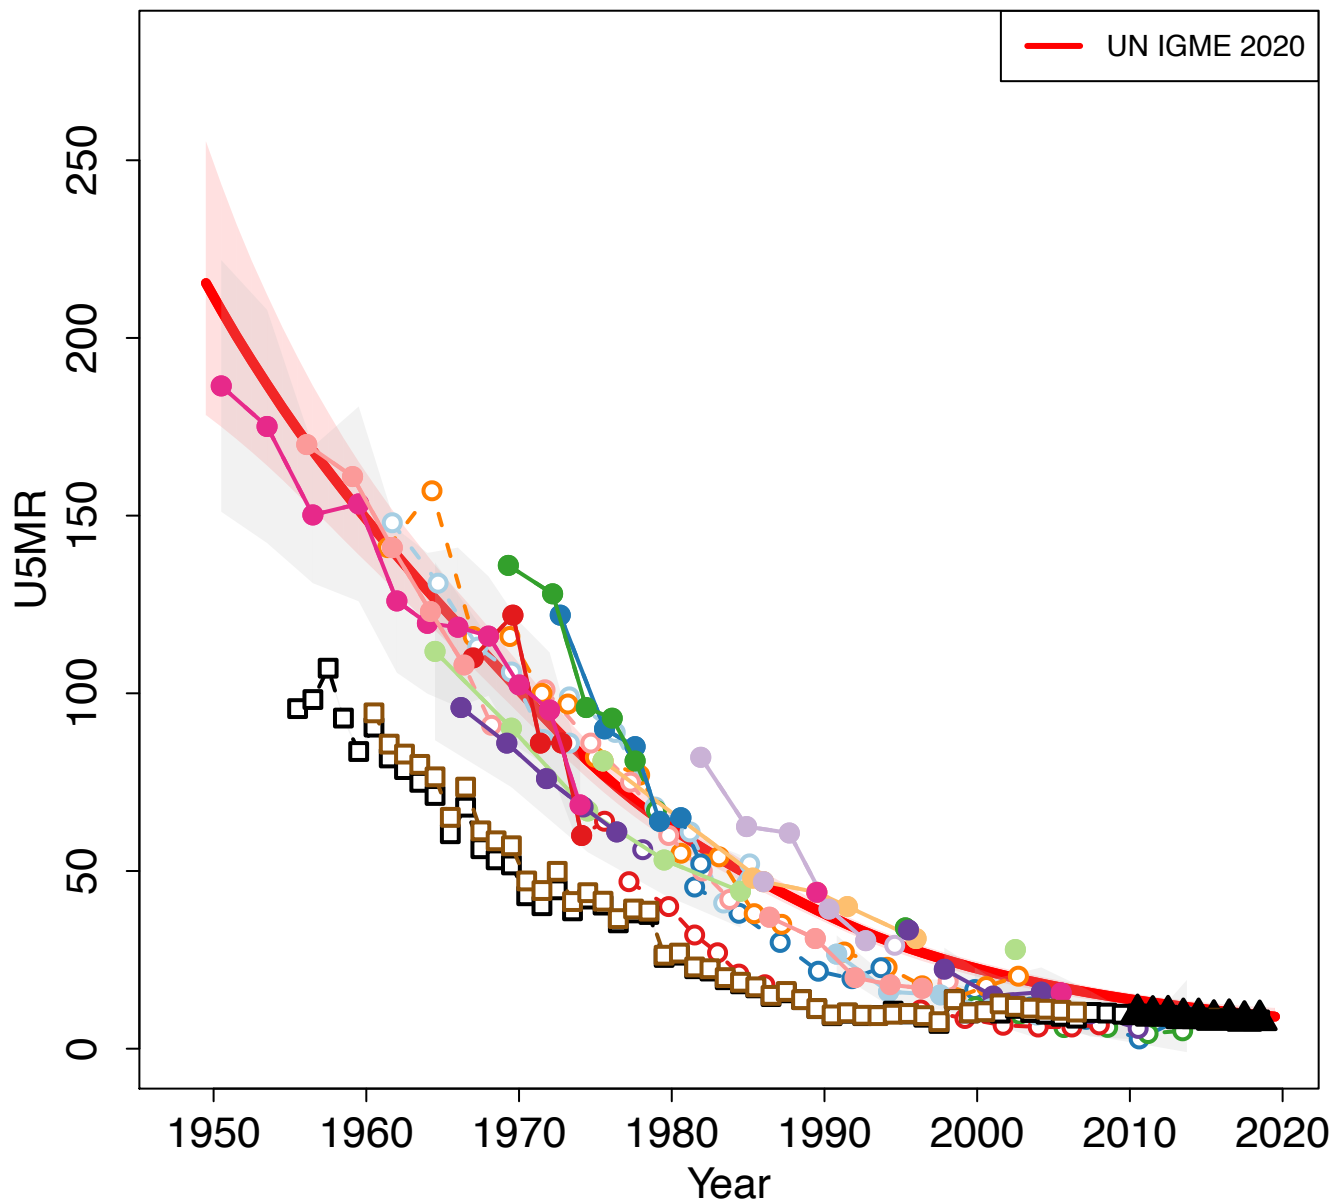

### Zoomed in

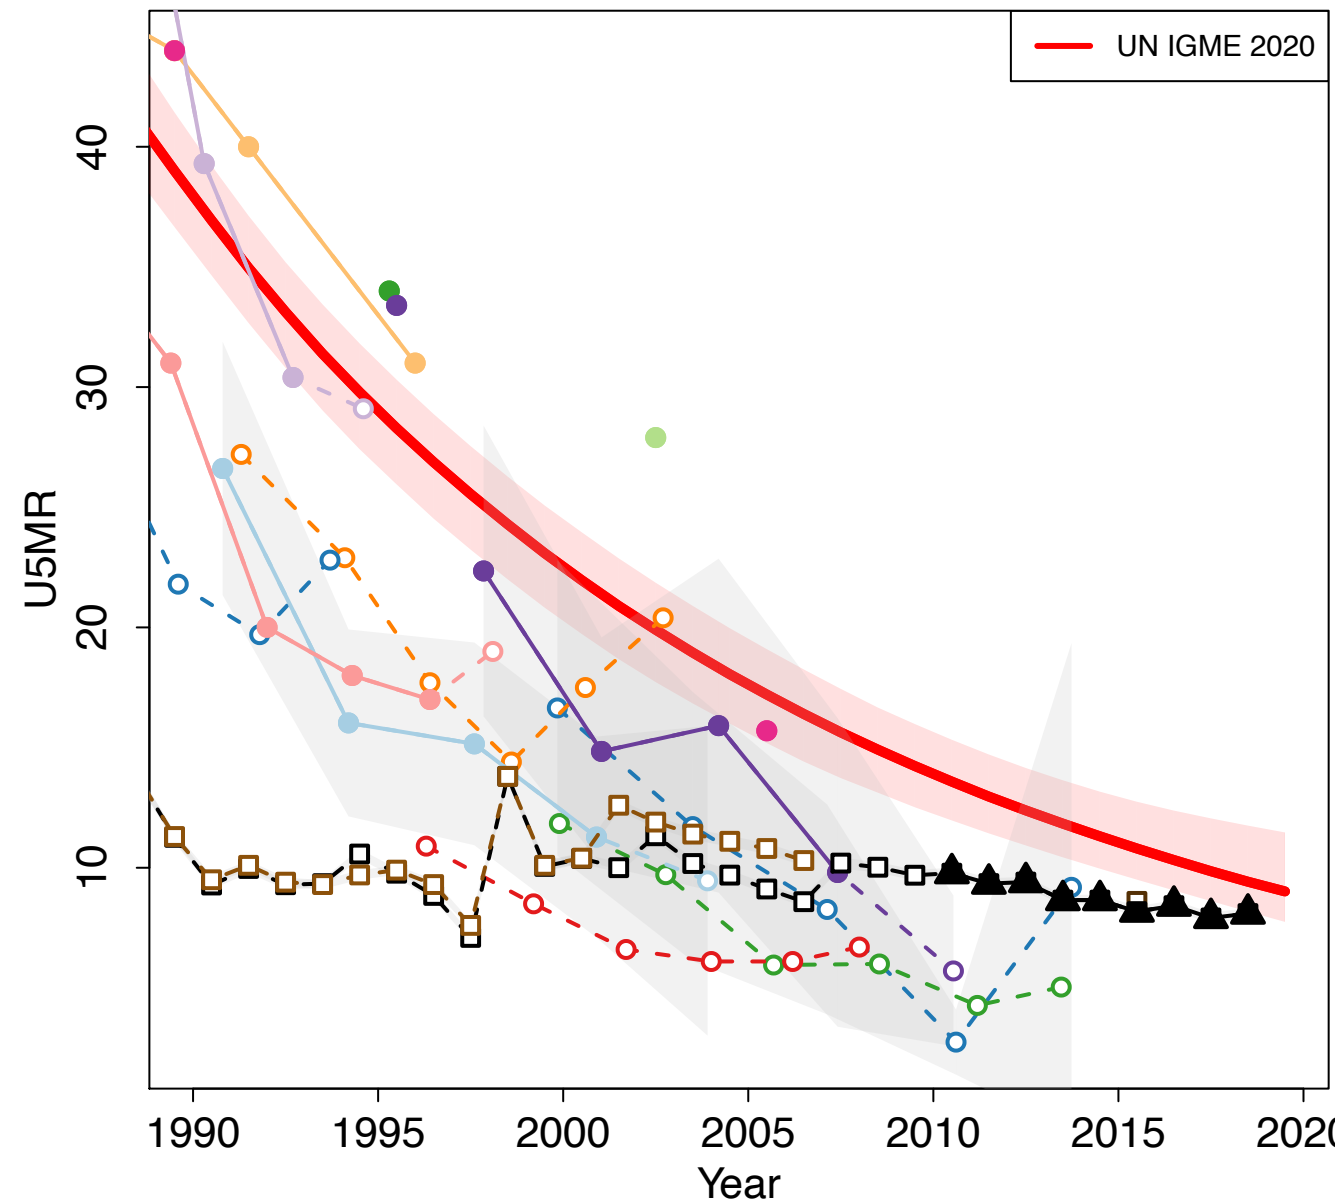

- Census 1970 (Census Indirect)
- Survey of Population Change 1974–1975 (Others Direct)
- Survey of Population Change 1974–1975 (Others Indirect)
- World Fertility Survey 1975 (Other DHS Direct)
- World Fertility Survey 1975 (Other DHS Indirect)
- National Fertility Survey 1979 (Others Indirect)
- Census 1980 (Census Indirect)
- Contraceptive Prevalence Survey 1981 (Others Indirect)
- Contraceptive Prevalence Survey 1984 (Others Indirect)
- Survey of Population Change 1985–1986 (Others Direct)
- Life Table by Hill 1980–1990 Intercensal Death 1985 (Others Life Table)
- Survey of Population Change 1985–1986 (Others Indirect)
- Demographic and Health Survey 1987 (DHS Direct)
- Demographic and Health Survey 1987 (DHS Indirect)
- Survey of Population Change 1989 (Others Direct)
- Survey of Population Change 1989 (Others Indirect)
- Census 1990 (Census Indirect)
- Survey of Population Change 1995–1996 (Others Direct)
- Life Table by Hill 1990–2000 Intercensal Death 1995 (Others Life Table)
- Survey of Population Change 1995–1996 (Others Indirect)
- Contraceptive Prevalence Survey 1996 (Others Indirect)
- National Life Tables 1996 (Others Life Table)
- Census 2000 (Census Indirect)
- Life Table in 2002 by Hill 2002 (Others Life Table)
- Multiple Indicator Cluster Survey 2005–2006 (MICS Indirect)
- Survey of Population Change 2005–2006 (Others Direct)
- Survey of Population Change 2005–2006 (Others Indirect)
- Census 2010 (Census Indirect)
- Multiple Indicator Cluster Survey 2012–2013 (MICS Indirect)
- Survey of Population Change 2015–2016 (Others Indirect)
- Multiple Indicator Cluster Survey 2015–2016 (MICS Indirect)
- VR Vital Registration
- VR Vital Registration from Ministry of Public Health
- VR WHO



### Timor-Leste

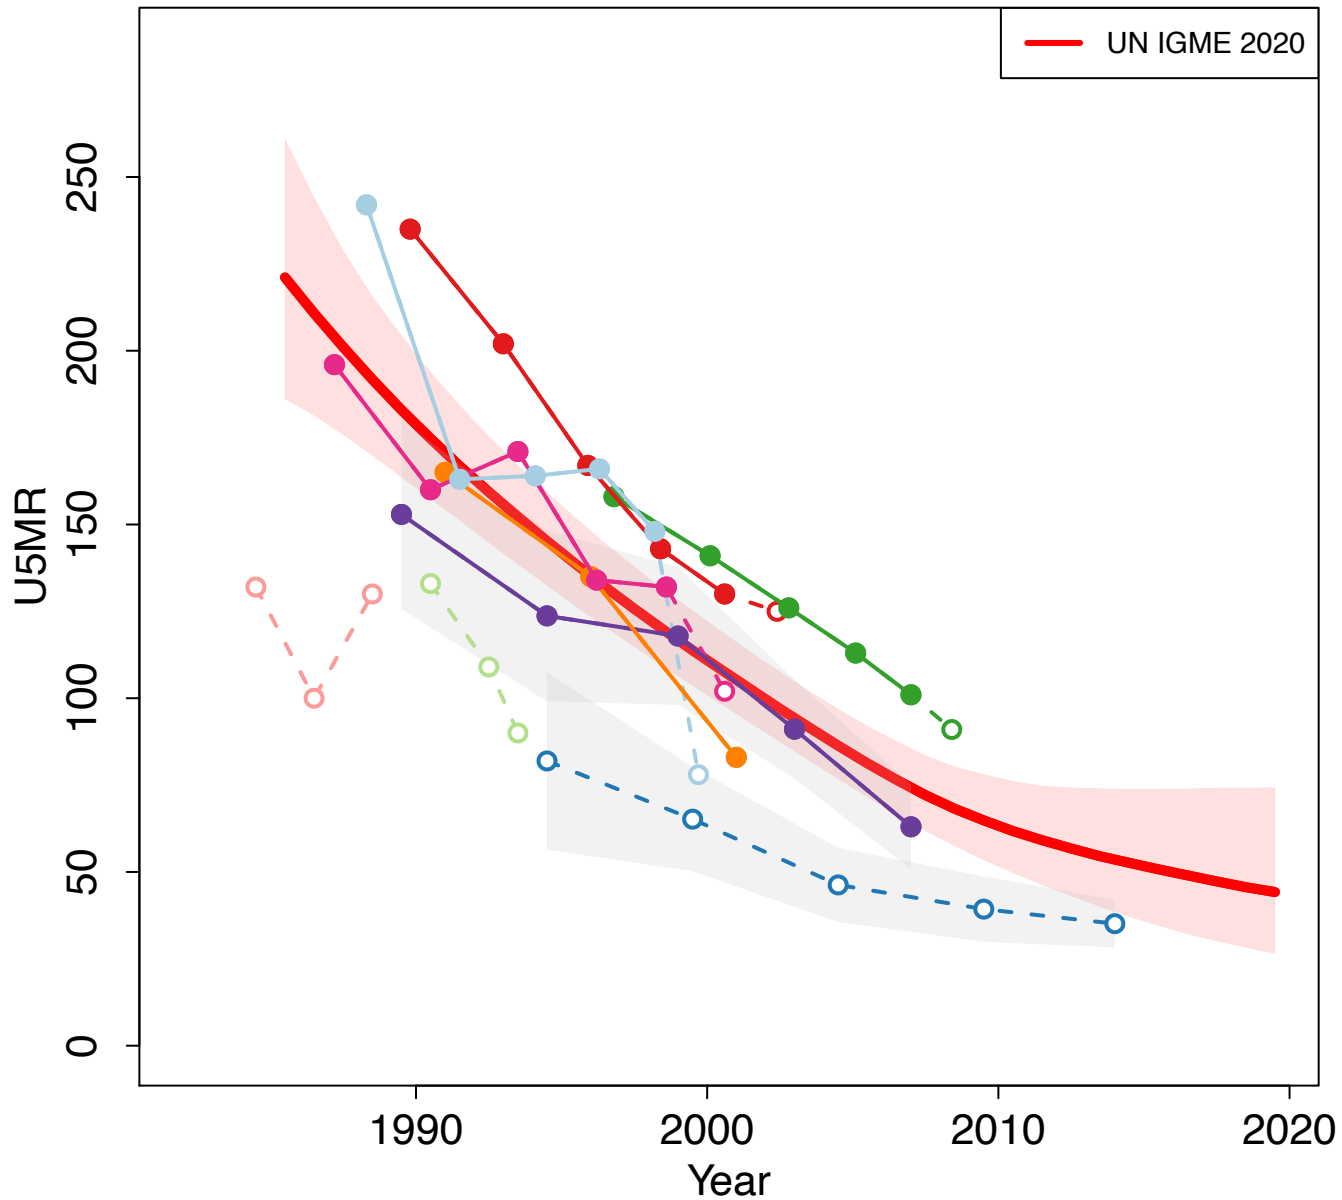

### Zoomed in

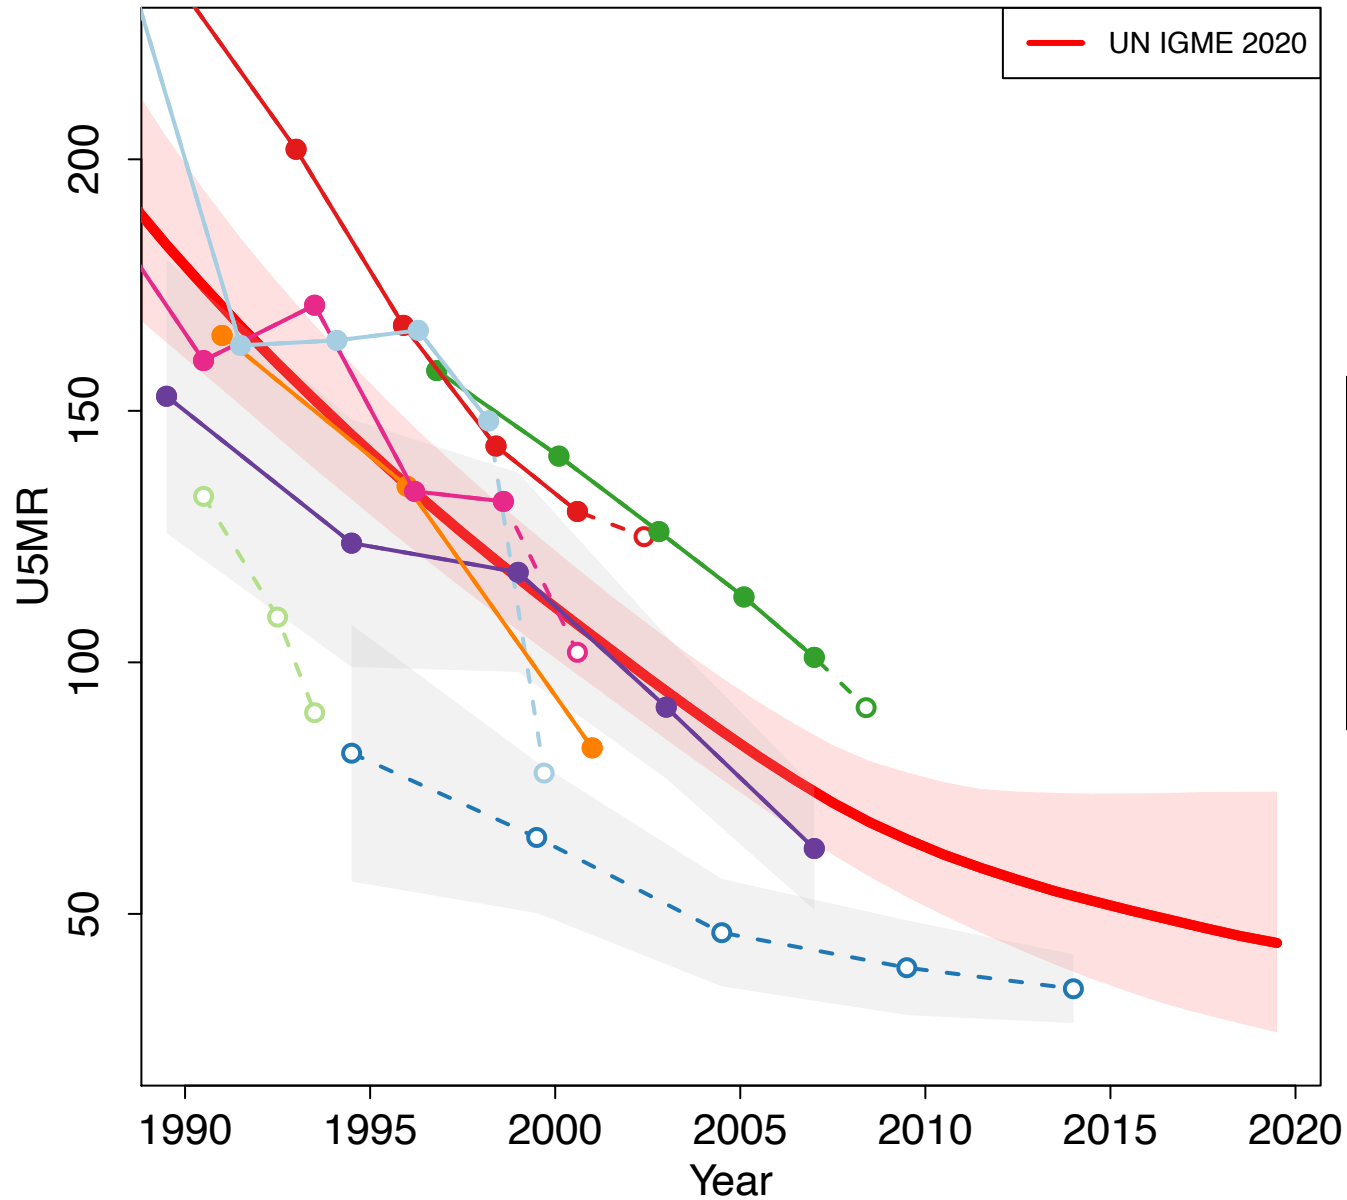

- Census 1990 (Census Indirect)
- ICS 1995 (Others Indirect)
- Living Standards Survey 2001 (Others Indirect)
- Multiple Indicator Cluster Survey 2002 (Others Indirect)
- Demographic and Health Survey 2003 (Other DHS Direct)
- Census 2004 (Census Indirect)
- Demographic and Health Survey 2009-2010 (DHS Direct)
- Census 2010 (Census Indirect)
- Demographic and Health Survey 2016 (DHS Direct)



### Togo

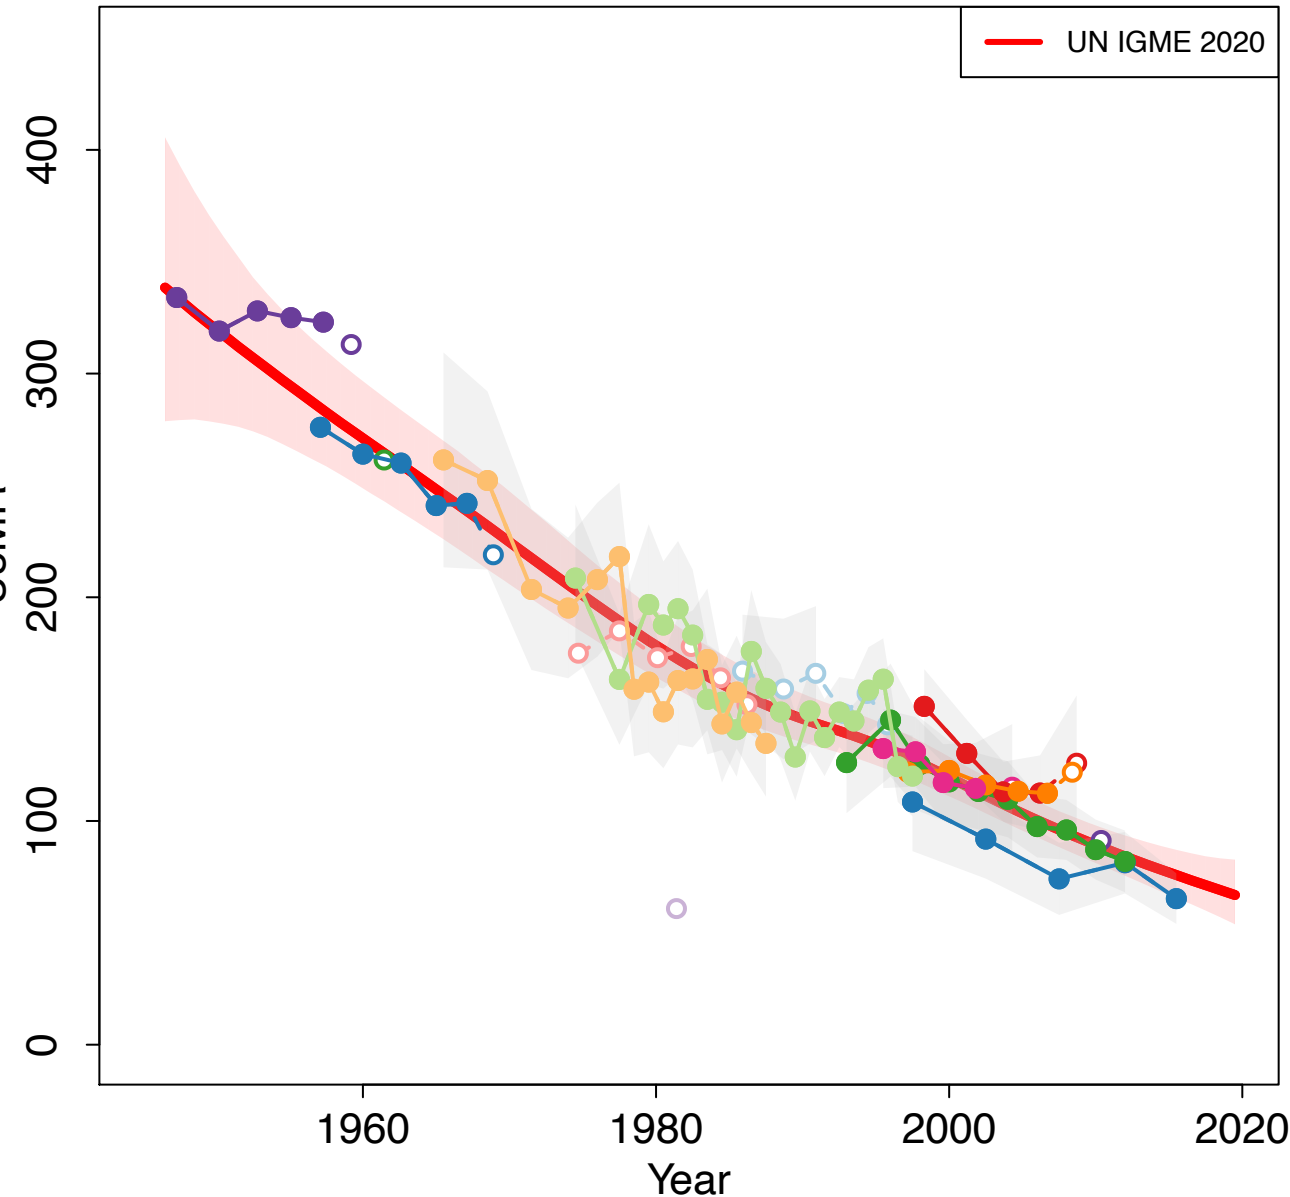

### Zoomed in

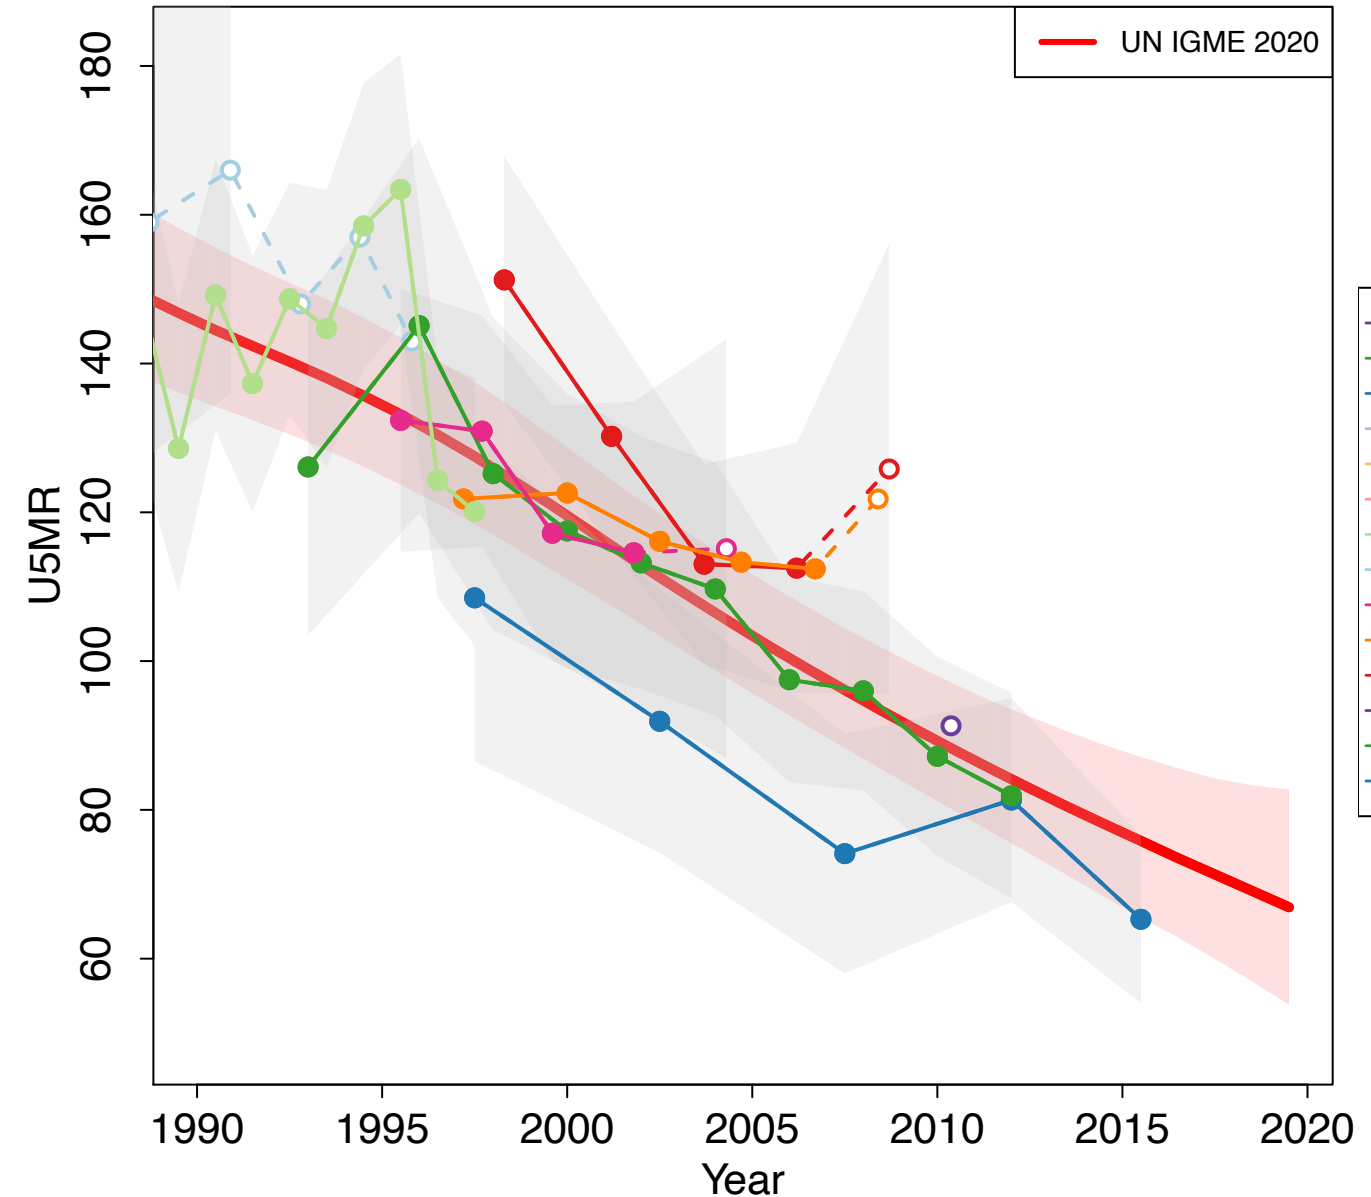

- Demographic survey 1961 (Others Indirect)
- Demographic survey 1961 (Others Household Deaths)
- Demographic Survey 1971 (Others Indirect)
- Census 1981 (Others Household Deaths)
- Demographic and Health Survey 1988 (DHS Direct)
- Demographic and Health Survey 1988 (DHS Indirect)
- Demographic and Health Survey 1998 (DHS Direct)
- Demographic and Health Survey 1998 (DHS Indirect)
- Multiple Indicator Cluster Survey 2006 (MICS Indirect)
- Census 2010 (Census Indirect)
- Multiple Indicator Cluster Survey 2010 (MICS Indirect)
- Census 2010 (Others Household Deaths)
- Demographic and Health Survey 2013–2014 (DHS Direct)
- Multiple Indicator Cluster Survey 2017 (MICS Direct)

### Tonga

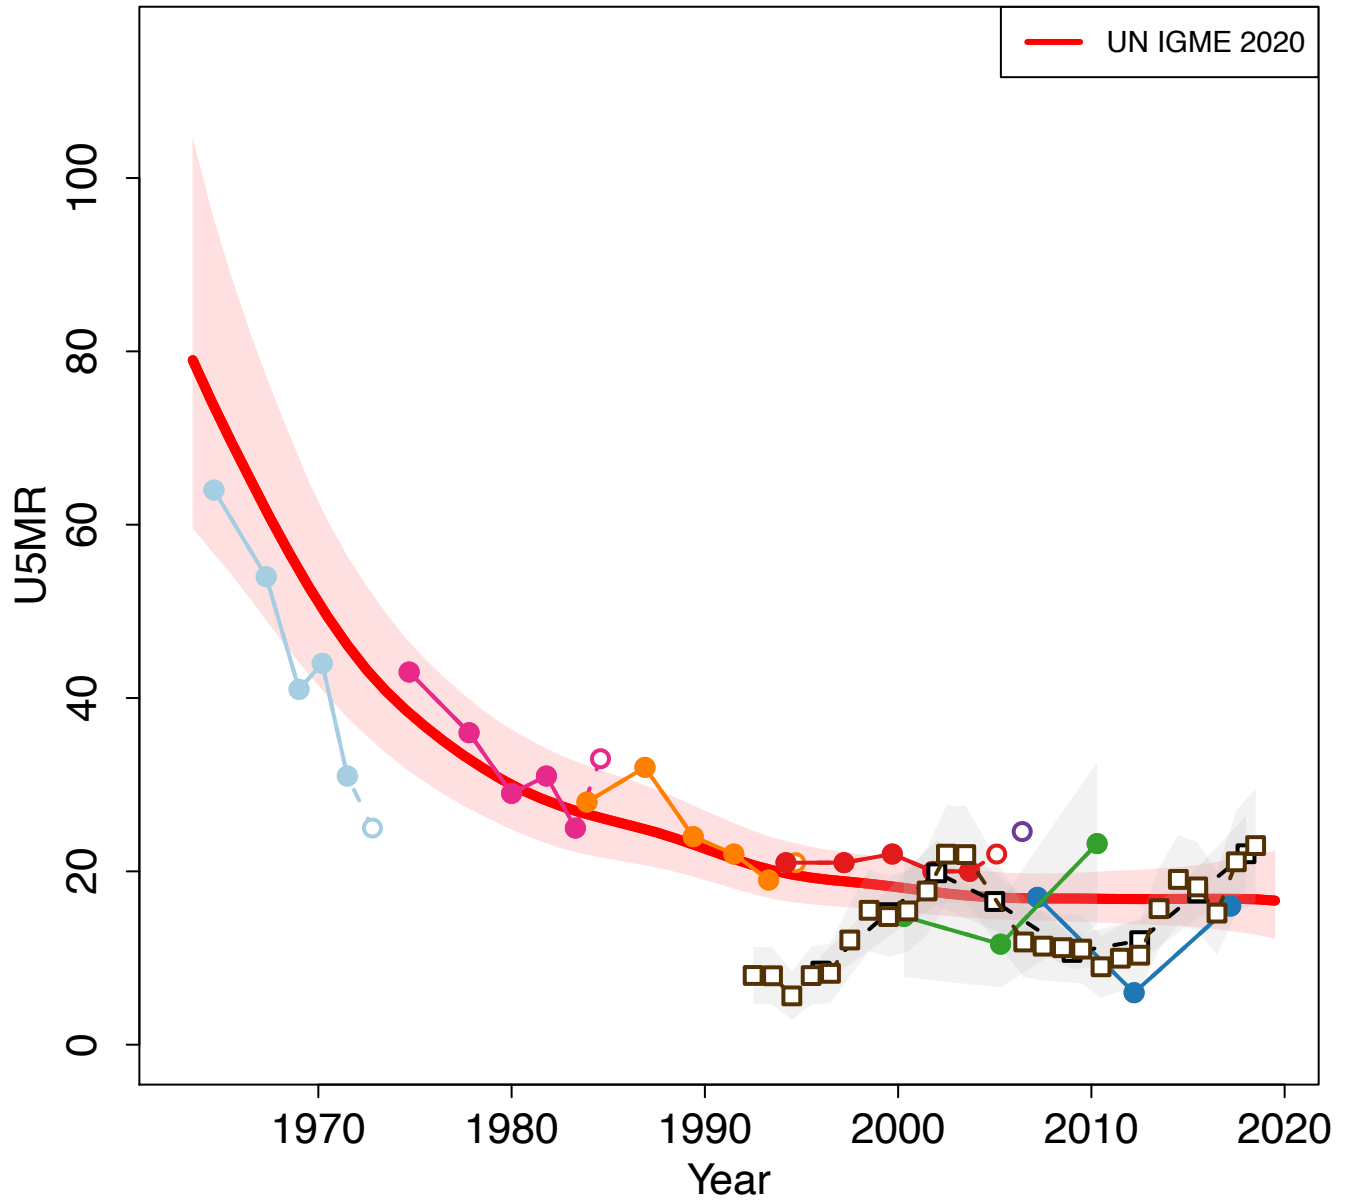

### Zoomed in

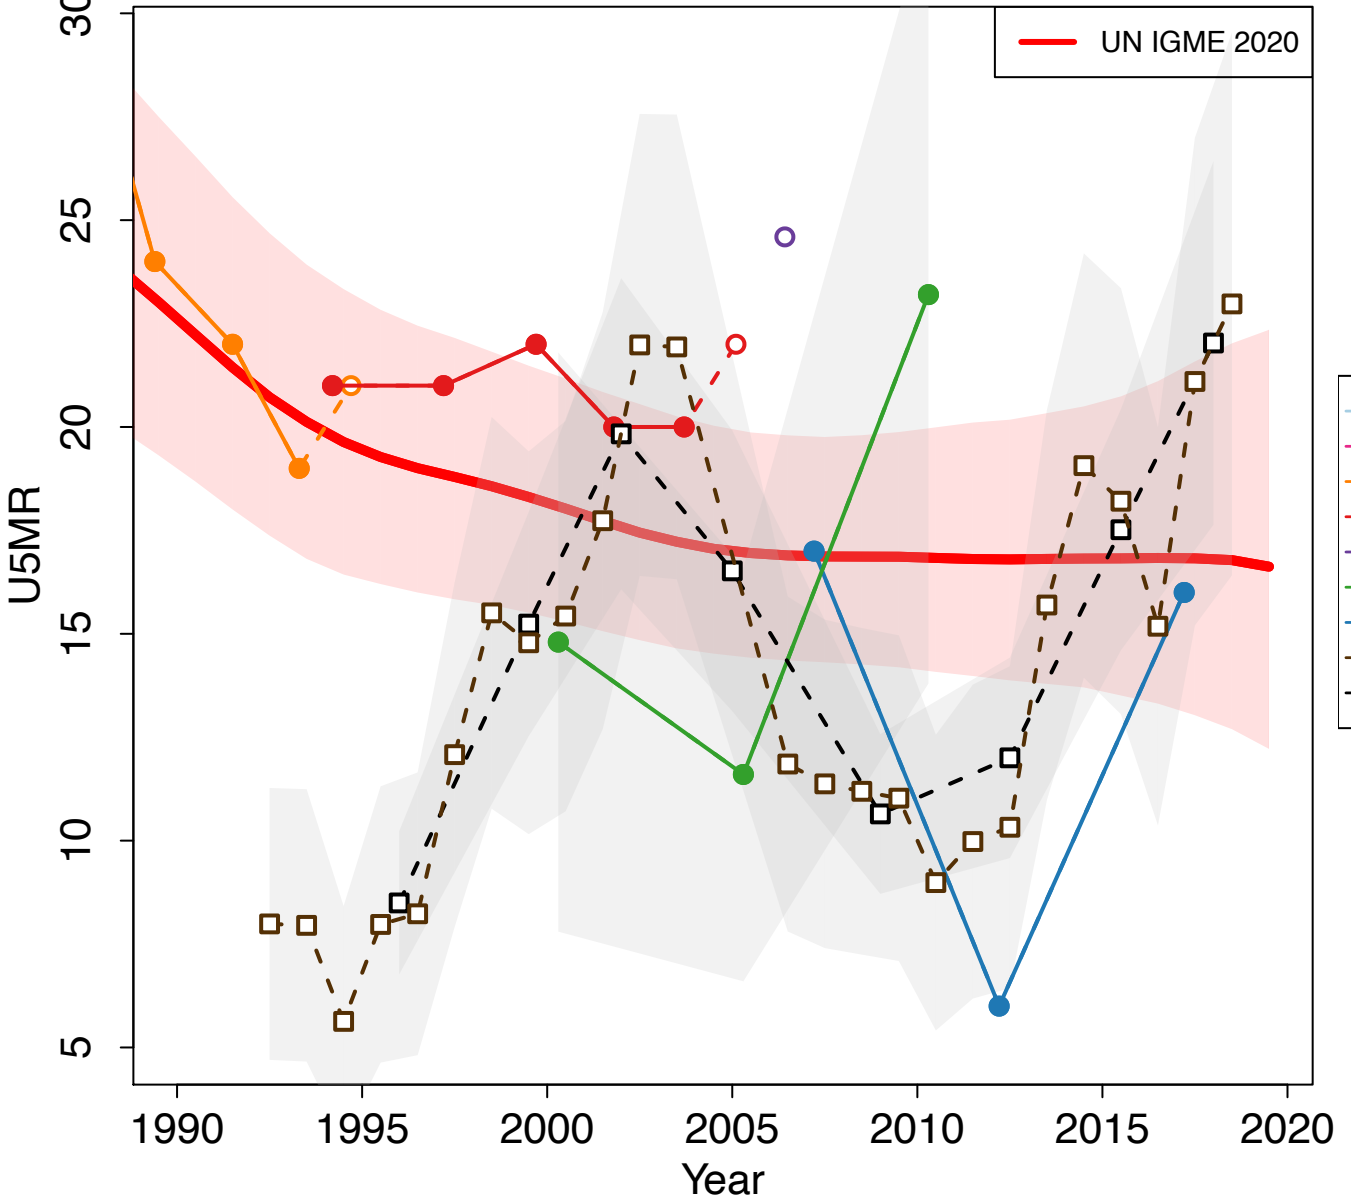

- Census 1976 (Census Indirect)
- Census 1986 (Census Indirect)
- Census 1996 (Census Indirect)
- Census 2006 (Census Indirect)
- Census 2006 (Others Household Deaths)
- National Demographic and Health Survey 2012 (Other DHS Direct)
- Multiple Indicator Cluster Survey (Preliminary) 2019 (MICS Direct)
- VR WHO
- VR WHO (Recalculated)

### Trinidad and Tobago

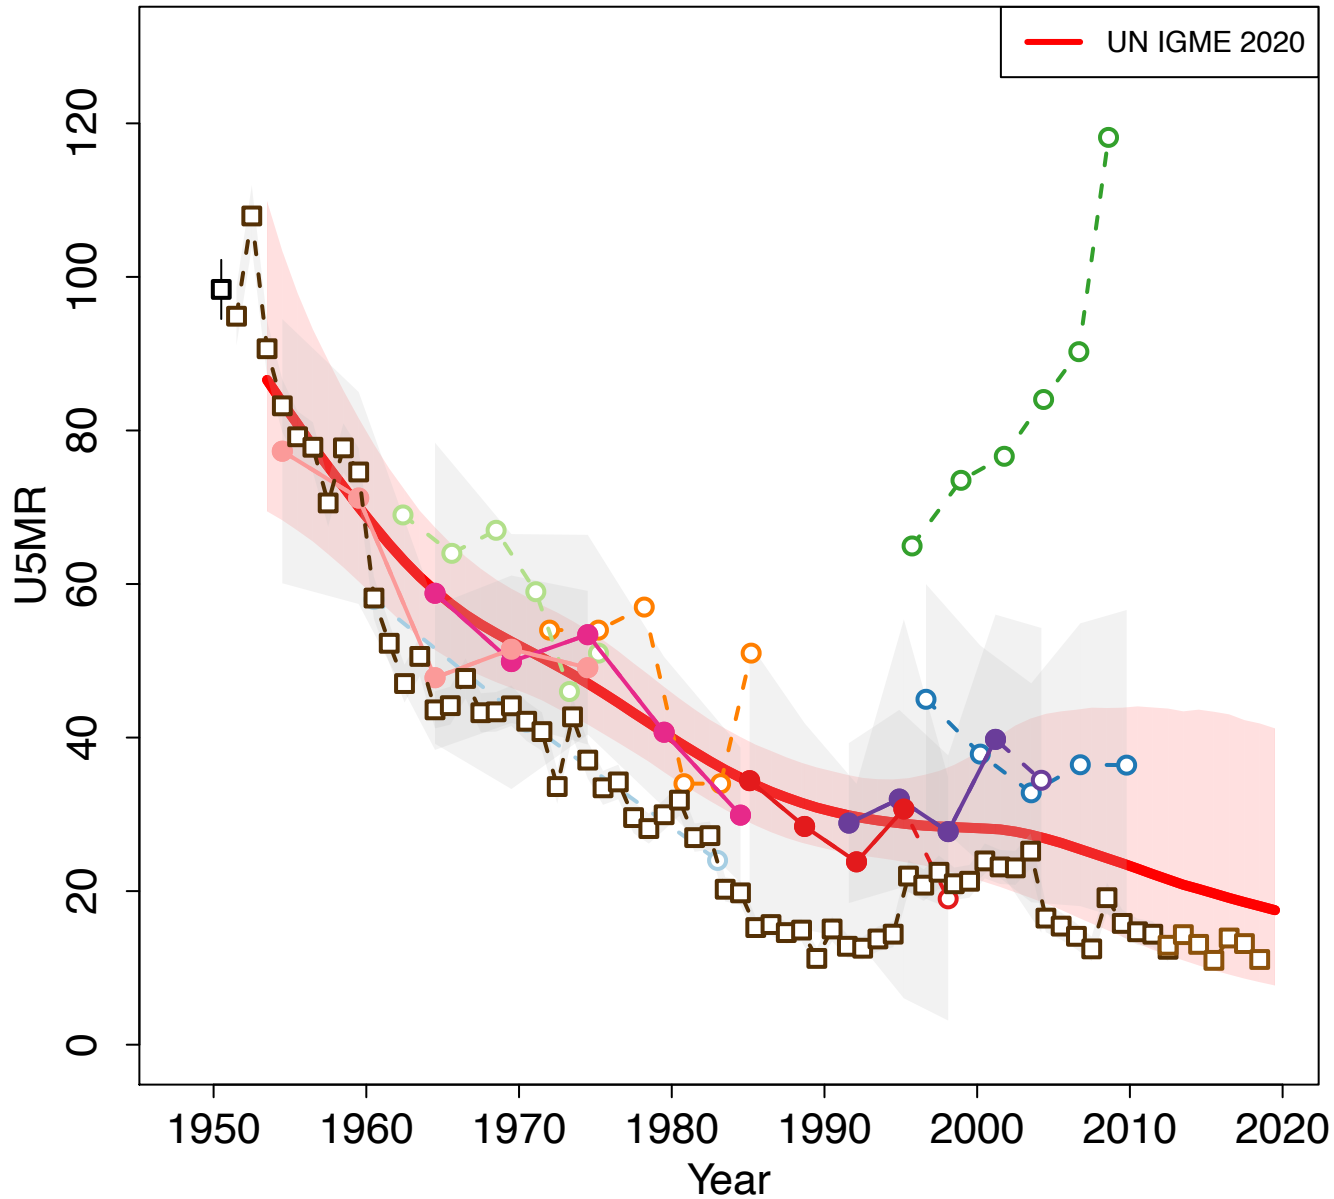

### Zoomed in

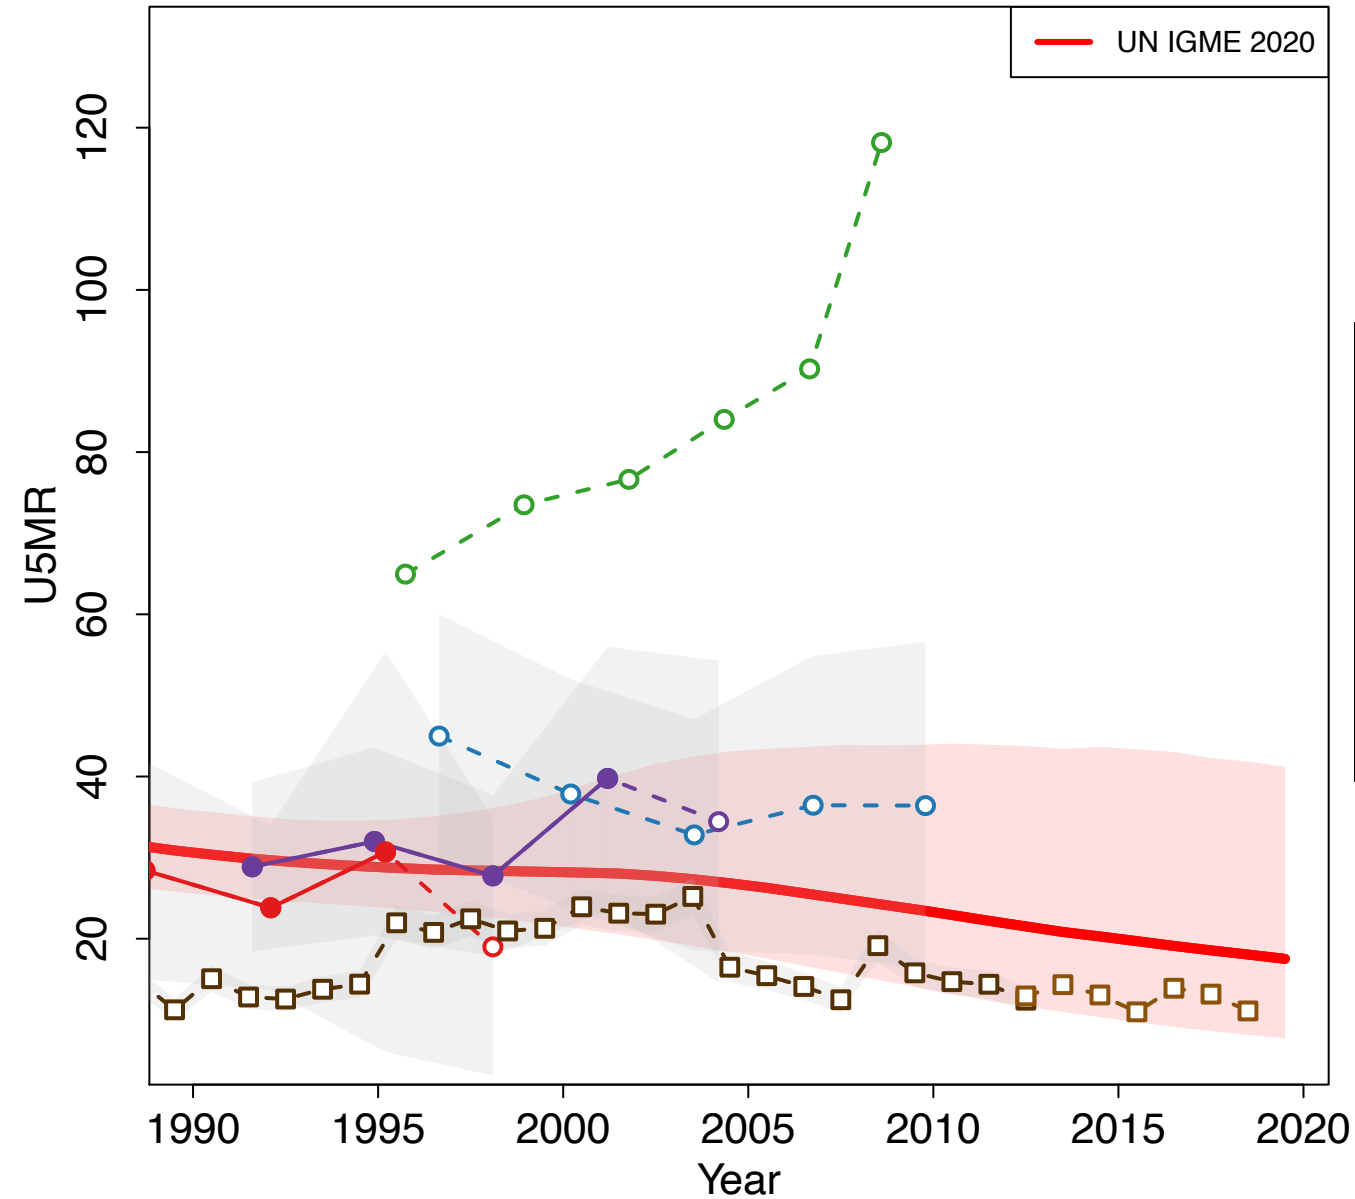

- World Fertility Survey 1977 (Other DHS Direct)
- World Fertility Survey 1977 (Other DHS Indirect)
- National Life Tables 1983 (Others Life Table)
- Demographic and Health Survey 1987 (DHS Direct)
- Demographic and Health Survey 1987 (DHS Indirect)
- Multiple Indicator Cluster Survey 2000 (MICS Indirect)
- Multiple Indicator Cluster Survey 2006 (MICS Indirect)
- Population and Housing Census 2011 (Census Indirect)
- Multiple Indicator Cluster Survey 2011 (MICS Indirect)
- VR Preliminary MoH Vital Registration Data
- VR WHO
- VR UNPD Demographic Yearbook Data 2020 version

### Tunisia

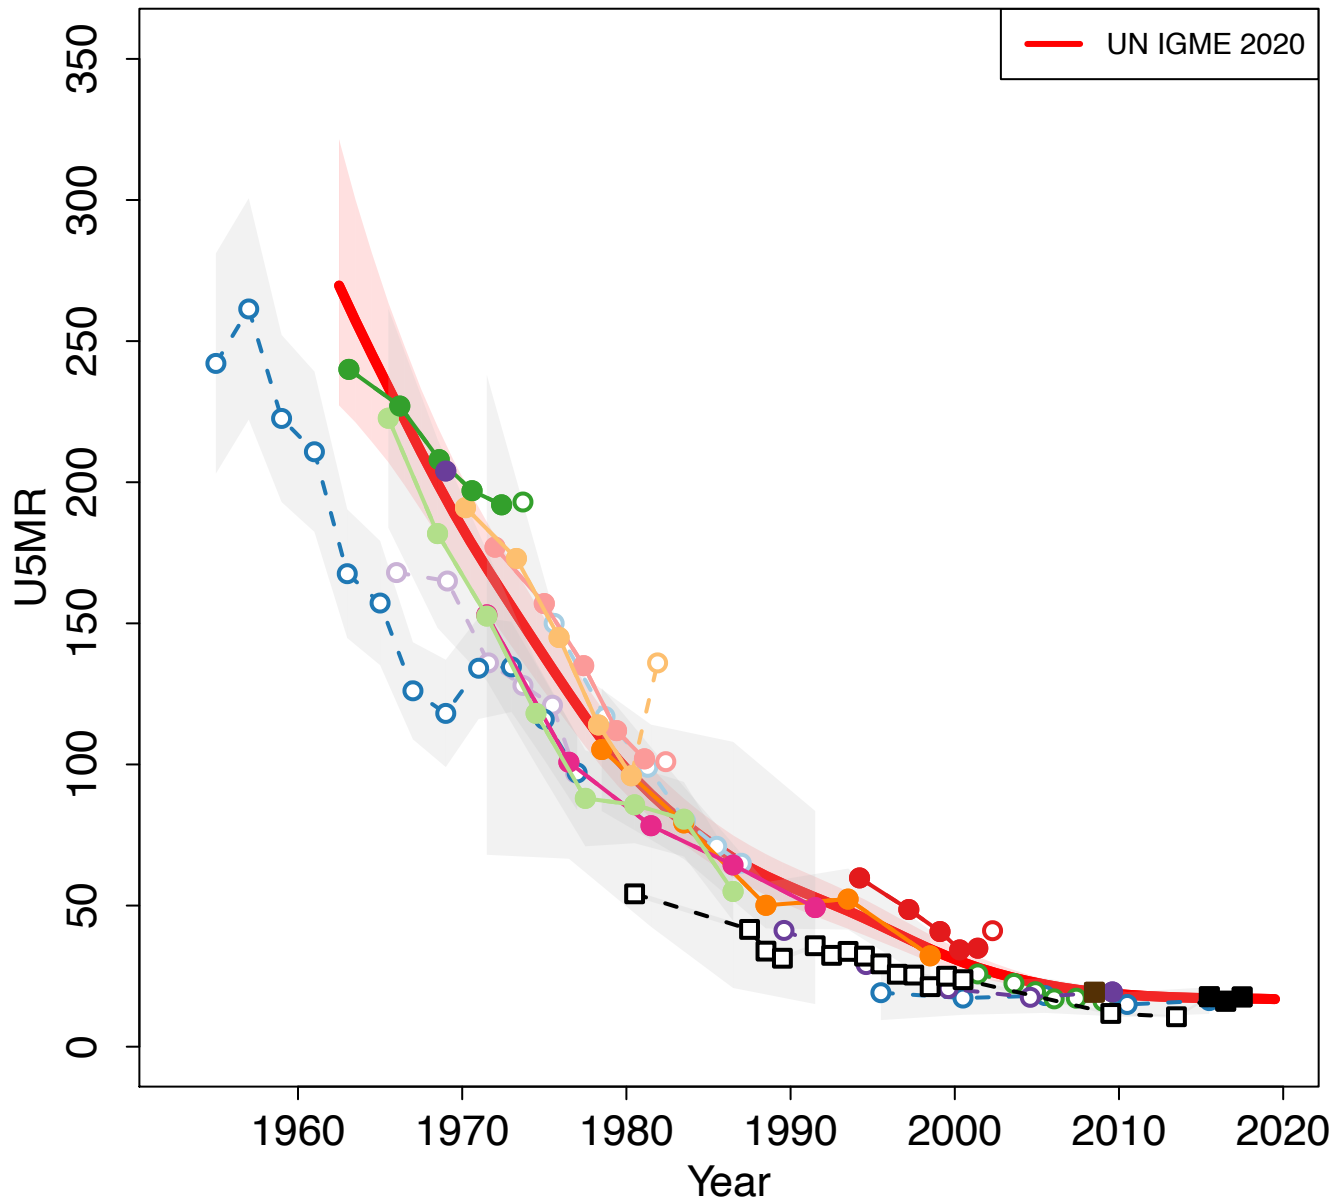

### Zoomed in

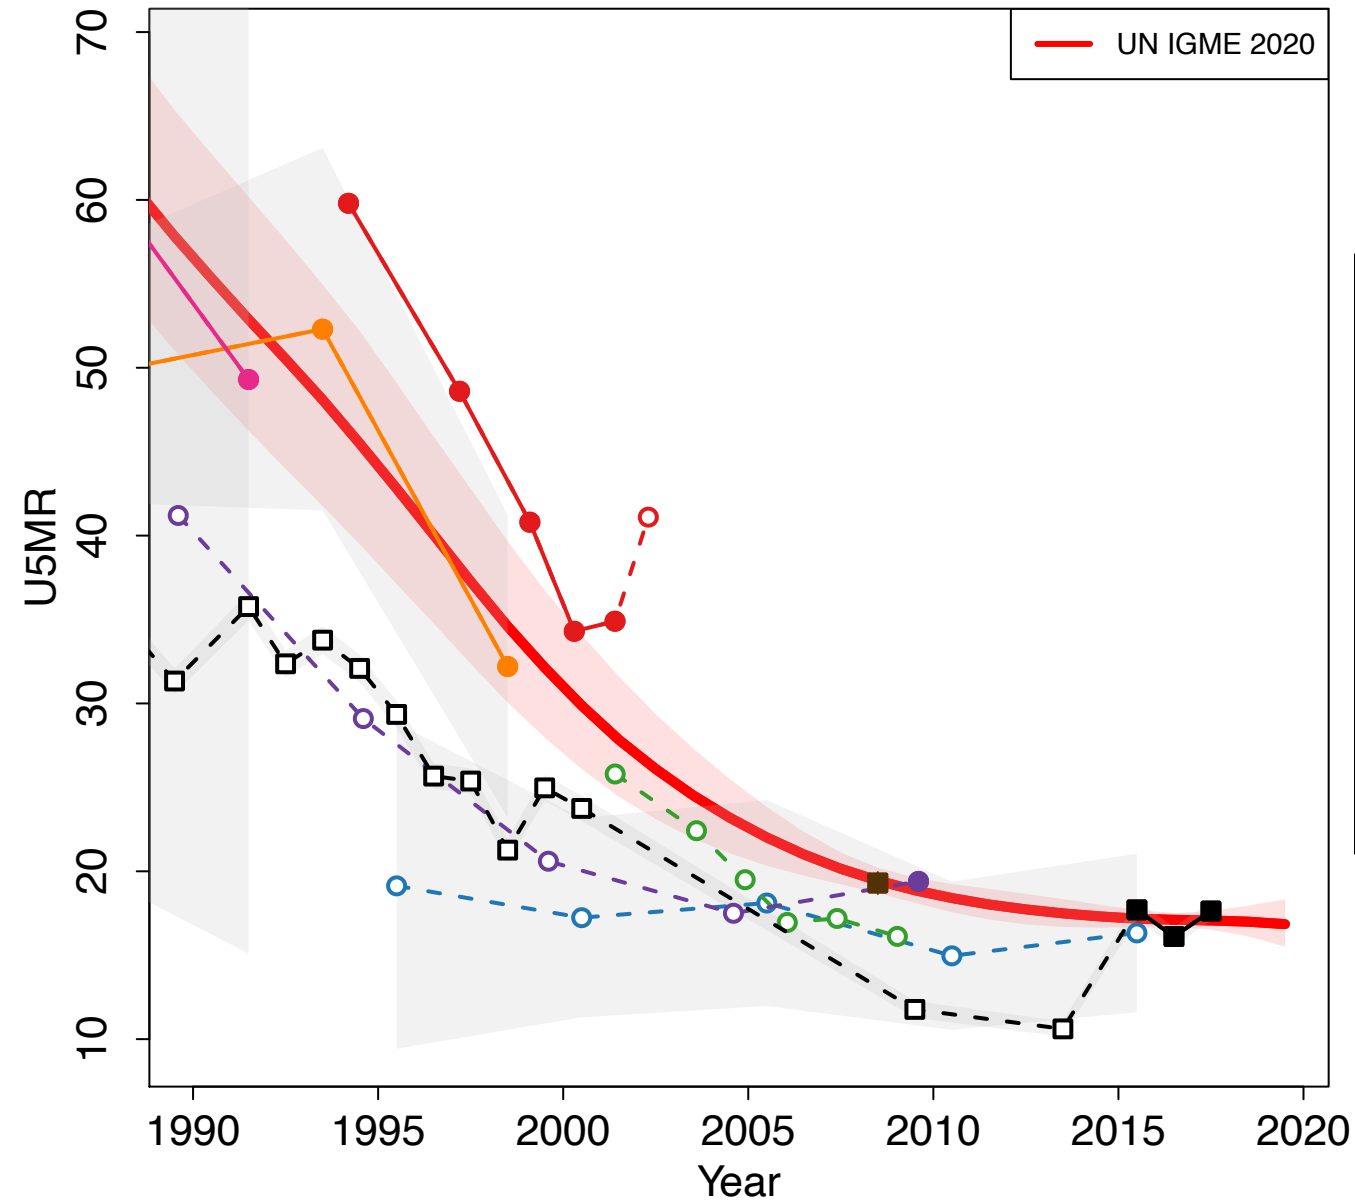

- National Demographic Survey 1968–1969 (Others Household Deaths)
- Census 1975 (Census Indirect)
- World Fertility Survey 1978 (Other DHS Direct)
- World Fertility Survey 1978 (Other DHS Indirect)
- Contraceptive Prevalence Survey 1983 (Others Indirect)
- Census 1984 (Census Indirect)
- Demographic and Health Survey 1988 (DHS Direct)
- Demographic and Health Survey 1988 (DHS Indirect)
- PAPCHILD Maternal and Child Health Survey 1994 (Others Direct)
- PAPFAM Family Health Survey 2001 (Others Direct)
- Census 2004 (Census Indirect)
- Multiple Indicator Cluster Survey 2011–2012 (MICS Direct)
- Census 2014 (Census Indirect)
- Multiple Indicator Cluster Survey 2018 (MICS Direct)
- VR Vital Registration from Institut National de la Statistique
- VR WHO

### Turkey

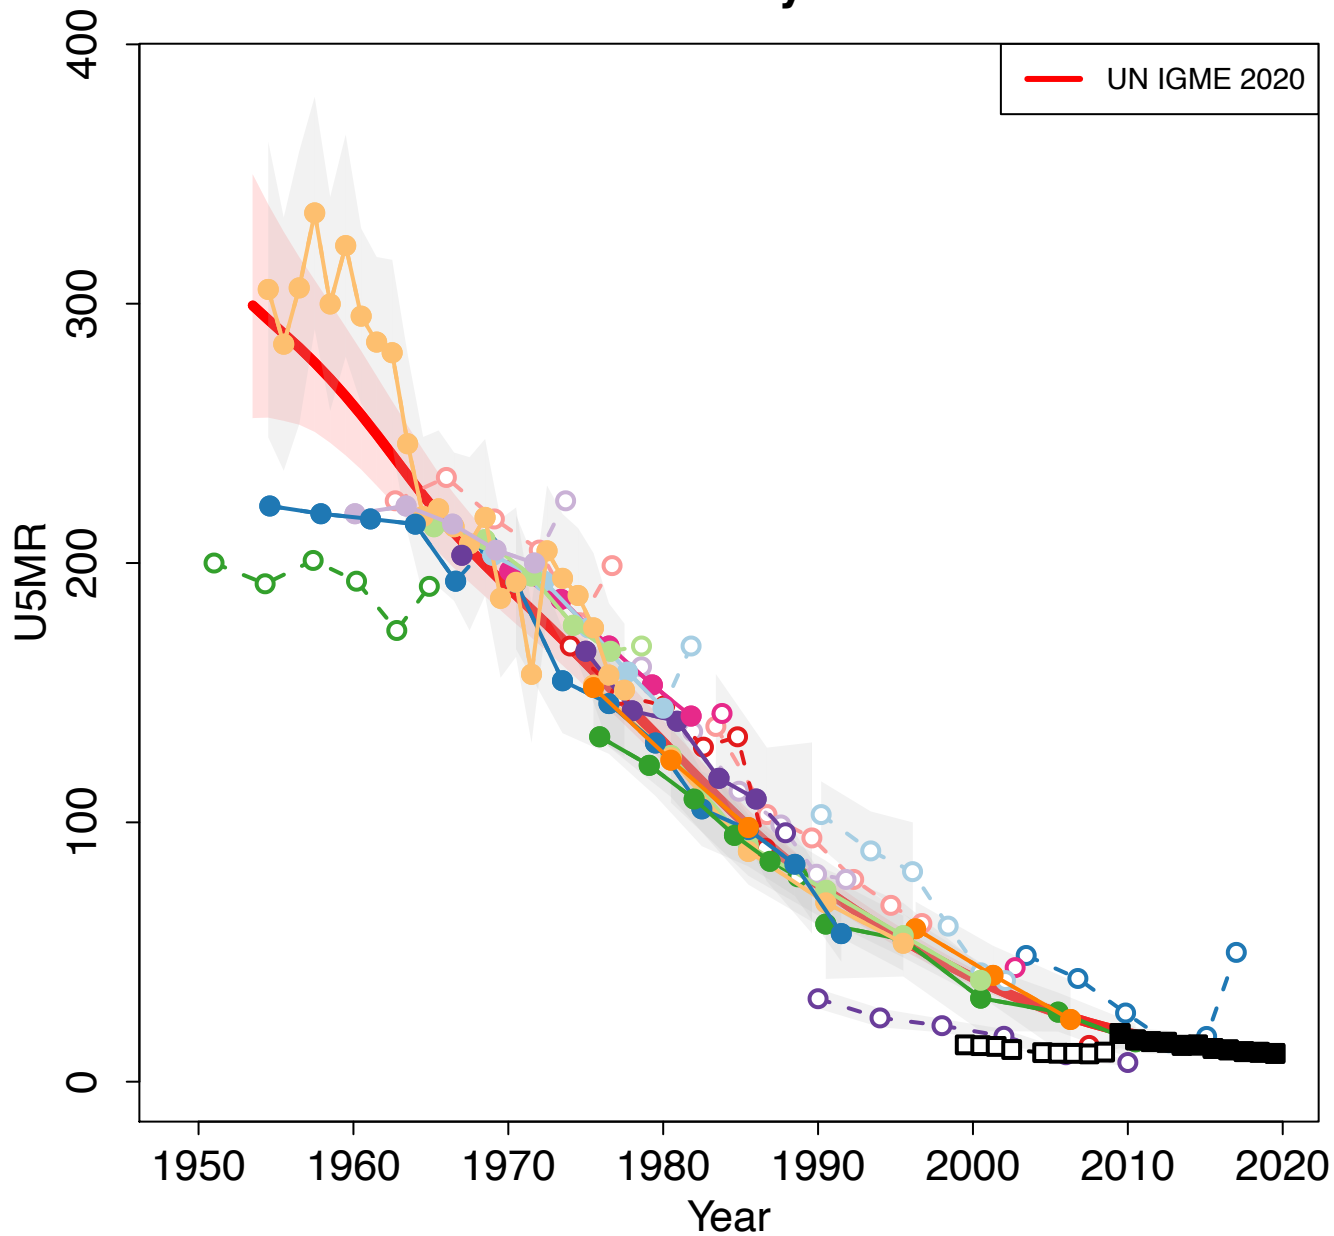

### Zoomed in

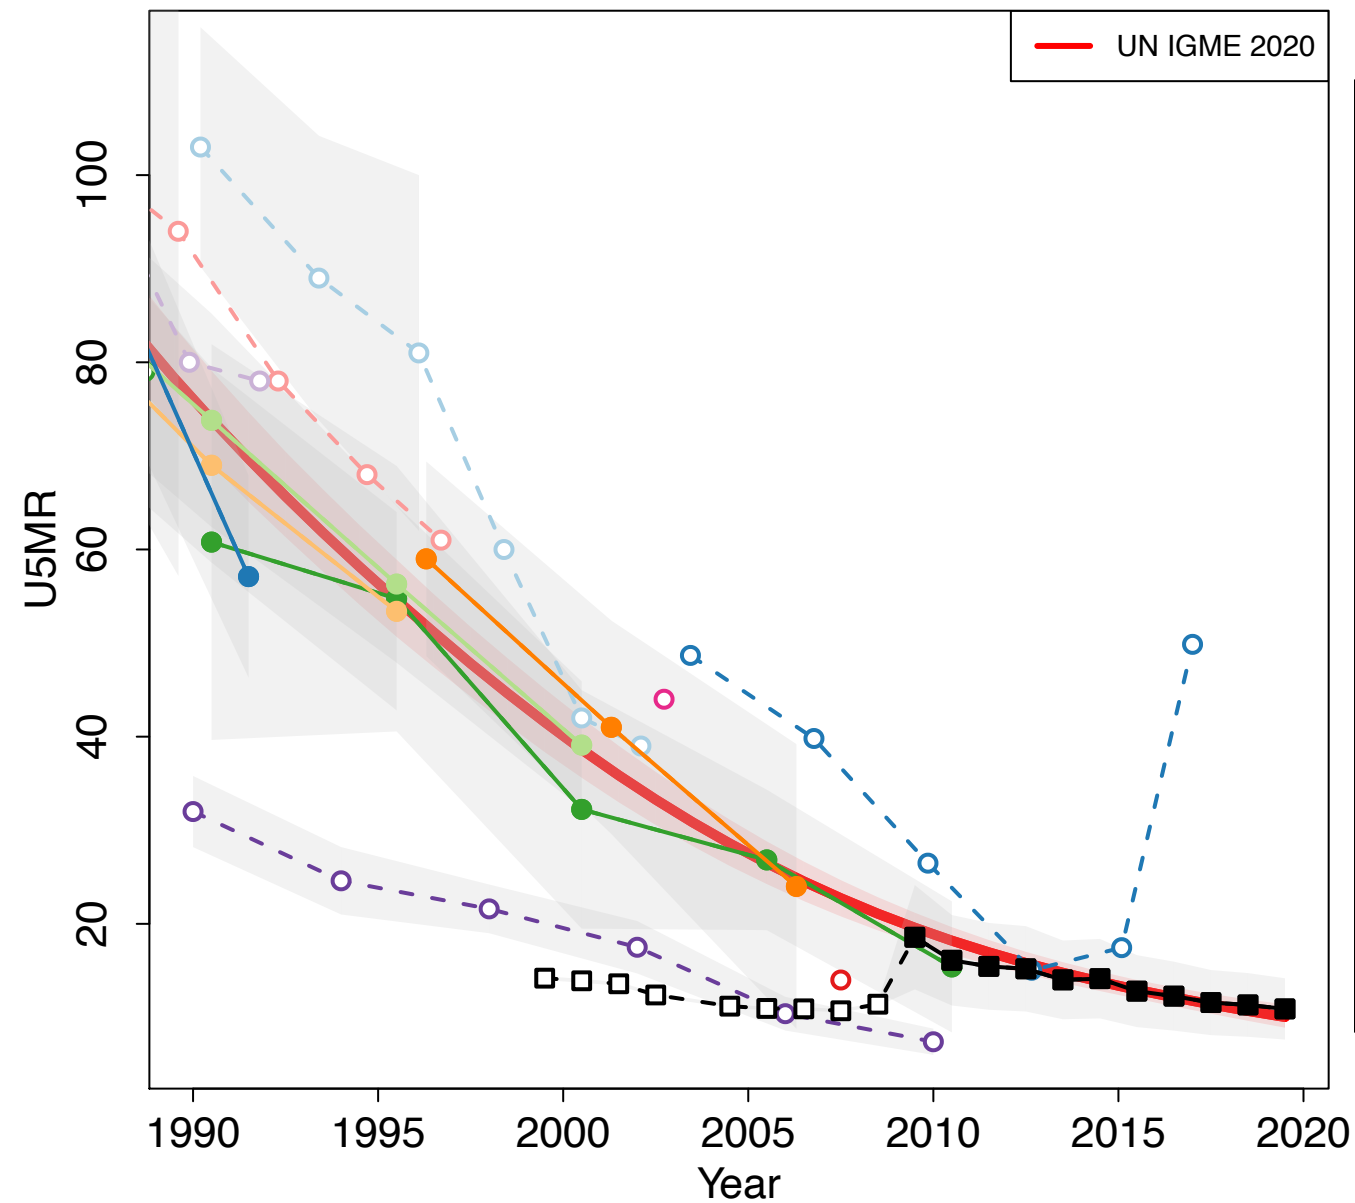

- Turkey Demographic Survey 1967 (Others Direct)
- Turkey Demographic Survey 1967 (Others Indirect)
- Census 1970 (Census Indirect)
- Census 1975 (Census Indirect)
- World Fertility Survey 1978 (Other DHS Direct)
- Turkey Fertility Survey 1978 (Other DHS Indirect)
- Census 1980 (Census Indirect)
- Turkey Population and Health Survey 1983 (Others Indirect)
- Census 1985 (Census Indirect)
- Turkey Population and Health Survey 1988 (Others Direct)
- Turkey Population and Health Survey 1988 (Others Indirect)
- Demographic Survey 1989 (Others Indirect)
- Census 1990 (Census Indirect)
- Demographic and Health Survey 1993 (DHS Direct)
- Demographic and Health Survey 1993 (DHS Indirect)
- Demographic and Health Survey 1998 (DHS Direct)
- Demographic and Health Survey 1998 (DHS Indirect)
- Demographic and Health Survey 2003–2004 (Other DHS Direct)
- Demographic and Health Survey 2003–2004 (Other DHS Indirect)
- National Verbal Autopsy Survey 2003 (Others Household Deaths)
- Demographic and Health Survey 2008 (Other DHS Direct)
- Turkey Child Mortality Survey 2010 (Others Direct)
- Turkey Child Mortality Survey 2012 (Others Direct)
- Demographic and Health Survey 2013 (Other DHS Direct)
- Demographic and Health Survey 2018 (Other DHS Indirect)
- VR WHO

### Turkmenistan

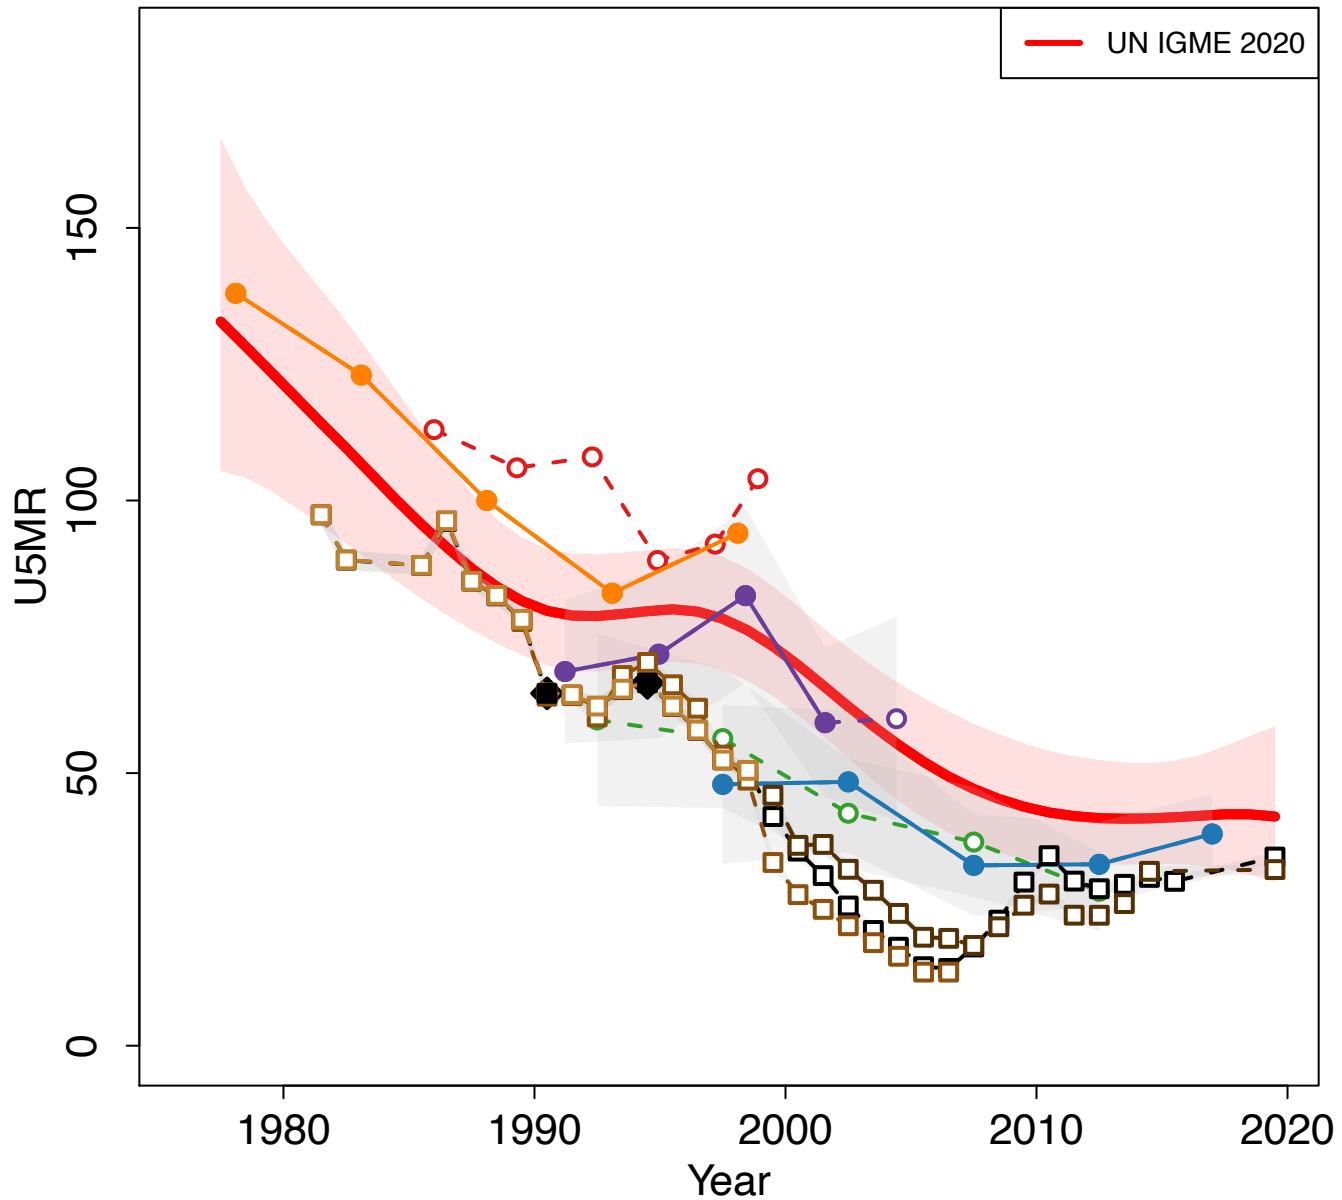

### Zoomed in

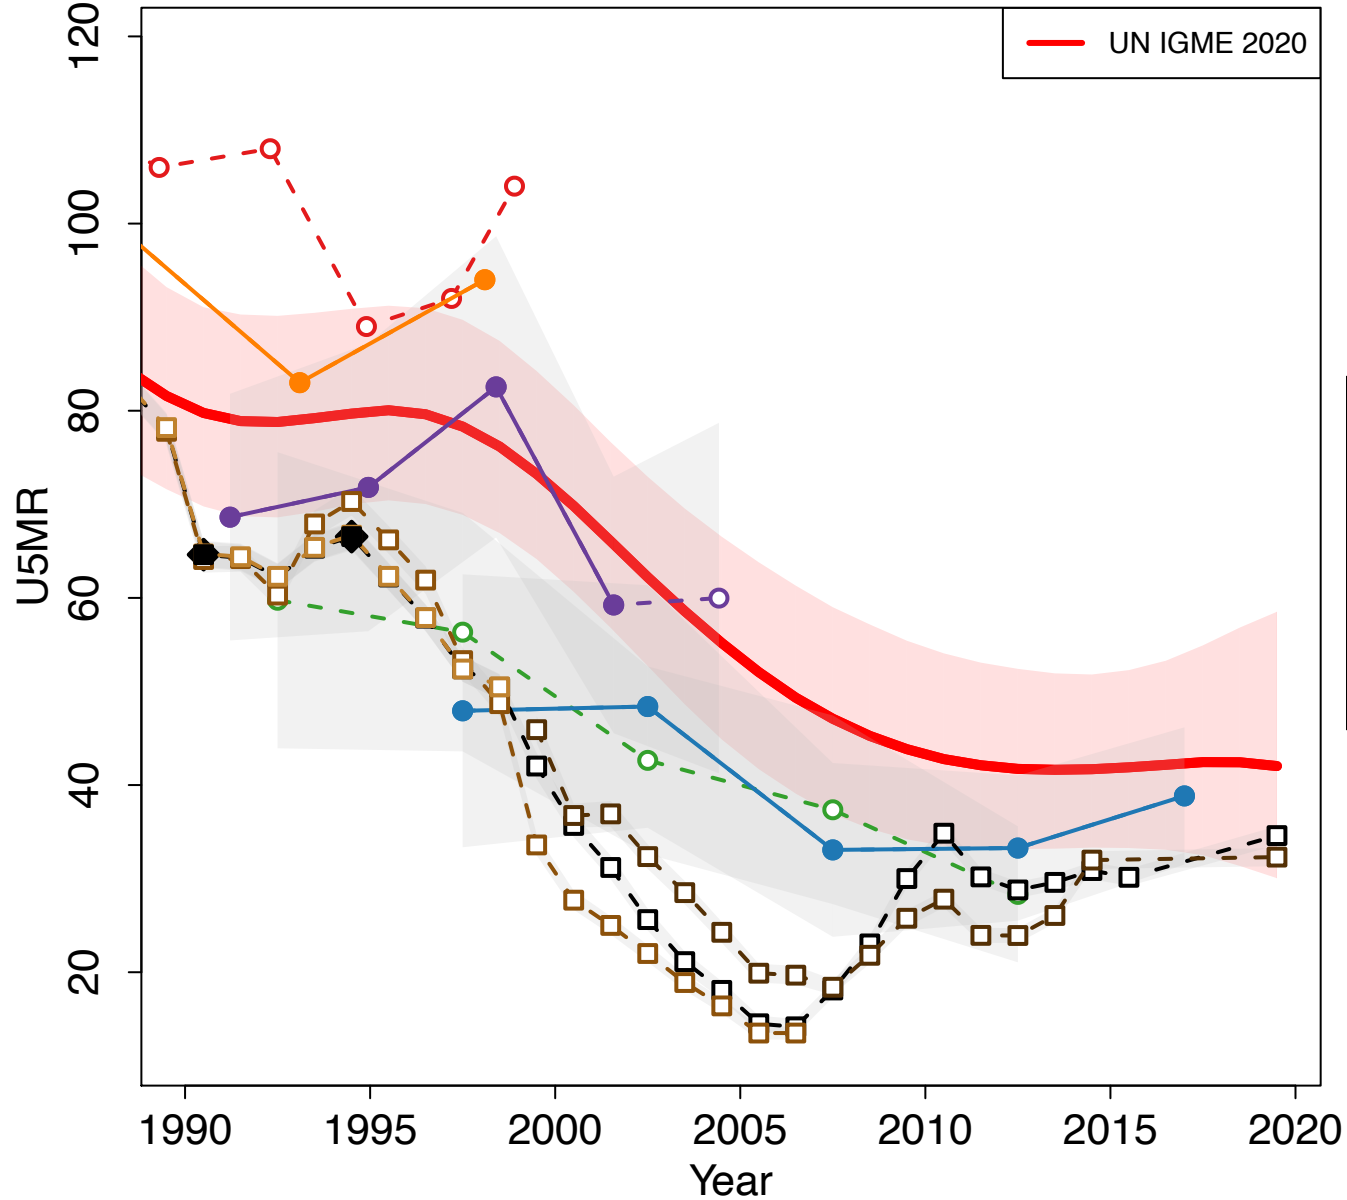

### Tuvalu

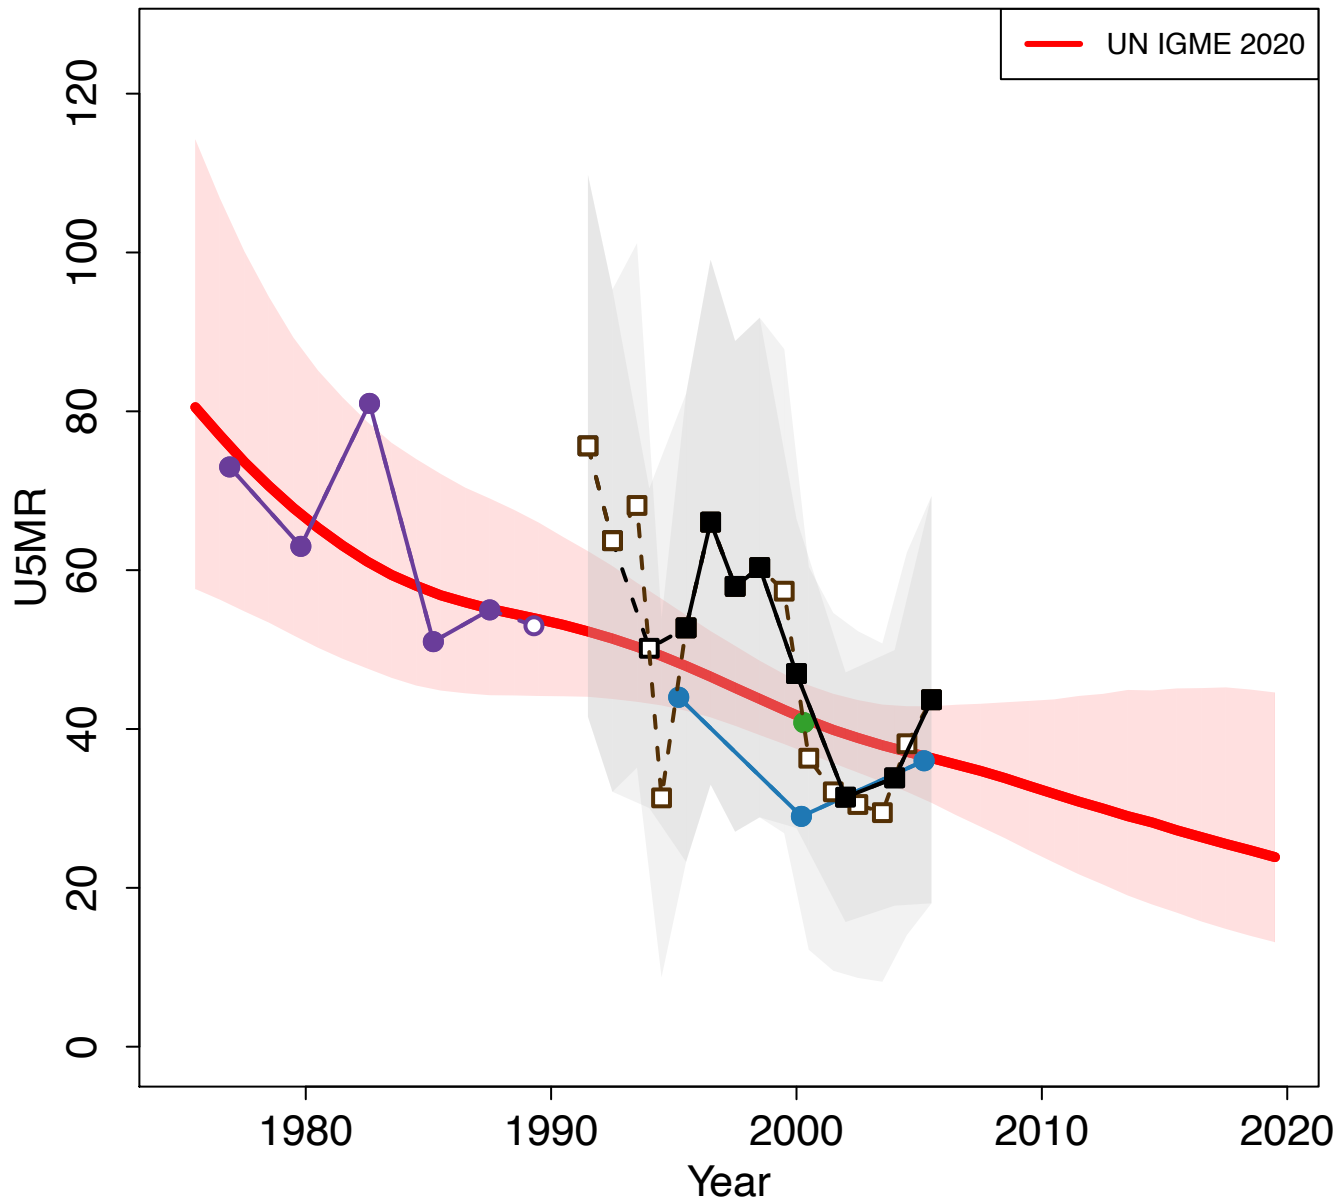

### Zoomed in

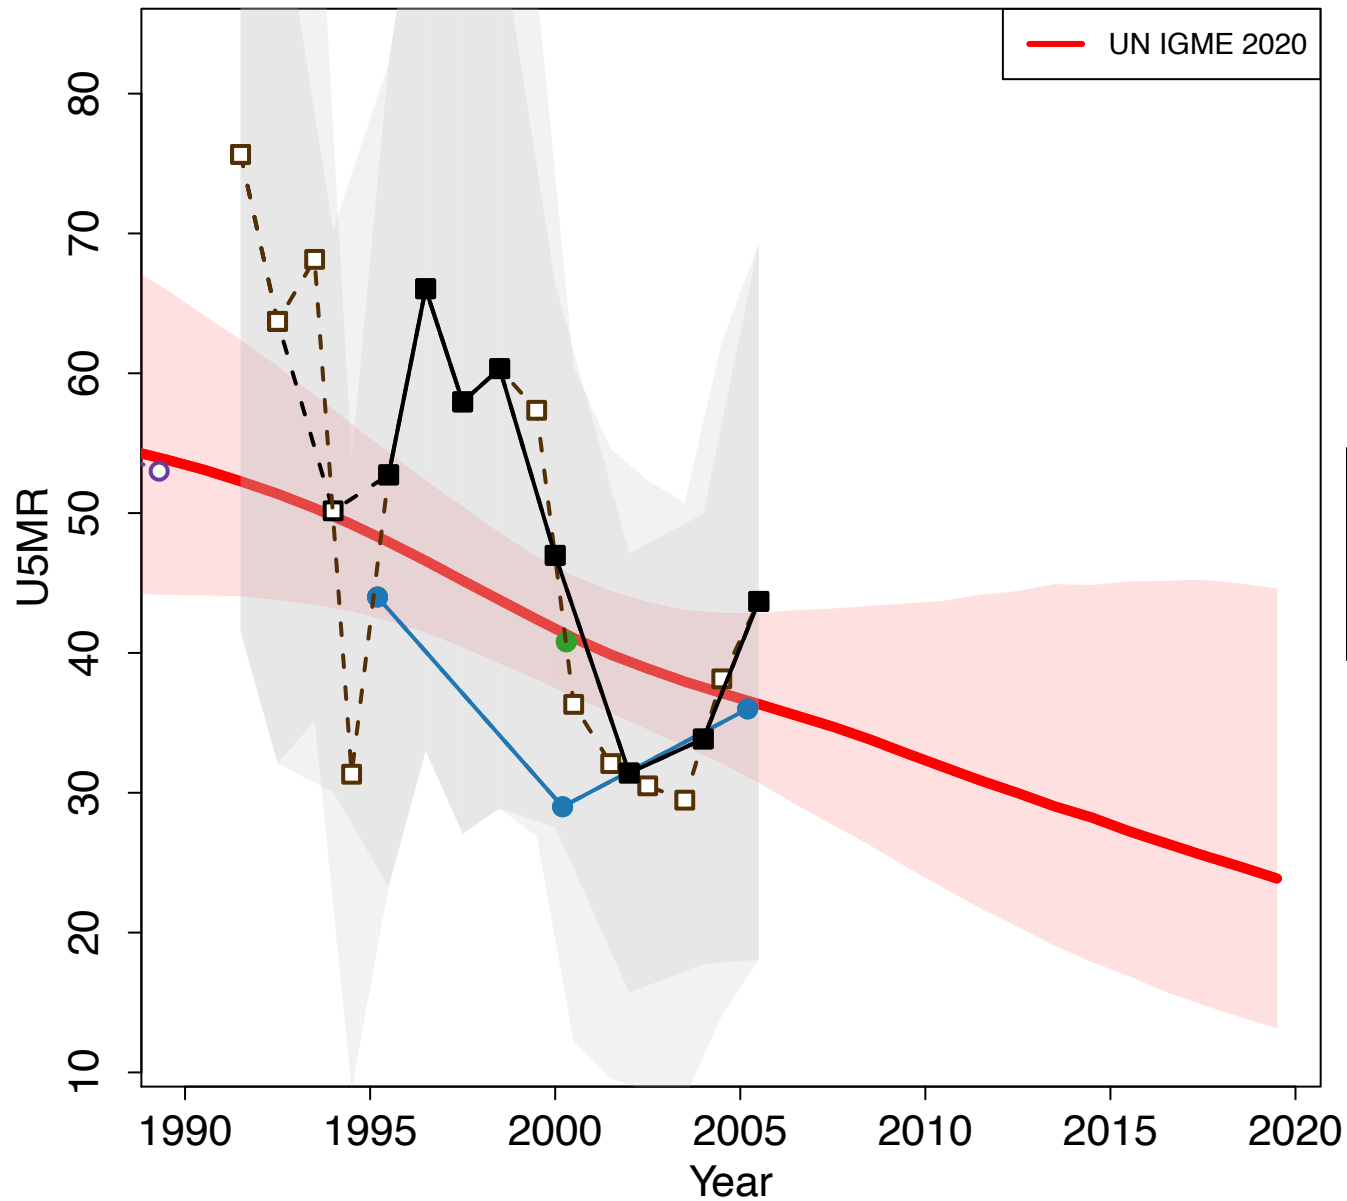

- Census 1991 (Census Indirect)
- Census 2002 (Census Direct)
- Demographic and Health Survey 2007 (Other DHS Direct)
- VR WHO
- VR WHO (Recalculated)



# Uganda

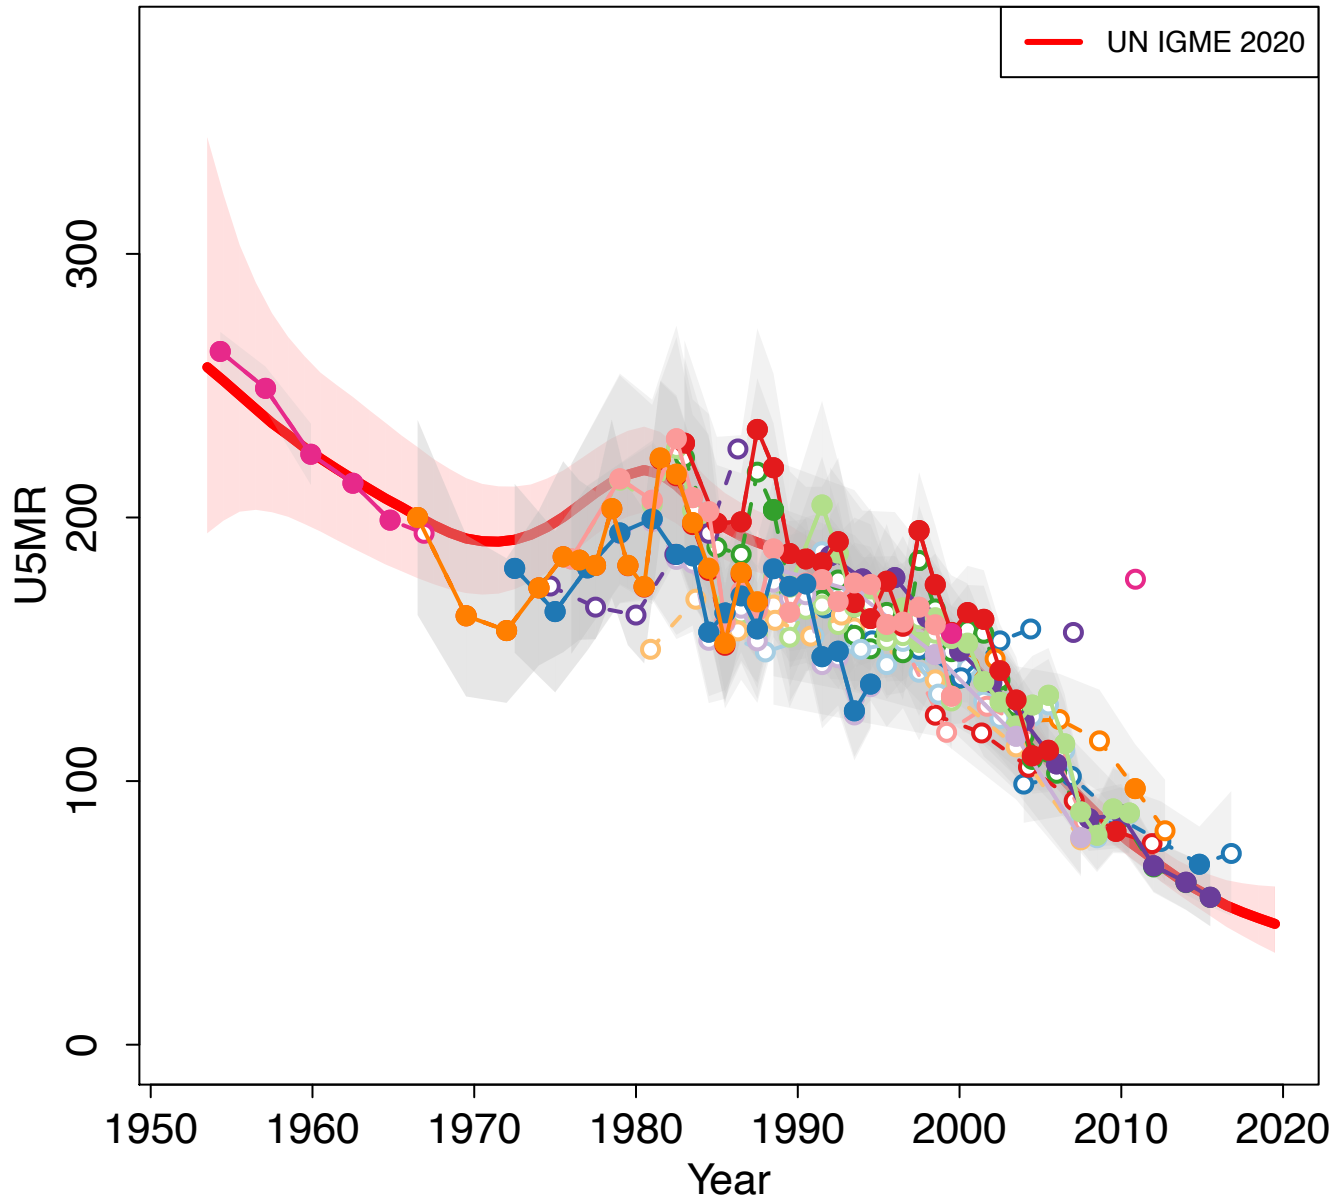

# Zoomed in

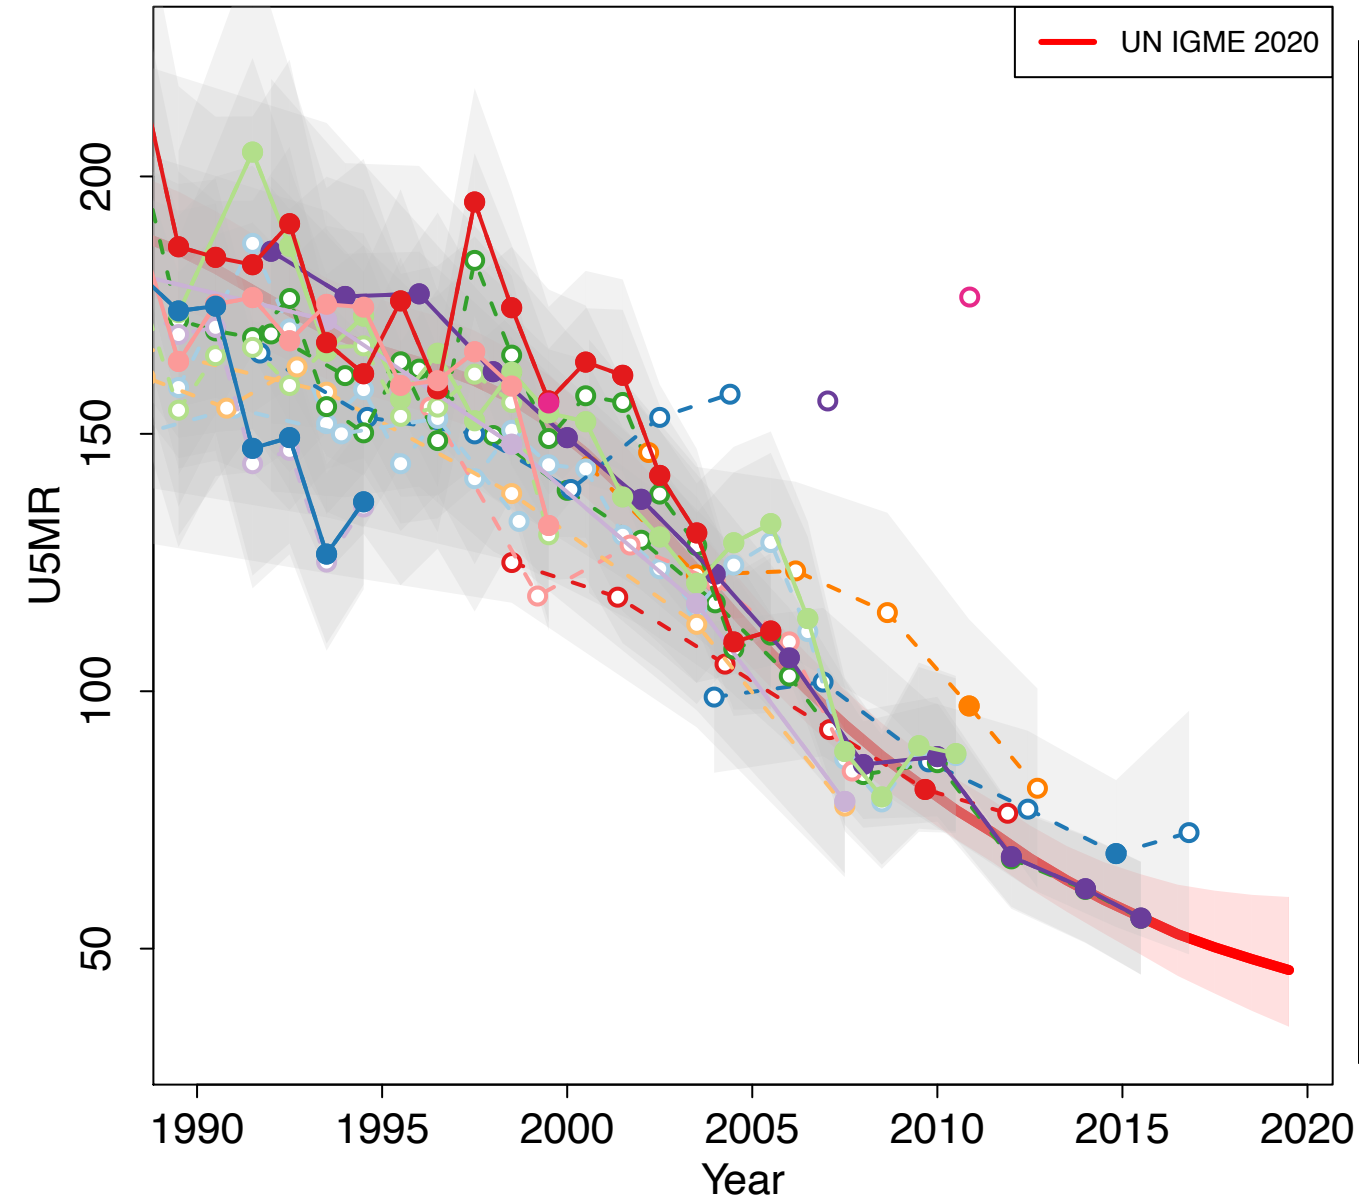

- Census 1969 (Census Indirect)
- Demographic and Health Survey (MM adjusted) 1988–1989 (DHS Direct)
- Demographic and Health Survey 1988–1989 (DHS Direct)
- Demographic and Health Survey 1988–1989 (DHS Indirect)
- Census 1991 (Census Direct)
- Demographic and Health Survey (MM adjusted) 1995 (DHS Direct)
- Demographic and Health Survey 1995 (DHS Direct)
- Demographic and Health Survey 1995 (DHS Indirect)
- Demographic and Health Survey (MM adjusted) 2000–2001 (DHS Direct)
- Demographic and Health Survey 2000–2001 (DHS Direct)
- Demographic and Health Survey 2000–2001 (DHS Indirect)
- Census 2002 (Census Direct)
- Census 2002 (Others Household Deaths)
- Demographic and Health Survey (MM adjusted) 2006 (DHS Direct)
- Demographic and Health Survey 2006 (Others Household Deaths)
- Demographic and Health Survey 2006 (DHS Direct)
- Demographic and Health Survey 2006 (DHS Indirect)
- Malaria Indicator Survey (MM adjusted) 2009–2010 (Other DHS Direct)
- Malaria Indicator Survey 2009–2010 (Other DHS Direct)
- Malaria Indicator Survey 2009–2010 (Other DHS Indirect)
- Demographic and Health Survey (MM adjusted) 2011 (DHS Direct)
- Demographic and Health Survey 2011 (DHS Direct)
- AIDS Indicator Survey 2011 (Others Household Deaths)
- Malaria Indicator Survey 2014–2015 (Other DHS Indirect)
- Census 2014 (Census Indirect)
- Demographic and Health Survey (MM adjusted) 2016 (DHS Direct)
- Demographic and Health Survey 2016 (DHS Direct)
- Malaria Indicator Survey 2018–2019 (Other DHS Indirect)



### Ukraine

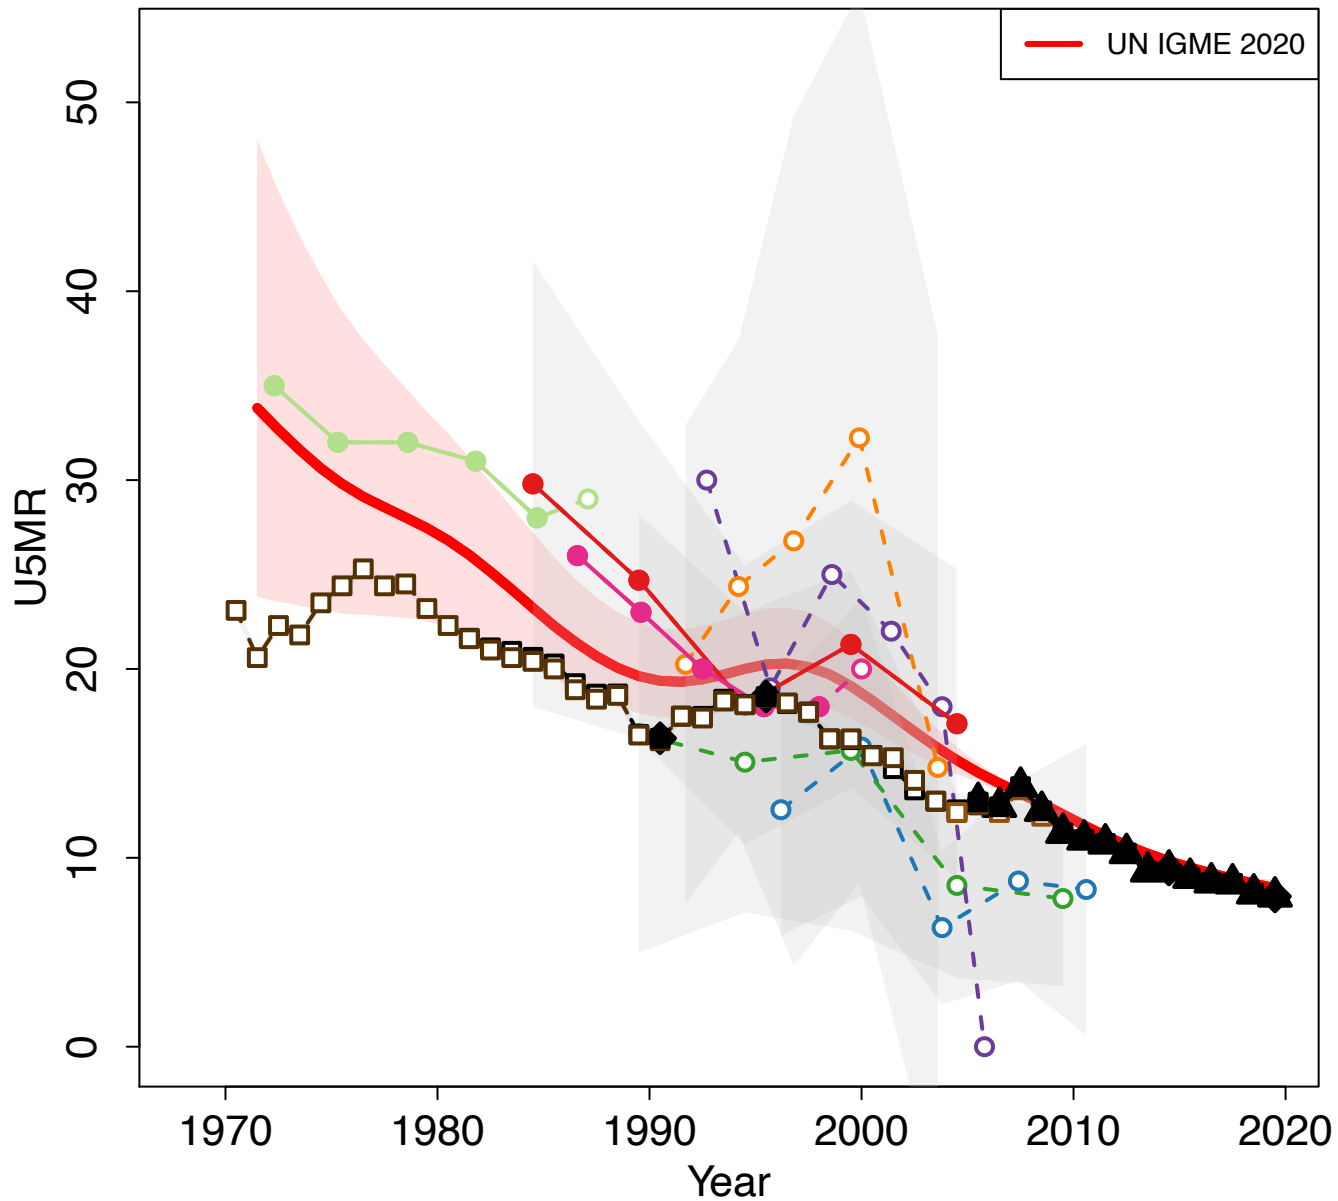

### Zoomed in

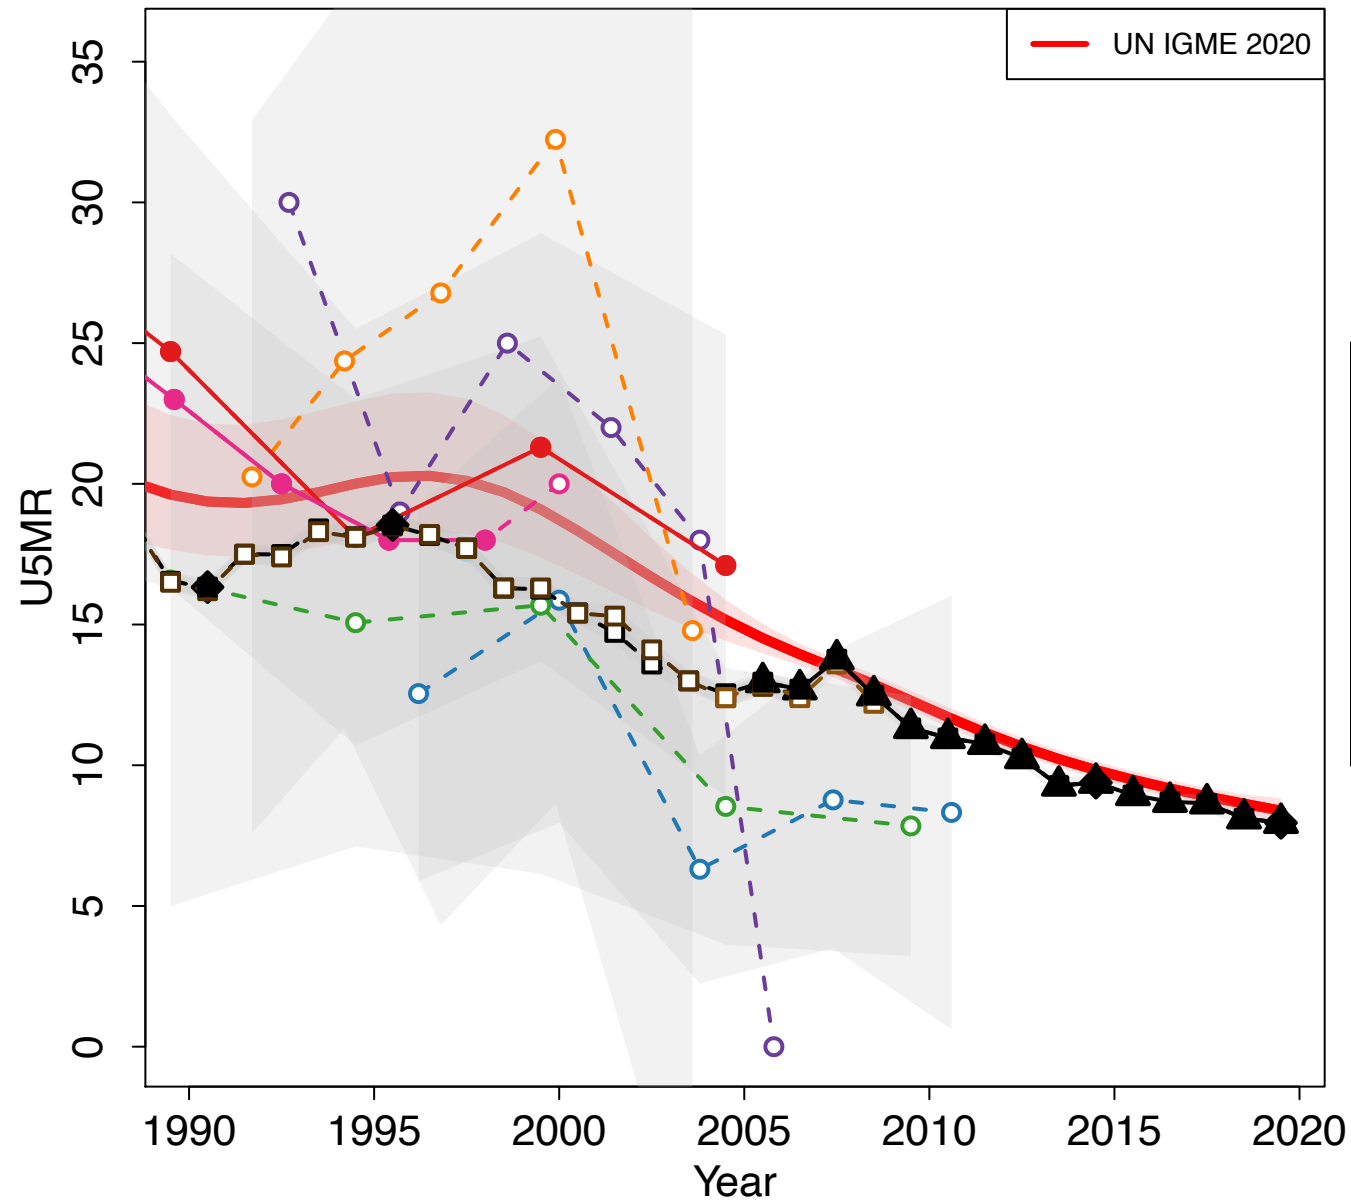

- Census 1989 (Census Indirect)
- Reproductive Health Survey 1999 (Others Direct)
- Census 2001 (Census Indirect)
- Multiple Indicator Cluster Survey 2005 (MICS Indirect)
- Demographic and Health Survey 2007 (DHS Direct)
- Demographic and Health Survey 2007 (DHS Indirect)
- Multiple Indicator Cluster Survey 2012 (MICS Direct)
- Multiple Indicator Cluster Survey 2012 (MICS Indirect)
- VR Vital Registration Data from State Statistics Committee of Ukraine
- VR Vital Registration Data from Human Mortality Database
- VR WHO

# United Arab Emirates

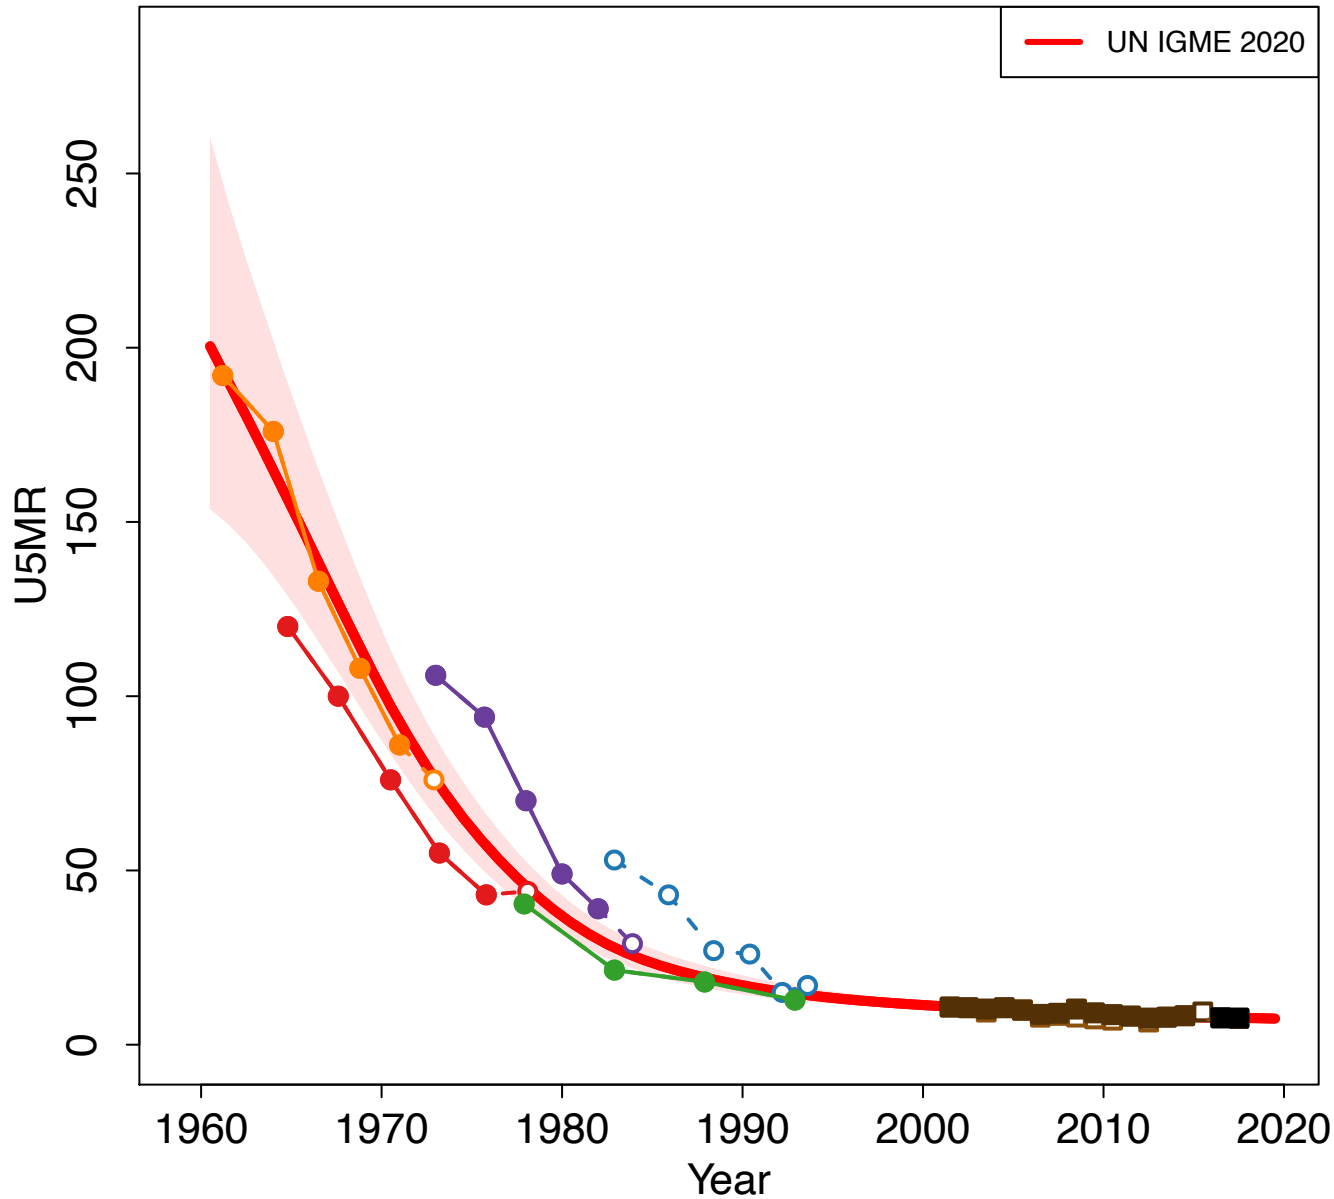

# Zoomed in

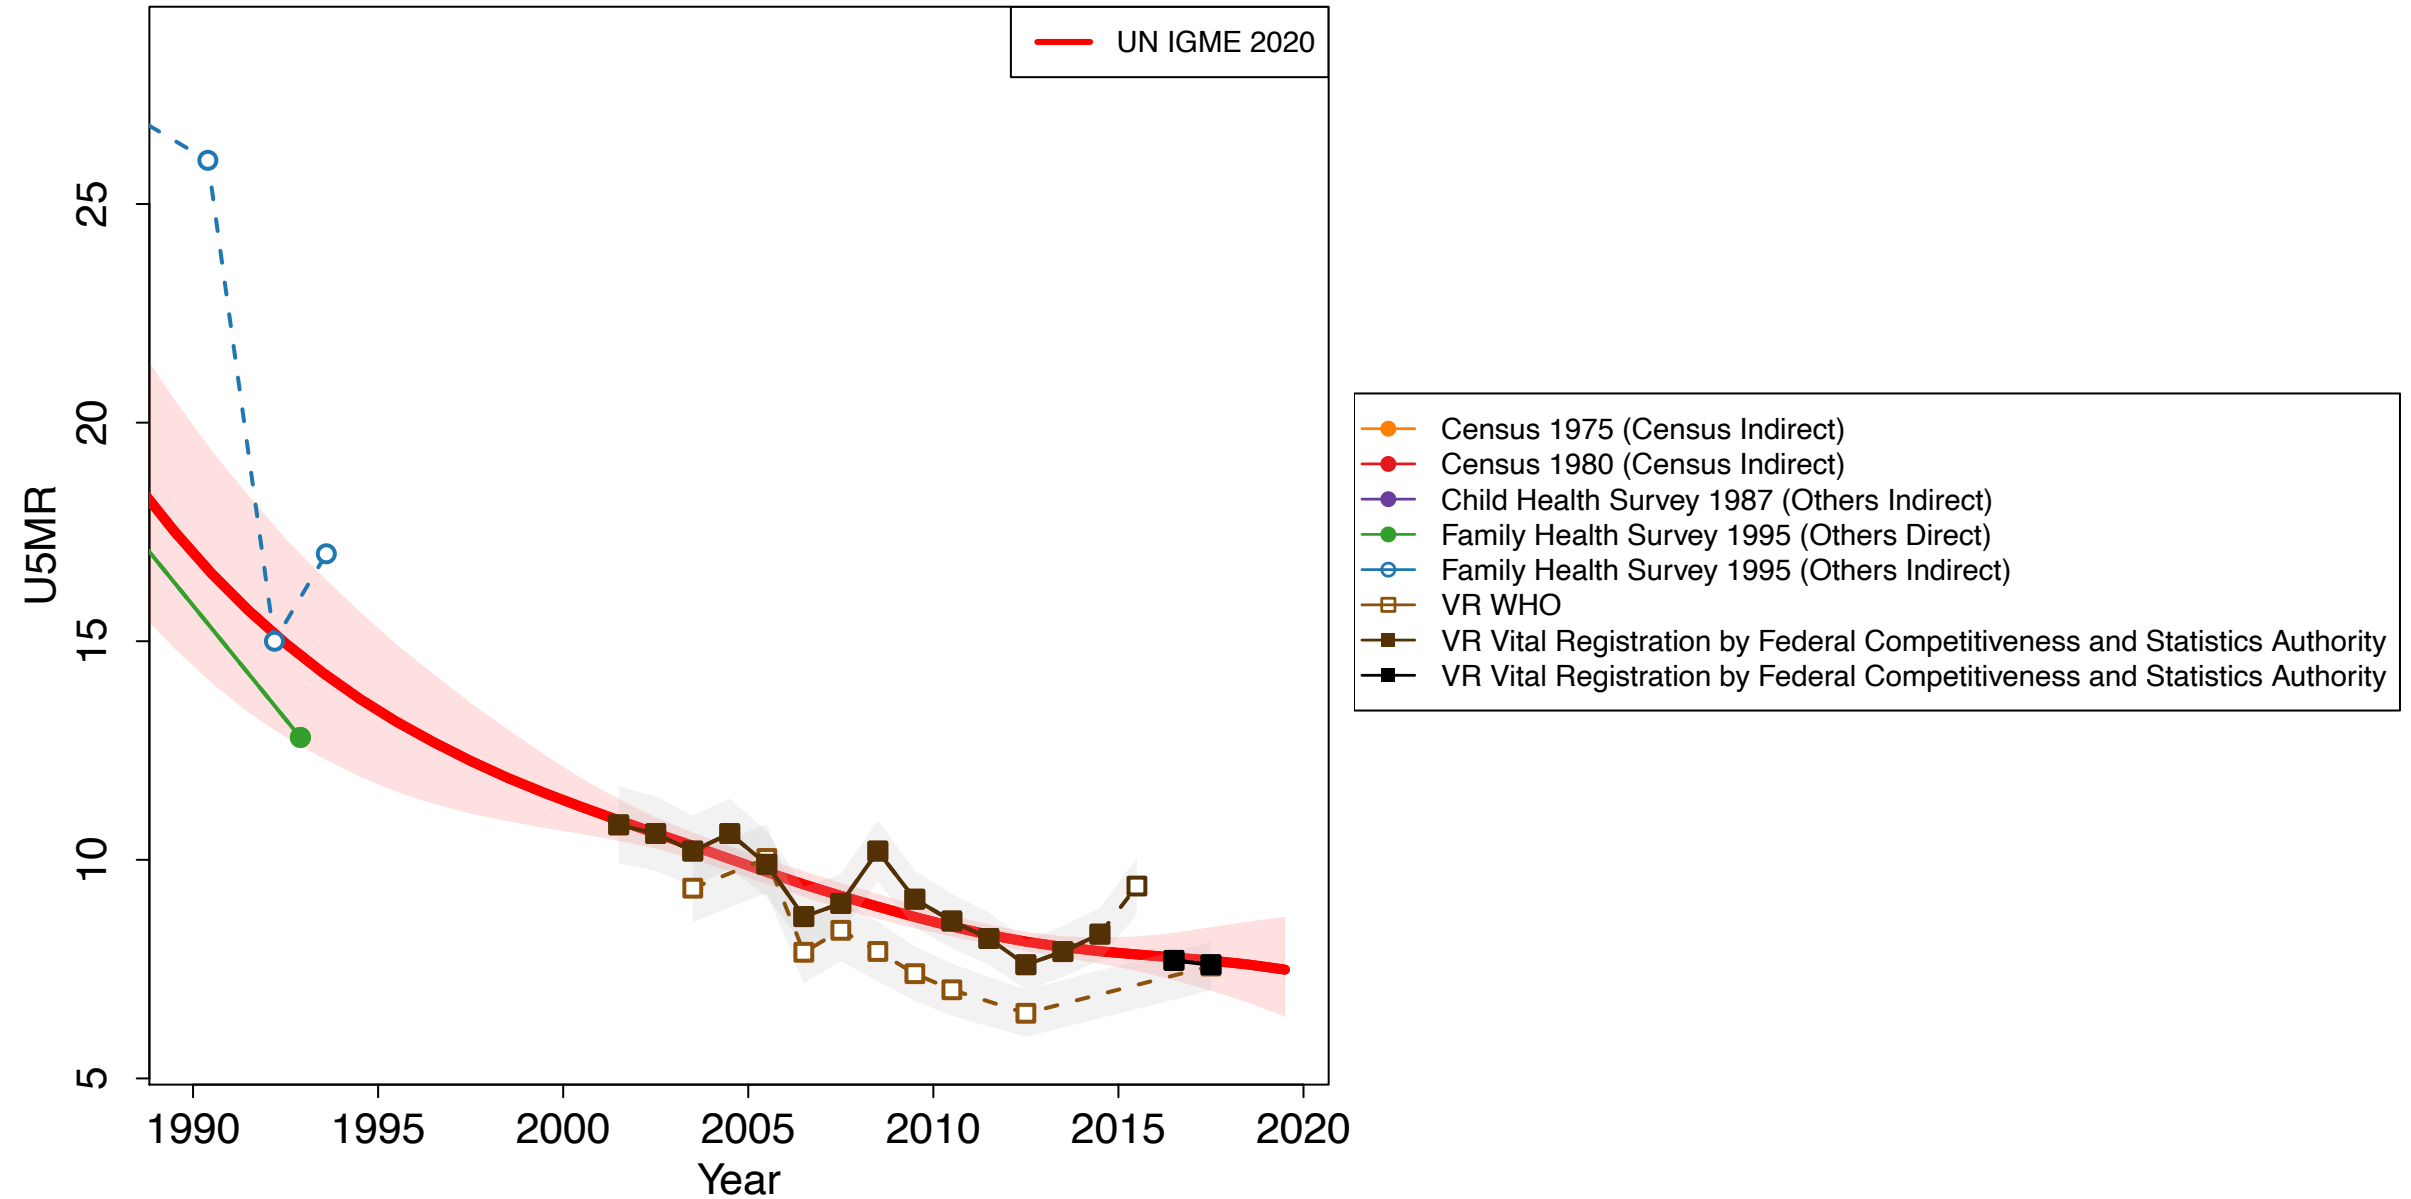

### United Kingdom

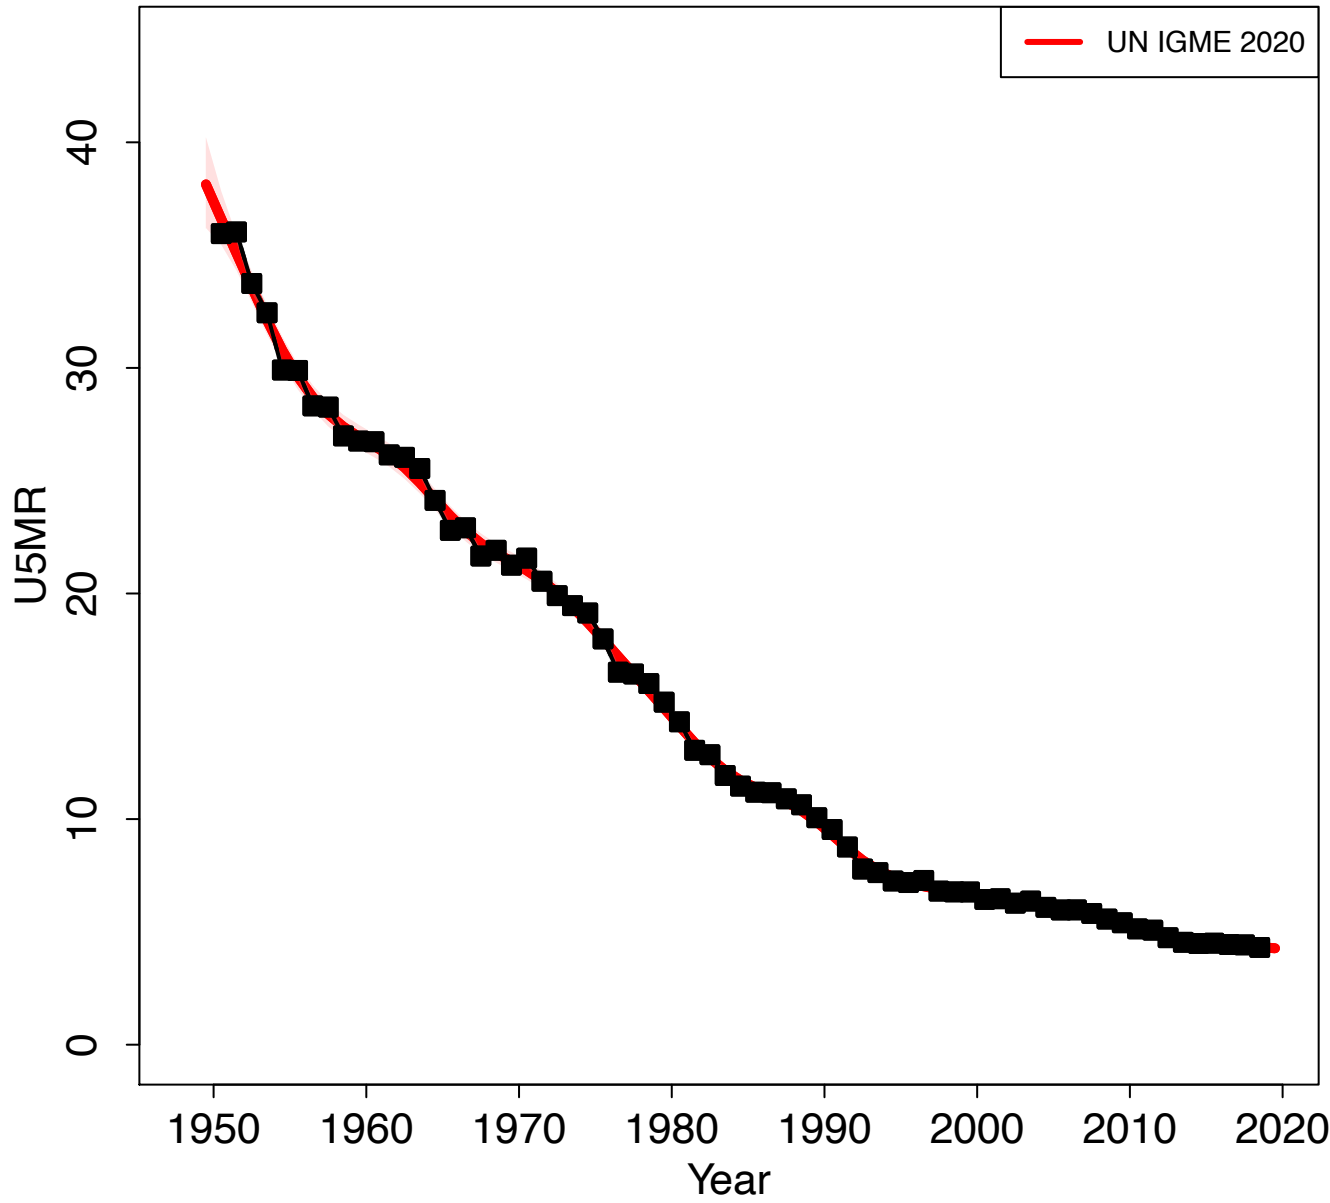

### Zoomed in

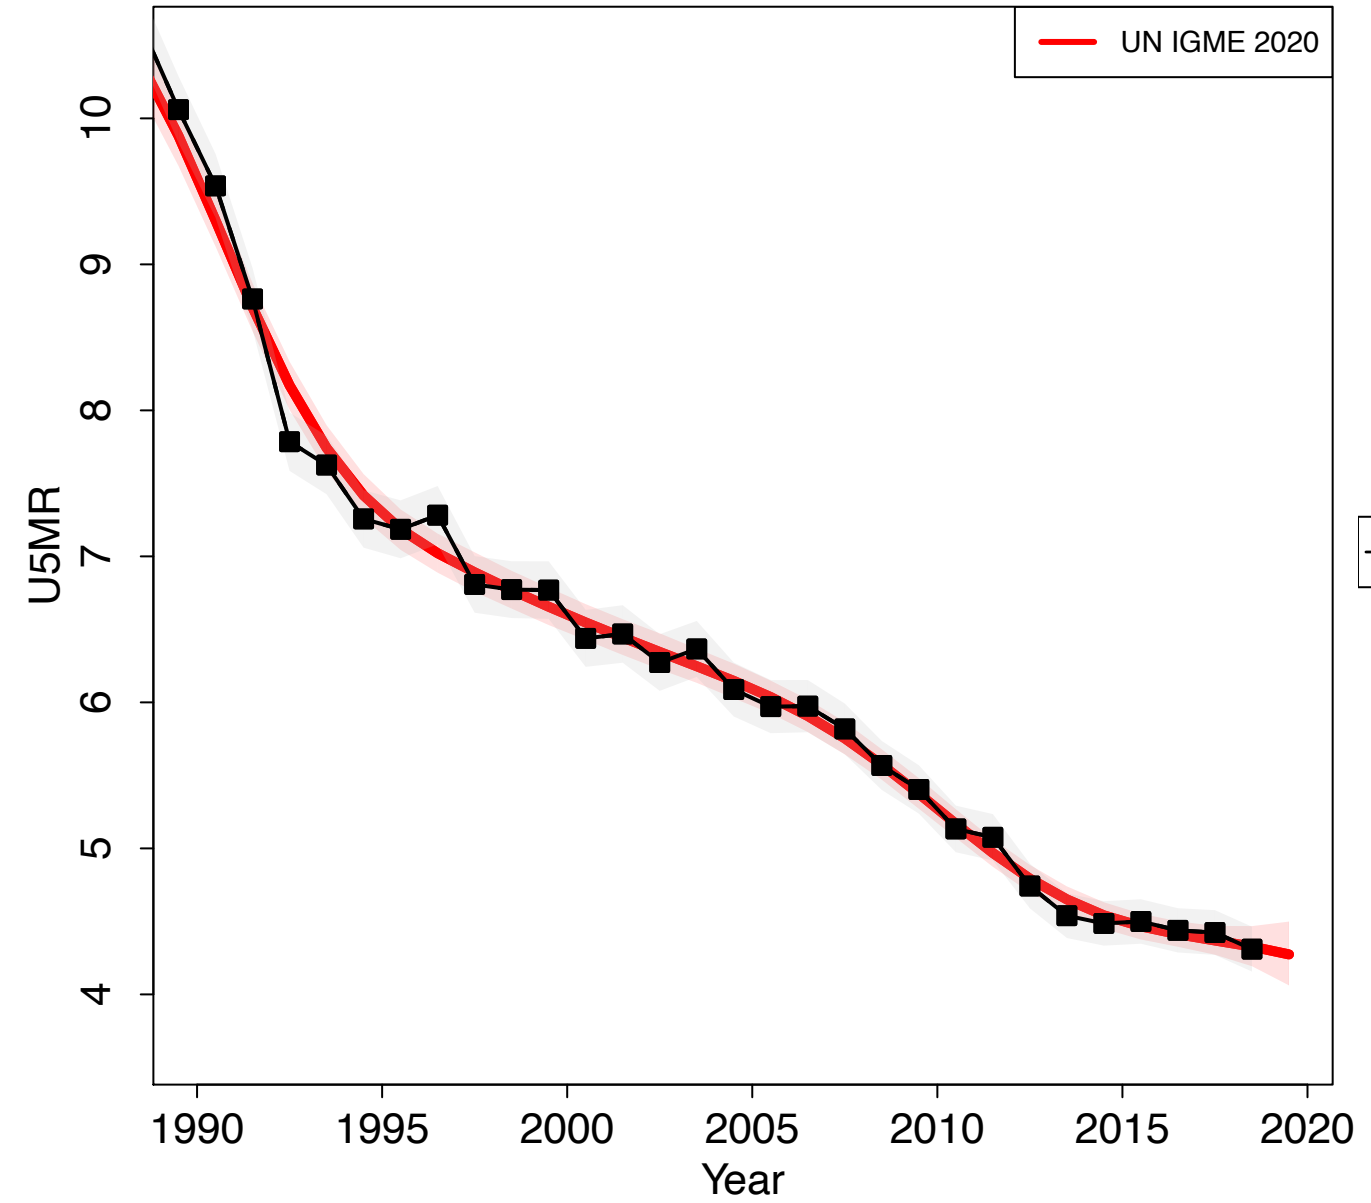

### United States of America

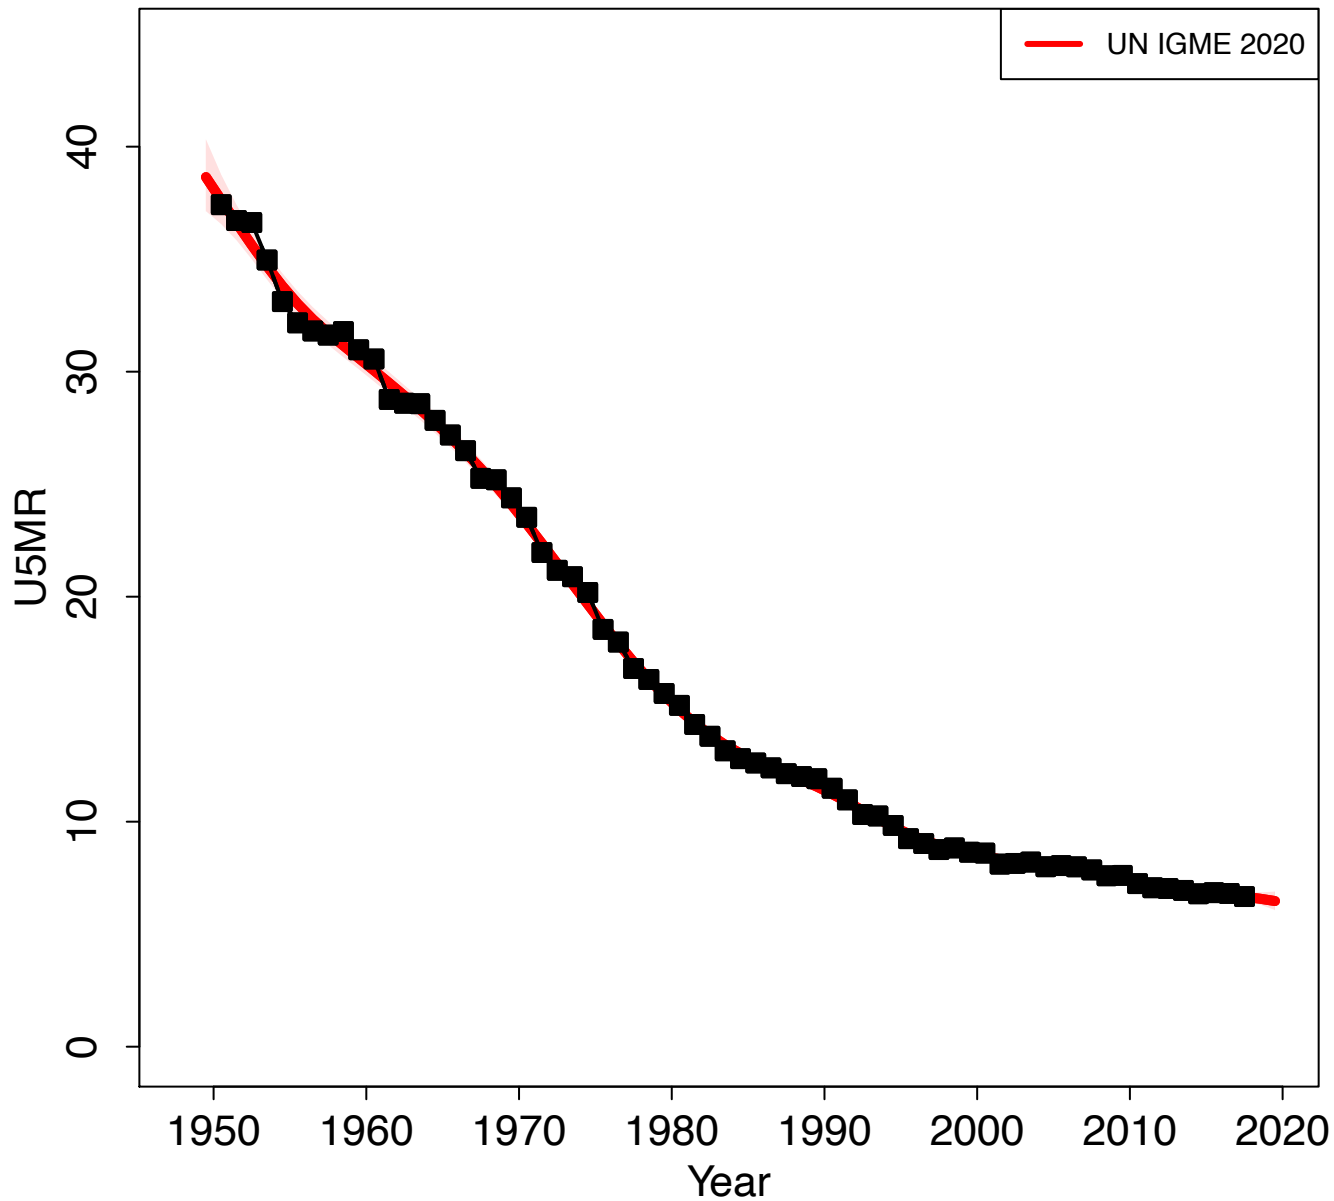

### Zoomed in

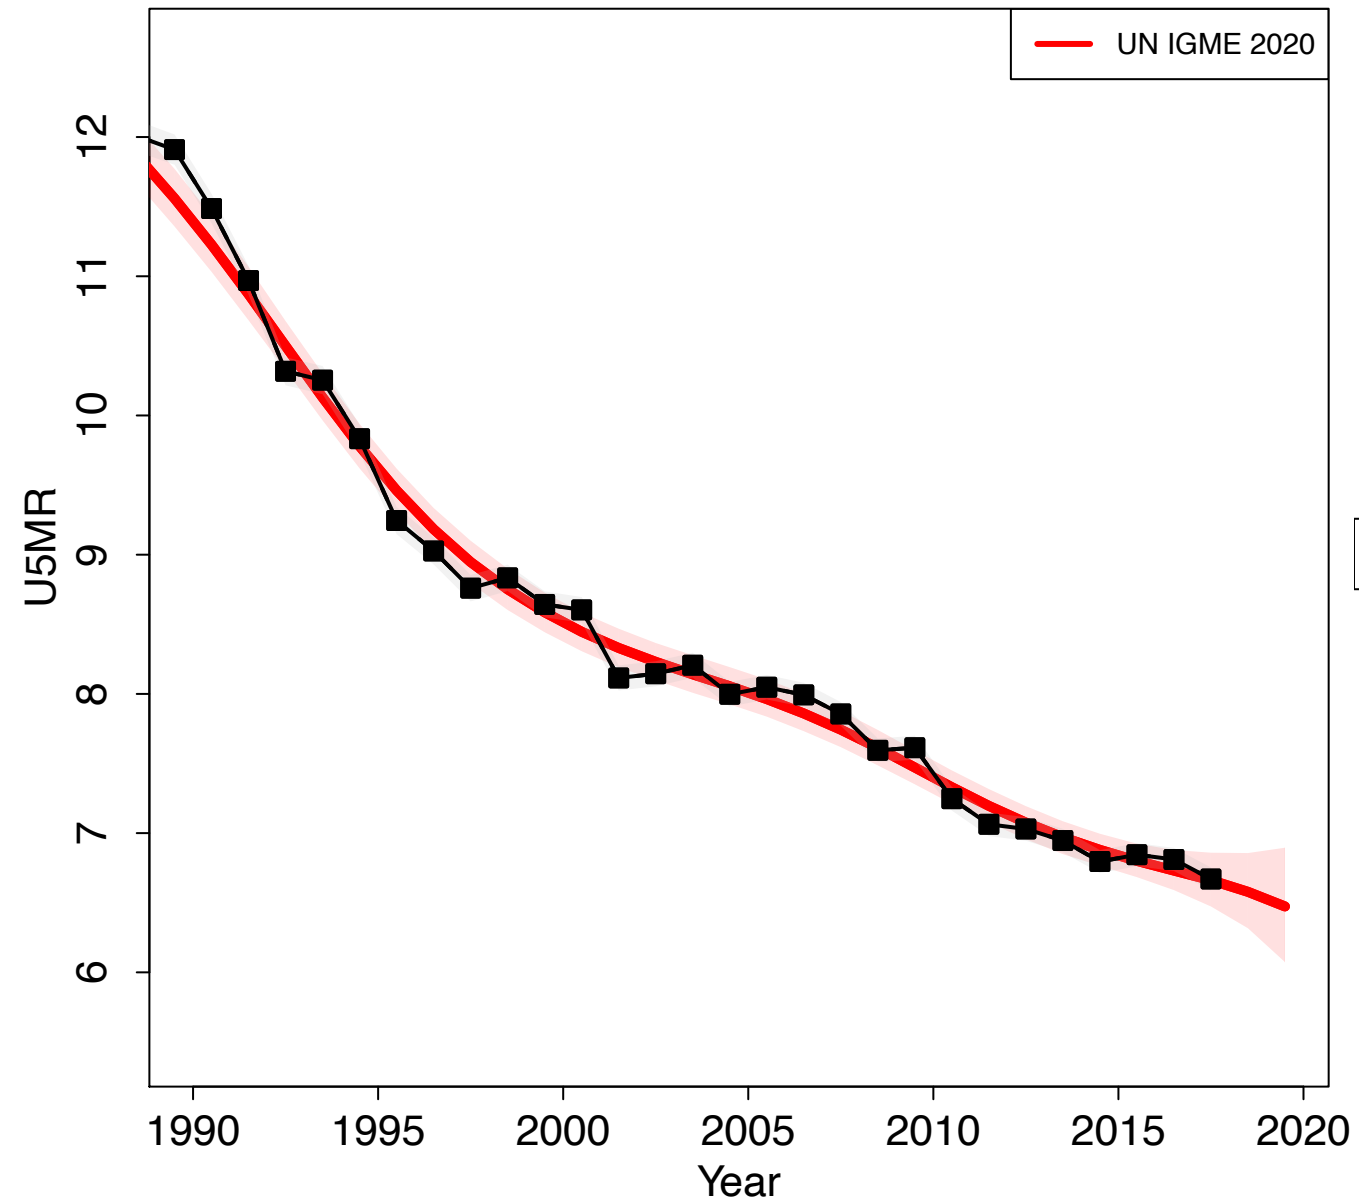

### Uruguay

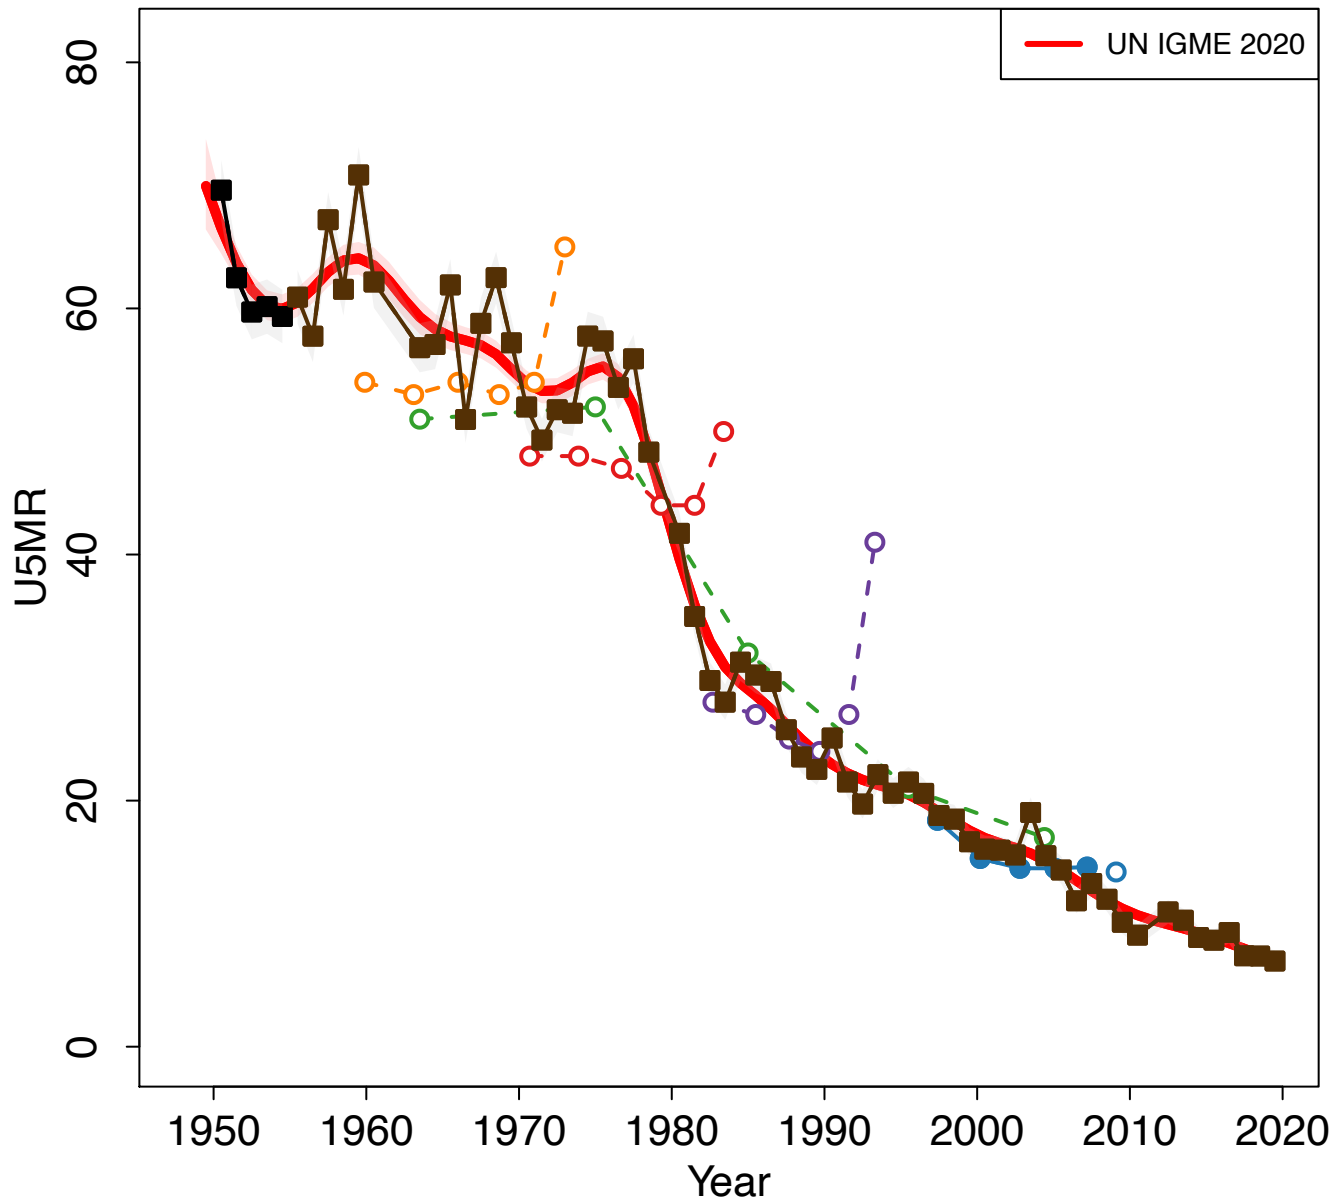

### Zoomed in

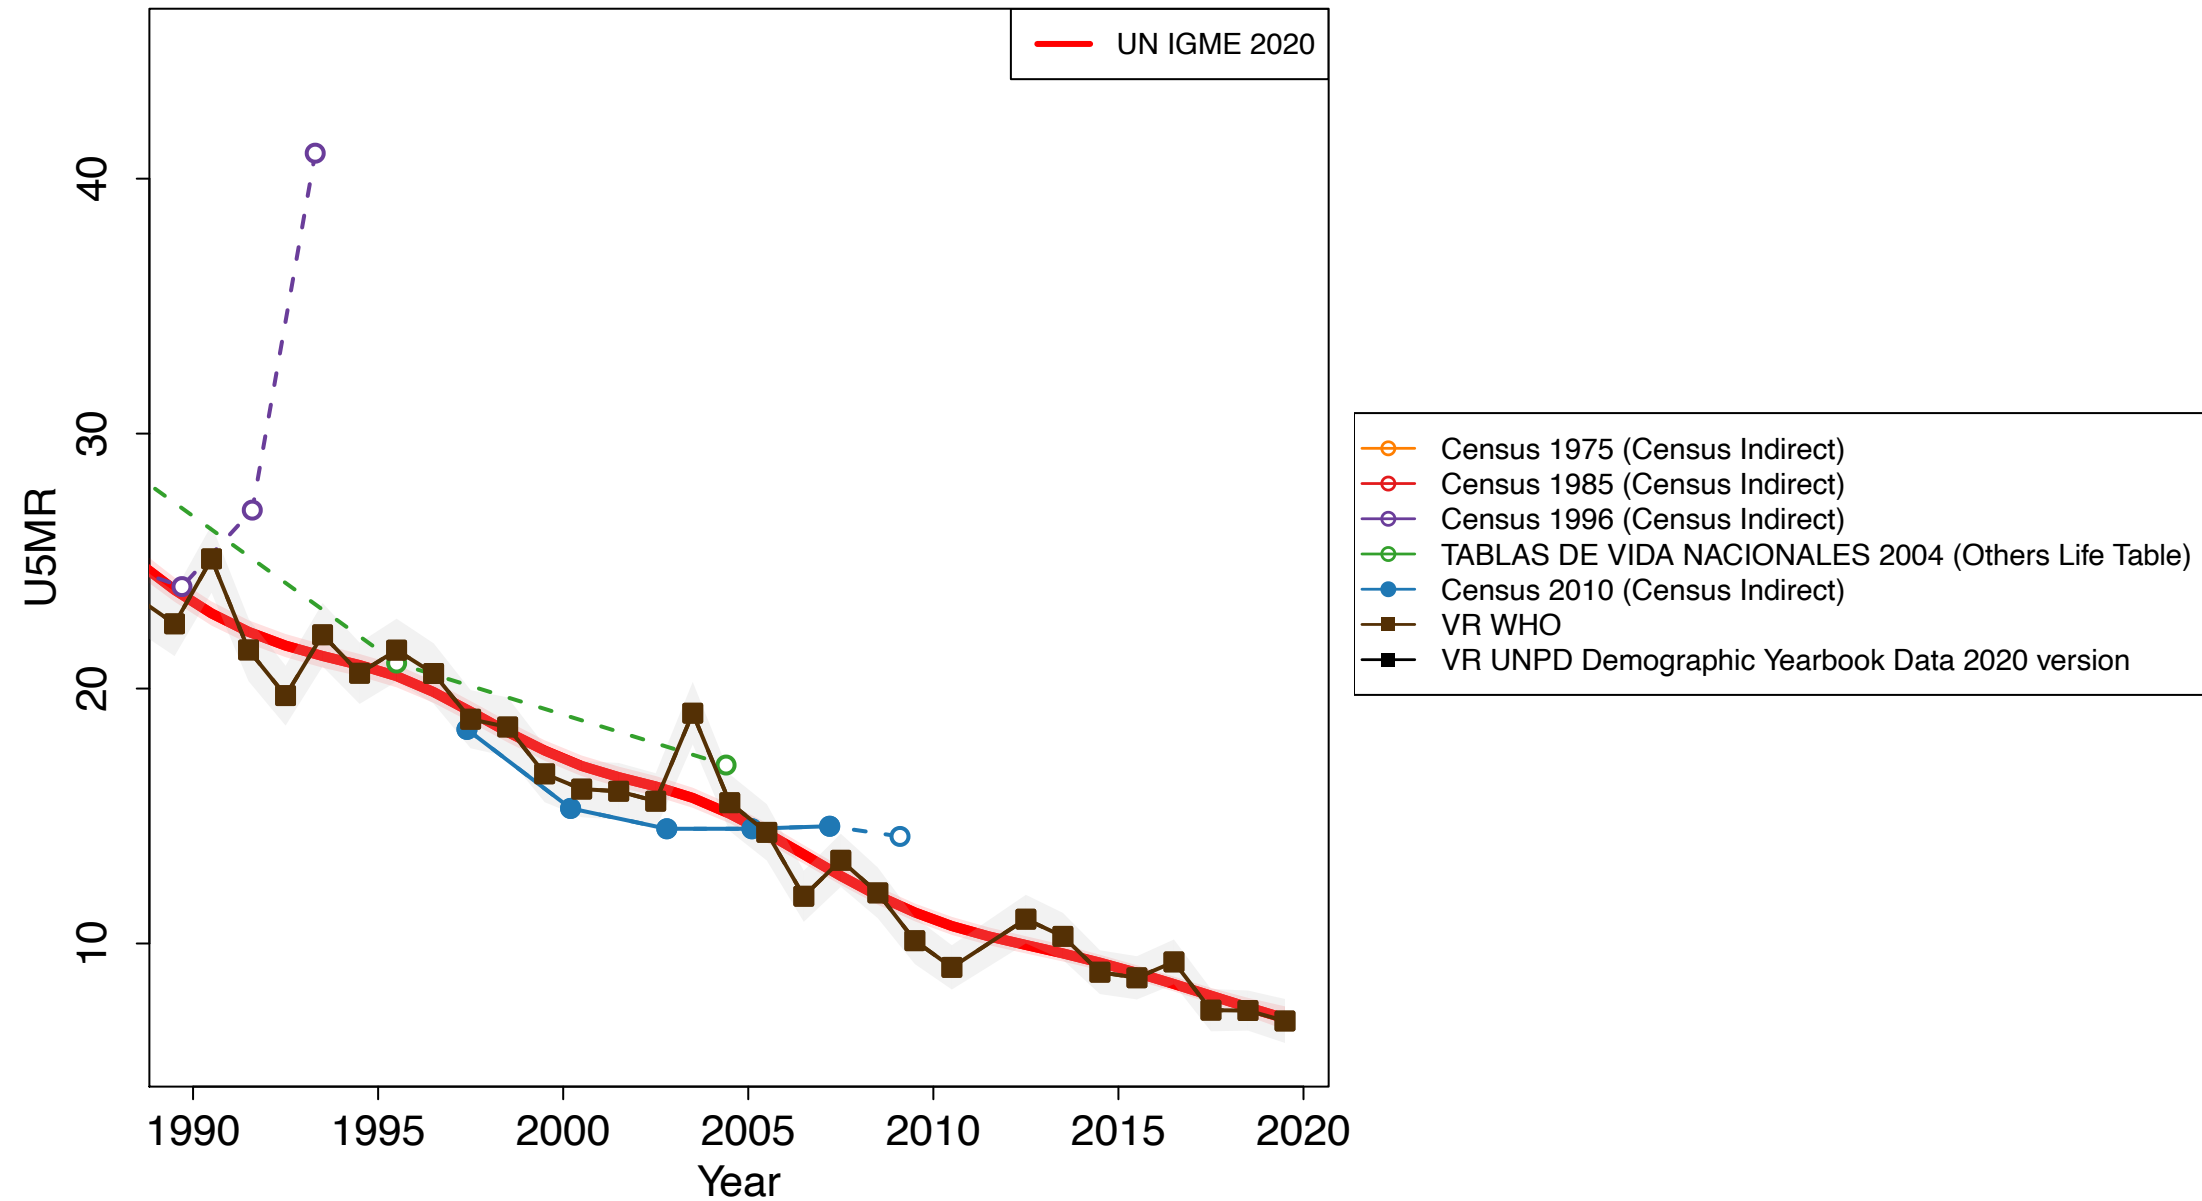

### Uzbekistan

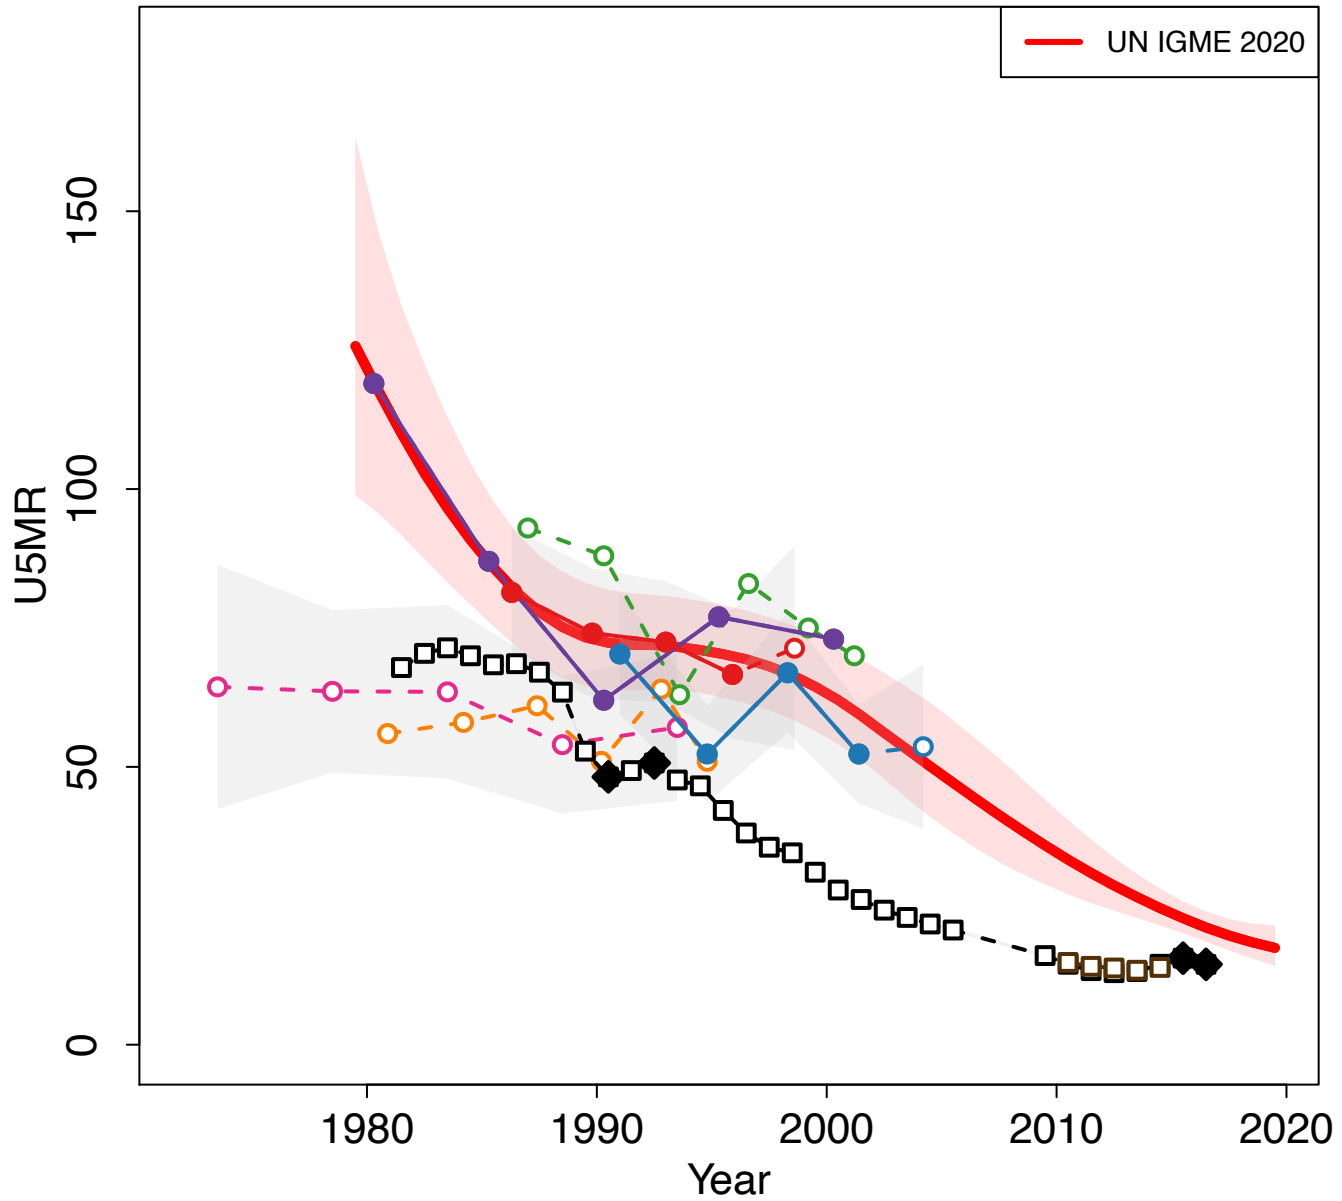

### Zoomed in

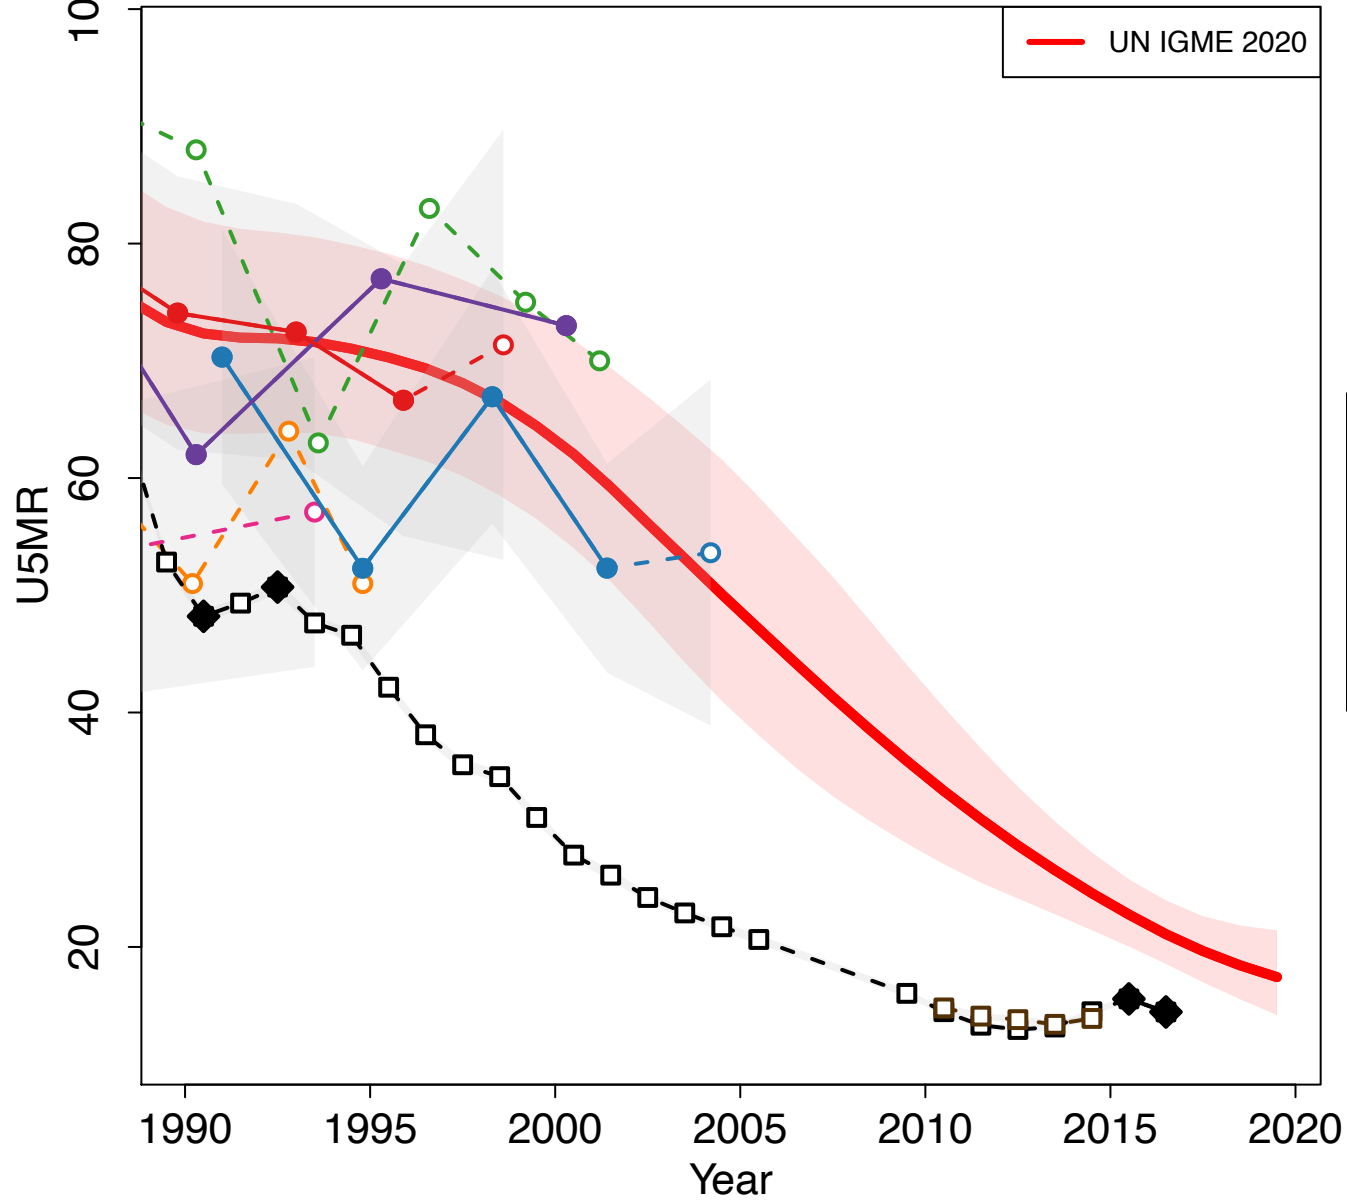

- Demographic and Health Survey 1996 (DHS Direct)
- Demographic and Health Survey 1996 (DHS Indirect)
- Multiple Indicator Cluster Survey 2000 (MICS Indirect)
- Demographic and Health Survey 2002 (Other DHS Direct)
- Demographic and Health Survey 2002 (Other DHS Indirect)
- Multiple Indicator Cluster Survey 2006 (MICS Indirect)
- VR Vital registration from National Statistical Office
- VR WHO

# Vanuatu

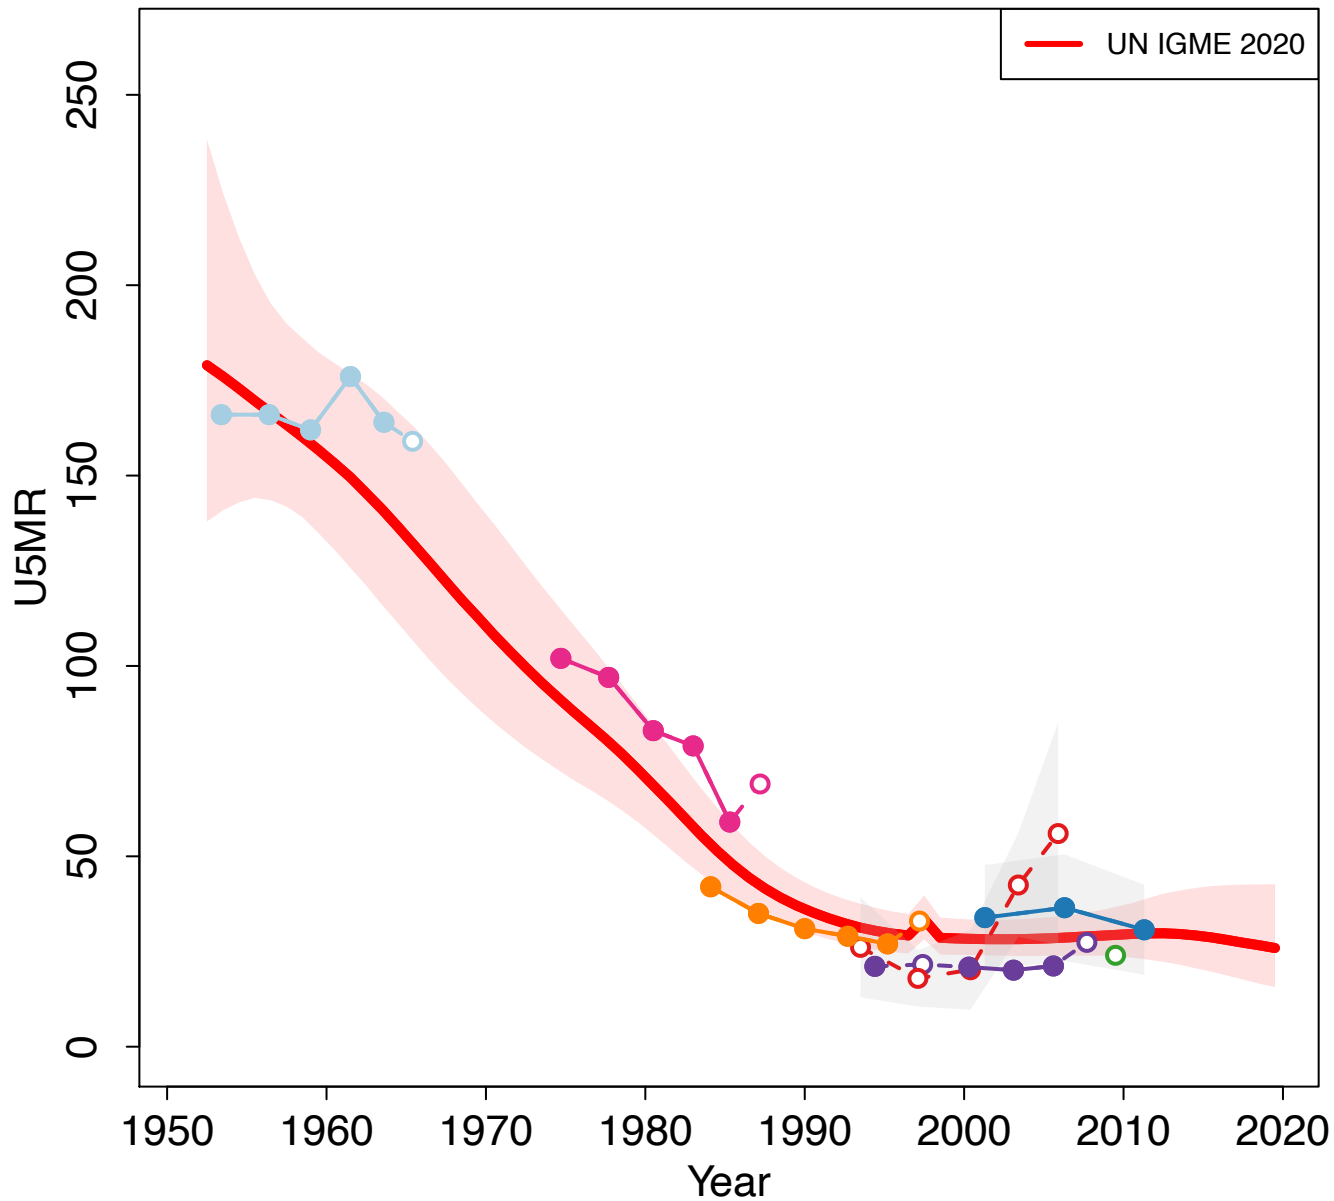

# Zoomed in

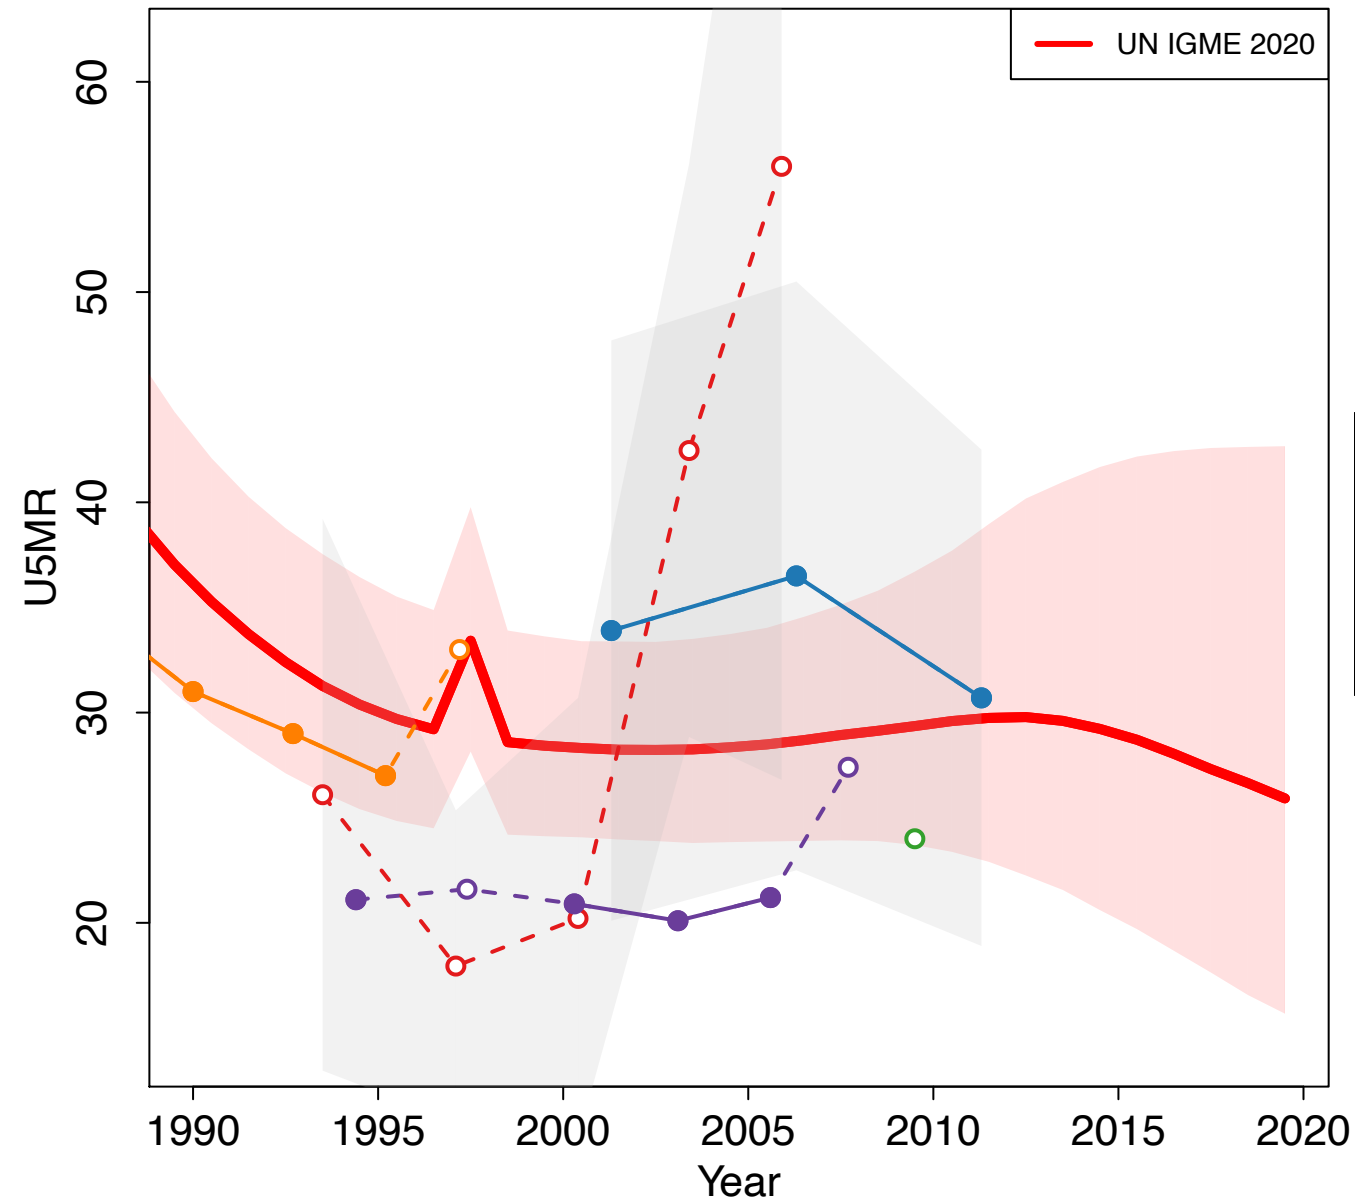

- Census 1967 (Census Indirect)
- Census 1989 (Census Indirect)
- Census 1999 (Census Indirect)
- Multiple Indicator Cluster Survey 2007–2008 (MICS Indirect)
- Census 2009 (Census Indirect)
- Census 2009 (Others Household Deaths)
- Demographic and Health Survey 2013 (Other DHS Direct)

### Venezuela (Bolivarian Republic of)

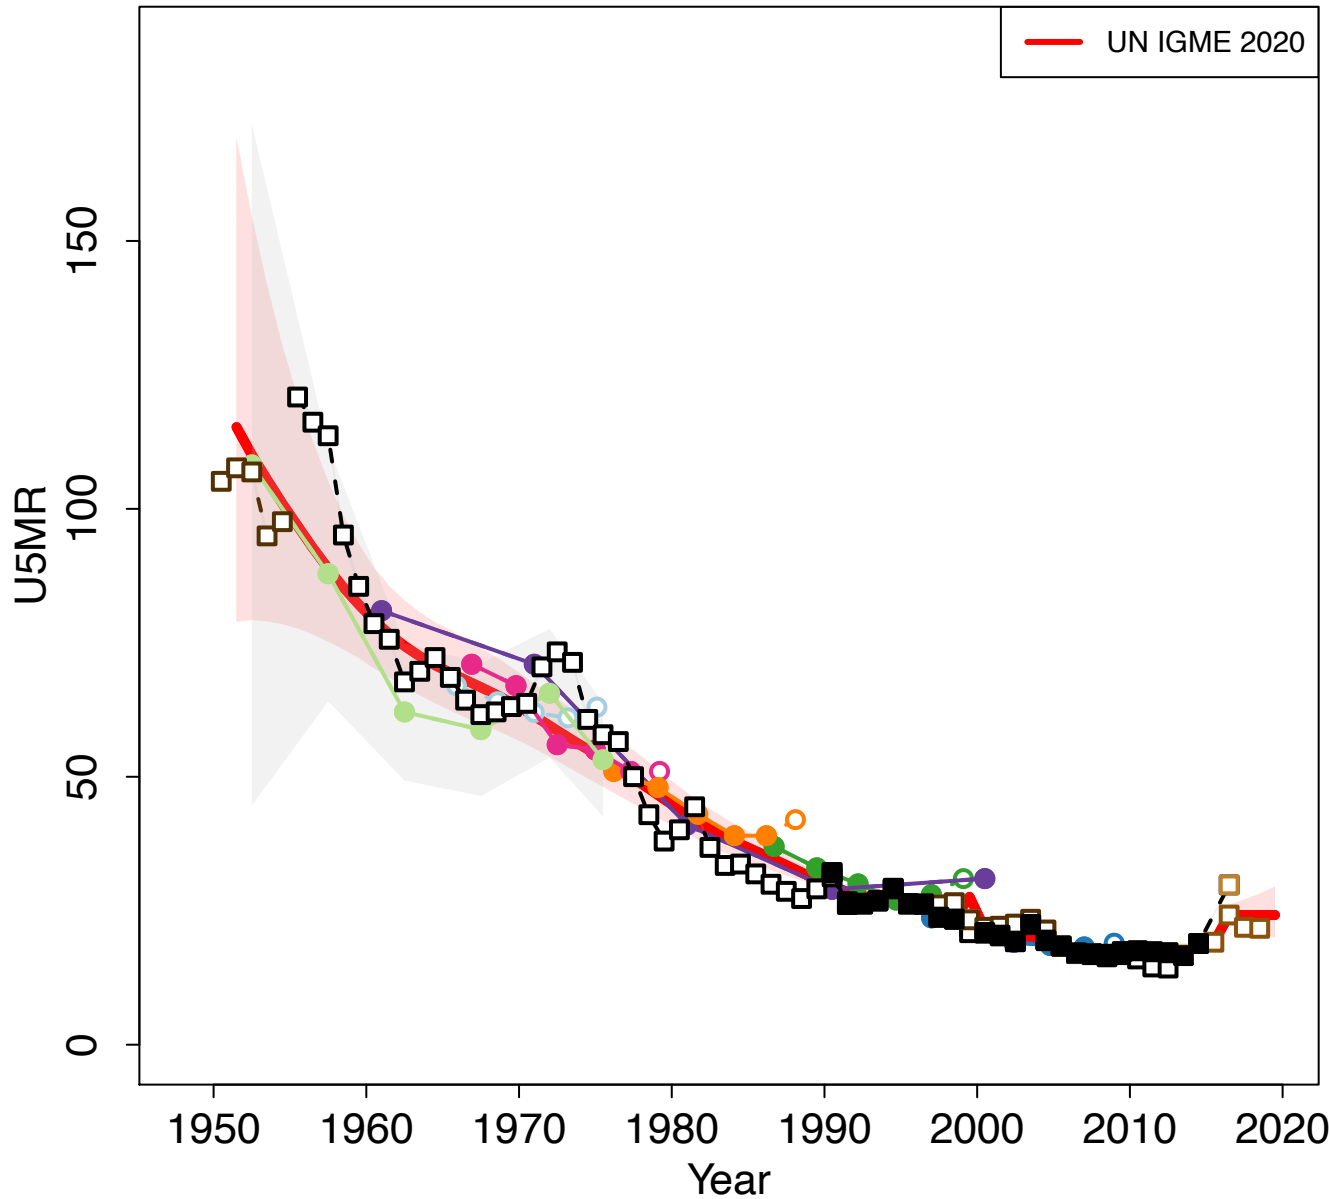

### Zoomed in

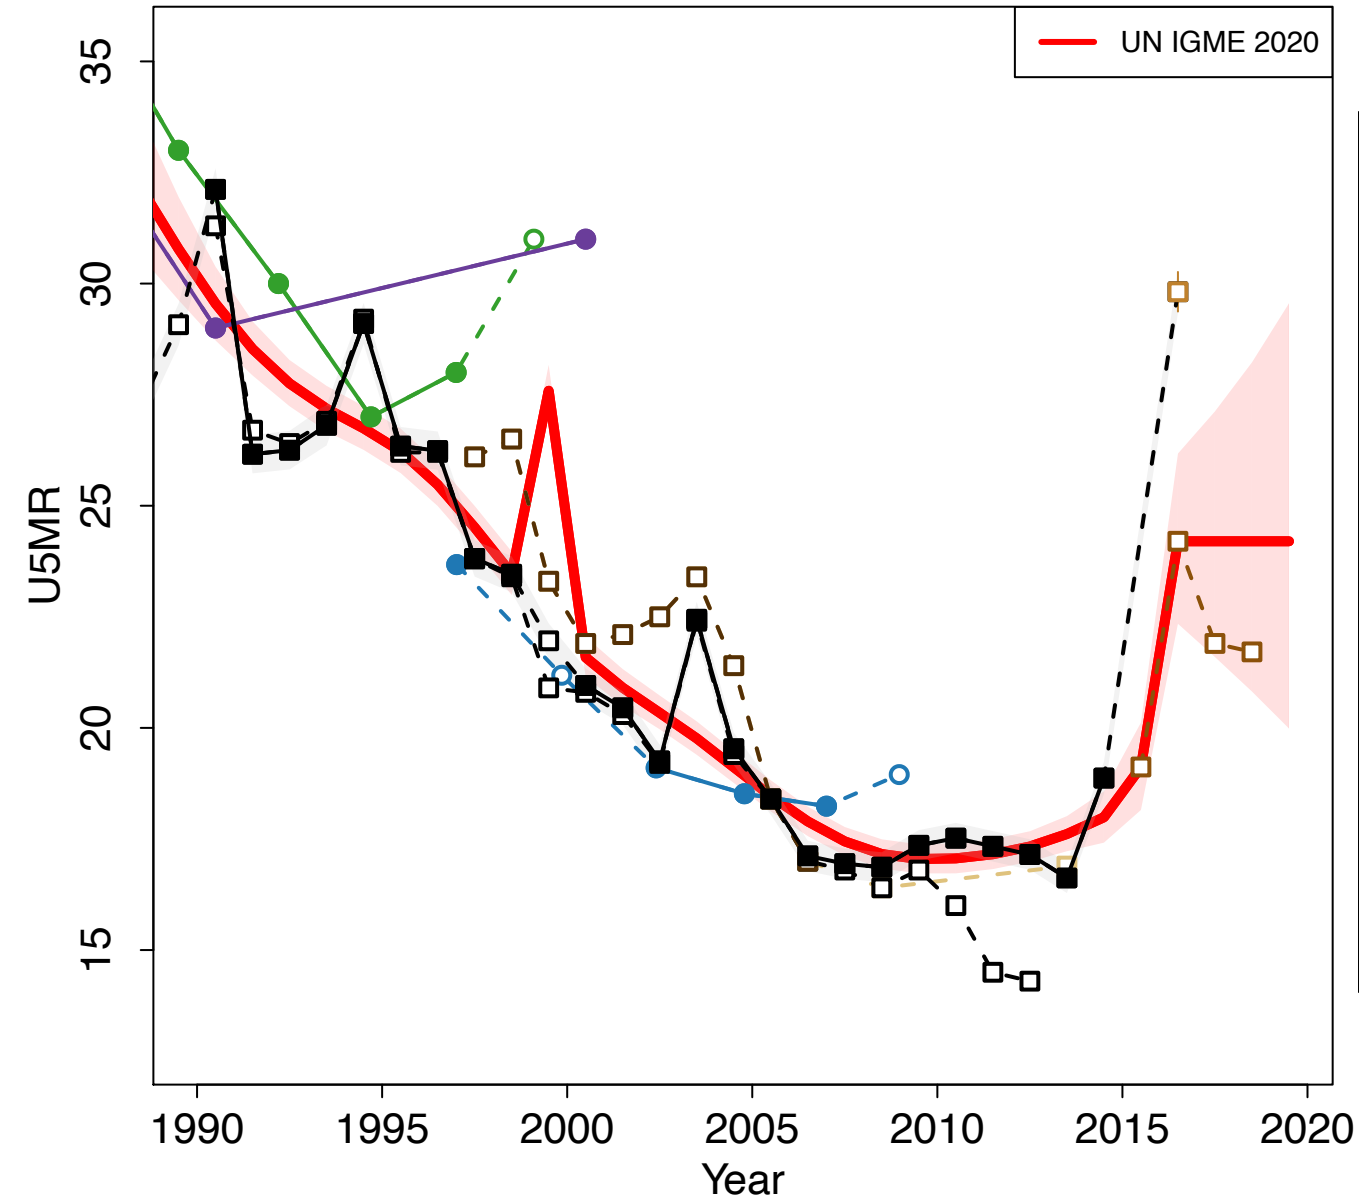

- World Fertility Survey 1977 (Other DHS Direct)
- World Fertility Survey 1977 (Other DHS Indirect)
- Census 1981 (Census Indirect)
- Census 1990 (Census Indirect)
- National Population and Family Survey 1998 (Others Direct)
- TABLAS DE VIDA NACIONALES 2000 (Others Life Table)
- Census 2001 (Census Indirect)
- Census 2011 (Census Indirect)
- VR Vital Registration Data from Ministerio del Poder Popular para la Planificacion y Desarrollo (May 2009)
- VR Vital Registration data from Instituto Nacional de Estadistica
- VR Vital Registration Data from Ministerio del Poder Popular para la Salud
- VR VR submitted to UN IGME in 2018
- VR Provisional adjusted data from Ministerio del Poder Popular para la Salud and Instituto Nacional de Estadistica
- VR UNPD Demographic Yearbook Data 2020 version
- VR WHO



### Viet Nam

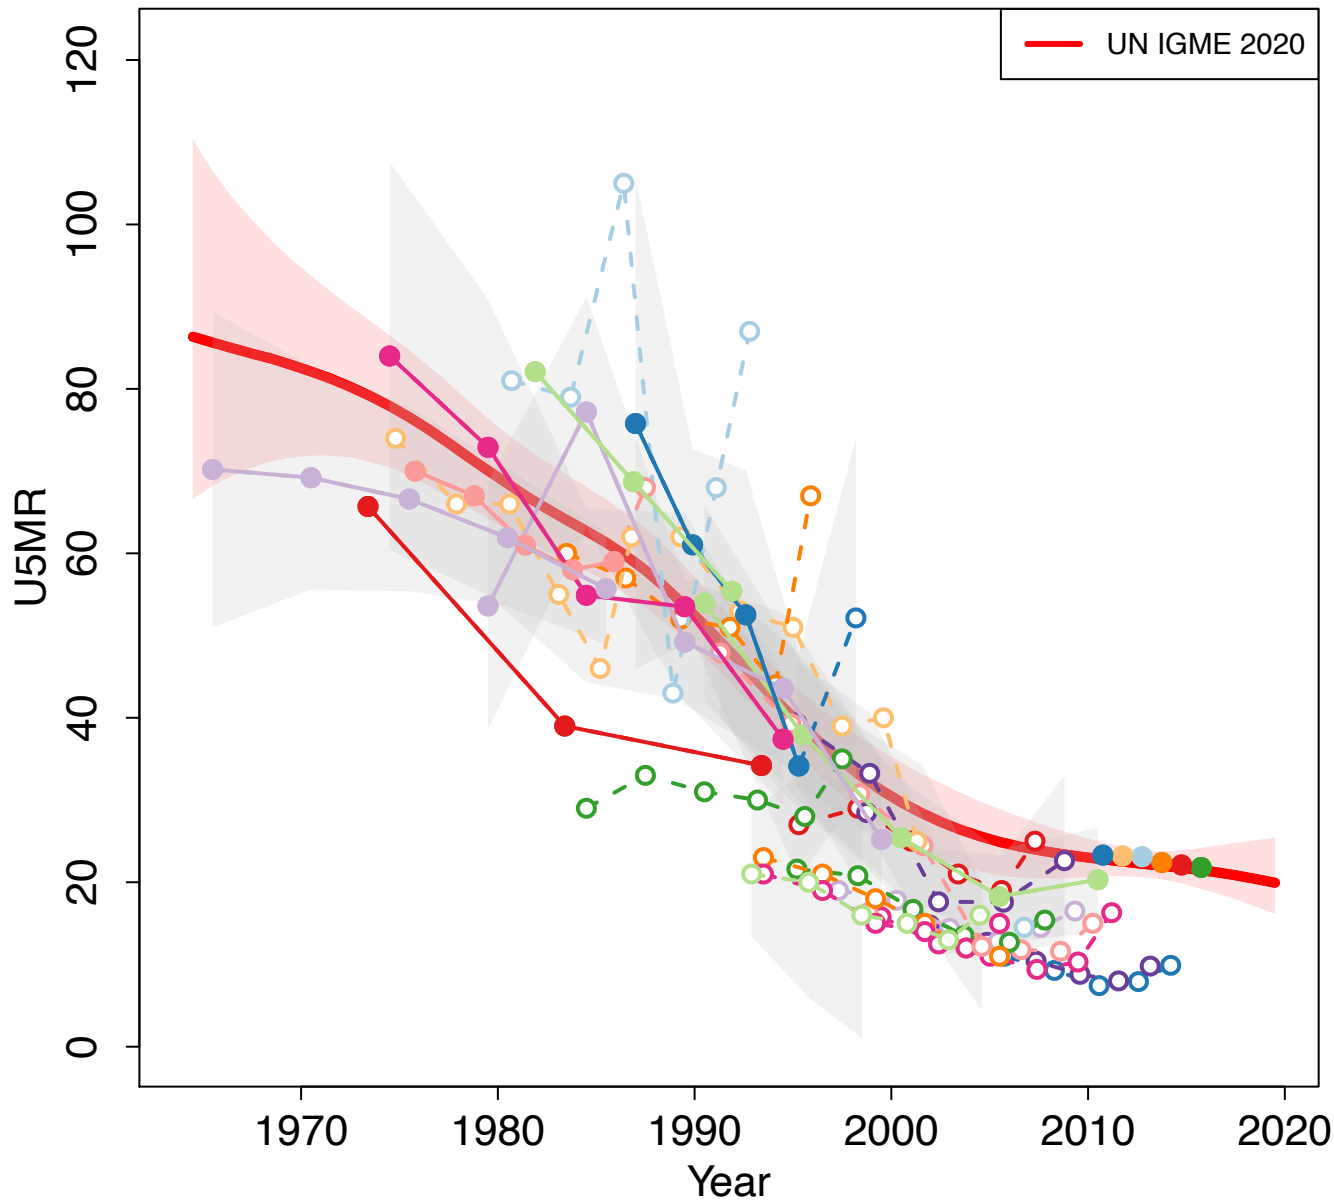

### Zoomed in

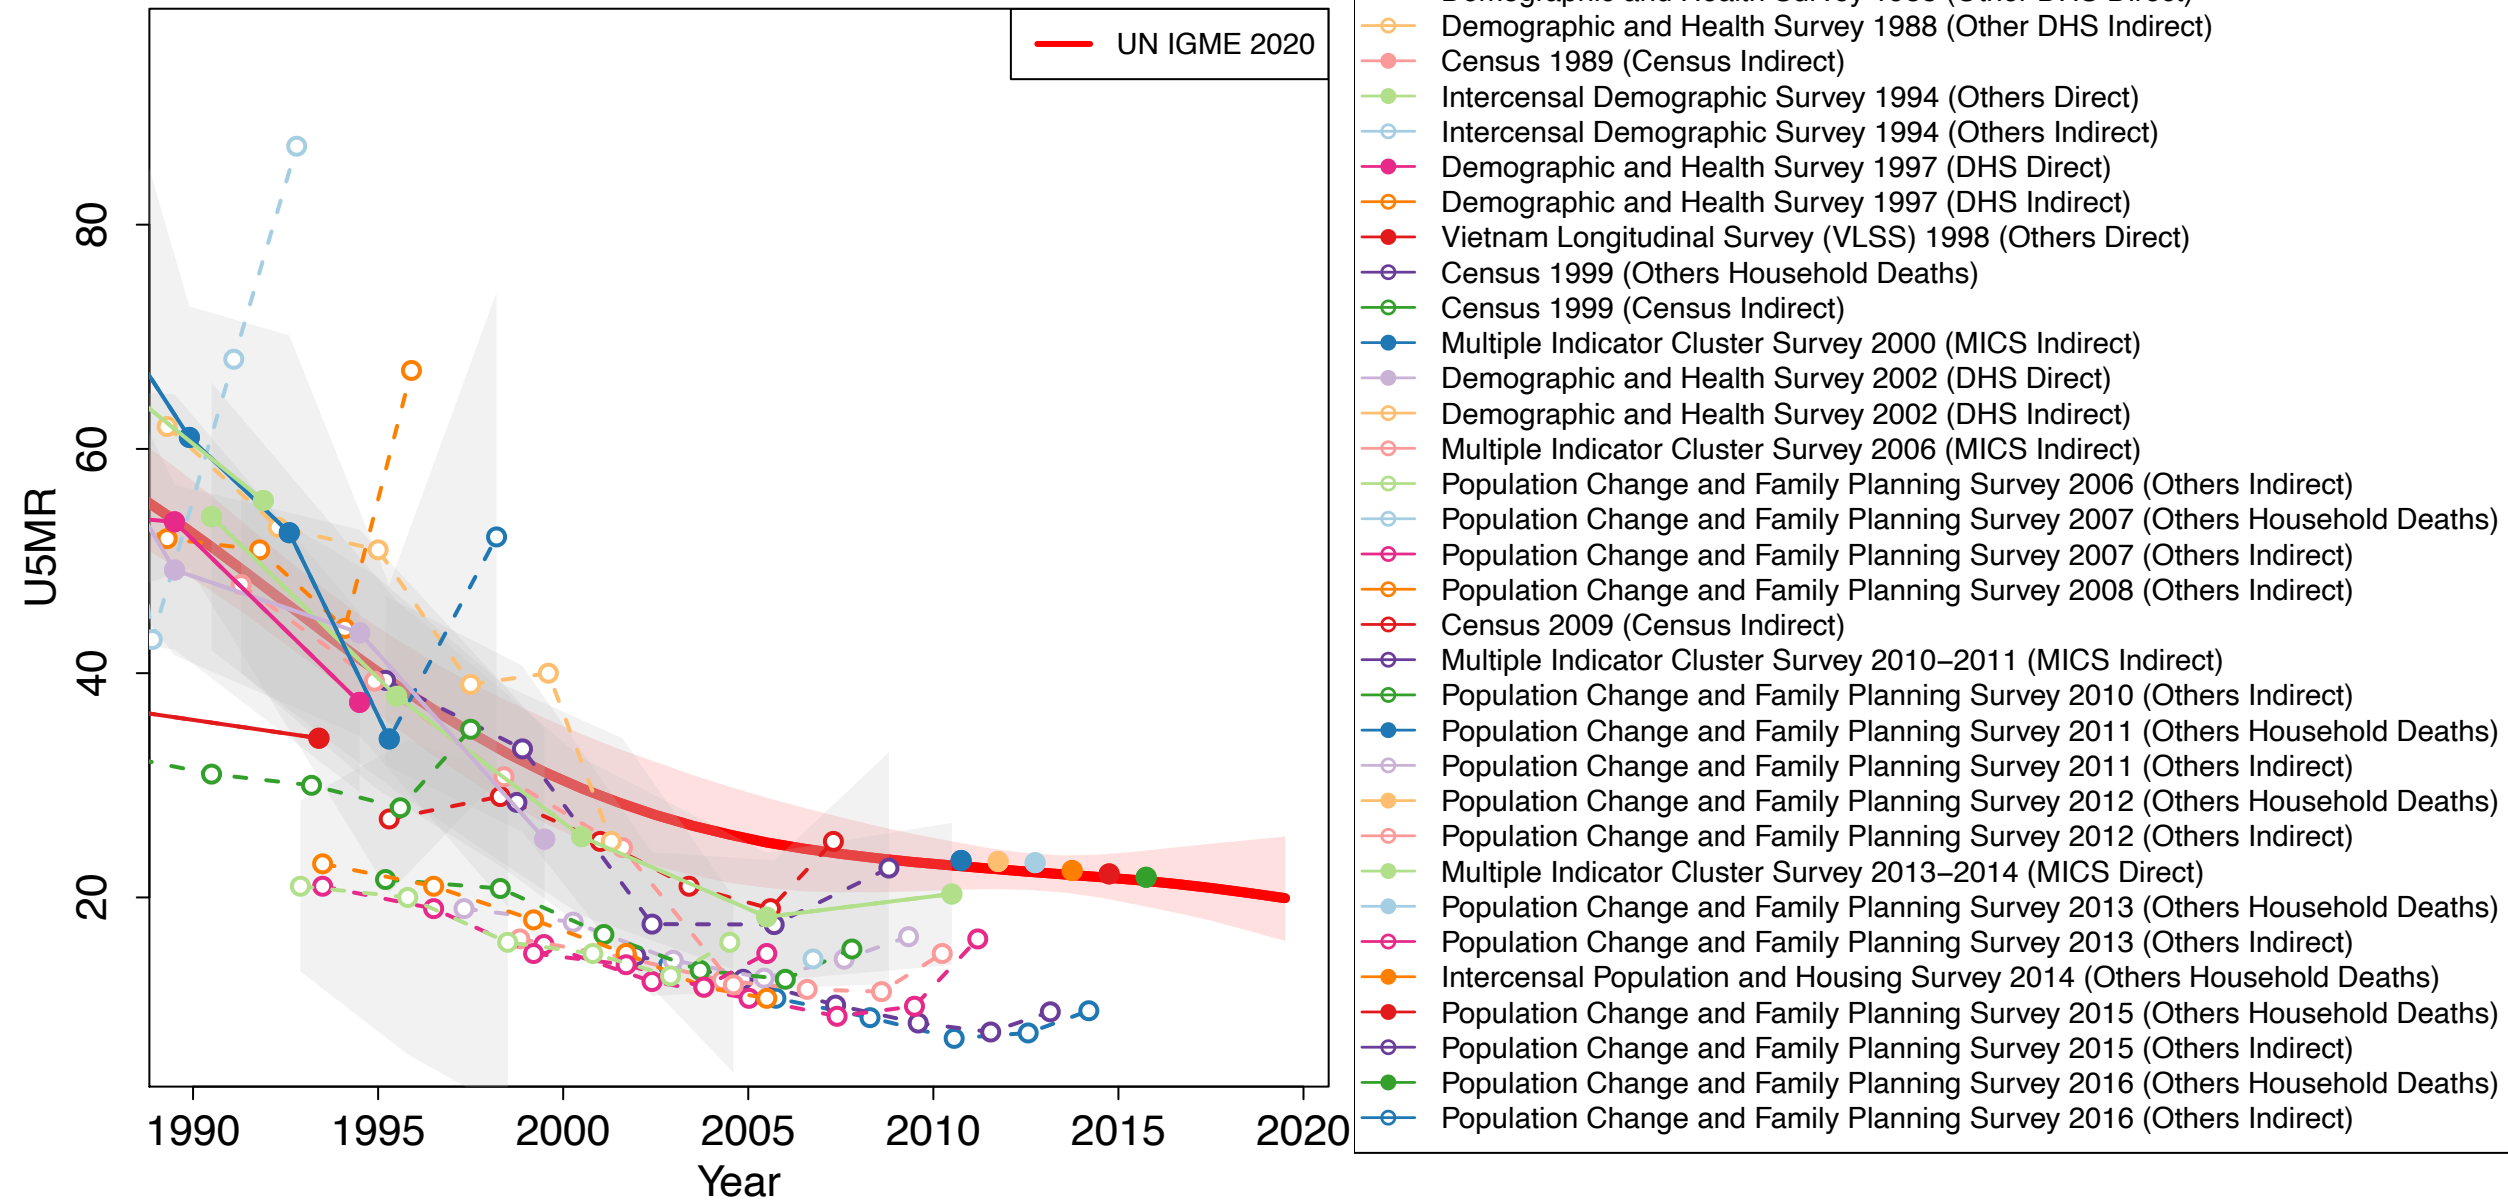

# Yemen

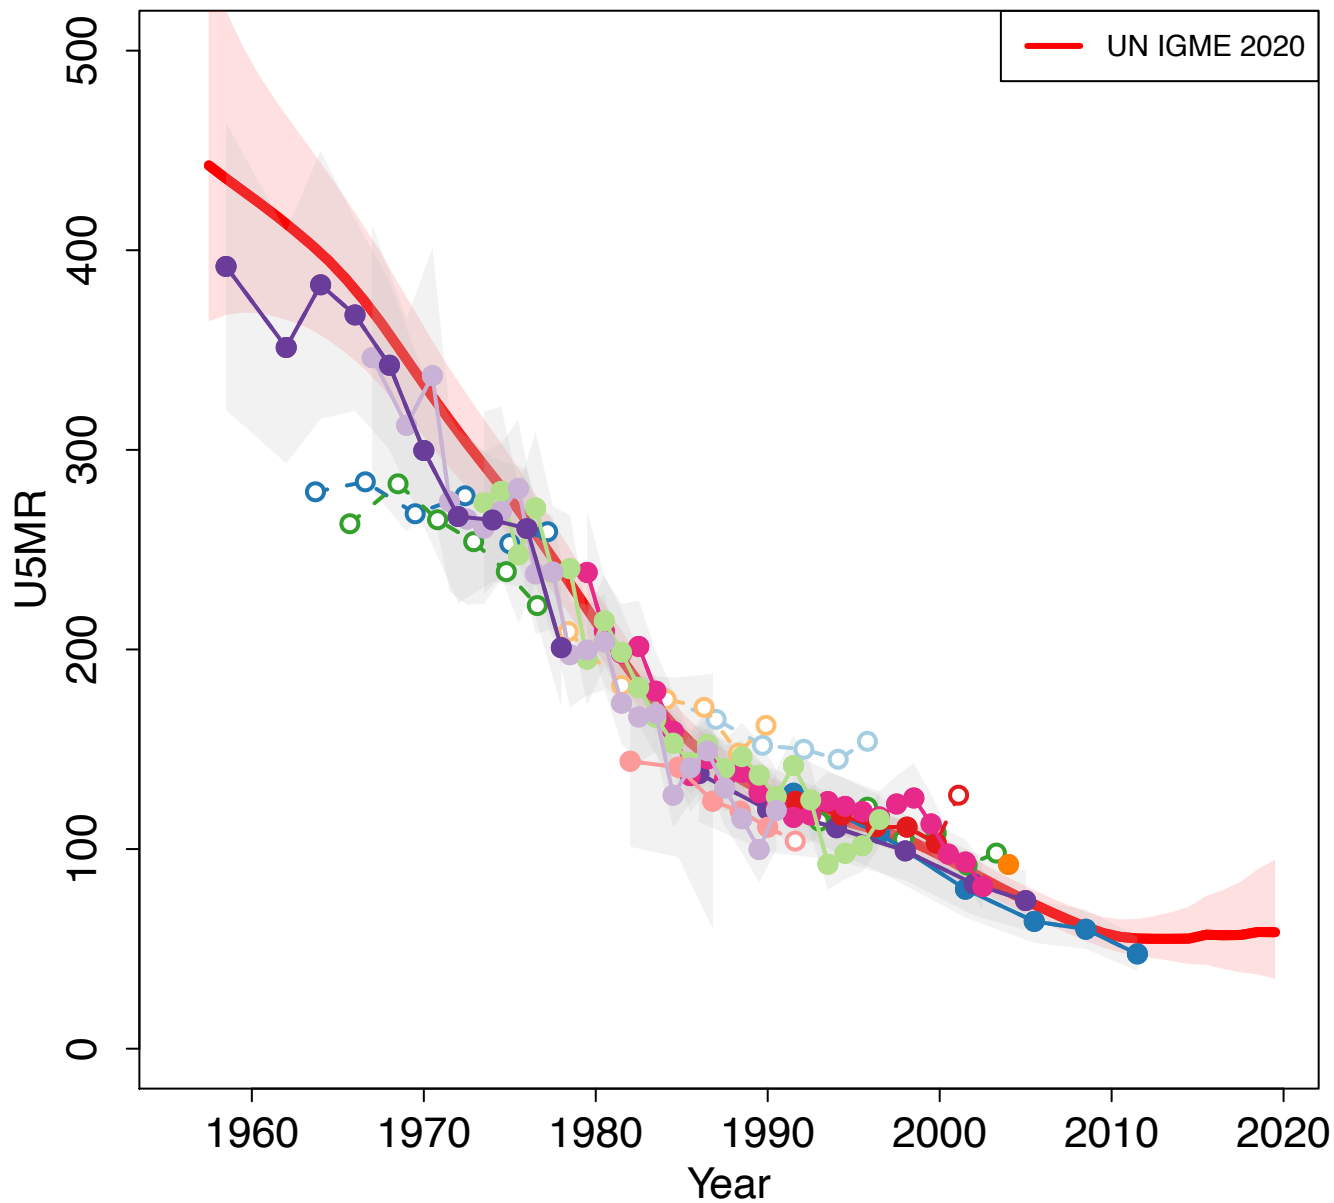

# Zoomed in

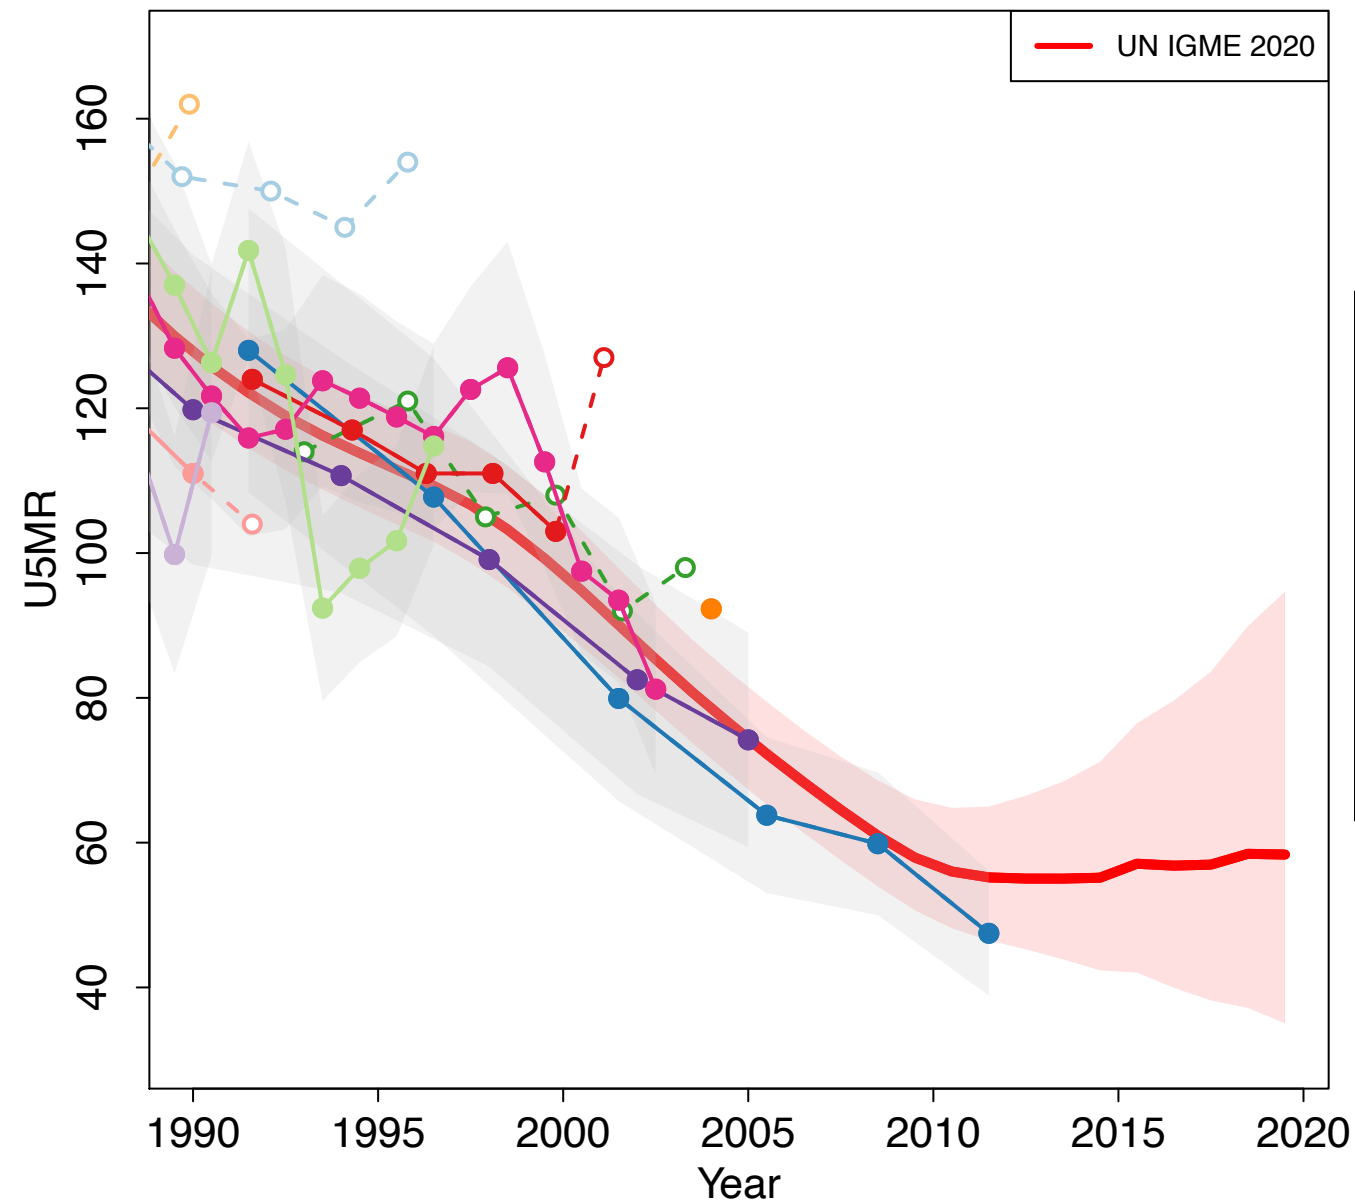

# Zambia

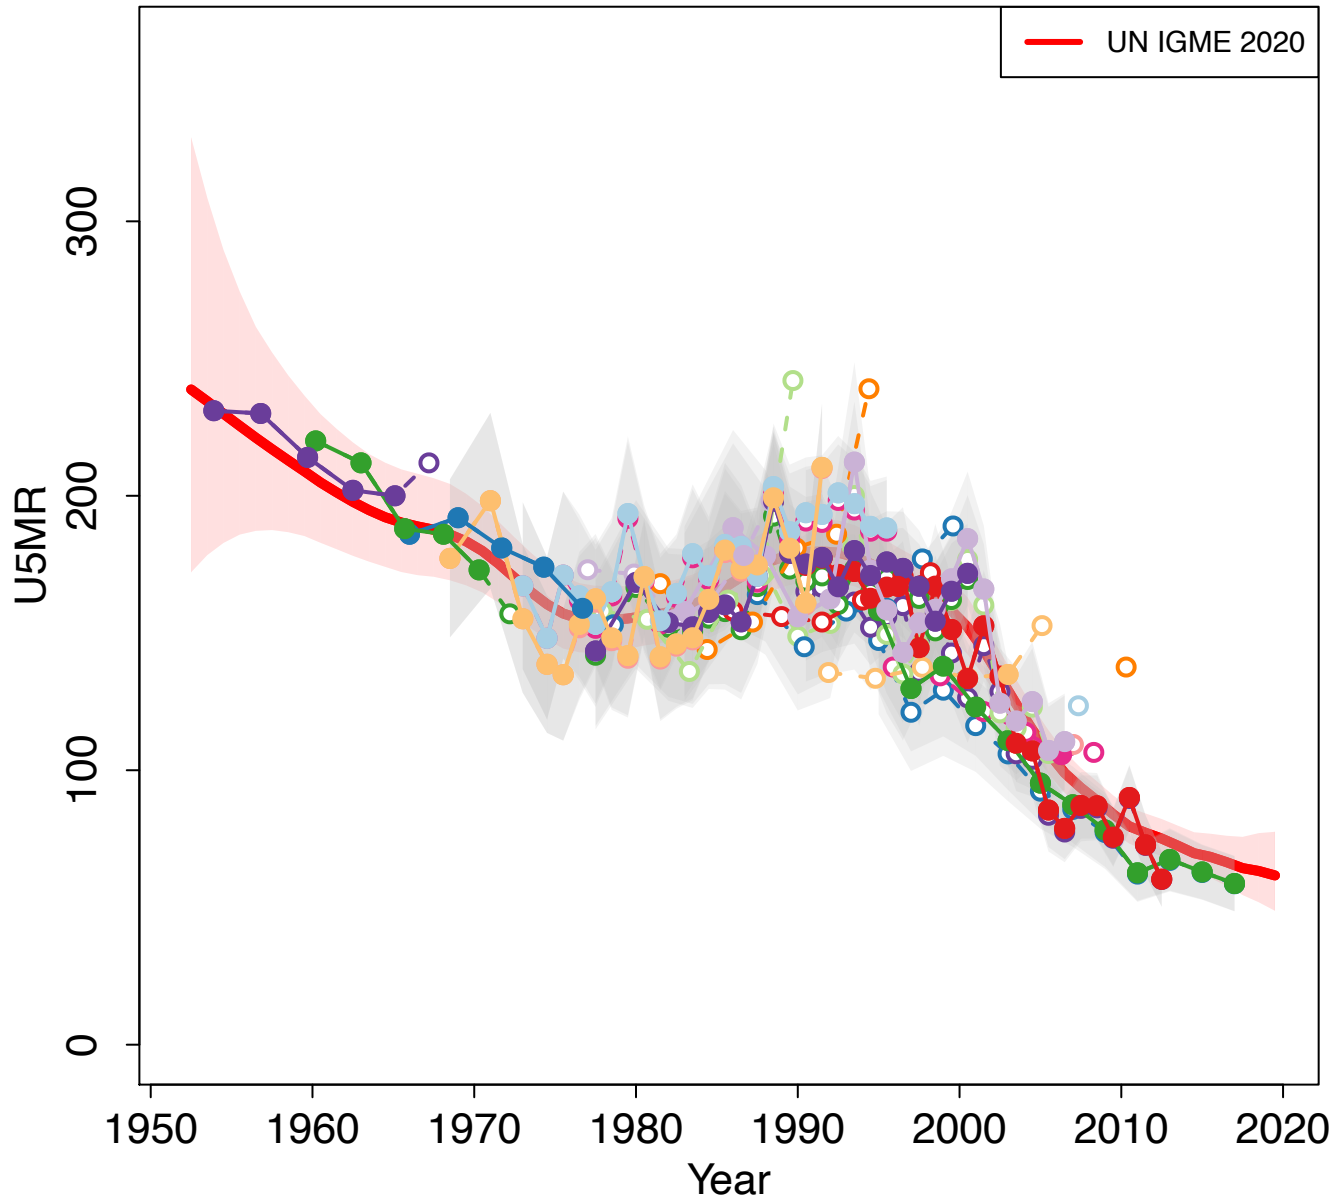

# Zoomed in

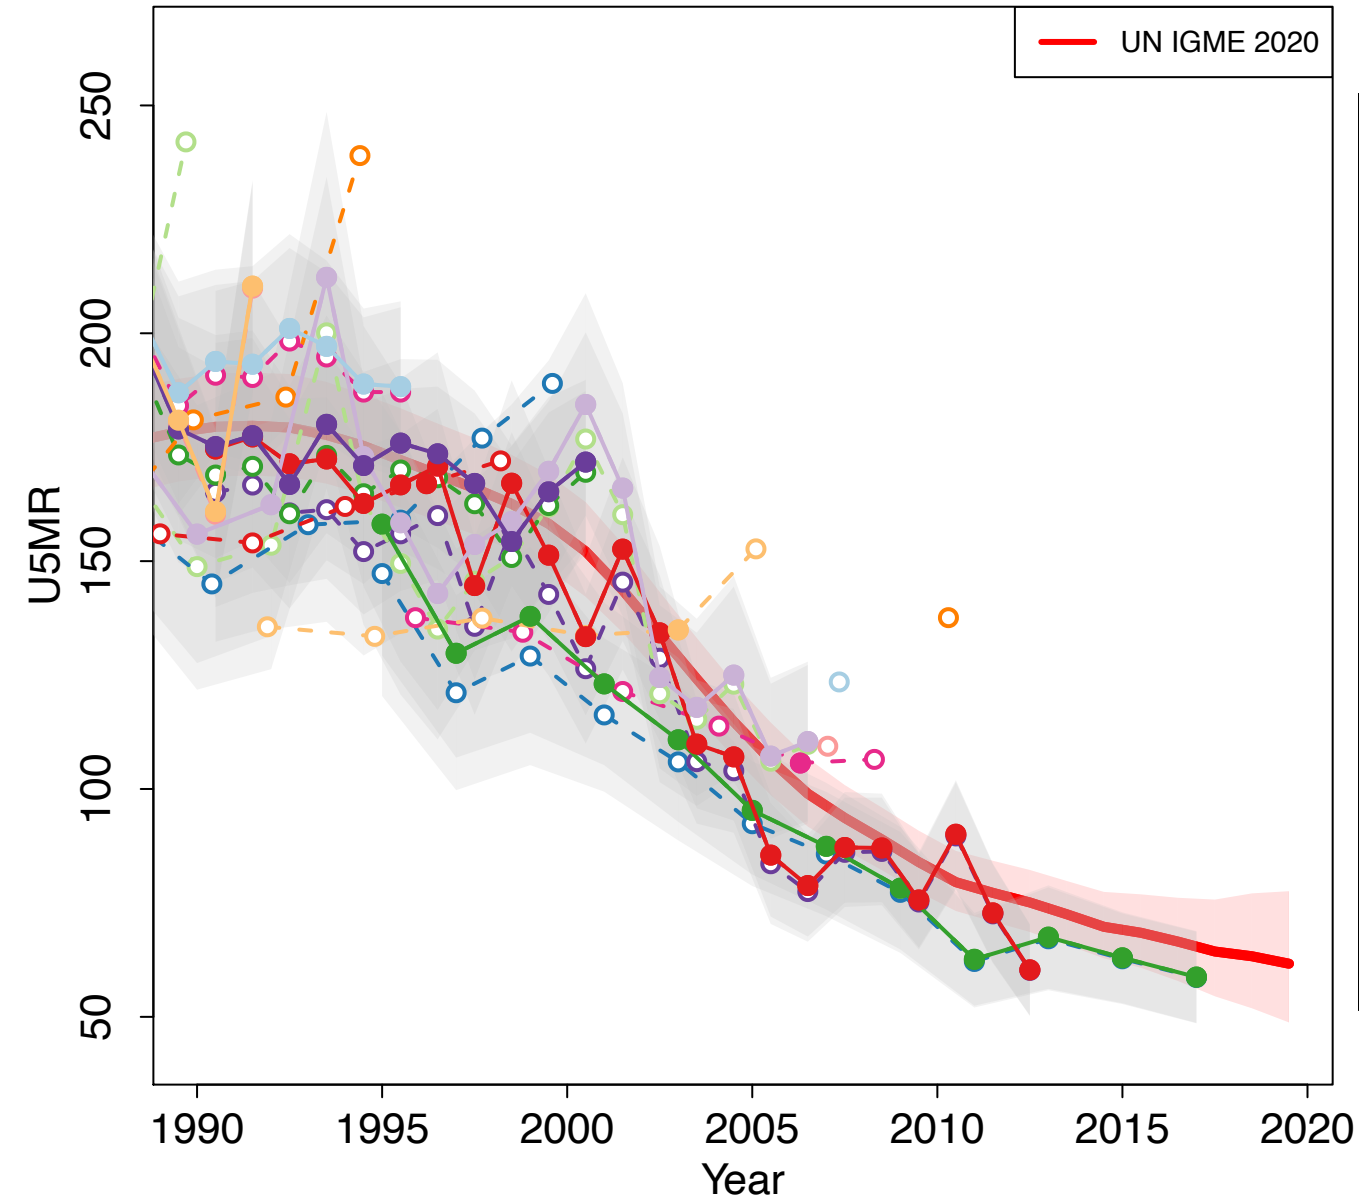

- Census 1969 (Census Indirect)
- Sample Census of Population 1974 (Census Indirect)
- Census 1980 (Census Indirect)
- Census 1990 (Census Indirect)
- Demographic and Health Survey (MM adjusted) 1992 (DHS Direct)
- Demographic and Health Survey 1992 (DHS Direct)
- Demographic and Health Survey 1992 (DHS Indirect)
- Demographic and Health Survey (MM adjusted) 1996–1997 (DHS Direct)
- Demographic and Health Survey 1996–1997 (DHS Direct)
- Demographic and Health Survey 1996–1997 (DHS Indirect)
- Census 2000 (Census Indirect)
- Demographic and Health Survey (MM adjusted) 2001–2002 (DHS Direct)
- Demographic and Health Survey 2001–2002 (DHS Direct)
- Demographic and Health Survey 2001–2002 (DHS Indirect)
- Demographic and Health Survey (MM adjusted) 2007 (DHS Direct)
- Demographic Sample Survey 2007 (Others Indirect)
- Demographic and Health Survey 2007 (Others Household Deaths)
- Demographic and Health Survey 2007 (DHS Direct)
- Global Fund Evaluation Survey 2008 (Others Household Deaths)
- Census 2010 (Census Indirect)
- Census 2010 (Others Household Deaths)
- Demographic and Health Survey (MM adjusted) 2013–2014 (DHS Direct)
- Demographic and Health Survey 2013–2014 (DHS Direct)
- Demographic and Health Survey (MM adjusted) 2018 (DHS Direct)
- Demographic and Health Survey 2018 (DHS Direct)

# Zimbabwe

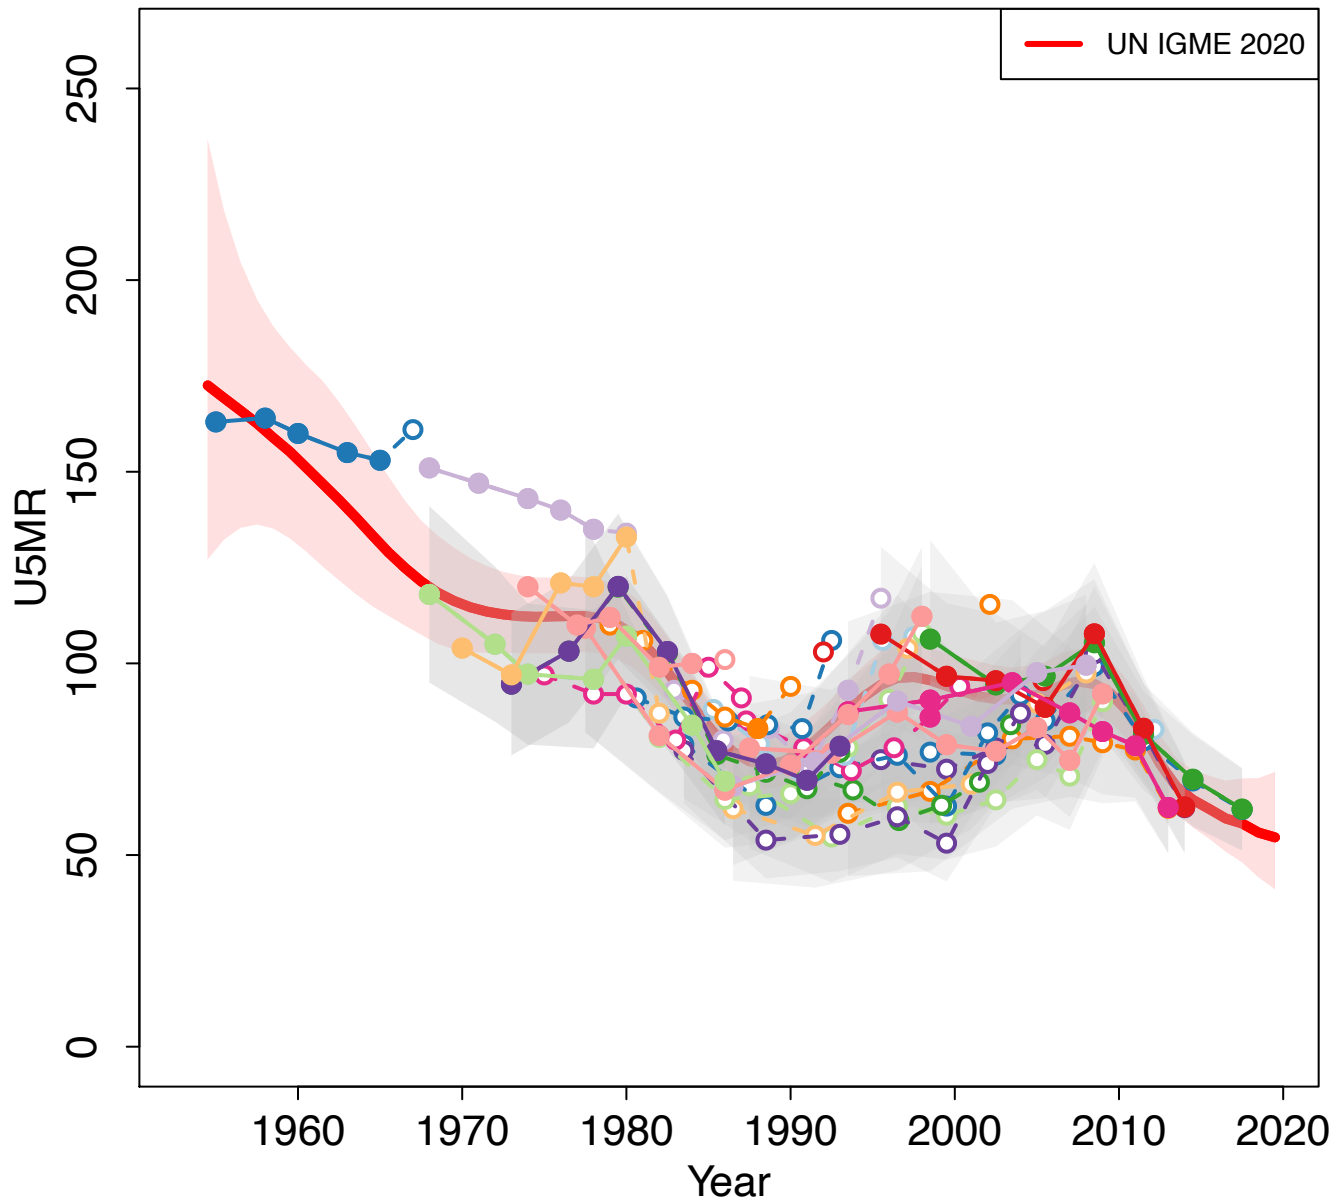

# Zoomed in

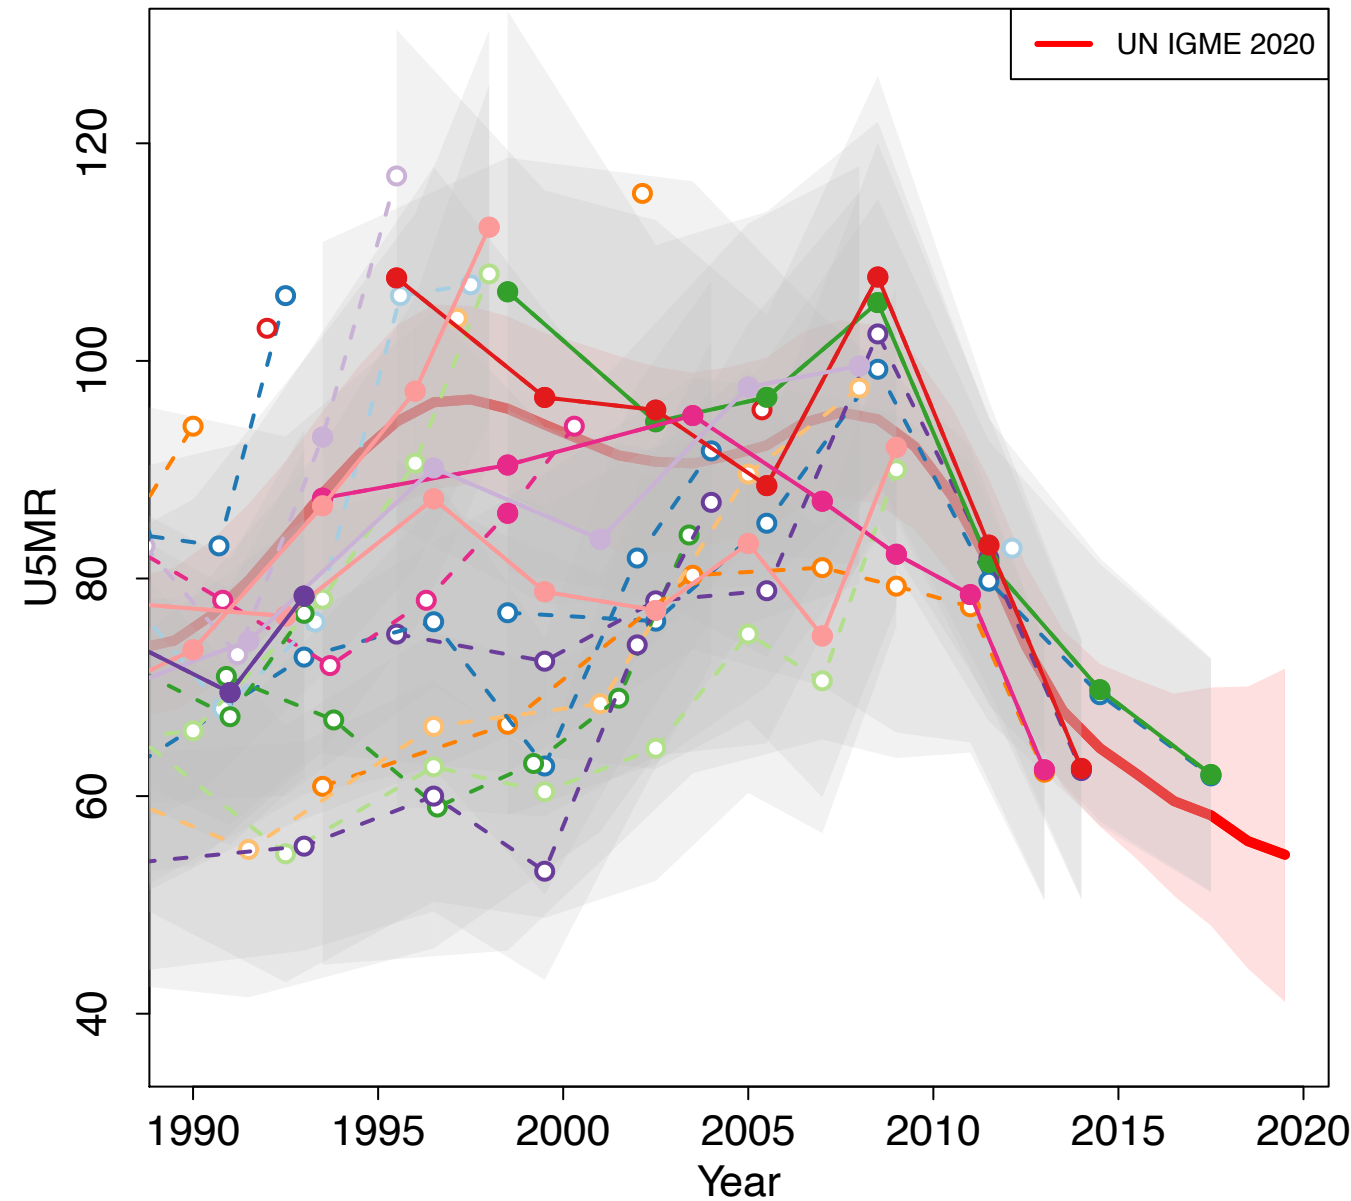

- Census 1969 (Census Indirect)
- Census 1982 (Census Indirect)
- Reproductive Health Survey 1984 (Others Indirect)
- Inter-censal Demographic Survey 1987 (Others Indirect)
- Demographic and Health Survey (MM adjusted) 1988–1989 (DHS Direct)
- Demographic and Health Survey 1988–1989 (DHS Direct)
- Demographic and Health Survey 1988–1989 (DHS Indirect)
- Census 1992 (Census Indirect)
- Census 1992 (Others Household Deaths)
- Demographic and Health Survey (MM adjusted) 1994 (DHS Direct)
- Demographic and Health Survey 1994 (DHS Direct)
- Demographic and Health Survey 1994 (DHS Indirect)
- Inter-censal Demographic Survey 1997 (Others Indirect)
- Inter-censal Demographic Survey 1997 (Others Household Deaths)
- Demographic and Health Survey (MM adjusted) 1999 (DHS Direct)
- Demographic and Health Survey 1999 (DHS Direct)
- Demographic and Health Survey 1999 (DHS Indirect)
- Census 2002 (Census Indirect)
- Census 2002 (Others Household Deaths)
- Demographic and Health Survey 2005–2006 (Others Household Deaths)
- Demographic and Health Survey 2005–2006 (DHS Direct)
- Demographic and Health Survey 2005–2006 (DHS Indirect)
- Demographic and Health Survey (MM adjusted) 2005–2006 (DHS Direct)
- Multiple Indicator Cluster Survey (MM adjusted) 2009 (MICS Direct)
- Multiple Indicator Cluster Survey 2009 (MICS Direct)
- Demographic and Health Survey (MM adjusted) 2010–2011 (DHS Direct)
- Demographic and Health Survey 2010–2011 (DHS Direct)
- Census 2012 (Others Household Deaths)
- Multiple Indicator Cluster Survey (MM adjusted) 2014 (MICS Direct)
- Multiple Indicator Cluster Survey 2014 (MICS Direct)
- Demographic and Health Survey (MM adjusted) 2015 (DHS Direct)
- Demographic and Health Survey 2015 (DHS Direct)
- Multiple Indicator Cluster Survey (MM adjusted) 2019 (MICS Direct)
- Multiple Indicator Cluster Survey 2019 (MICS Direct)

4.5. Figure A.5 Neonatal mortality estimates with underlying data, by country

# Afghanistan

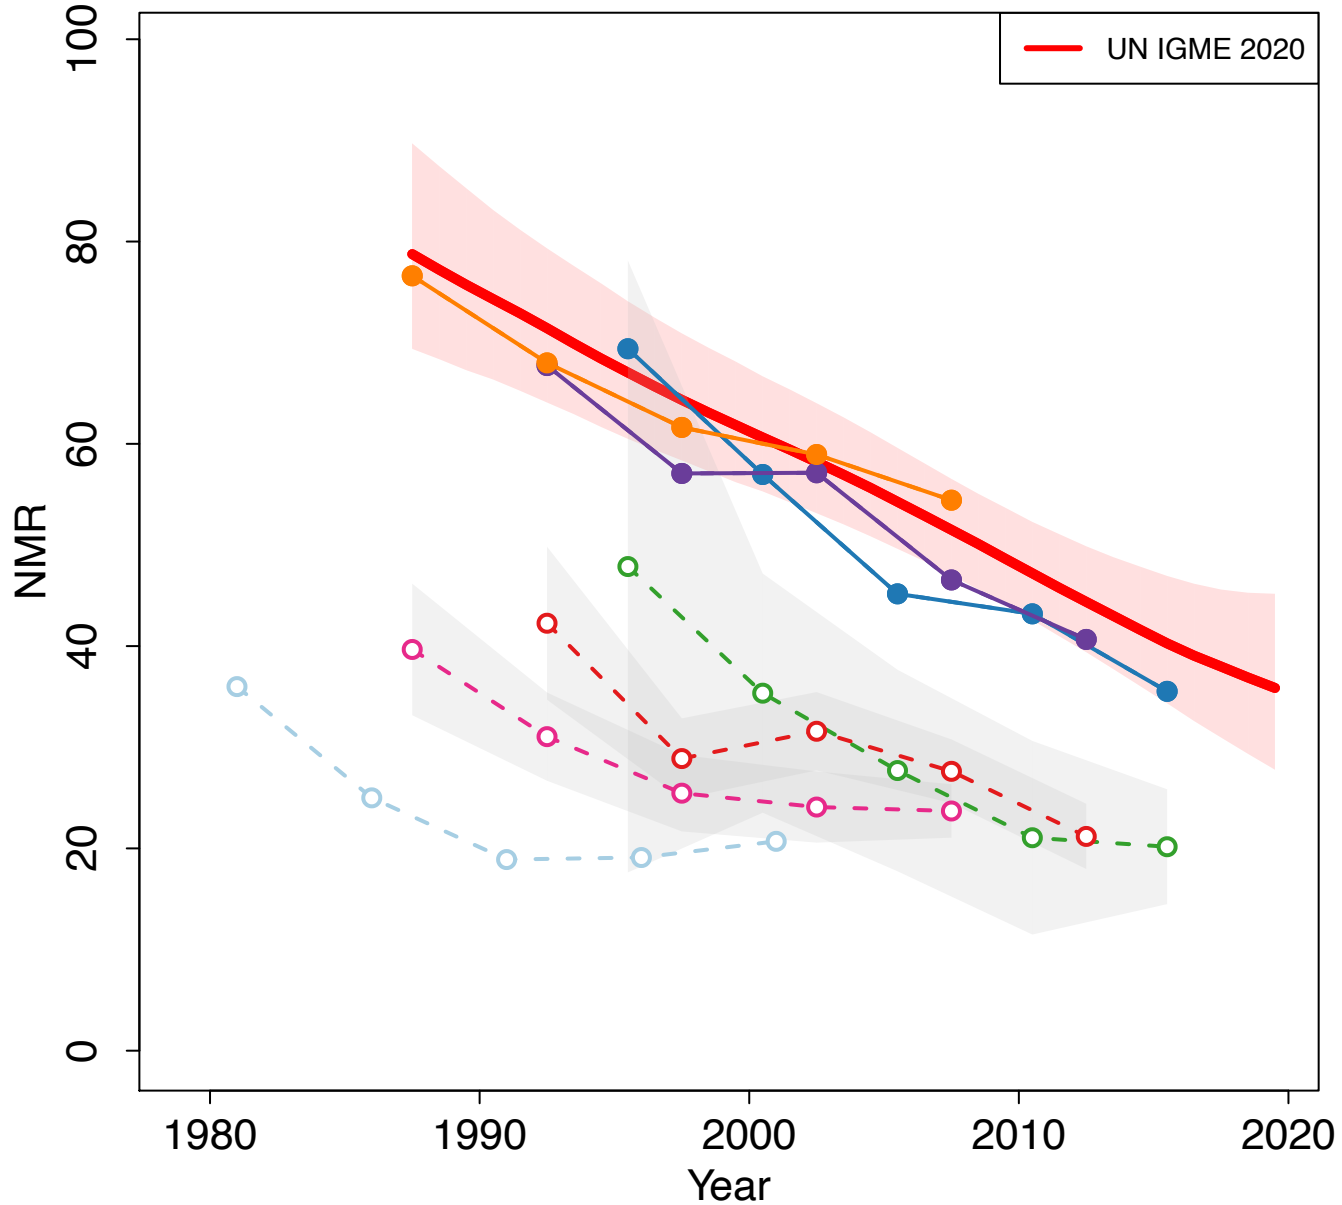

# Zoomed in

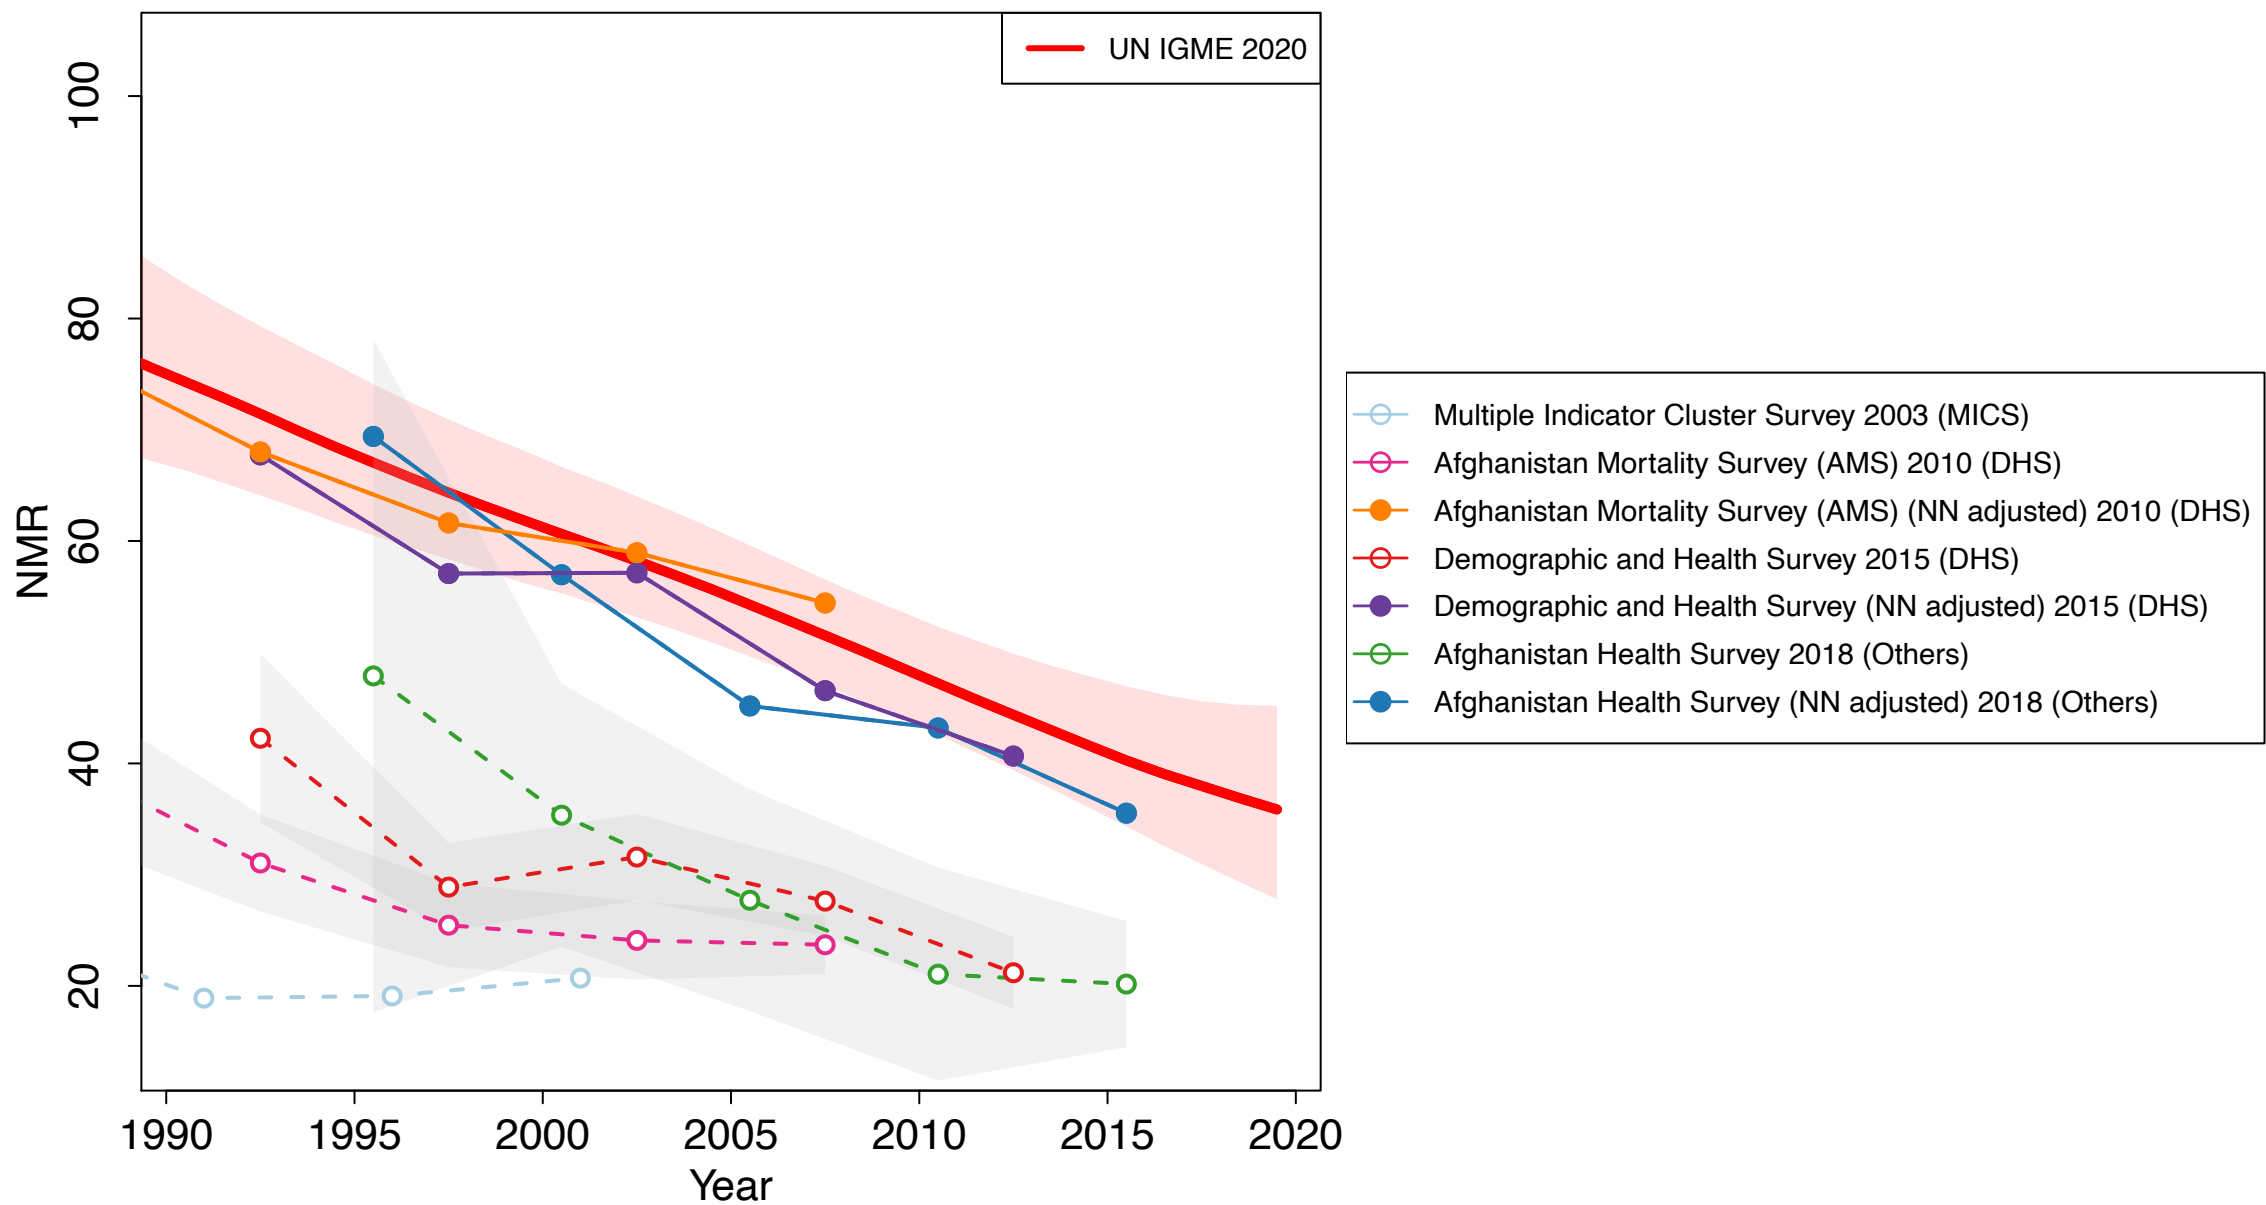



# Albania

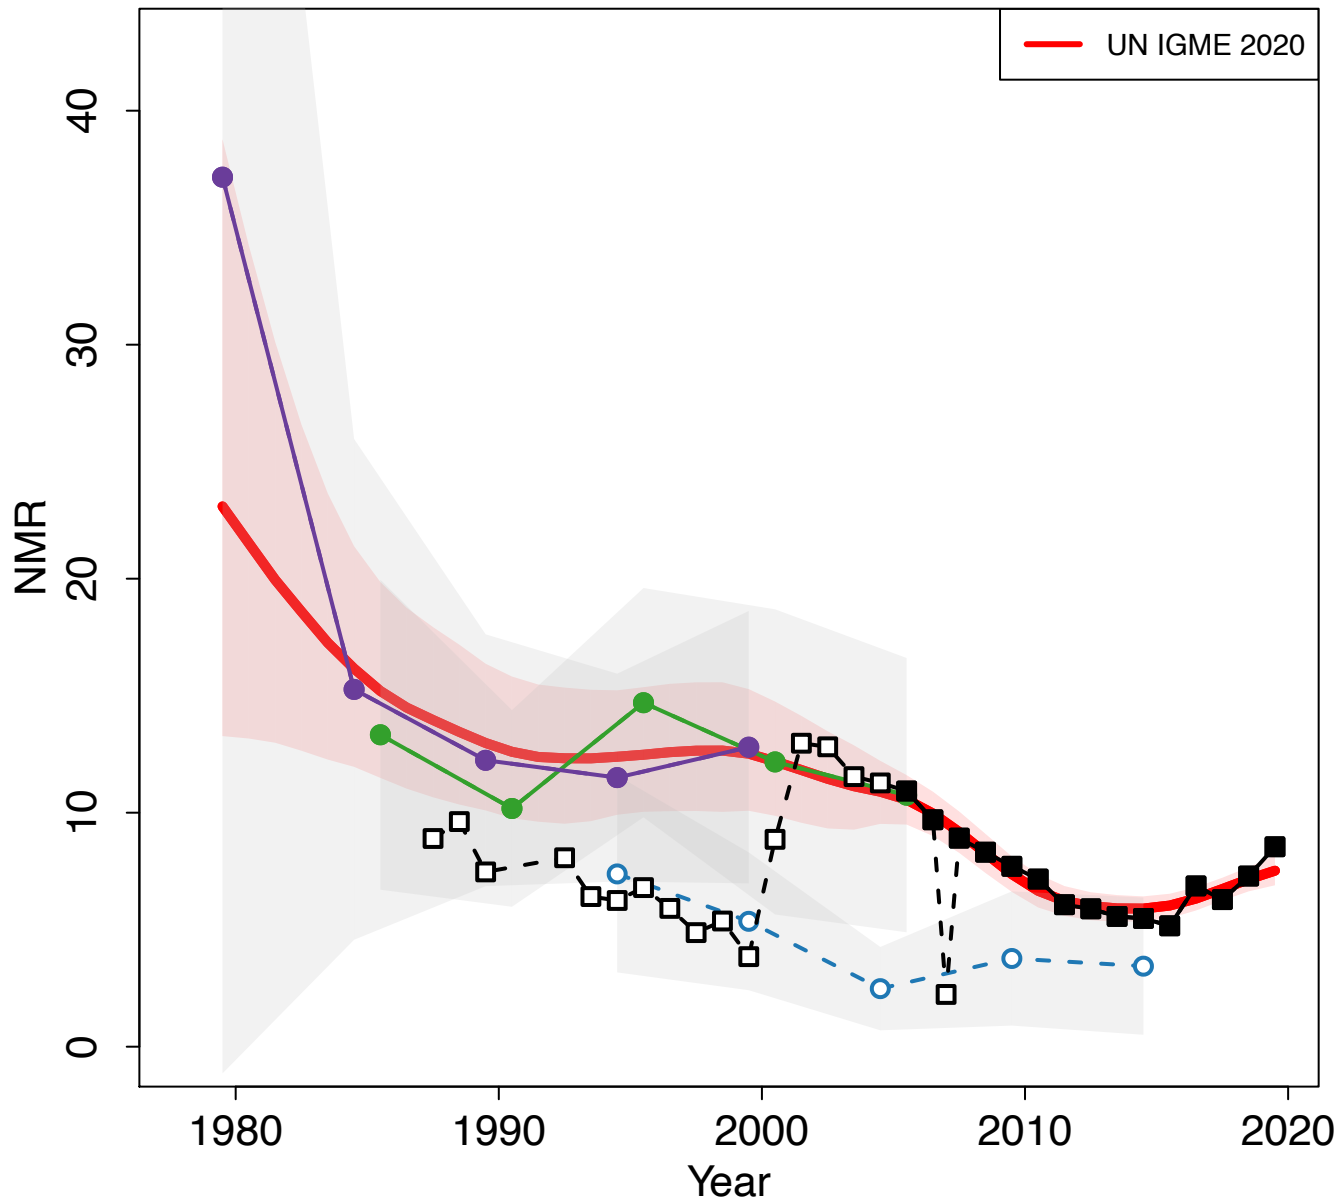

# Zoomed in

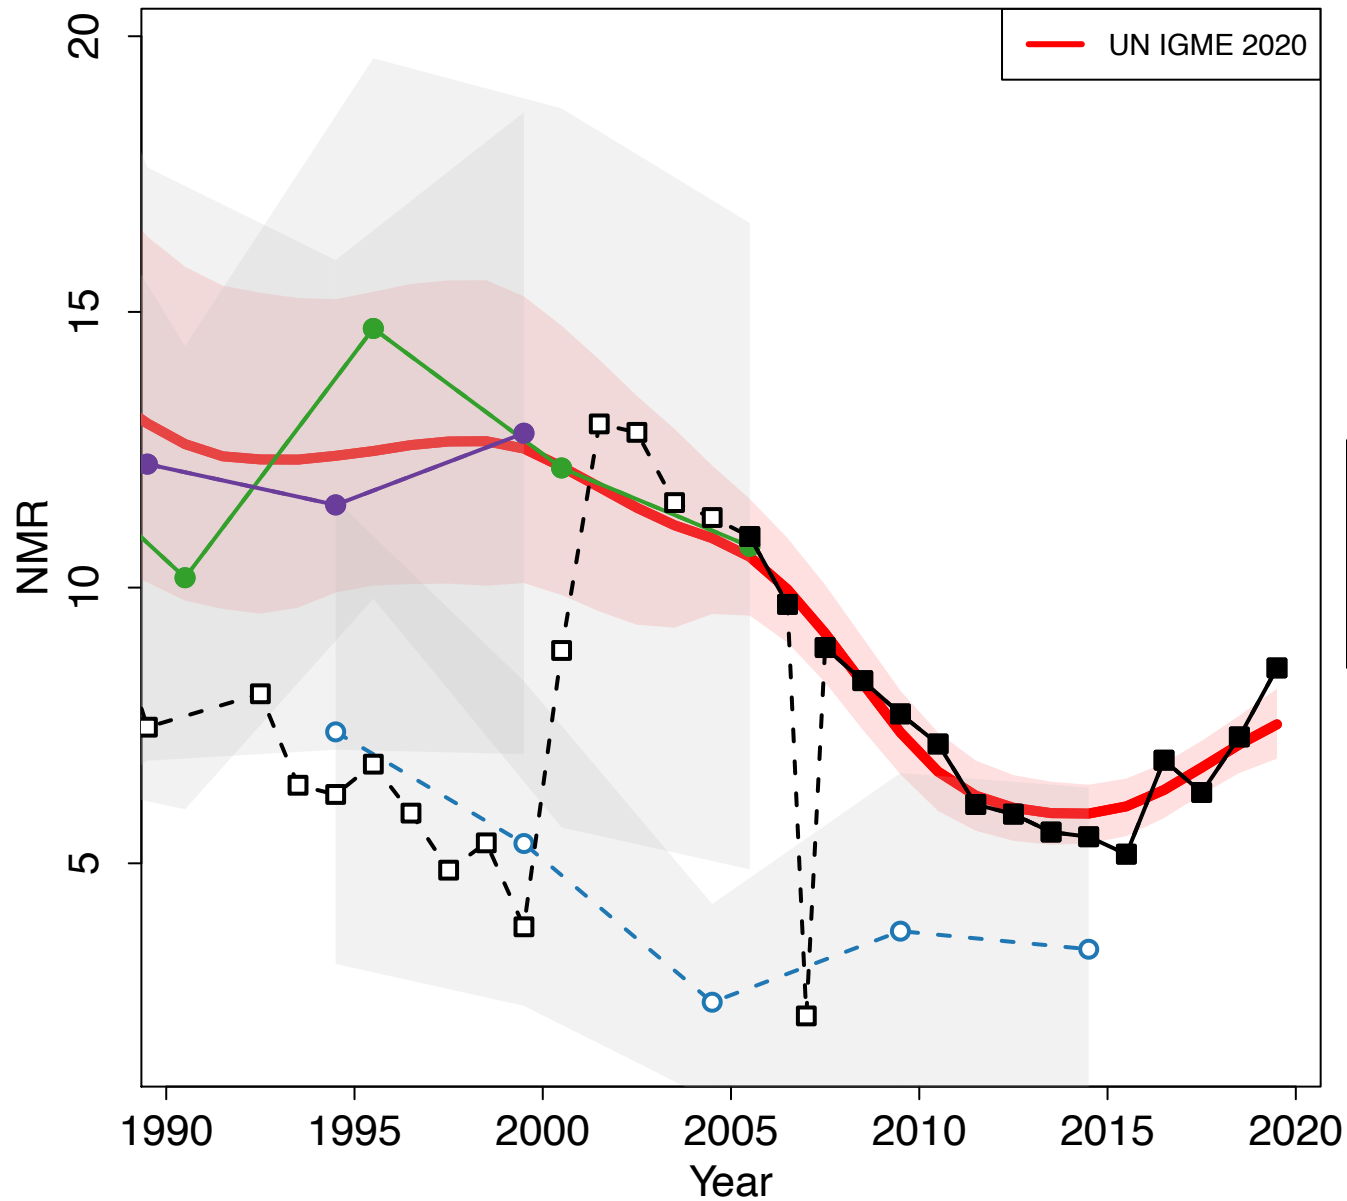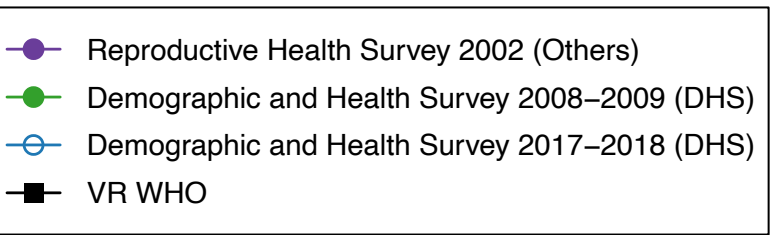

# Algeria

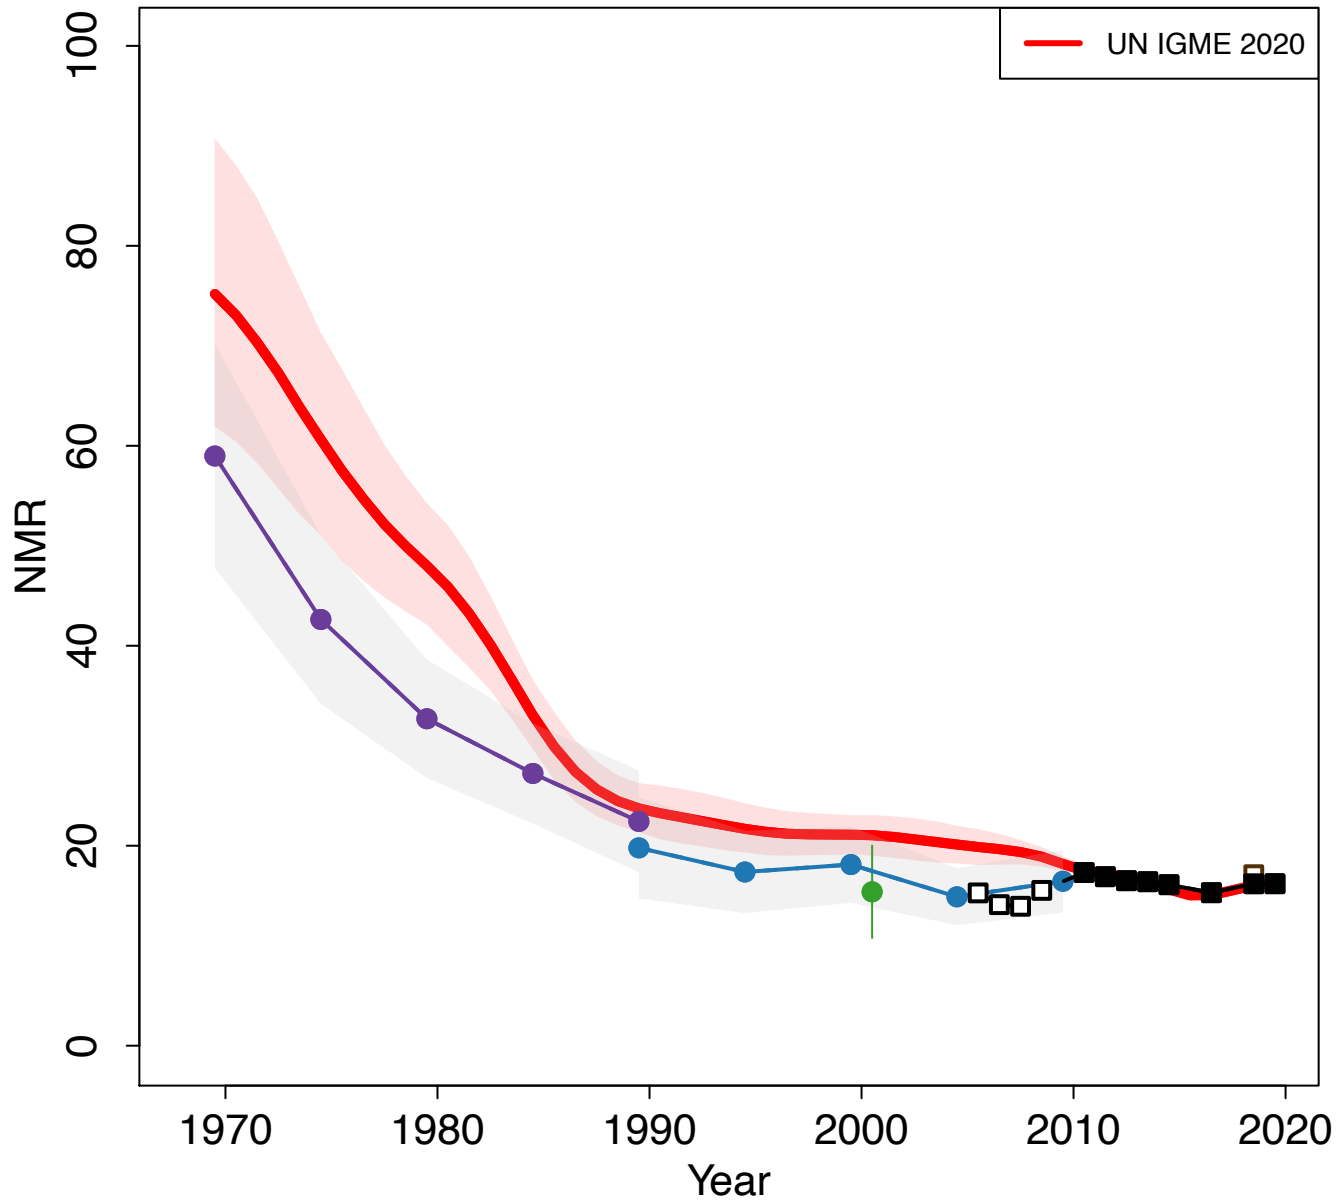

# Zoomed in

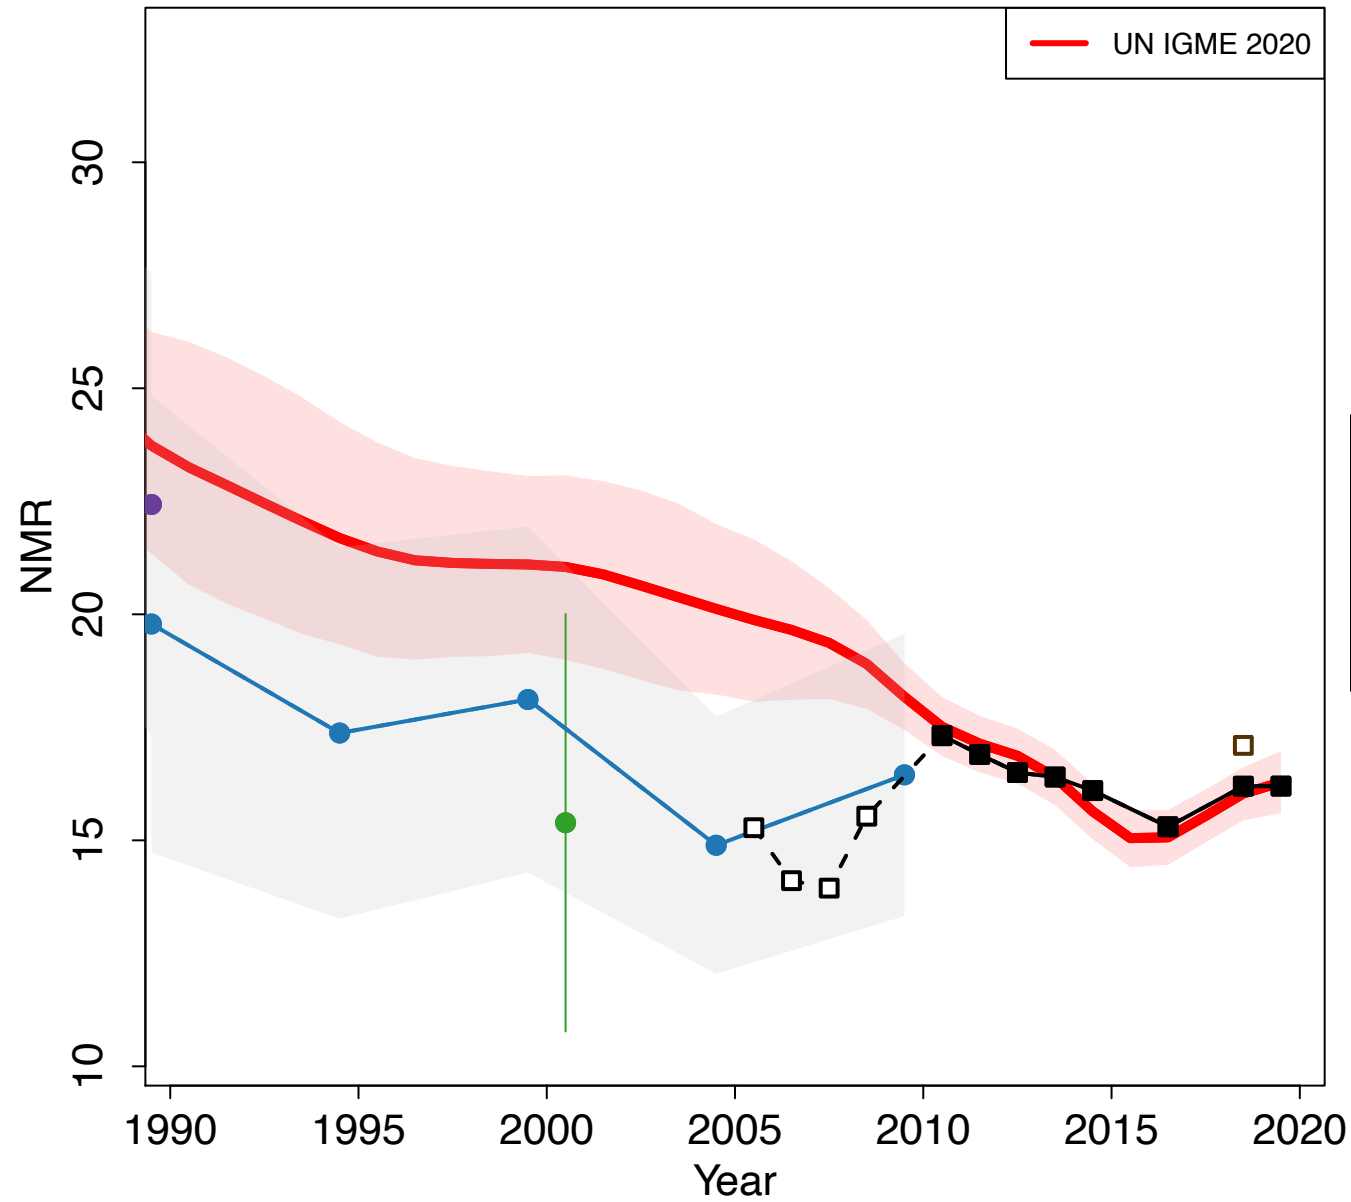



# Andorra

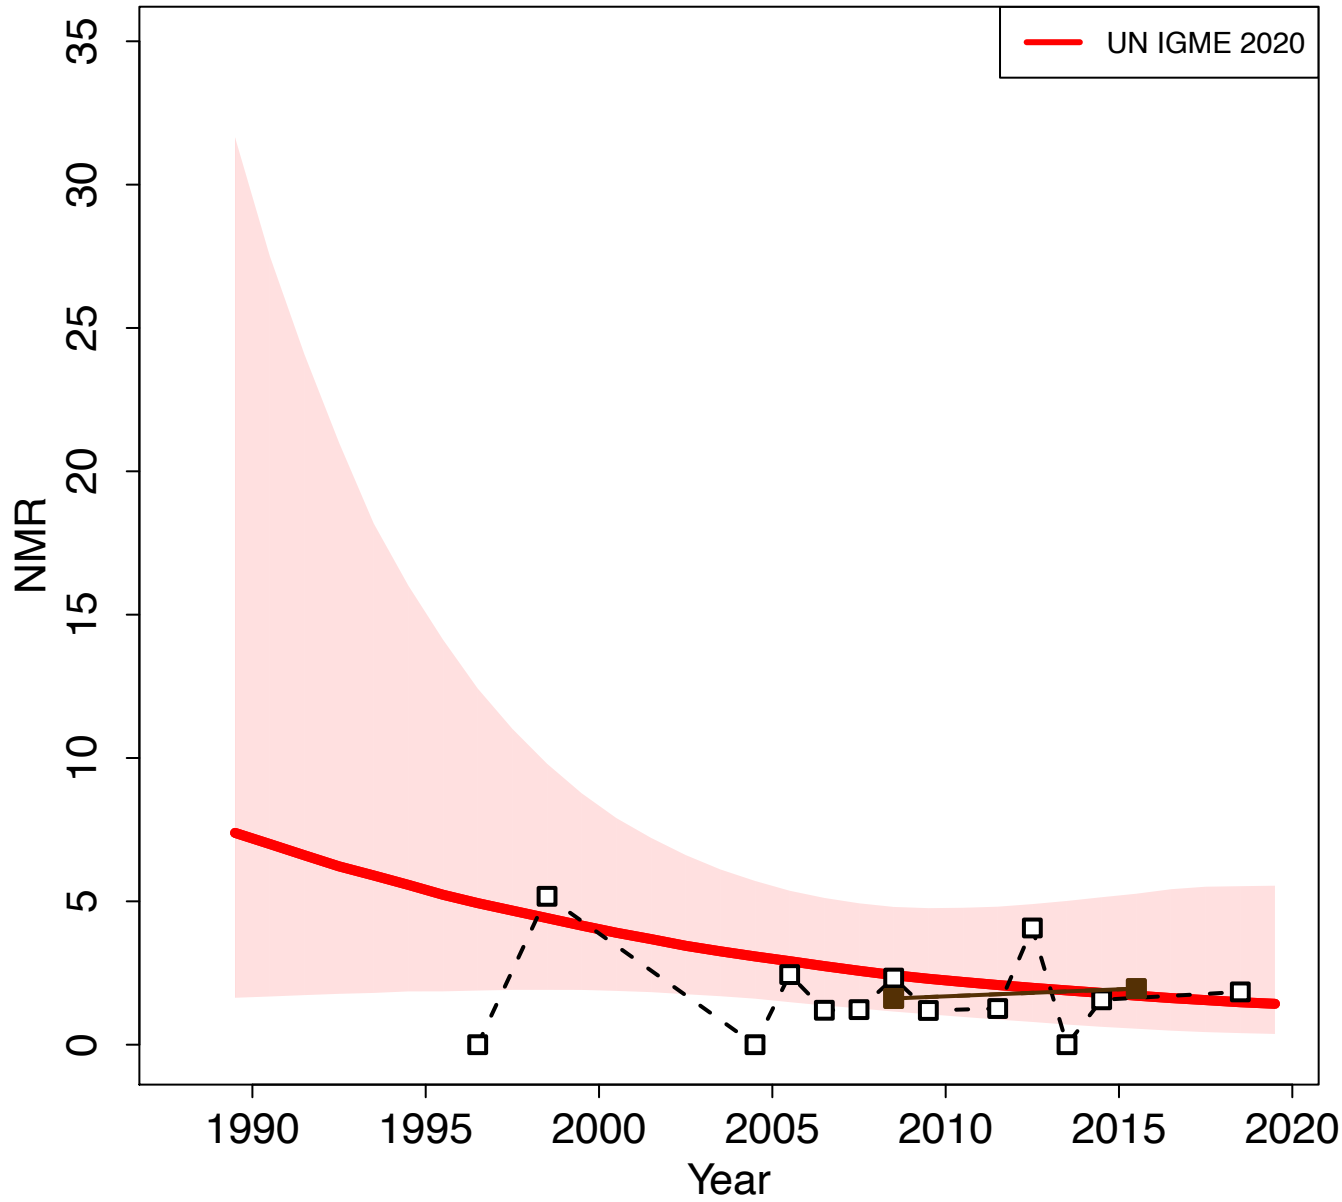

# Zoomed in

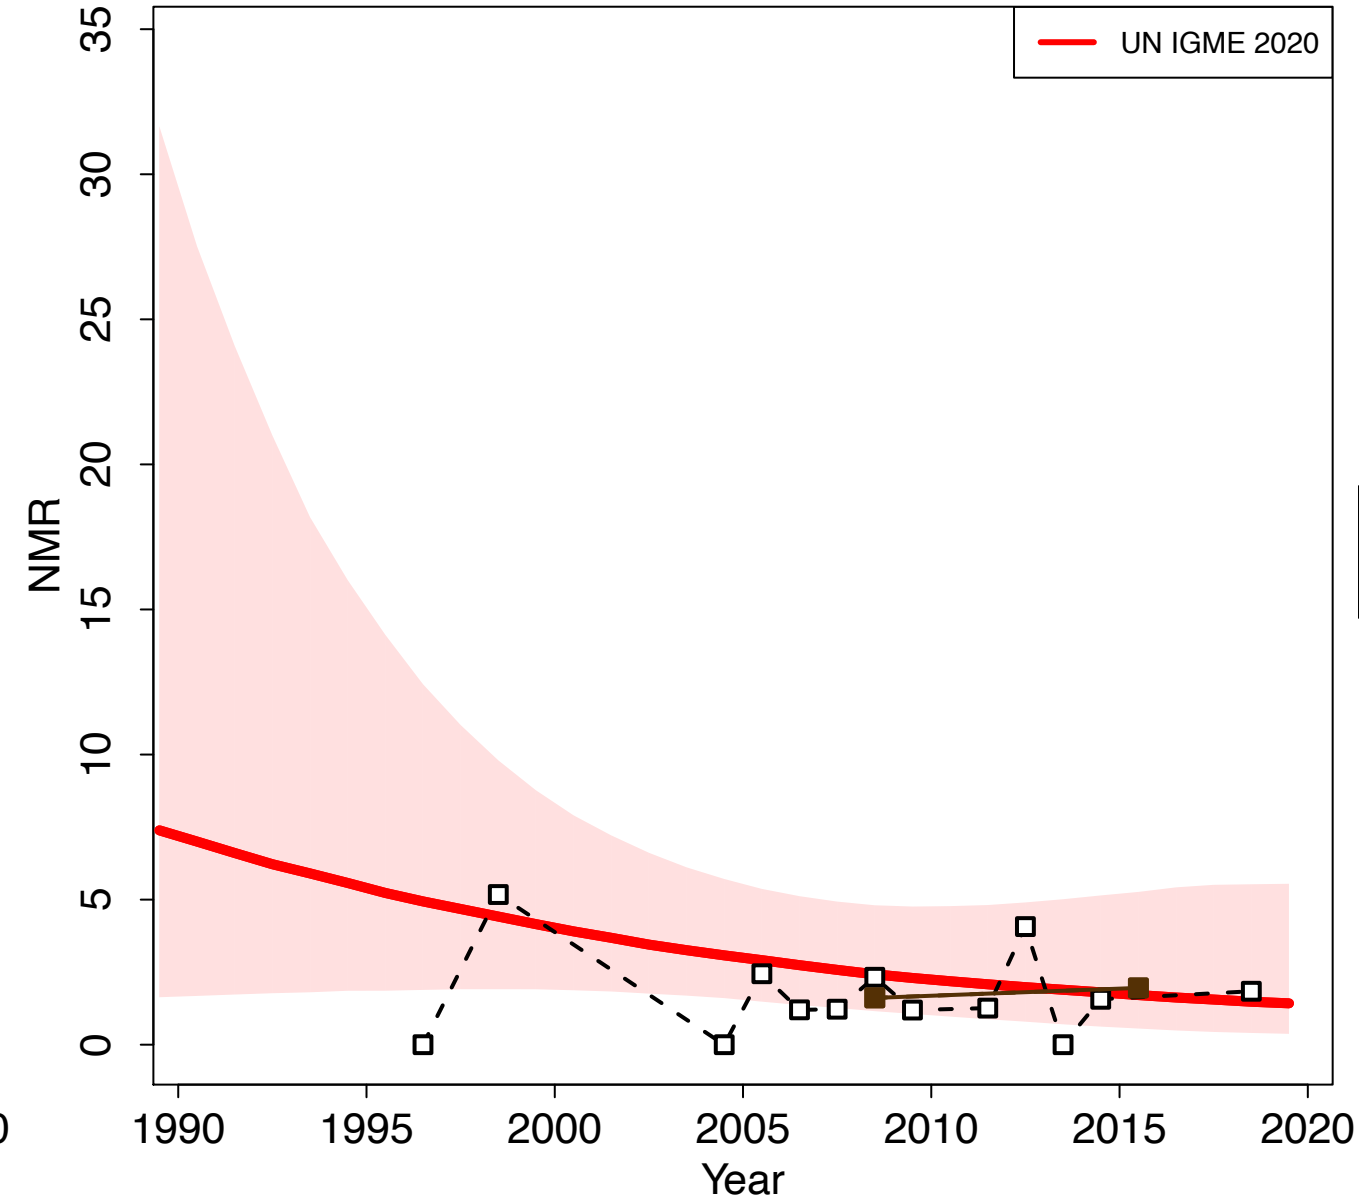

# Angola

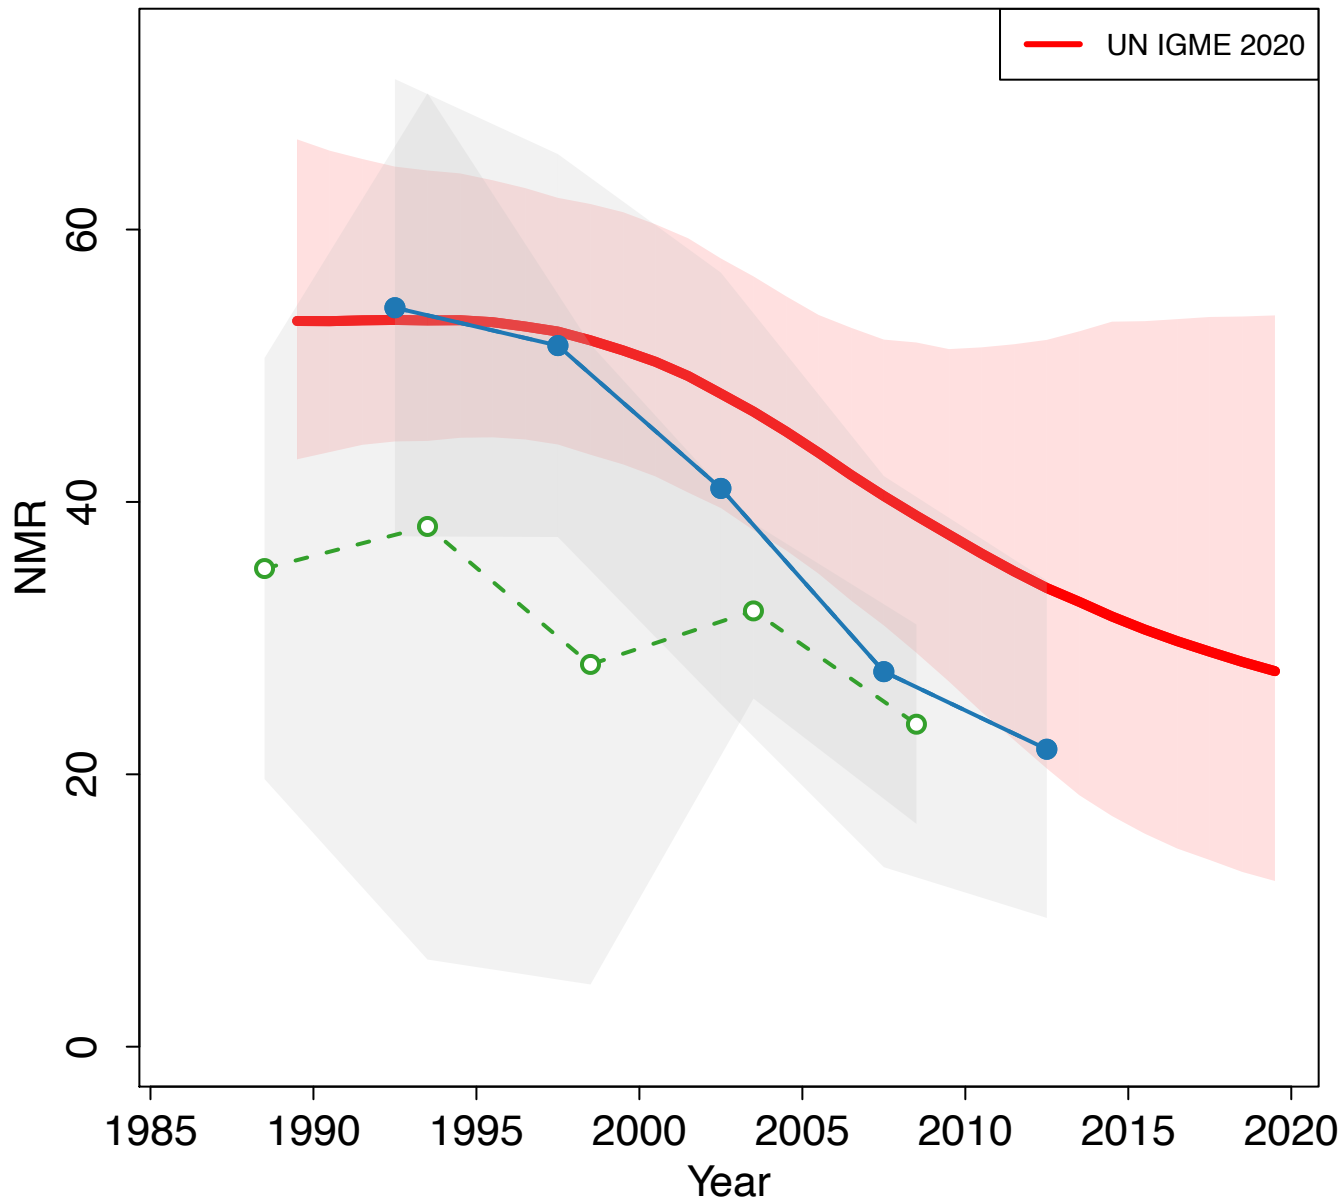

# Zoomed in

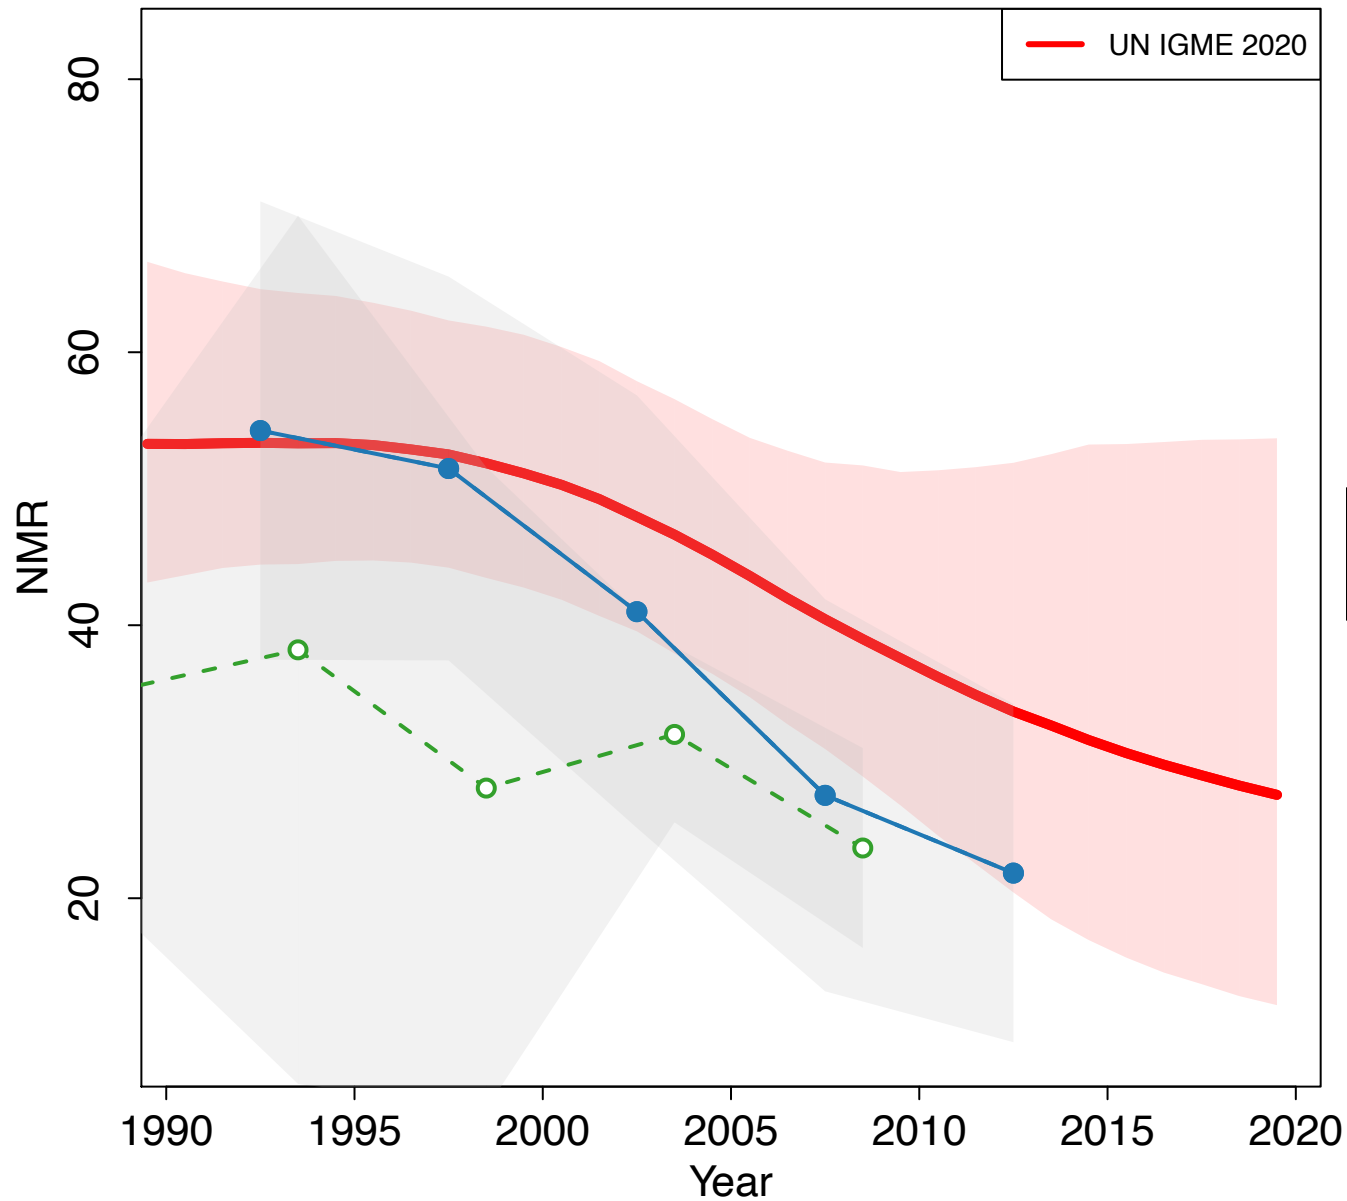

# Antigua and Barbuda

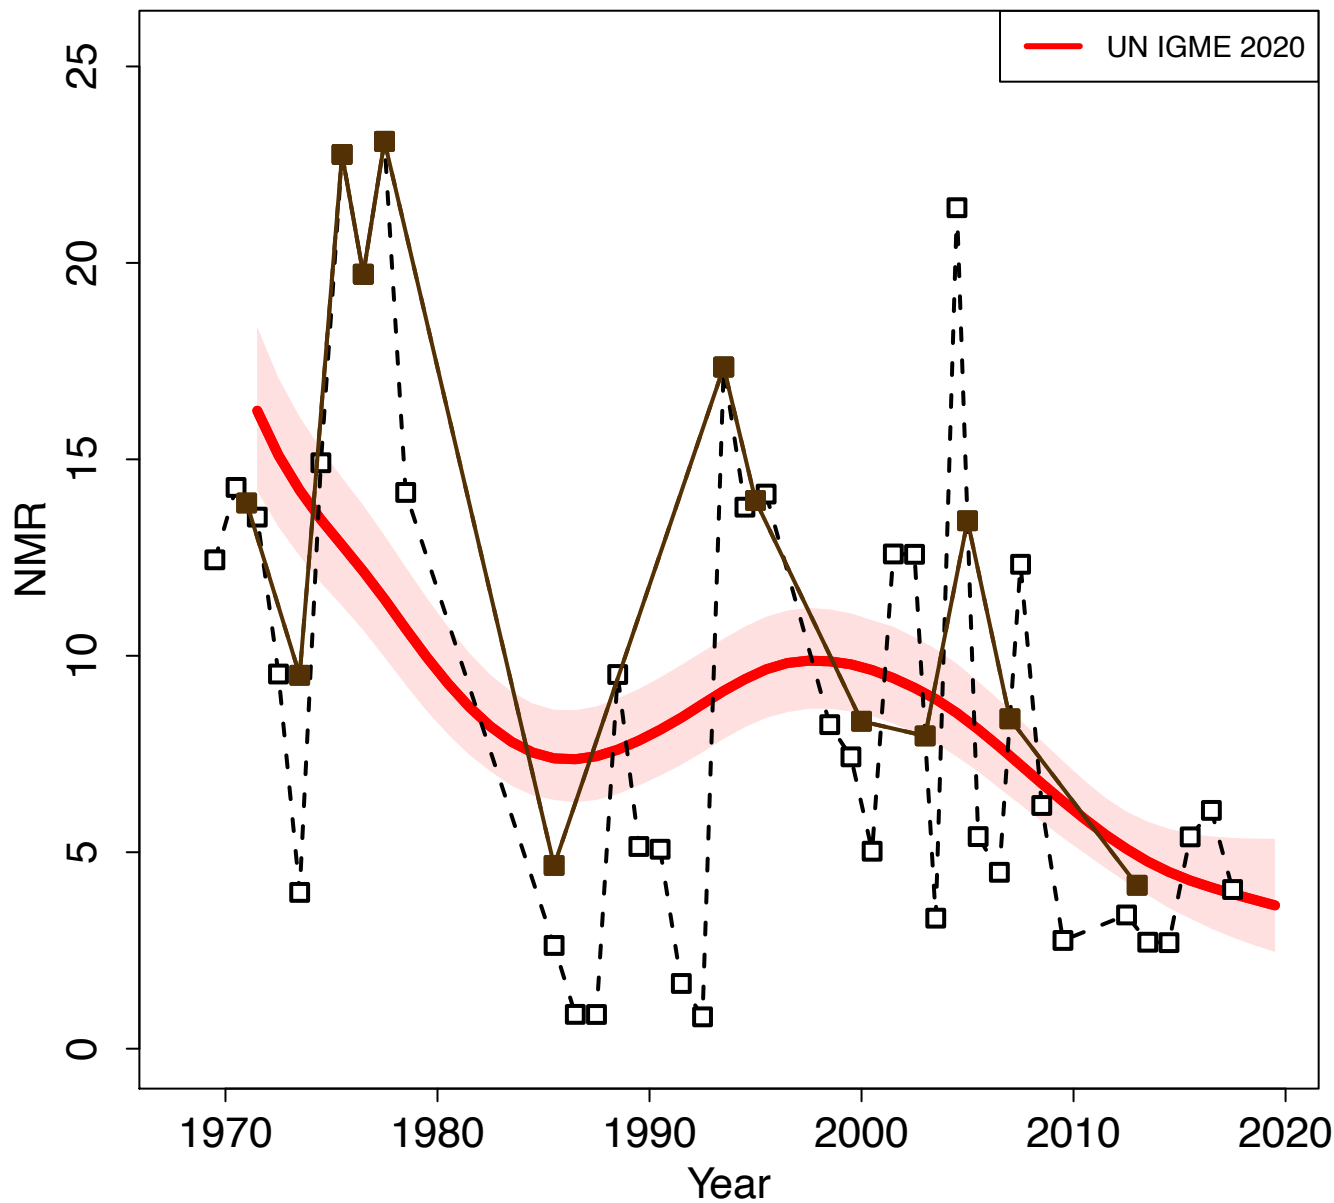

# Zoomed in

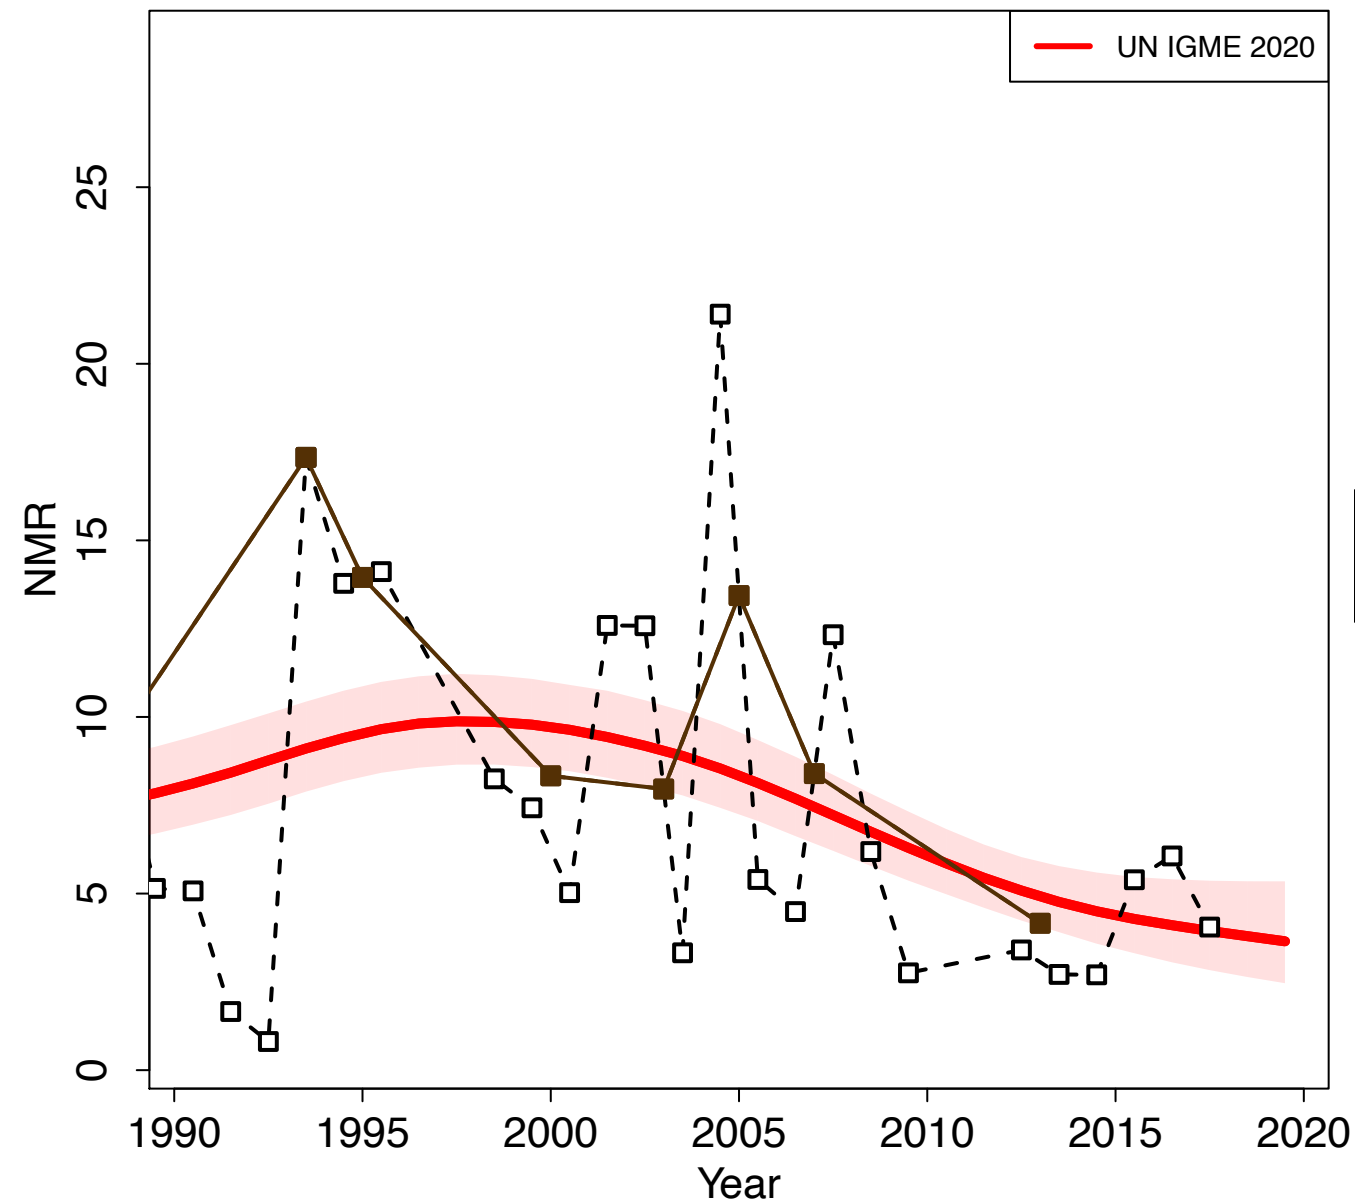

# Argentina

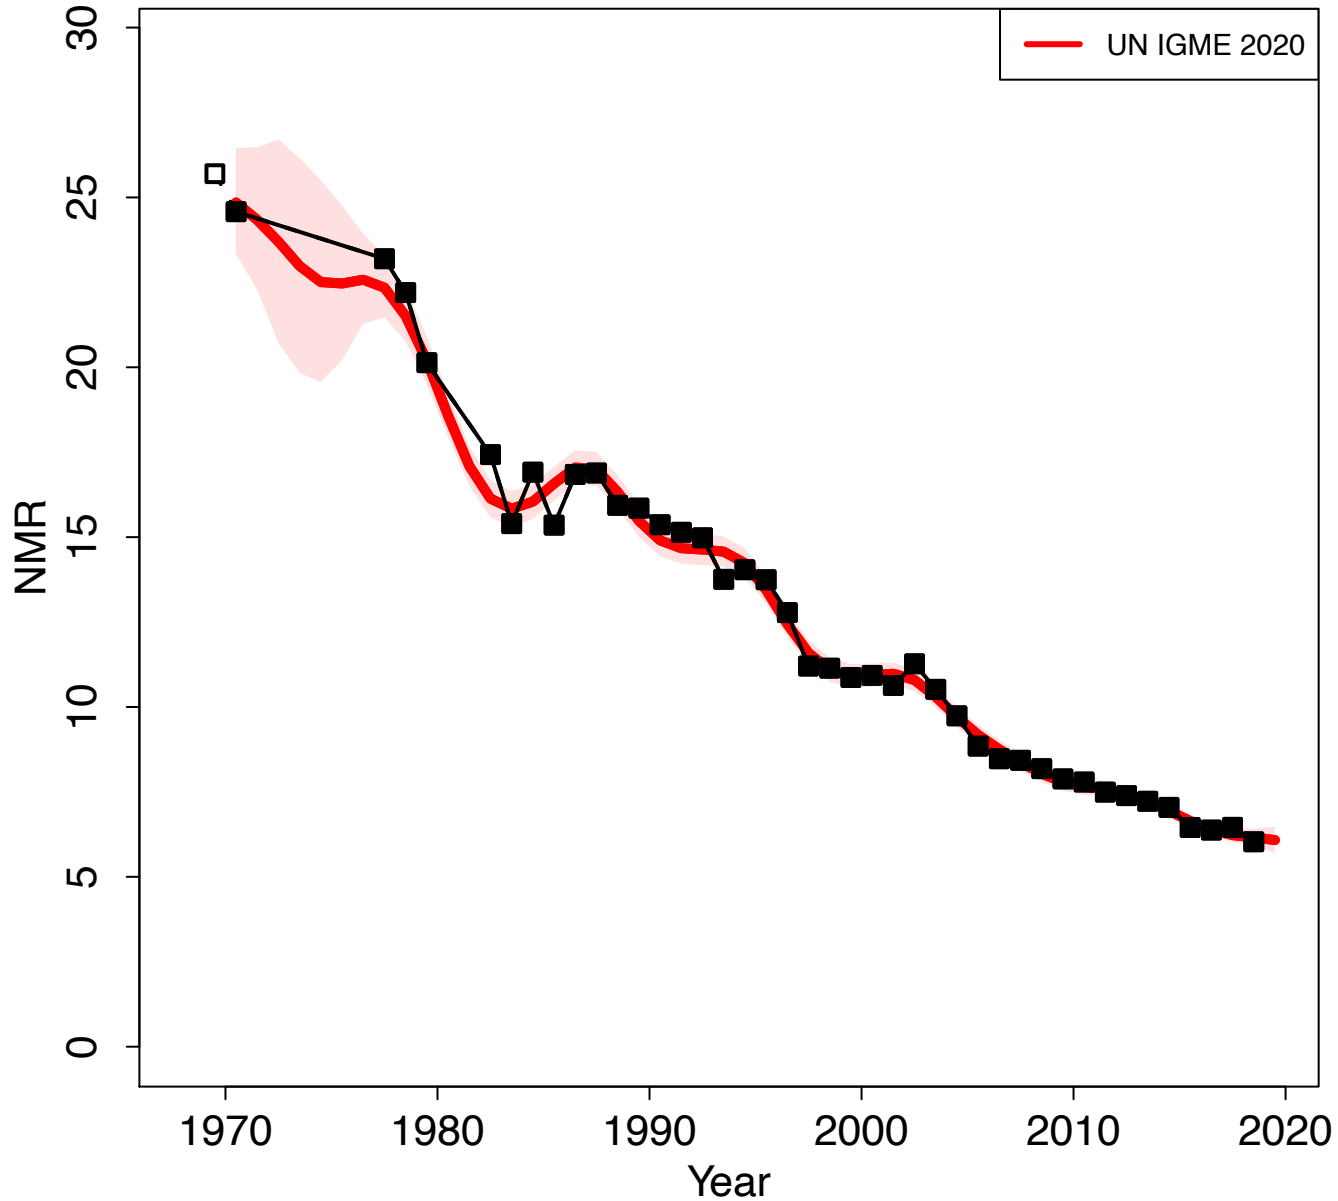

# Zoomed in

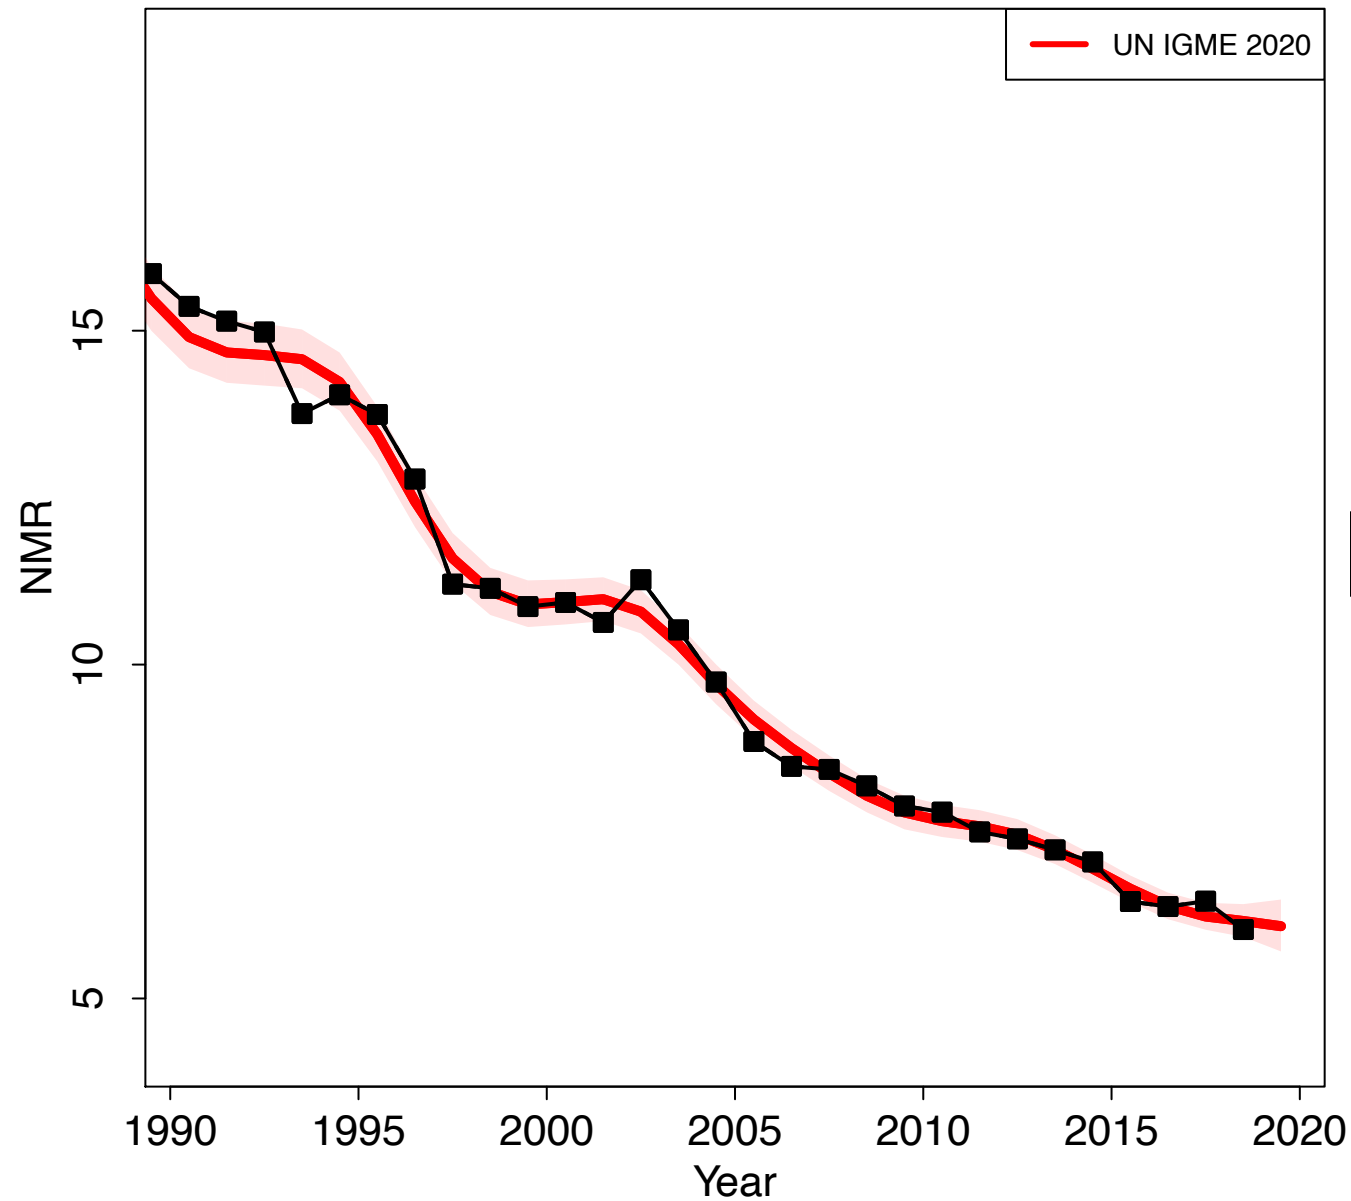

# Armenia

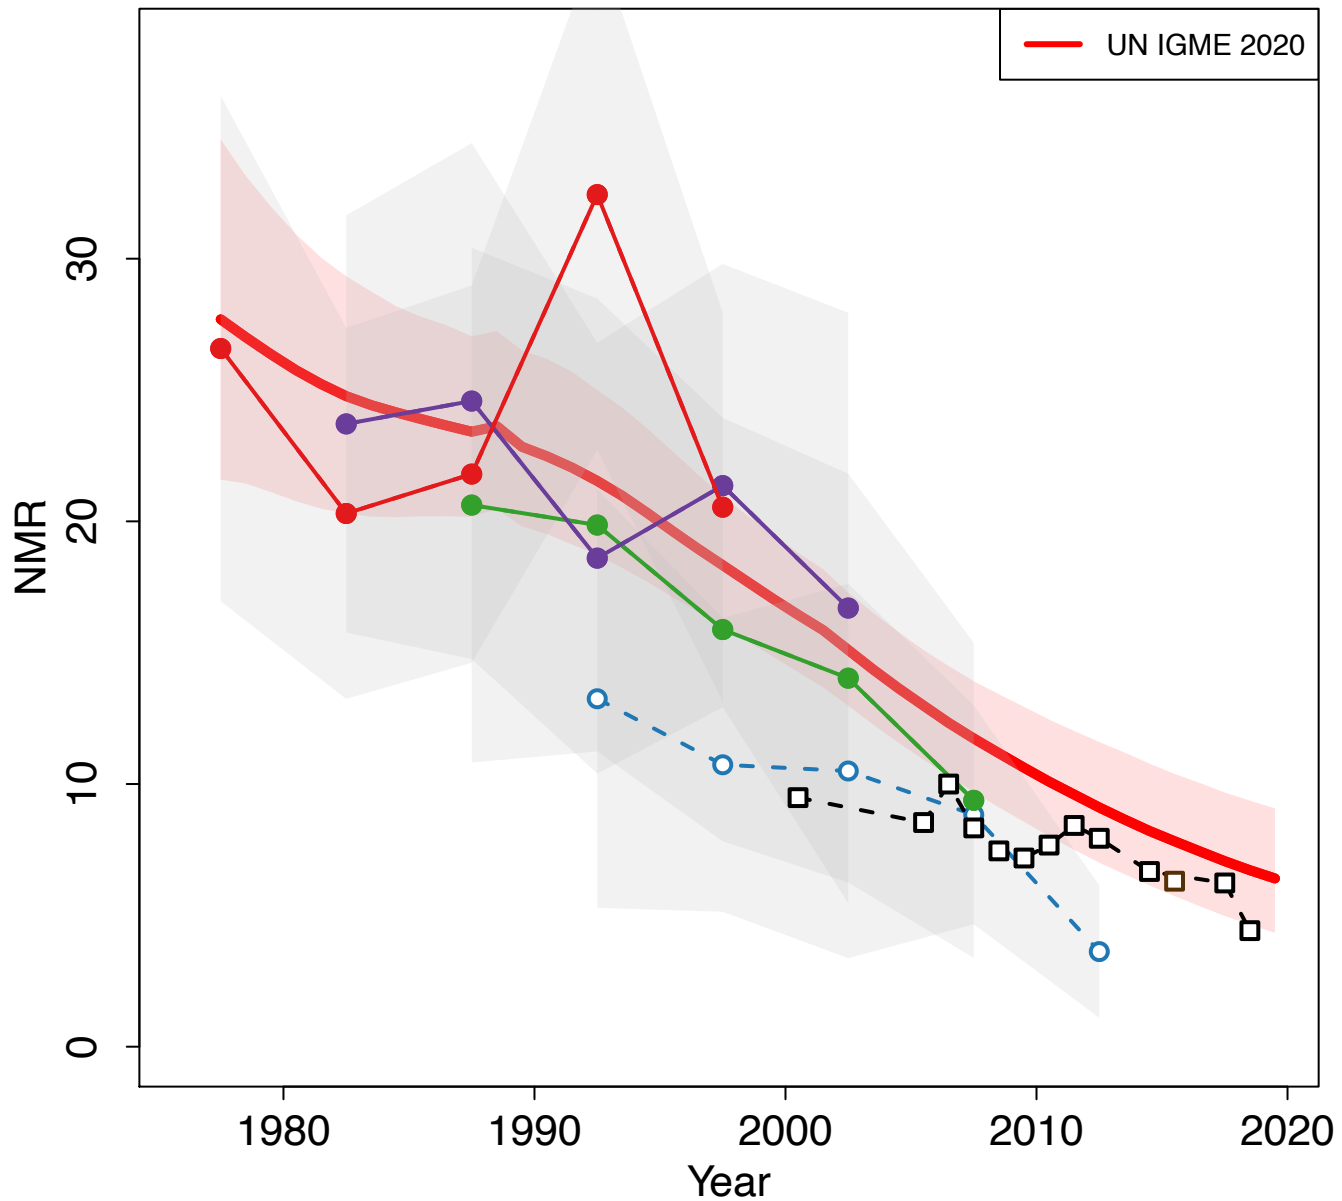

# Zoomed in

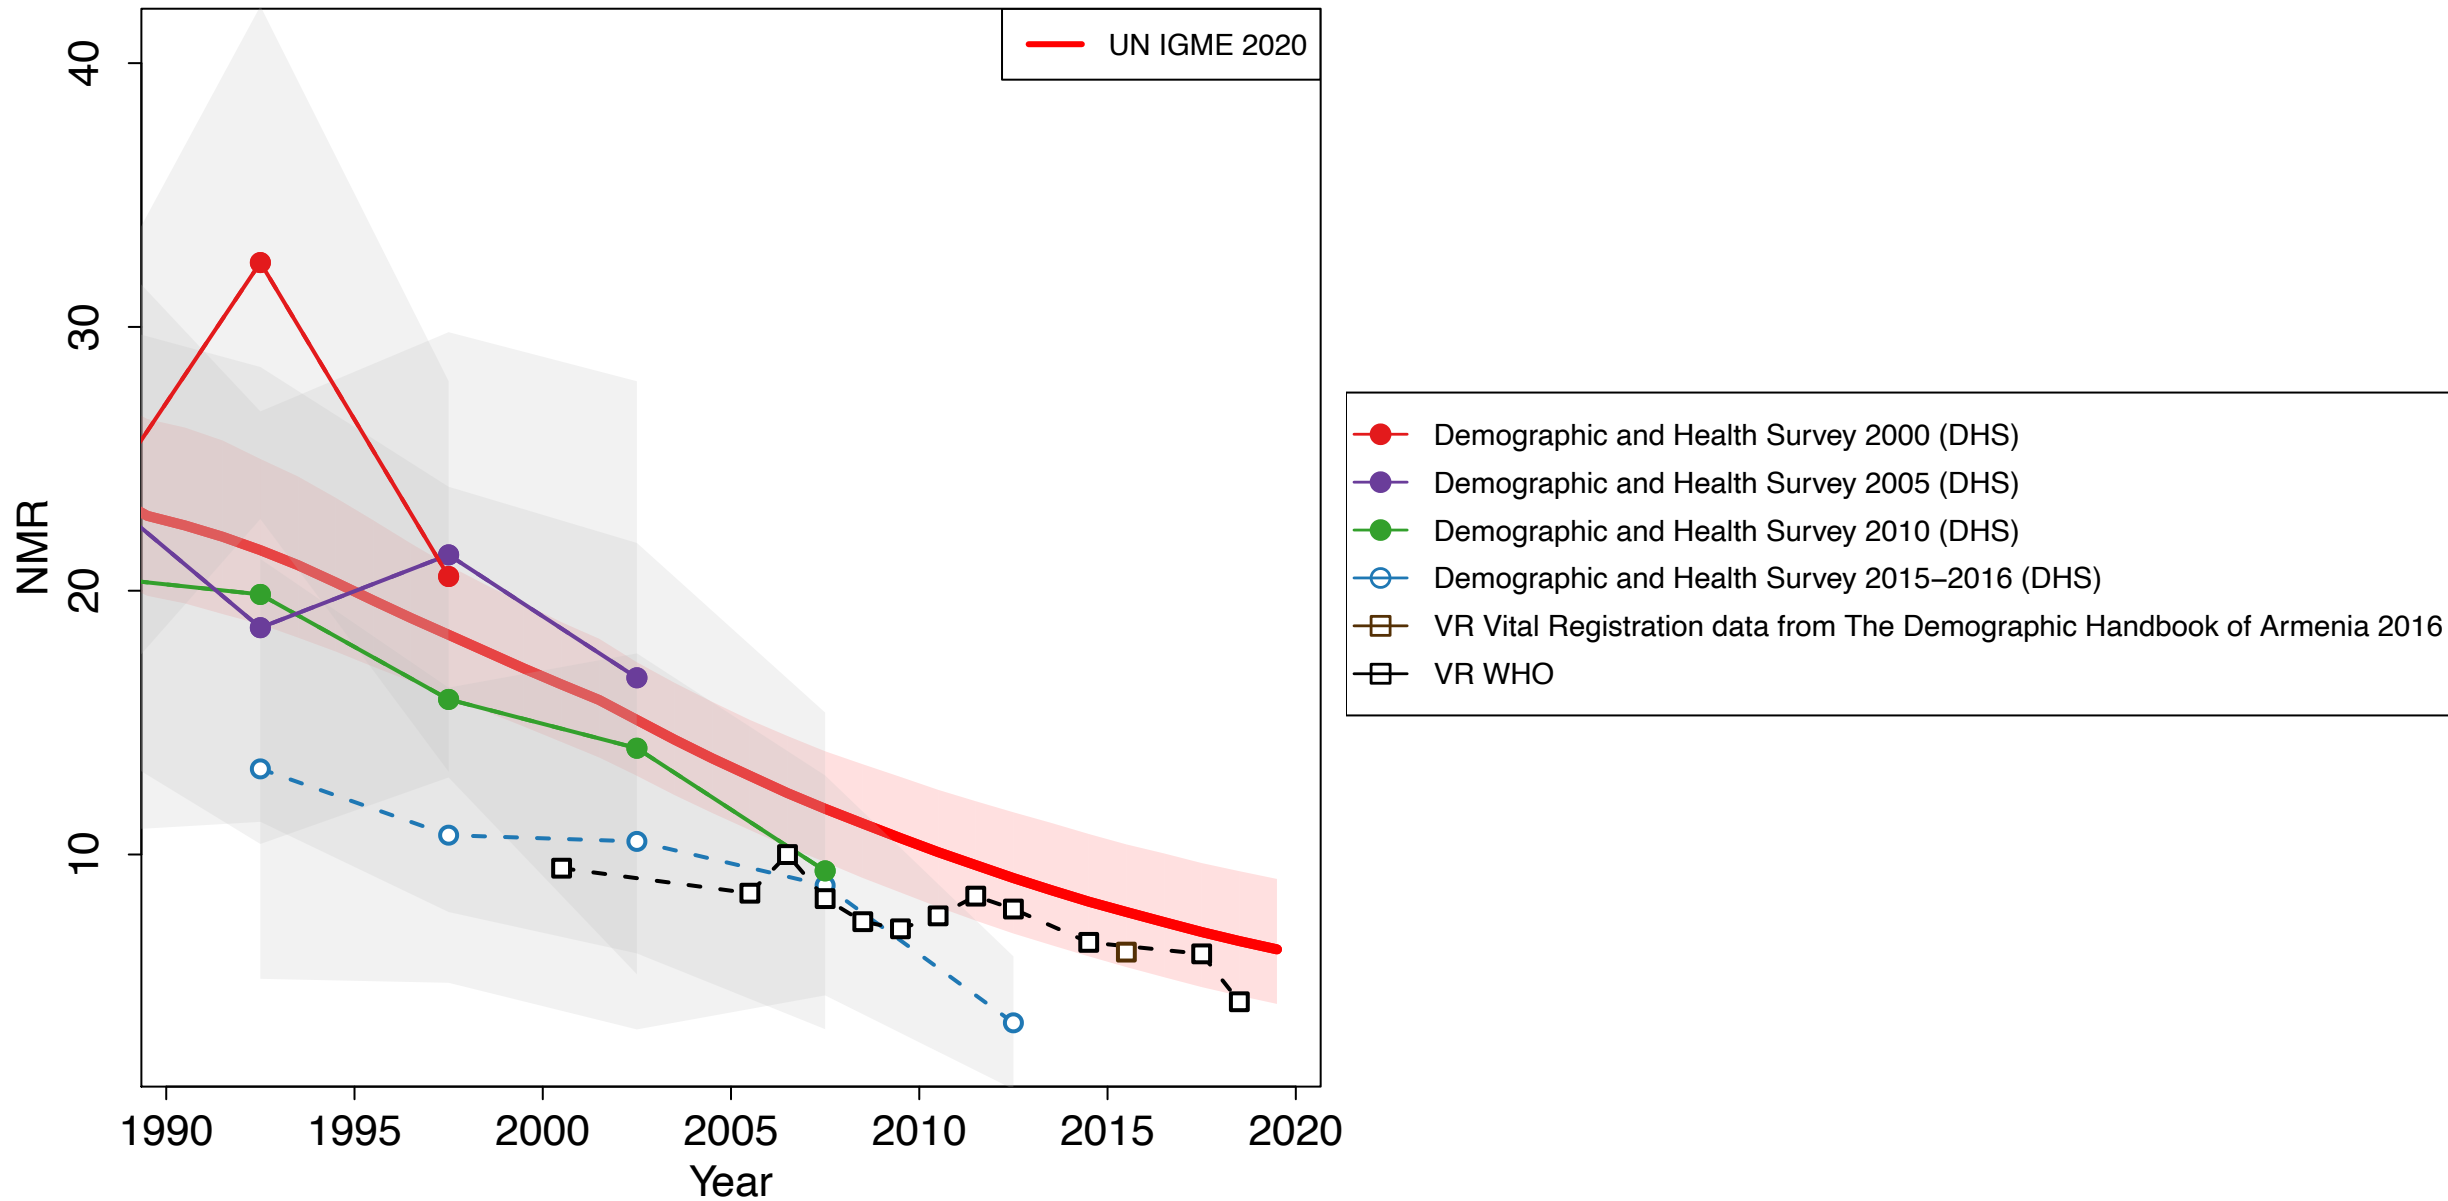

# Australia

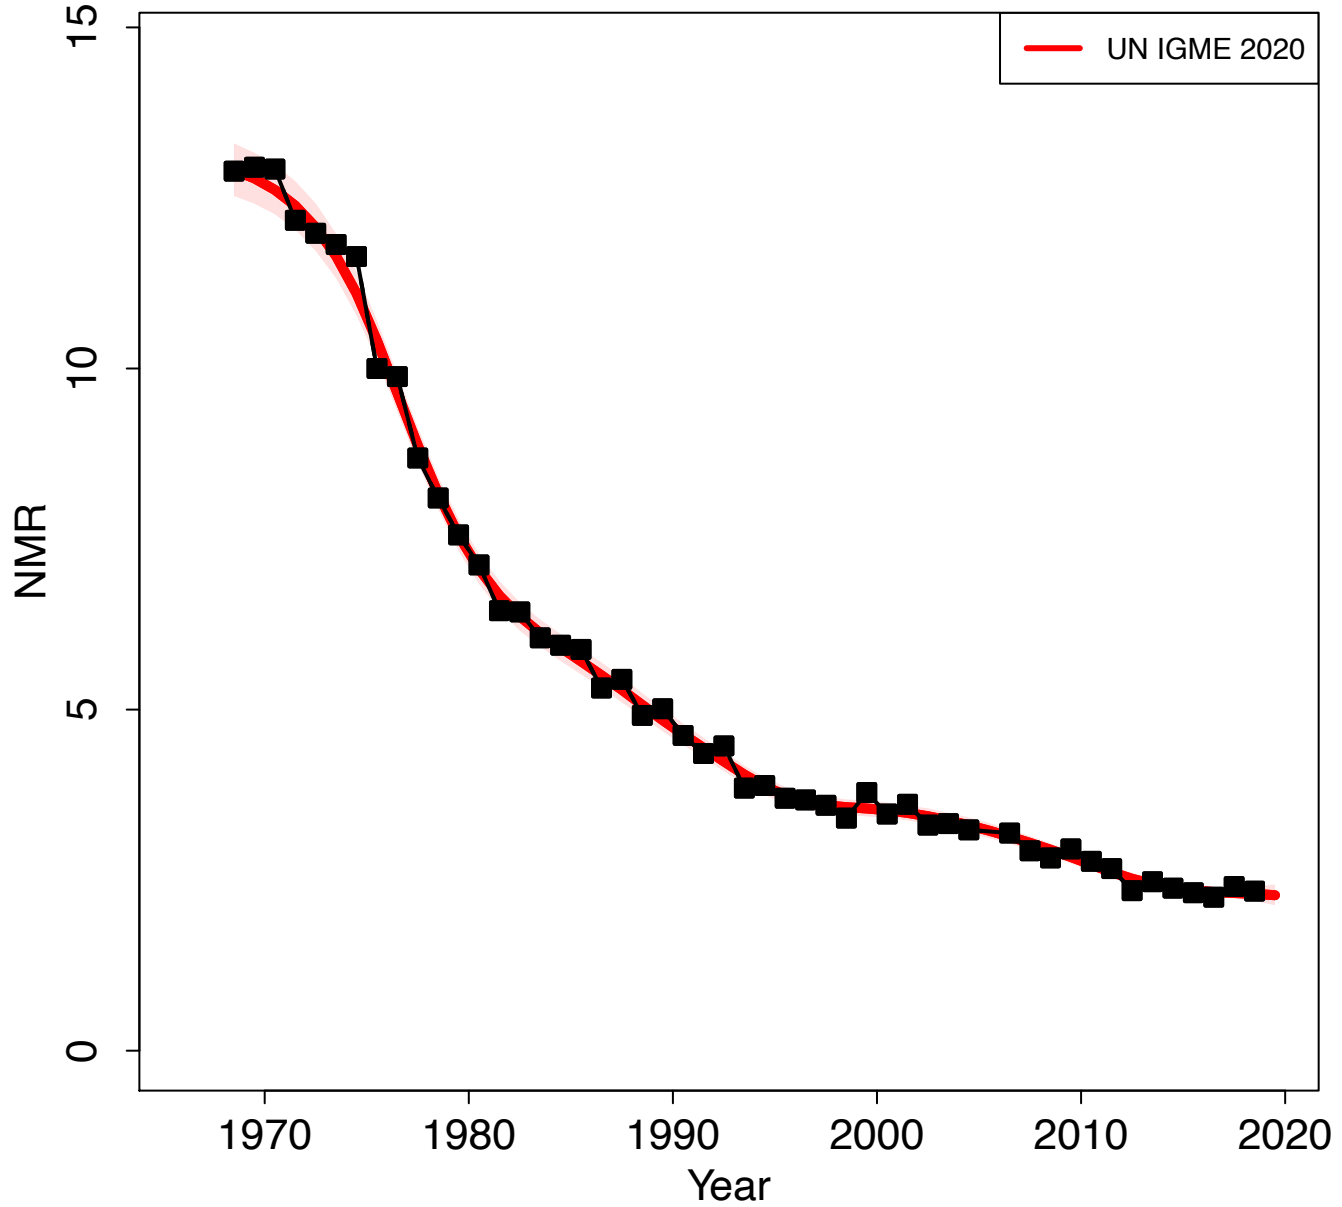

# Zoomed in

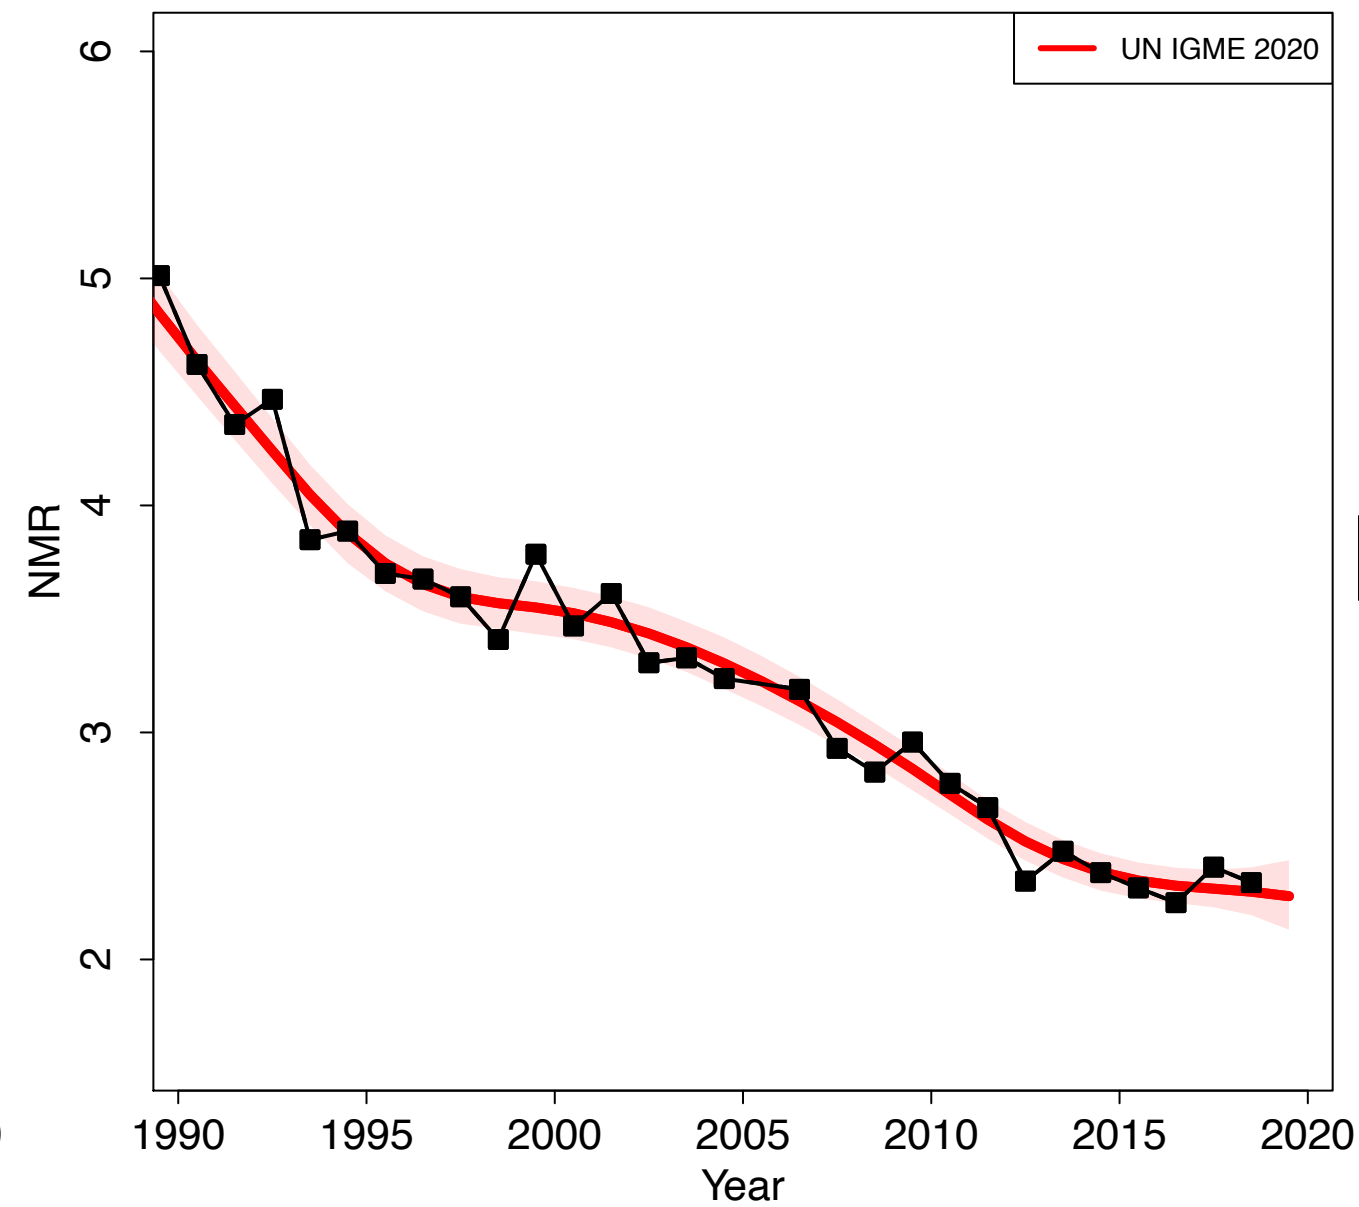

# Austria

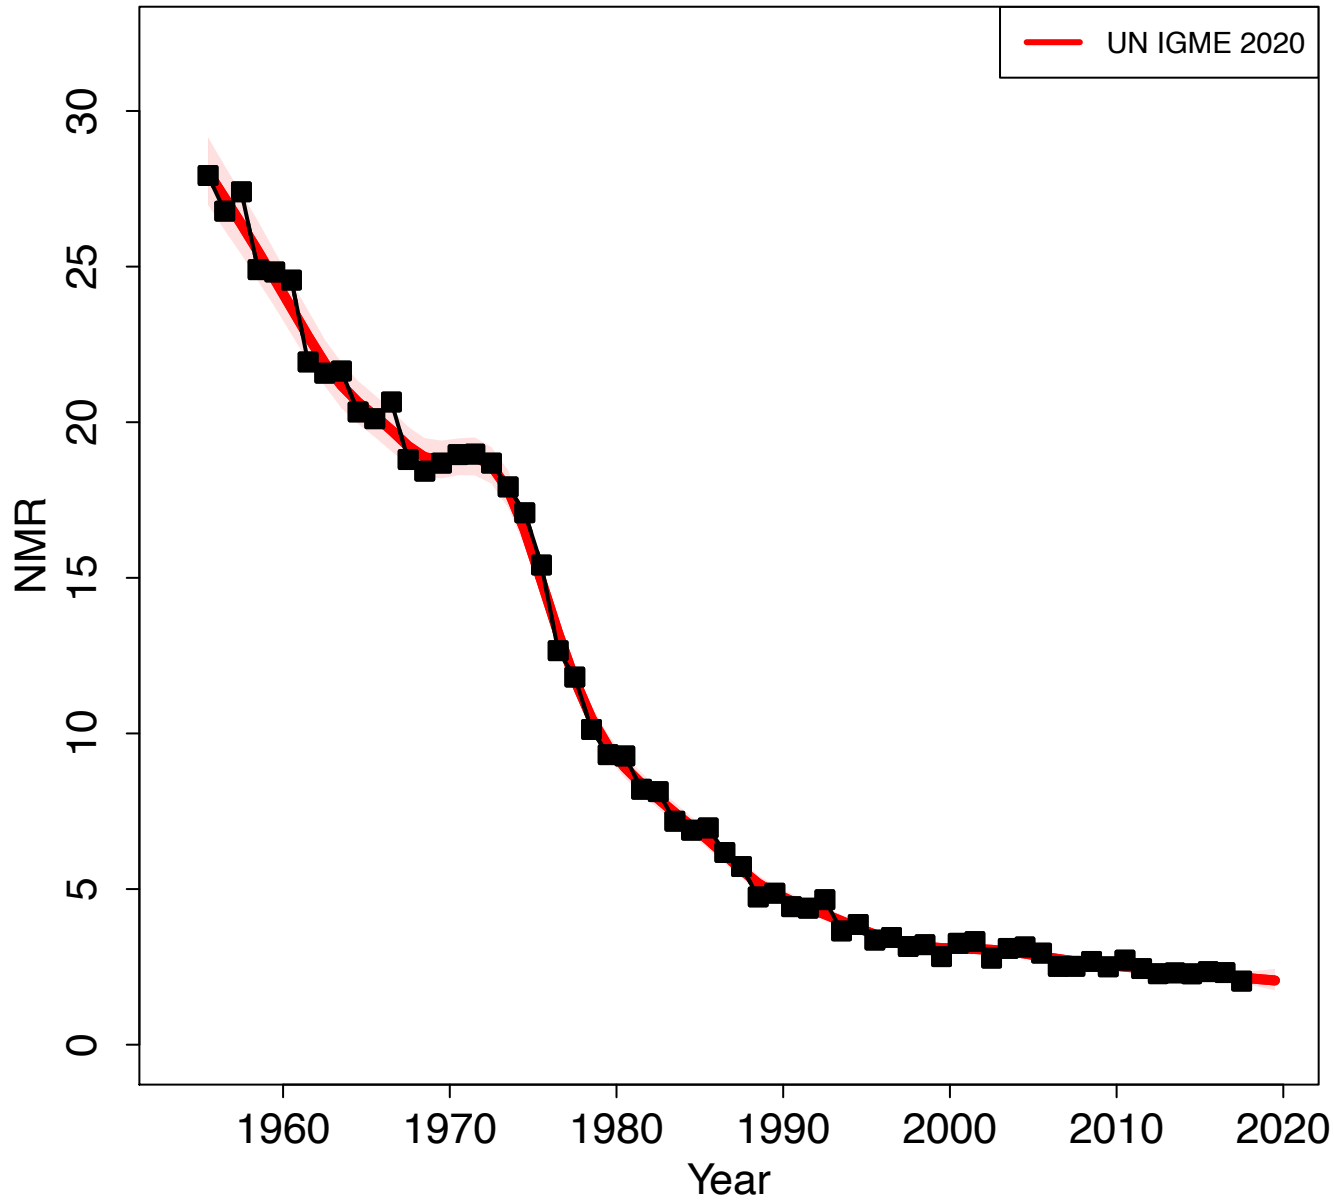

# Zoomed in

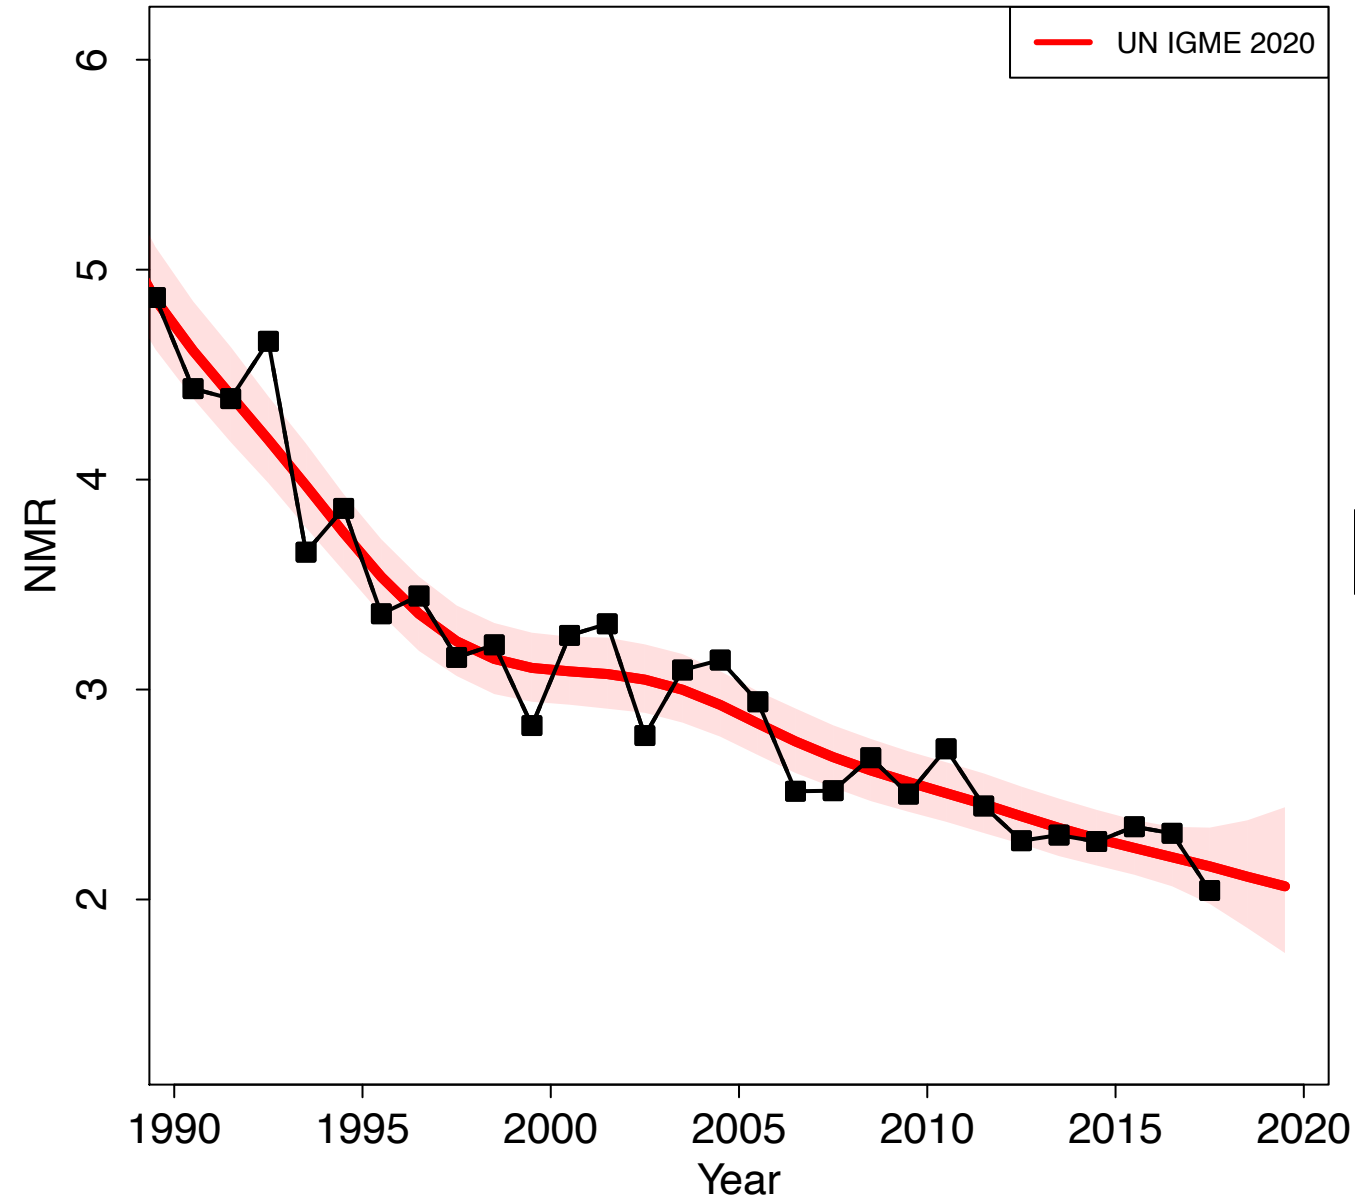

# Azerbaijan

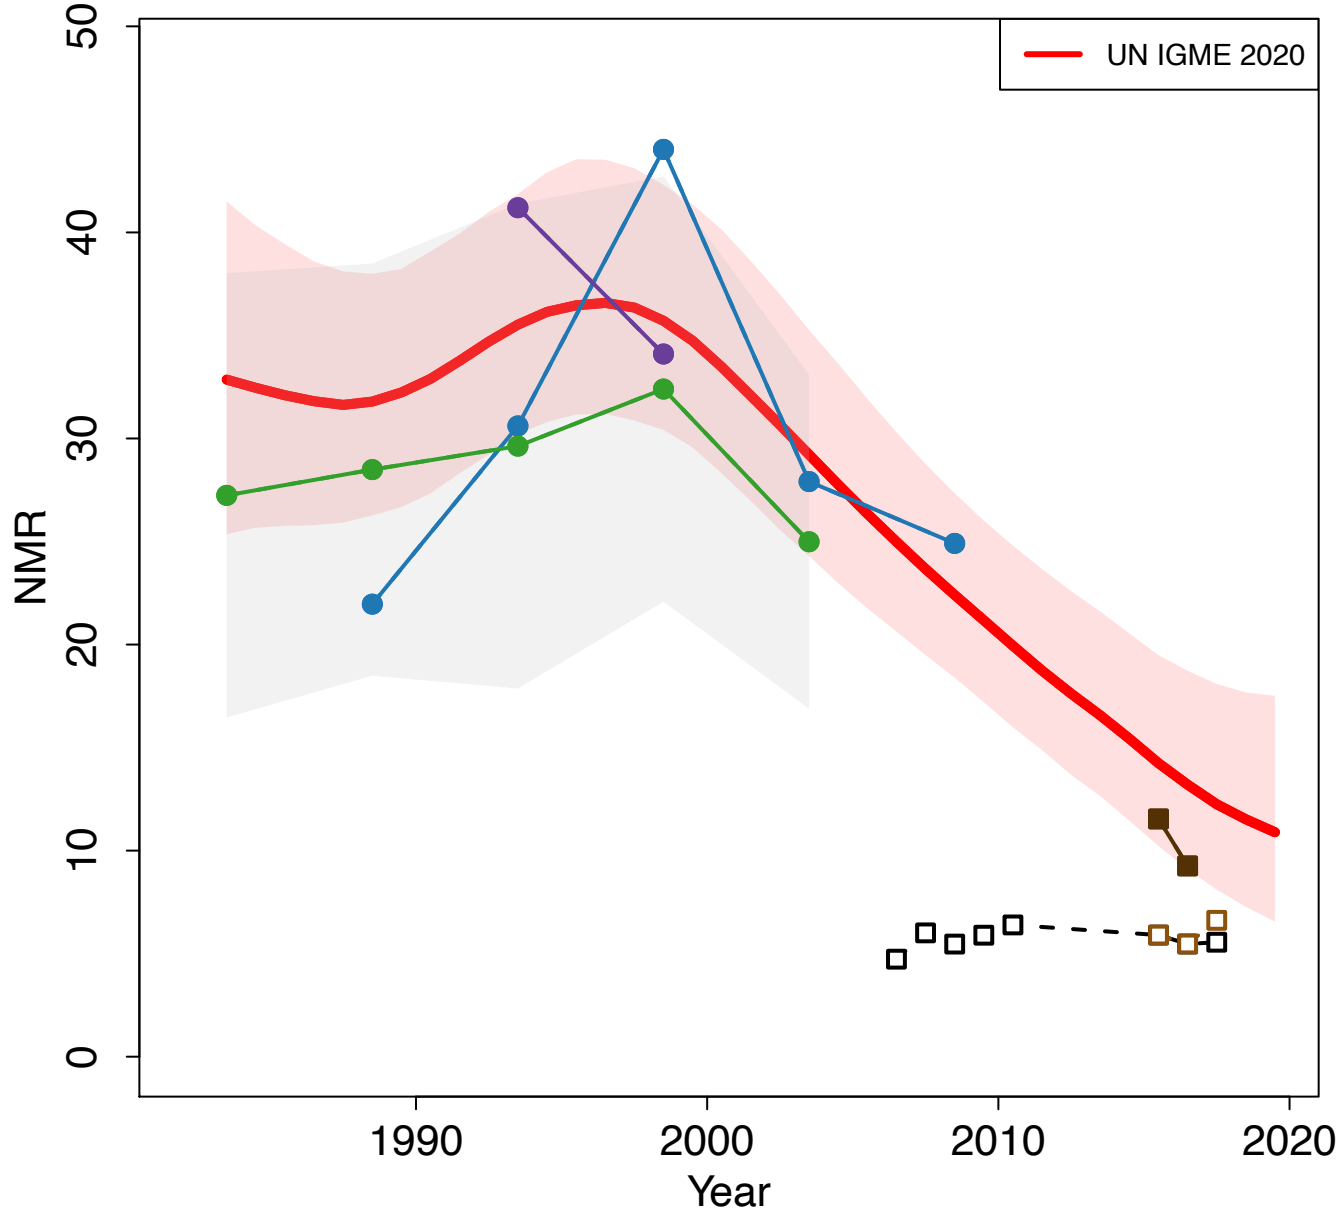

# Zoomed in

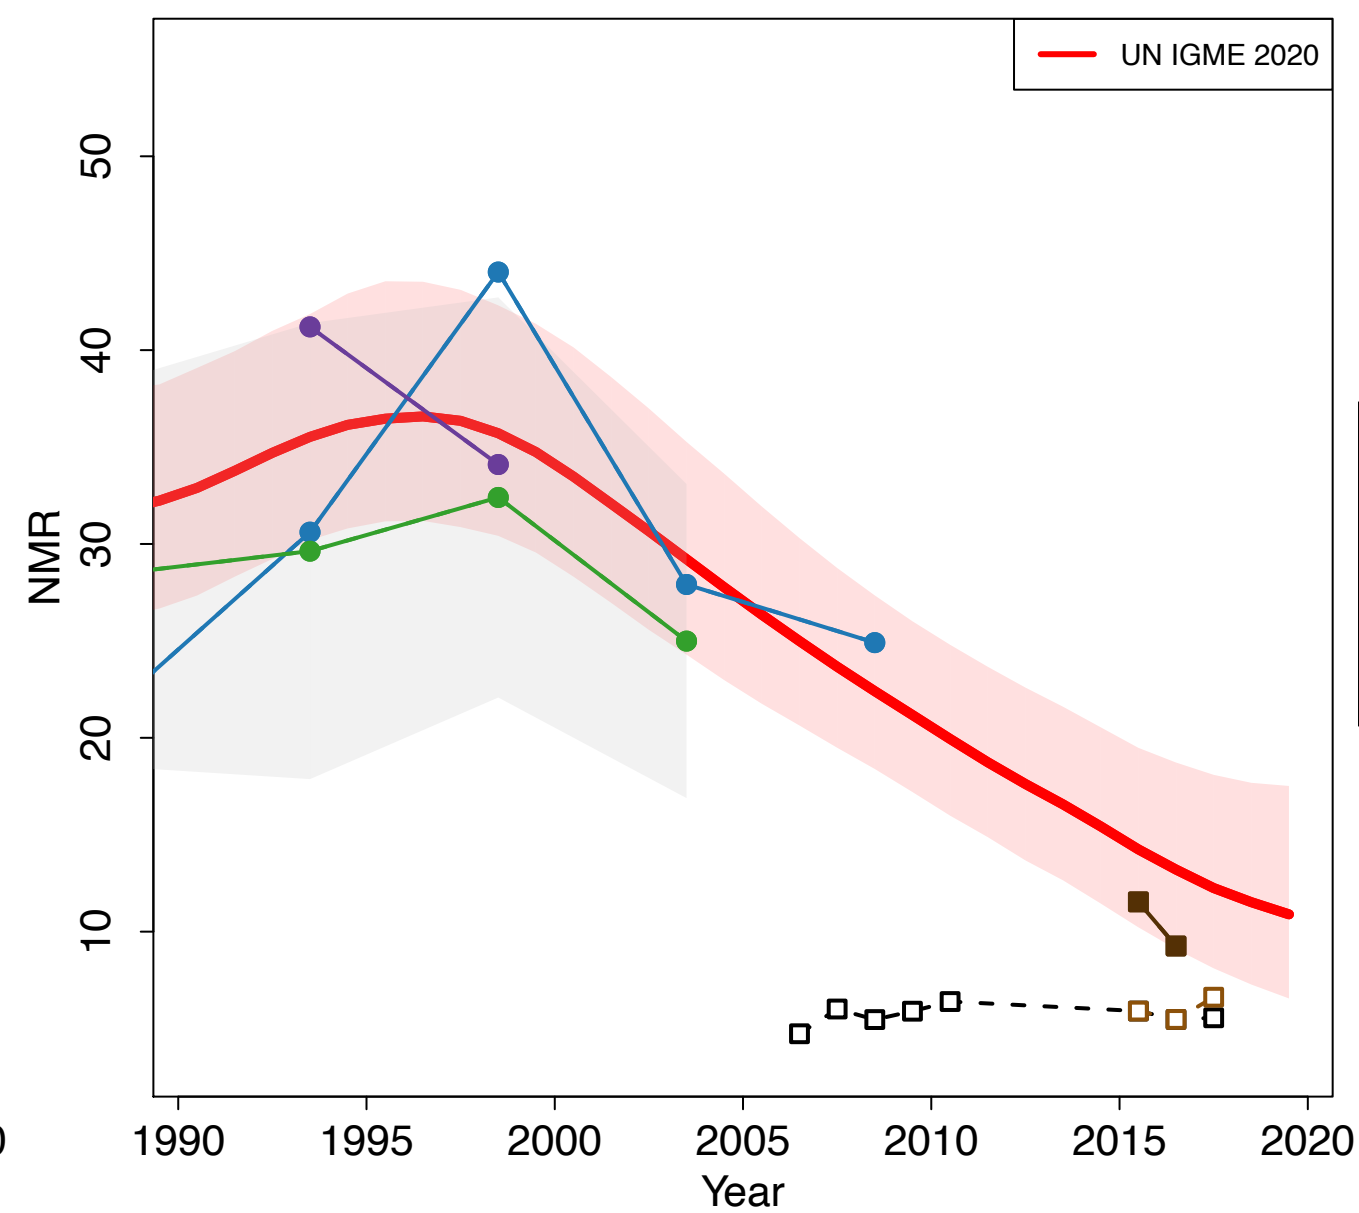



# Bahamas

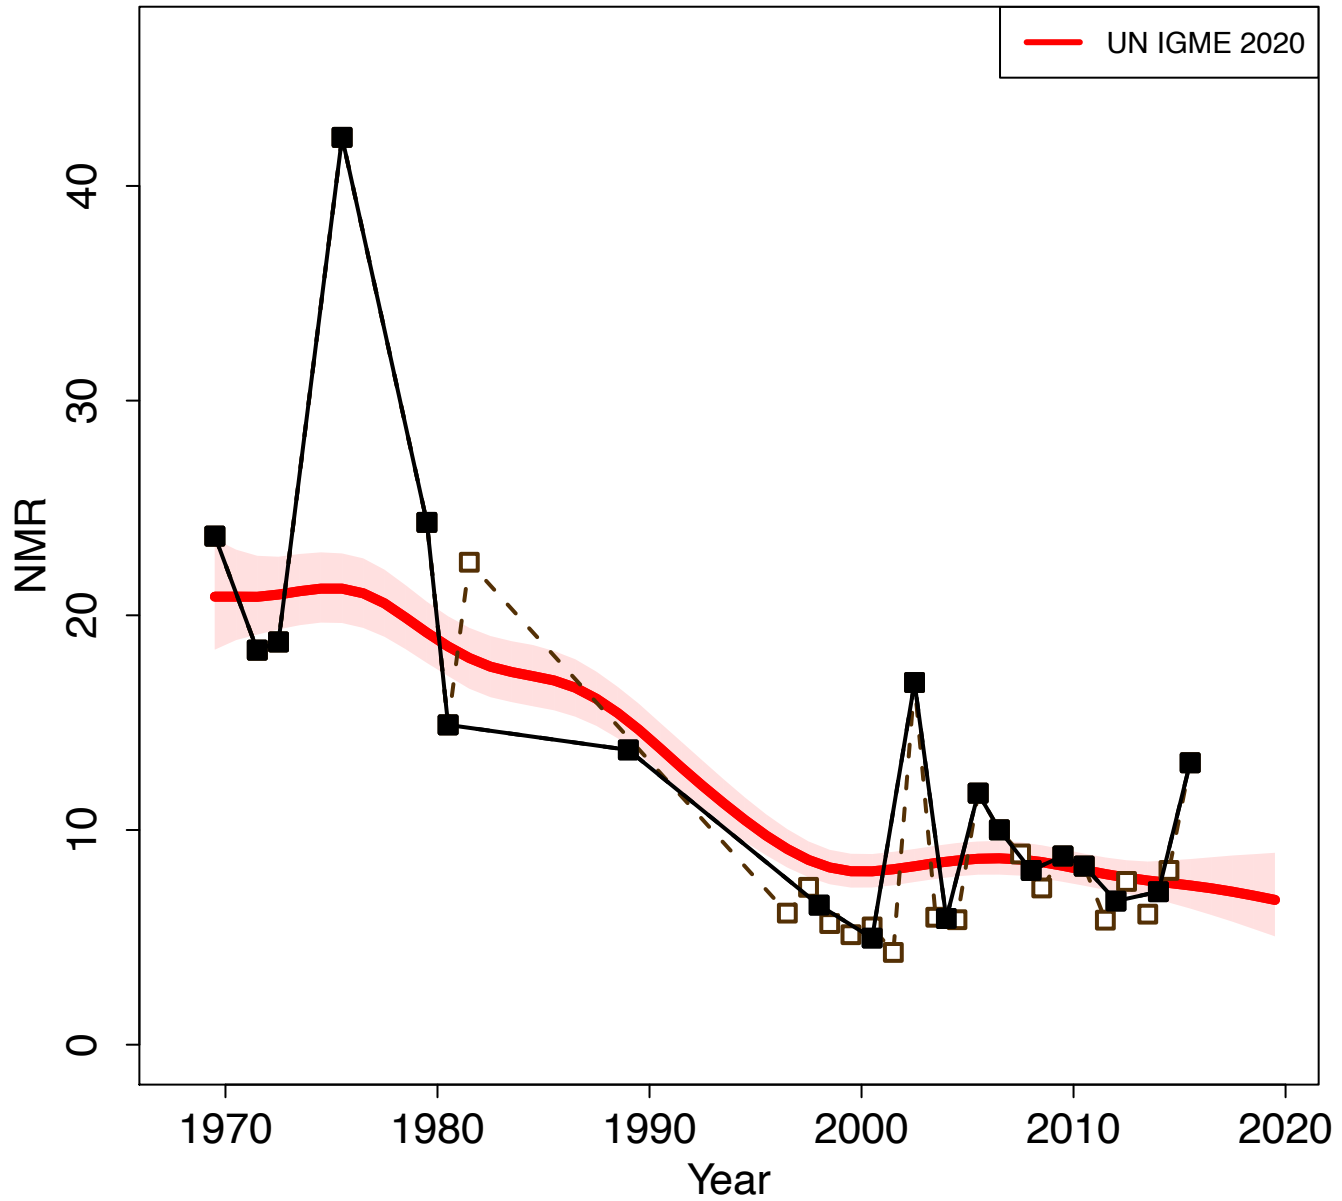

# Zoomed in

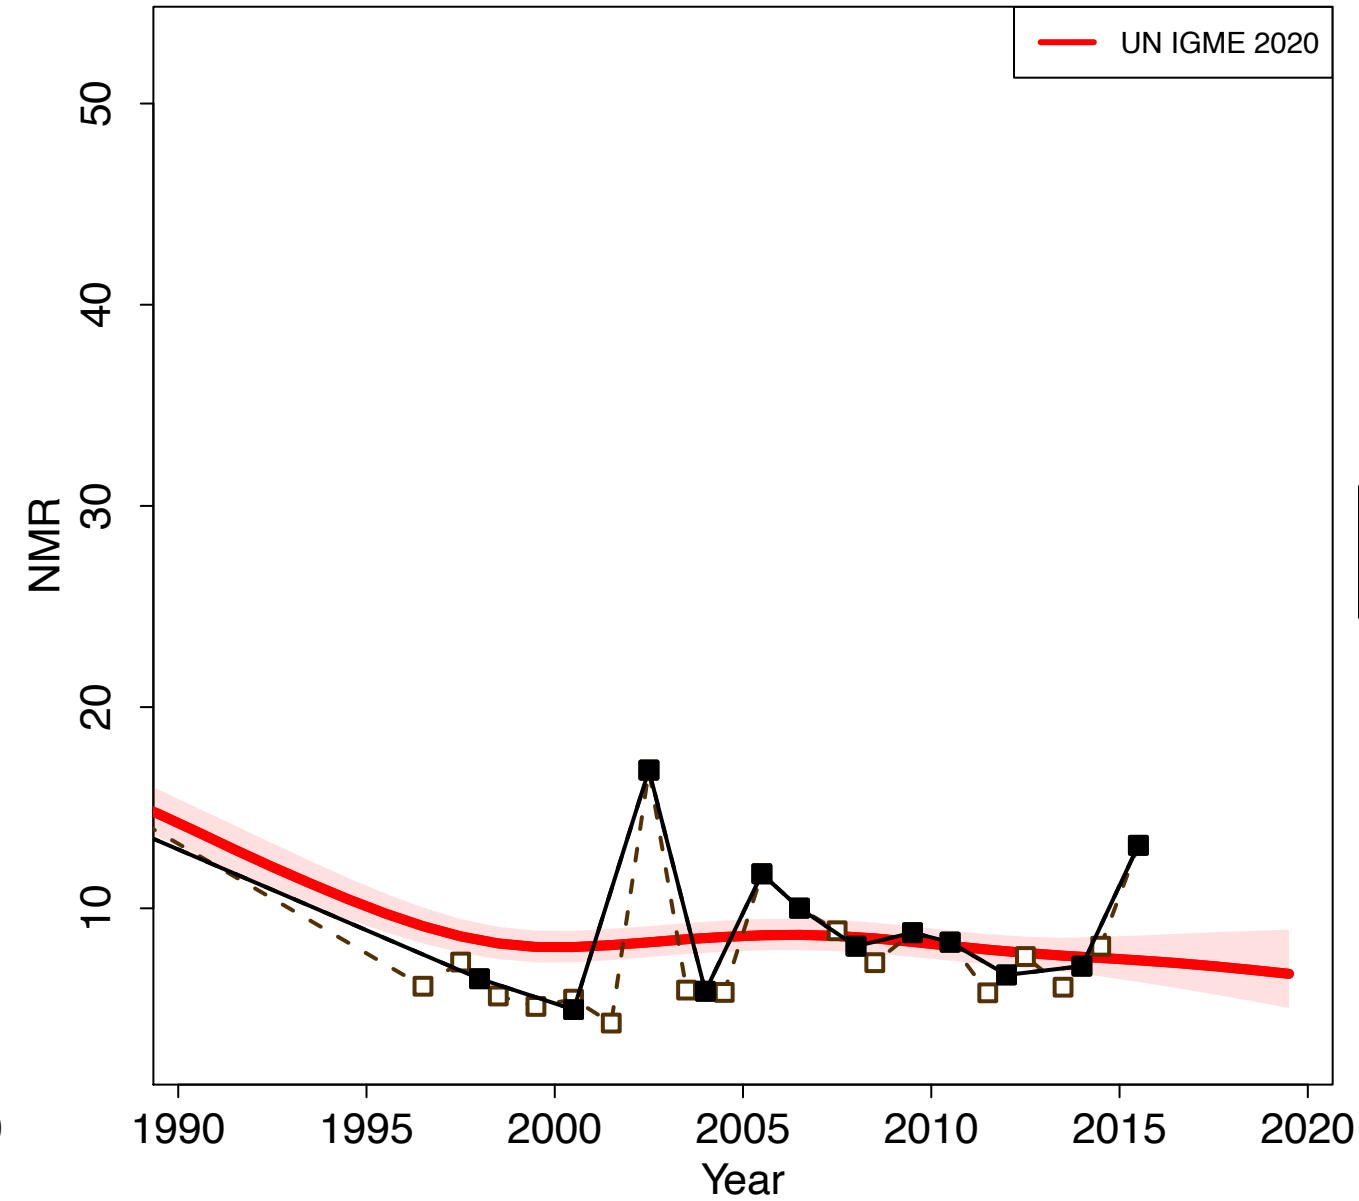

# Bahrain

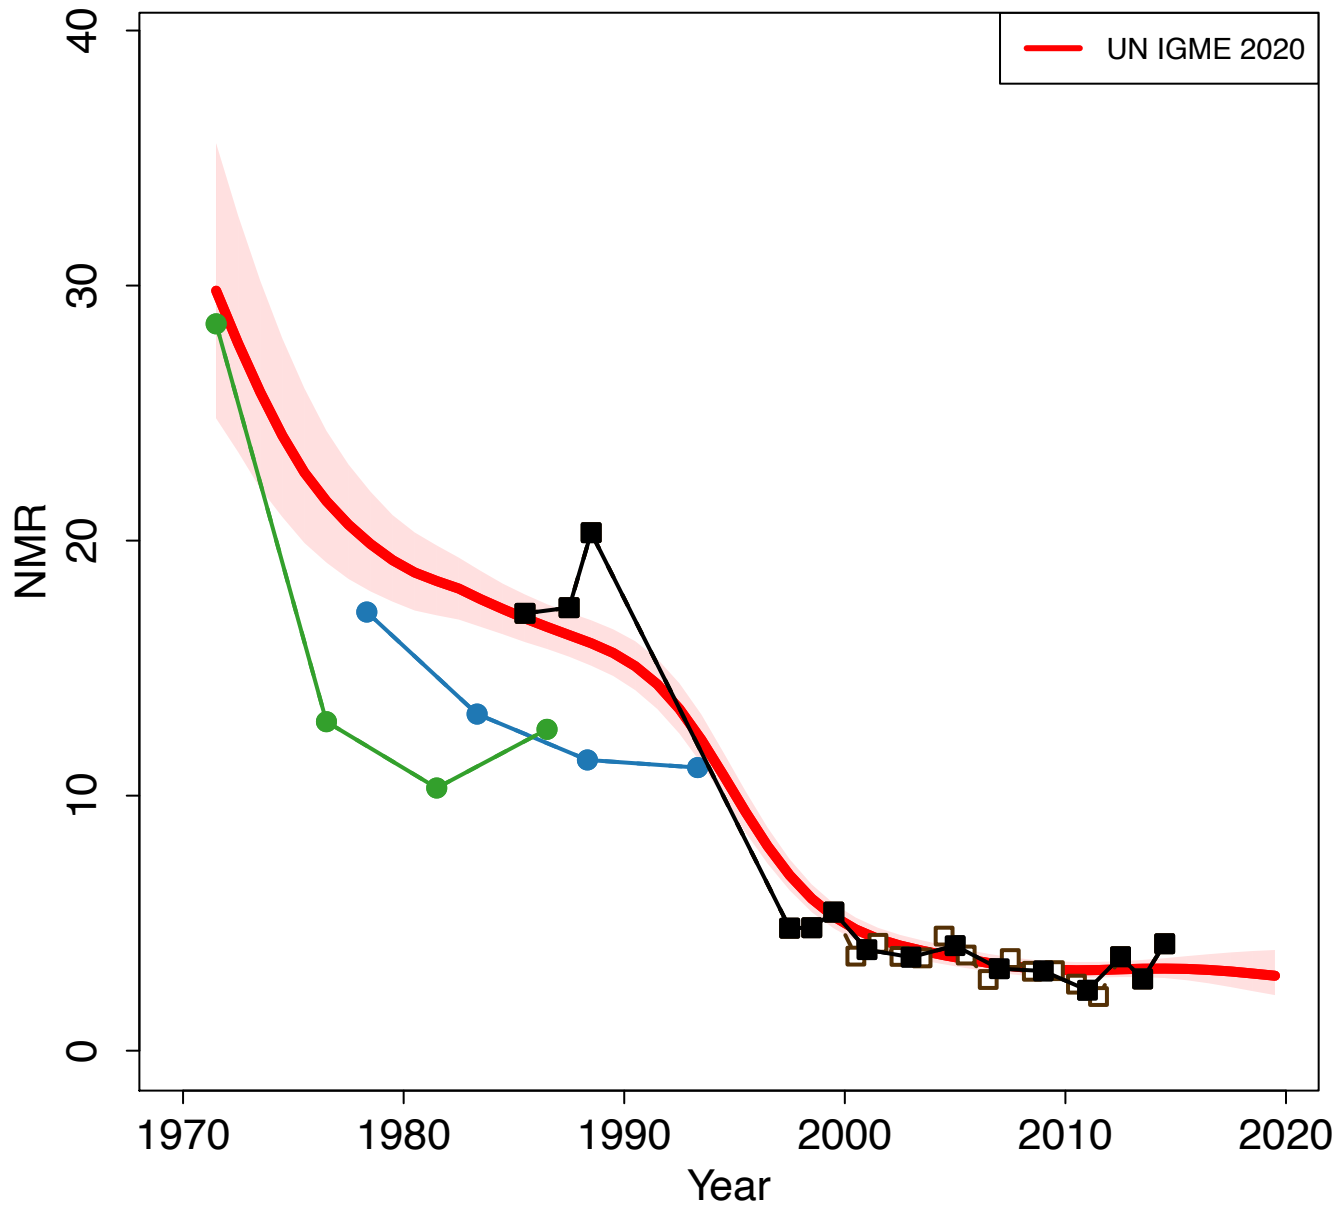

# Zoomed in

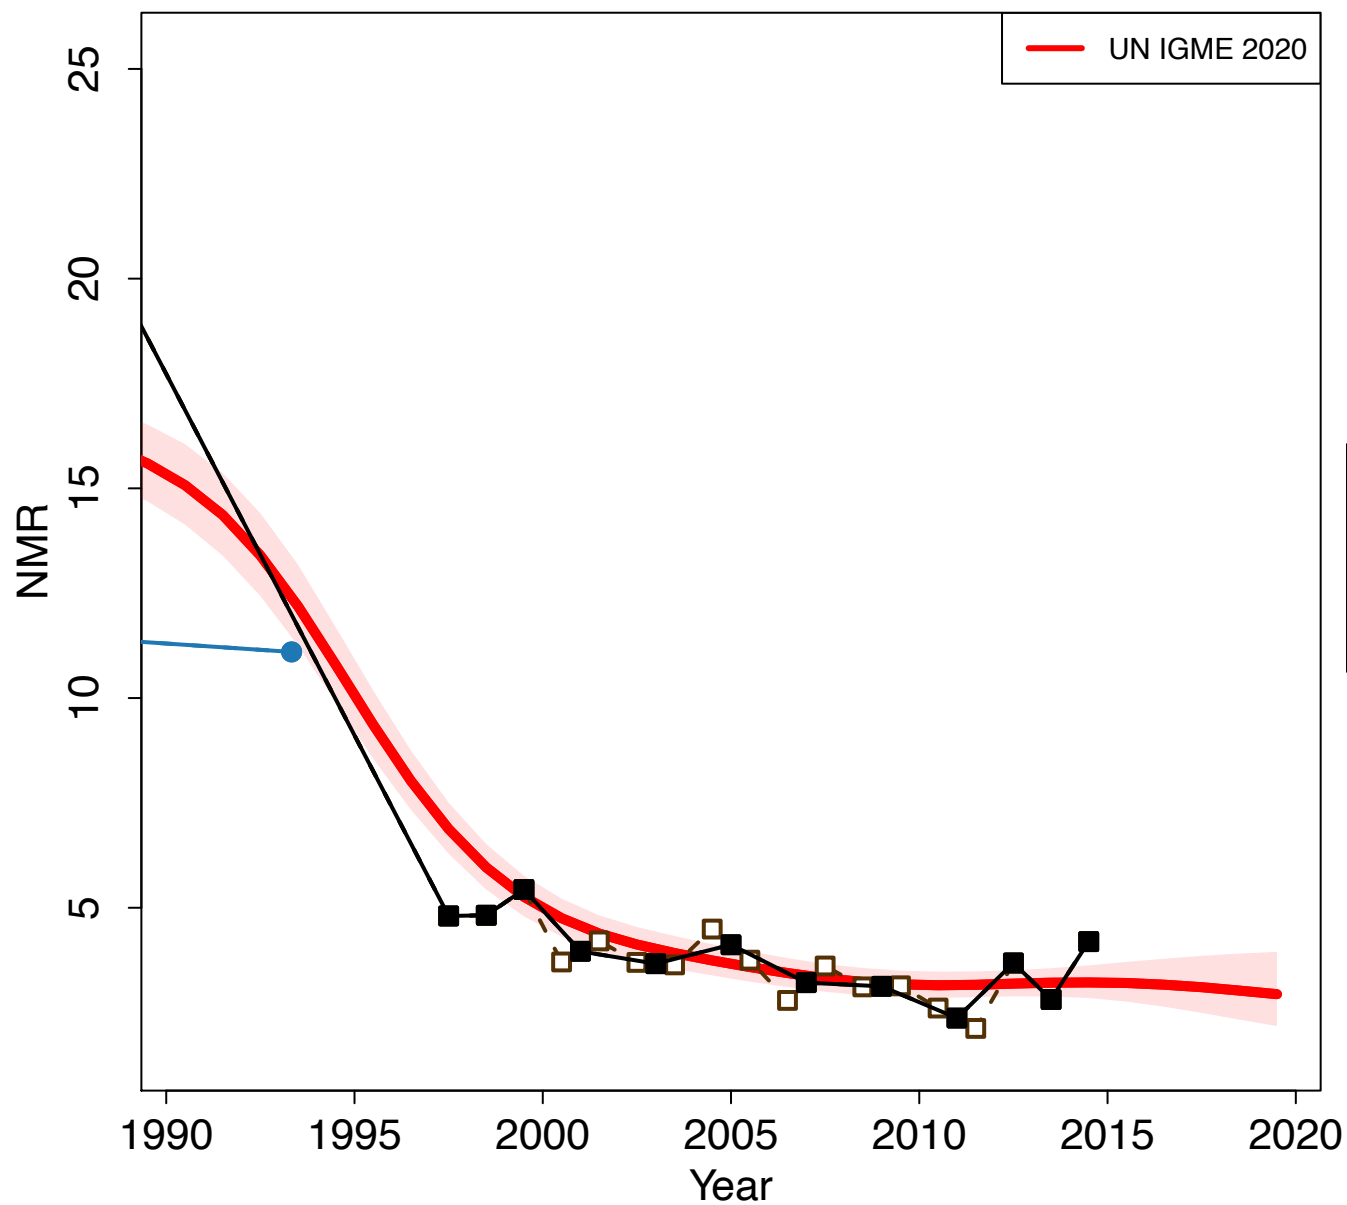

# Bangladesh

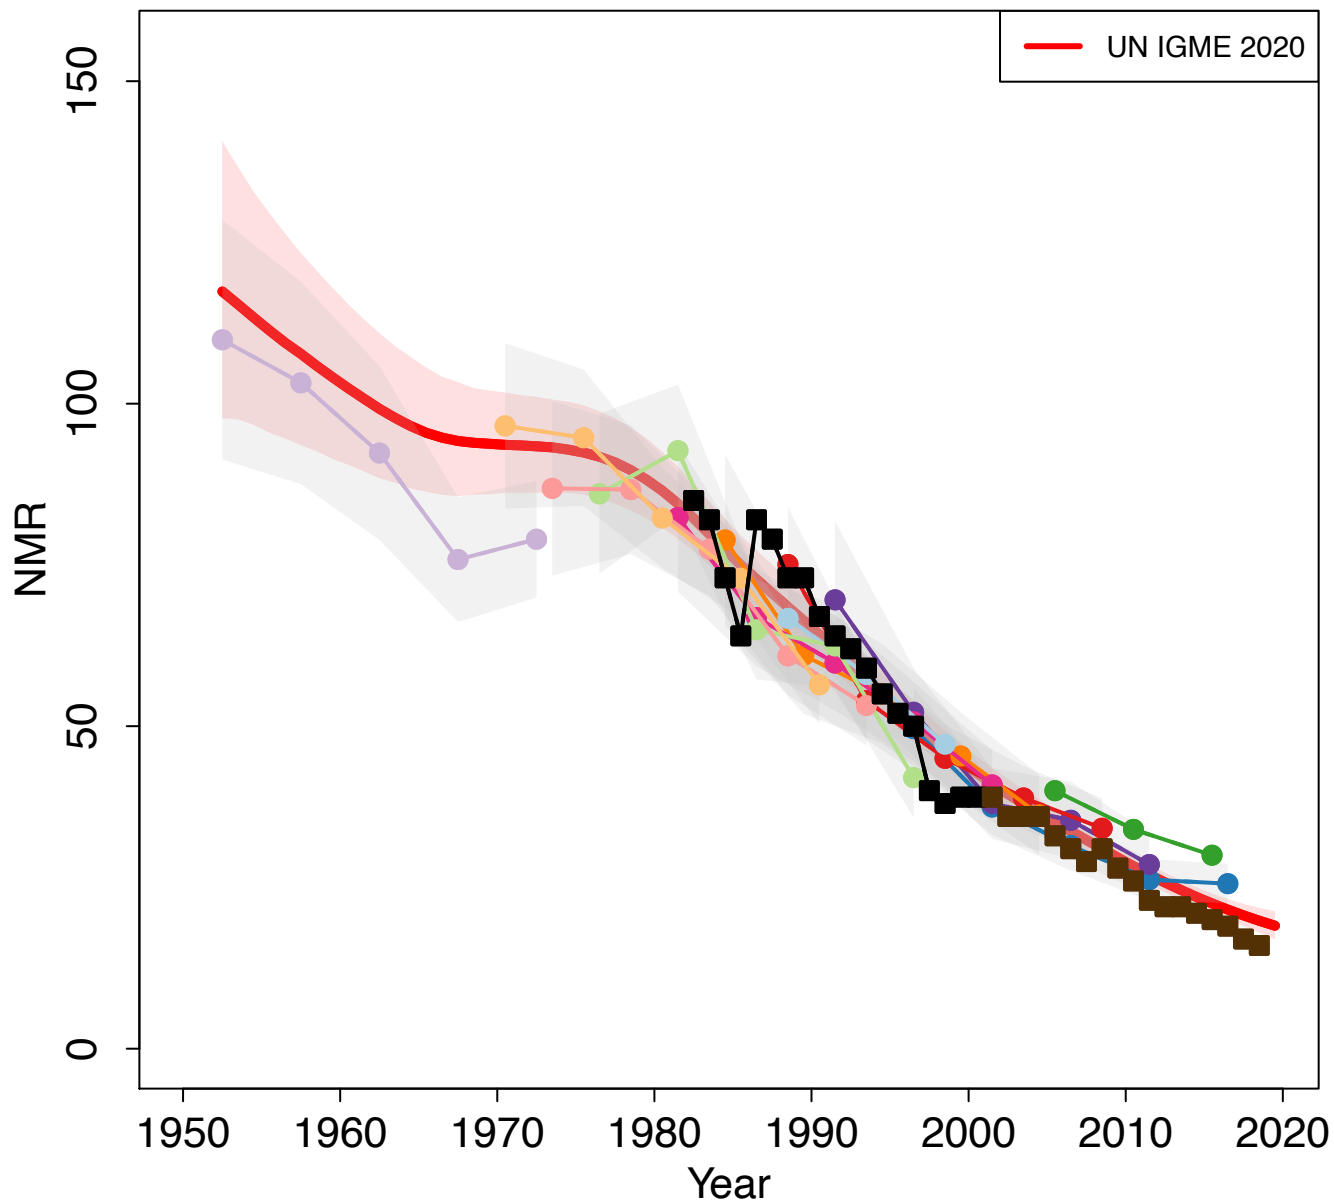

# Zoomed in

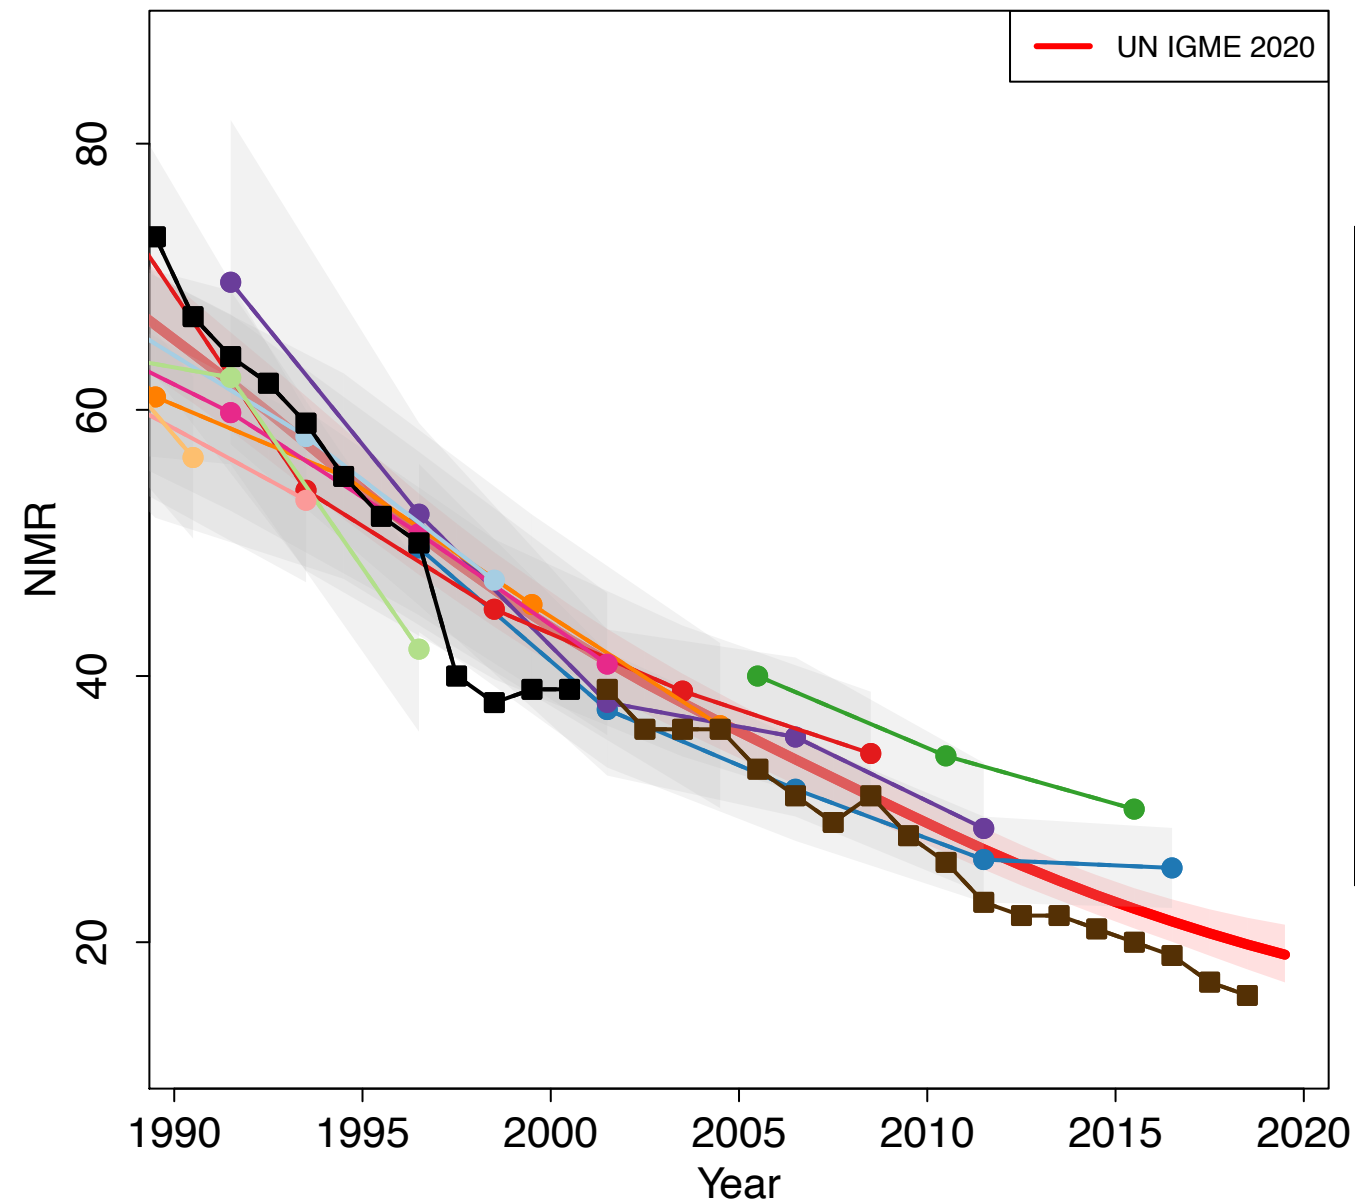

# Barbados

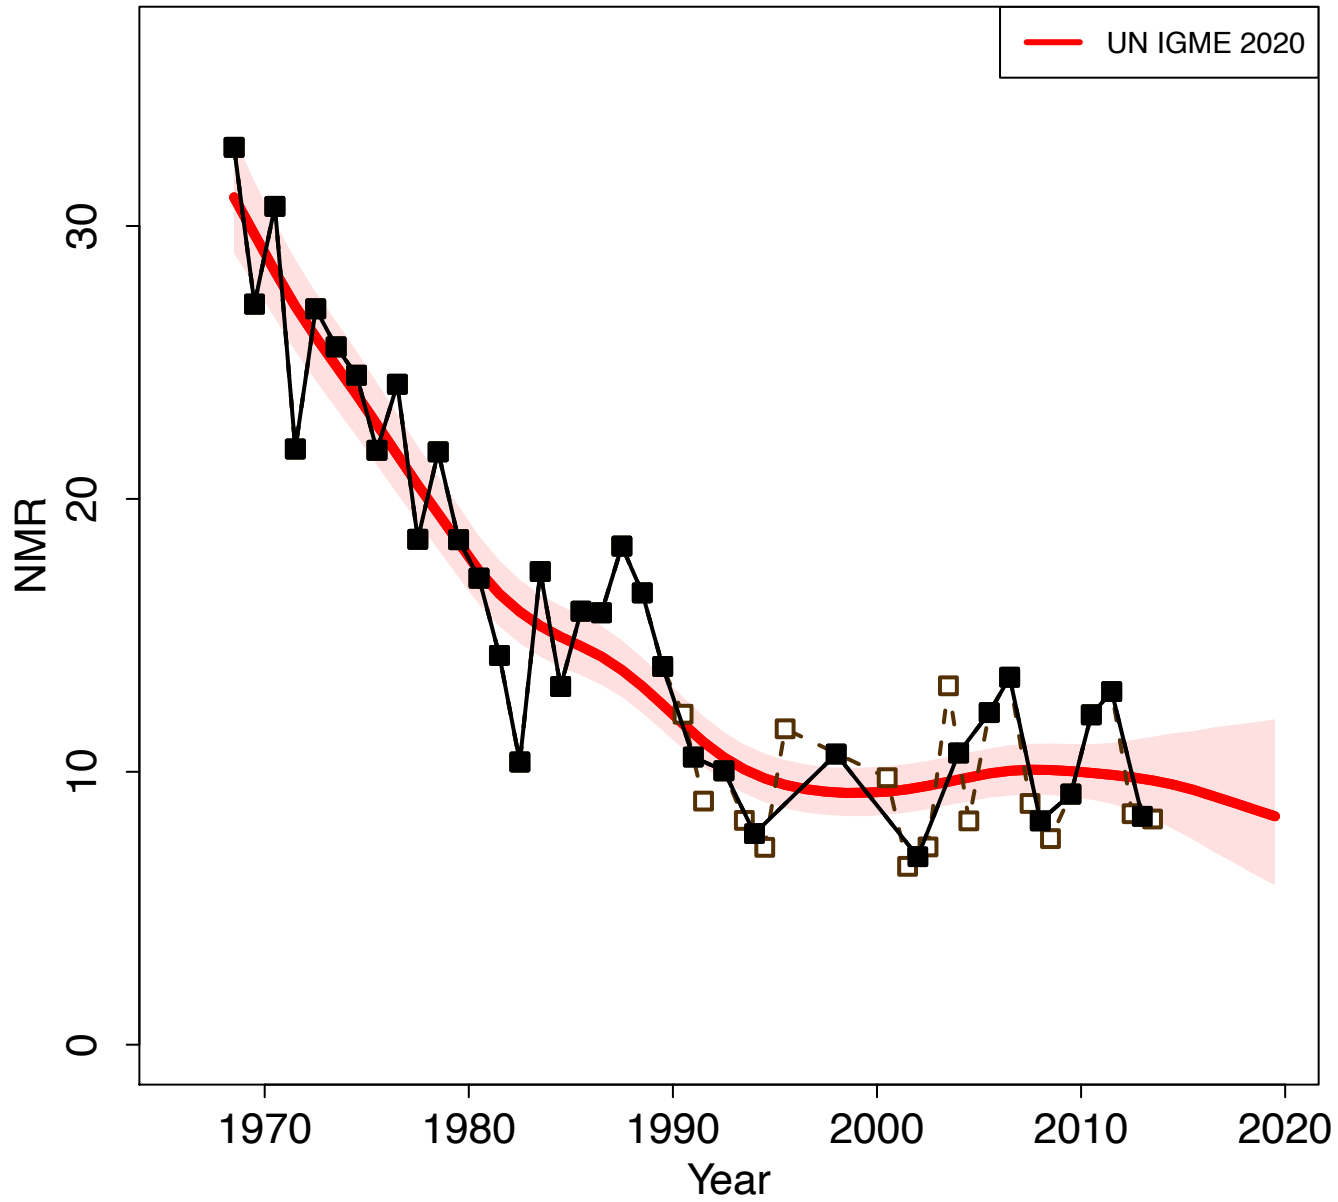

# Zoomed in

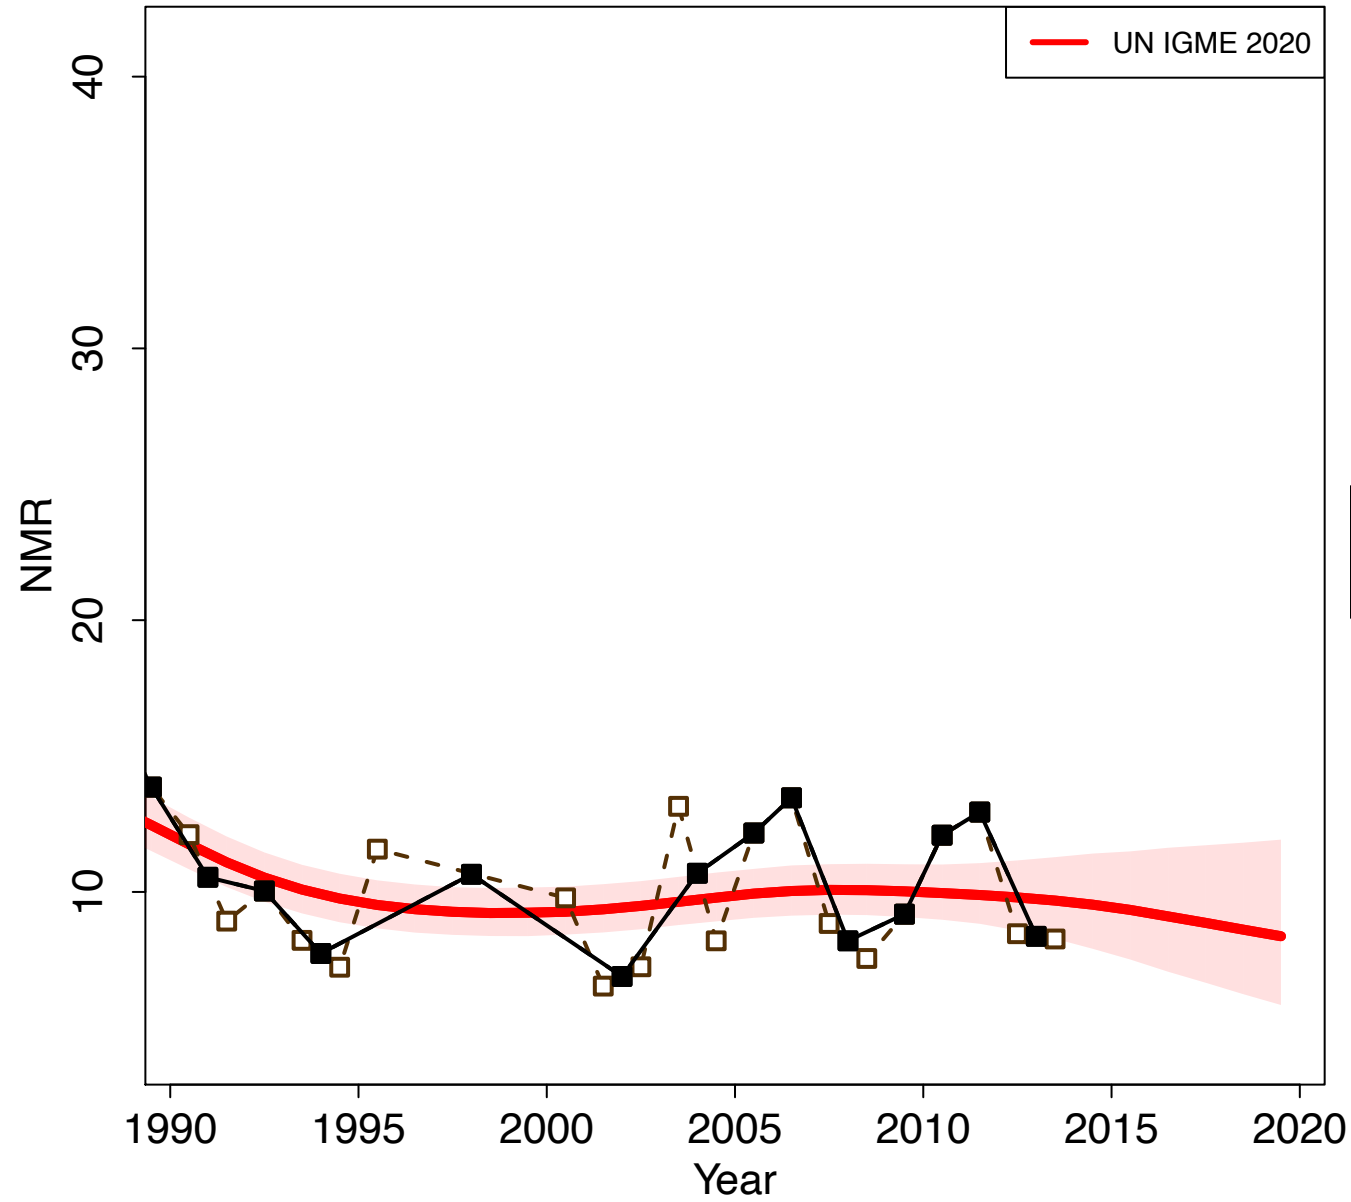

# Belarus

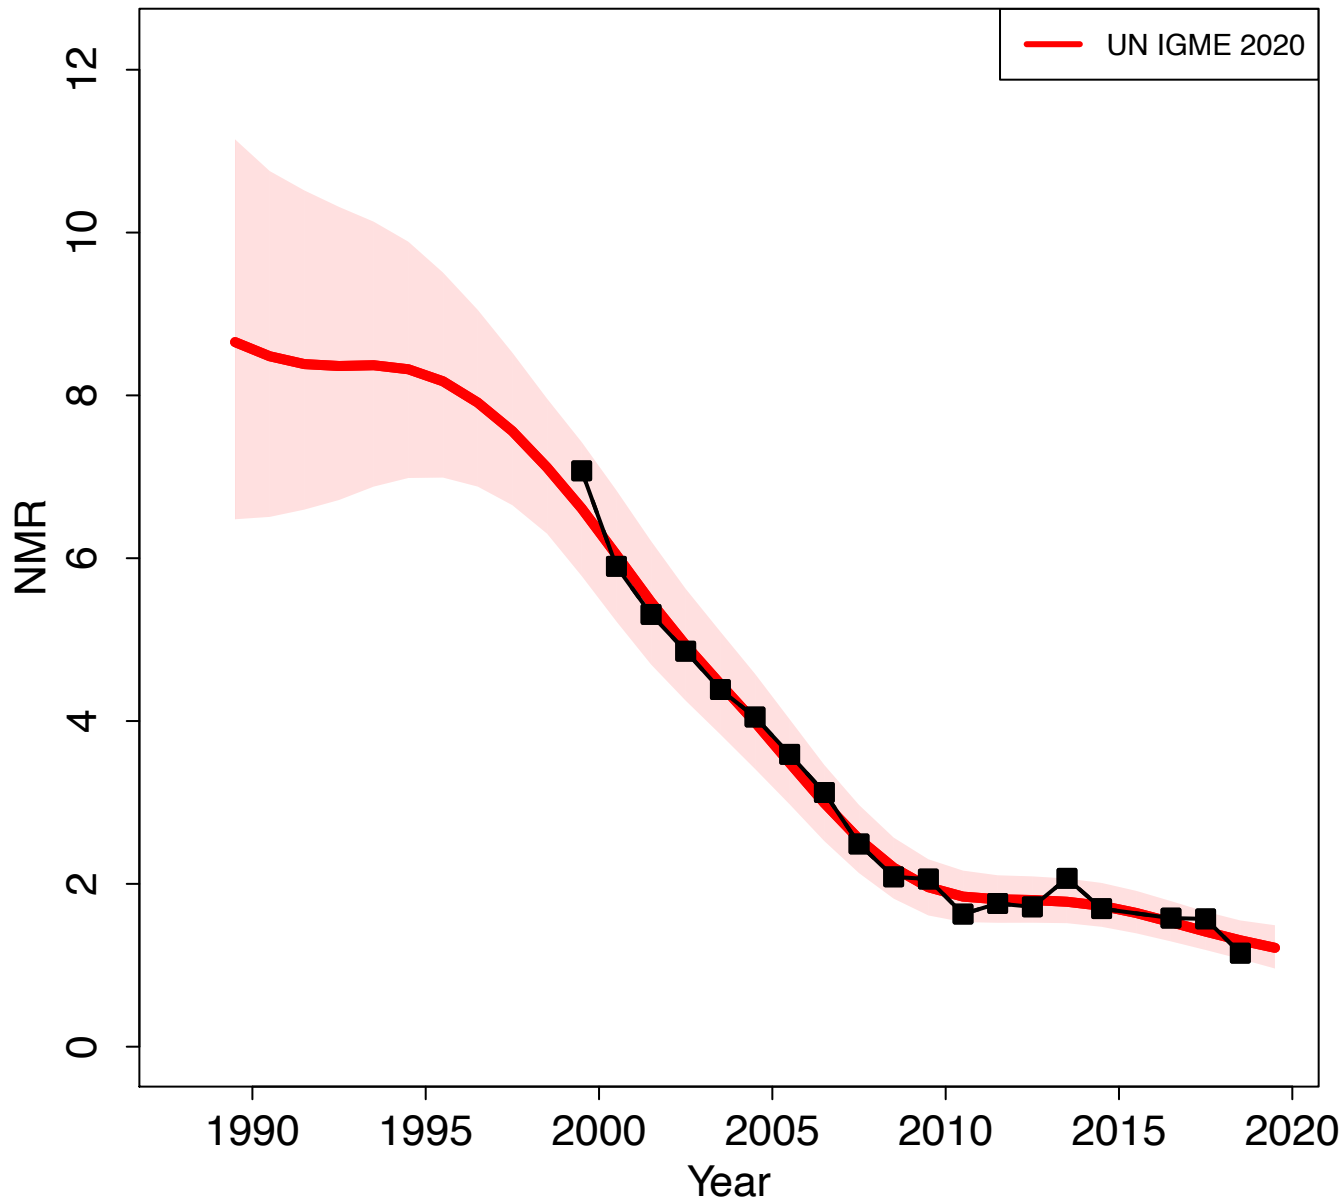

# Zoomed in

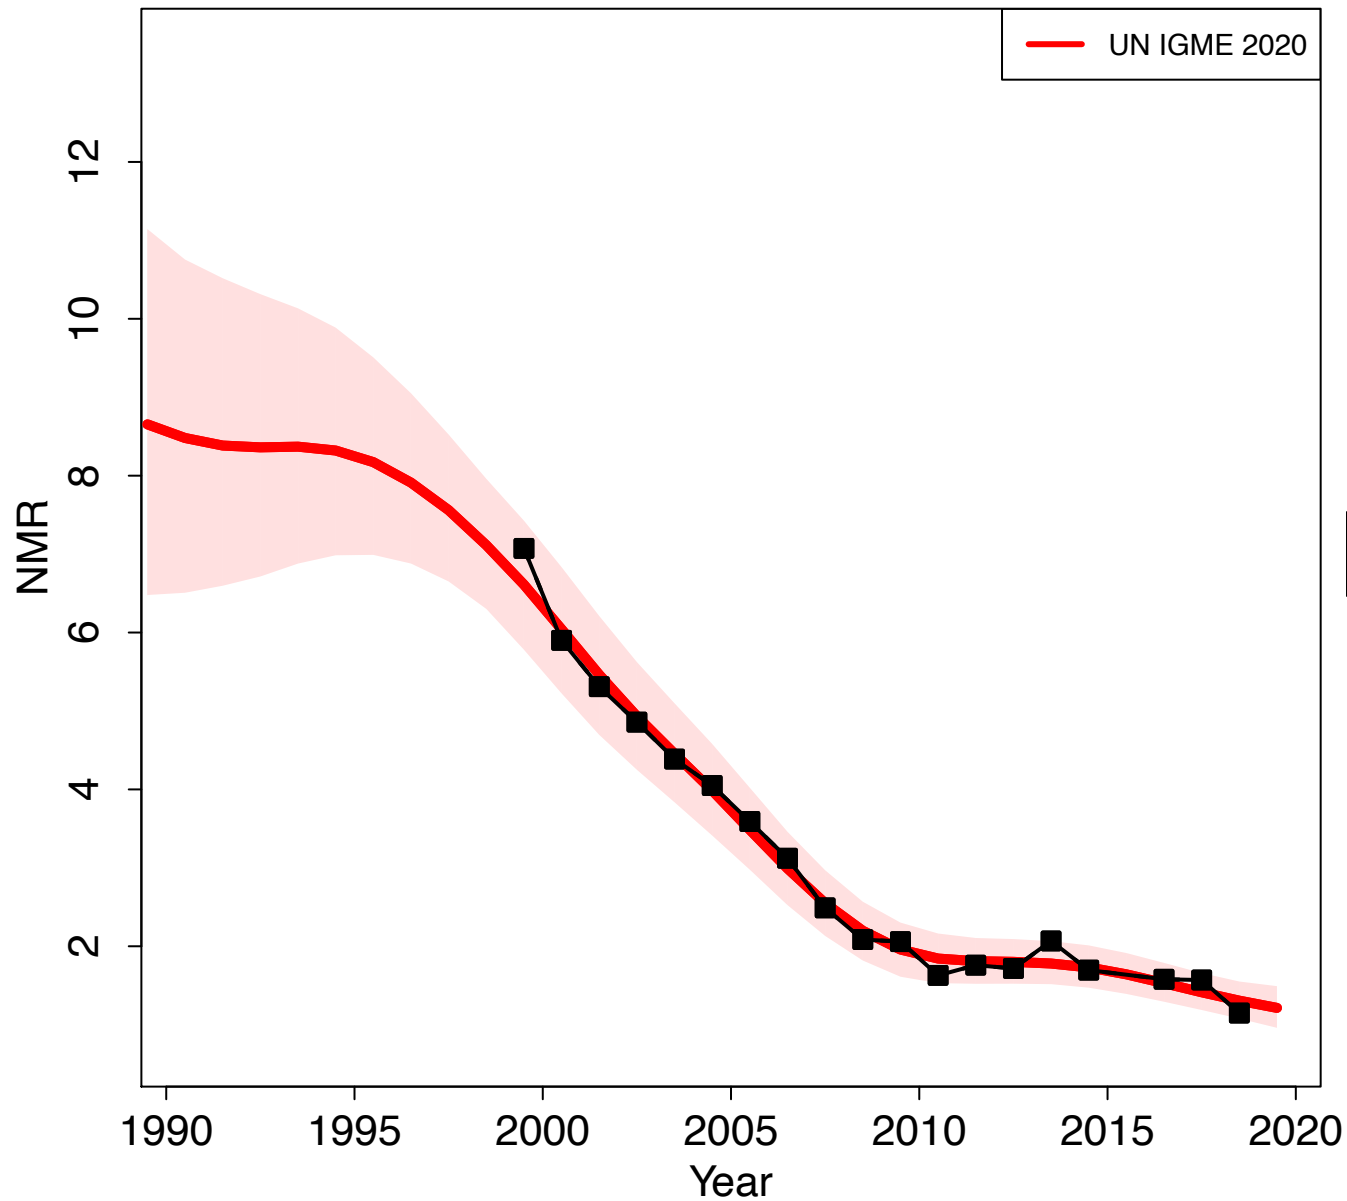

# Belgium

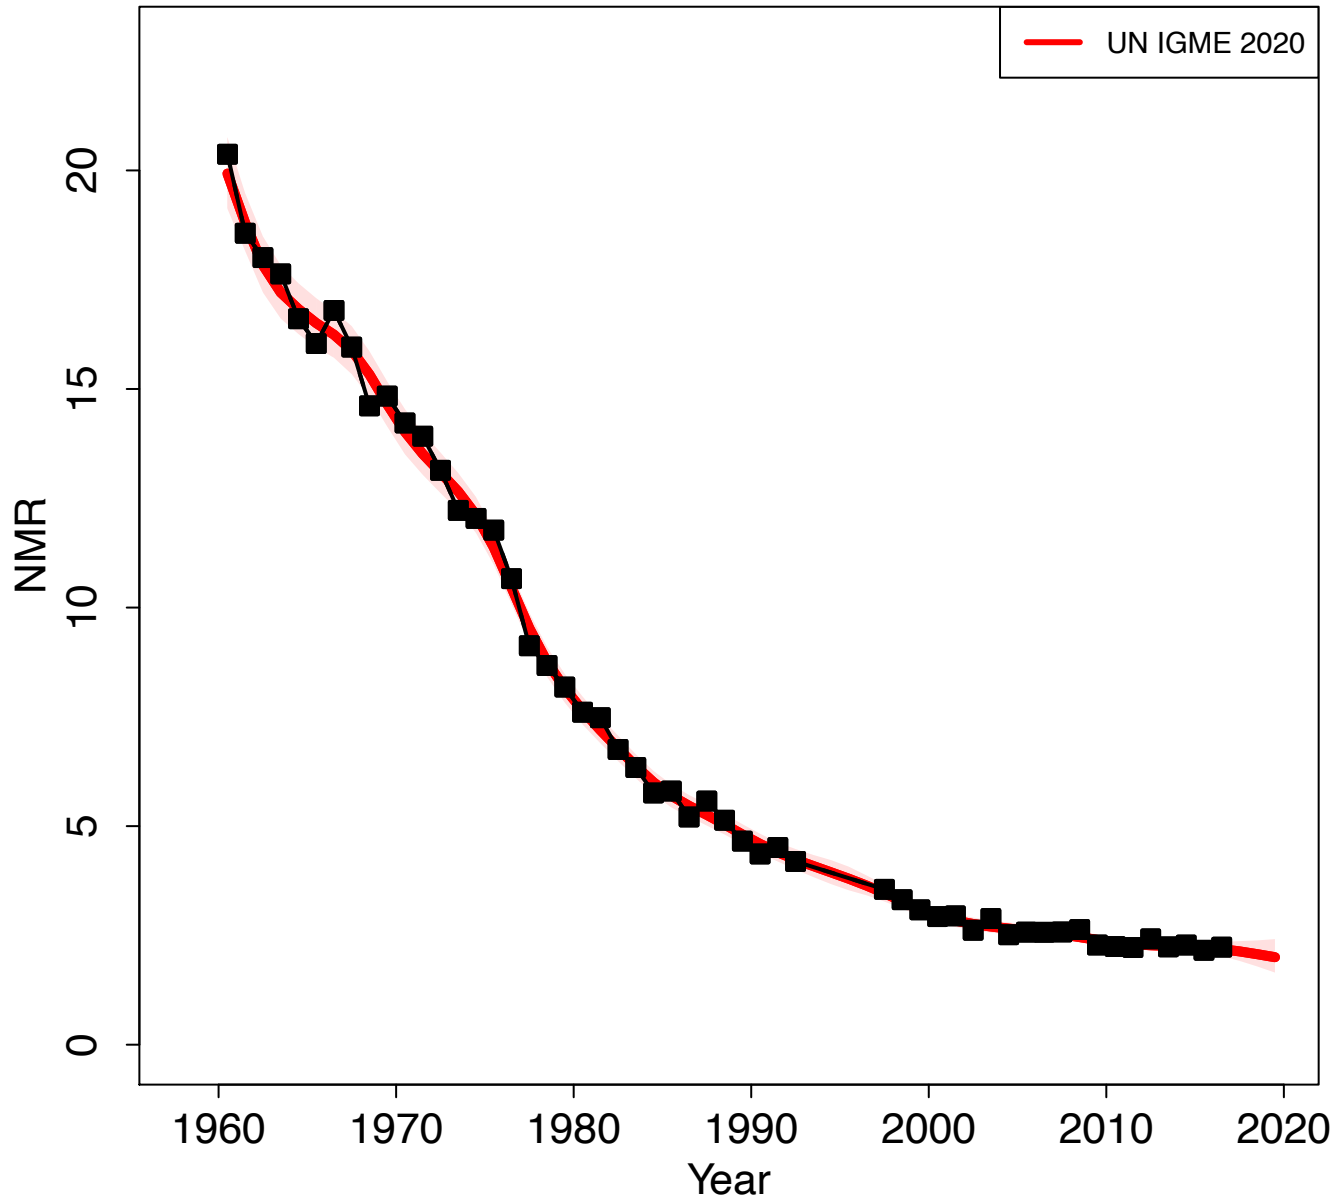

# Zoomed in

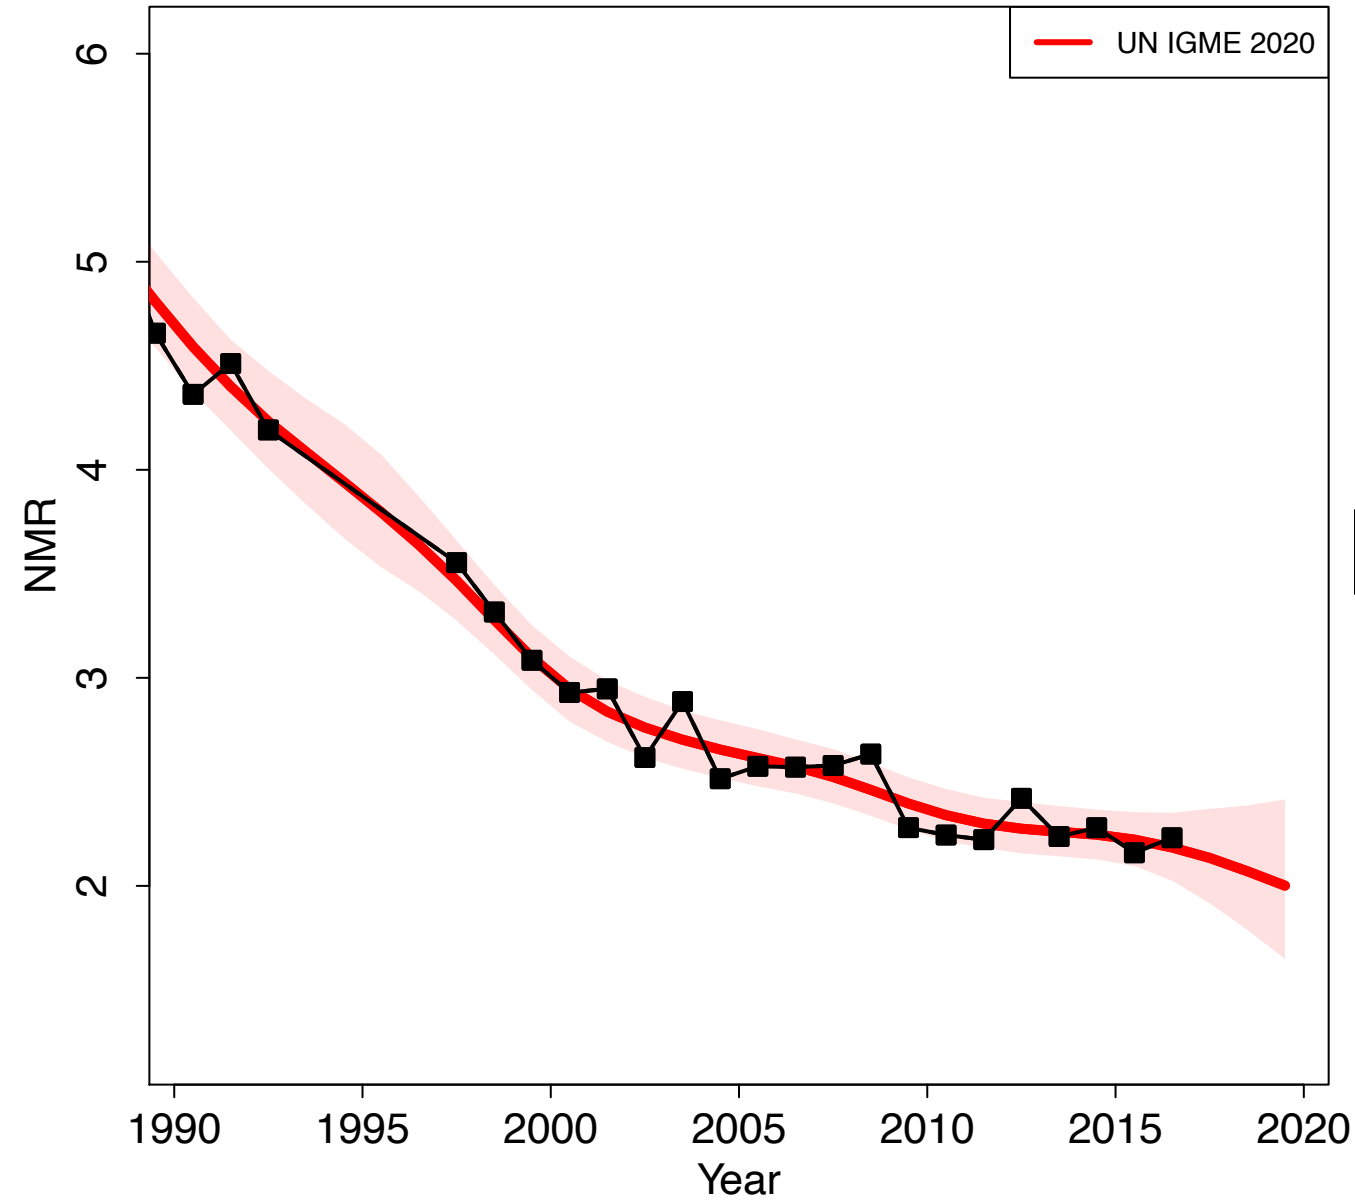

# Belize

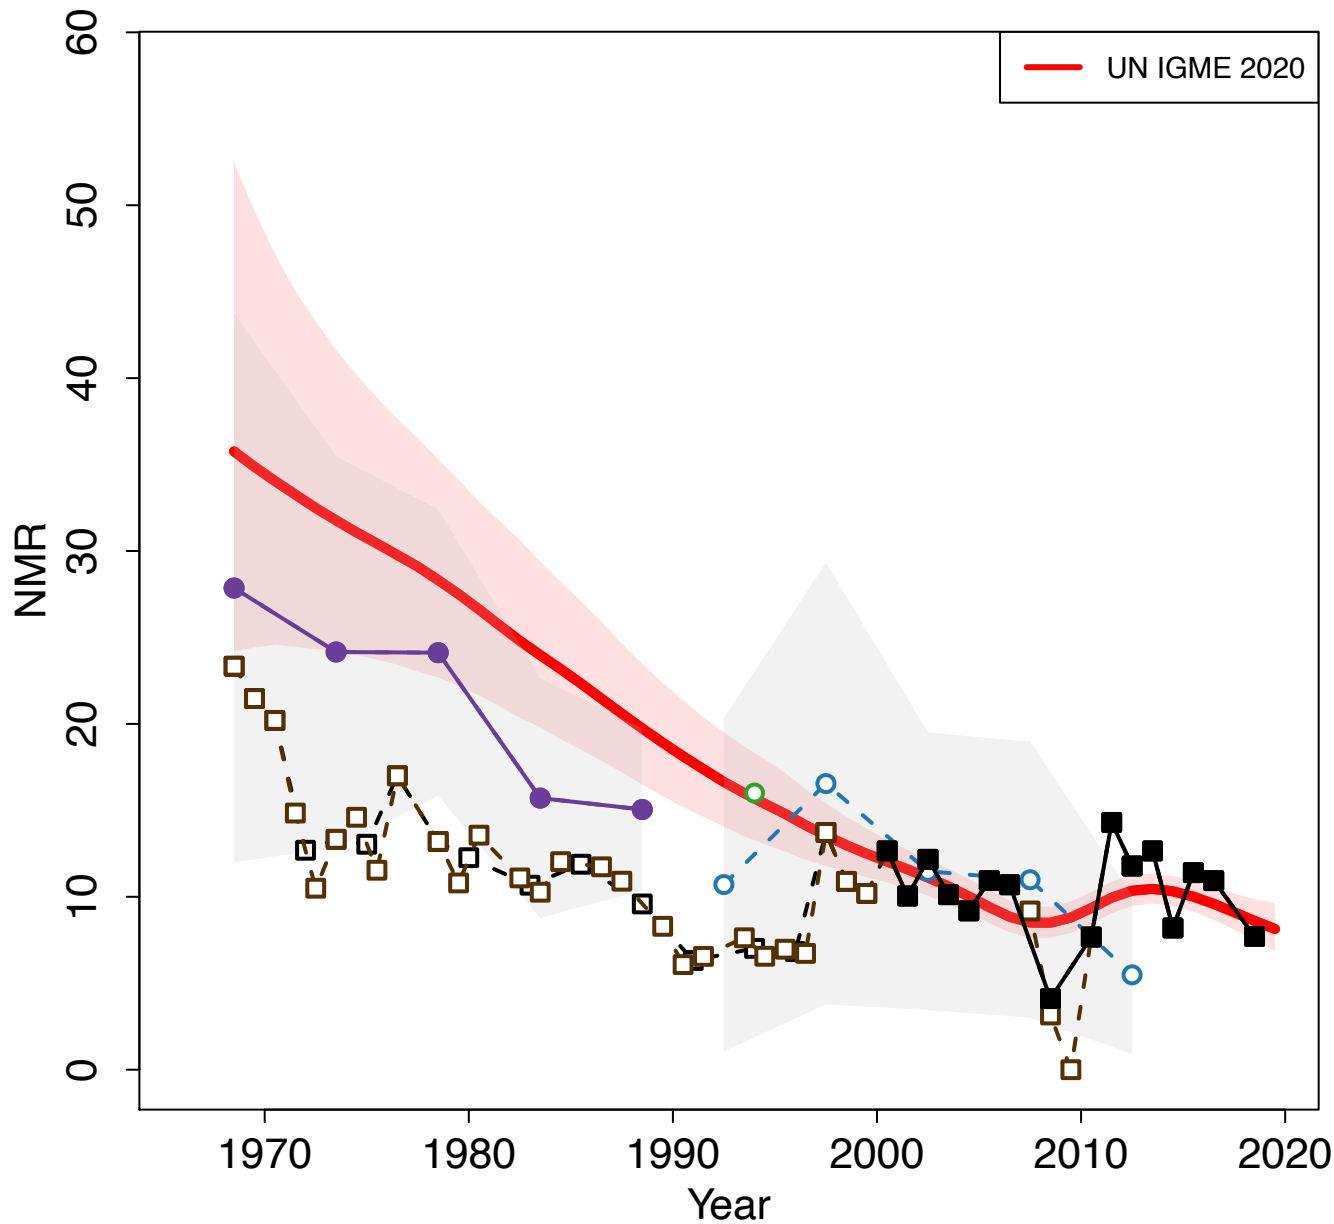

# Zoomed in

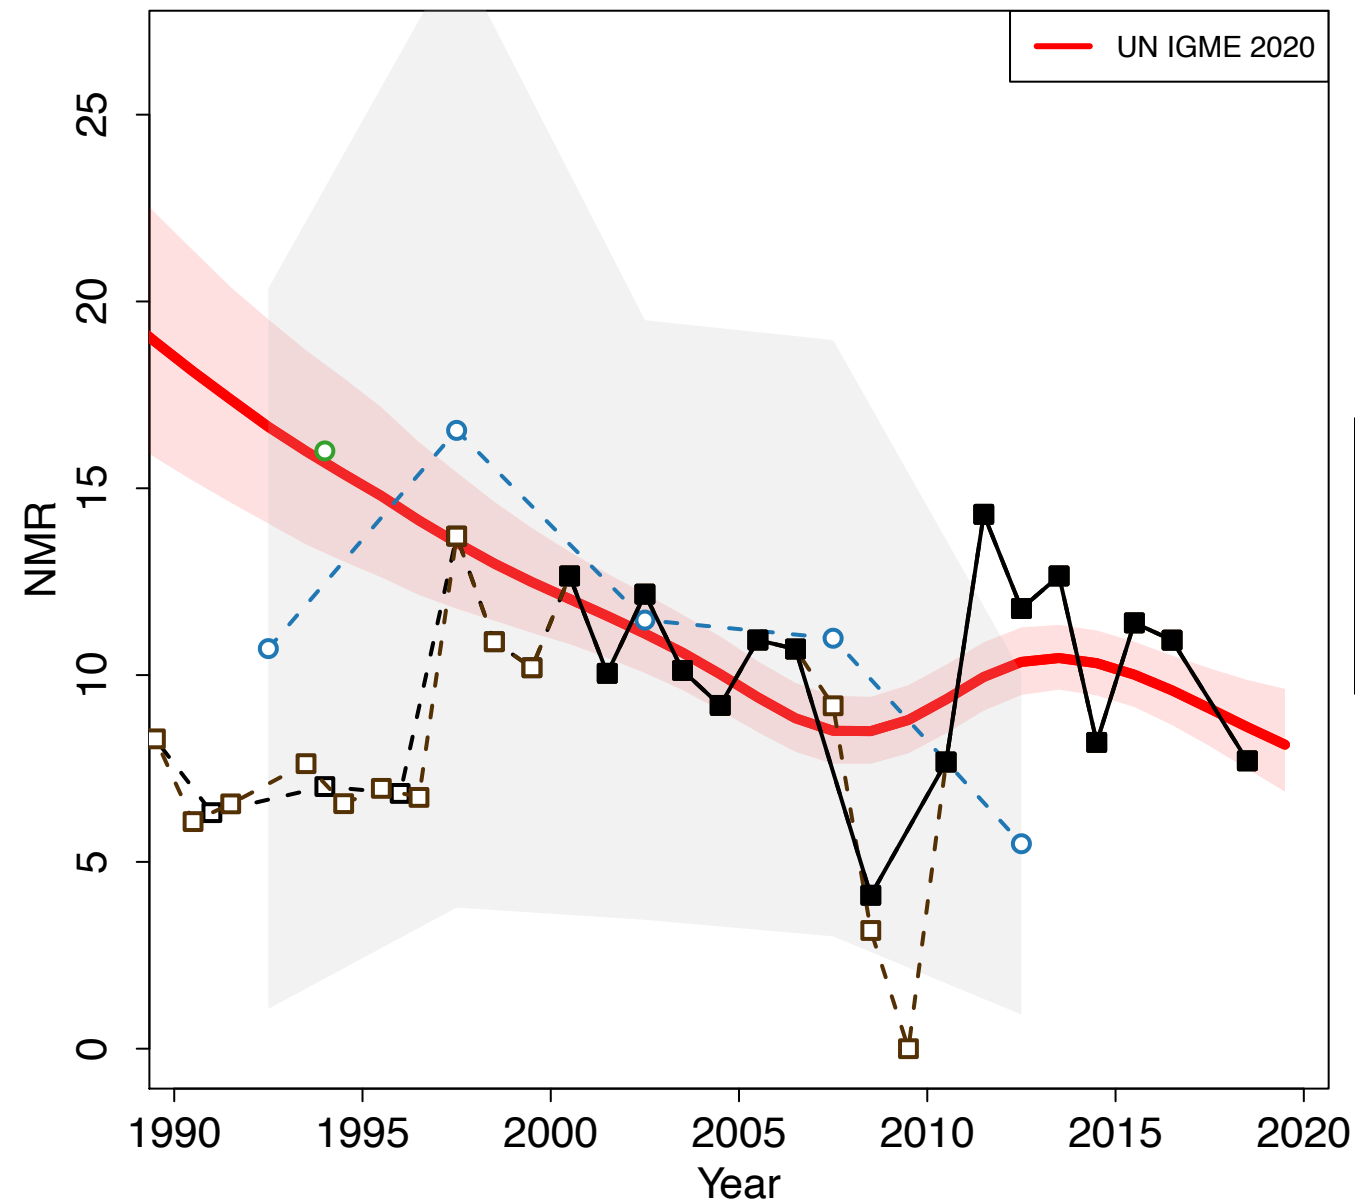

# Benin

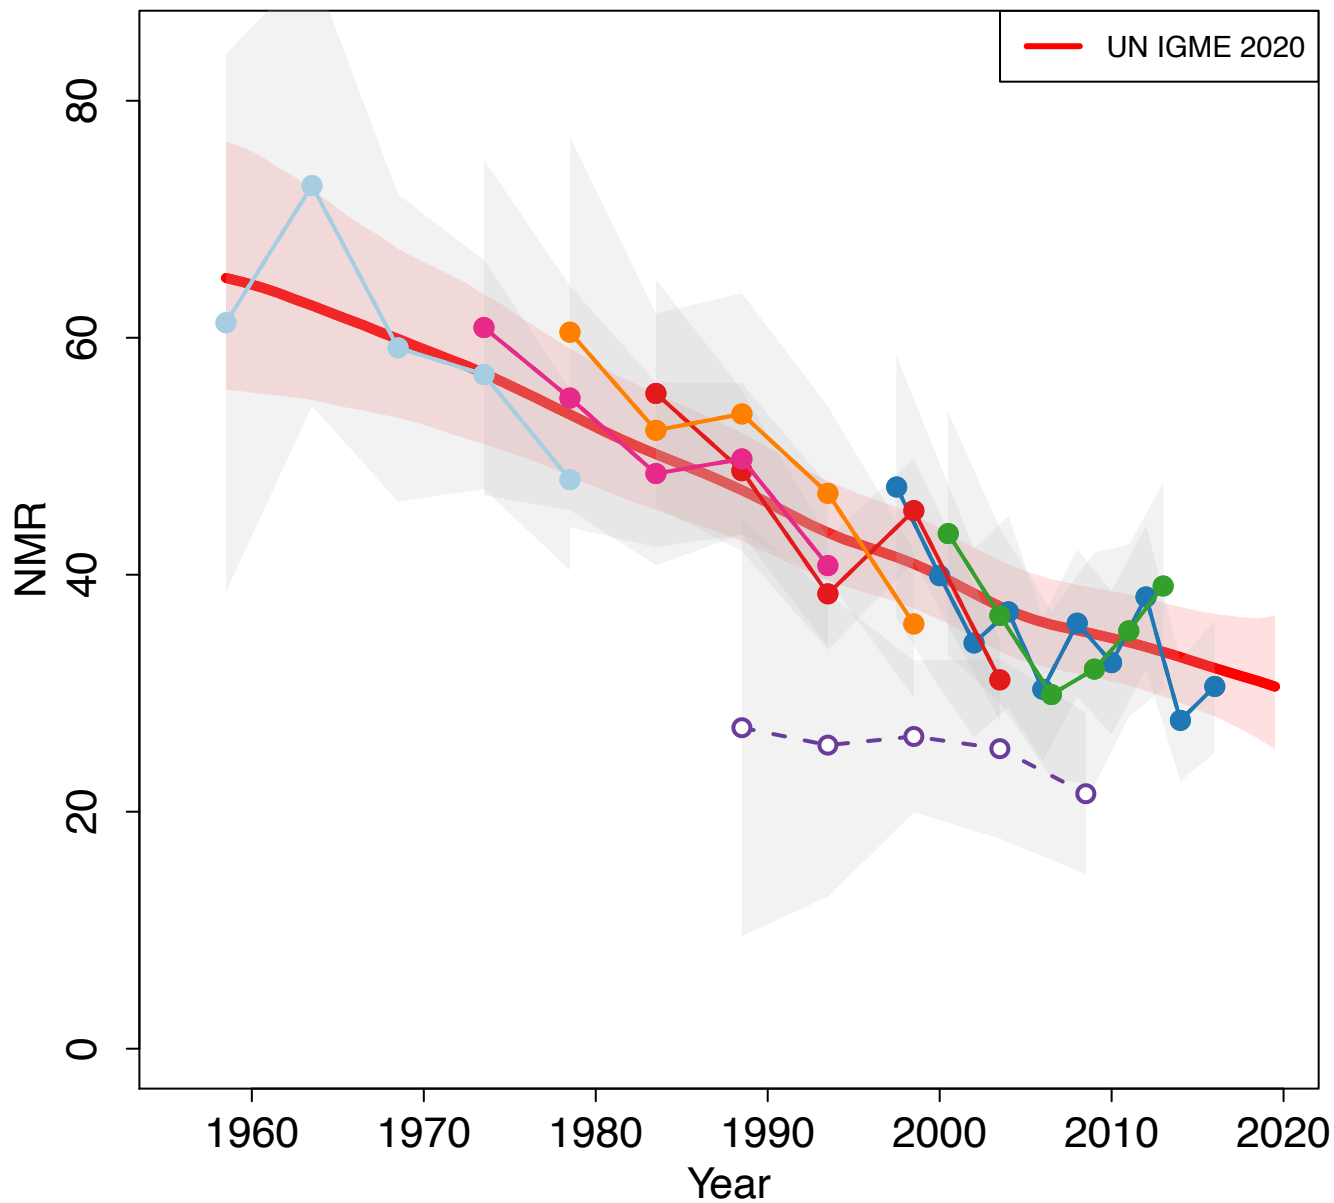

# Zoomed in

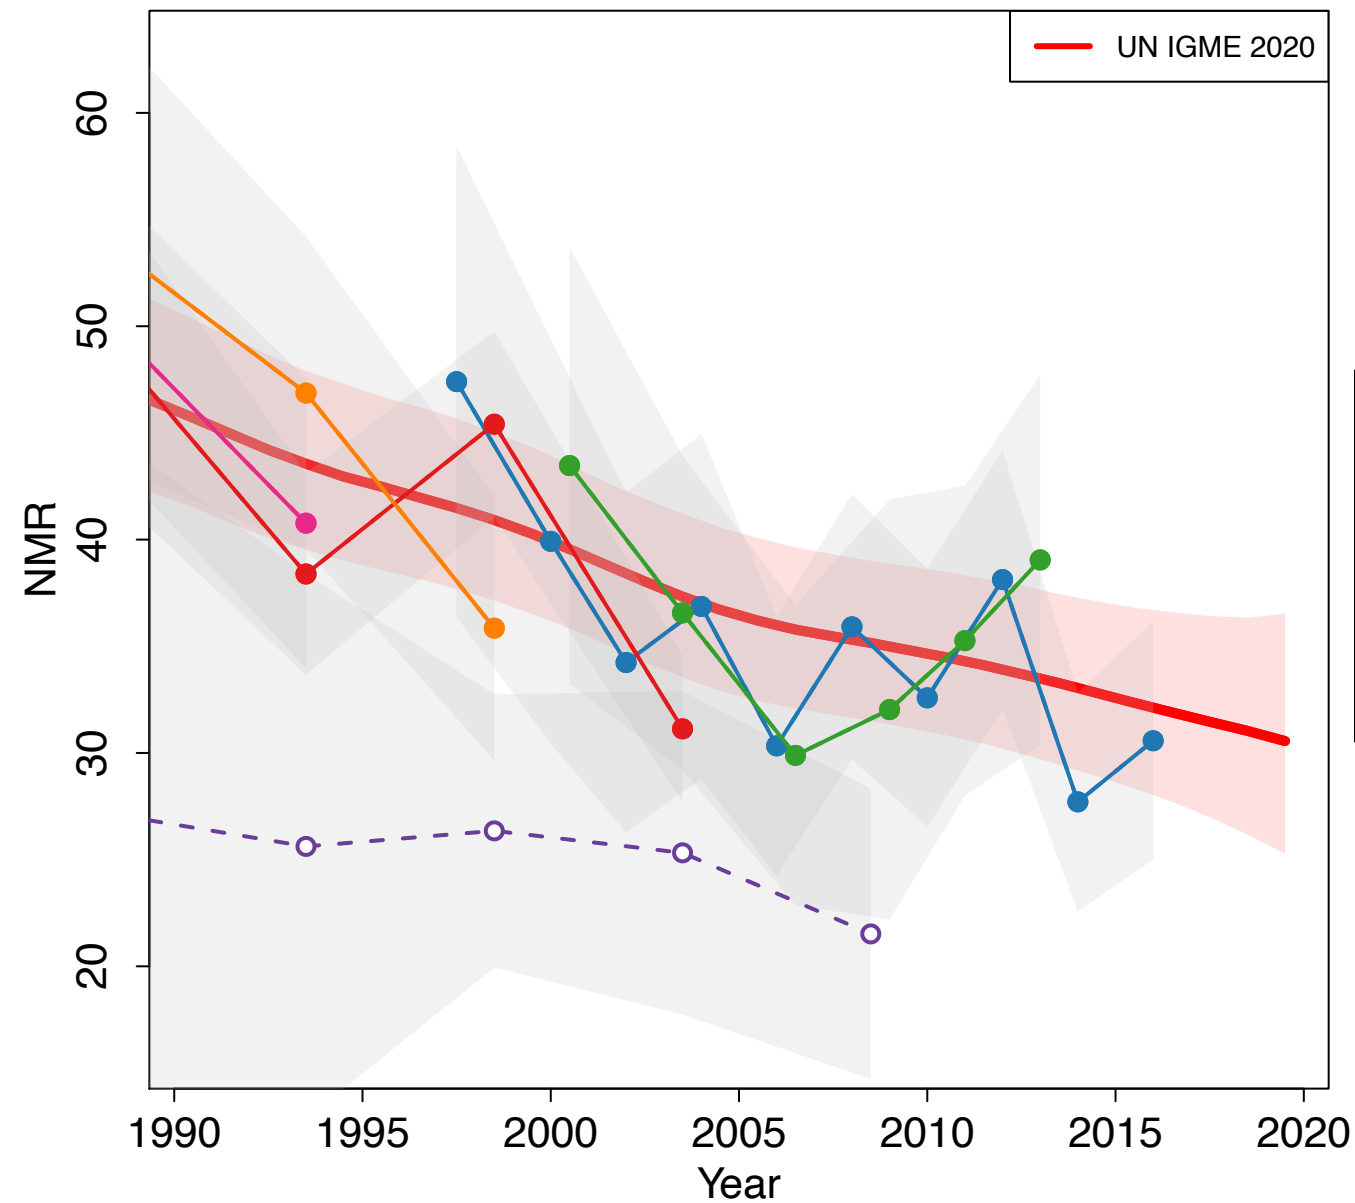



# Bhutan

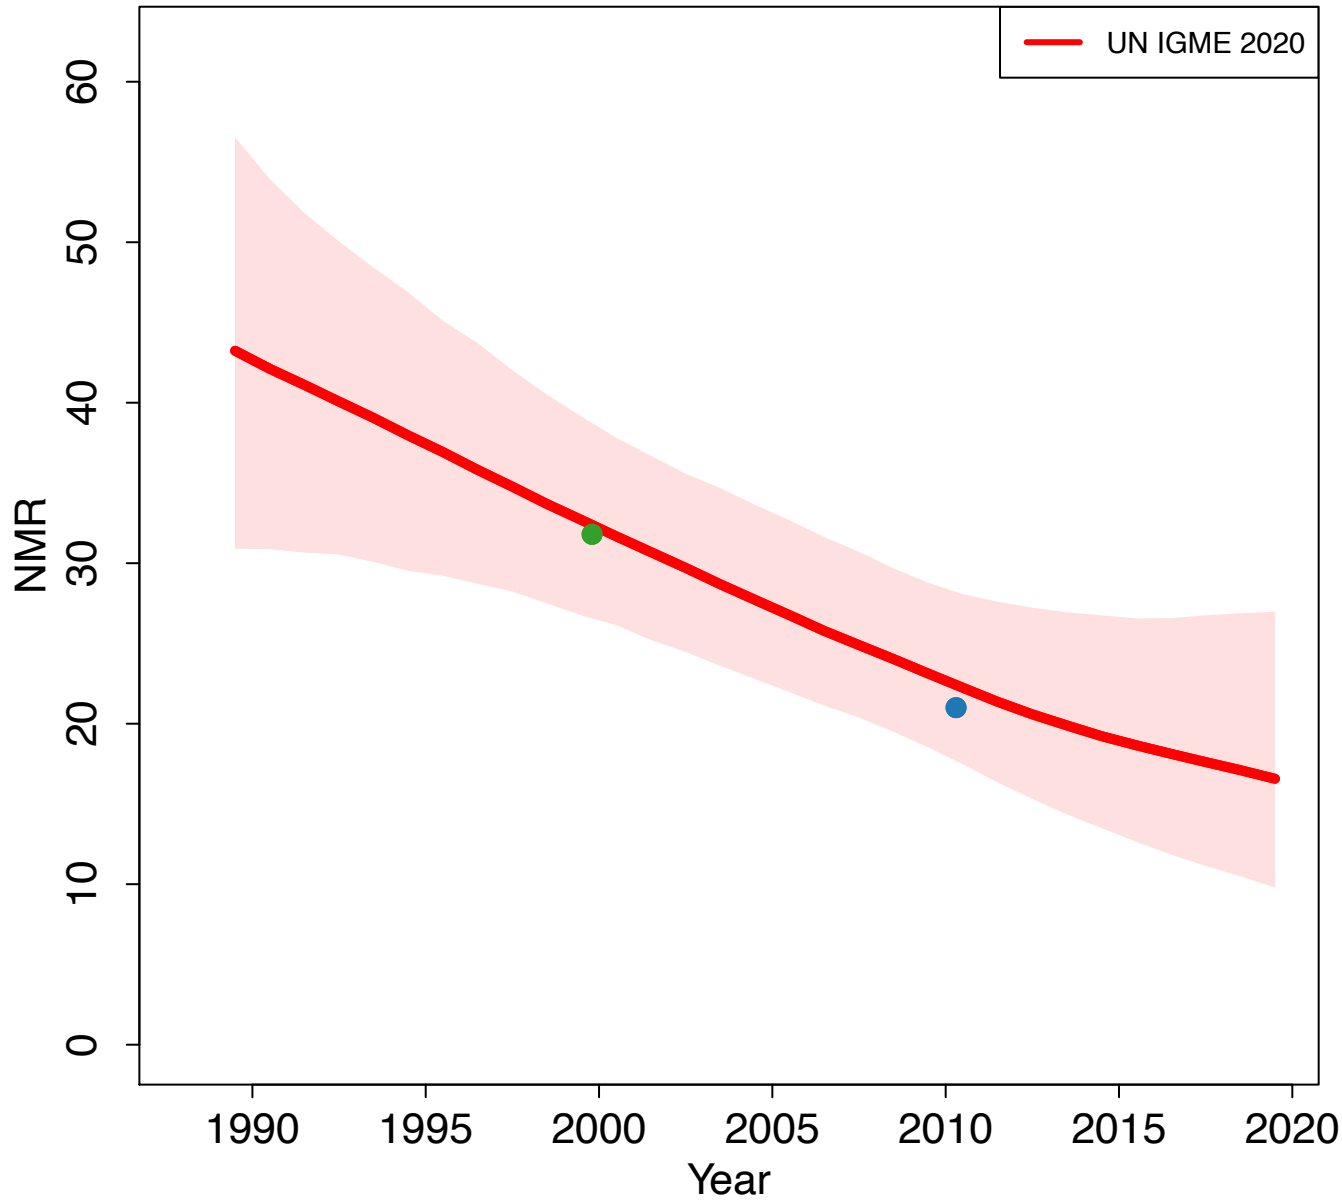

# Zoomed in

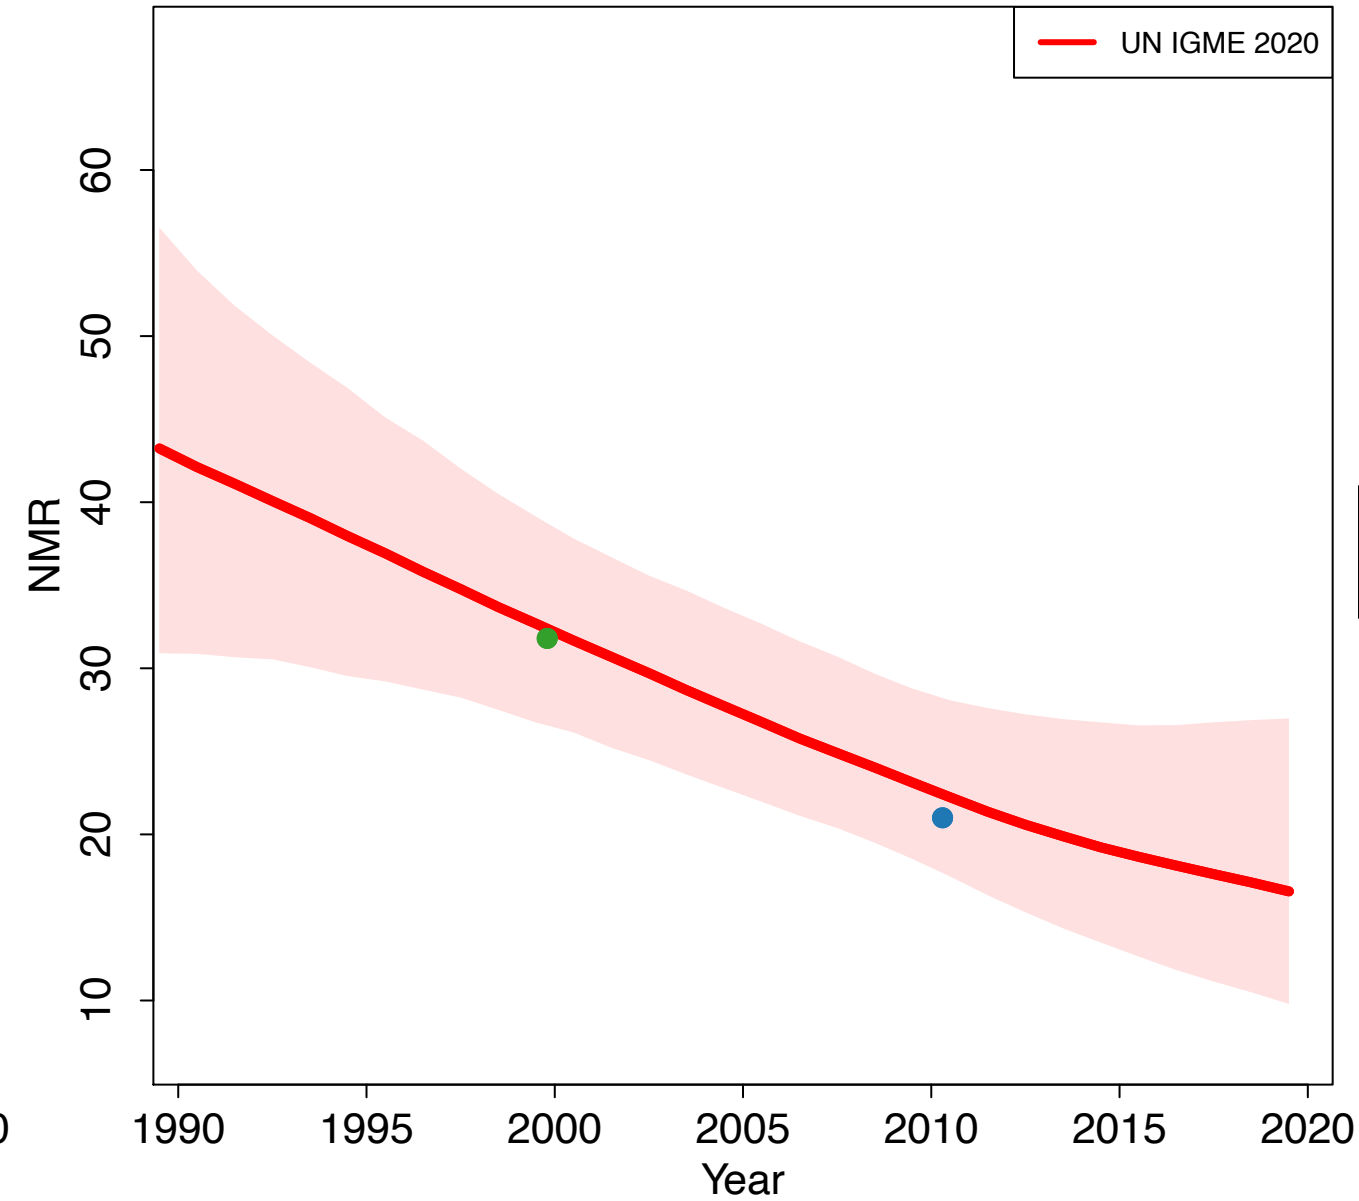

# Bolivia (Plurinational State of)

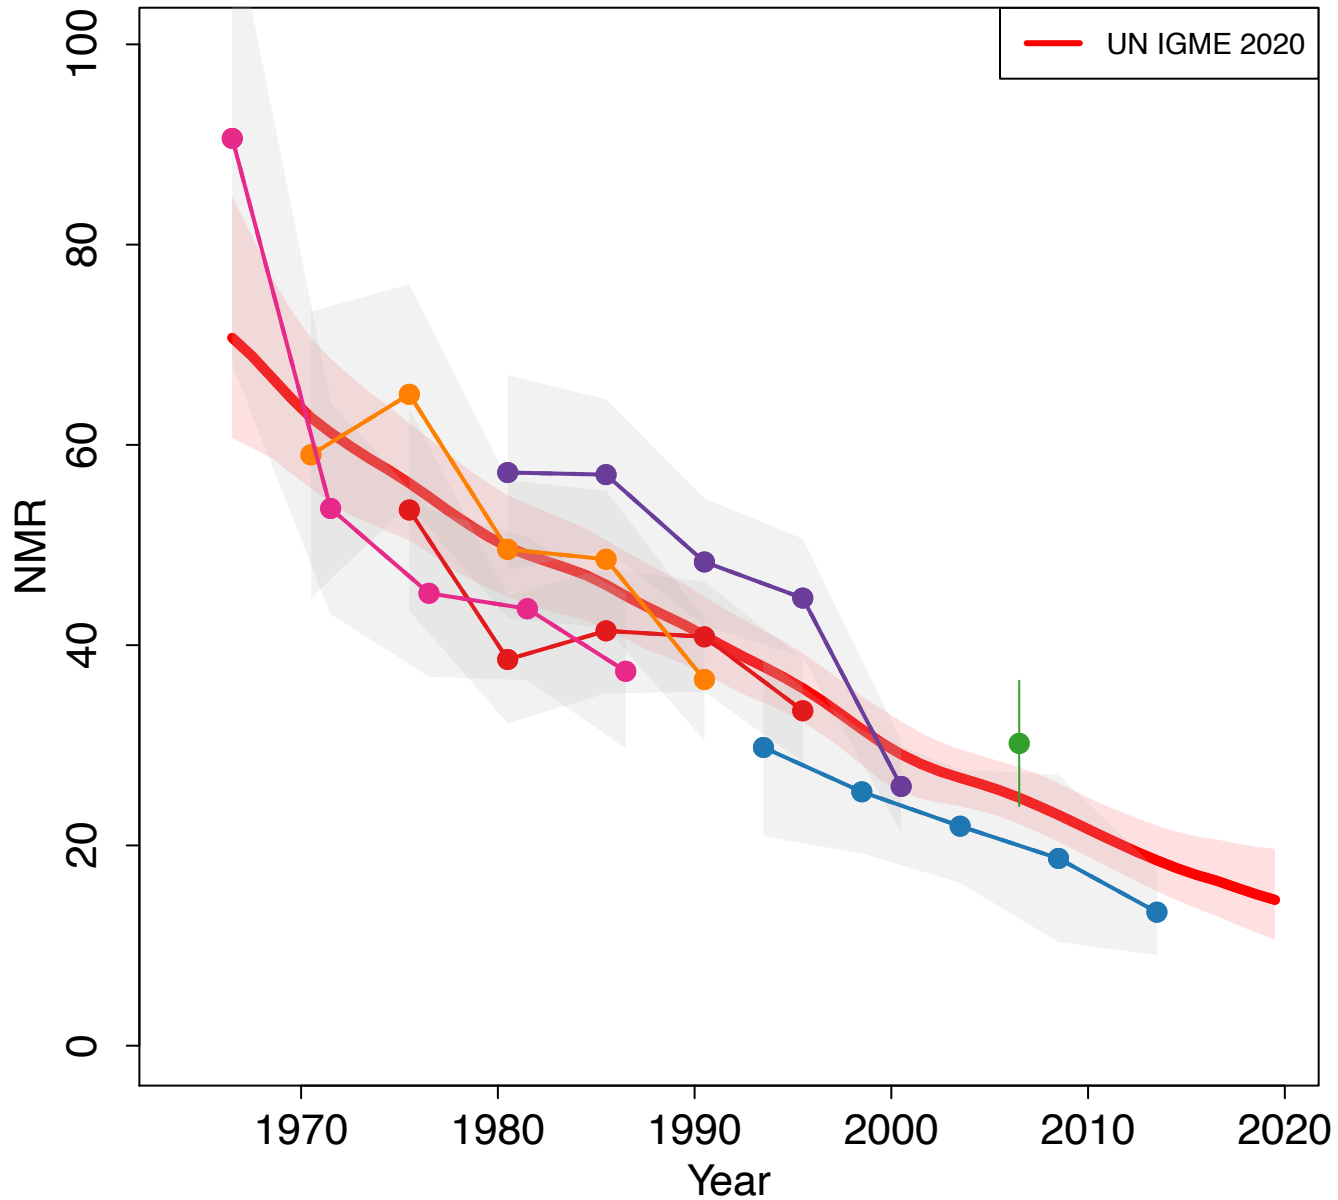

# Zoomed in

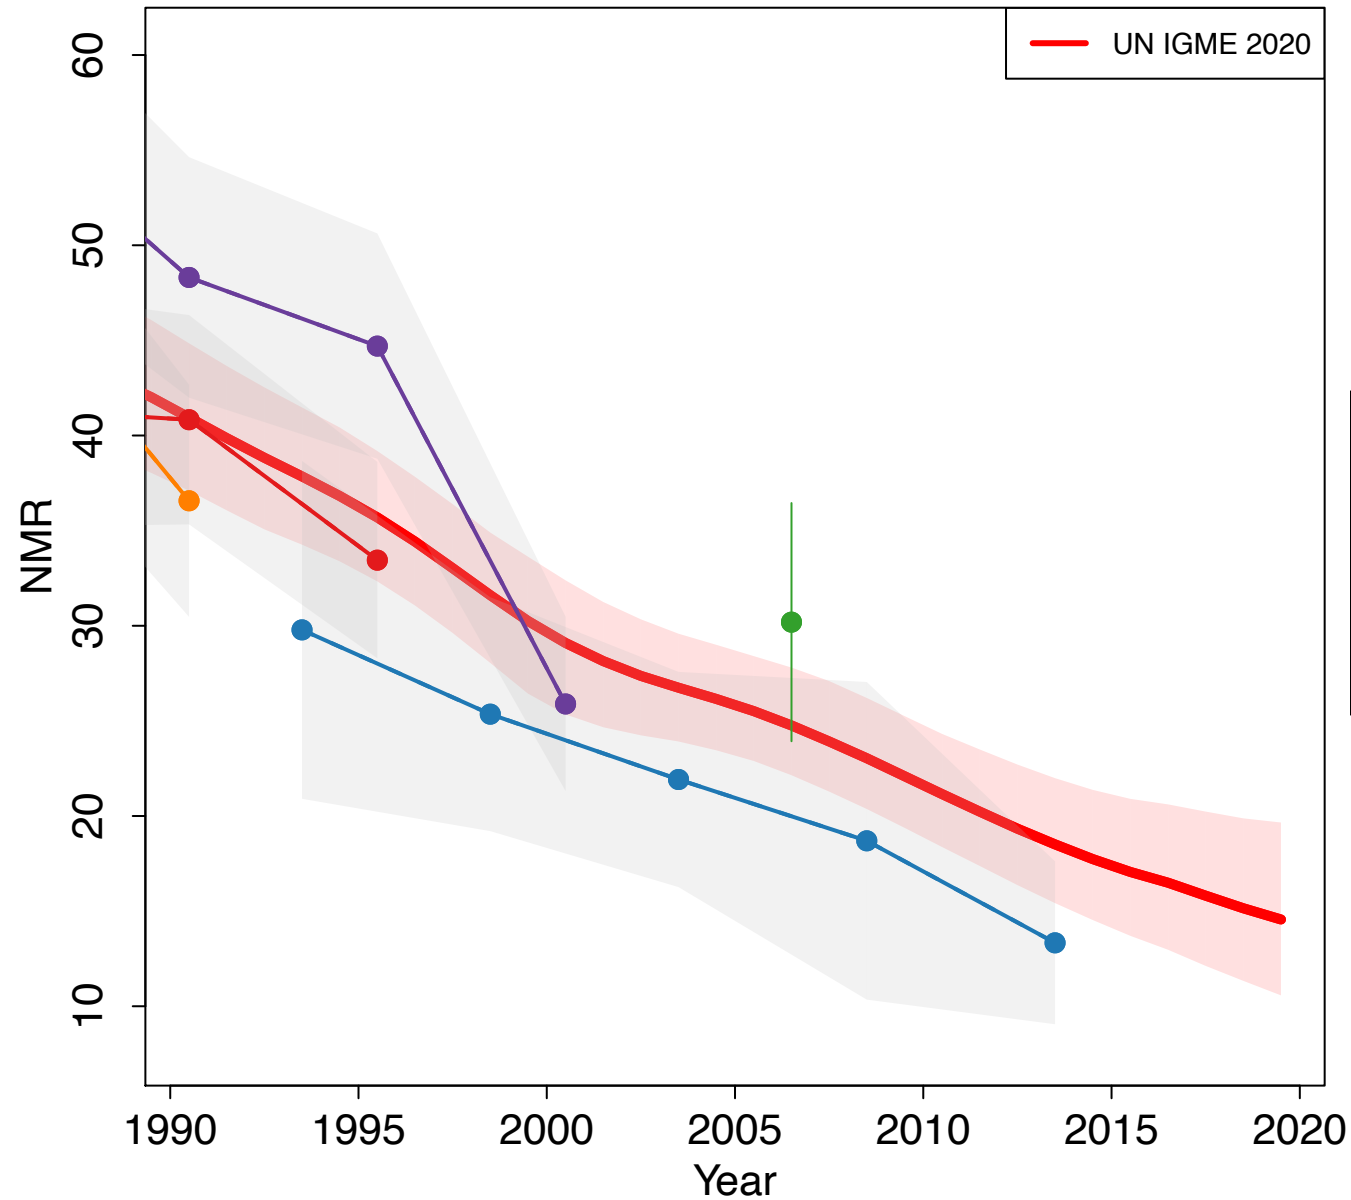

- Demographic and Health Survey 1989 (DHS)
- Demographic and Health Survey 1994 (DHS)
- Demographic and Health Survey 1998 (DHS)
- Demographic and Health Survey 2003 (DHS)
- Demographic and Health Survey 2008 (DHS)
- Demographic and Health Survey 2016 (Other DHS)

# Bosnia and Herzegovina

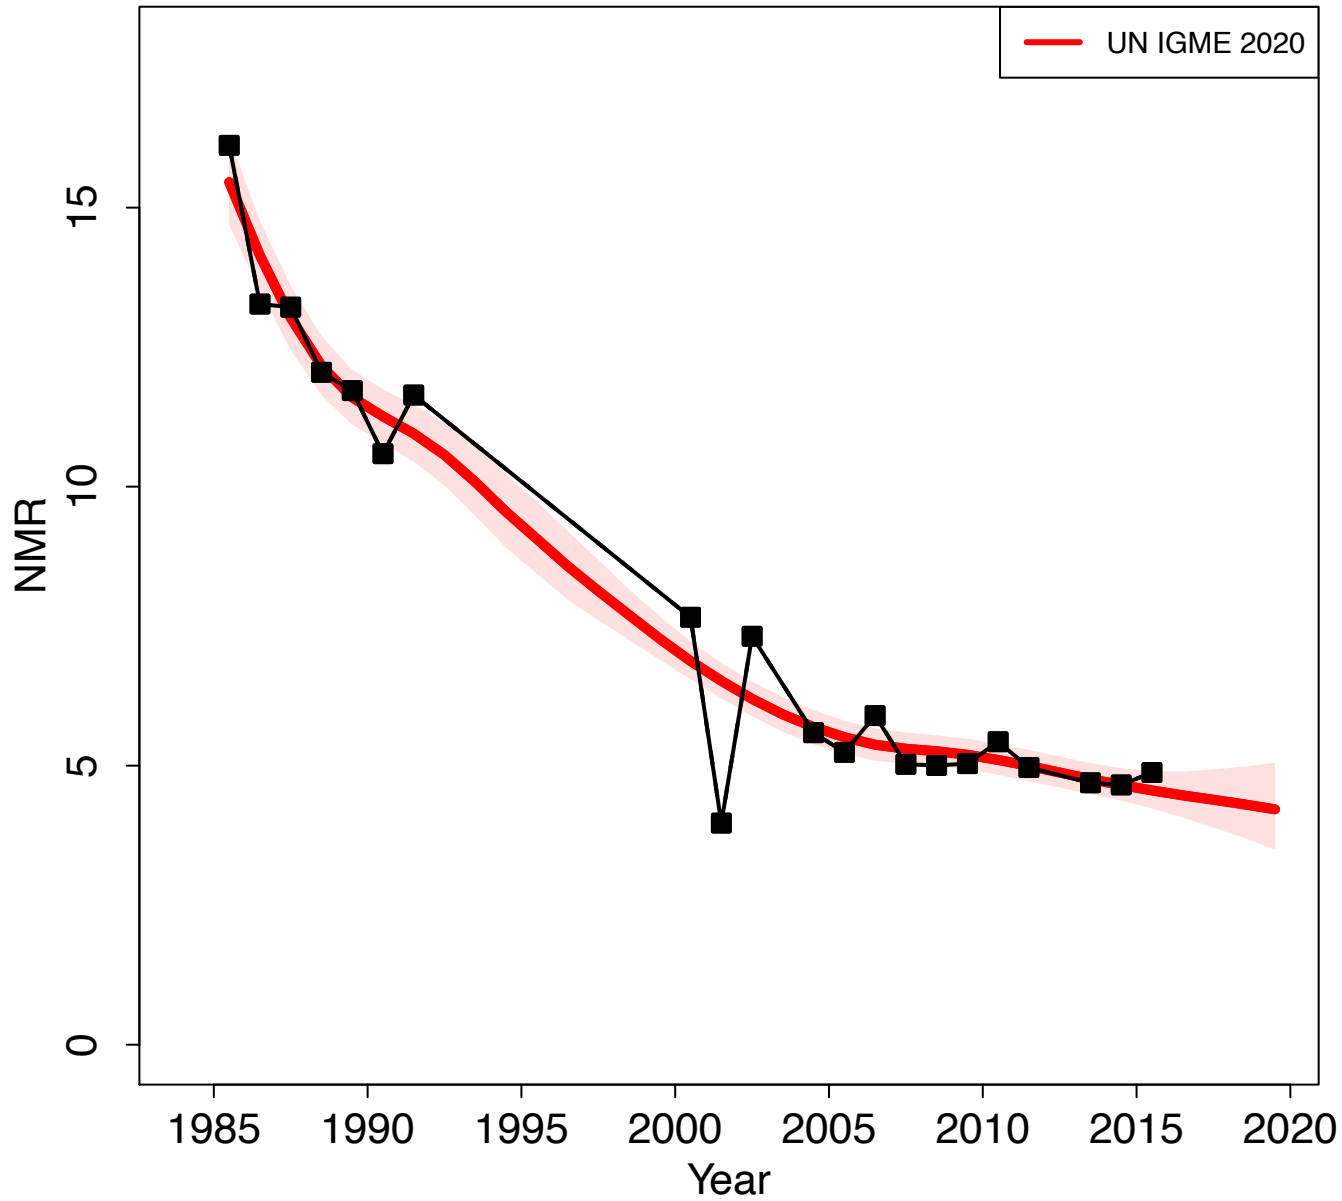

# Zoomed in

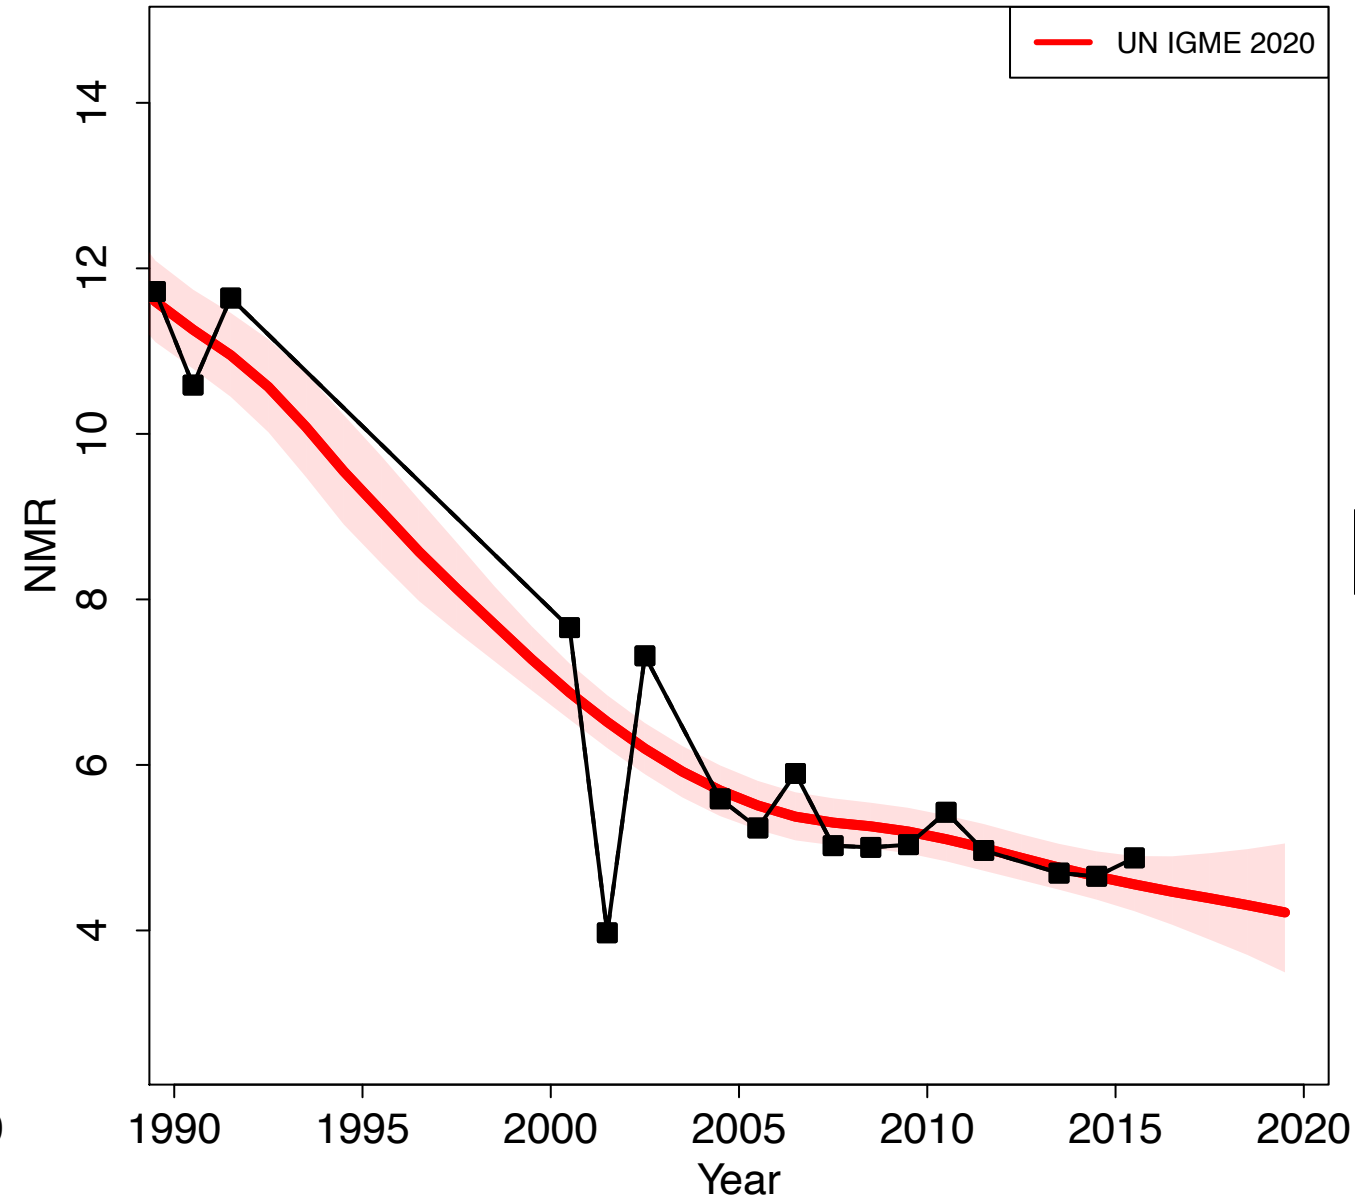

# Botswana

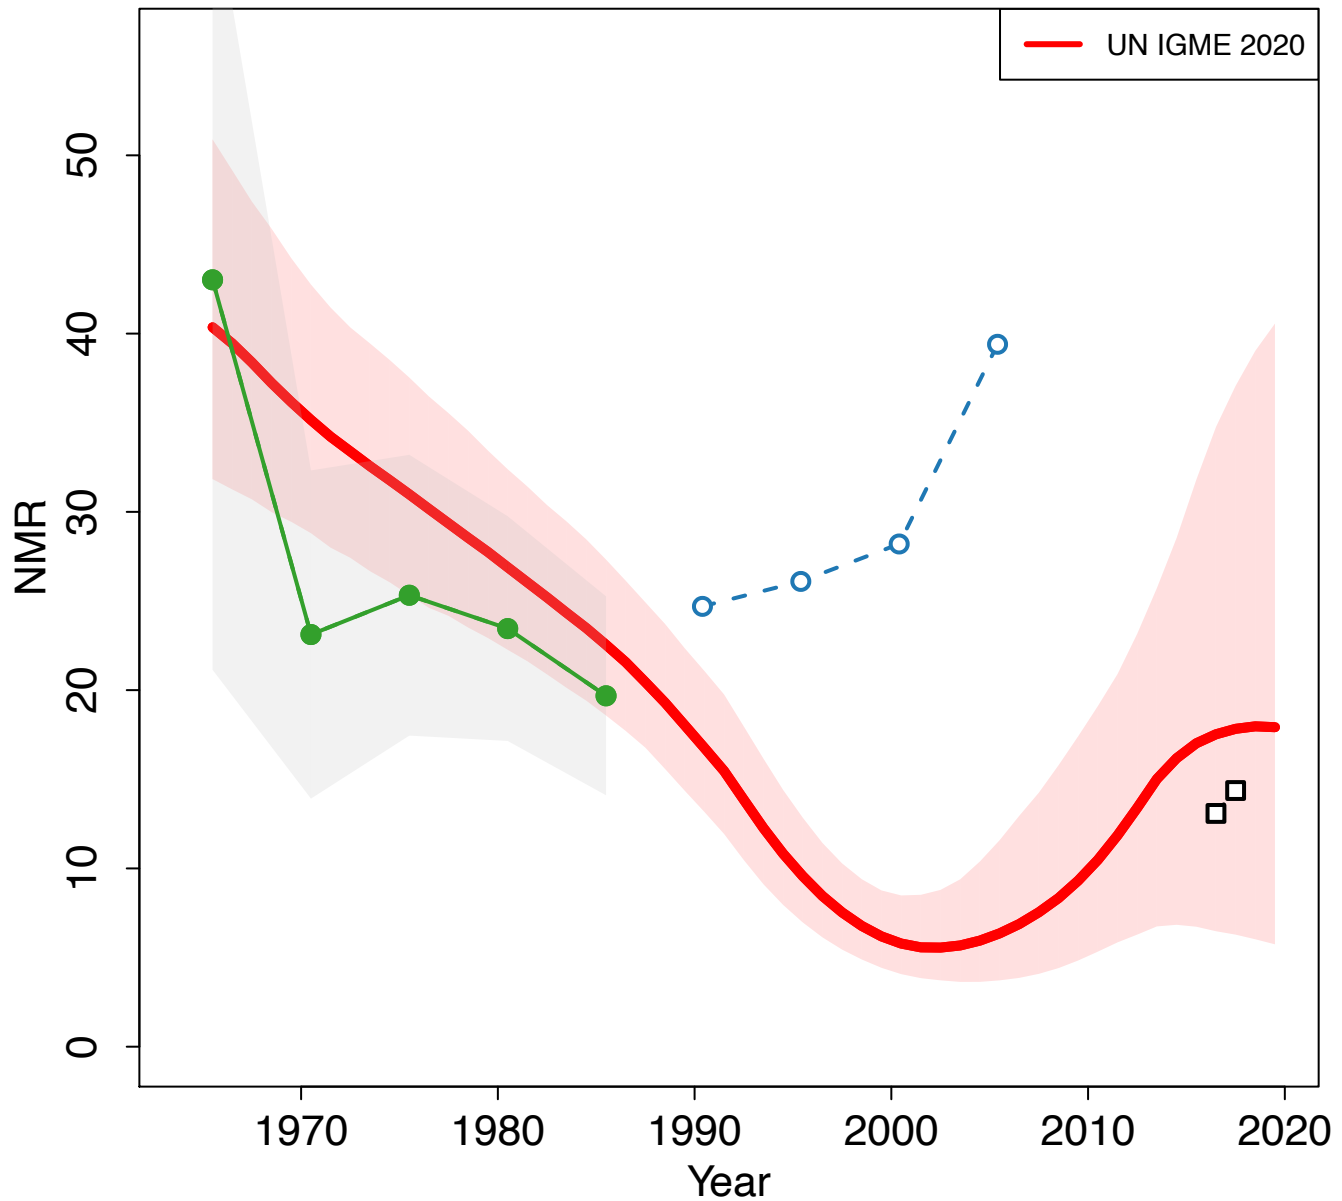

# Zoomed in

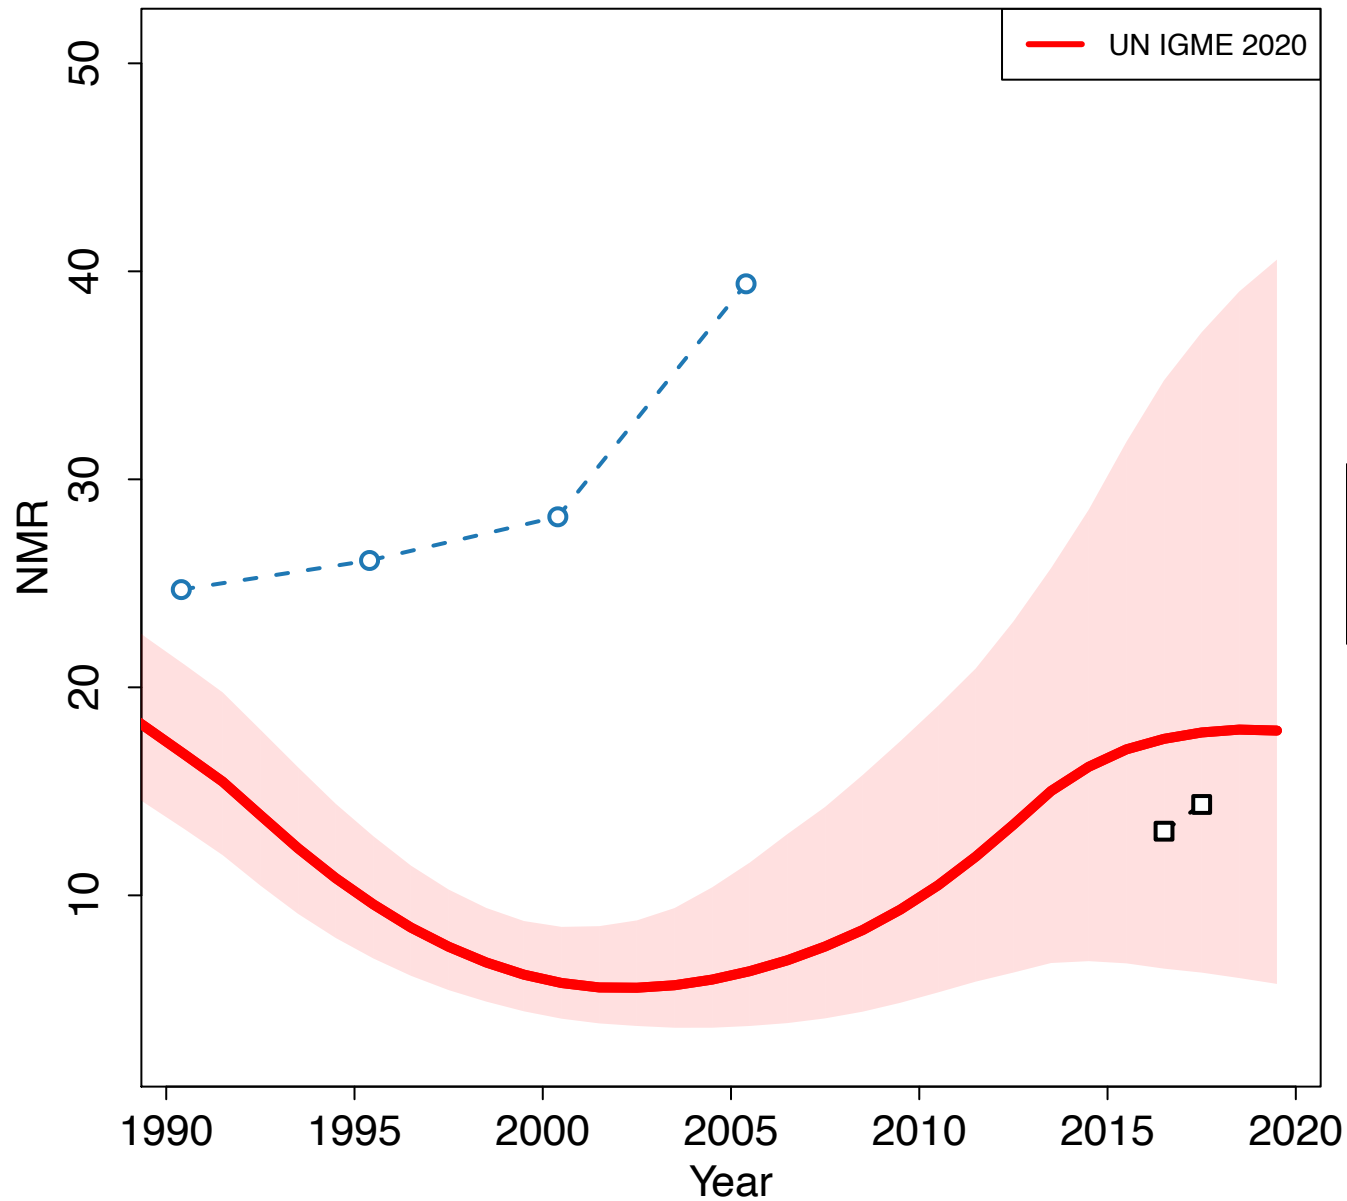

# Brazil

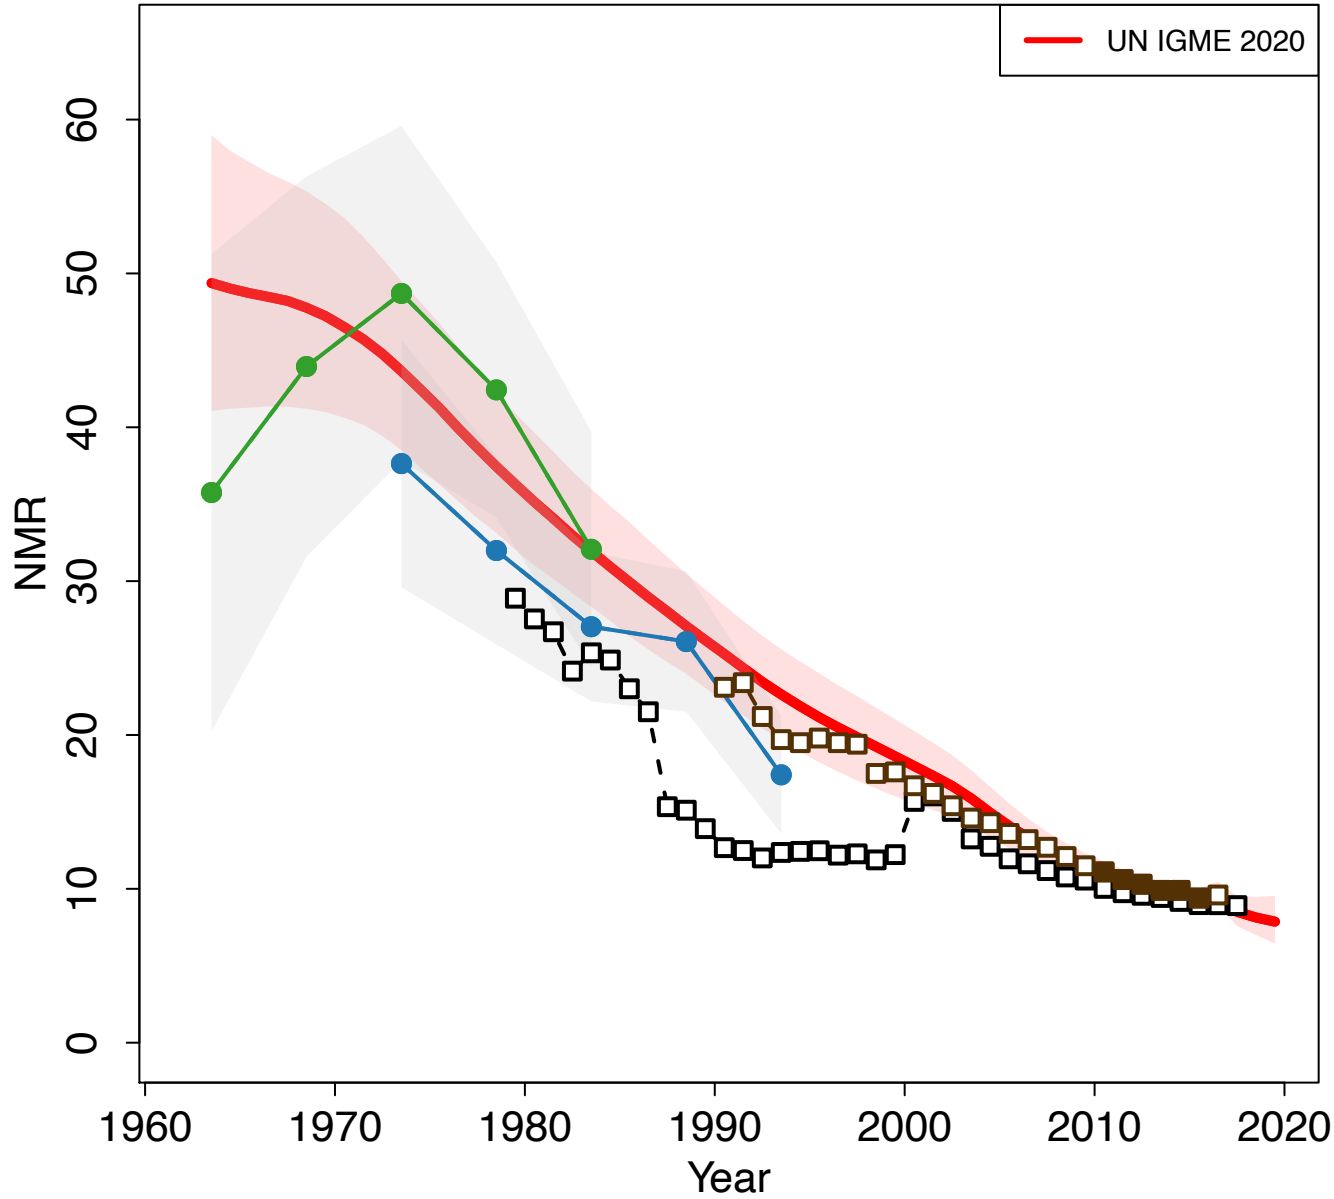

# Zoomed in

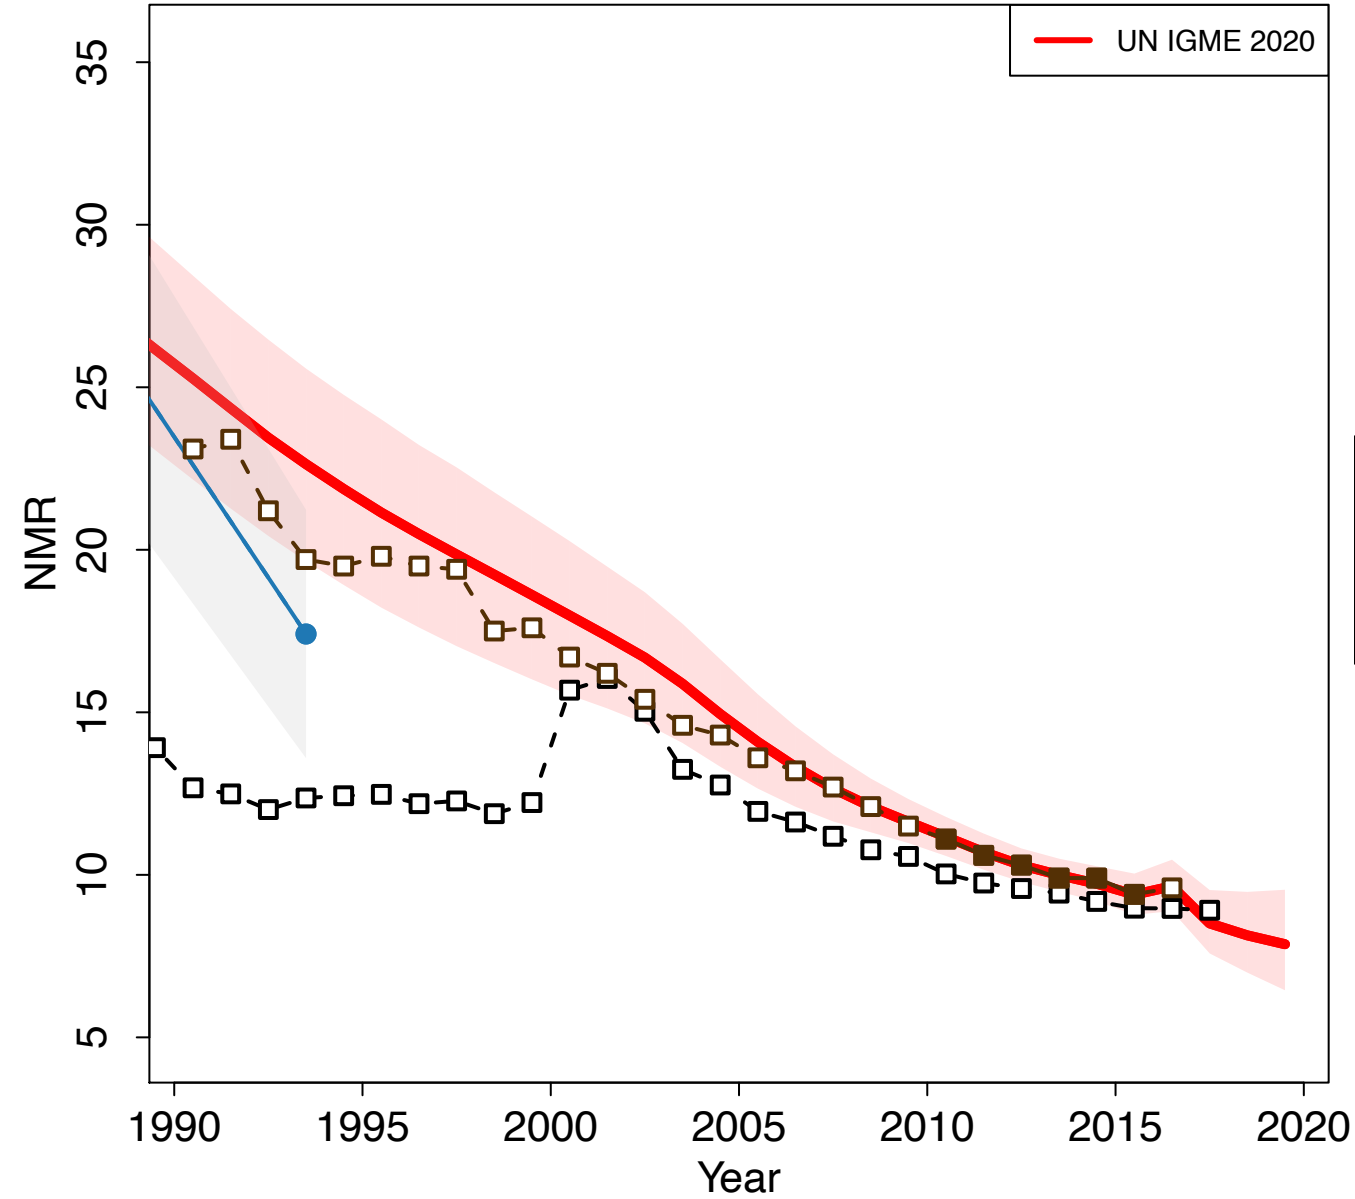

- Demographic and Health Survey 1986 (DHS)
- Demographic and Health Survey 1996 (DHS)
- VR Data from Information System of Ministry of Health (Busca Ativa)
- VR WHO

# Brunei Darussalam

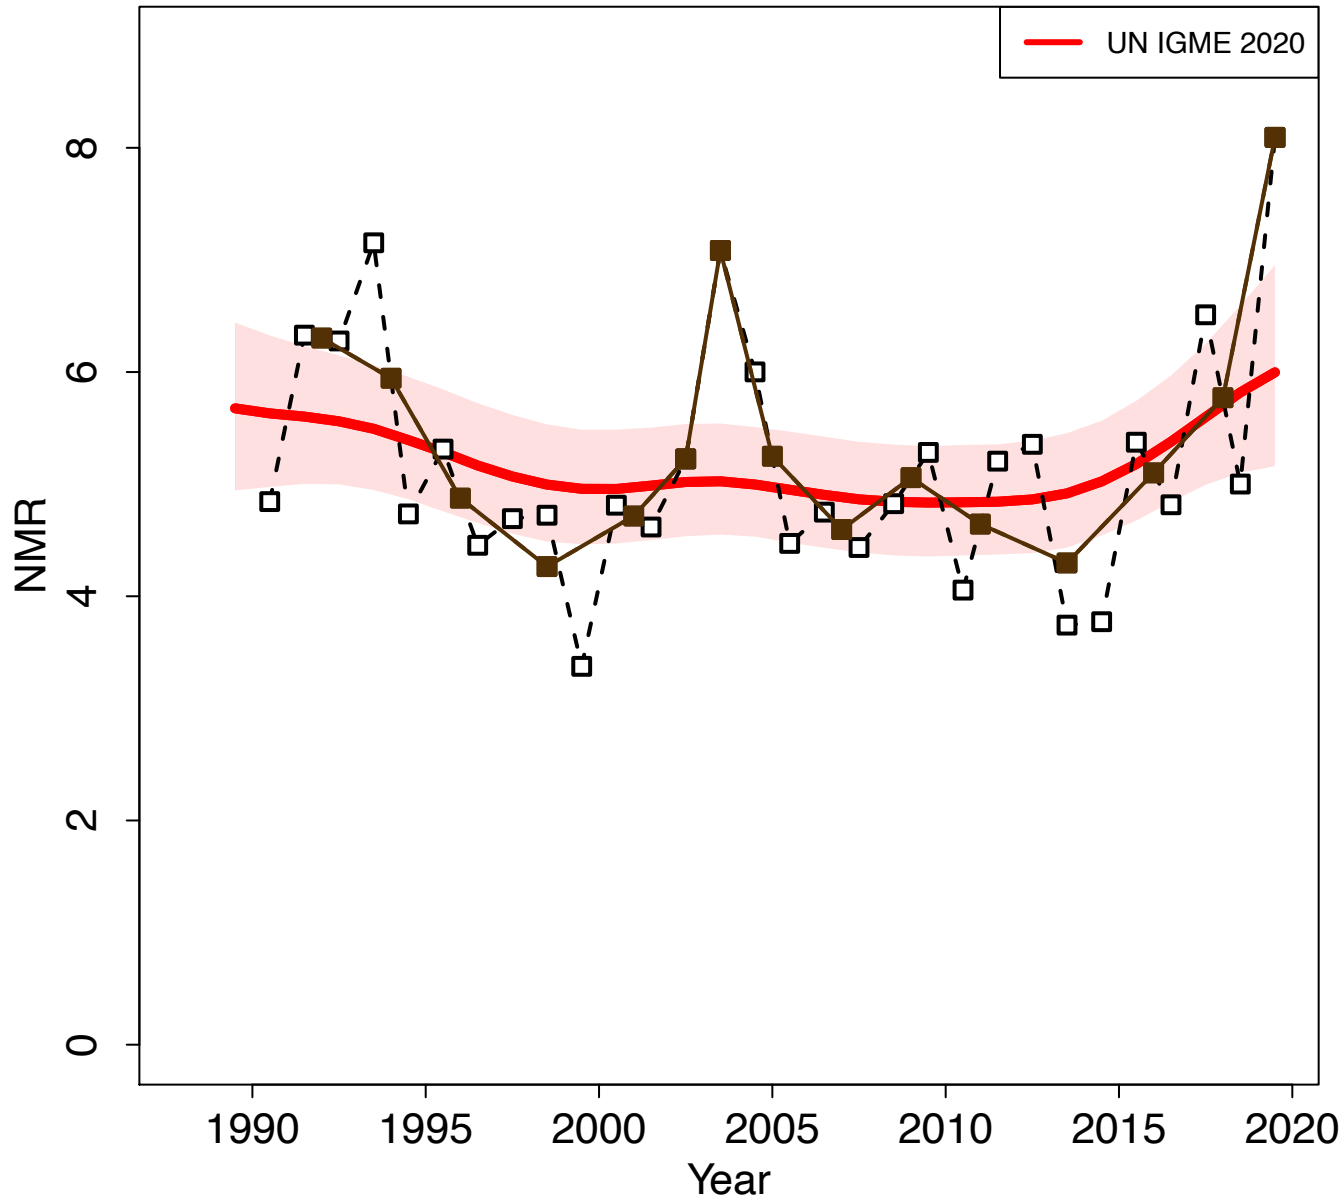

# Zoomed in

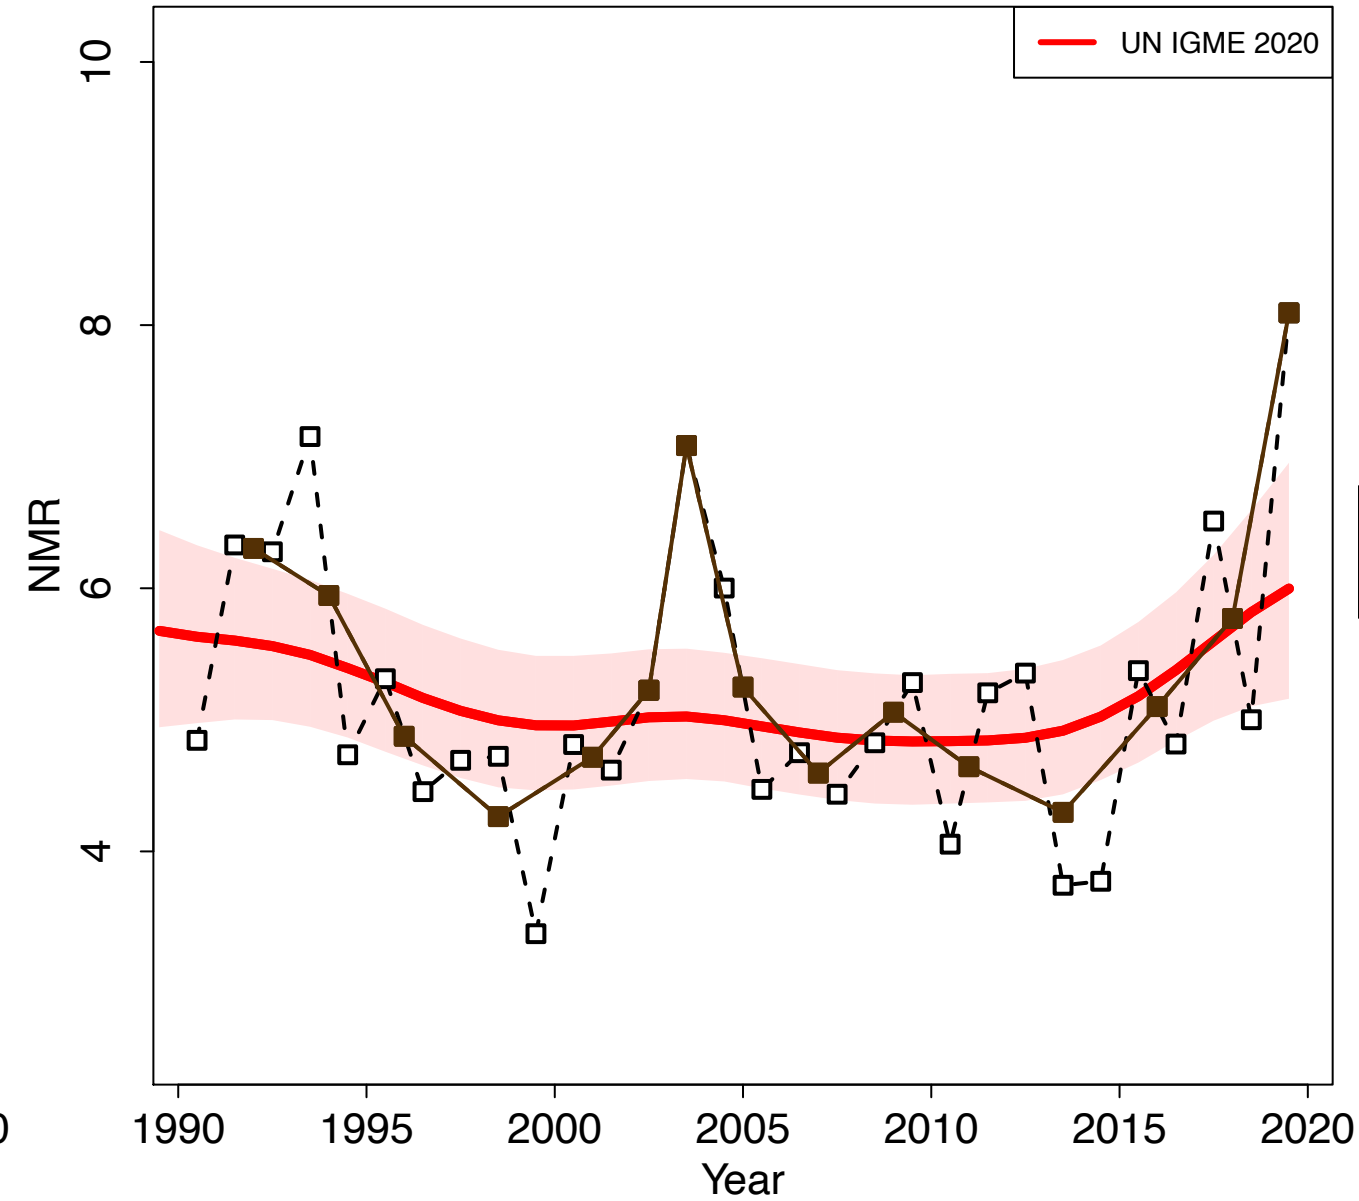

# Bulgaria

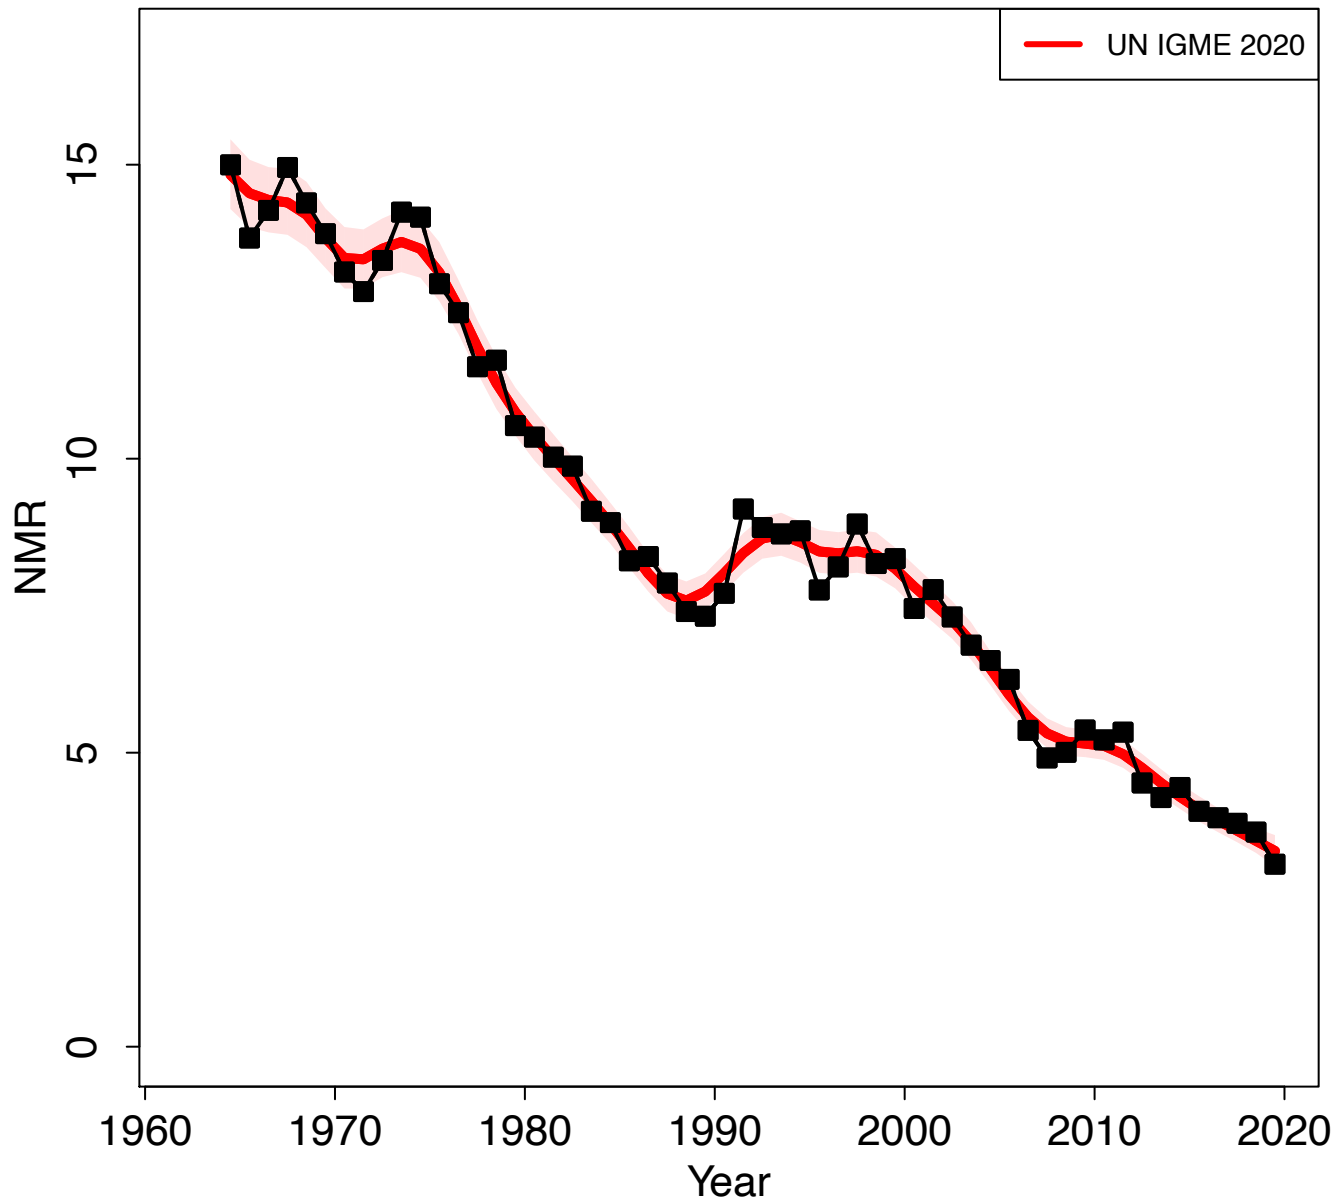

# Zoomed in

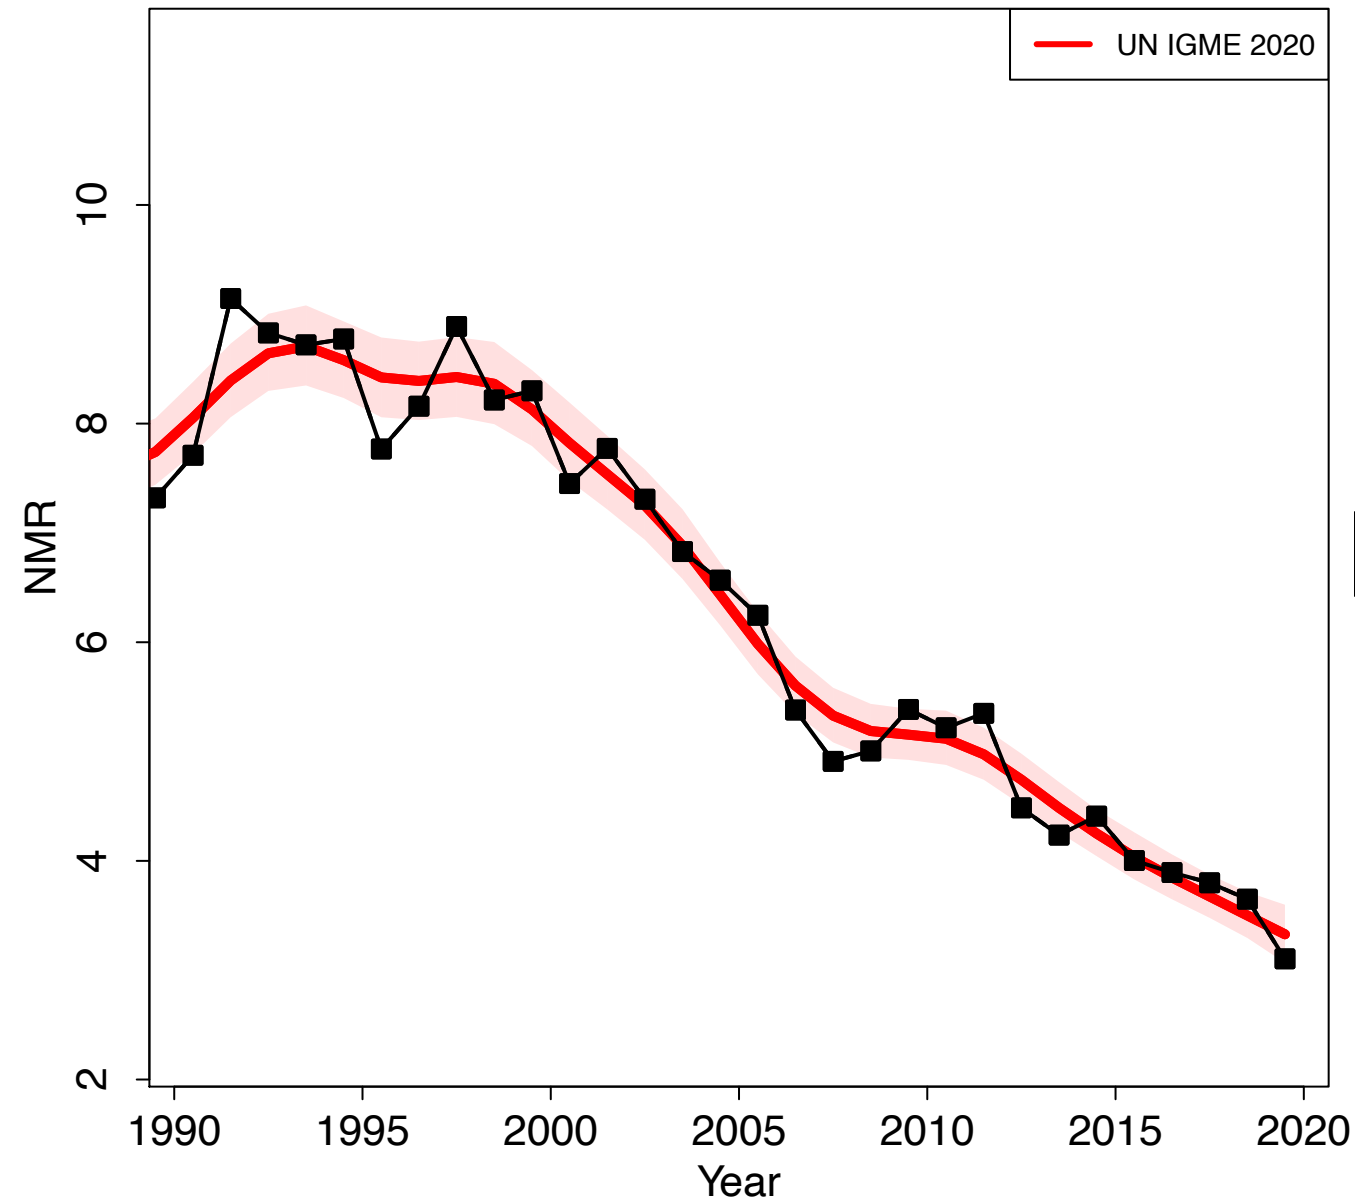

# Burkina Faso

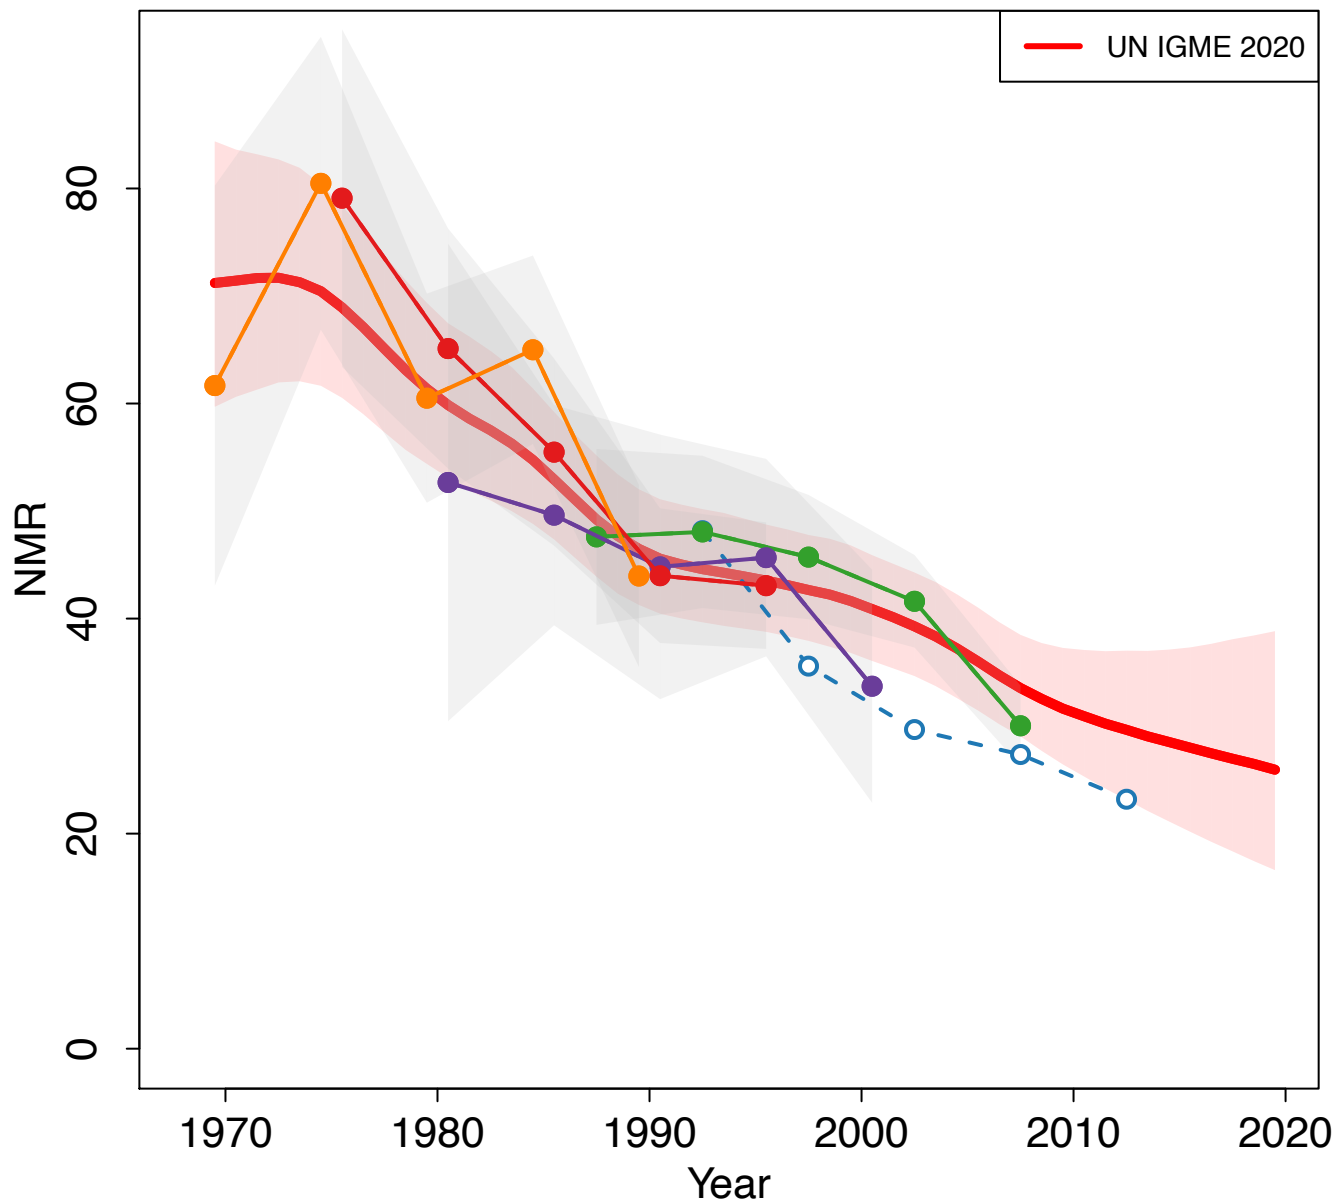

# Zoomed in

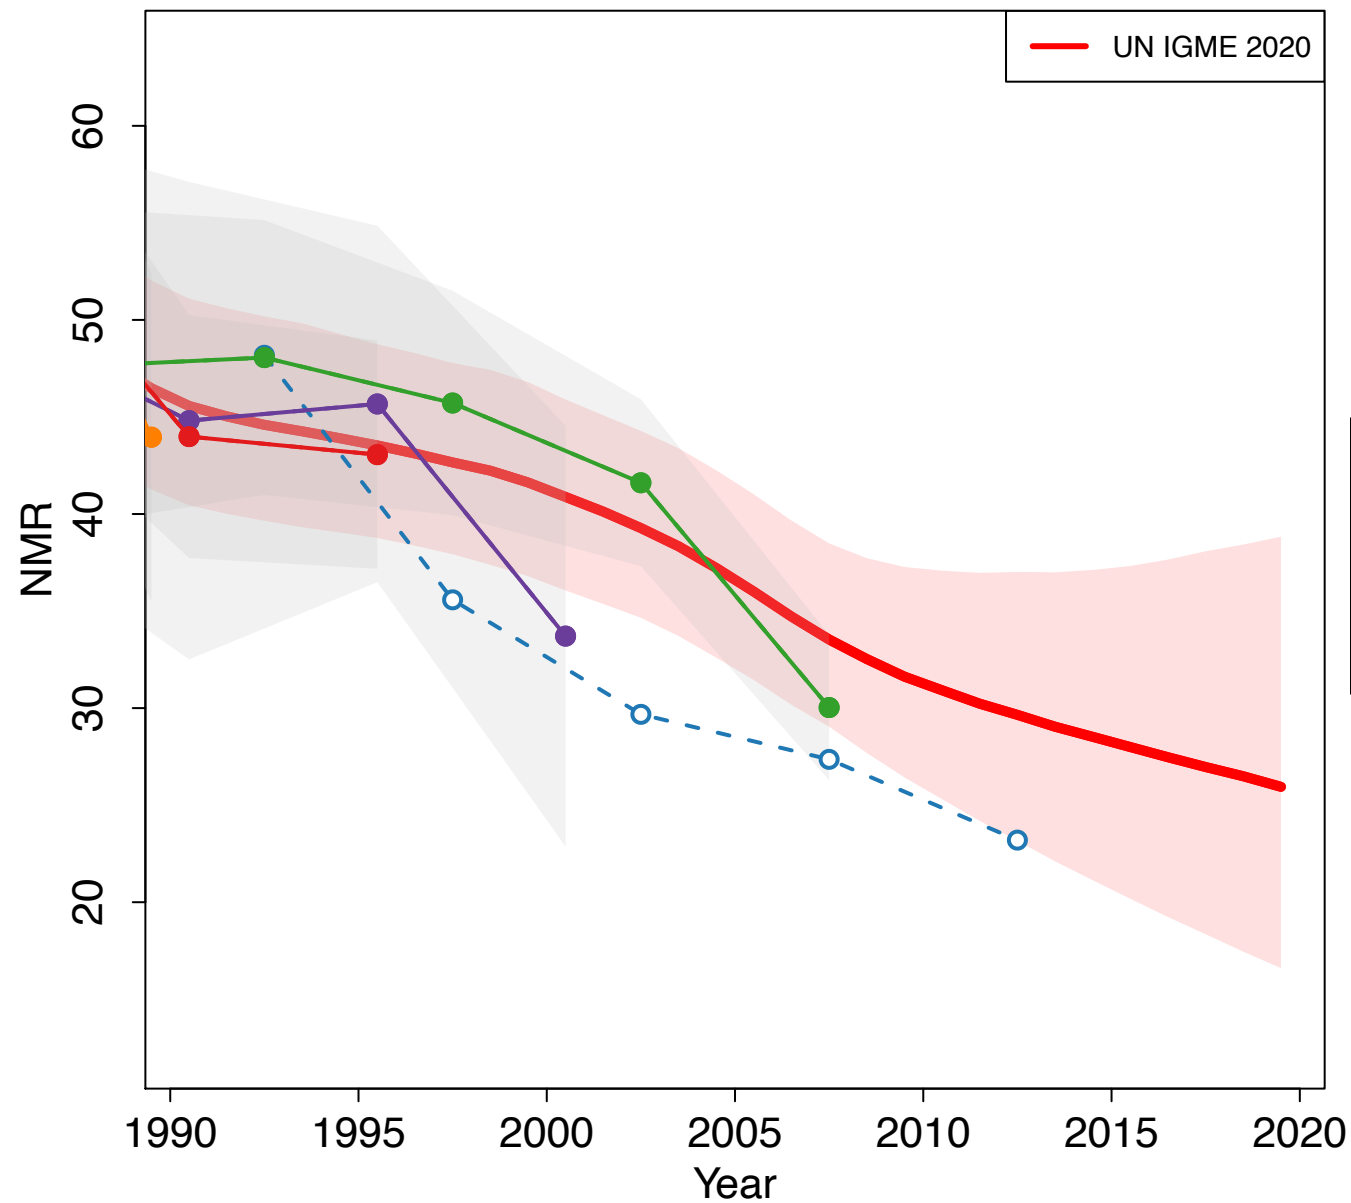



# Burundi

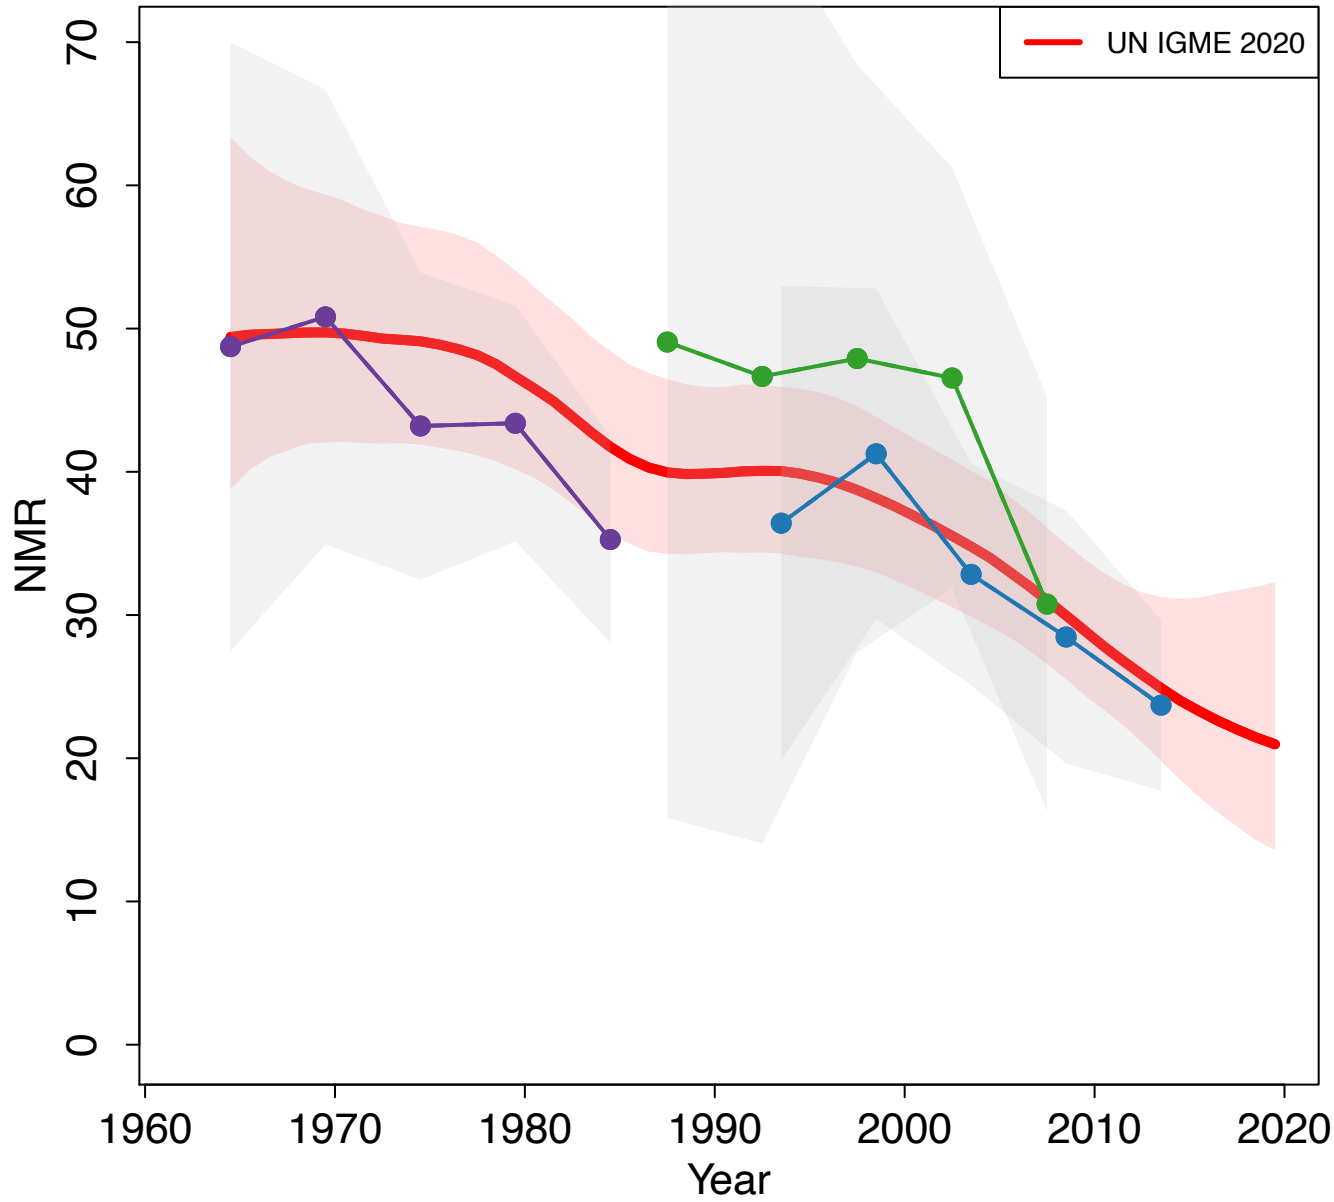

# Zoomed in

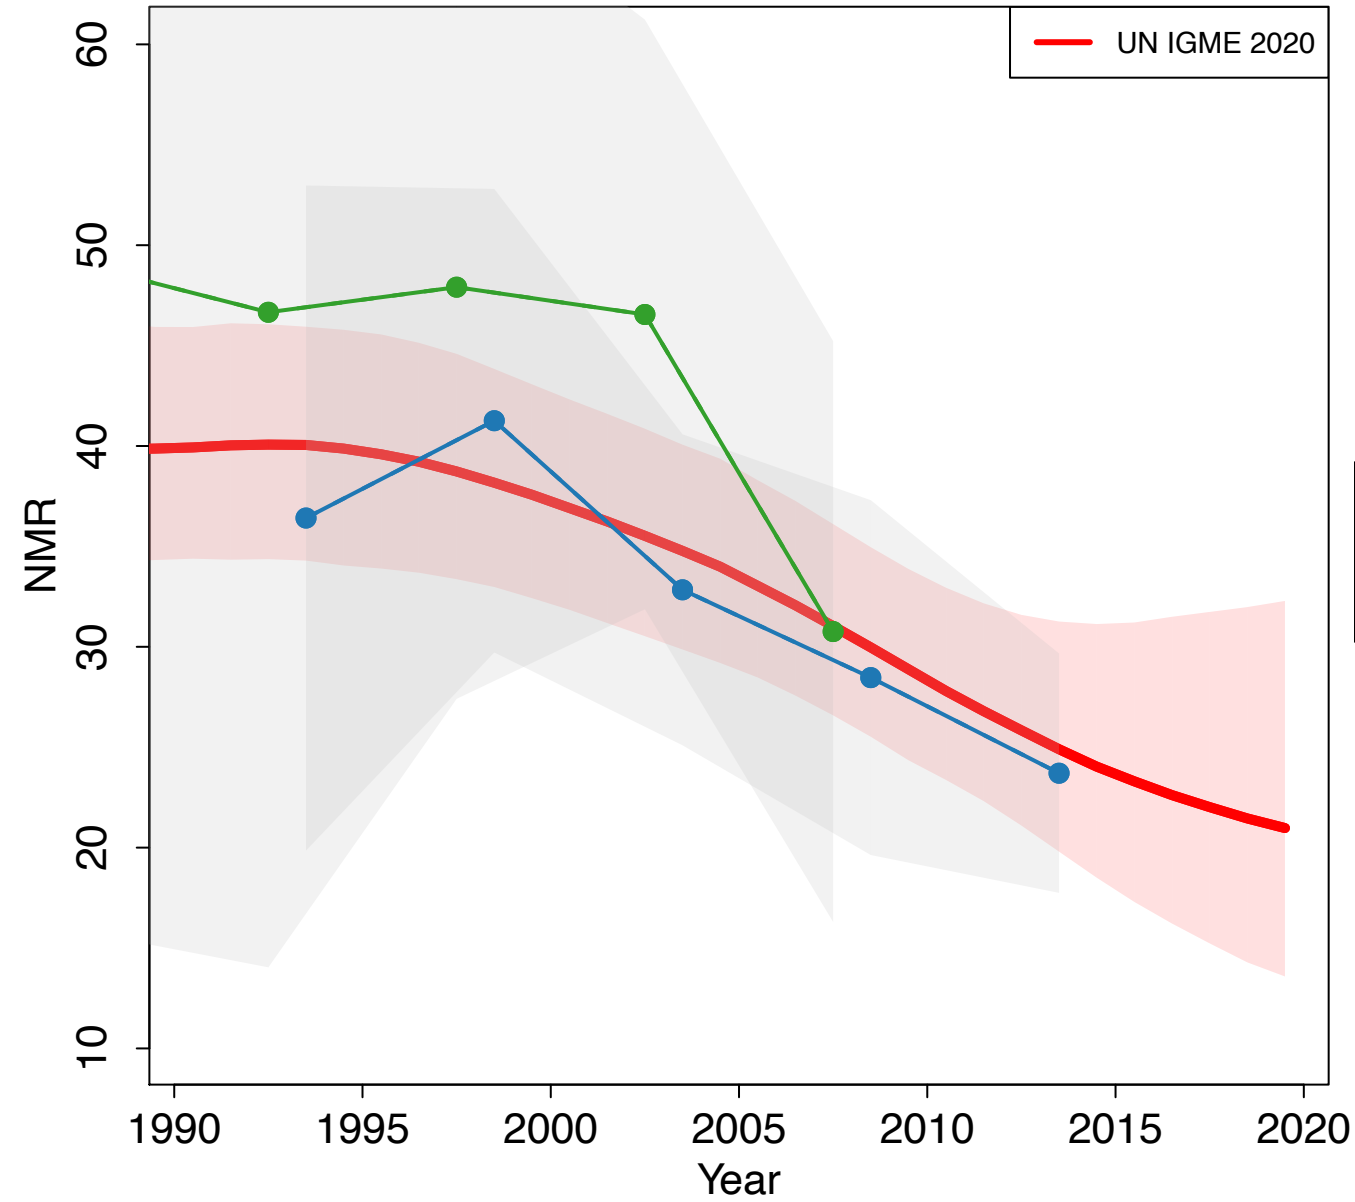

- Demographic and Health Survey 1987 (DHS)
- Demographic and Health Survey 2011 (DHS)
- Demographic and Health Survey 2016–2017 (DHS)

# Cambodia

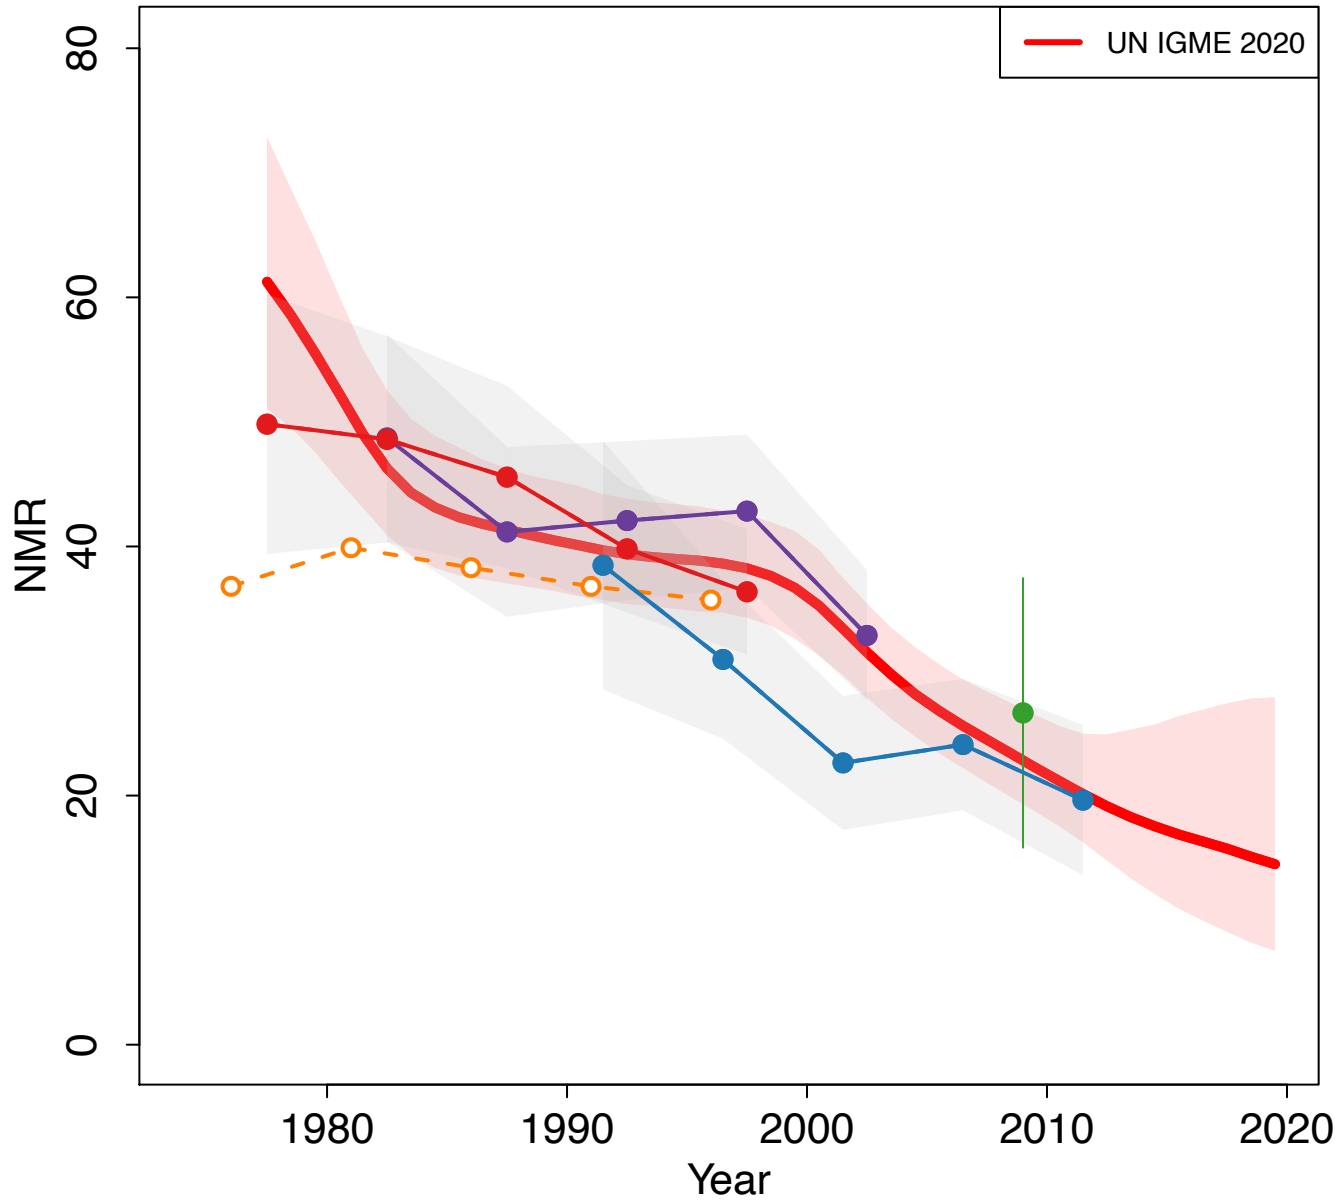

# Zoomed in

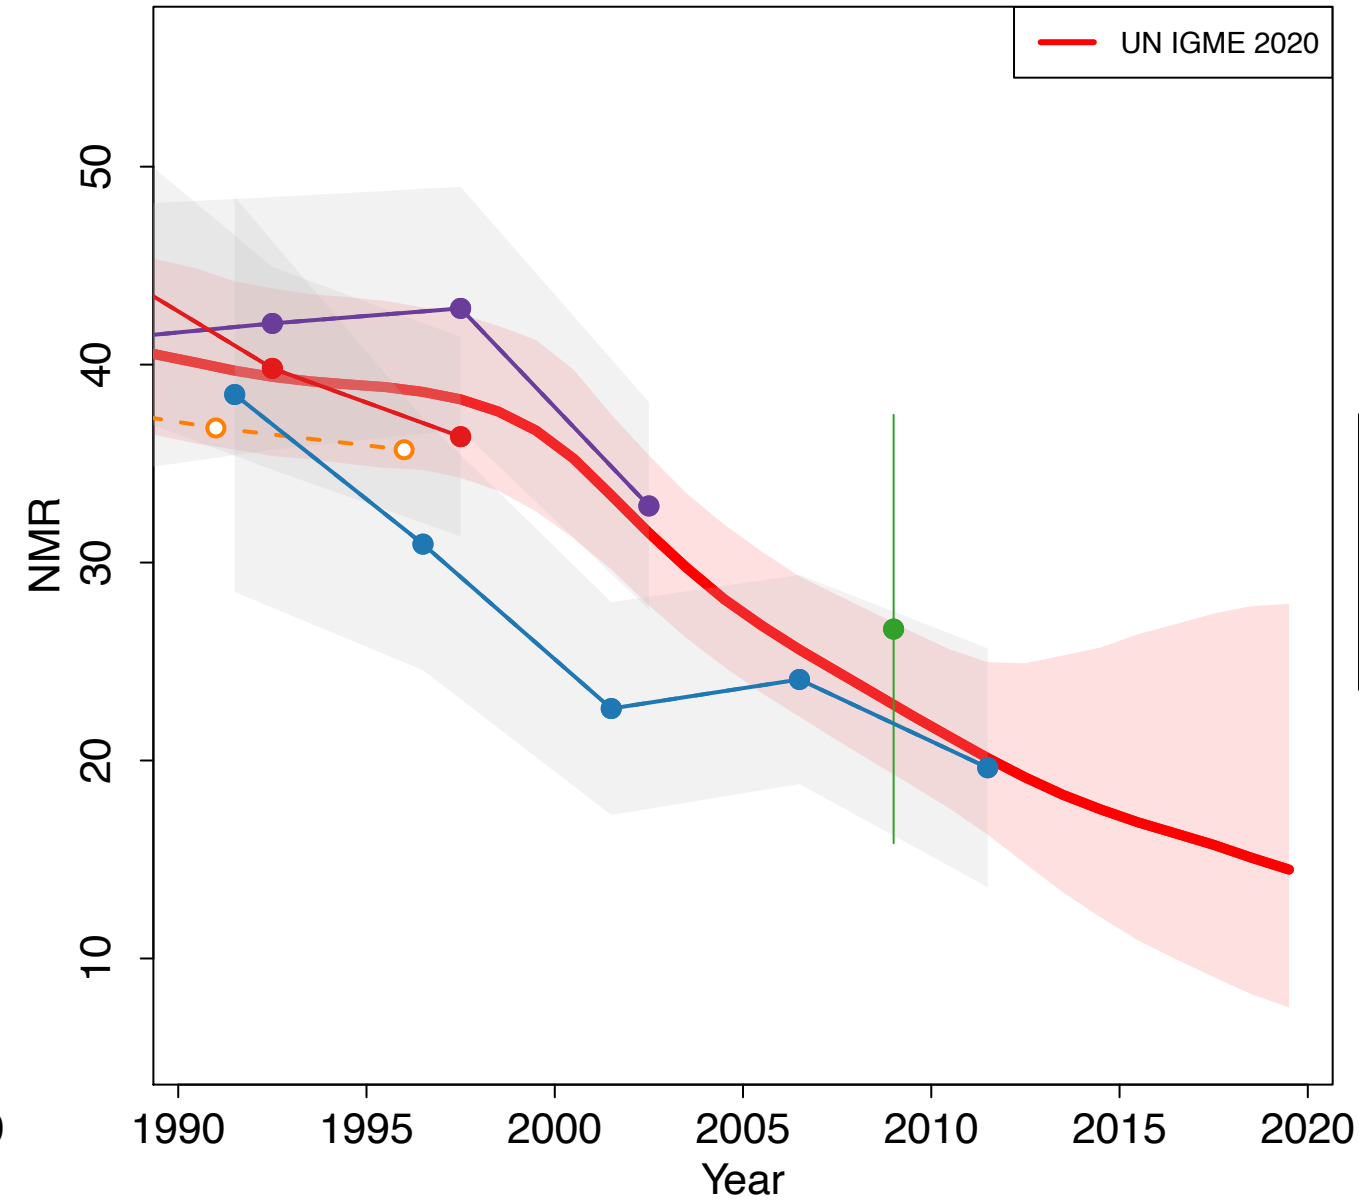

# Cameroon

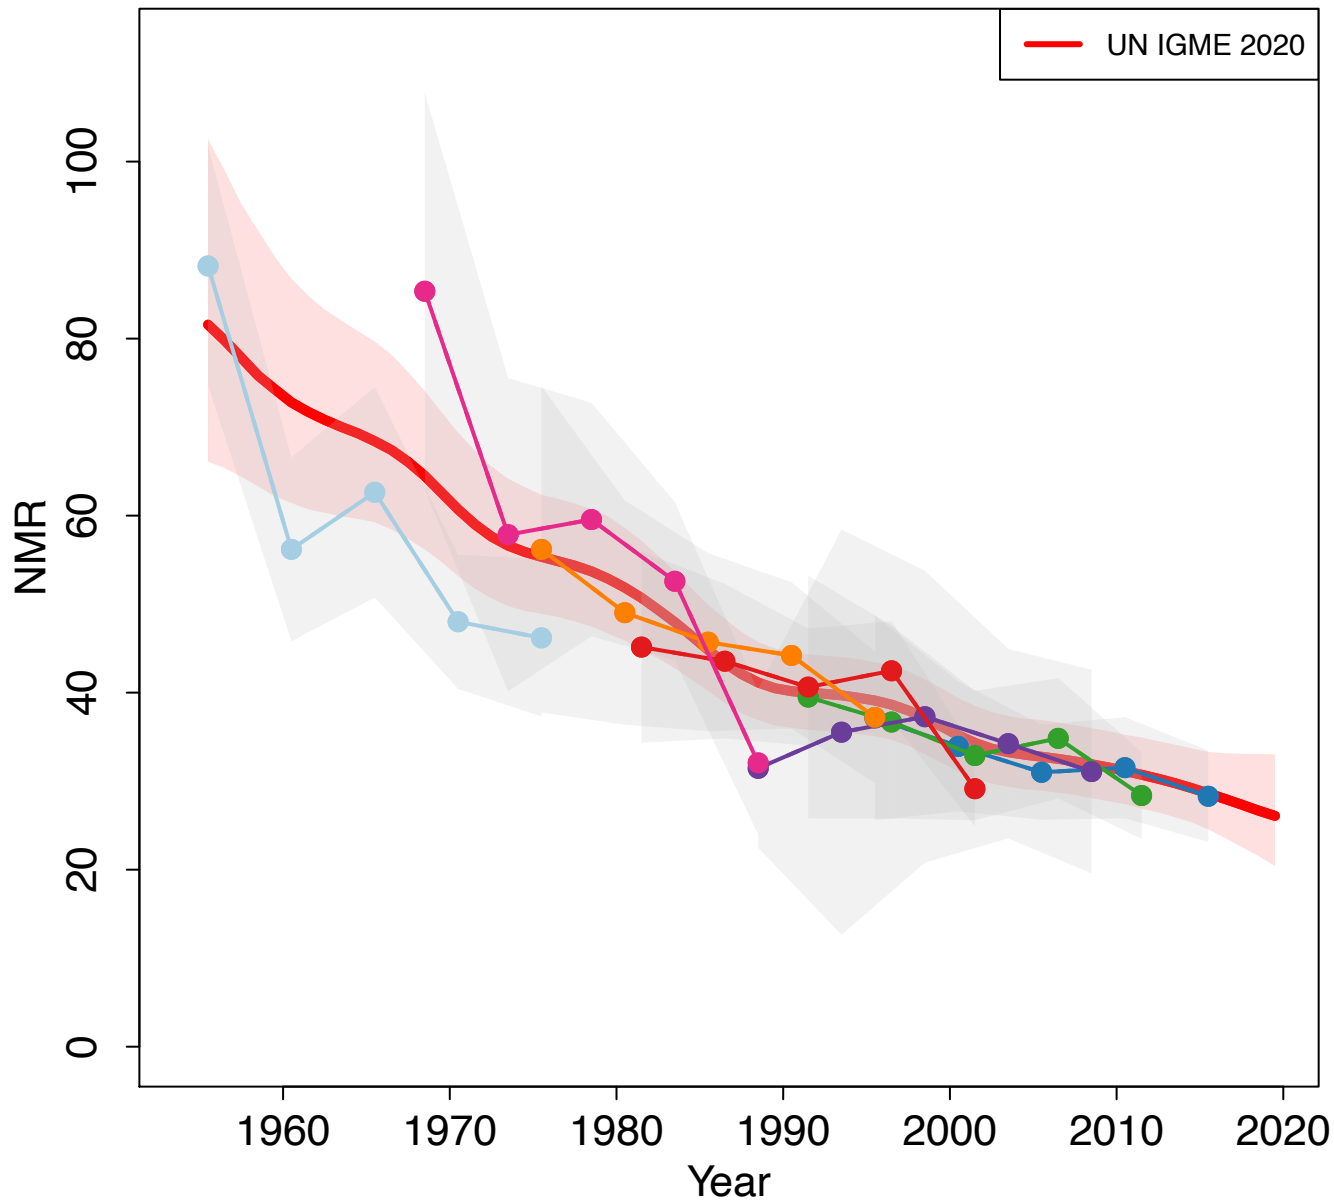

# Zoomed in

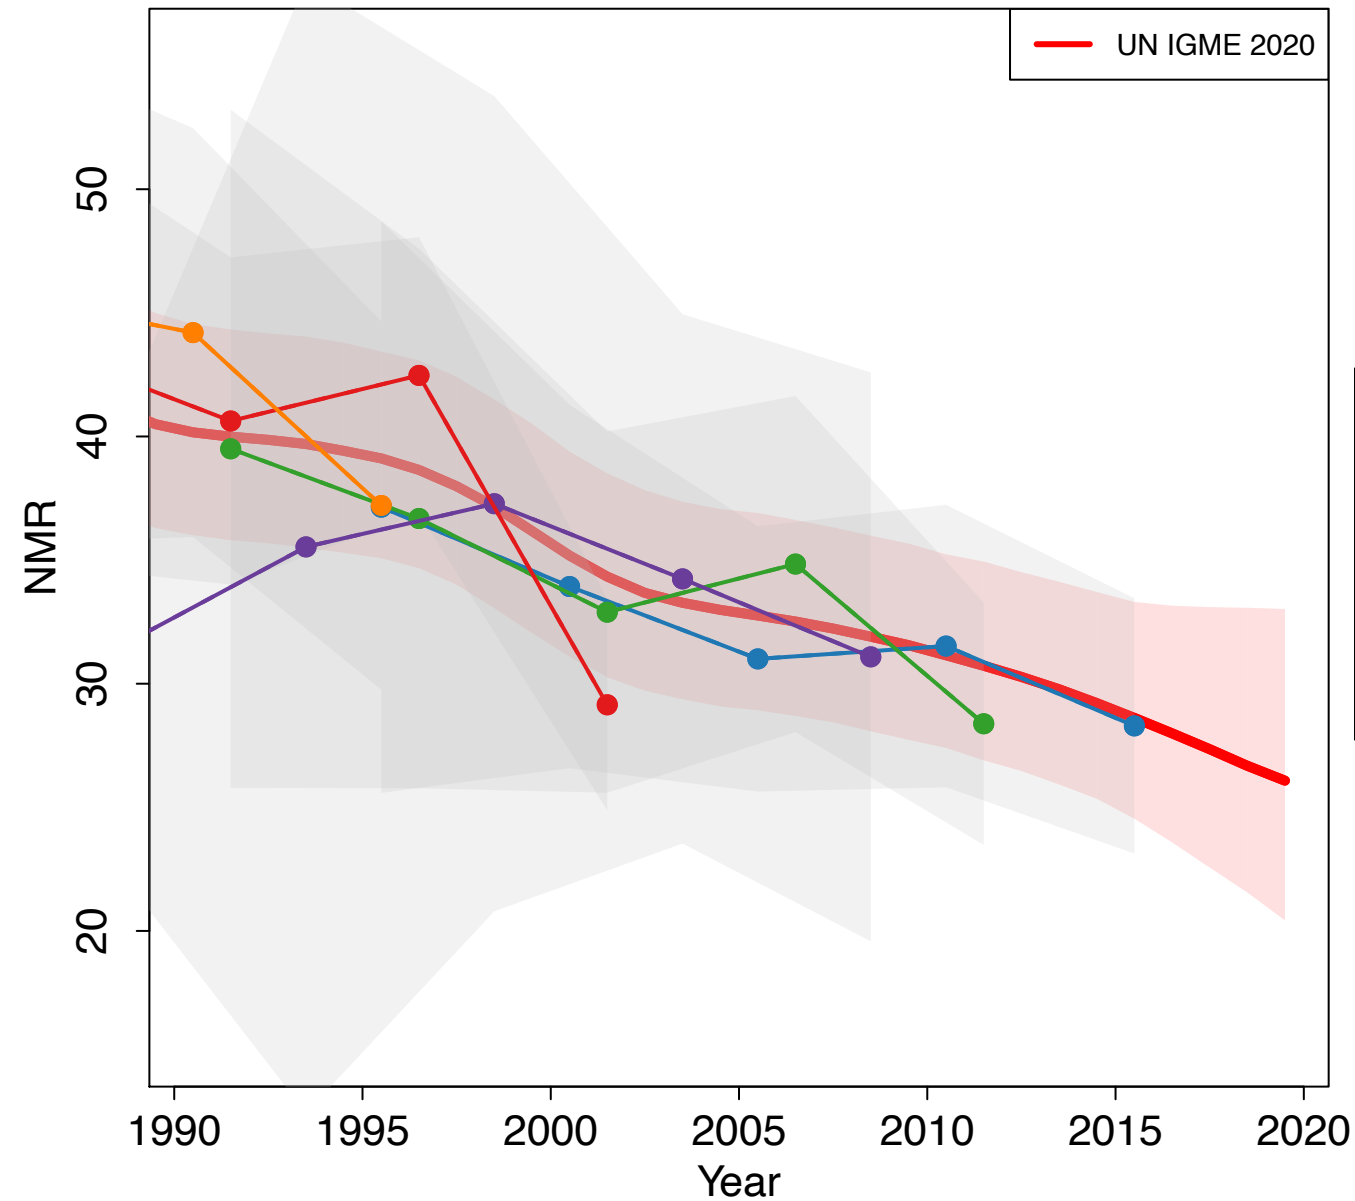

- World Fertility Survey 1978 (Other DHS)
- Demographic and Health Survey 1991 (DHS)
- Demographic and Health Survey 1998 (DHS)
- Demographic and Health Survey 2004 (DHS)
- Demographic and Health Survey 2011 (DHS)
- Multiple Indicator Cluster Surveys 2014 (MICS)
- Demographic and Health Survey 2018 (DHS)

# Canada

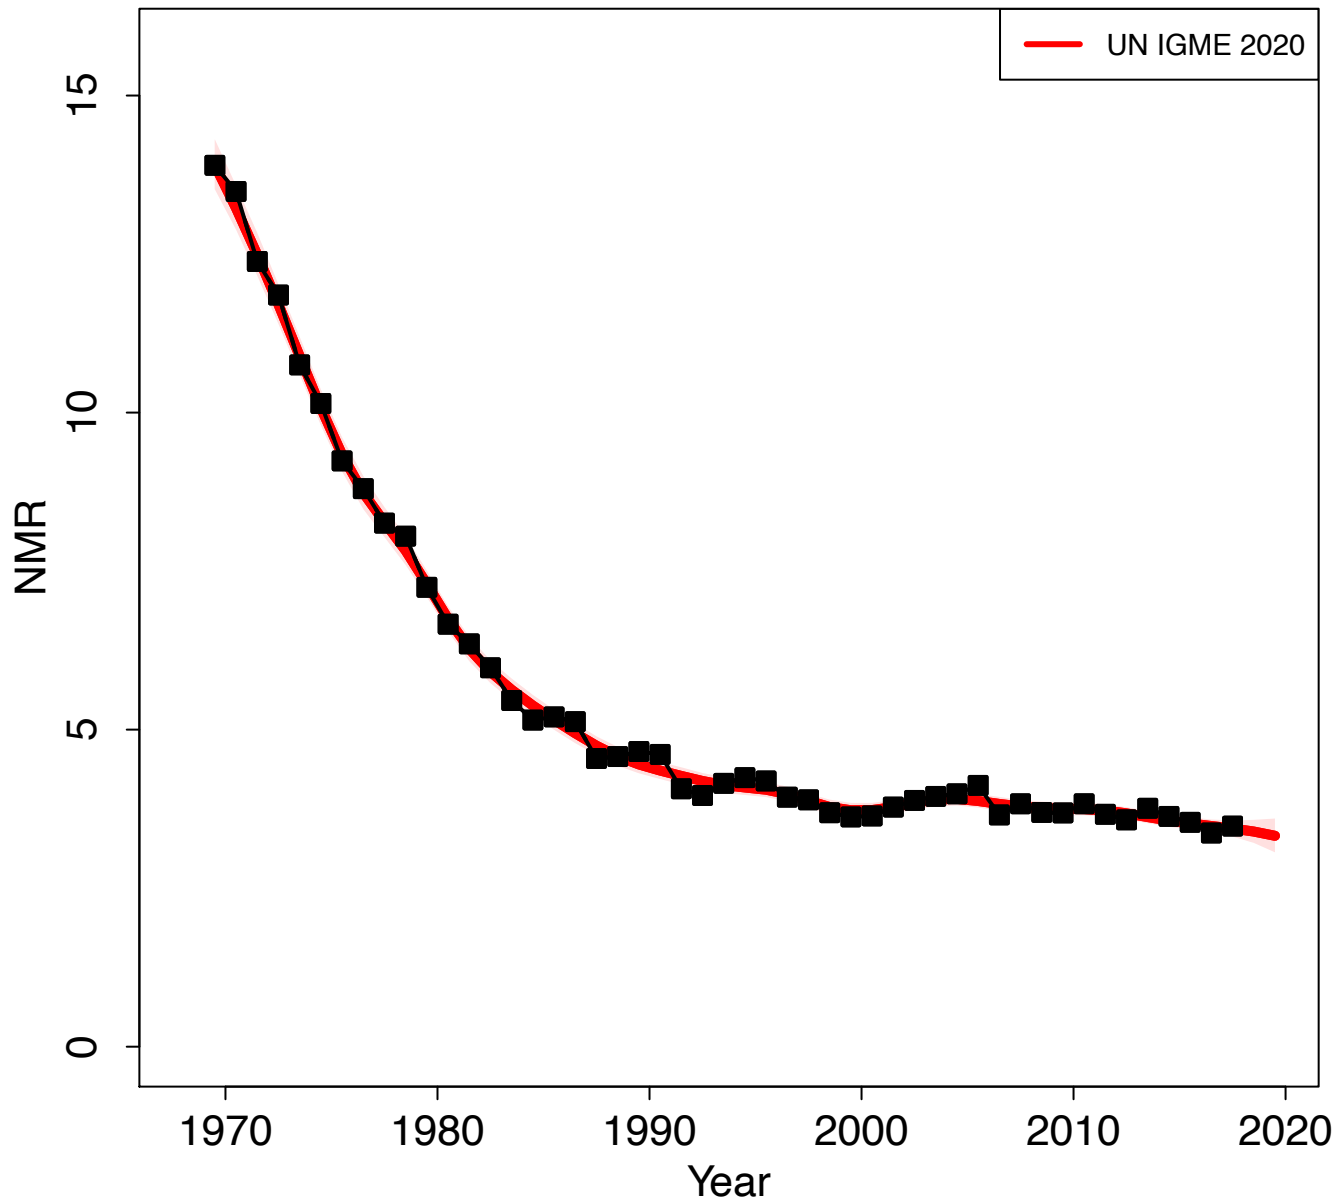

# Zoomed in

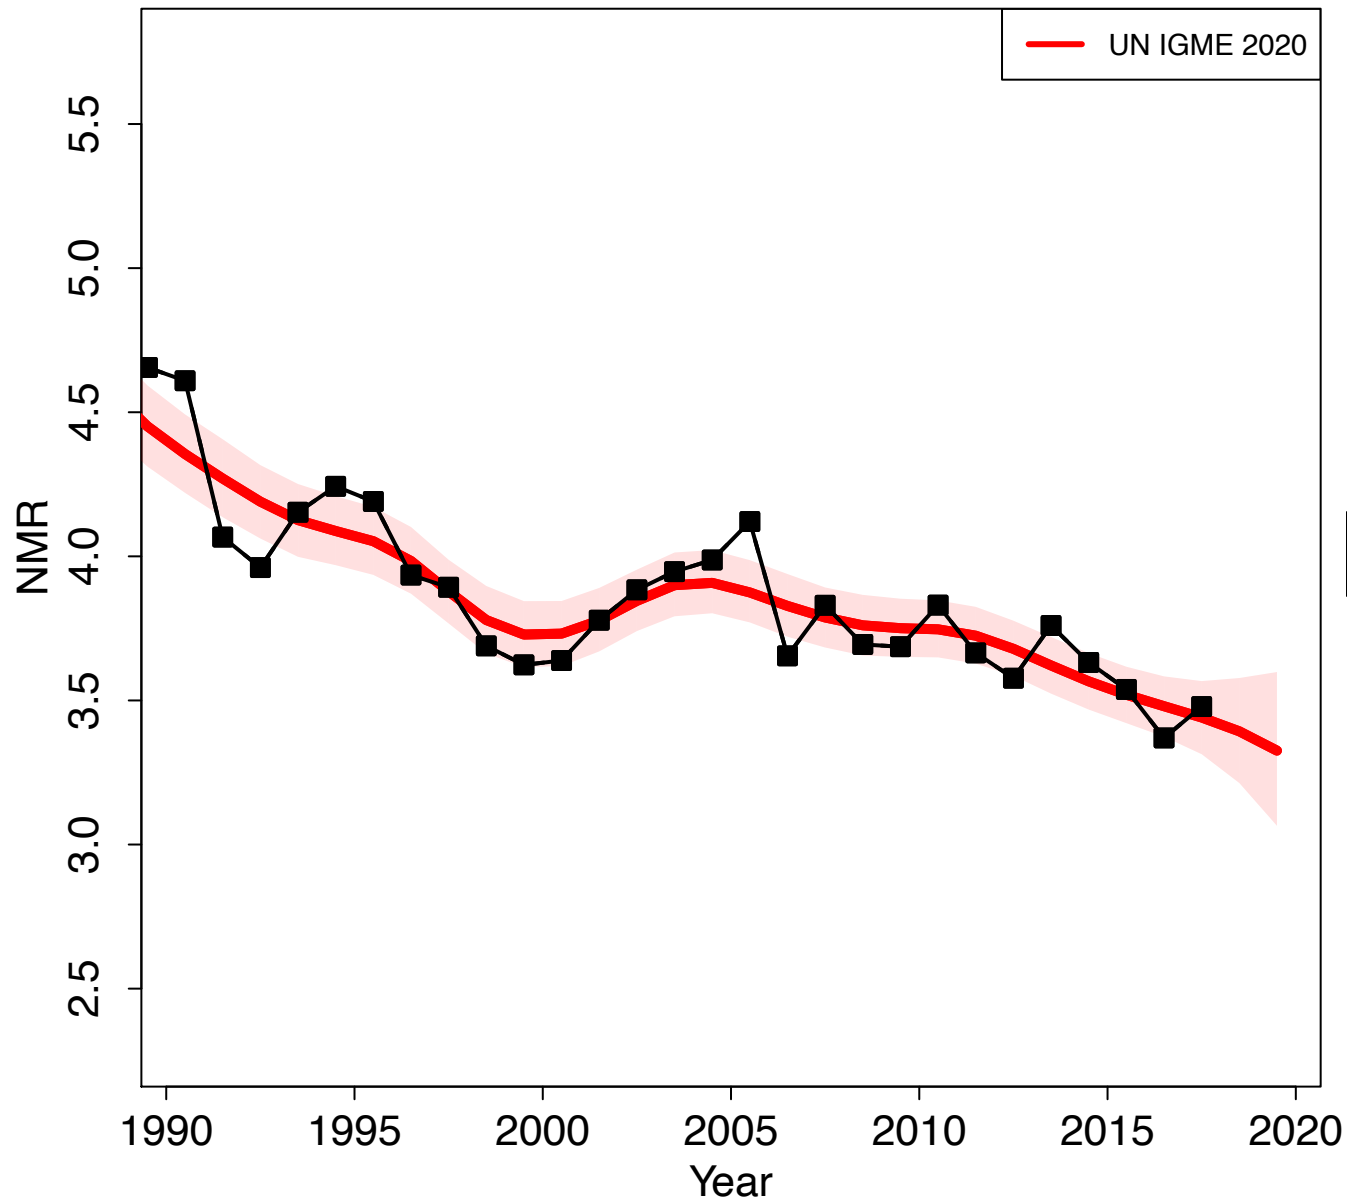

# Cabo Verde

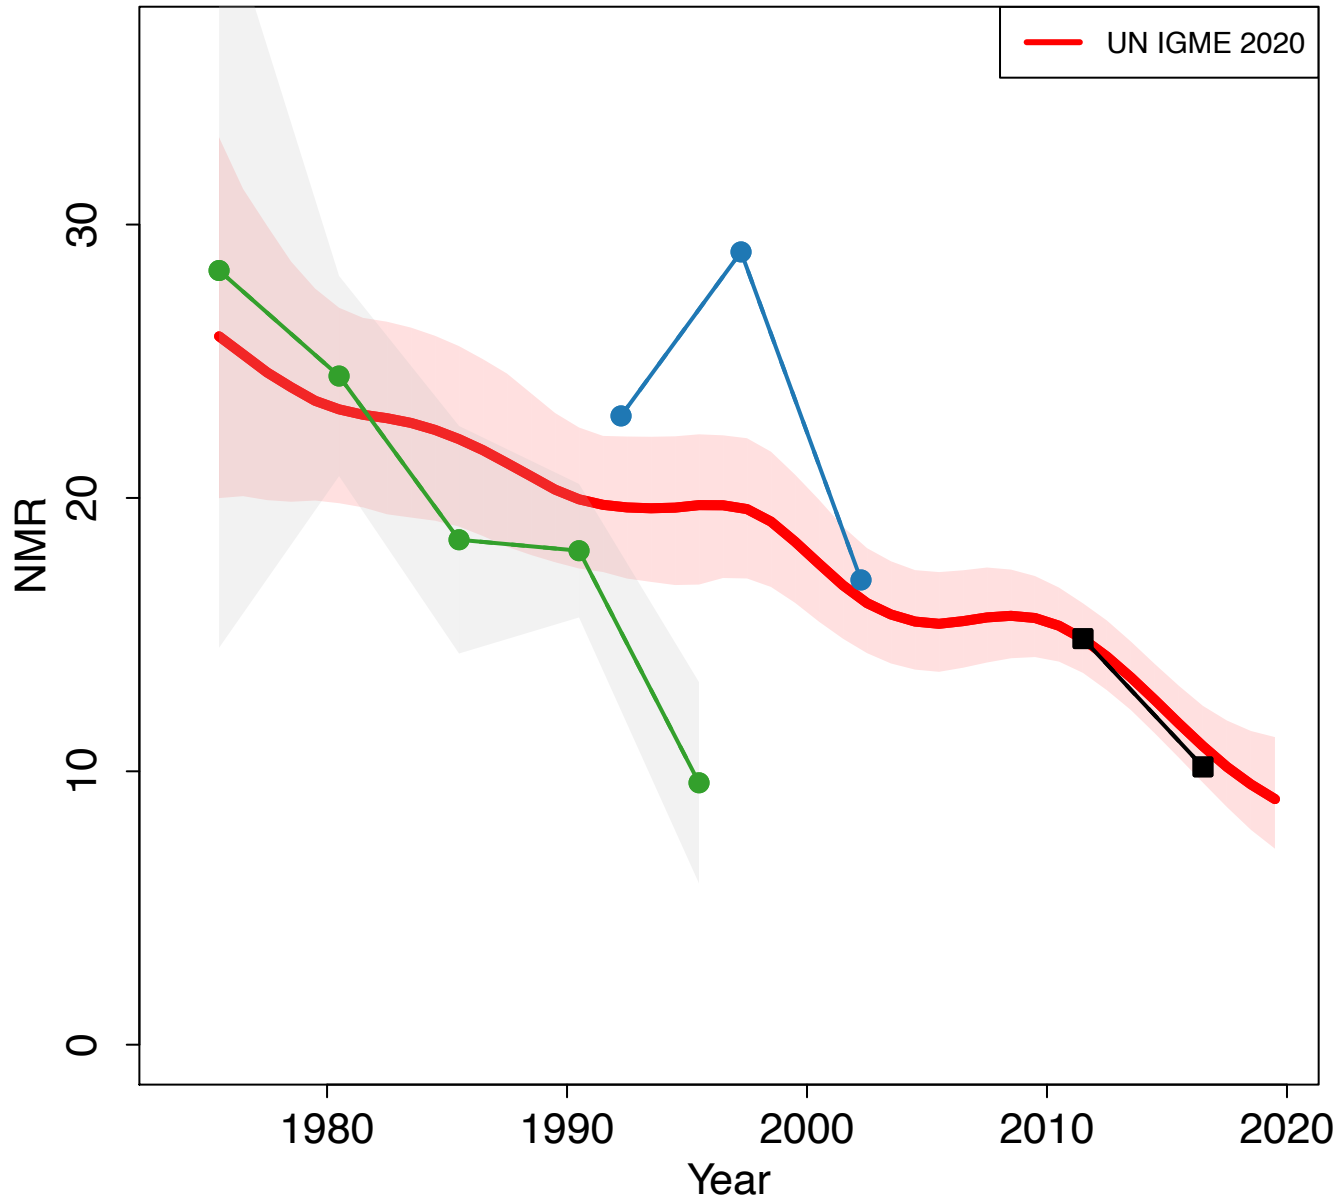

# Zoomed in

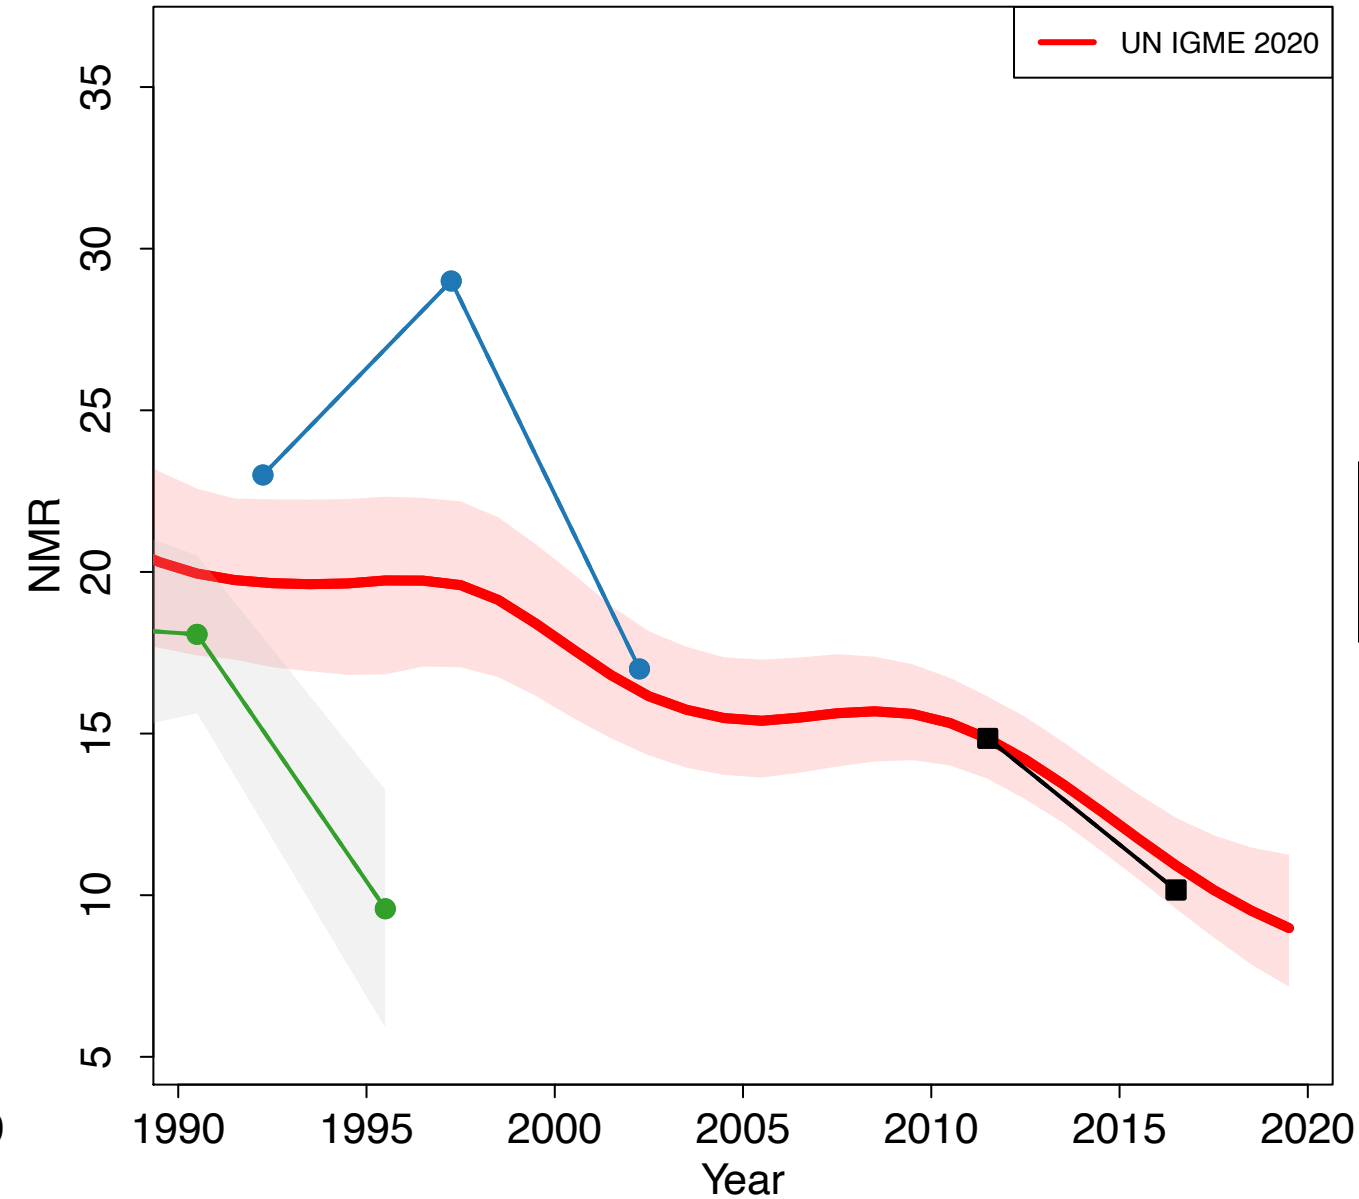

# Central African Republic

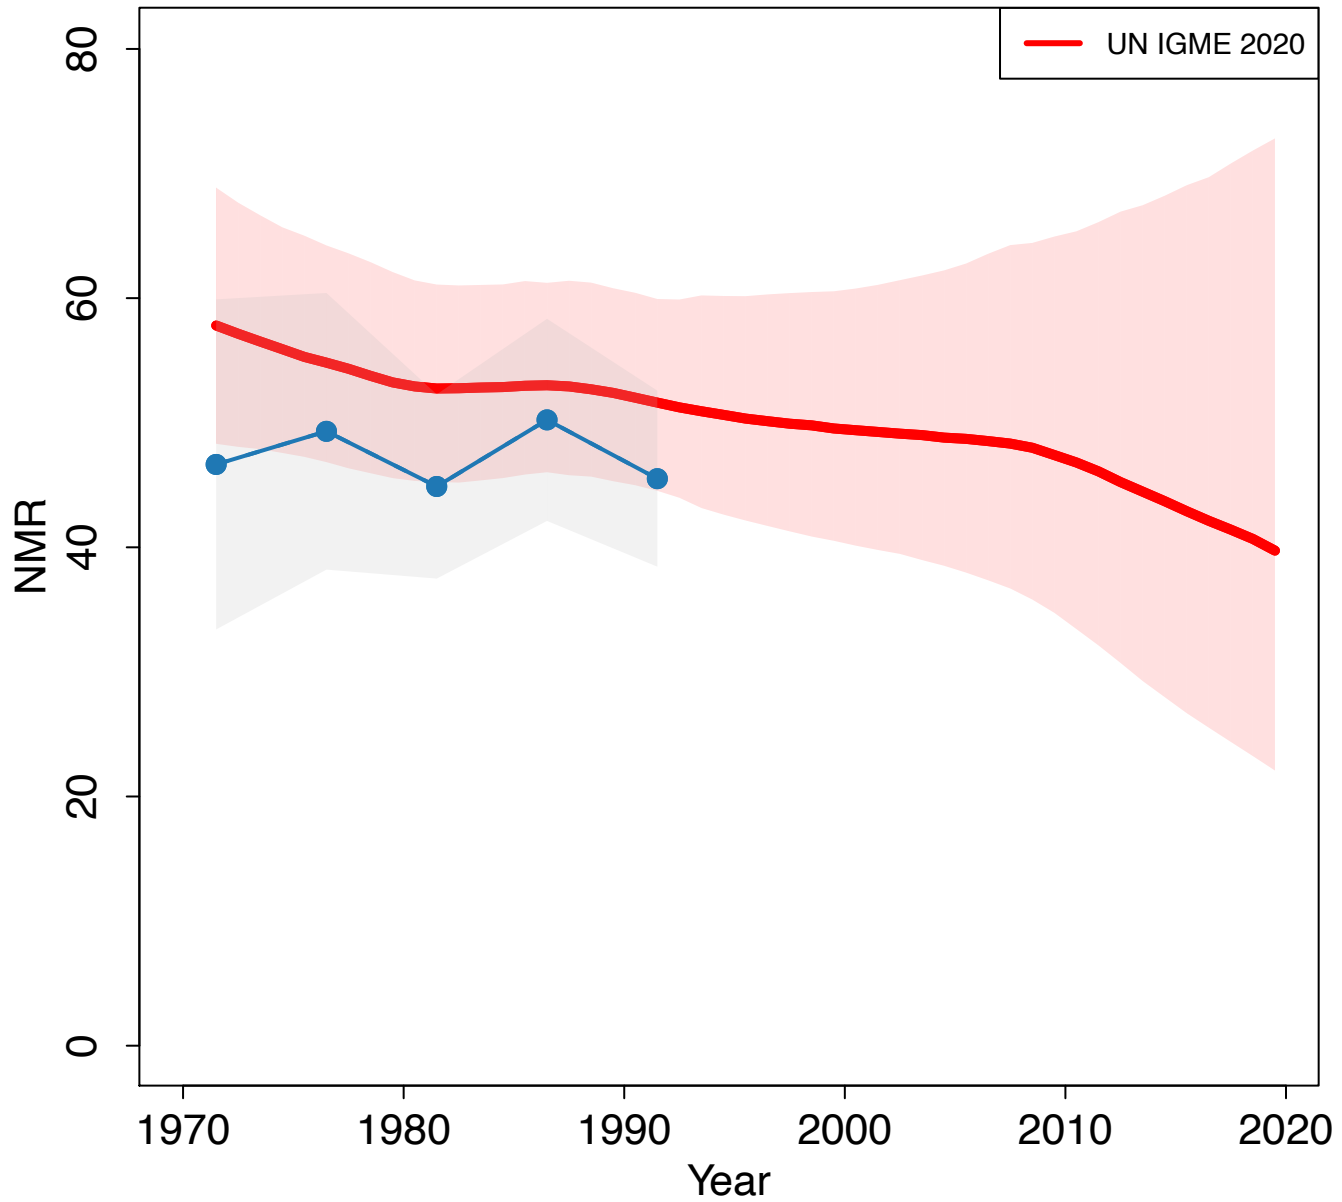

# Zoomed in

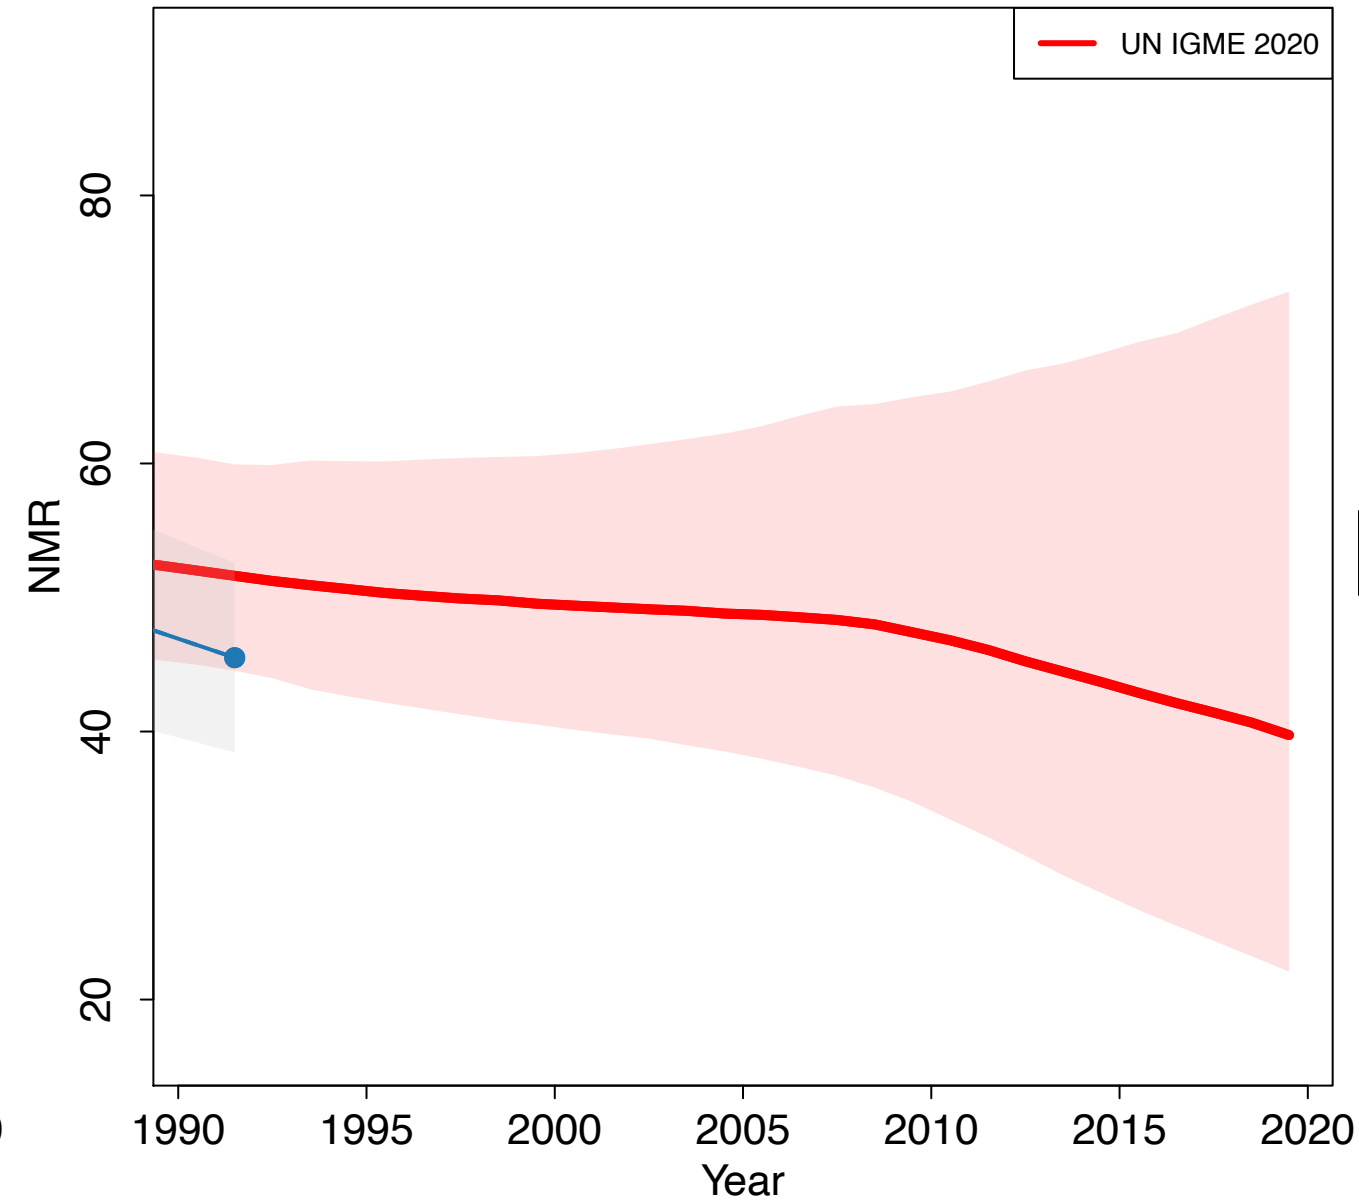

# Chad

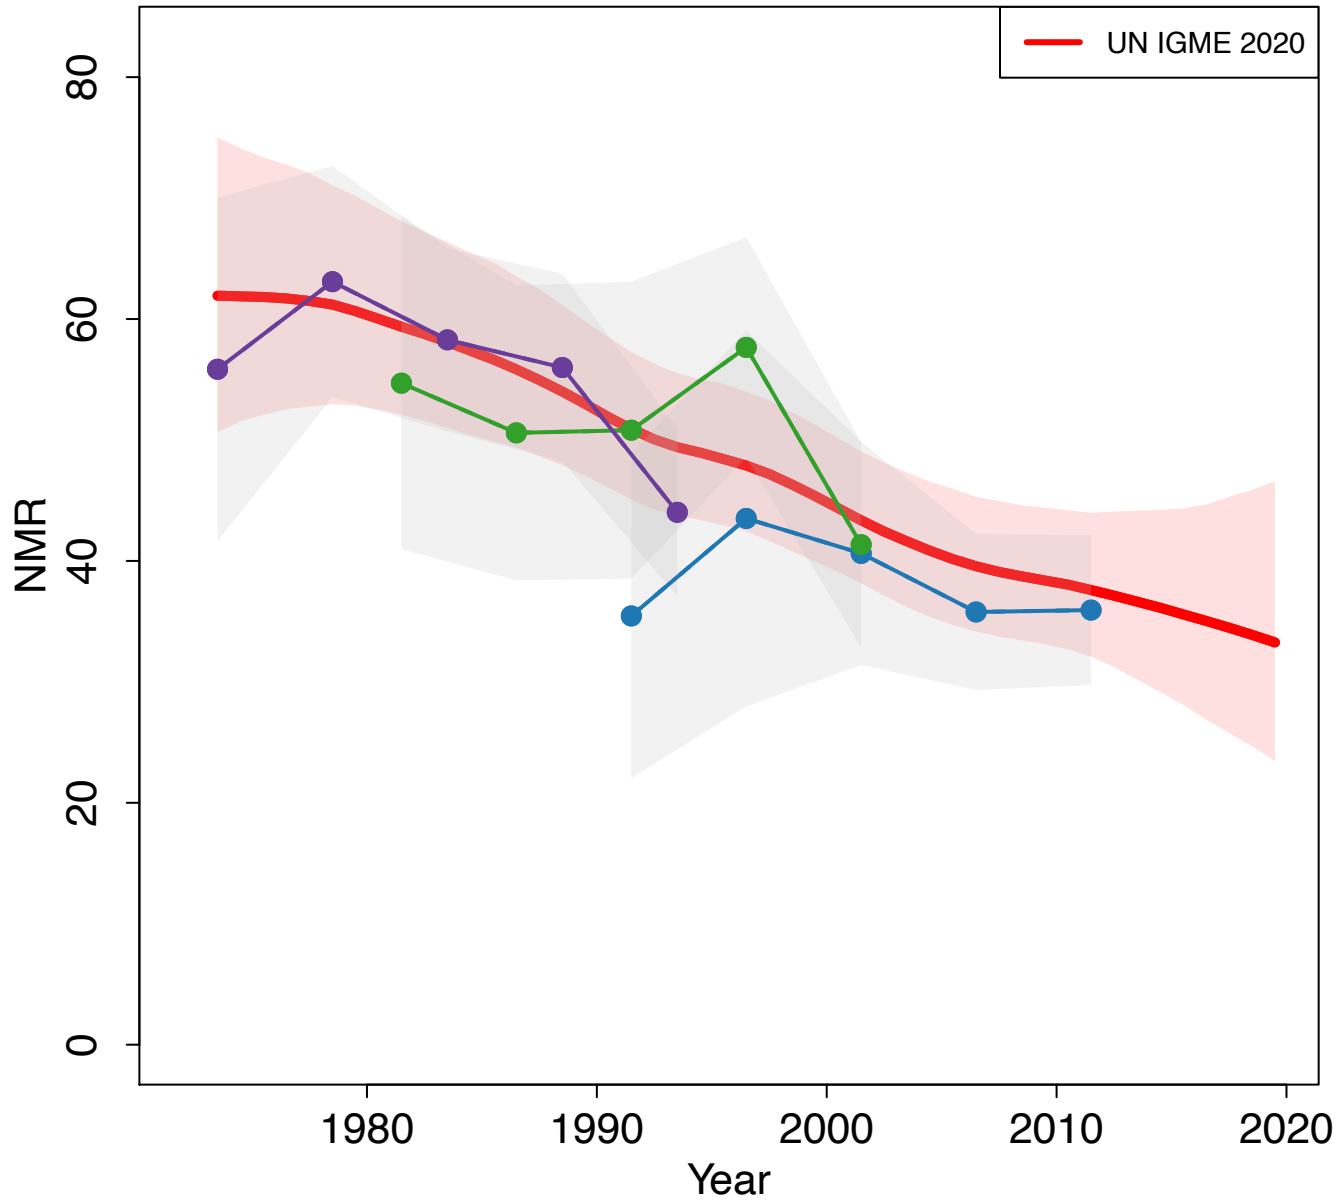

# Zoomed in

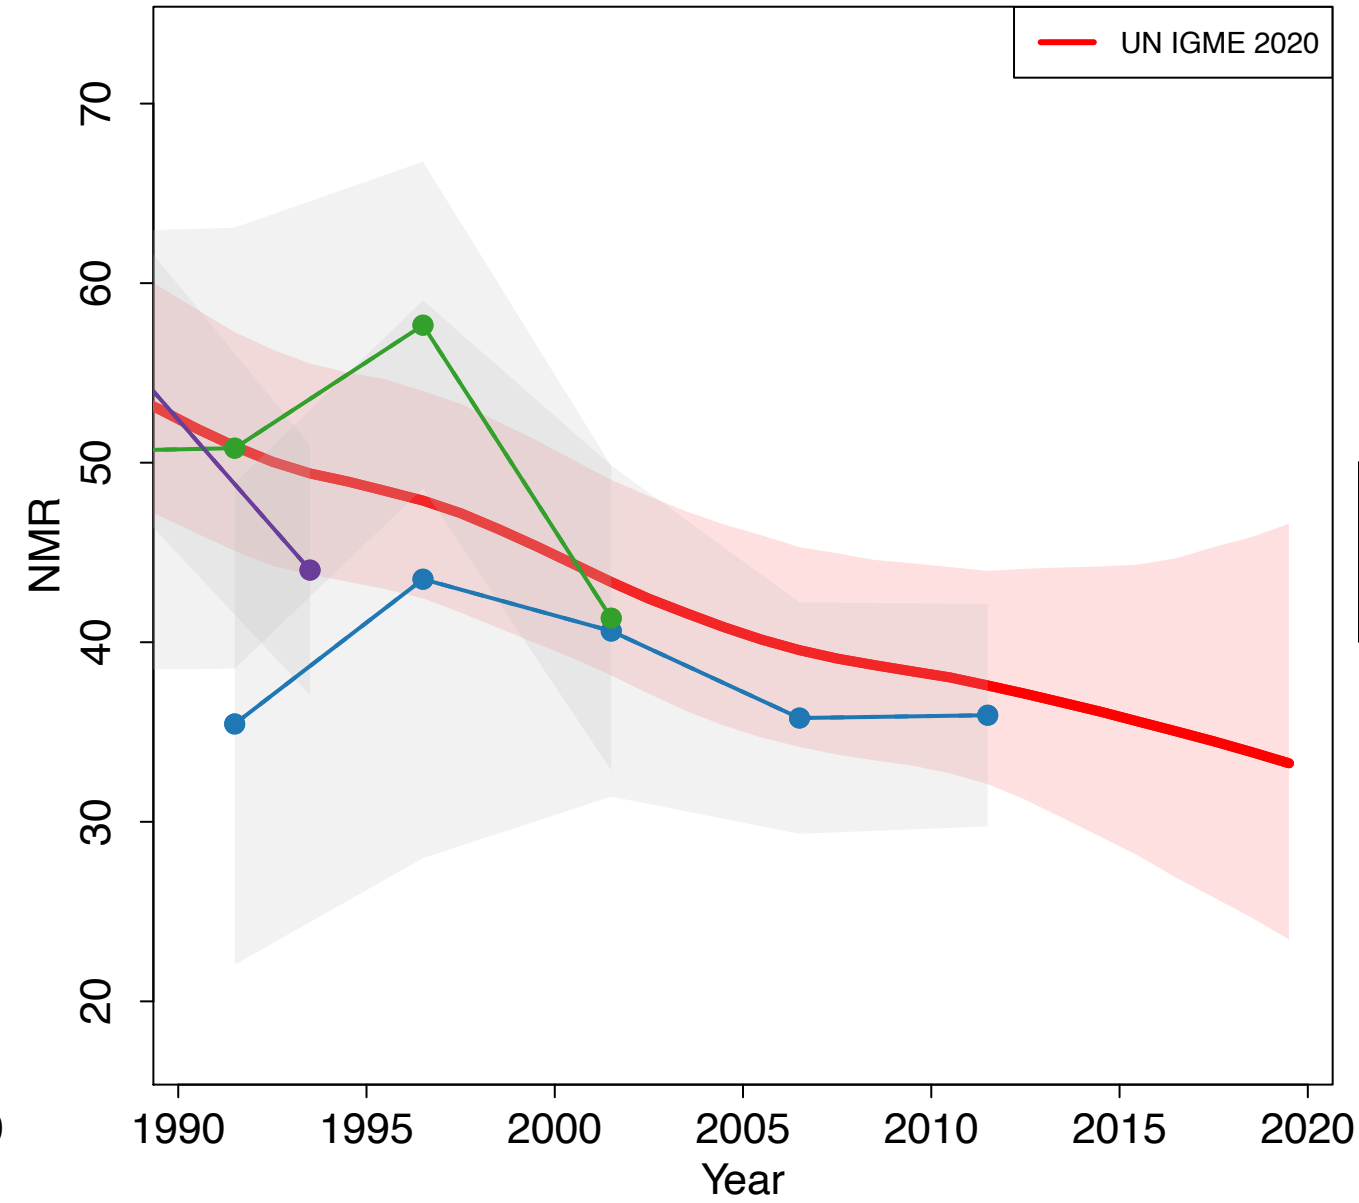

# Chile

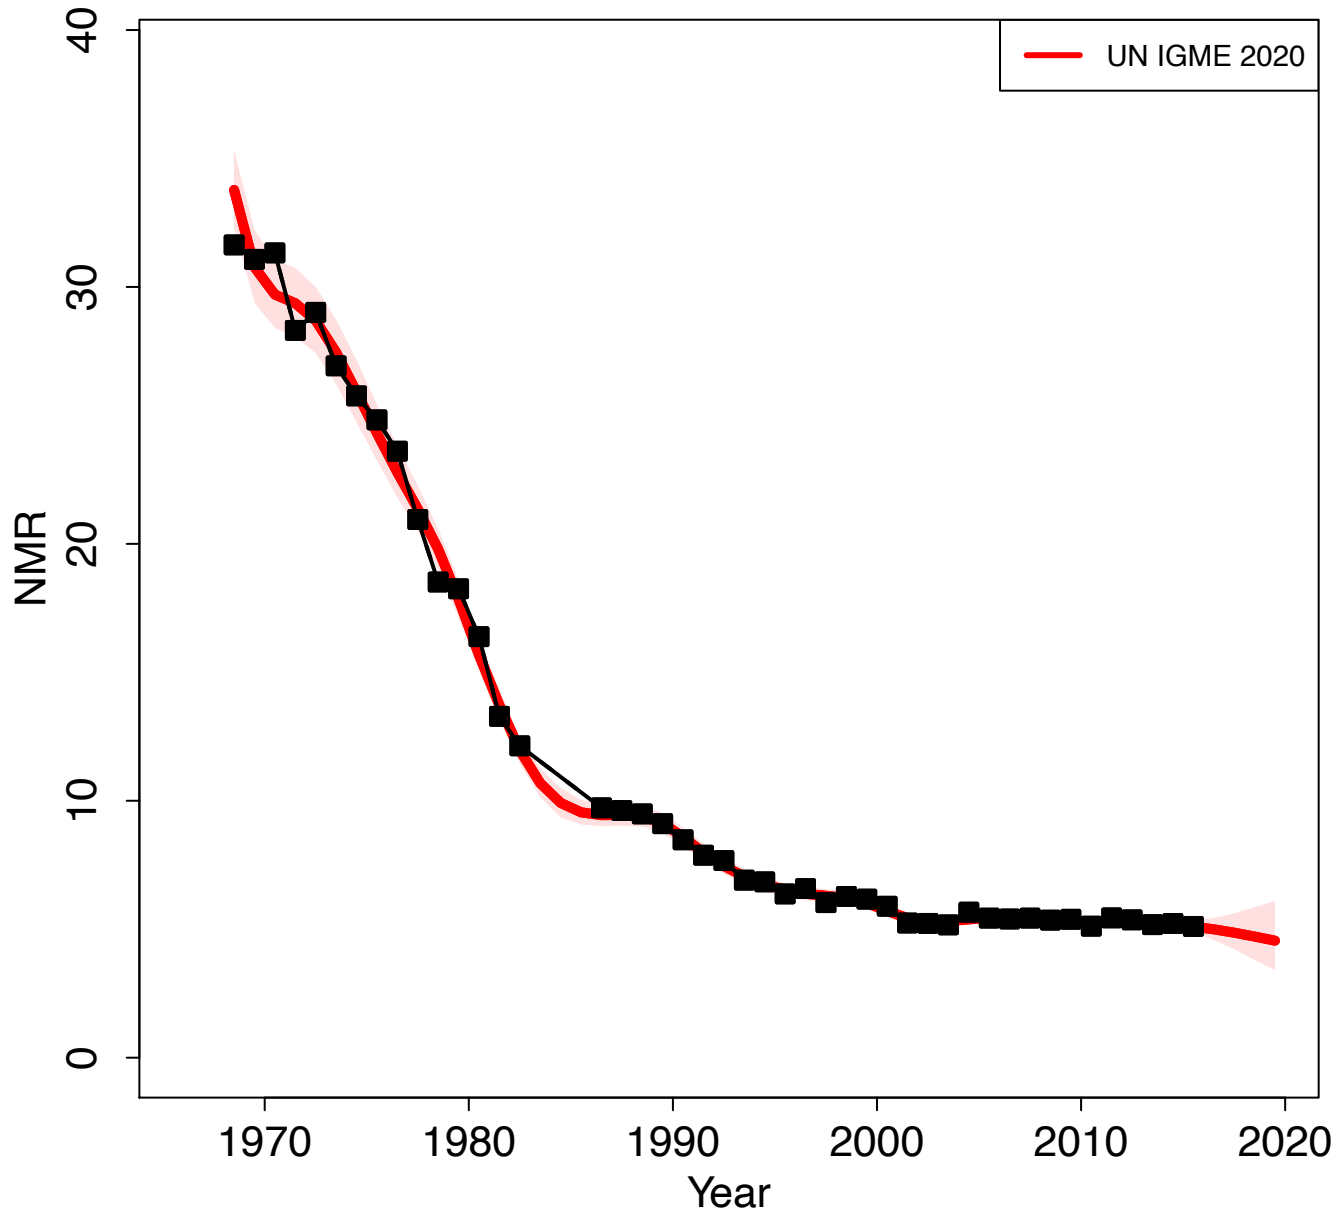

# Zoomed in

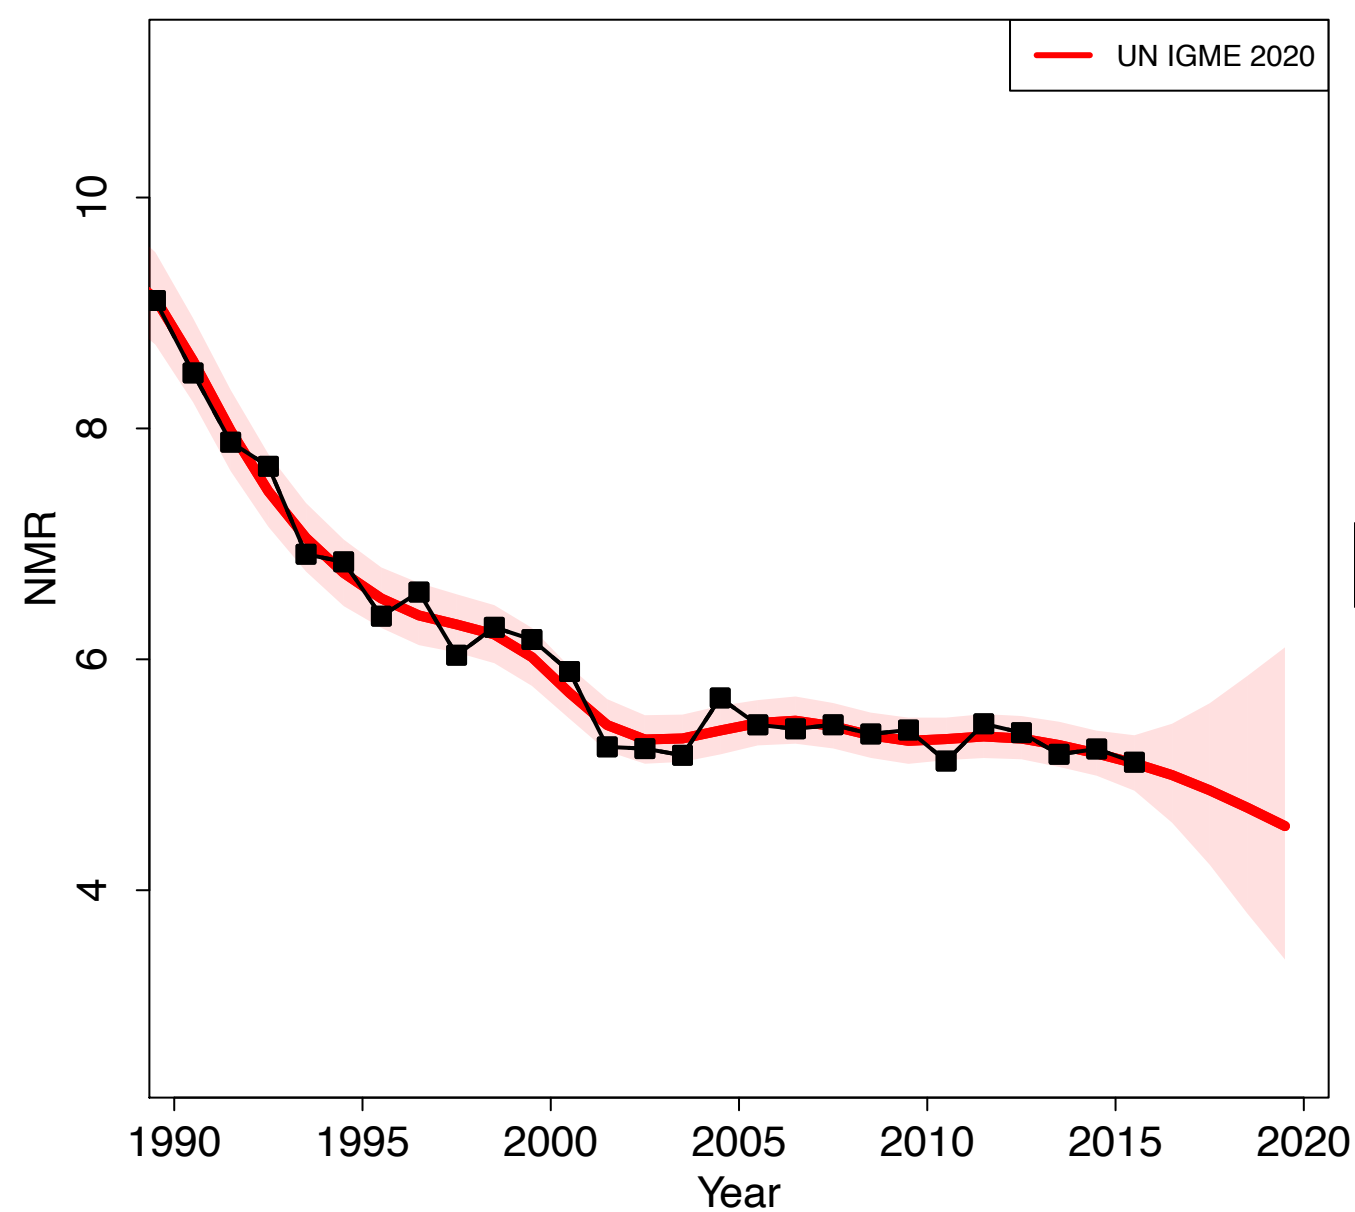



# China

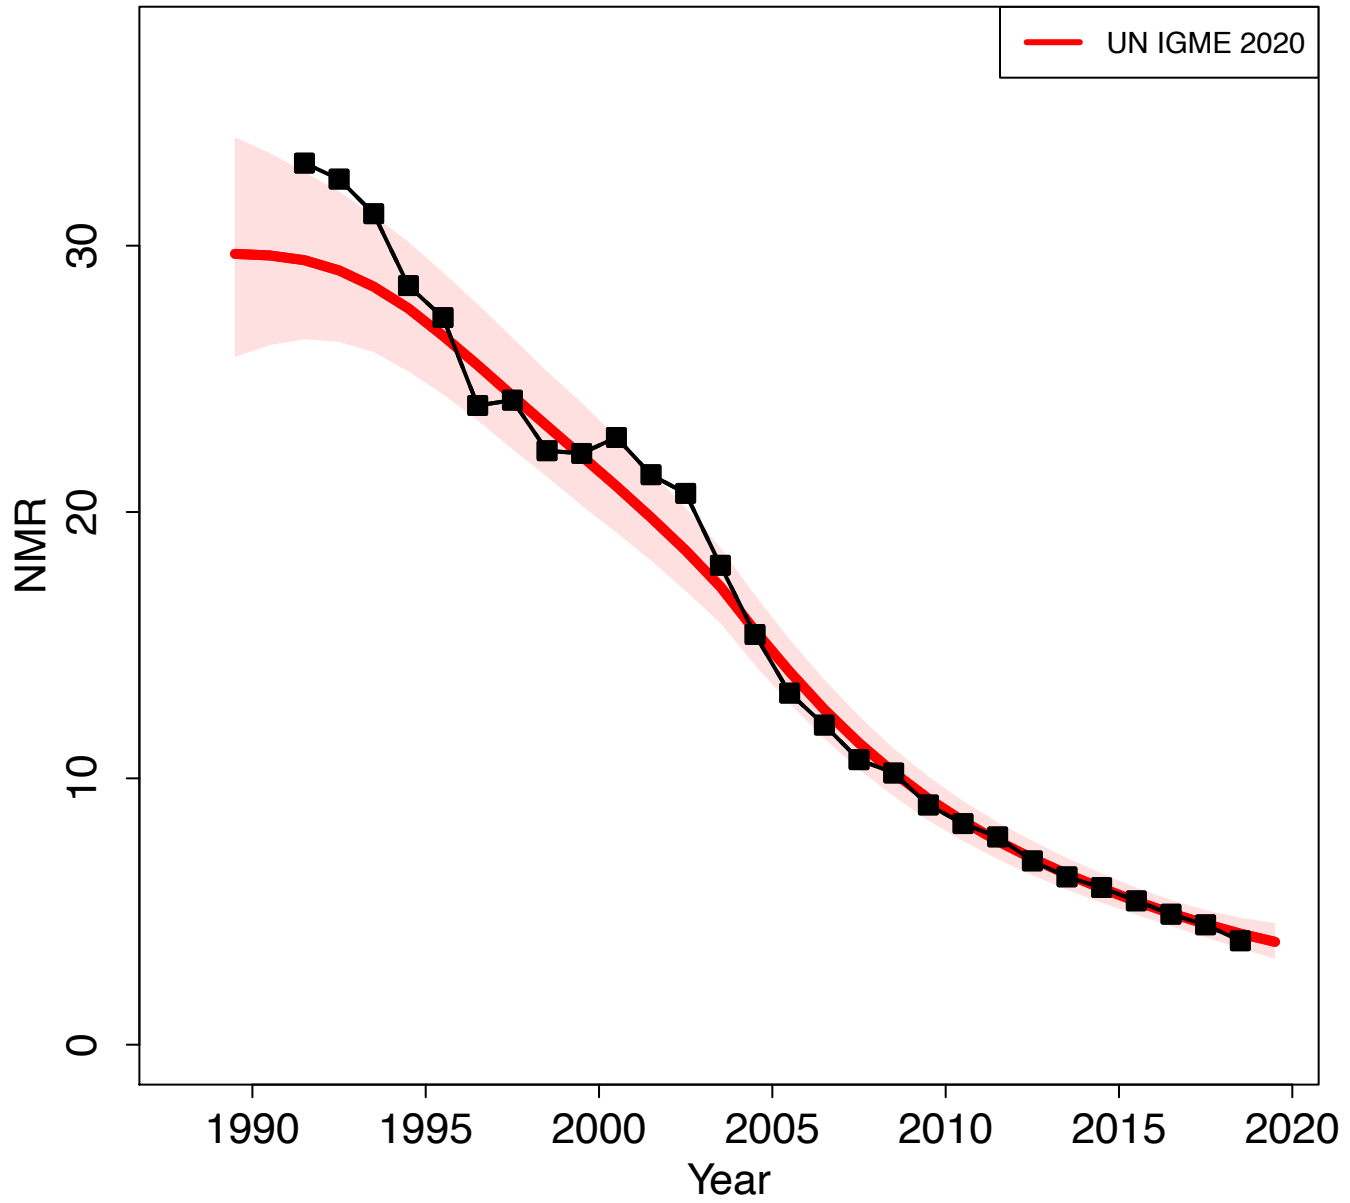

# Zoomed in

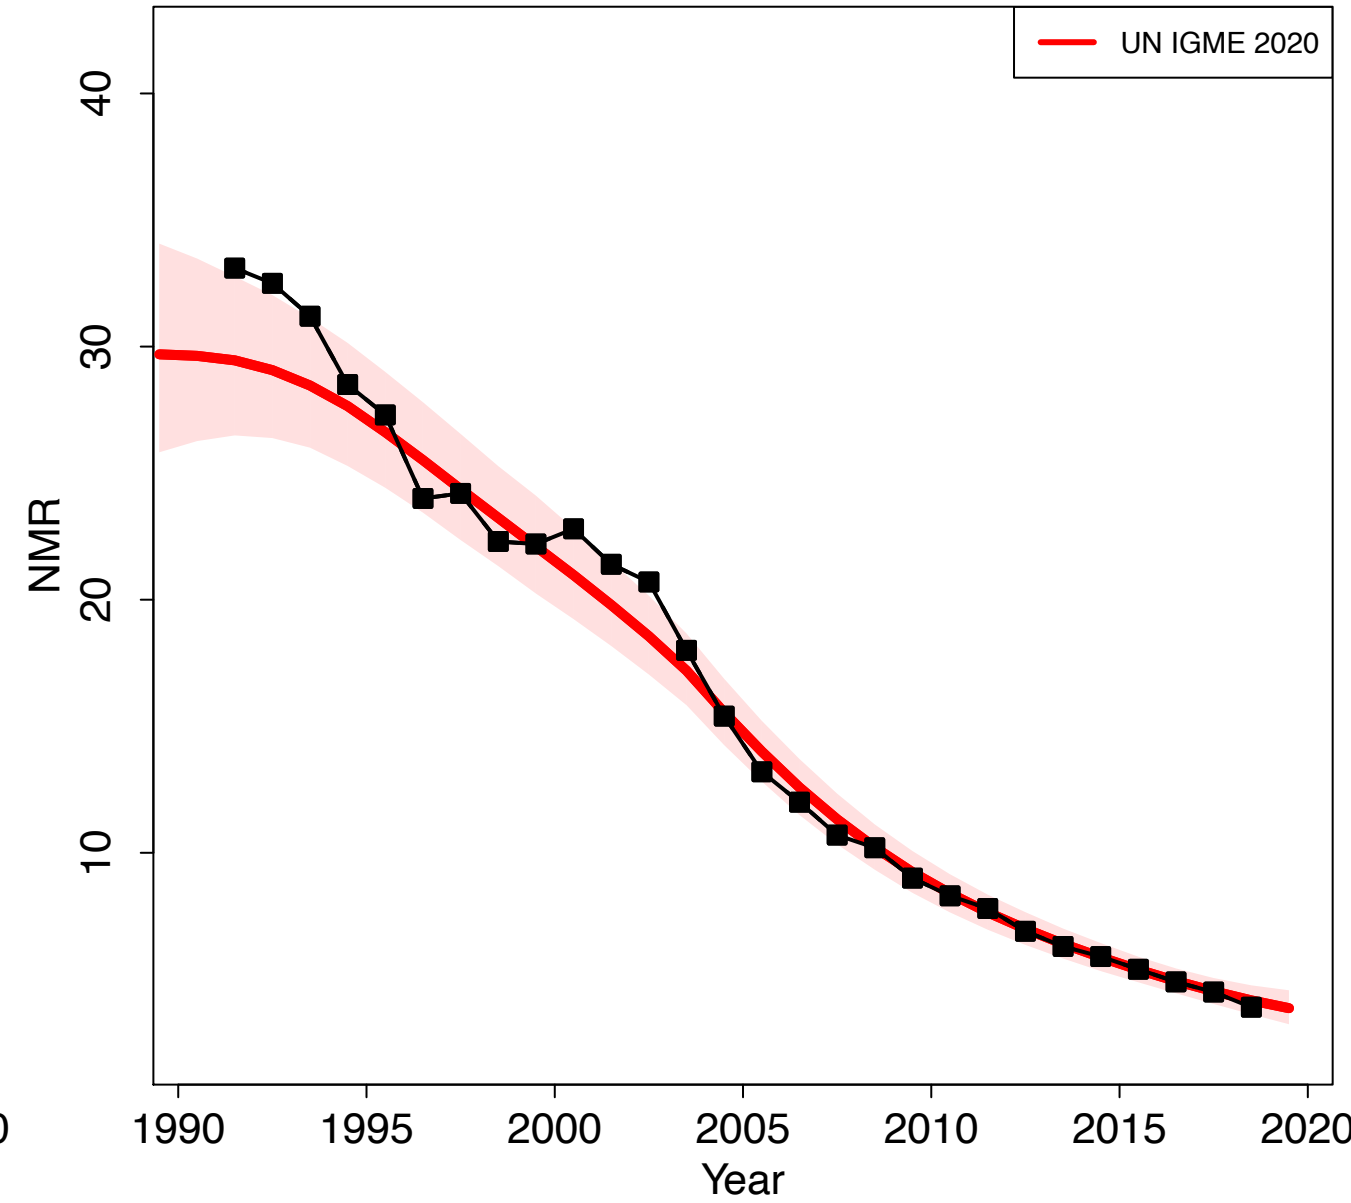

# Colombia

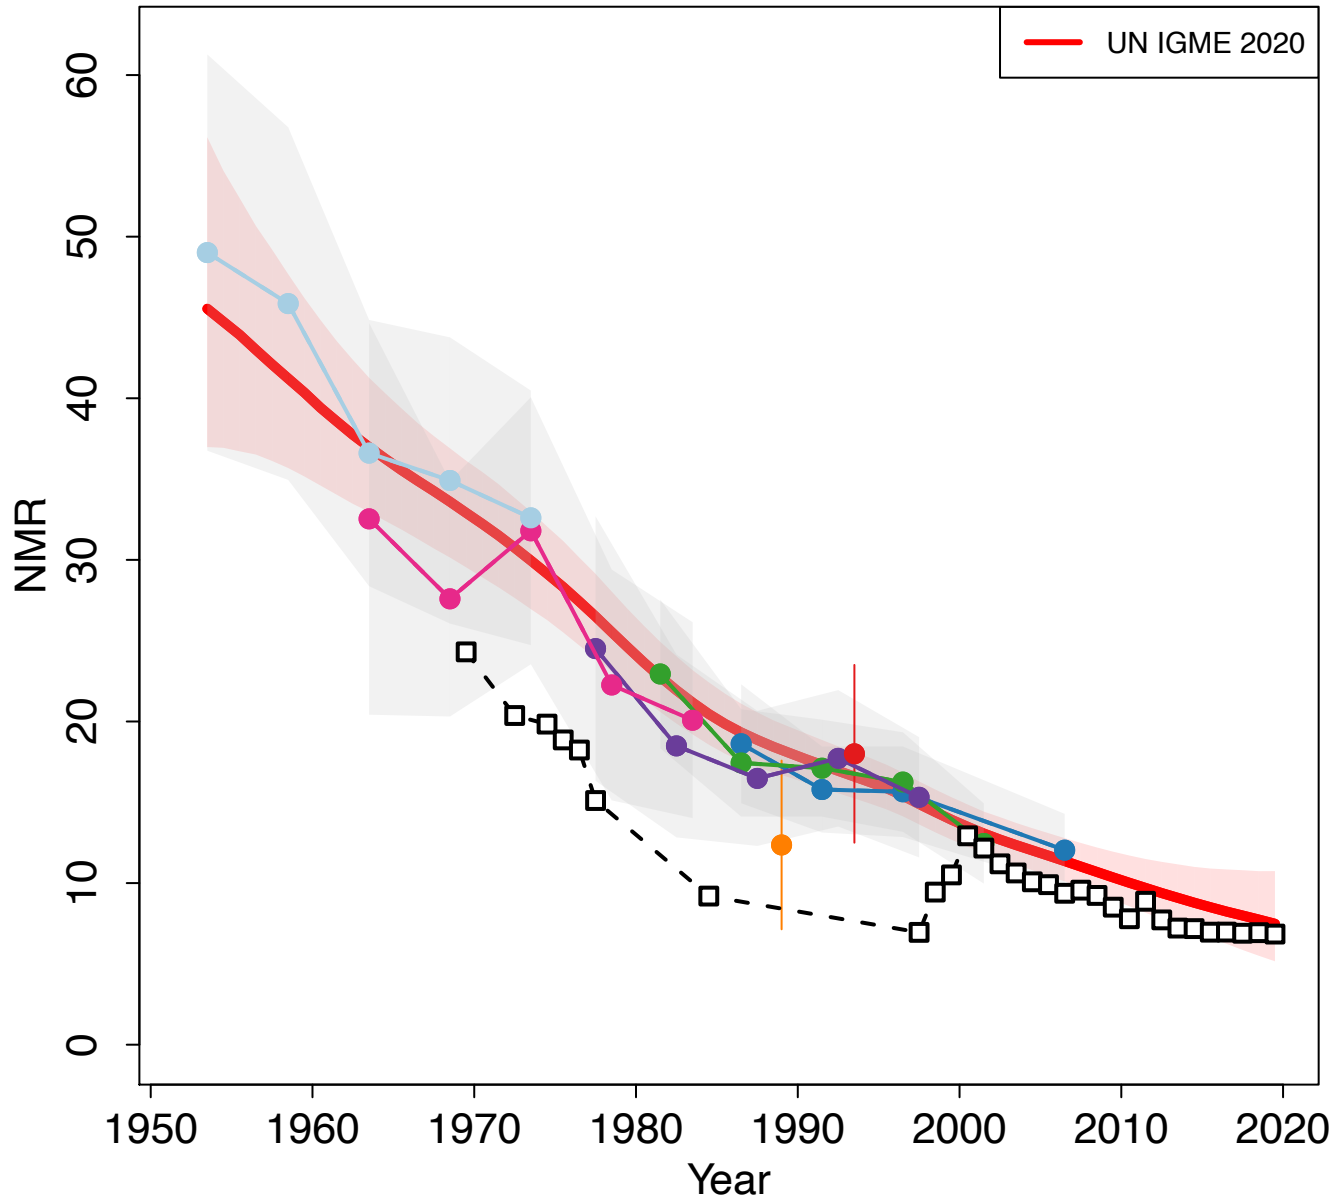

# Zoomed in

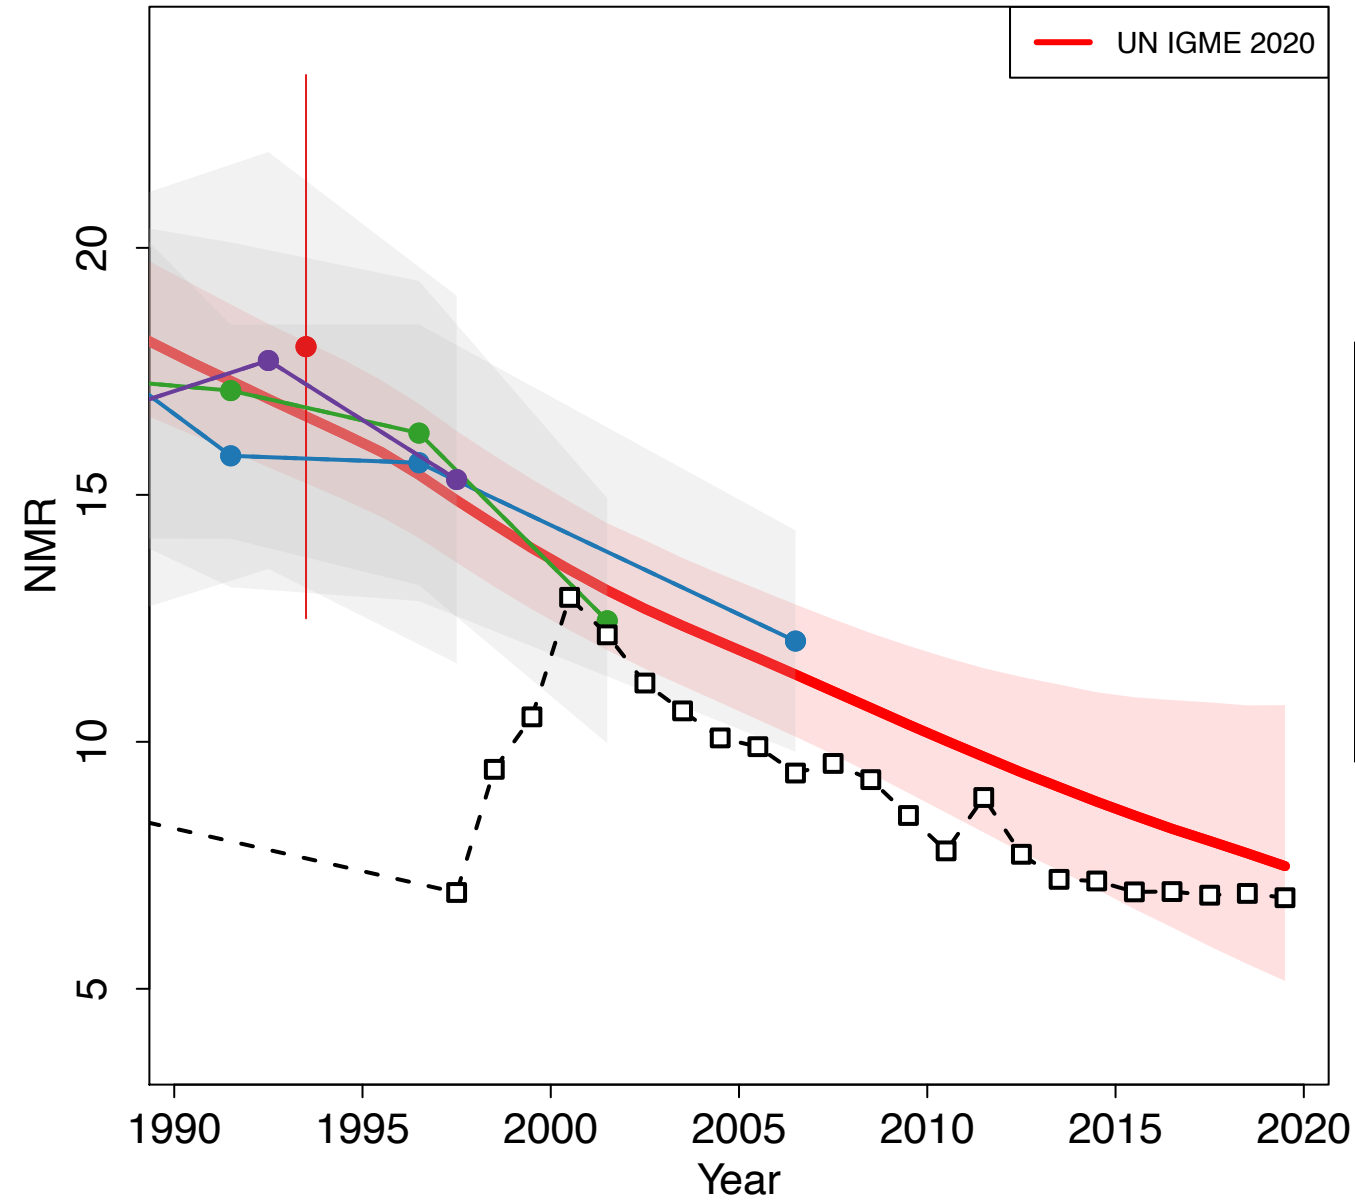

- World Fertility Survey 1976 (Other DHS)
- Demographic and Health Survey 1986 (DHS)
- Demographic and Health Survey 1990 (DHS)
- Demographic and Health Survey 1995 (DHS)
- Demographic and Health Survey 2000 (DHS)
- Demographic and Health Survey 2005 (DHS)
- Demographic and Health Survey 2010 (DHS)
- VR WHO

# Comoros

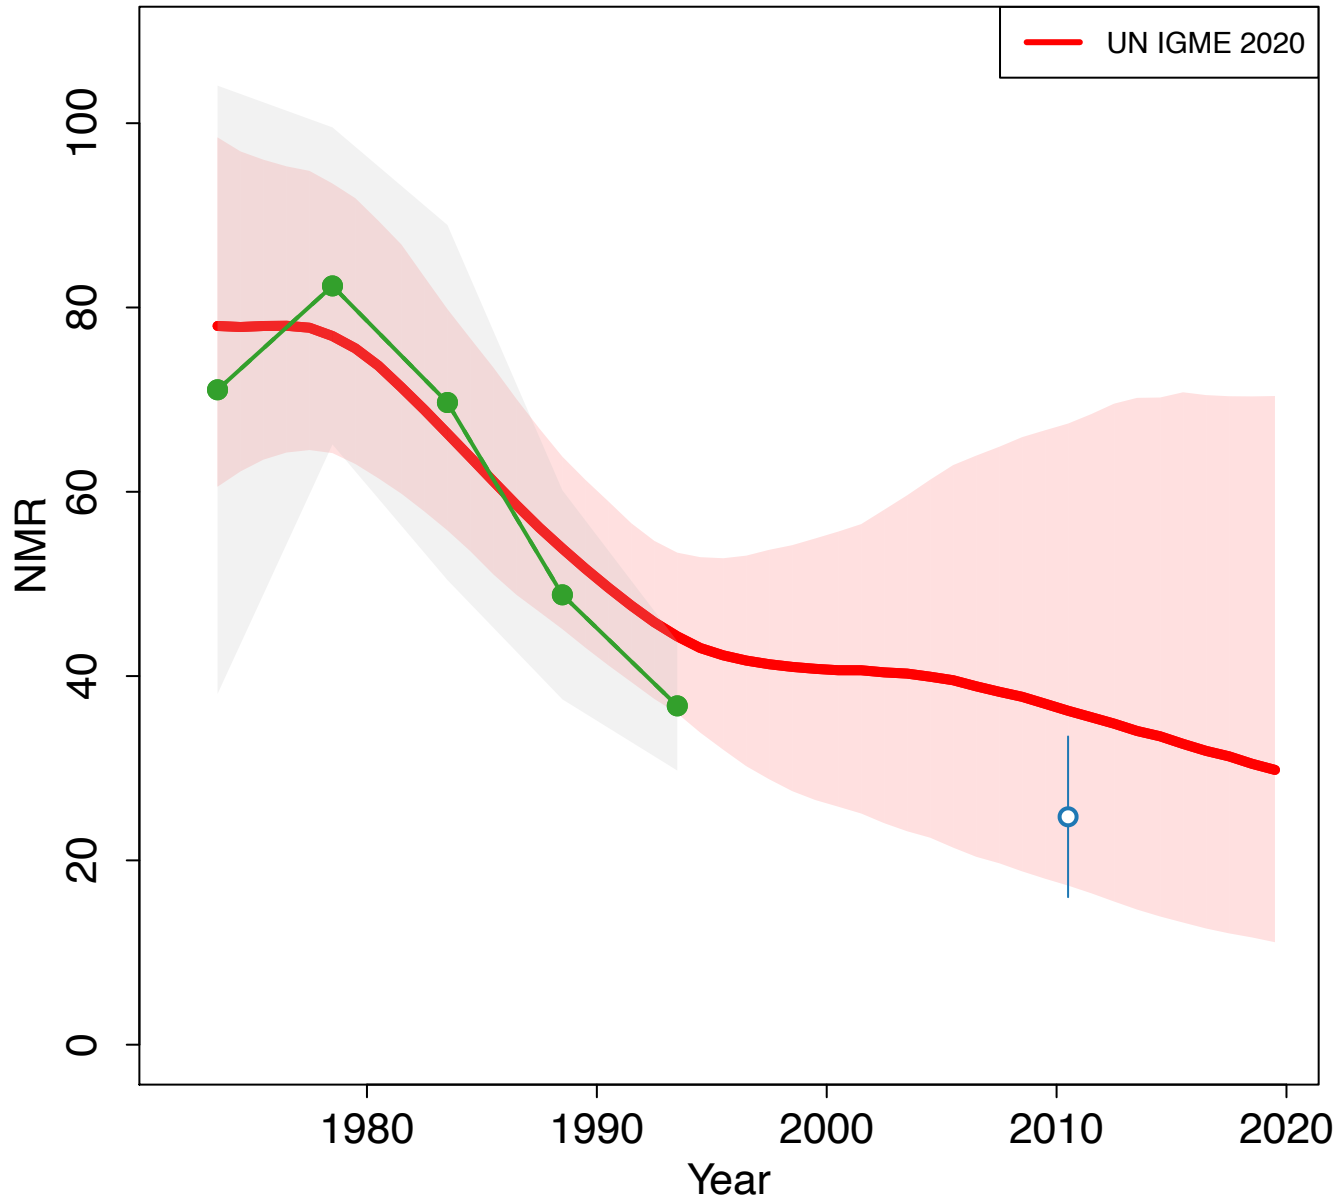

# Zoomed in

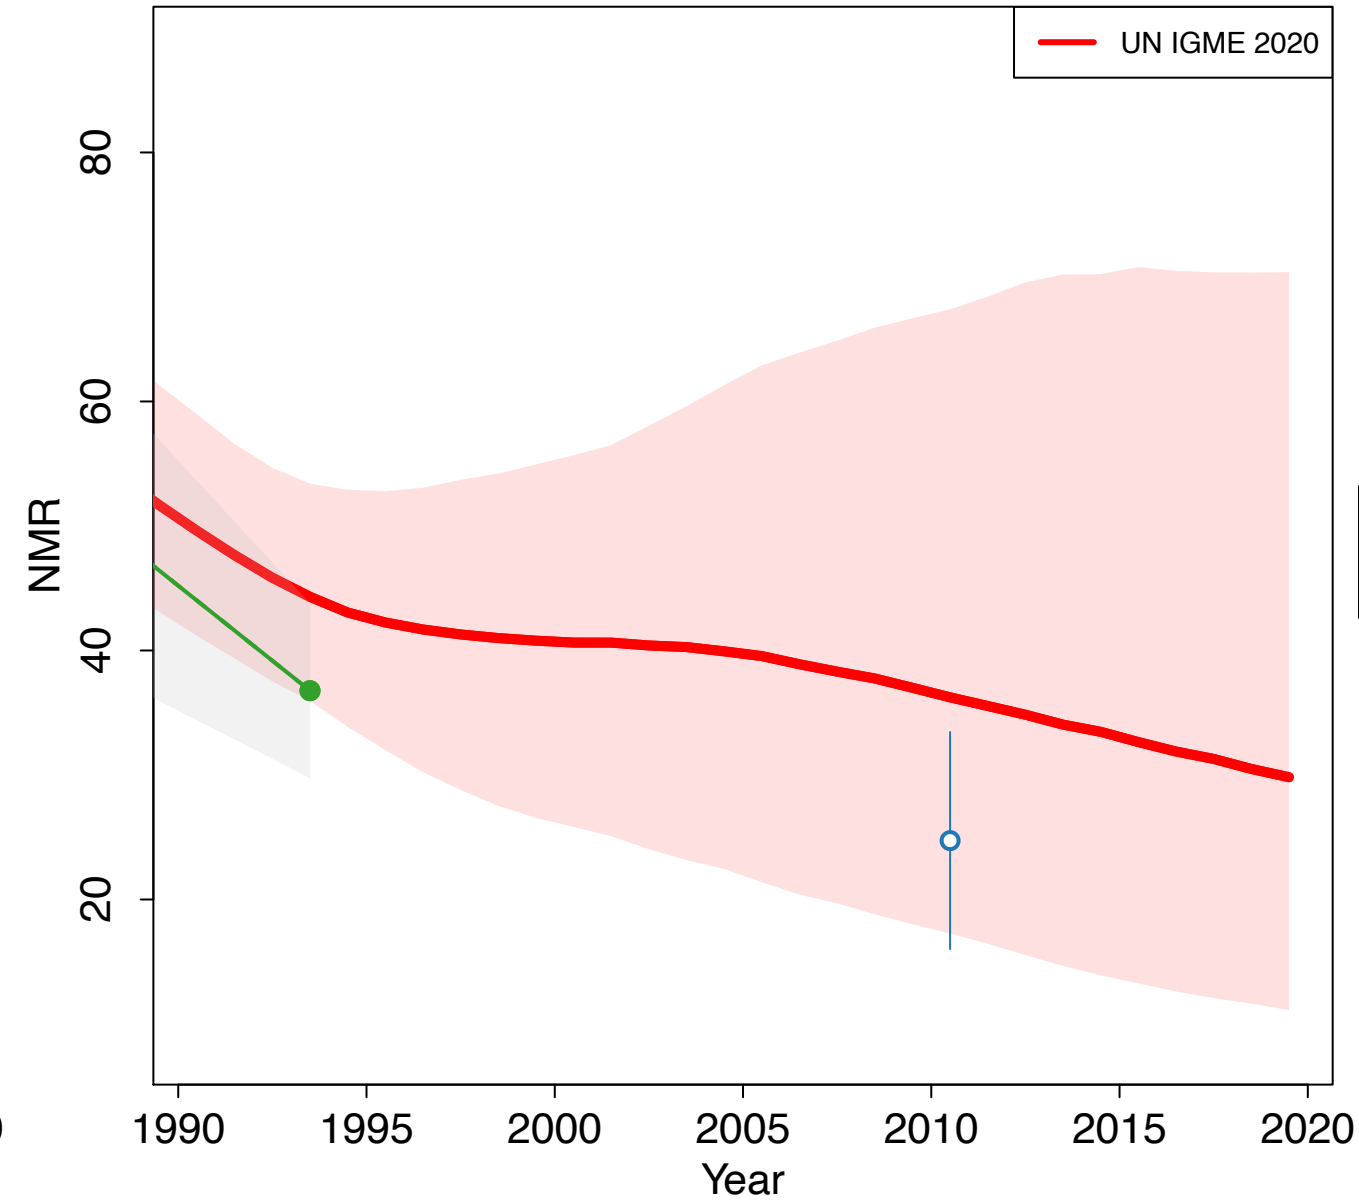

# Congo

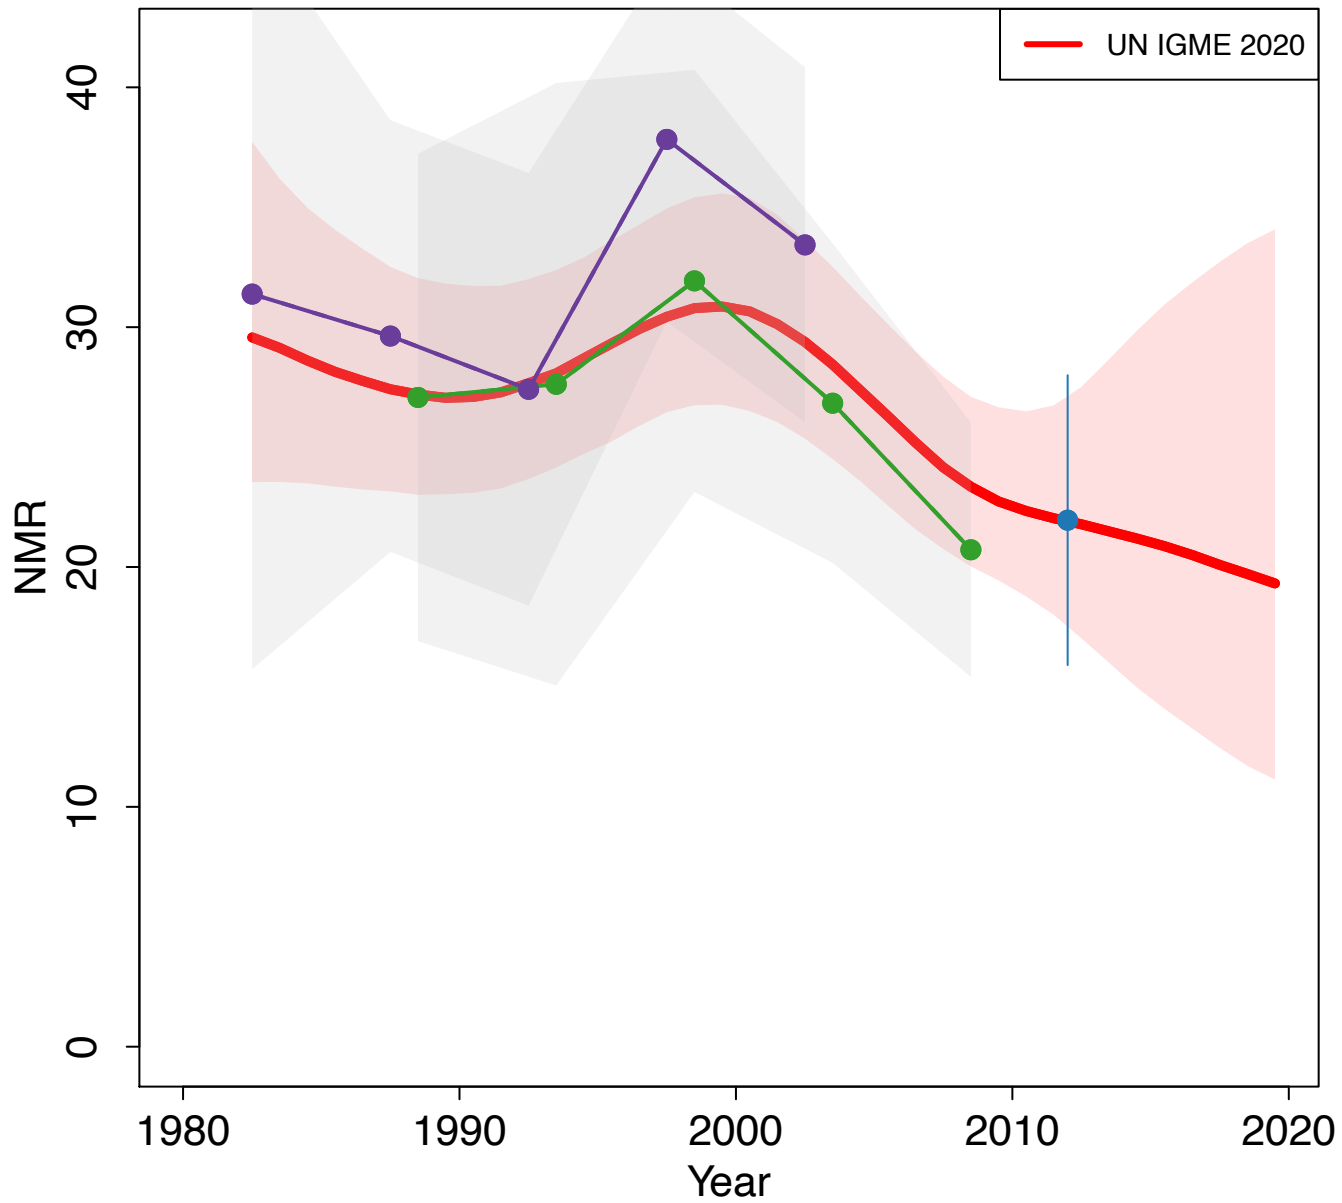

# Zoomed in

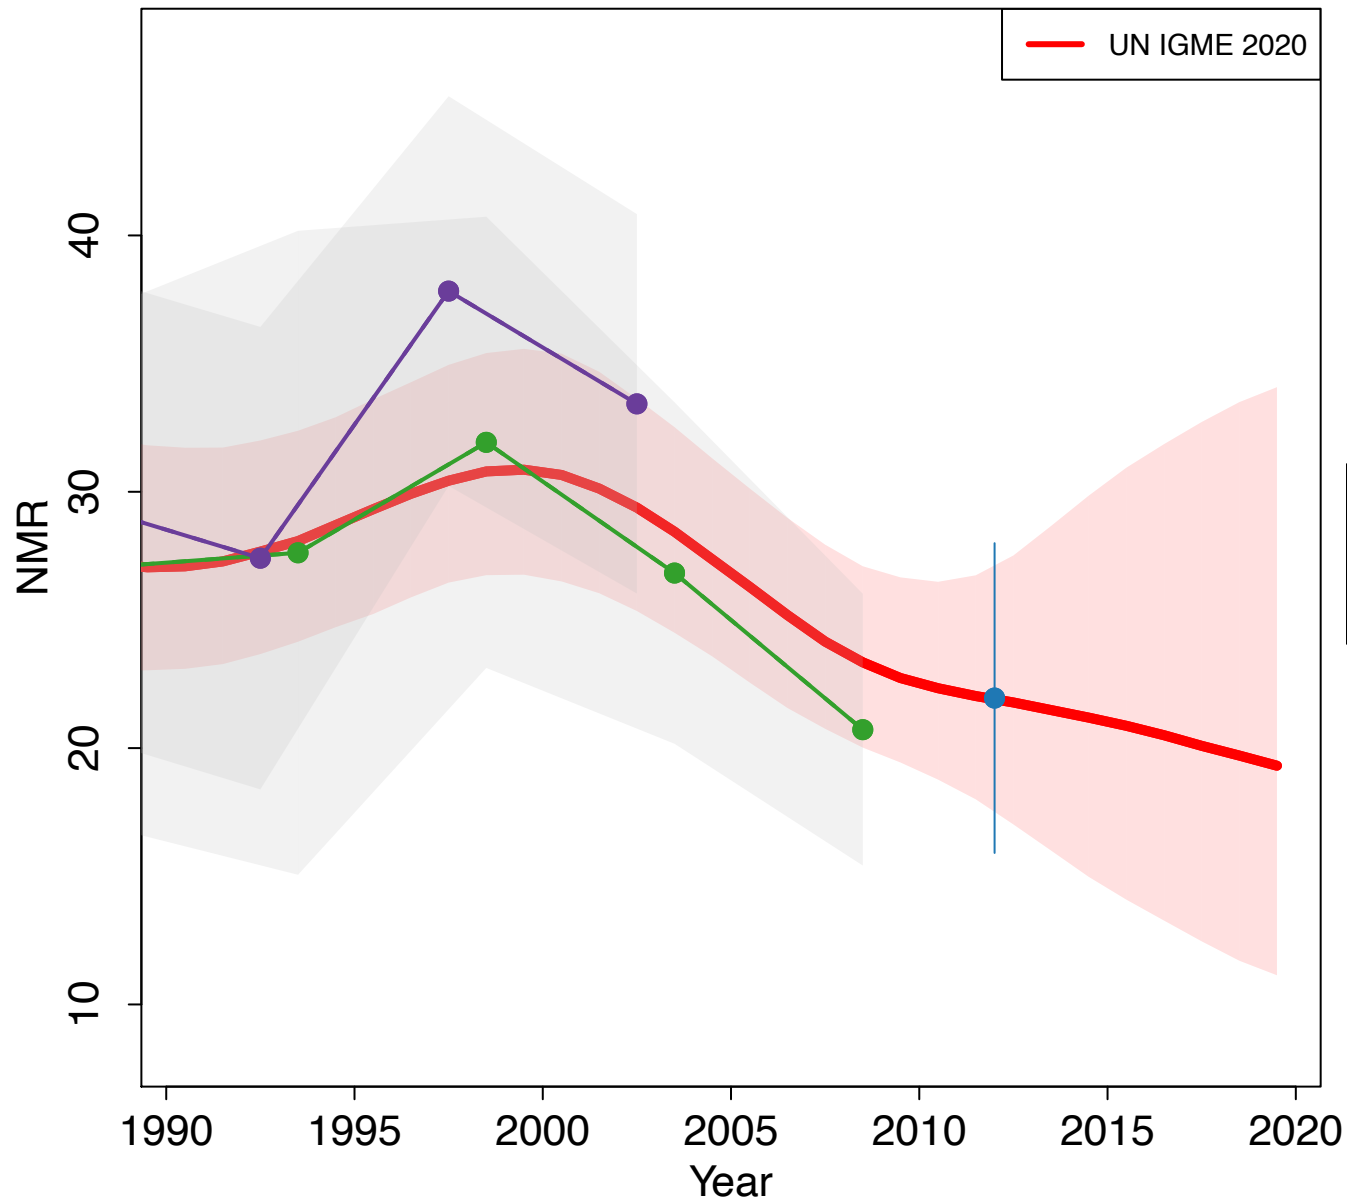

- Demographic and Health Survey 2005 (DHS)
- Demographic and Health Survey 2011-2012 (DHS)
- Multiple Indicator Cluster Survey 2014-2015 (MICS)

# Democratic Republic of the Congo

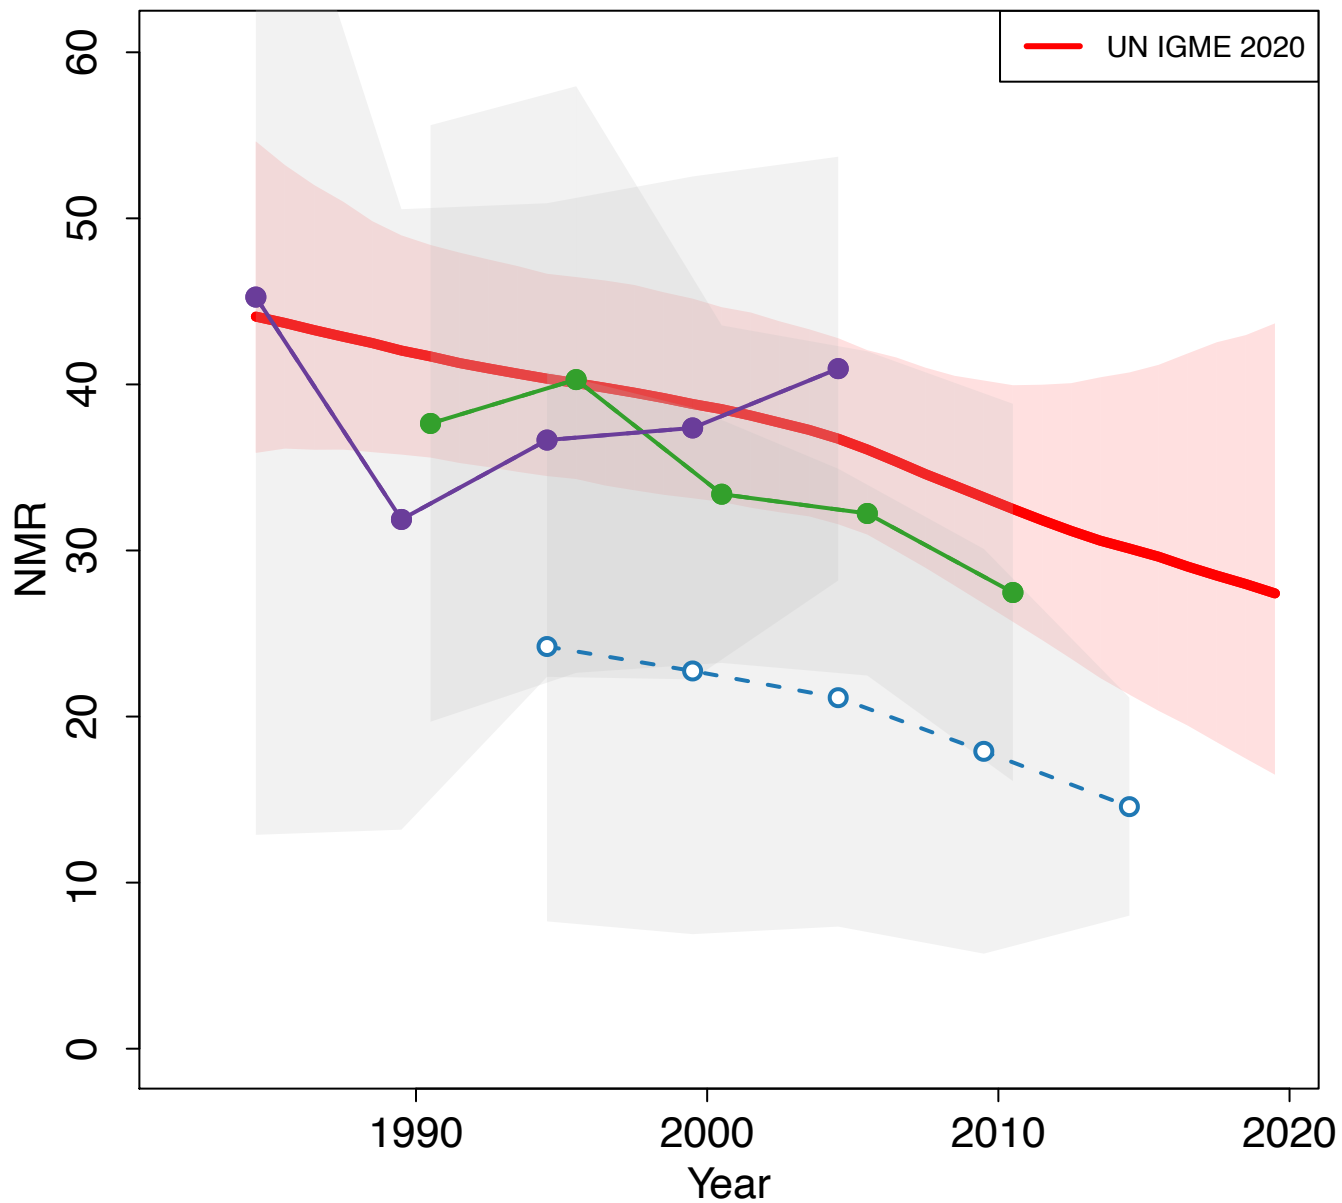

# Zoomed in

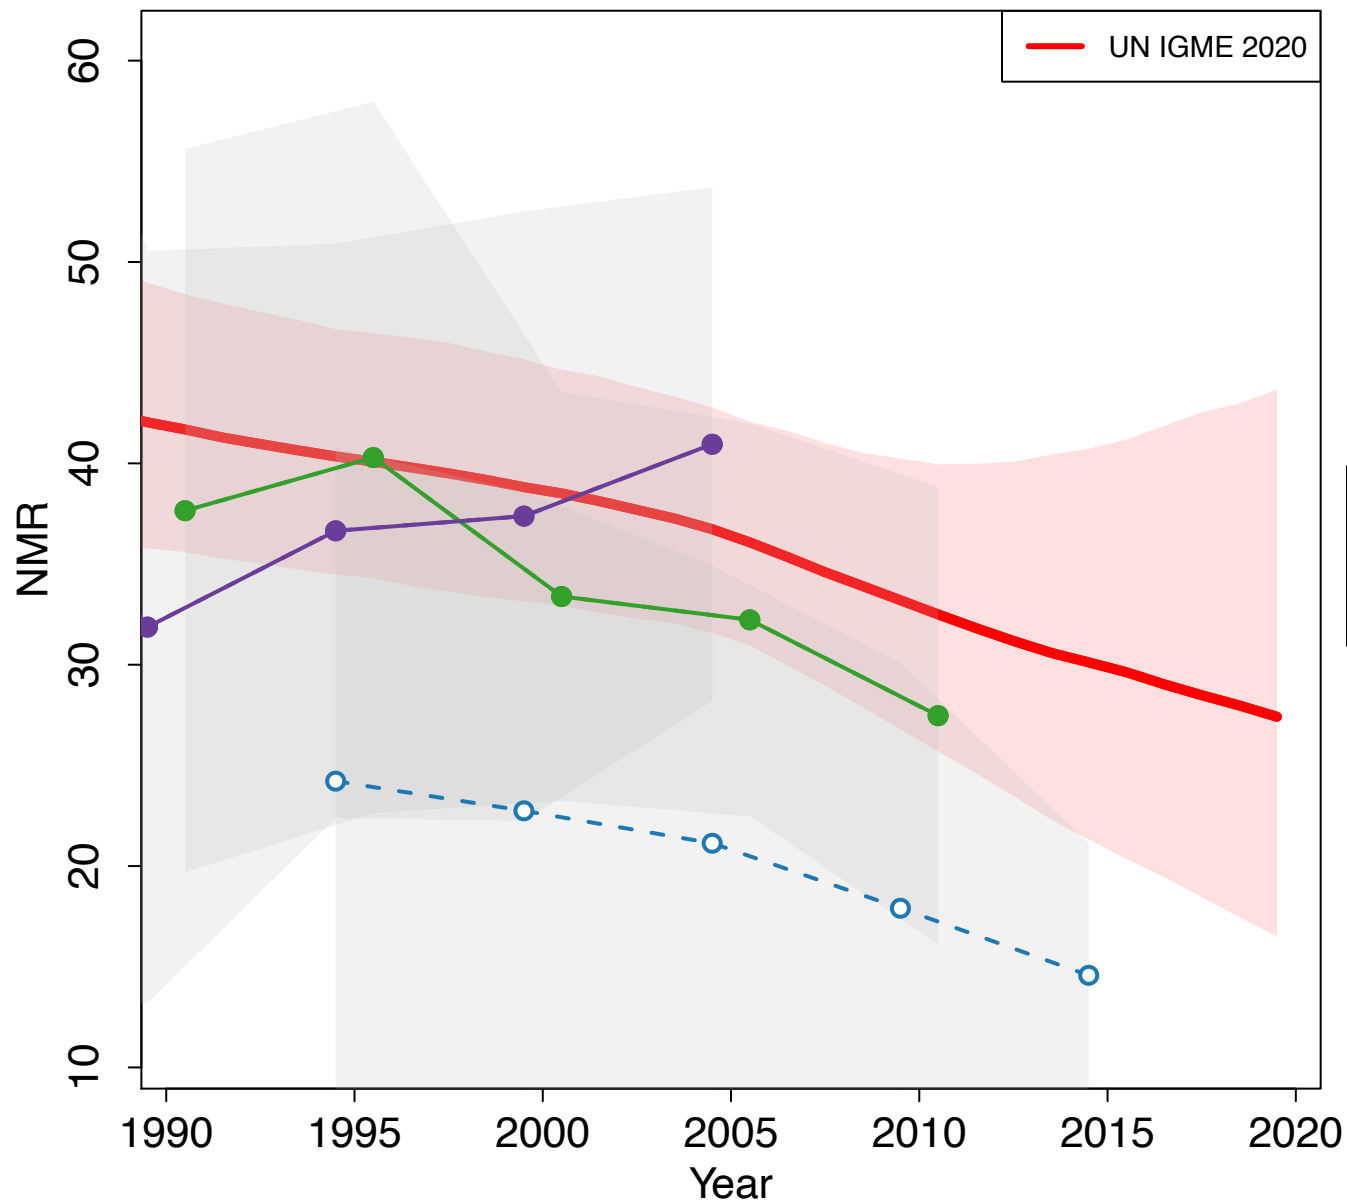

# Cook Islands

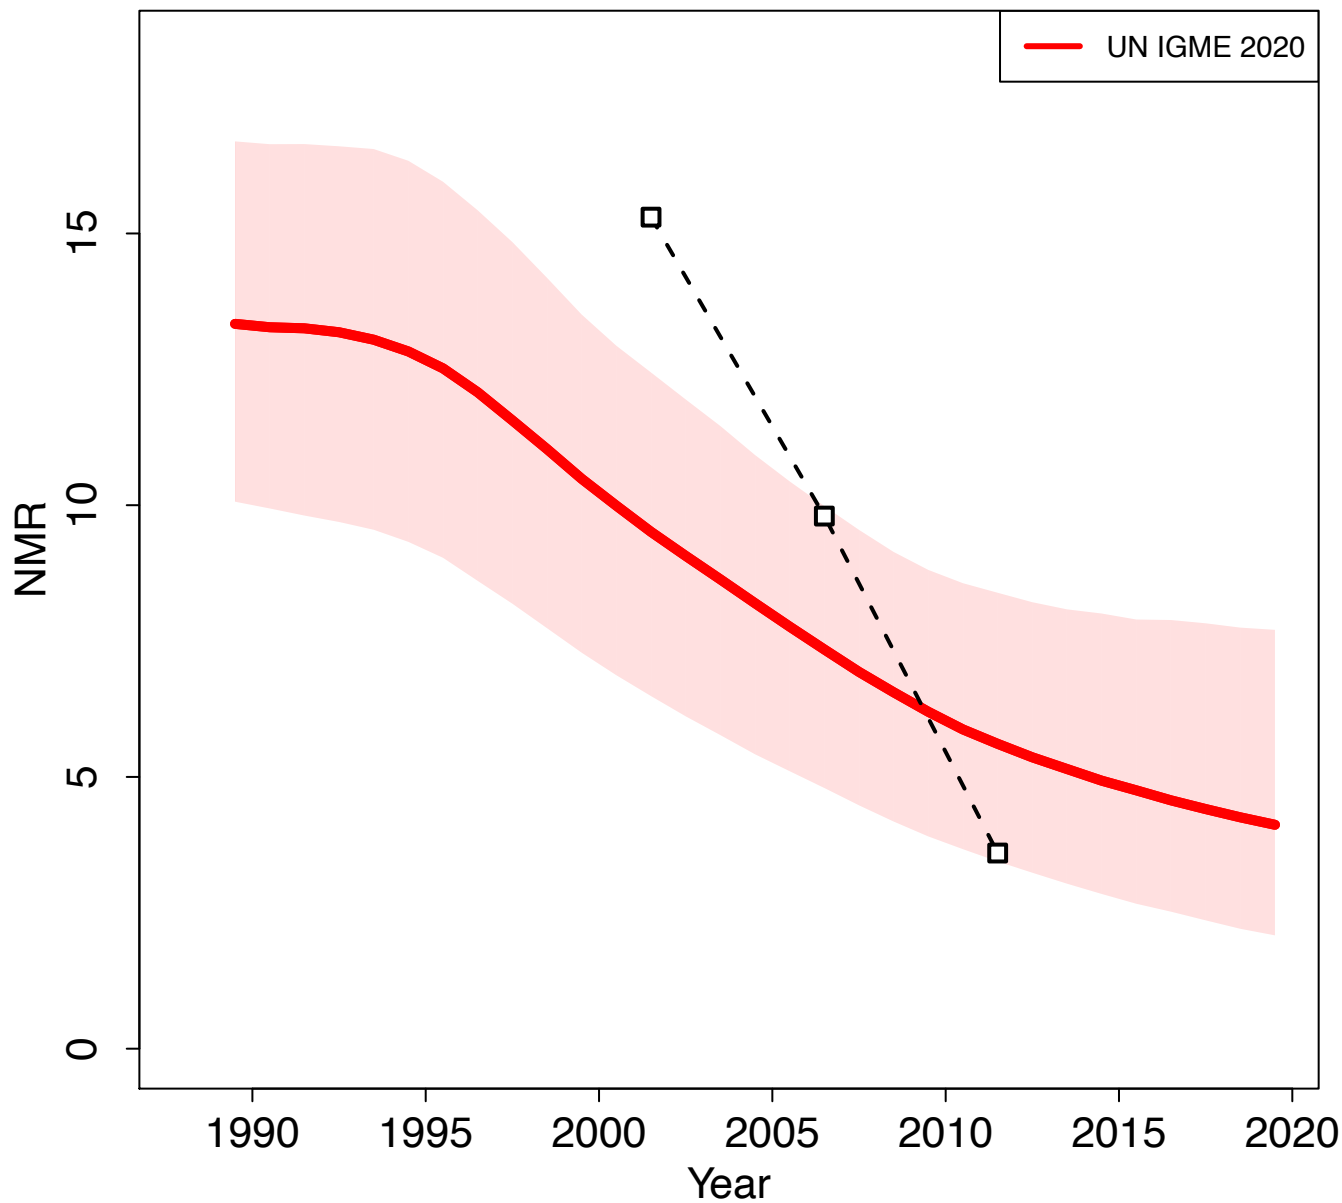

# Zoomed in

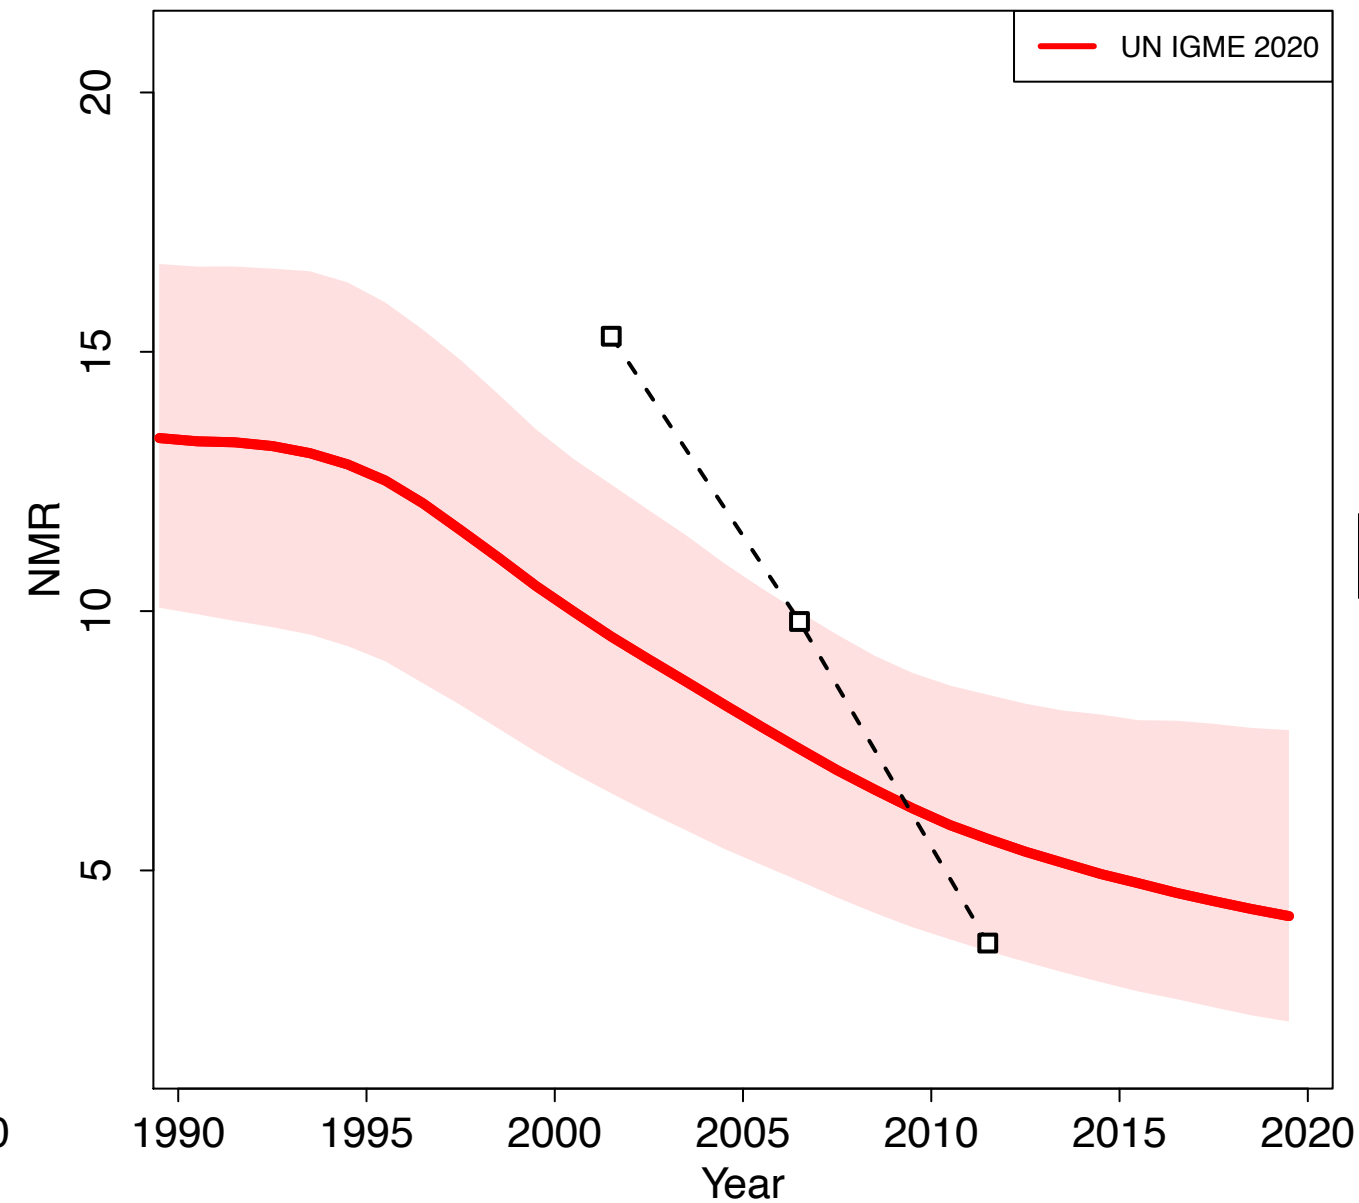

# Costa Rica

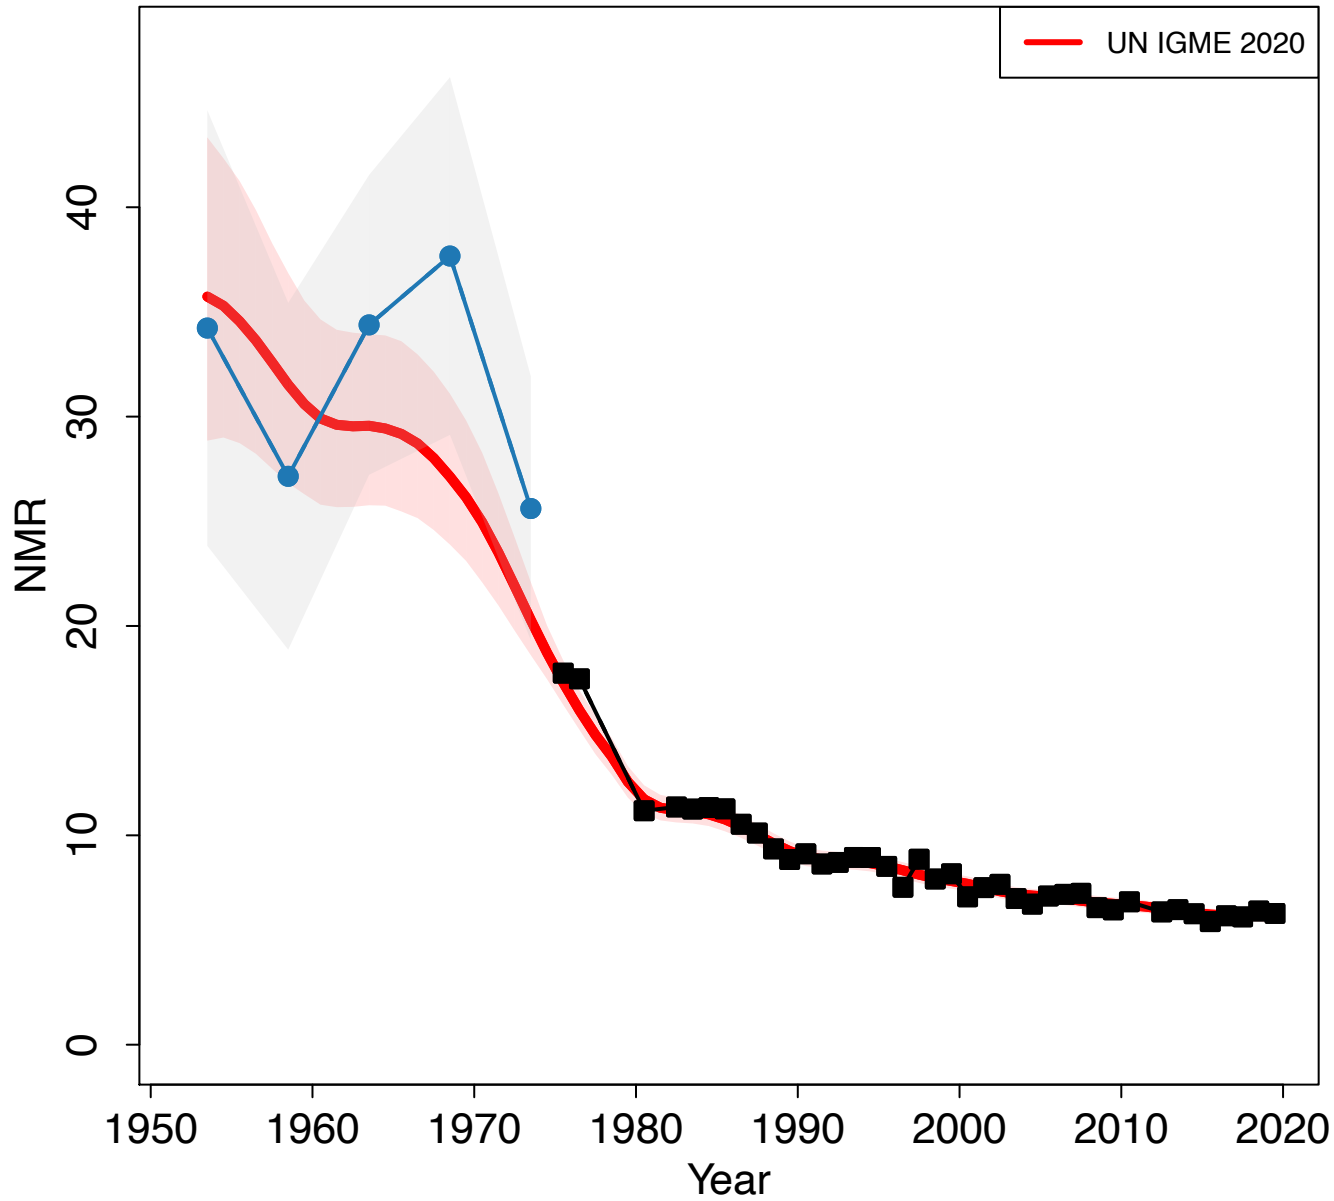

# Zoomed in

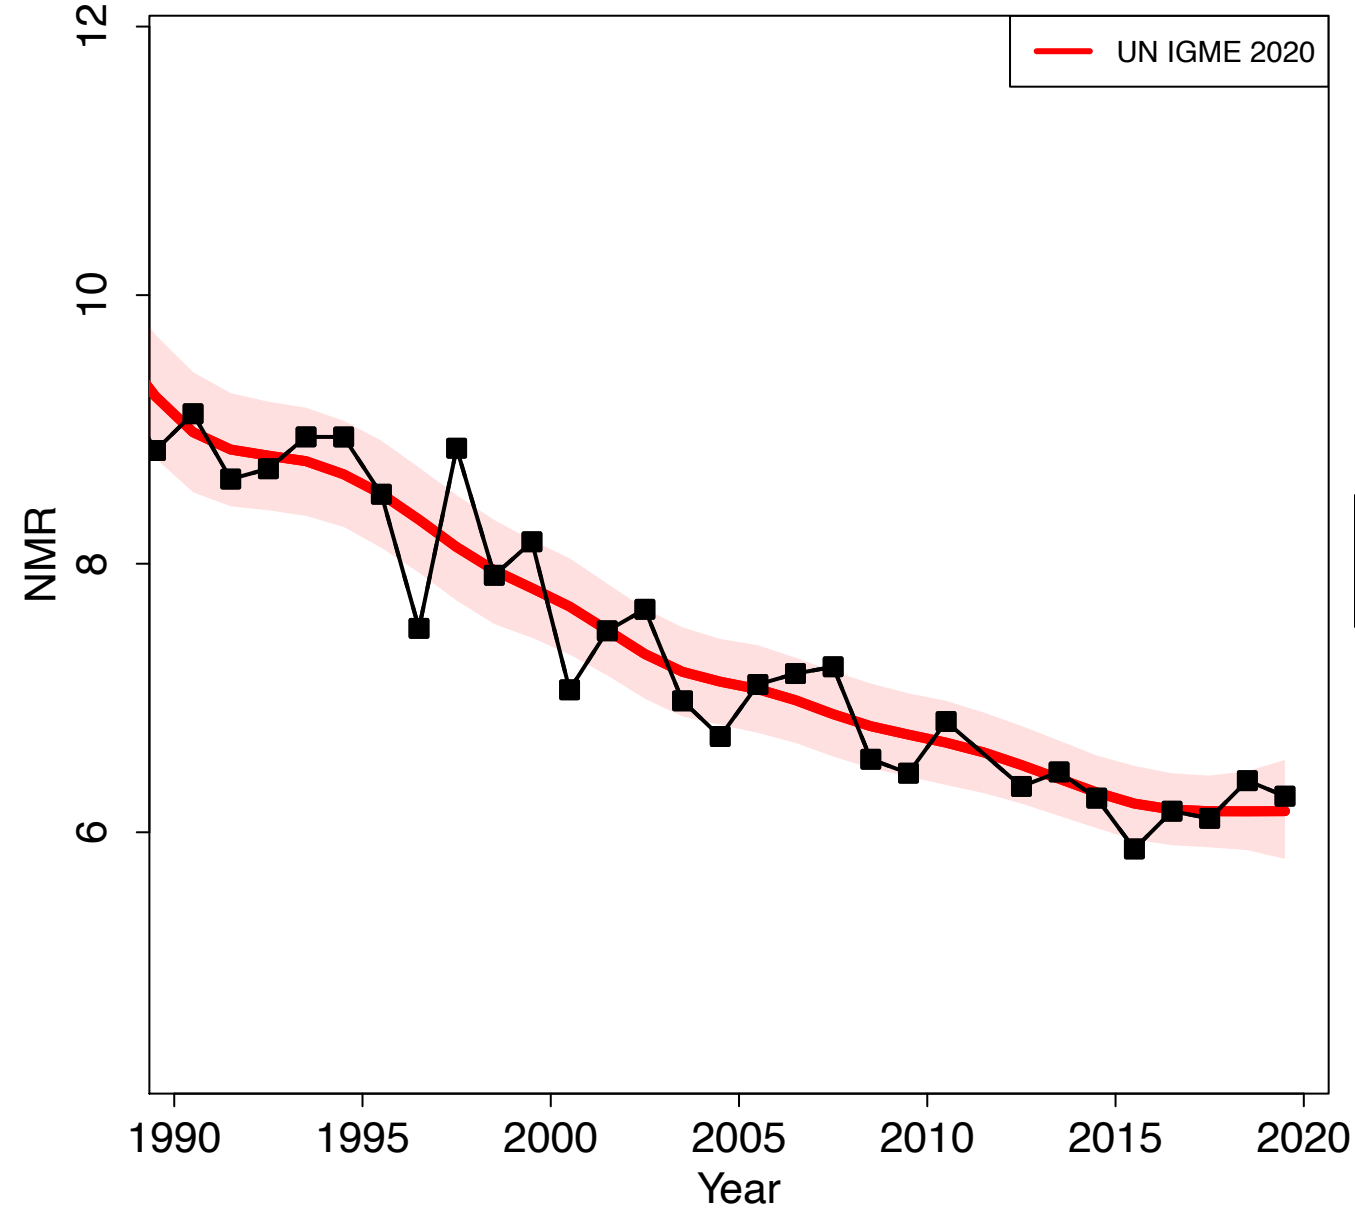

# Cote d'Ivoire

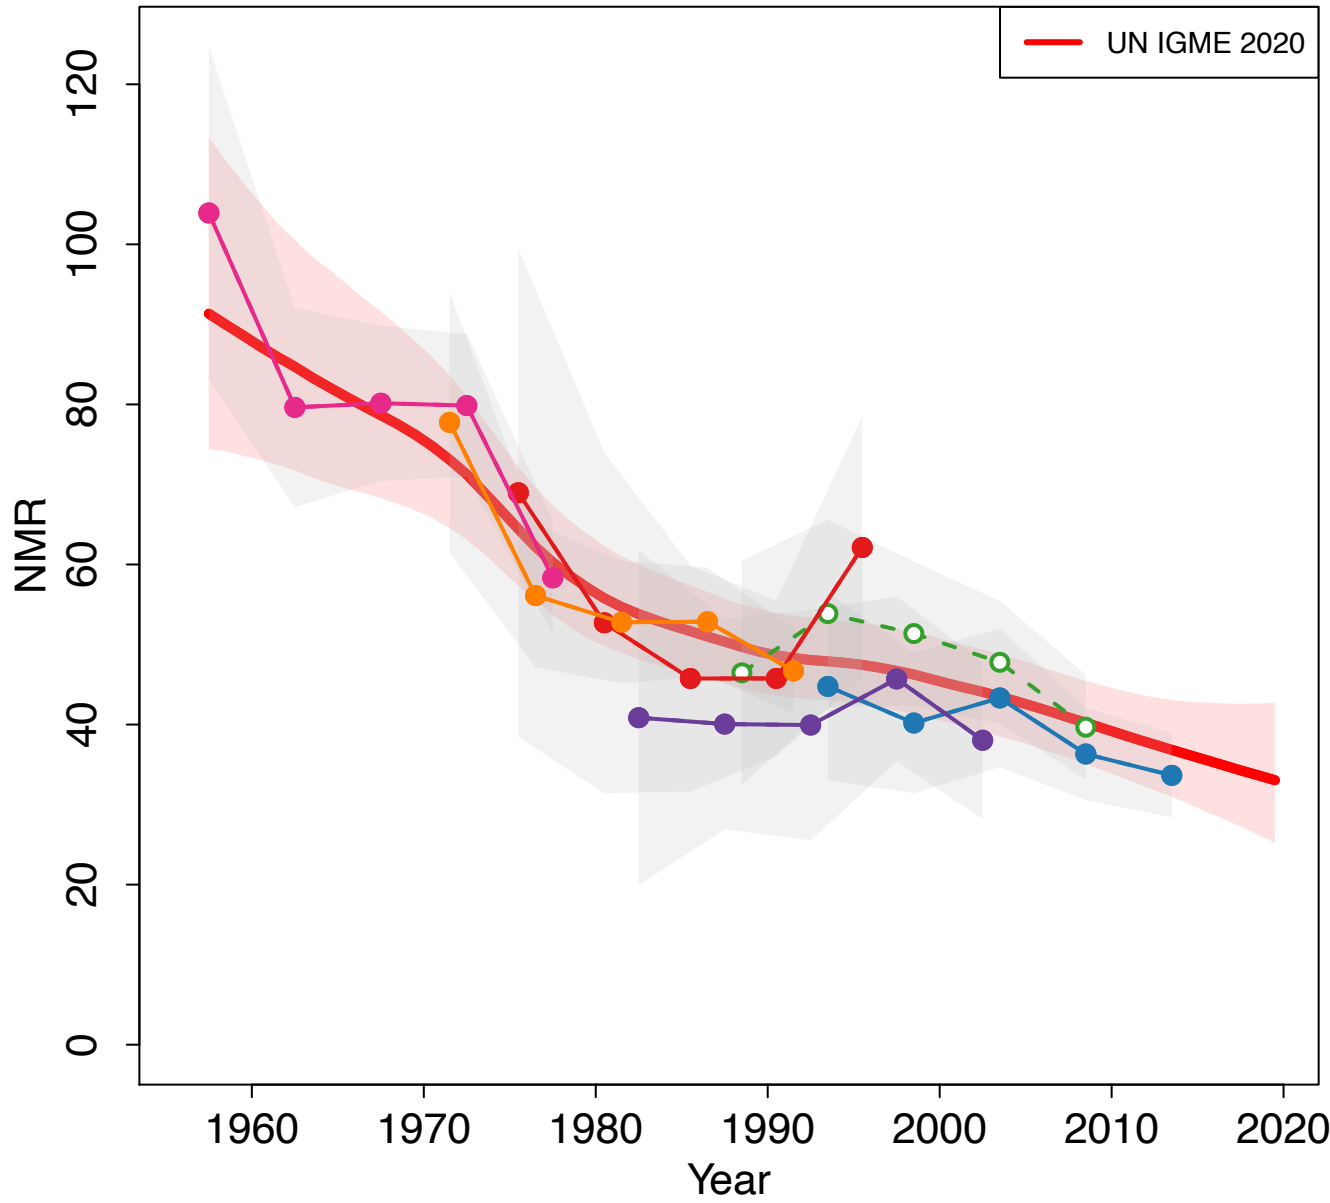

# Zoomed in

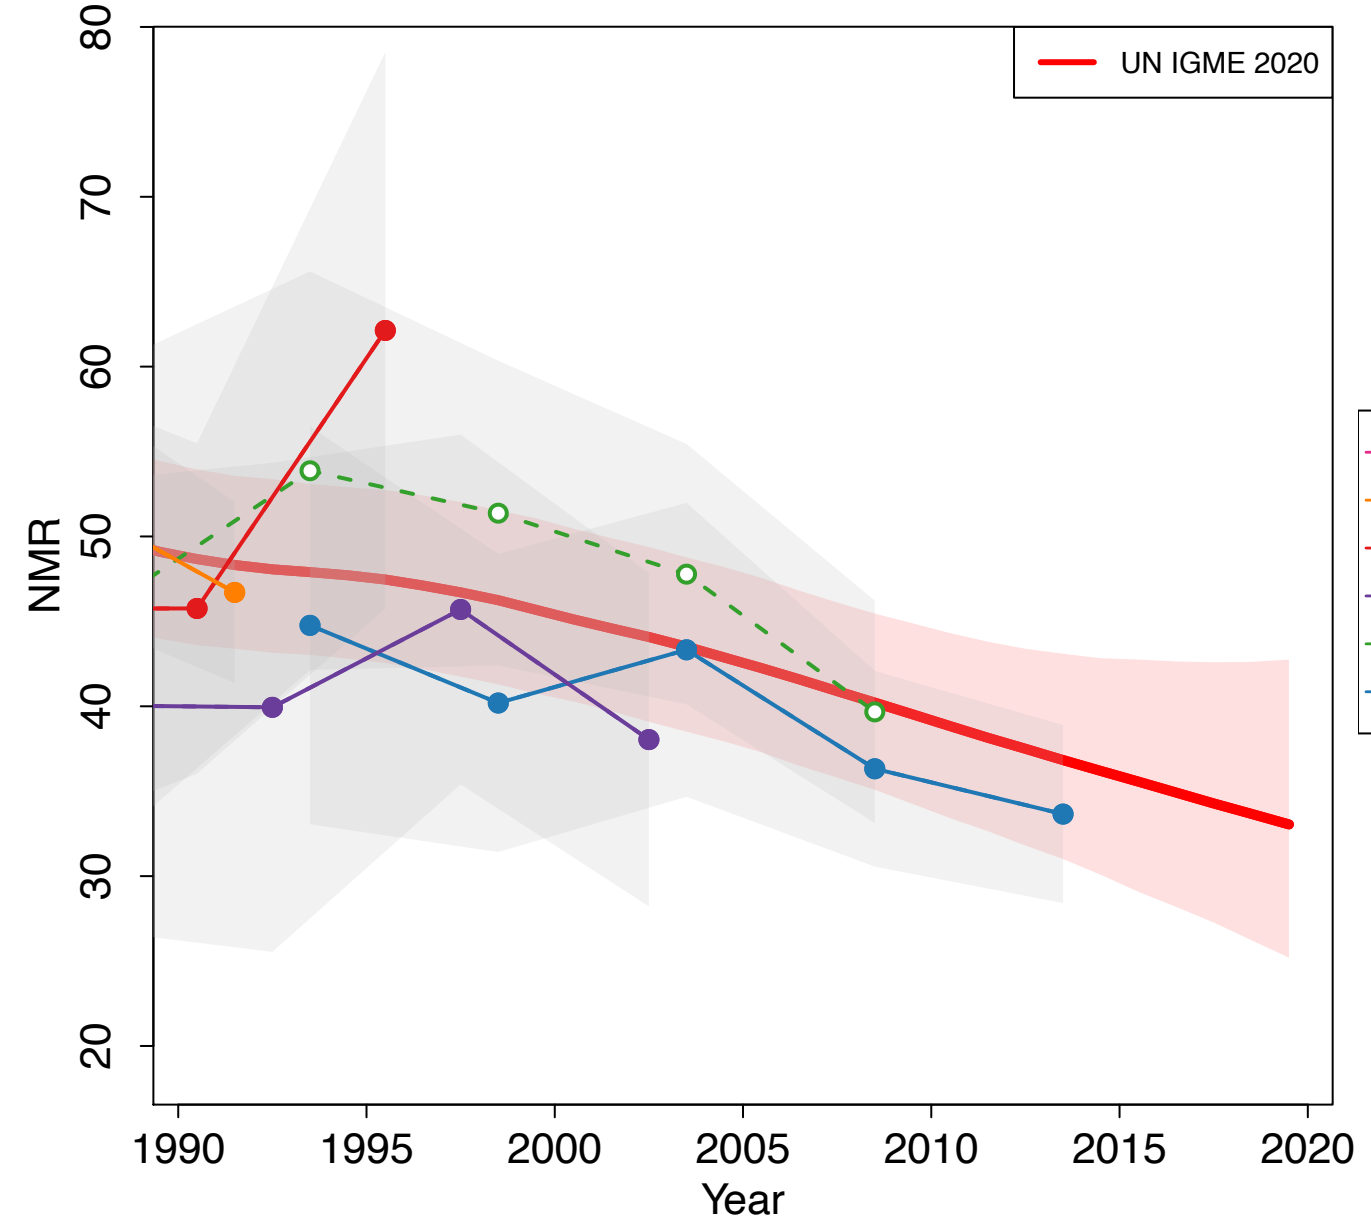

- World Fertility Survey 1980–1981 (Other DHS)
- Demographic and Health Survey 1994 (DHS)
- Demographic and Health Survey 1998–1999 (DHS)
- AIDS Indicator Survey 2005 (Other DHS)
- Demographic and Health Survey 2011–2012 (DHS)
- Multiple Indicator Cluster Survey 2016 (MICS)



# Croatia

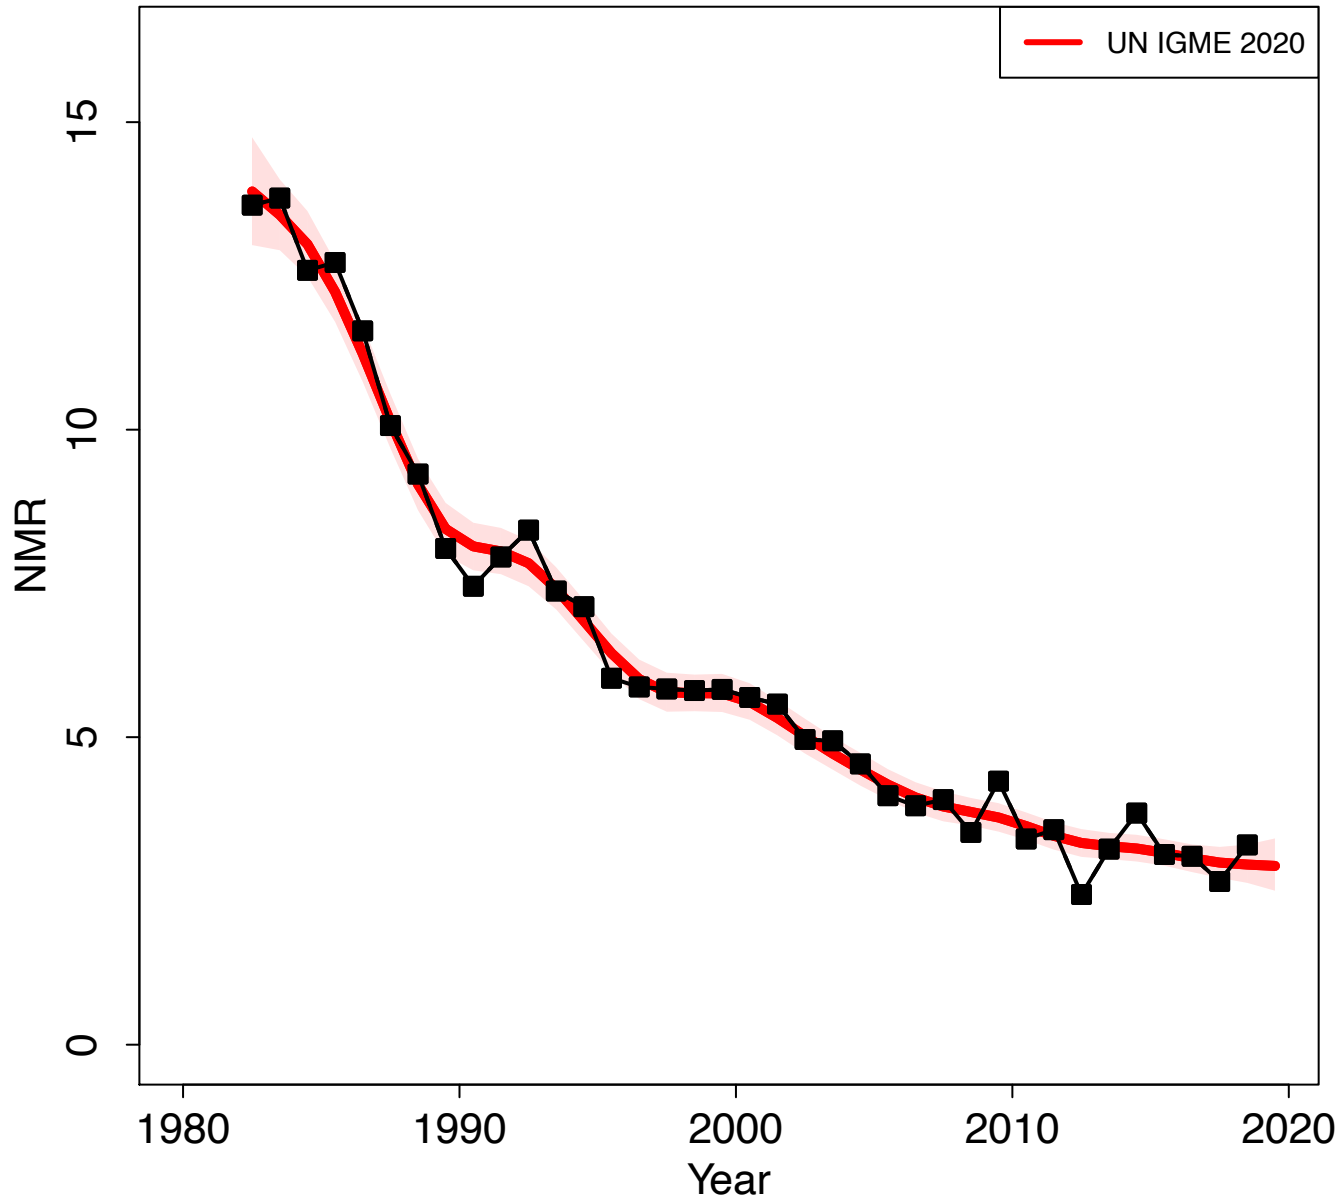

# Zoomed in

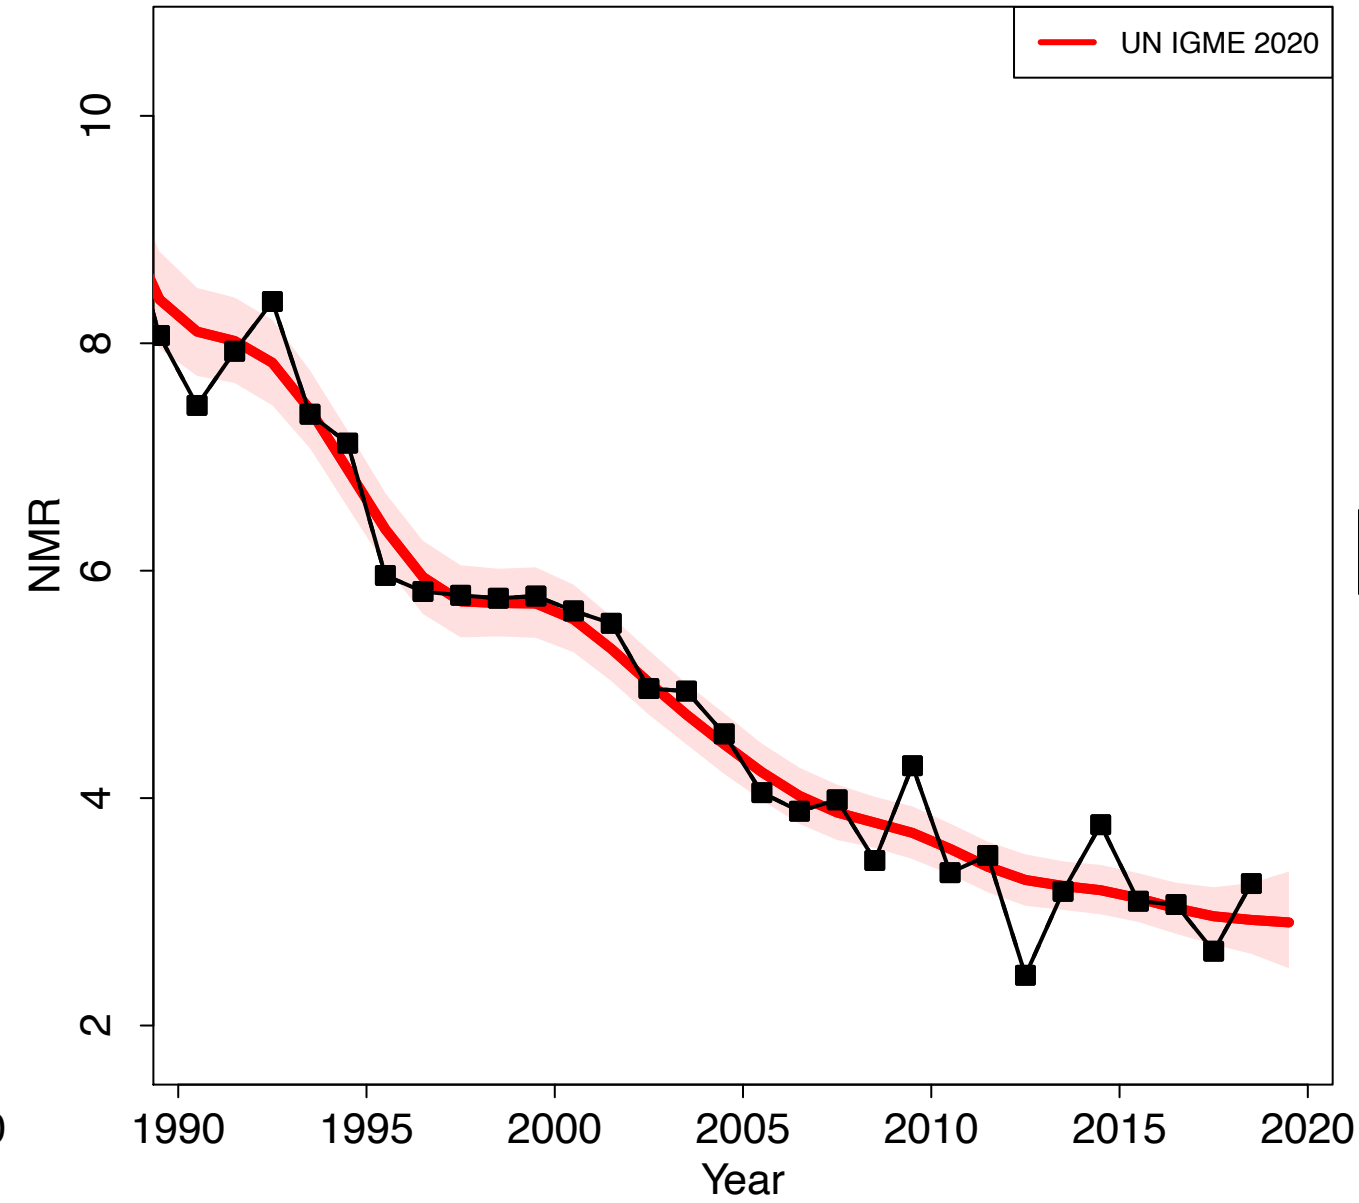

# Cuba

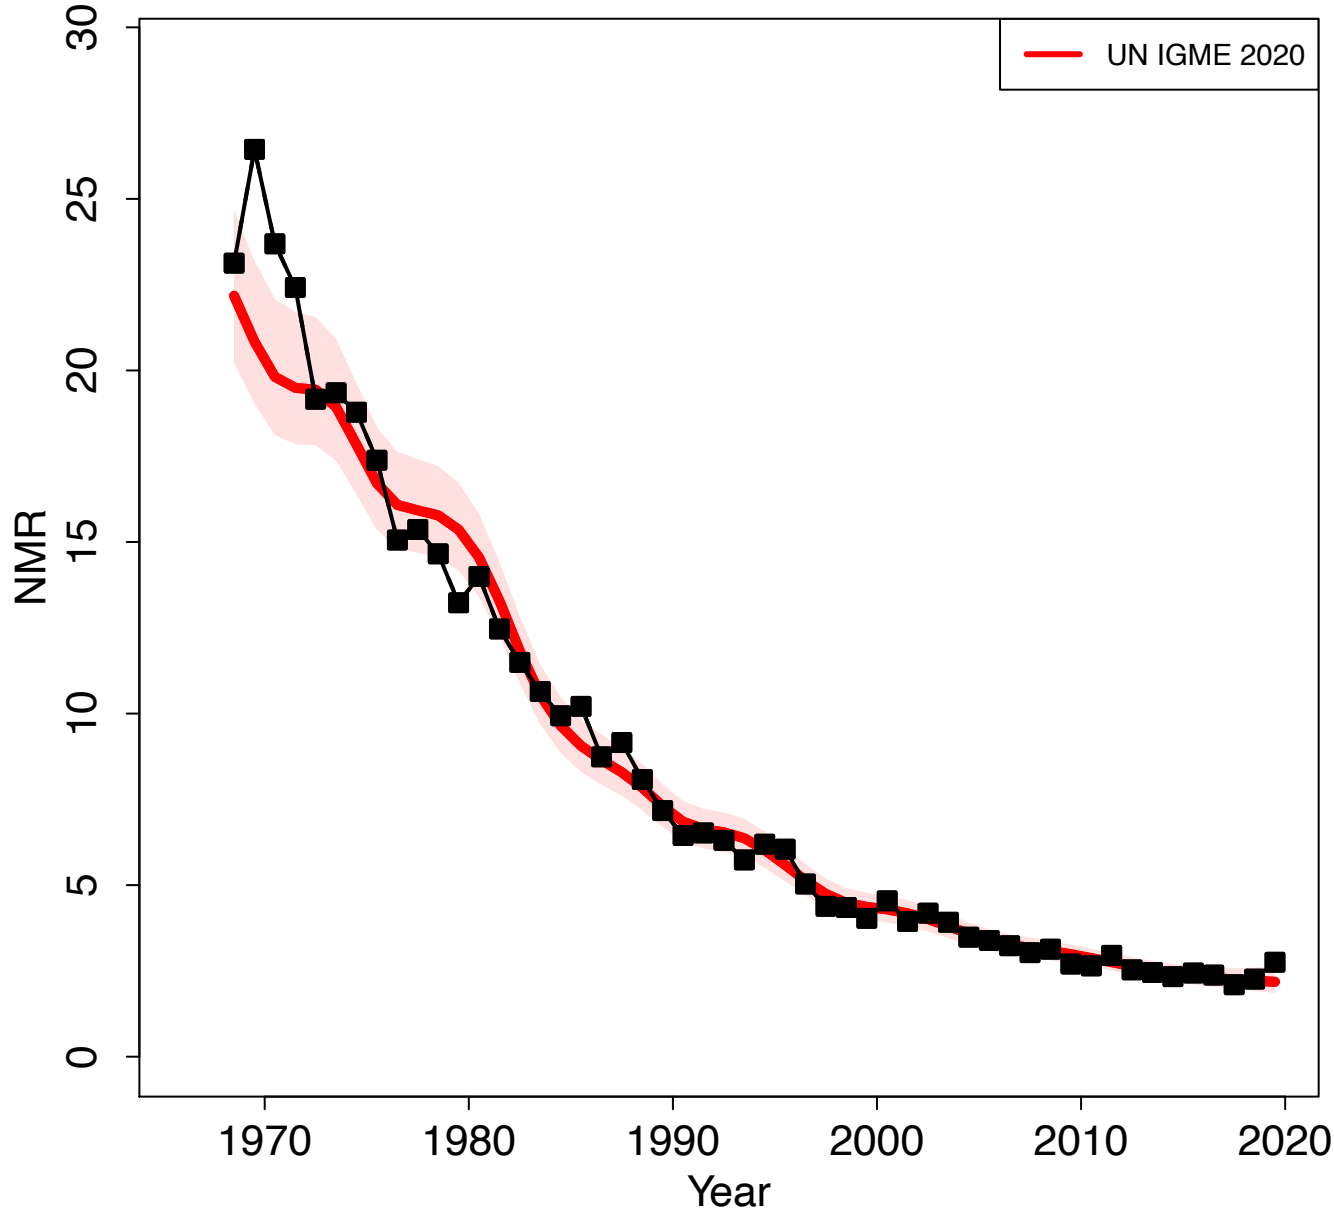

# Zoomed in

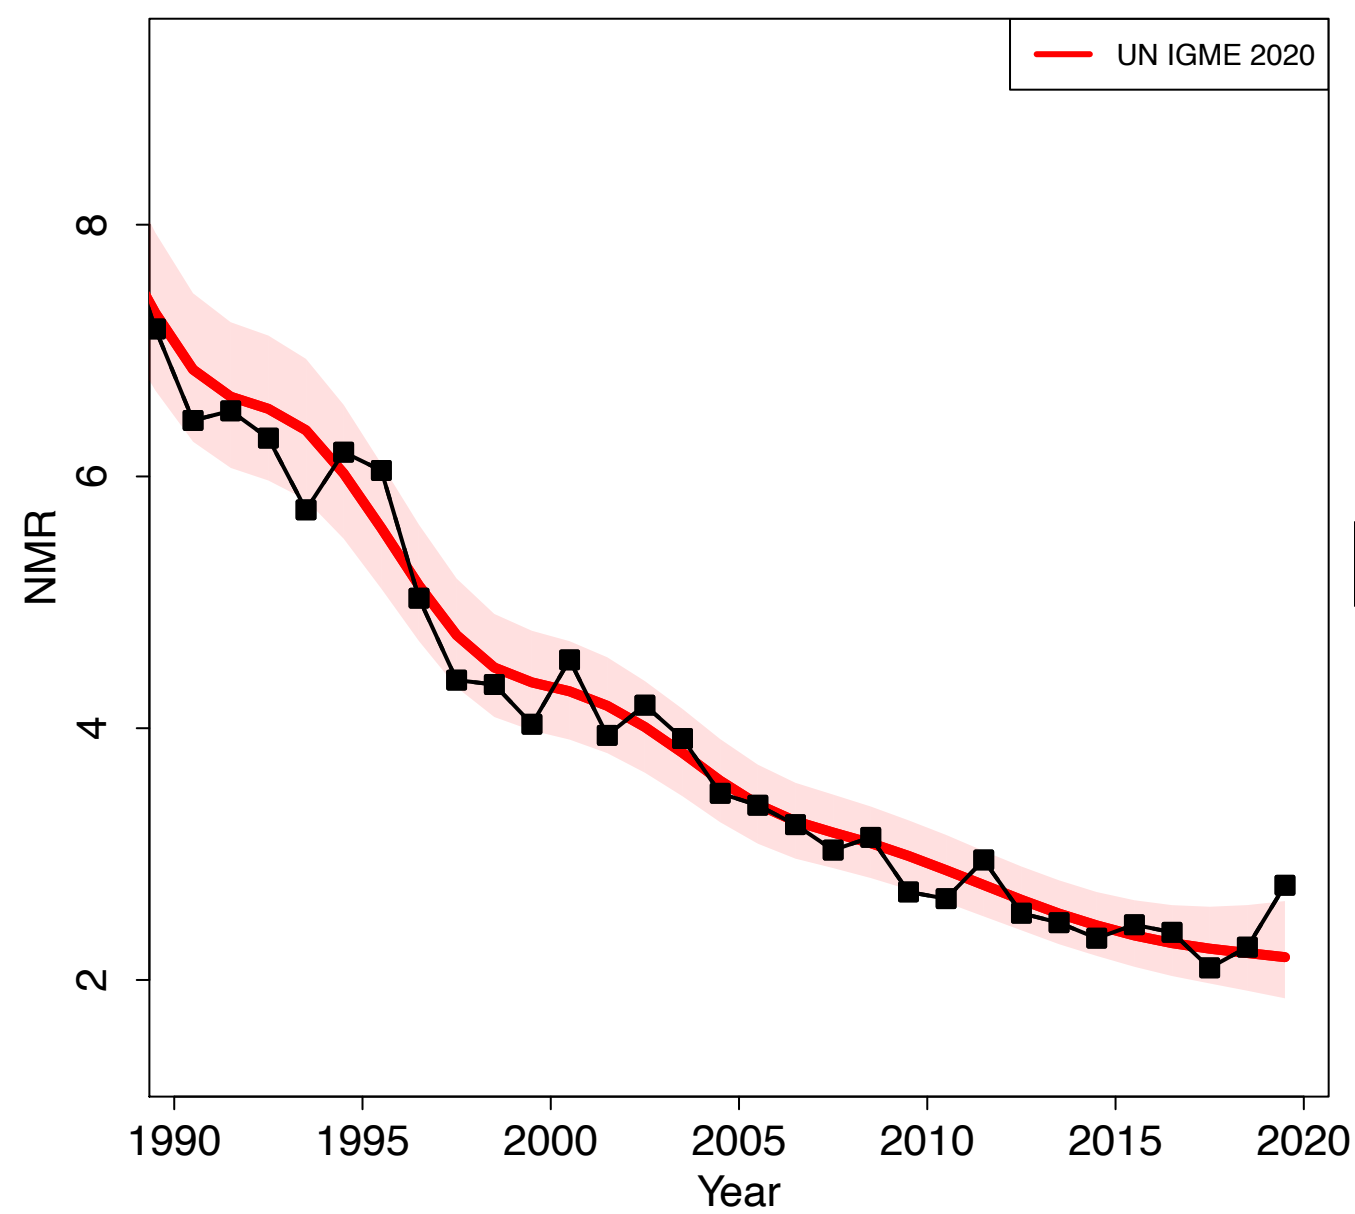

# Cyprus

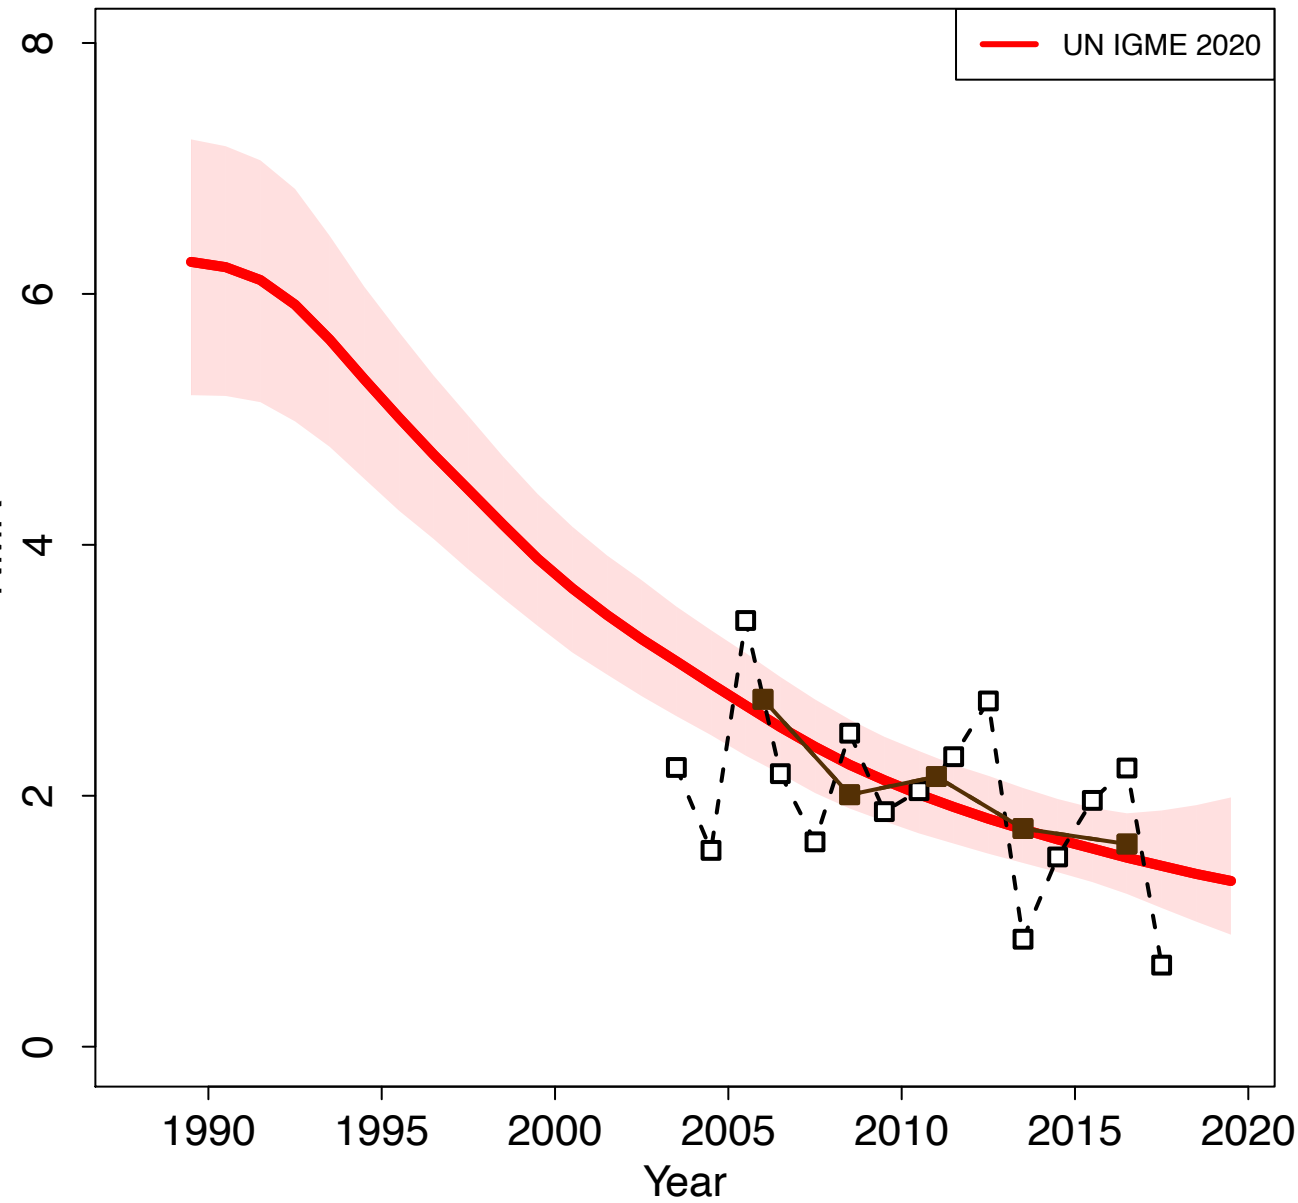

# Zoomed in

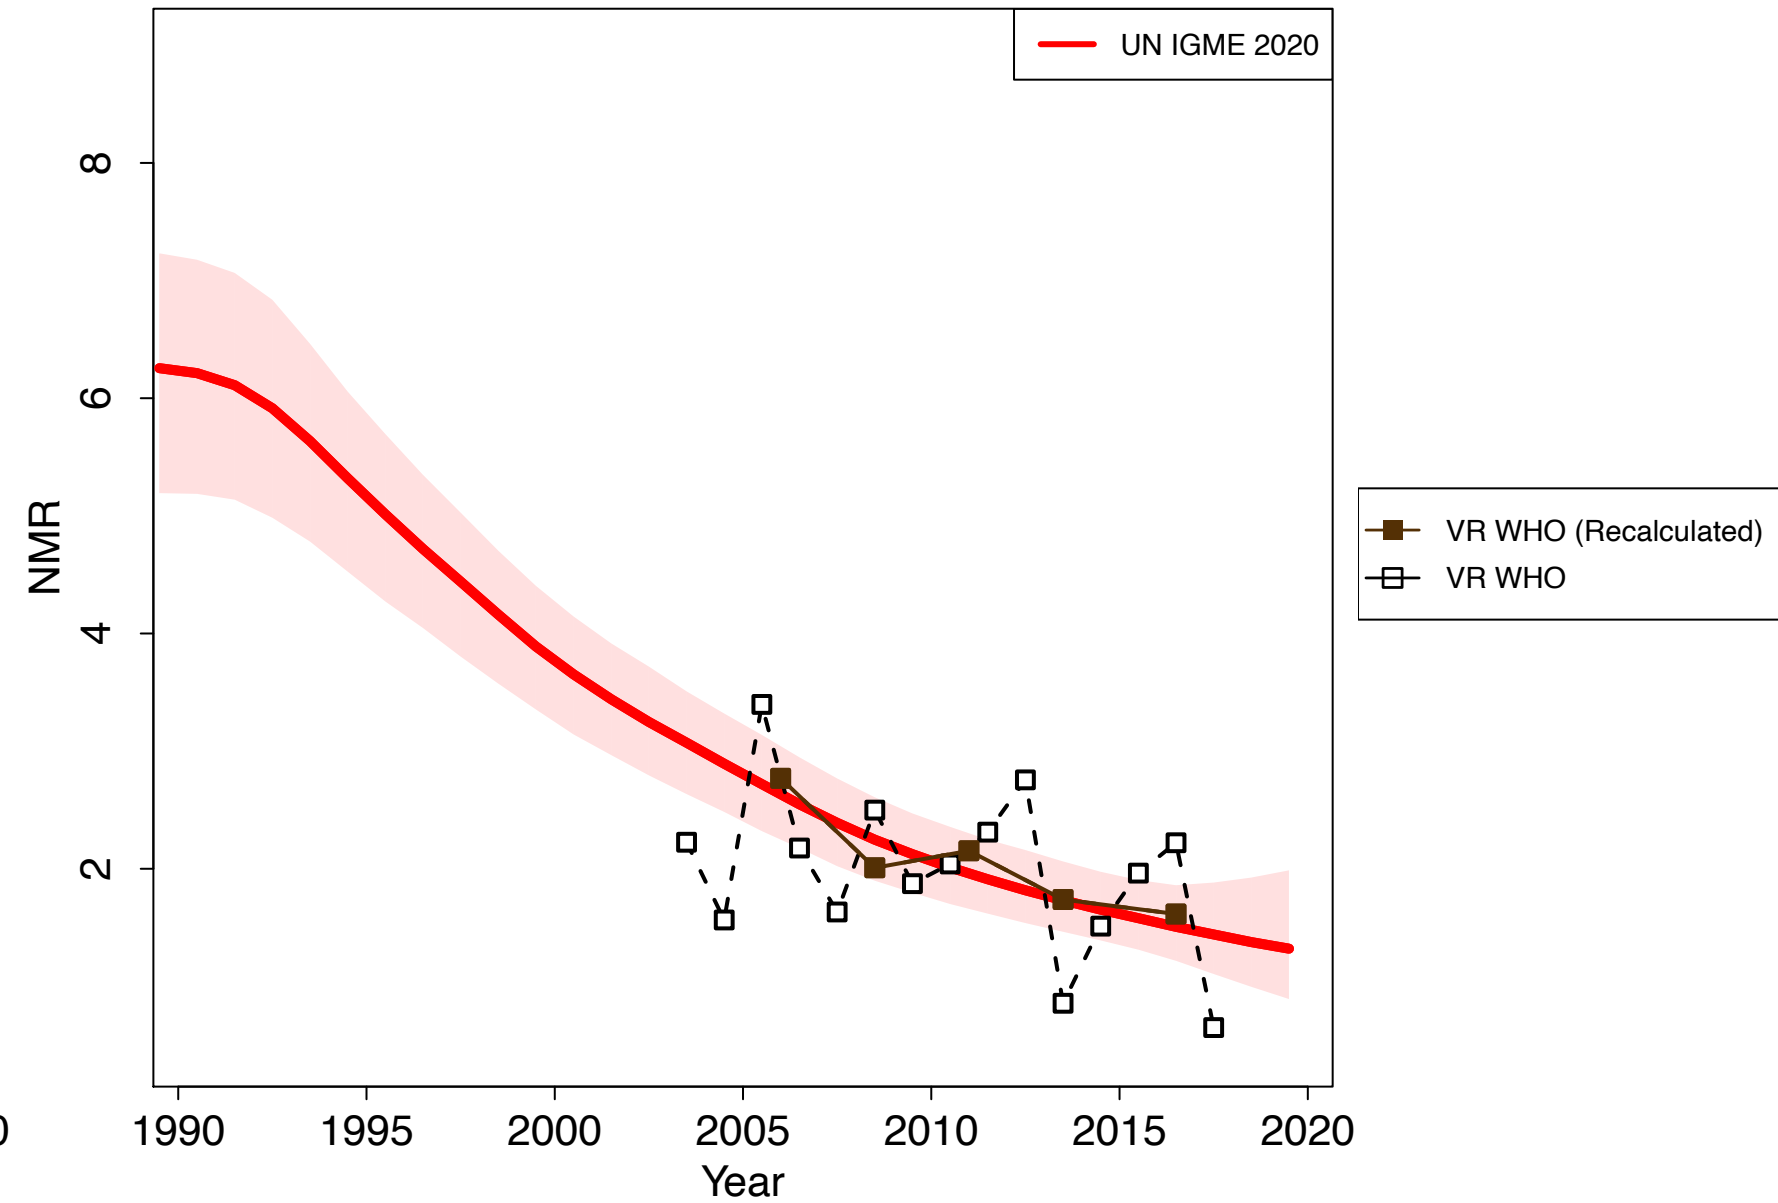

# Czechia

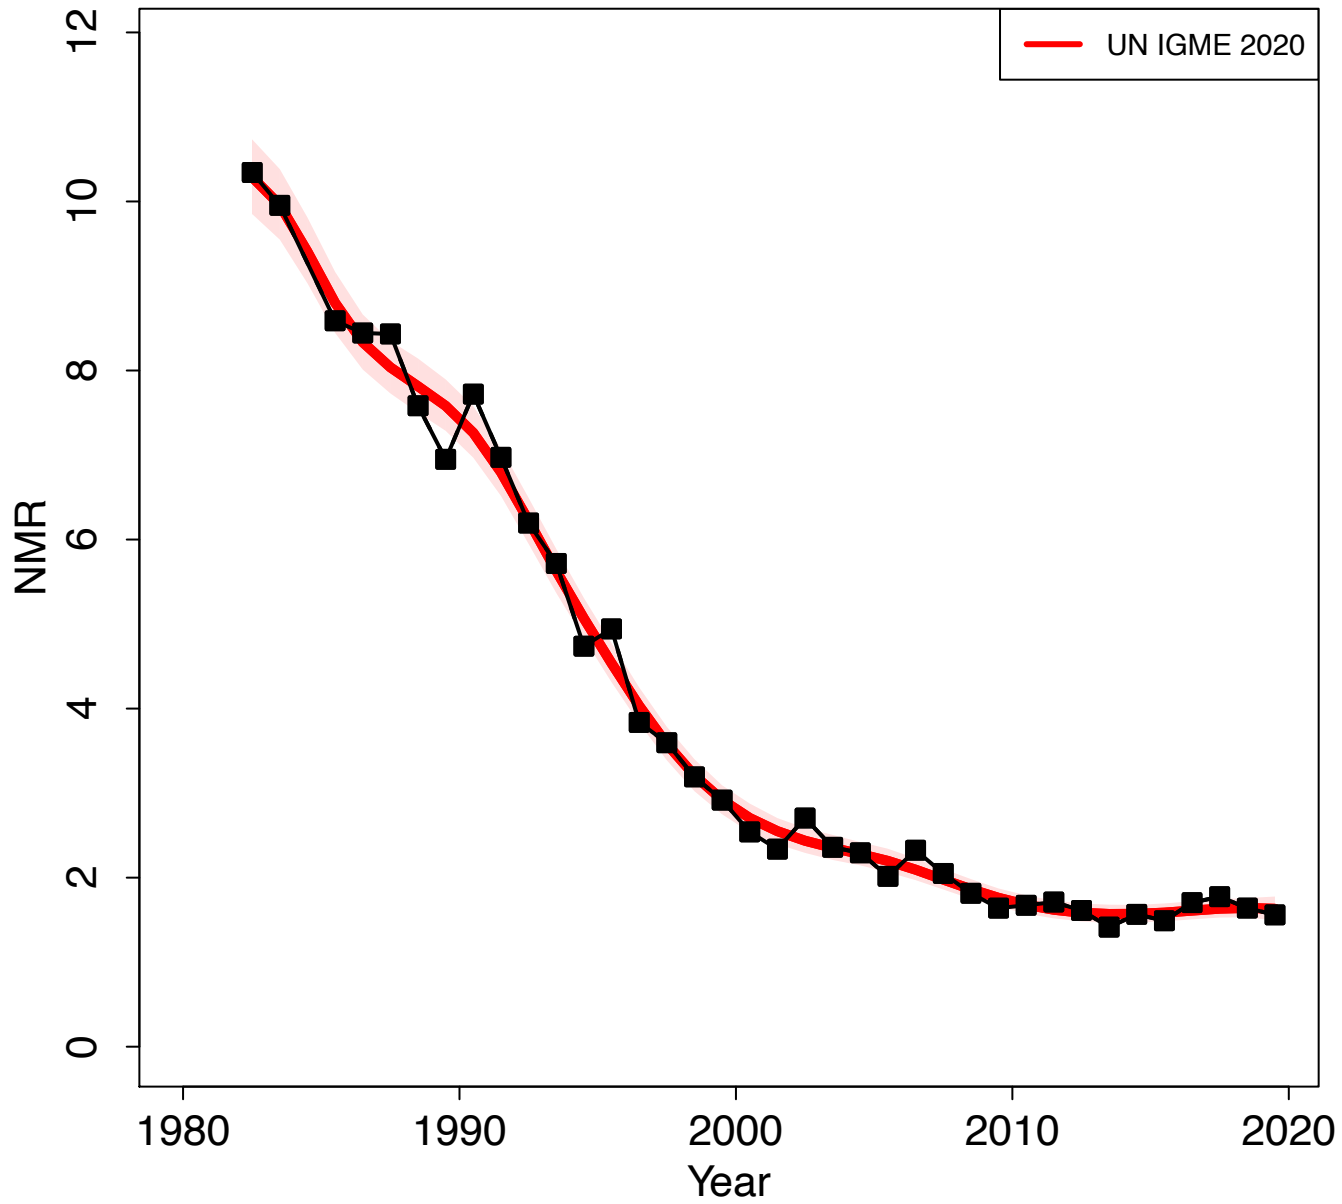

# Zoomed in

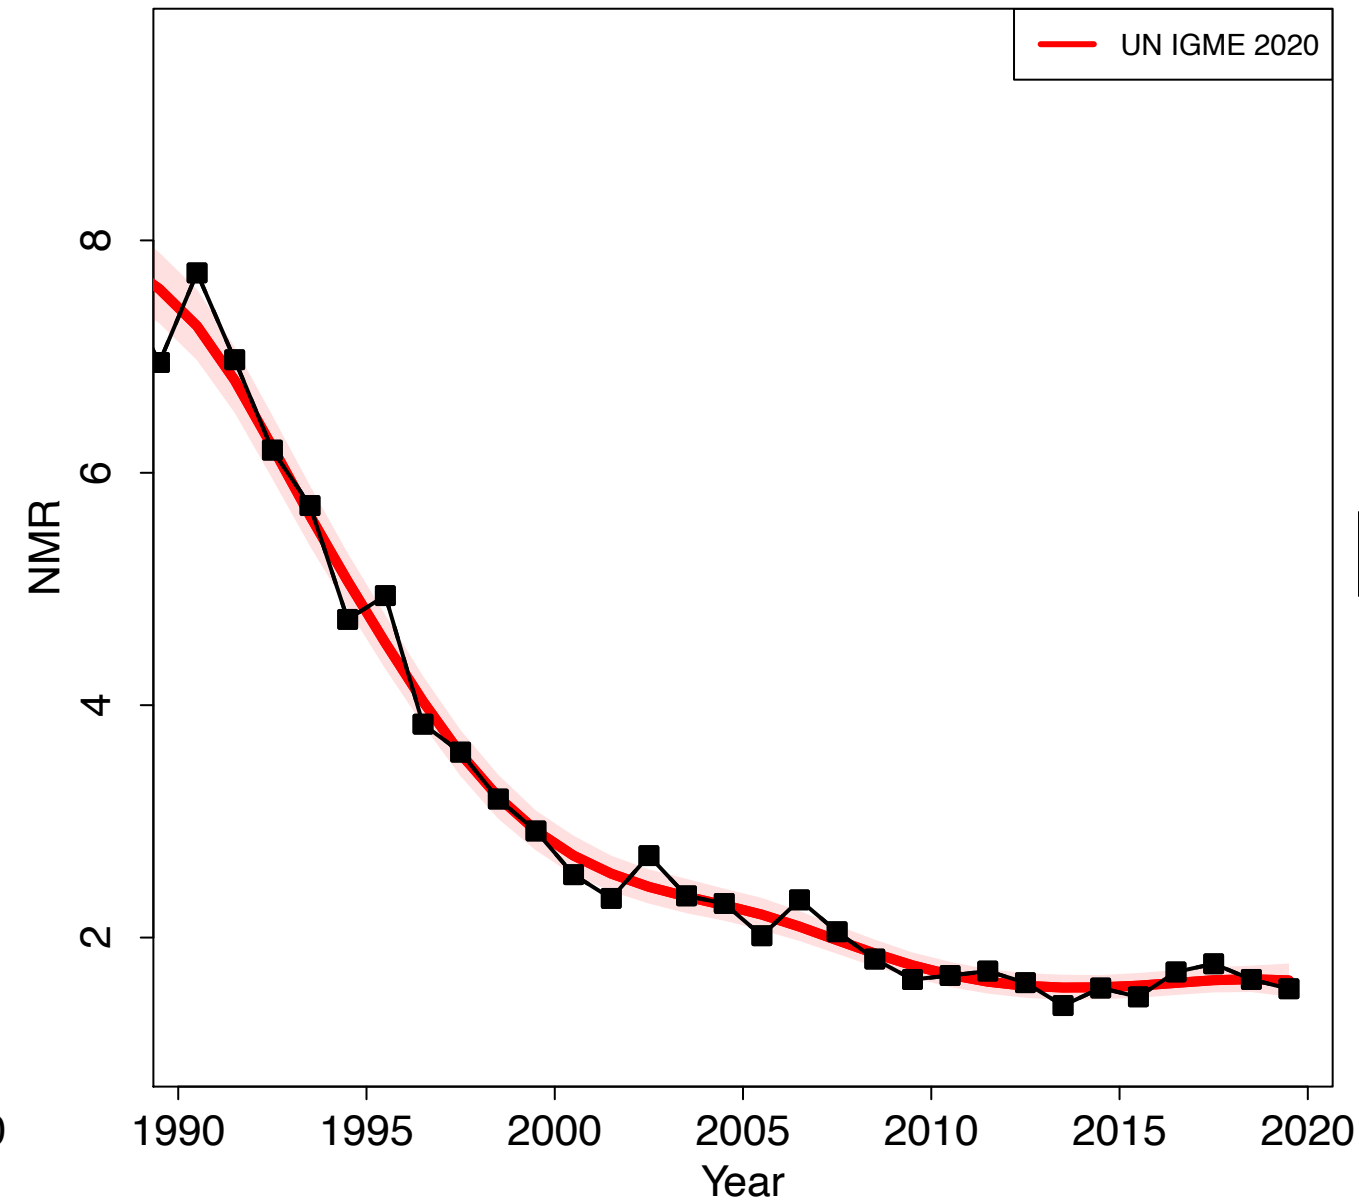

# Denmark

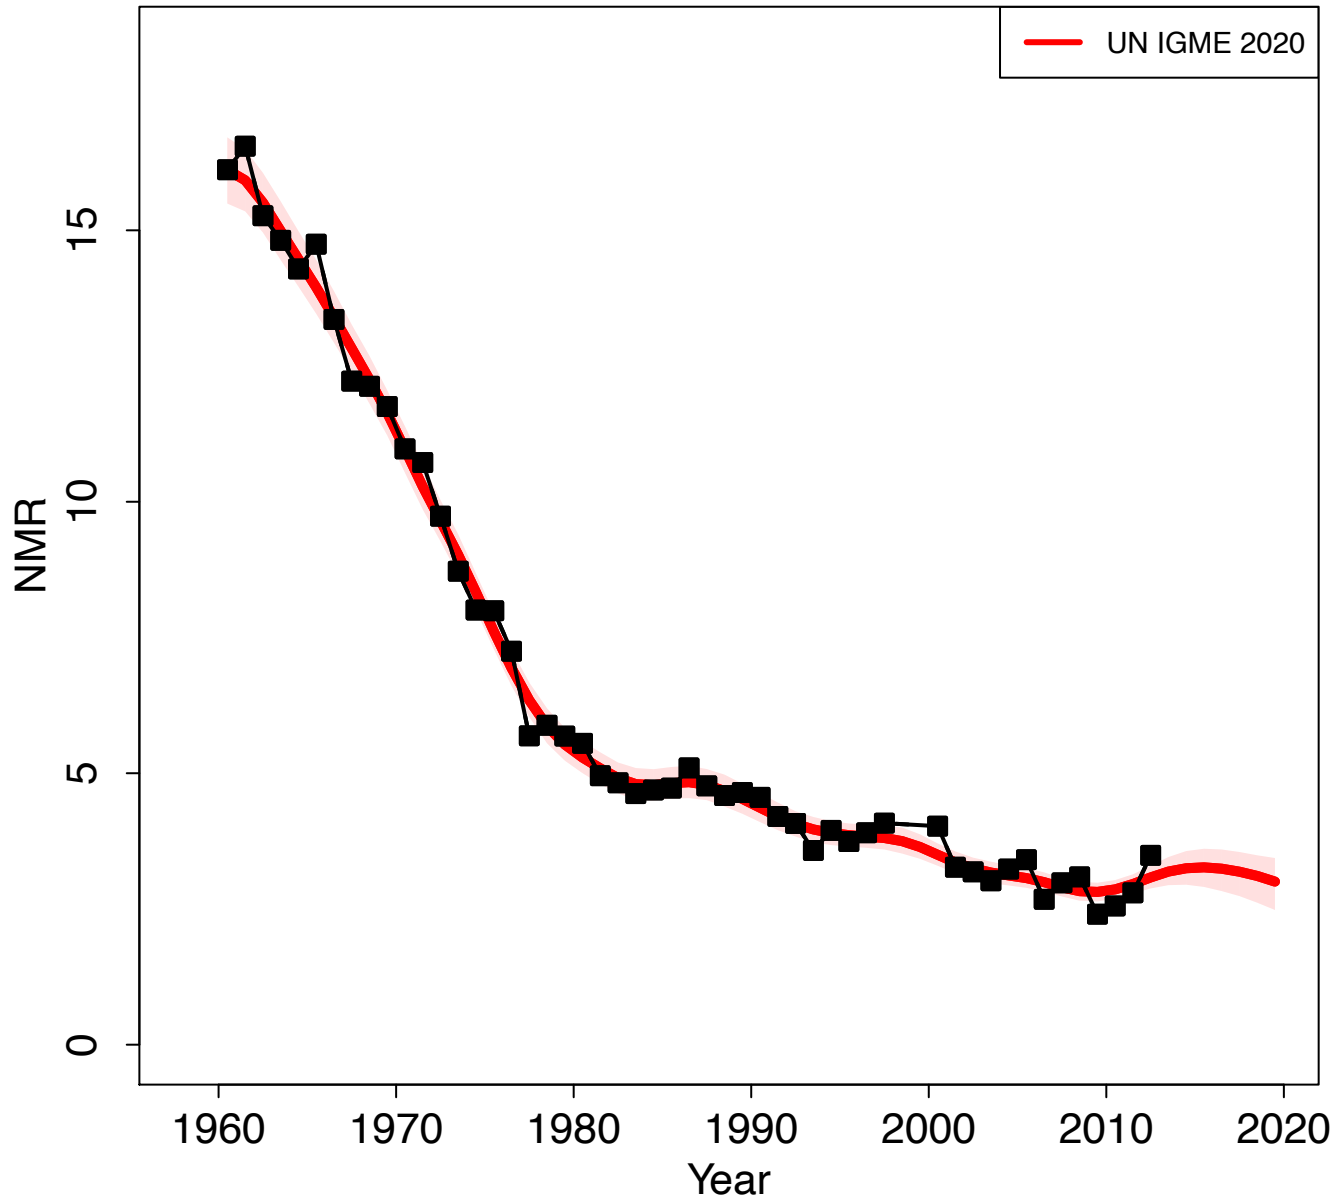

# Zoomed in

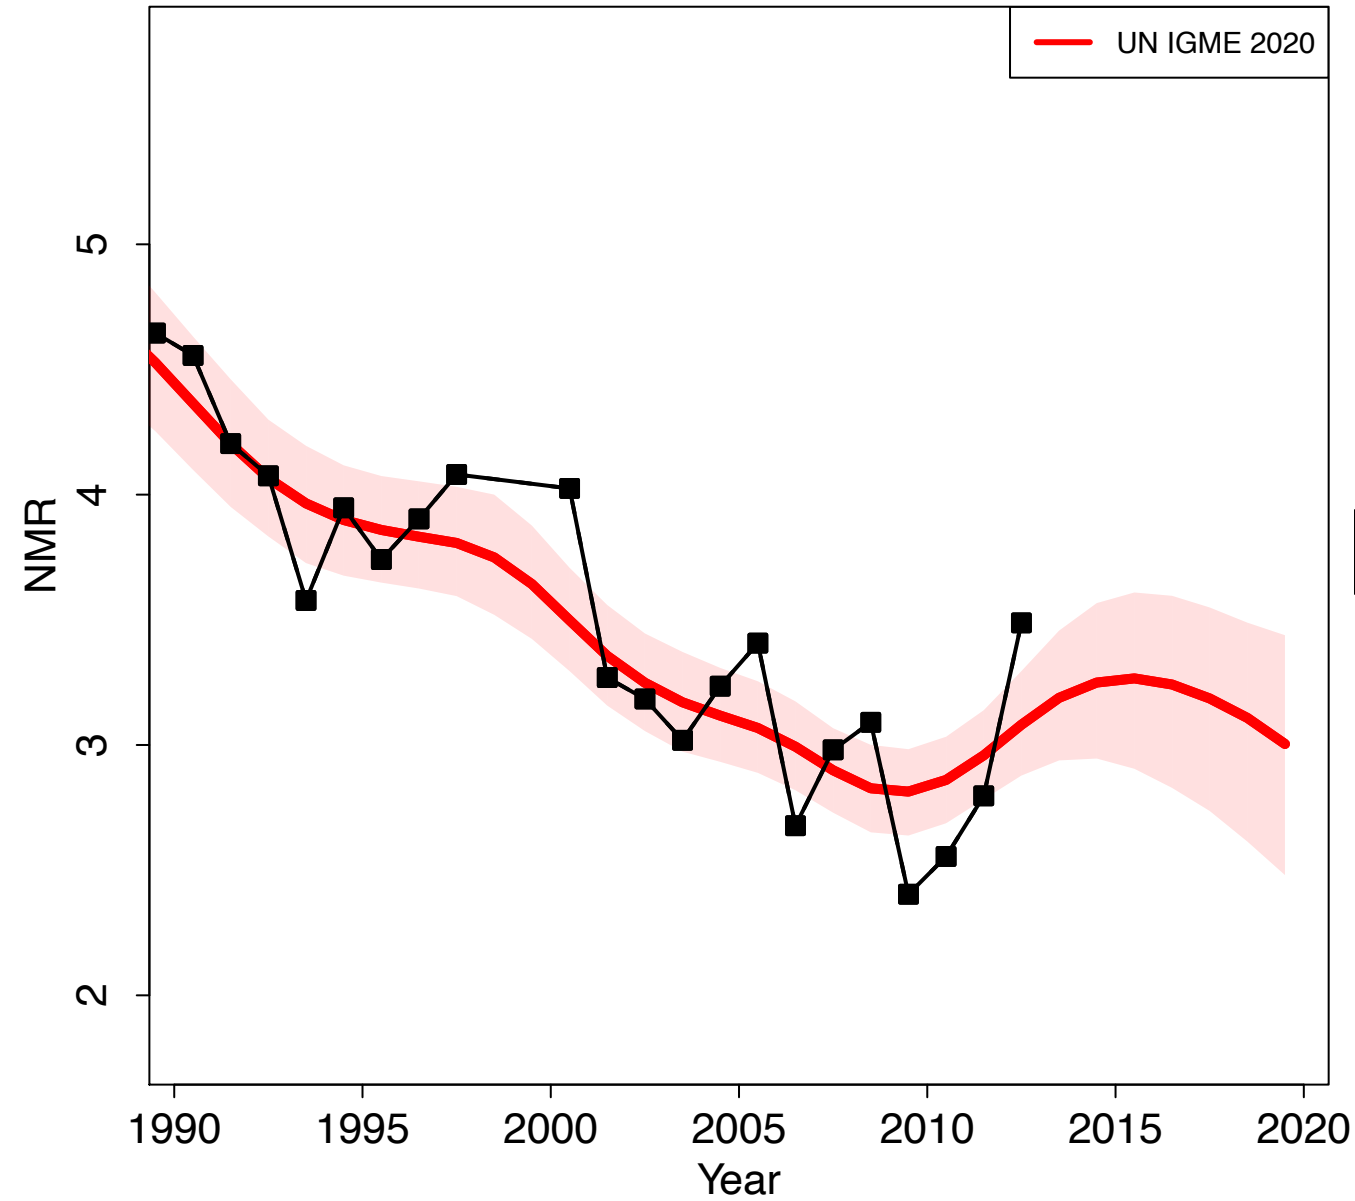

# Djibouti

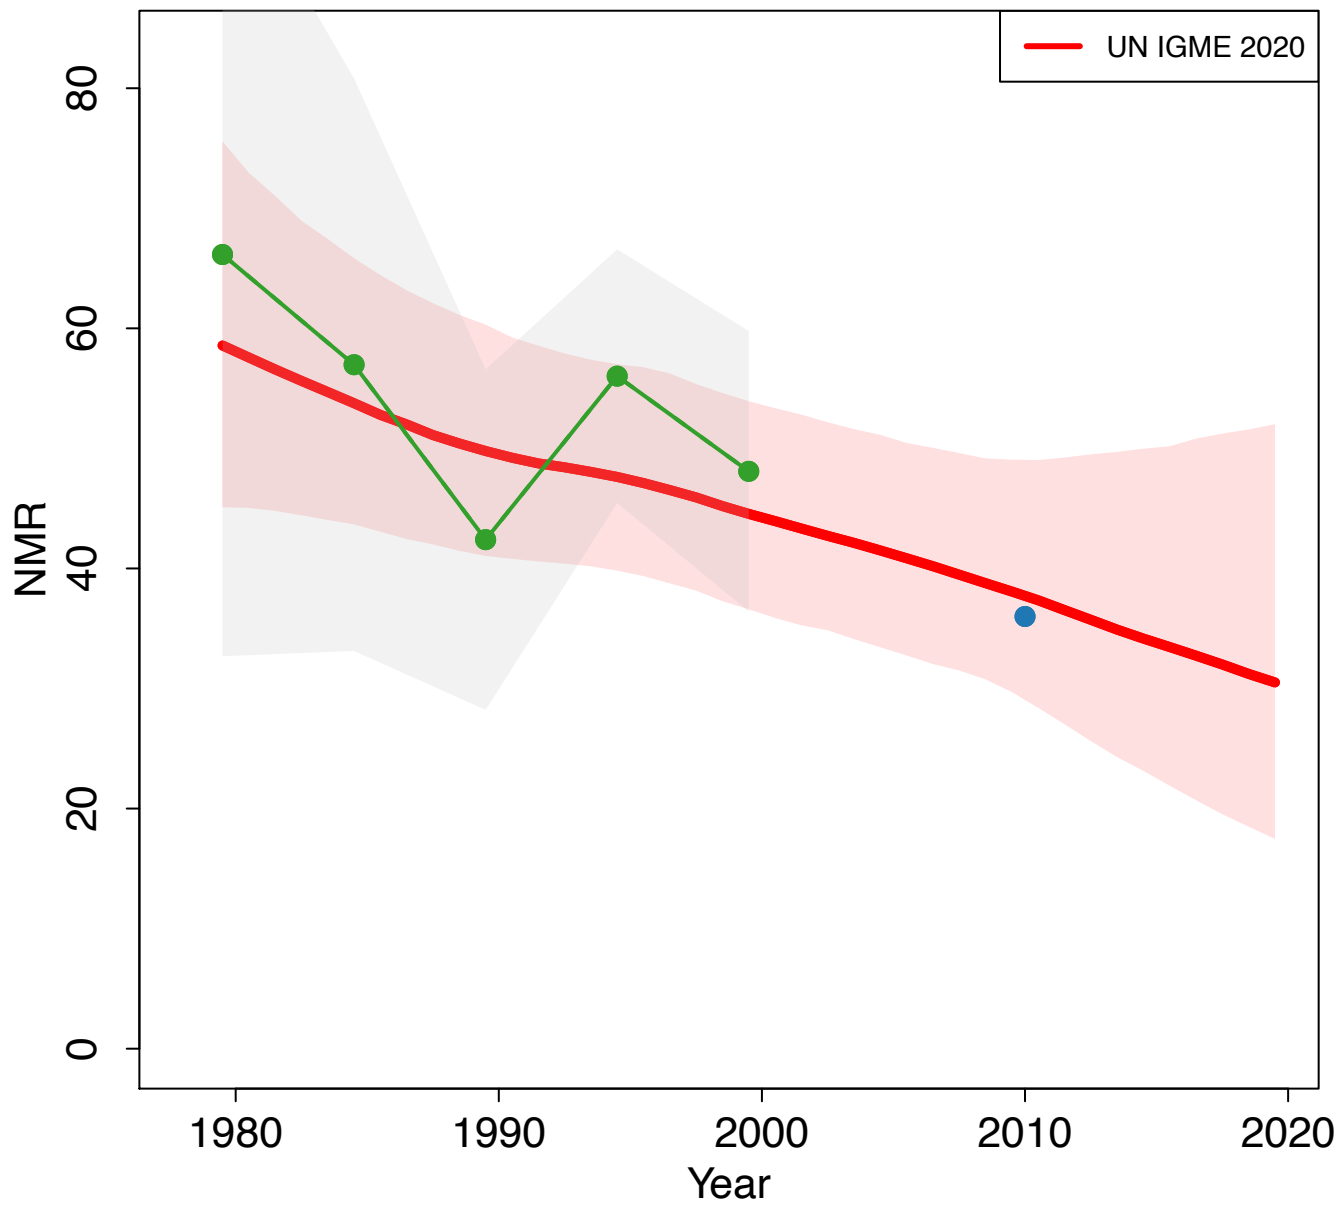

# Zoomed in

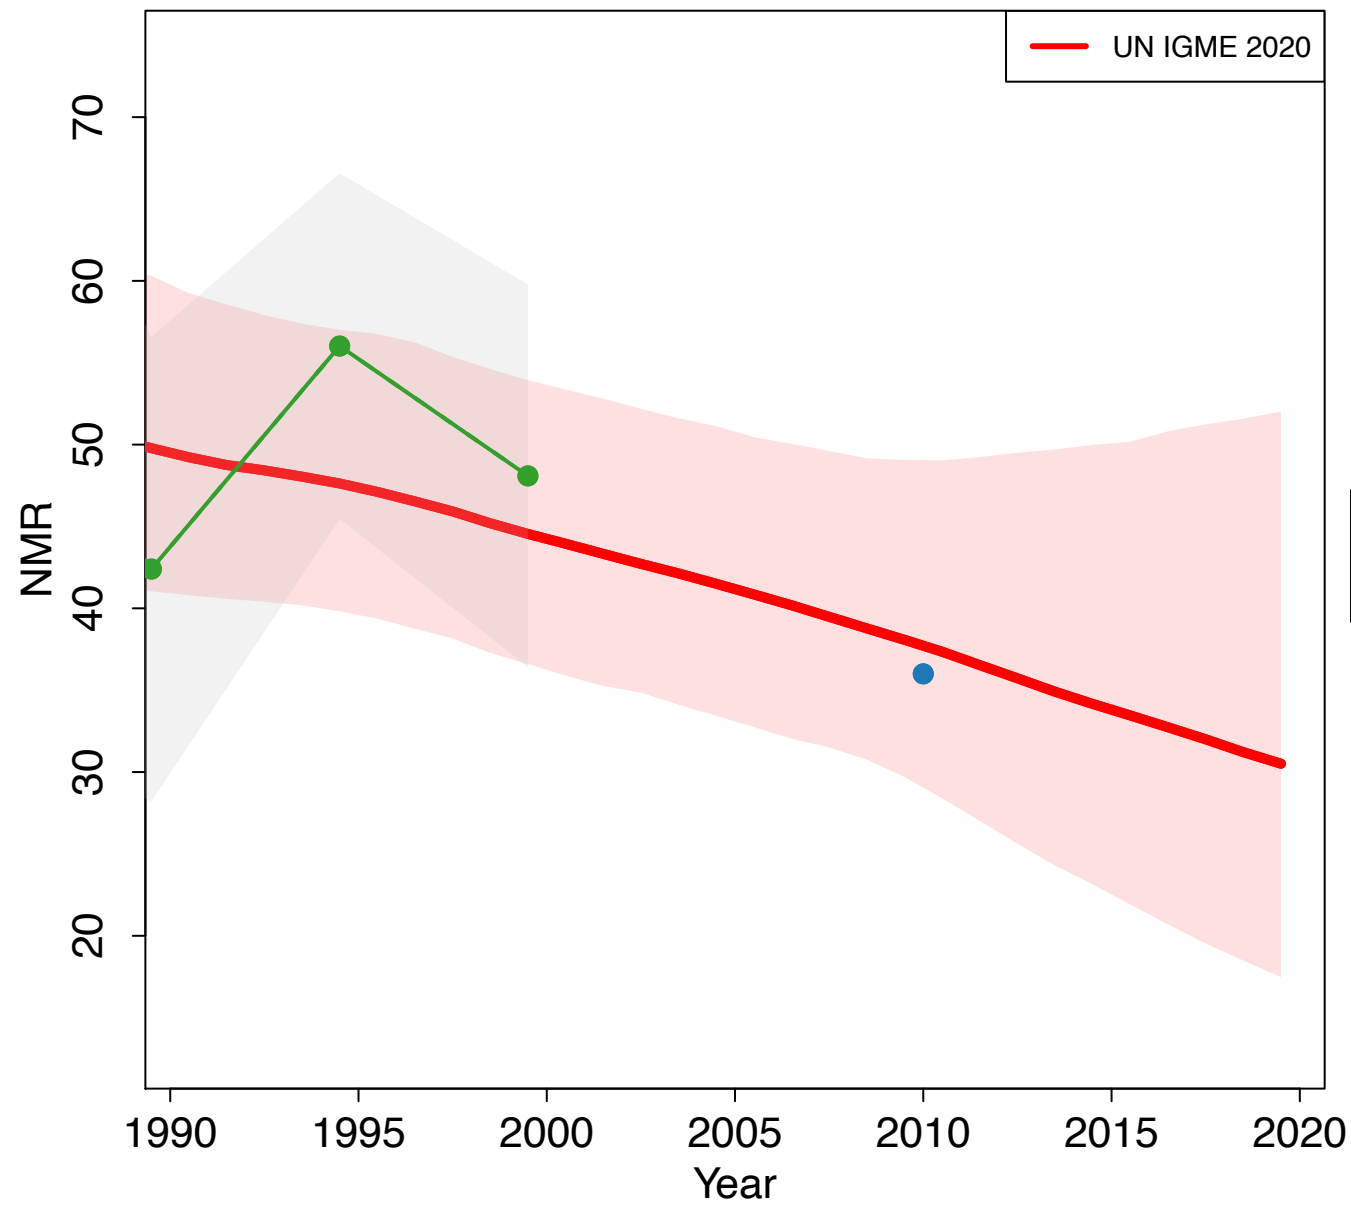

# Dominica

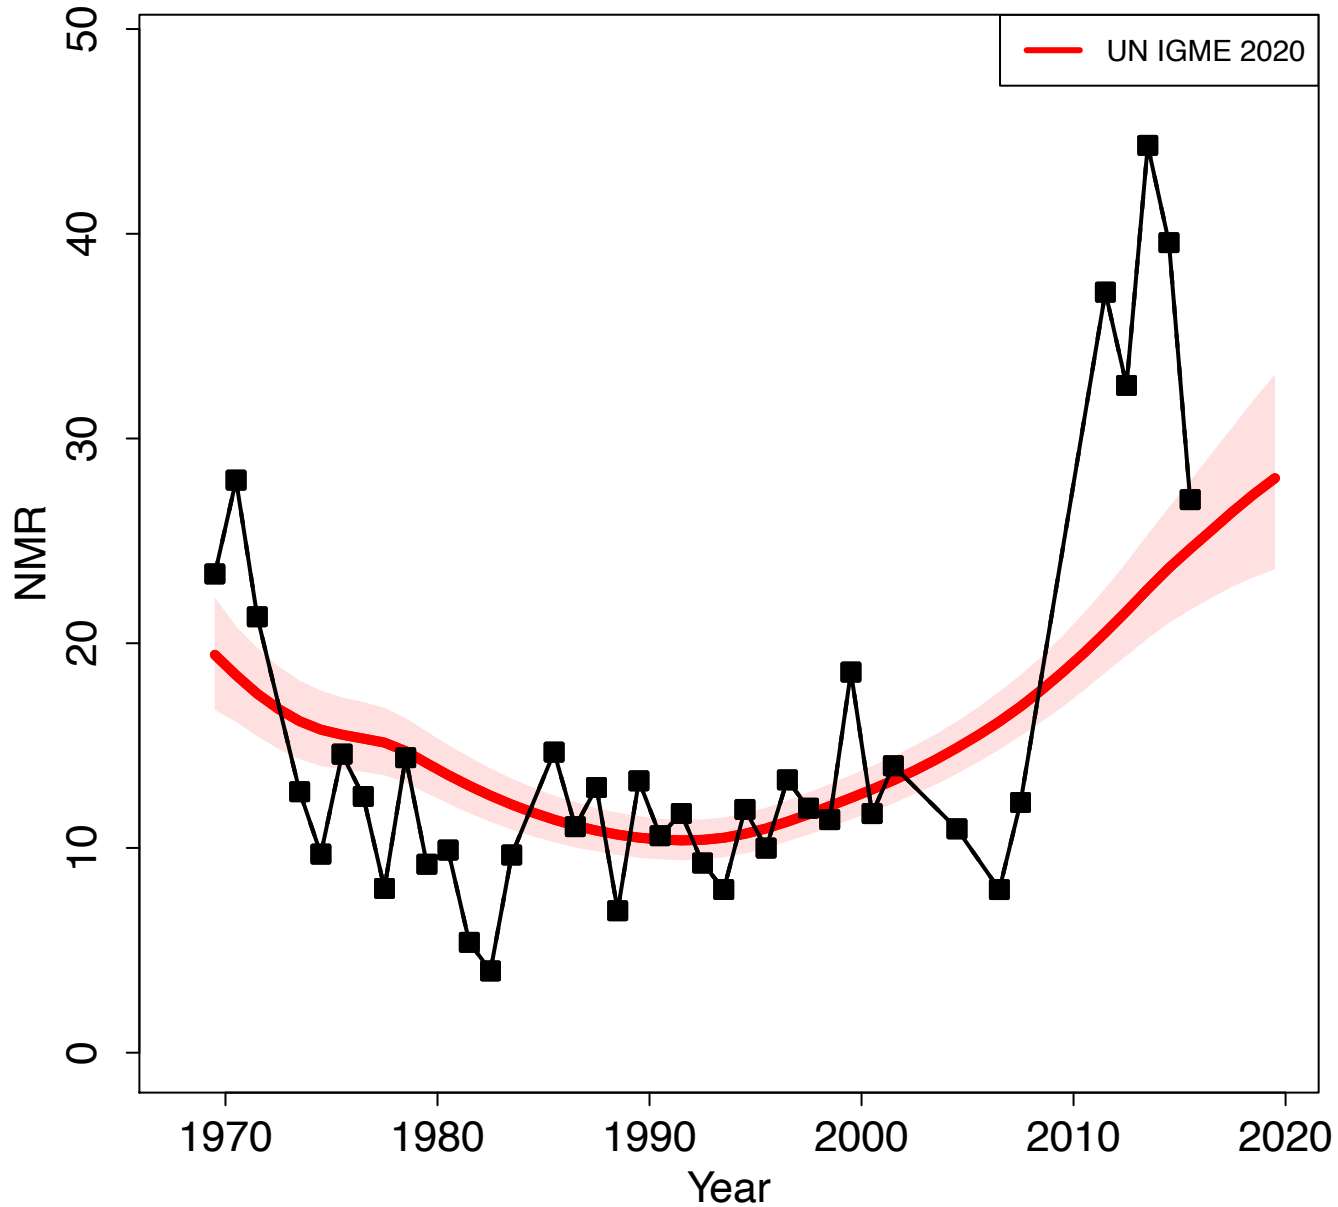

# Zoomed in

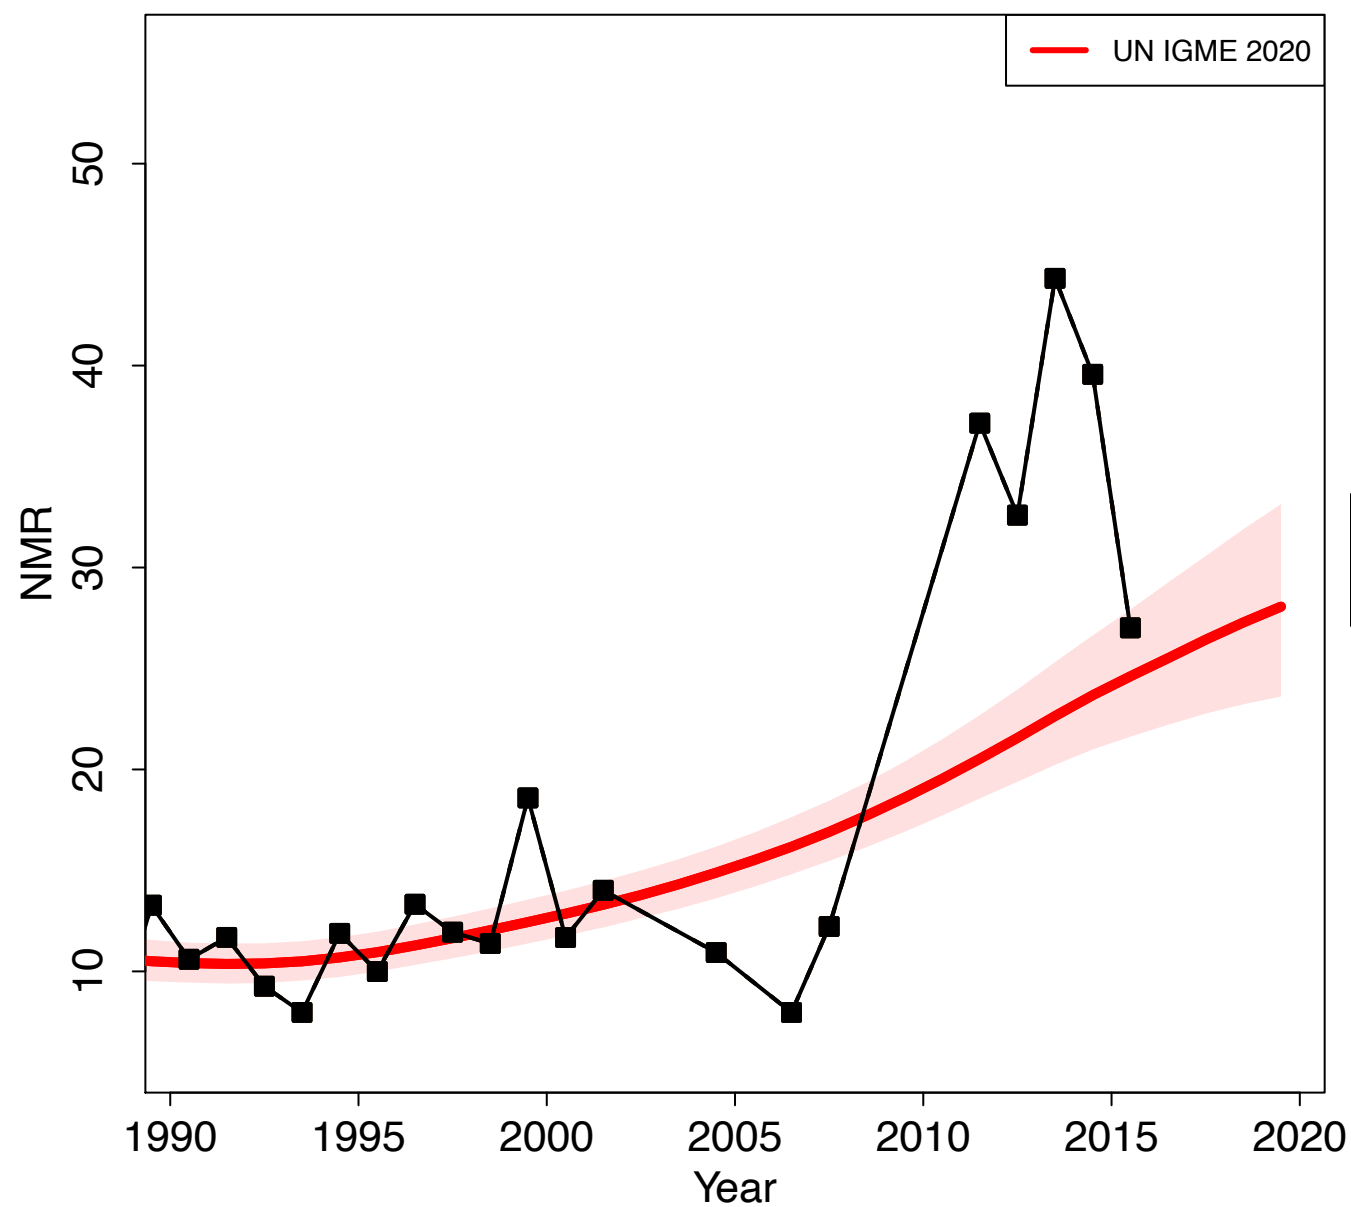

# Dominican Republic

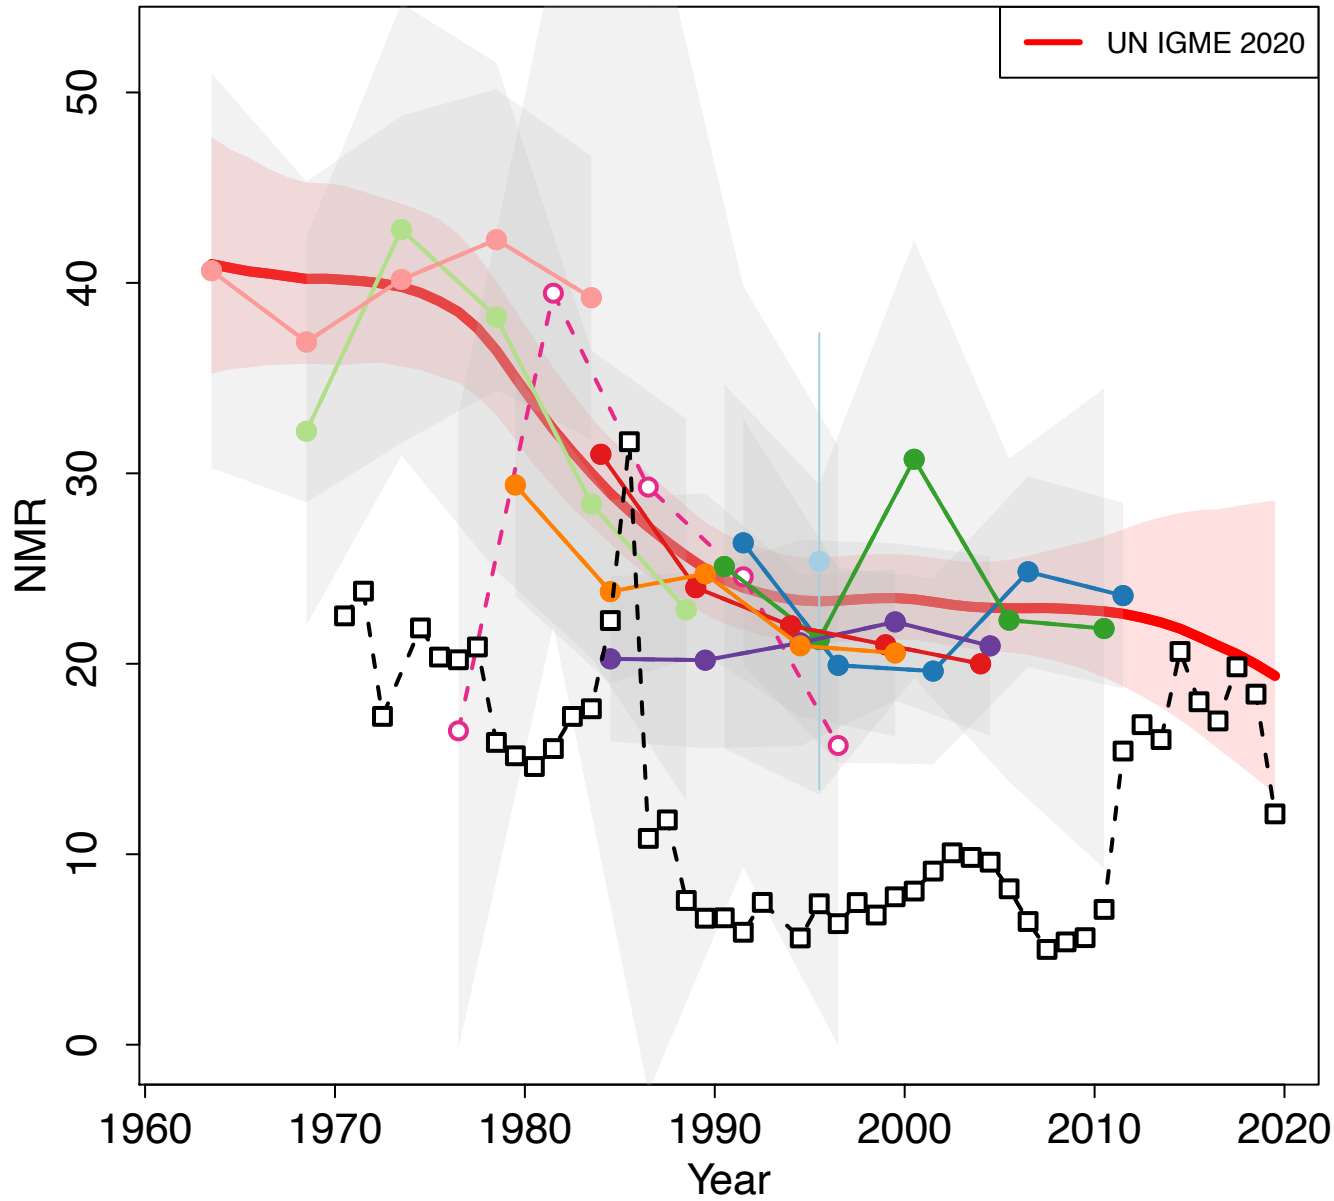

# Zoomed in

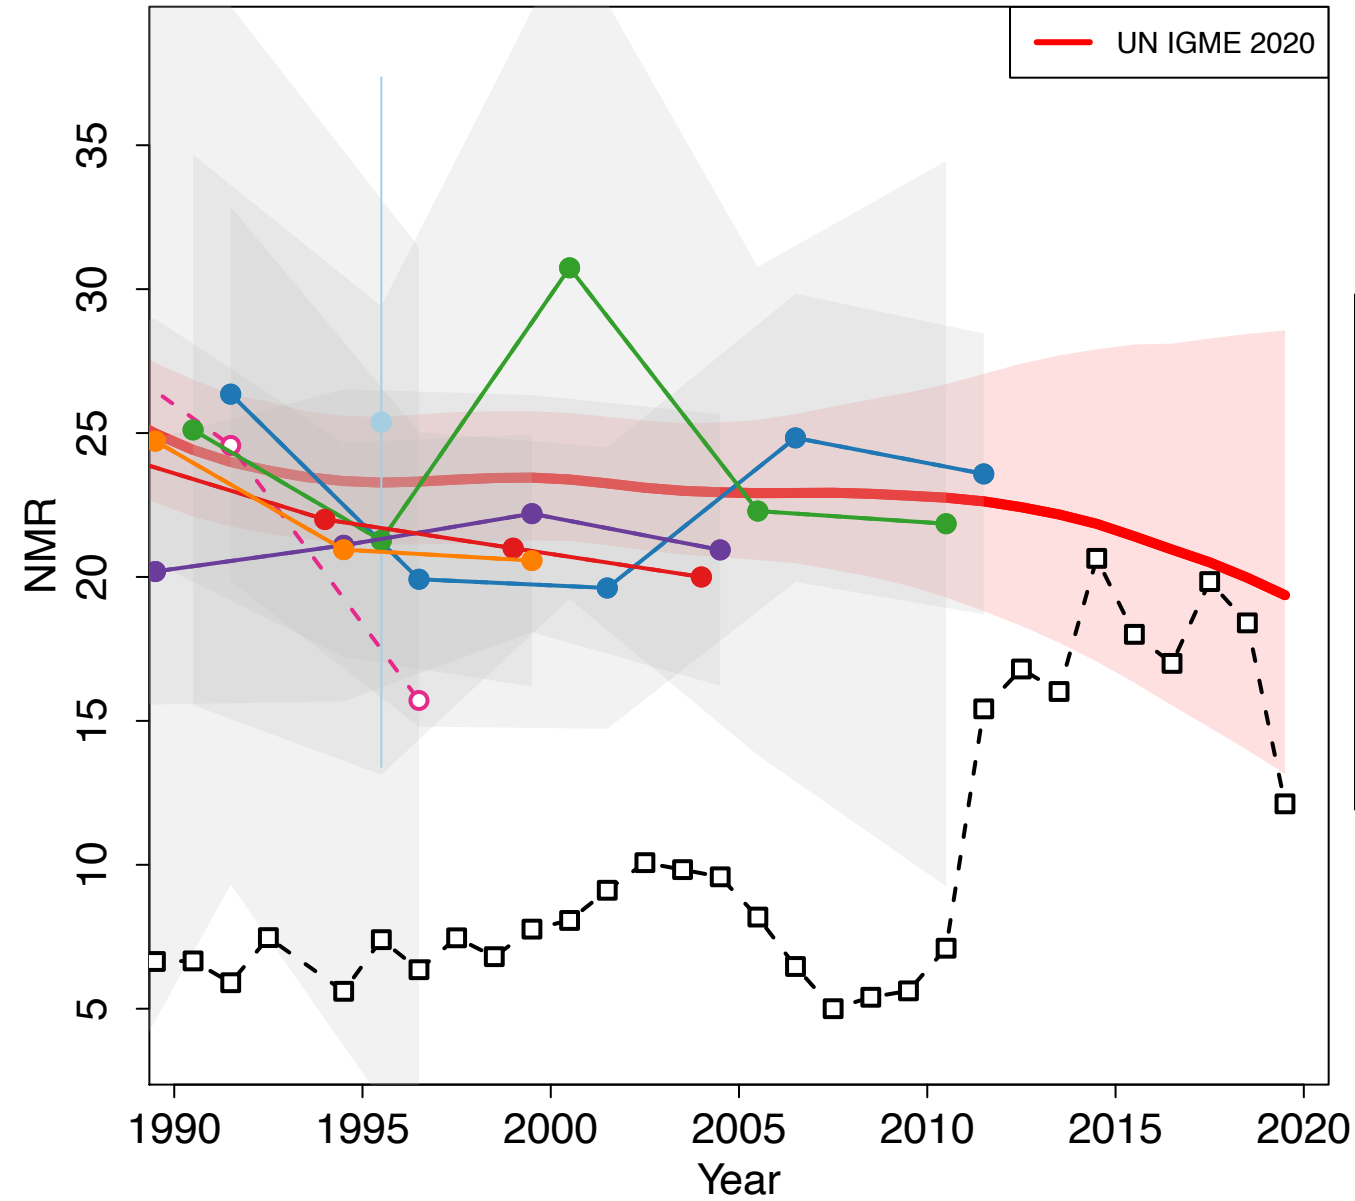

- Demographic and Health Survey 1986 (DHS)
- Demographic and Health Survey 1991 (DHS)
- Demographic and Health Survey 1996 (DHS)
- Demographic and Health Survey 1999 (DHS)
- Demographic and Health Survey 2002 (DHS)
- Multiple Indicator Cluster Survey 2006 (MICS)
- Demographic and Health Survey 2007 (DHS)
- Demographic and Health Survey 2013 (DHS)
- Multiple Indicator Cluster Survey 2014 (MICS)
- VR WHO



# Ecuador

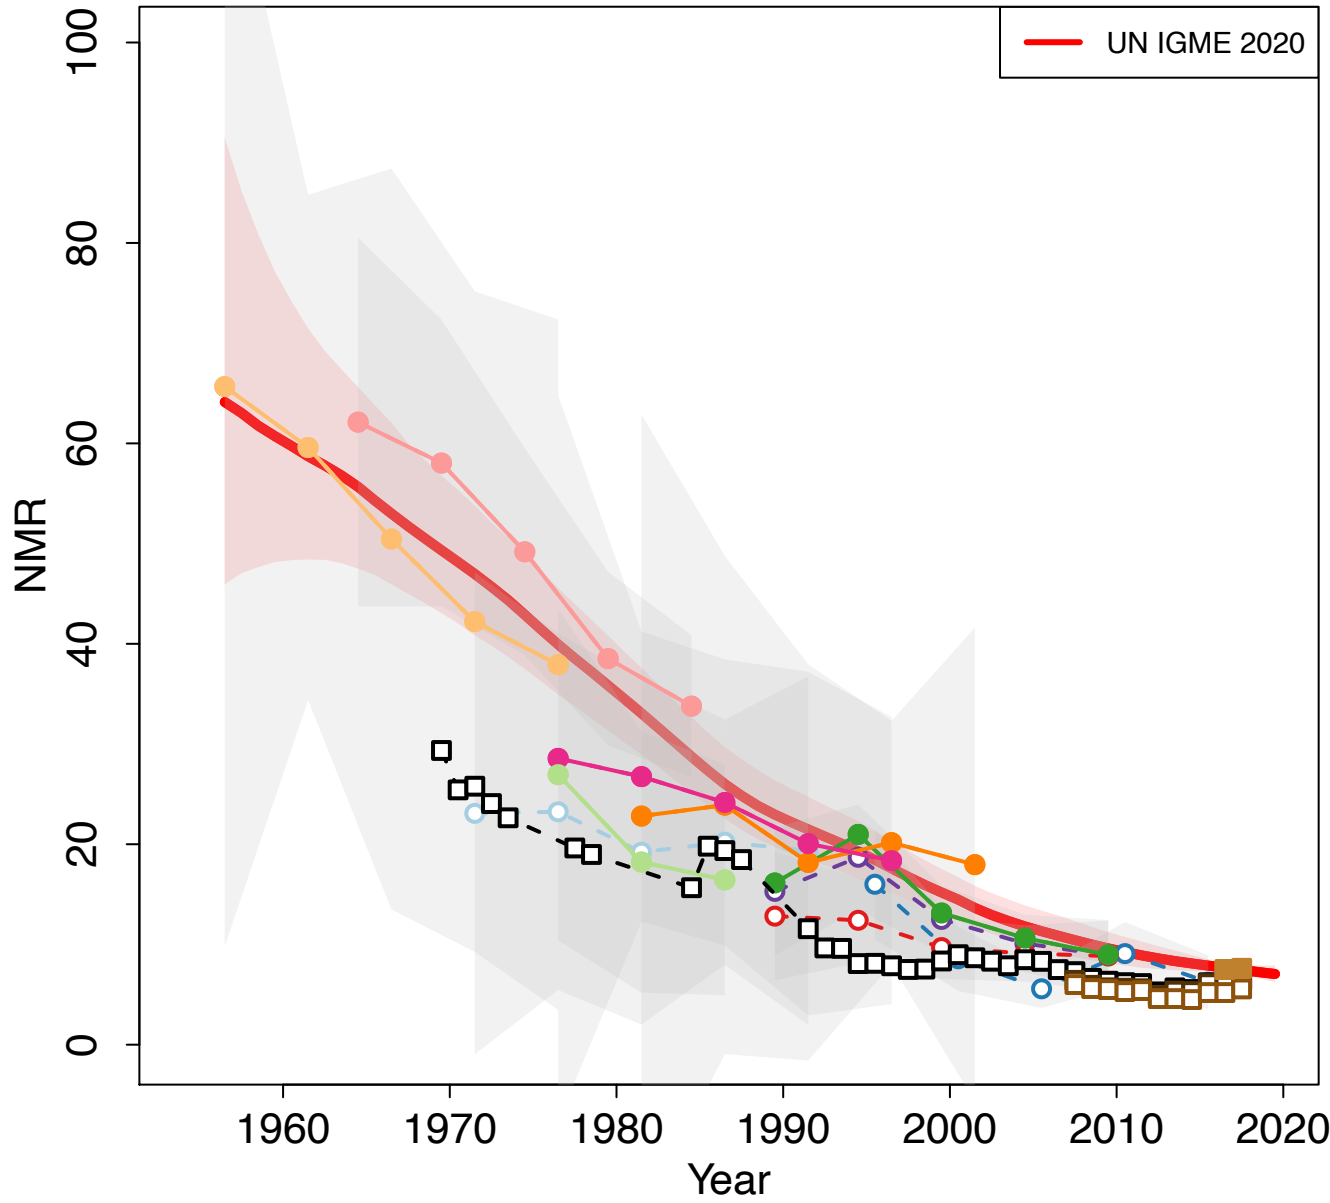

# Zoomed in

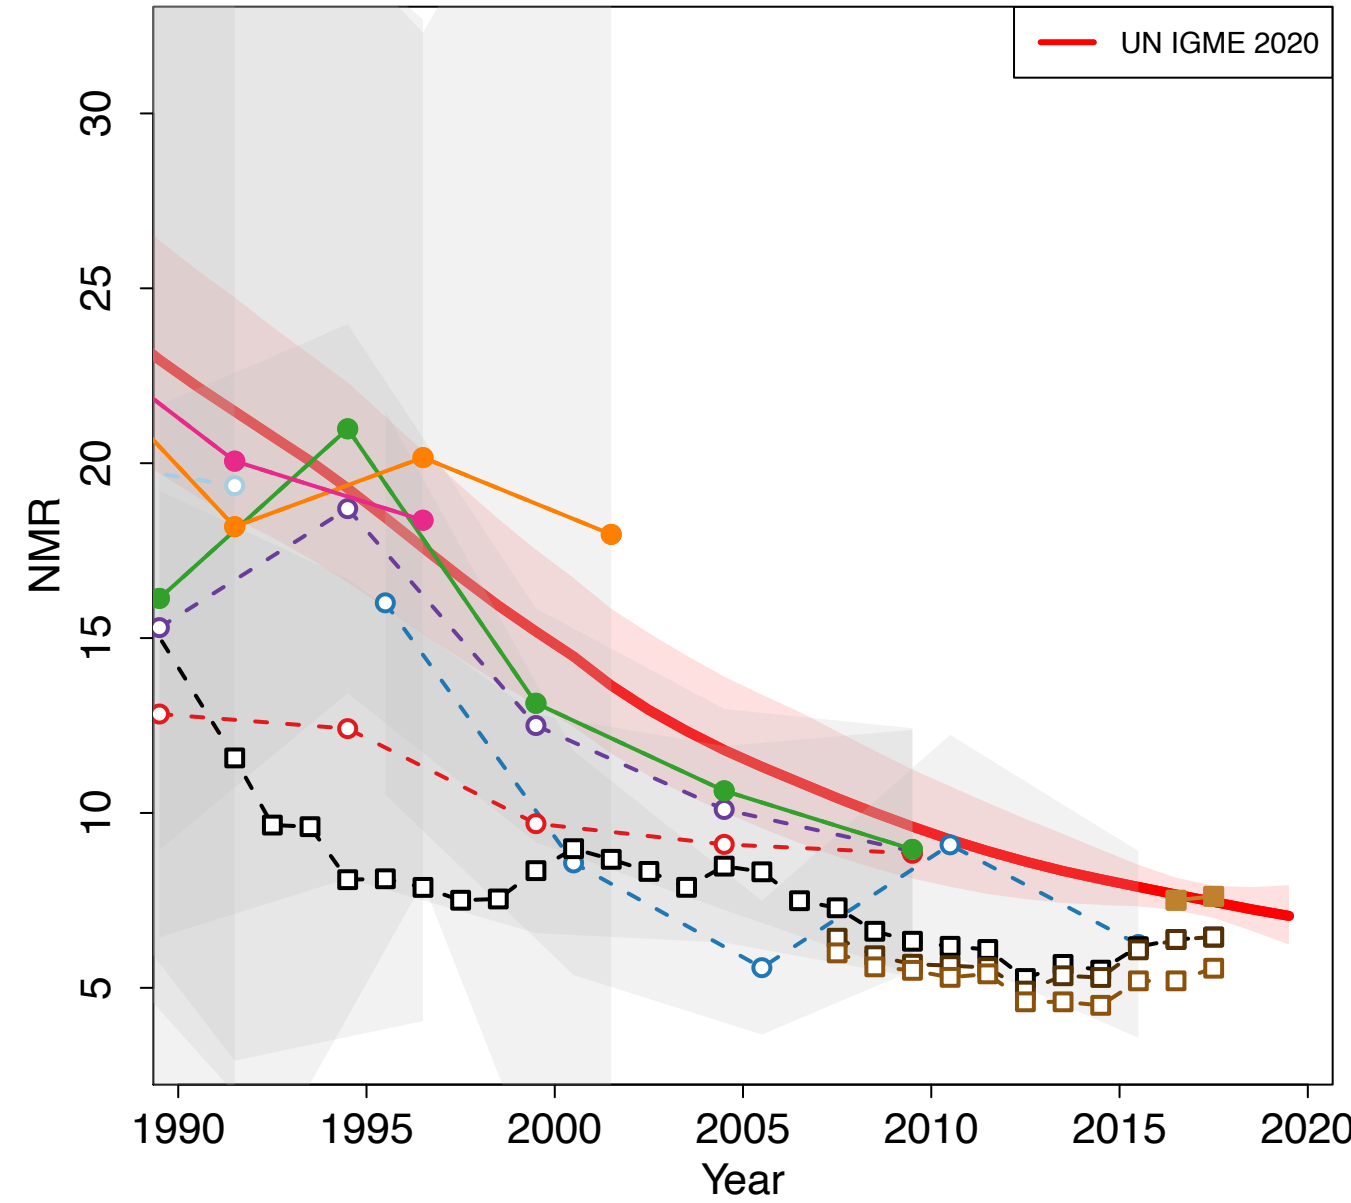

- World Fertility Survey 1979–1980 (Other DHS)
- Demographic and Family Health Survey 1987 (DHS)
- Demographic and Maternal and Child Health Survey 1989 (Others)
- Demographic and Maternal and Child Health Survey 1994 (Others)
- Demographic and Maternal and Child Health Survey 1999 (Others)
- Demographic and Maternal and Child Health Survey 2004 (Others)
- National Health and Nutrition Survey 2012 (Others)
- National Health and Nutrition Survey, Imputed birth 2012 (Others)
- National Health and Nutrition Survey, Imputed birth and deaths 2012 (Others)
- National Health and Nutrition Survey 2018 (Others)
- VR Adjusted Vital Registration (Live Births)
- VR Vital Registration (Population projections)
- VR Vital Registration (Live births)
- VR WHO

# Egypt

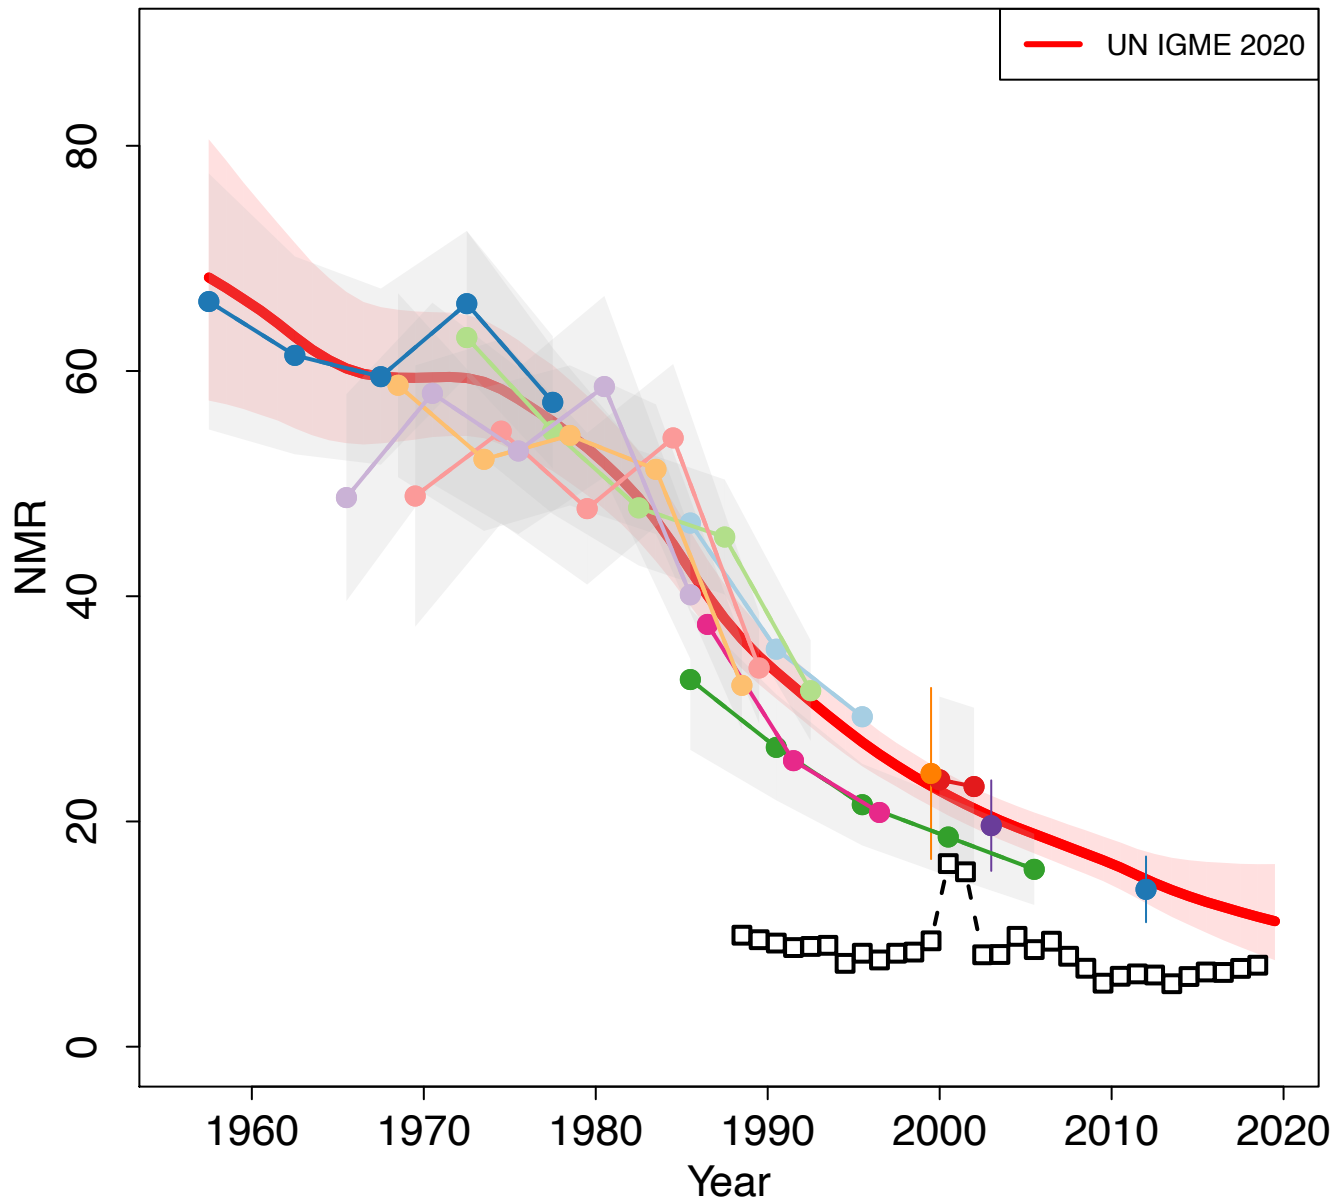

# Zoomed in

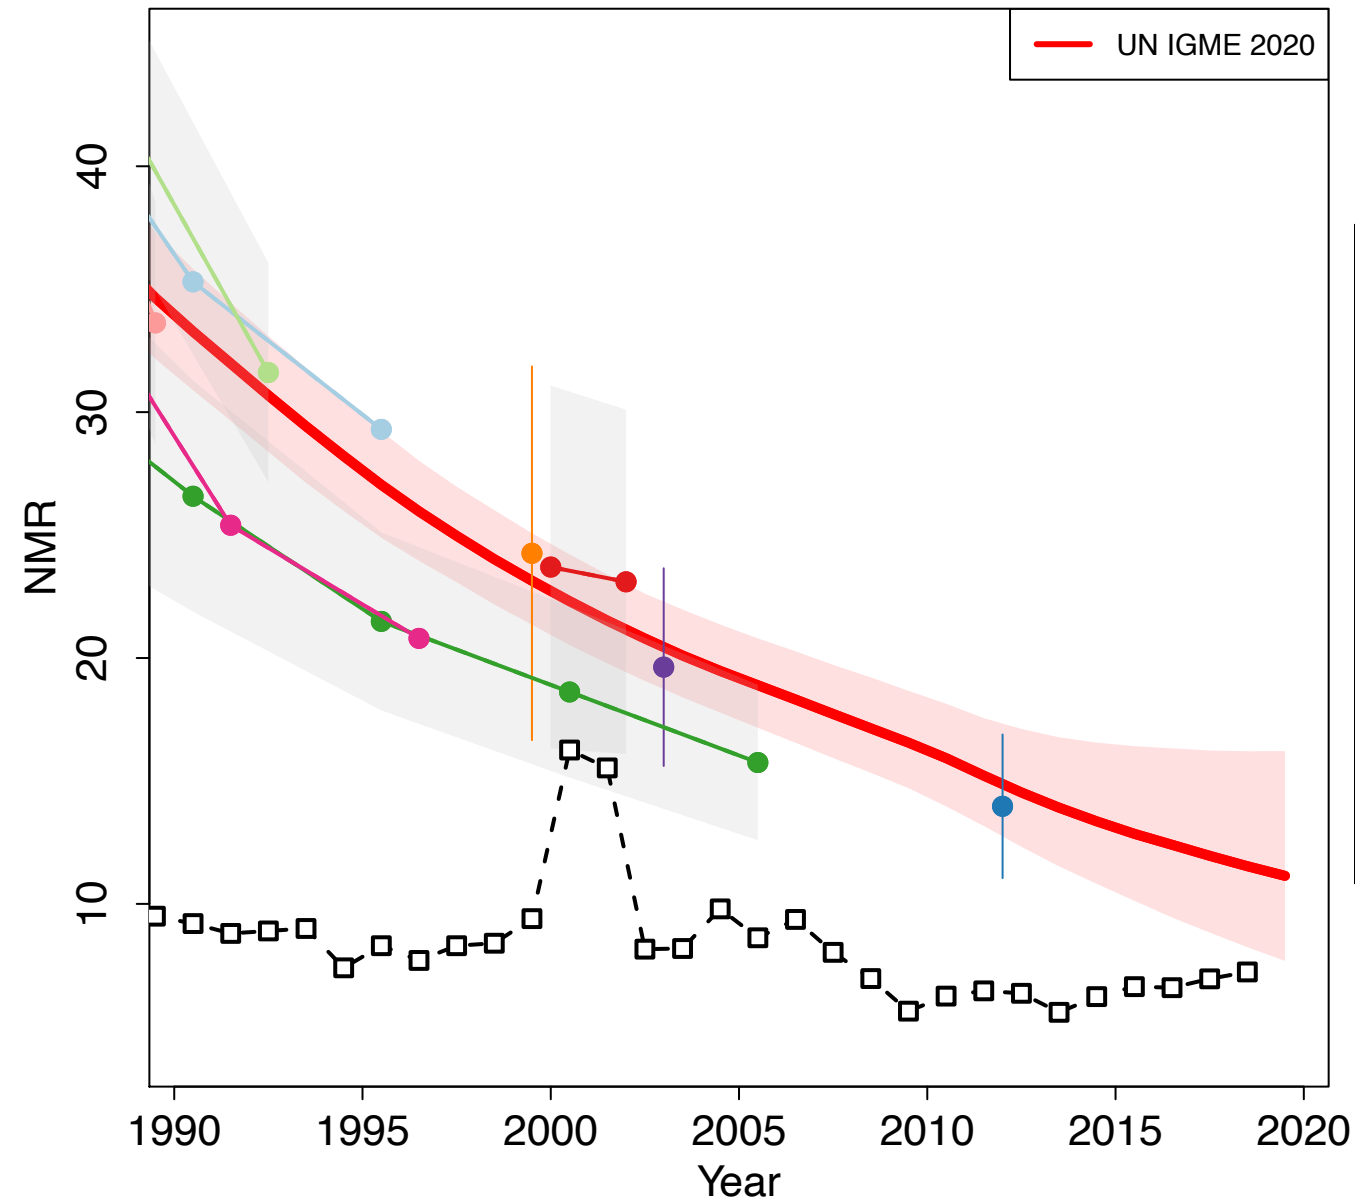

- World Fertility Survey 1980 (Other DHS)
- Demographic and Health Survey 1988 (DHS)
- PAPCHILD Maternal and Child Health Survey 1991 (Others)
- Demographic and Health Survey 1992 (DHS)
- Demographic and Health Survey 1995 (DHS)
- Demographic and Health Survey 1997 (Other DHS)
- Demographic and Health Survey 1998 (Other DHS)
- Demographic and Health Survey 2000 (DHS)
- Demographic and Health Survey 2003 (Other DHS)
- Demographic and Health Survey 2005 (DHS)
- Demographic and Health Survey 2008 (DHS)
- Demographic and Health Survey 2014 (DHS)
- VR WHO

# El Salvador

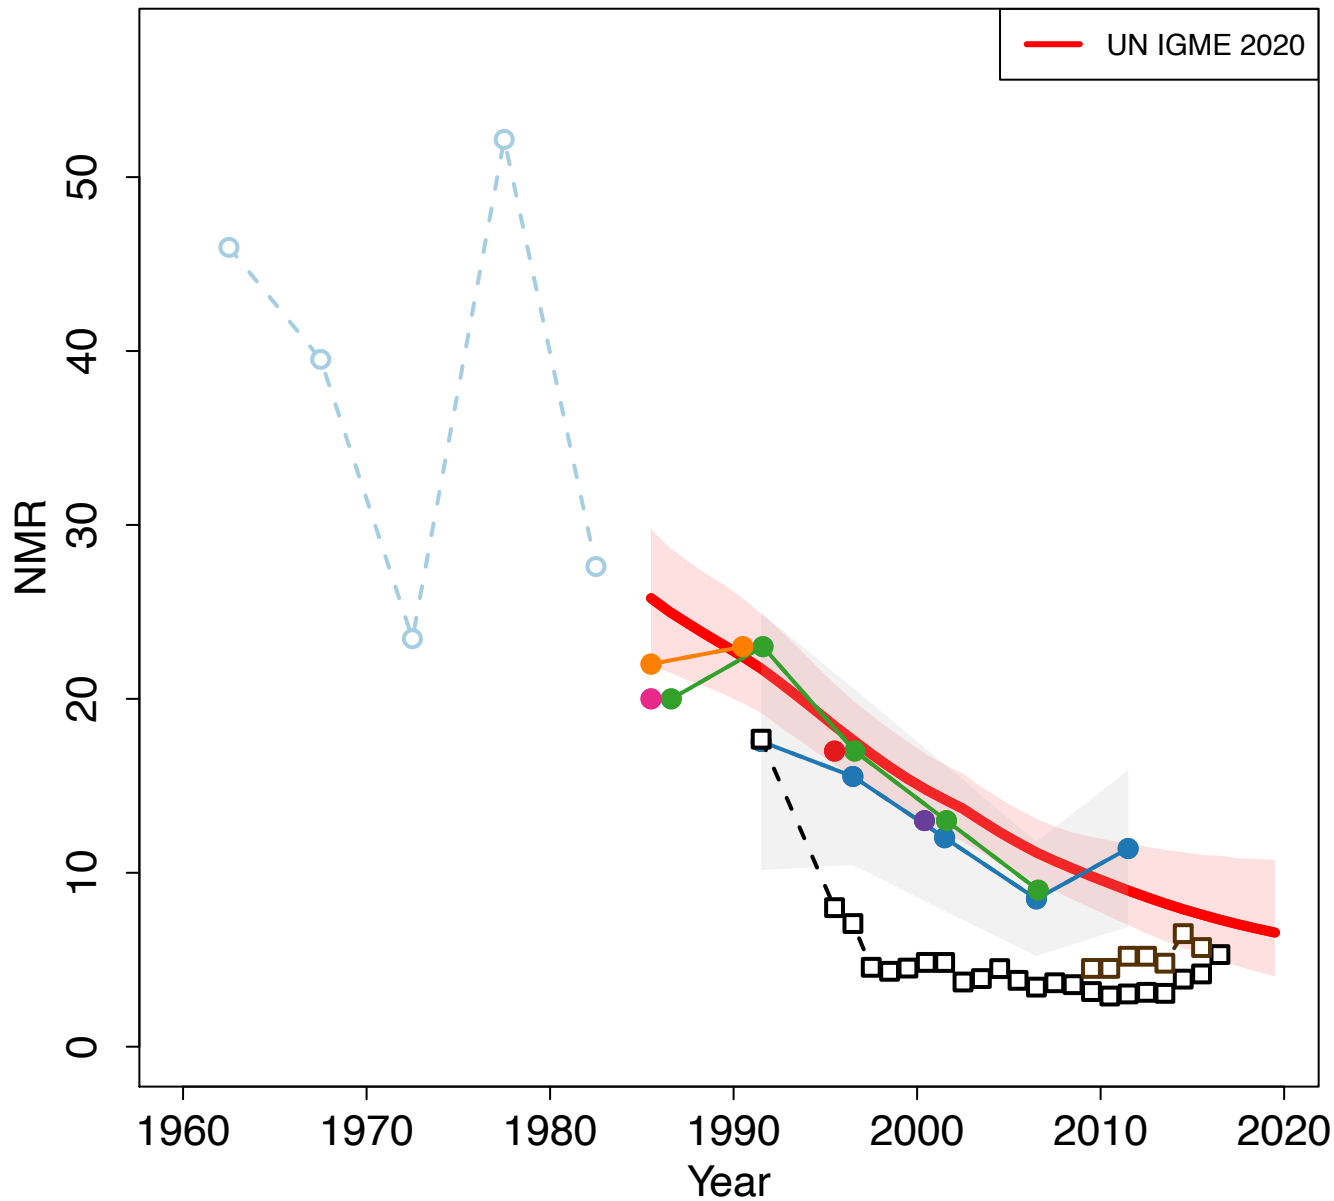

# Zoomed in

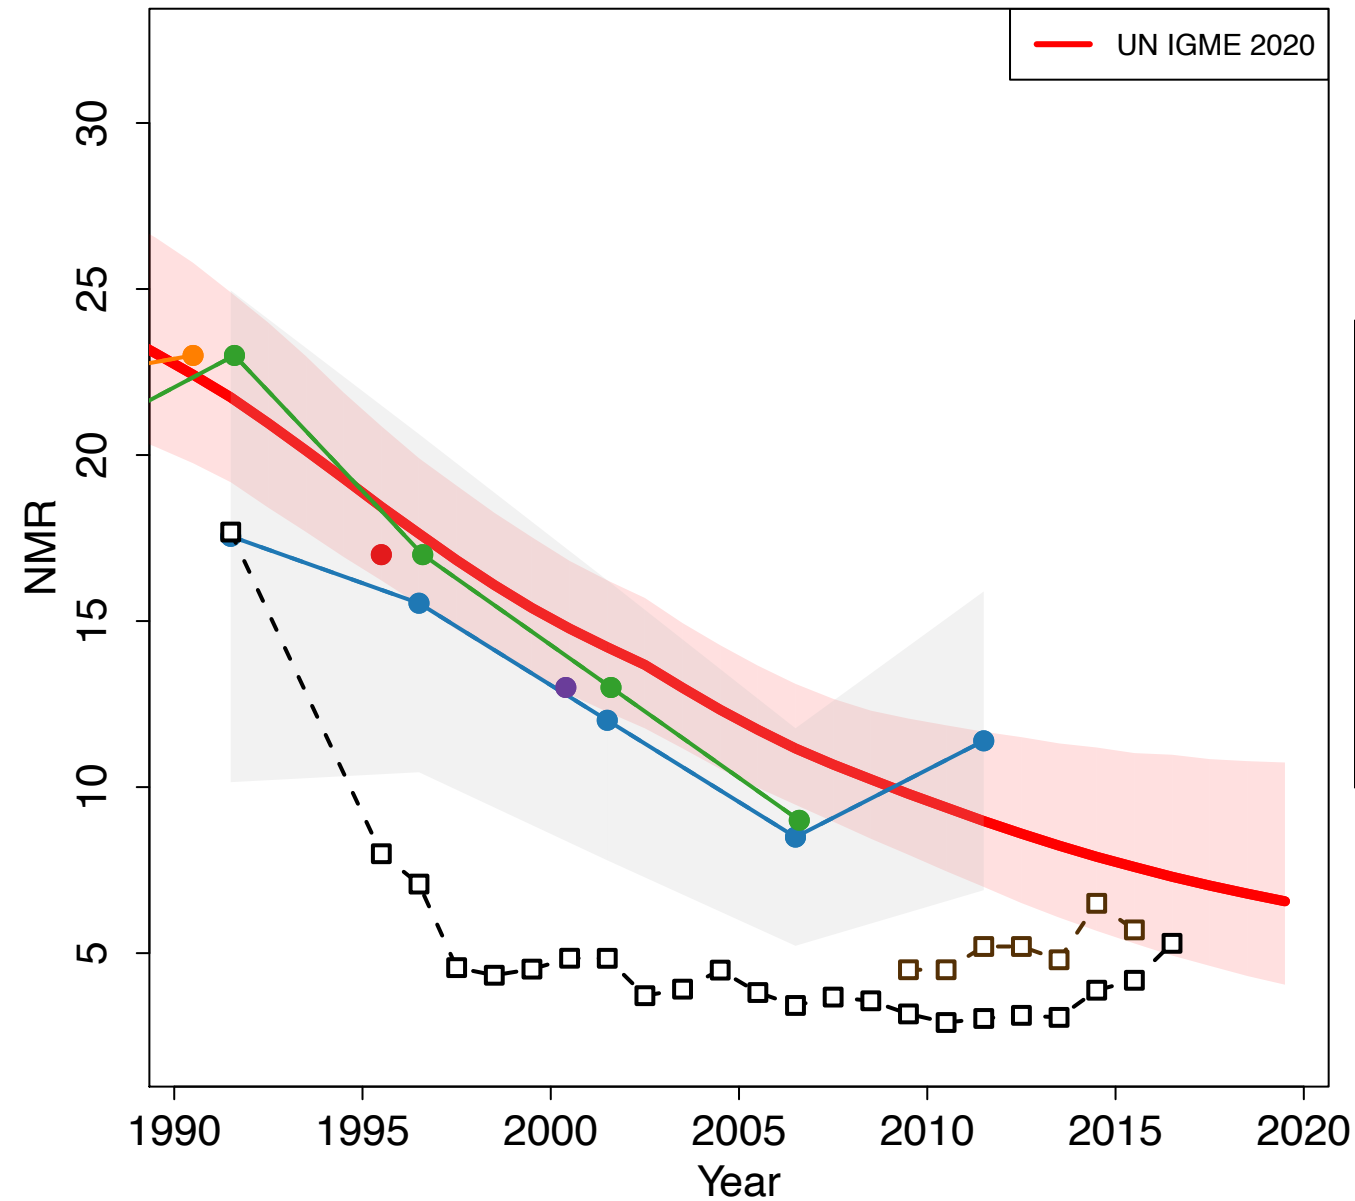

- National Family Health Survey 1985 (DHS)
- National Family Health Survey 1988 (Others)
- National Family Health Survey 1993 (Others)
- National Family Health Survey 1998 (Others)
- National Family Health Survey 2003 (Others)
- National Family Health Survey 2008 (Others)
- Multiple Indicator Cluster Survey 2014 (MICS)
- VR Vital Registration data from Informe de Labores Ministerio de Salud 2015-2016
- VR WHO

# Equatorial Guinea

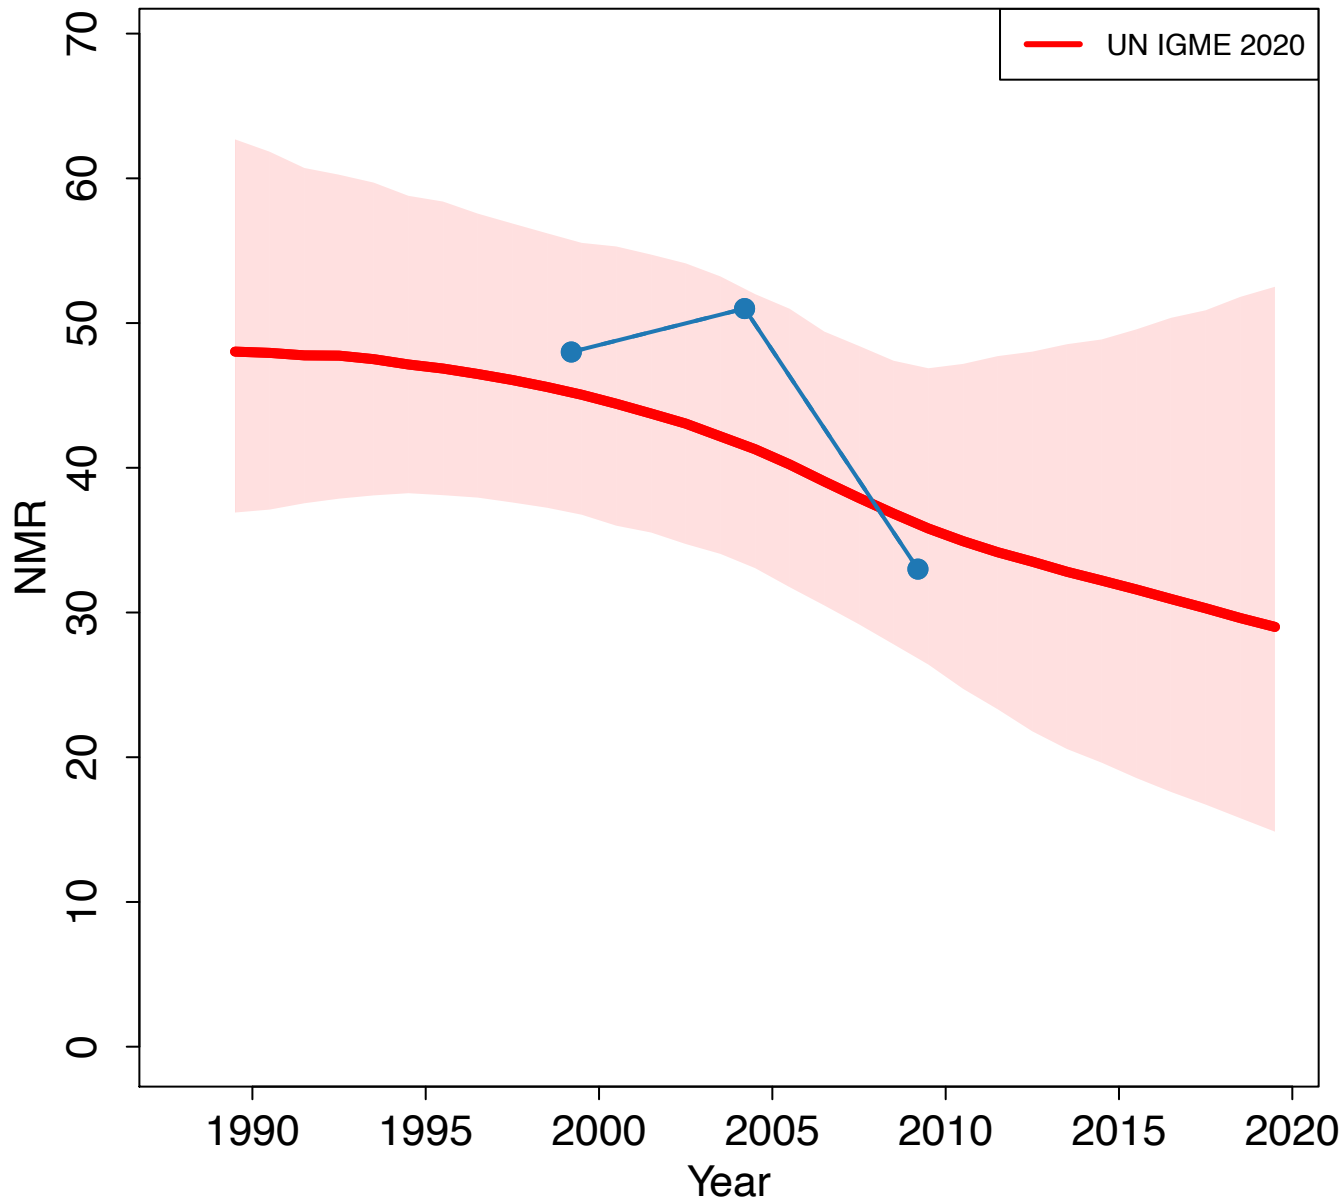

# Zoomed in

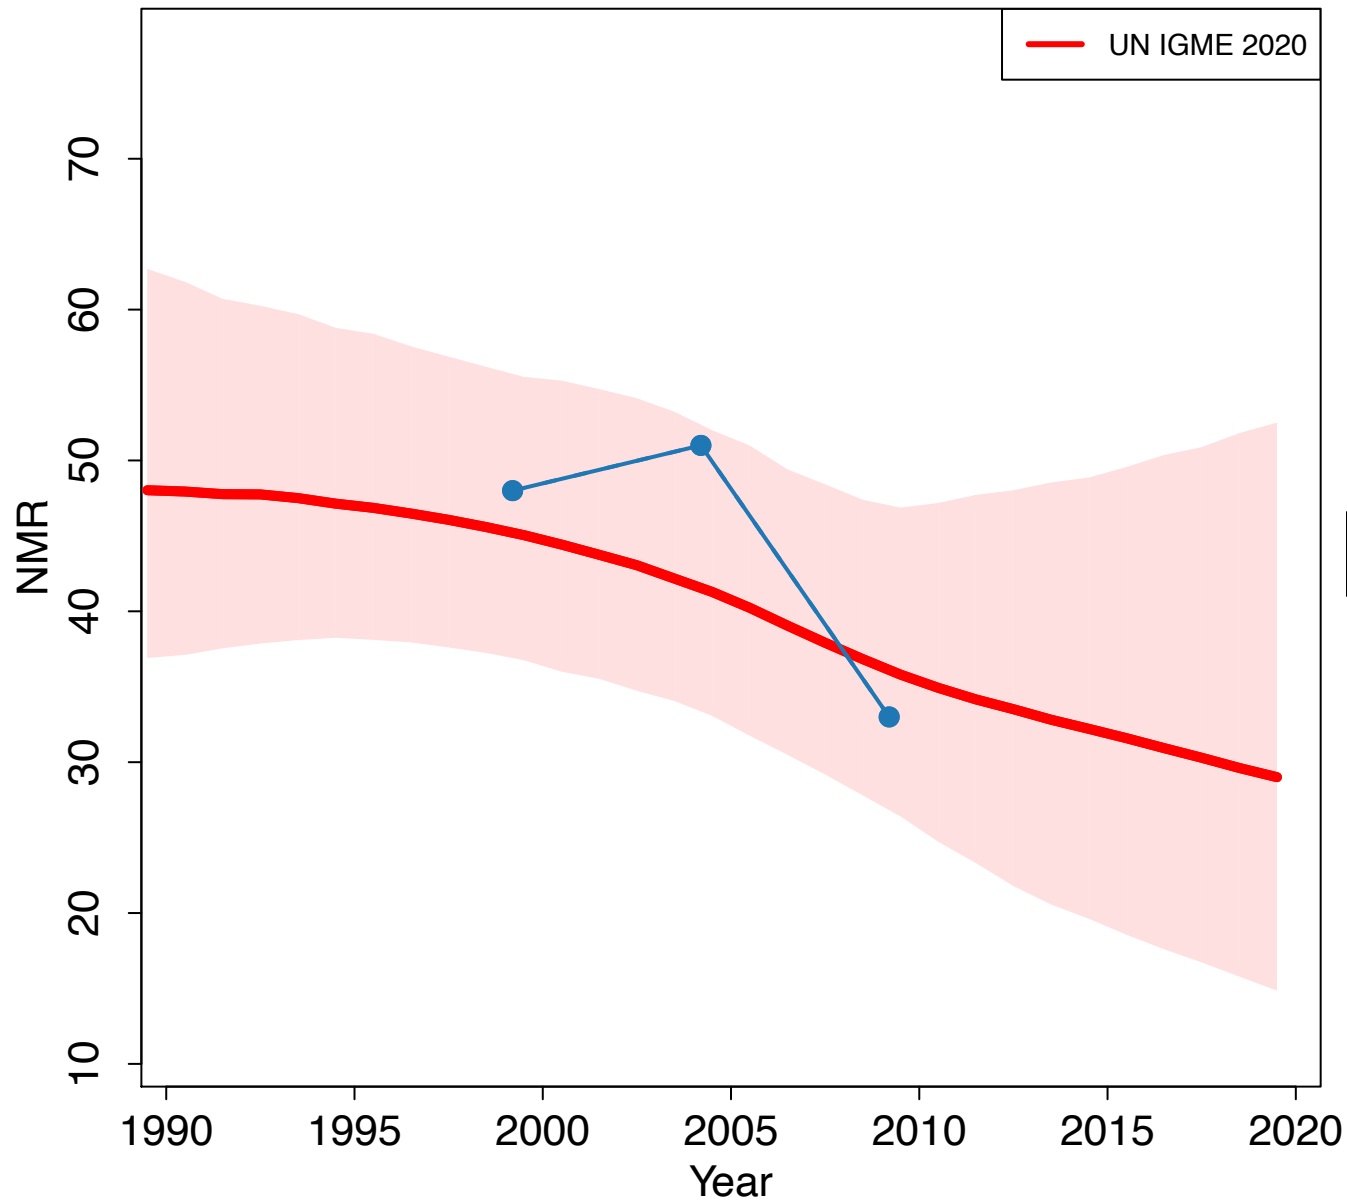

# Eritrea

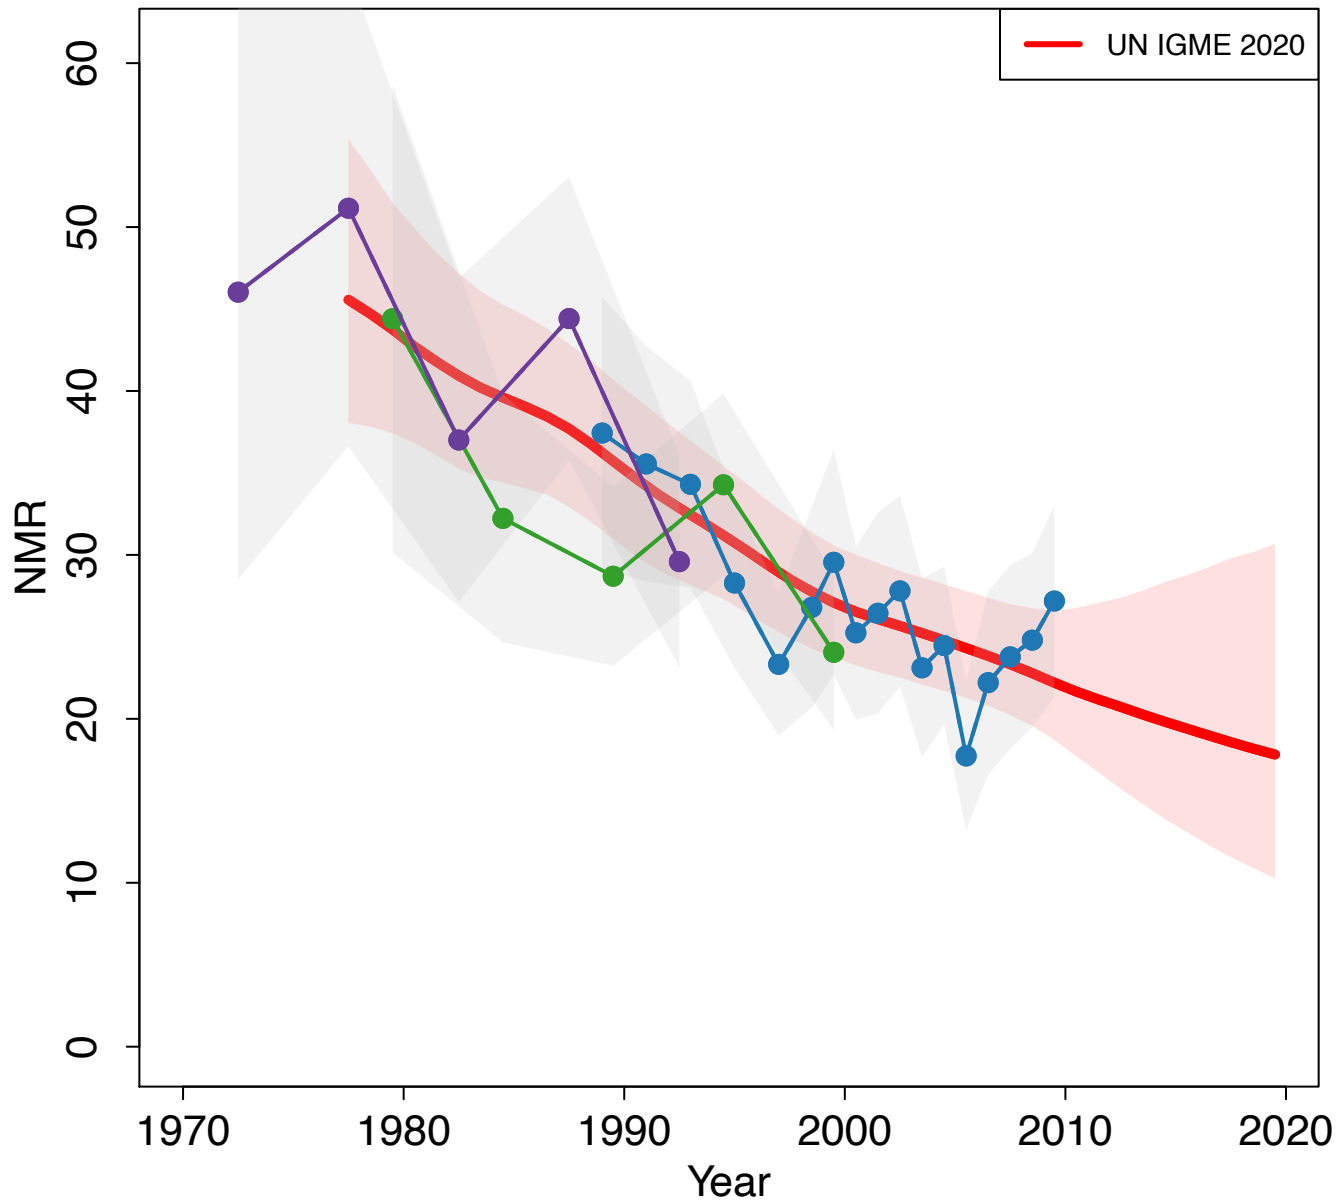

# Zoomed in

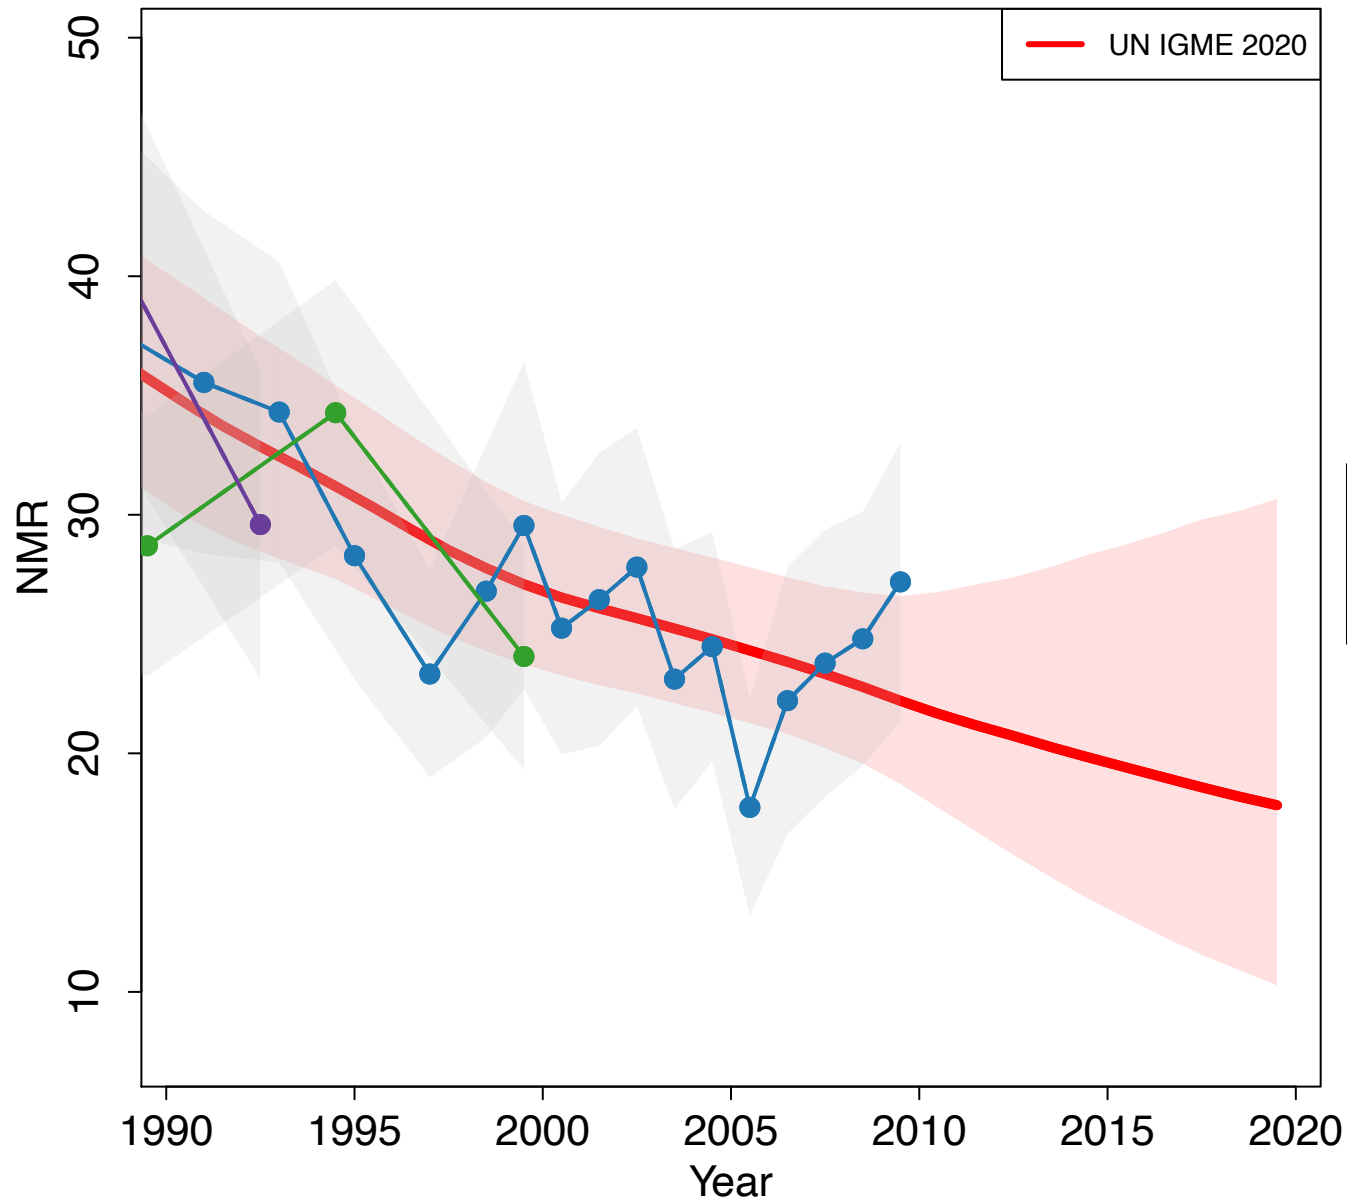

# Estonia

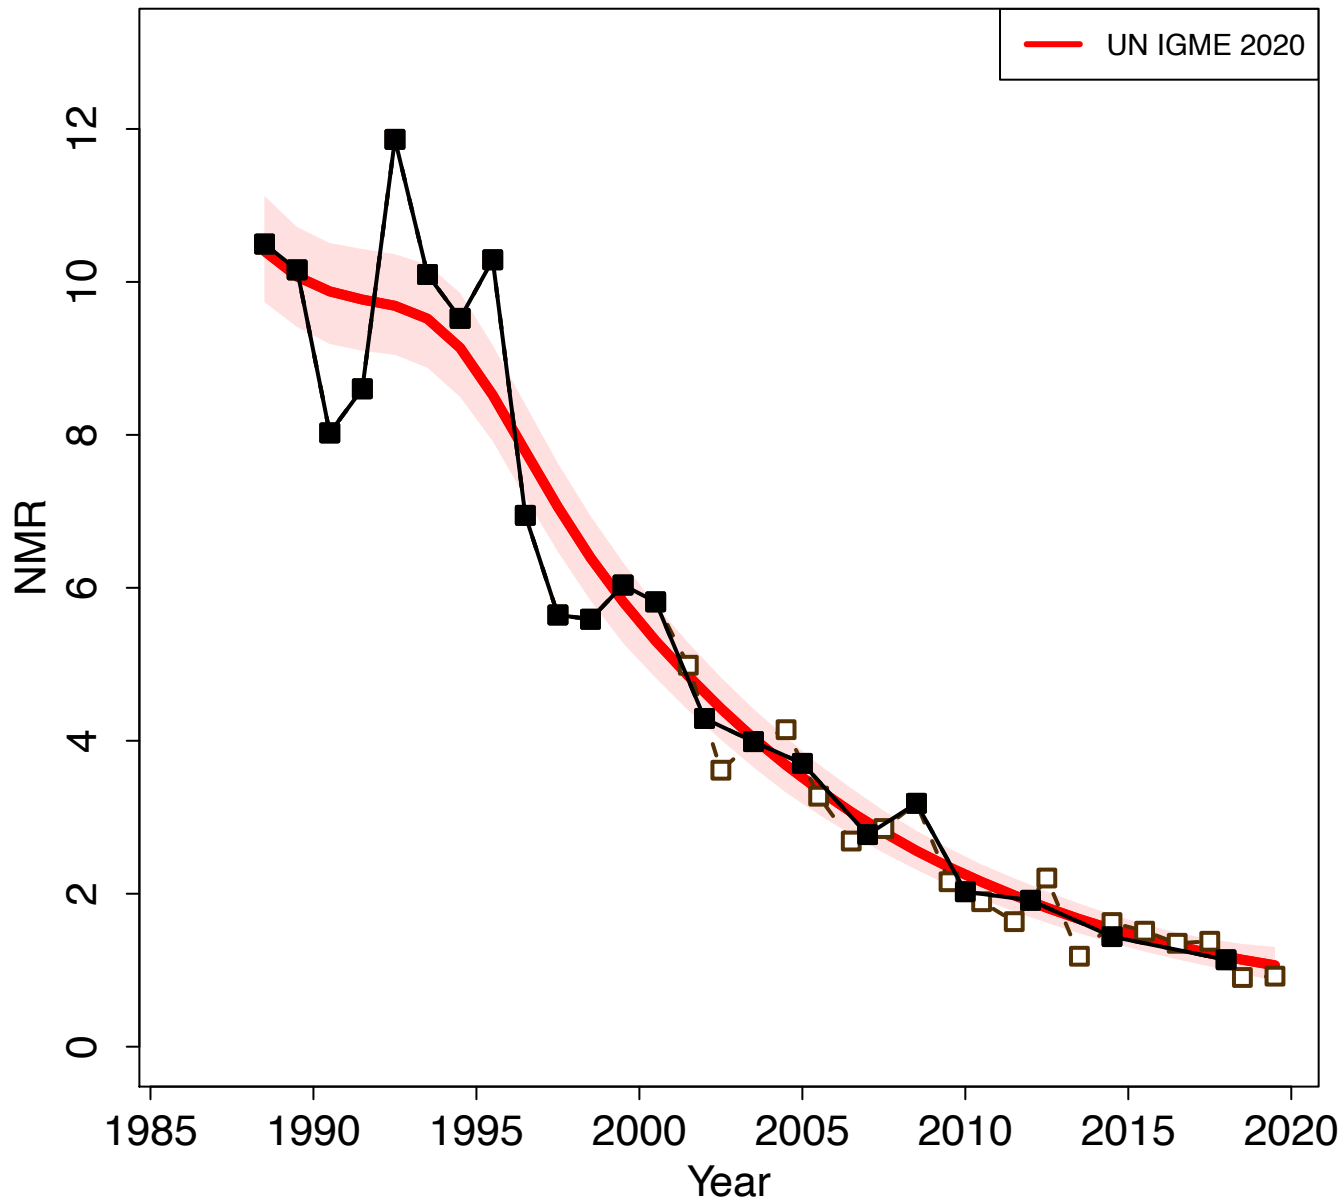

# Zoomed in

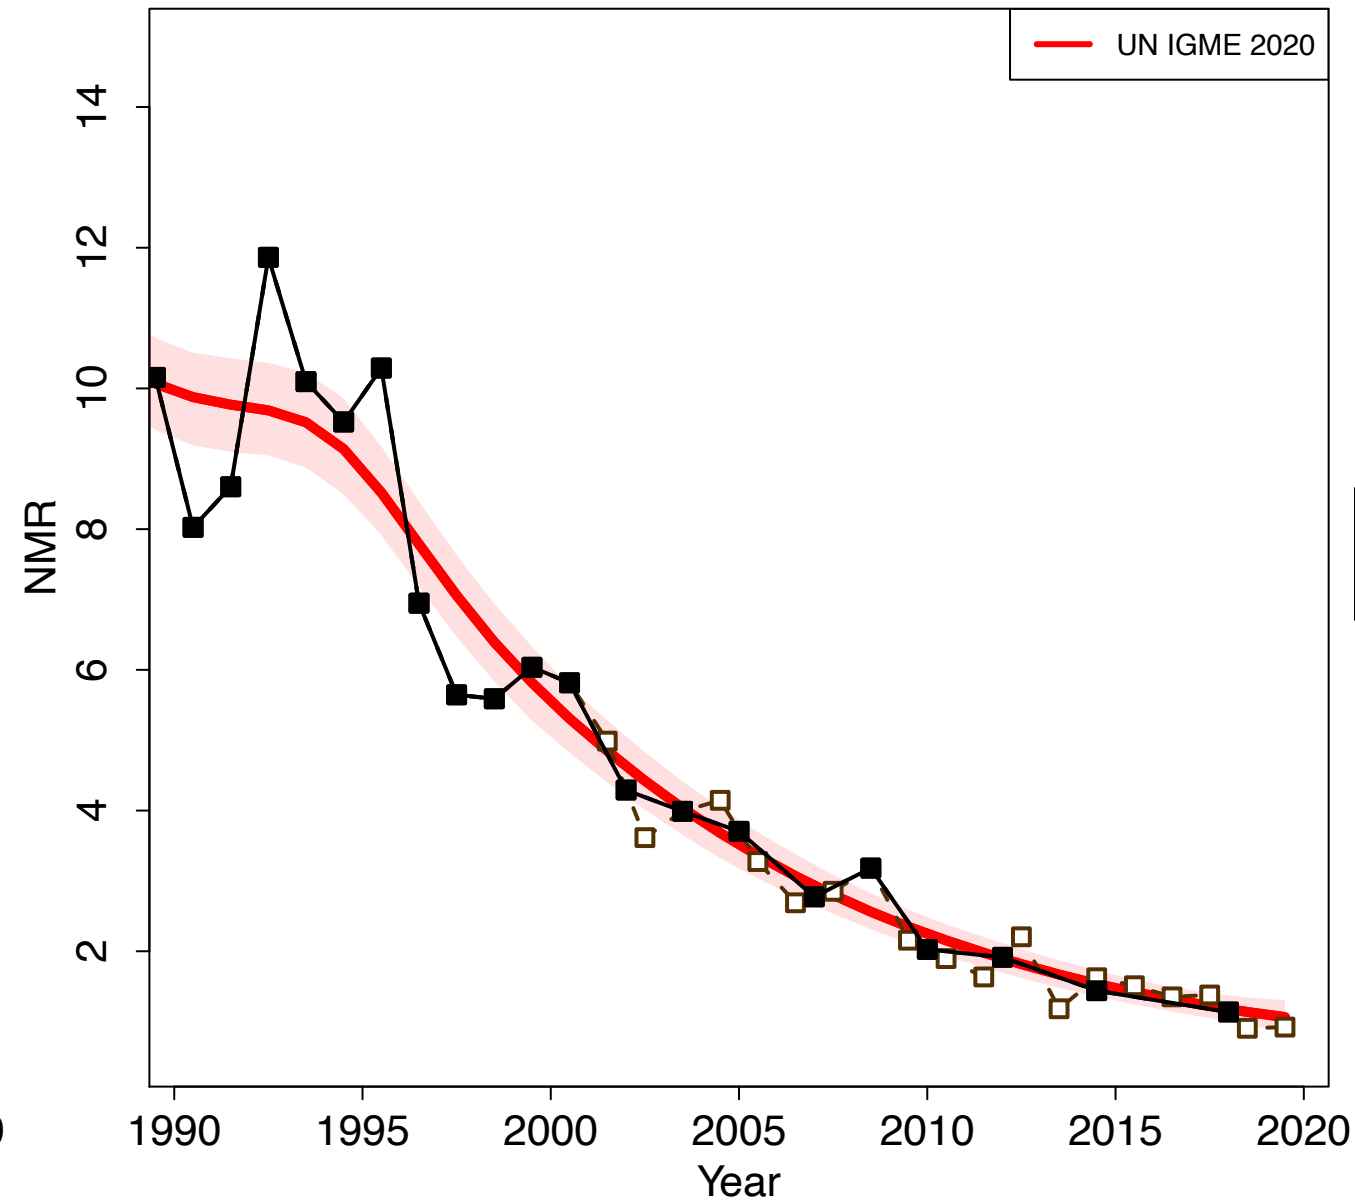

# Ethiopia

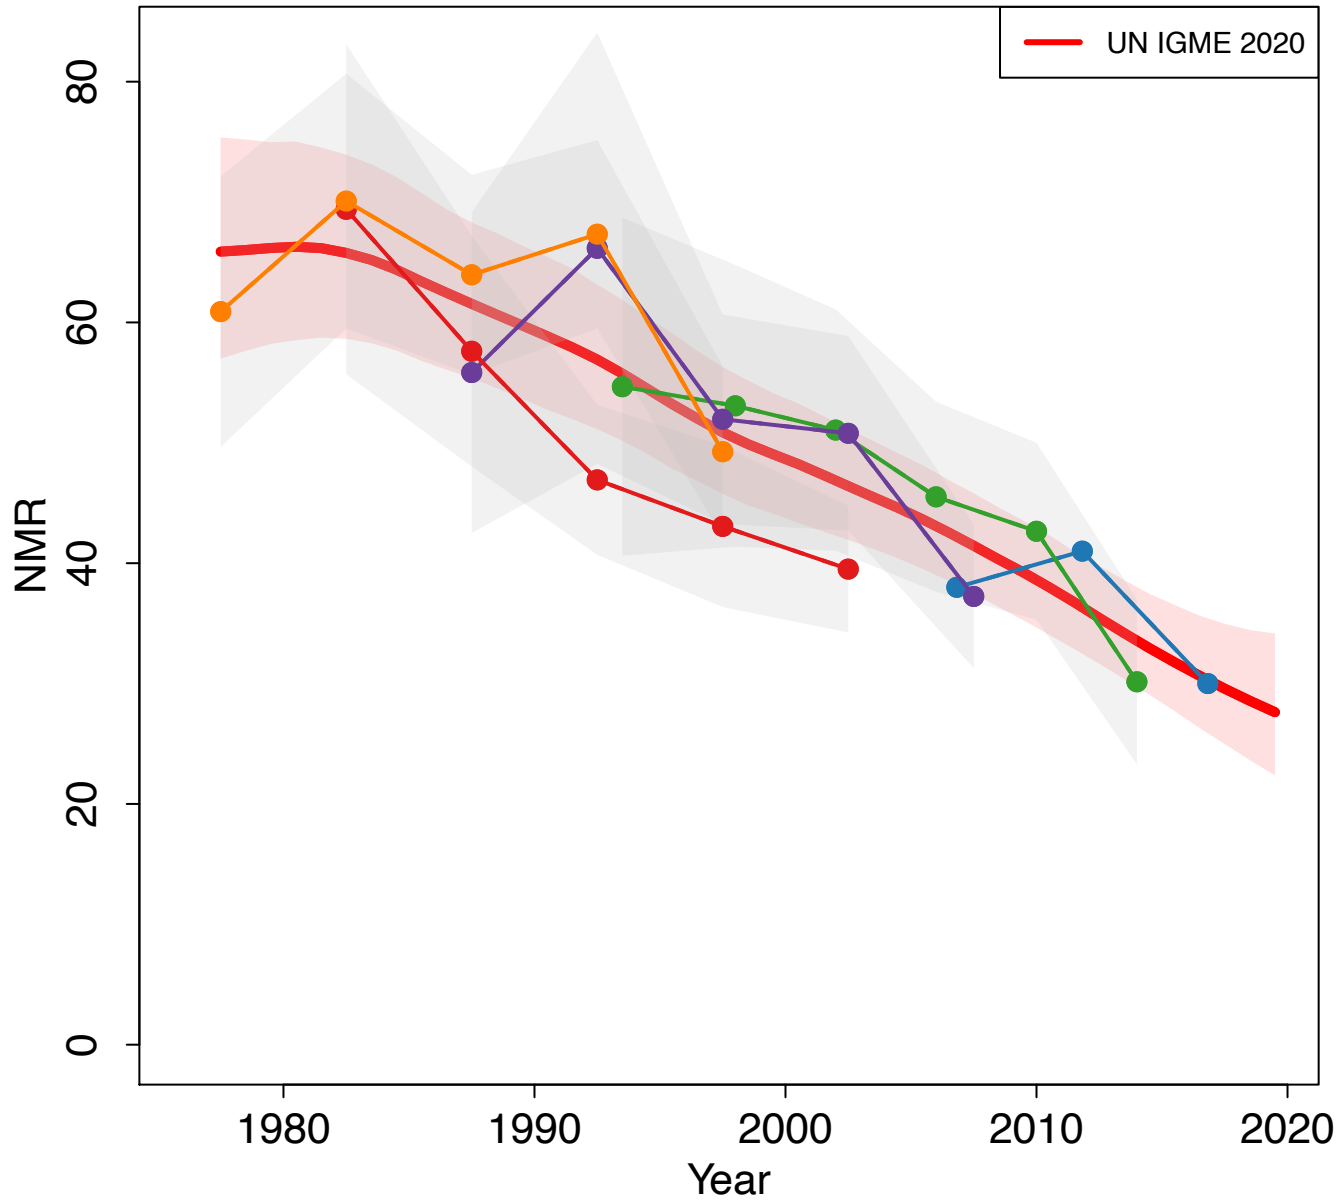

# Zoomed in

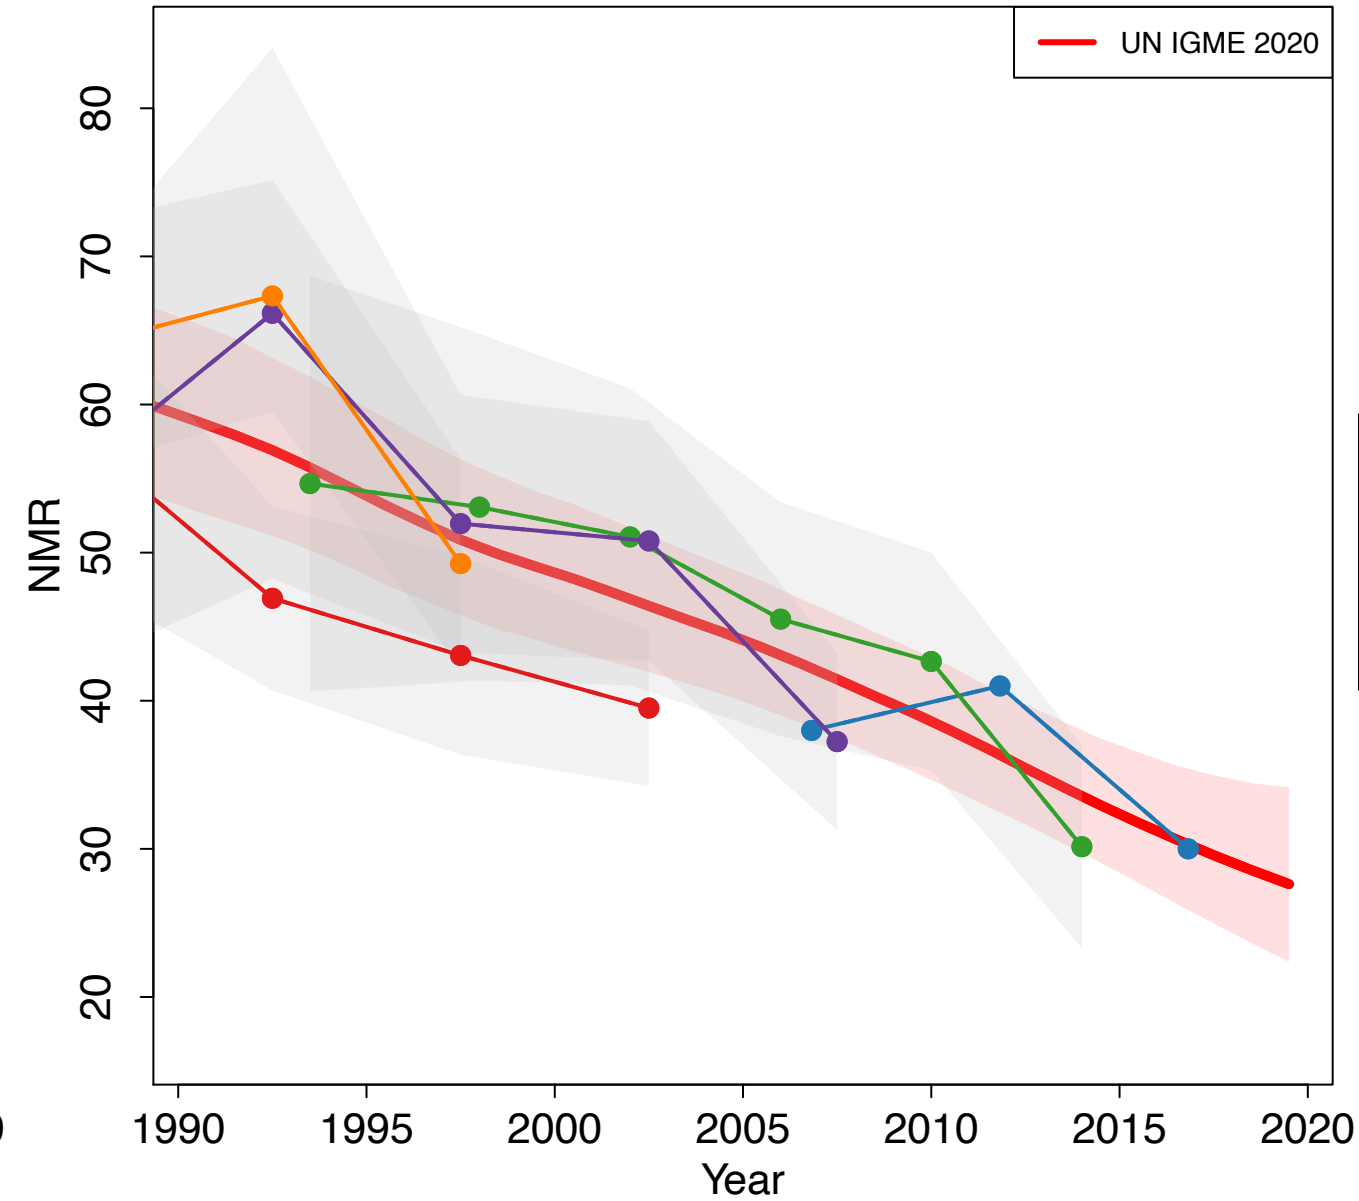

# Micronesia (Federated States of)

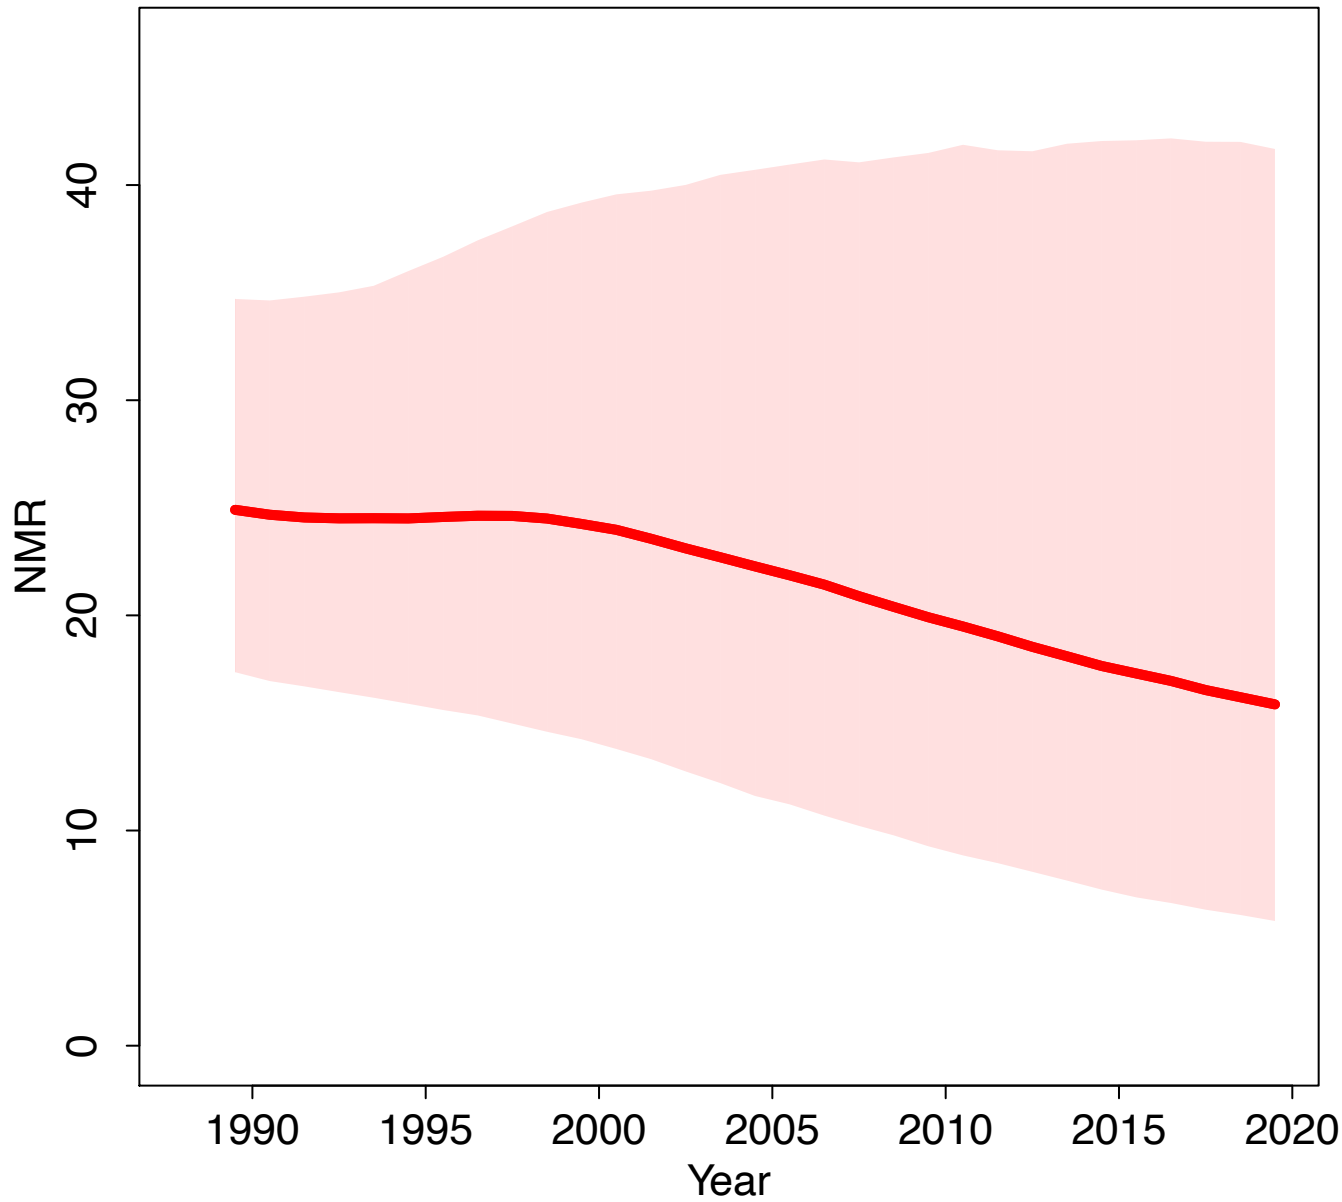

# Zoomed in

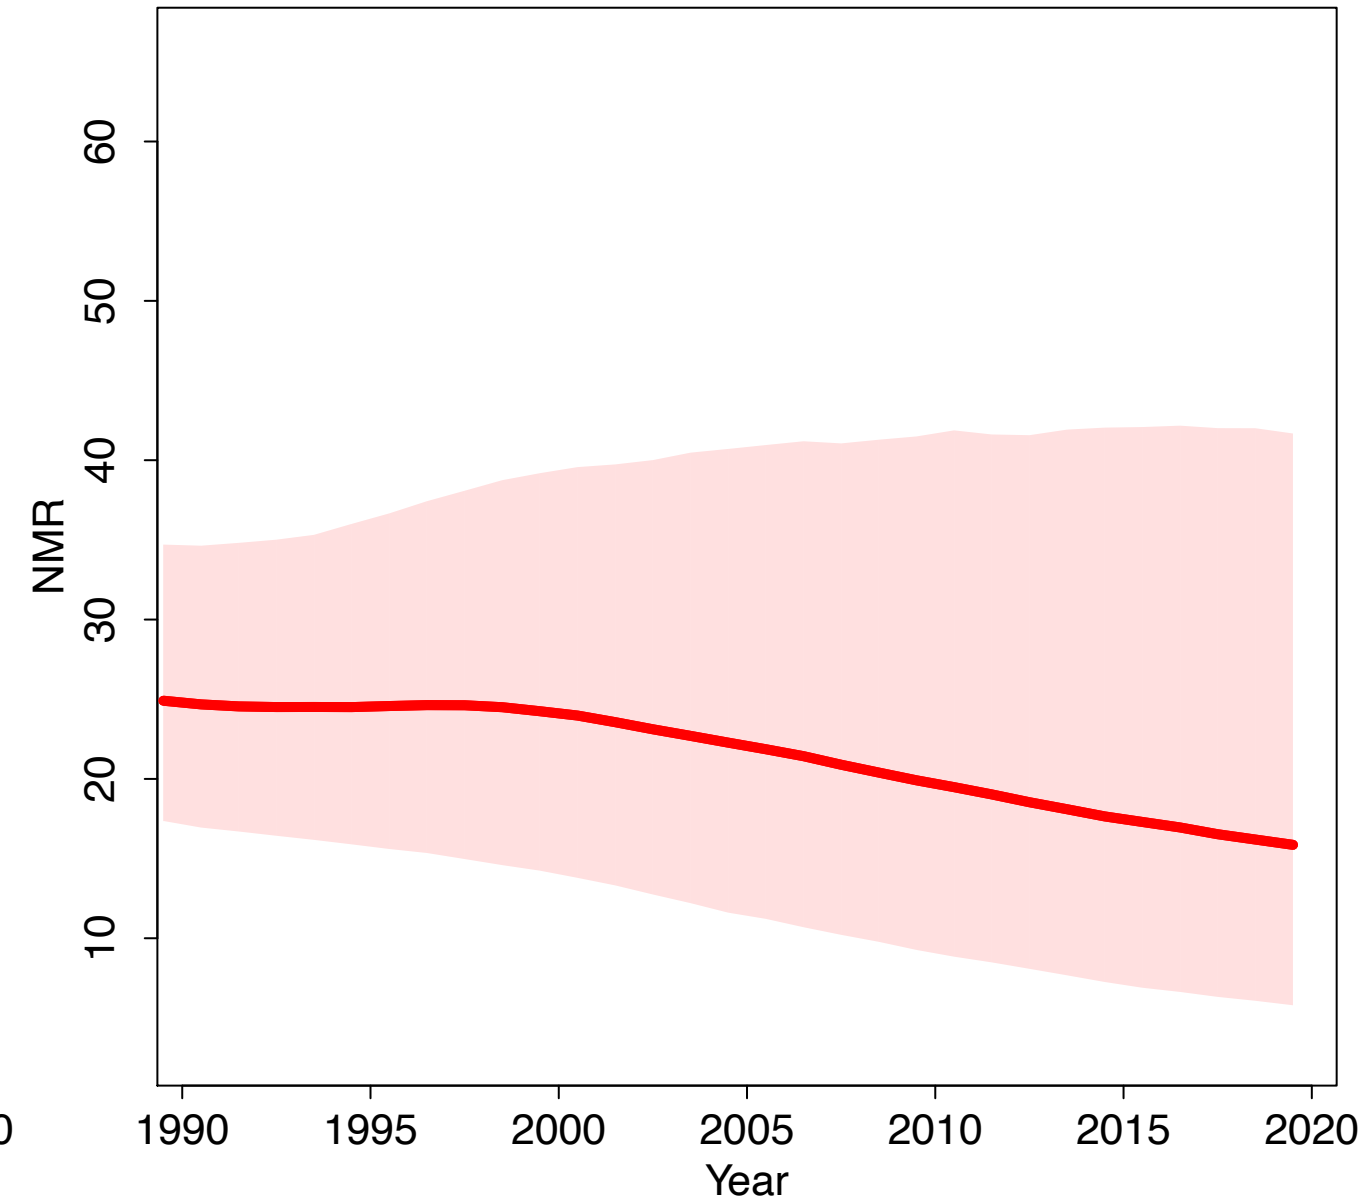



# Fiji

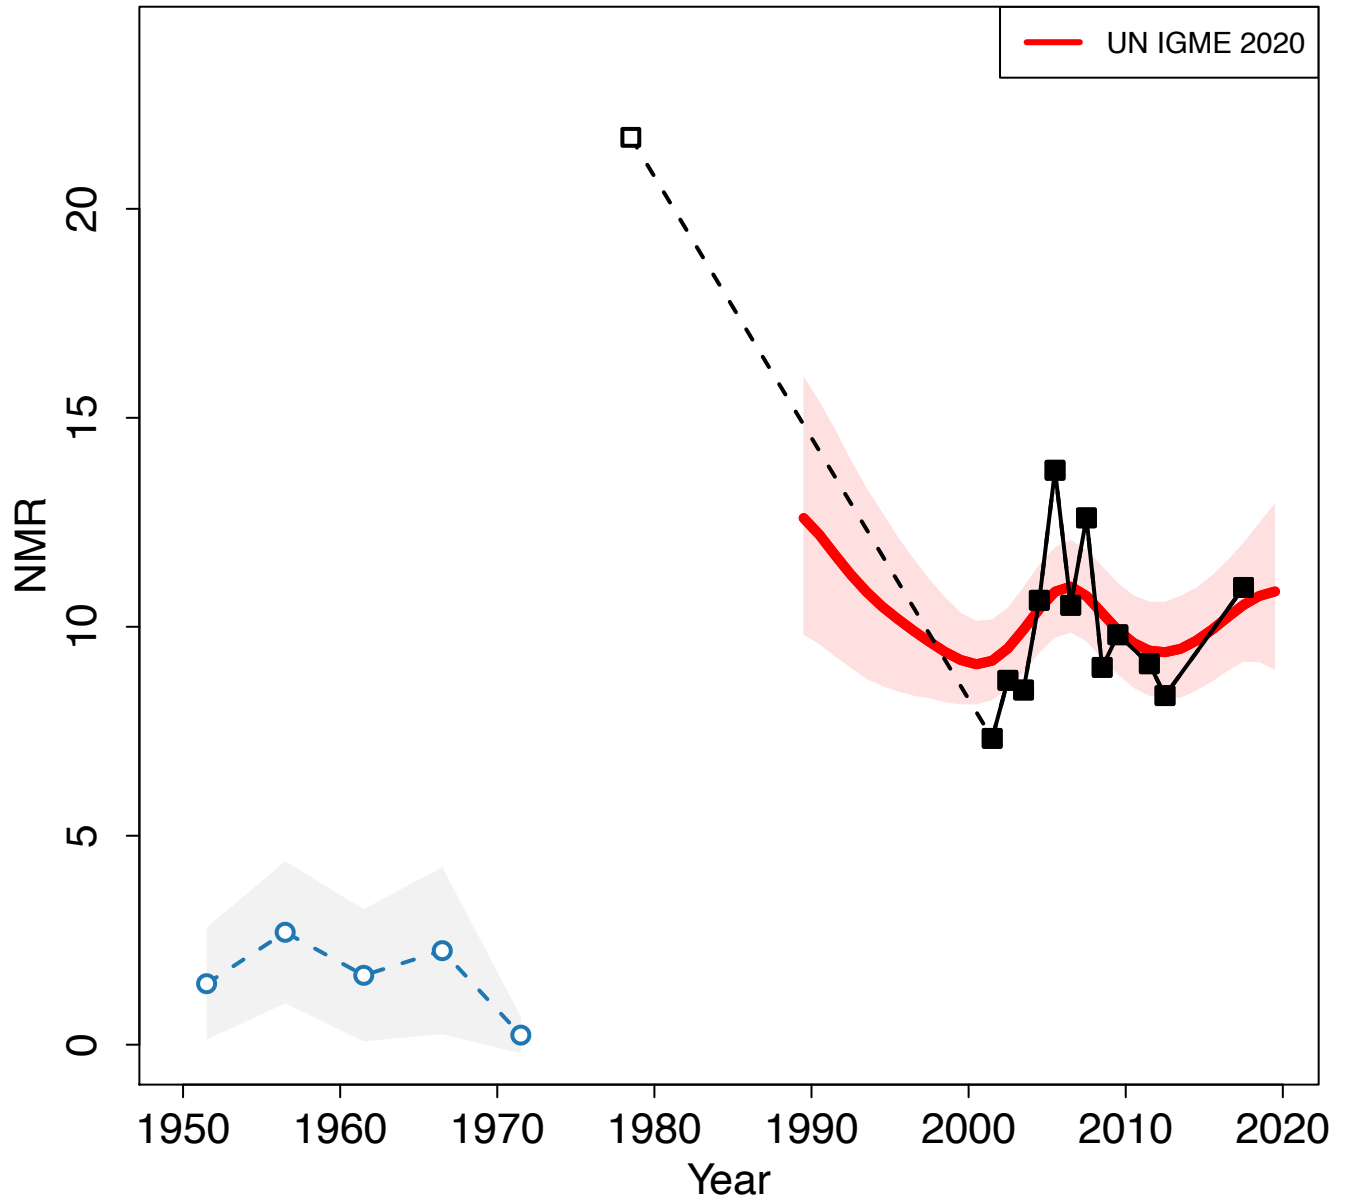

# Zoomed in

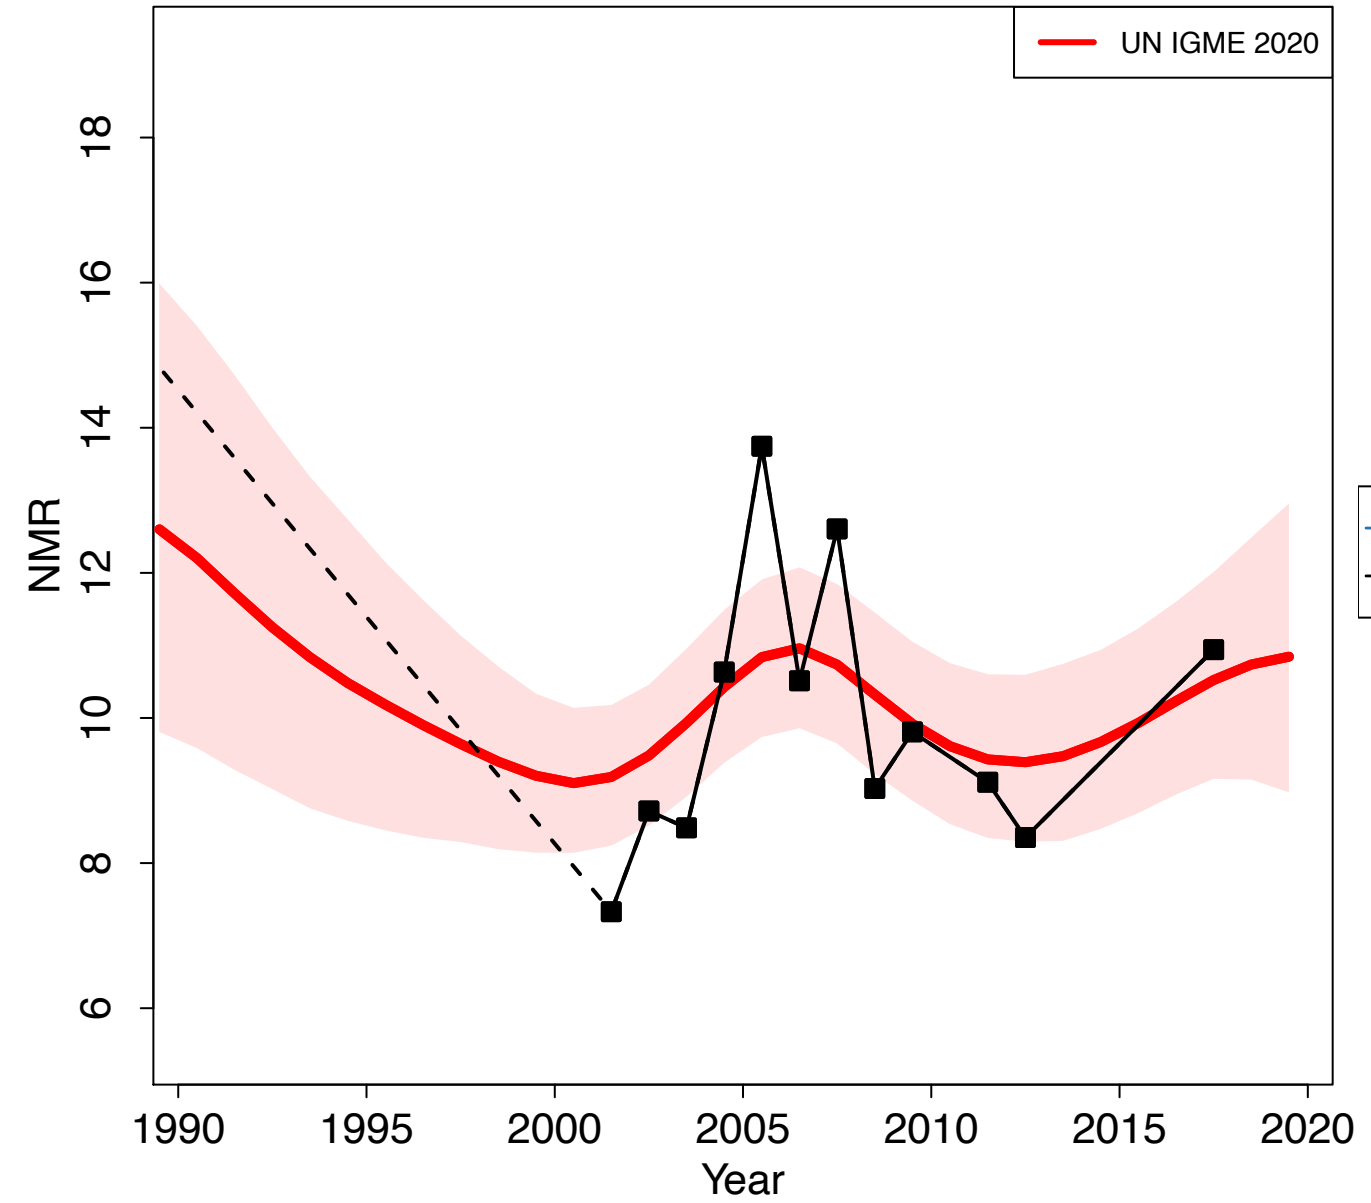

# Finland

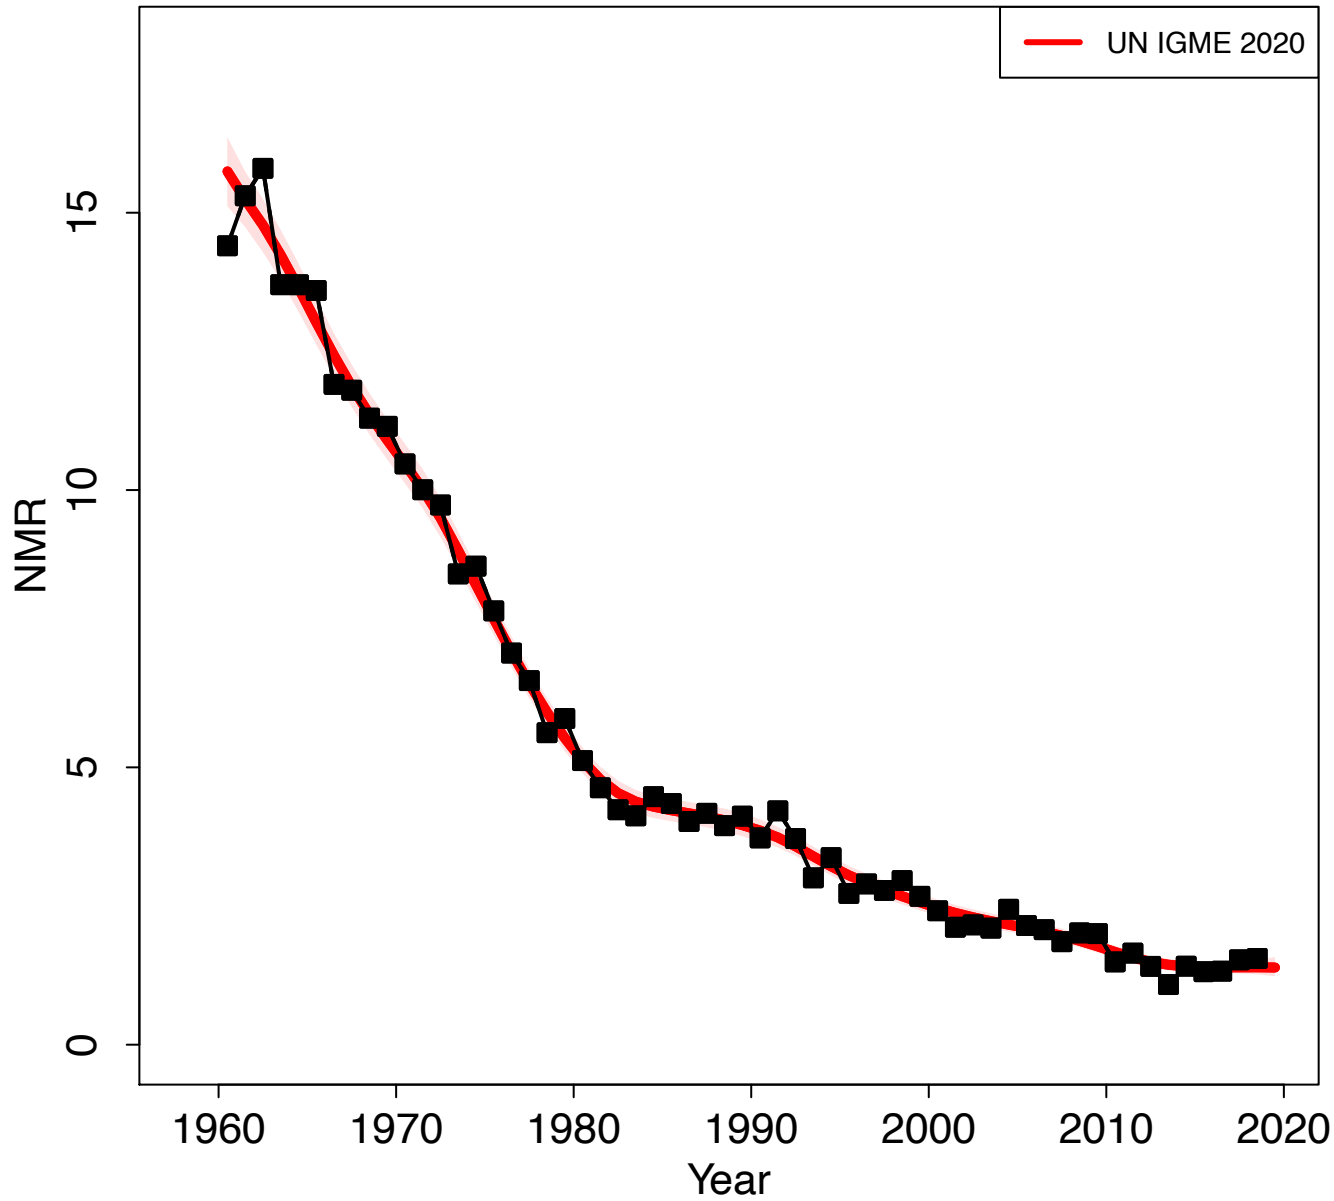

# Zoomed in

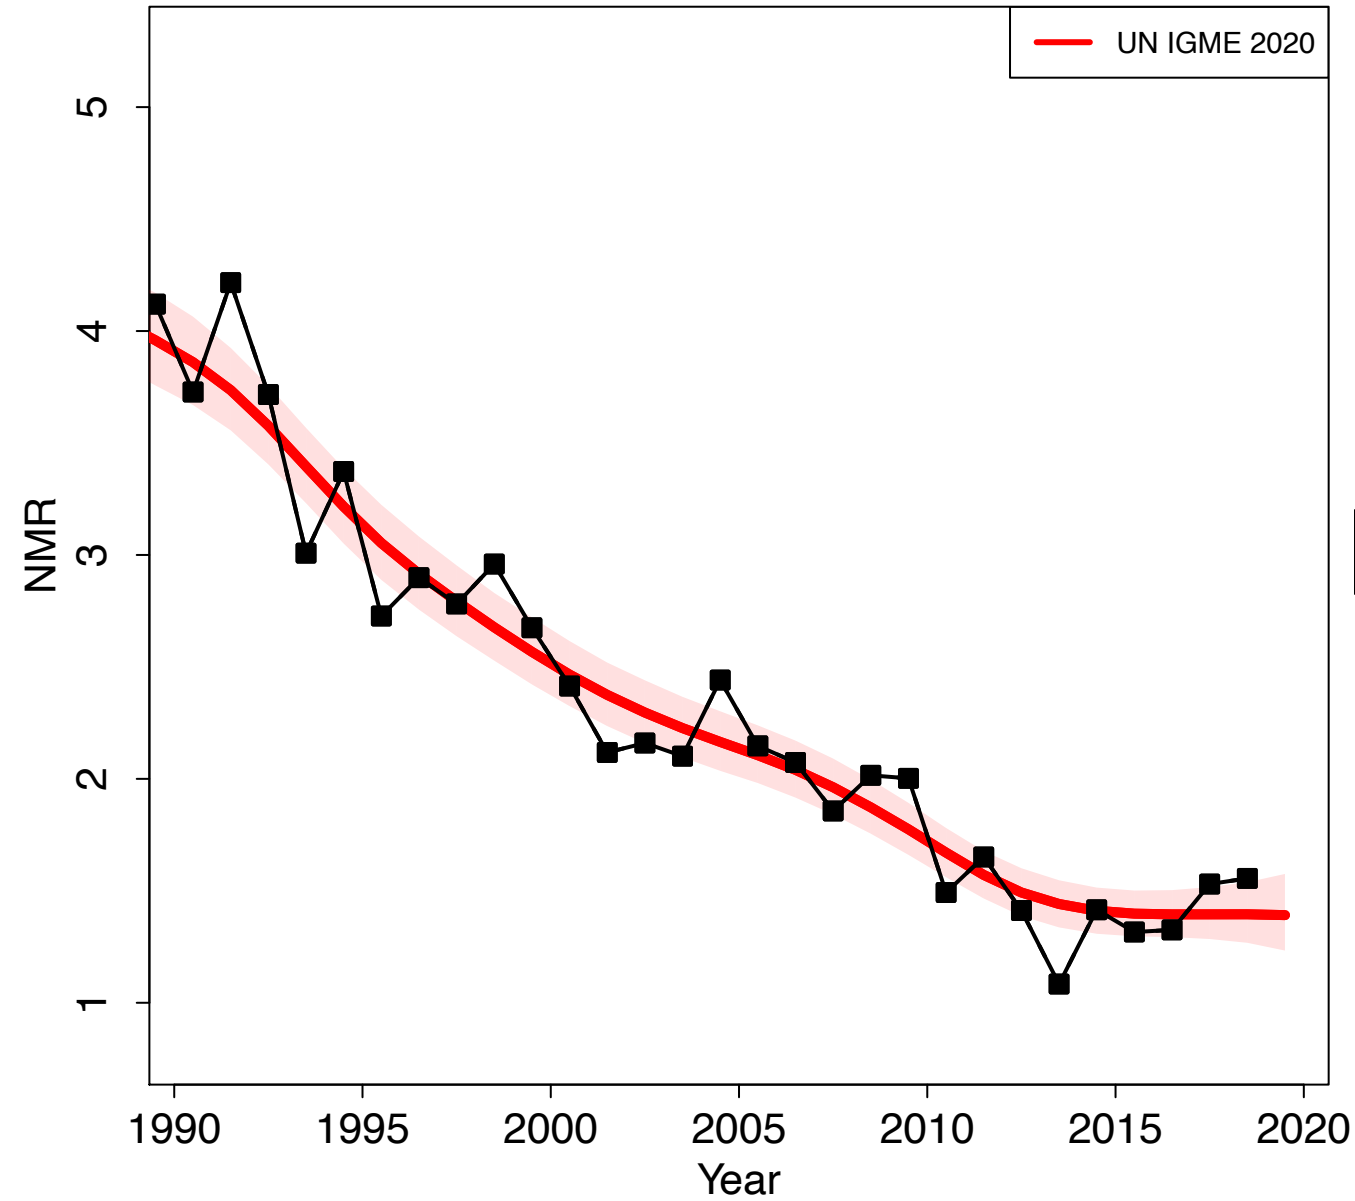

# France

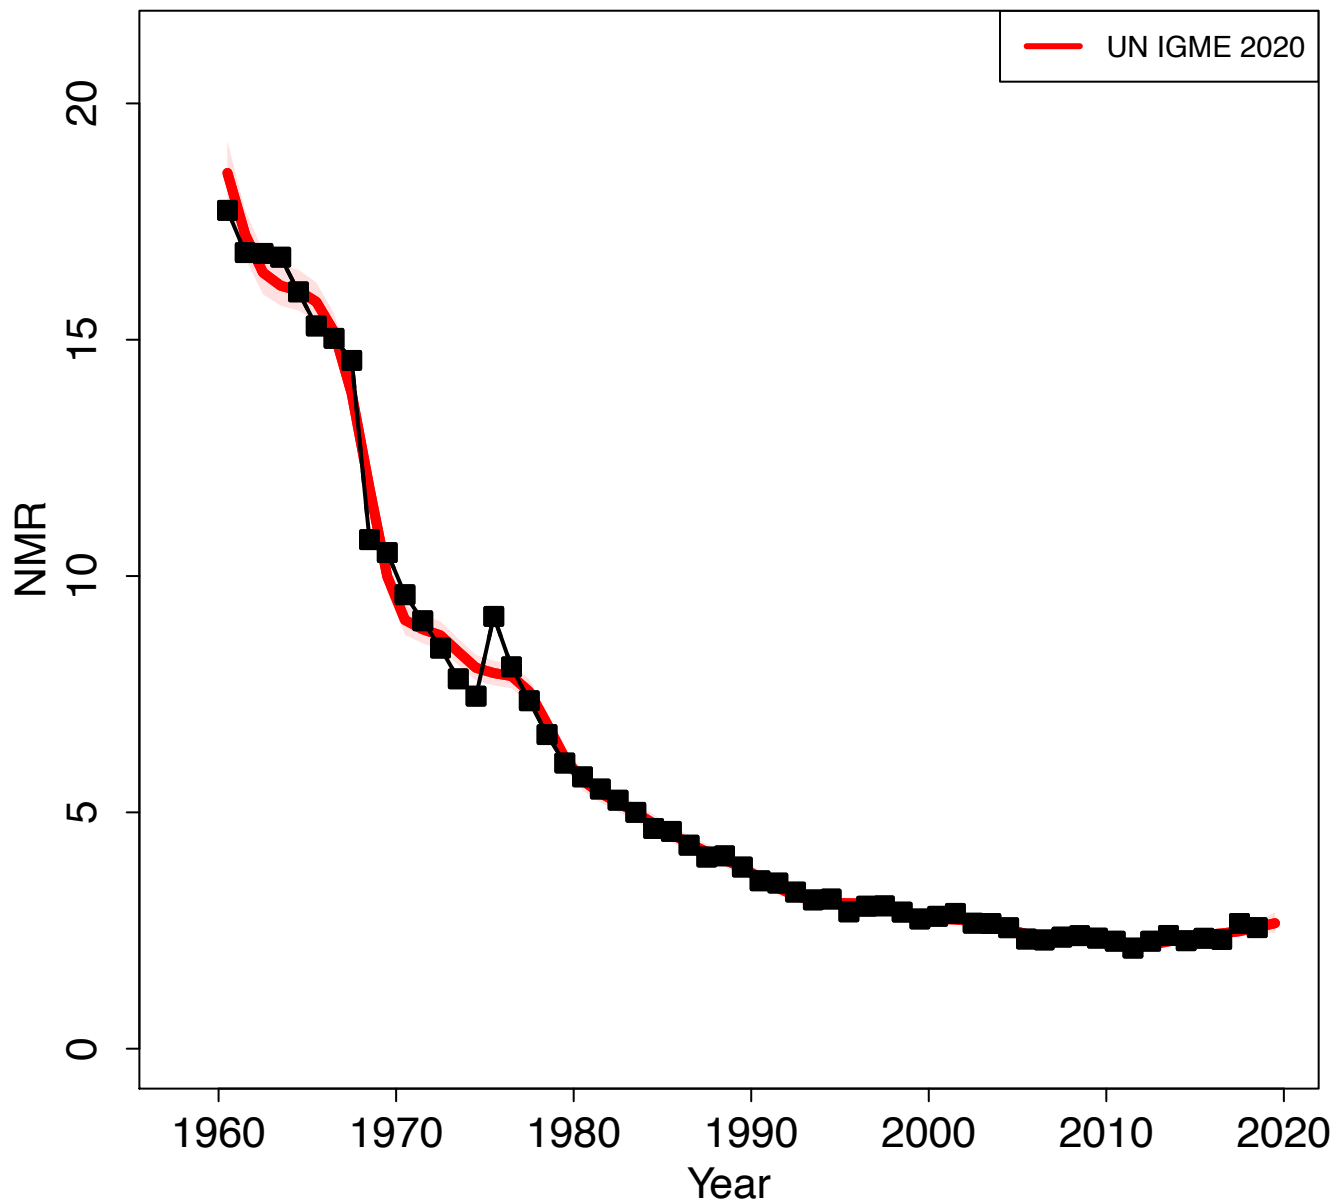

# Zoomed in

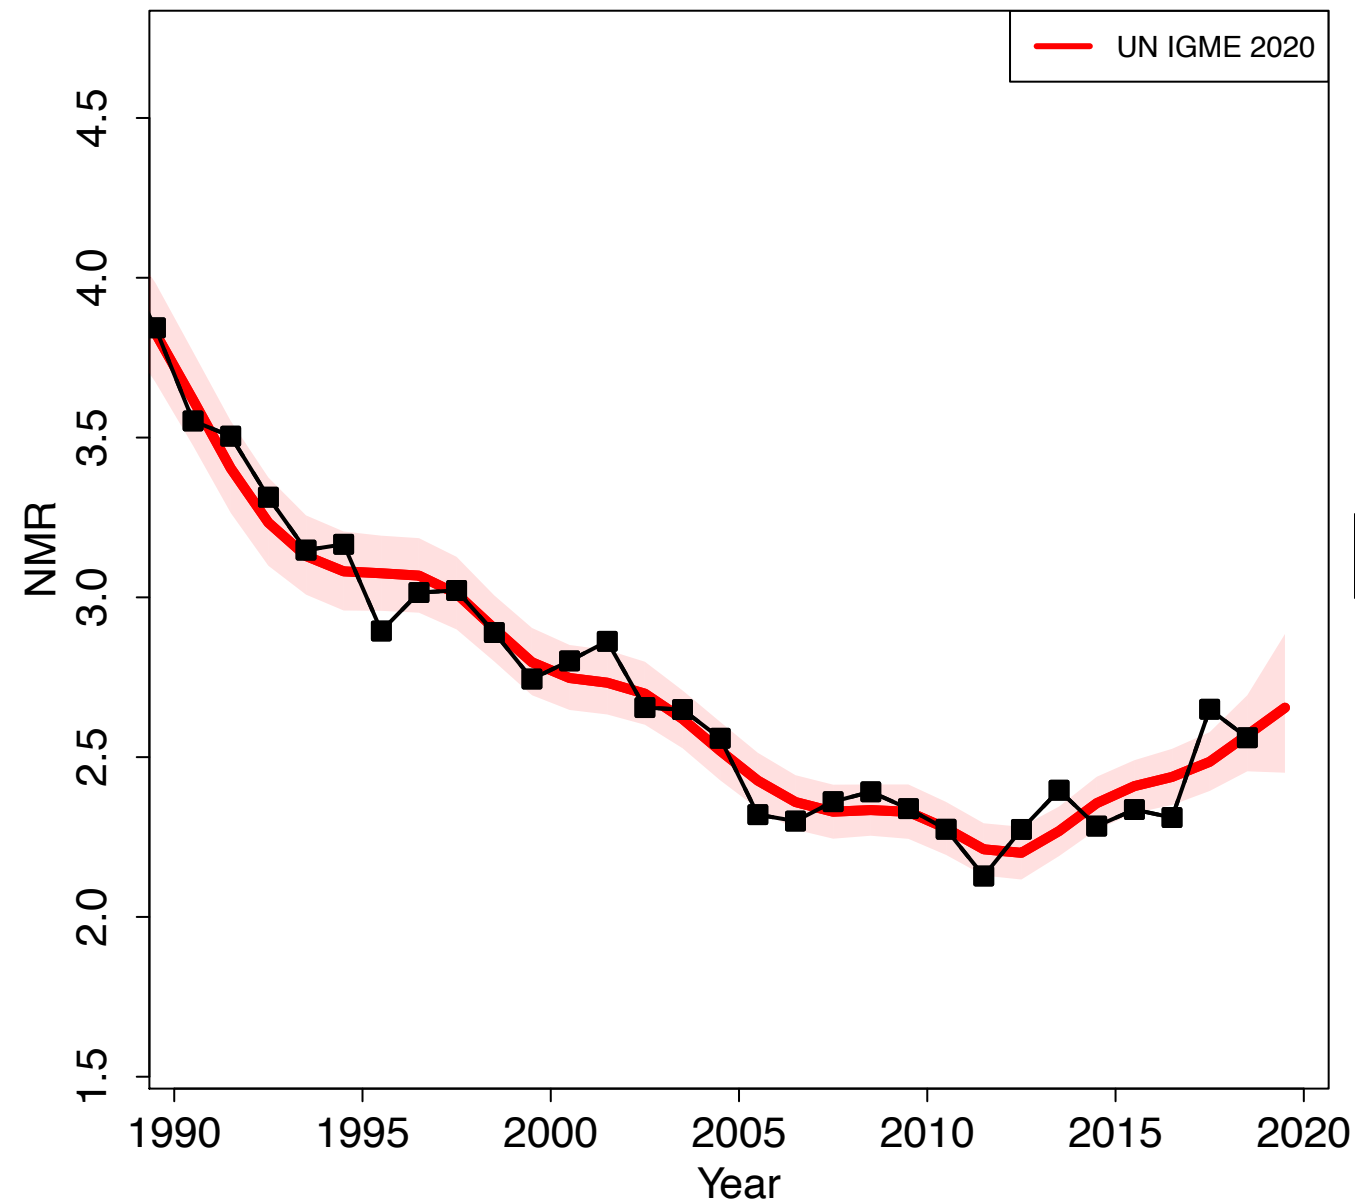

# Gabon

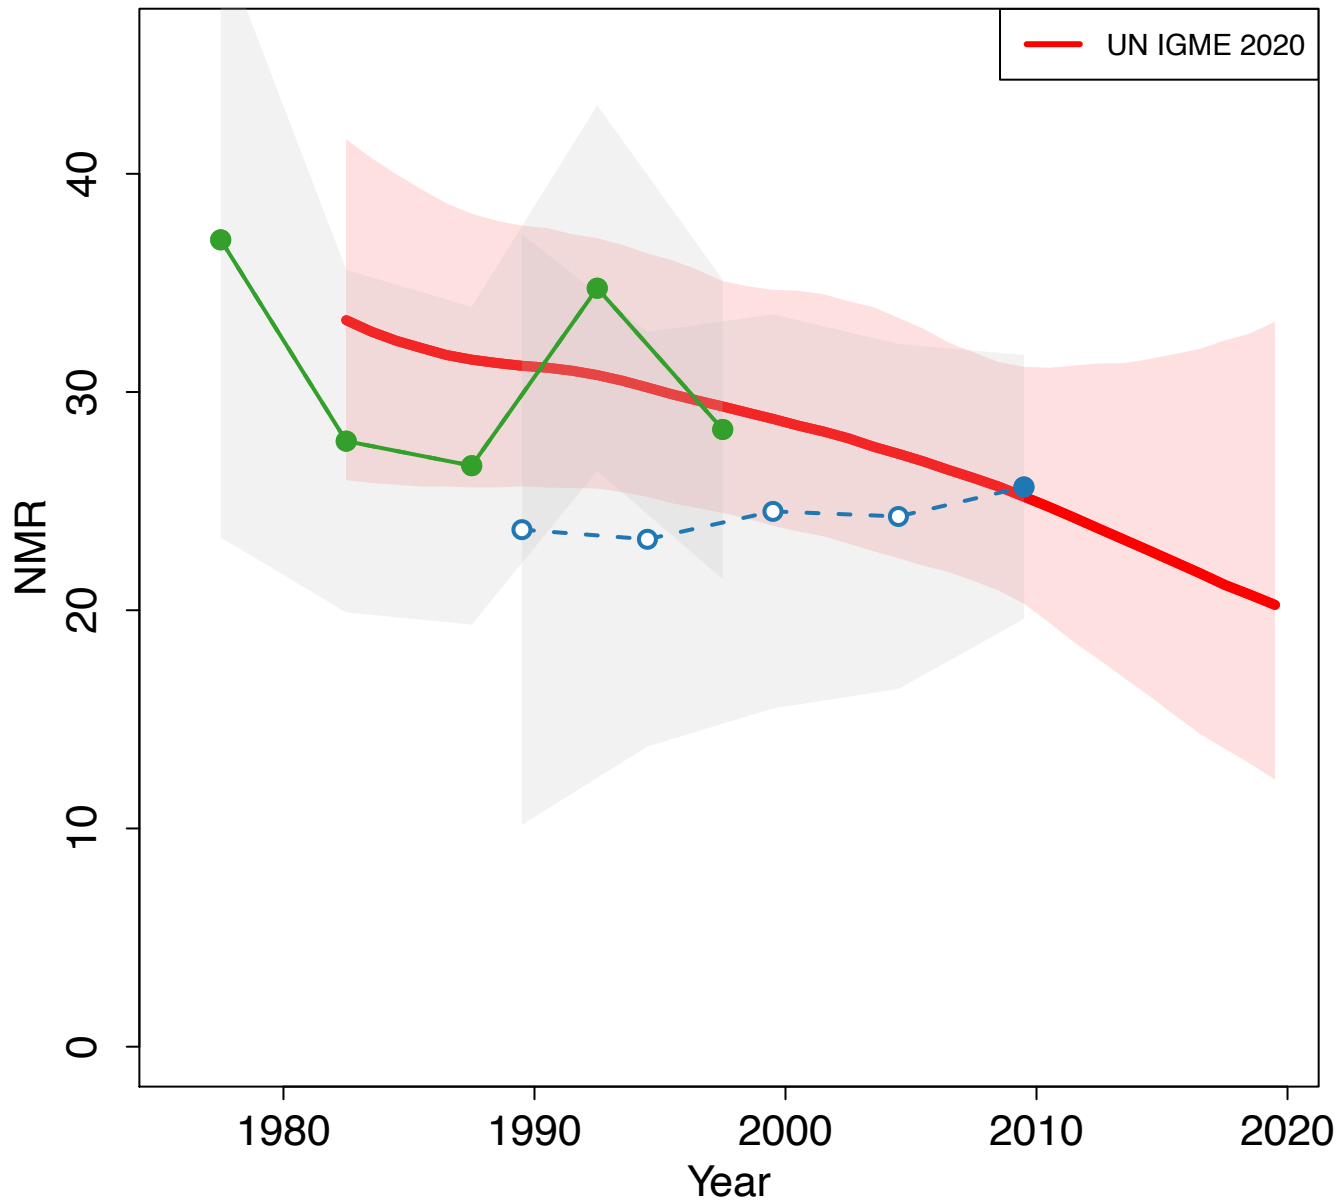

# Zoomed in

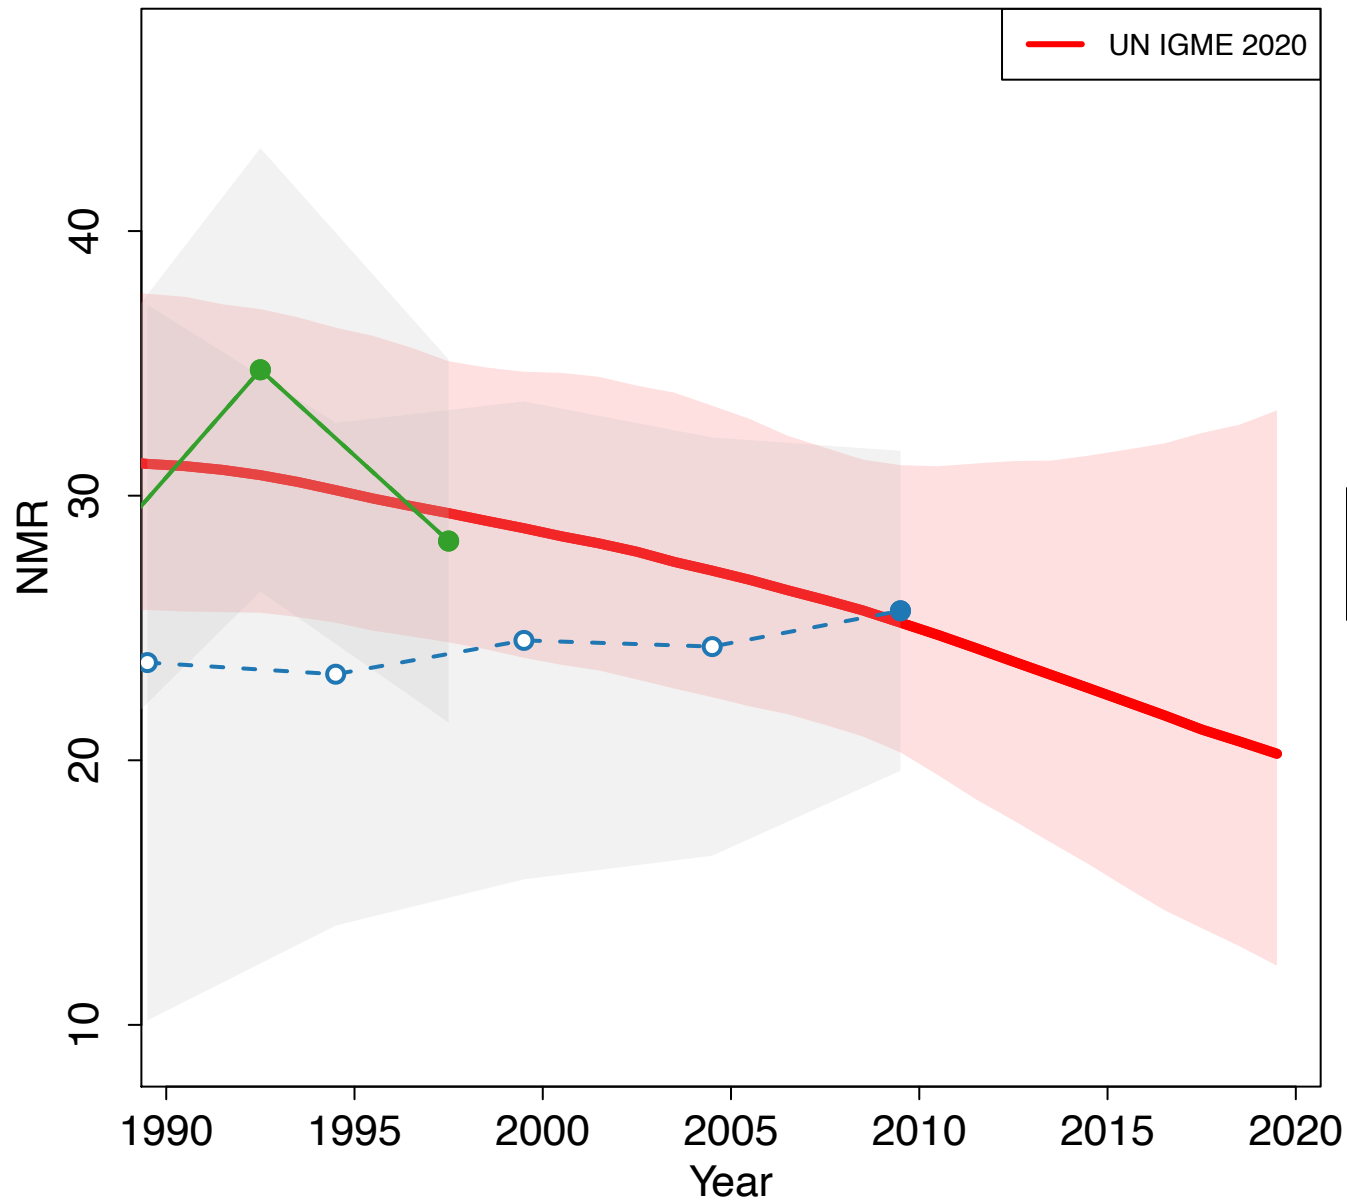

# Gambia

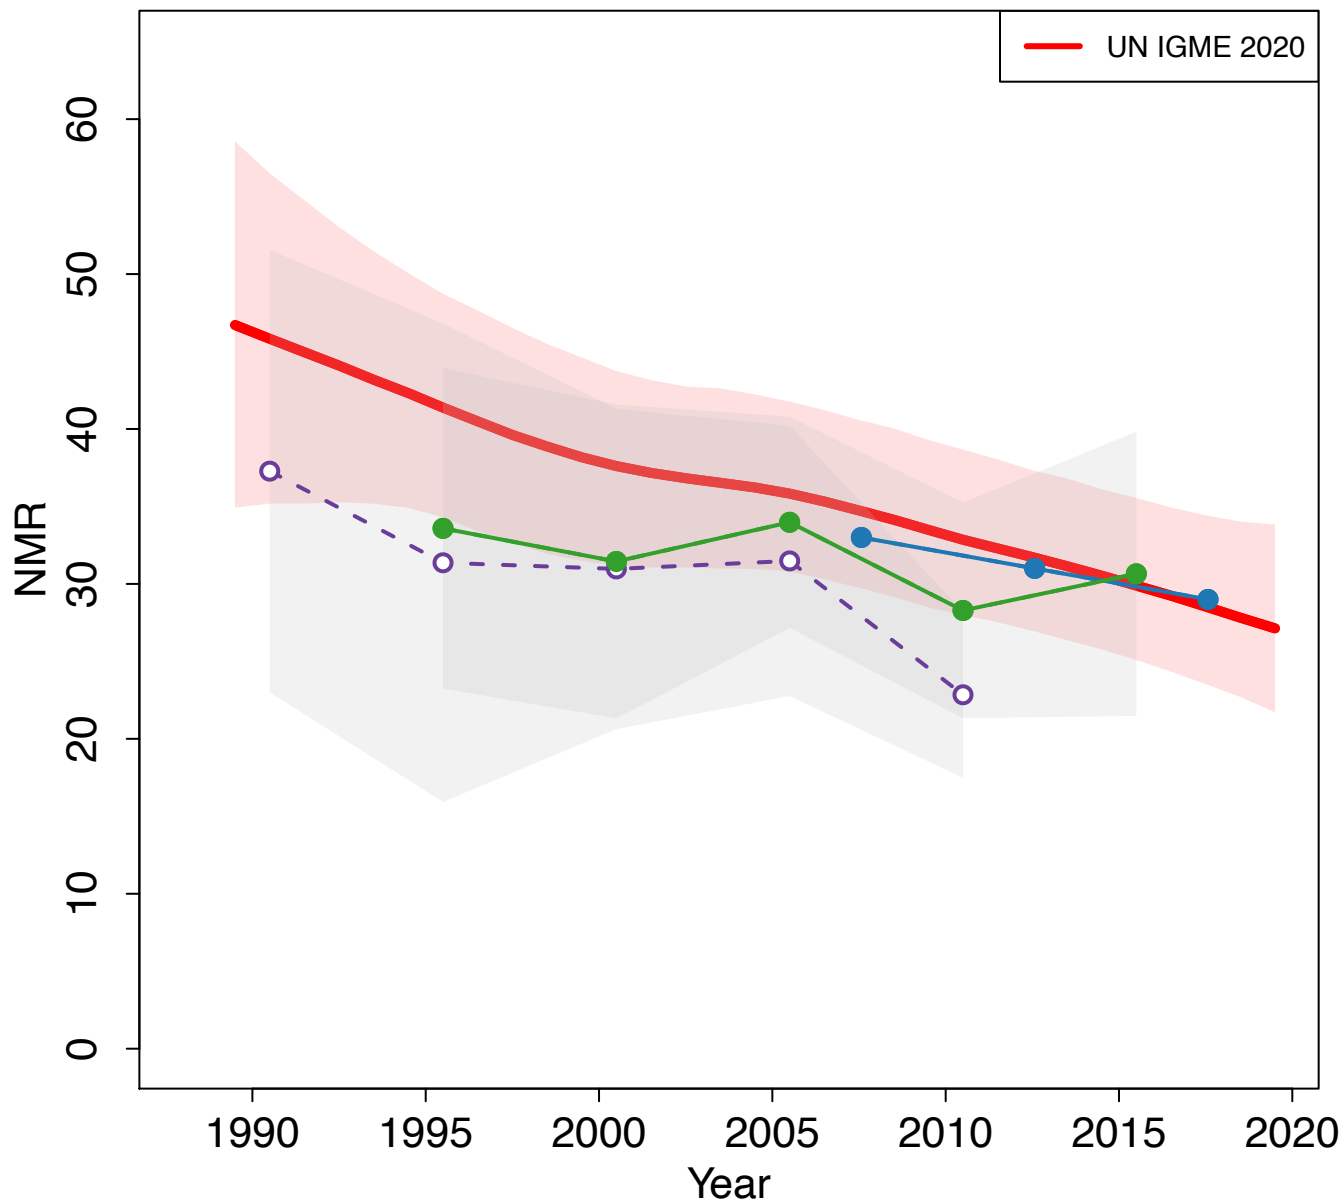

# Zoomed in

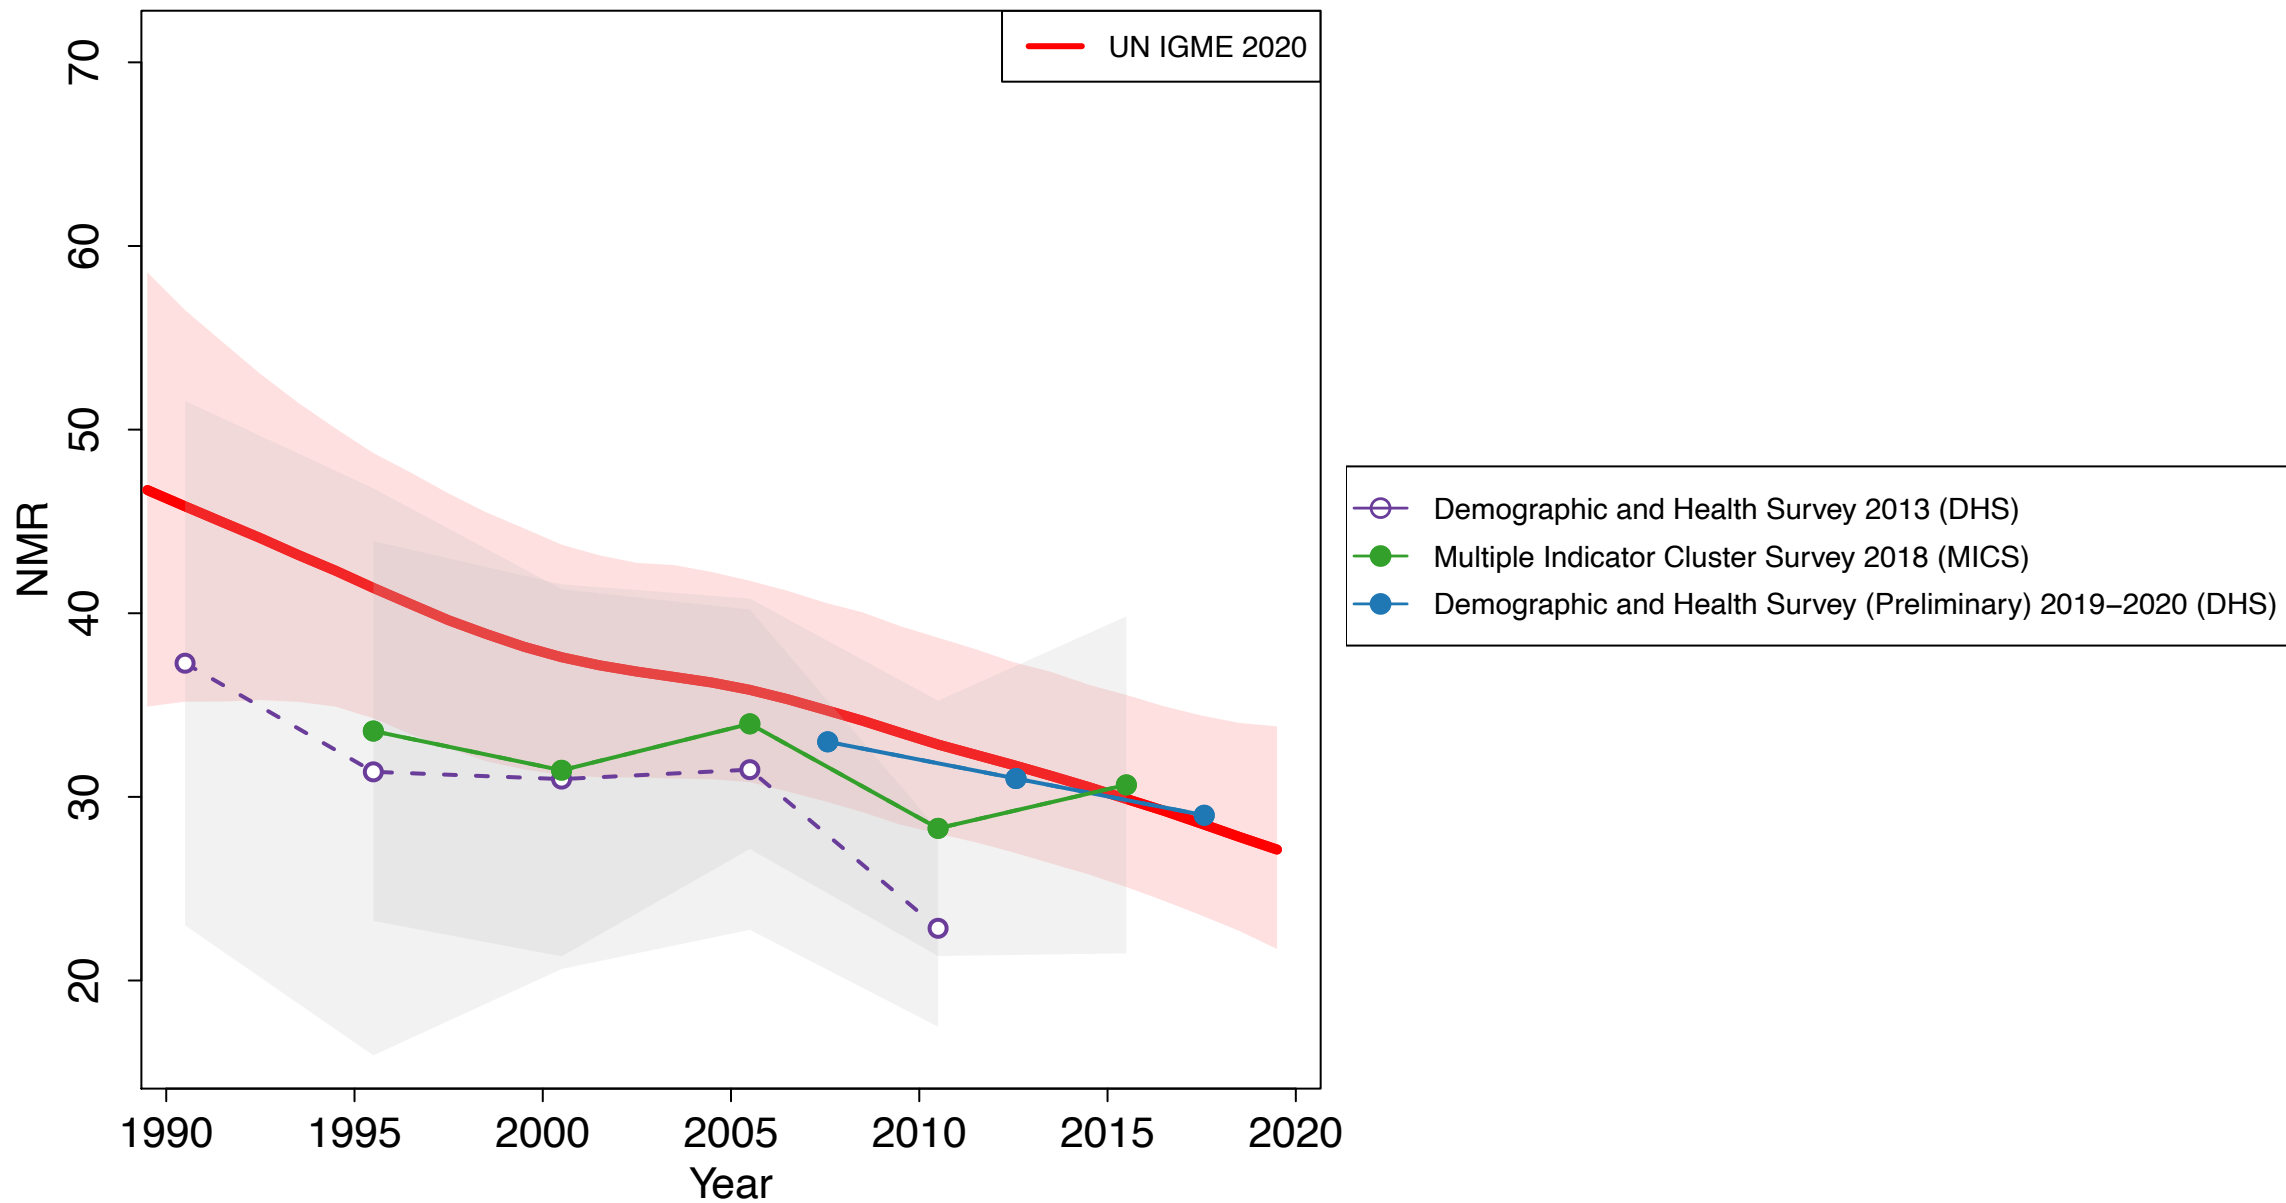

# Georgia

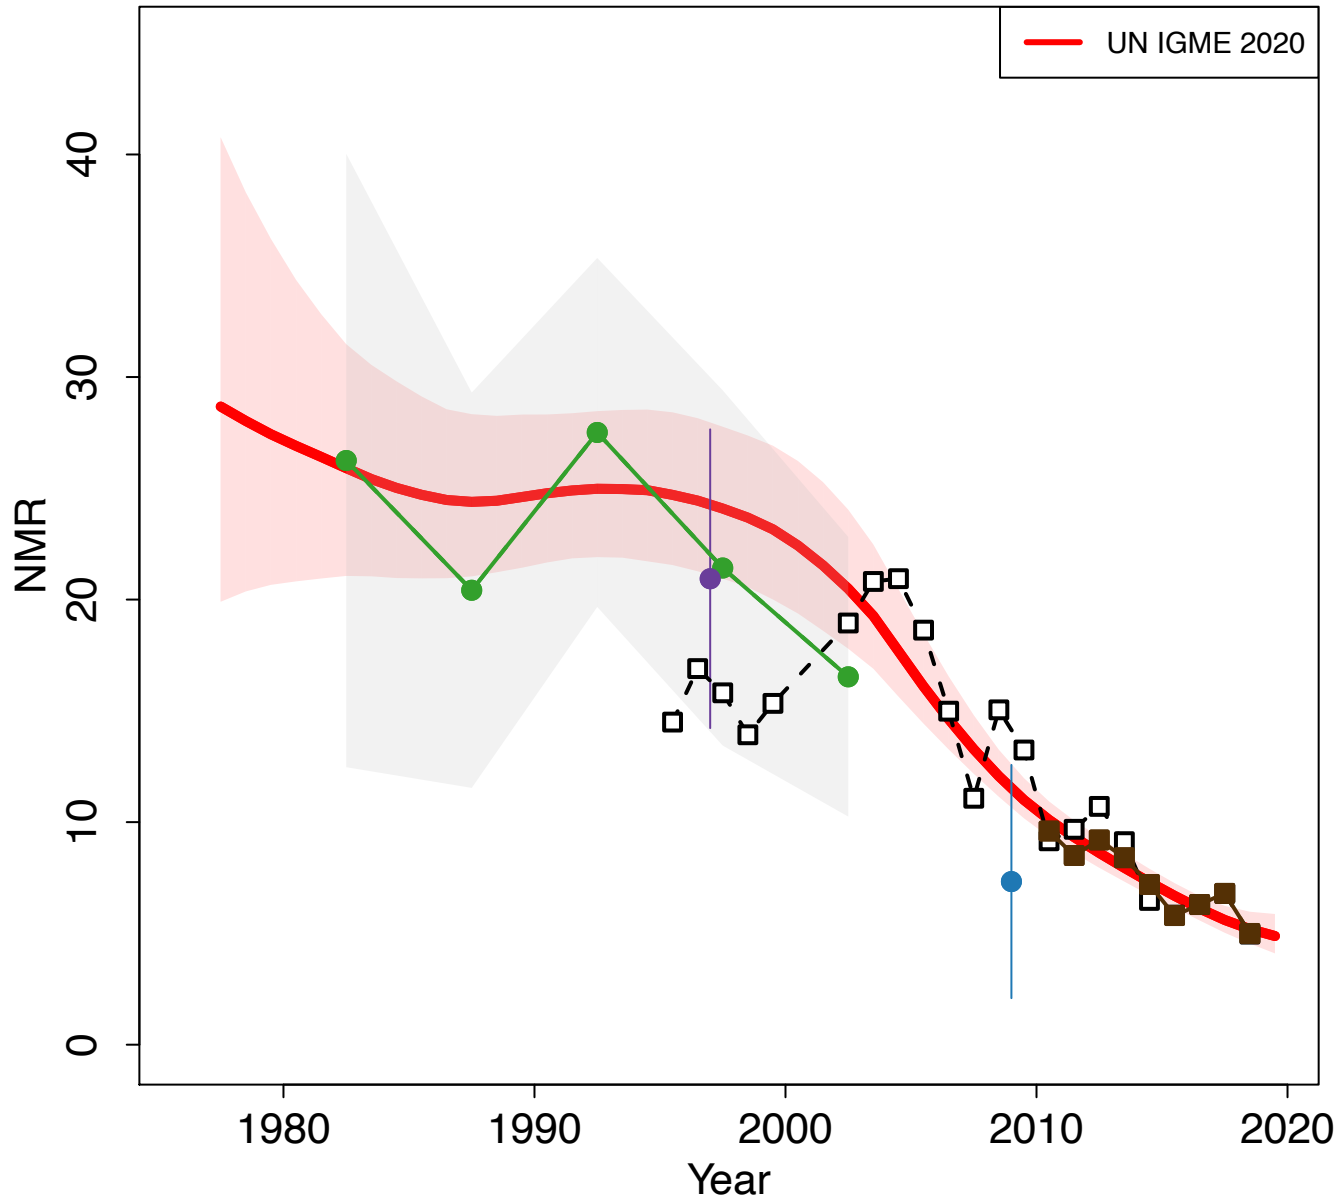

# Zoomed in

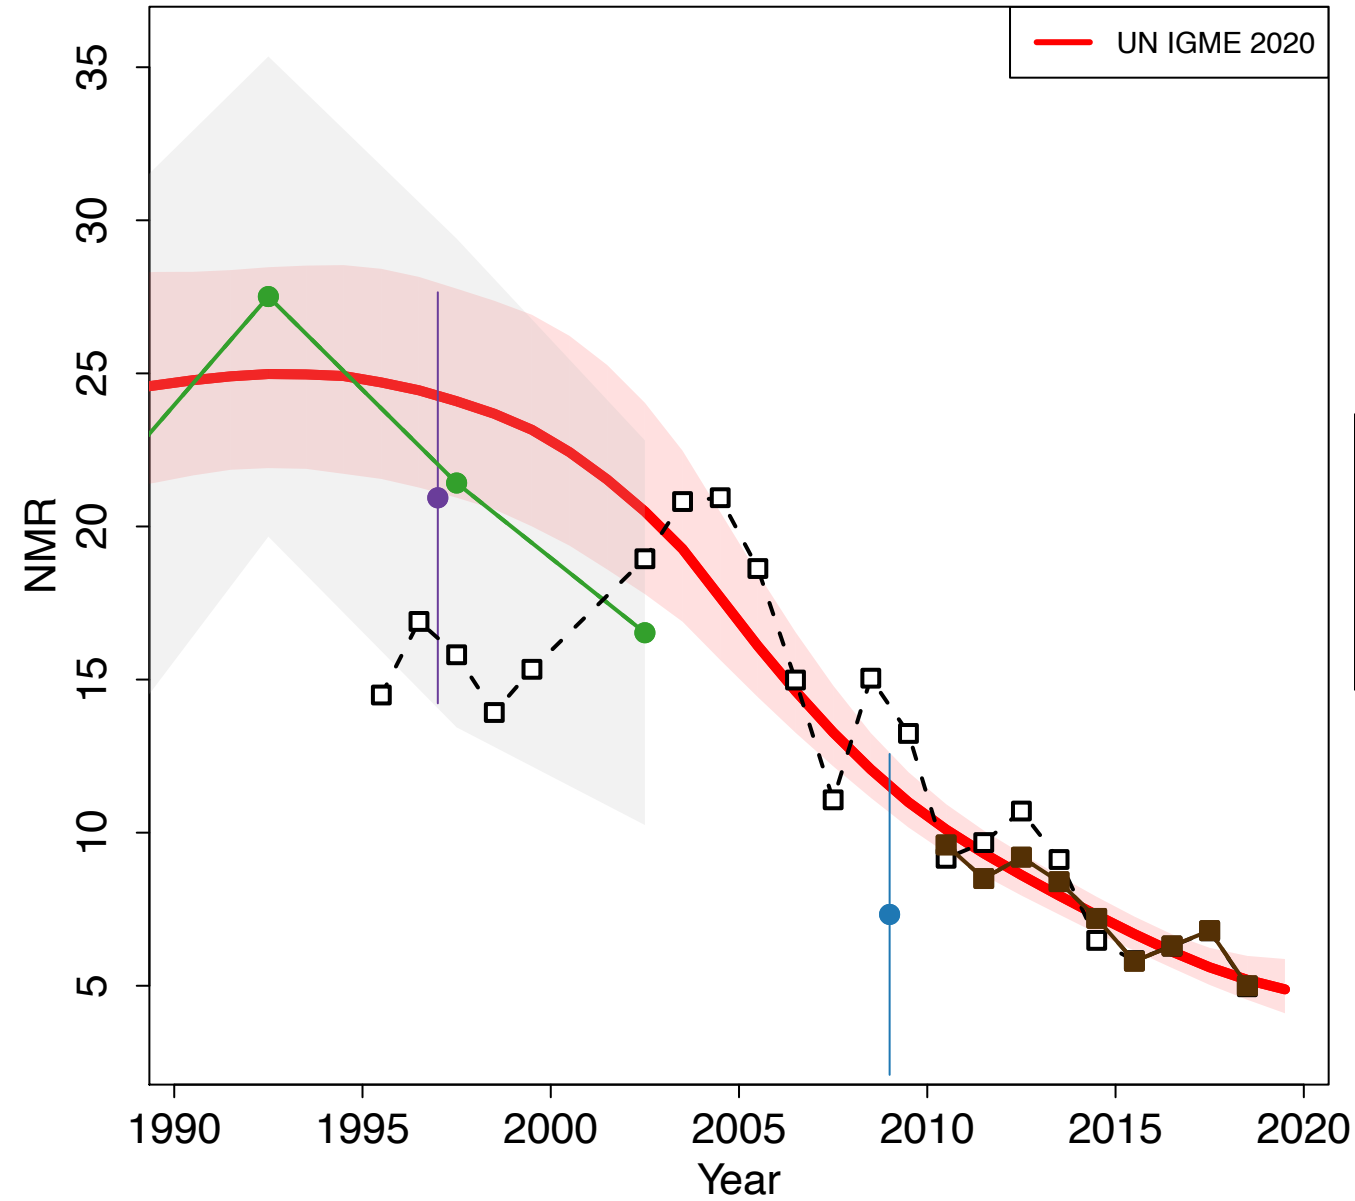

- Reproductive Health Survey 2000 (Others)
- Reproductive Health Survey 2005 (Others)
- Reproductive Health Survey 2010 (Others)
- VR Vital Statistics of the National Center for Disease Control and Public Health
- VR WHO

# Germany

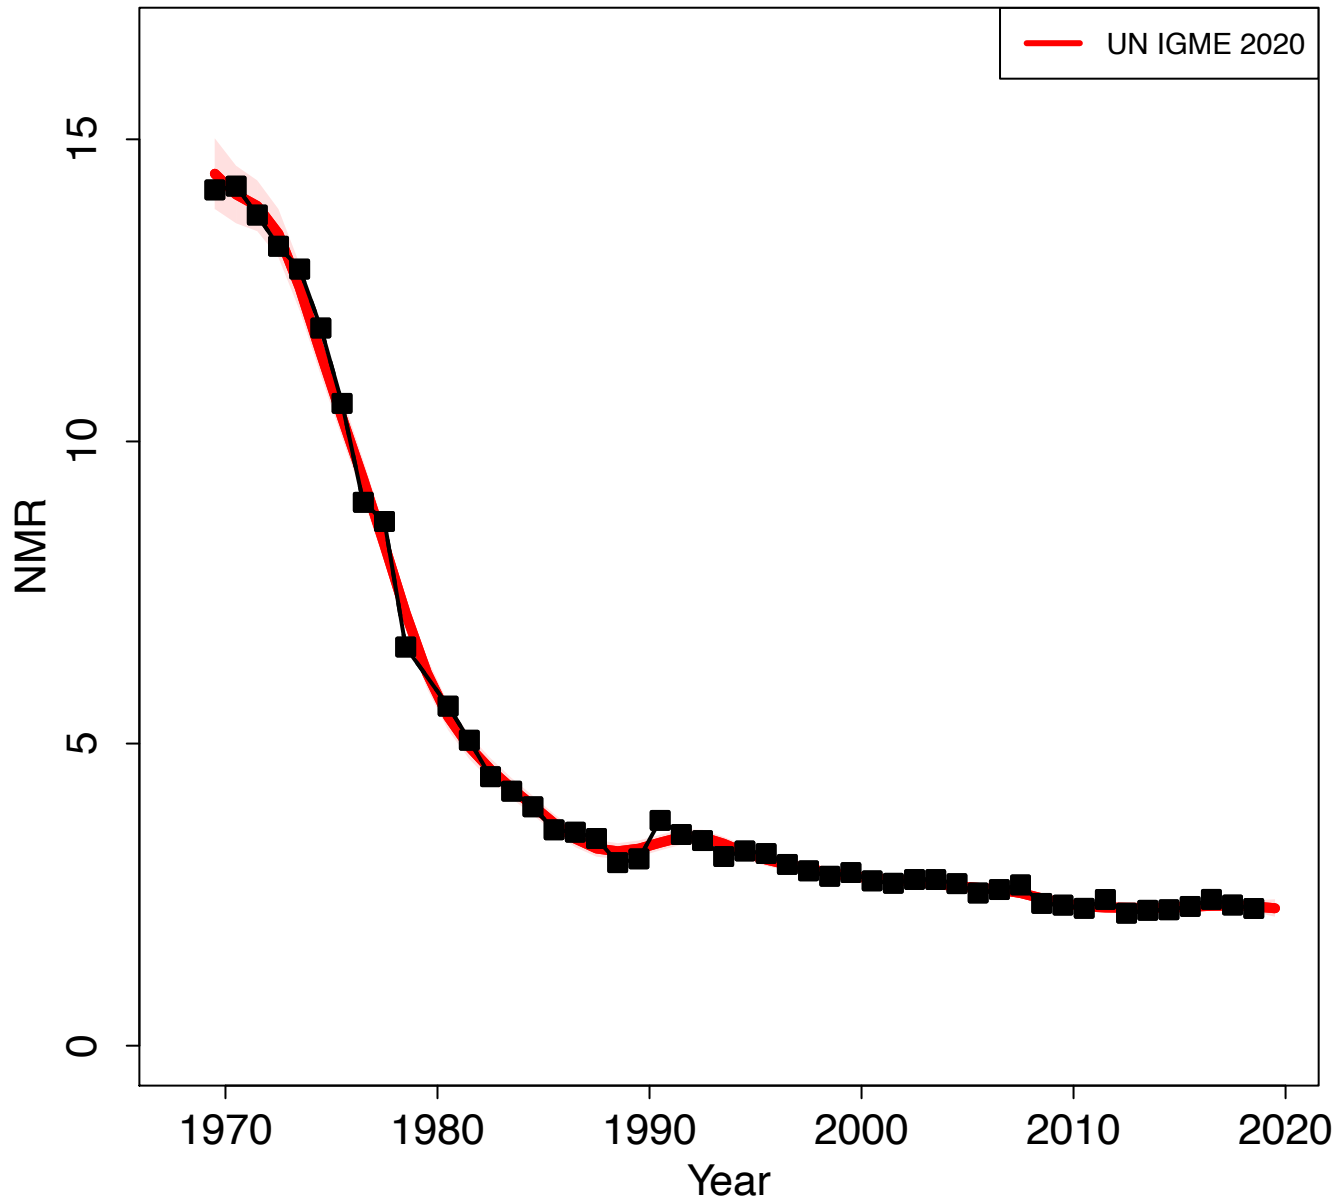

# Zoomed in

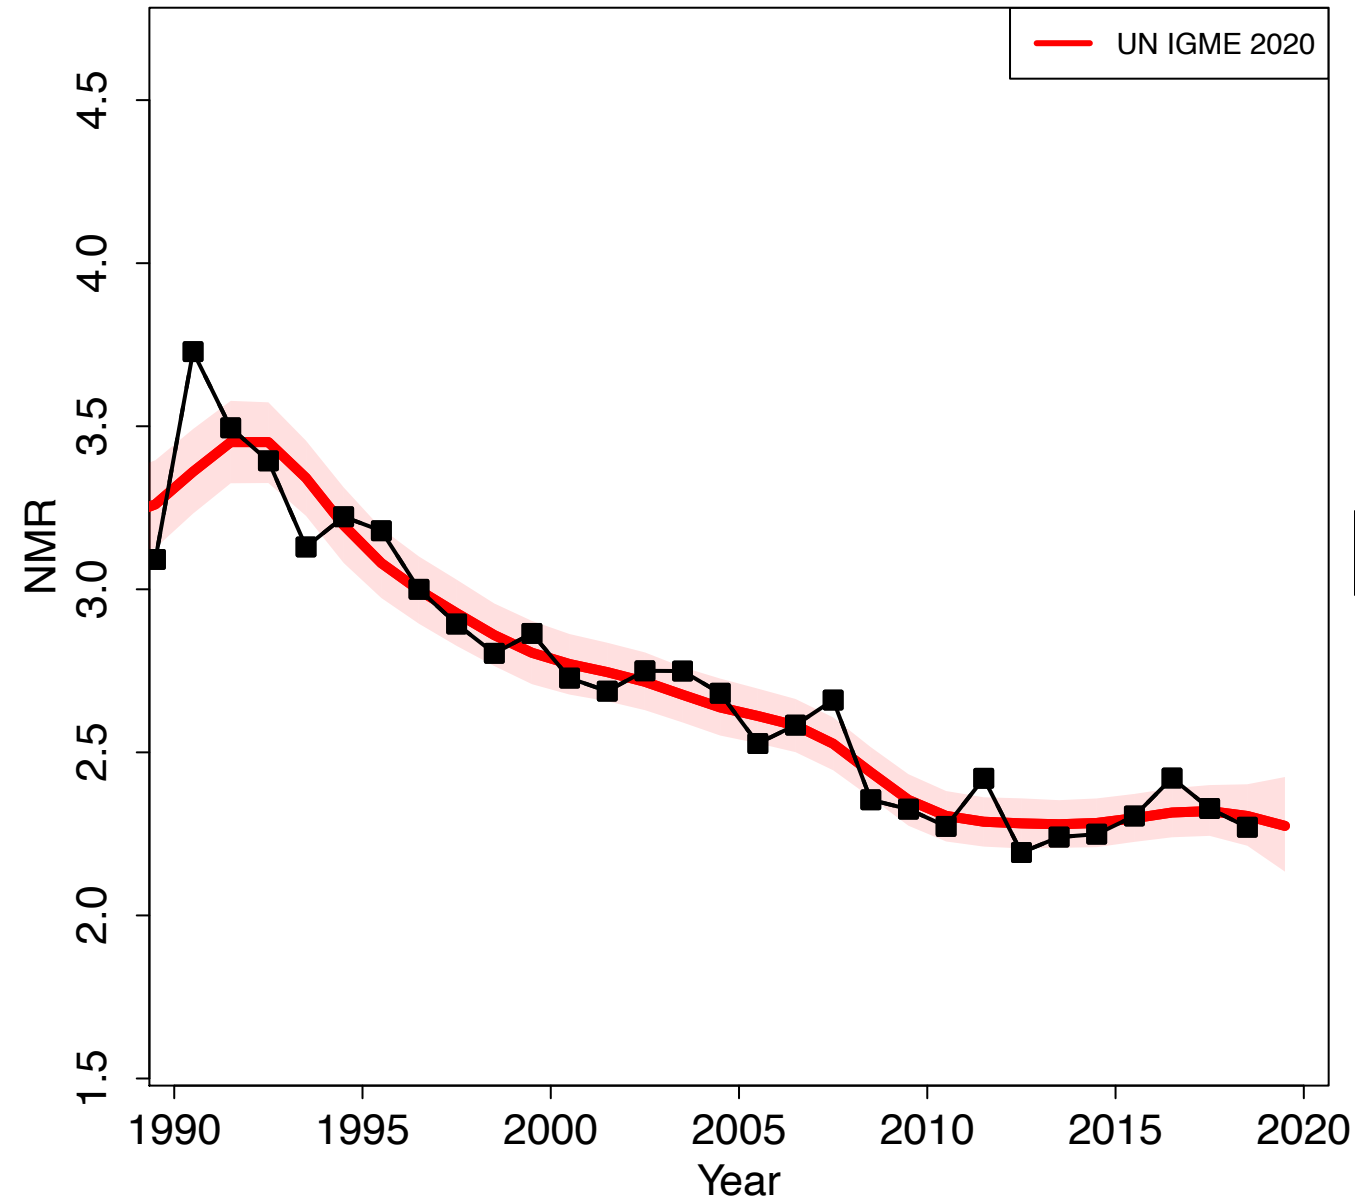

# Ghana

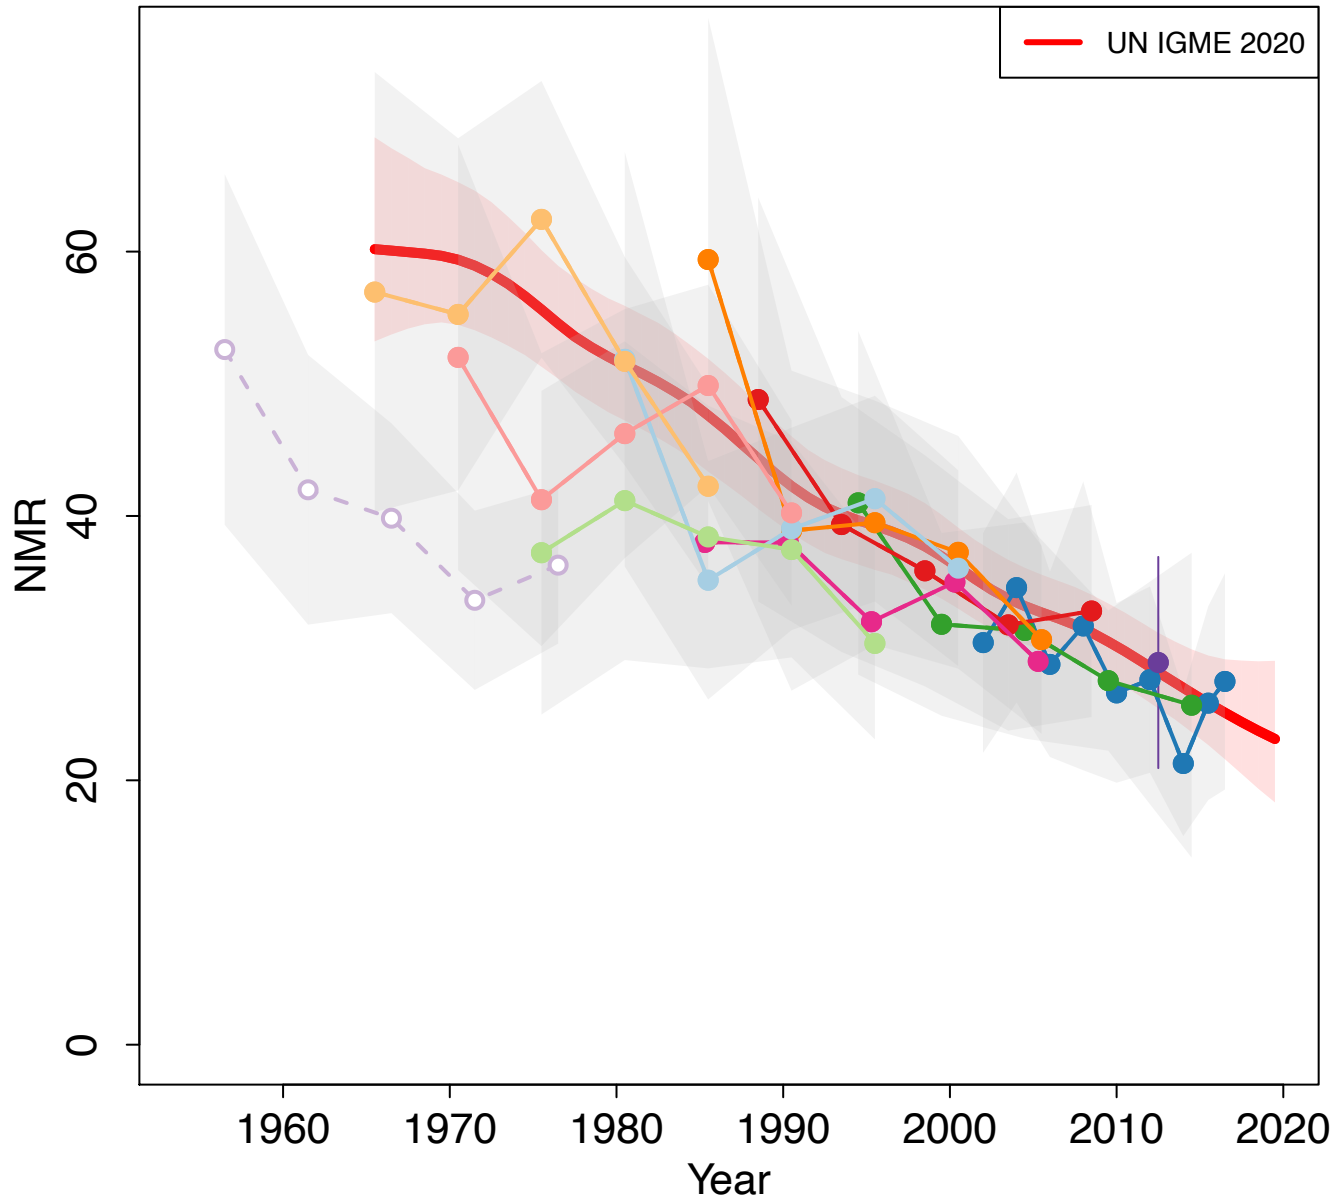

# Zoomed in

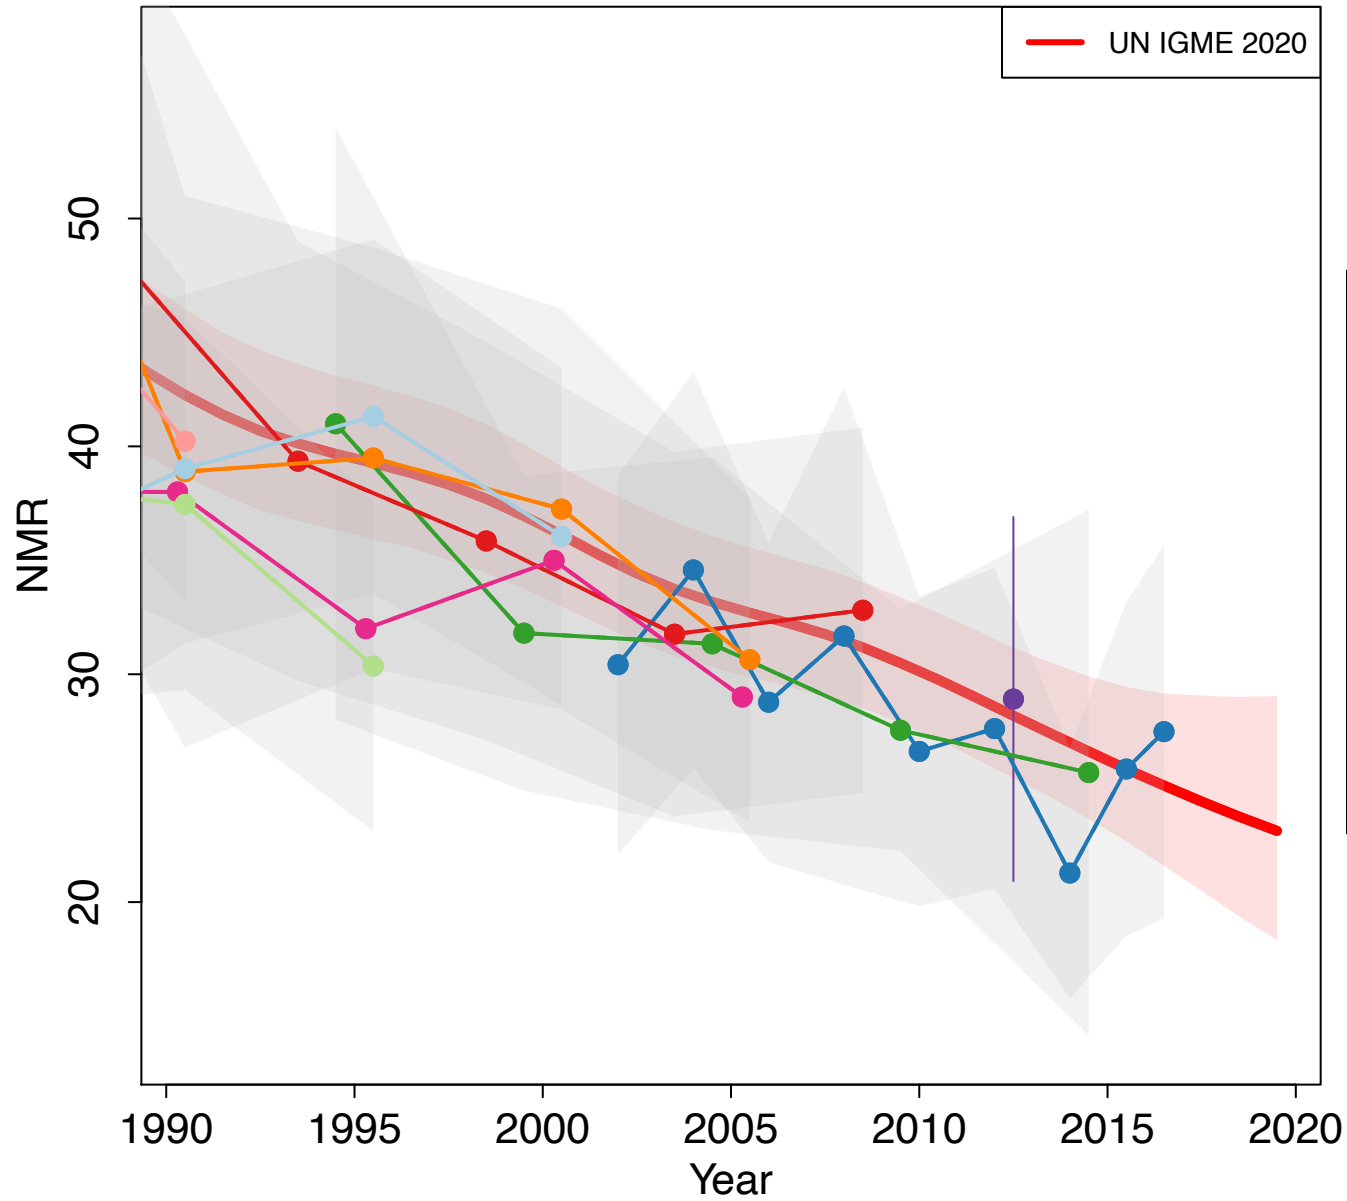



# Greece

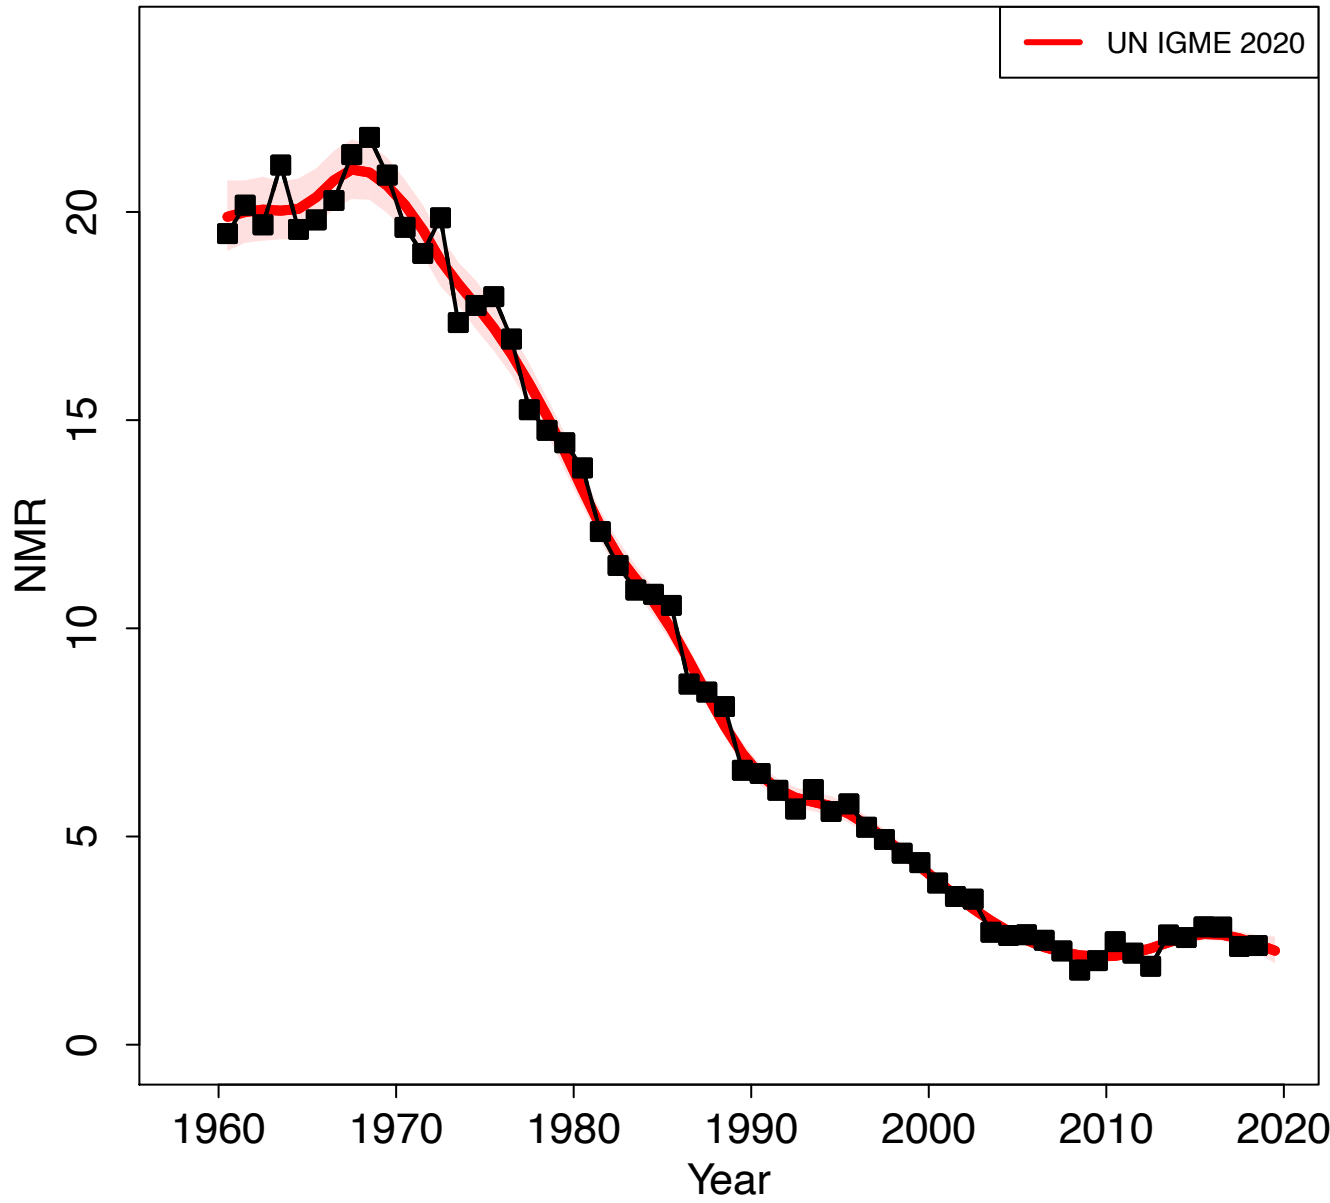

# Zoomed in

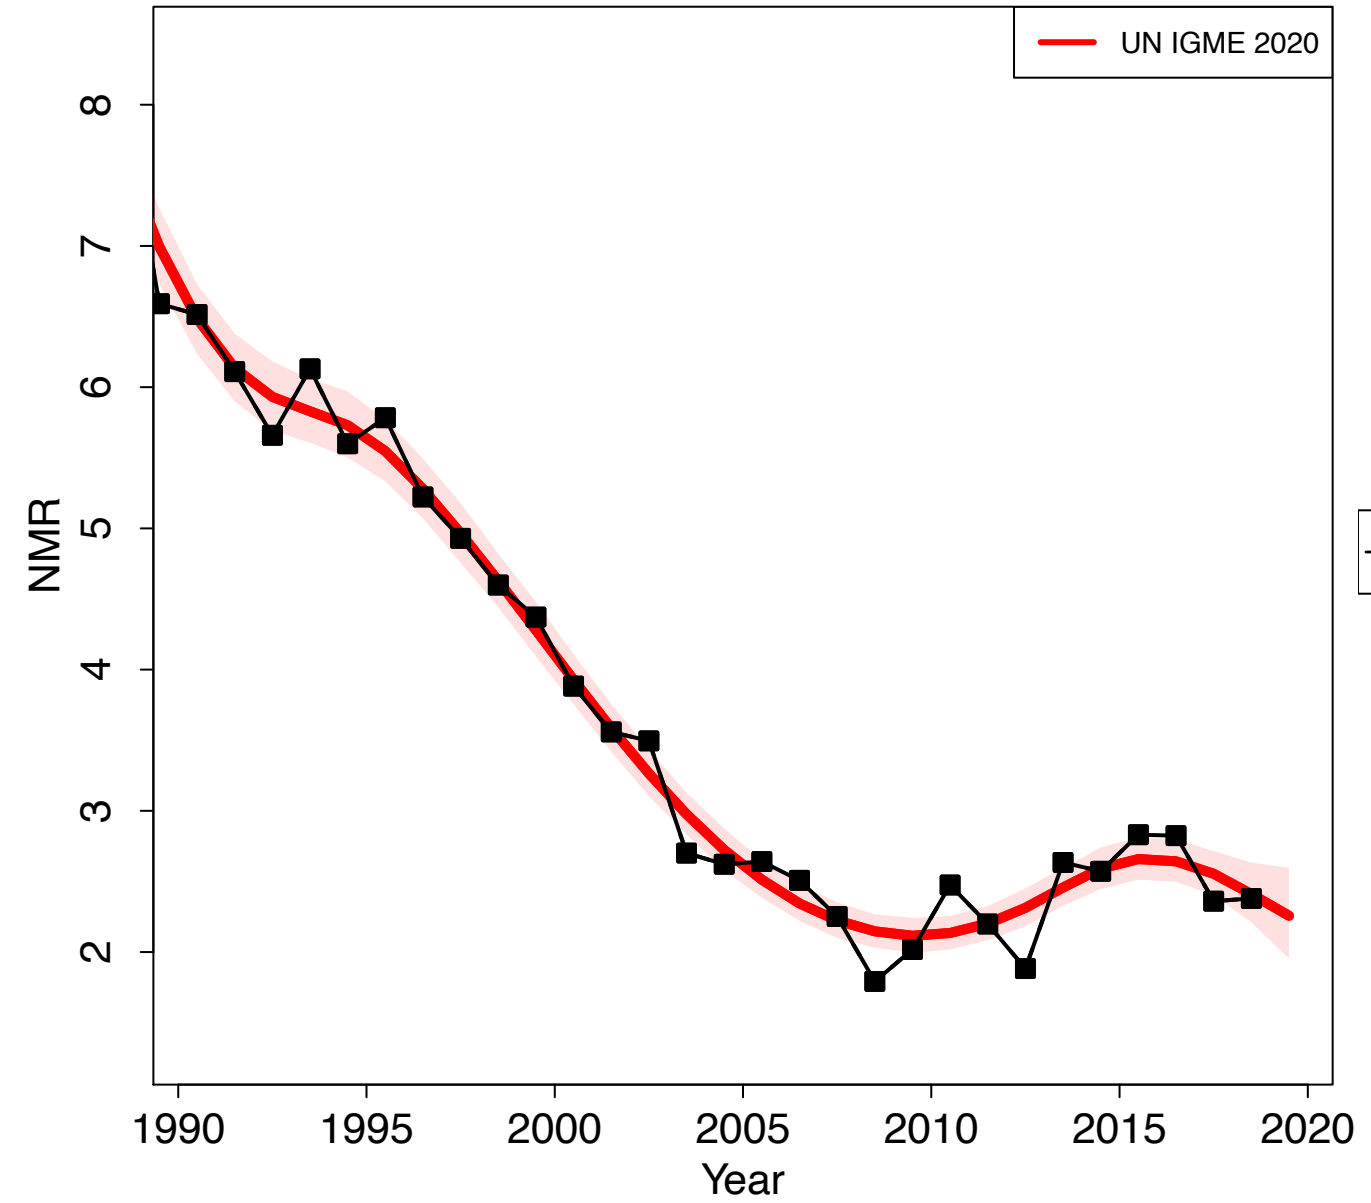

# Grenada

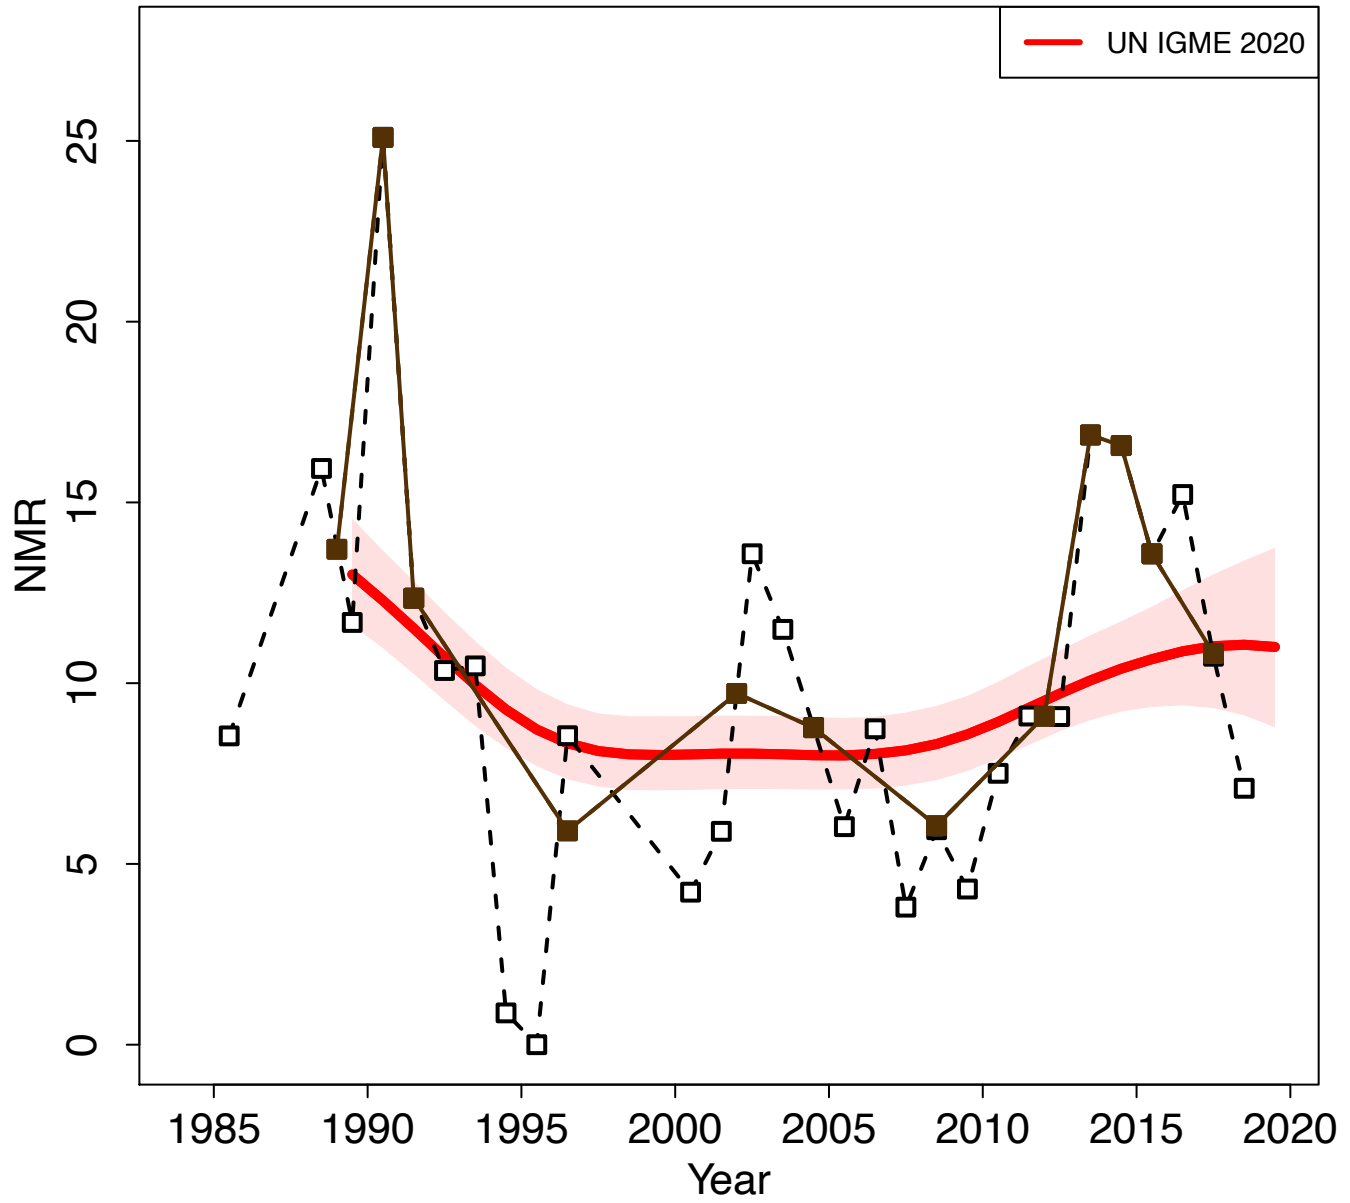

# Zoomed in

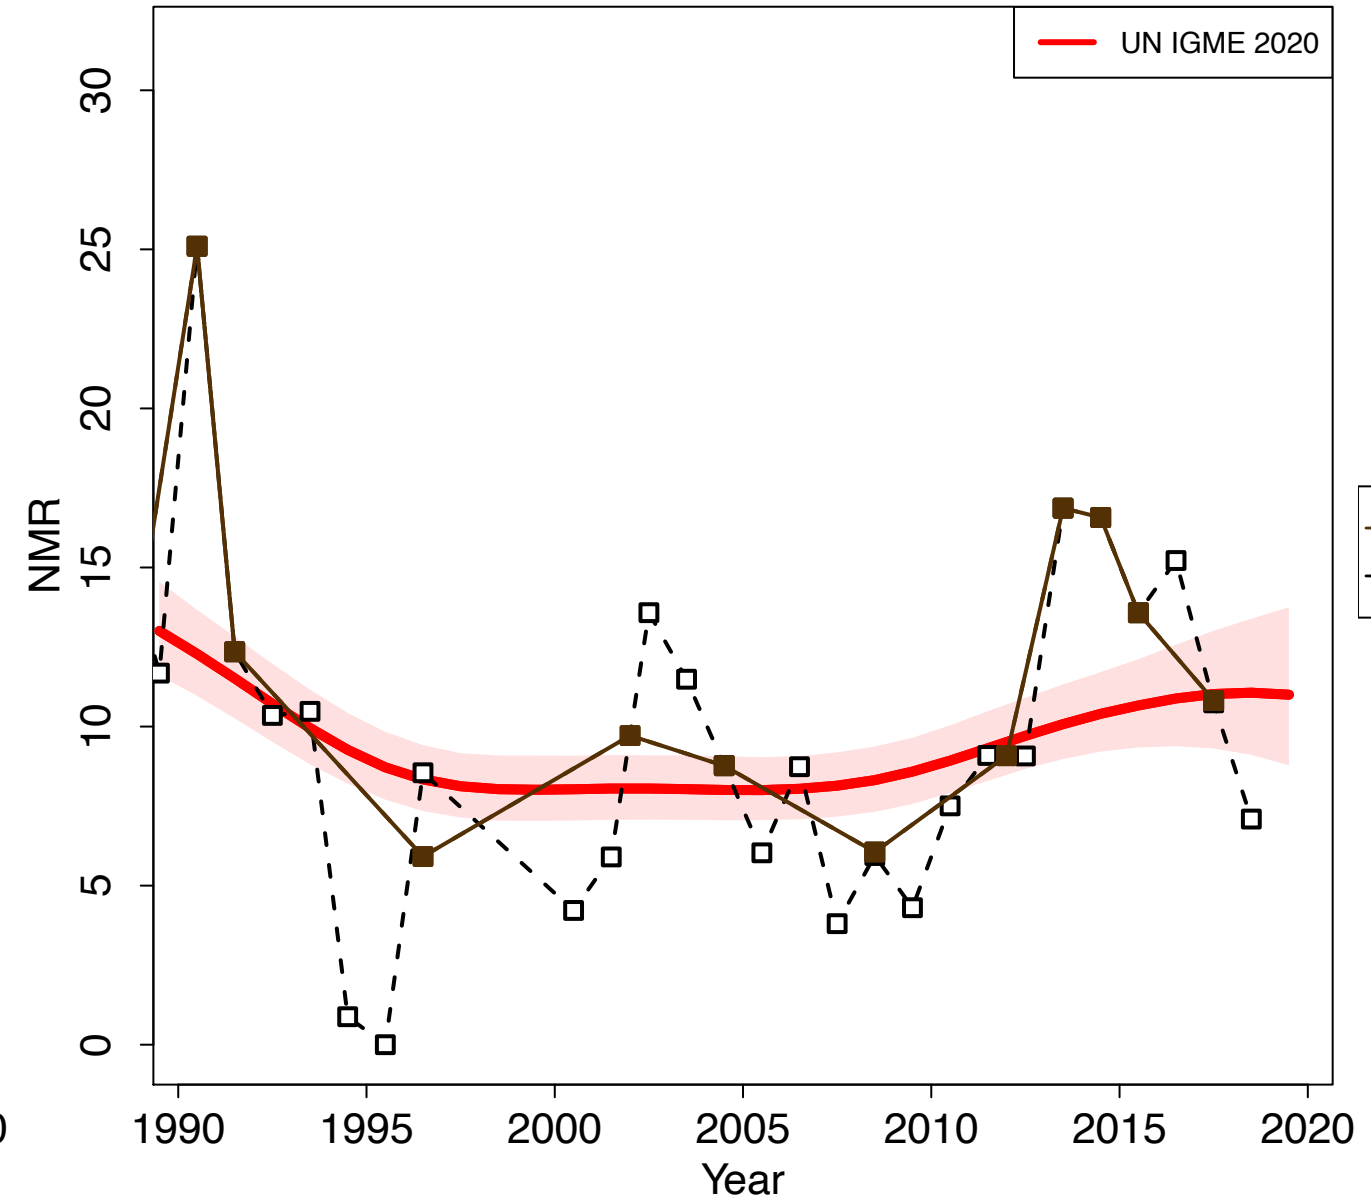

# Guatemala

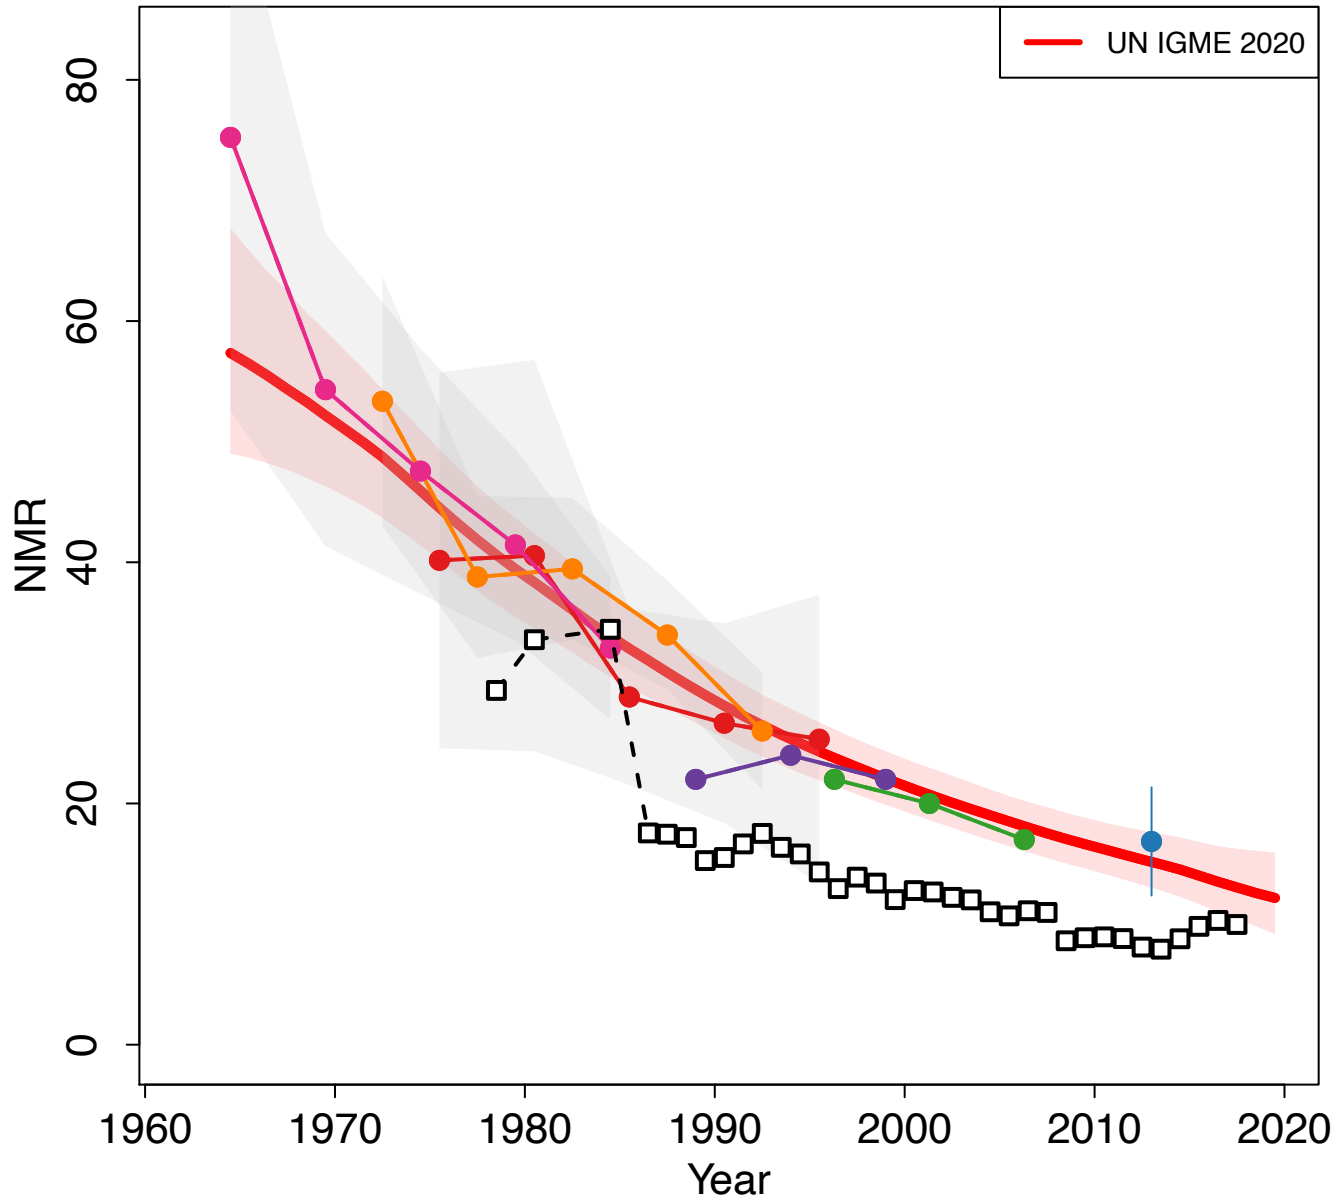

# Zoomed in

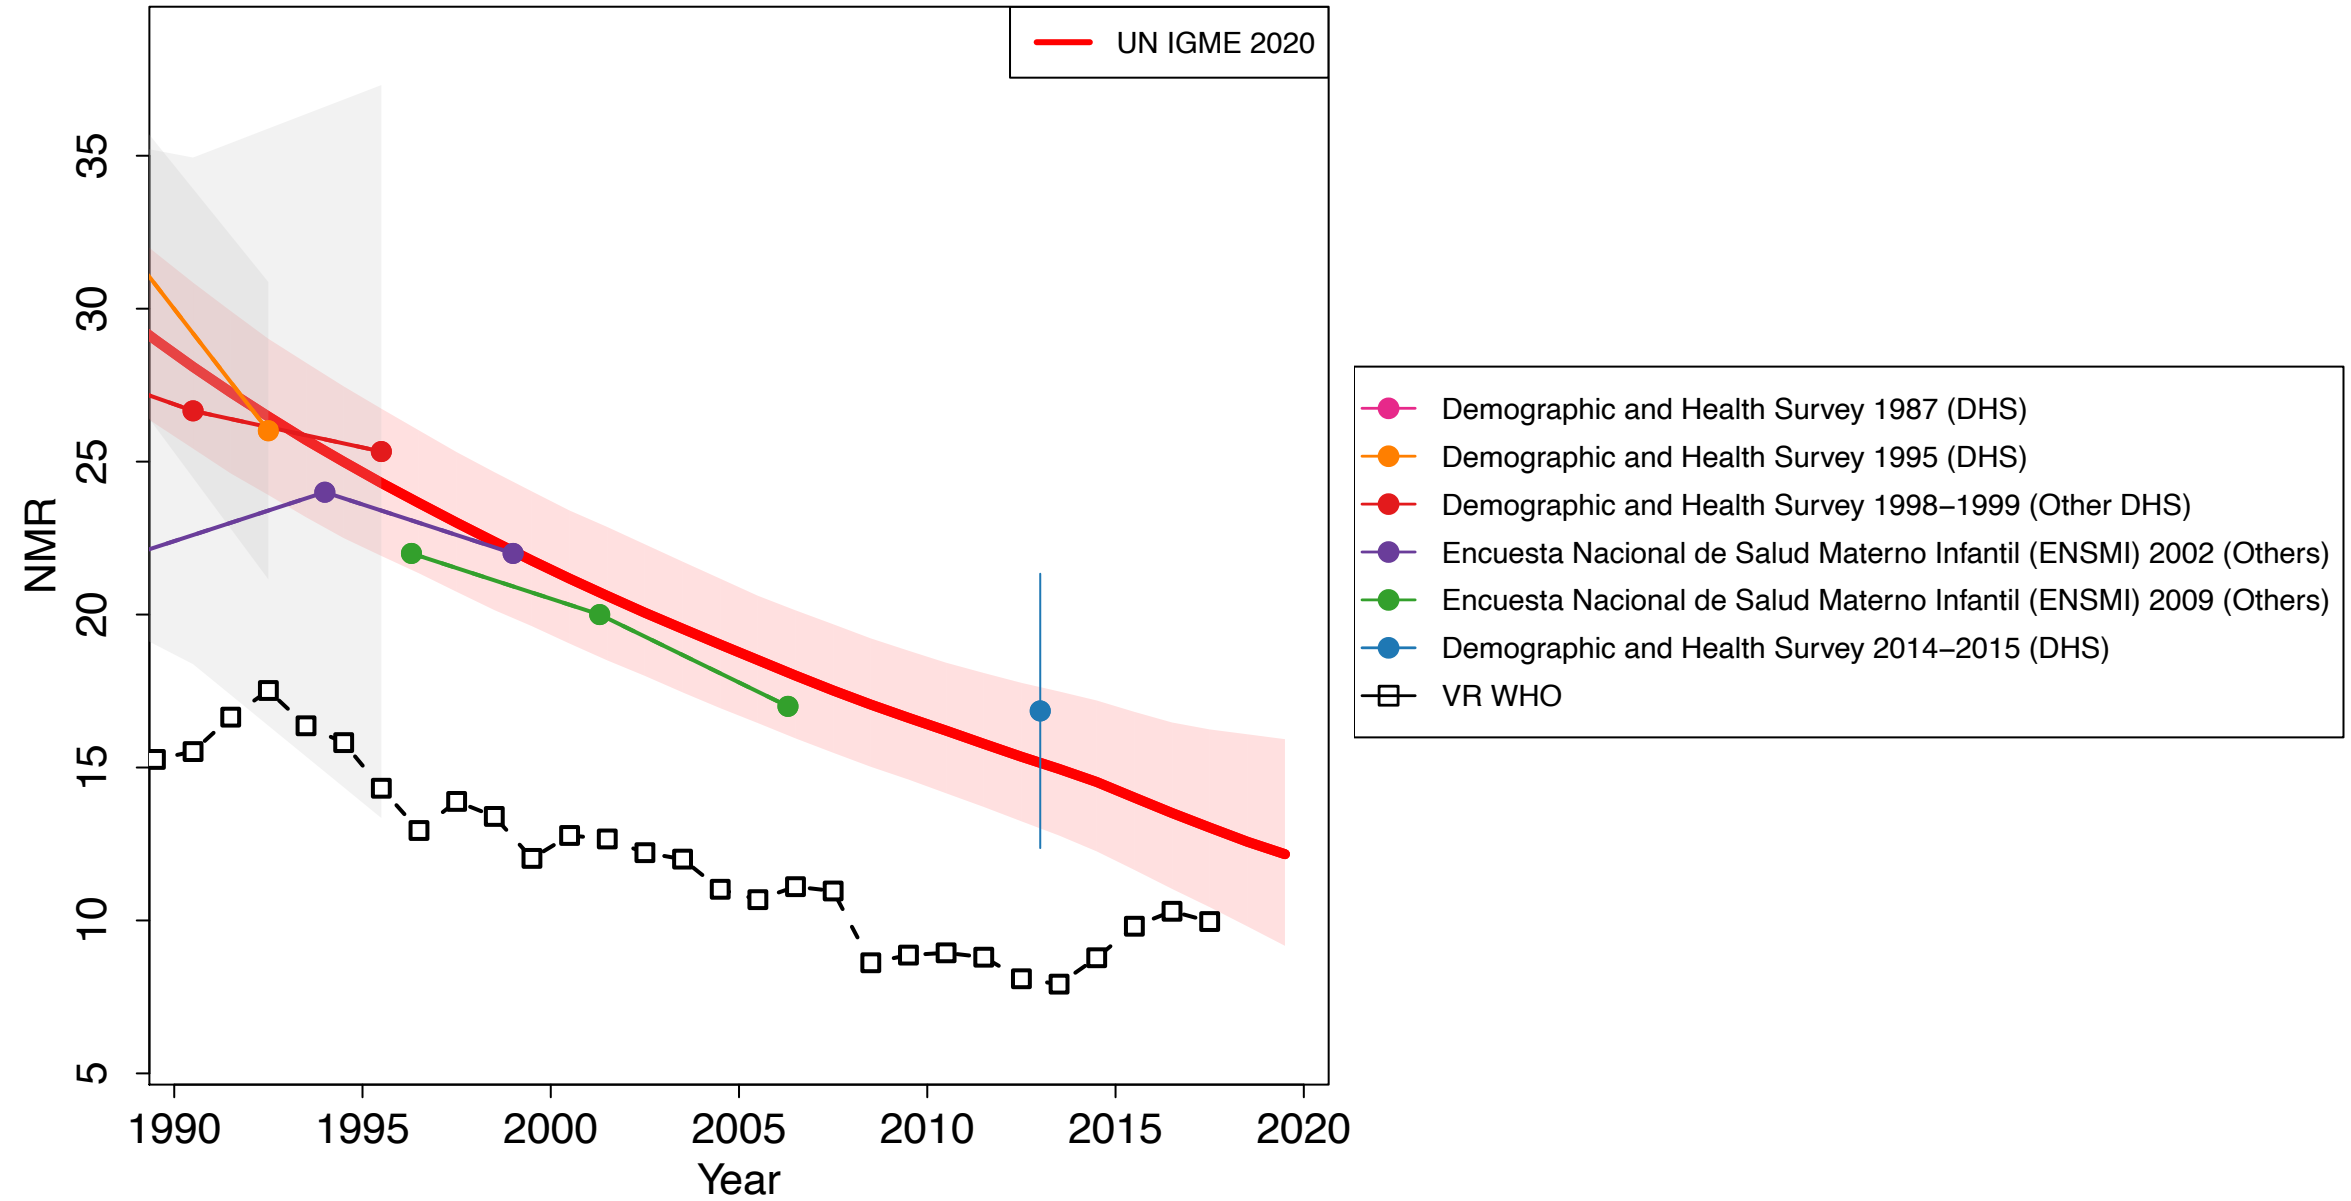

# Guinea

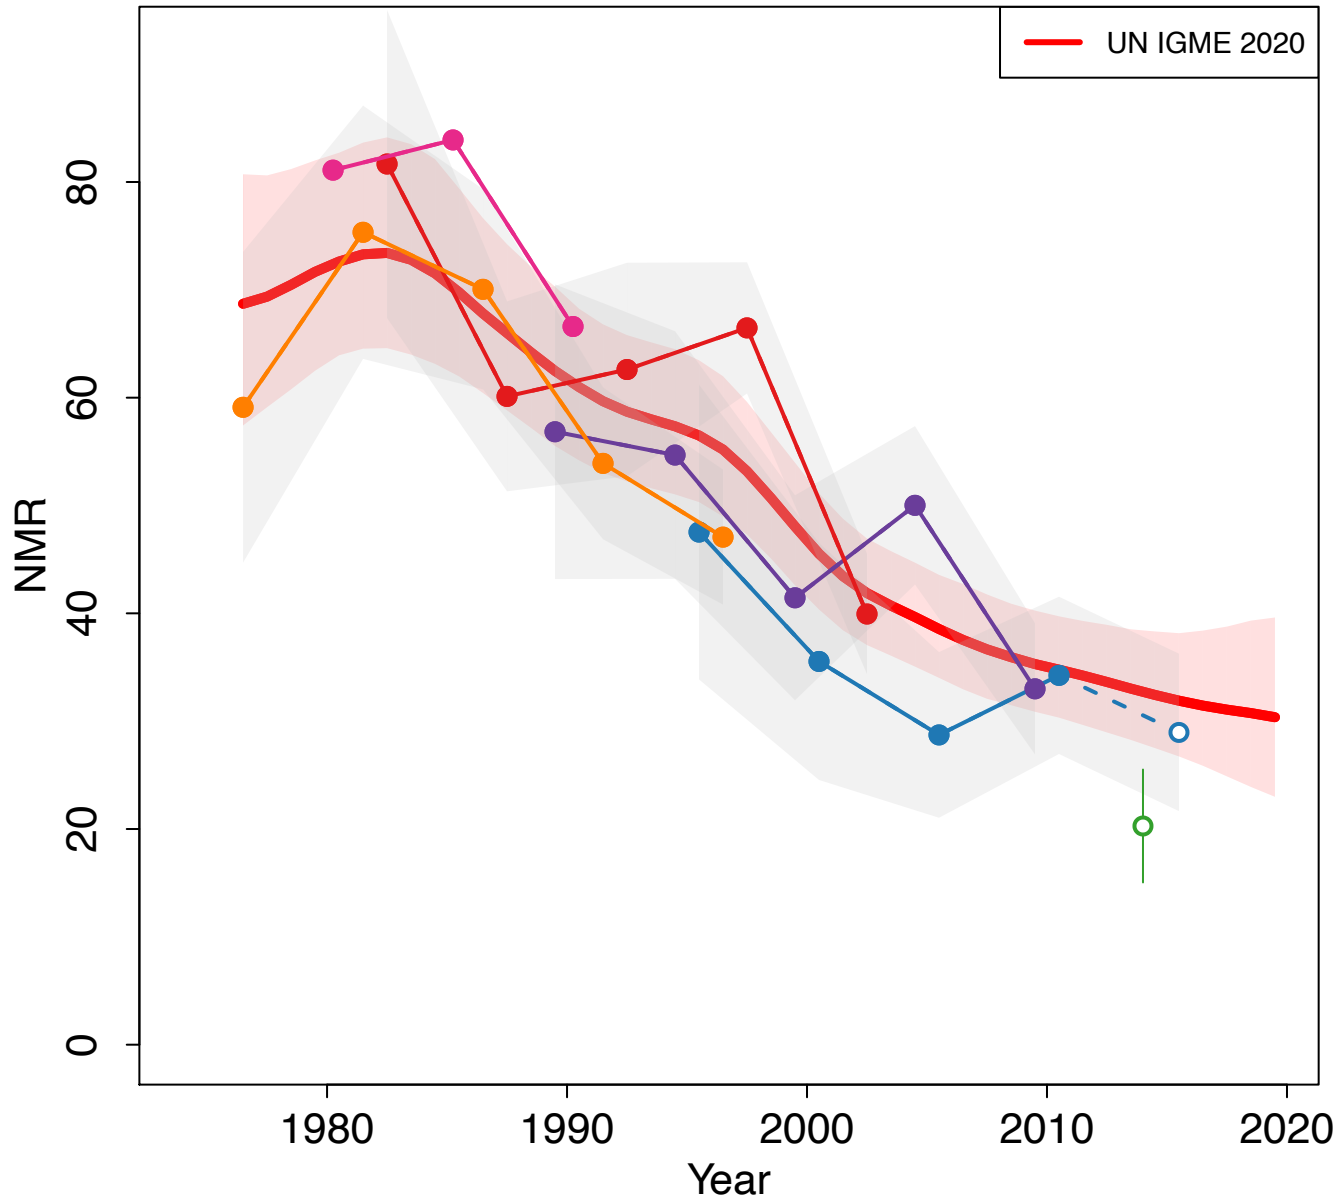

# Zoomed in

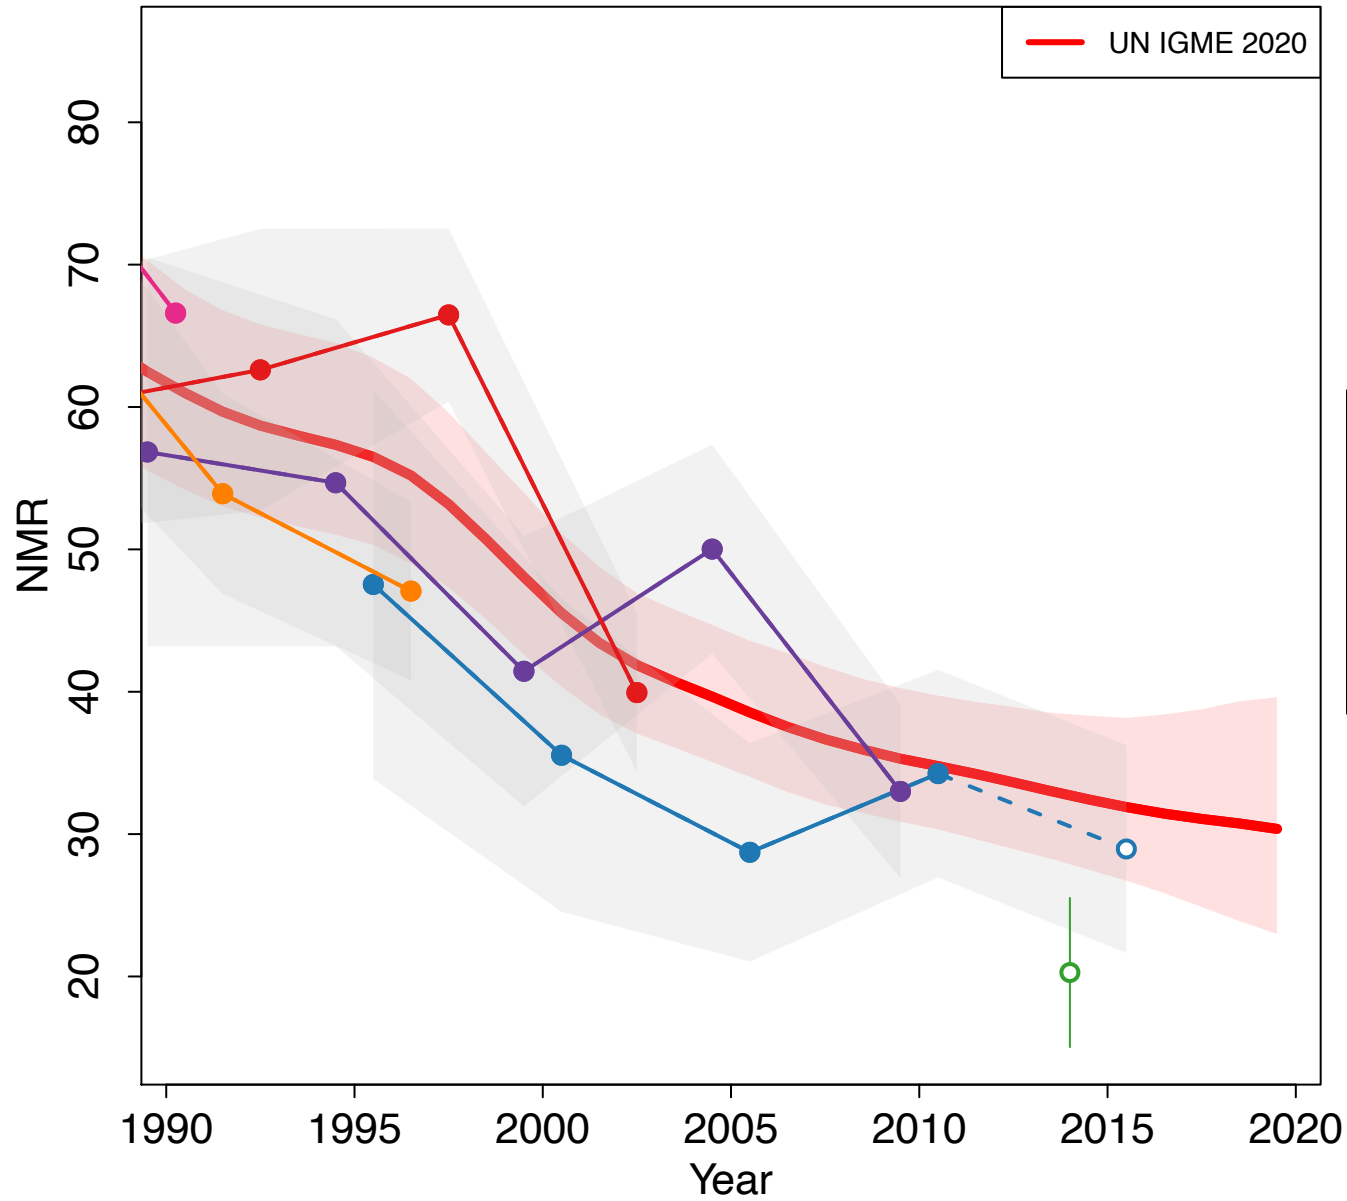

- Demographic and Health Survey 1992 (DHS)
- Demographic and Health Survey 1999 (DHS)
- Demographic and Health Survey 2005 (DHS)
- Demographic and Health Survey 2012 (DHS)
- Multiple Indicator Cluster Survey 2016 (MICS)
- Demographic and Health Survey 2018 (DHS)

# Guinea-Bissau

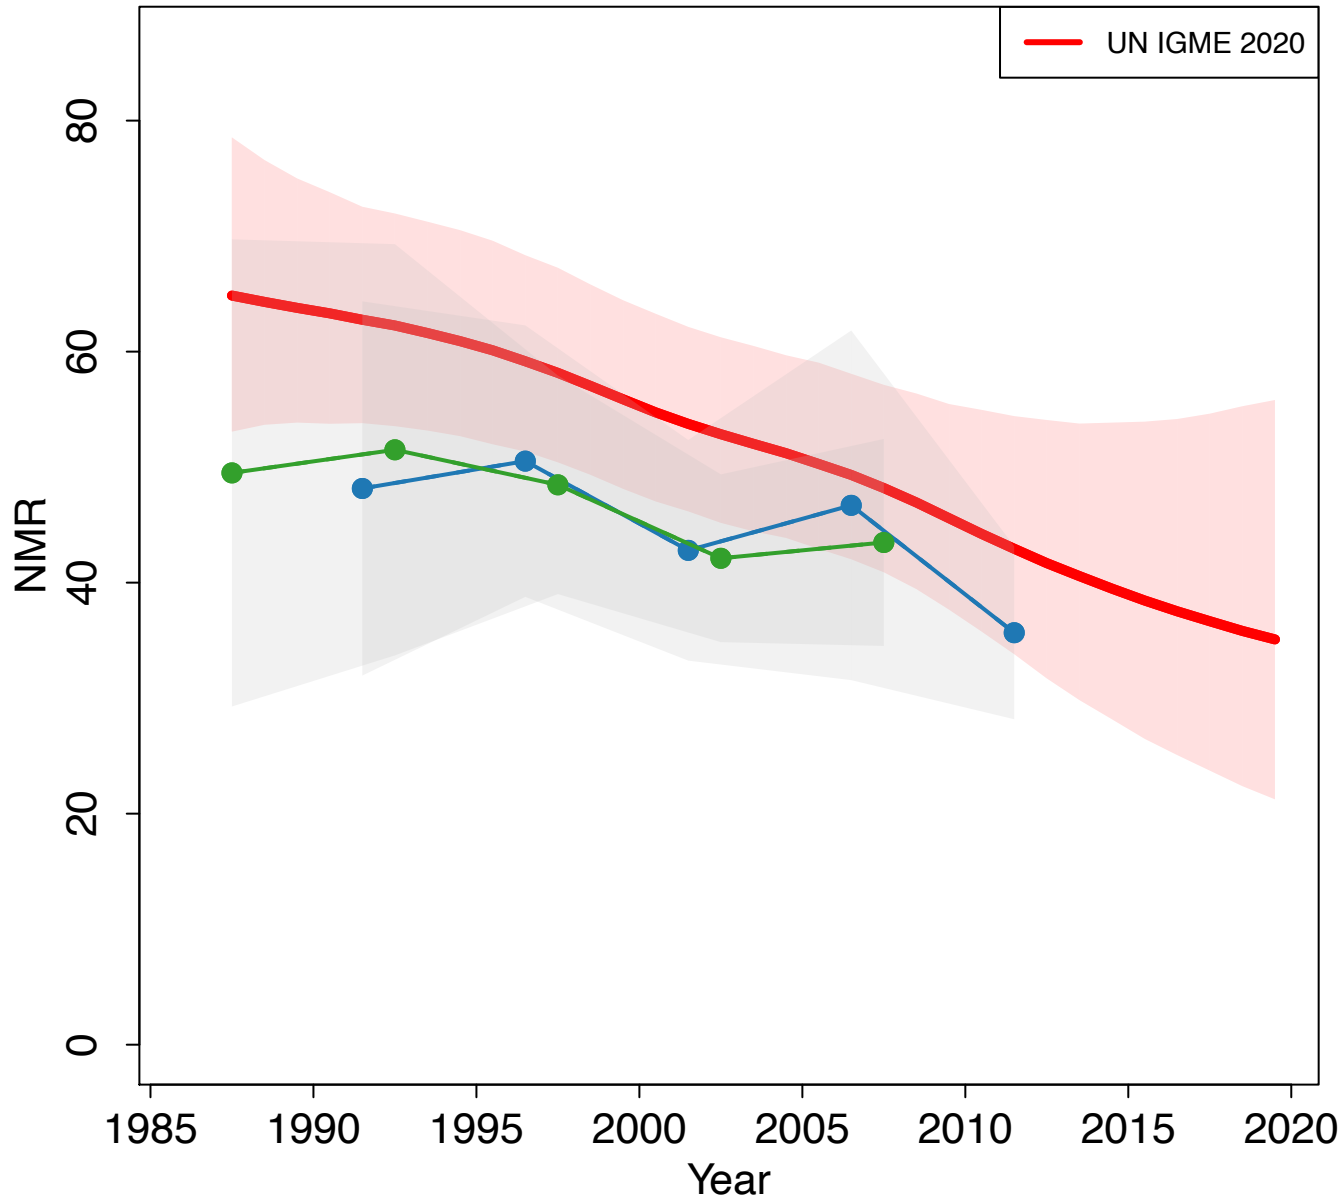

# Zoomed in

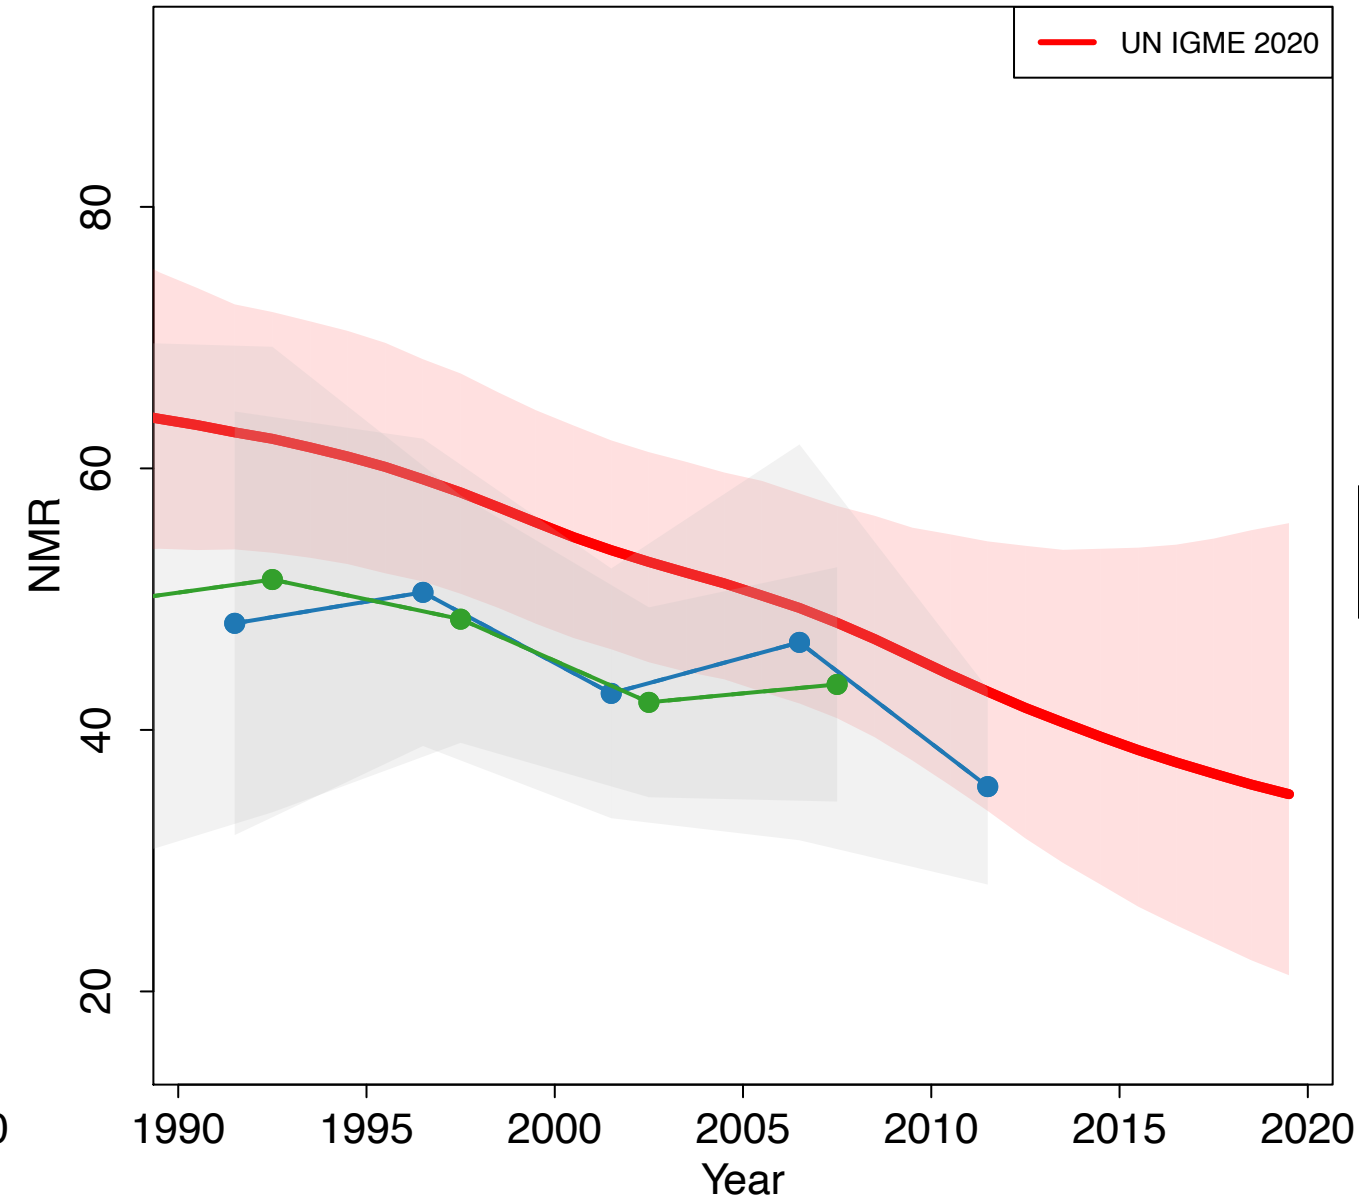

# Guyana

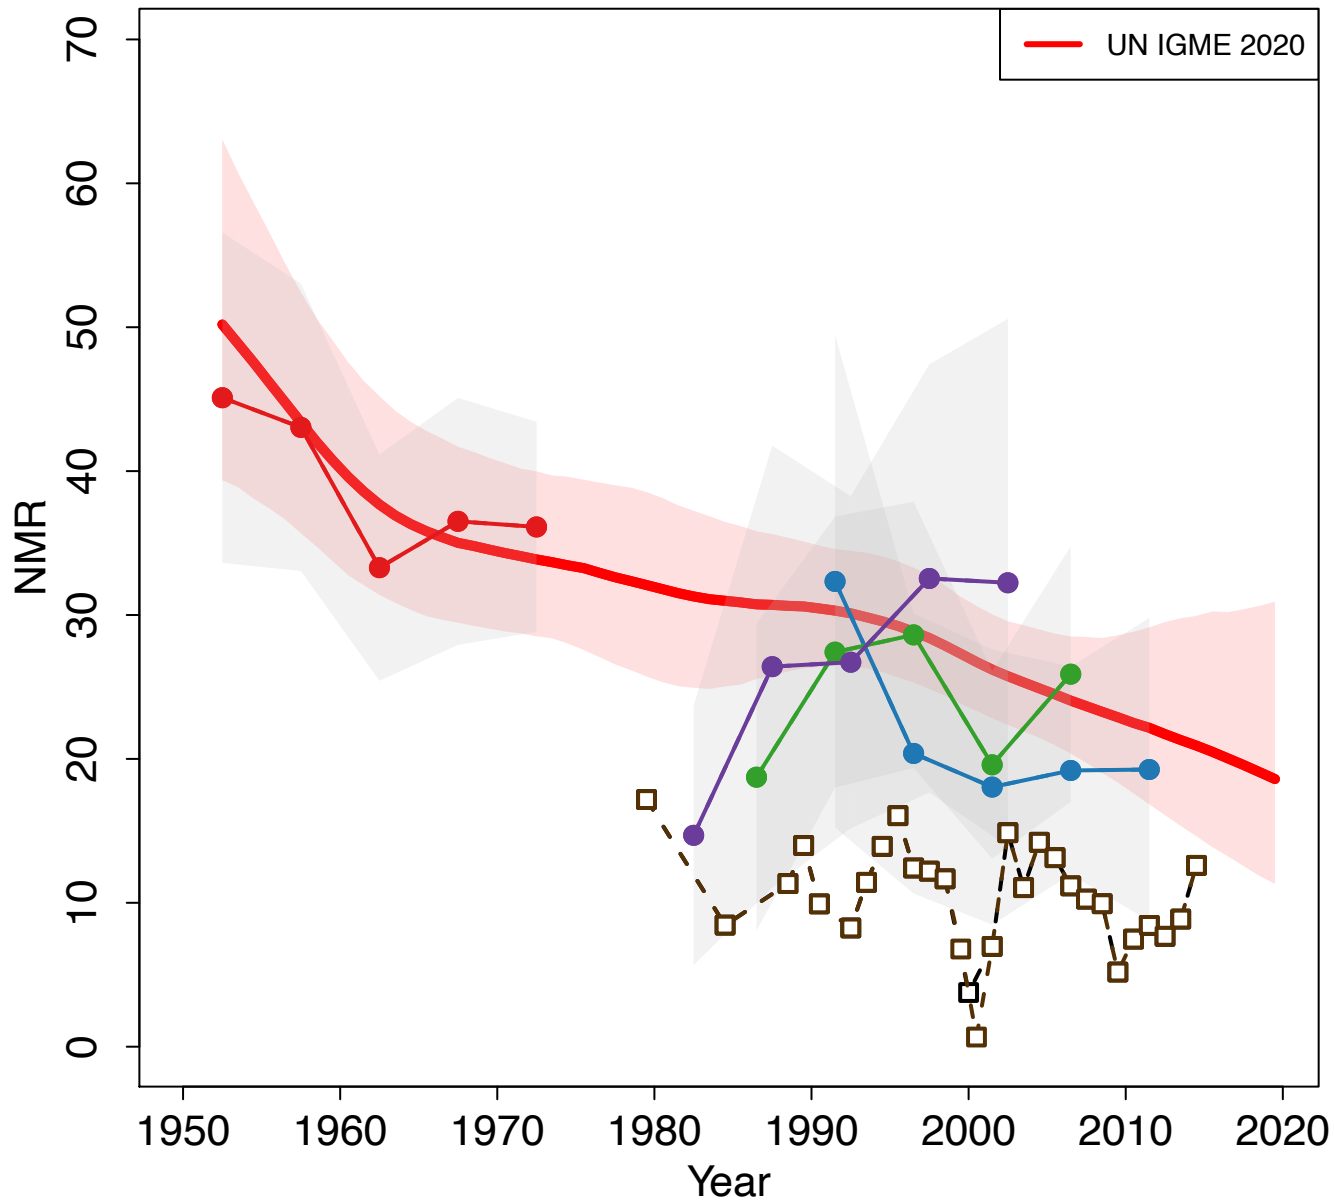

# Zoomed in

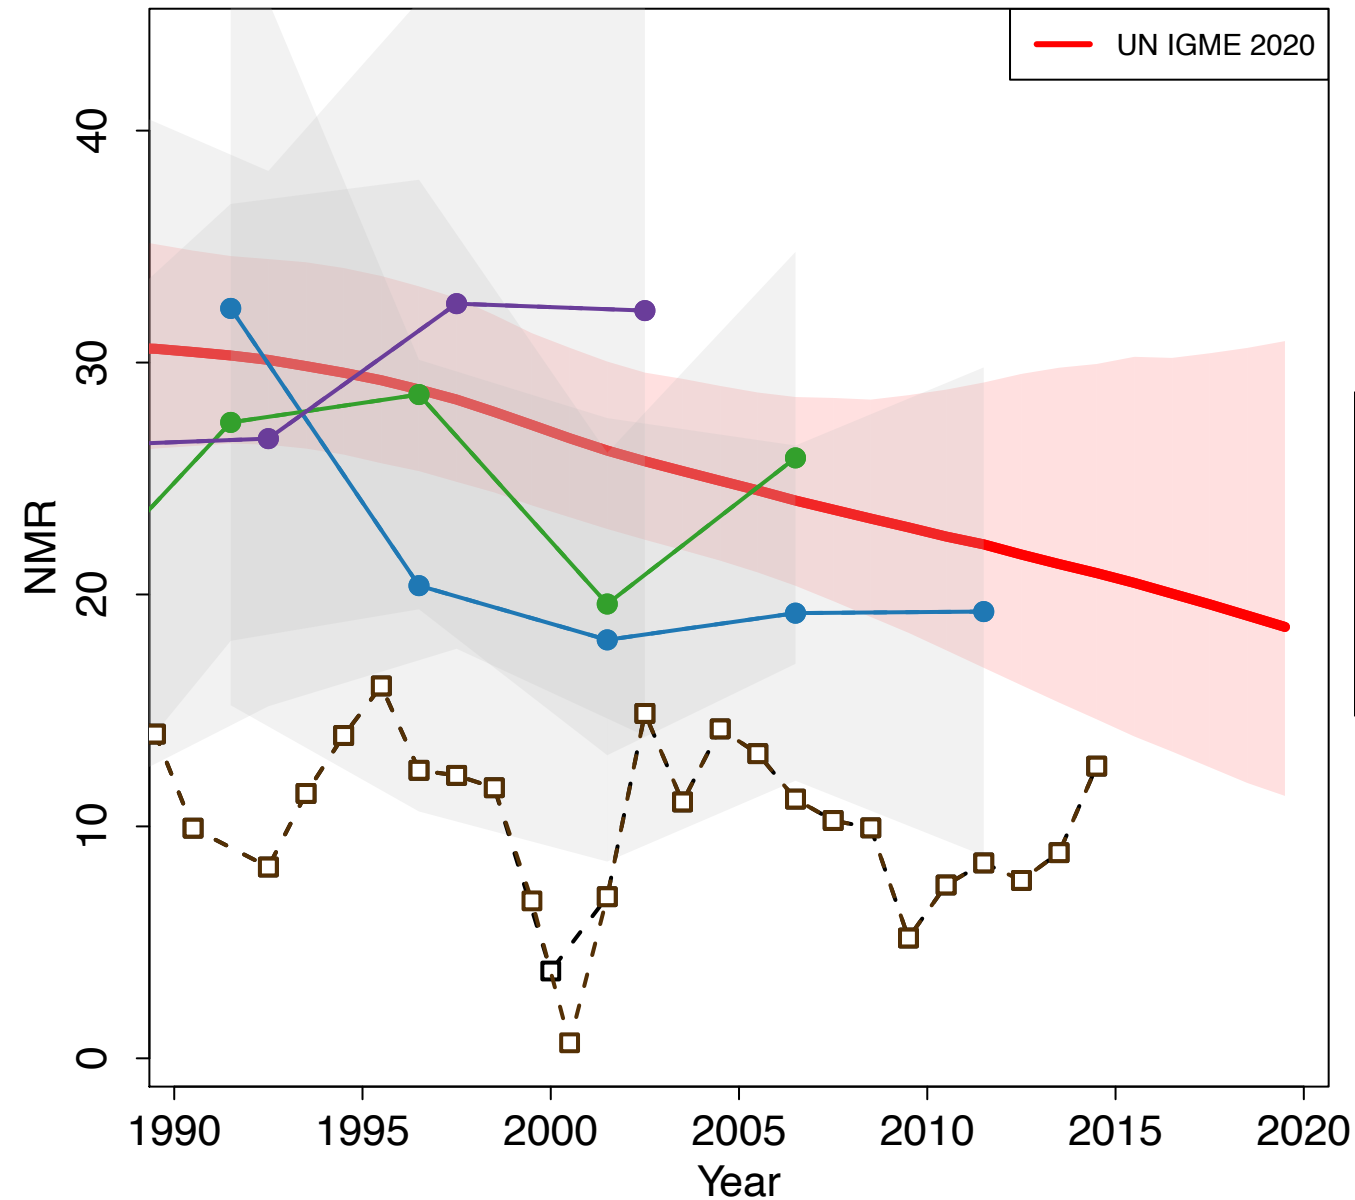

- World Fertility Survey 1975 (Other DHS)
- AIDS Indicator Survey 2005 (Other DHS)
- Demographic and Health Survey 2009 (DHS)
- Multiple Indicator Cluster Survey 2014 (MICS)
- VR WHO
- VR WHO (Recalculated)

# Haiti

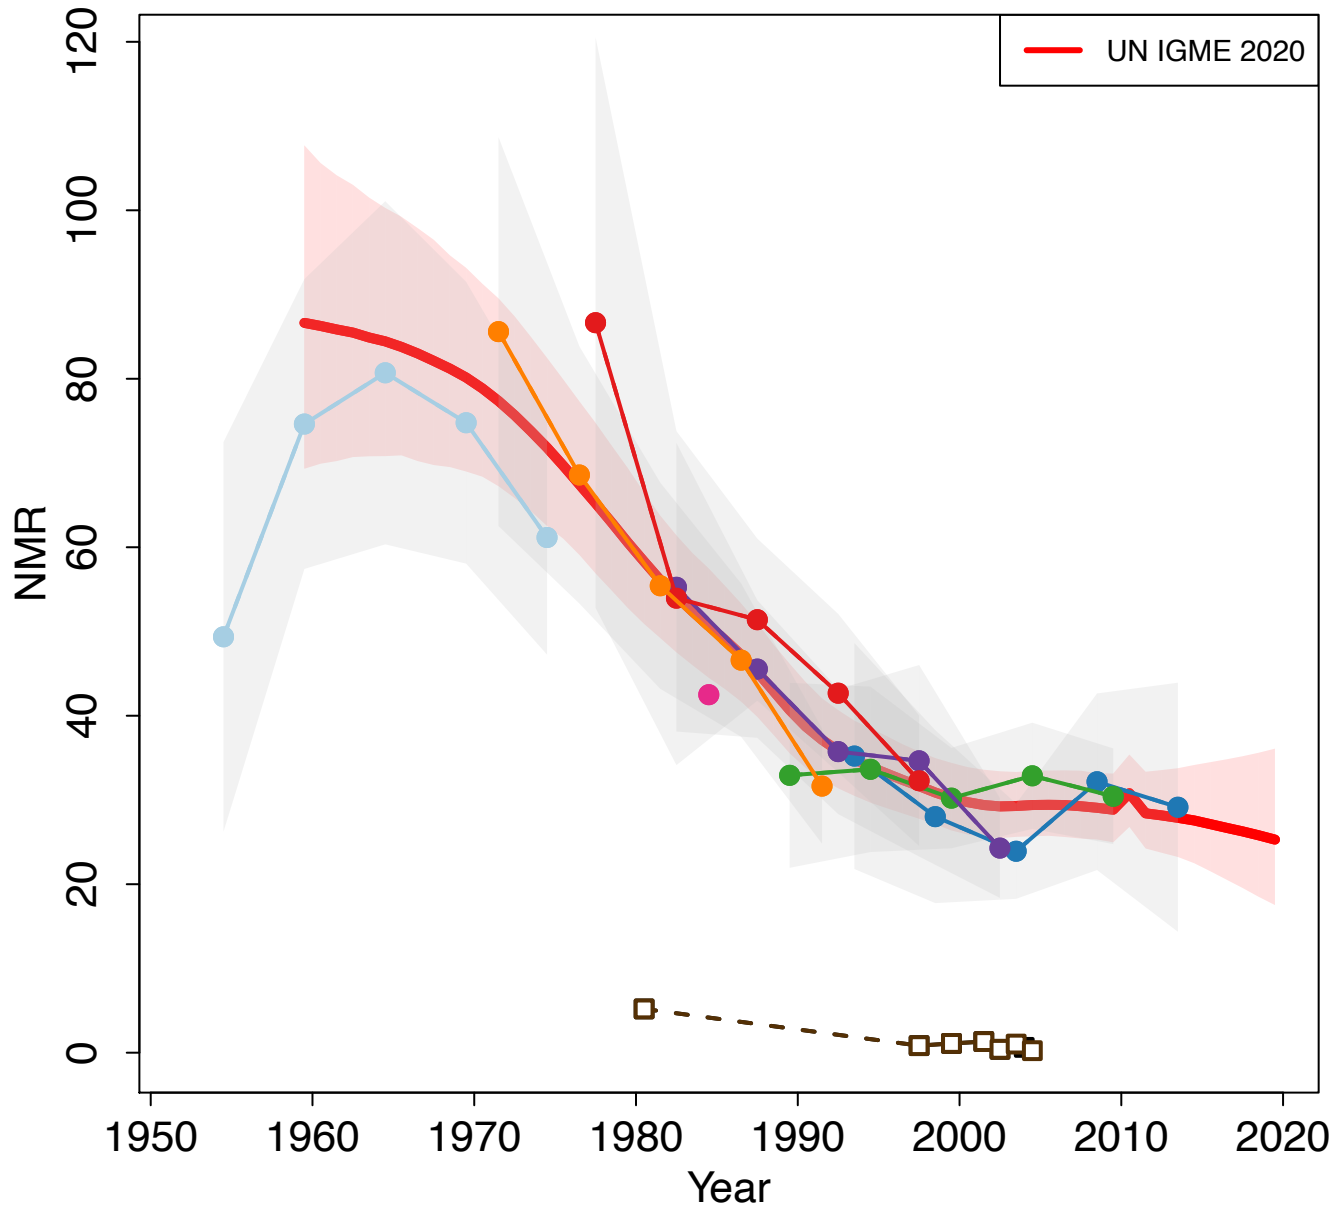

# Zoomed in

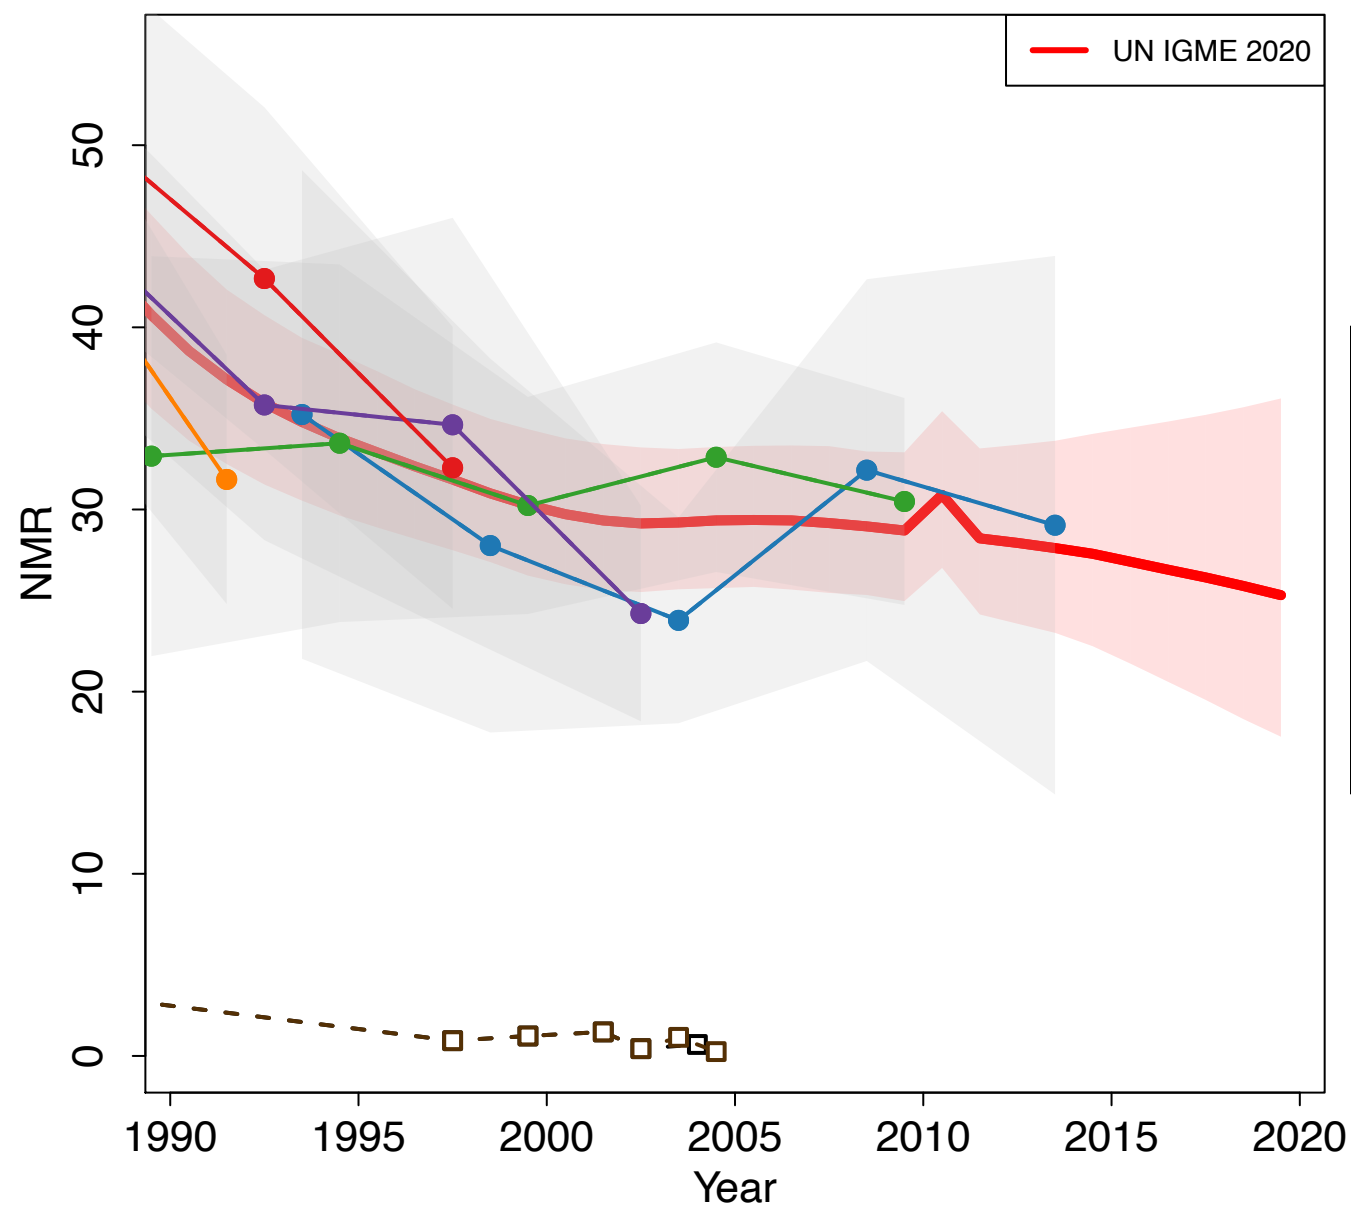

- World Fertility Survey 1977 (Other DHS)
- Mortality, morbidity and service utilization survey 1987 (Others)
- Demographic and Health Survey 1994–1995 (DHS)
- Demographic and Health Survey 2000 (DHS)
- Demographic and Health Survey 2005–2006 (DHS)
- Demographic and Health Survey 2012 (DHS)
- Demographic and Health Survey 2016–2017 (DHS)
- VR WHO
- VR WHO (Recalculated)

# Honduras

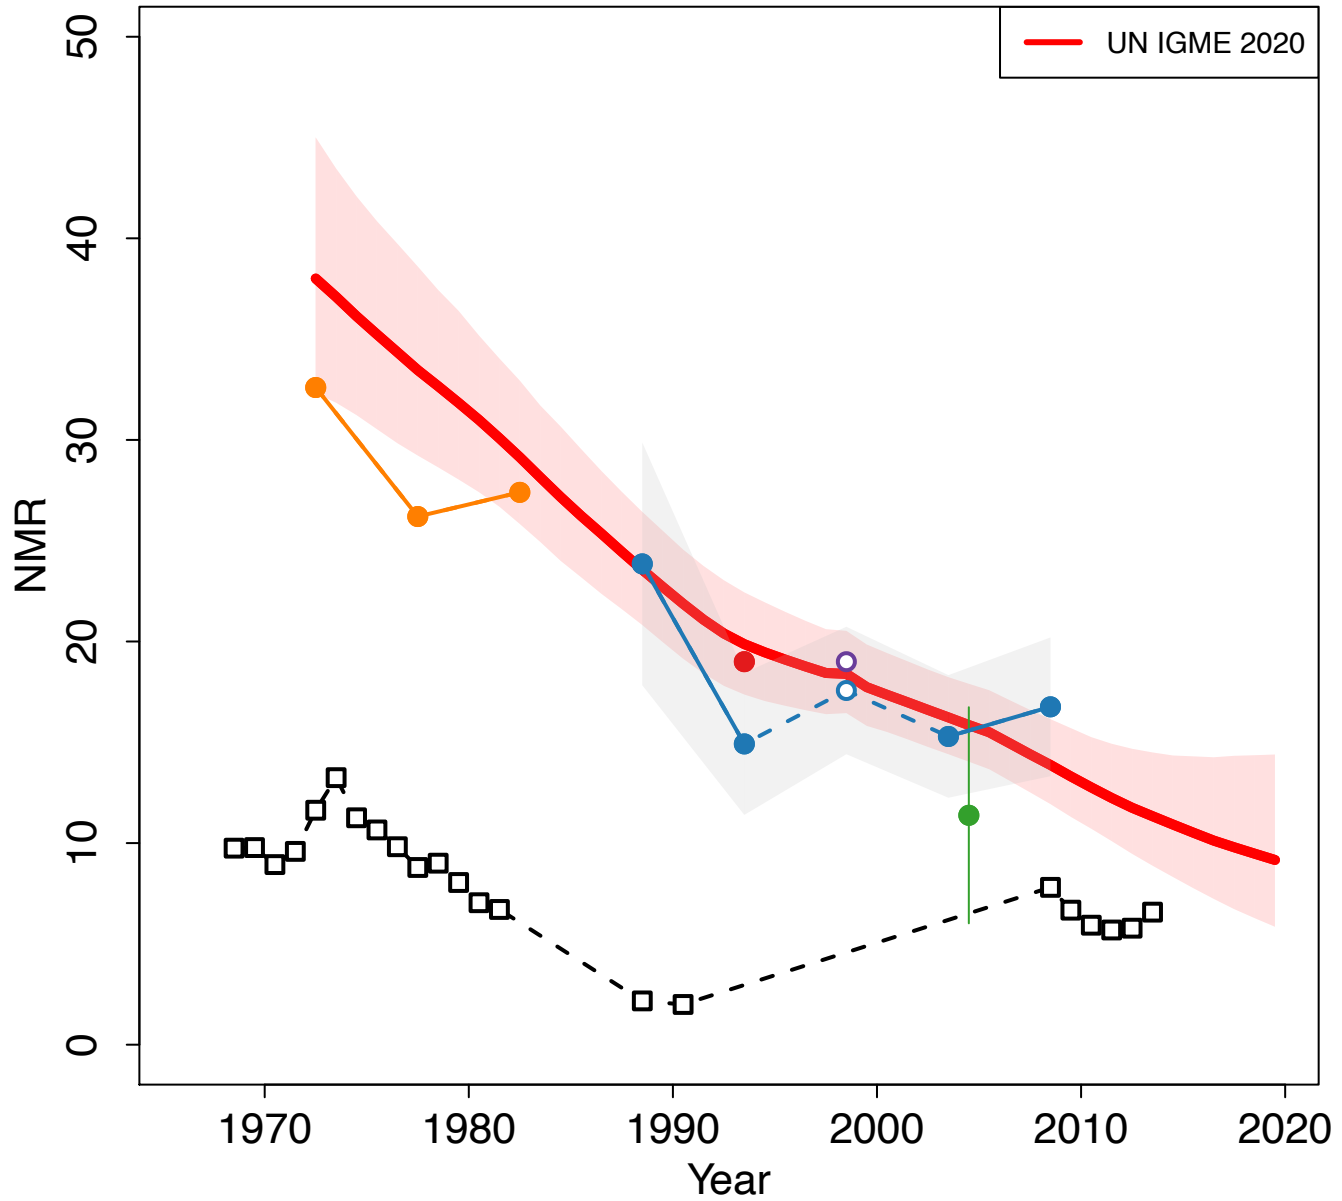

# Zoomed in

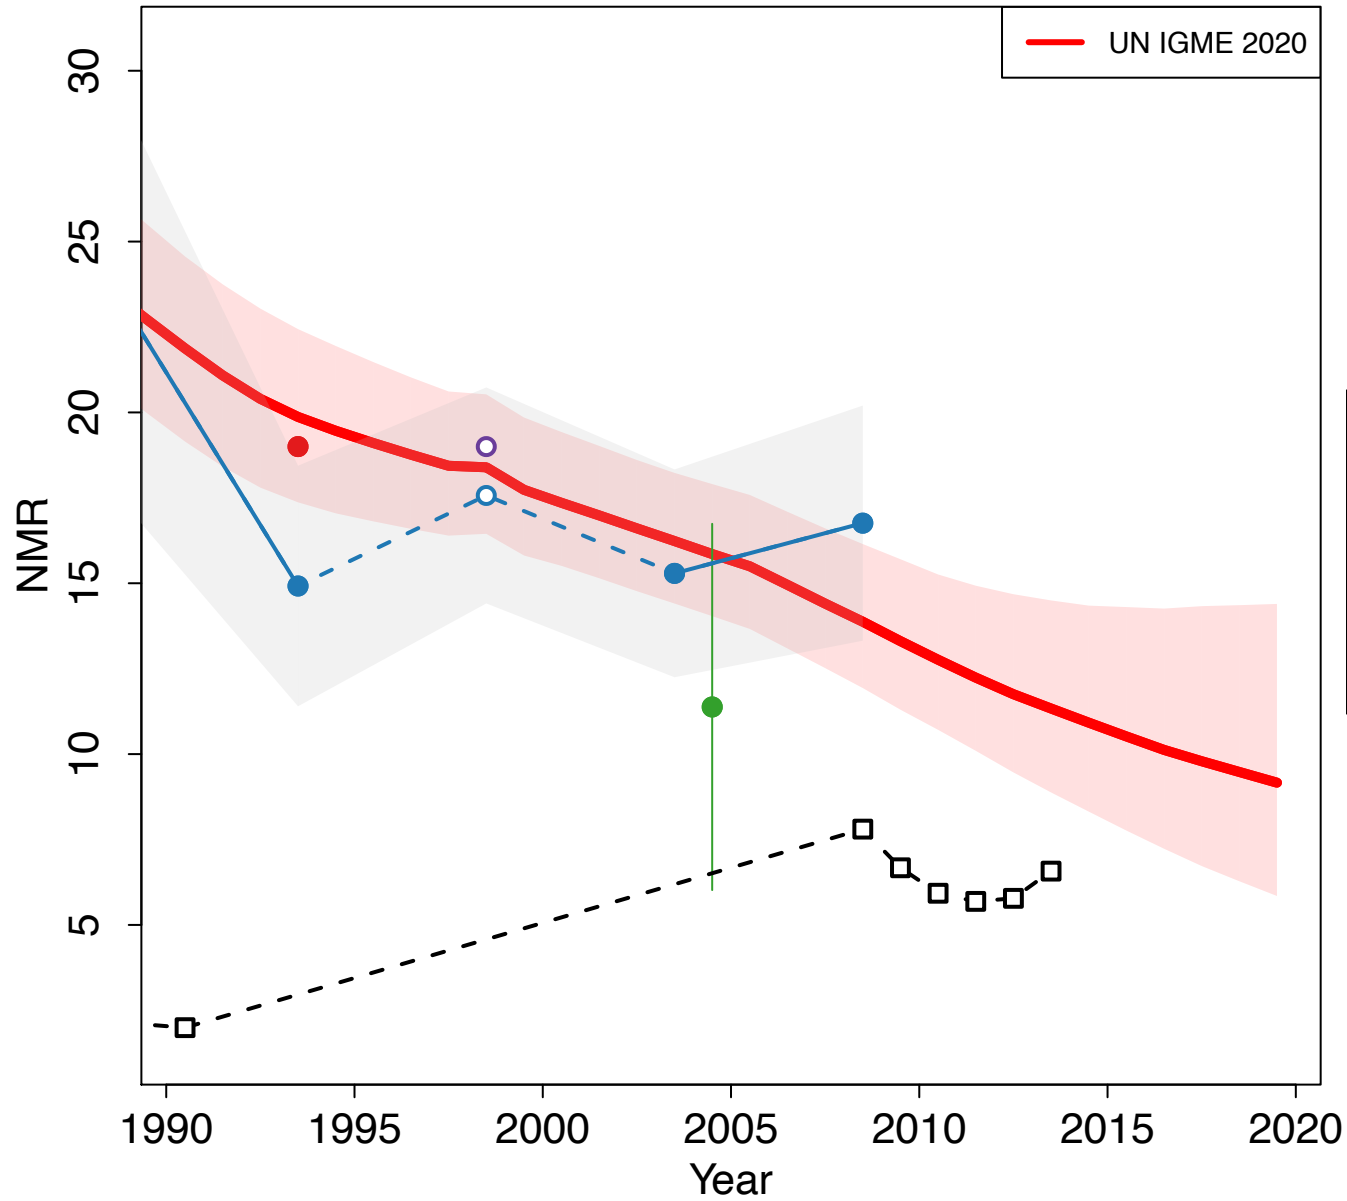

- National Survey of Epidemiology and Family Health 1987 (Others)
- National Survey of Epidemiology and Family Health 1996 (Others)
- National Survey of Epidemiology and Family Health 2001 (Others)
- Demographic and Health Survey 2005–2006 (DHS)
- Demographic and Health Survey 2011–2012 (DHS)
- VR WHO



# Hungary

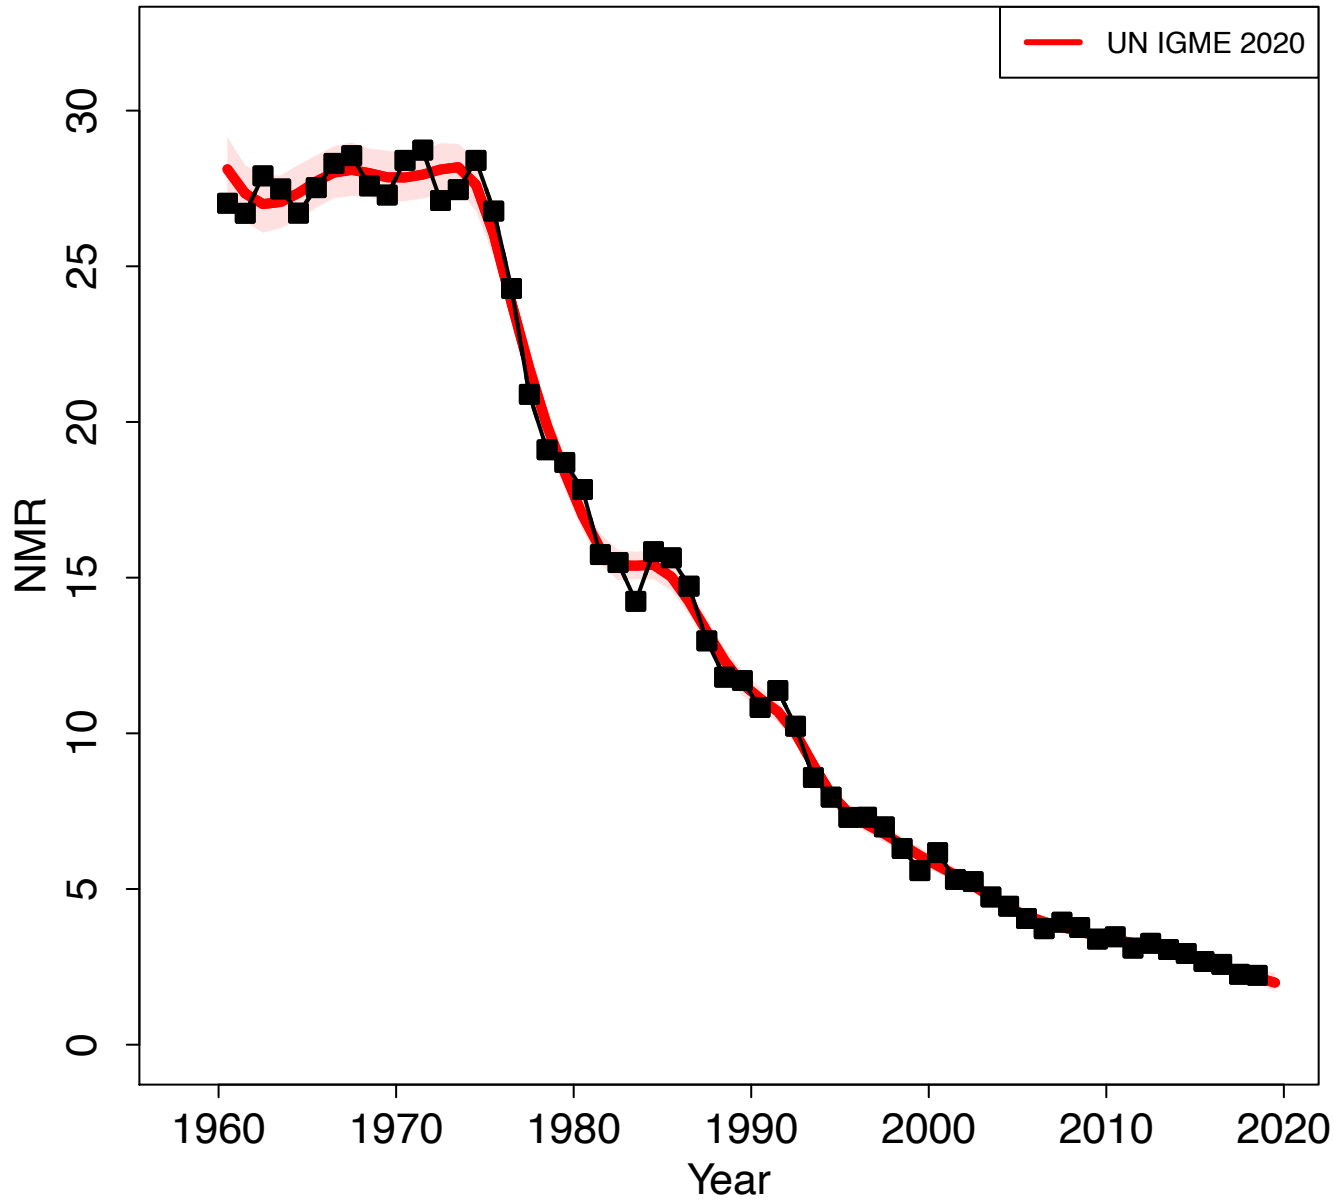

# Zoomed in

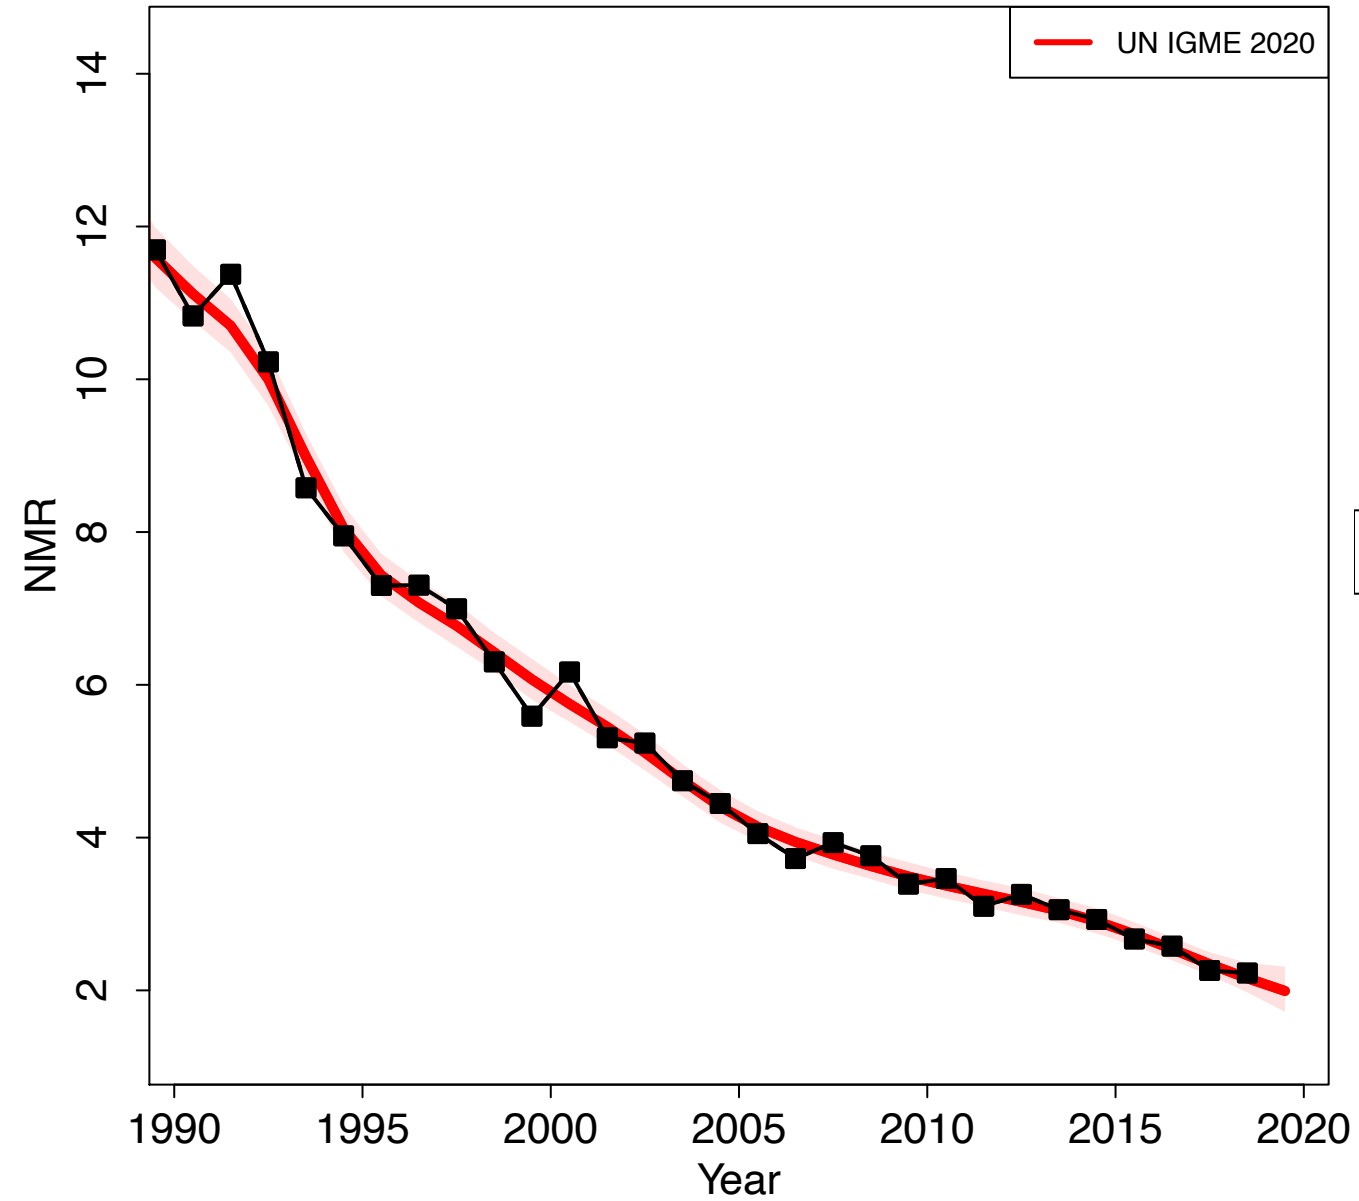

# Iceland

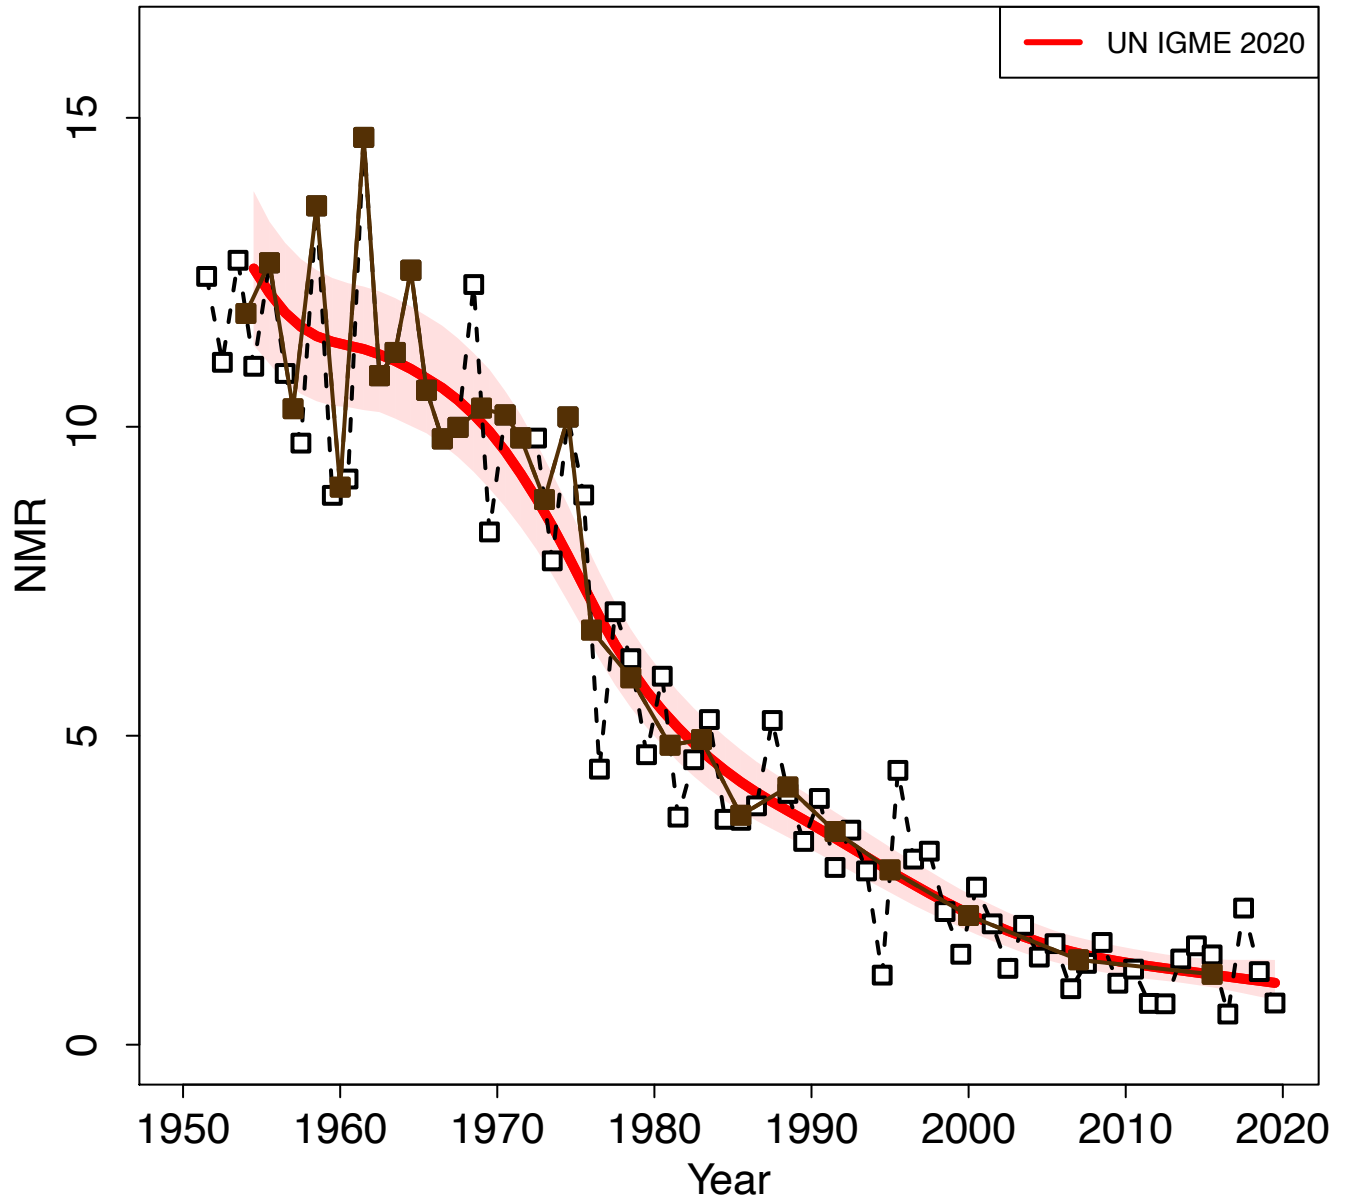

# Zoomed in

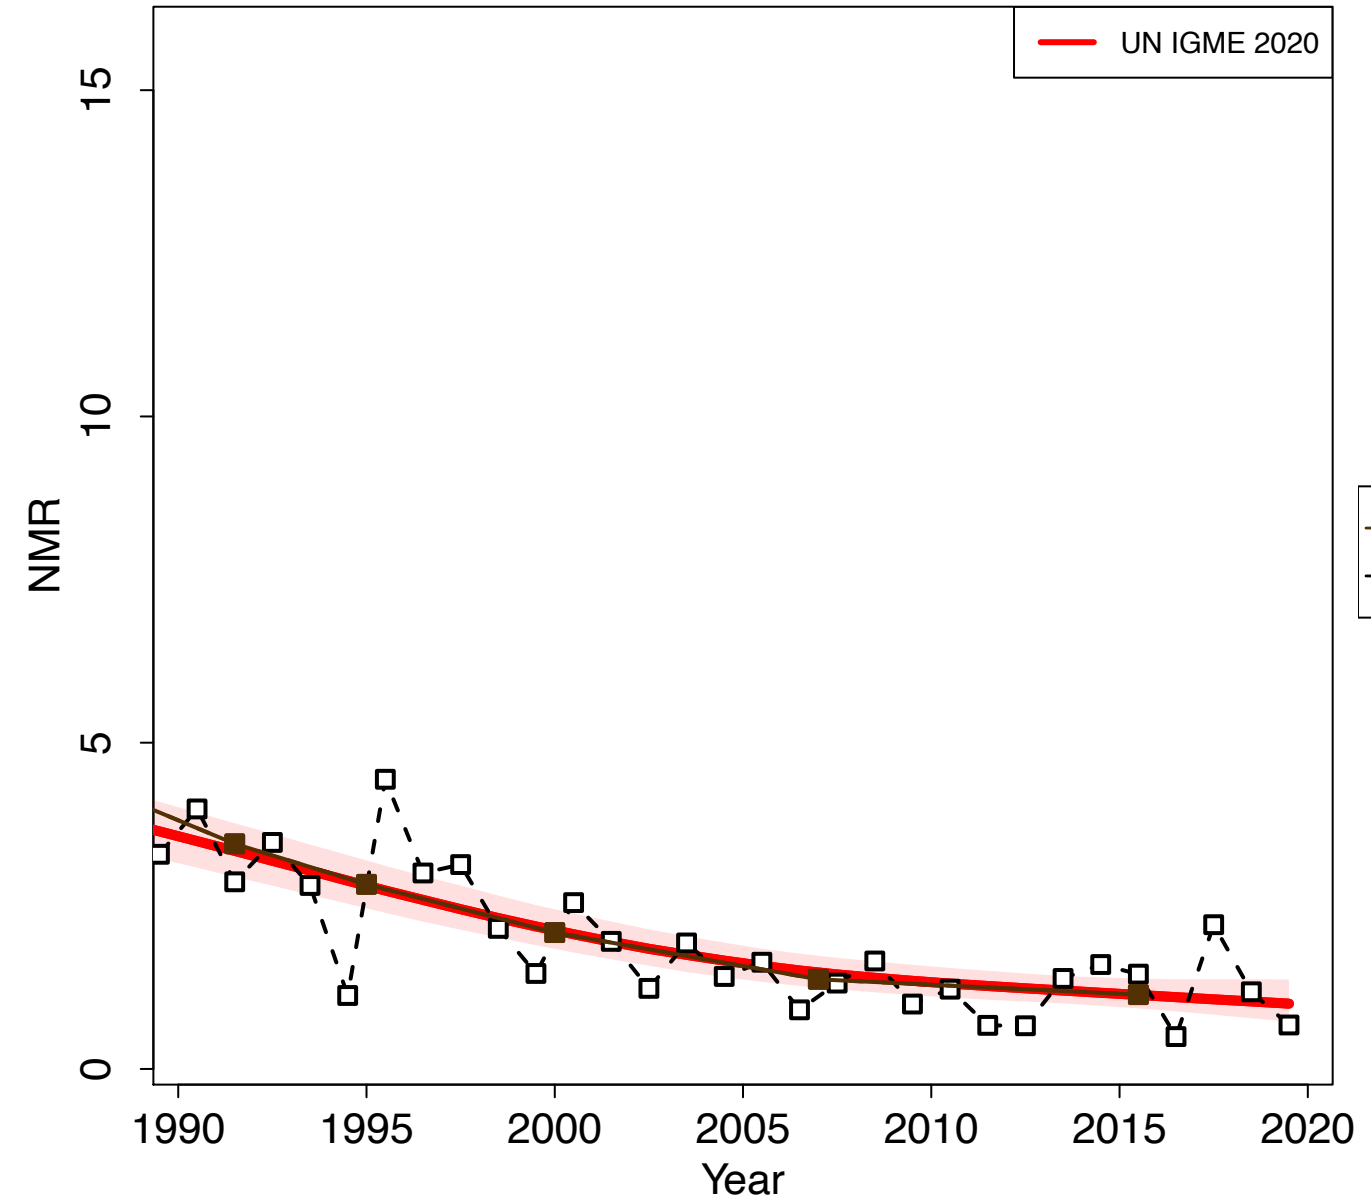

# India

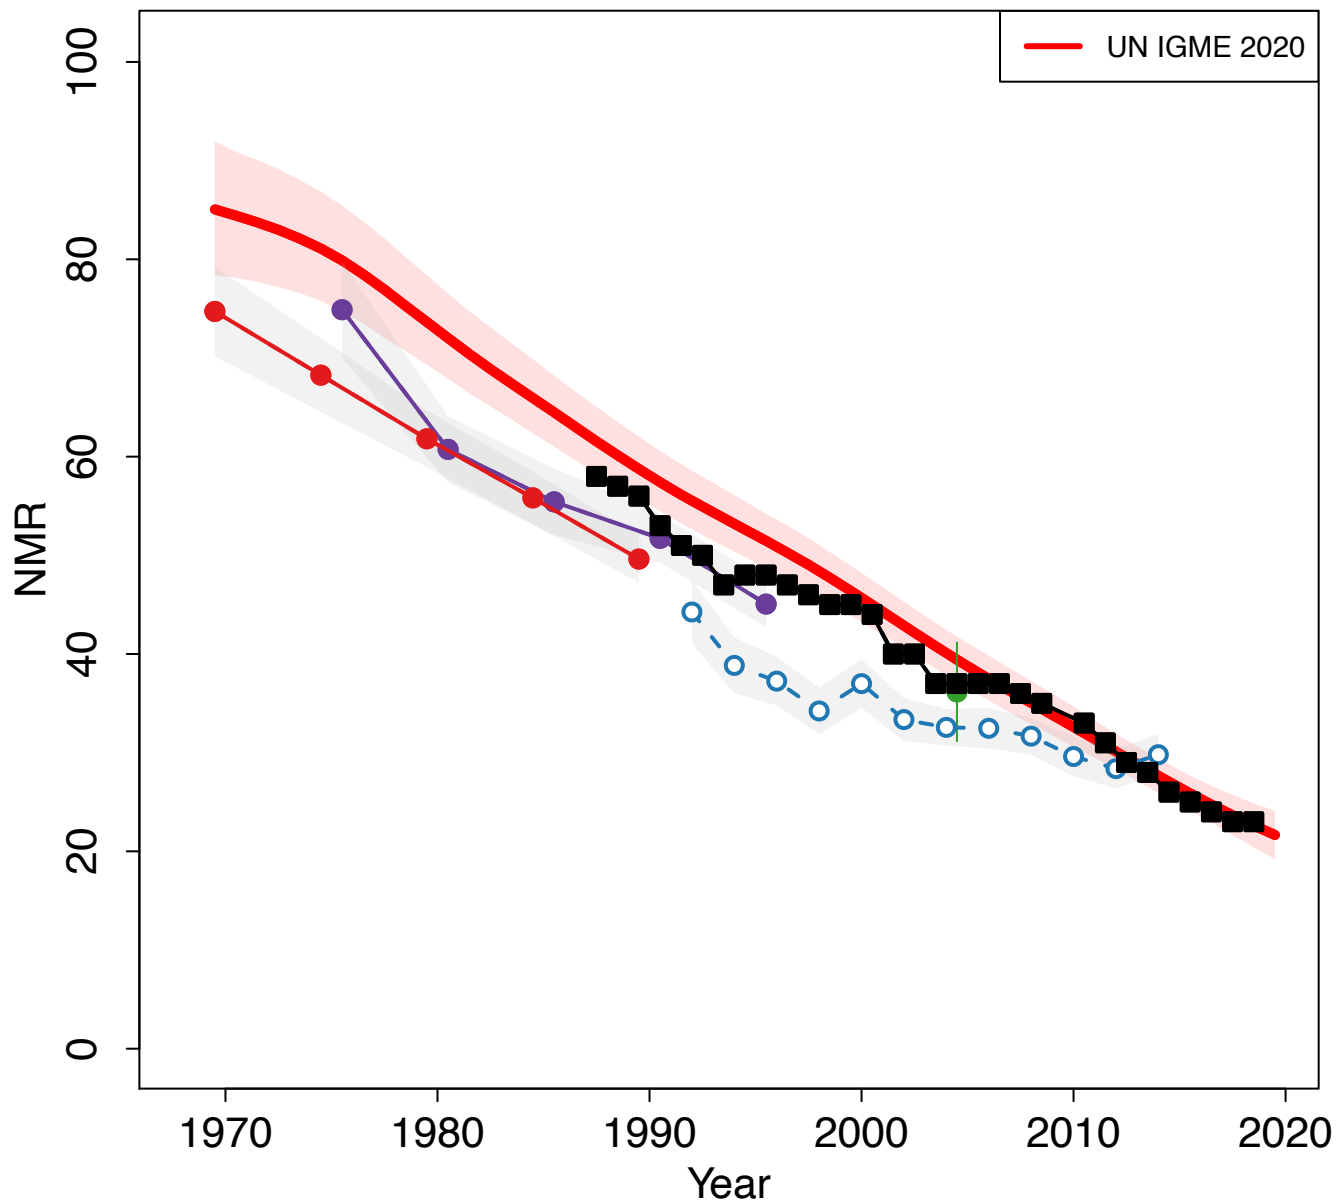

# Zoomed in

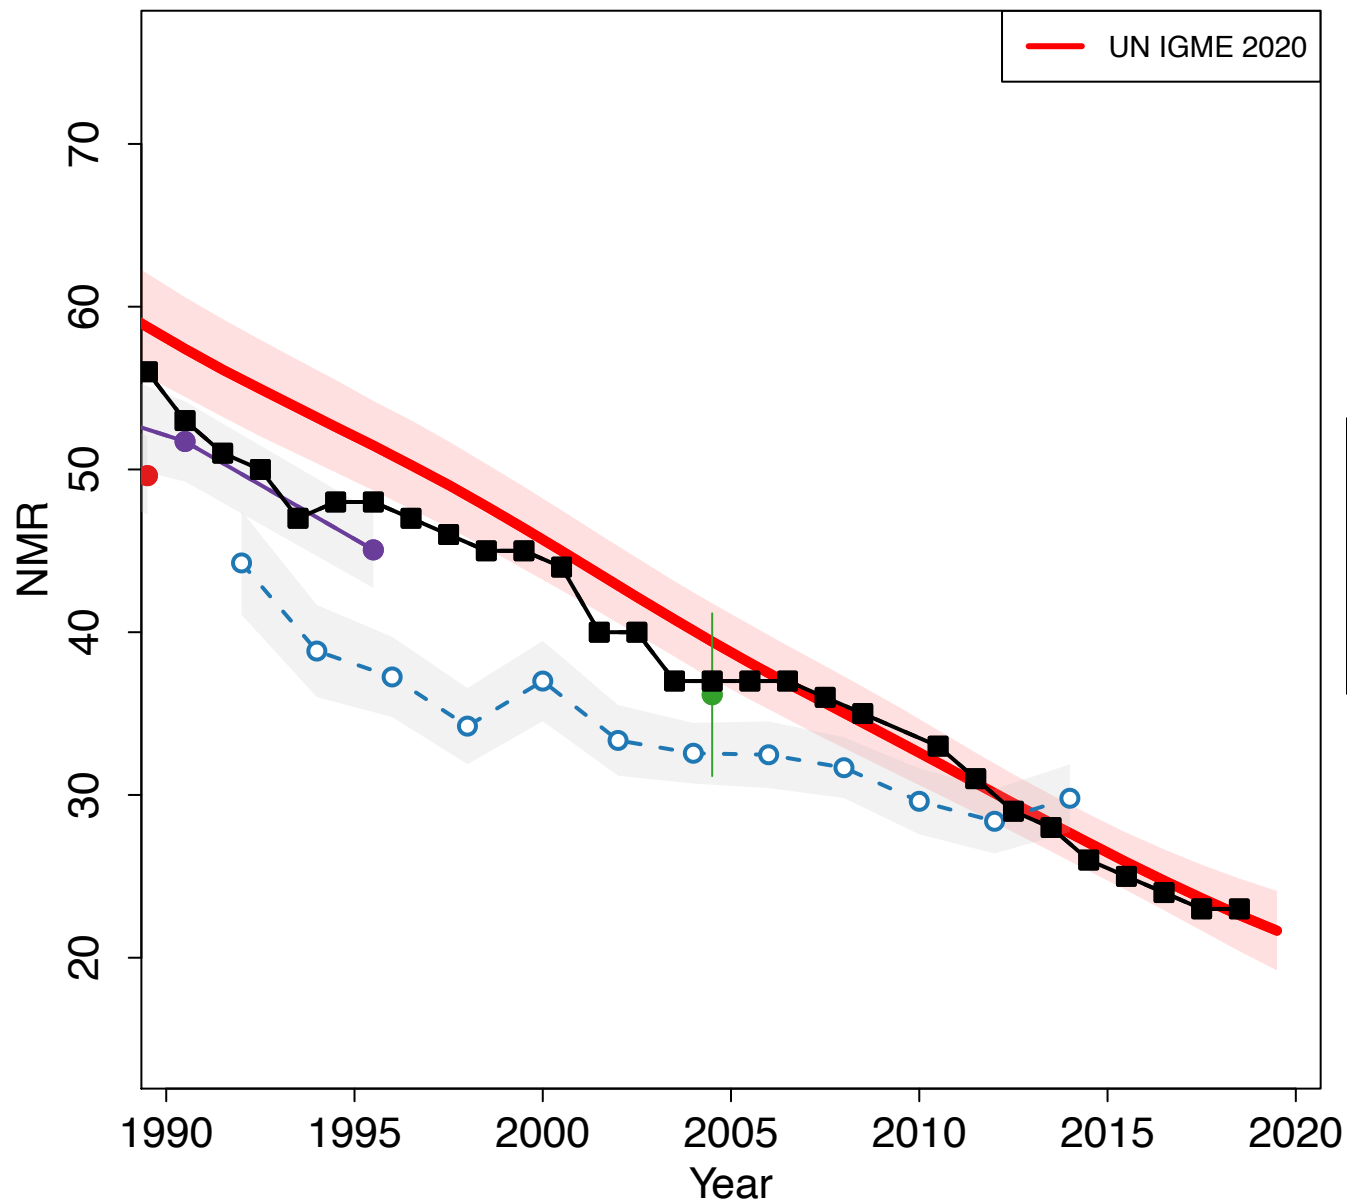

# Indonesia

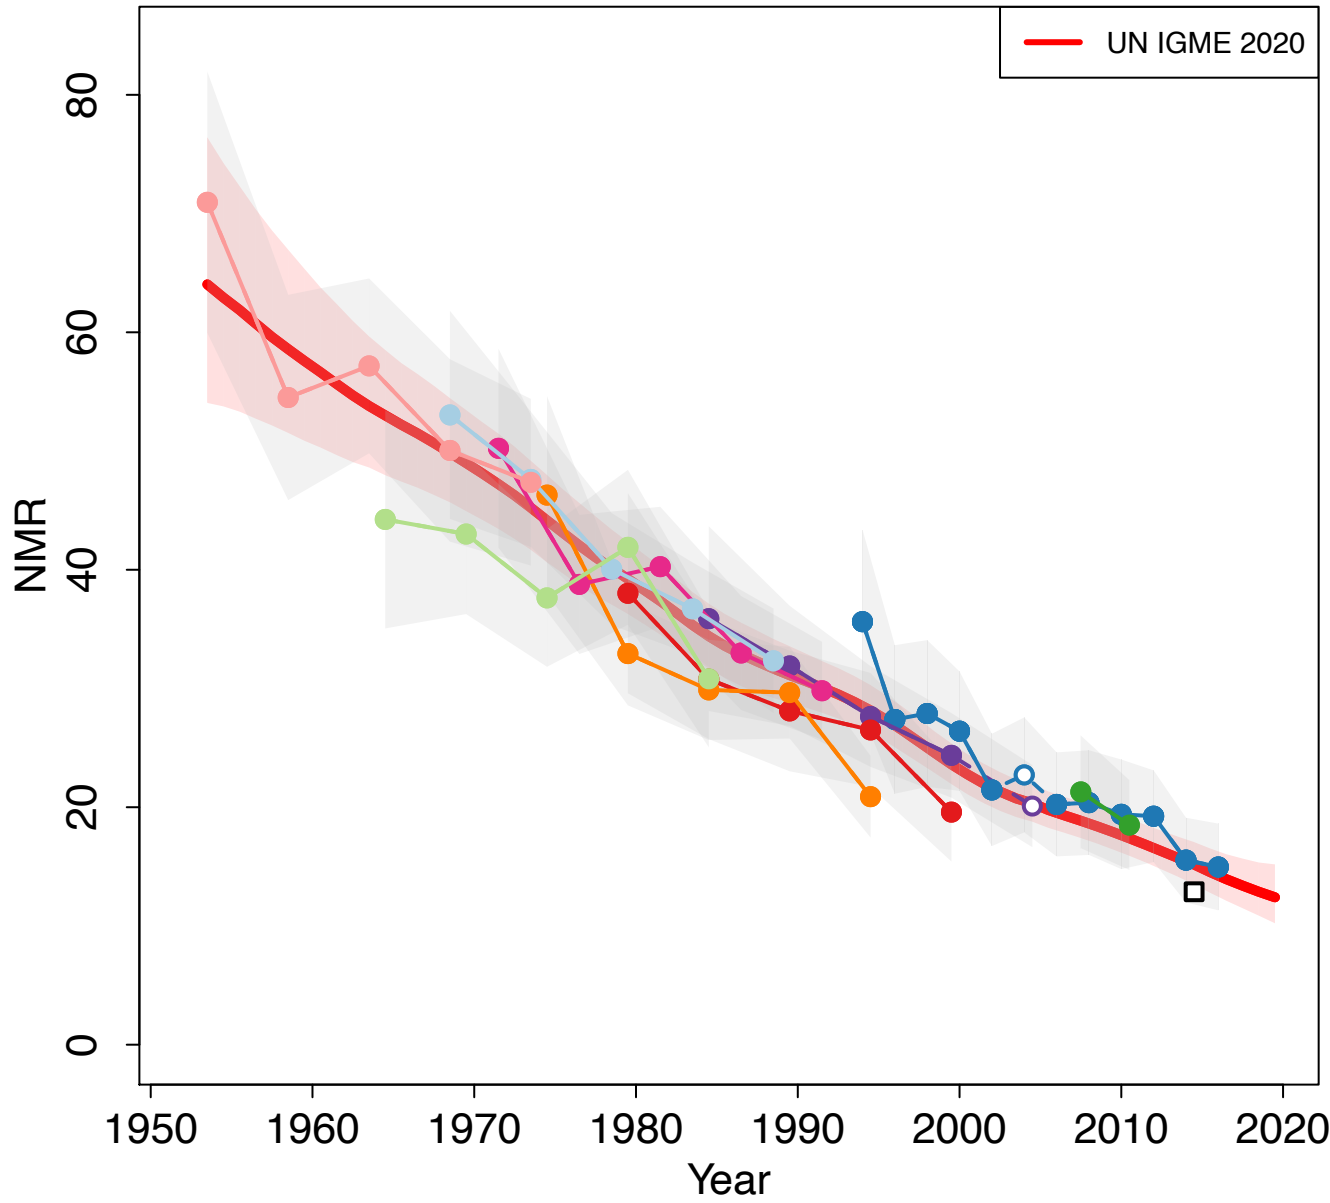

# Zoomed in

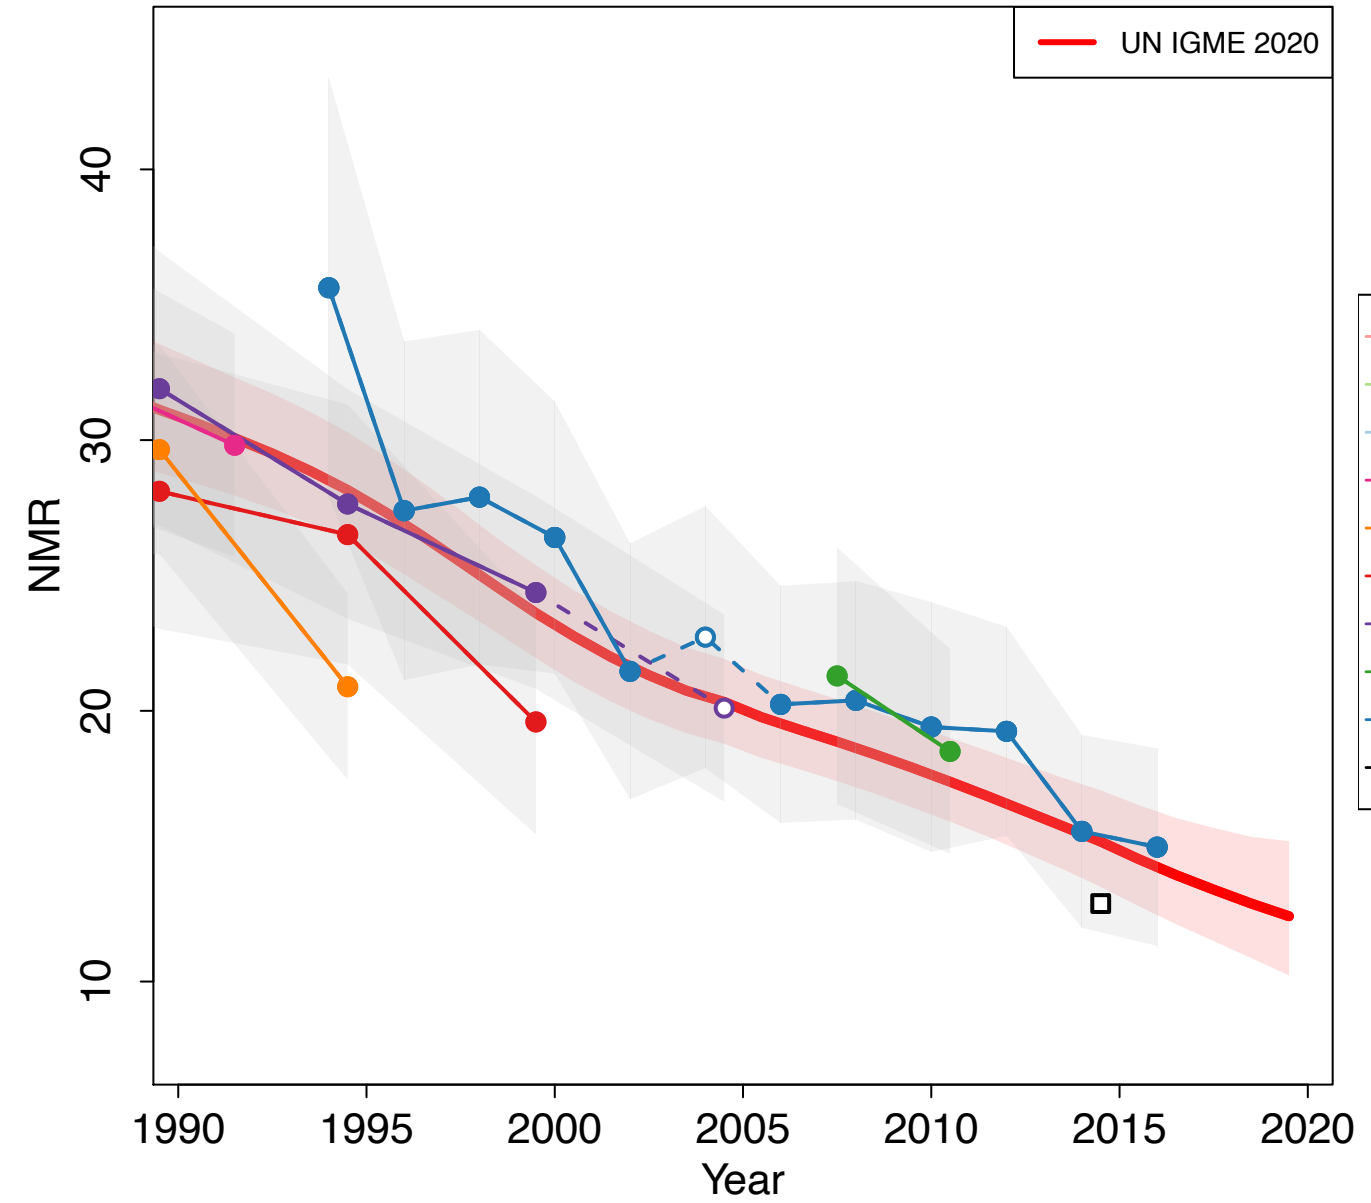

- World Fertility Survey 1976 (Other DHS)
- Demographic and Health Survey 1987 (DHS)
- Demographic and Health Survey 1991 (DHS)
- Demographic and Health Survey 1994 (DHS)
- Demographic and Health Survey 1997 (DHS)
- Demographic and Health Survey 2002-2003 (DHS)
- Demographic and Health Survey 2007 (DHS)
- Demographic and Health Survey 2012 (DHS)
- Demographic and Health Survey 2017 (DHS)
- SVR from Report on Sample Vital Registration System 2014

# Iran (Islamic Republic of)

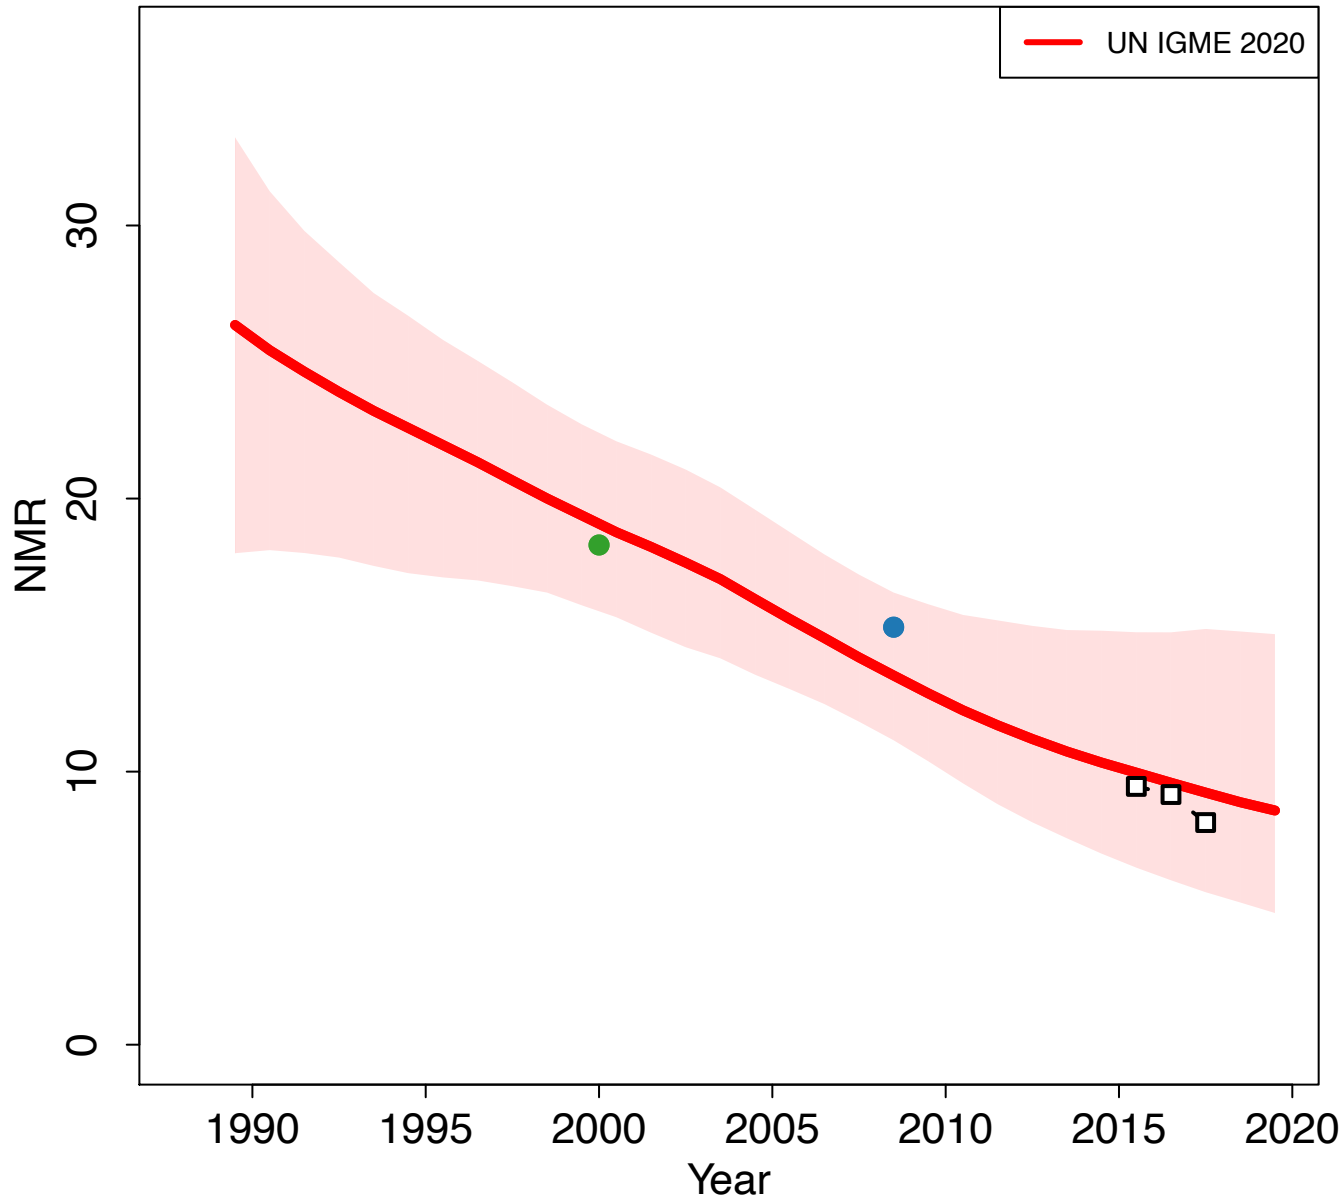

# Zoomed in

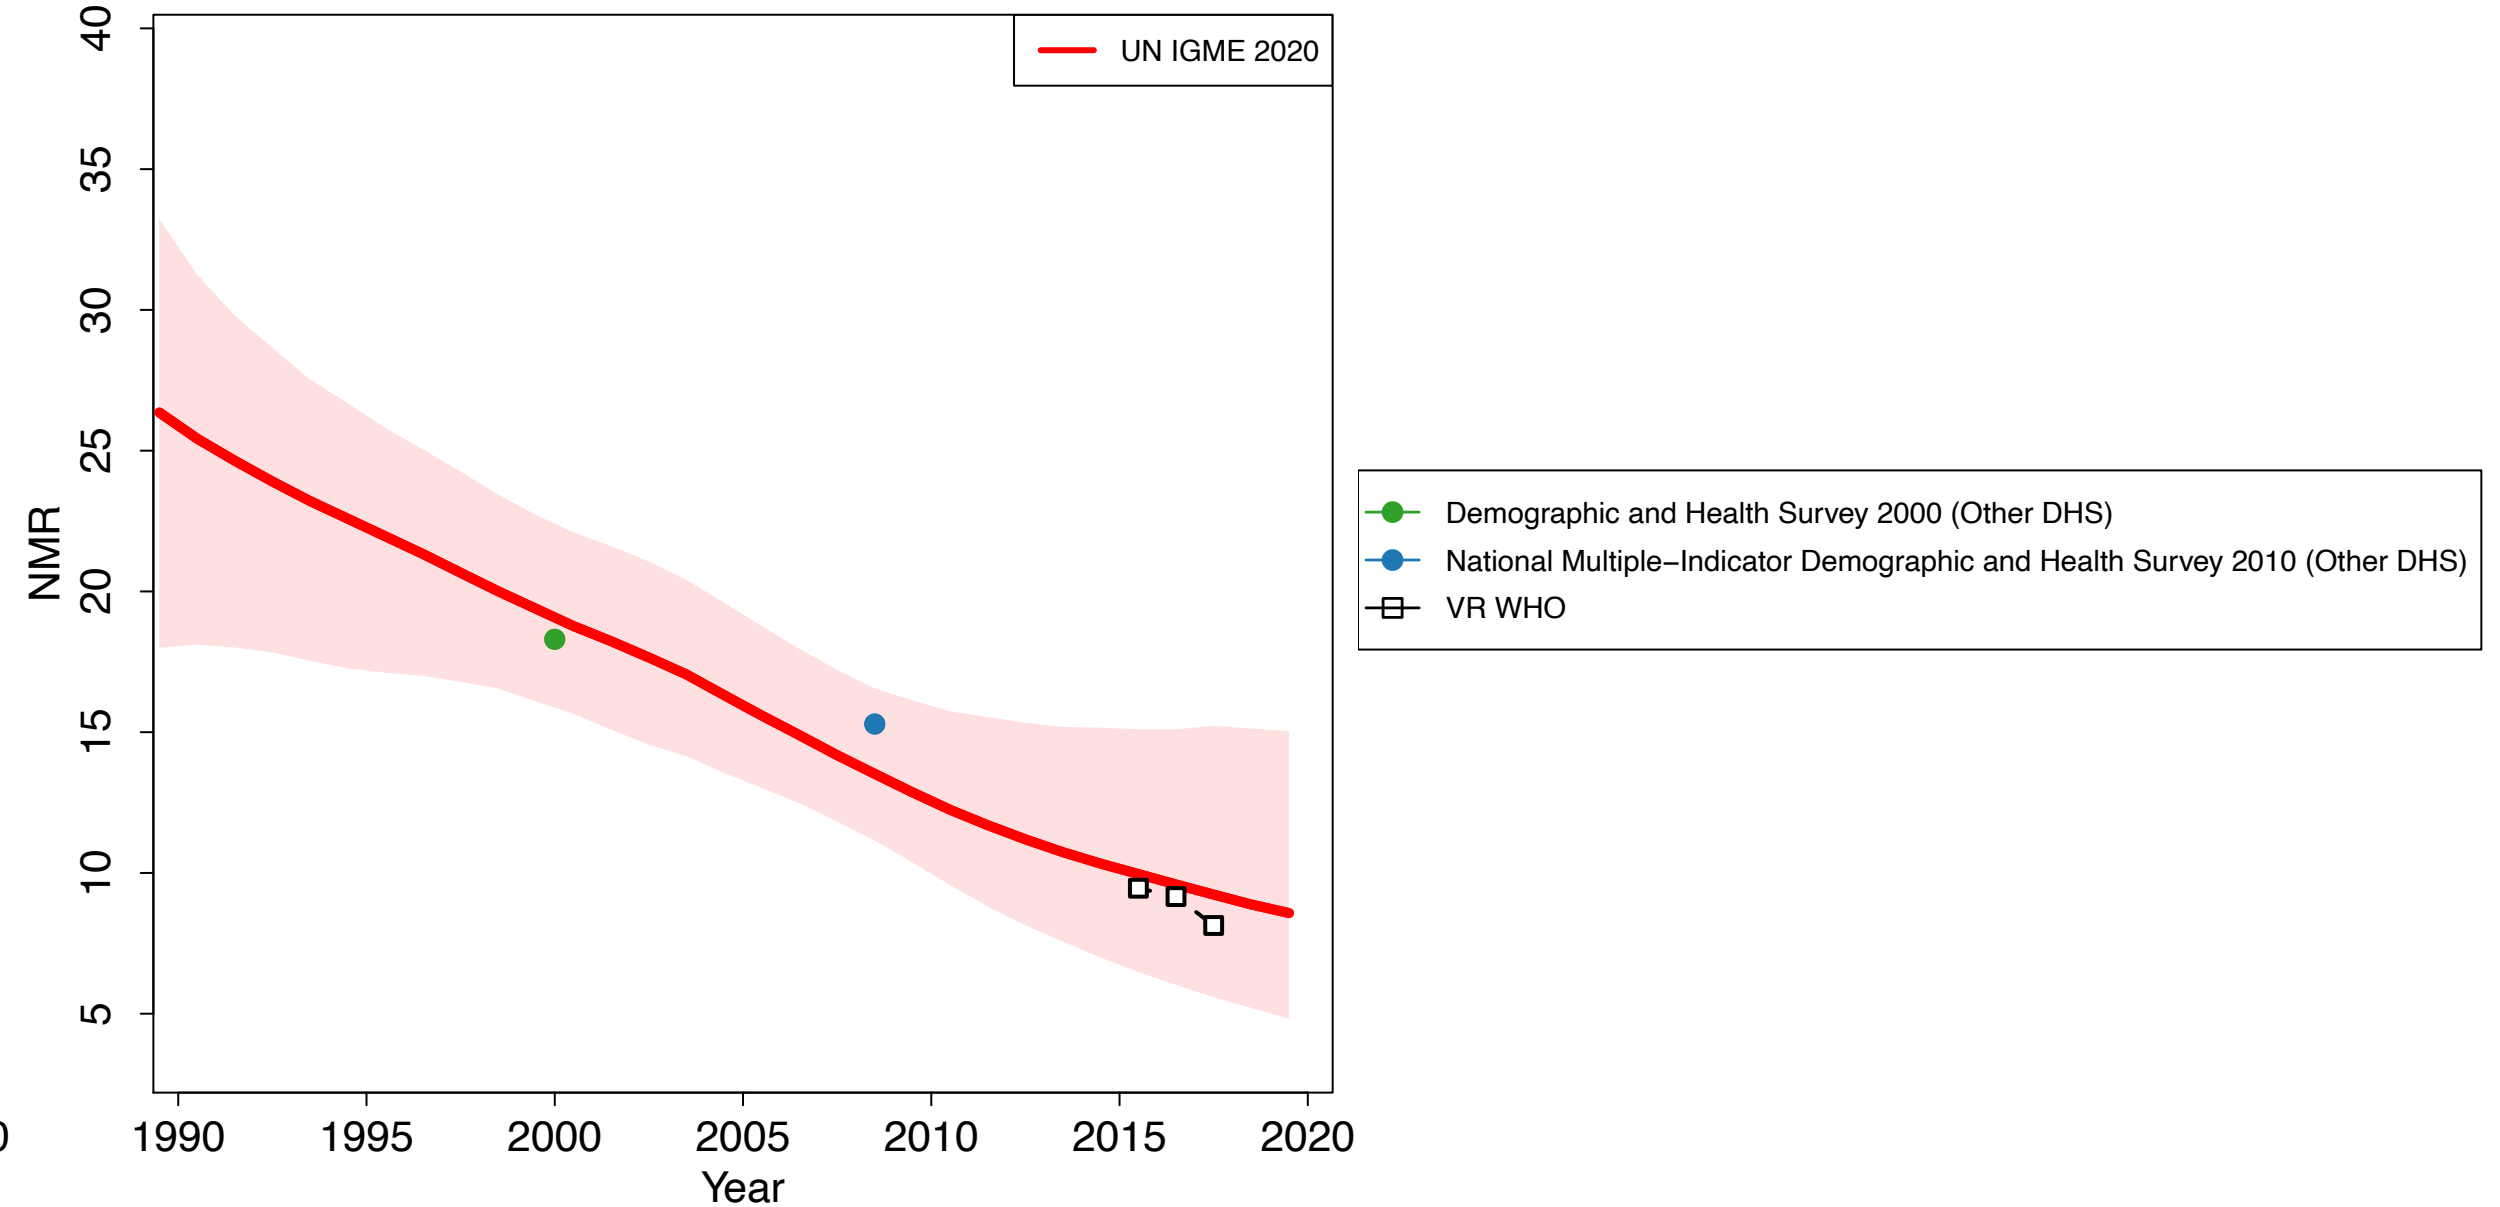

# Iraq

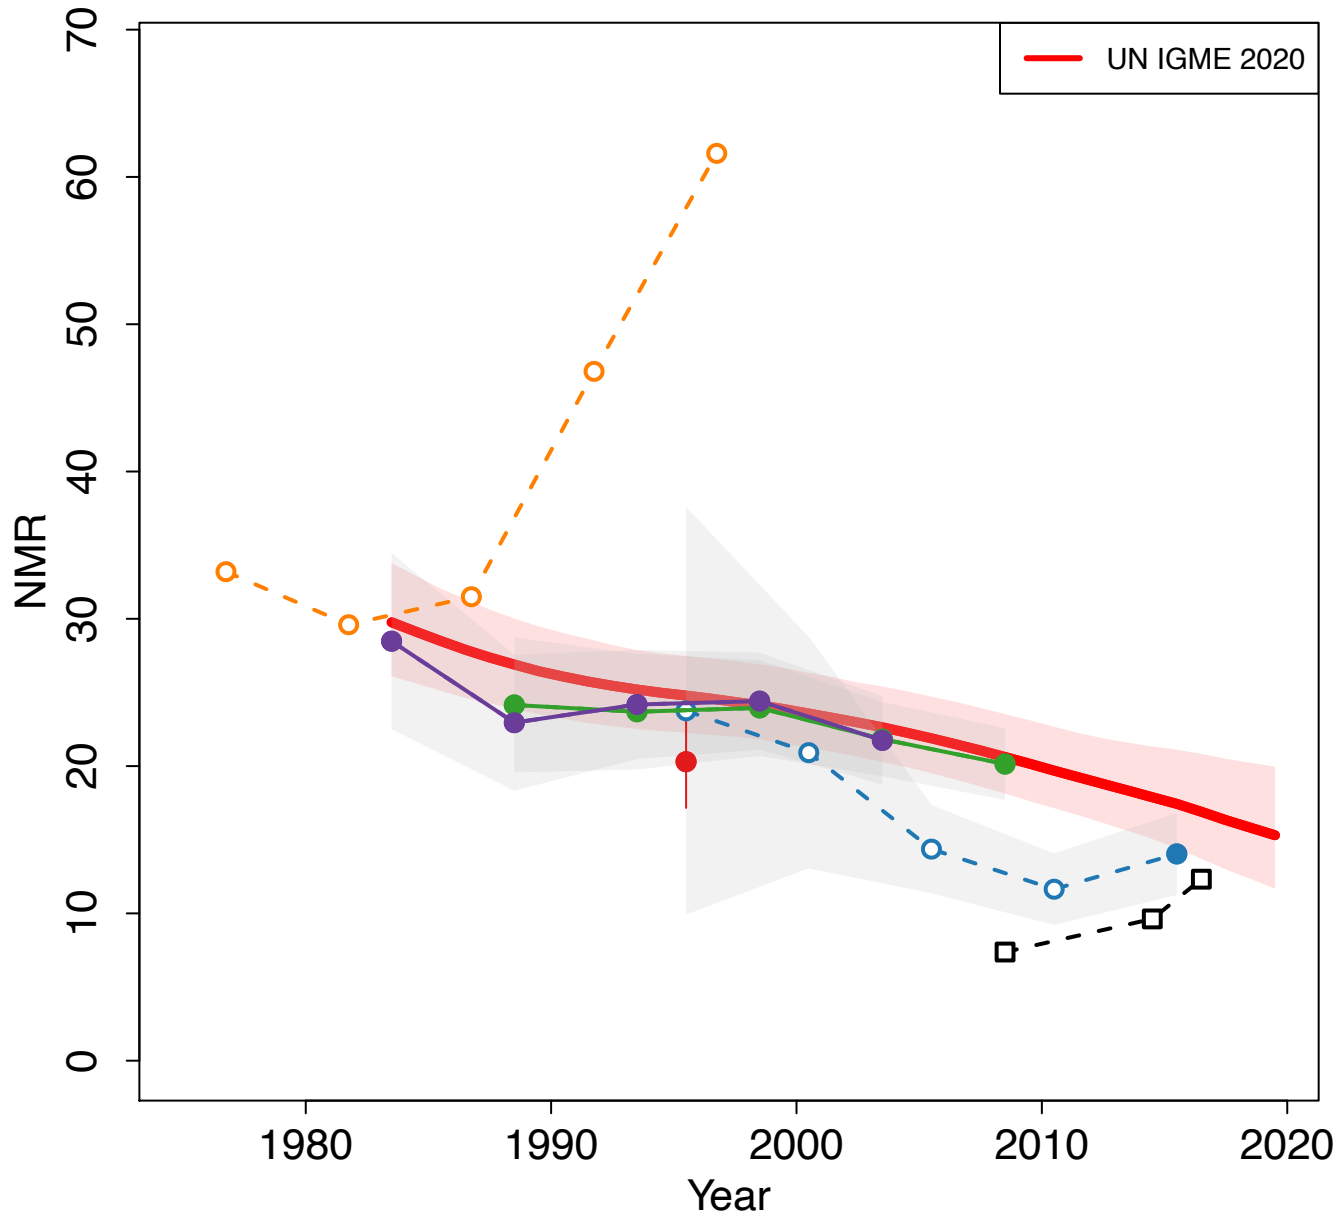

# Zoomed in

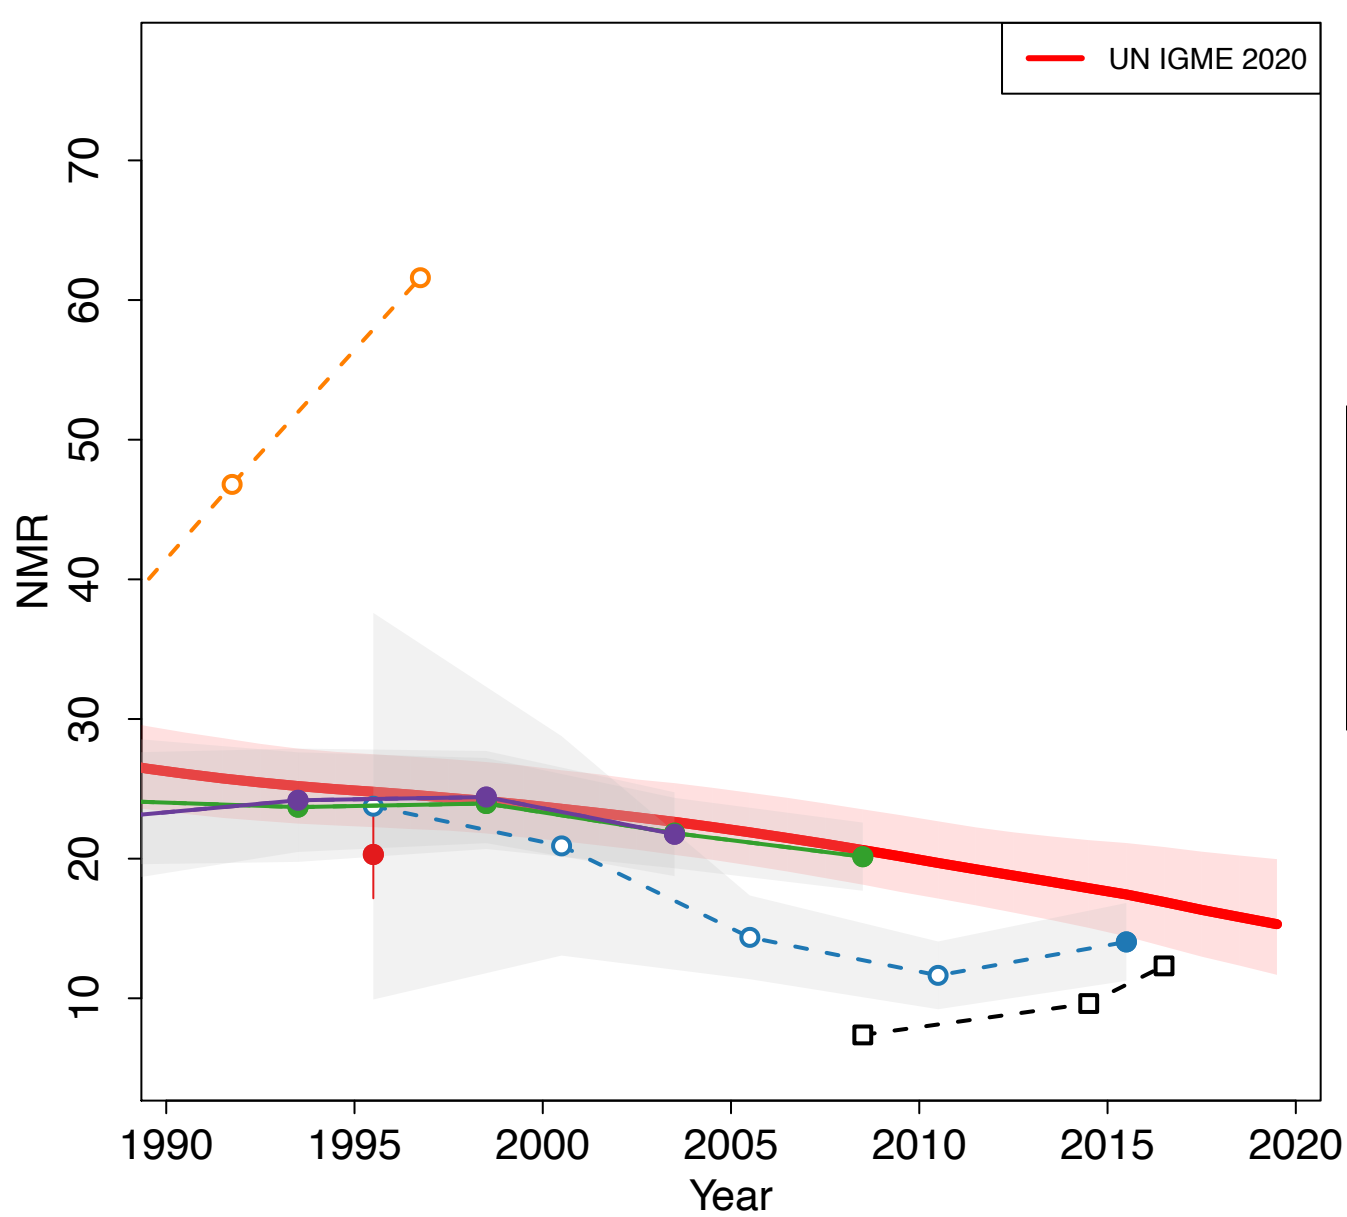

- Child and Maternal Mortality Survey 1999 (Others)
- Living Conditions Survey 2004 (Others)
- Multiple Indicator Cluster Survey 2006 (MICS)
- Multiple Indicator Cluster Survey 2011 (MICS)
- Multiple Indicator Cluster Survey 2018 (MICS)
- VR WHO

# Ireland

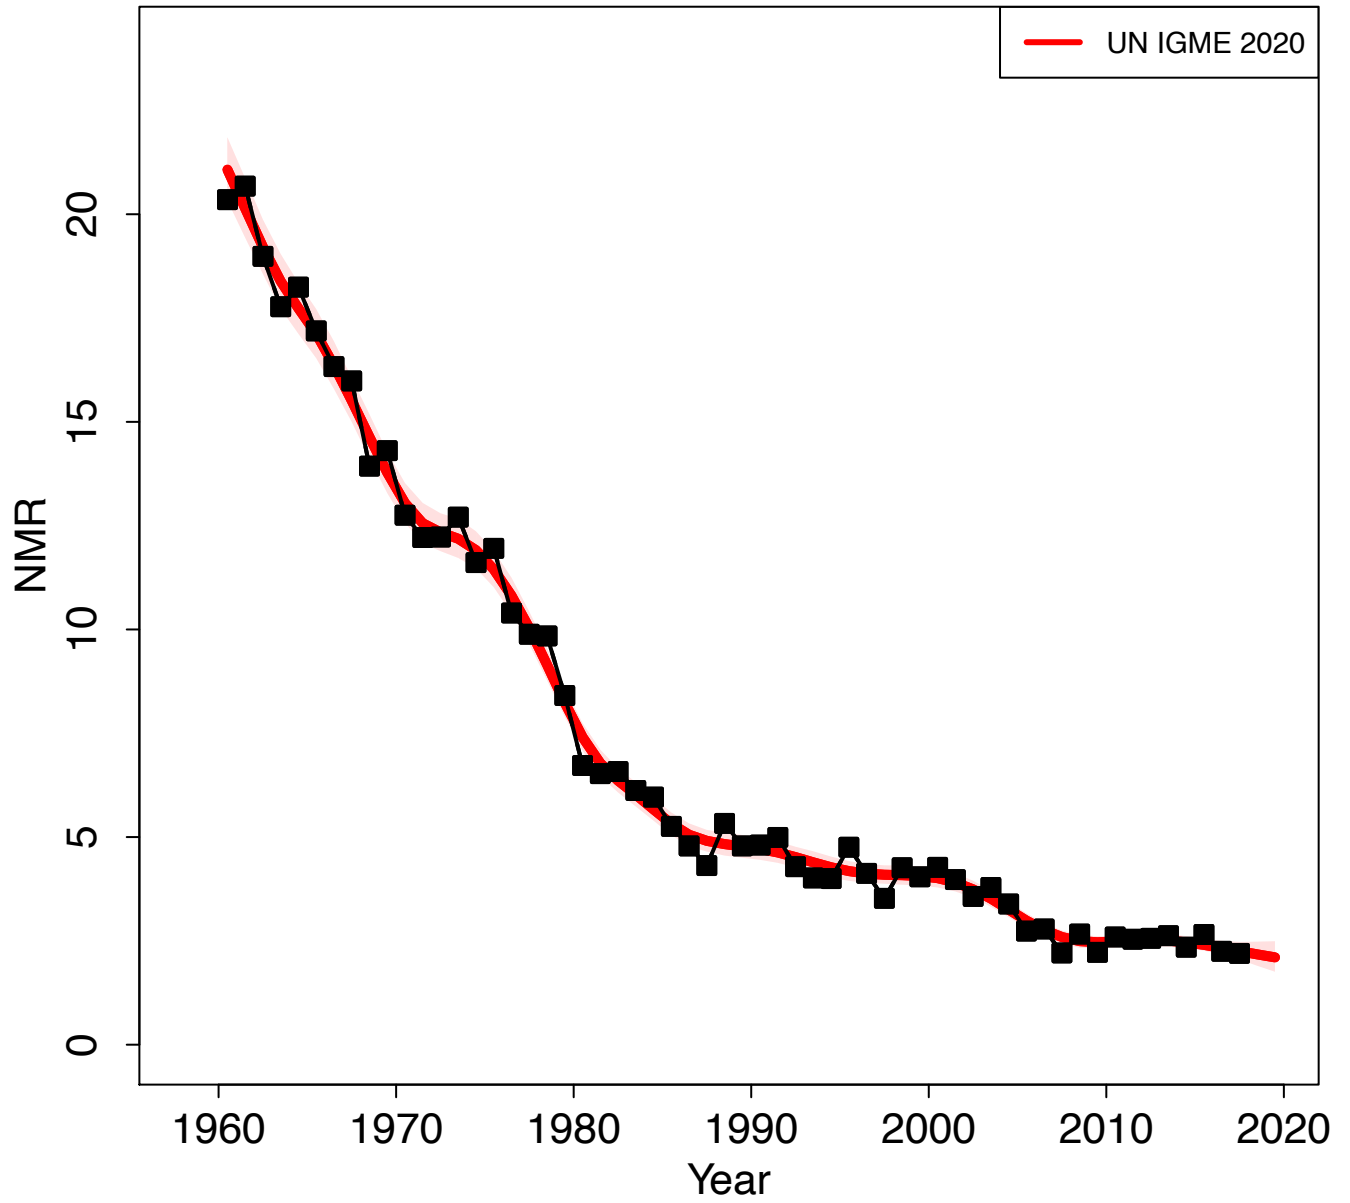

# Zoomed in

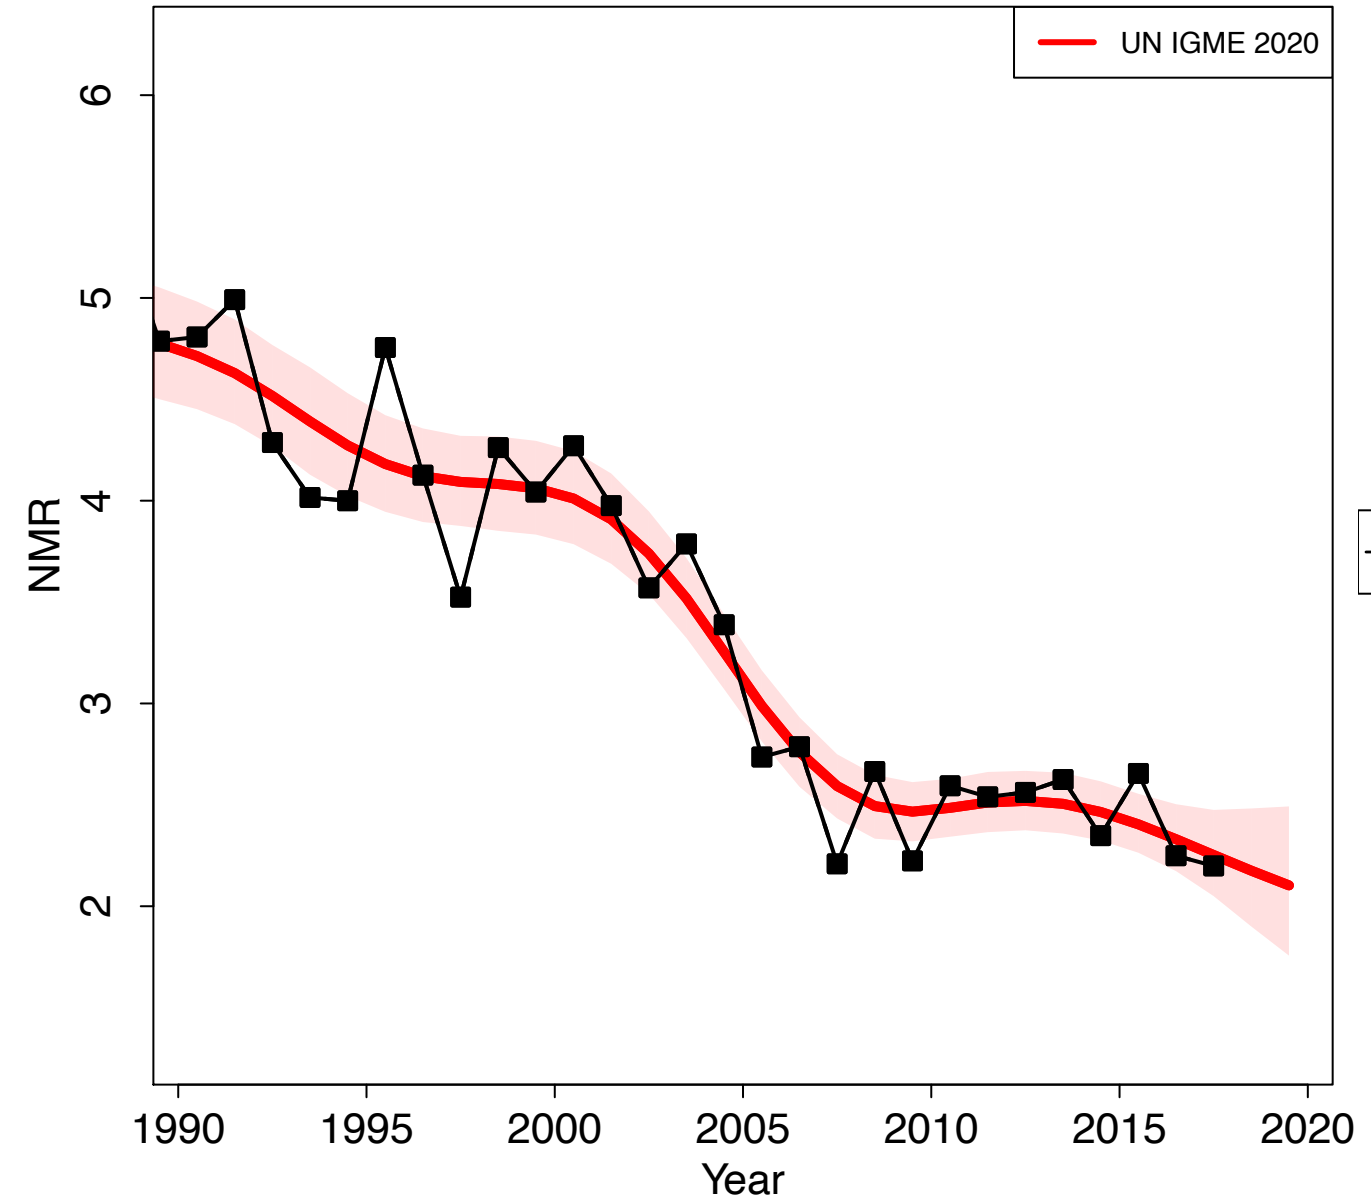

# Israel

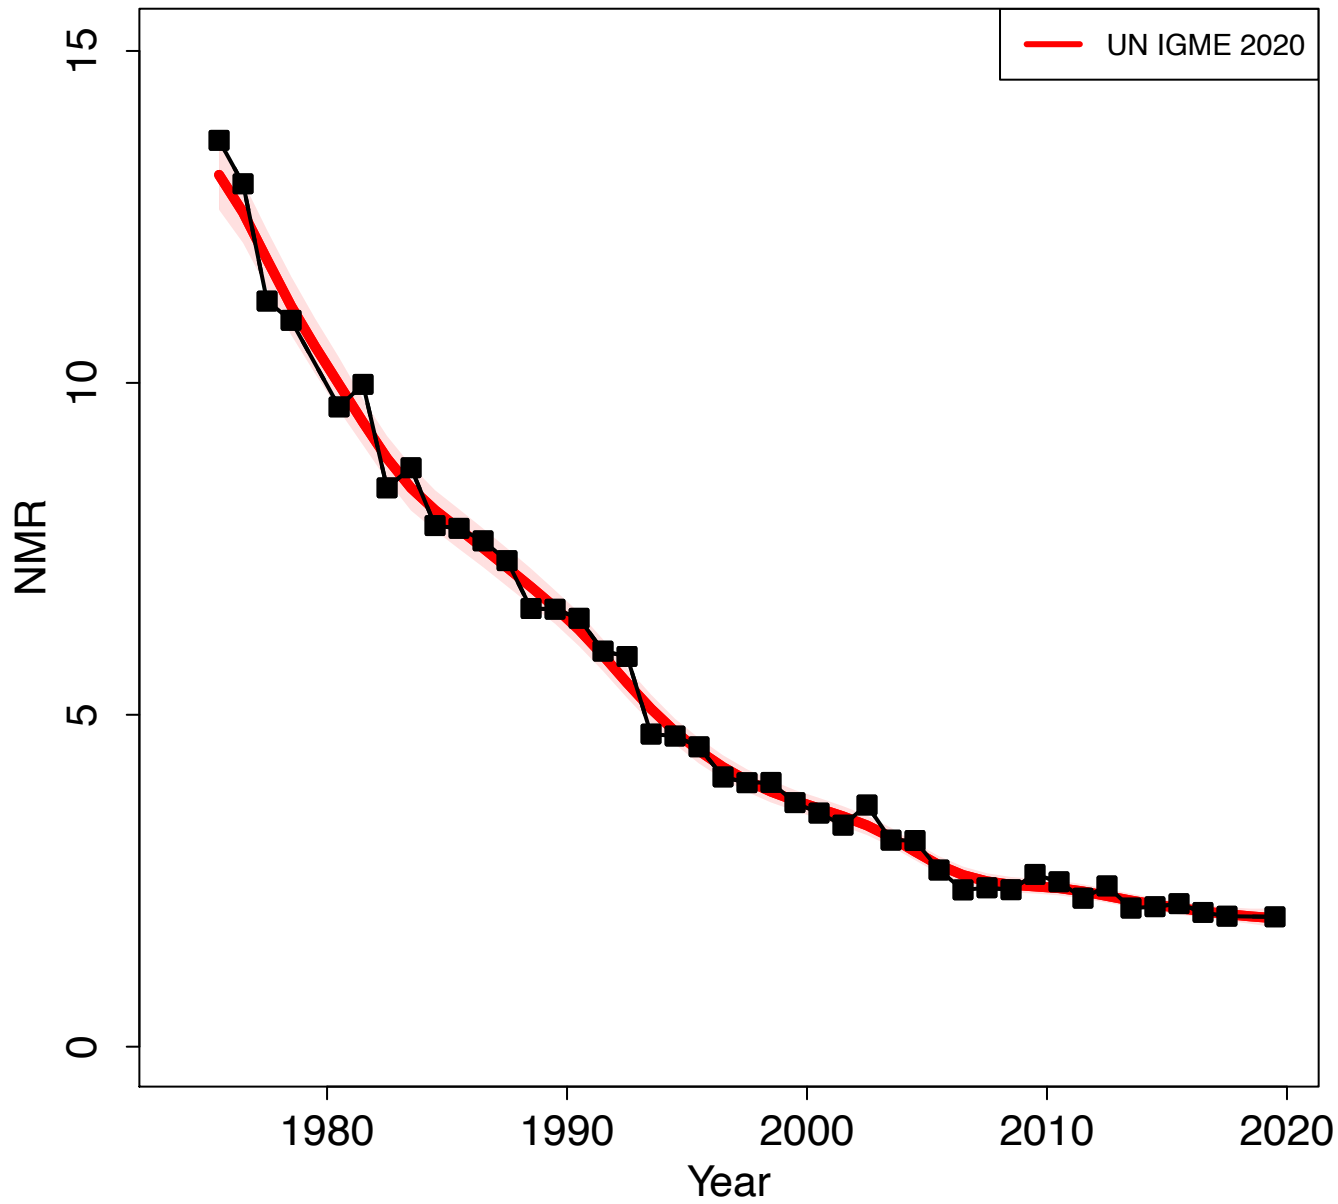

# Zoomed in

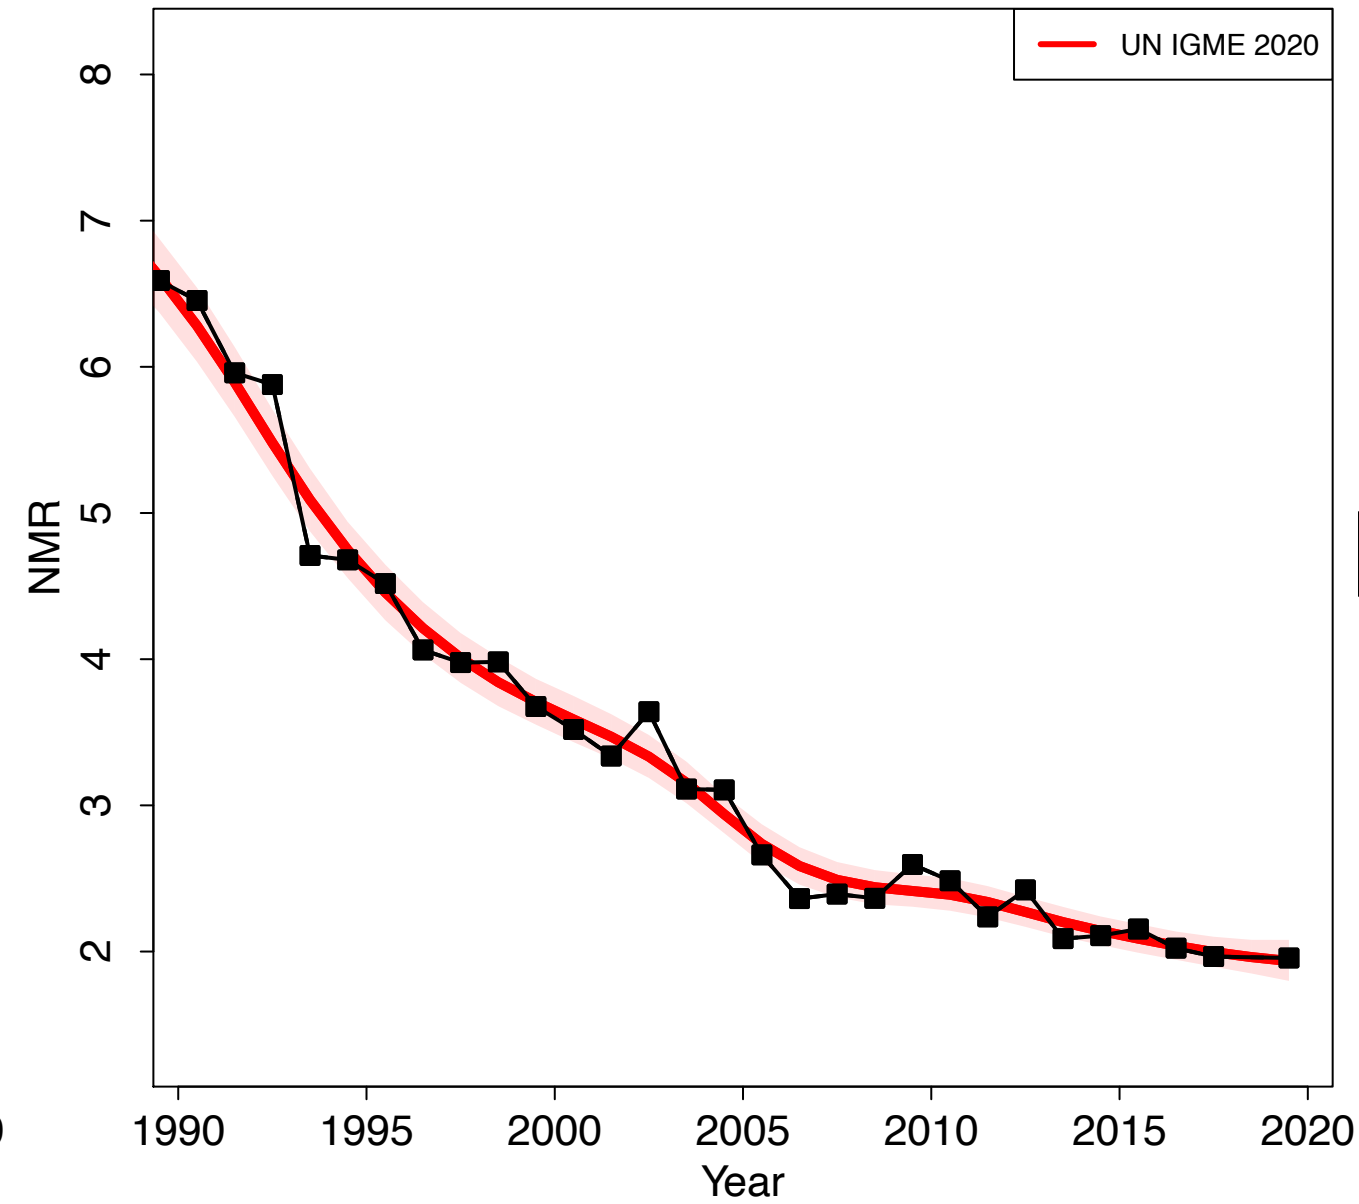



# Italy

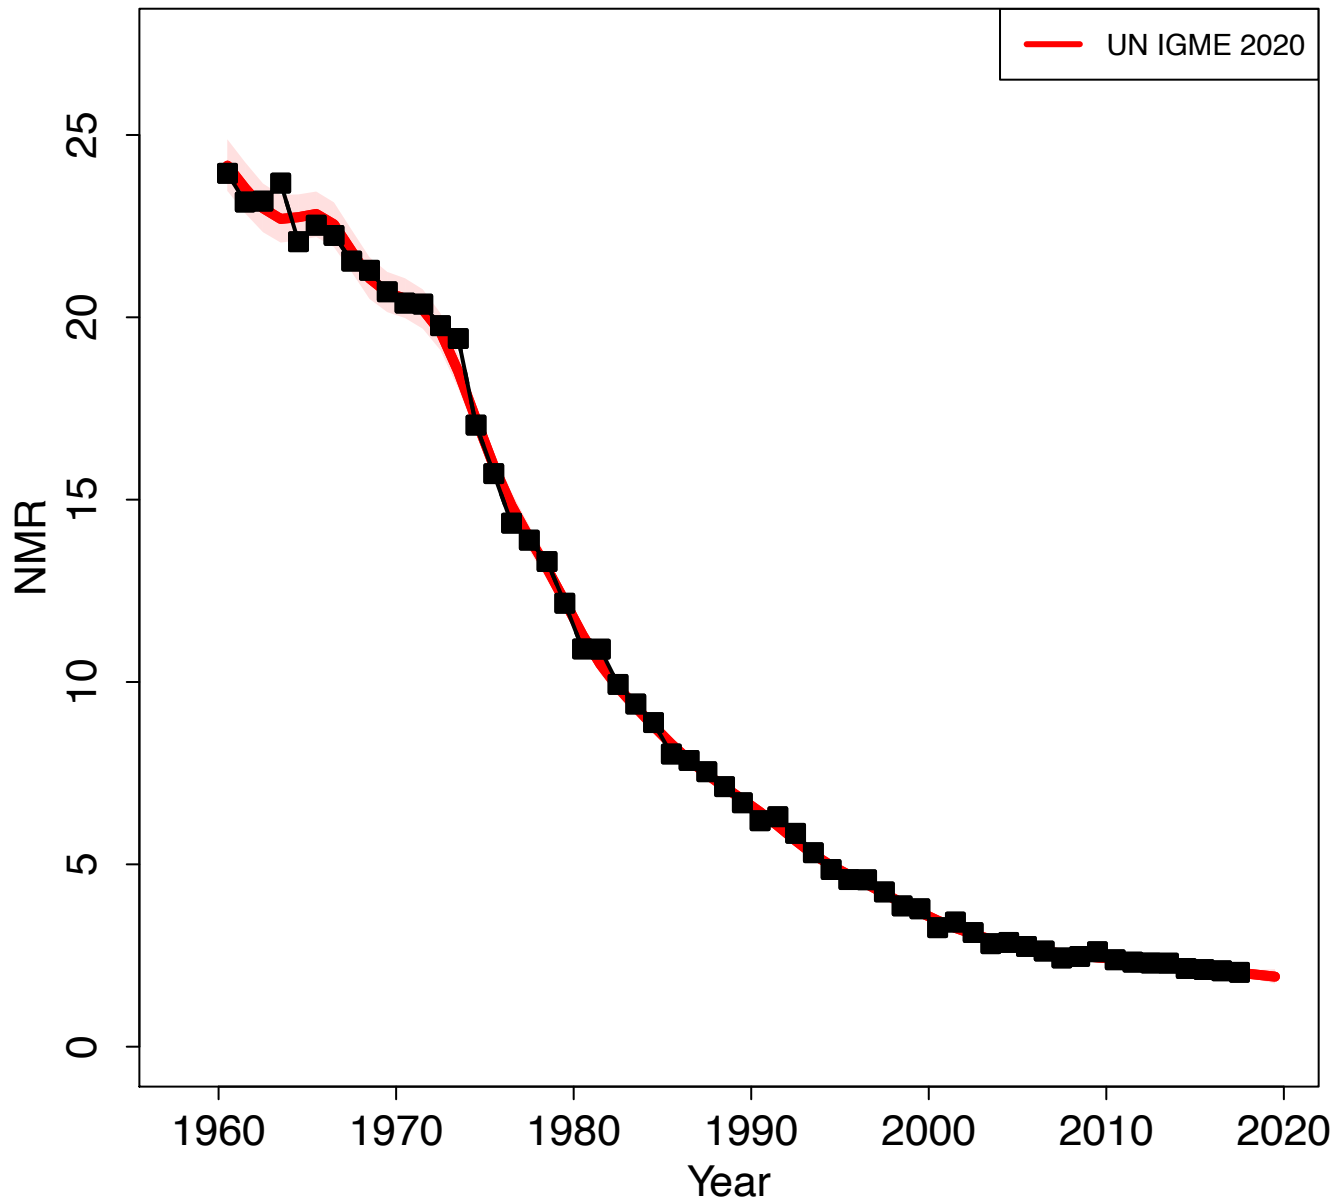

# Zoomed in

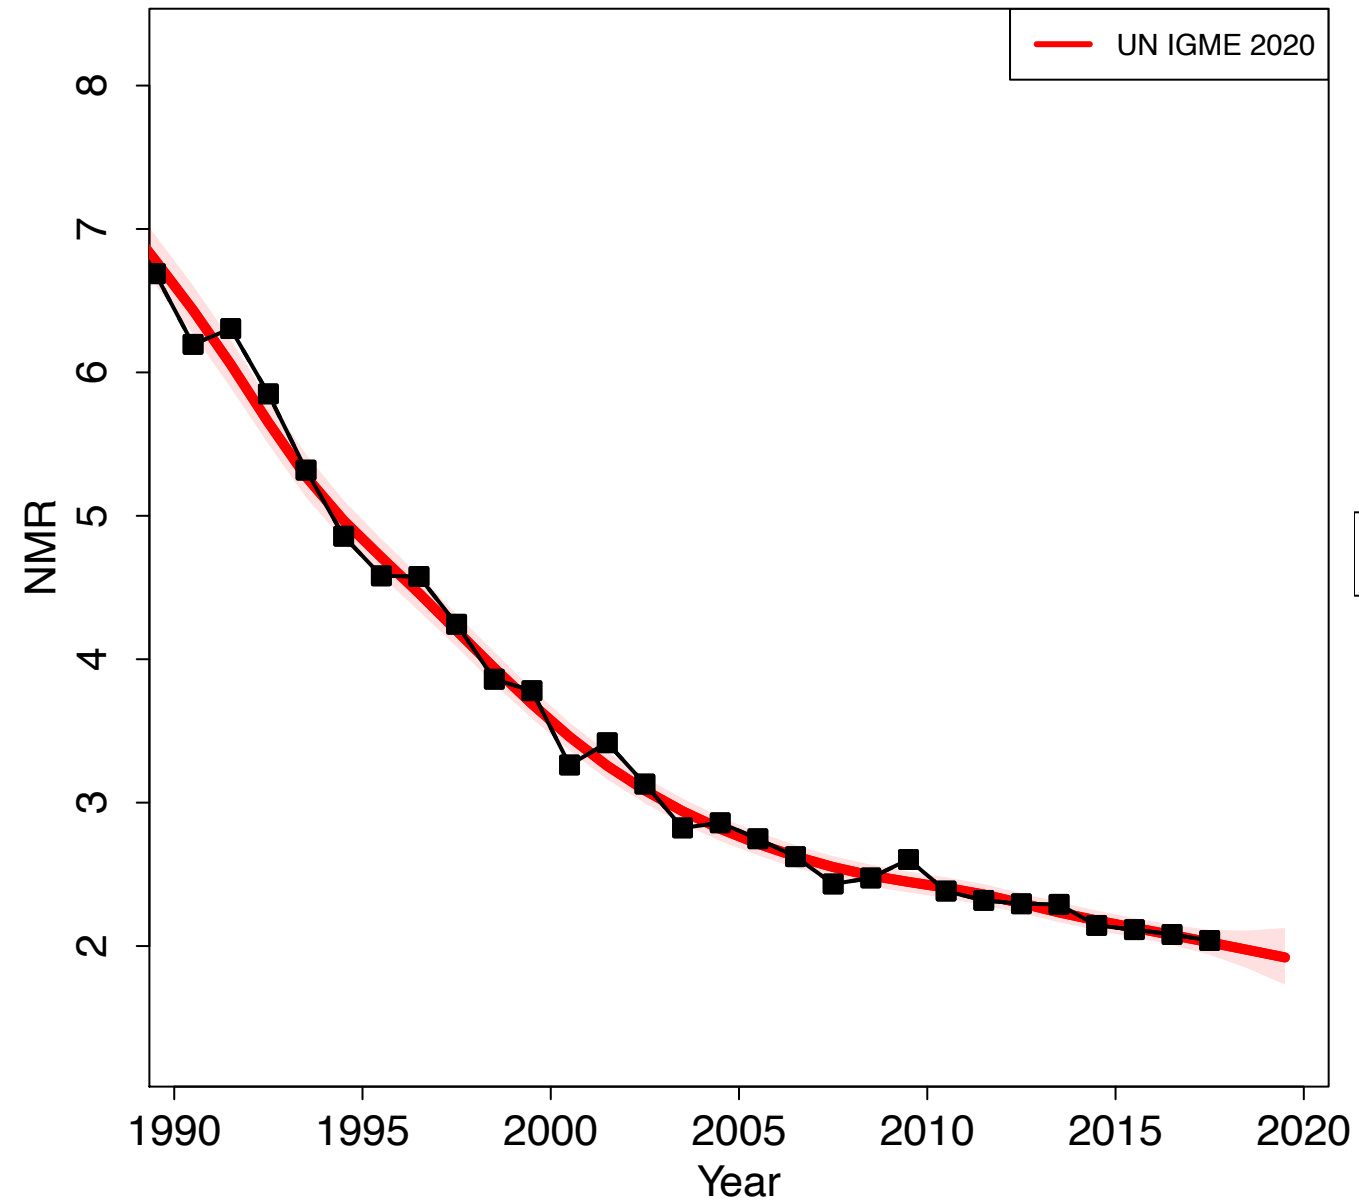

# Jamaica

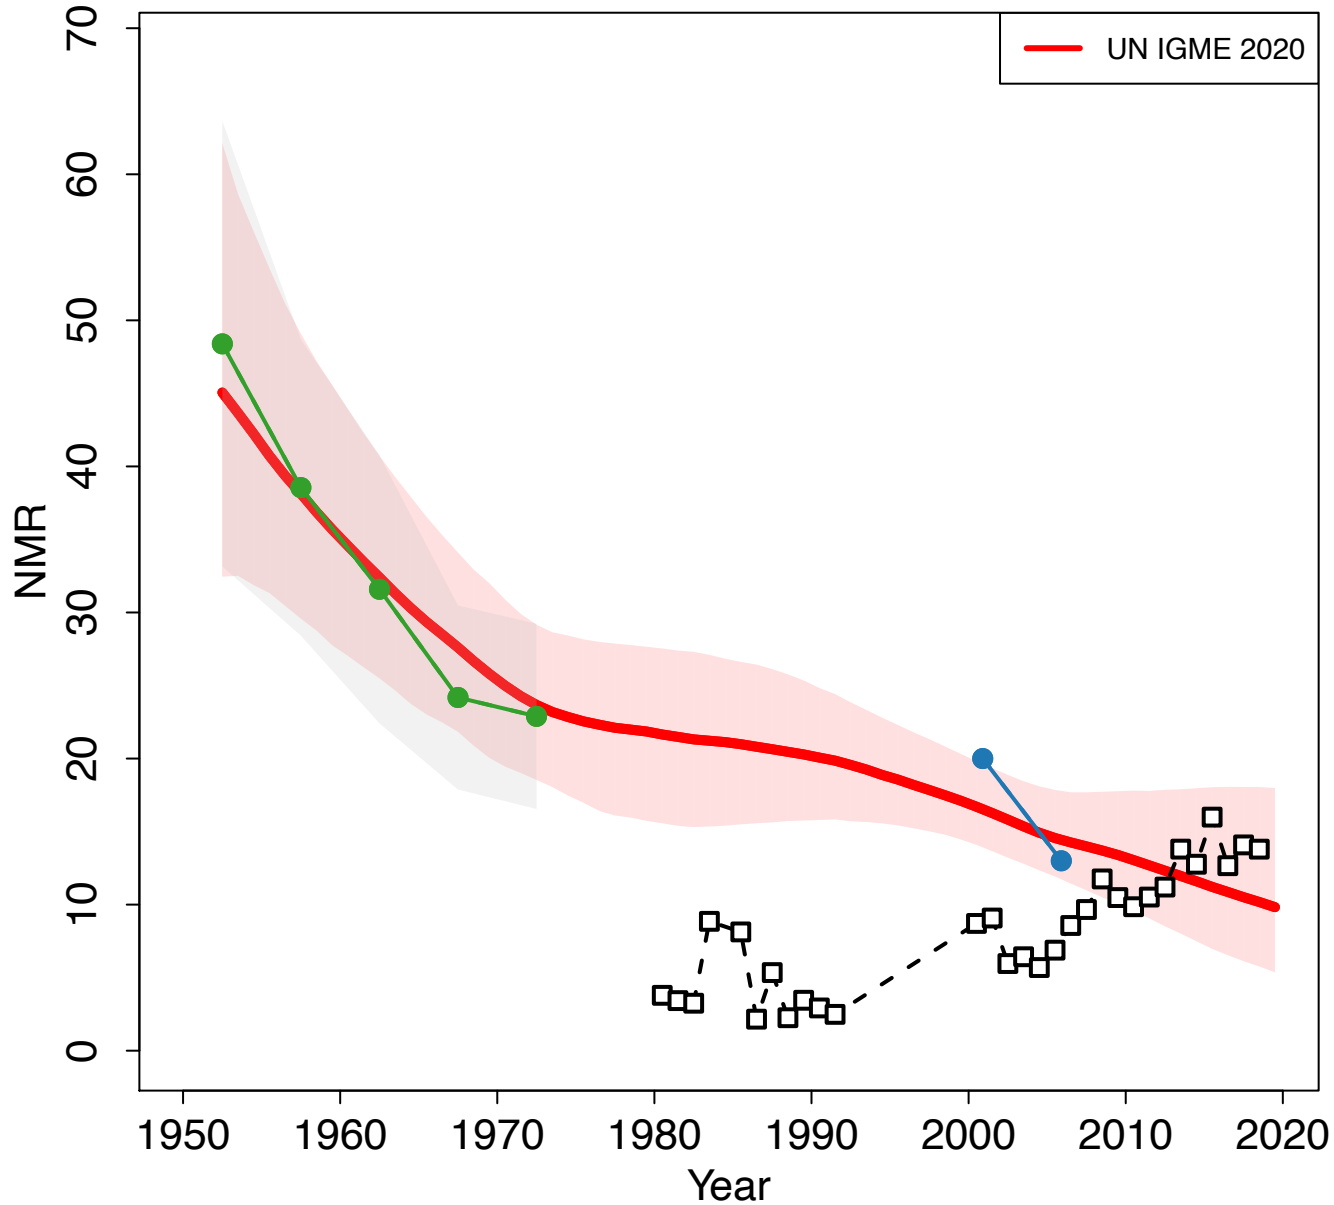

# Zoomed in

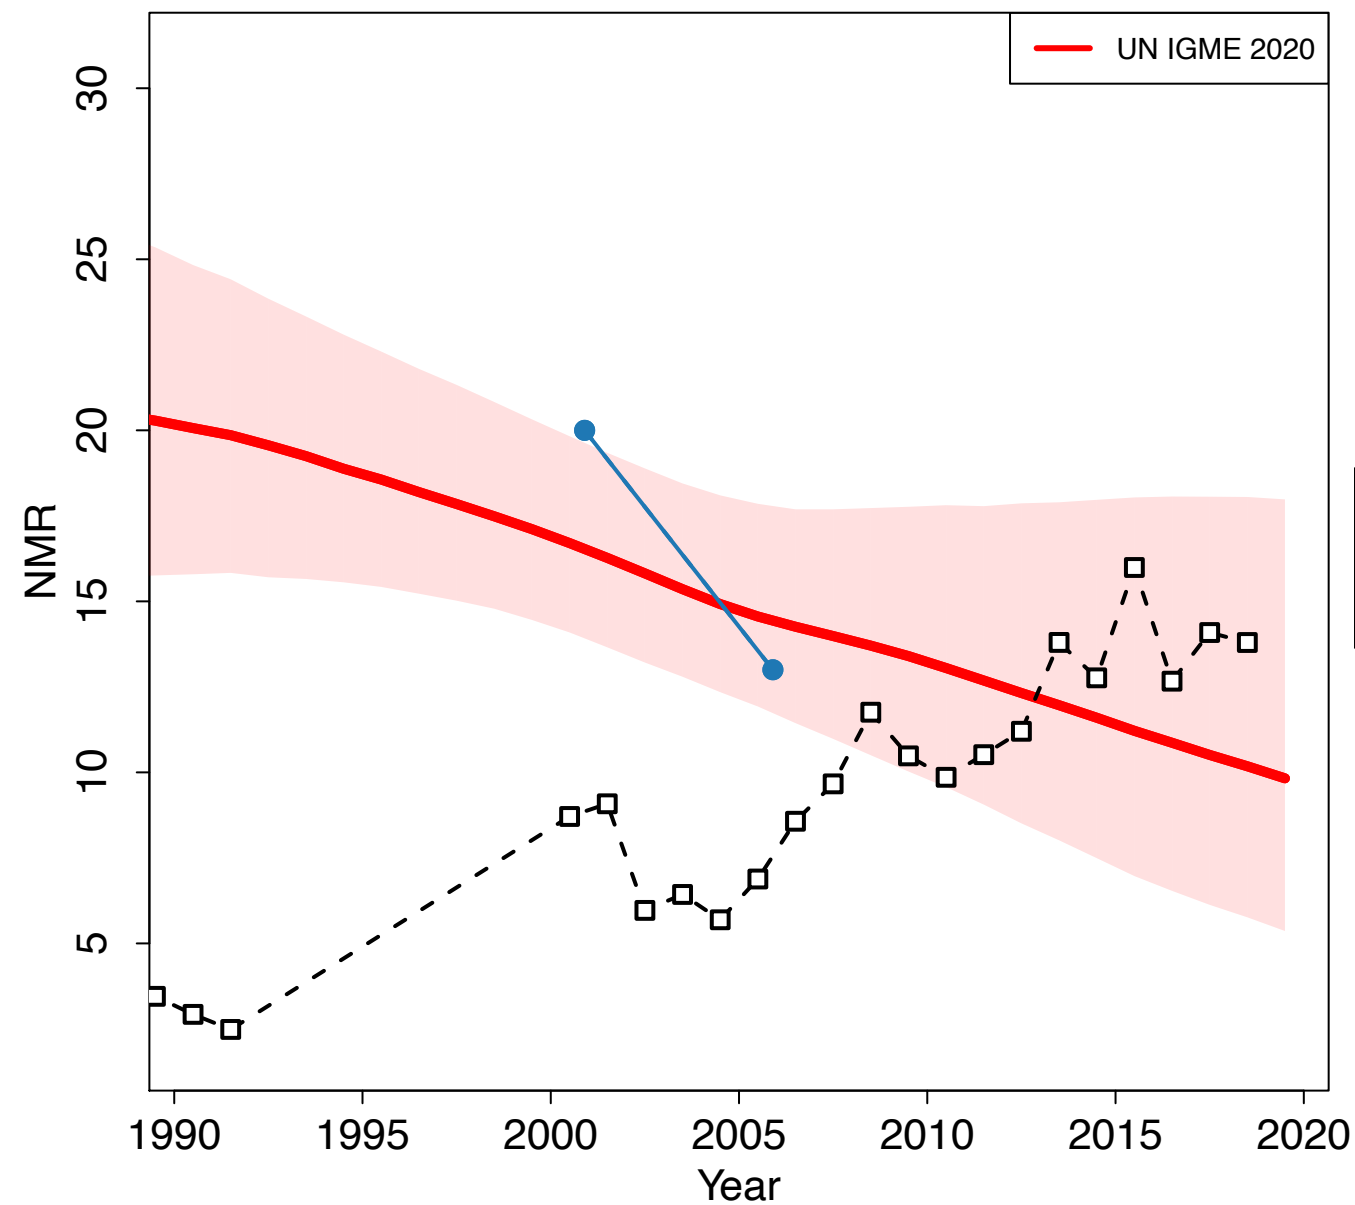

# Japan

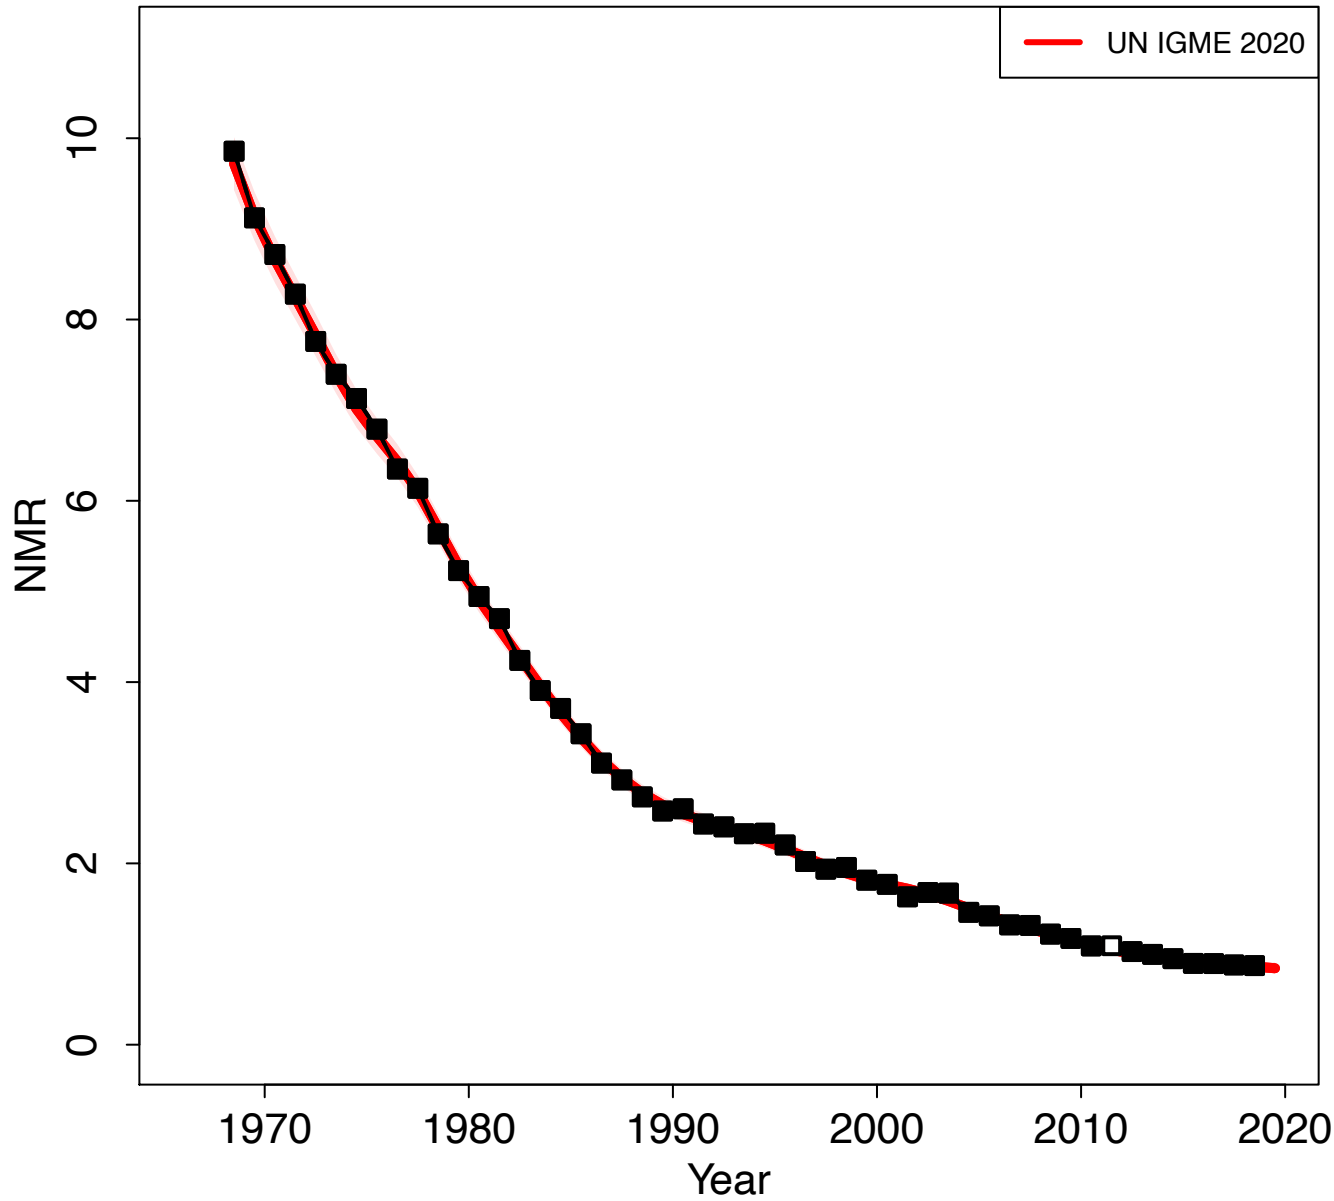

# Zoomed in

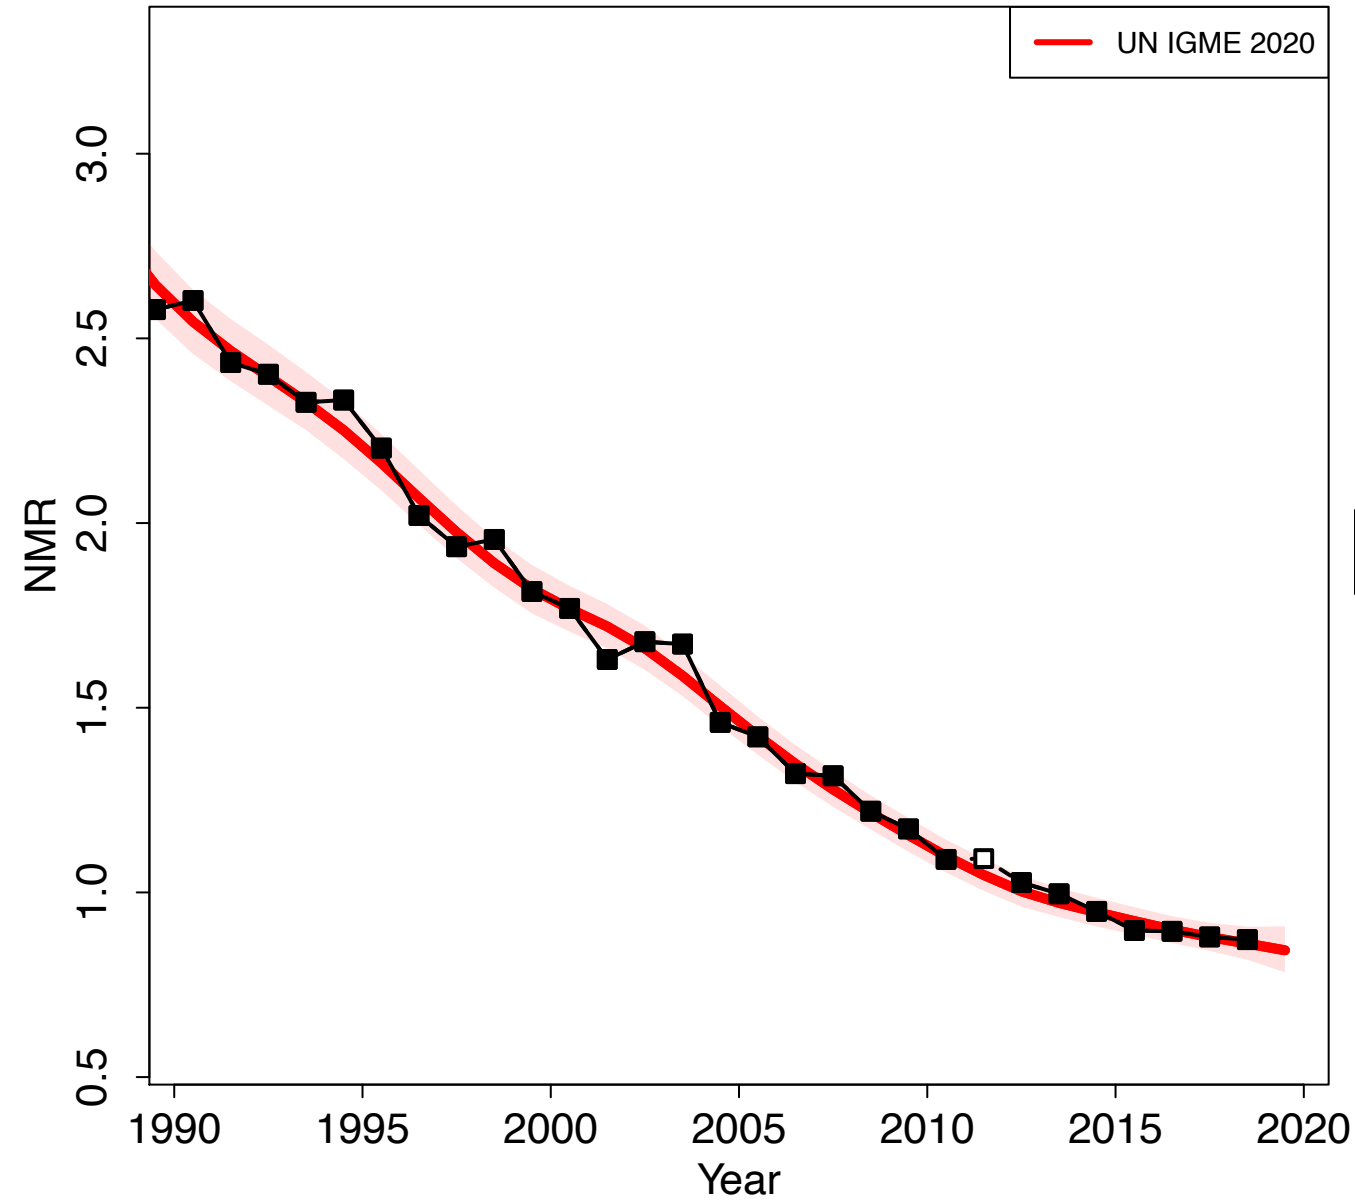



# Kazakhstan

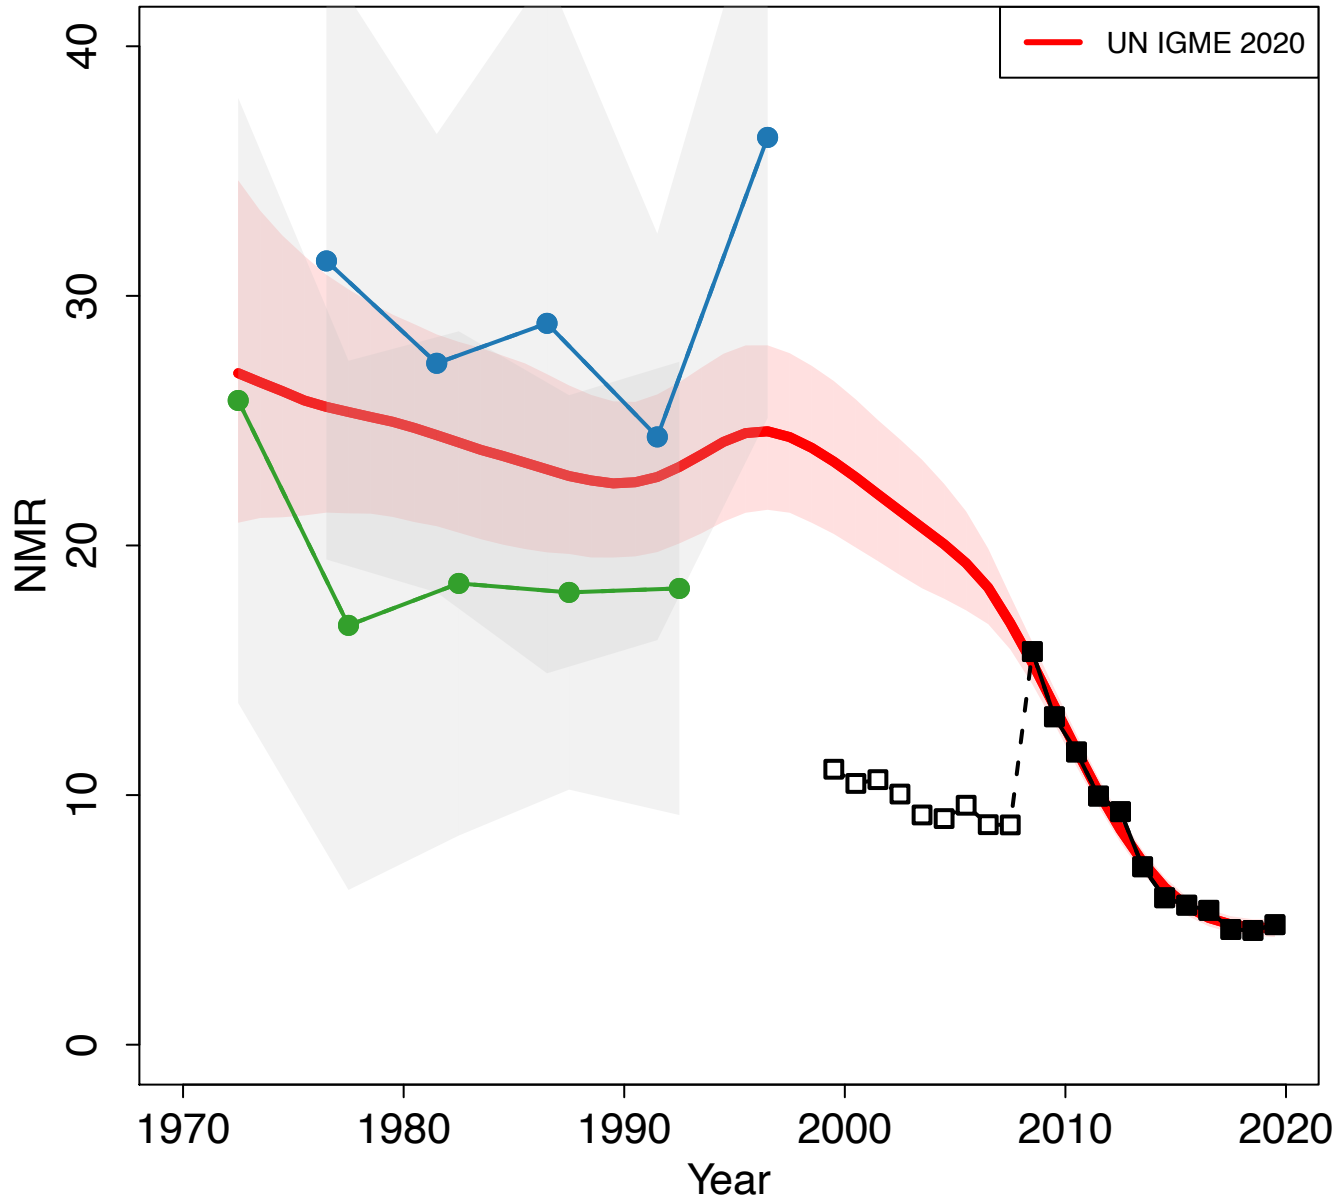

# Zoomed in

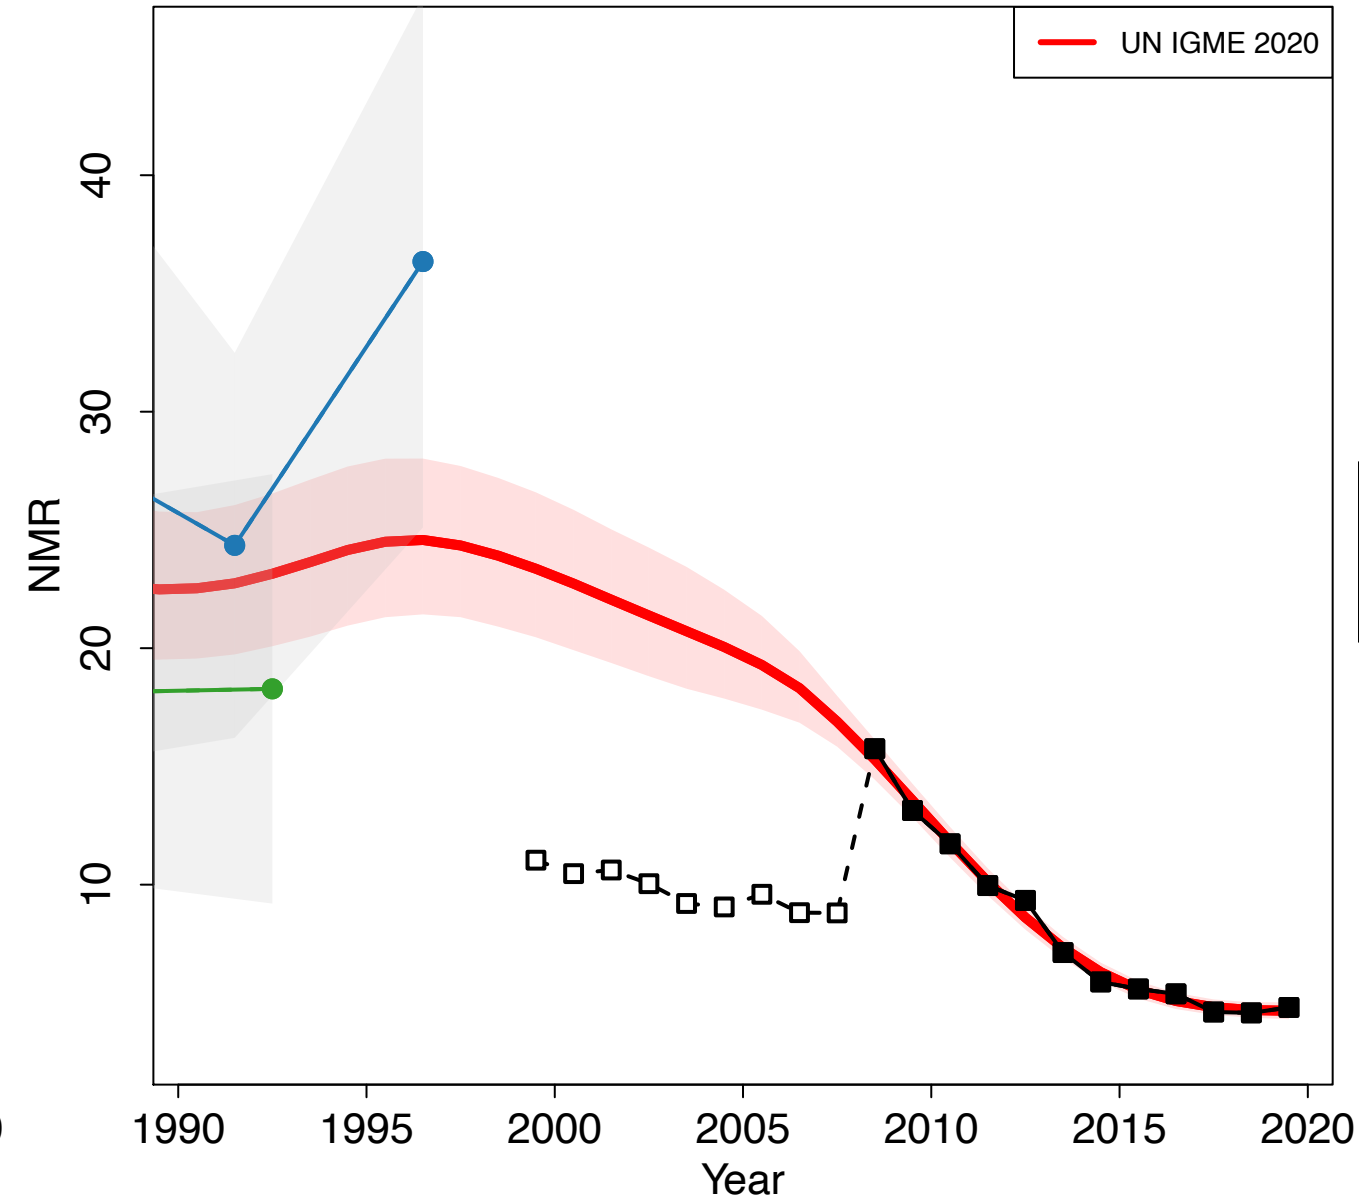

# Kenya

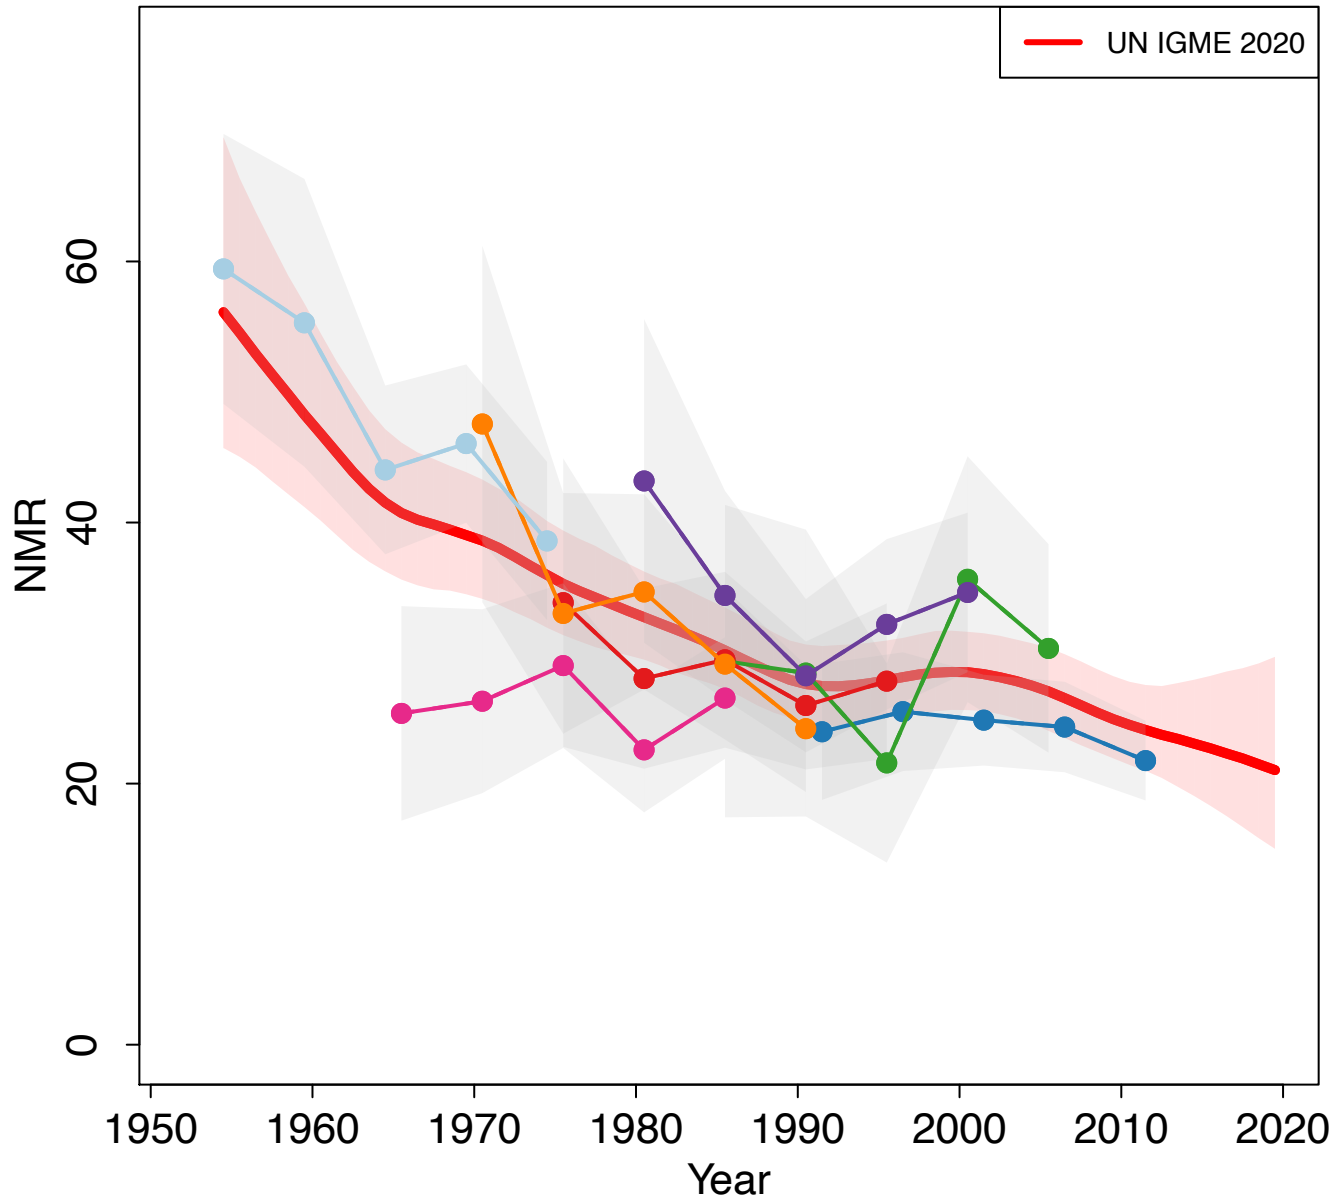

# Zoomed in

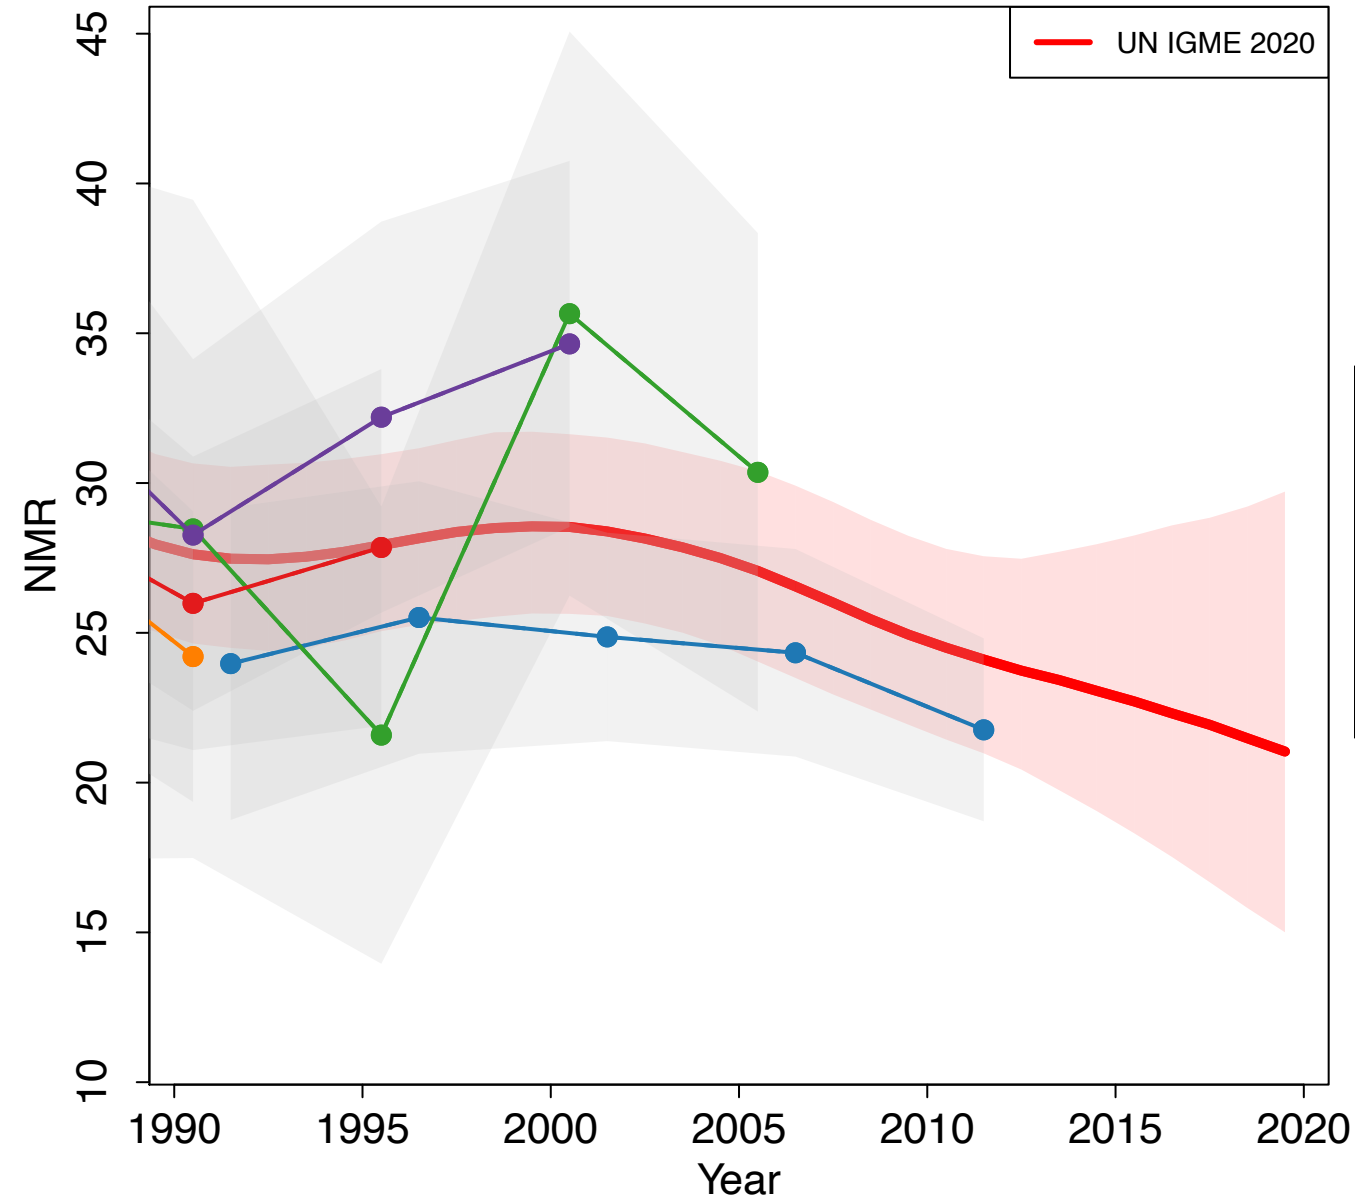

- World Fertility Survey 1977–1978 (Other DHS)
- Demographic and Health Survey 1989 (DHS)
- Demographic and Health Survey 1993 (DHS)
- Demographic and Health Survey 1998 (DHS)
- Demographic and Health Survey 2003 (DHS)
- Demographic and Health Survey 2008–2009 (DHS)
- Demographic and Health Survey 2014 (DHS)

# Kiribati

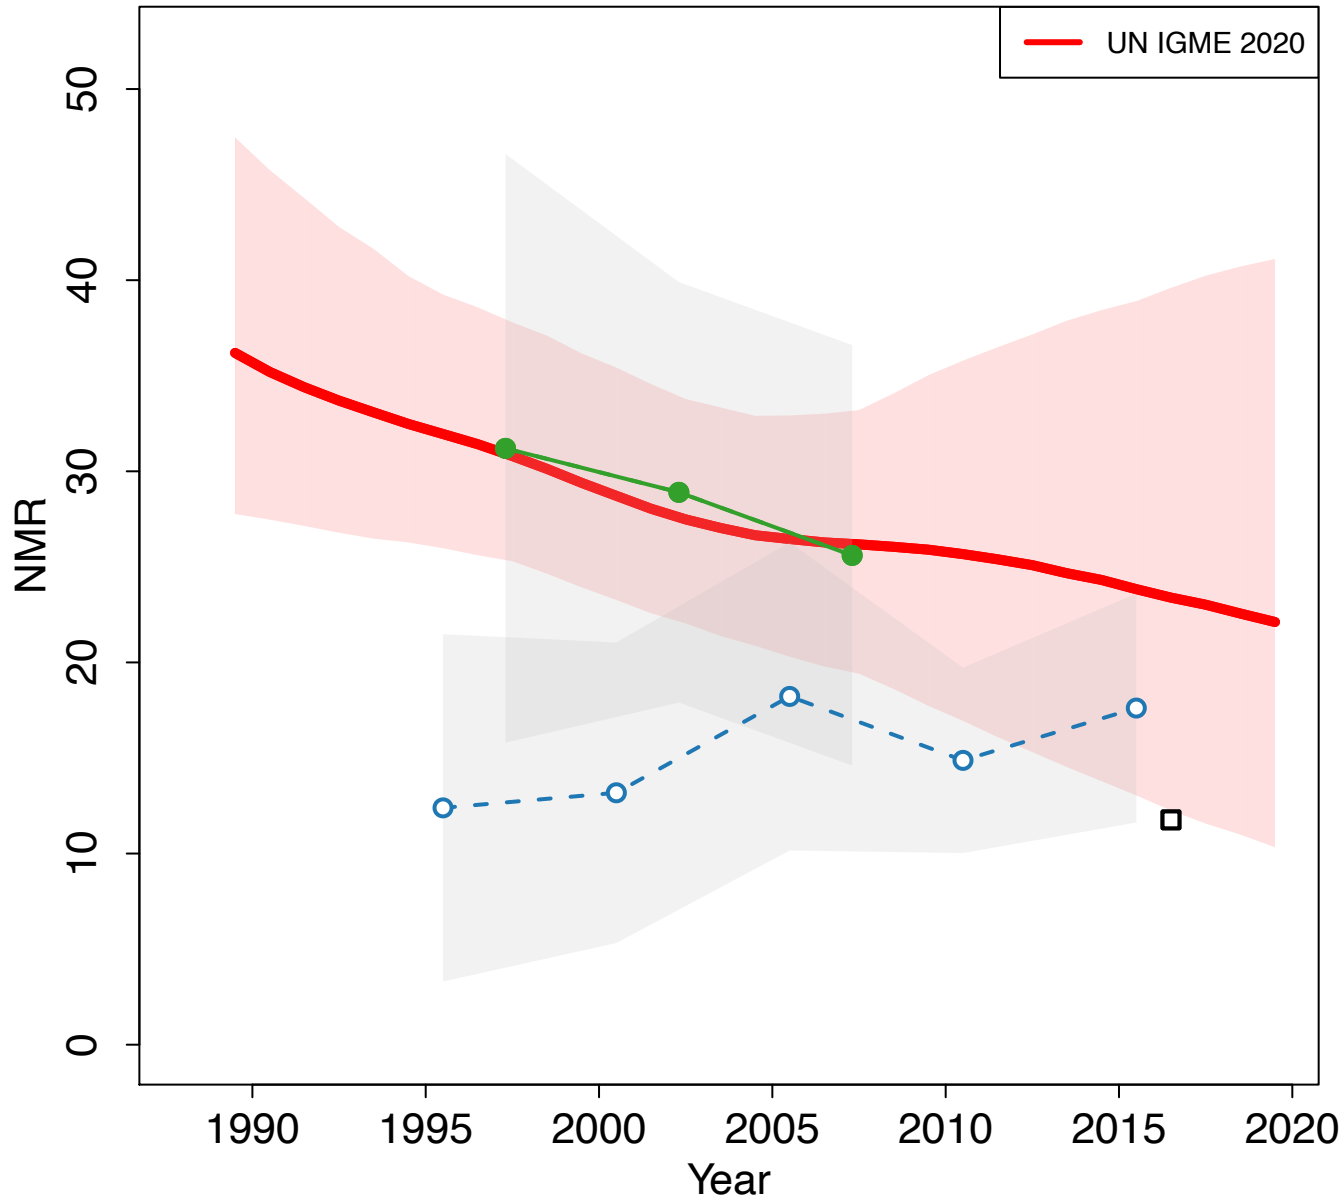

# Zoomed in

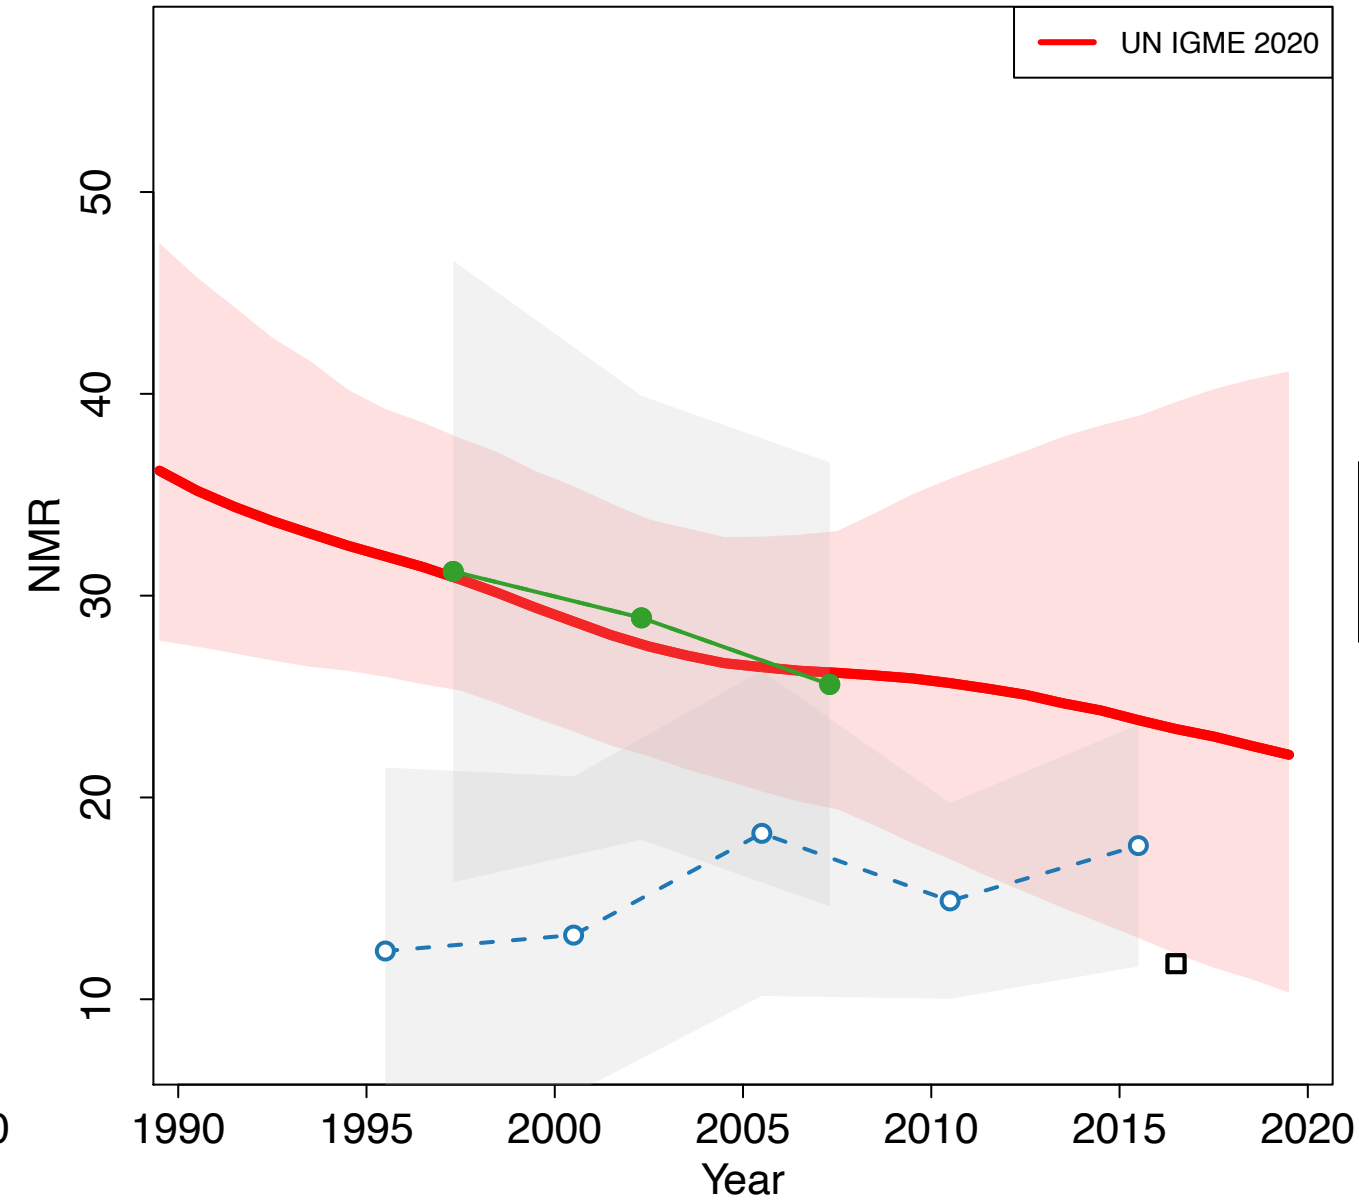

# Democratic People's Republic of Korea

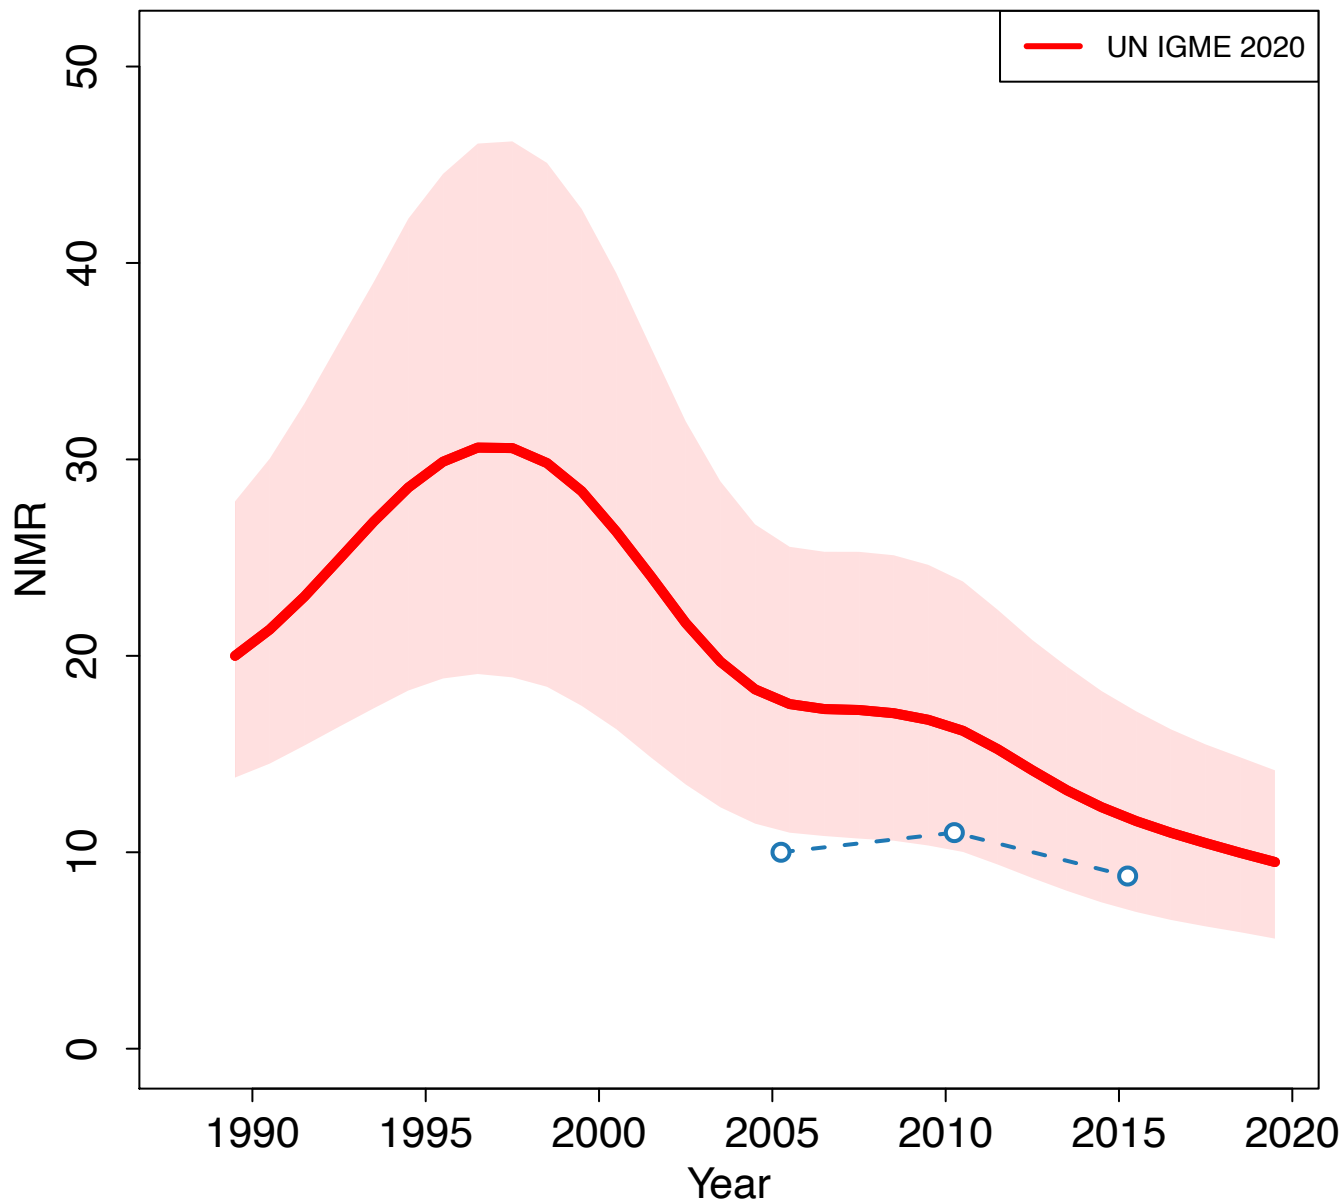

# Zoomed in

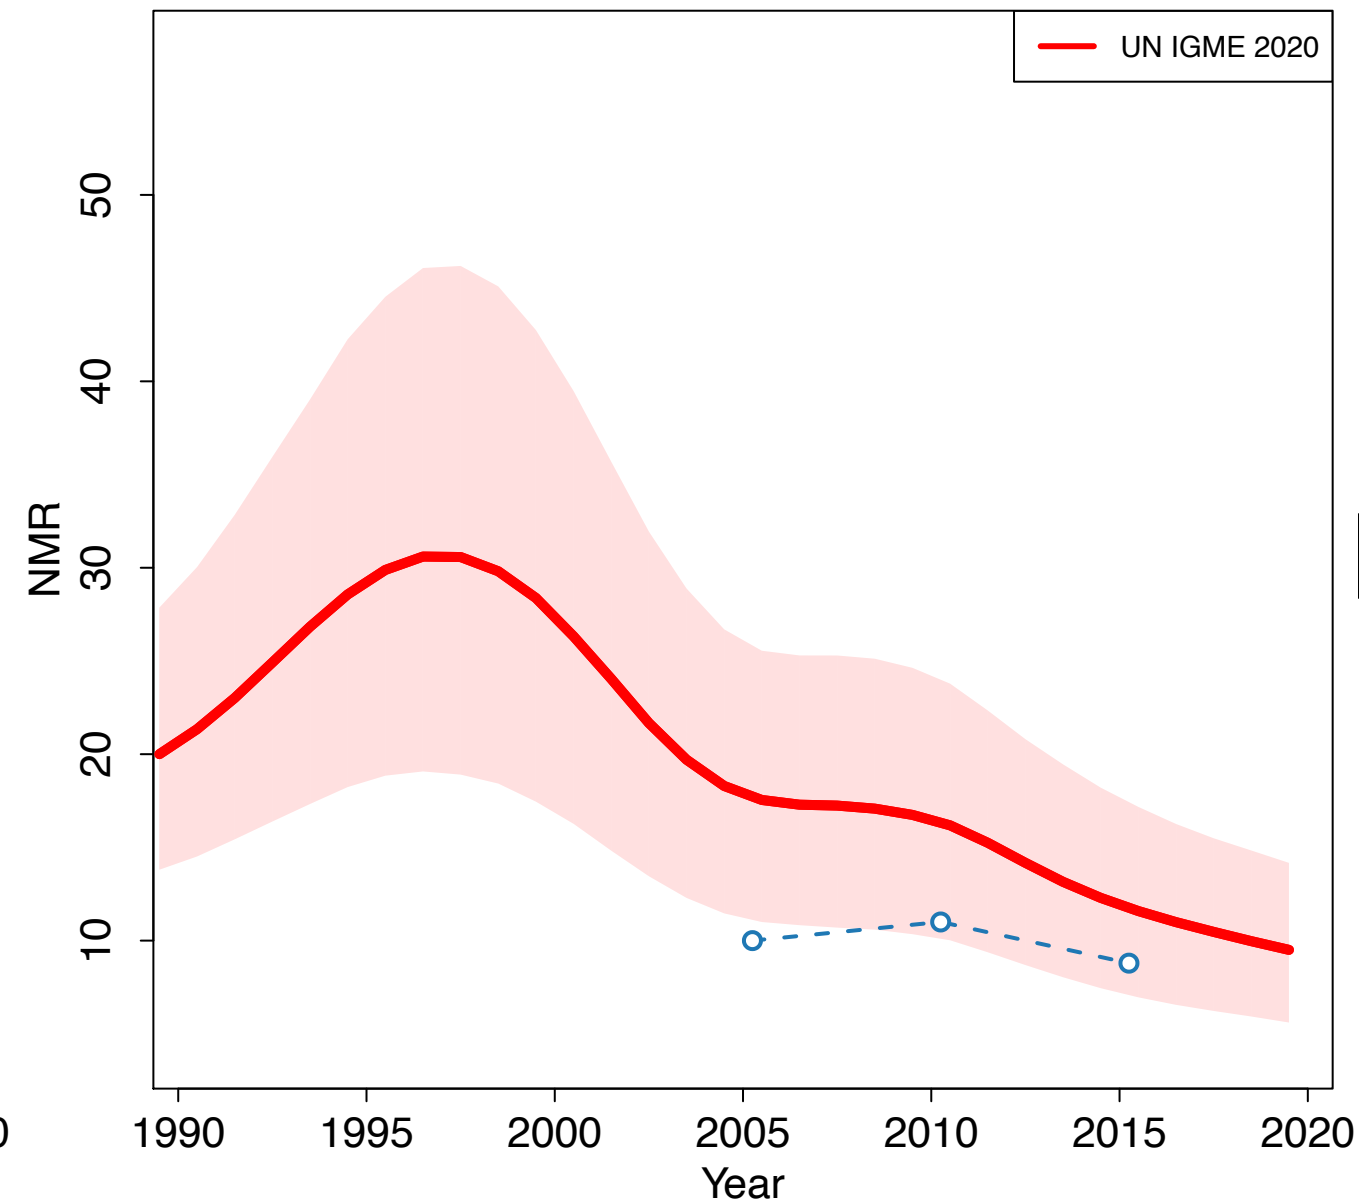



# Republic of Korea

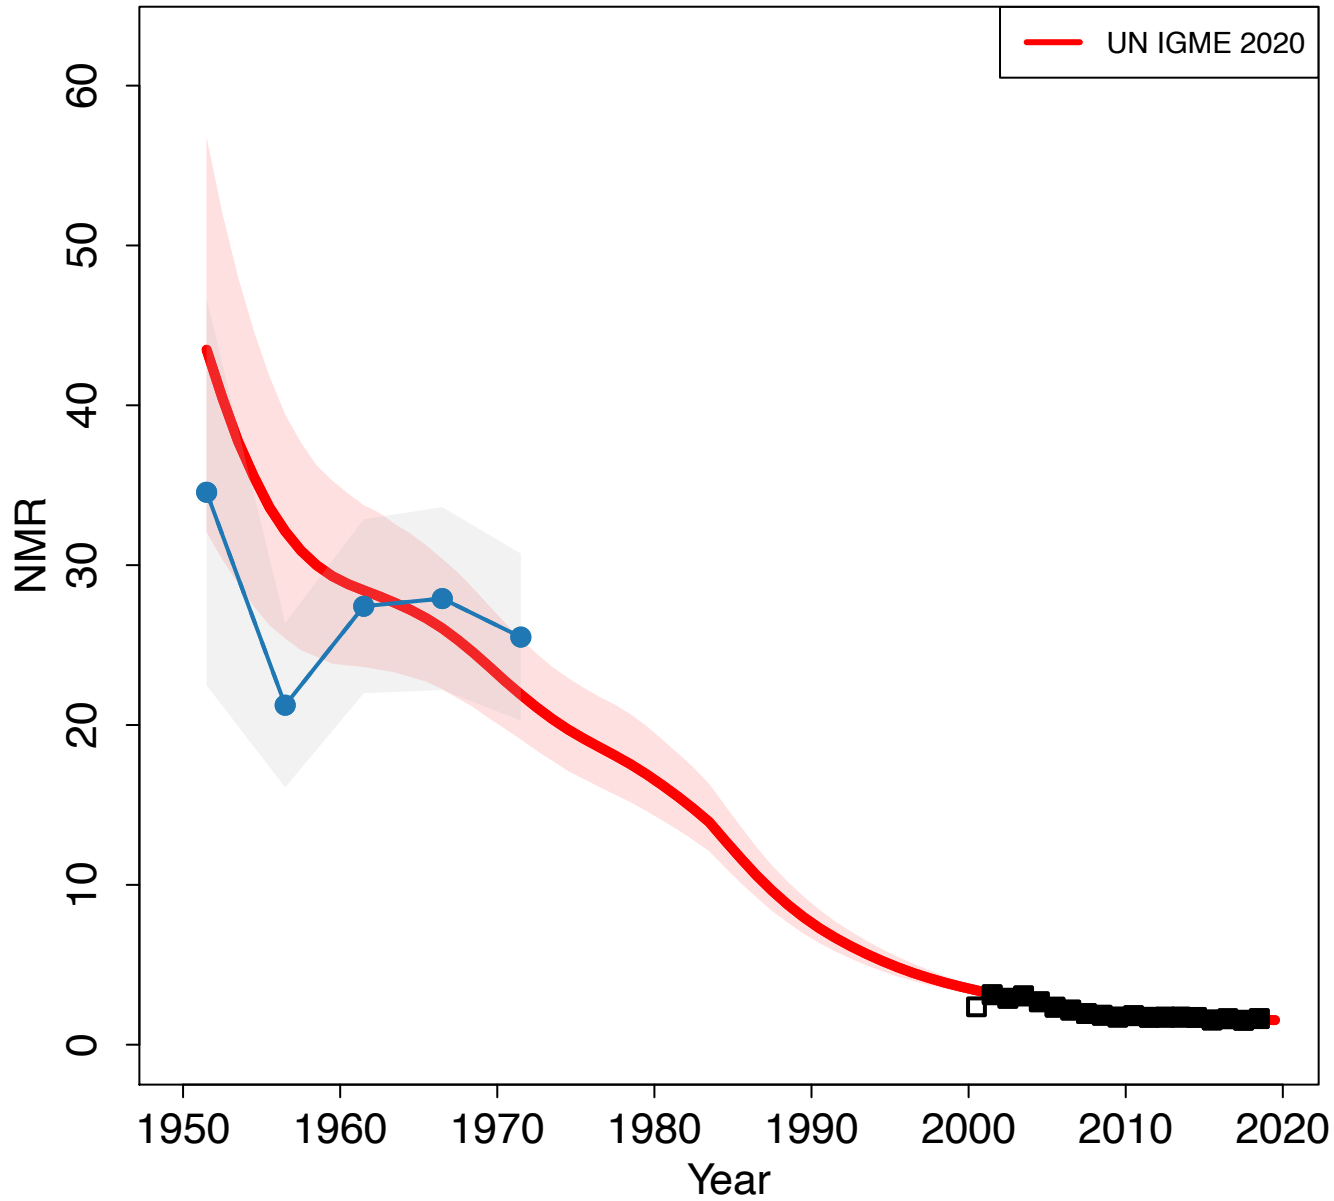

# Zoomed in

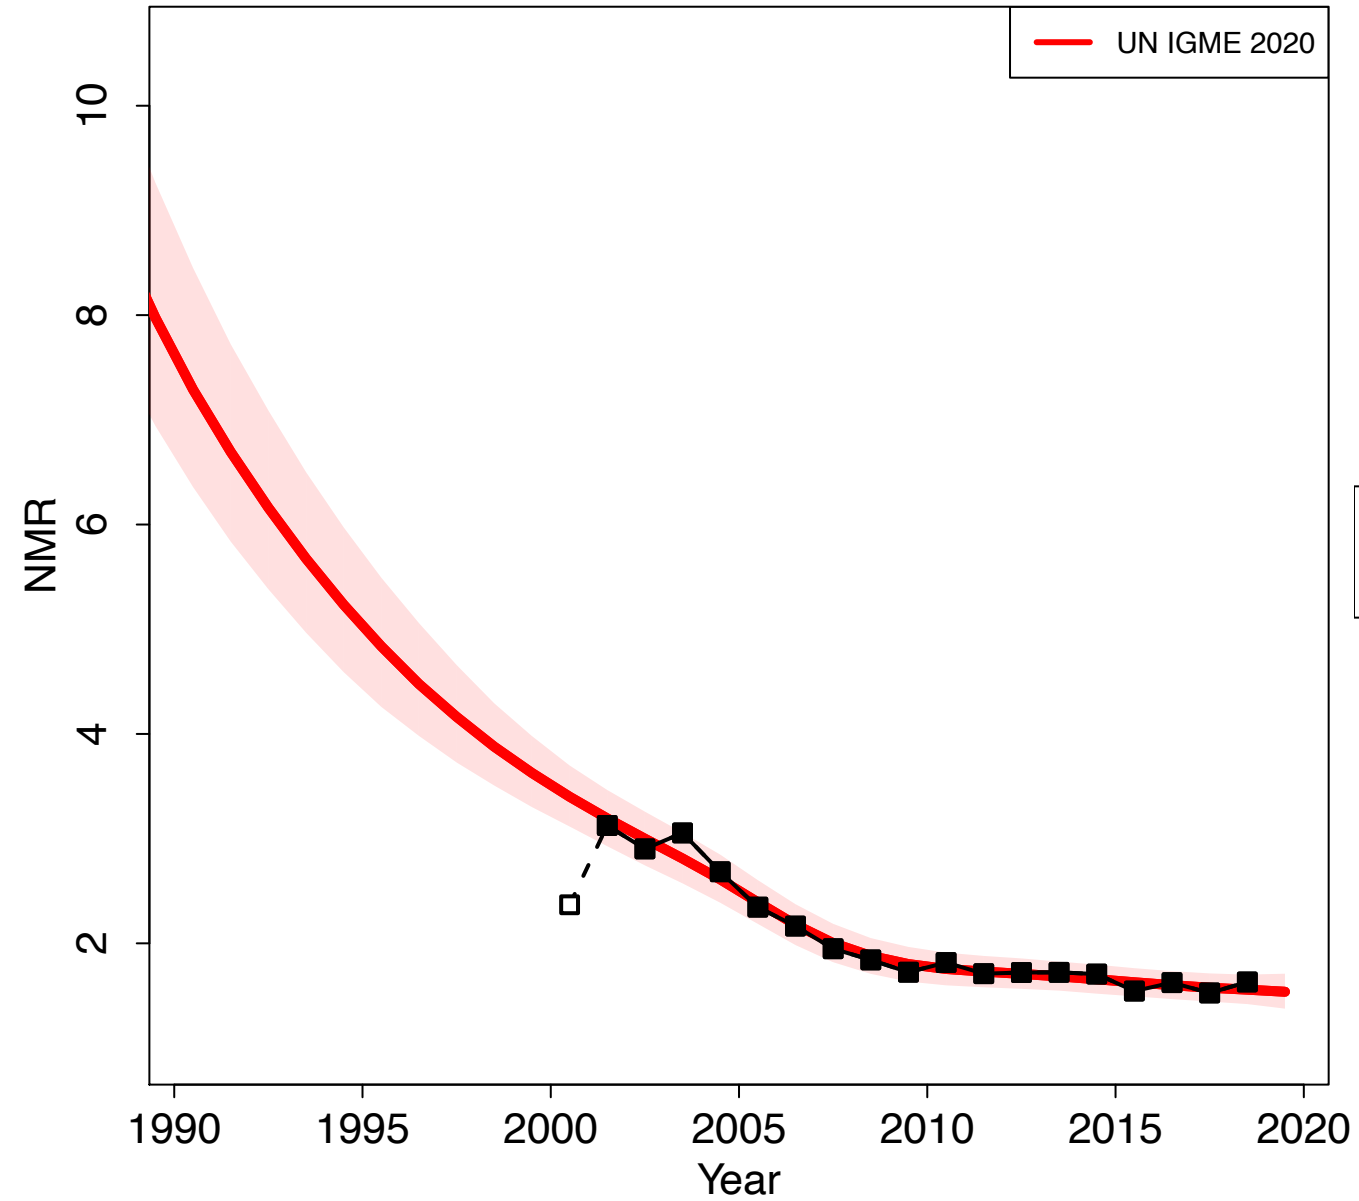

# Kuwait

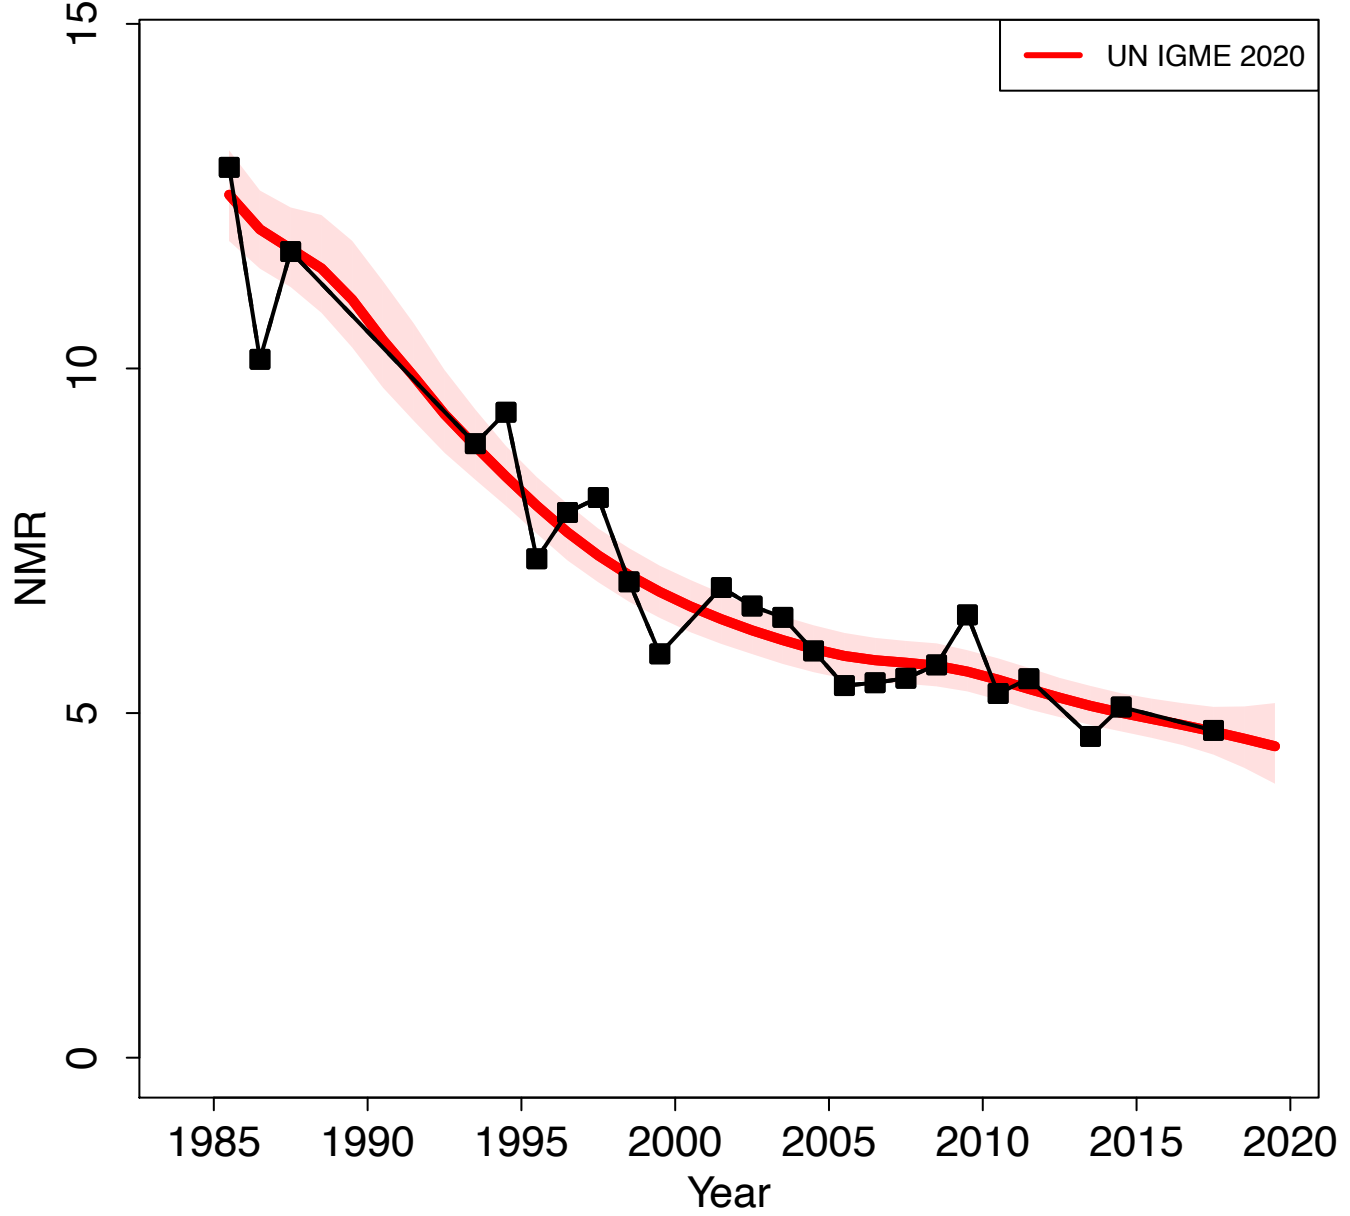

# Zoomed in

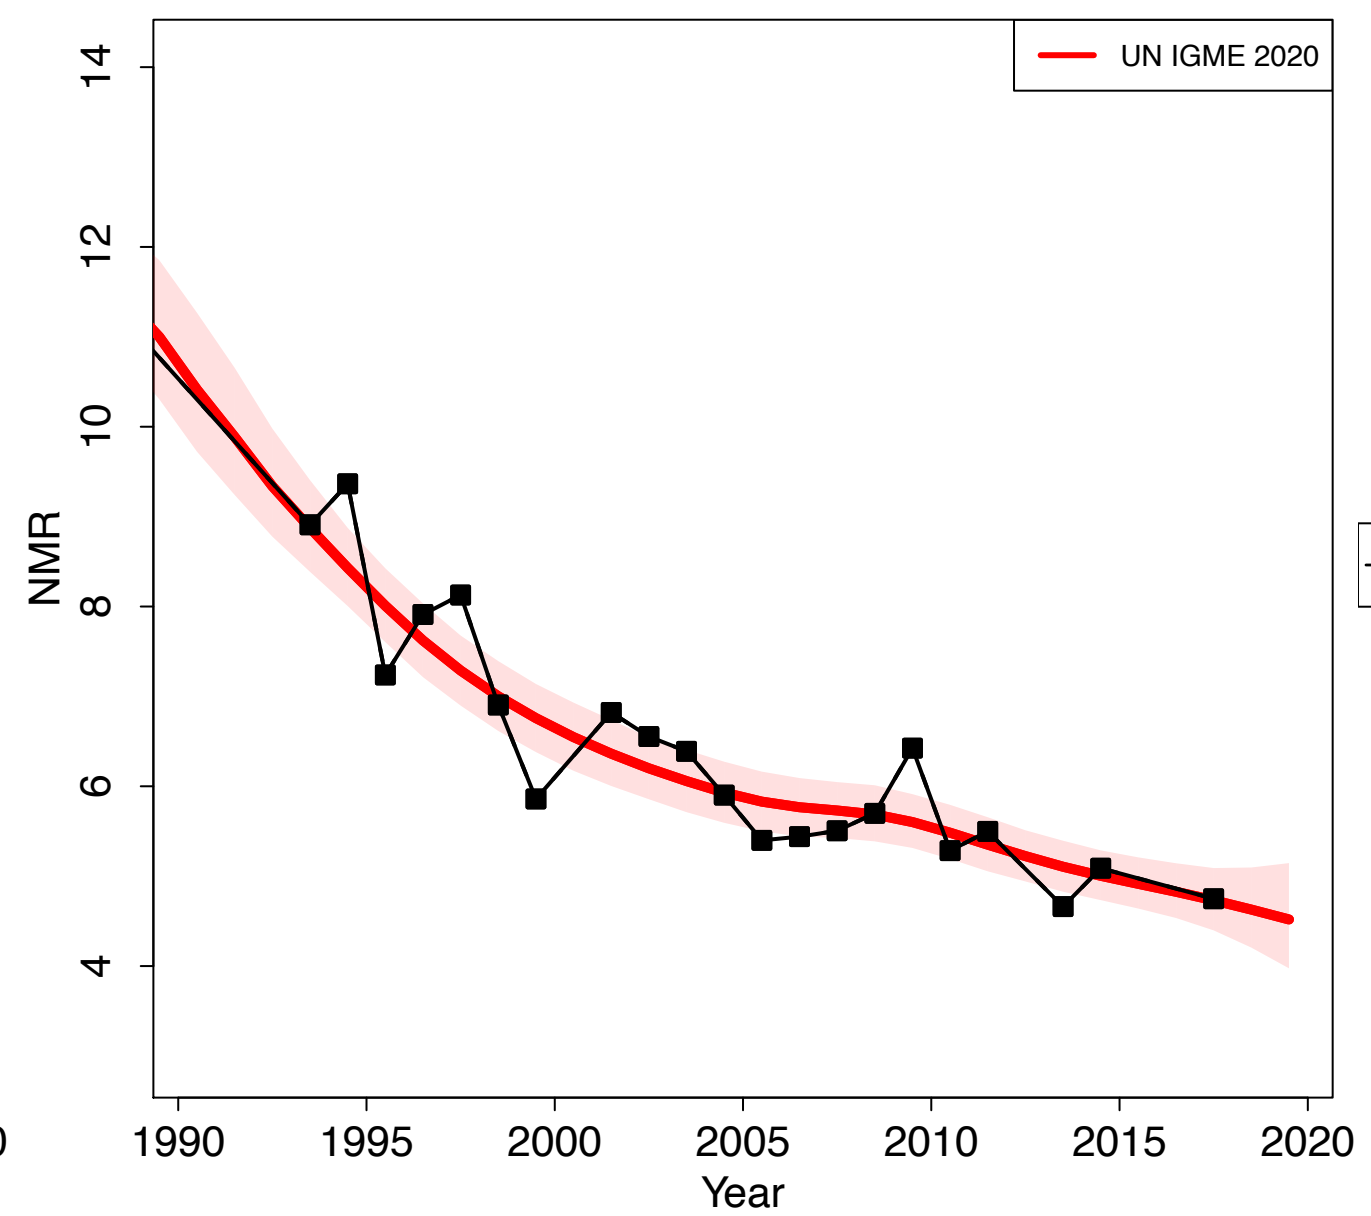

# Kyrgyzstan

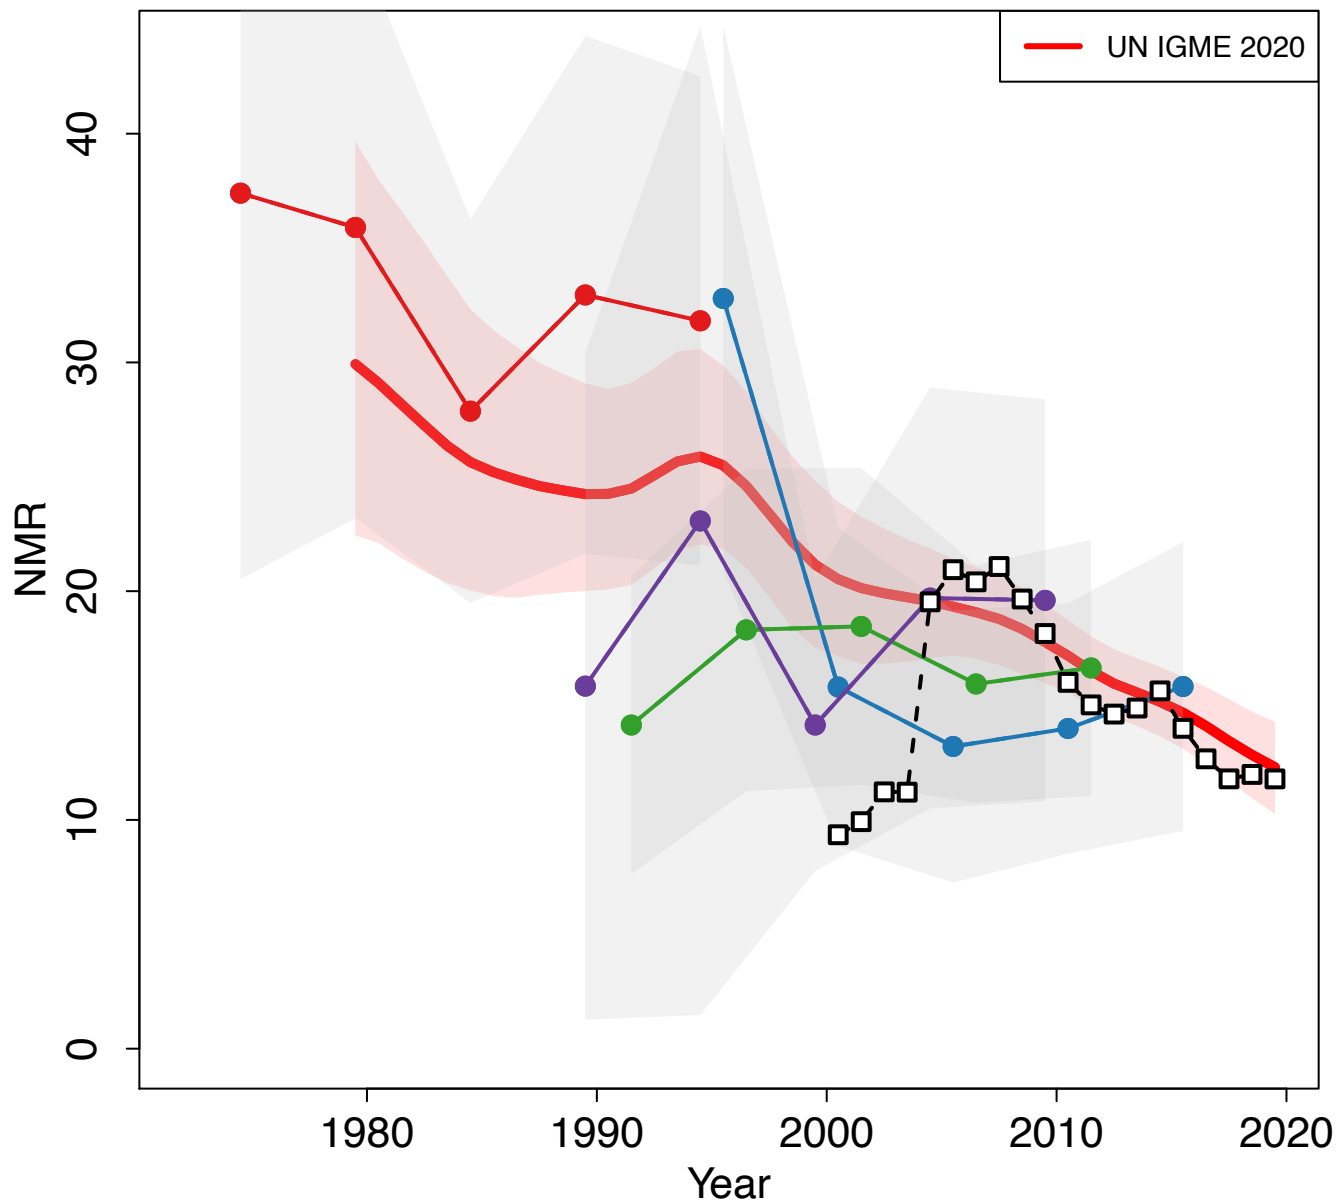

# Zoomed in

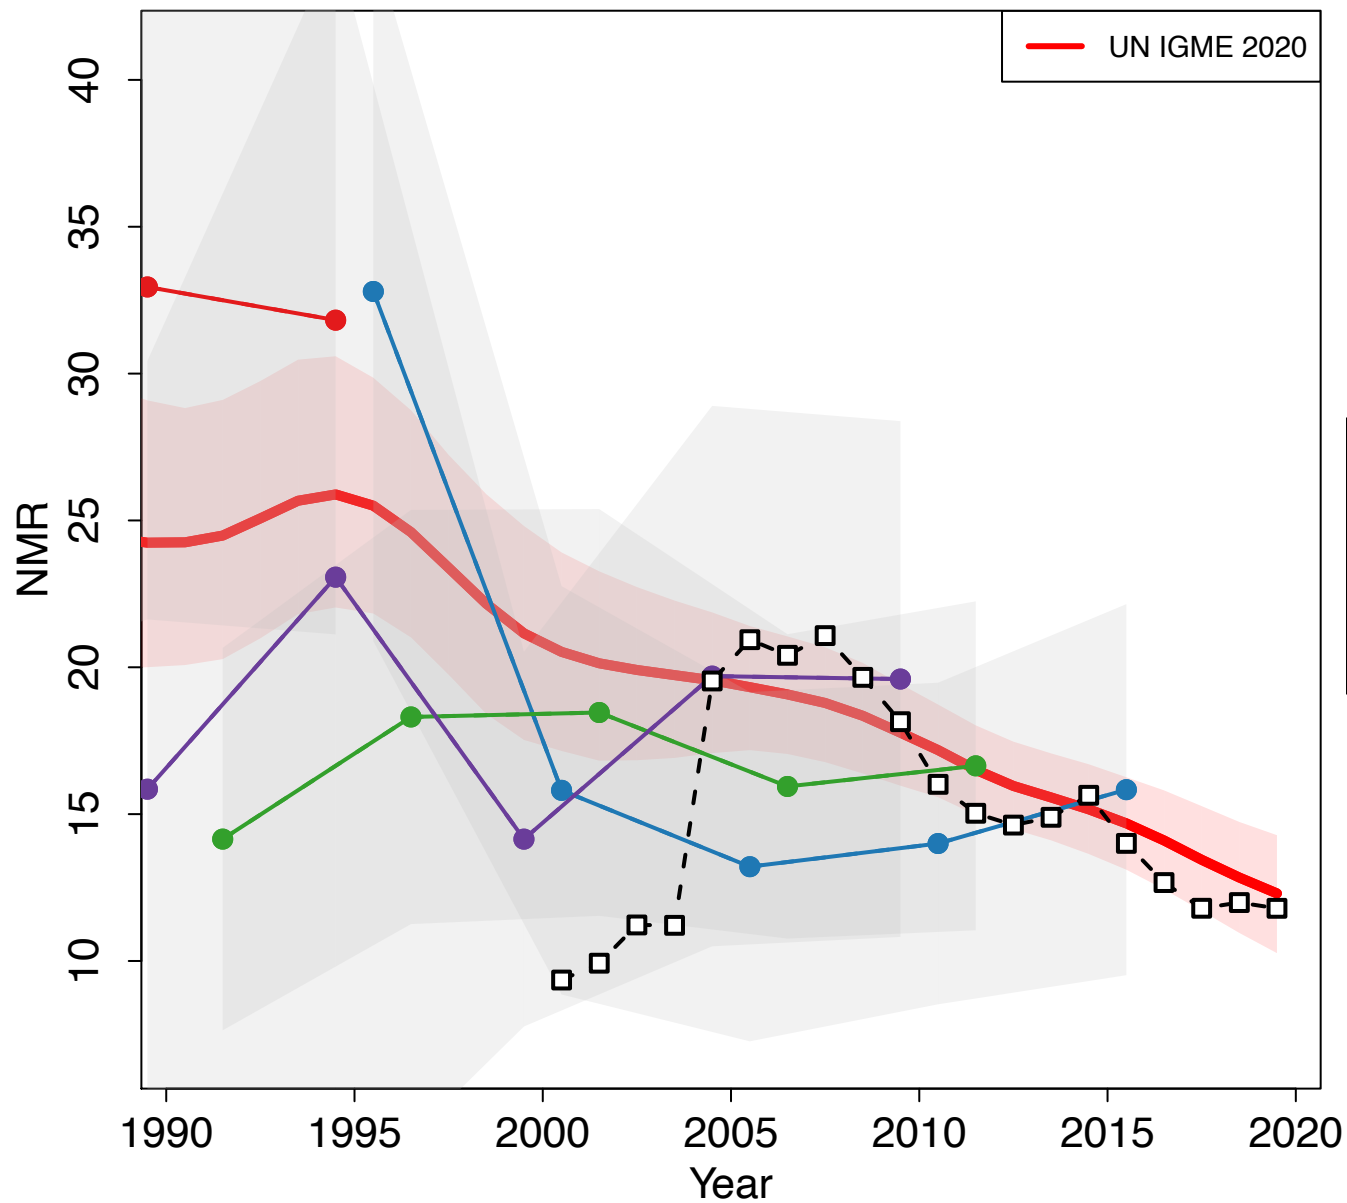

# Lao People's Democratic Republic

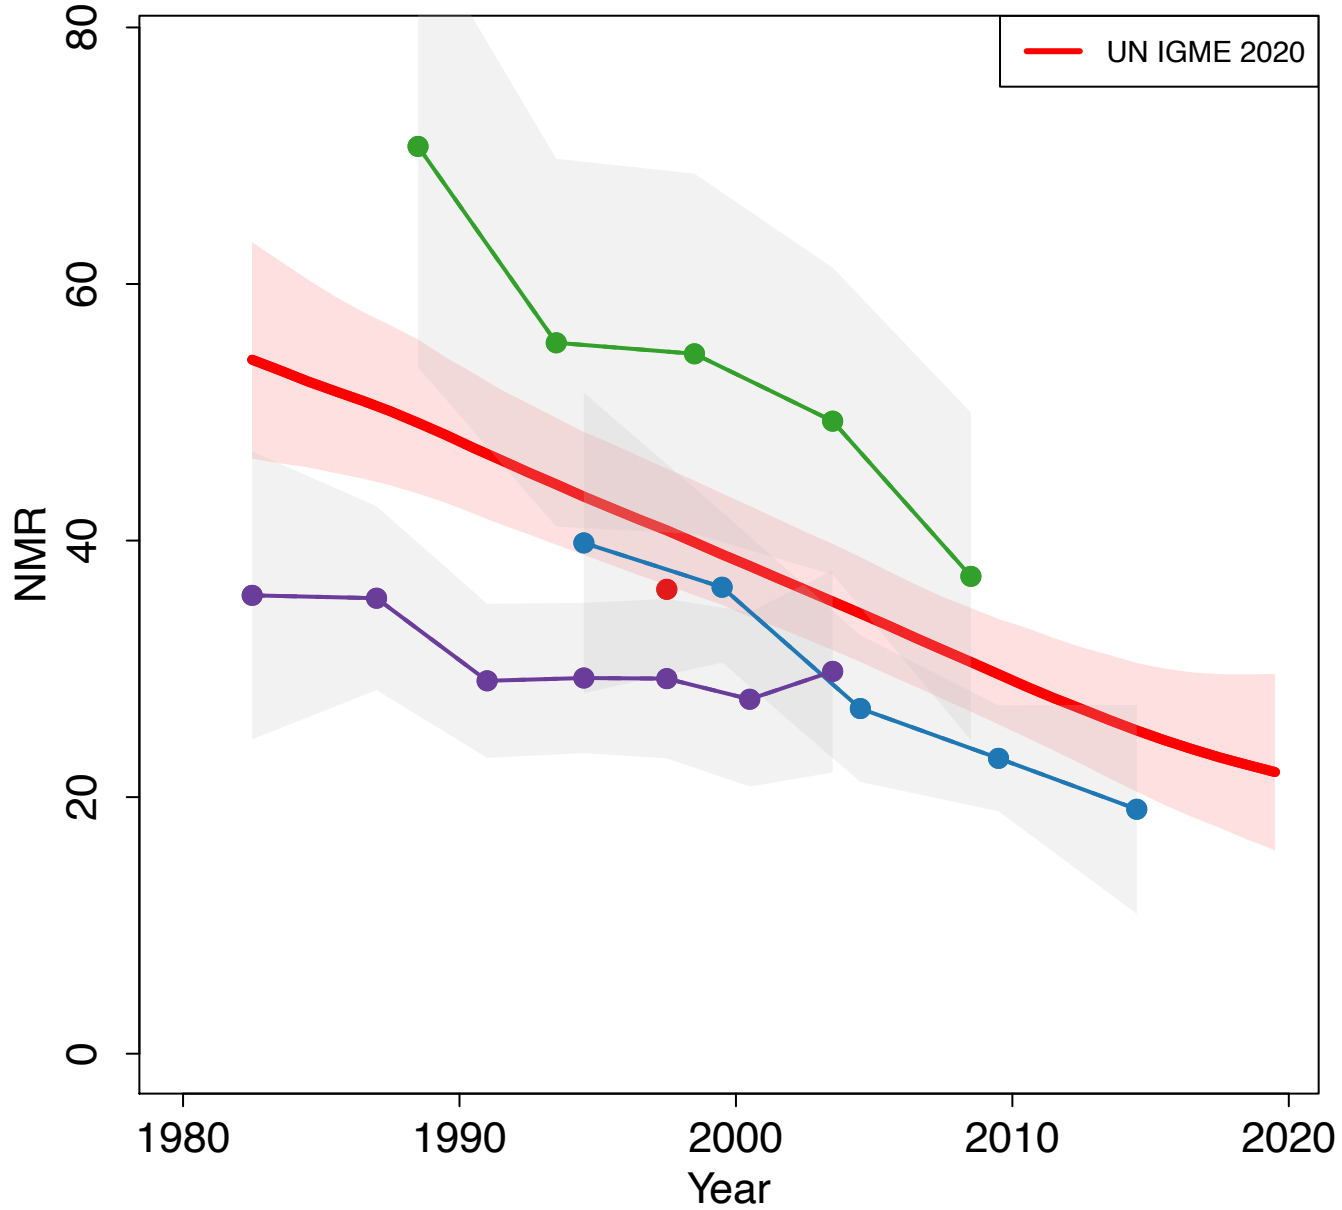

# Zoomed in

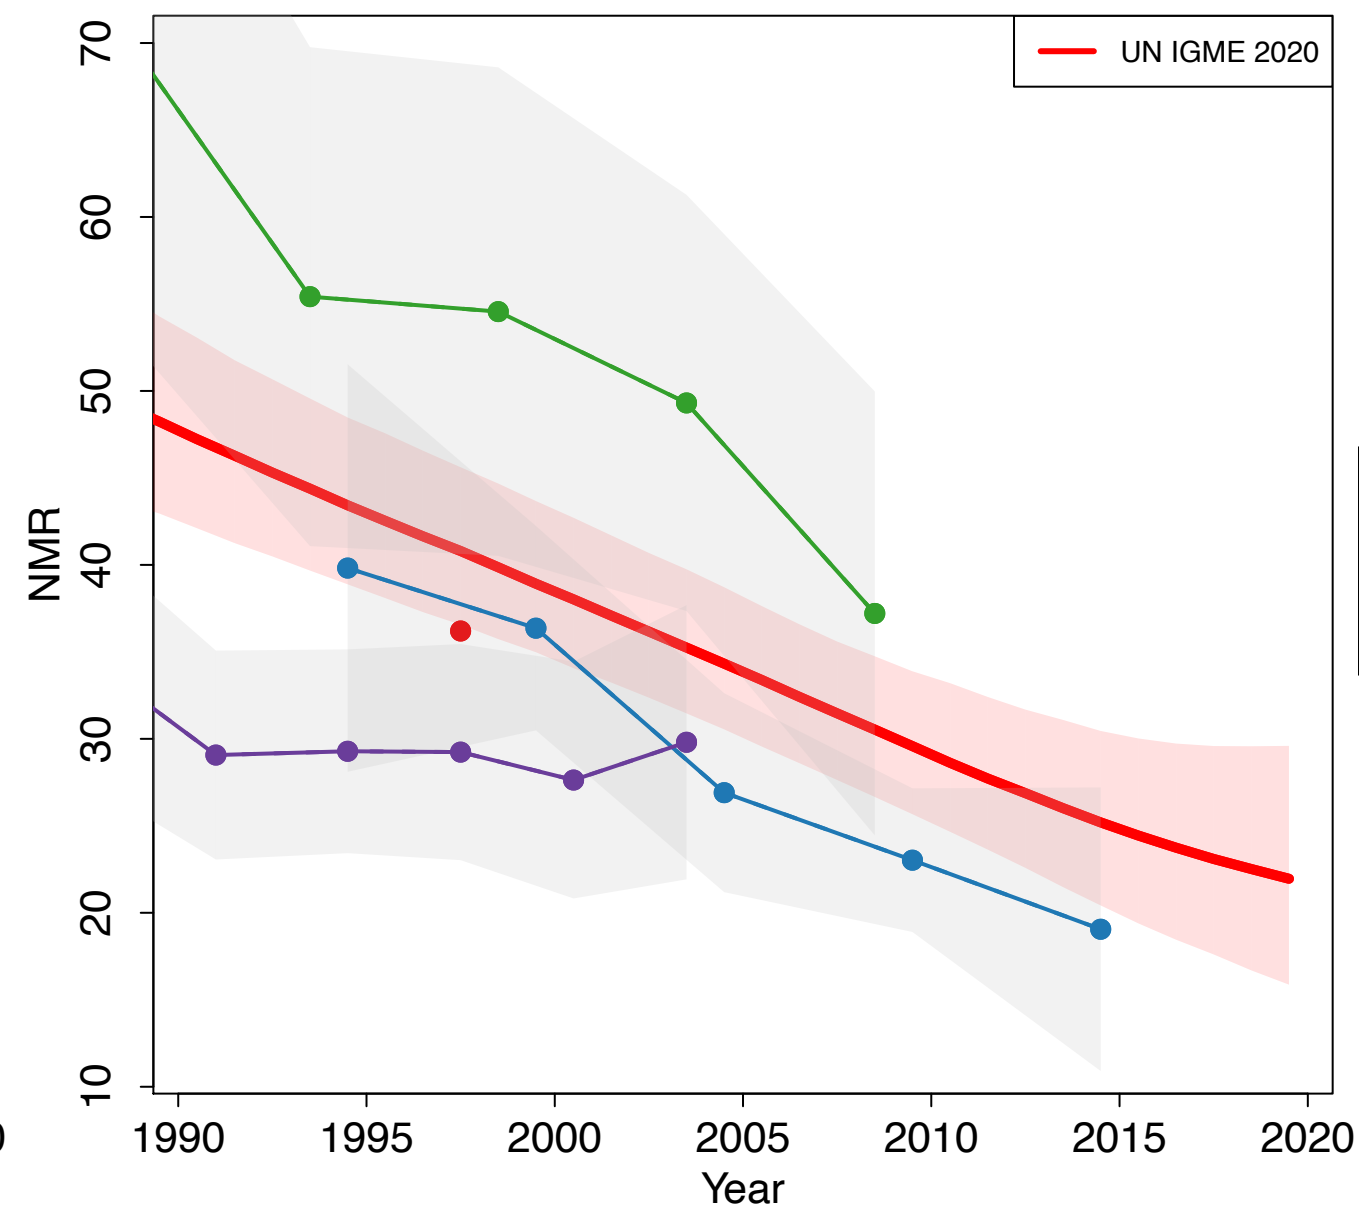

- Reproductive Health Survey 2000 (Others)
- Reproductive Health Survey 2005 (Others)
- Lao Social Indicator Survey (combined MICS4/DHS) 2012 (DHS)
- Multiple Indicator Cluster Survey 2017 (MICS)

# Latvia

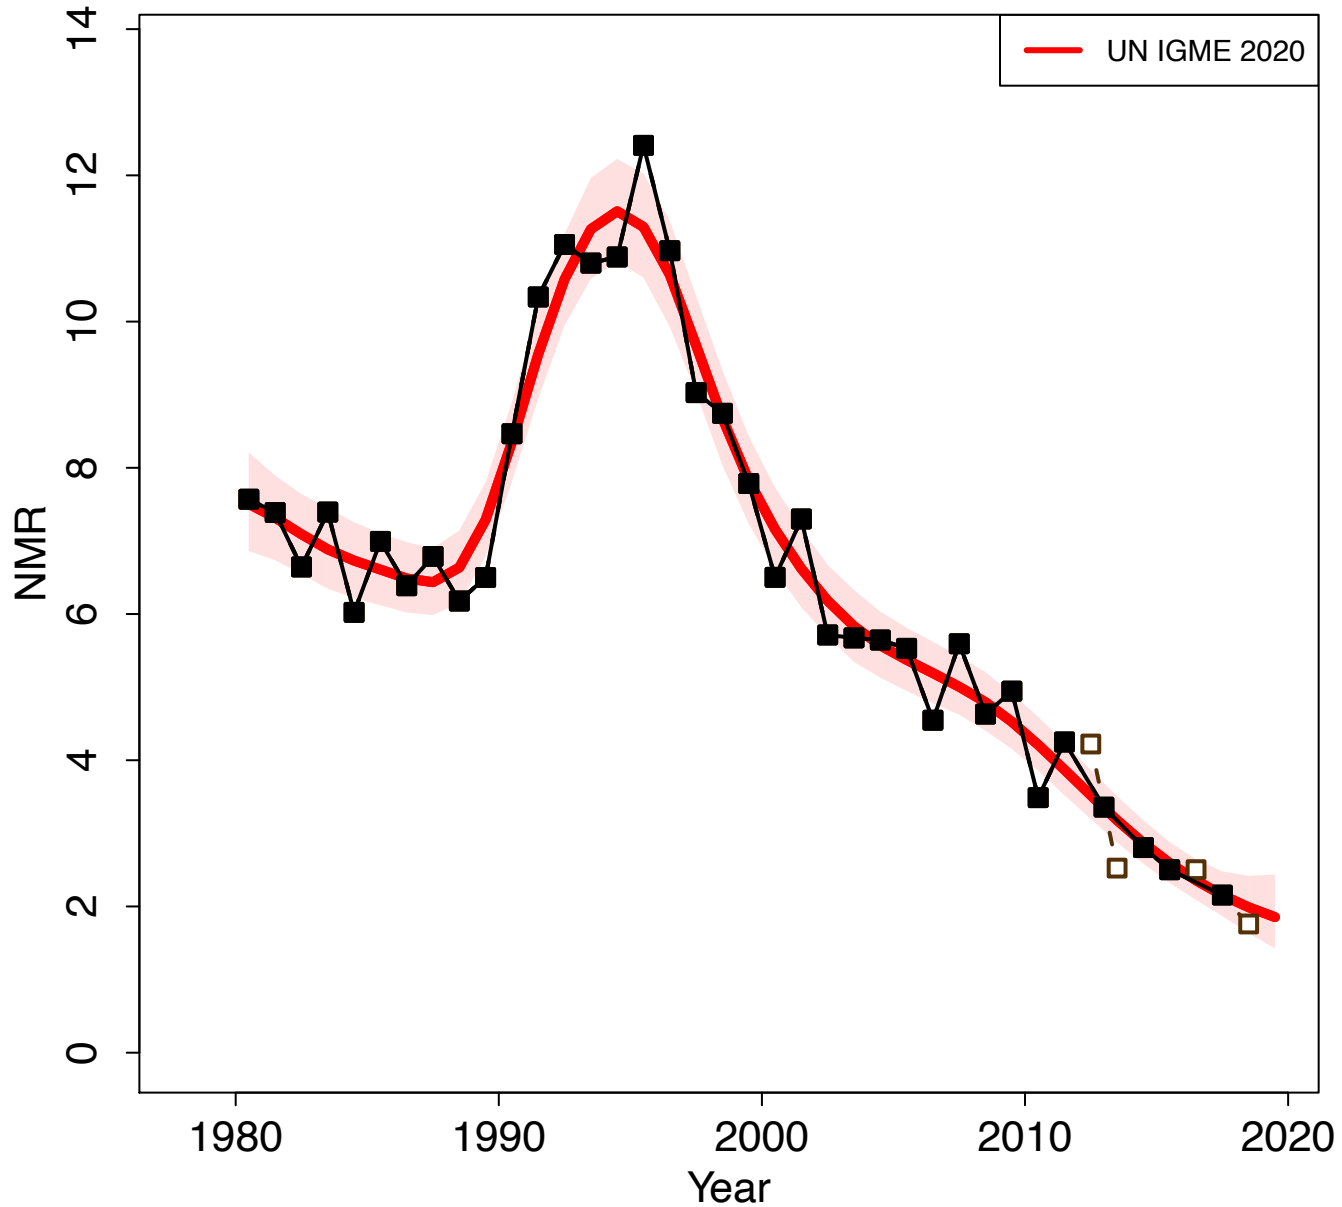

# Zoomed in

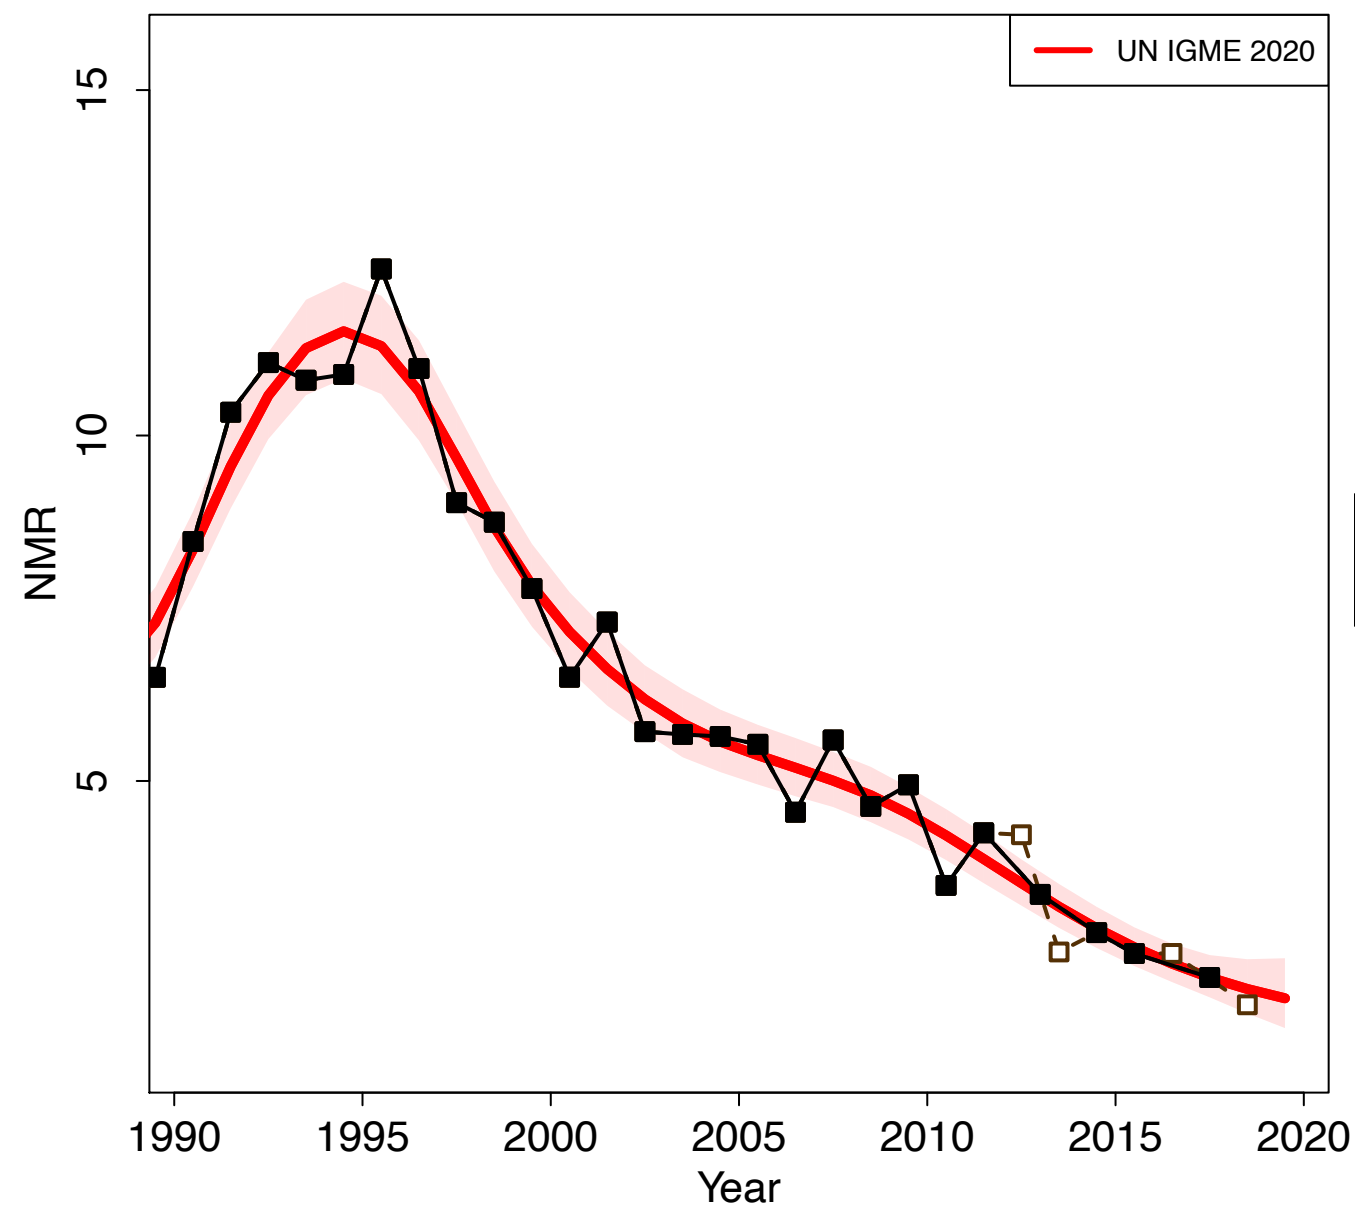

# Lebanon

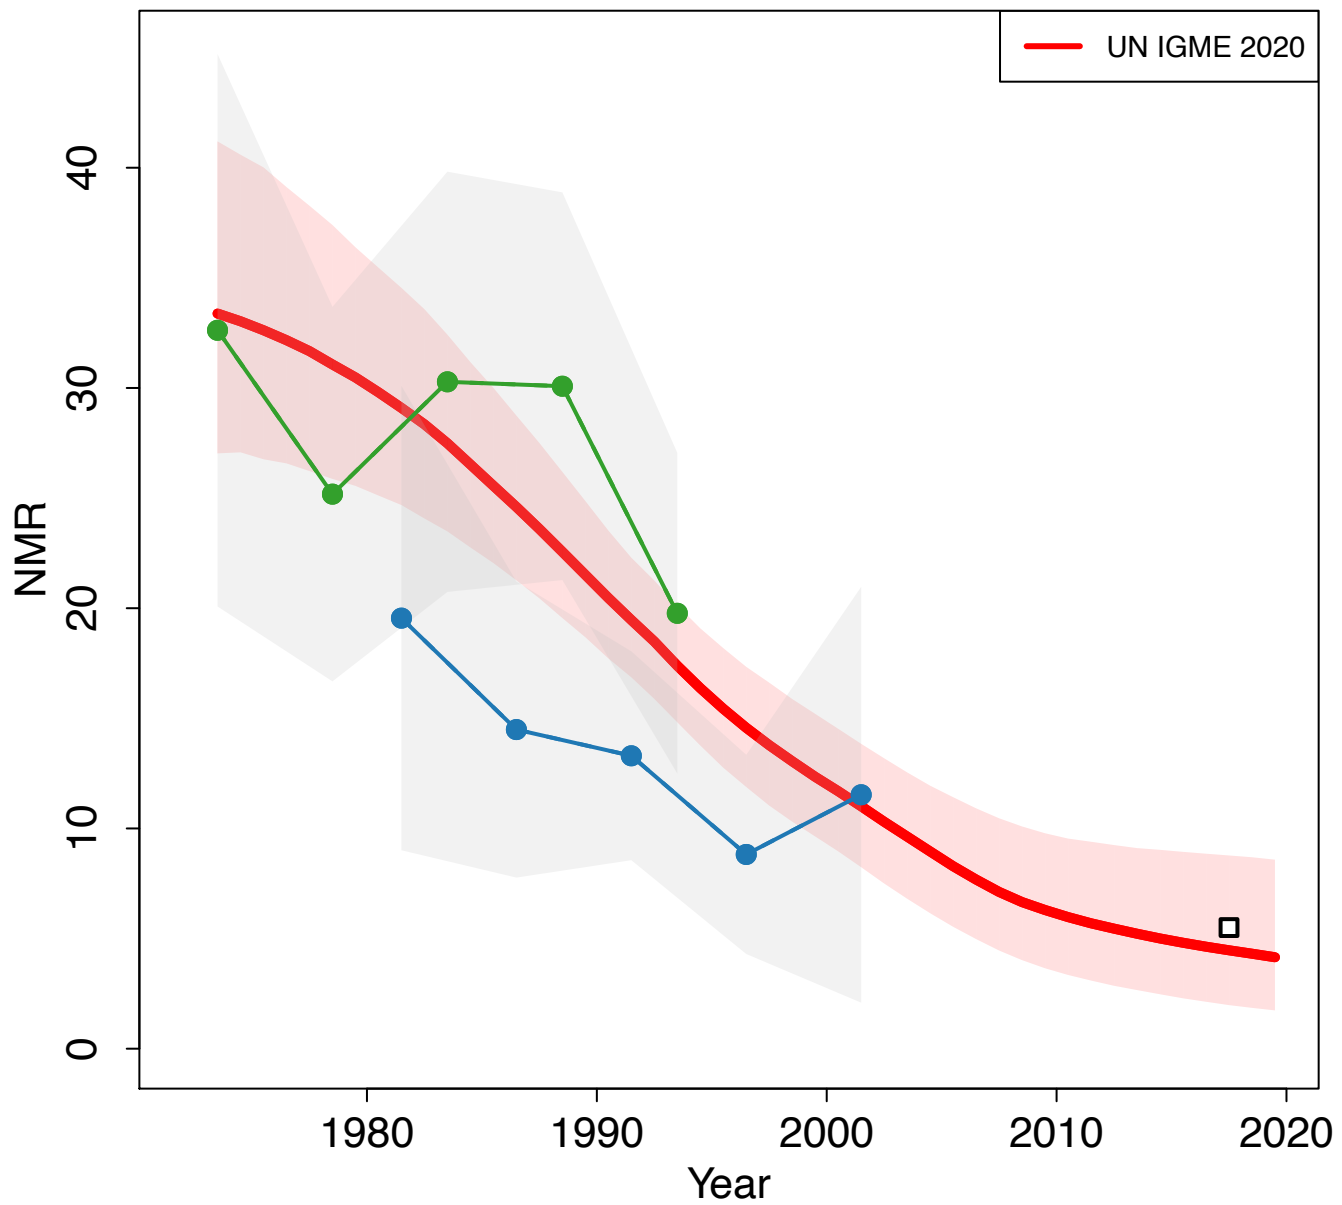

# Zoomed in

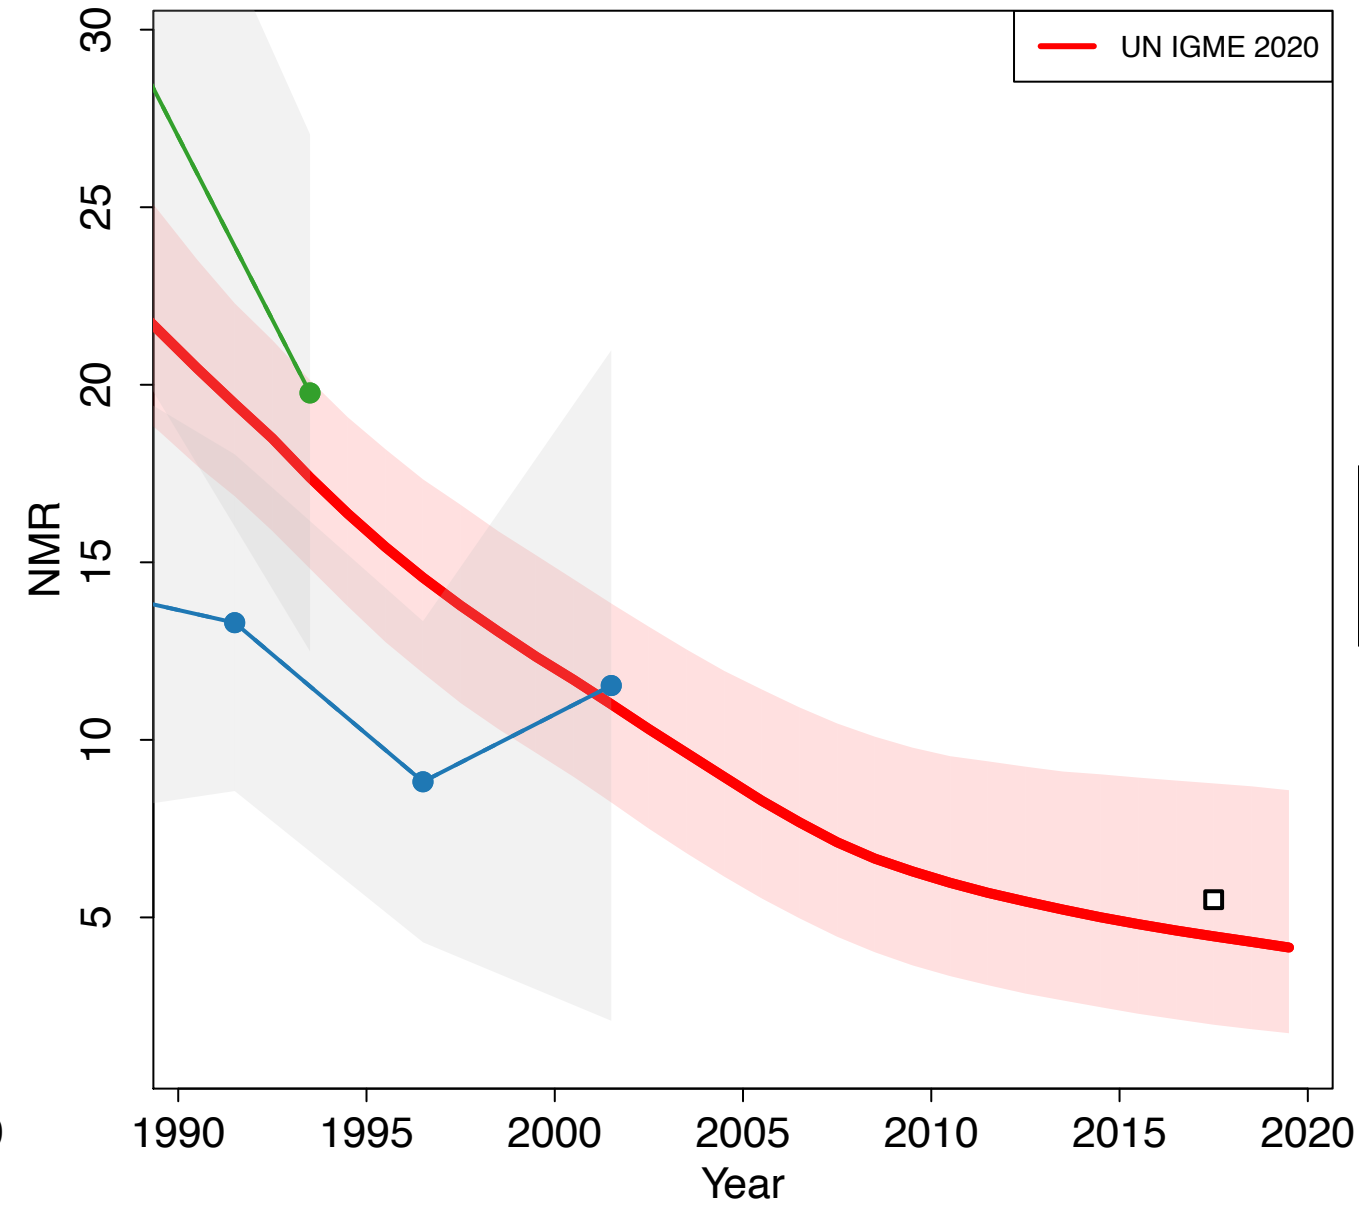

# Lesotho

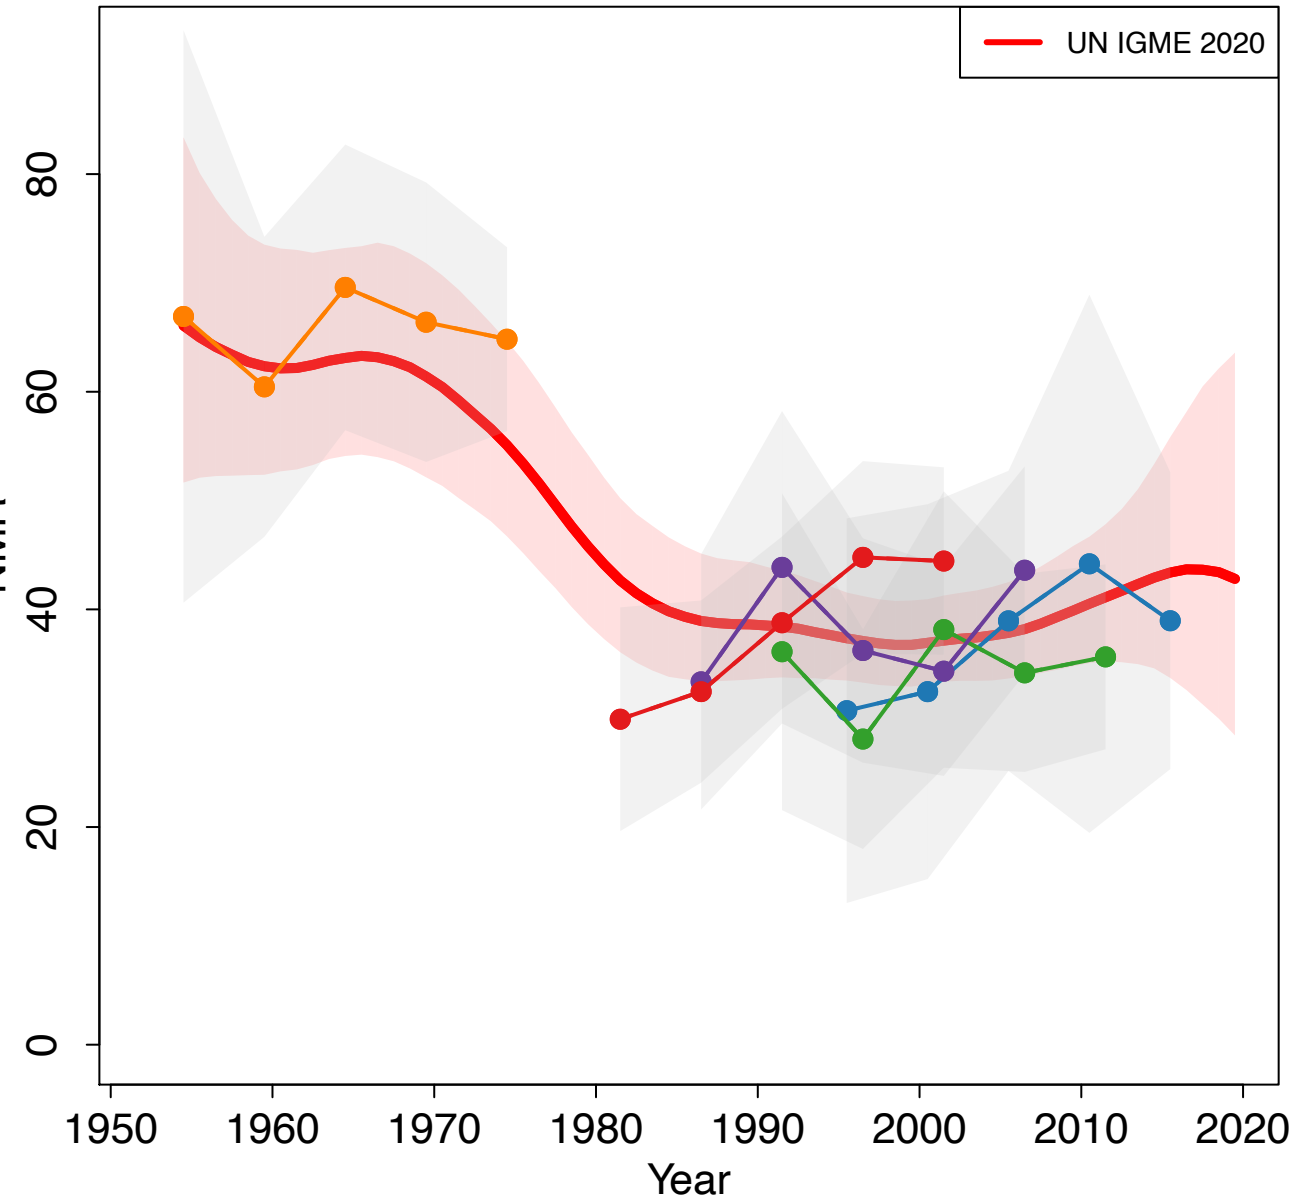

# Zoomed in

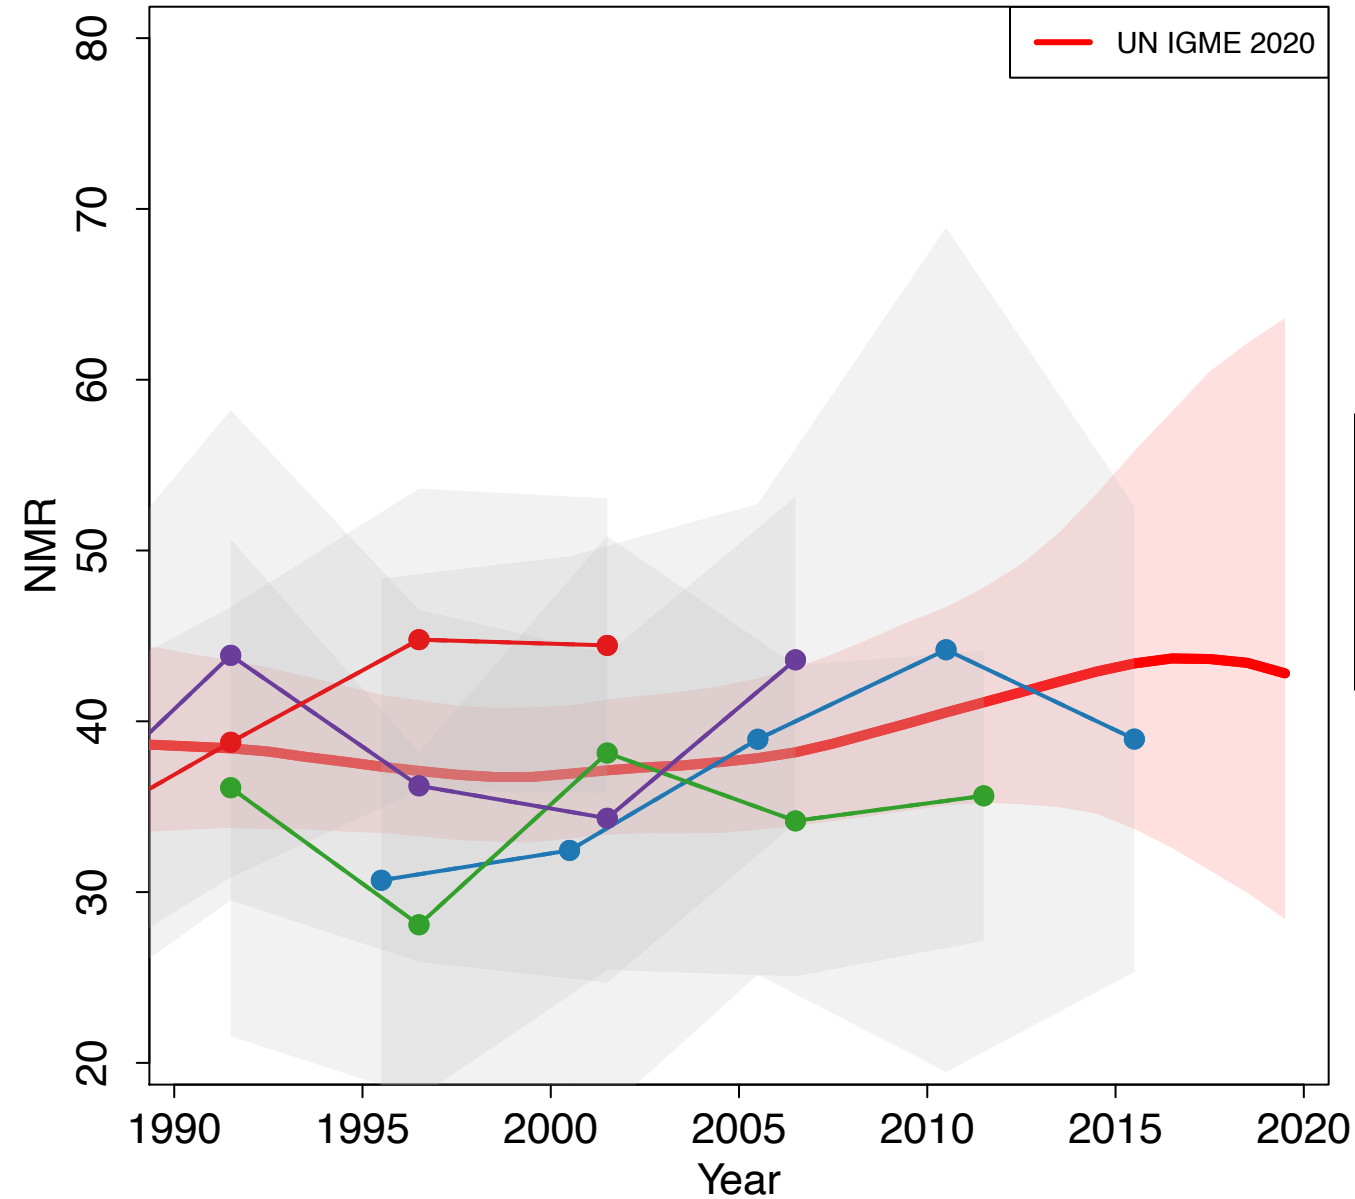

# Liberia

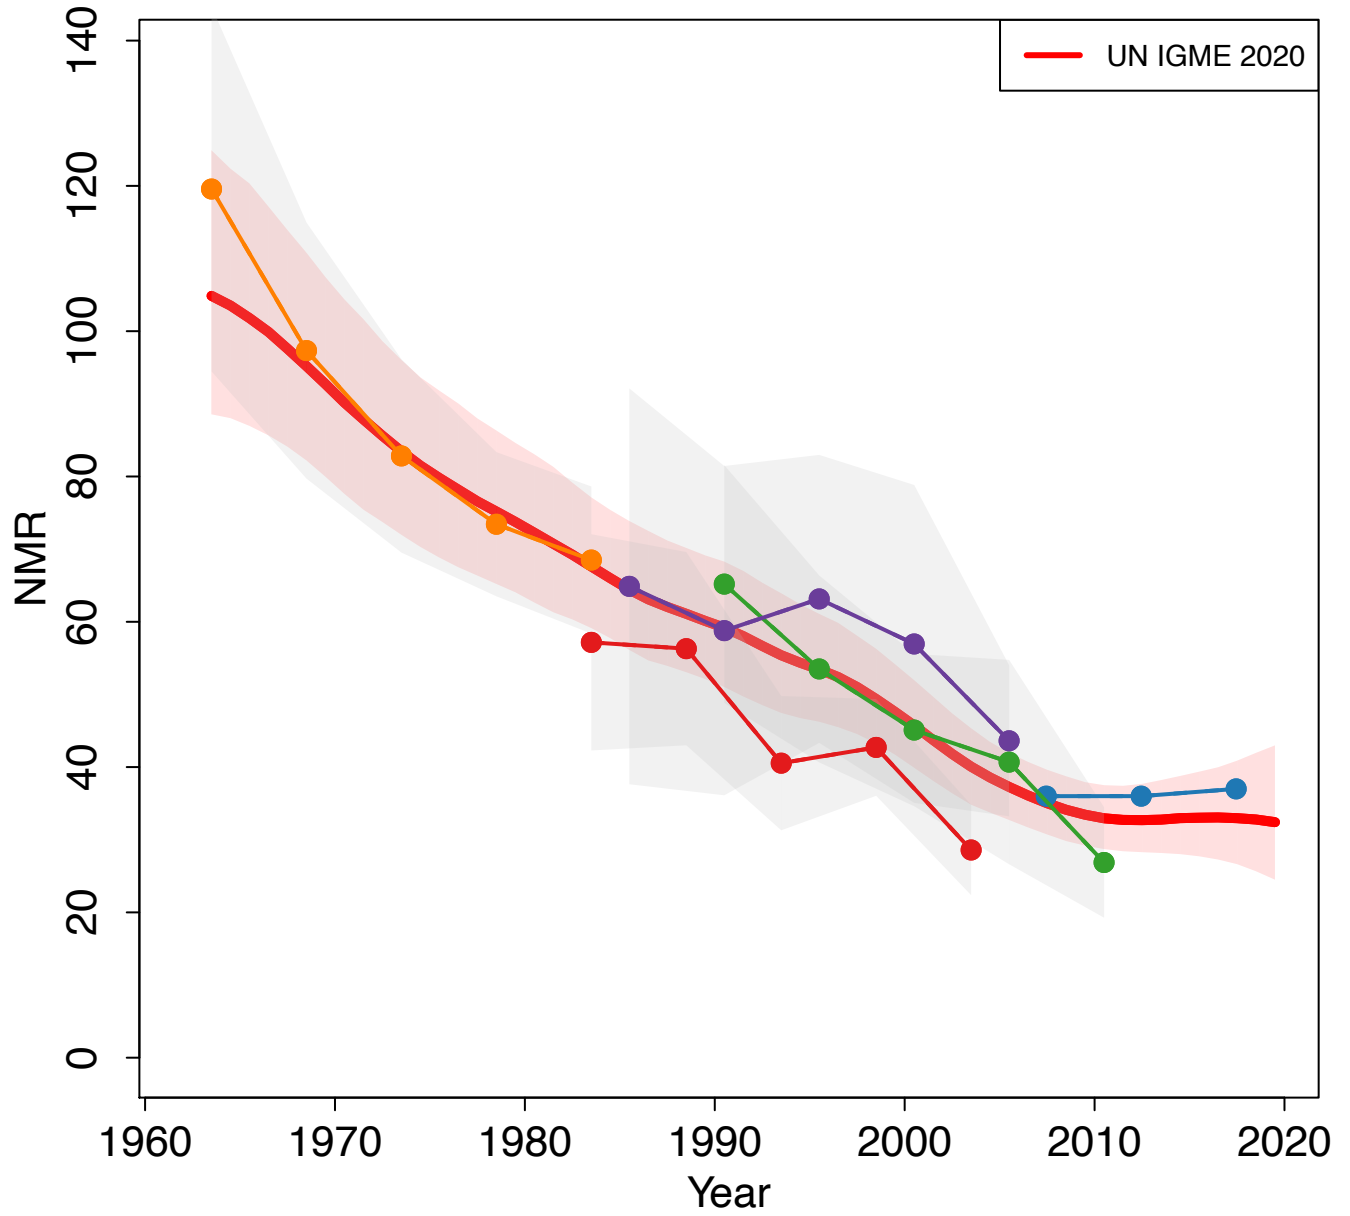

# Zoomed in

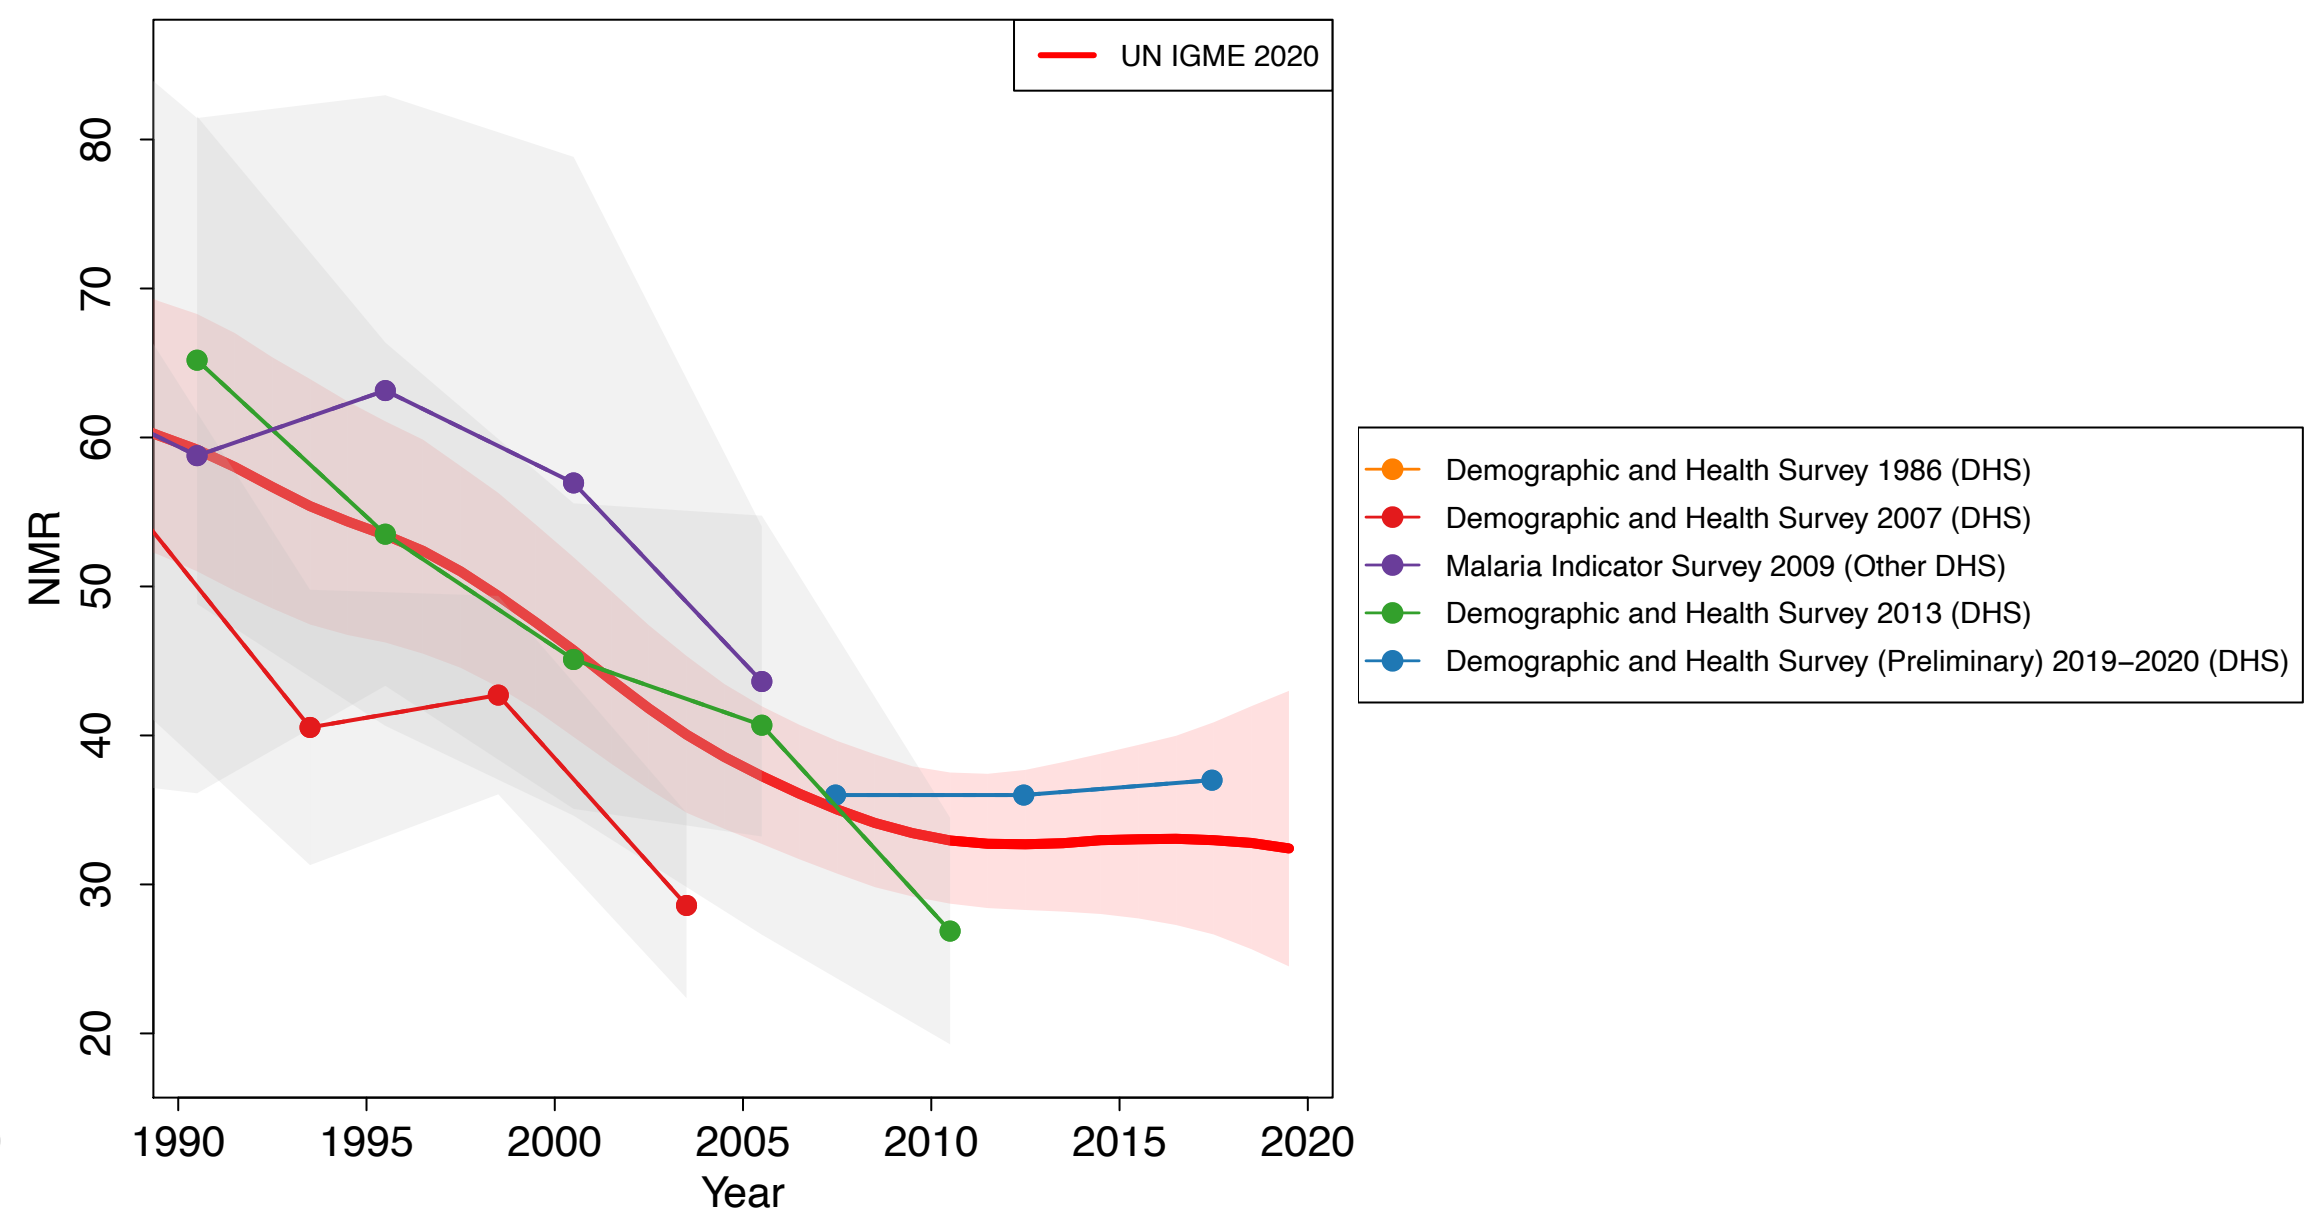



# Libya

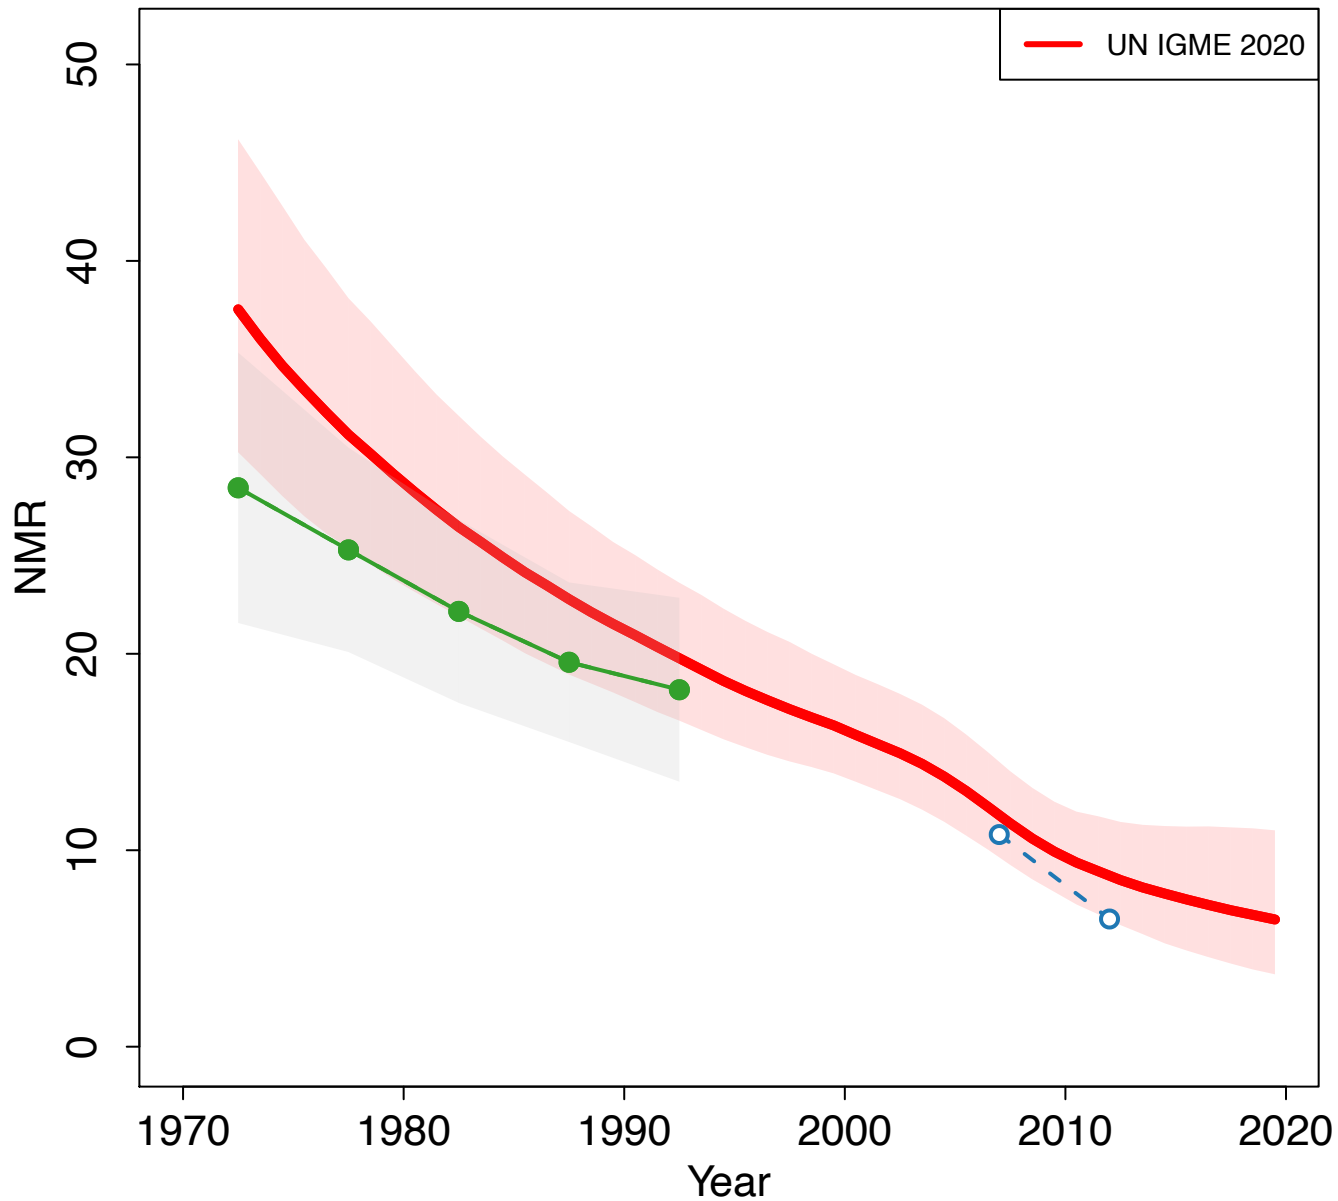

# Zoomed in

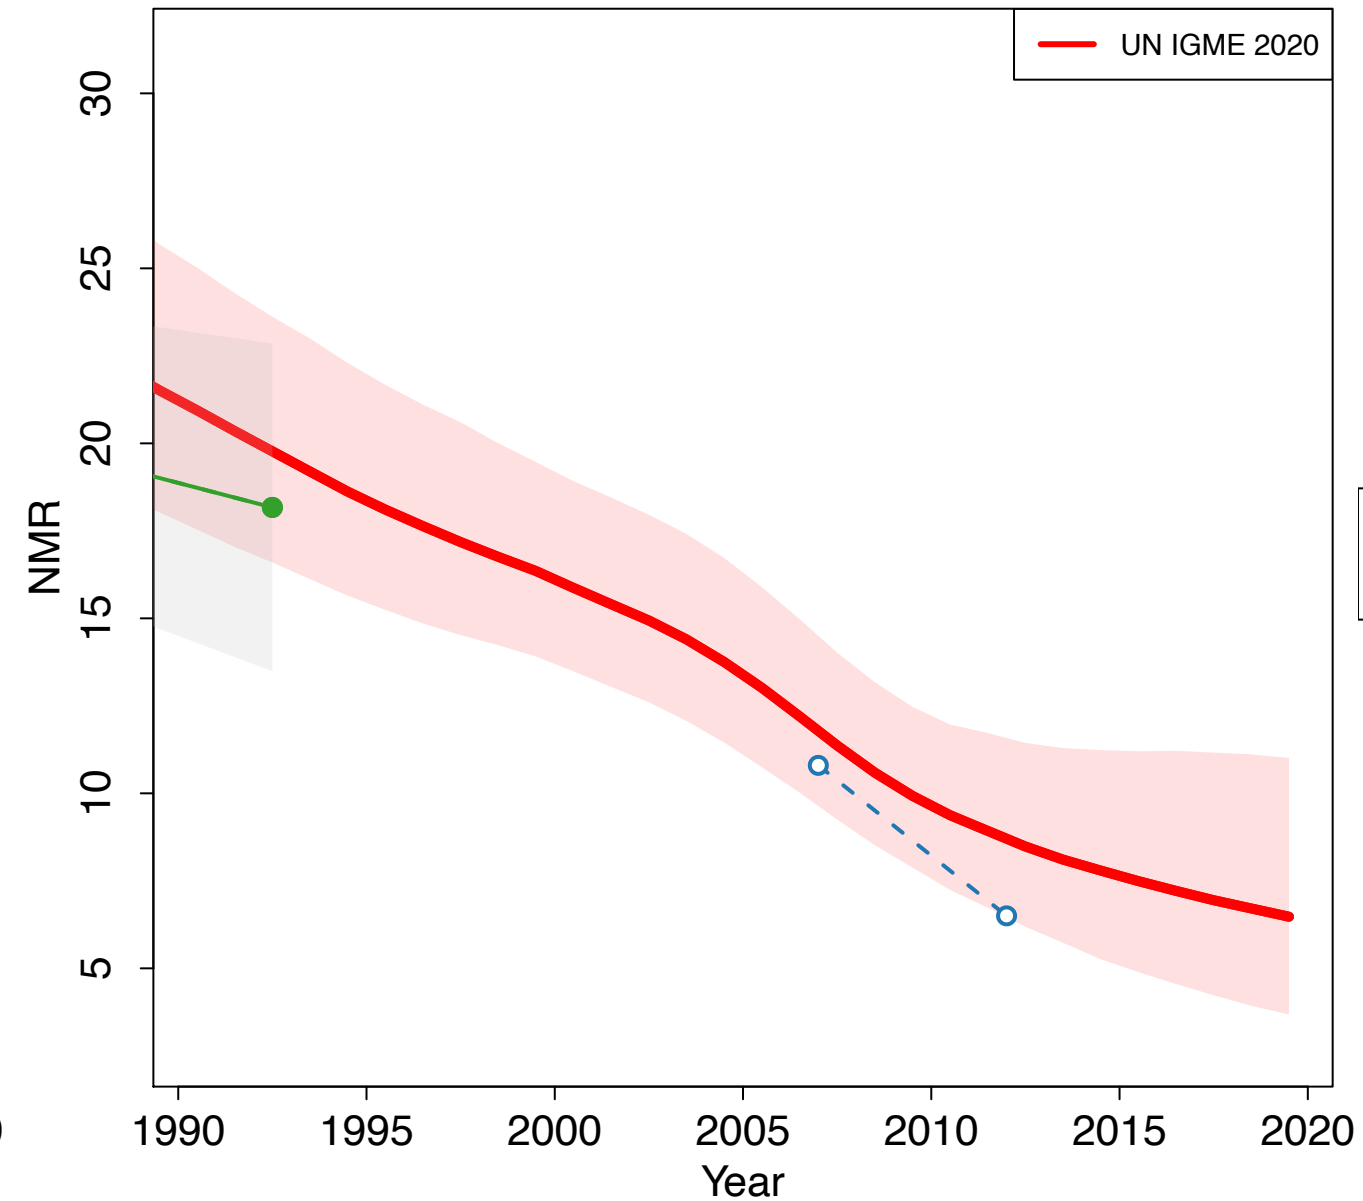

# Lithuania

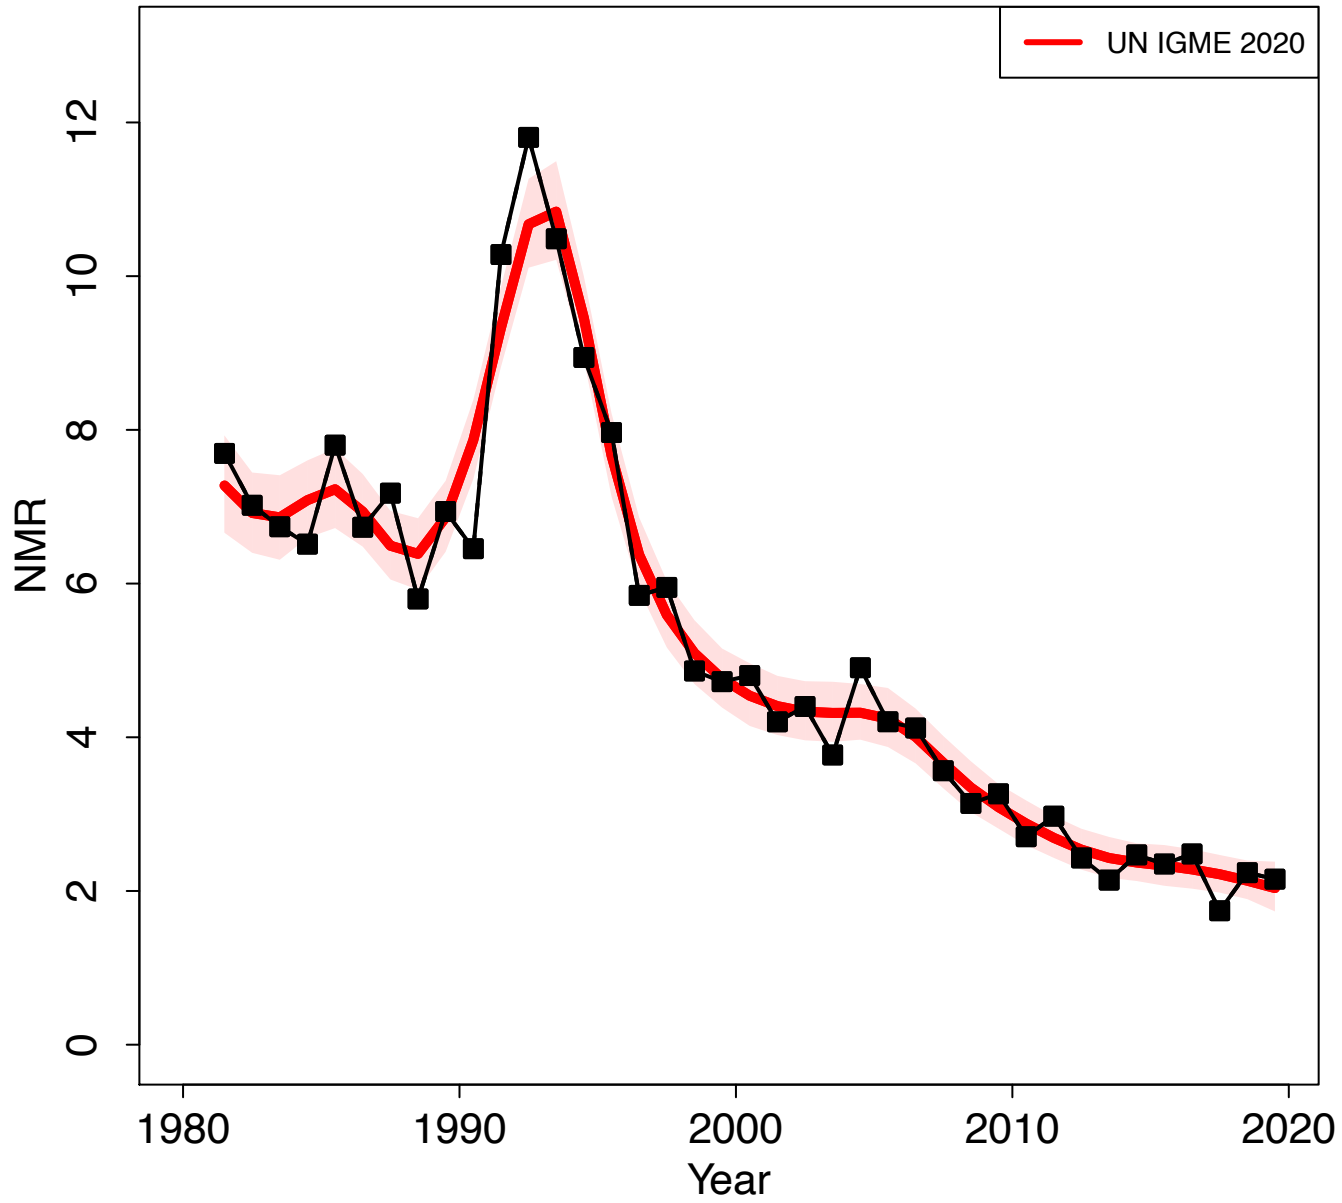

# Zoomed in

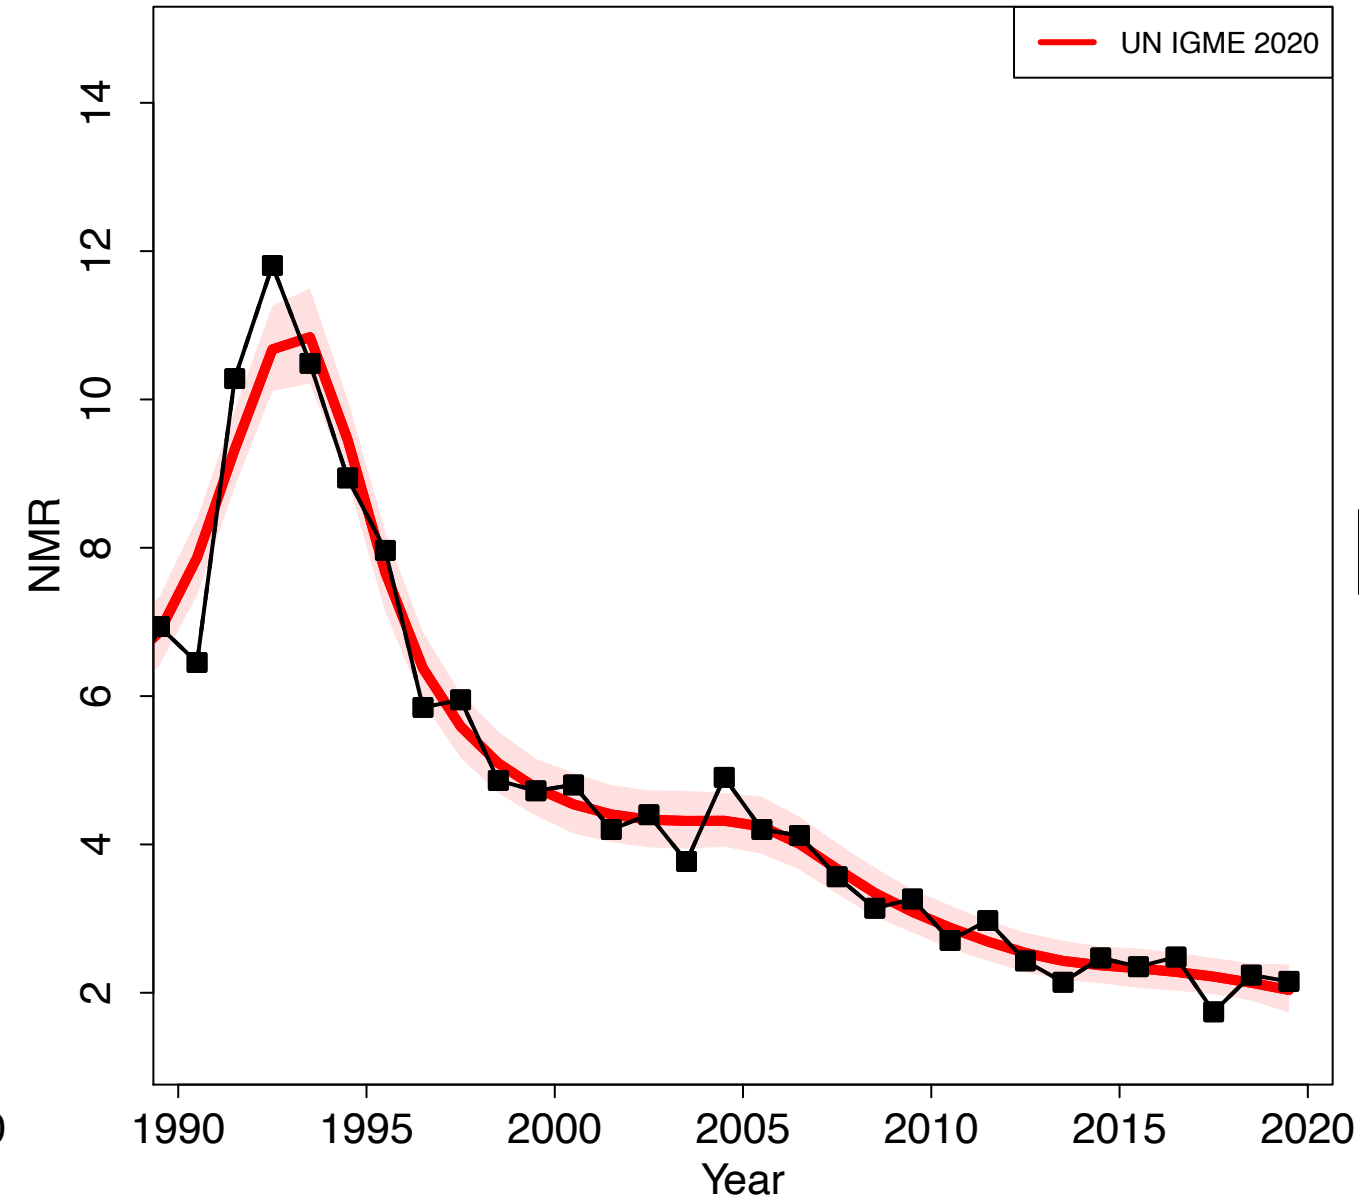

# Luxembourg

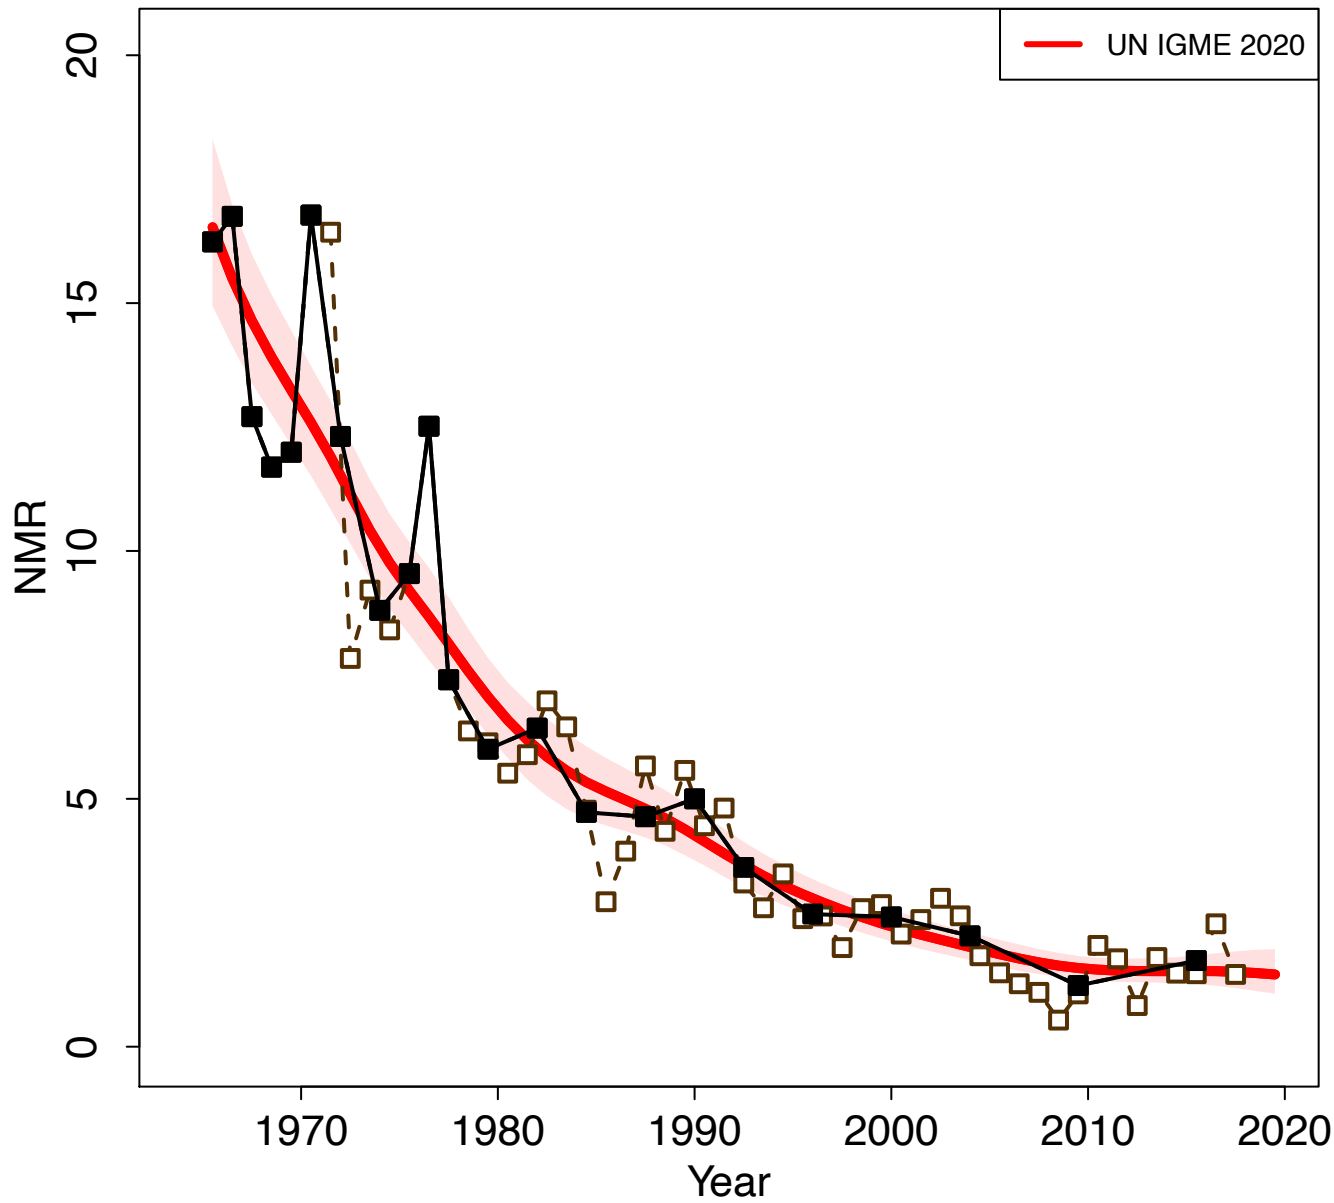

# Zoomed in

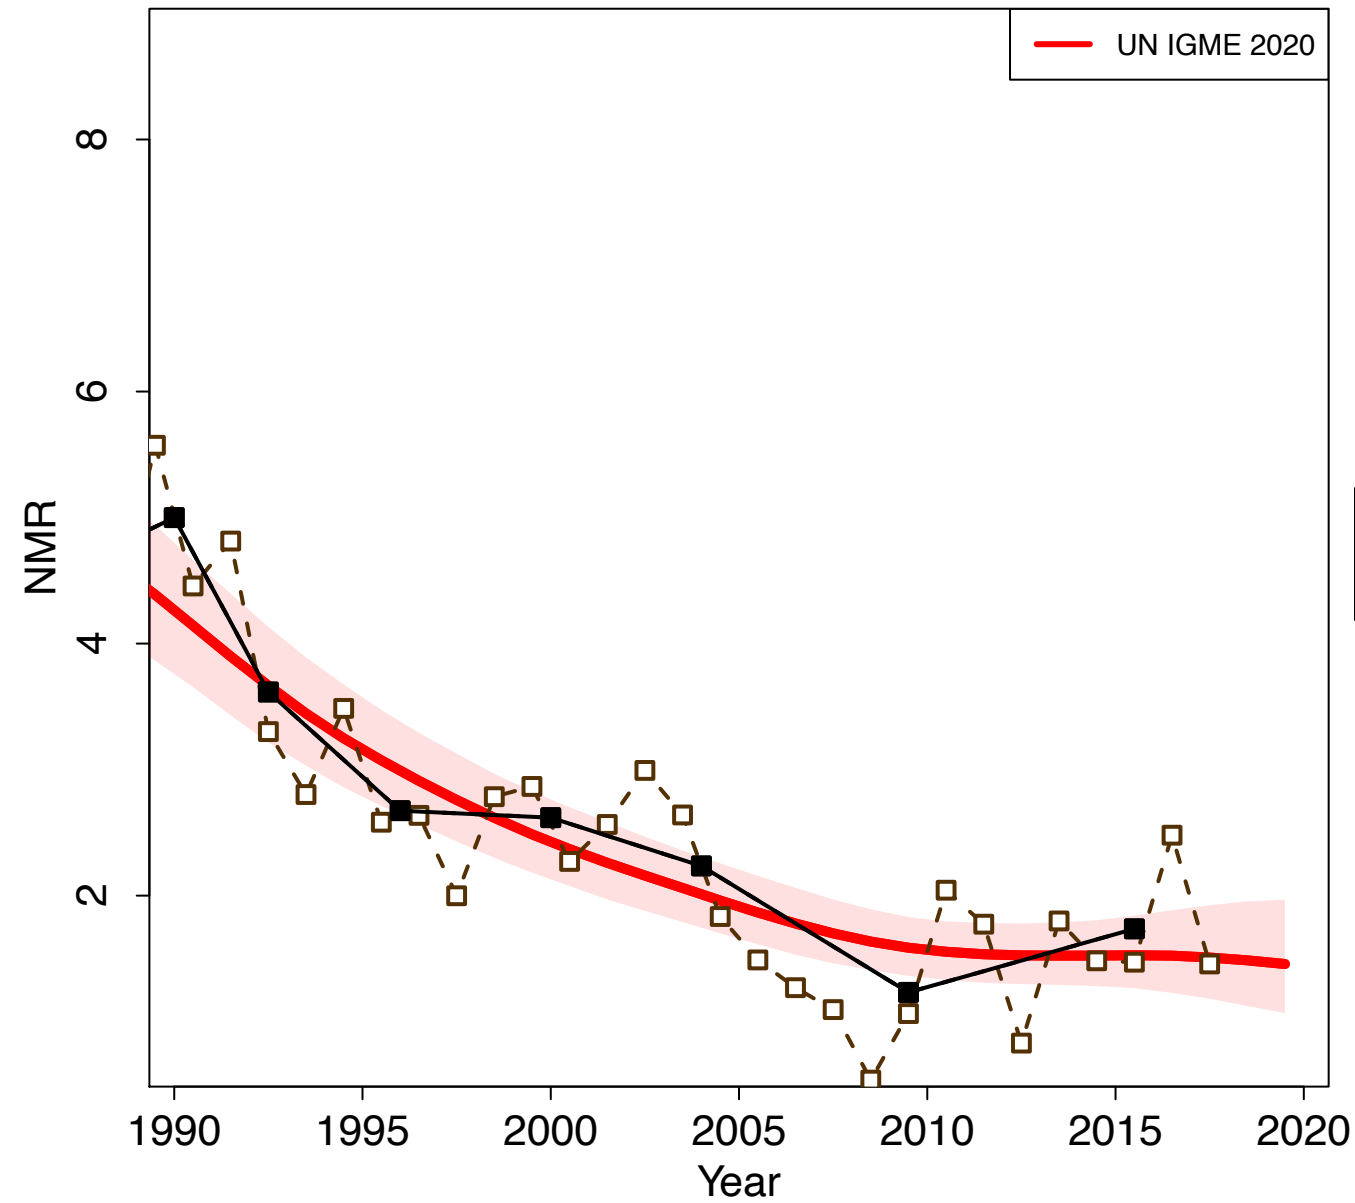

# Republic of North Macedonia

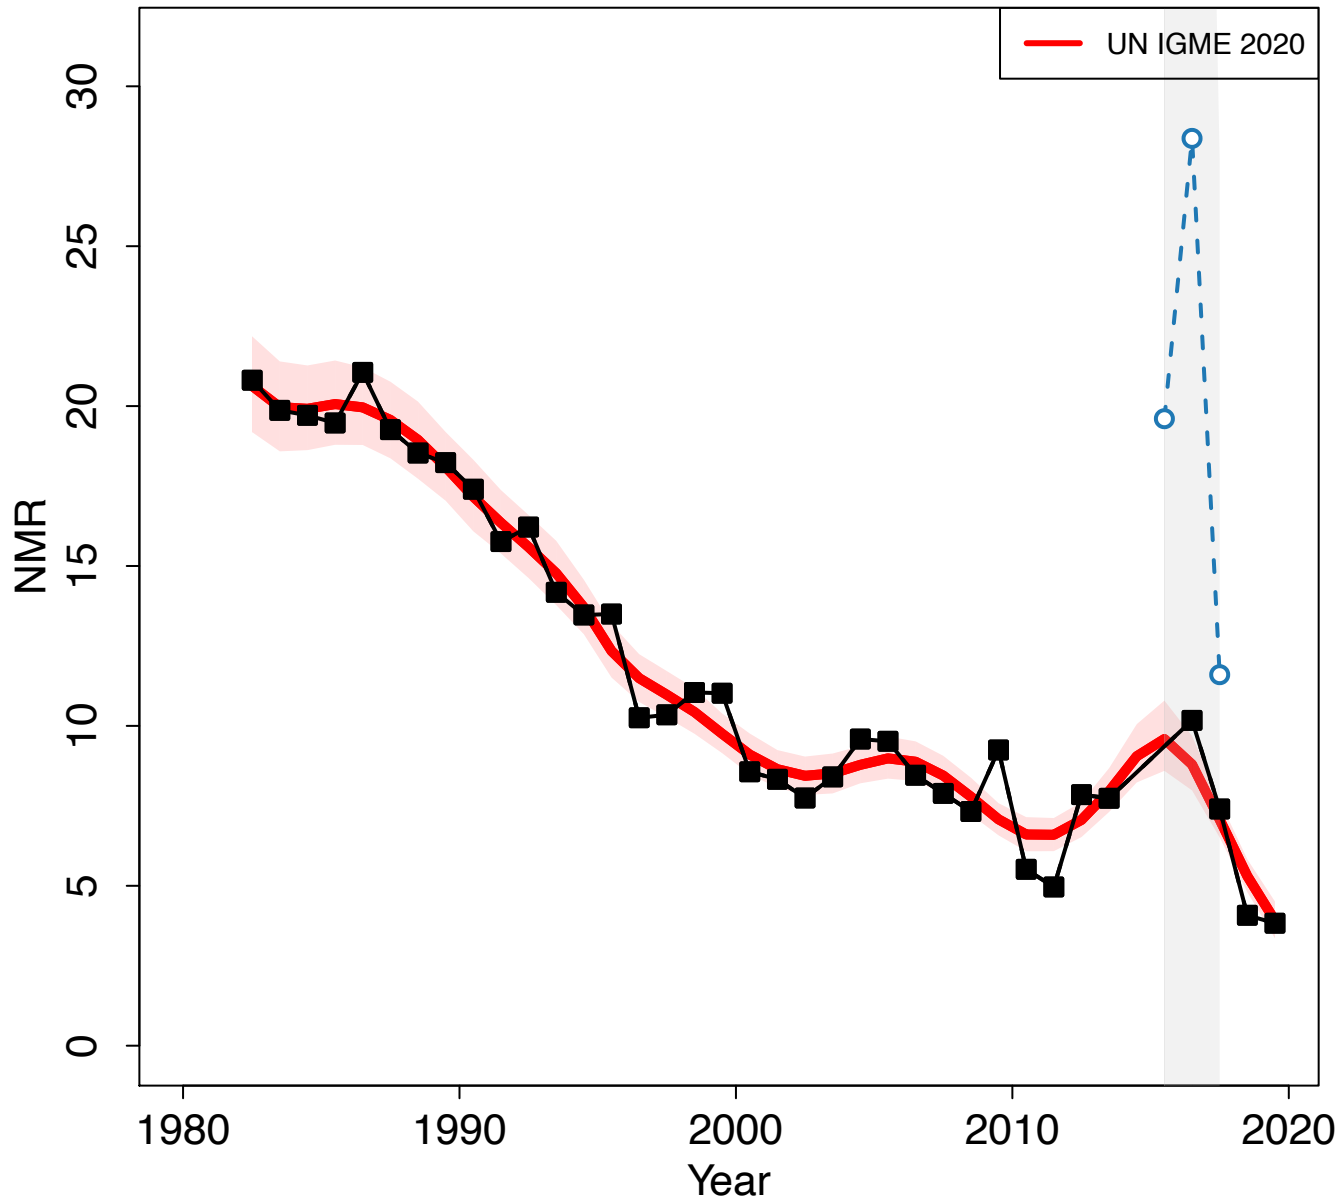

# Zoomed in

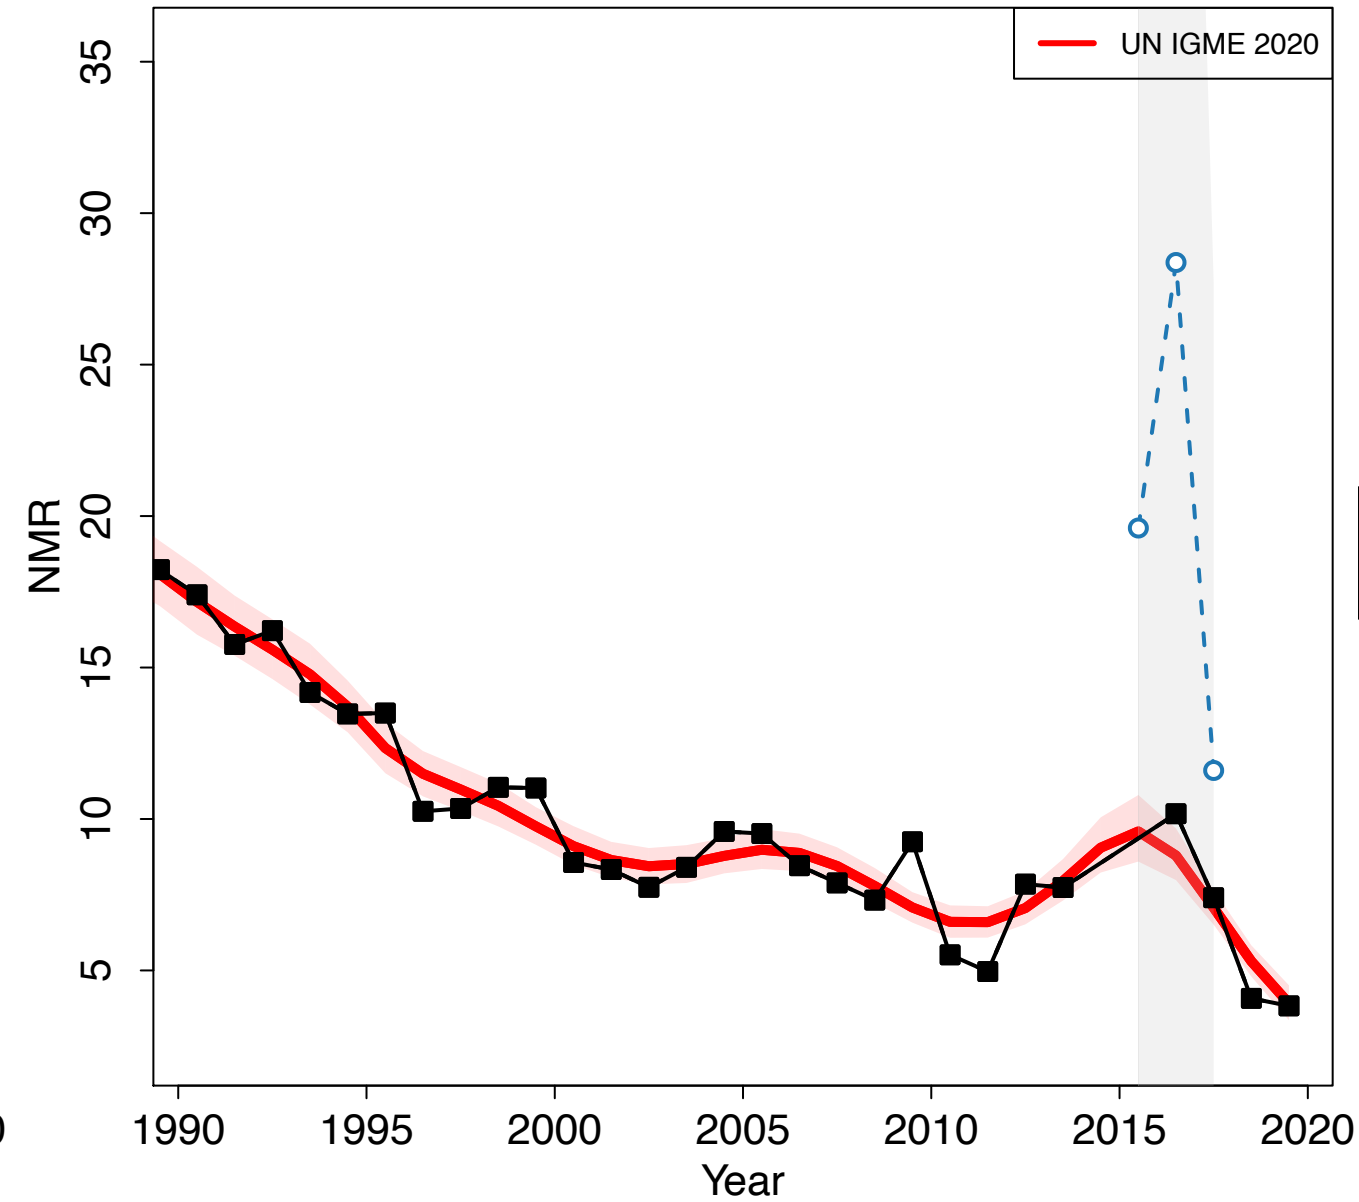

# Madagascar

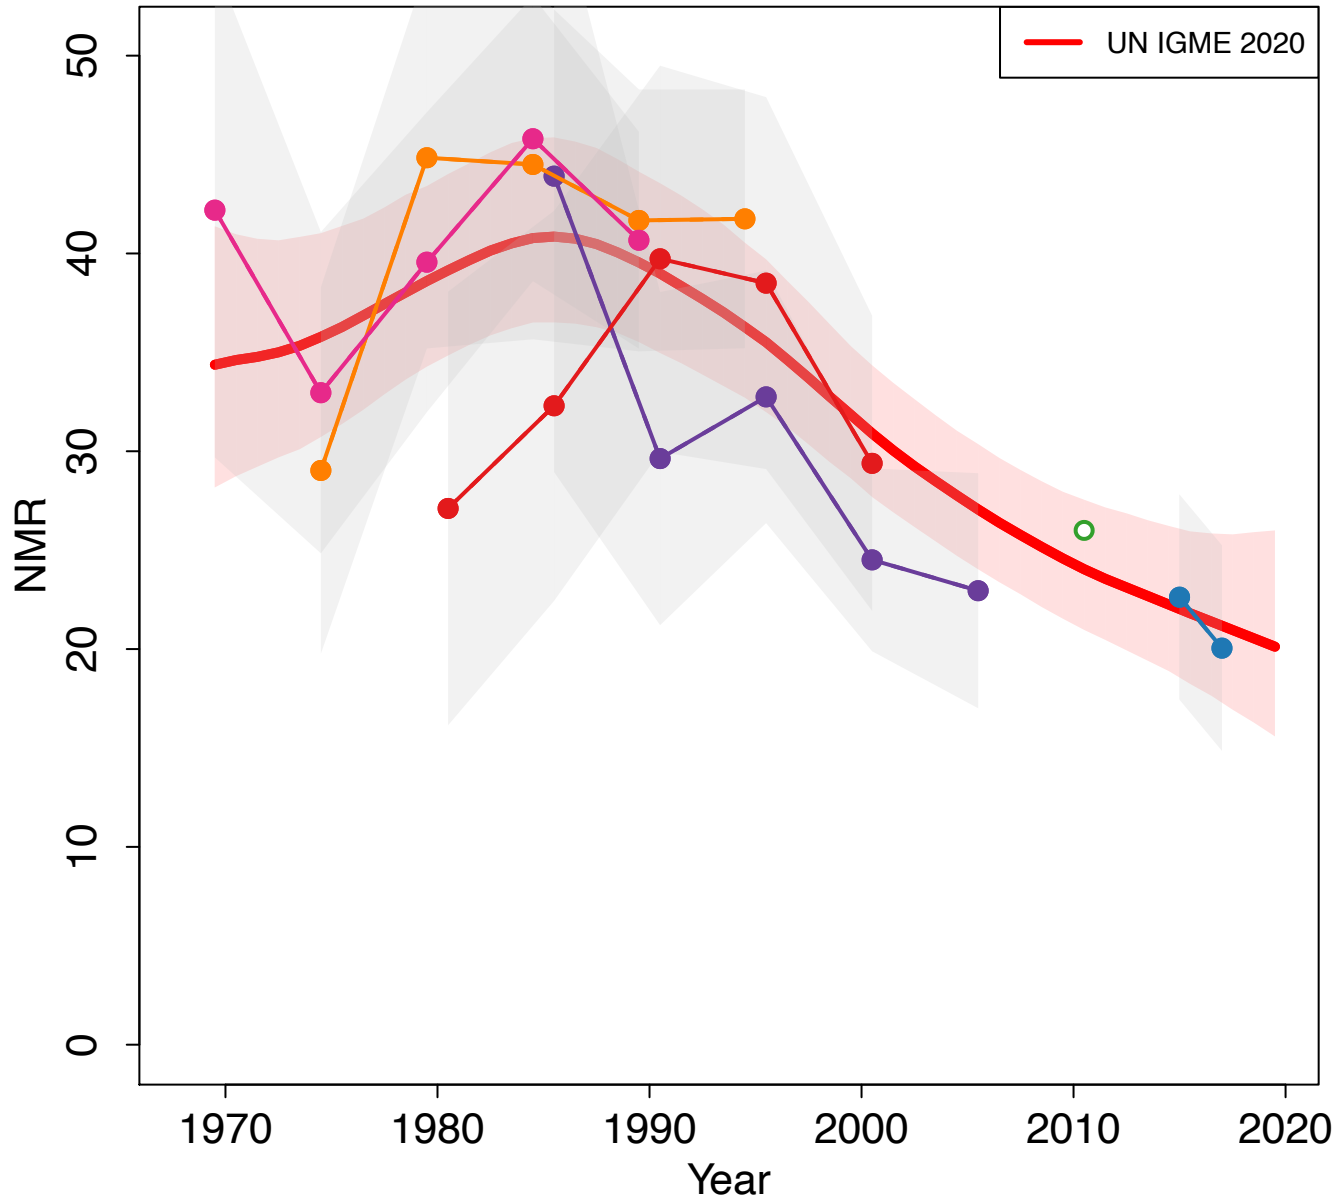

# Zoomed in

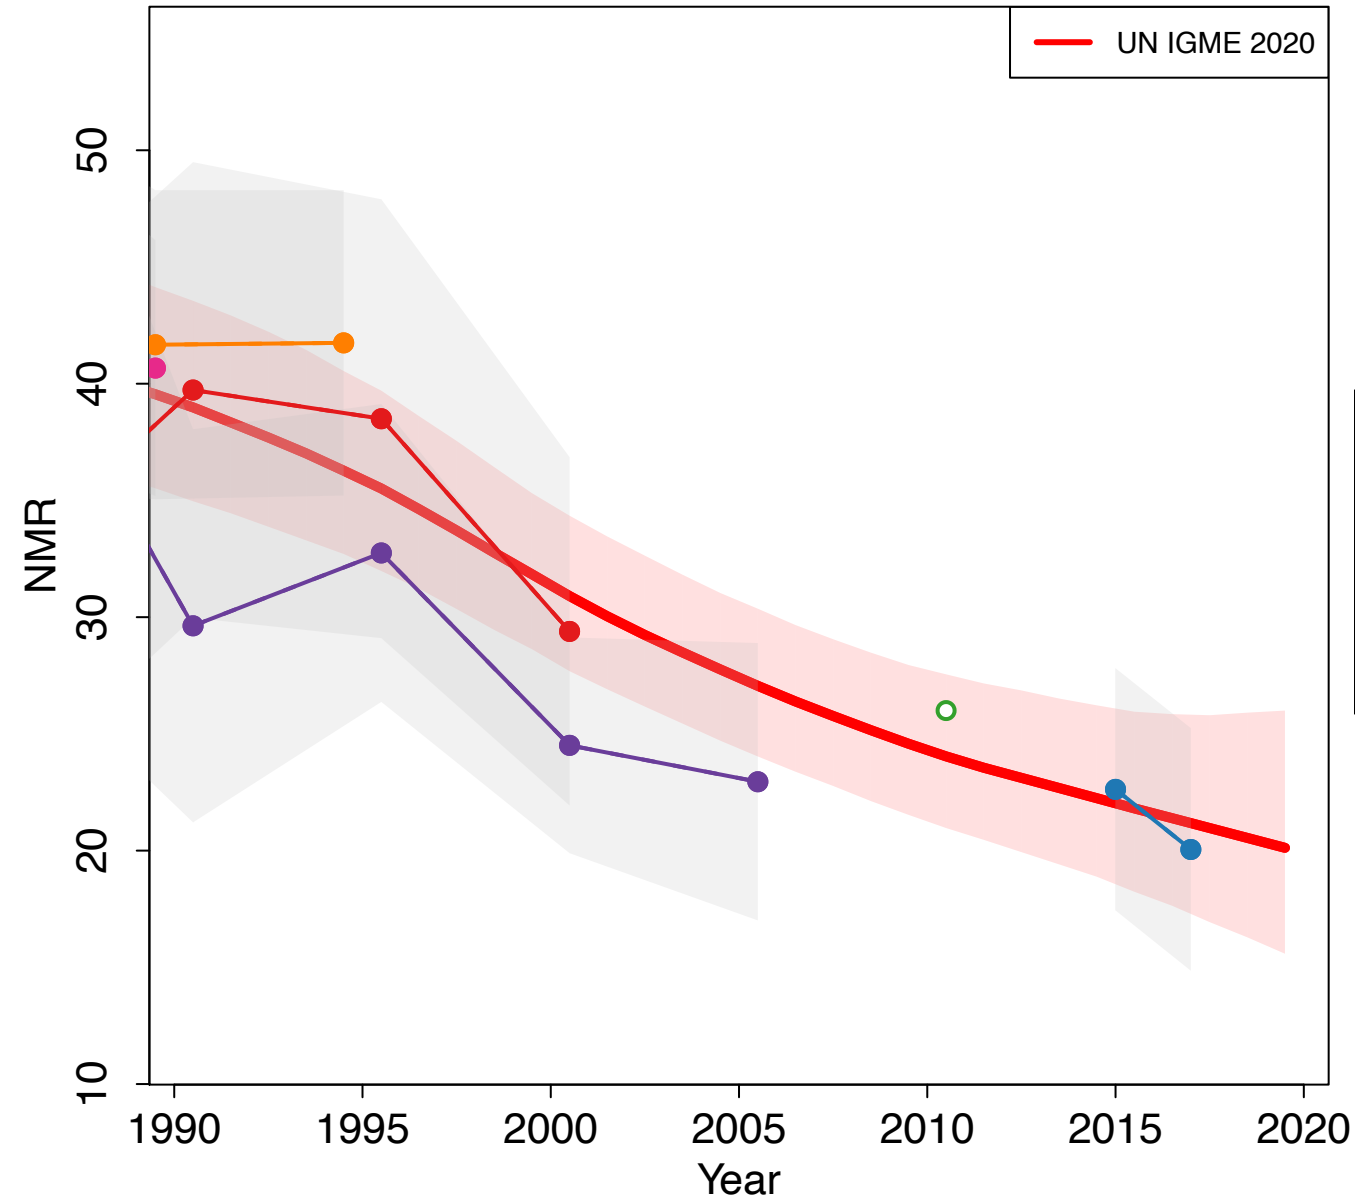

- Demographic and Health Survey 1992 (DHS)
- Demographic and Health Survey 1997 (DHS)
- Demographic and Health Survey 2003–2004 (DHS)
- Demographic and Health Survey 2008–2009 (DHS)
- National Survey on Monitoring the MDGs (ENSOMD) 2012–2013 (Others)
- Multiple Indicator Cluster Survey 2018 (MICS)

# Malawi

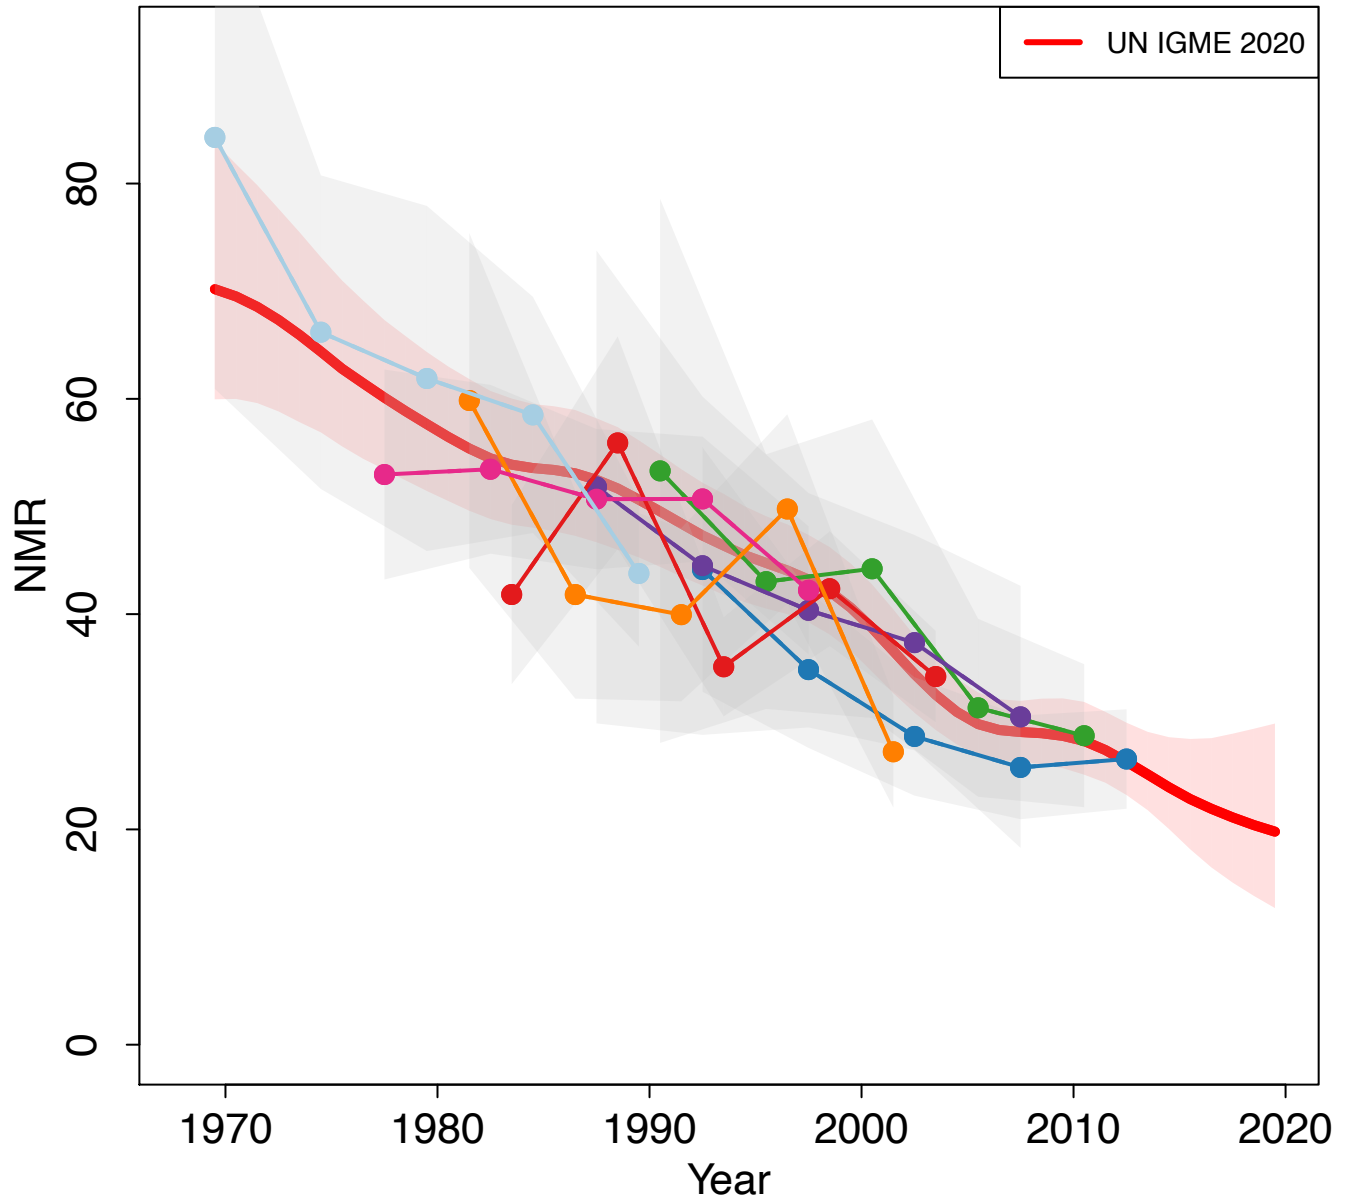

# Zoomed in

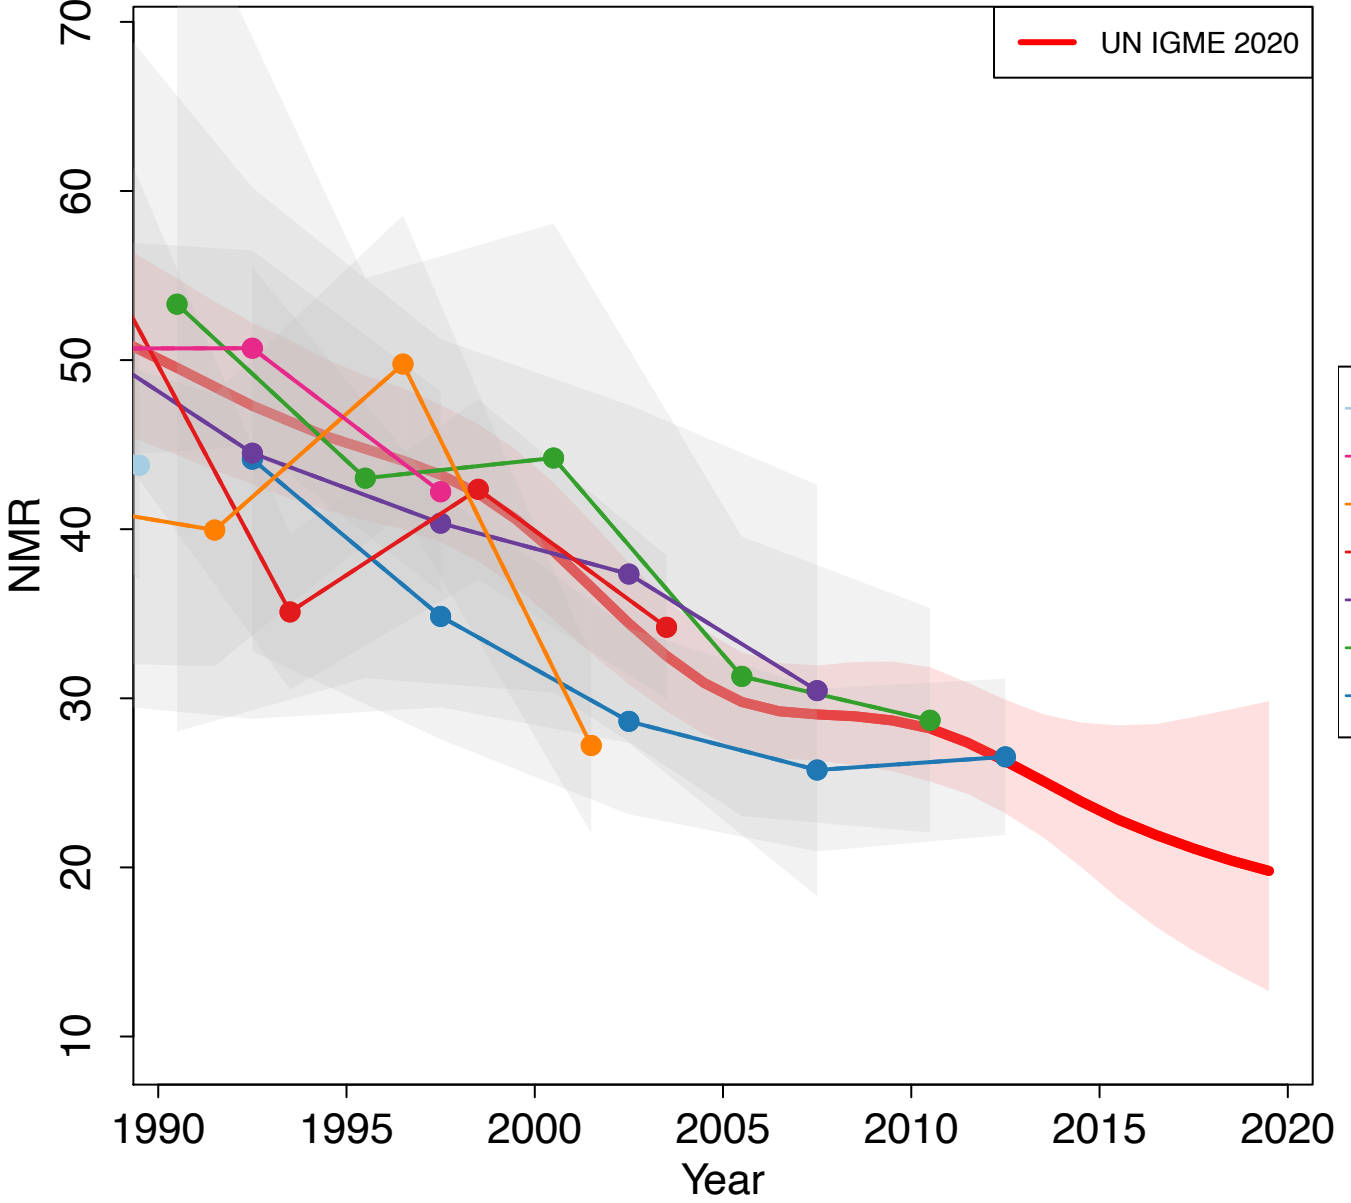

- Demographic and Health Survey 1992 (DHS)
- Demographic and Health Survey 2000 (DHS)
- Demographic and Health Survey 2004 (DHS)
- Multiple Indicator Cluster Survey 2006 (MICS)
- Demographic and Health Survey 2010 (DHS)
- MDG Endline Survey 2013–2014 (MICS)
- Demographic and Health Survey 2015–2016 (DHS)

# Malaysia

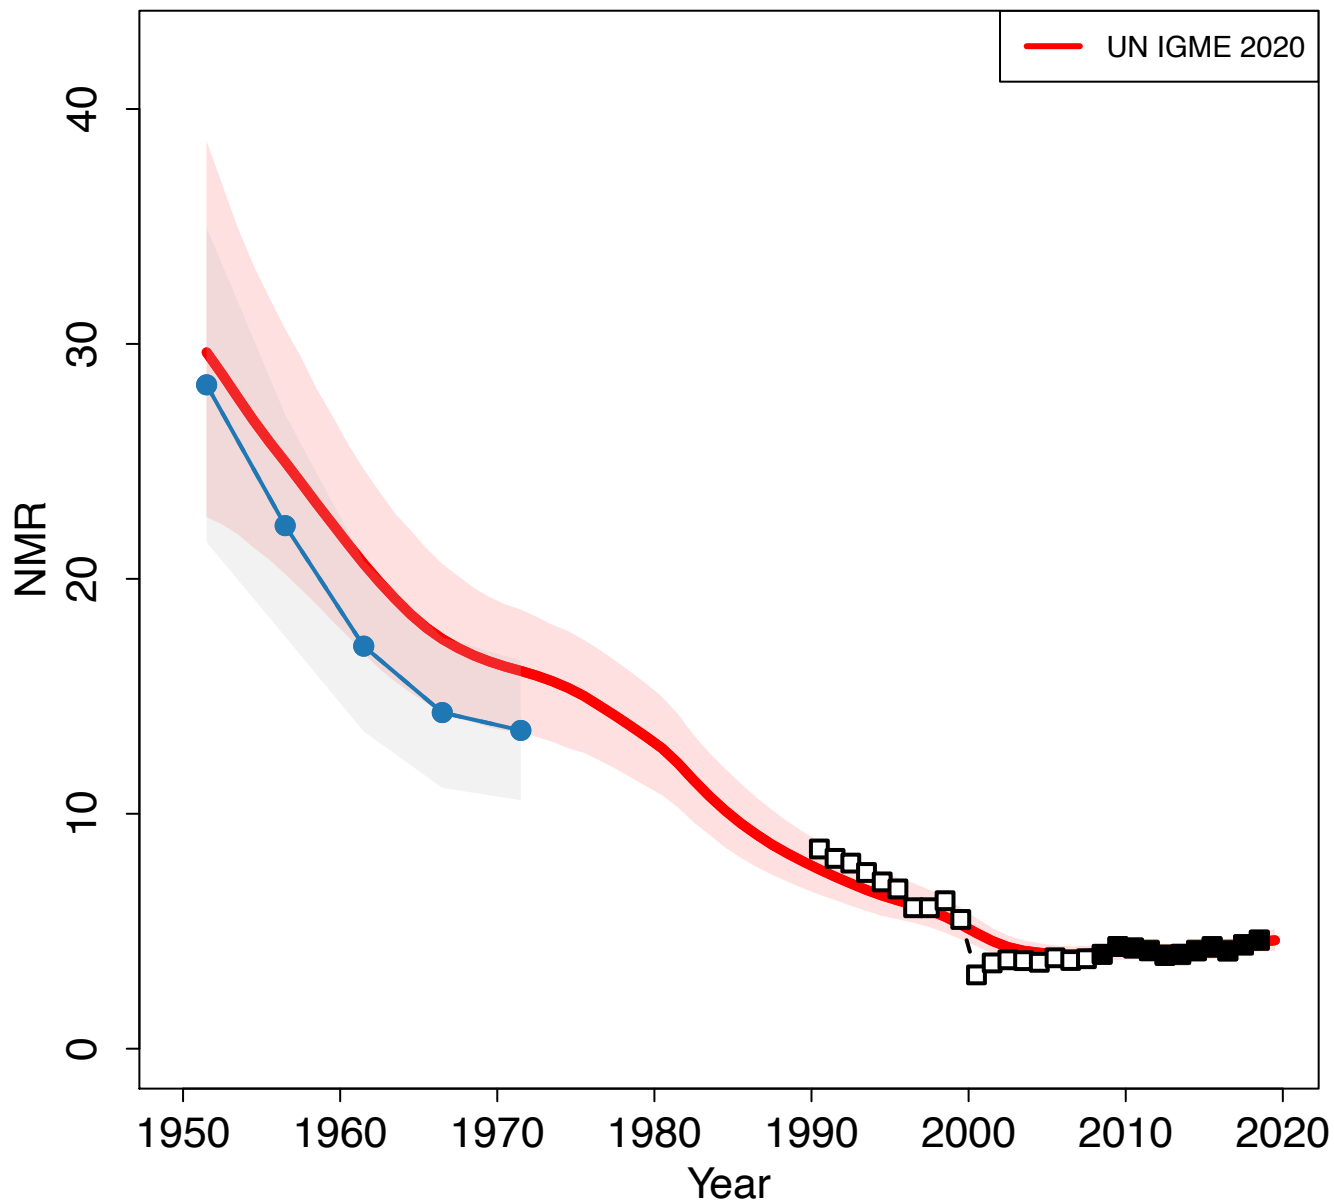

# Zoomed in

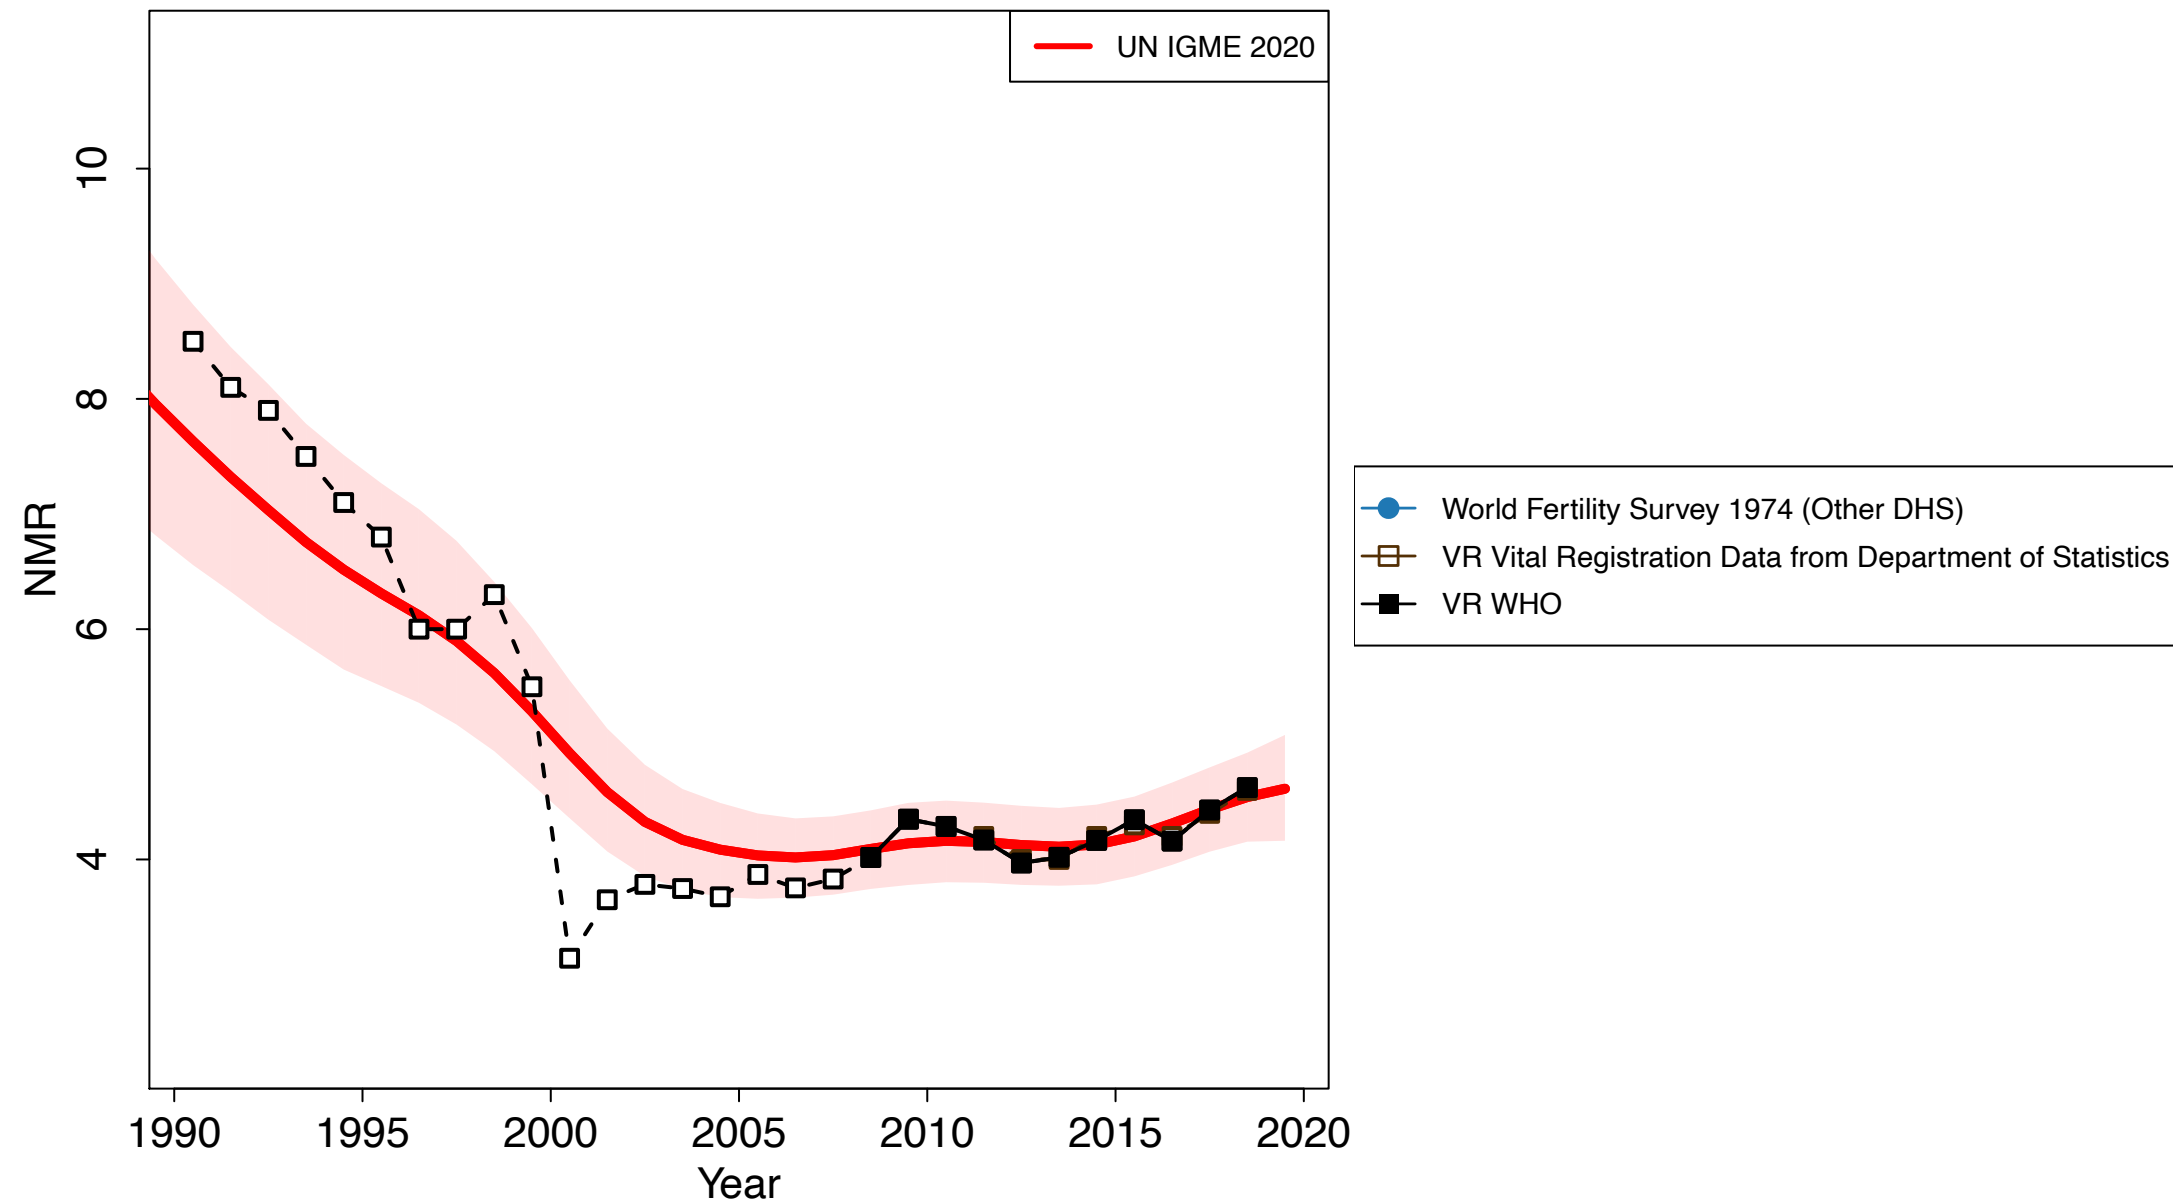

# Maldives

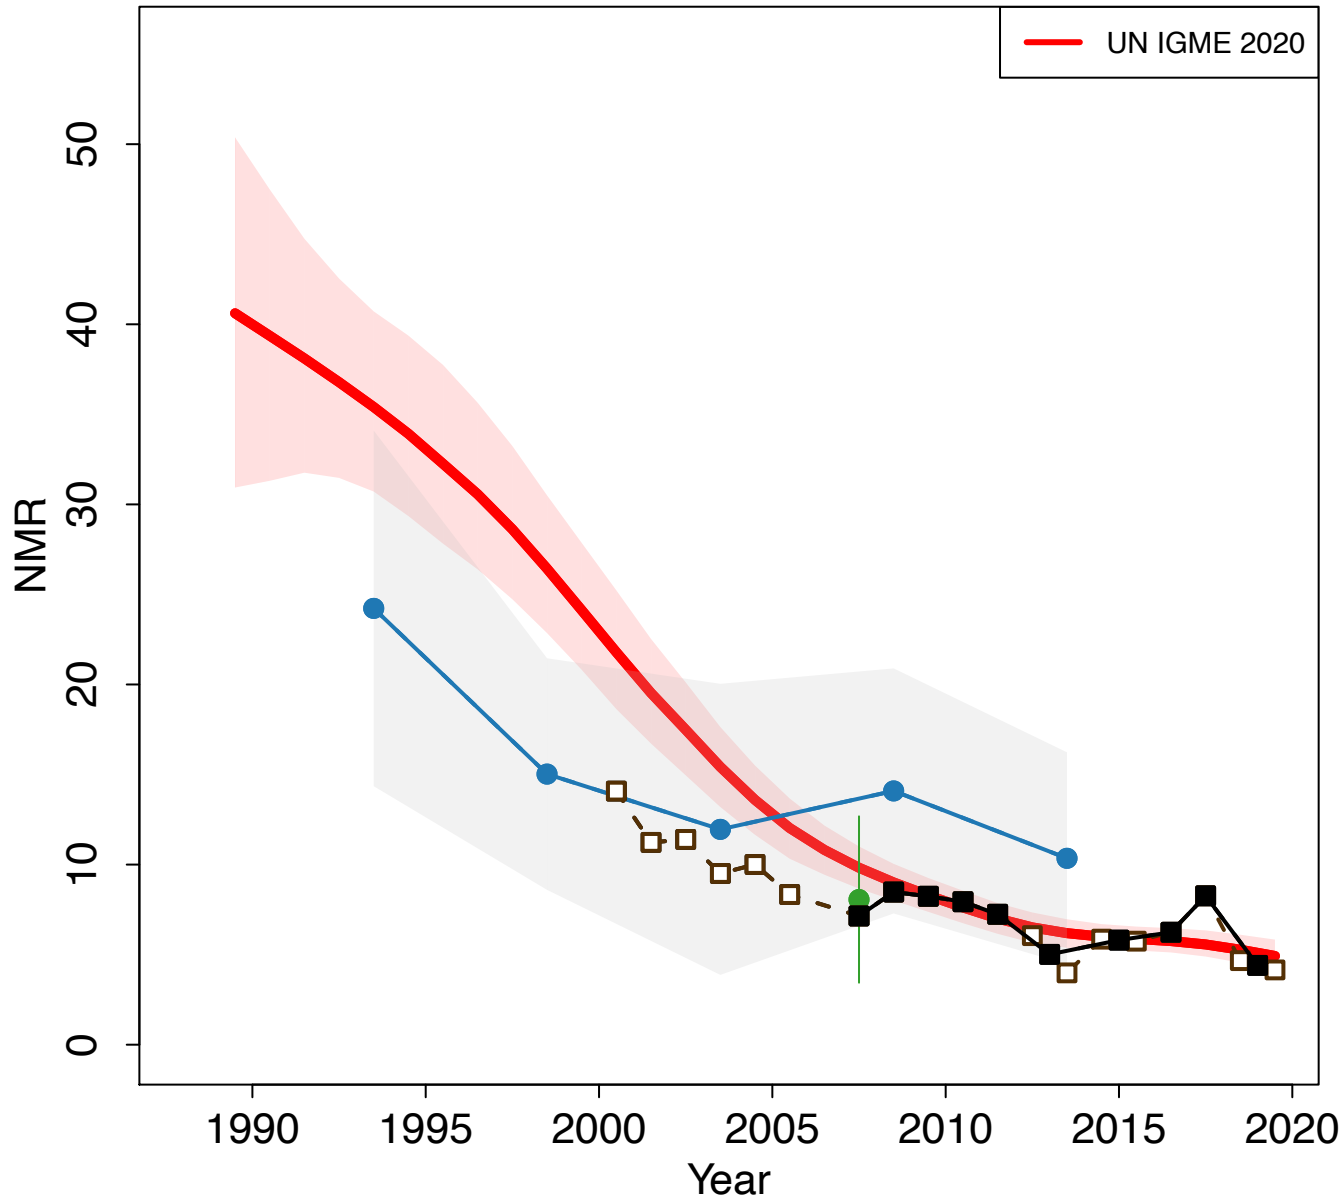

# Zoomed in

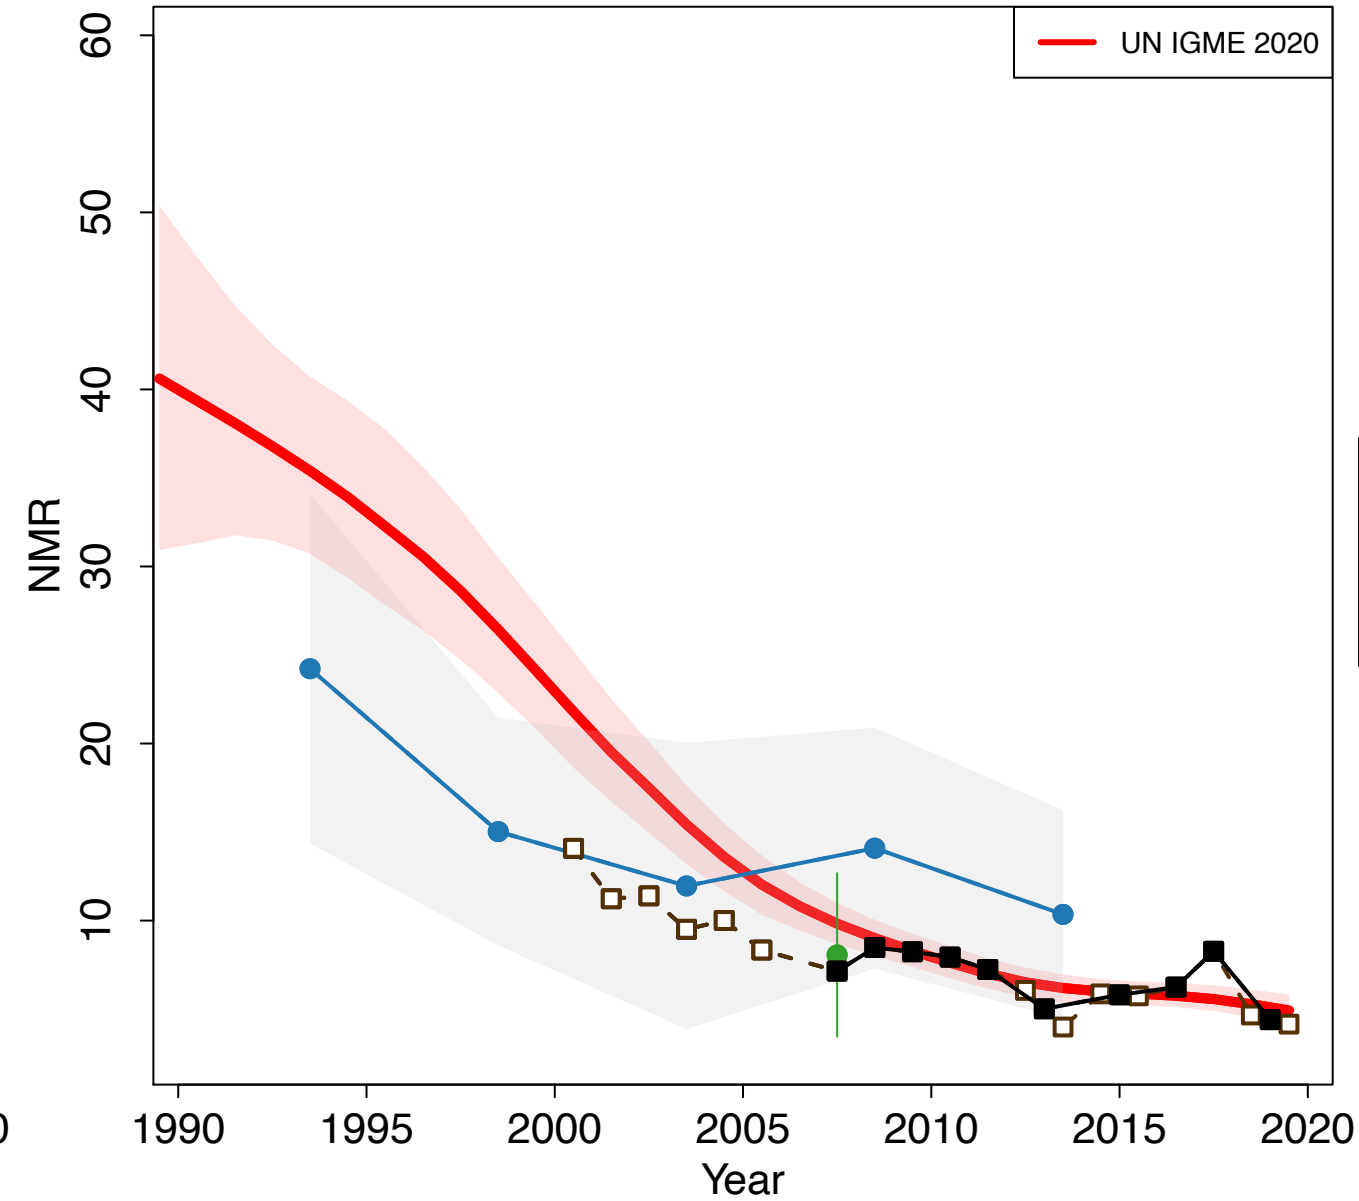



# Mali

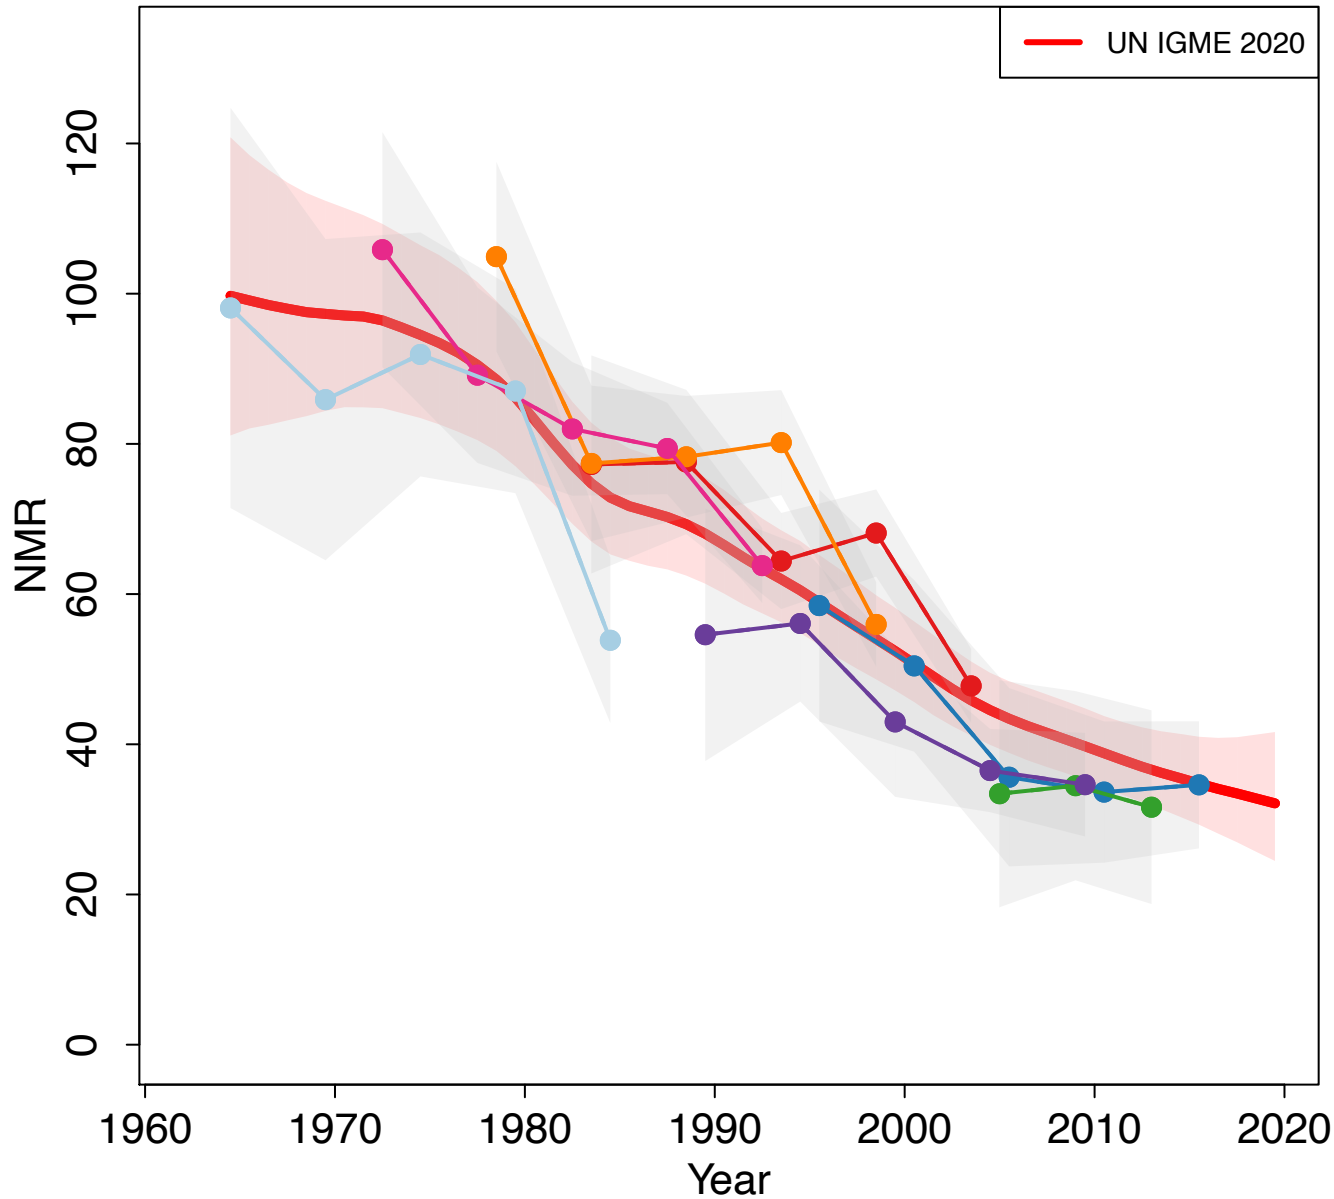

# Zoomed in

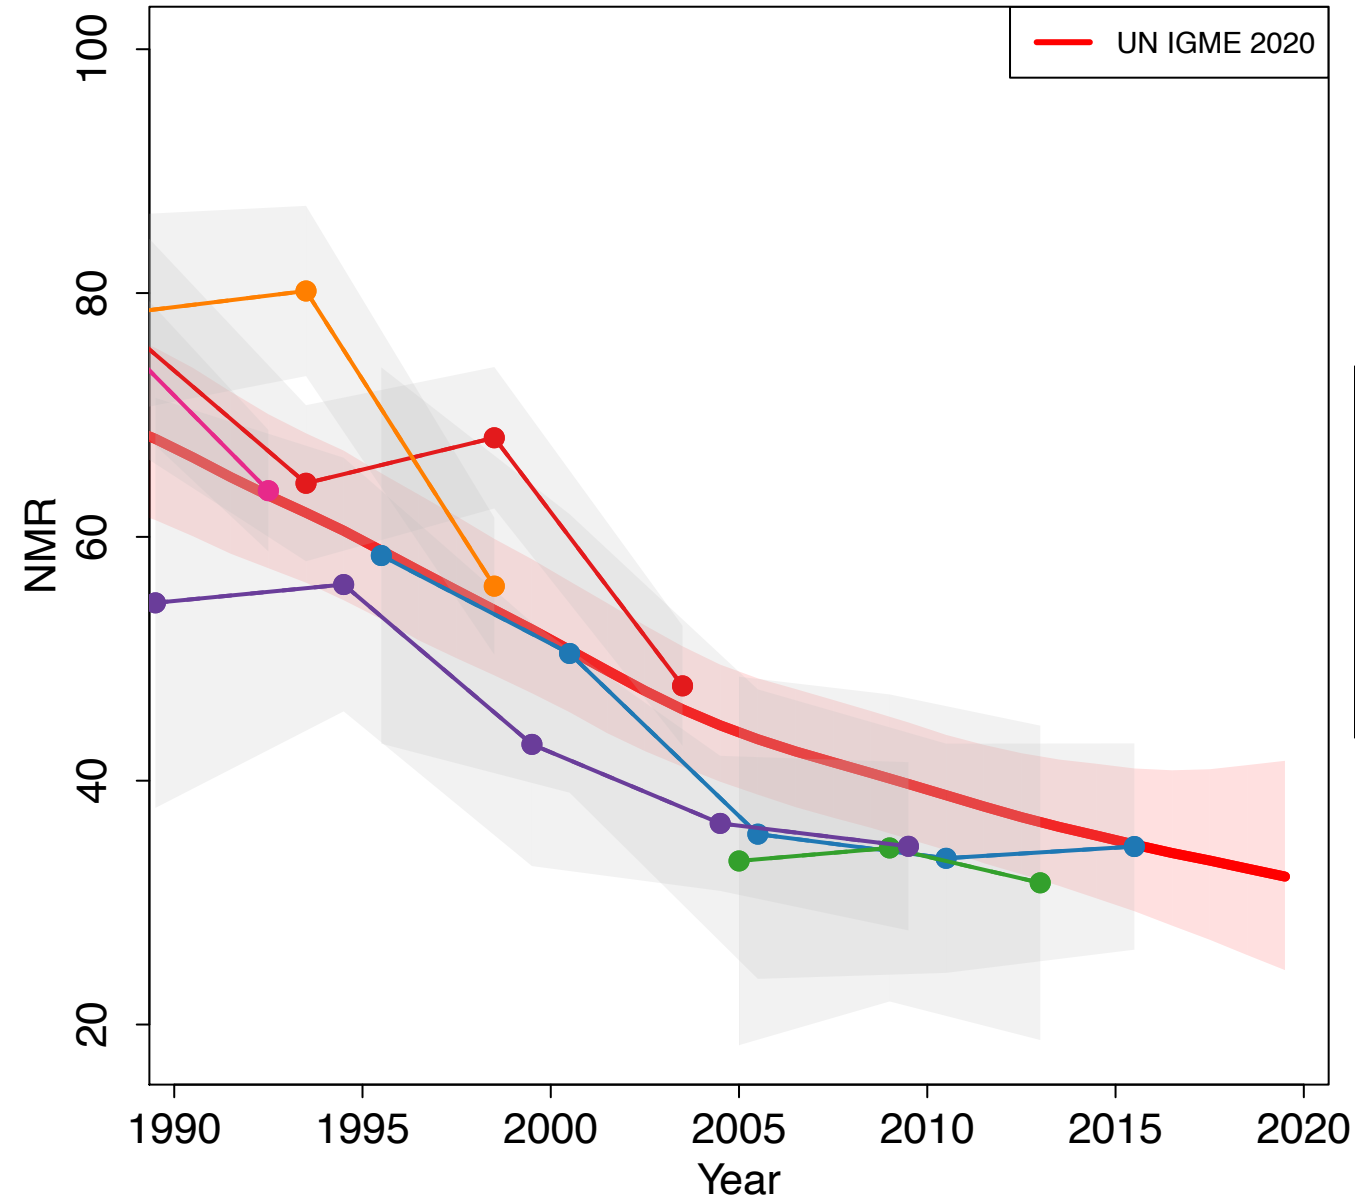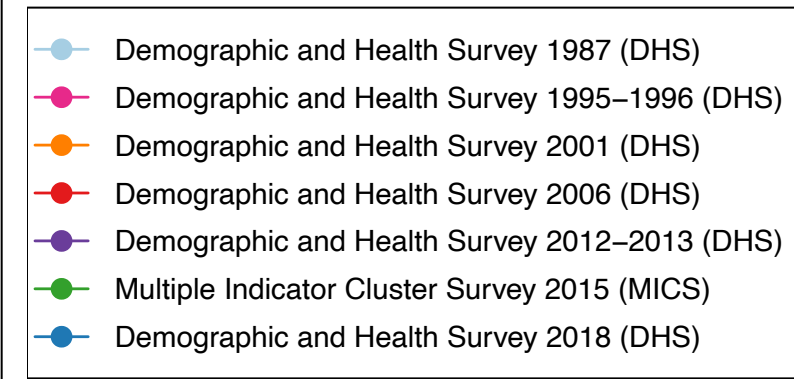

# Malta

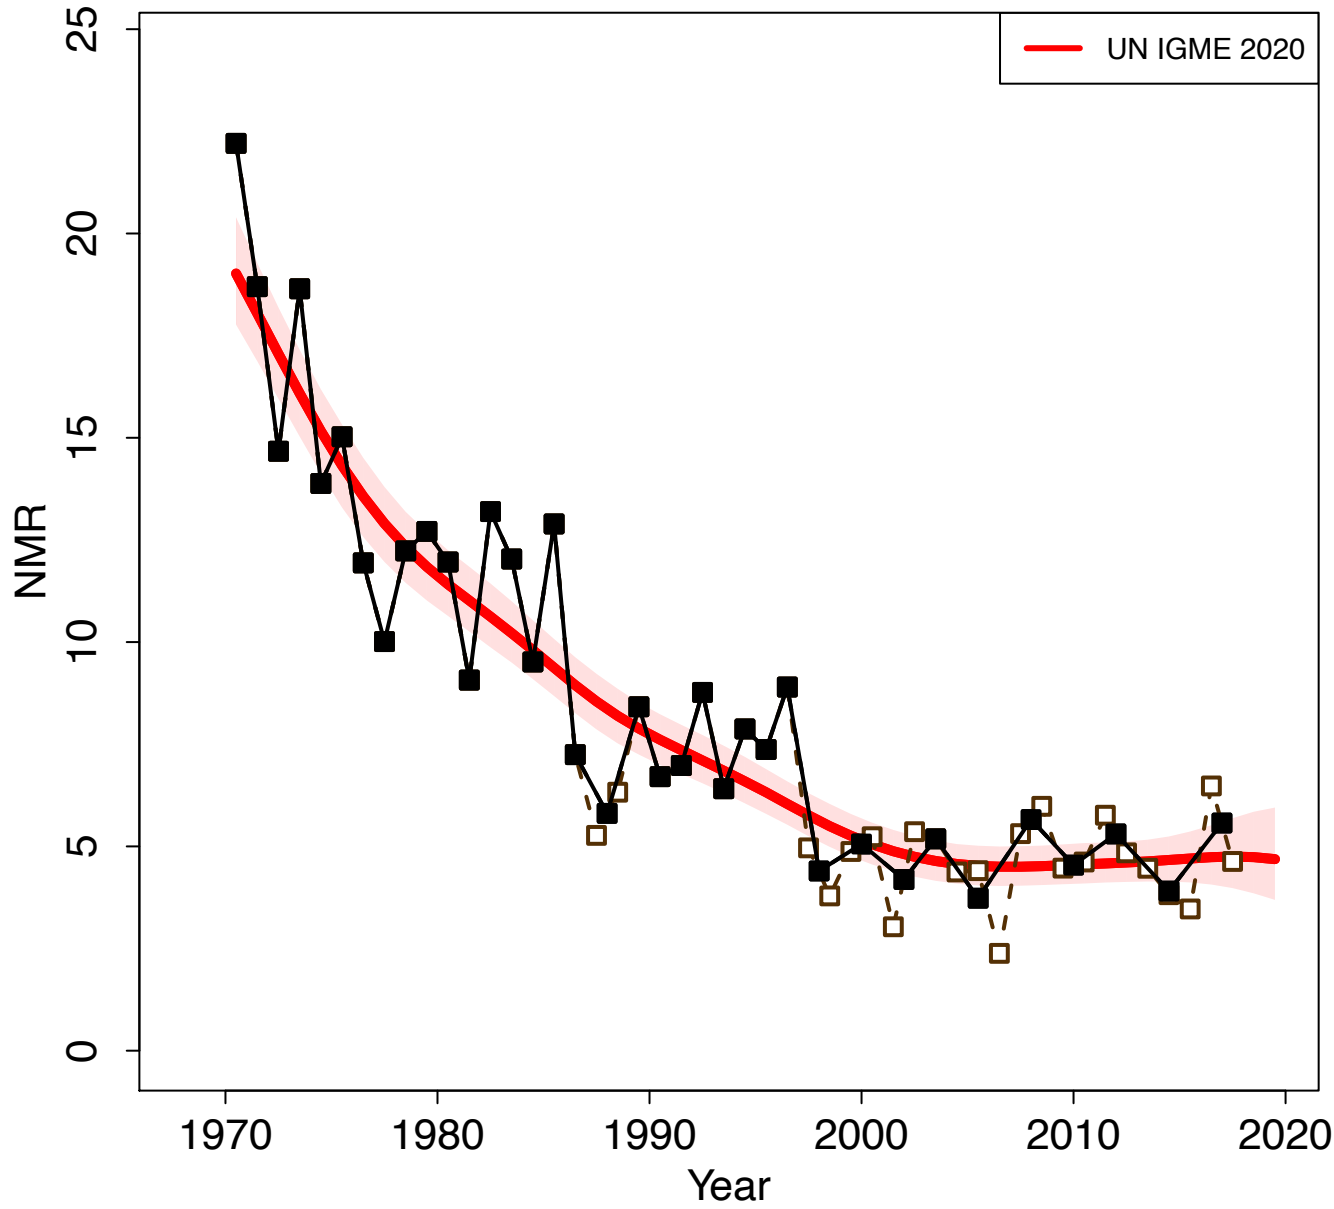

# Zoomed in

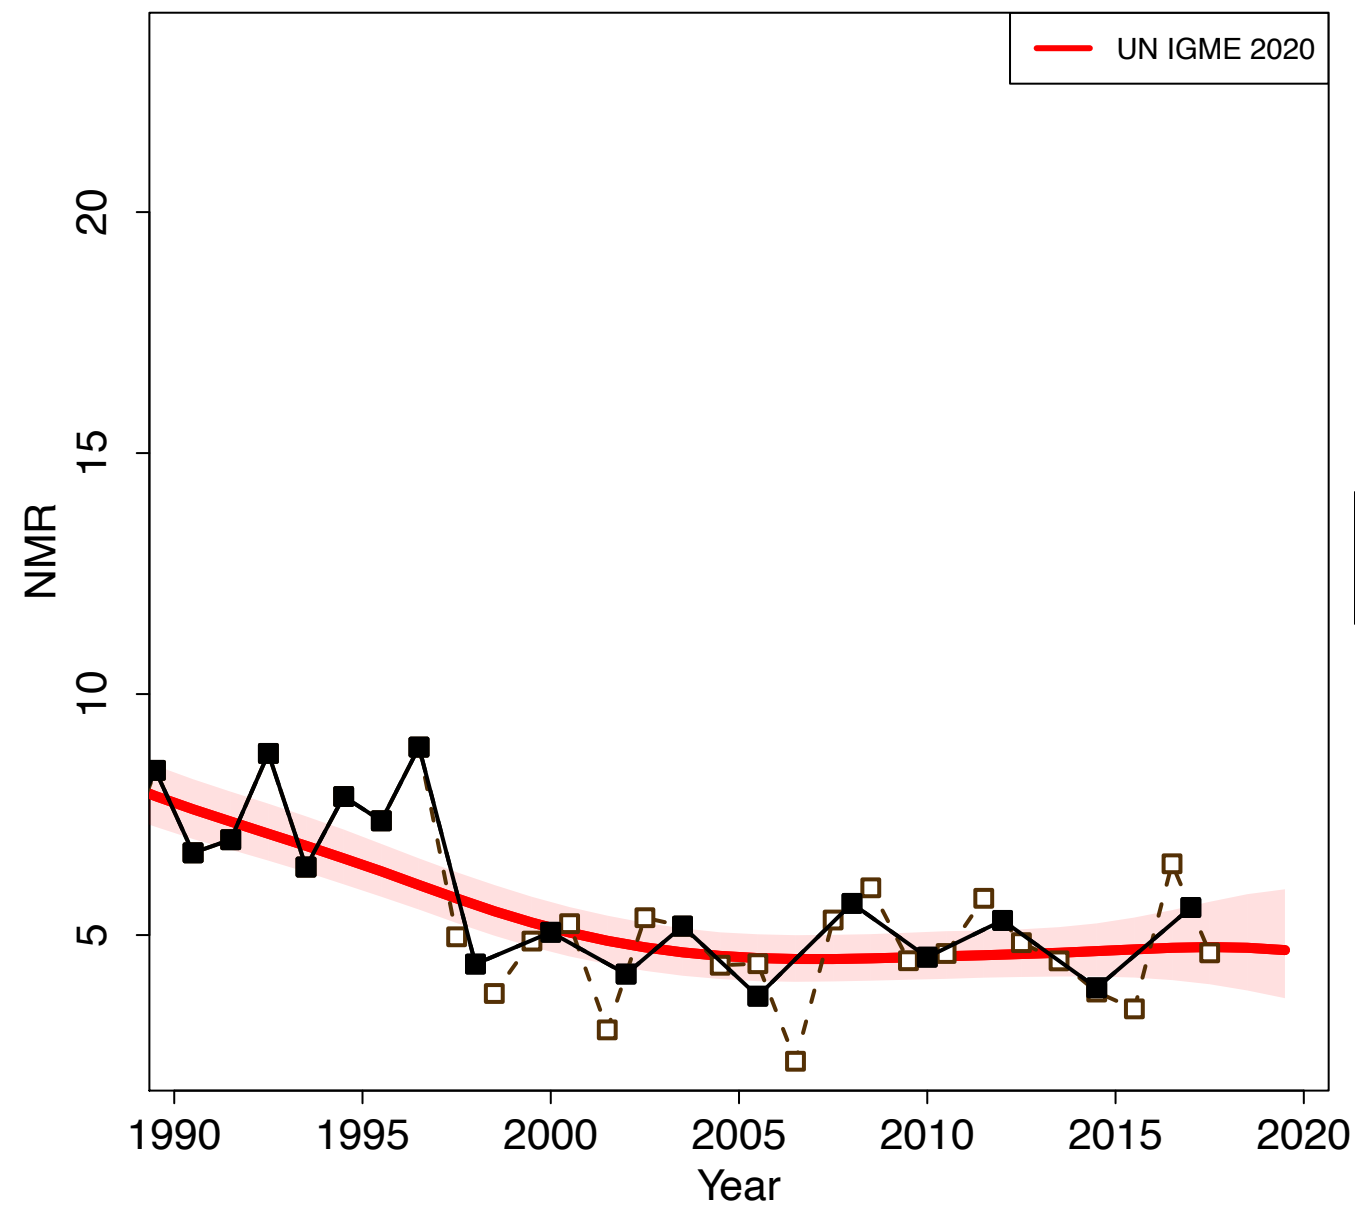

# Marshall Islands

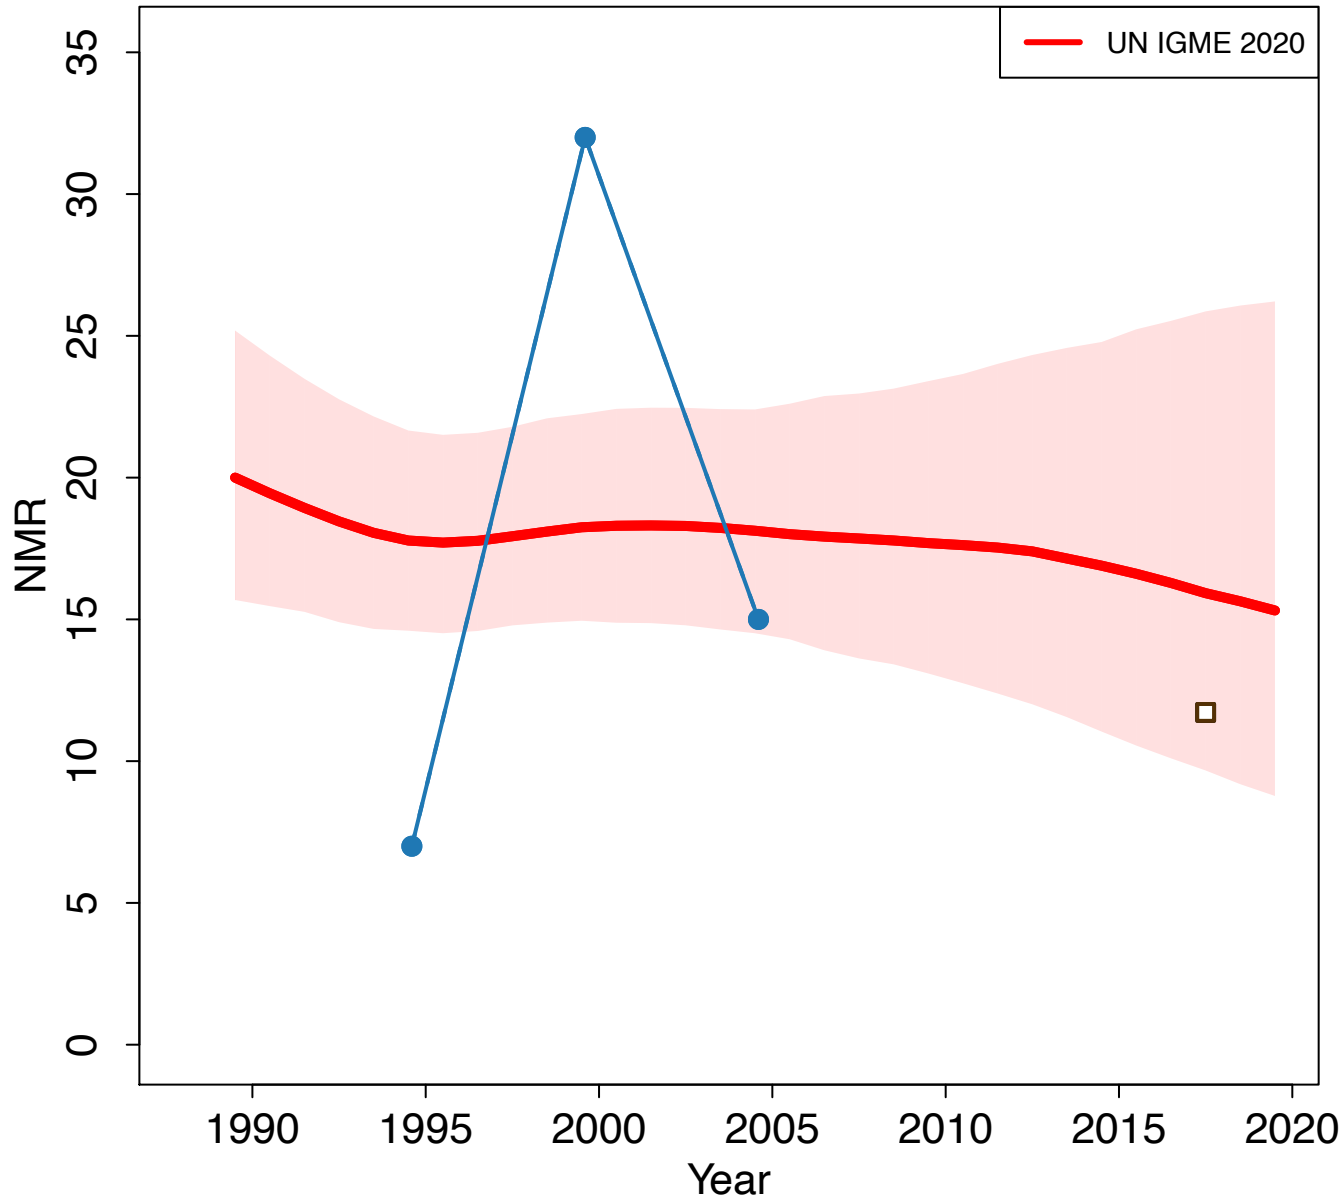

# Zoomed in

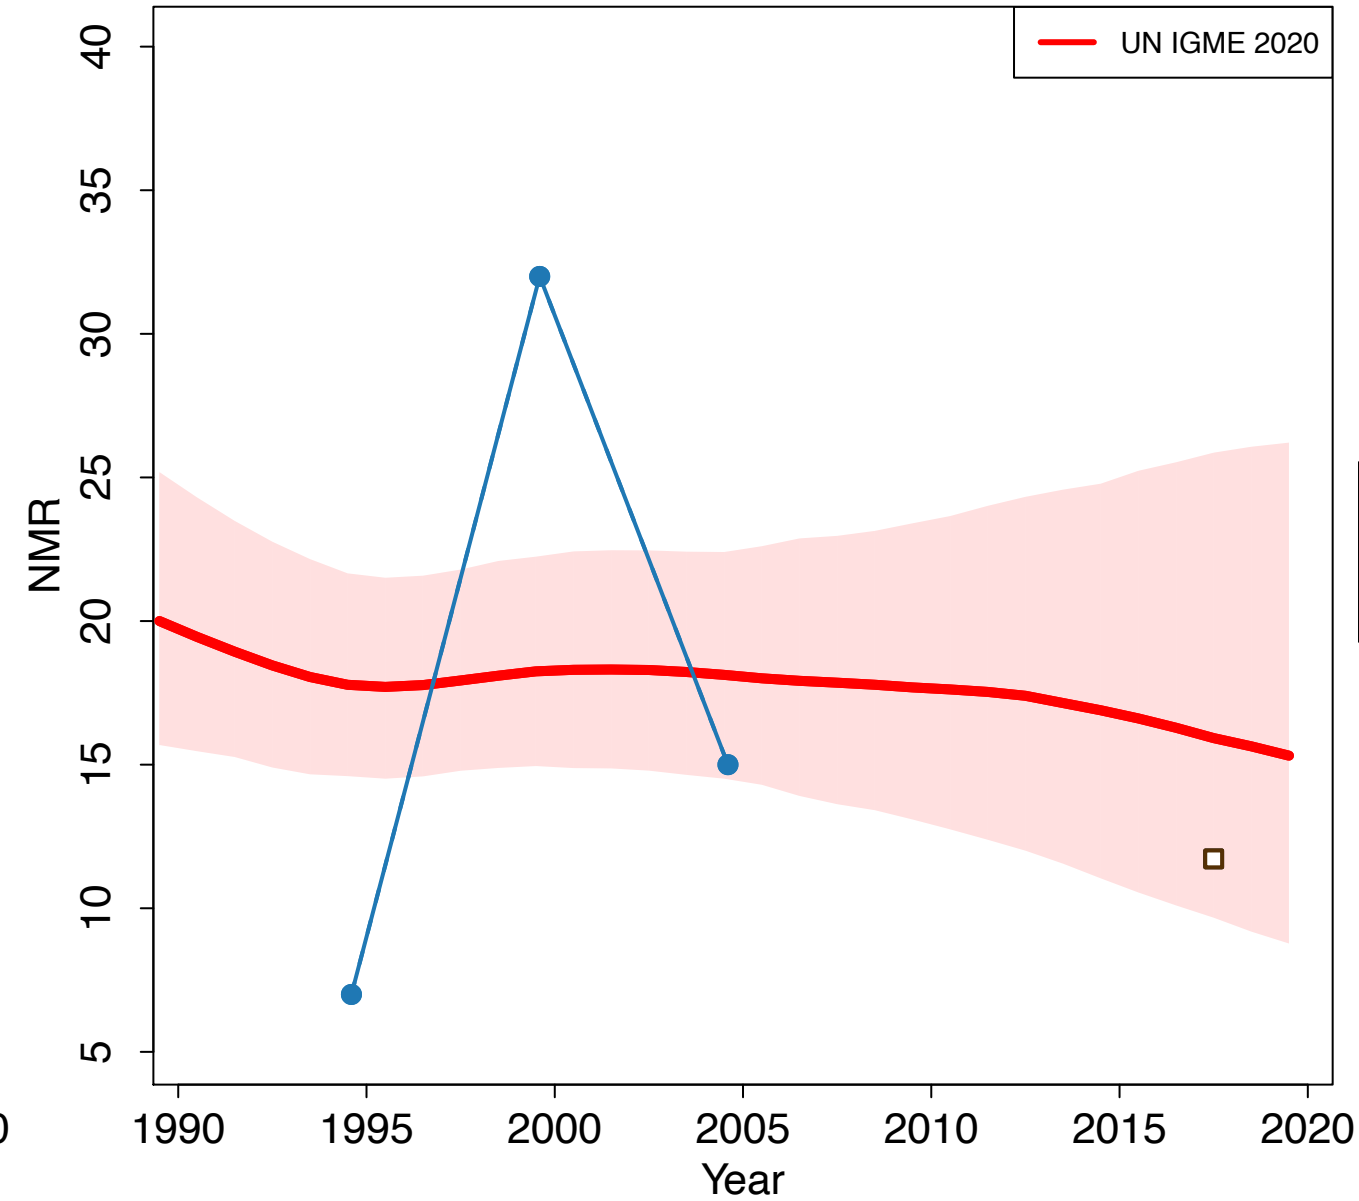

# Mauritania

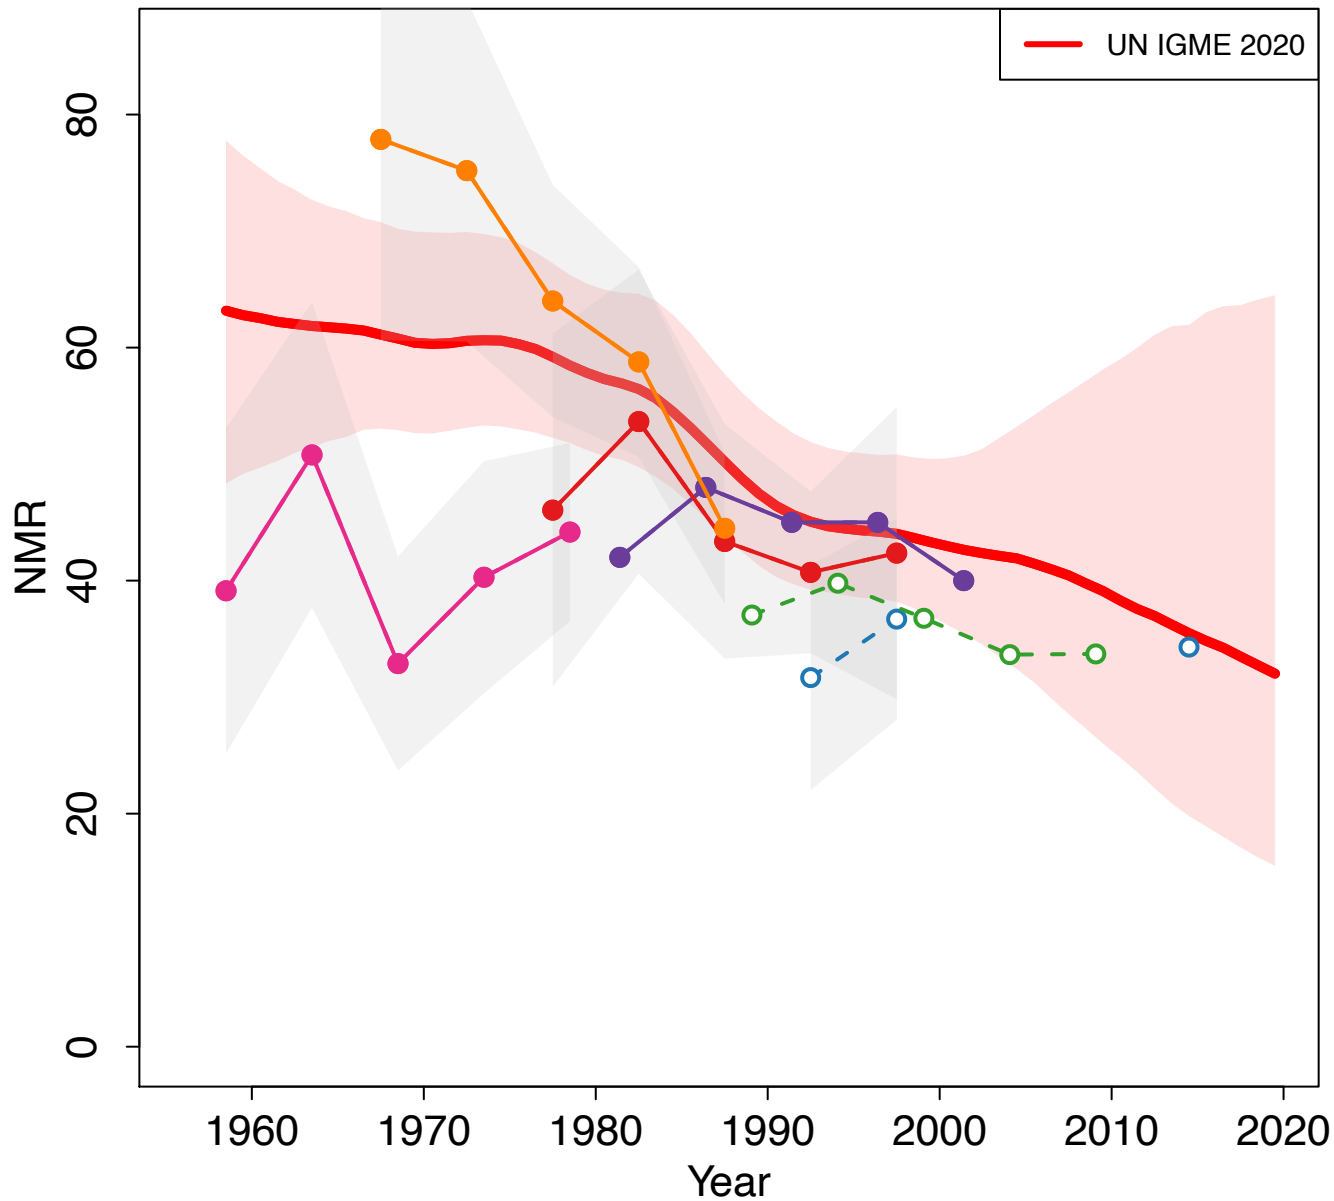

# Zoomed in

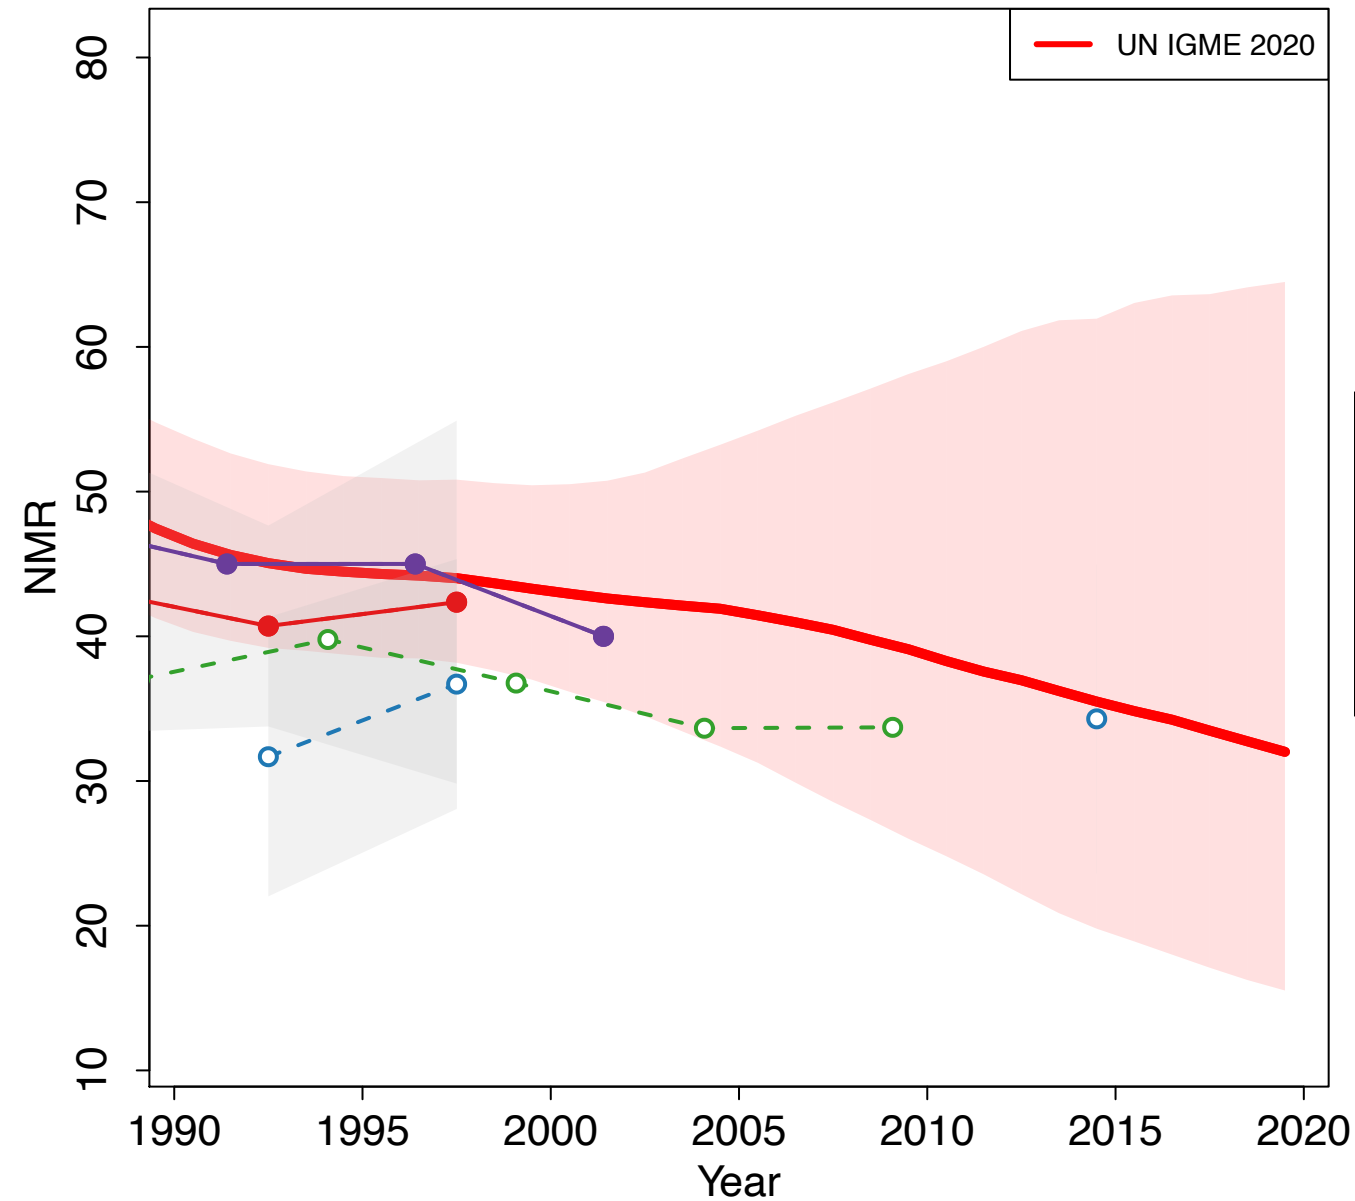

- World Fertility Survey 1981-1982 (Other DHS)
- PAPCHILD Maternal and Child Health Survey 1990 (Others)
- Demographic and Health Survey 2001 (DHS)
- EMIP survey 2003-2004 (Others)
- Multiple Indicator Cluster Survey 2011 (MICS)
- Multiple Indicator Cluster Survey 2015 (MICS)

# Mauritius

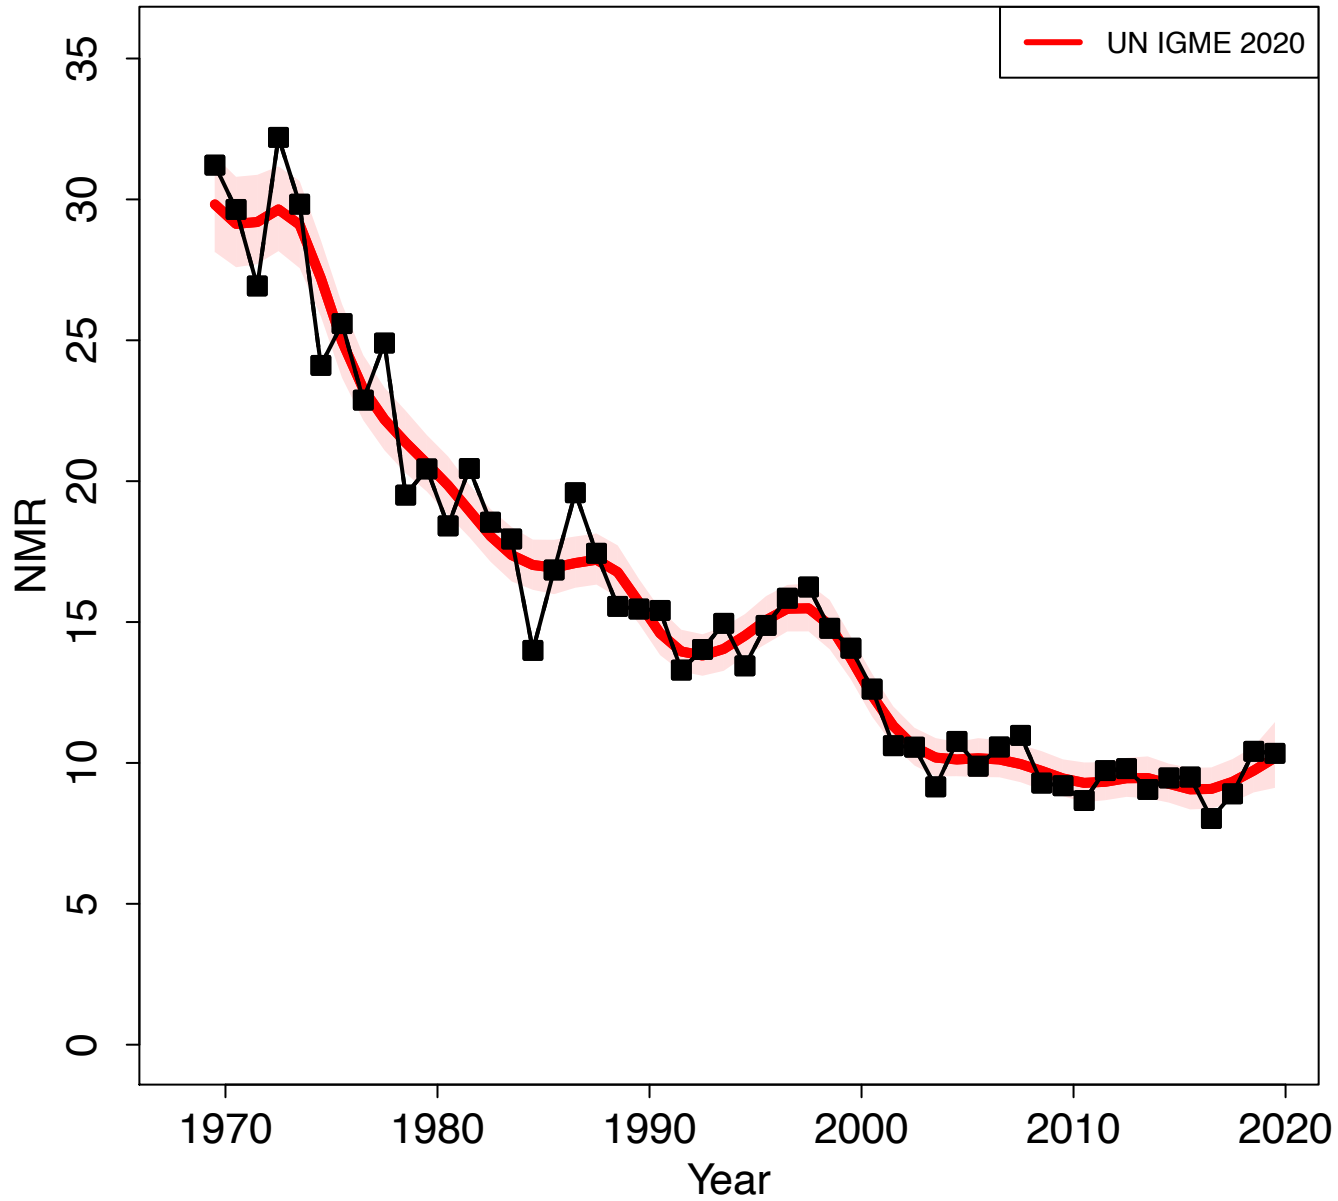

# Zoomed in

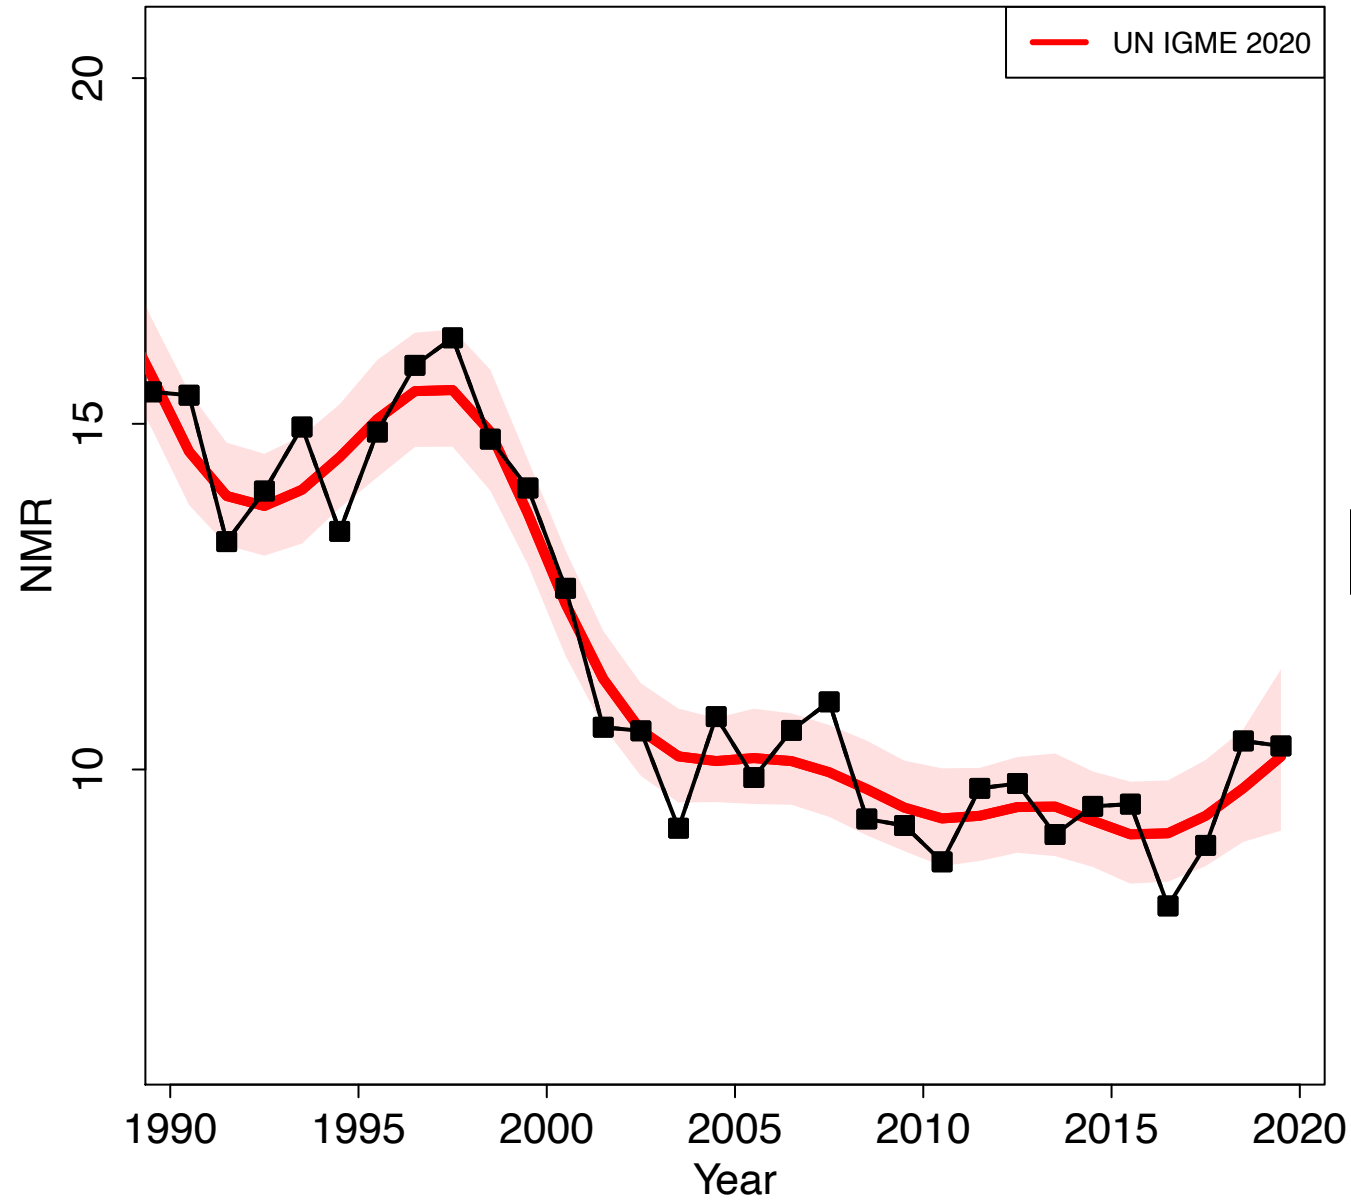

# Mexico

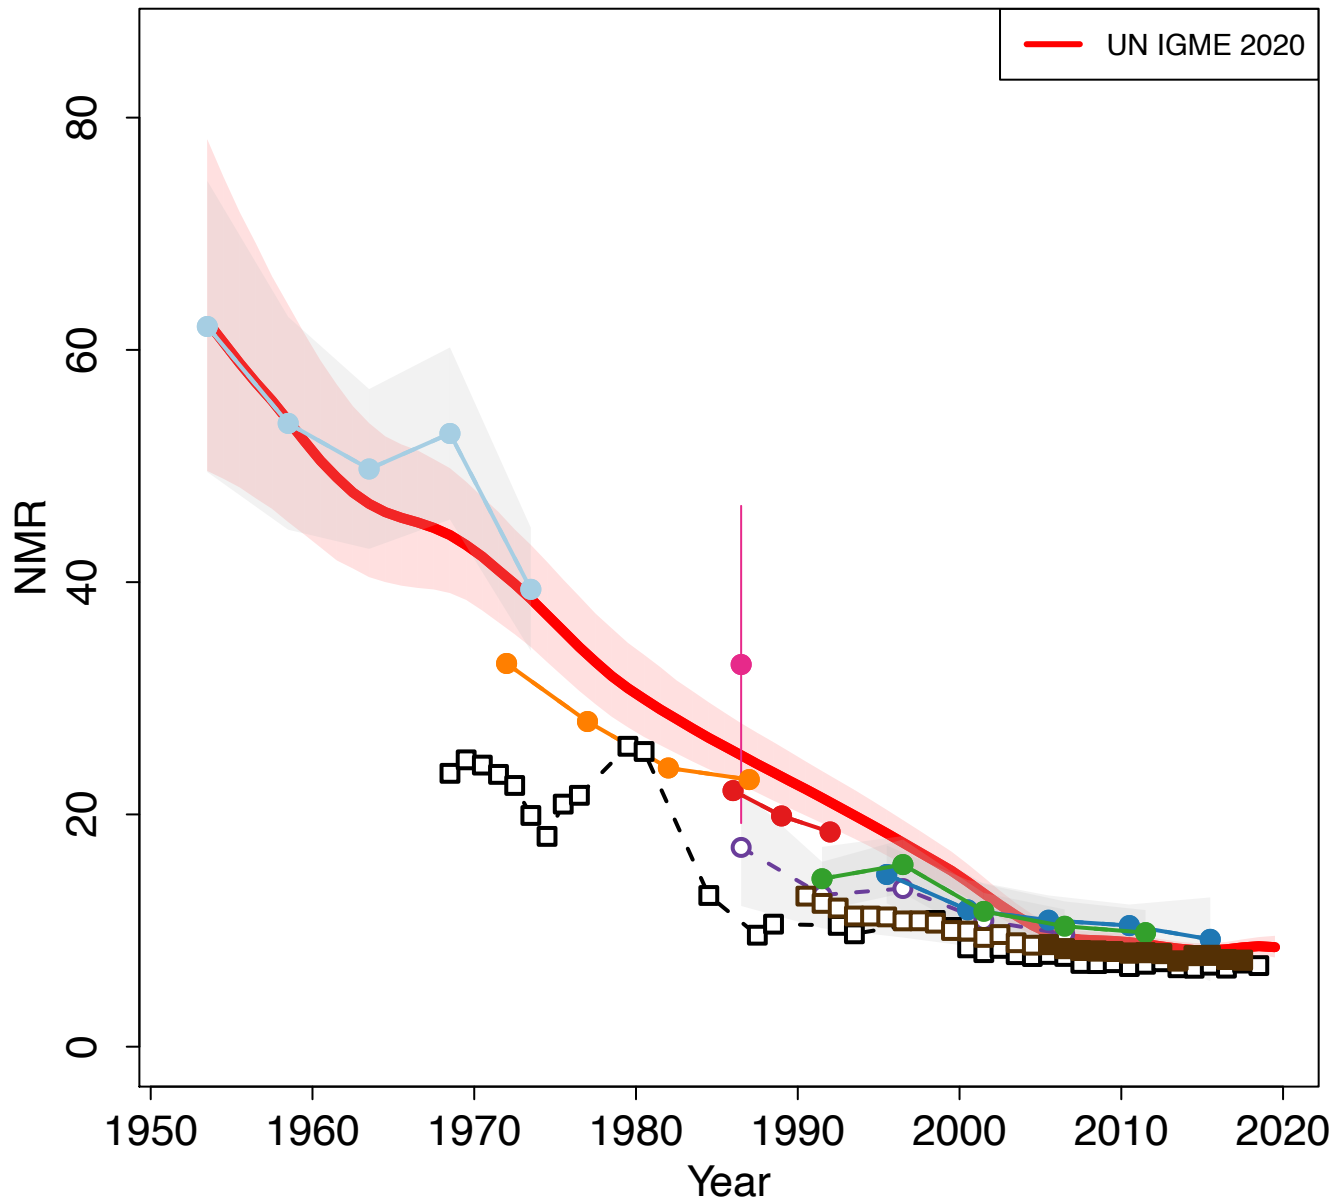

# Zoomed in

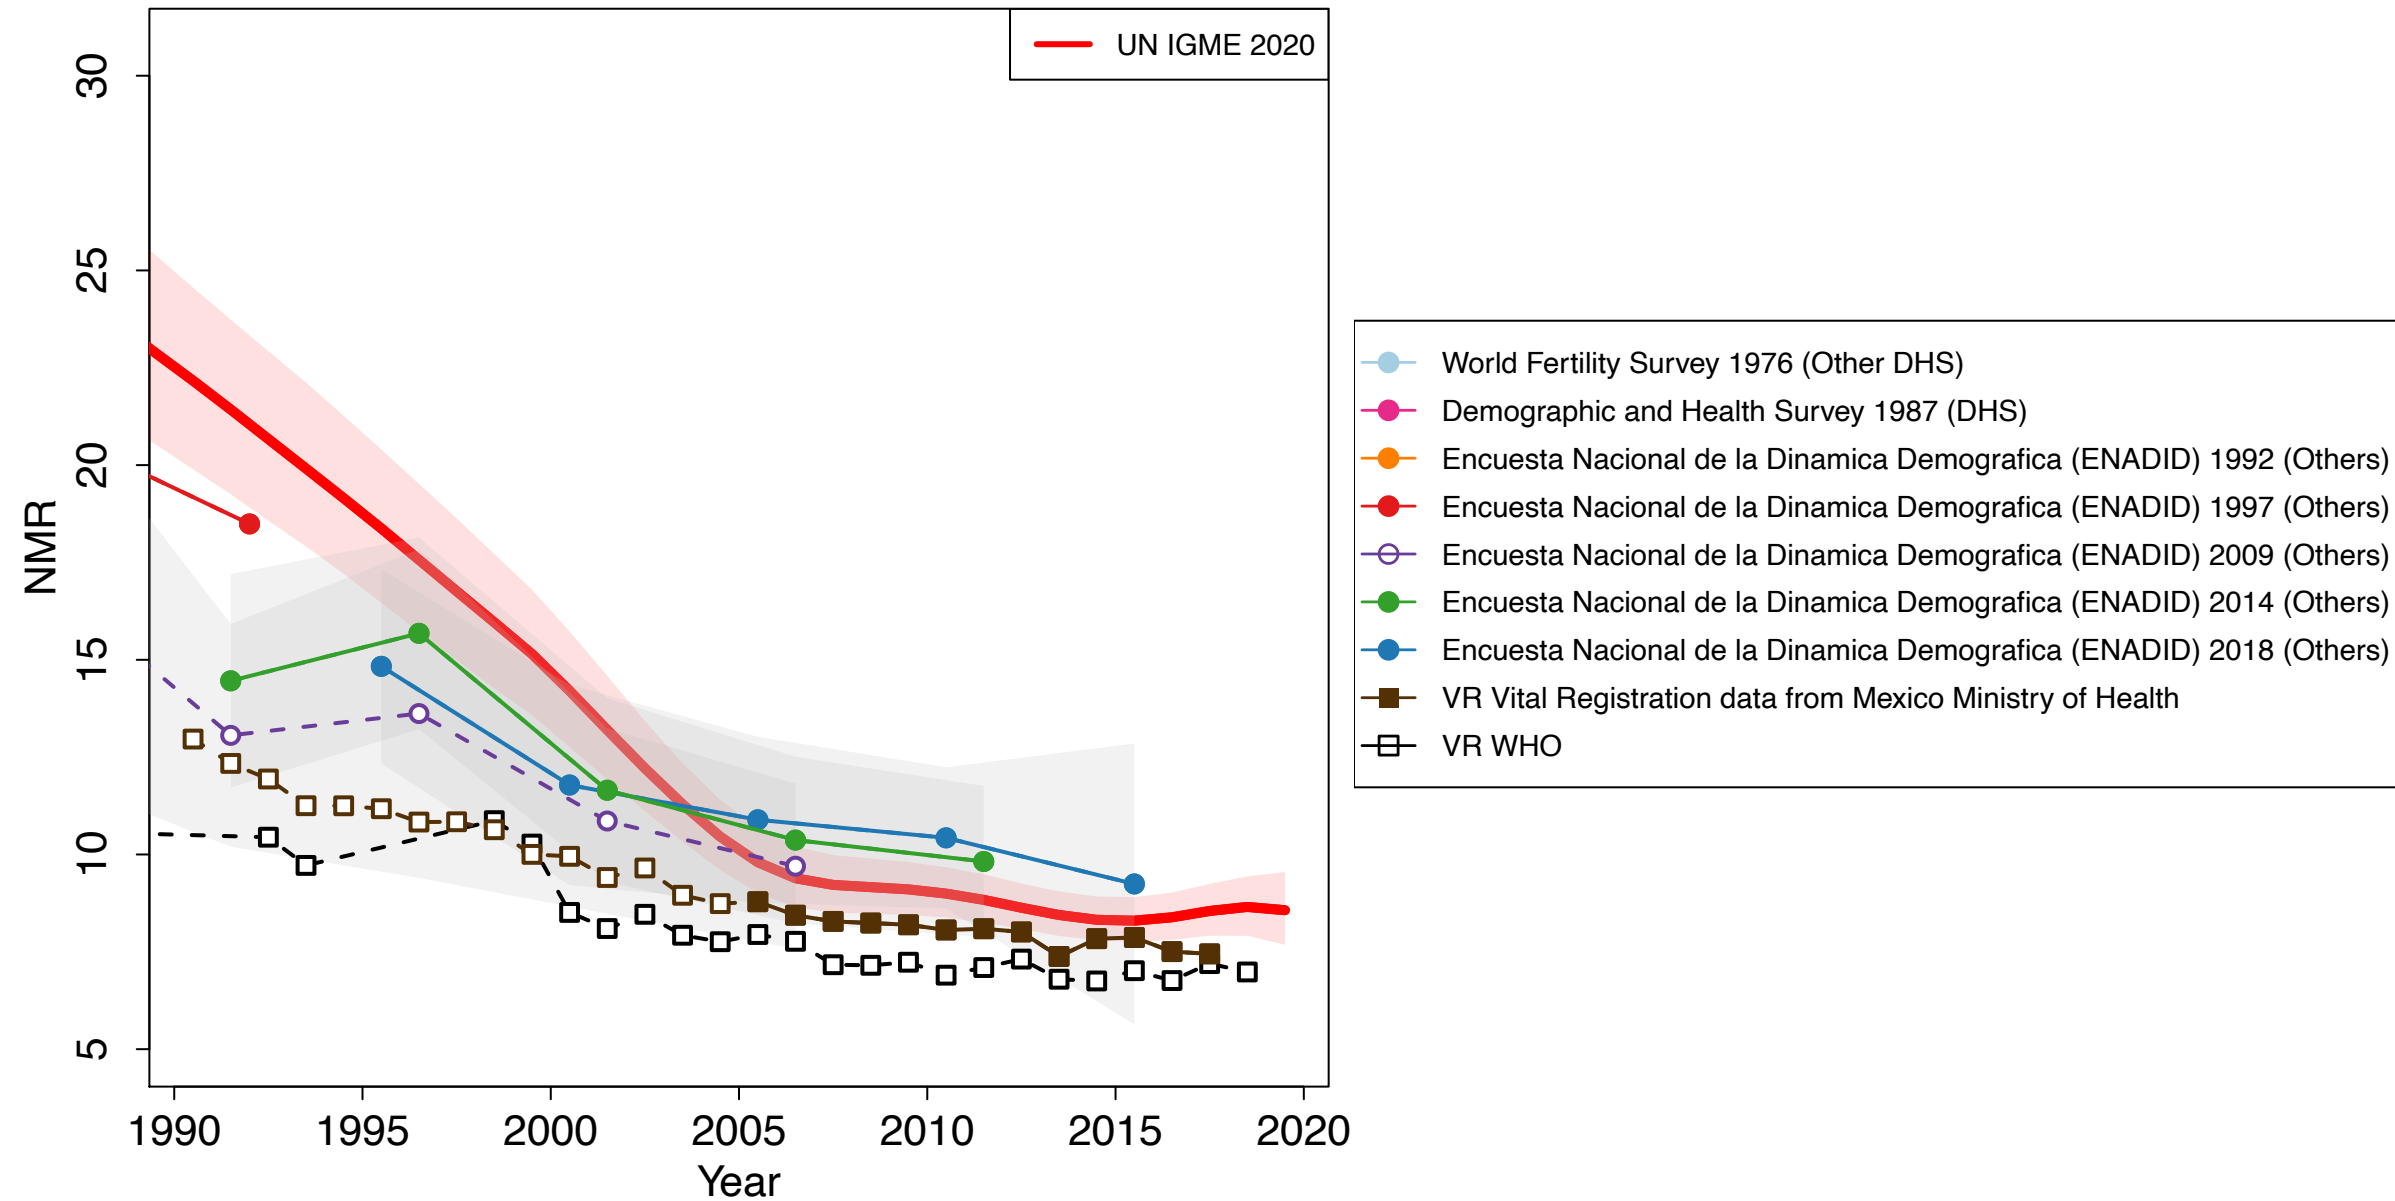

# Republic of Moldova

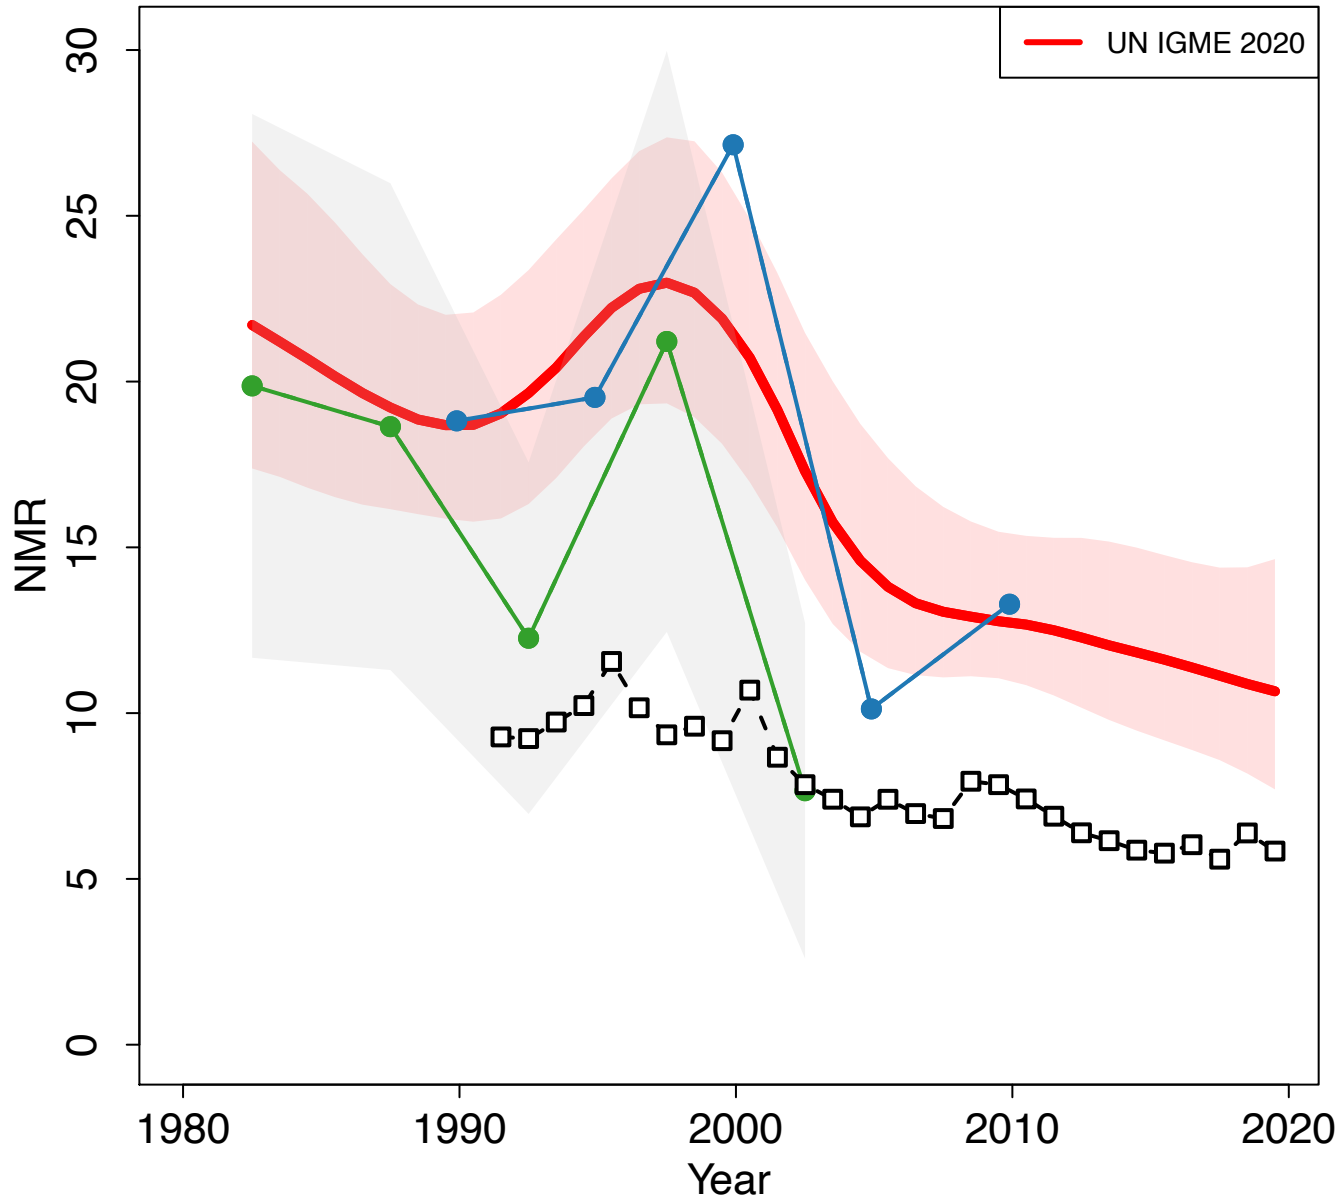

# Zoomed in

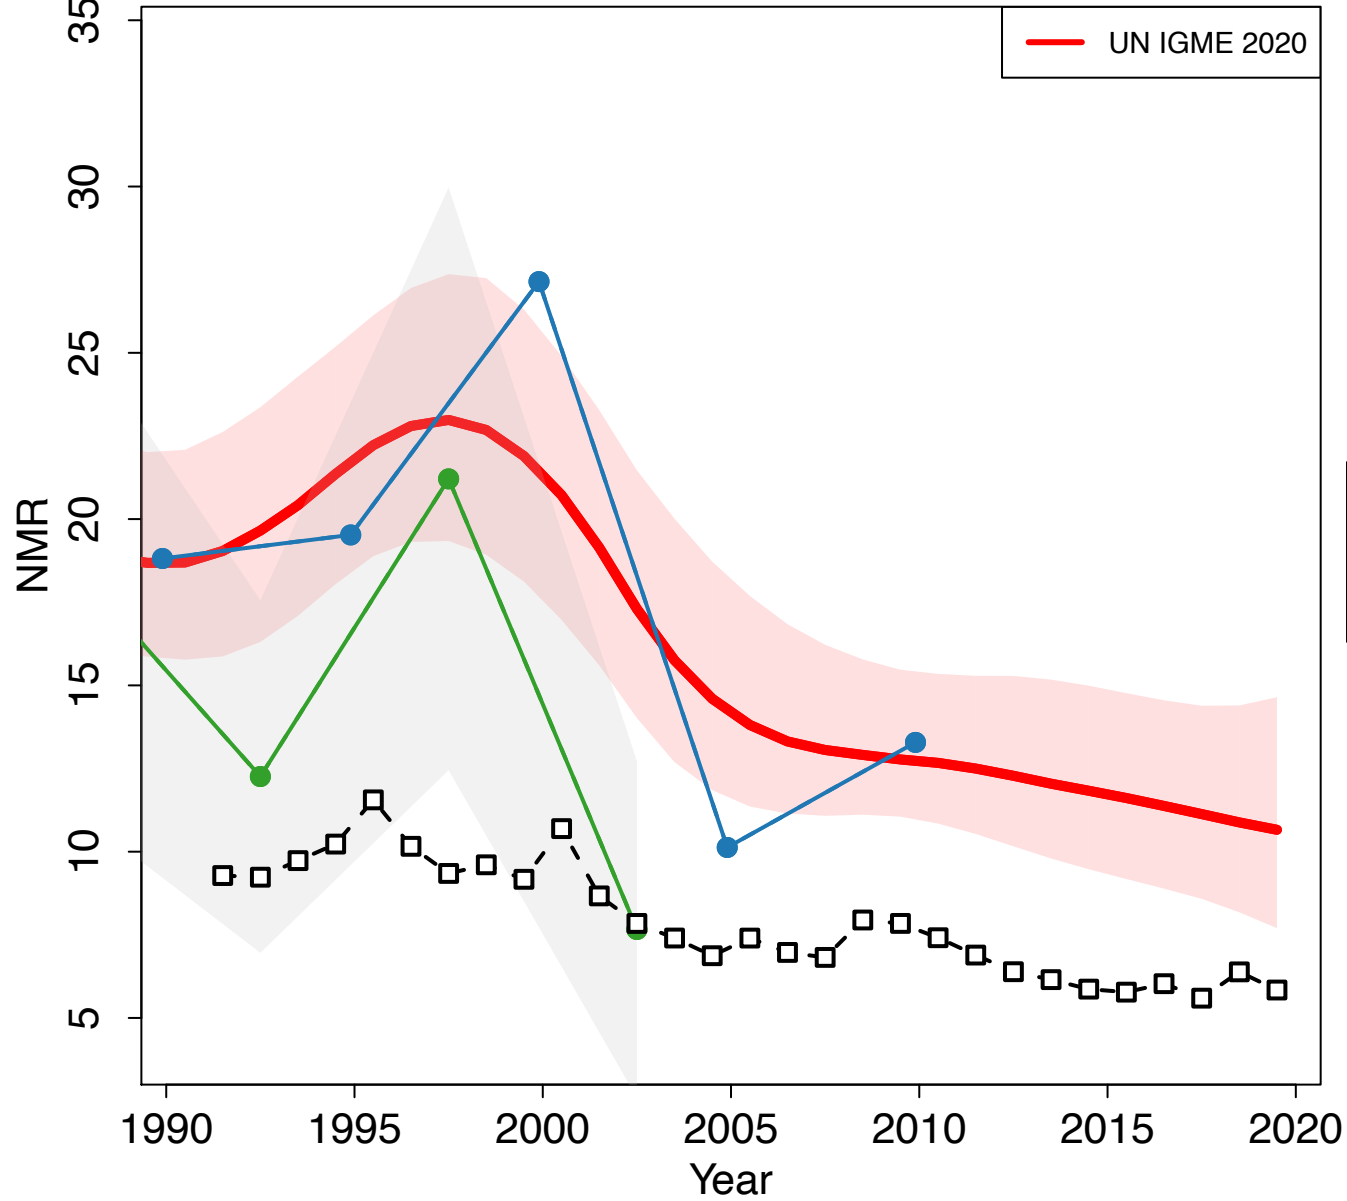

# Monaco

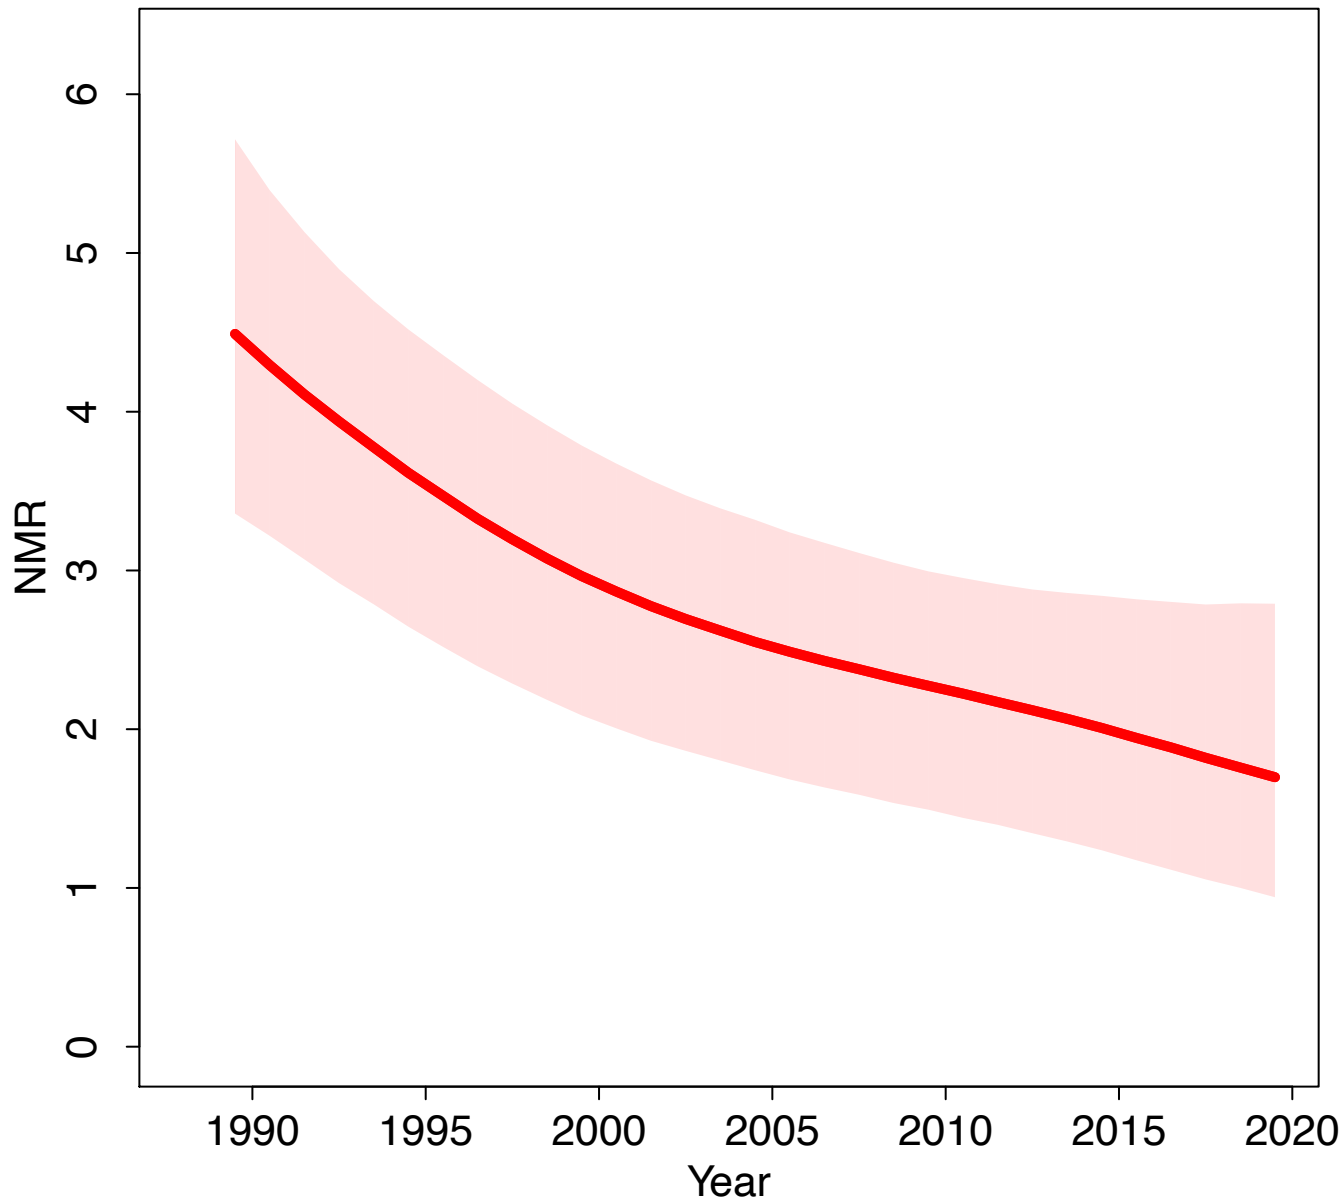

# Zoomed in

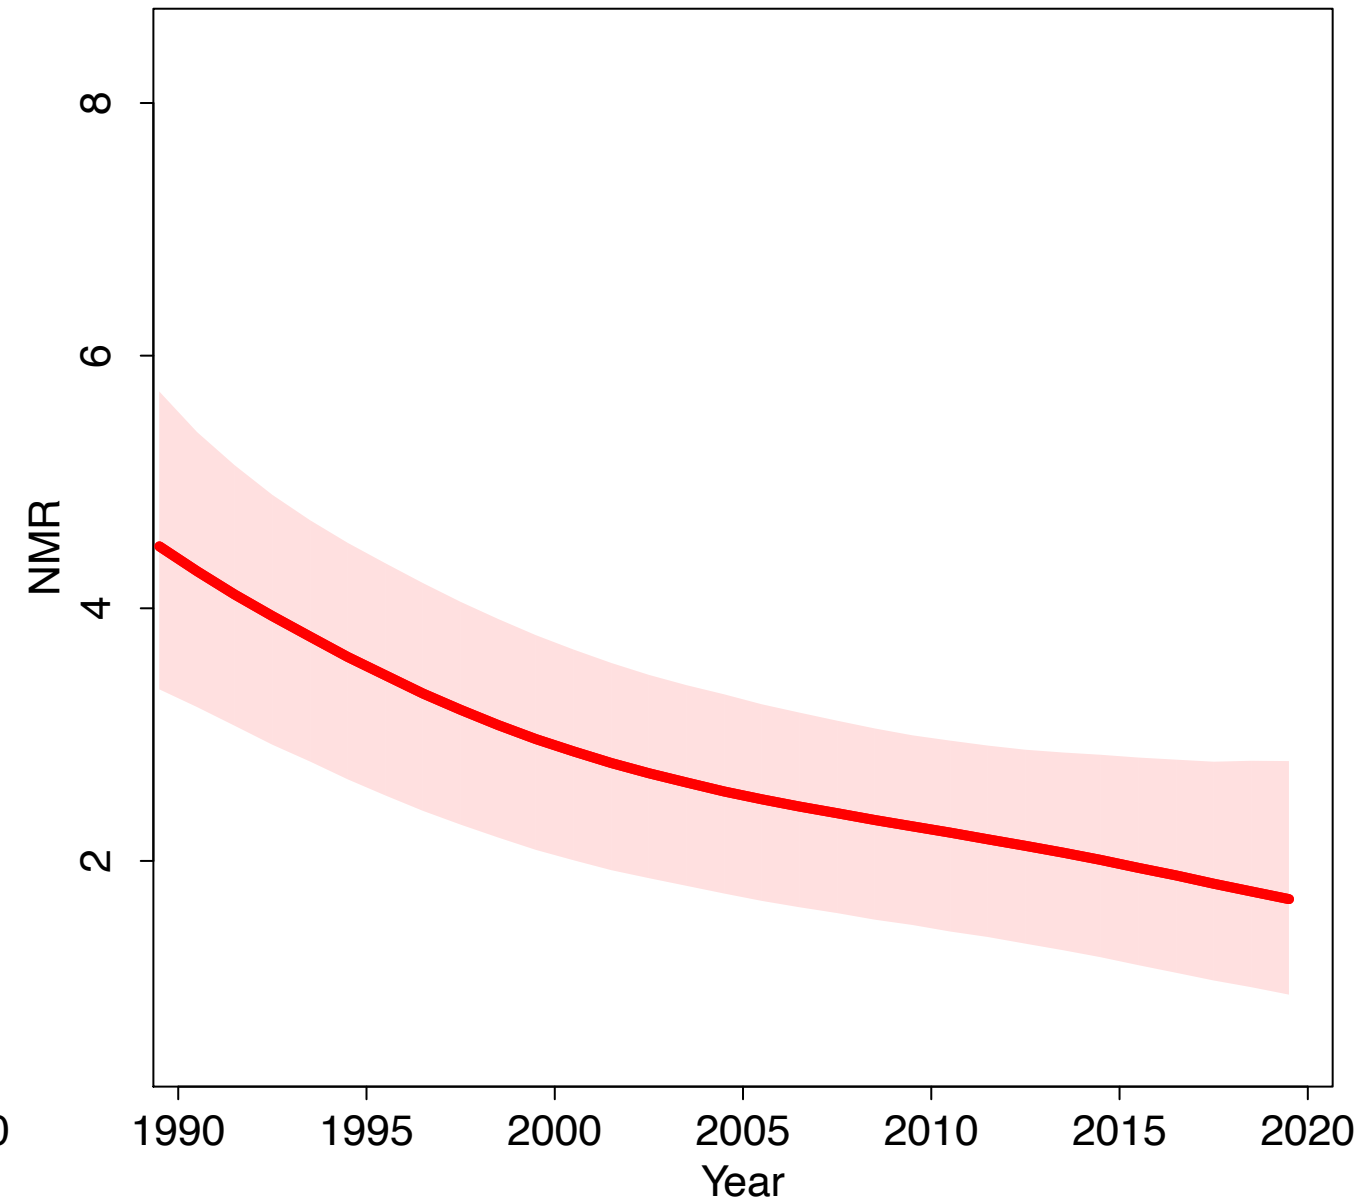



# Mongolia

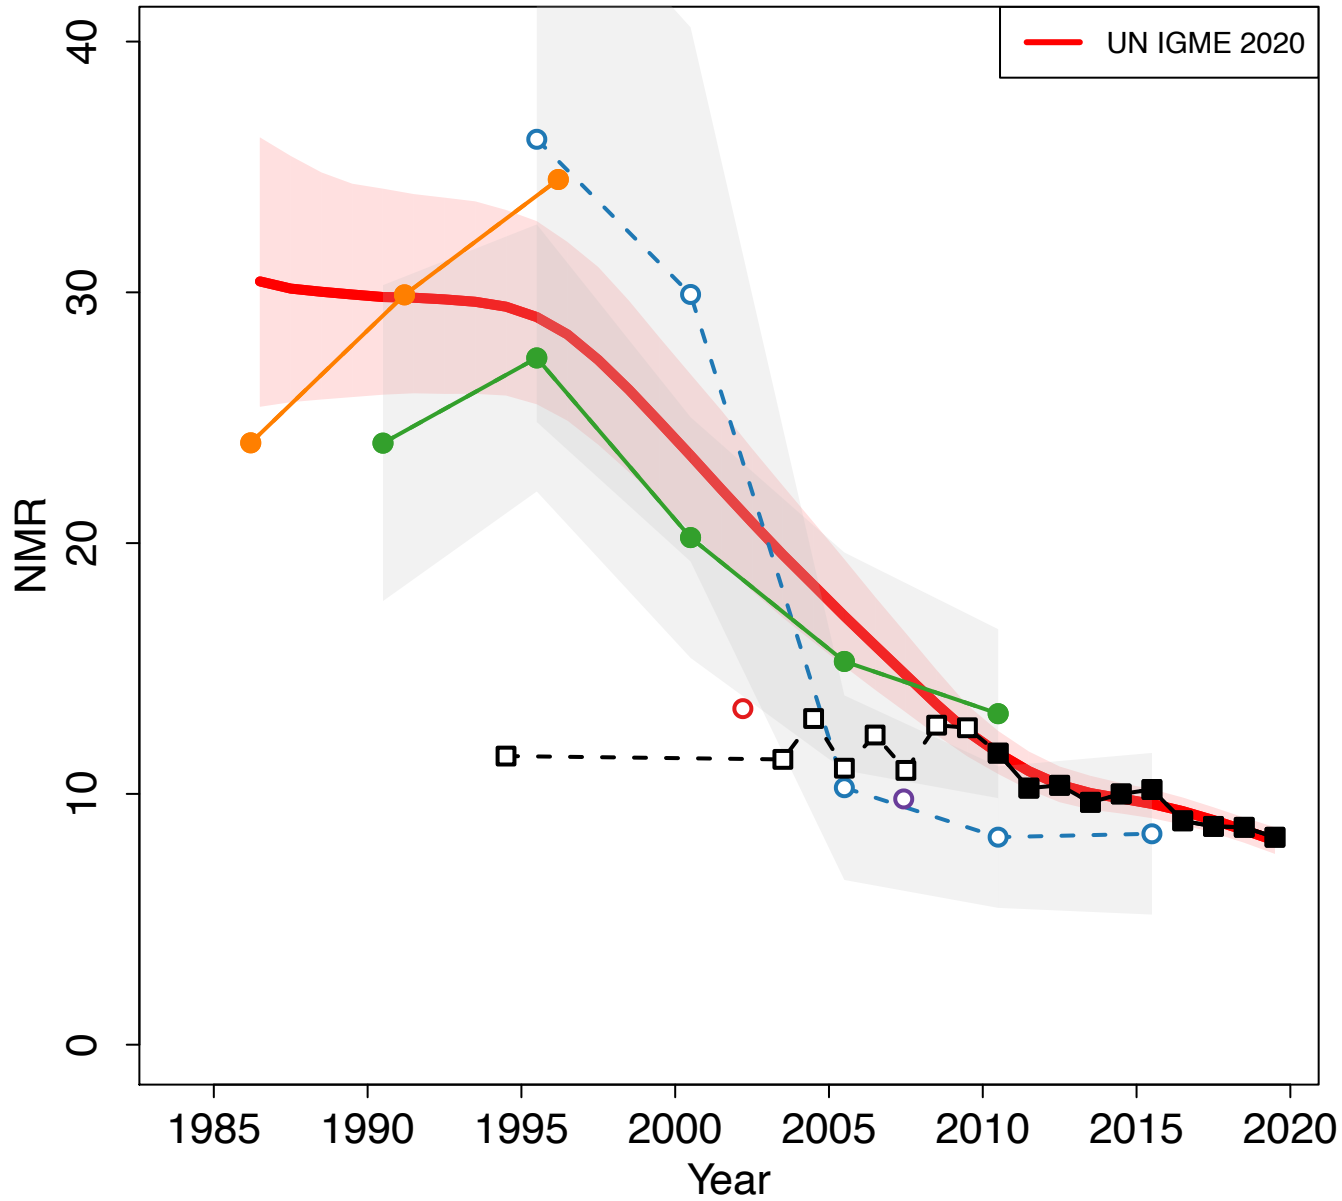

# Zoomed in

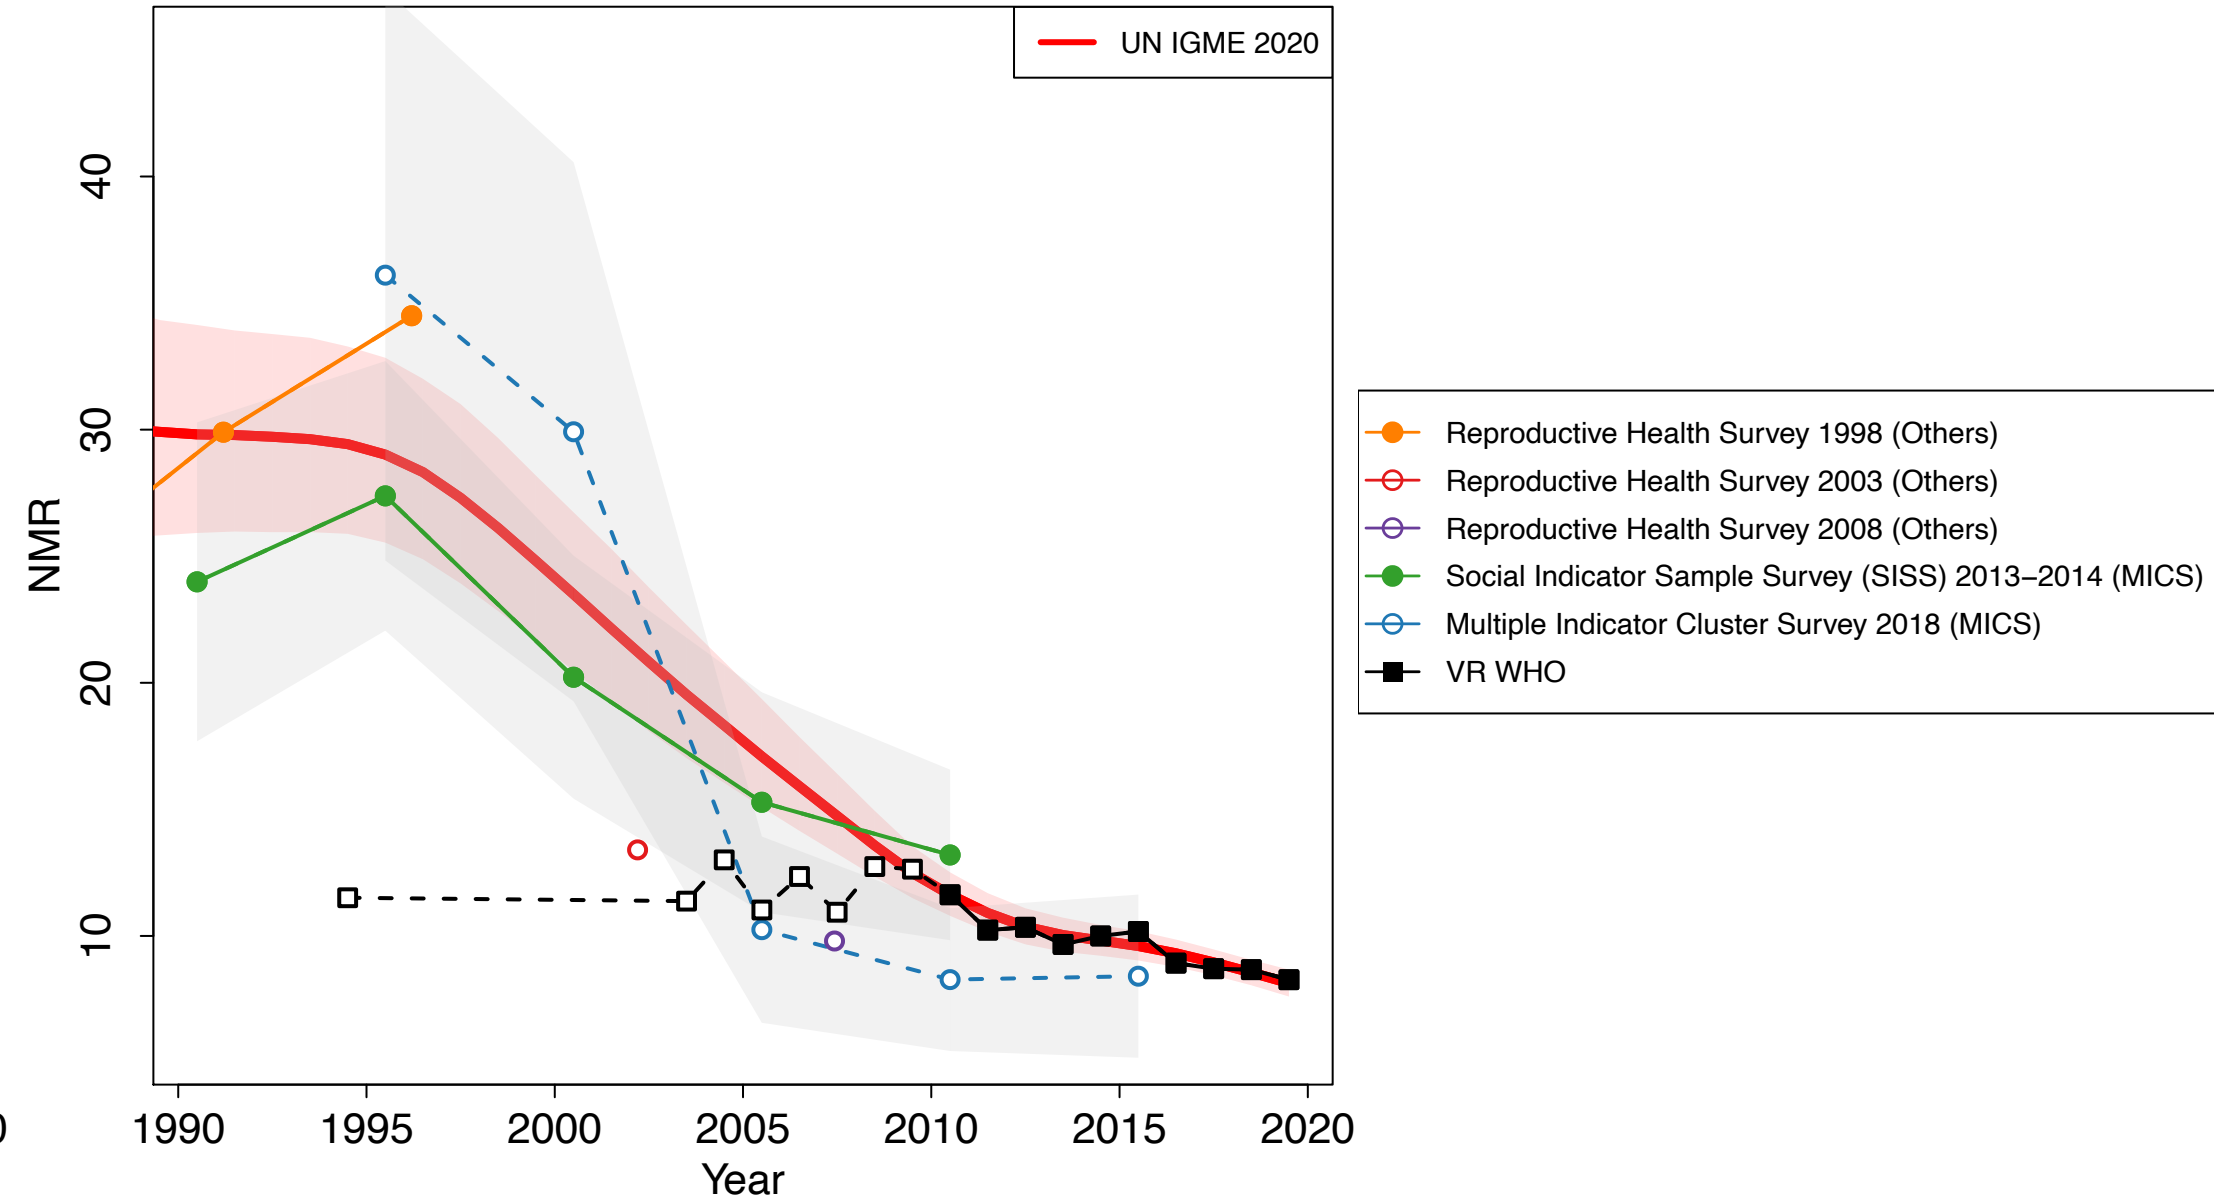

# Montenegro

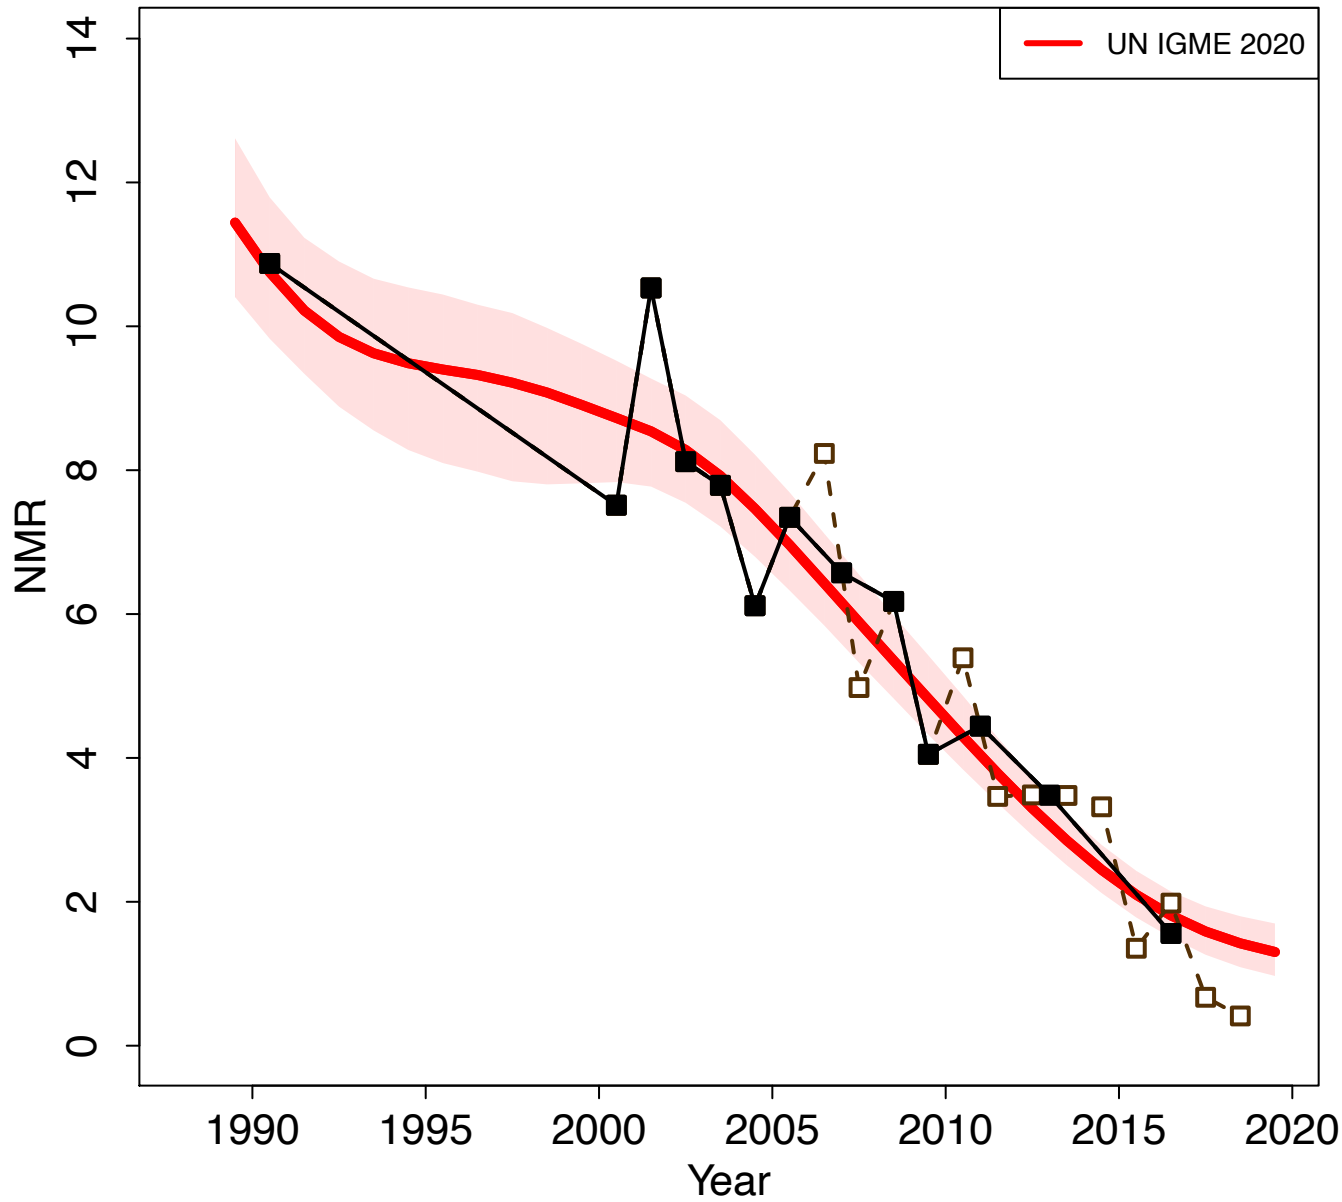

# Zoomed in

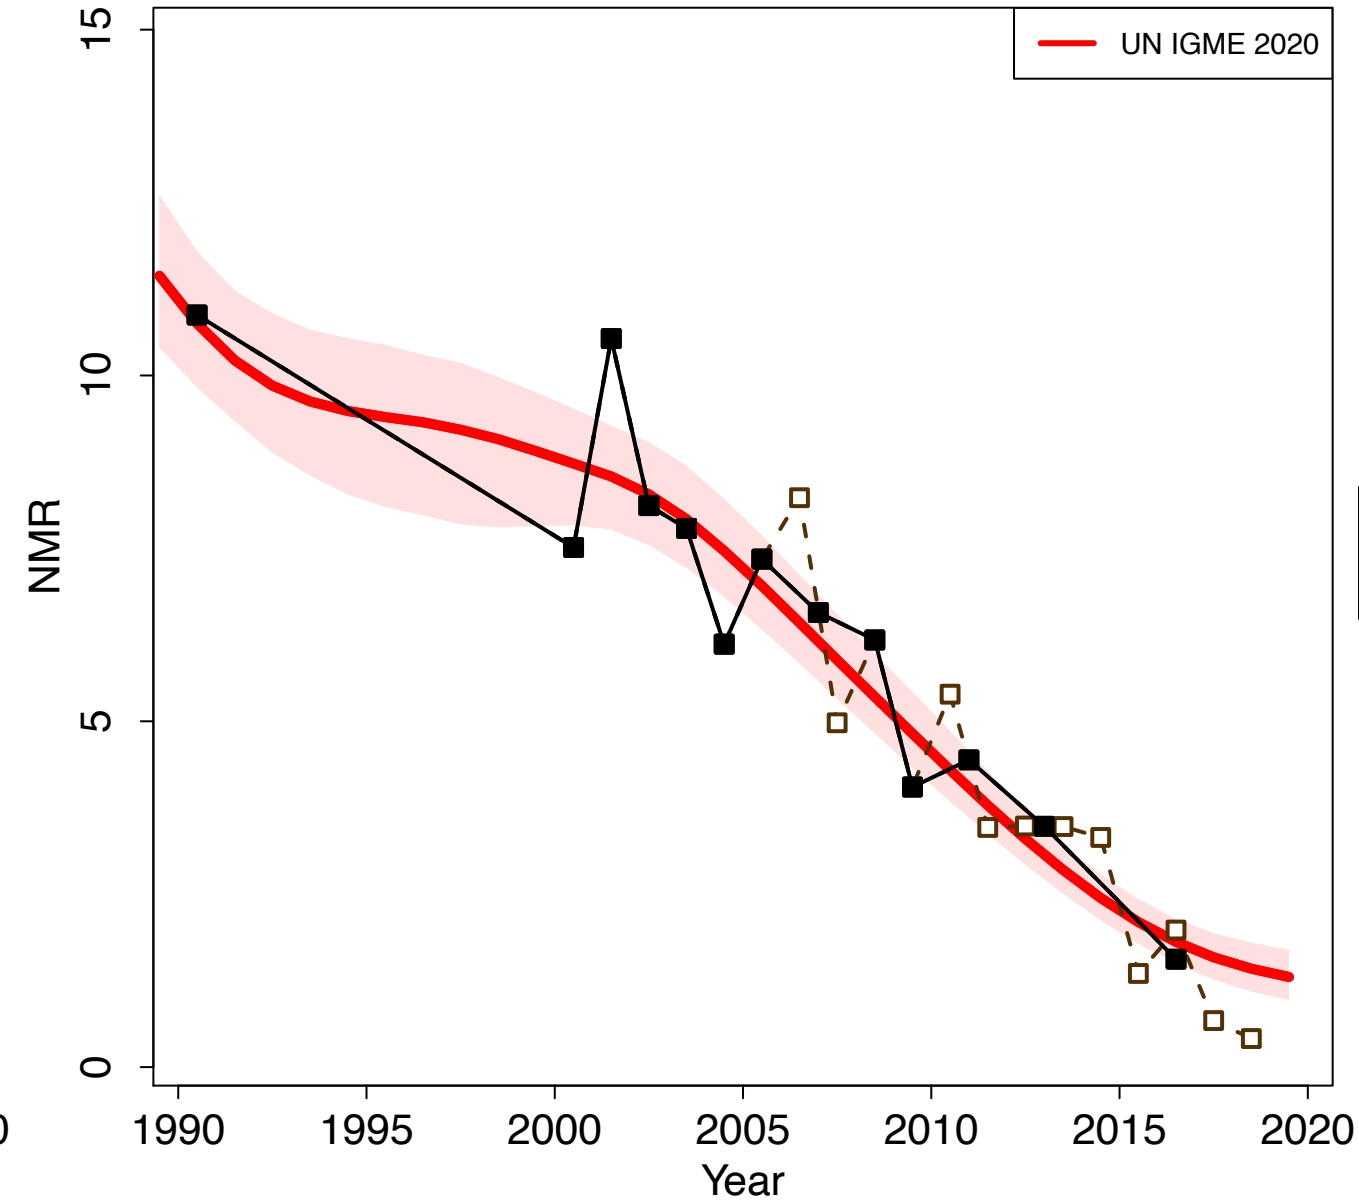

# Morocco

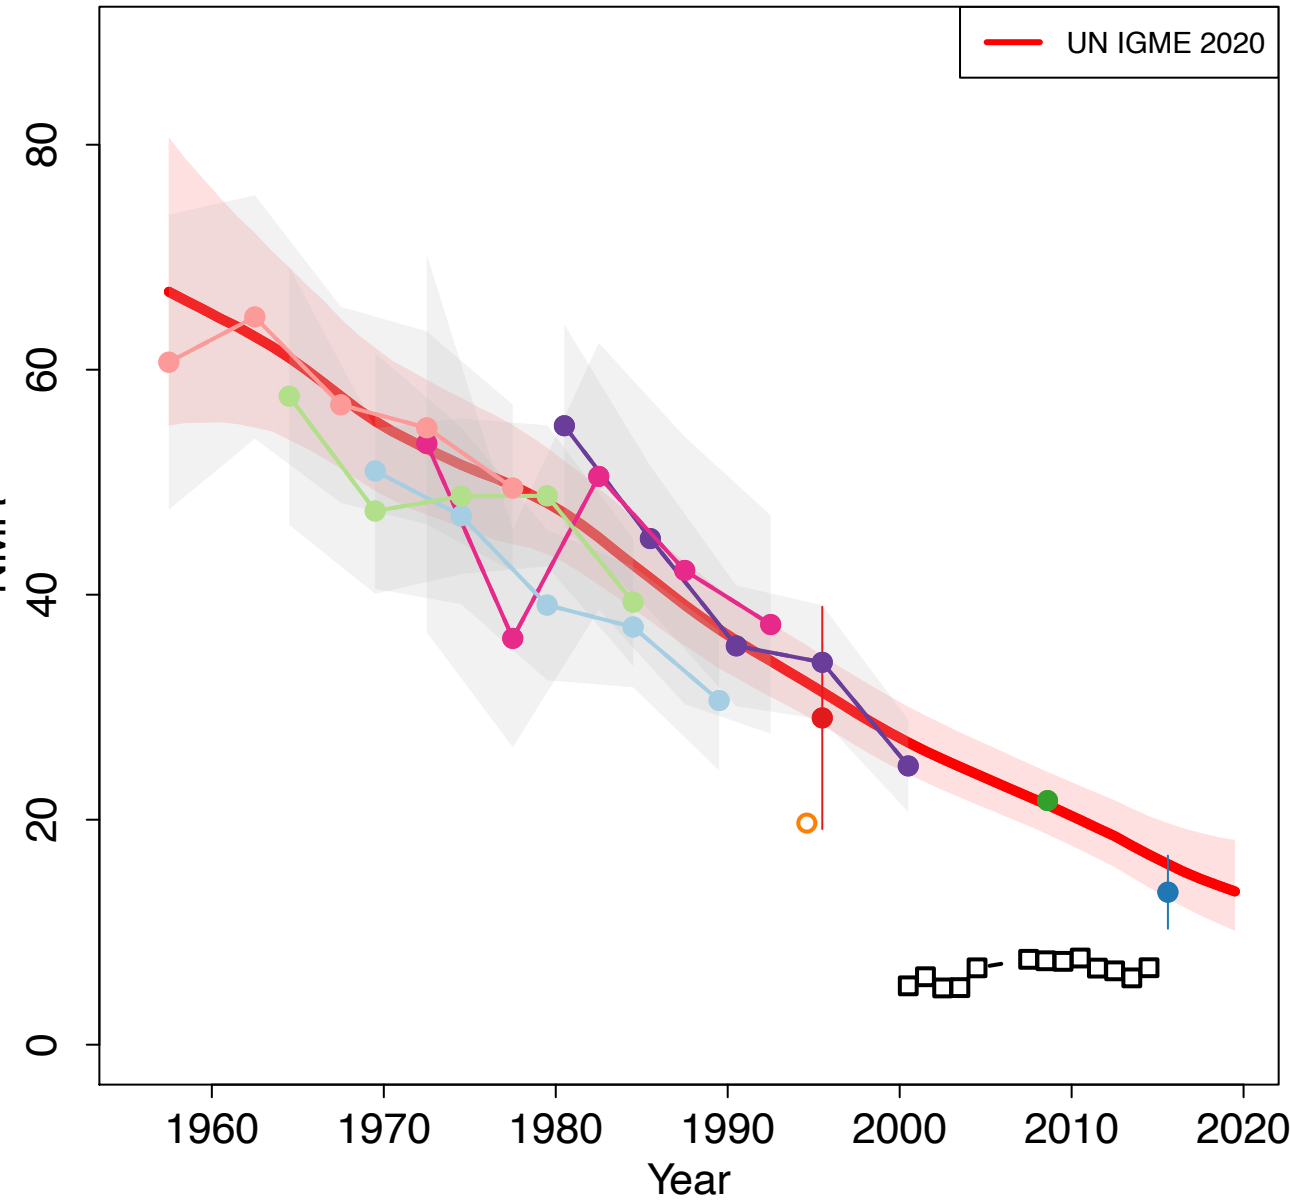

# Zoomed in

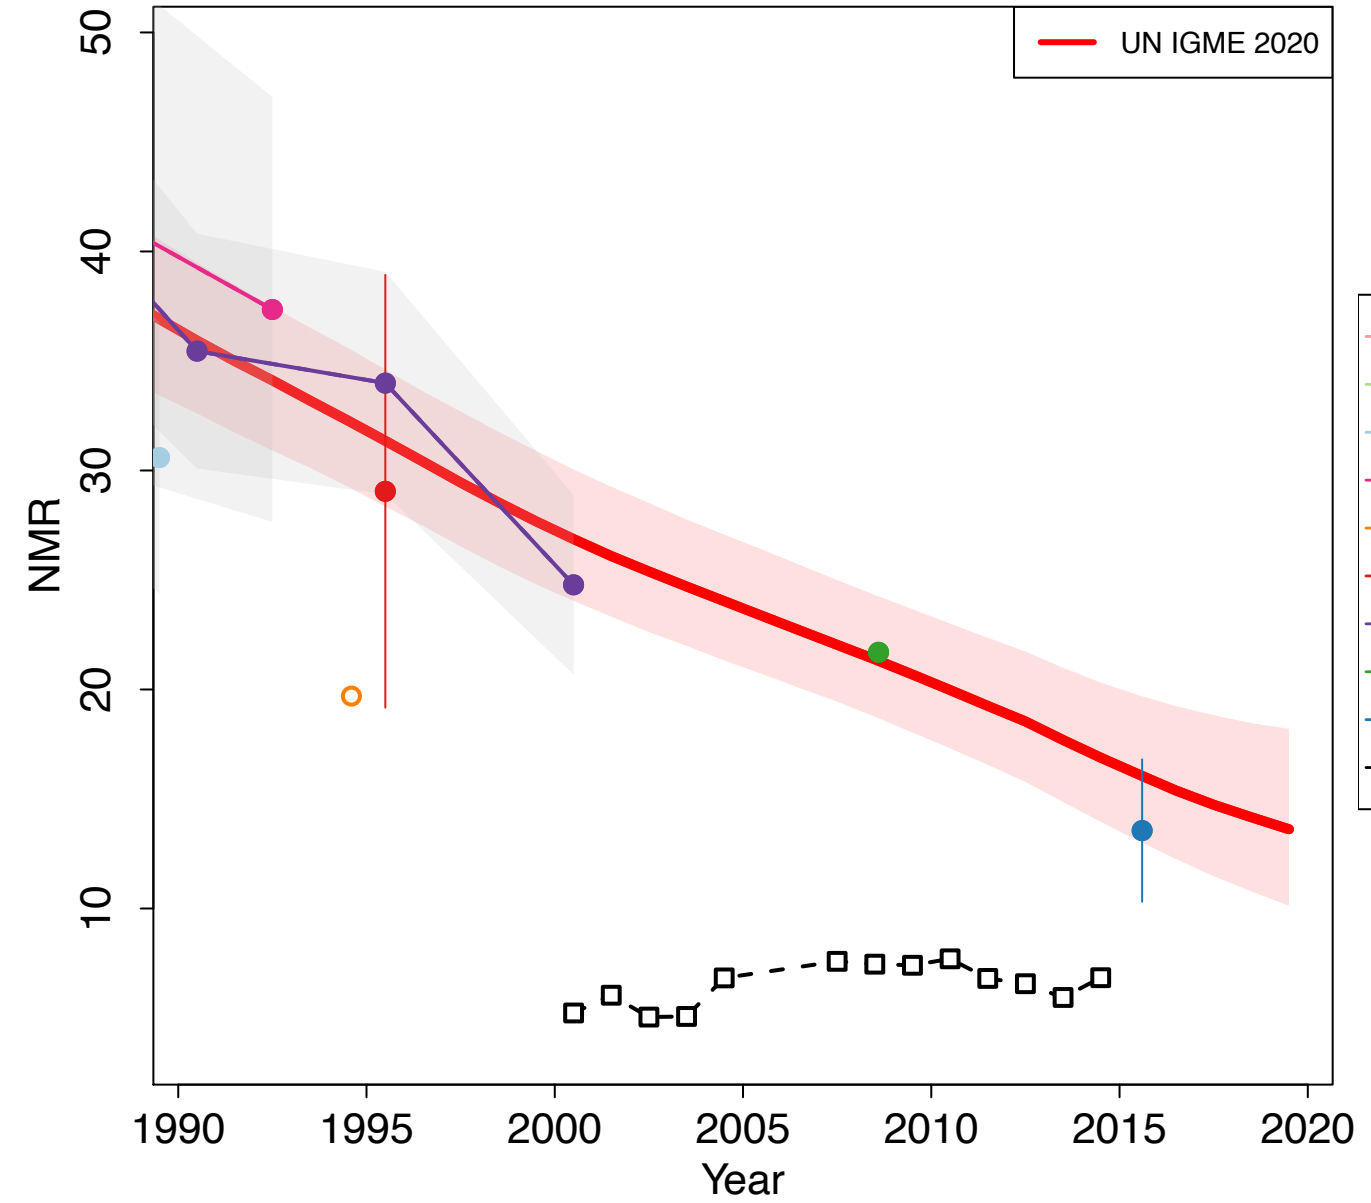

- World Fertility Survey 1980 (Other DHS)
- Demographic and Health Survey 1987 (DHS)
- Demographic and Health Survey 1992 (DHS)
- Demographic and Health Survey 1995 (DHS)
- PAPG ENSME grand-echantillon 1996 1996 (Others)
- PAPCHILD Maternal and Child Health Survey 1997 (Others)
- Demographic and Health Survey 2003-2004 (DHS)
- National Survey on Population and Family Health 2011 (Others)
- National Survey on Population and Family Health 2018 (Others)
- VR WHO

# Mozambique

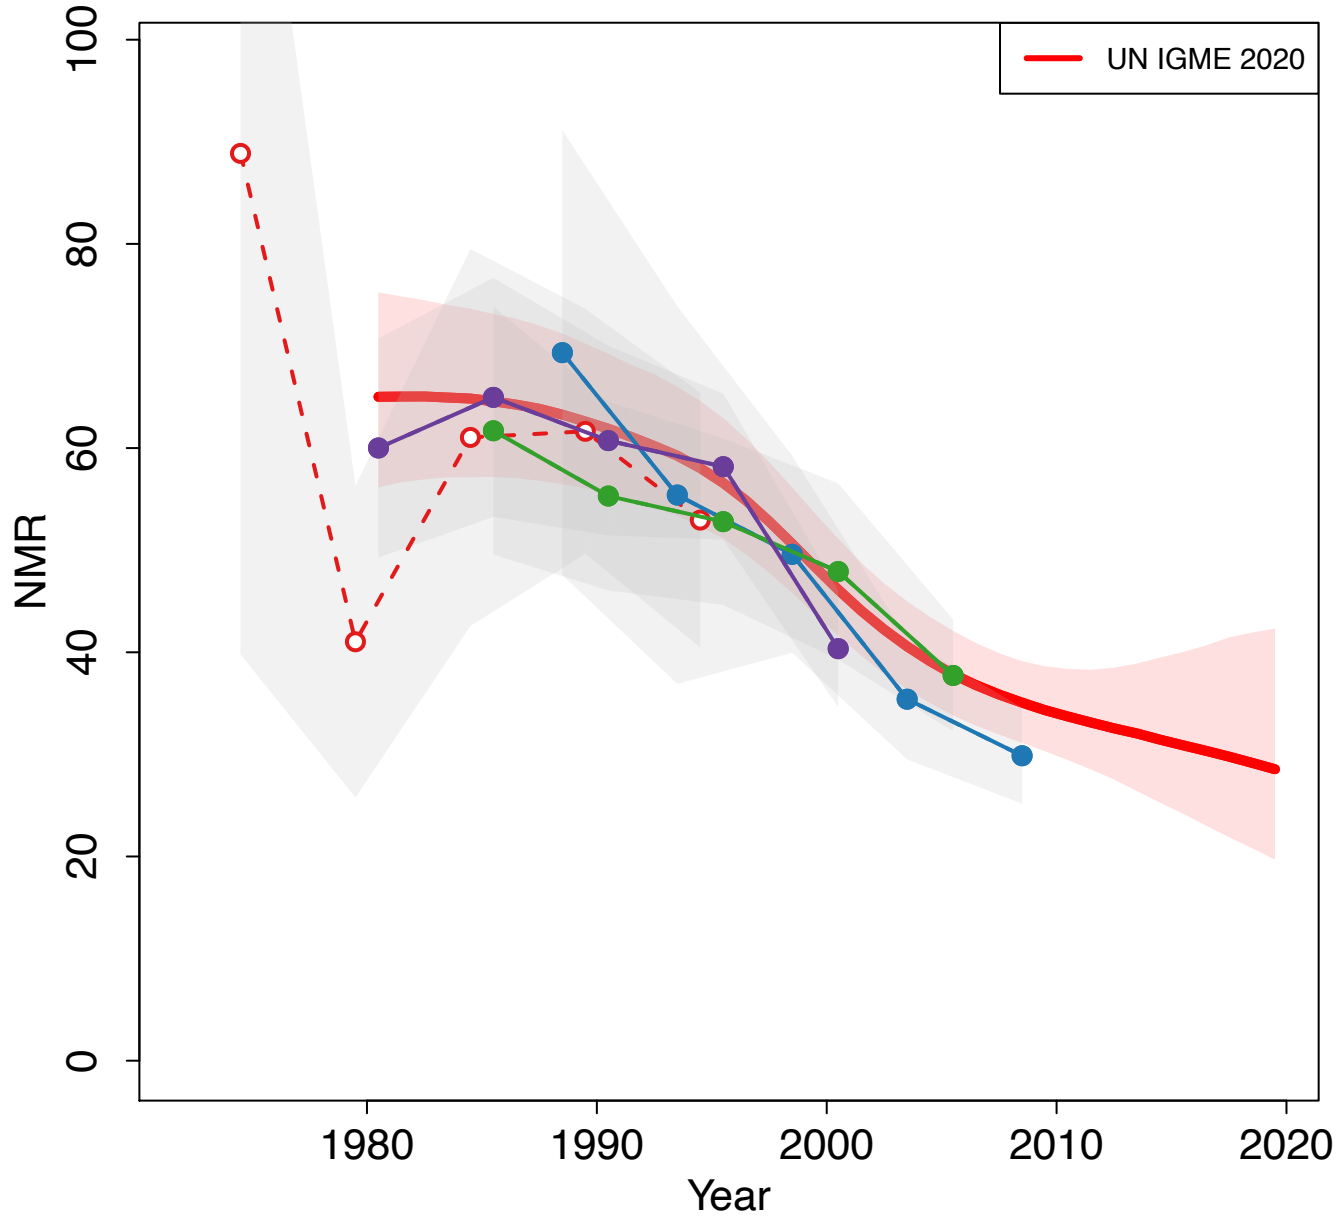

# Zoomed in

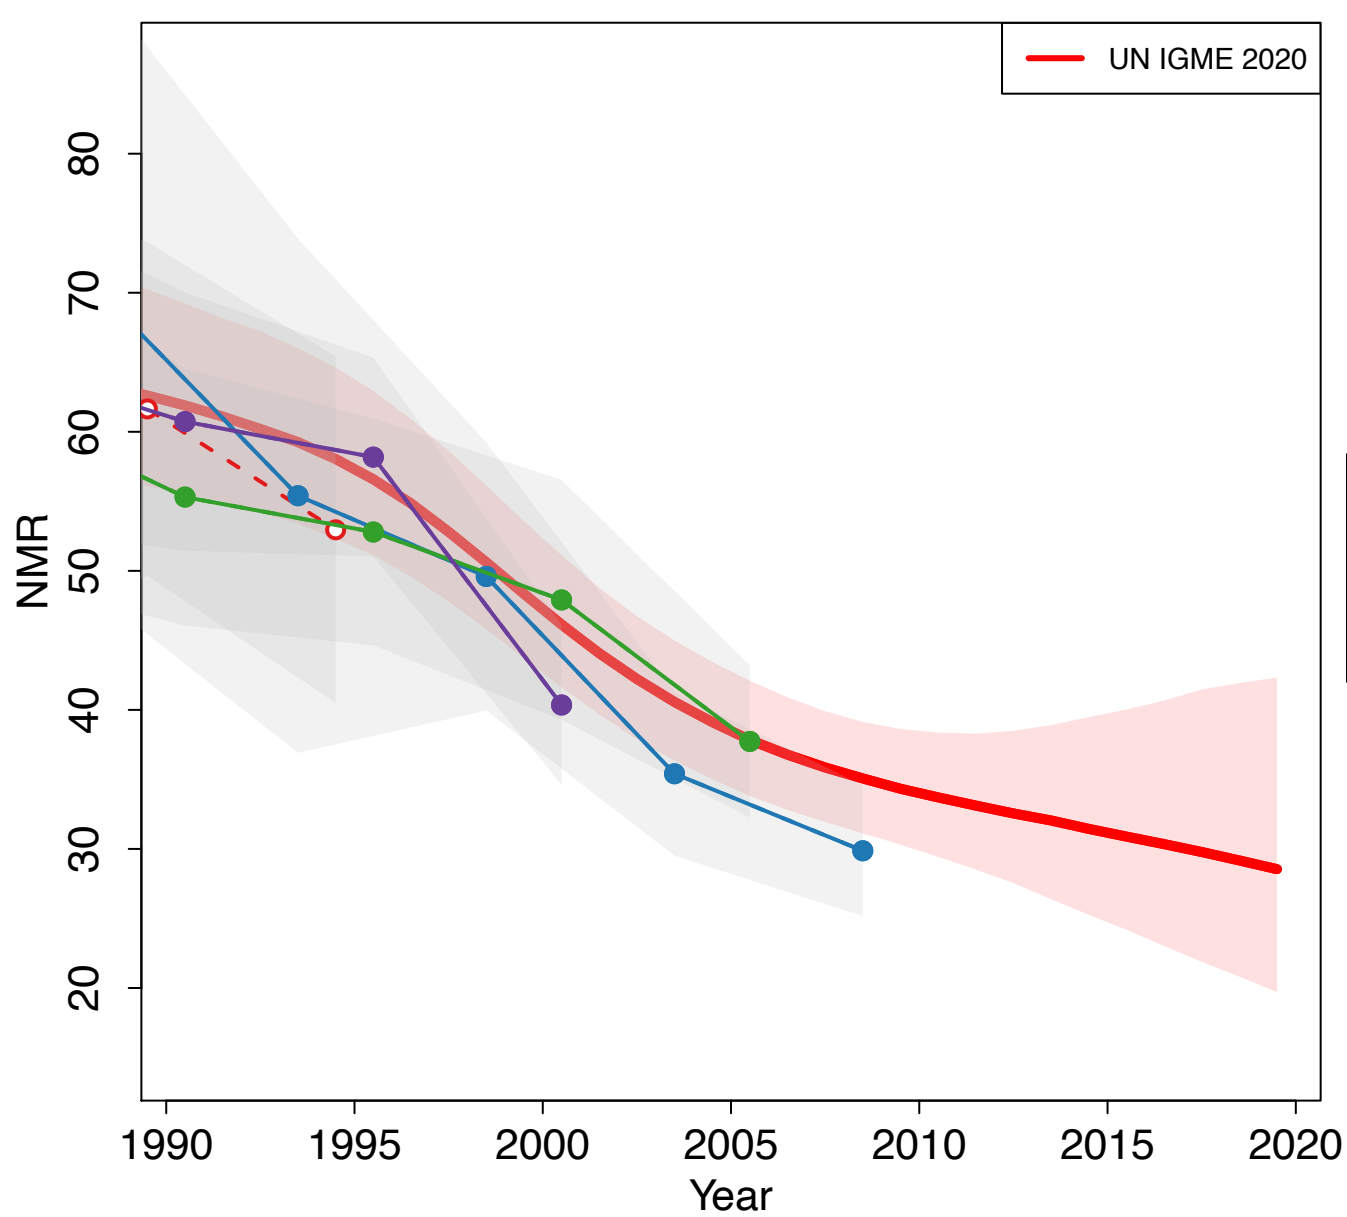

# Myanmar

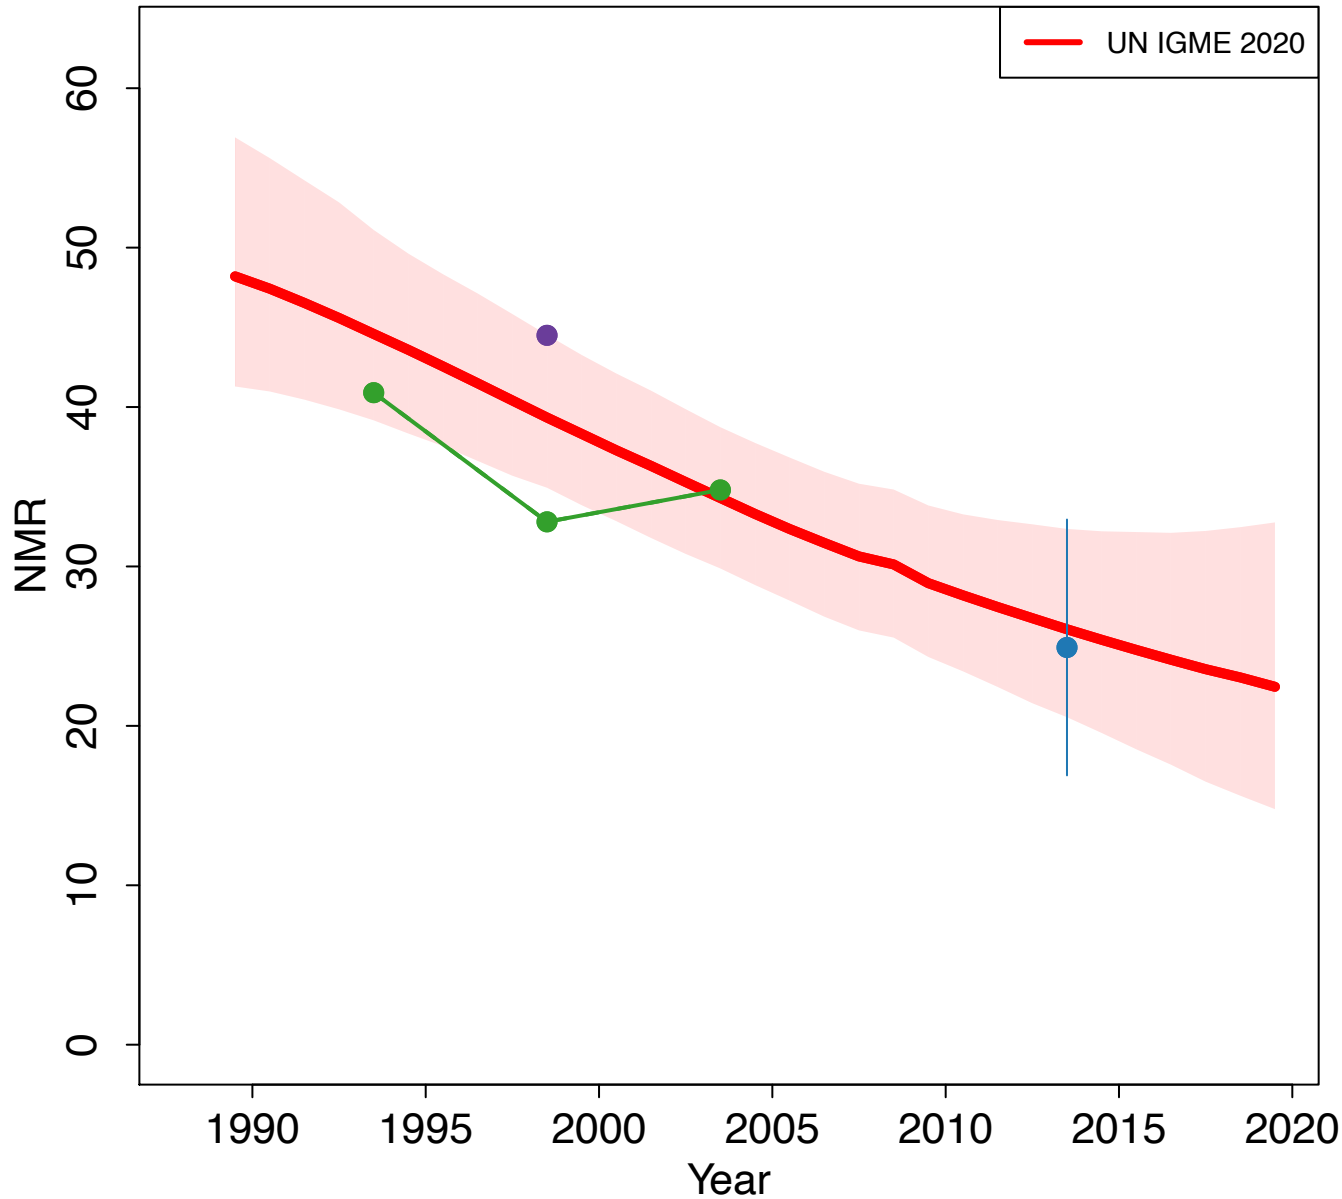

# Zoomed in

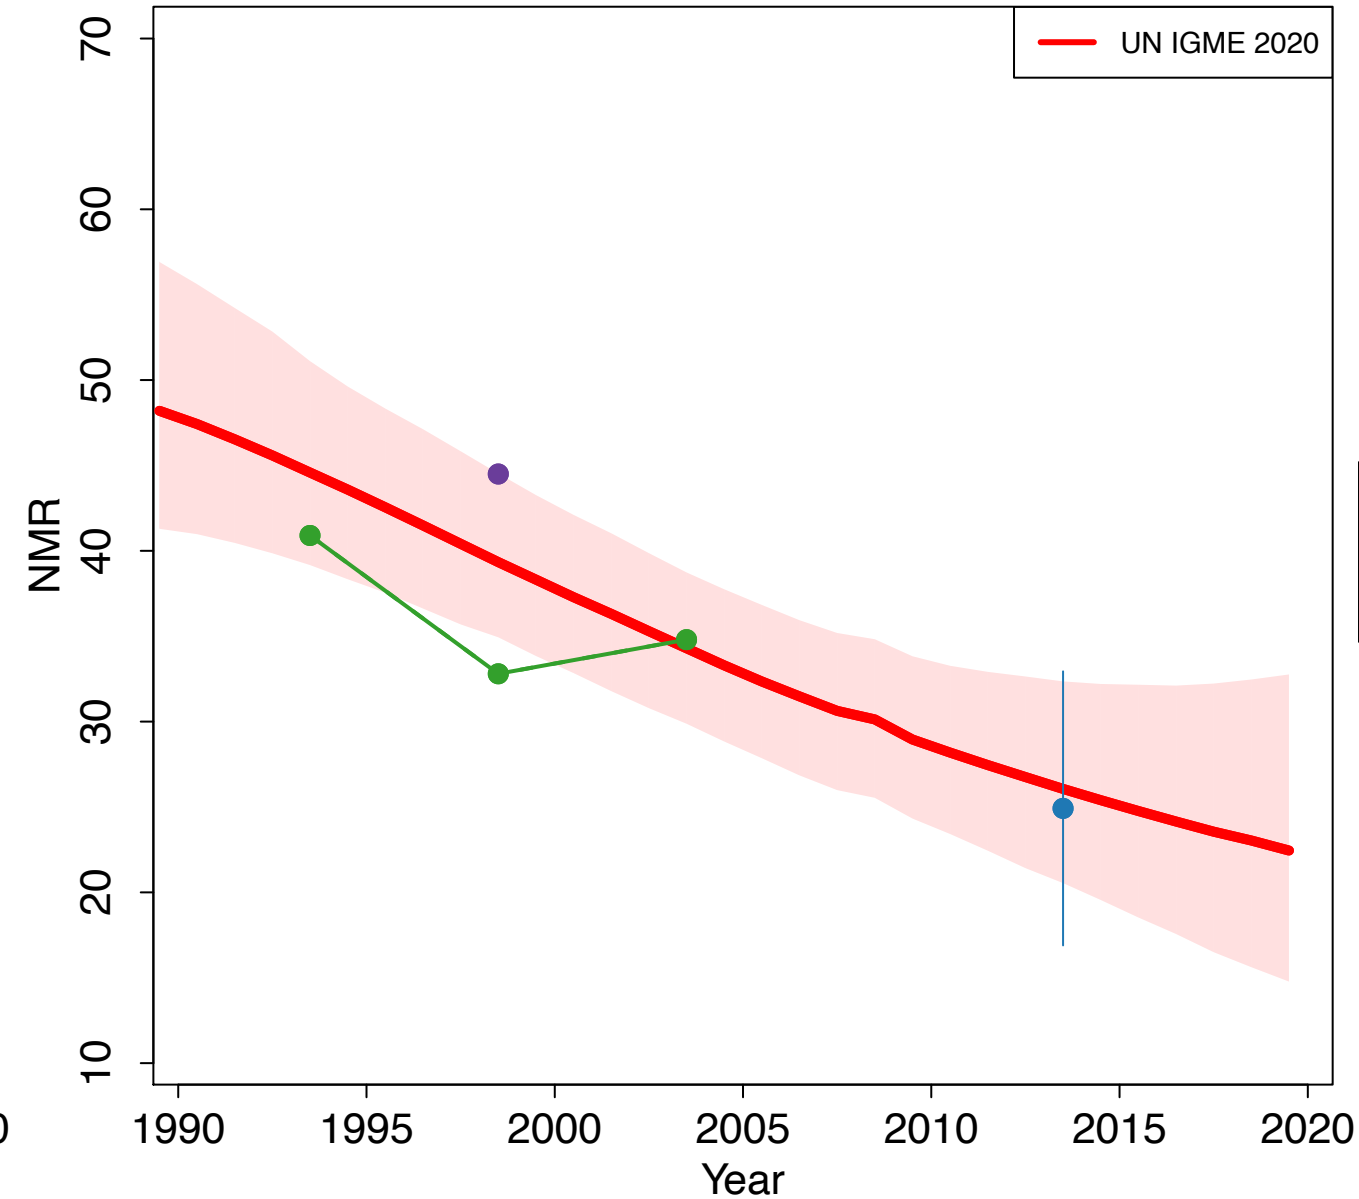

# Namibia

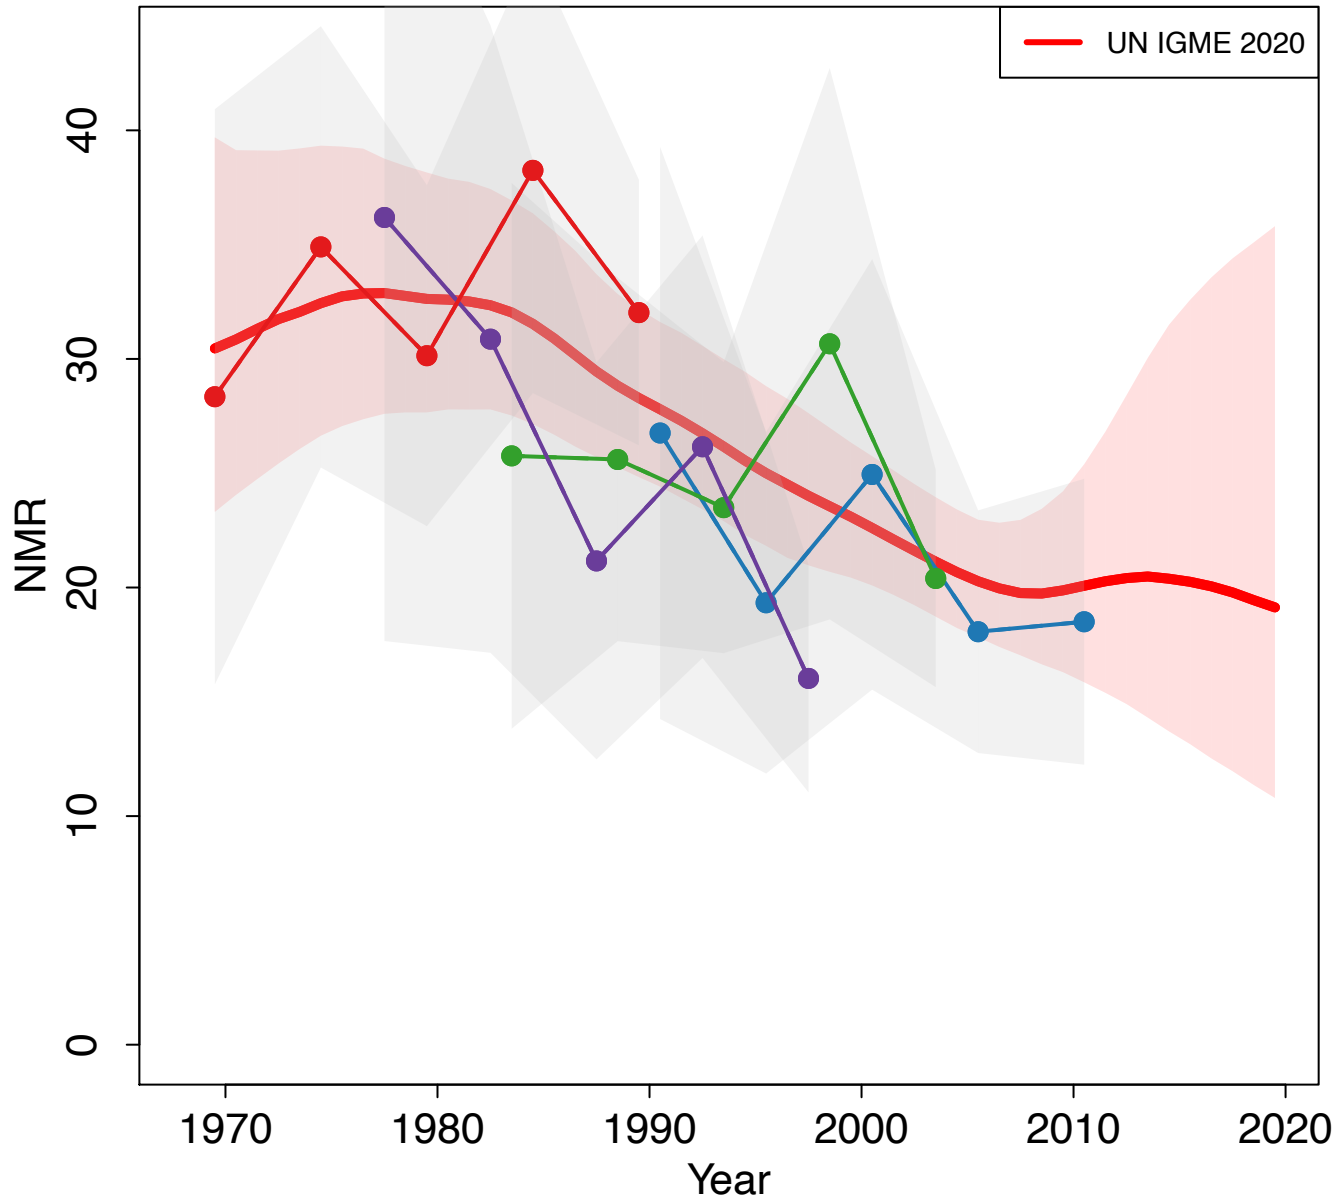

# Zoomed in

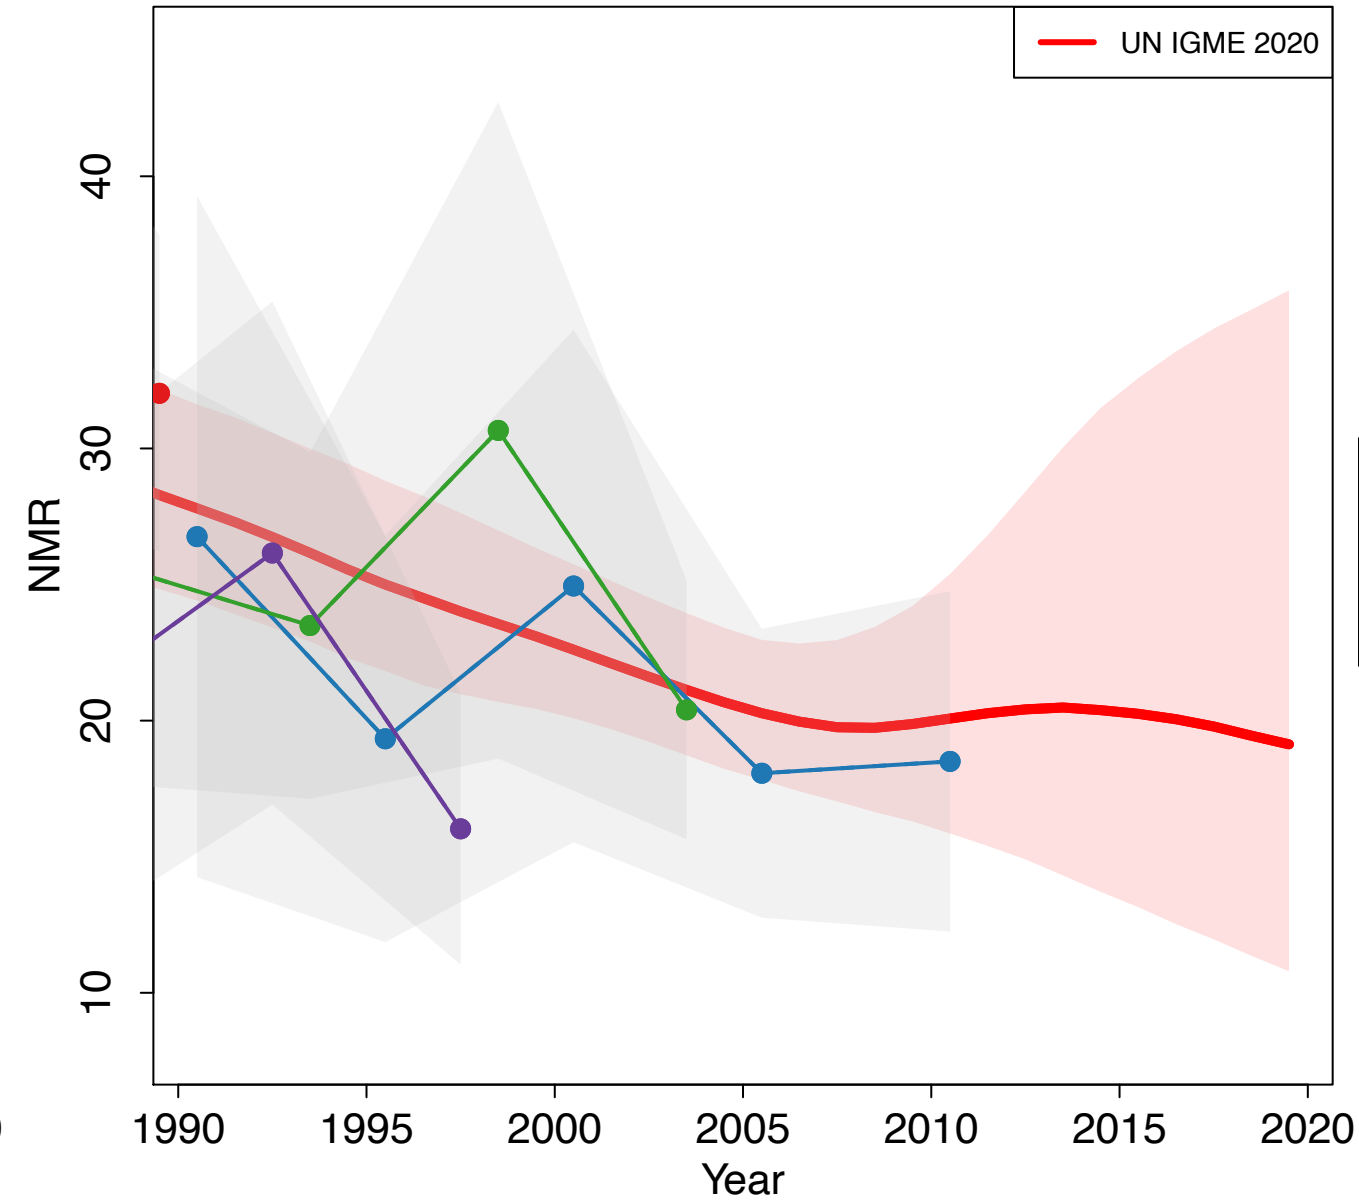

# Nauru

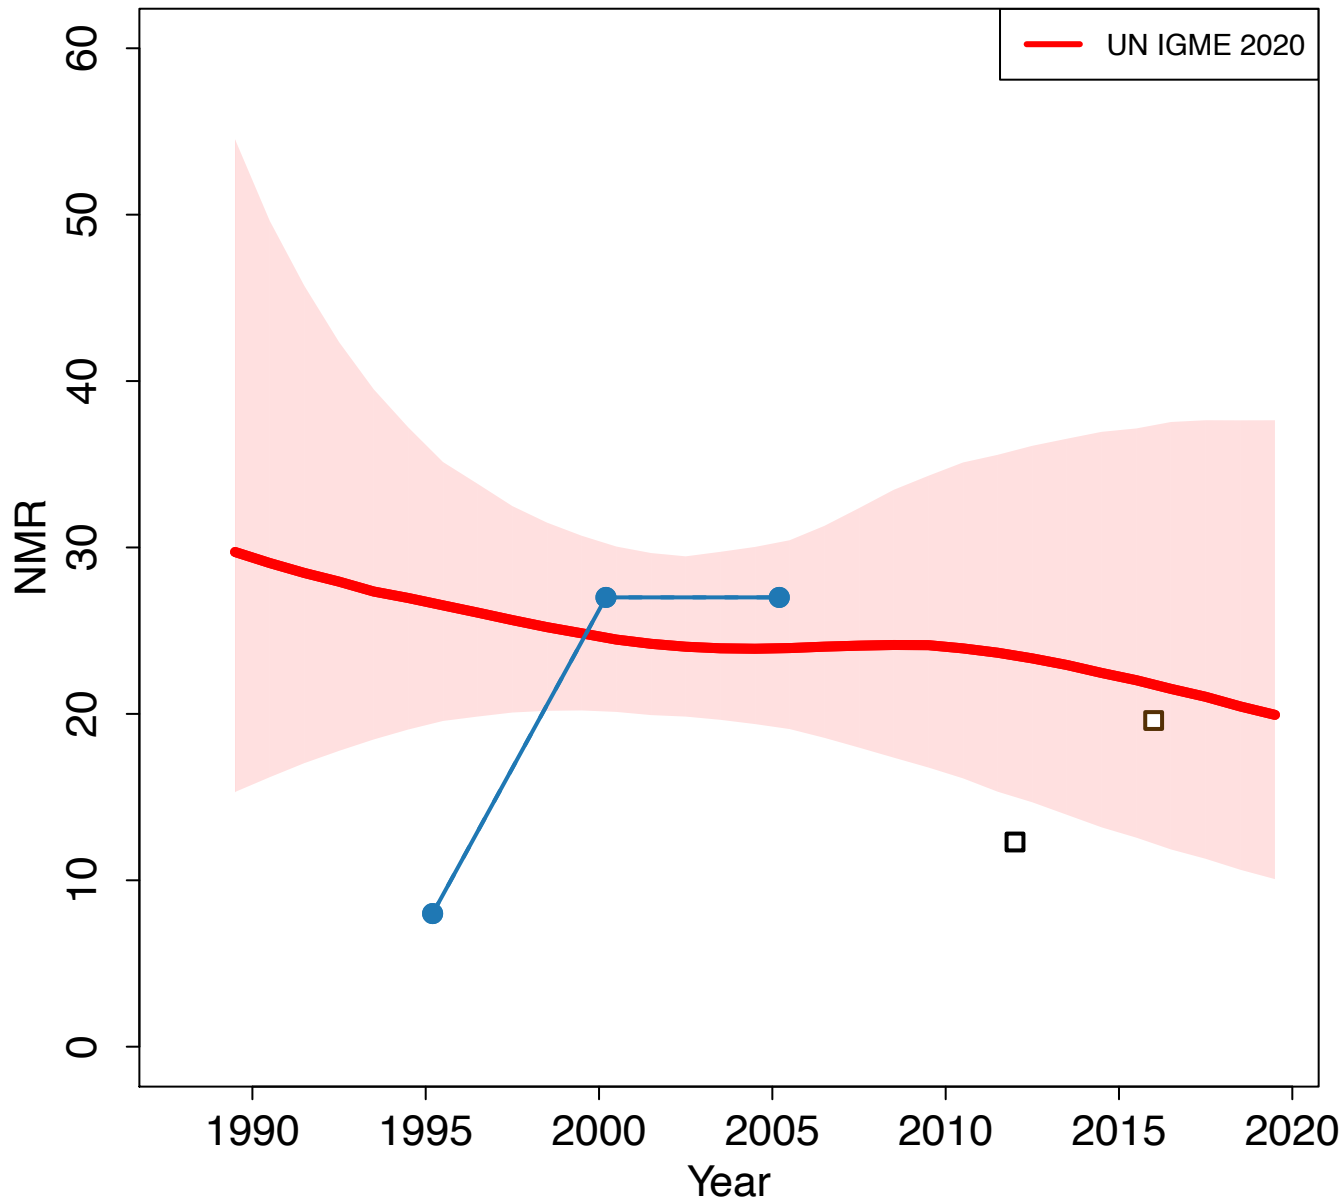

# Zoomed in

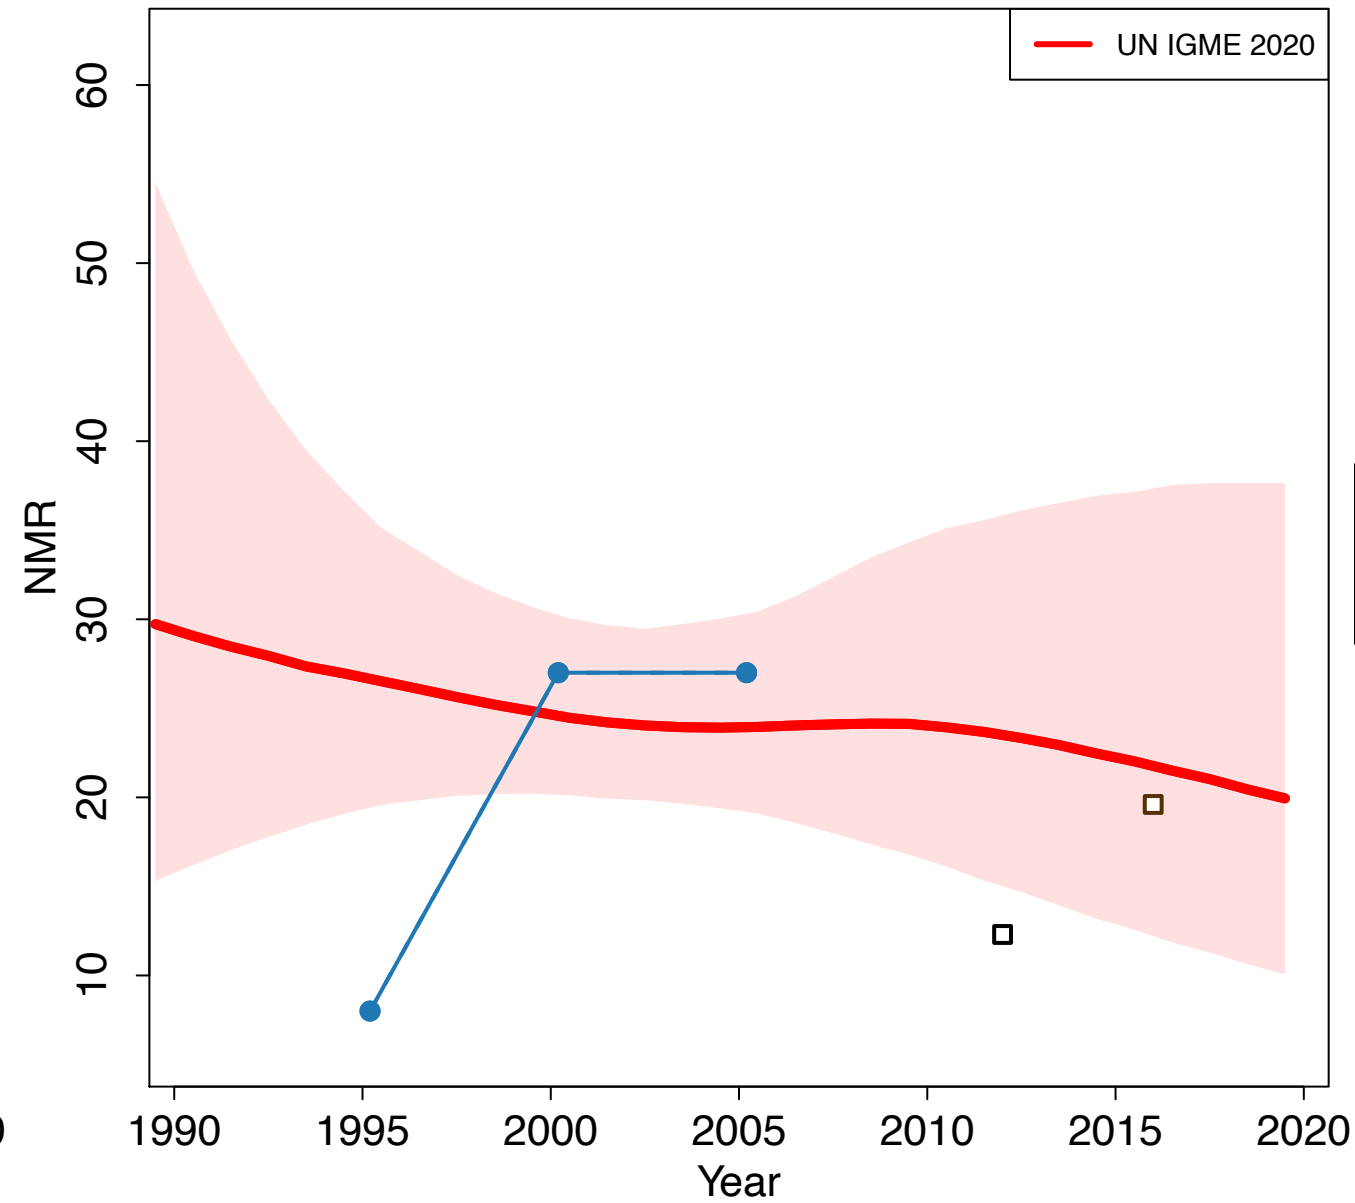

# Nepal

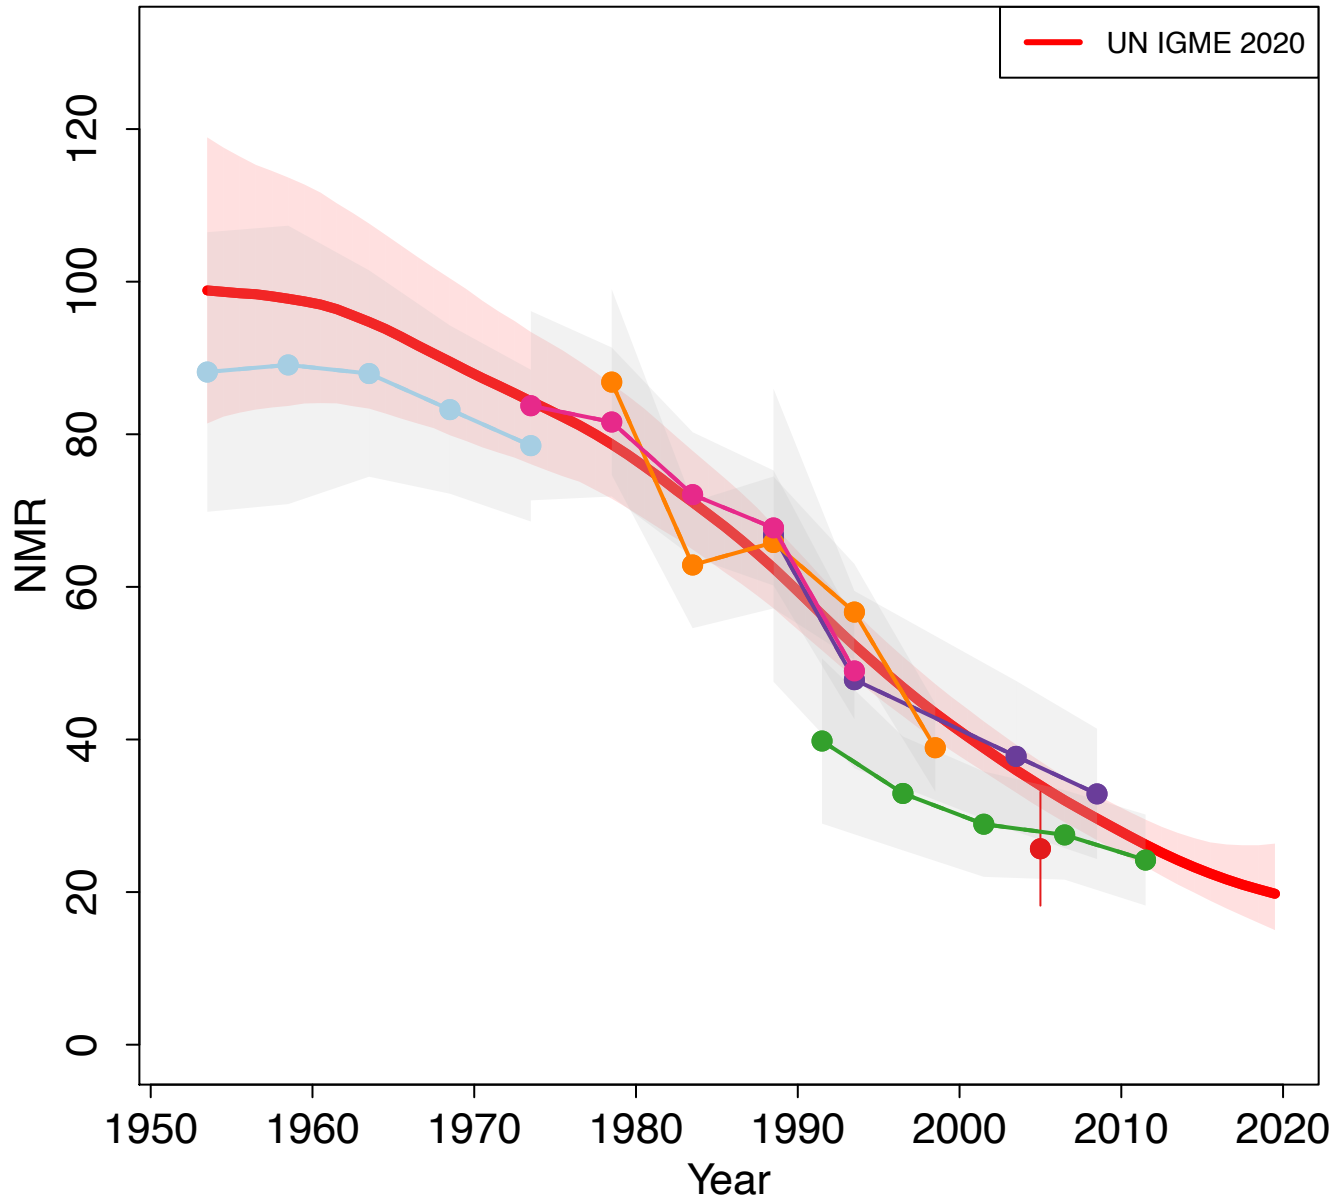

# Zoomed in

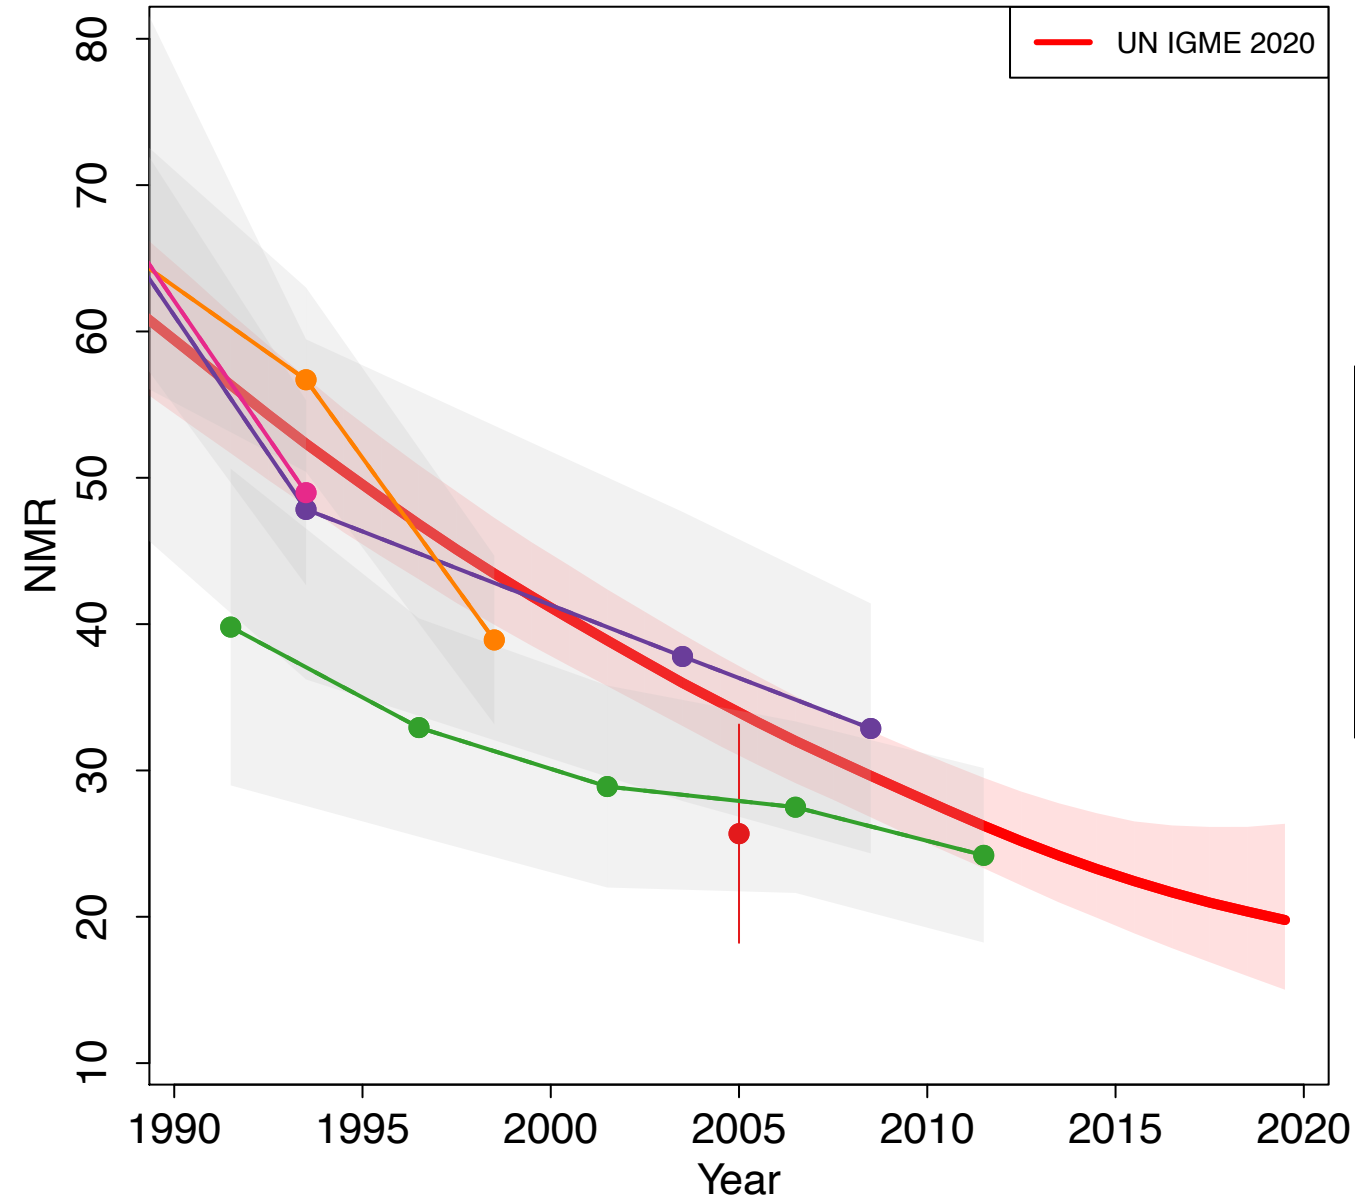

- World Fertility Survey 1976 (Other DHS)
- Demographic and Health Survey 1996 (DHS)
- Demographic and Health Survey 2001 (DHS)
- Demographic and Health Survey 2006 (DHS)
- Demographic and Health Survey 2011 (DHS)
- Multiple Indicator Cluster Survey 2014 (MICS)
- Demographic and Health Survey 2016 (DHS)



# Netherlands

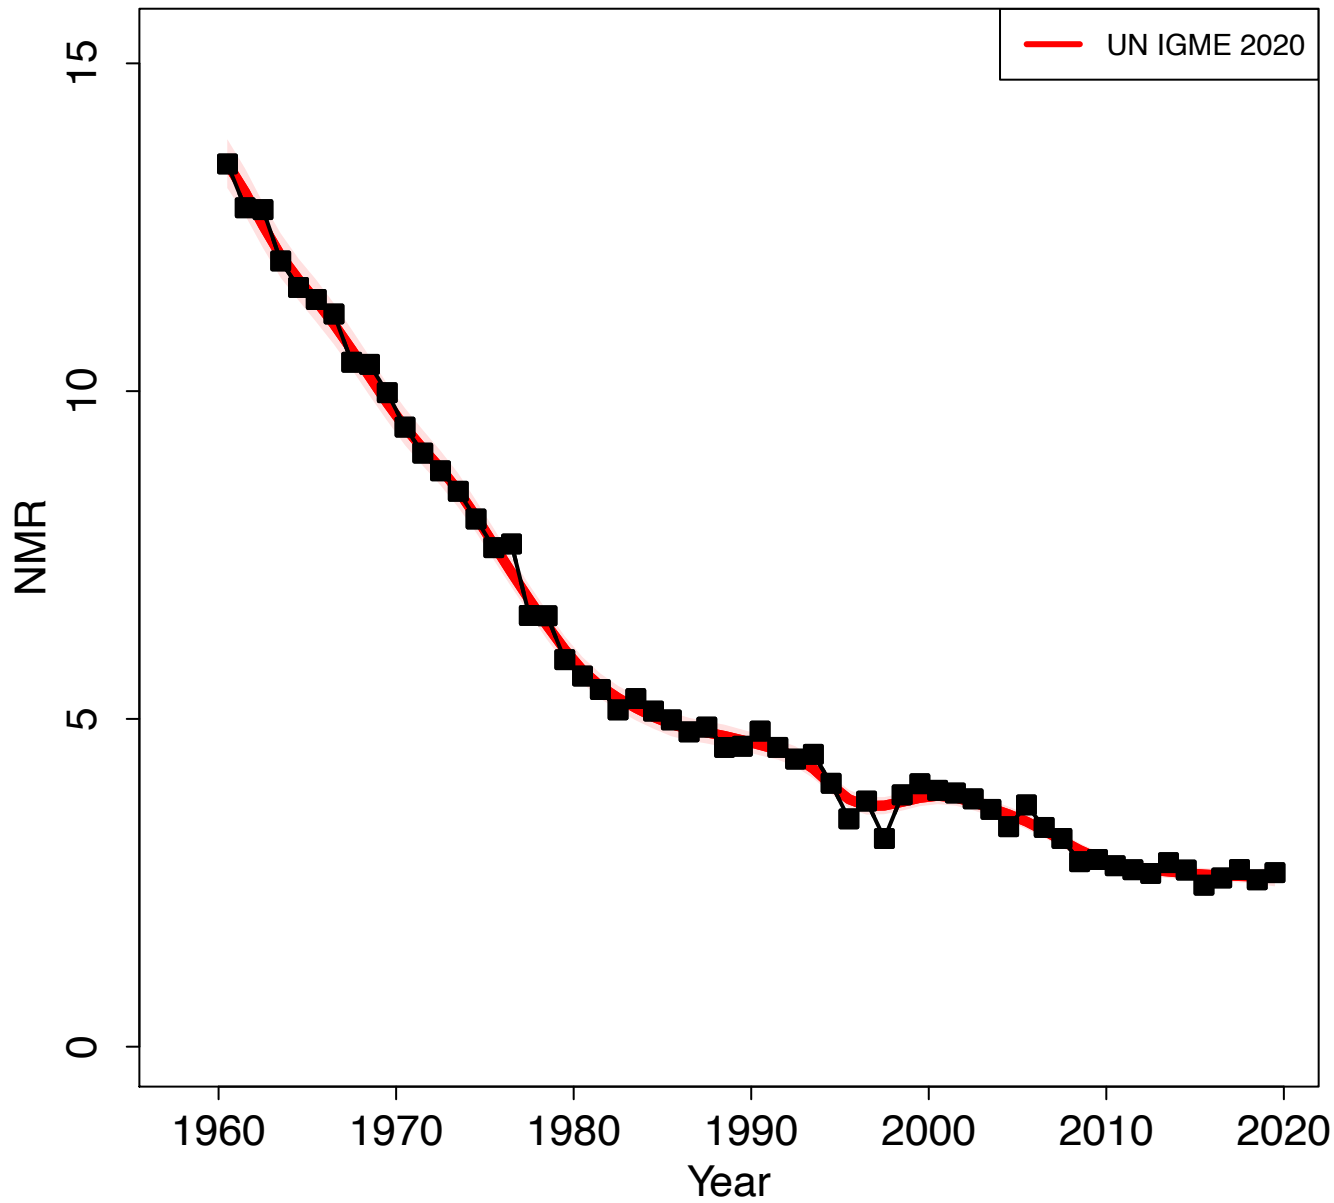

# Zoomed in

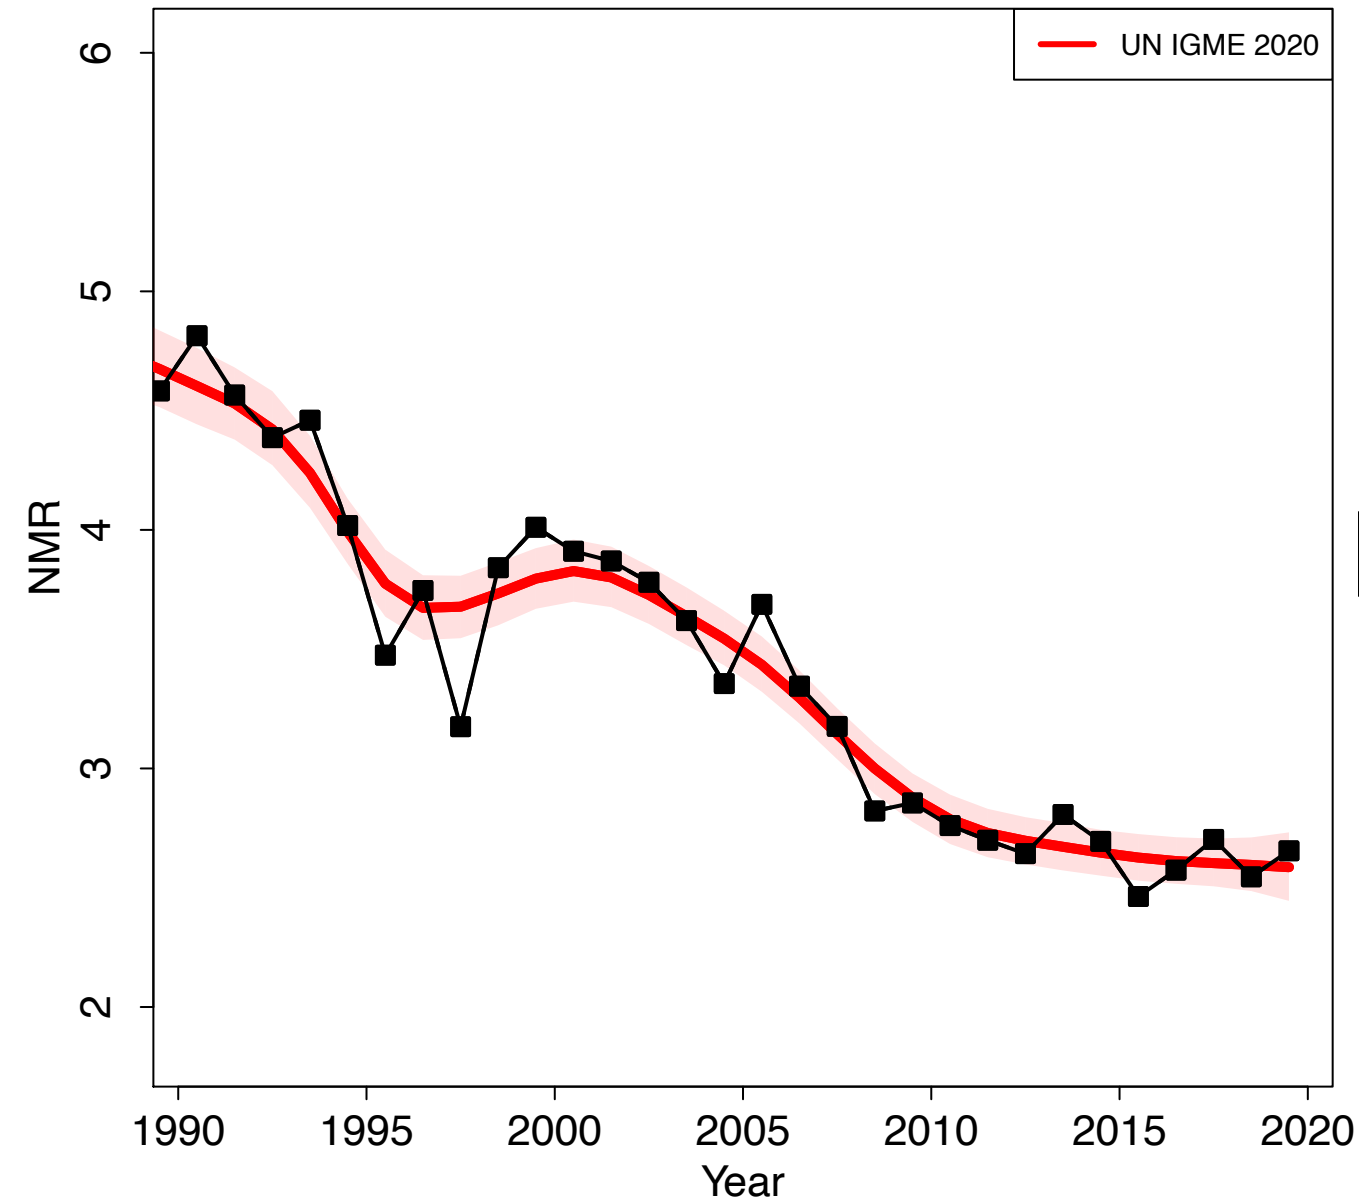

# New Zealand

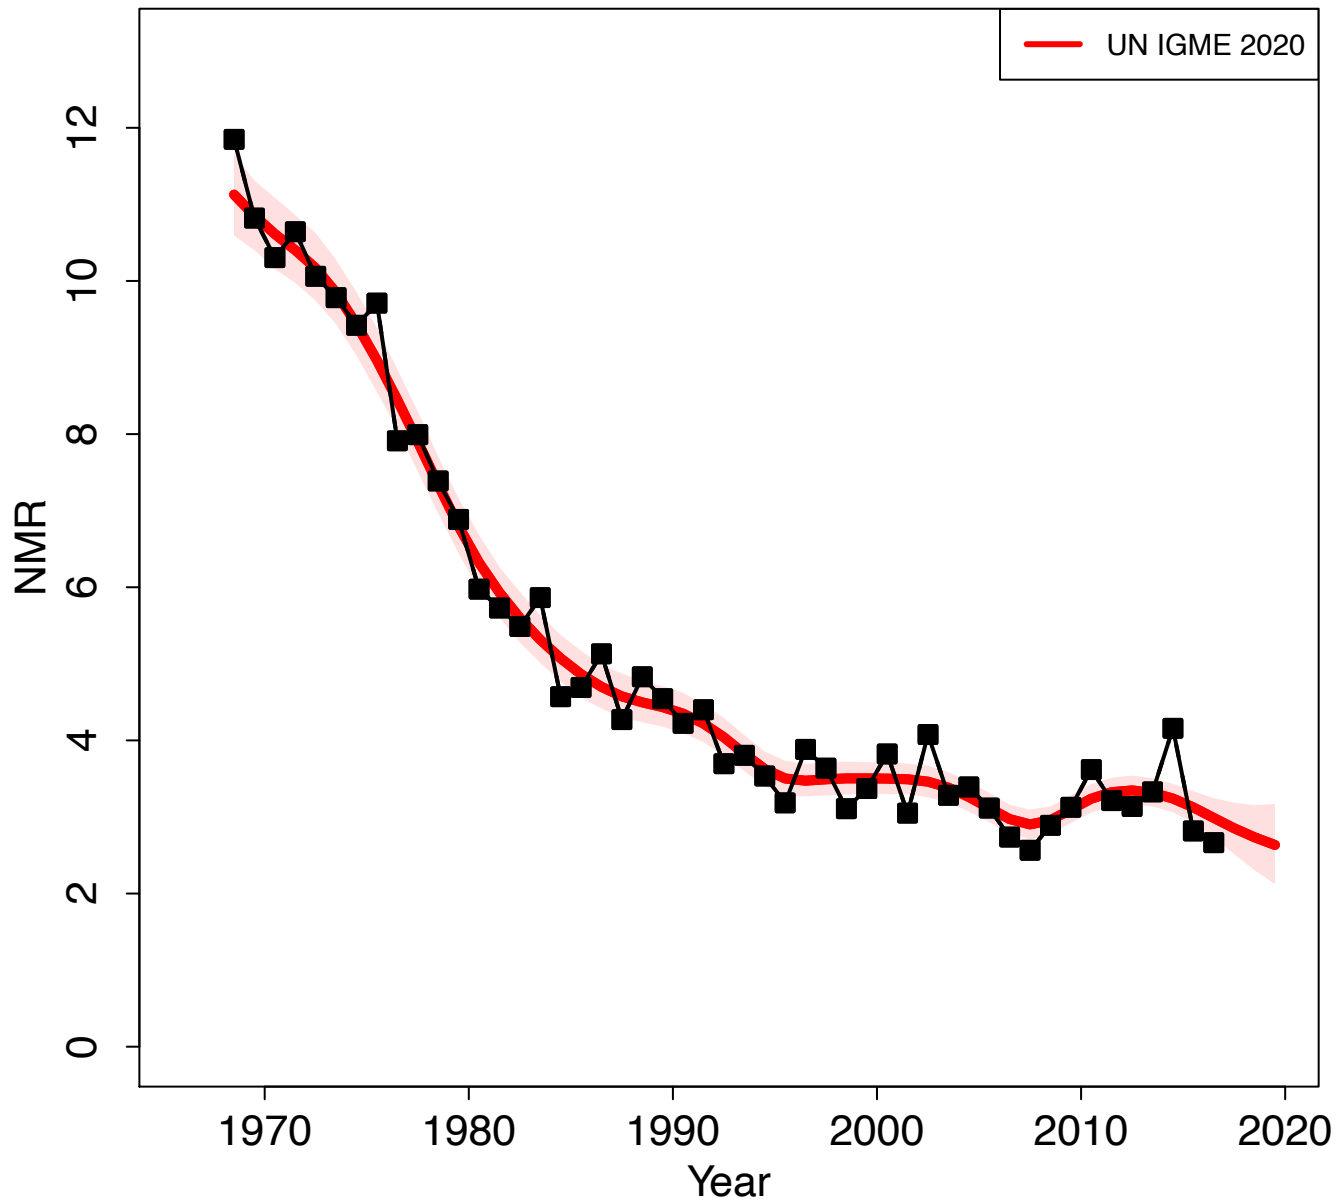

# Zoomed in

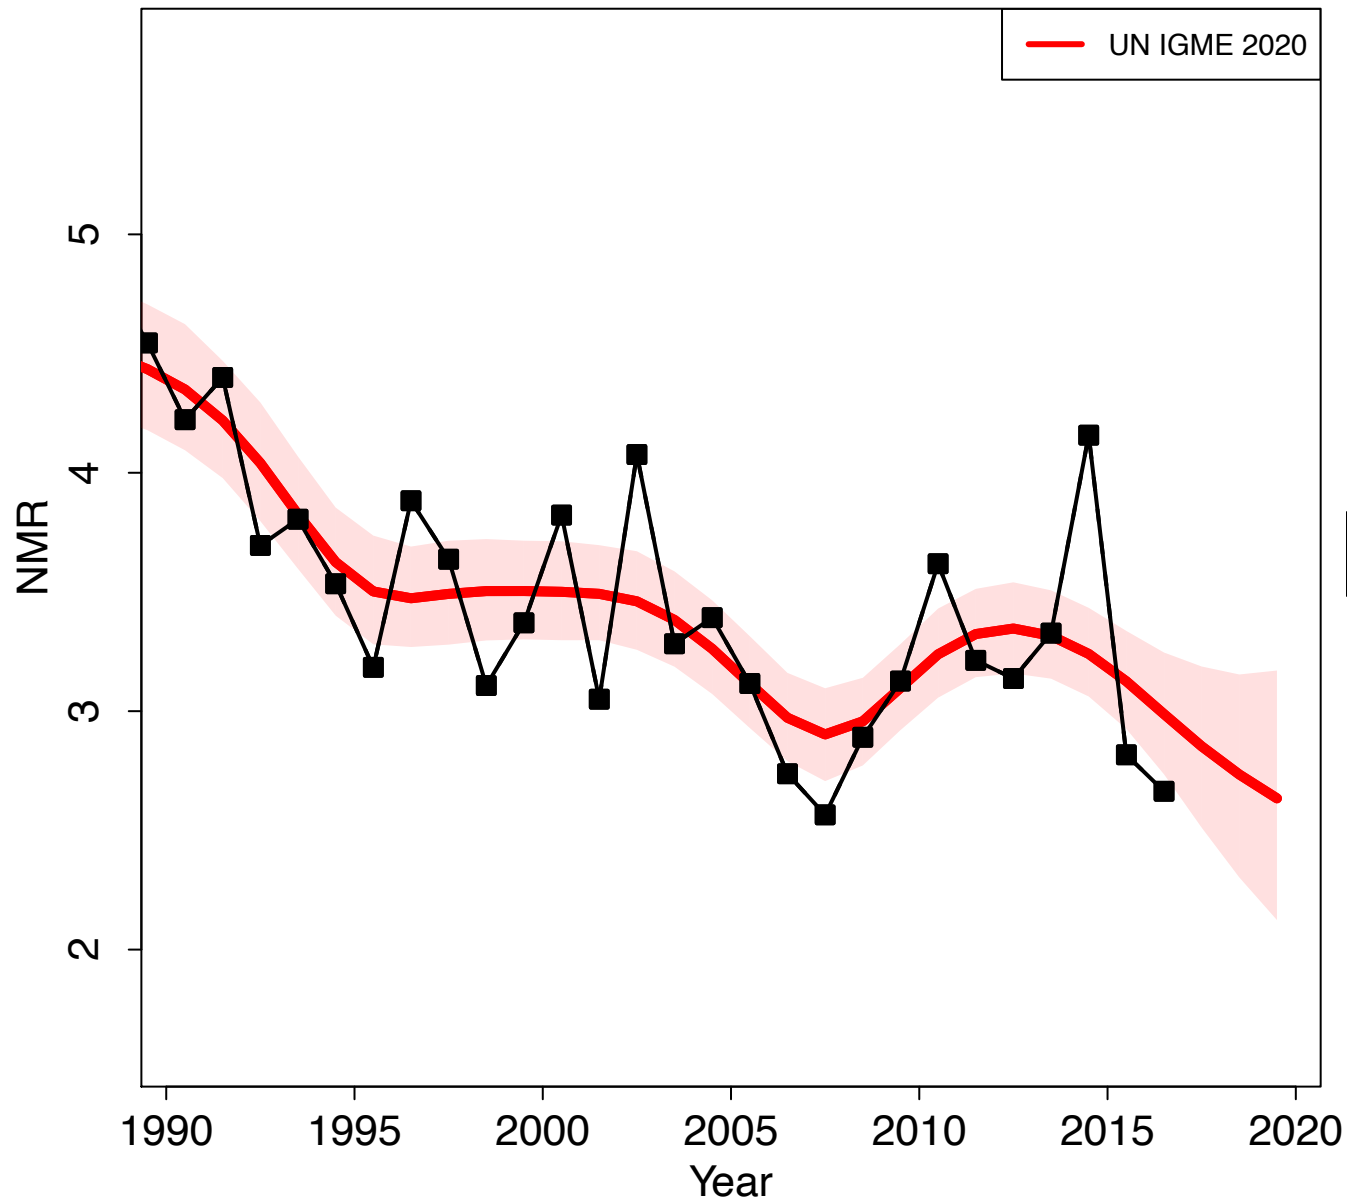

# Nicaragua

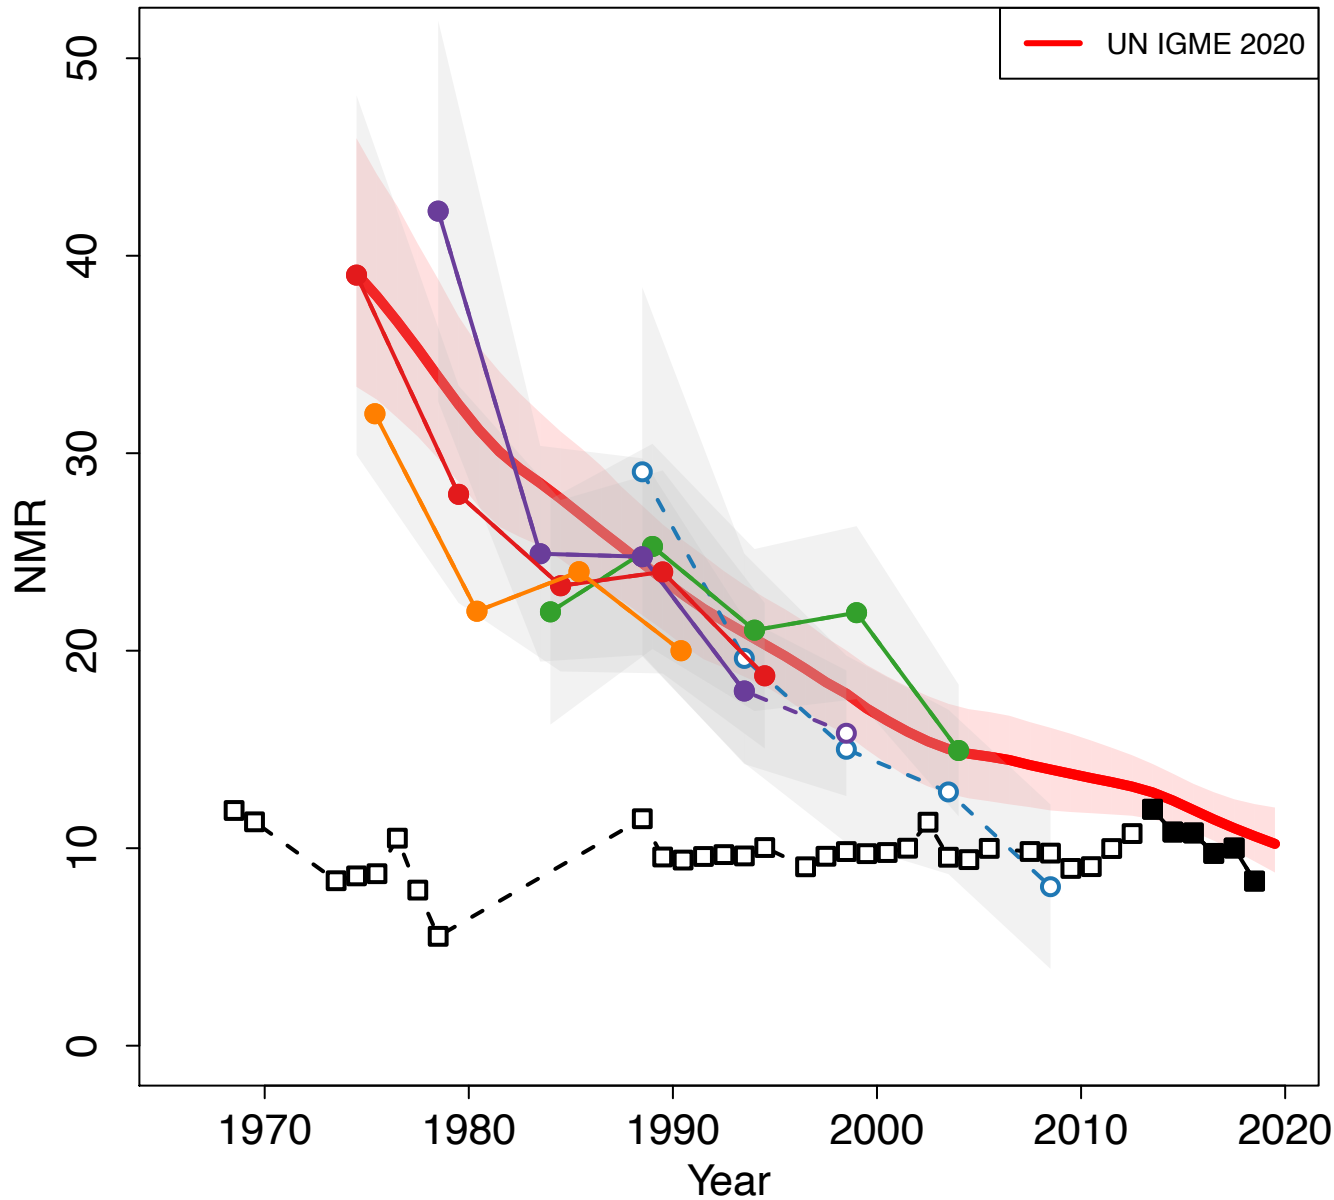

# Zoomed in

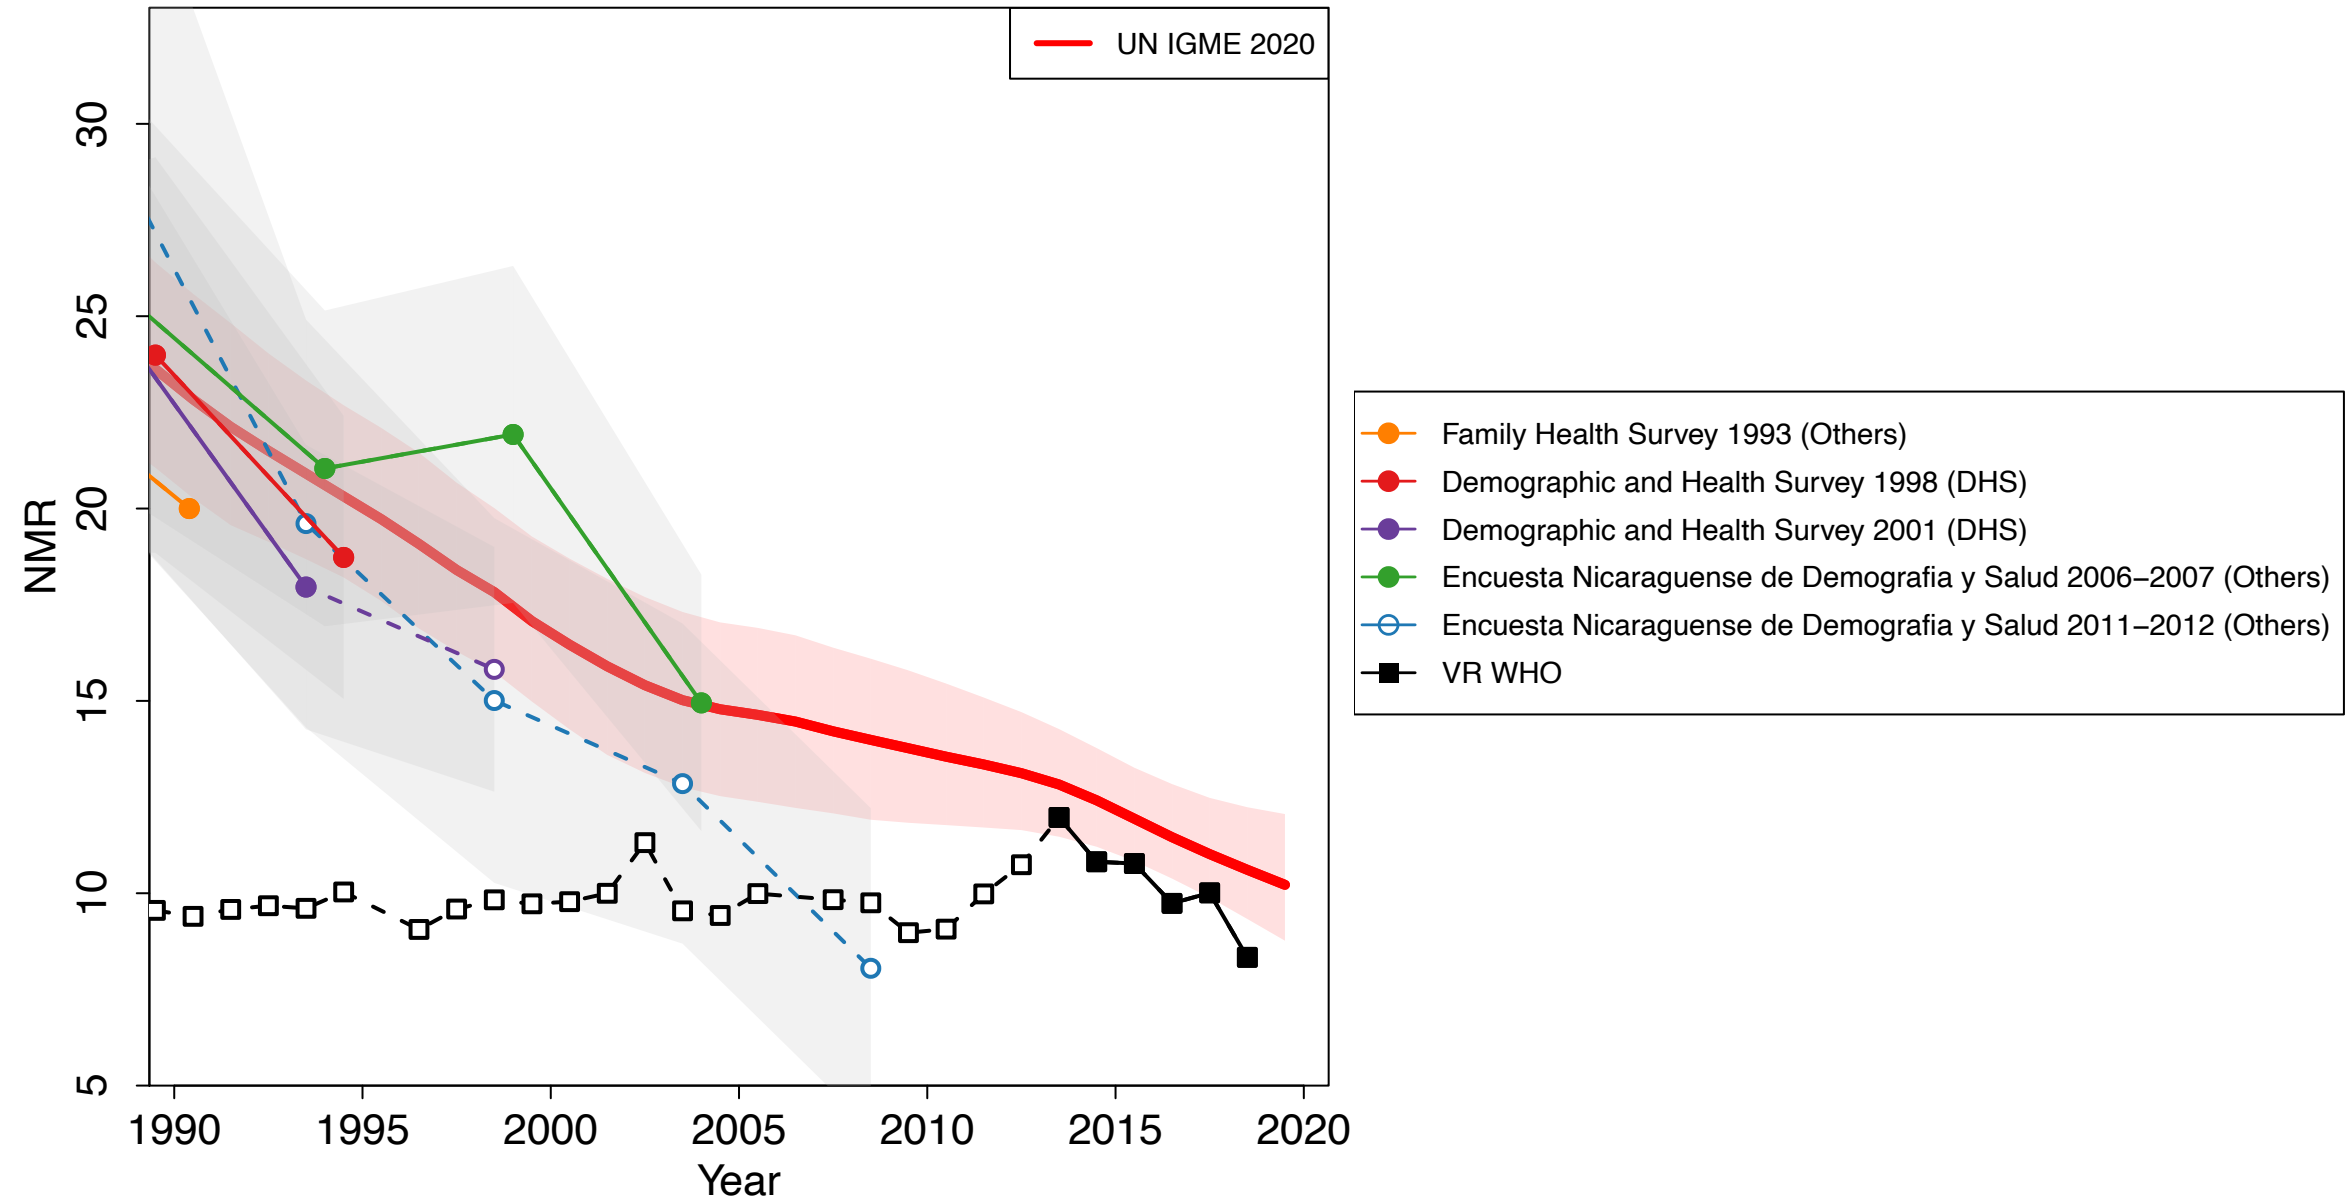

# Niger

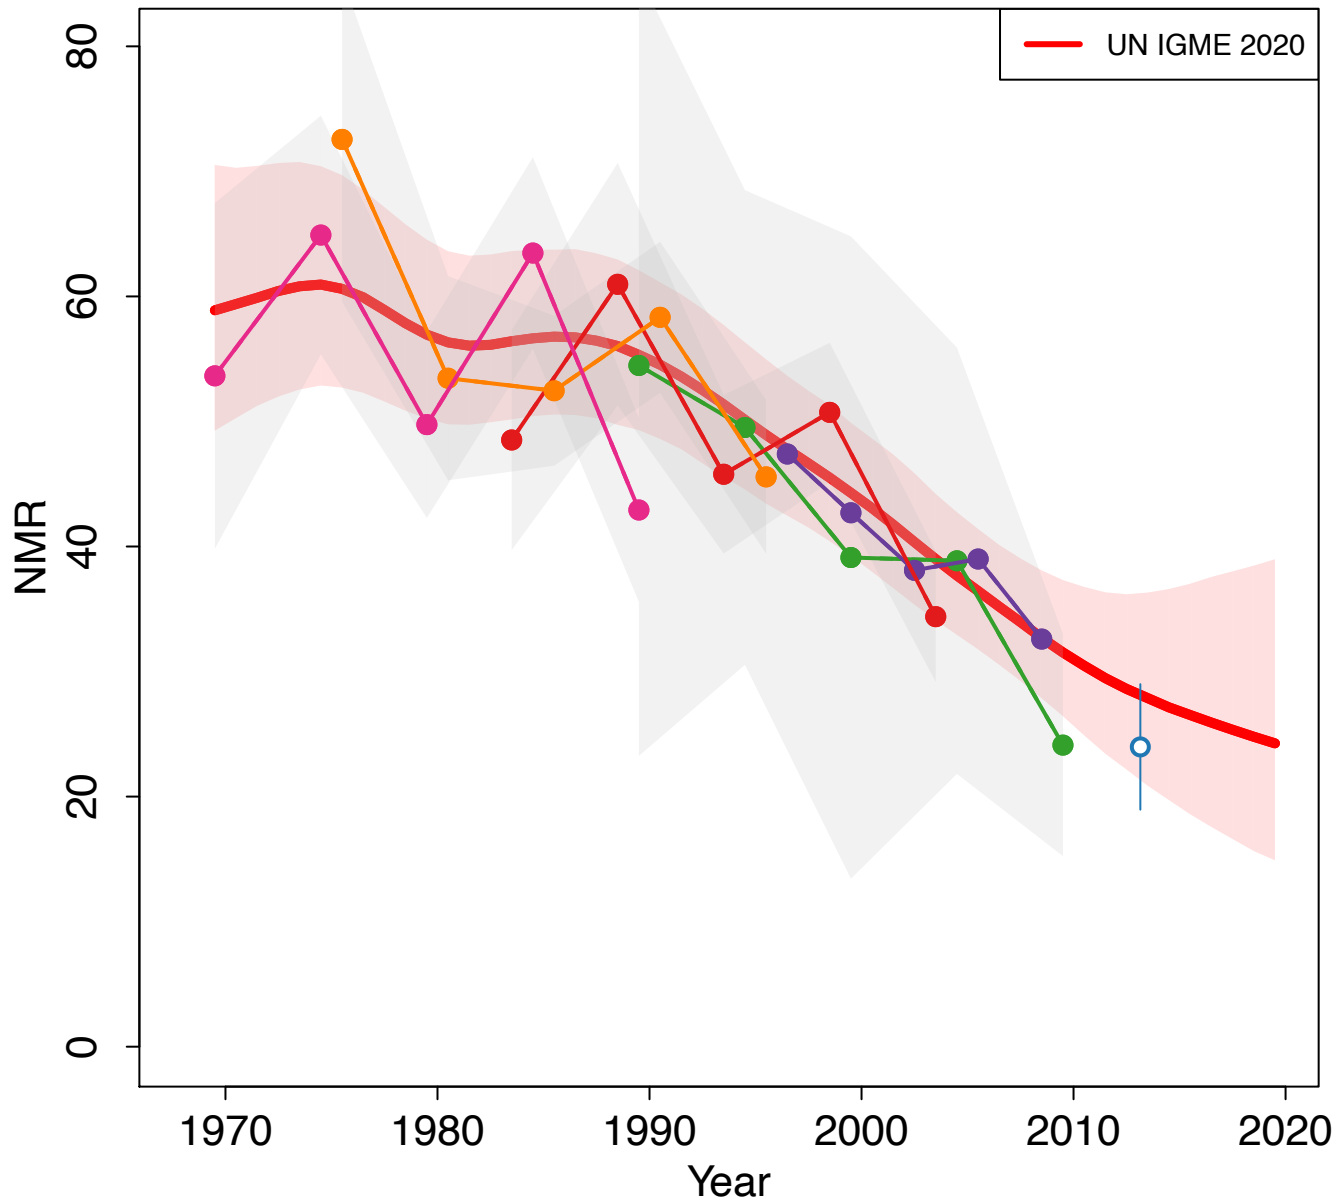

# Zoomed in

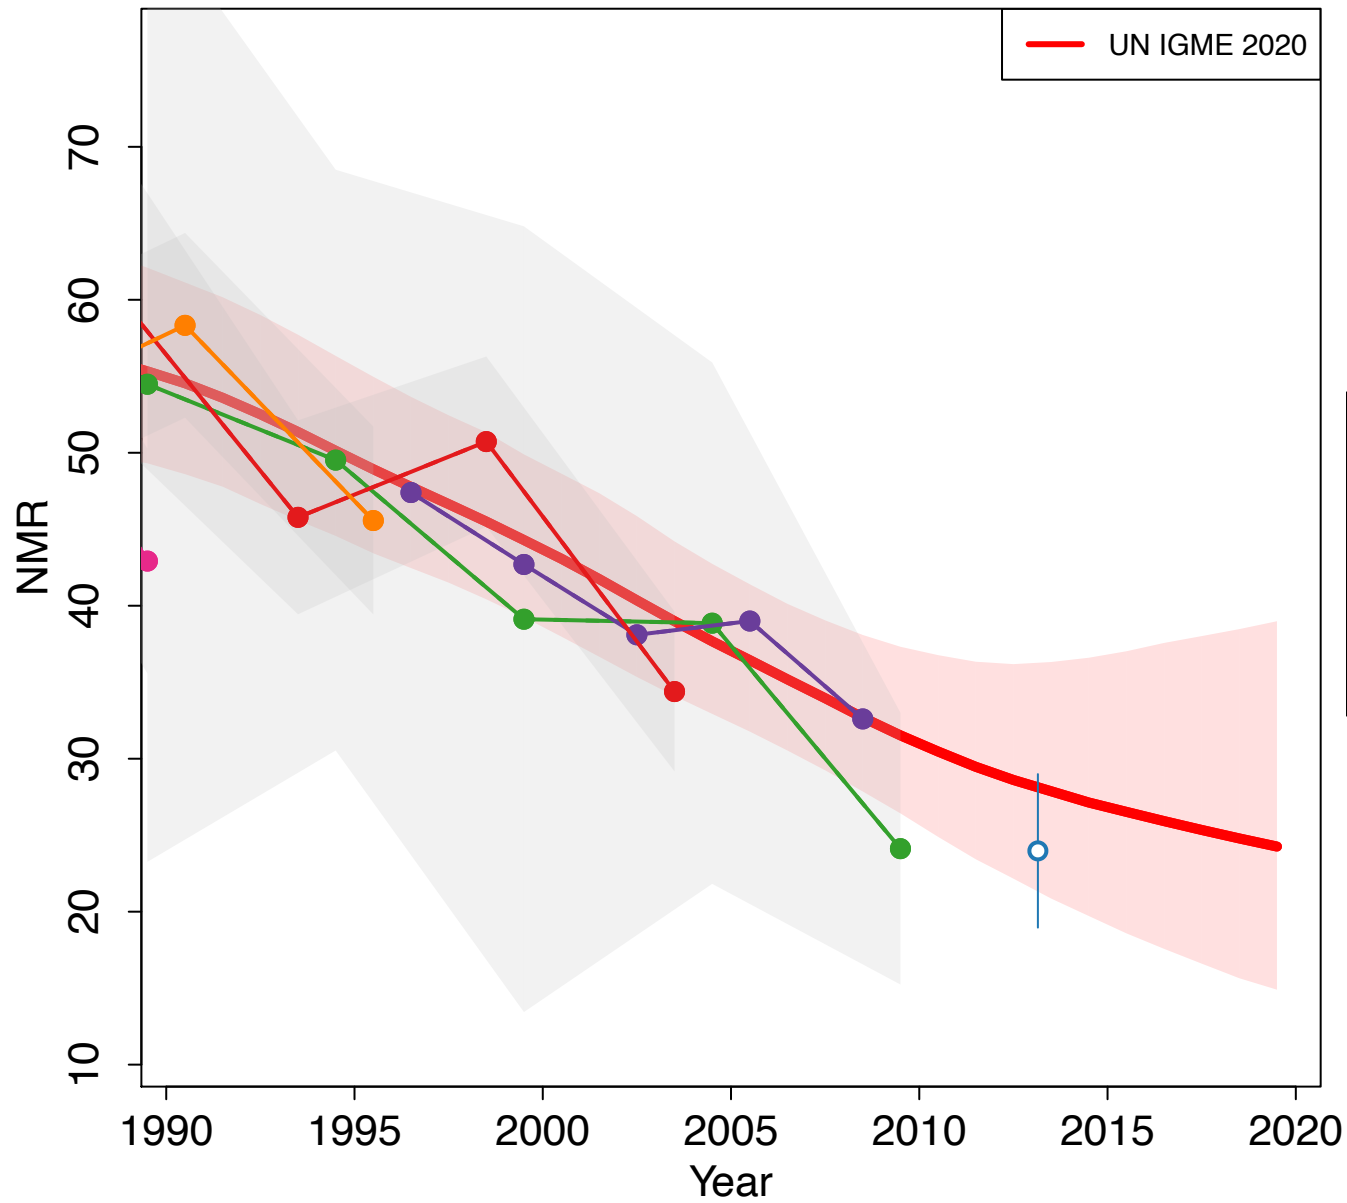

- Demographic and Health Survey 1992 (DHS)
- Demographic and Health Survey 1998 (DHS)
- Demographic and Health Survey 2006 (DHS)
- Child Survival and Mortality Survey New 2010 (Others)
- Demographic and Health Survey 2012 (DHS)
- Etude Nationale d'Evaluation des Indicateurs Socioeconomiques et Demographiques (Preliminary)

# Nigeria

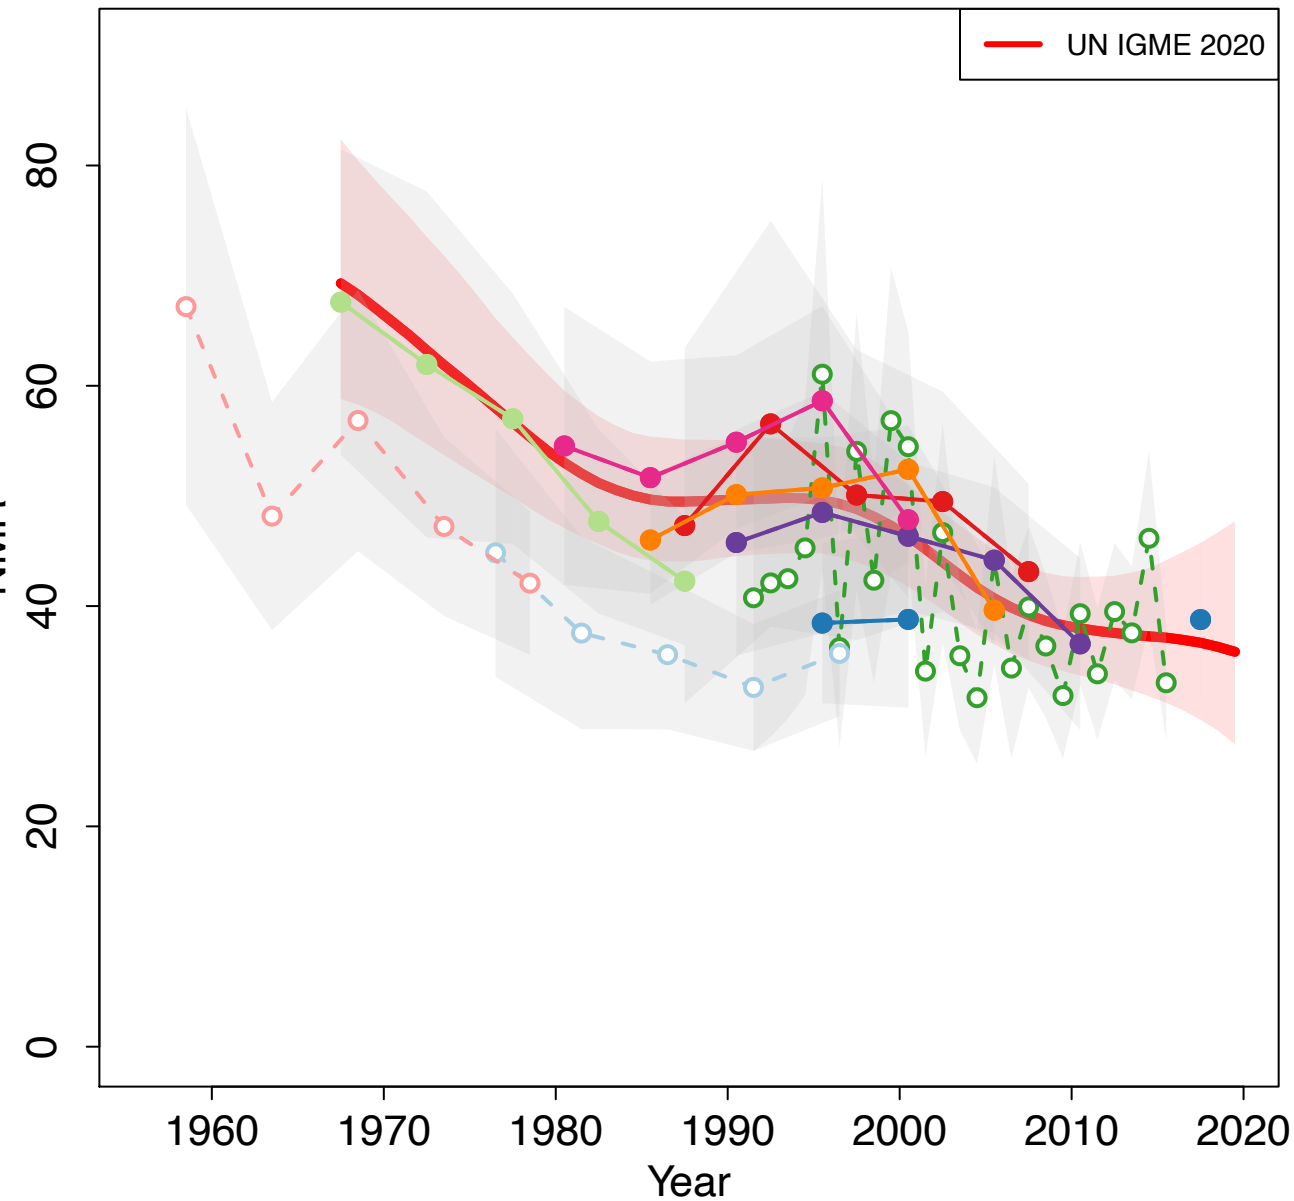

# Zoomed in

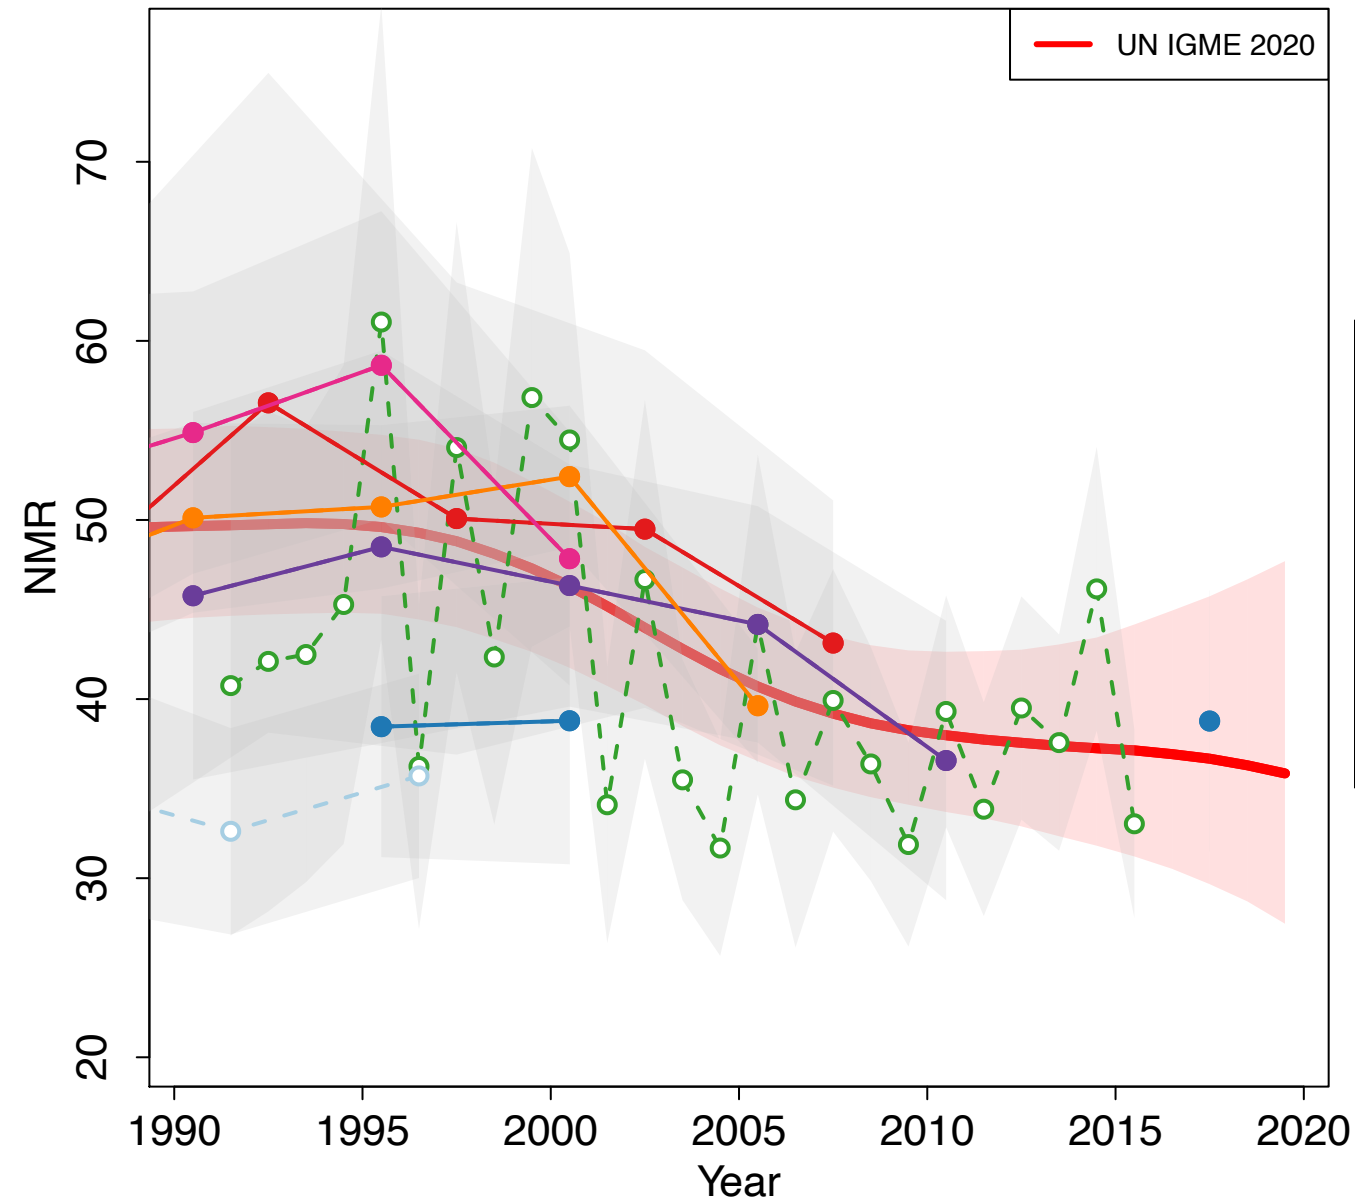

- World Fertility Survey 1981-1982 (Other DHS)
- Demographic and Health Survey 1990 (DHS)
- Demographic and Health Survey 1999 (Other DHS)
- Demographic and Health Survey 2003 (DHS)
- Demographic and Health Survey 2008 (DHS)
- Malaria Indicator Survey 2010 (Other DHS)
- Demographic and Health Survey 2013 (DHS)
- Multiple Indicator Cluster Survey 2016-2017 (MICS)
- Demographic and Health Survey 2018 (DHS)

# Niue

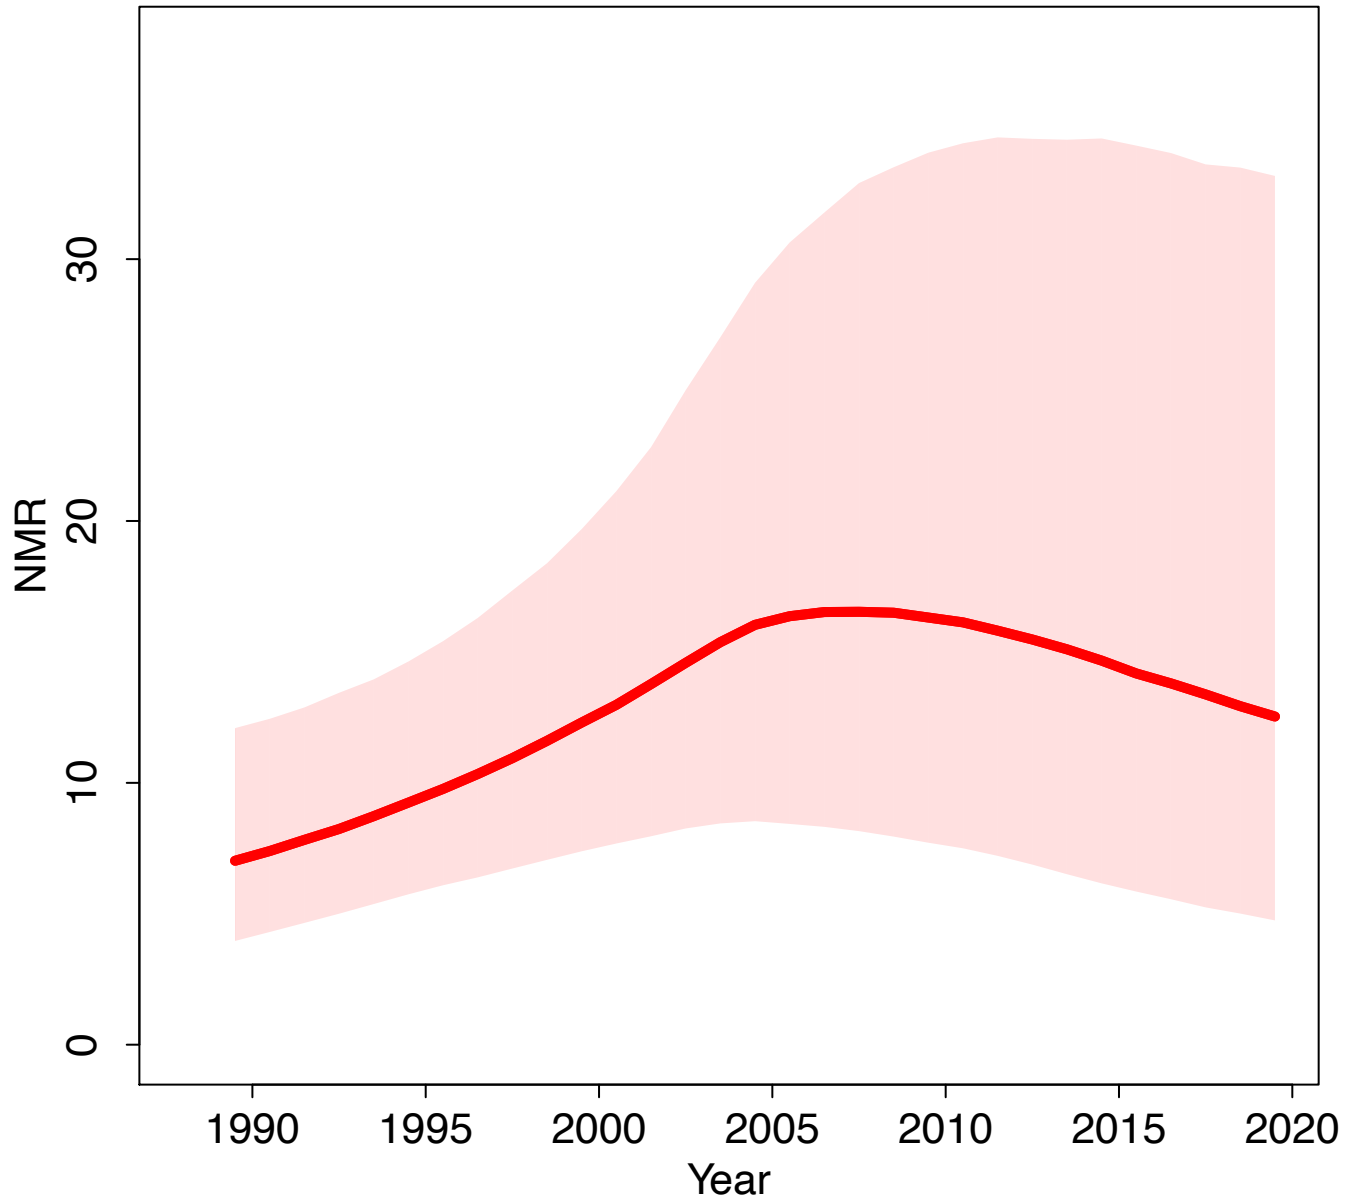

# Zoomed in

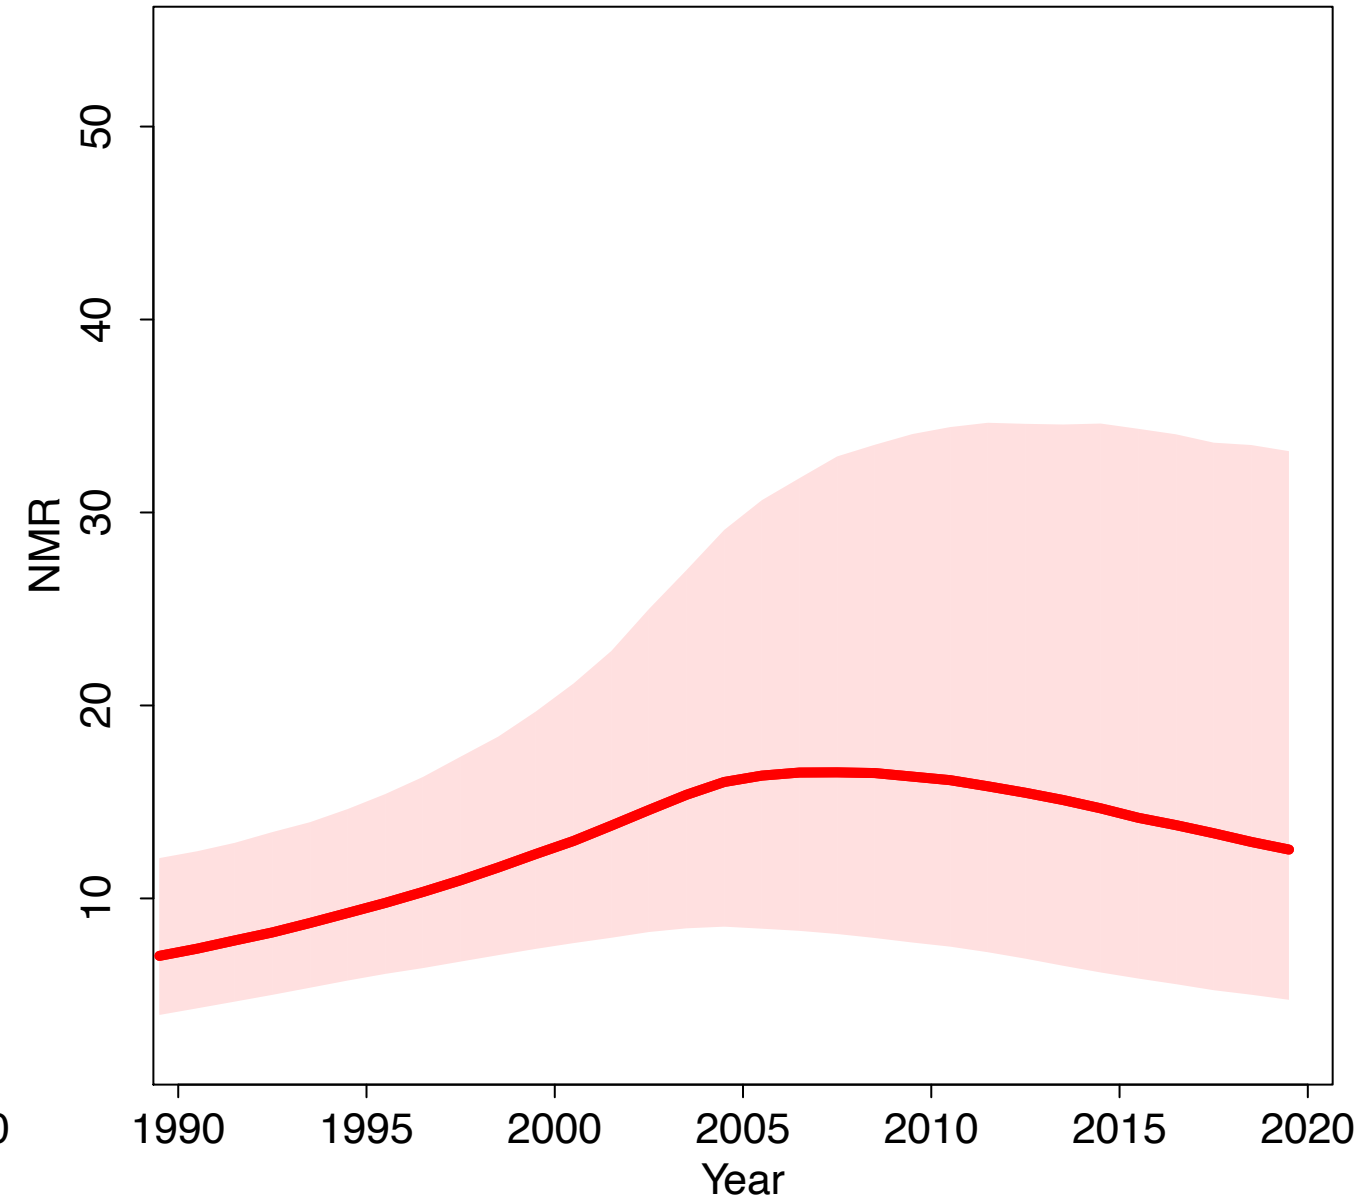

# Norway

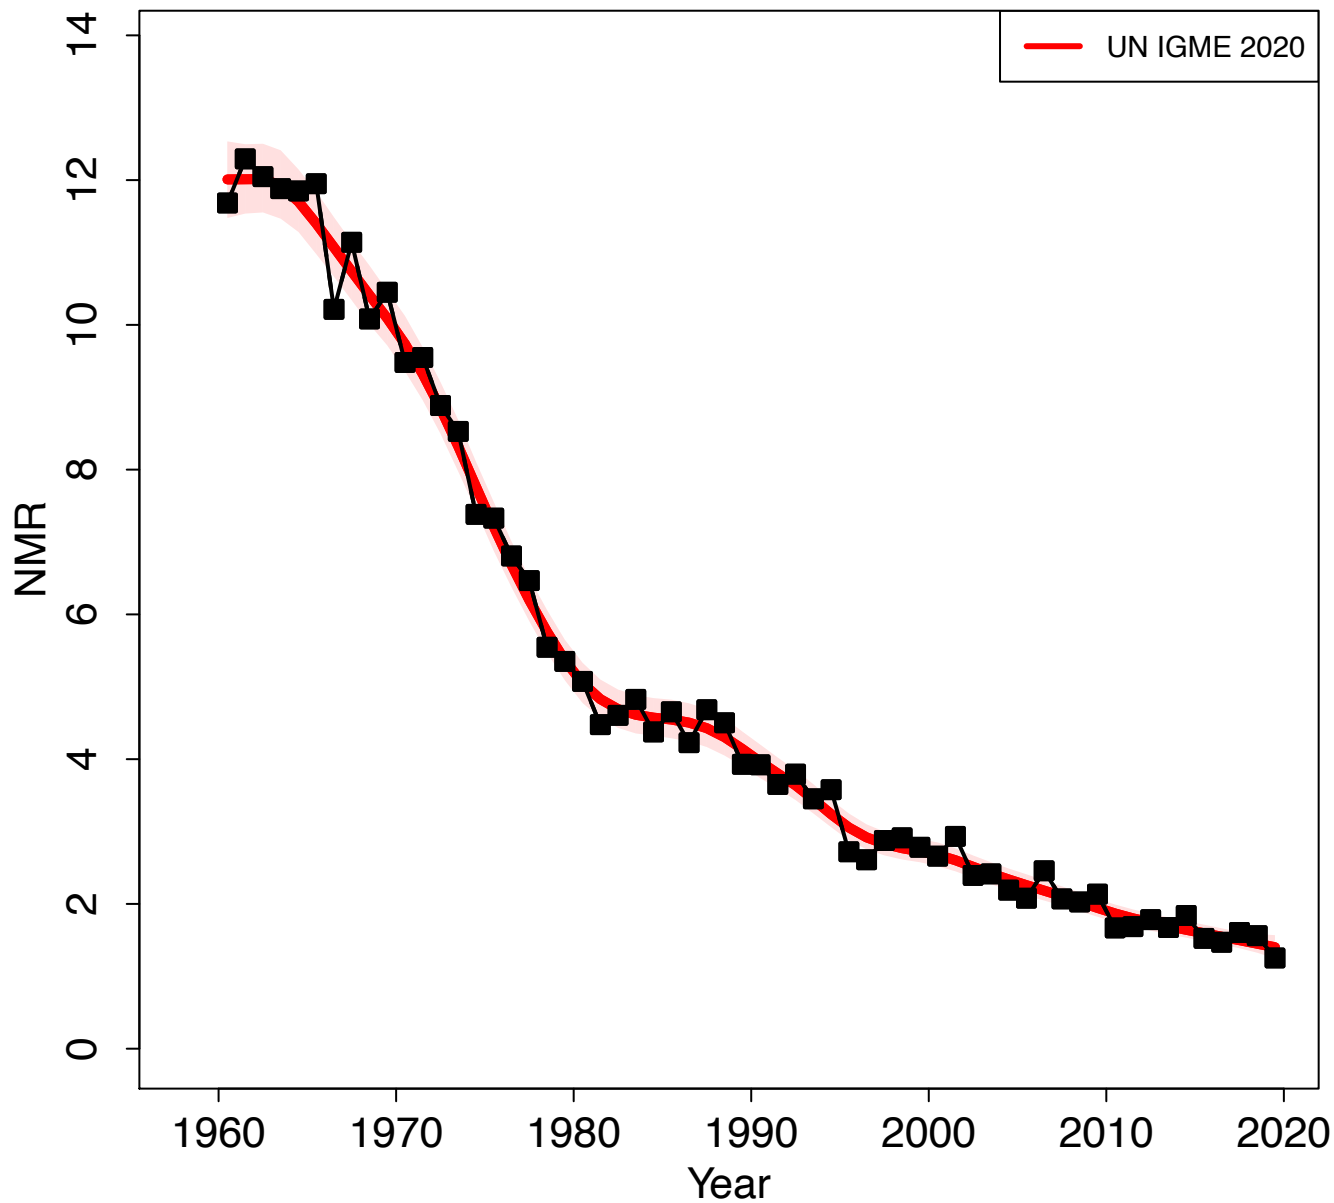

# Zoomed in

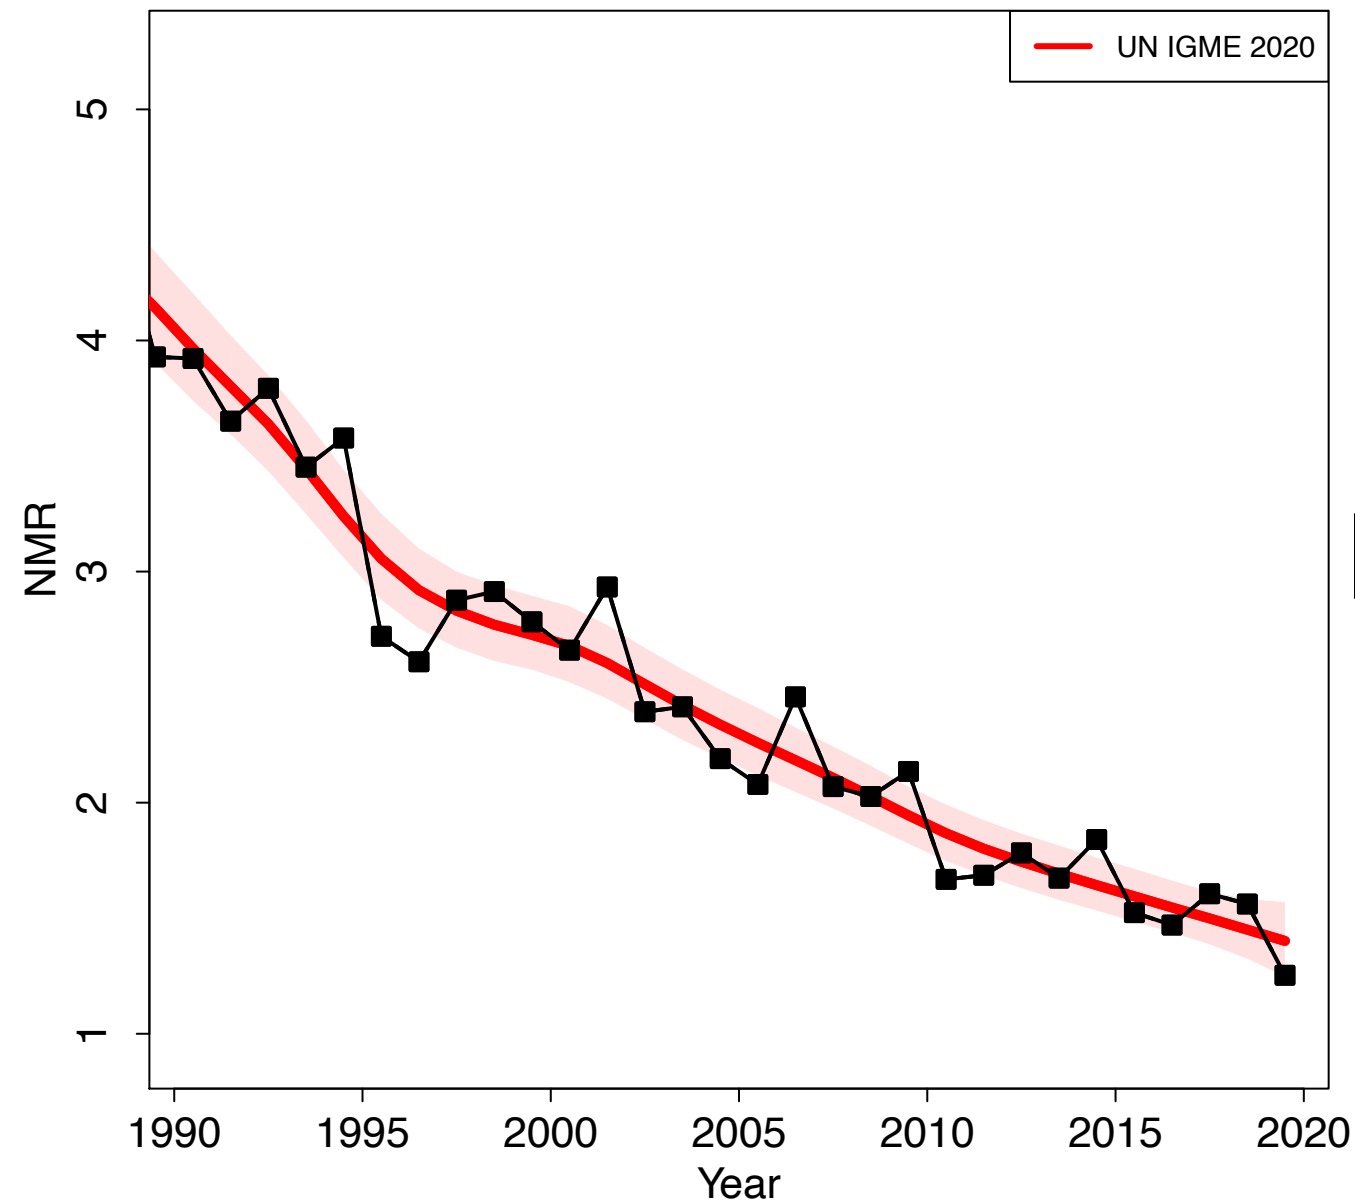

# Oman

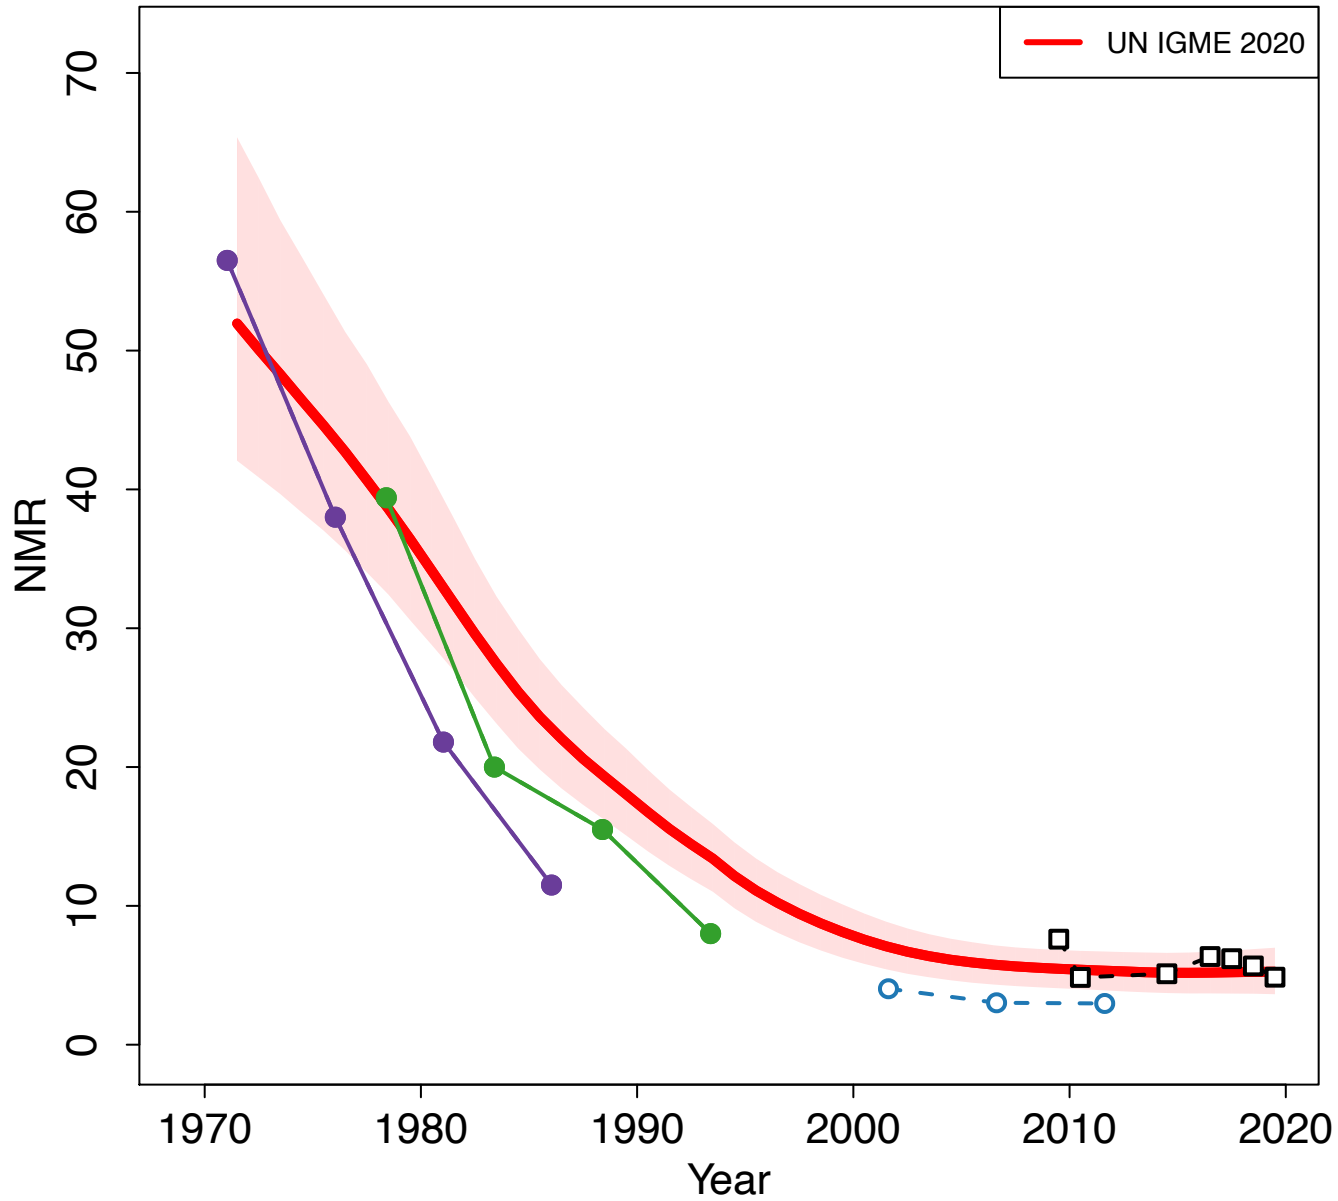

# Zoomed in

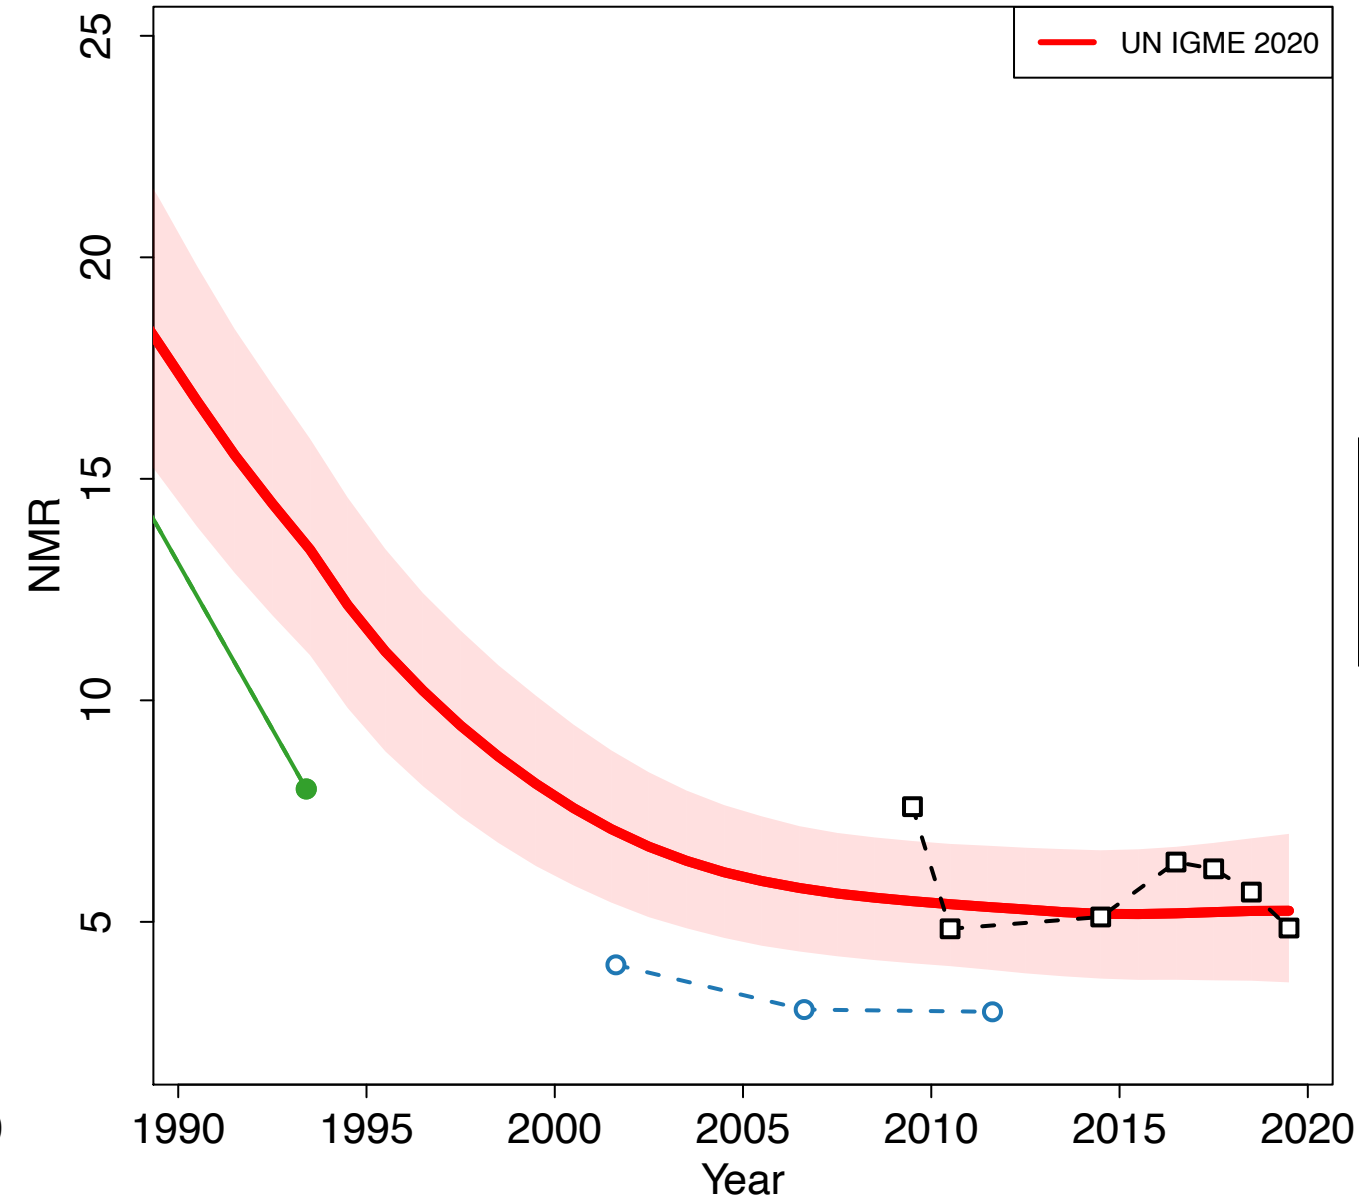





# Palau

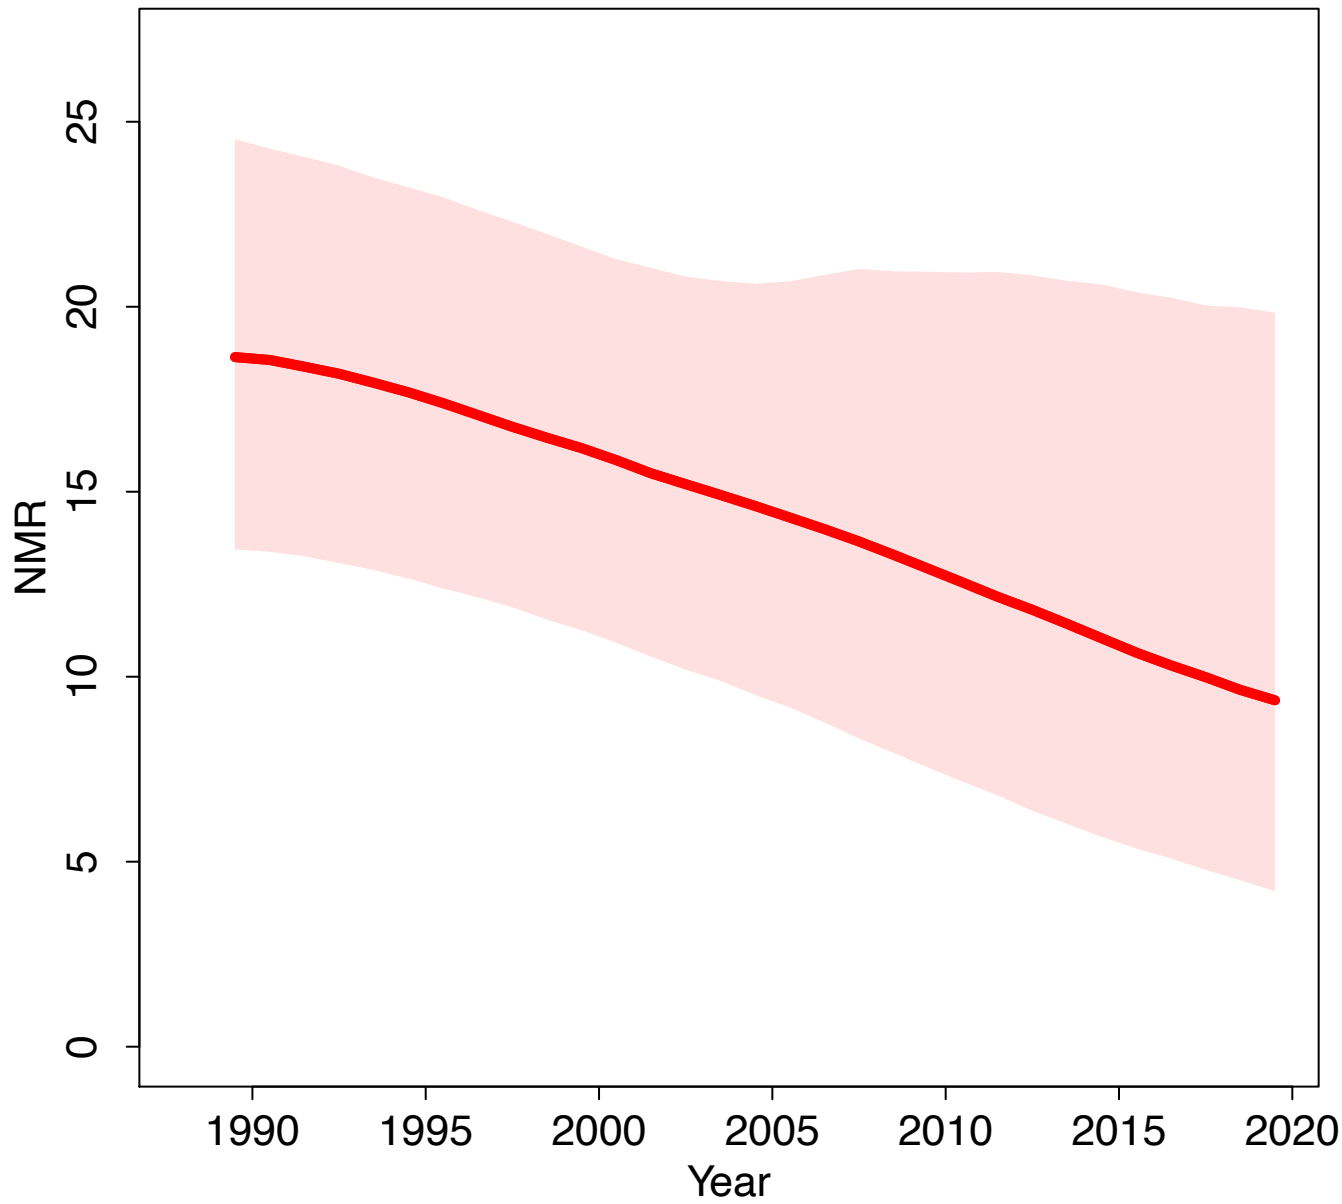

# Zoomed in

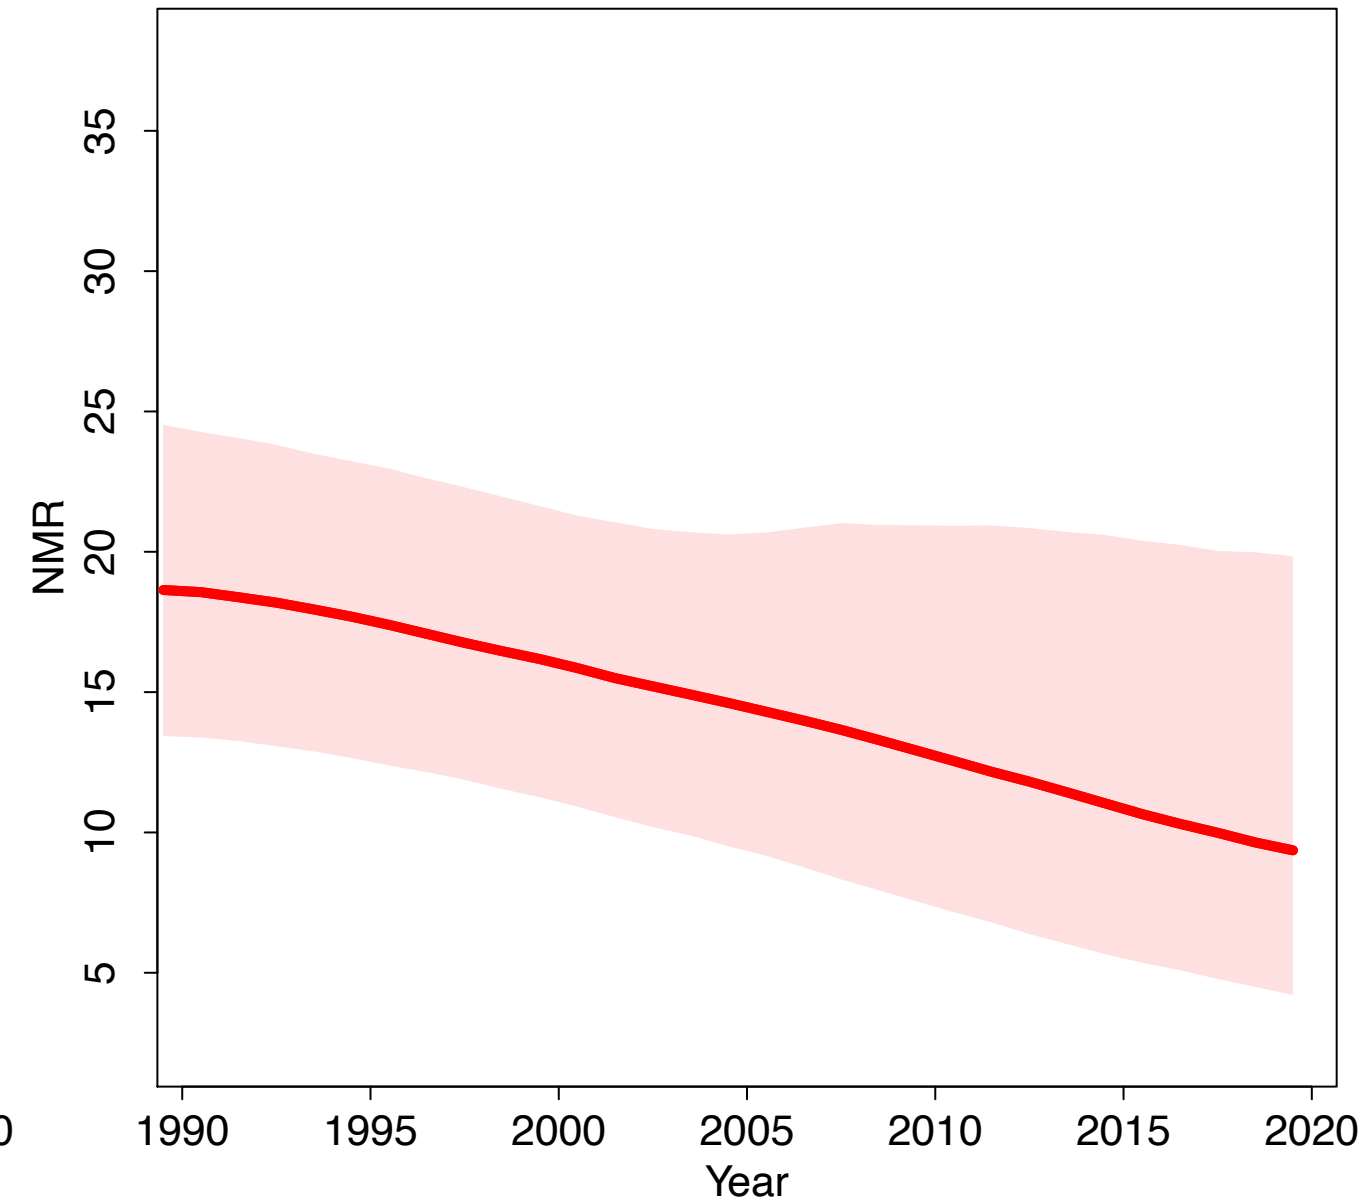

# Panama

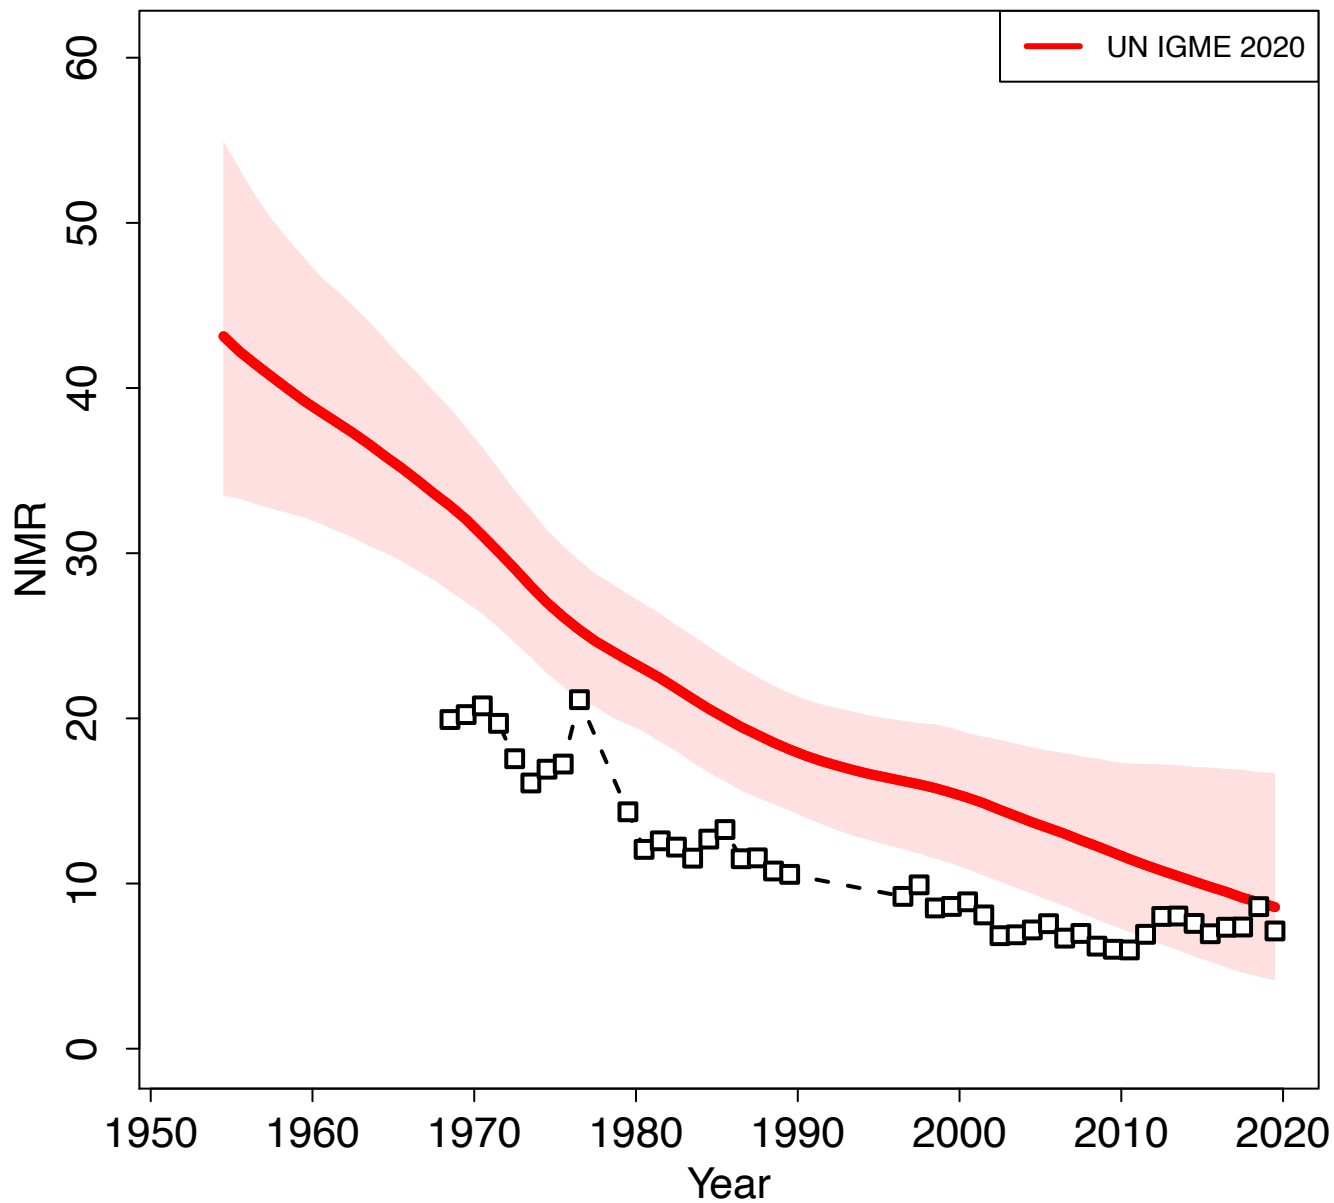

# Zoomed in

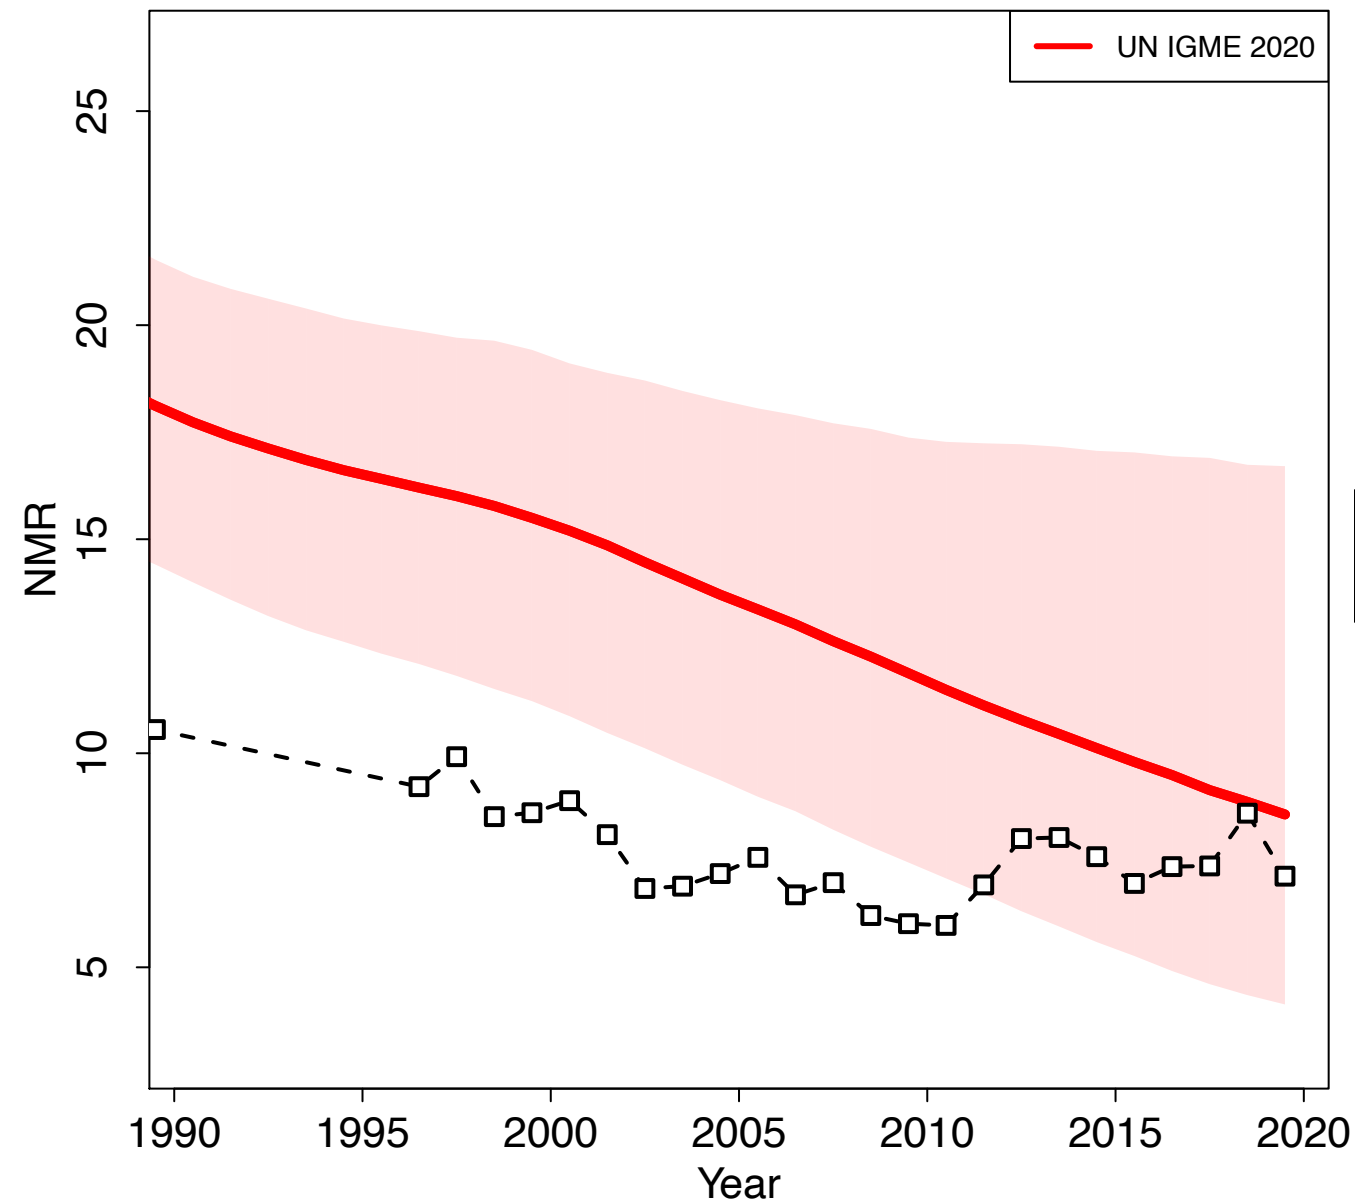

# Papua New Guinea

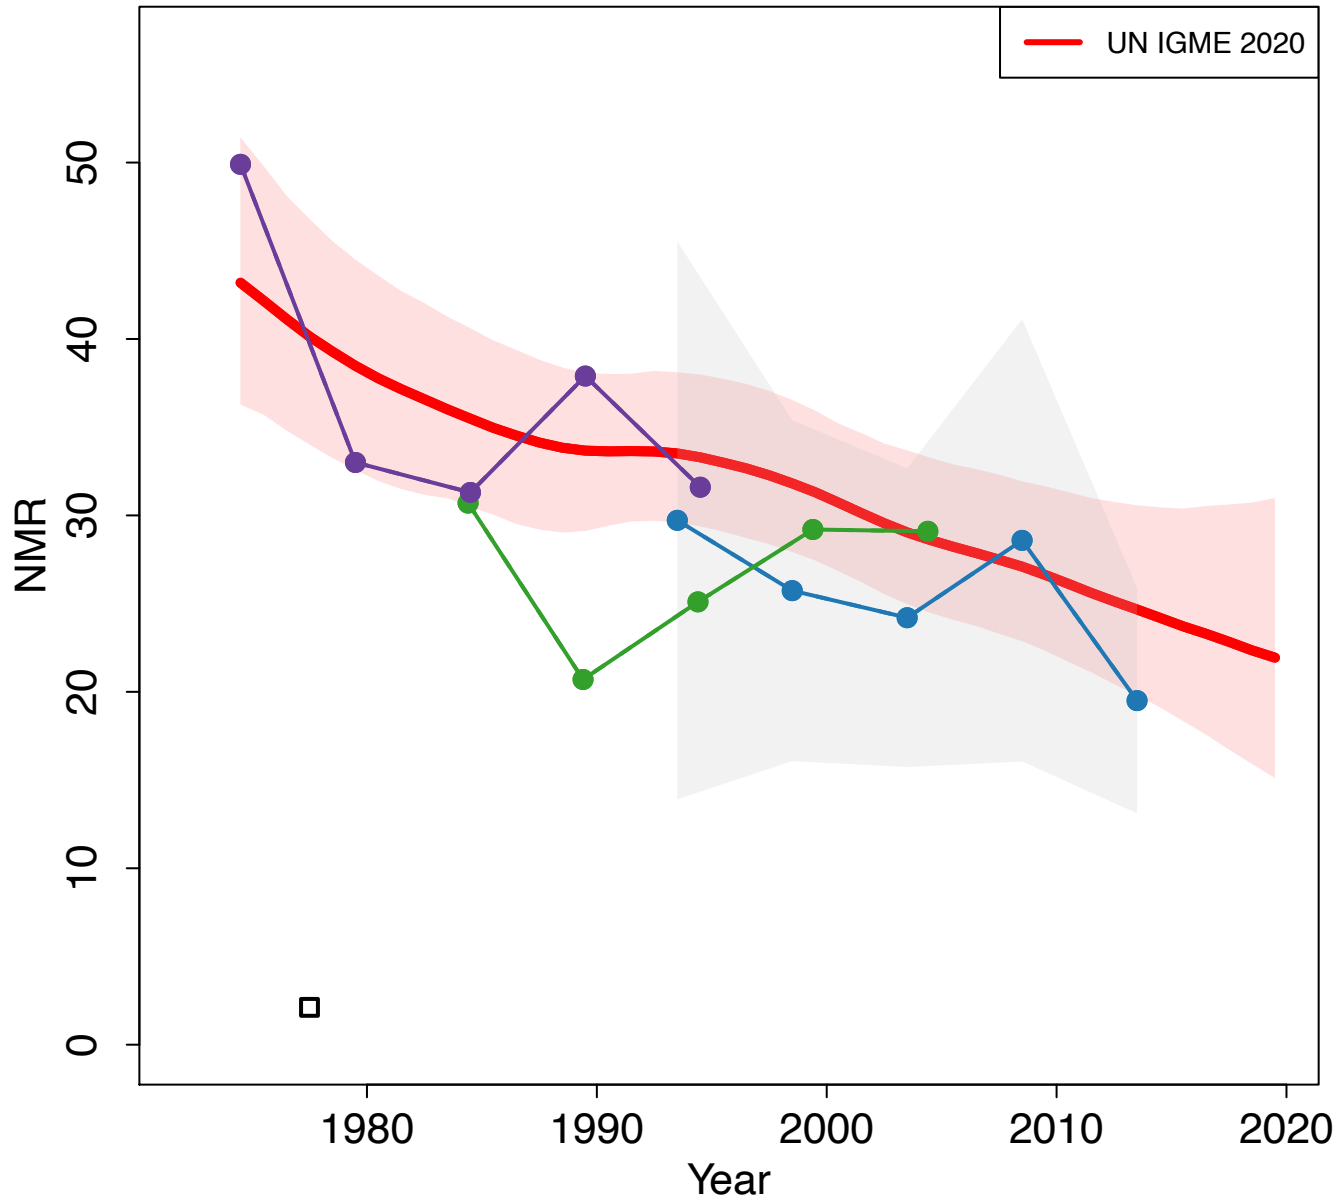

# Zoomed in

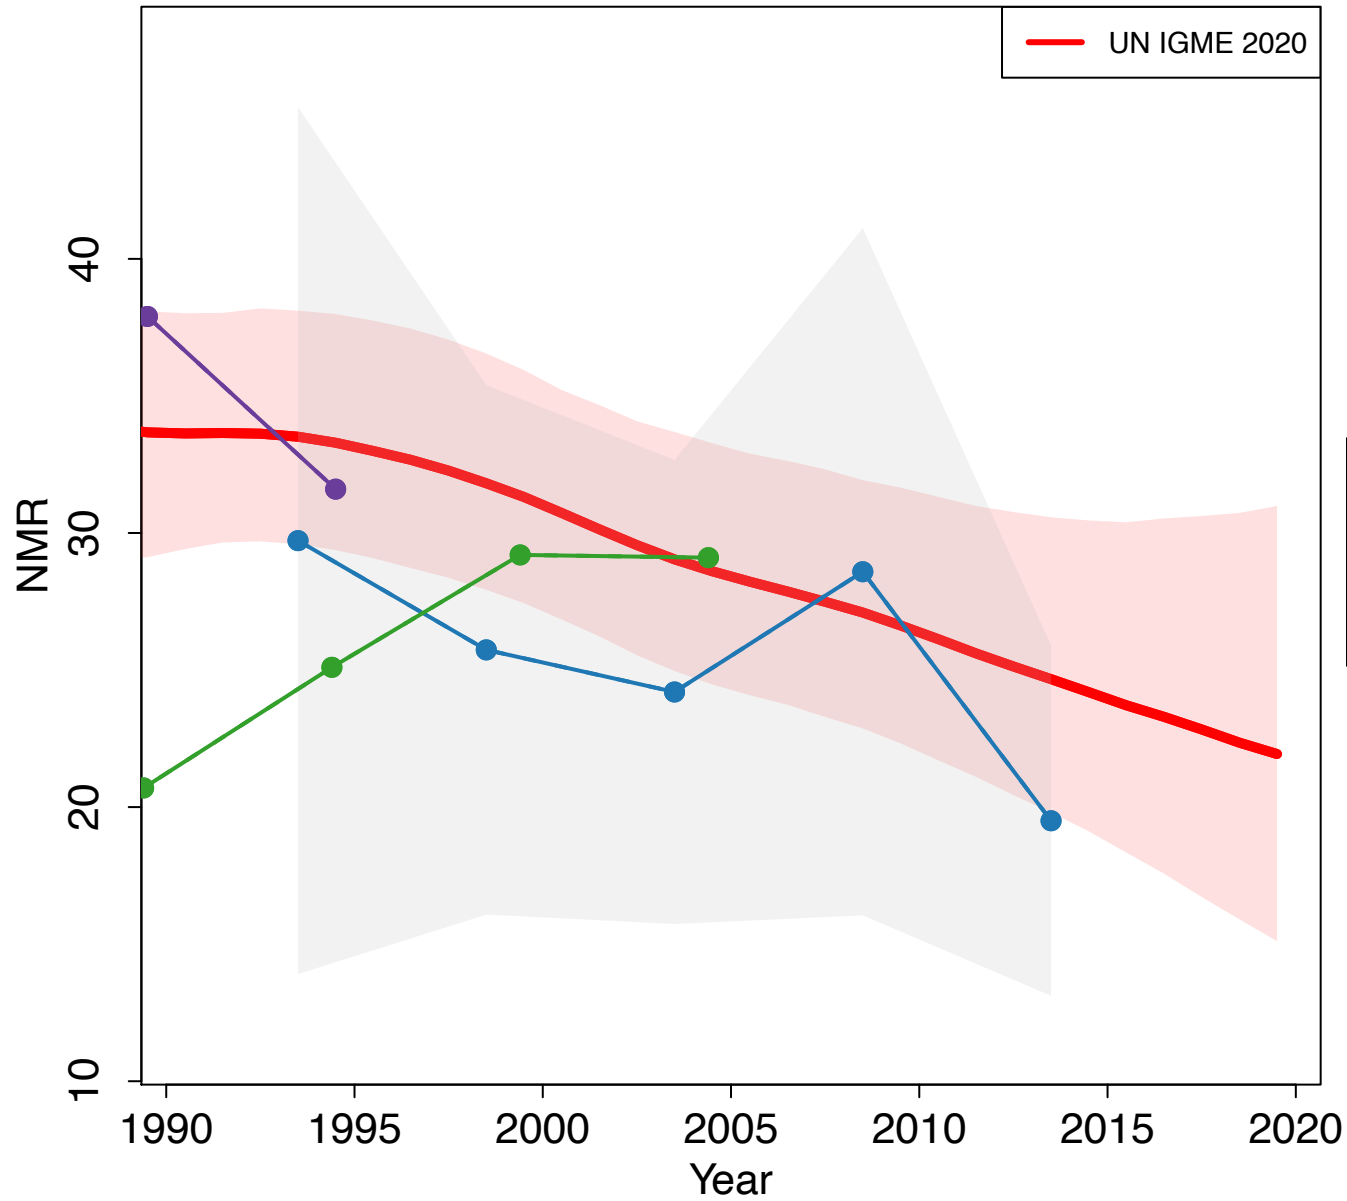

# Paraguay

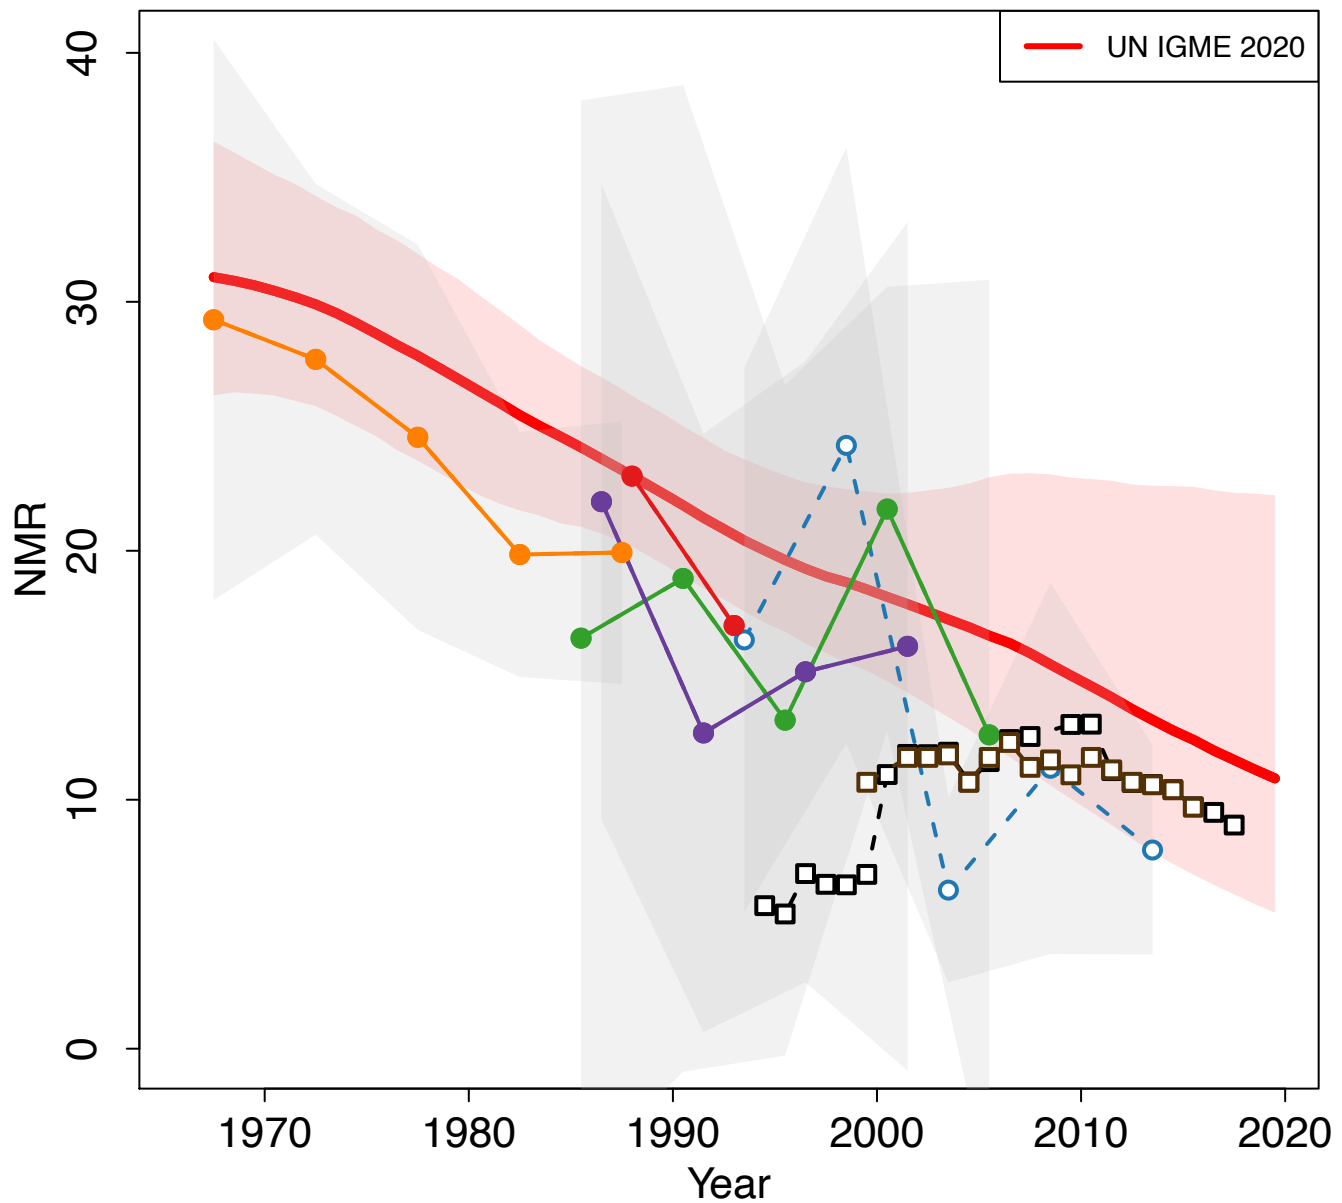

# Zoomed in

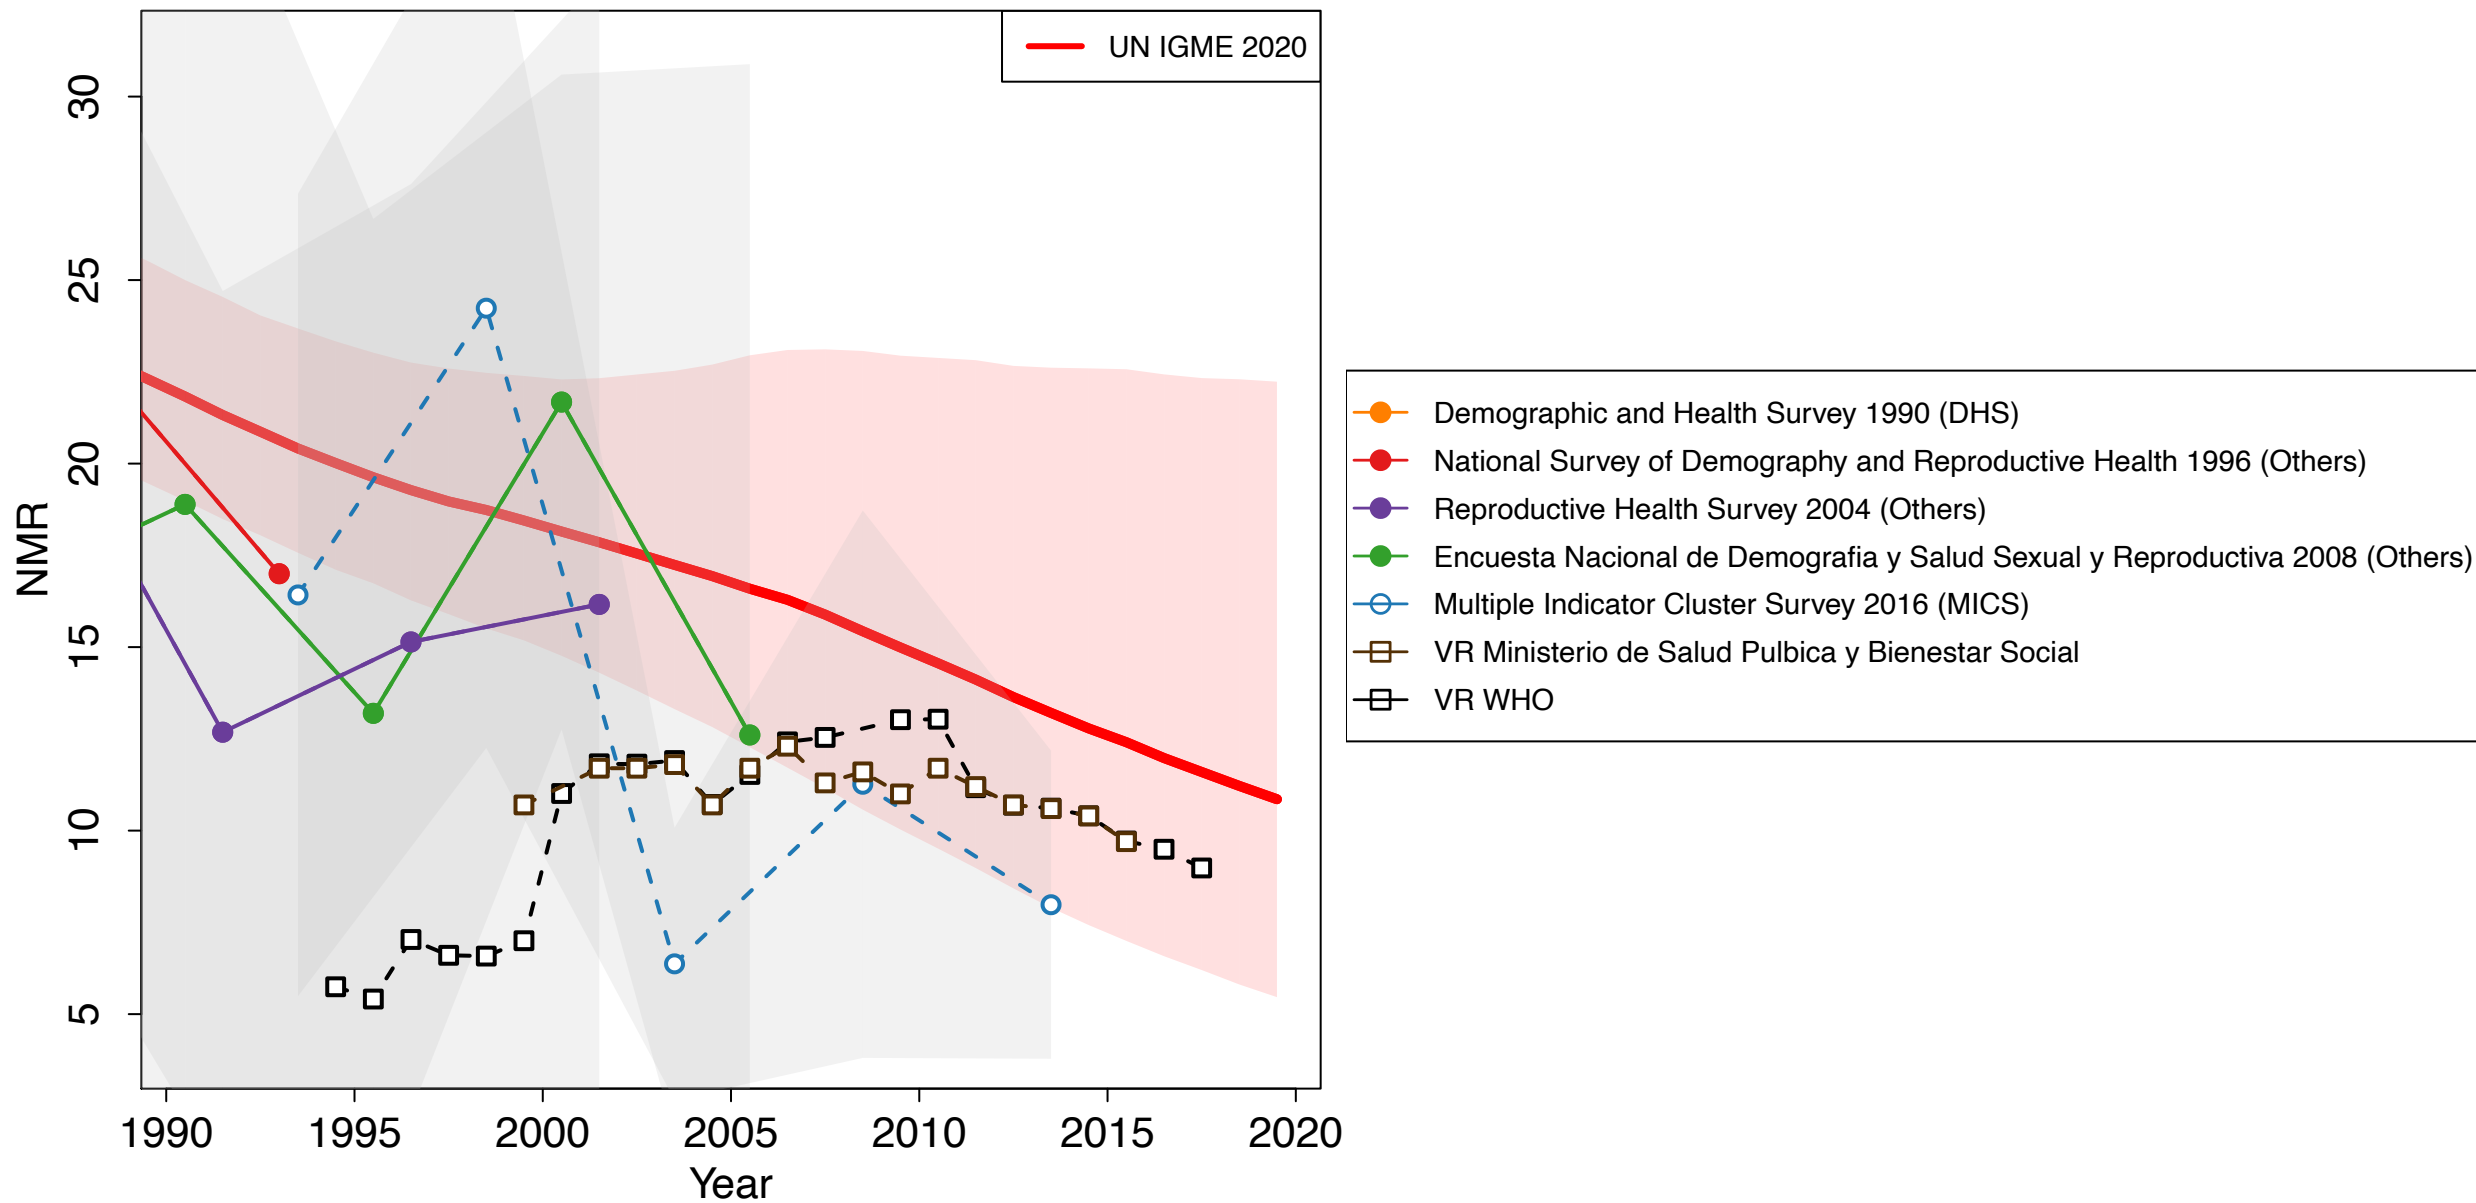

# Peru

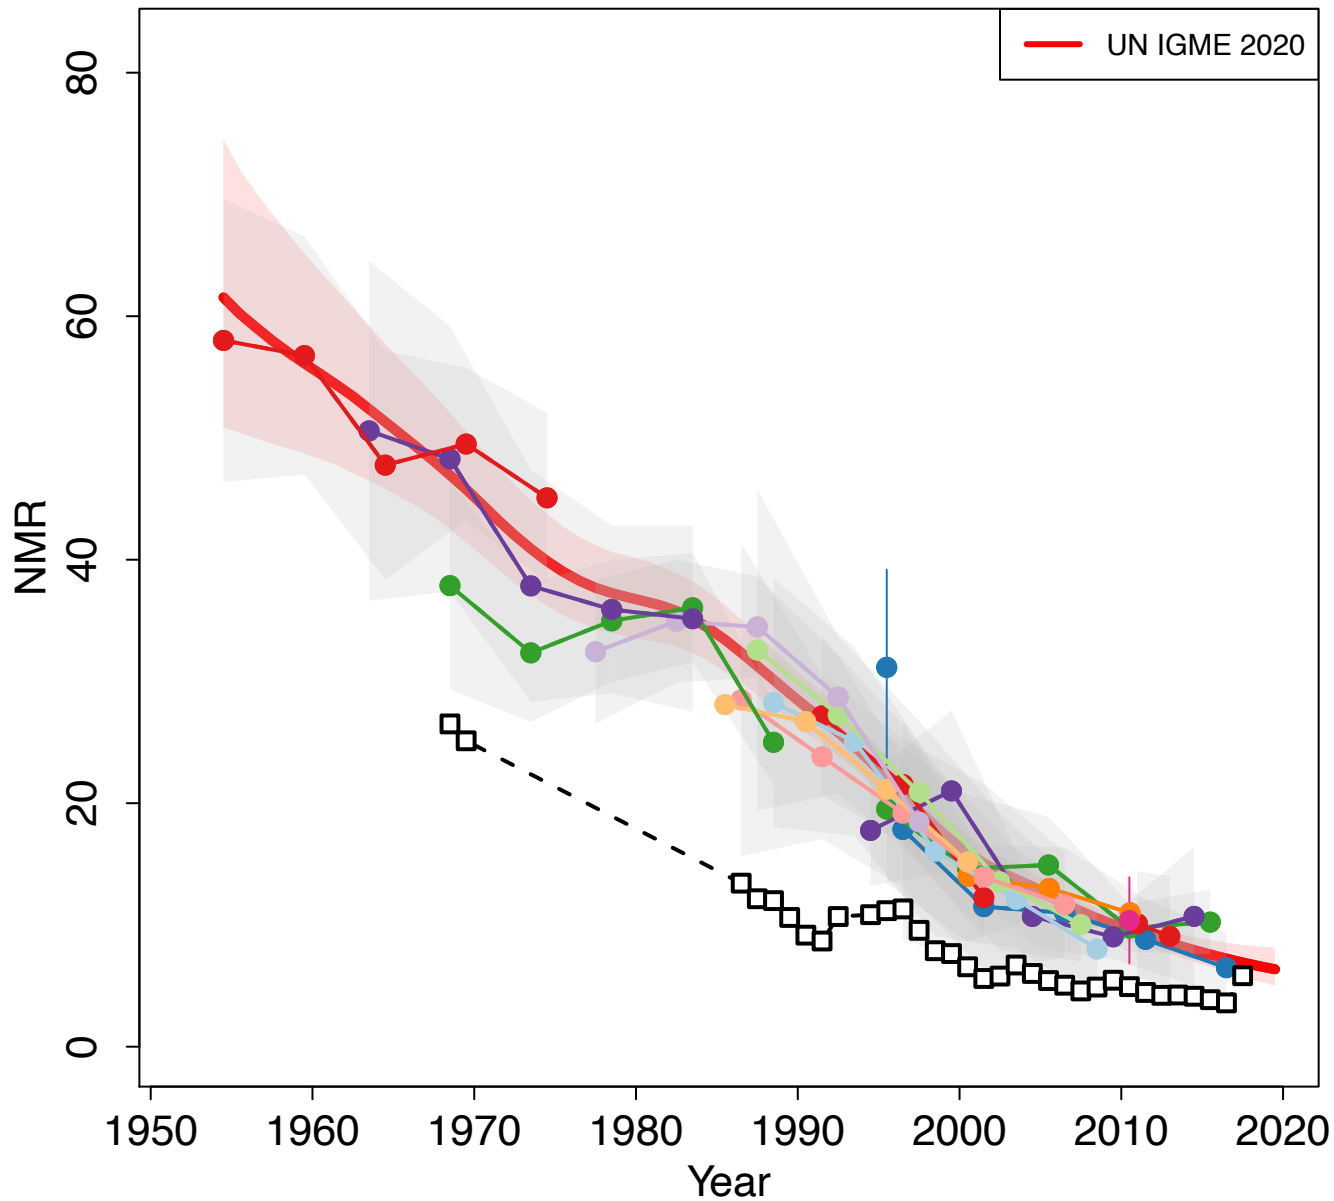

# Zoomed in

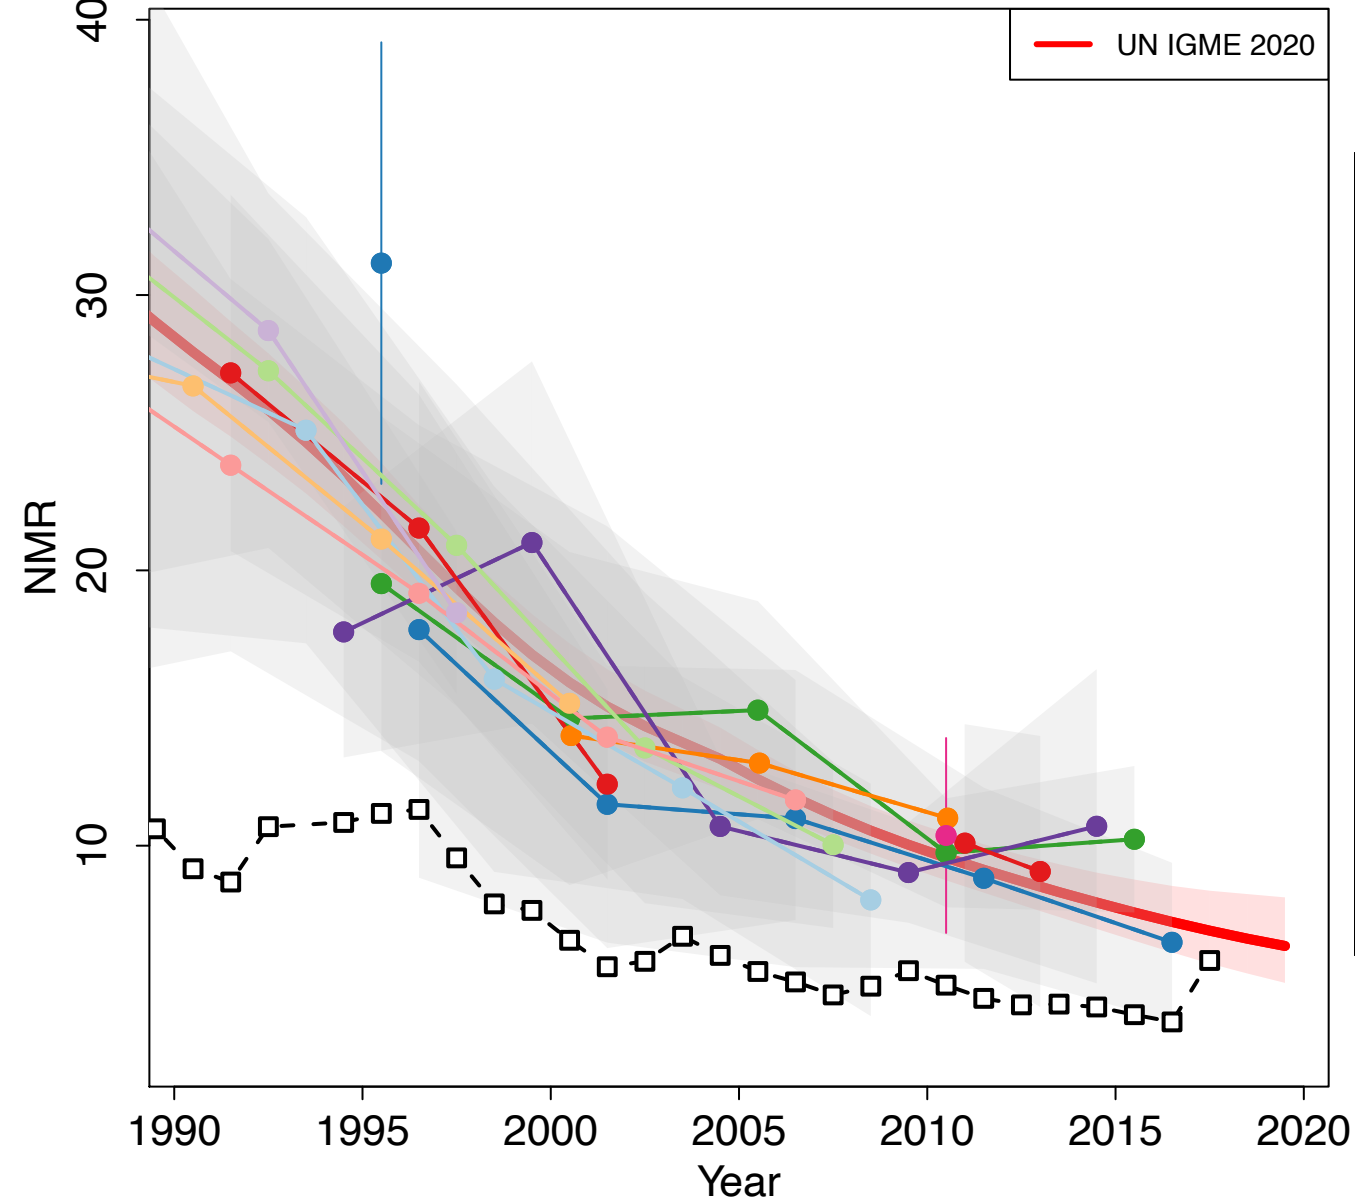

- World Fertility Survey 1977-1978 (Other DHS)
- Demographic and Health Survey 1986 (DHS)
- Demographic and Health Survey 1991-1992 (DHS)
- Demographic and Health Survey 1996 (DHS)
- Demographic and Health Survey 2000 (DHS)
- Demographic and Health Survey 2008 (DHS)
- Demographic and Health Survey 2009 (DHS)
- Demographic and Health Survey 2010 (DHS)
- Demographic and Health Survey 2011 (DHS)
- Demographic and Health Survey 2012 (DHS)
- Demographic and Health Survey 2013 (DHS)
- National Demographic and Health Survey 2014 (Other DHS)
- National Demographic and Health Survey 2017 (Other DHS)
- National Demographic and Health Survey 2018 (Other DHS)
- Encuesta Demografica y de Salud Familiar 2019 (Other DHS)
- VR WHO

# Philippines

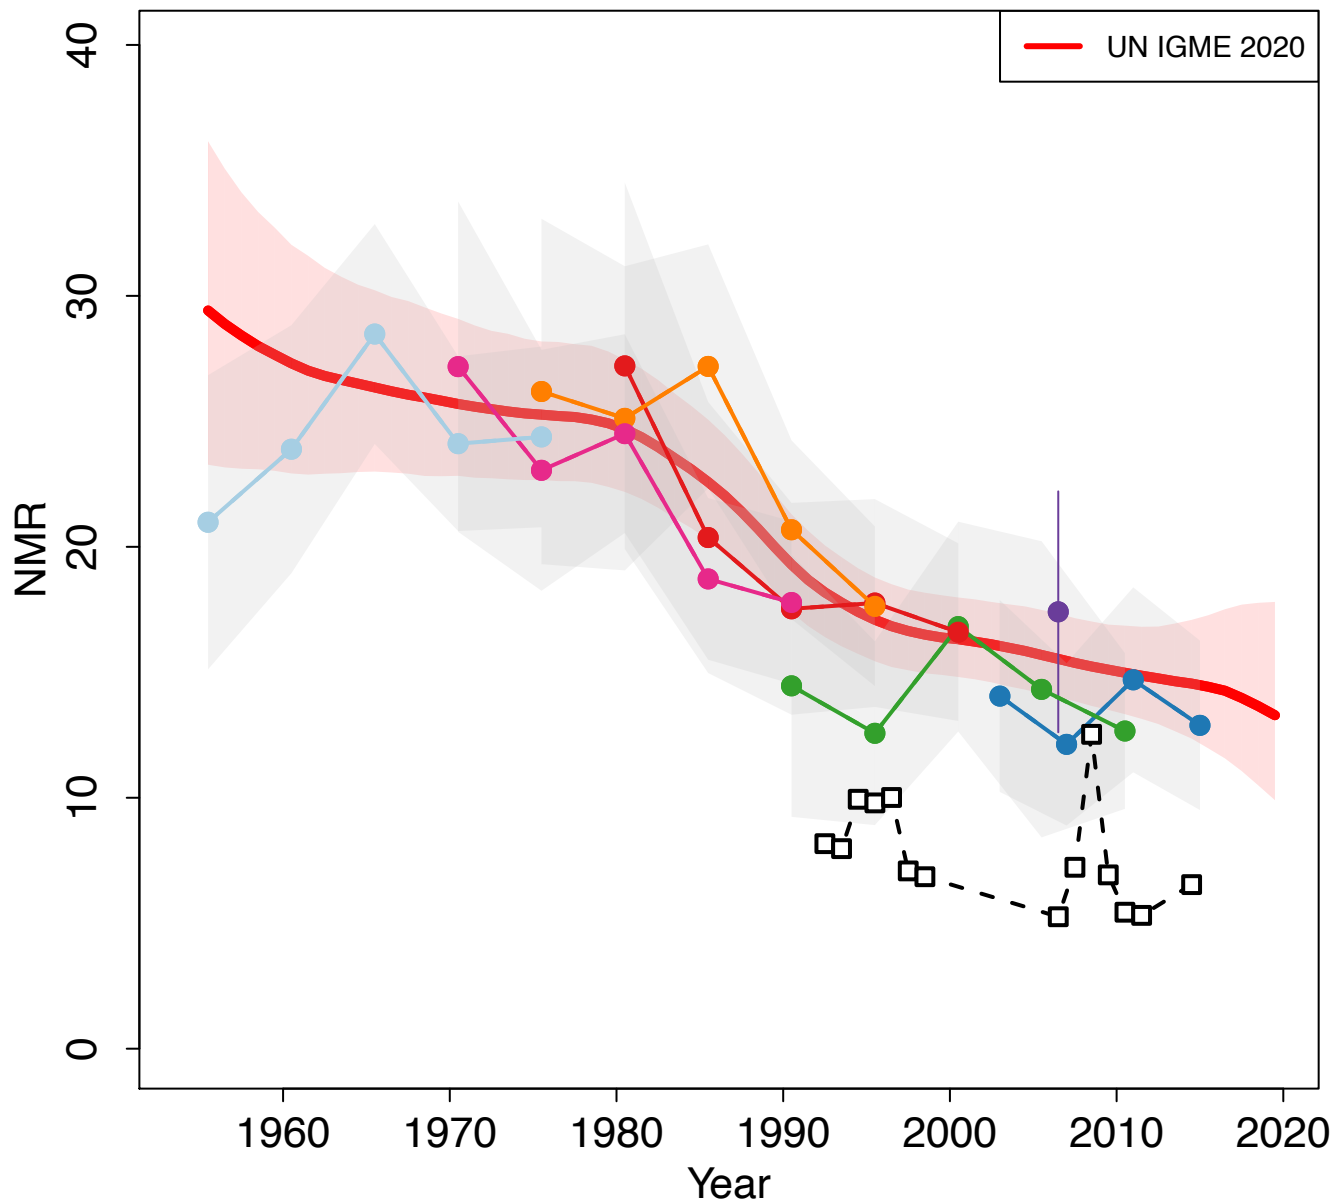

# Zoomed in

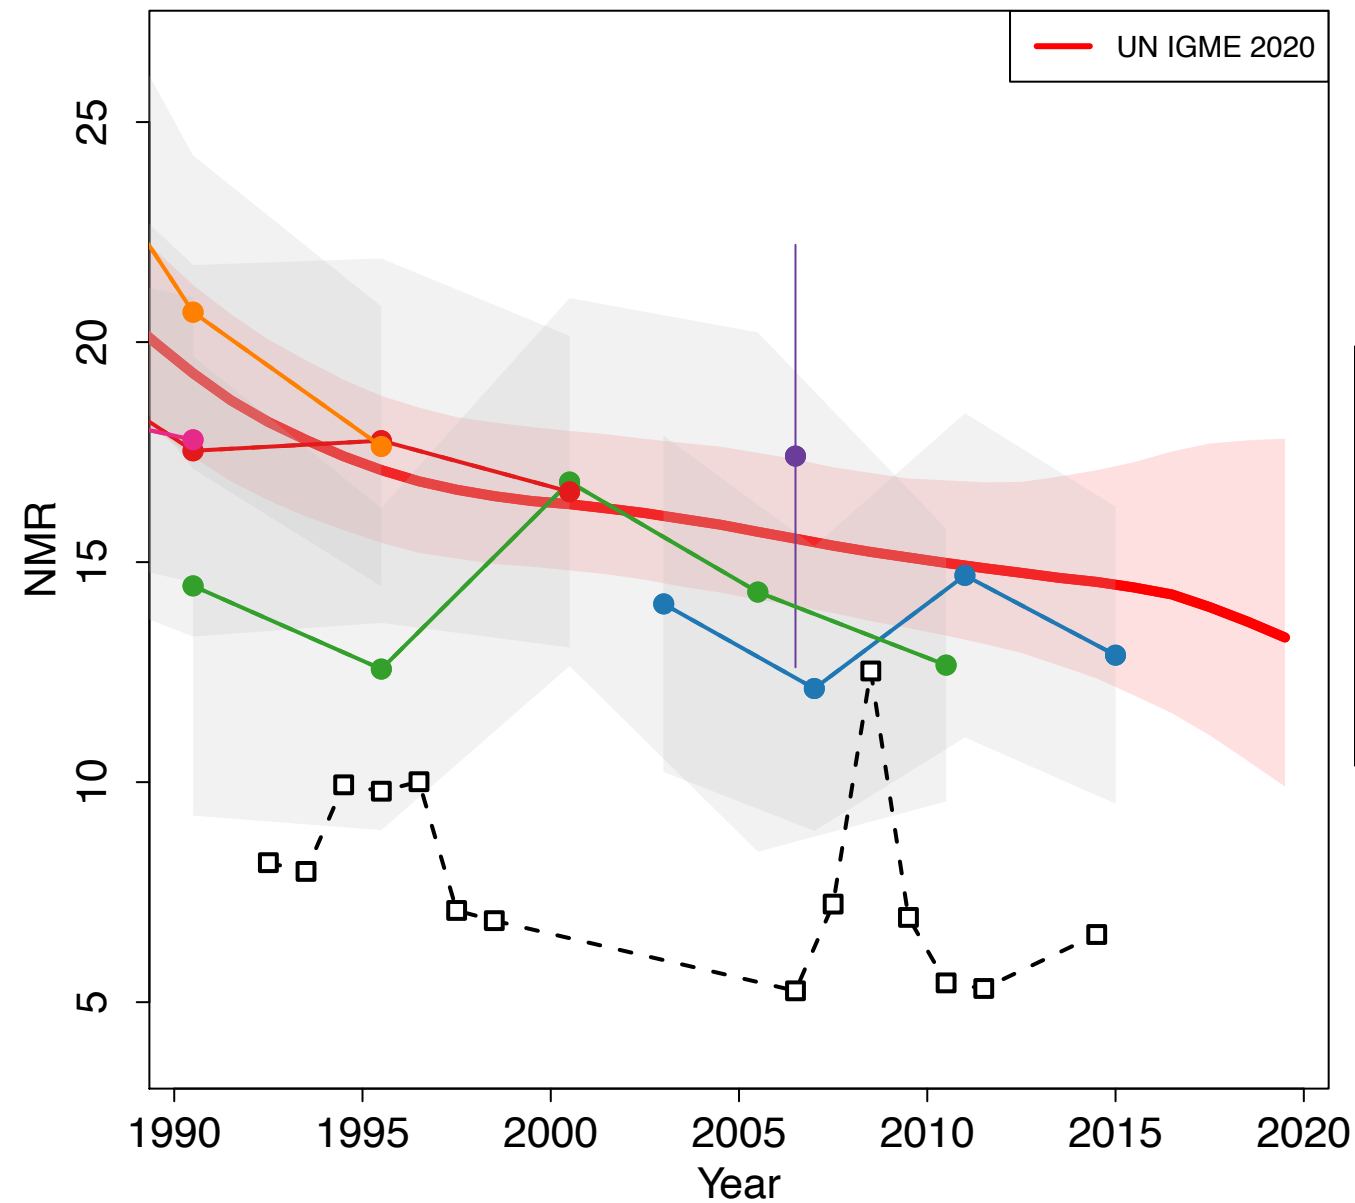

- World Fertility Survey 1978 (Other DHS)
- Demographic and Health Survey 1993 (DHS)
- Demographic and Health Survey 1998 (DHS)
- Demographic and Health Survey 2003 (DHS)
- Demographic and Health Survey 2008 (DHS)
- National Demographic and Health Survey 2013 (DHS)
- Demographic and Health Survey 2017 (DHS)
- VR WHO

# Poland

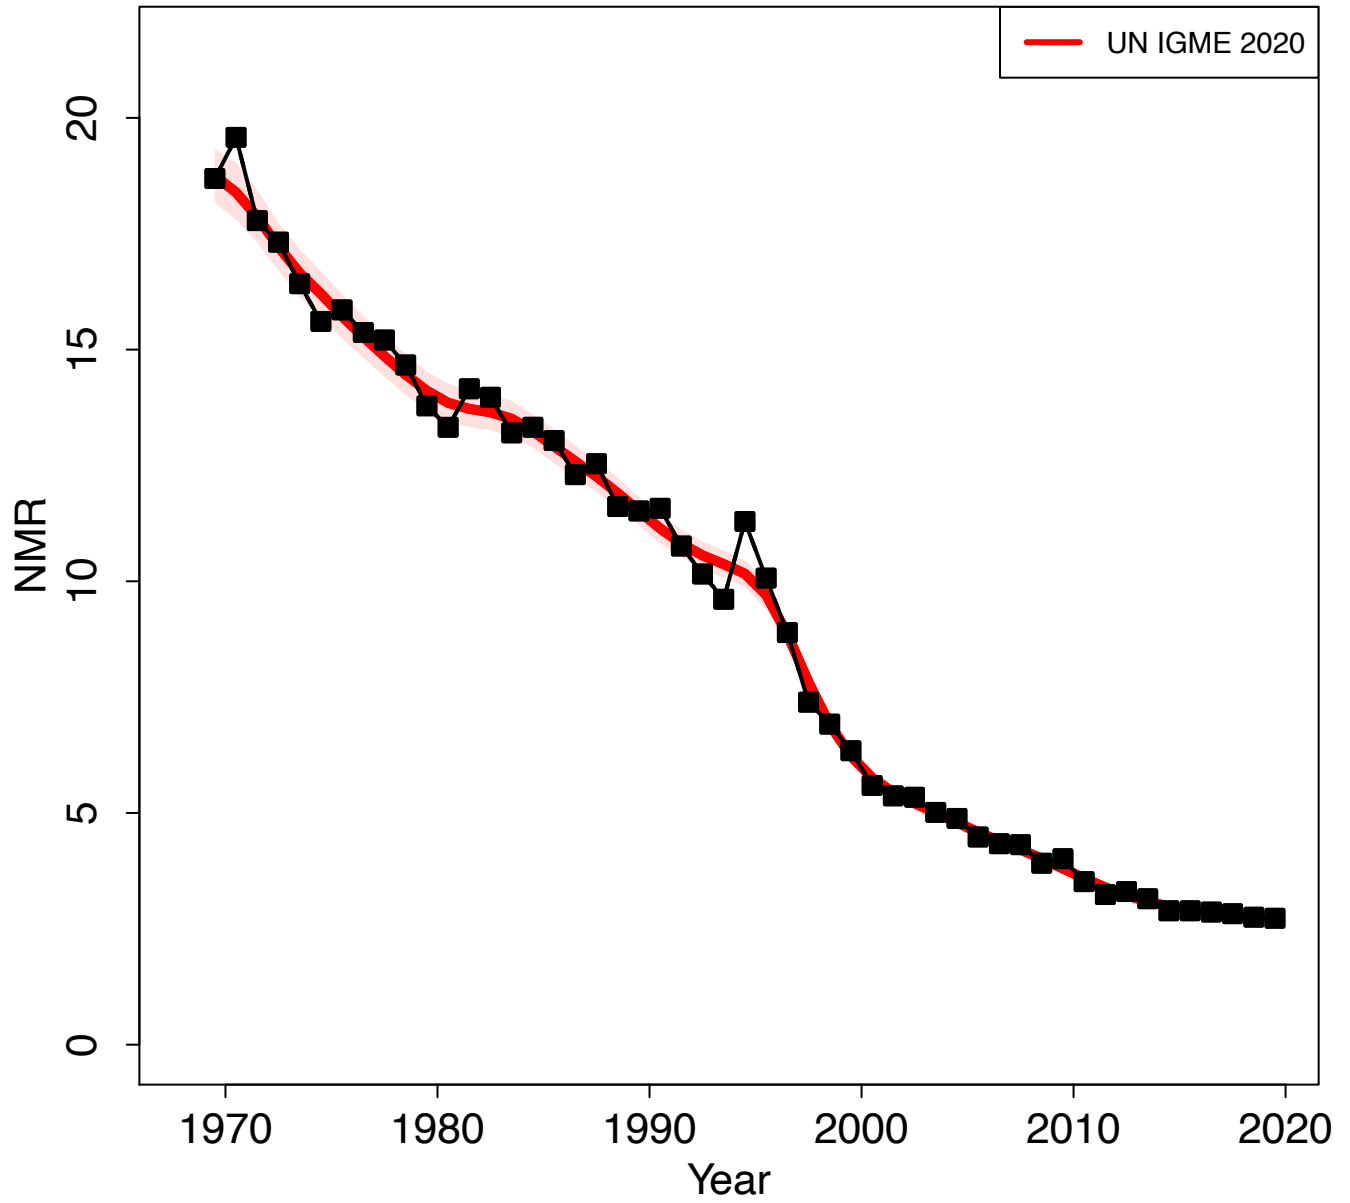

# Zoomed in

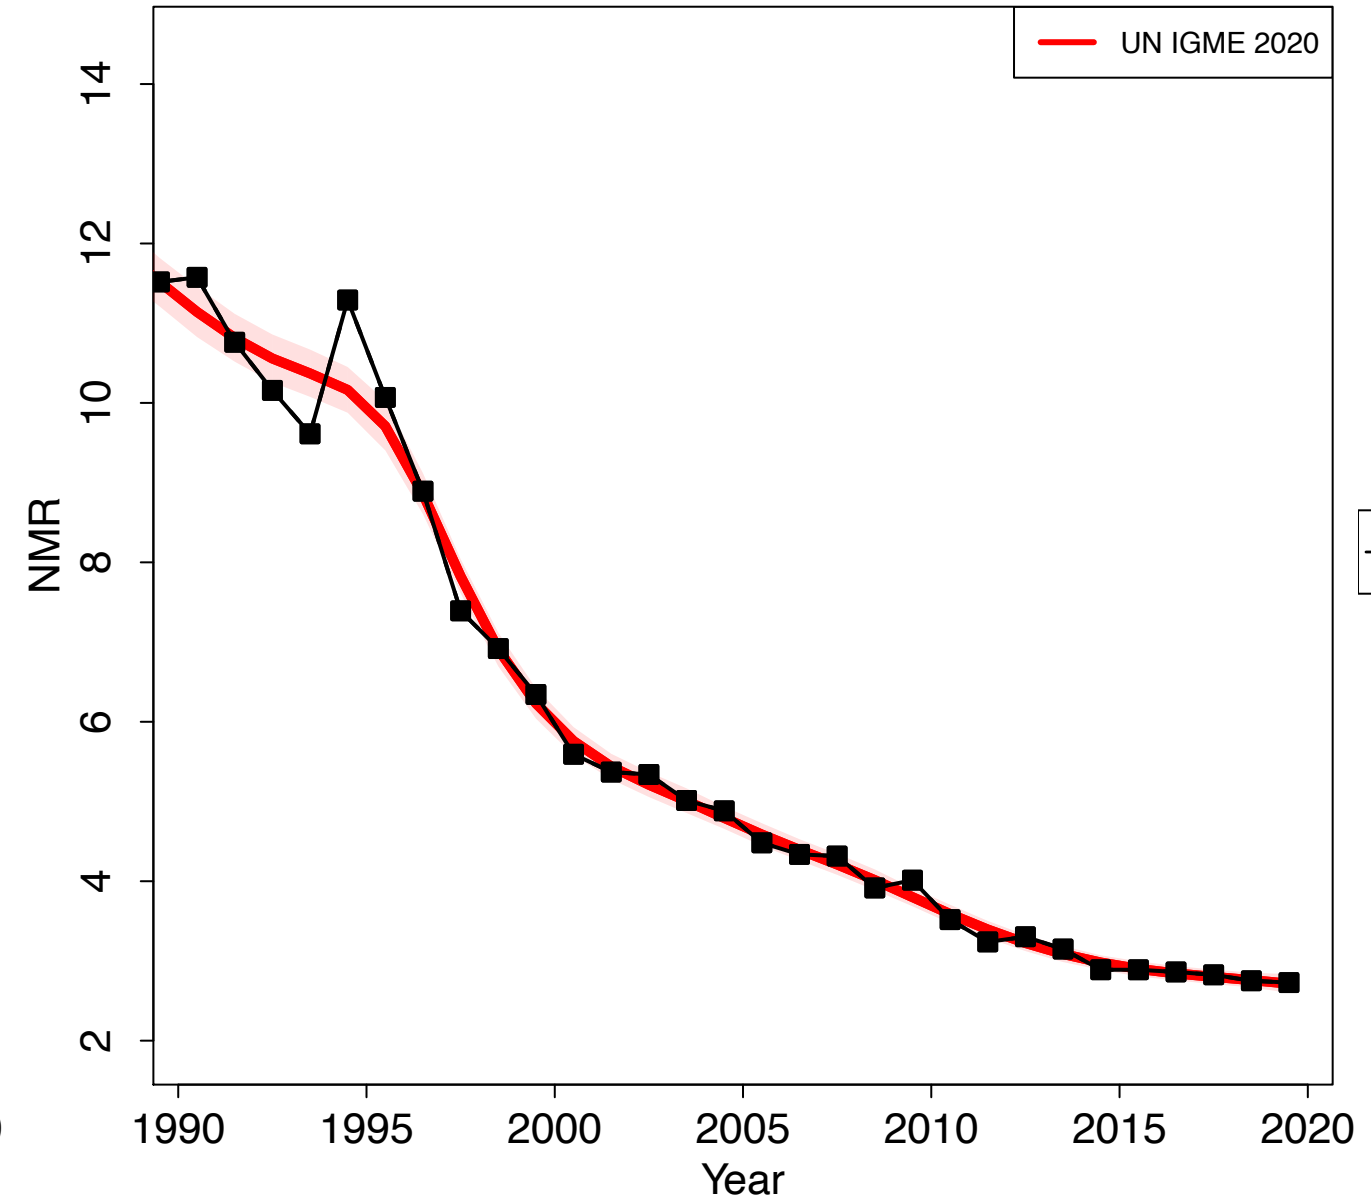



# Portugal

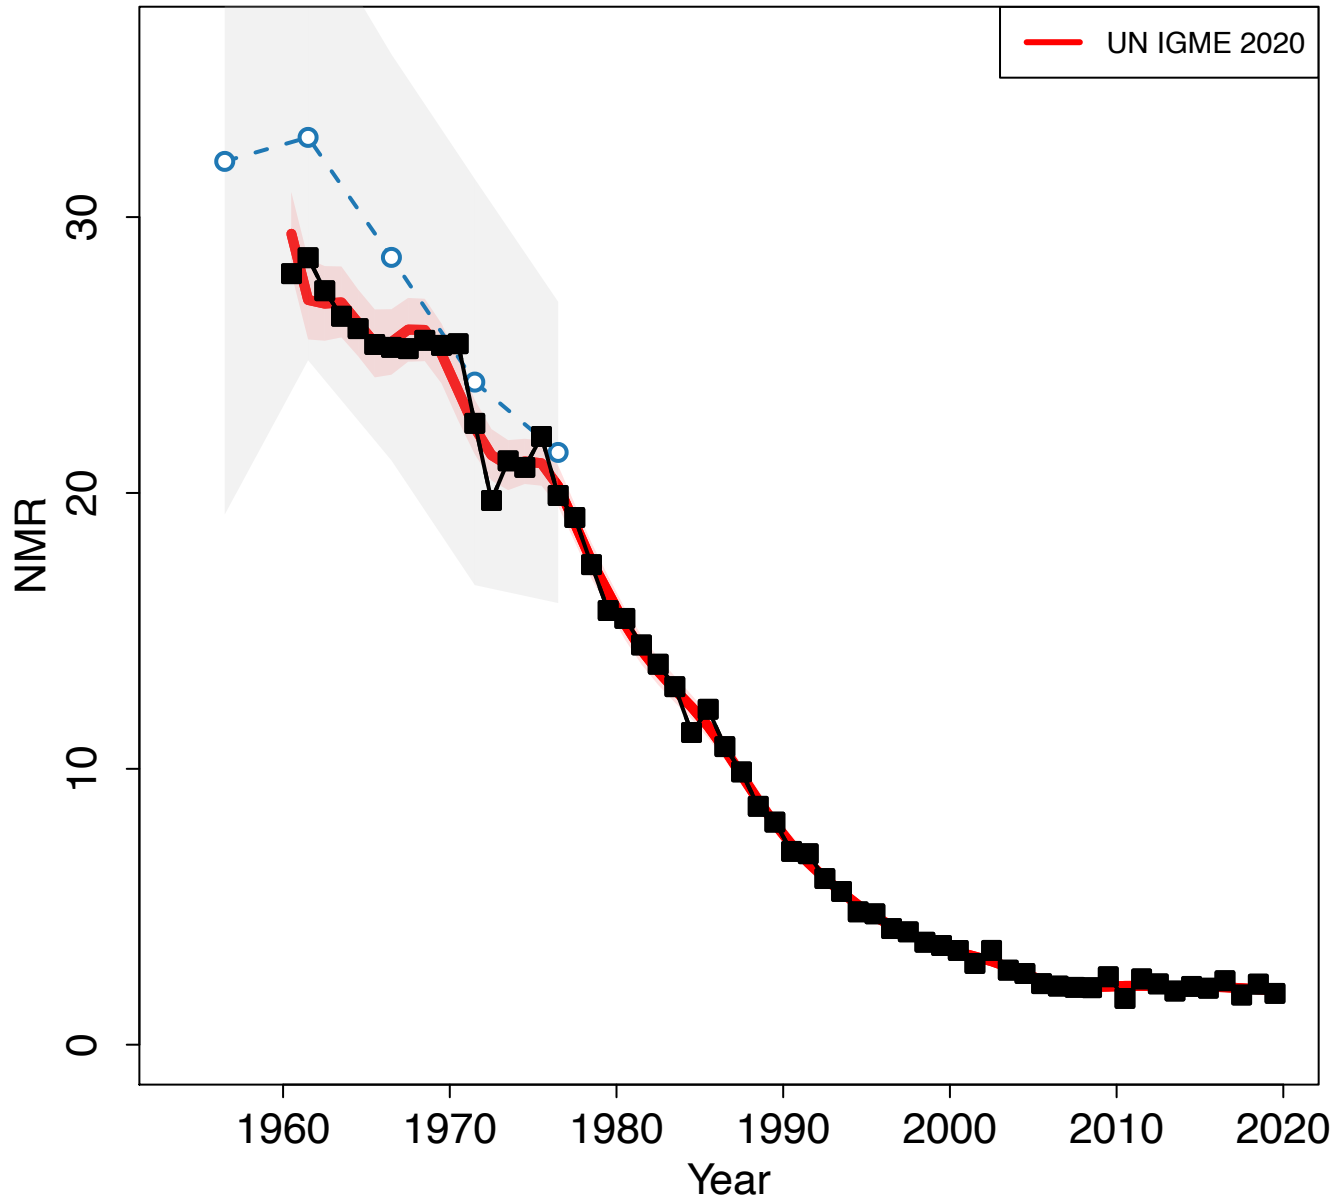

# Zoomed in

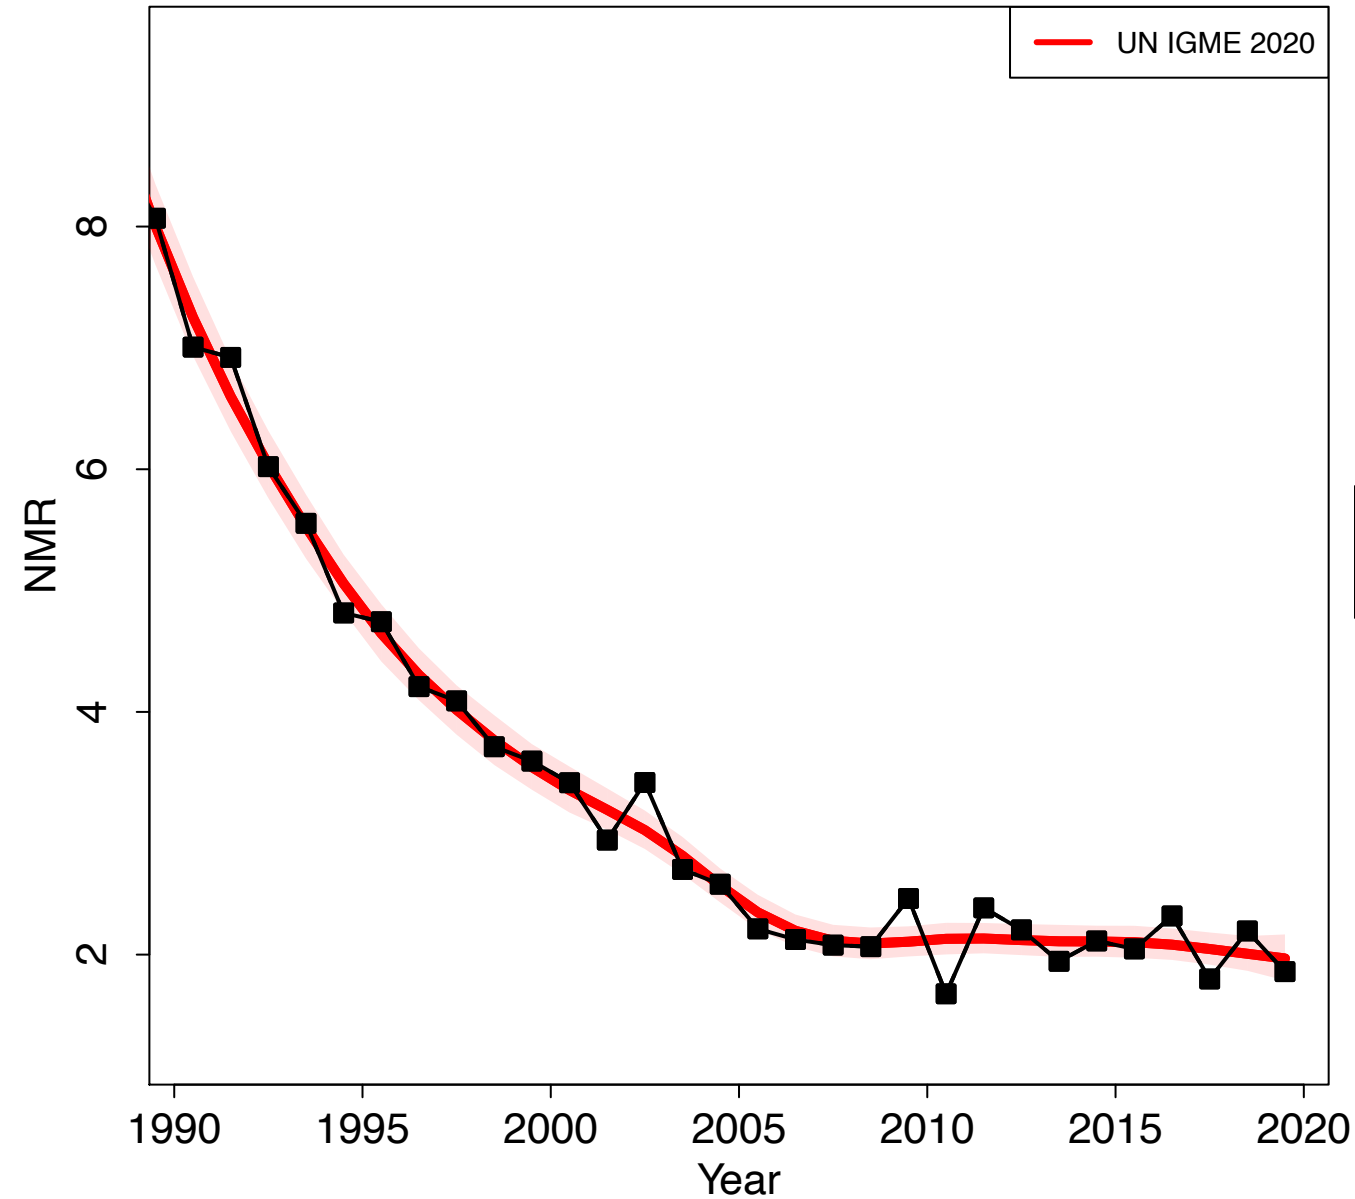

# Qatar

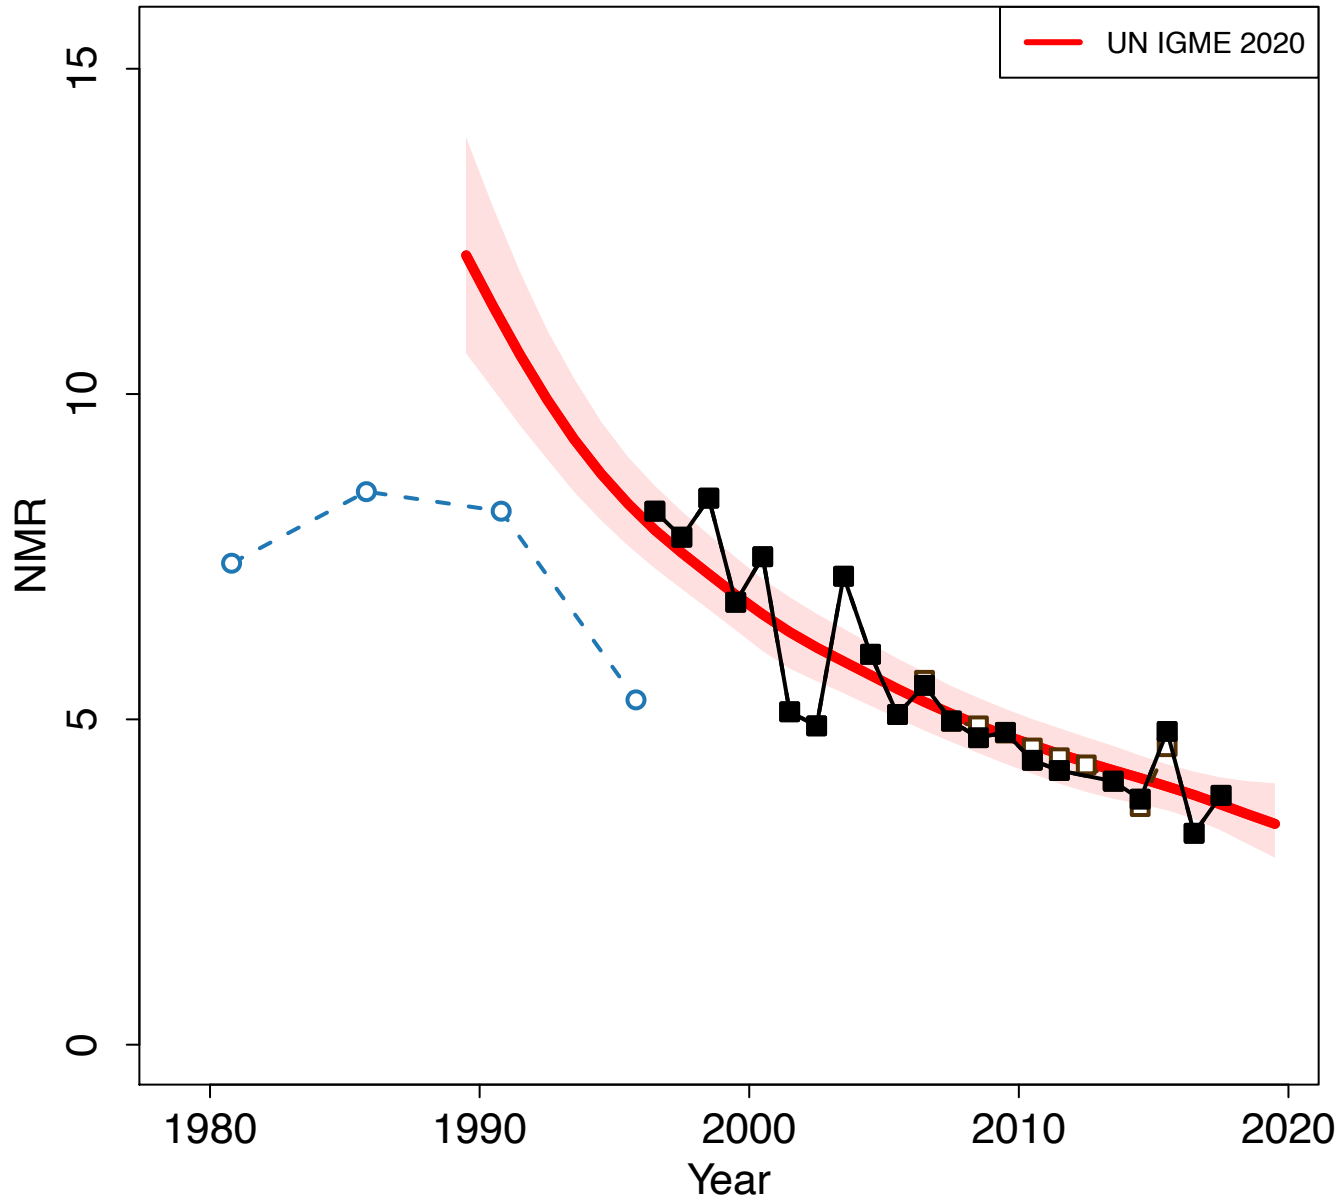

# Zoomed in

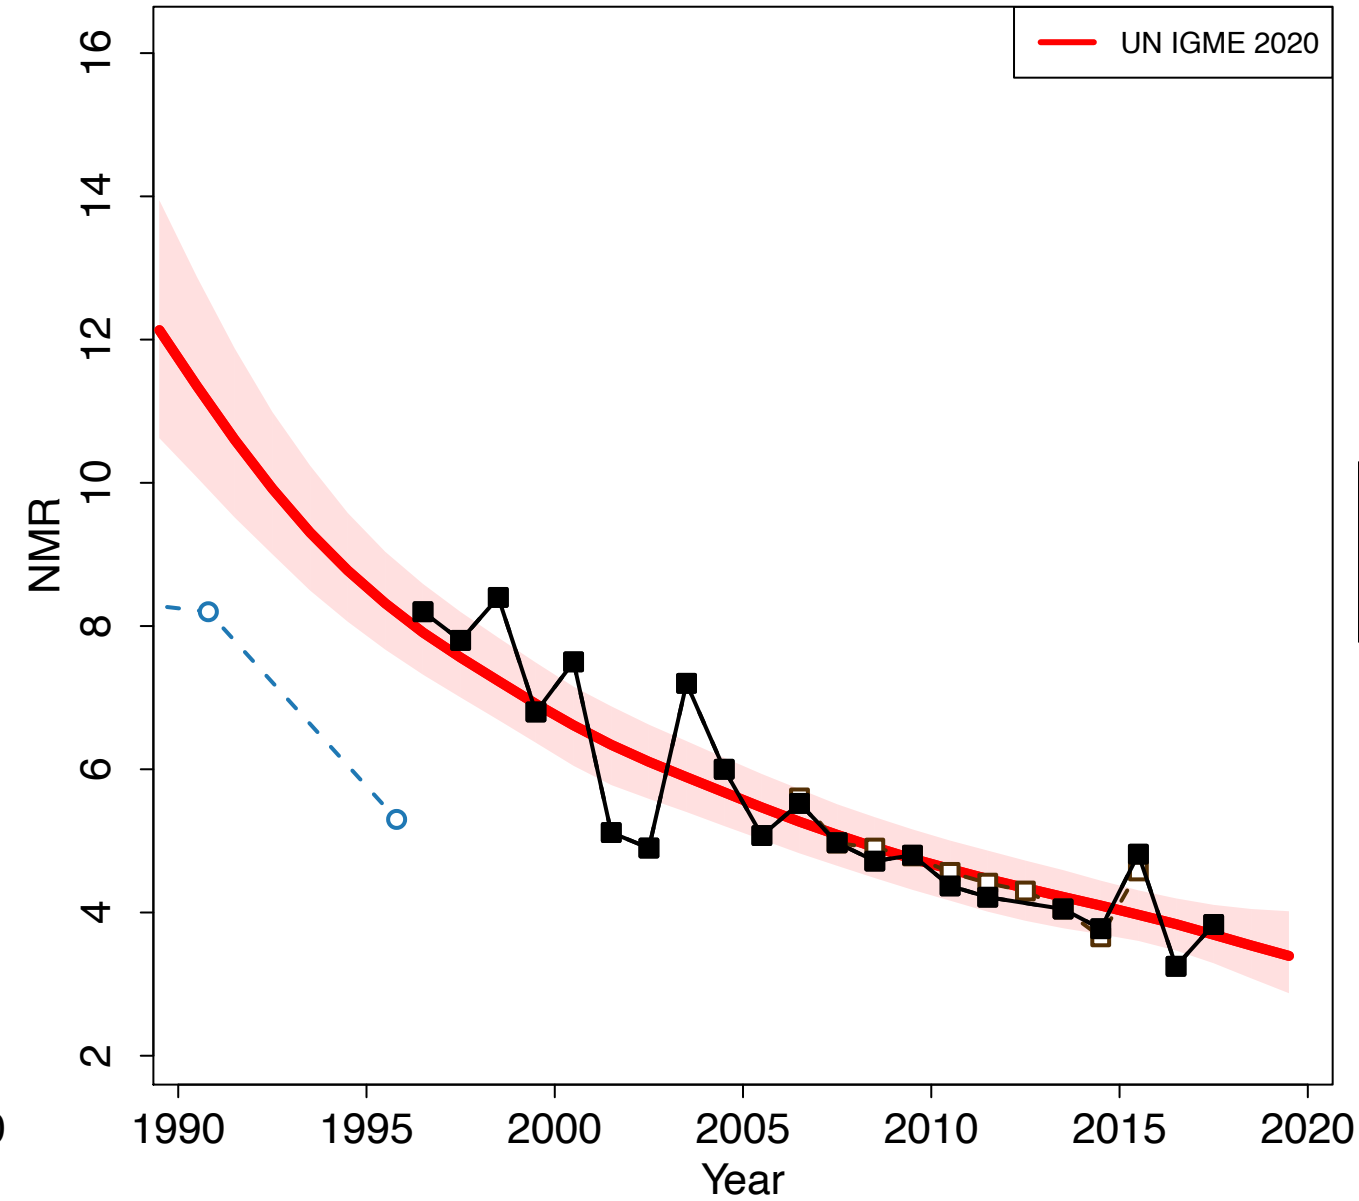

# Romania

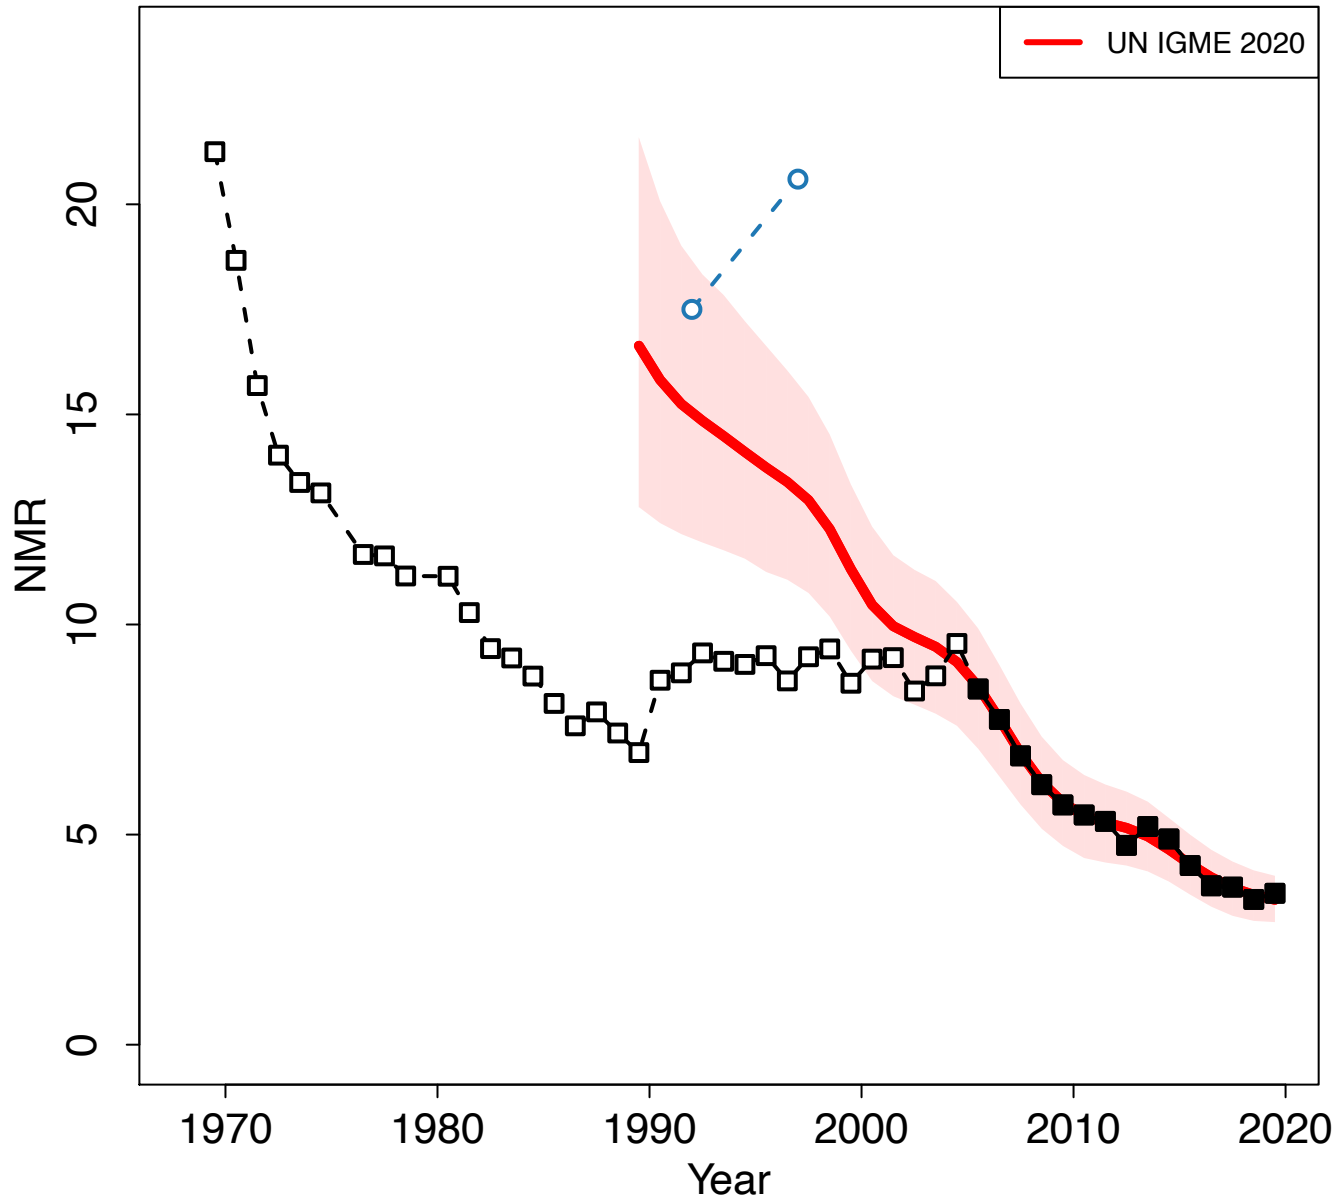

# Zoomed in

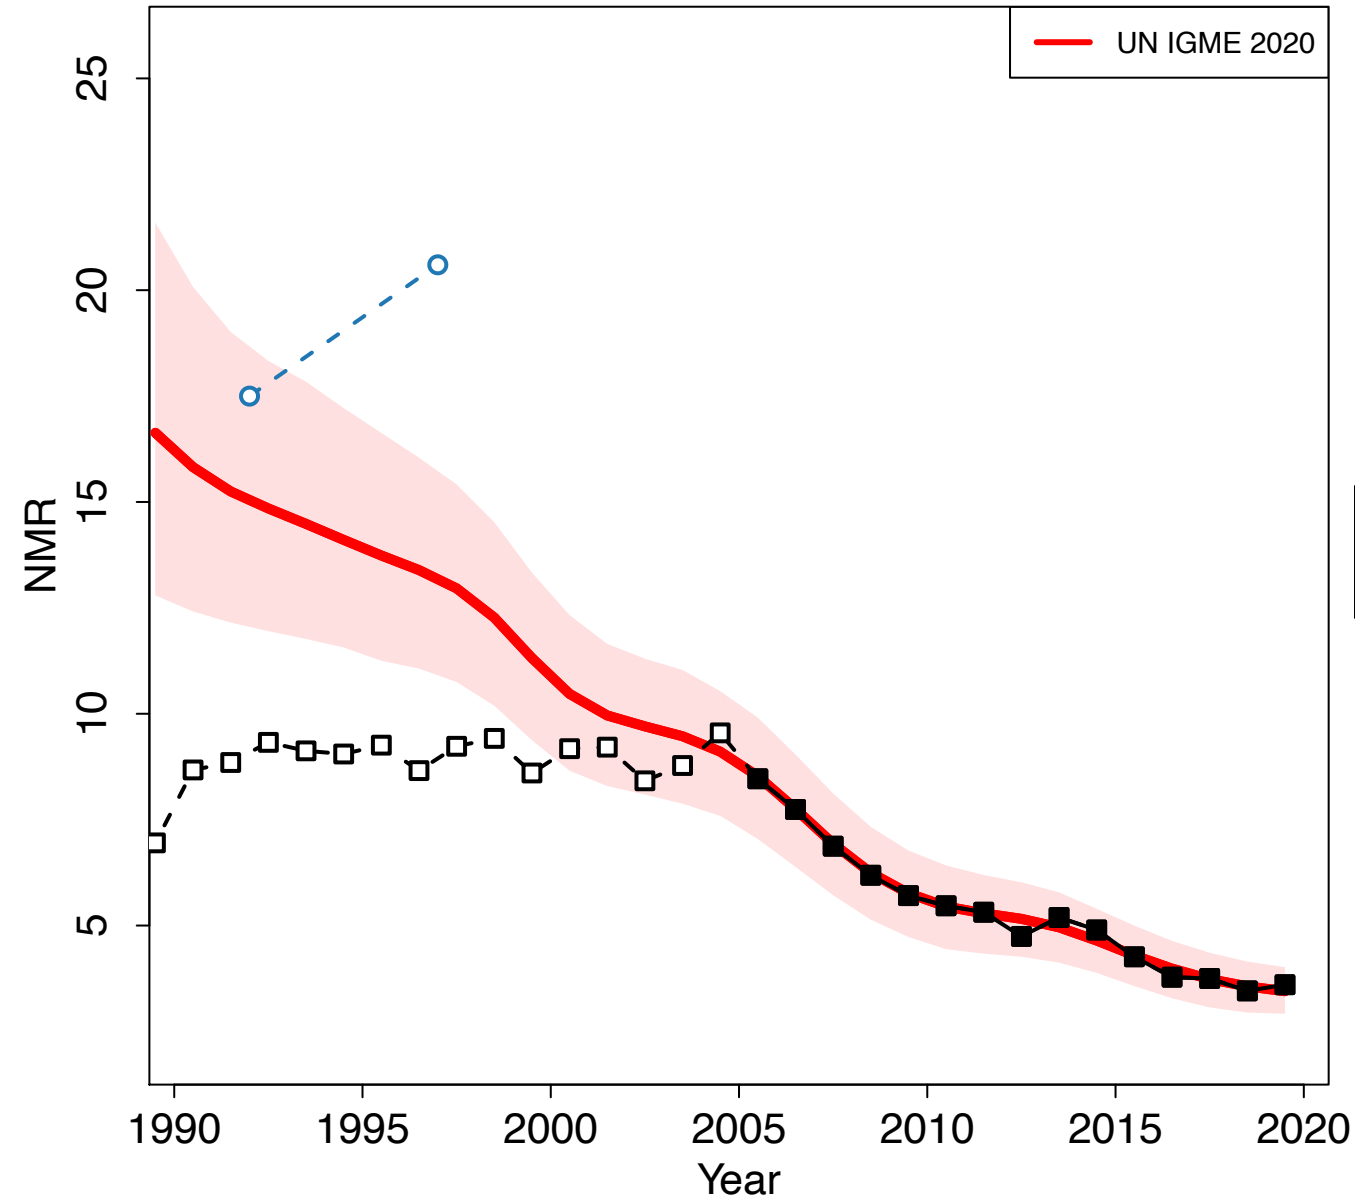

# Russian Federation

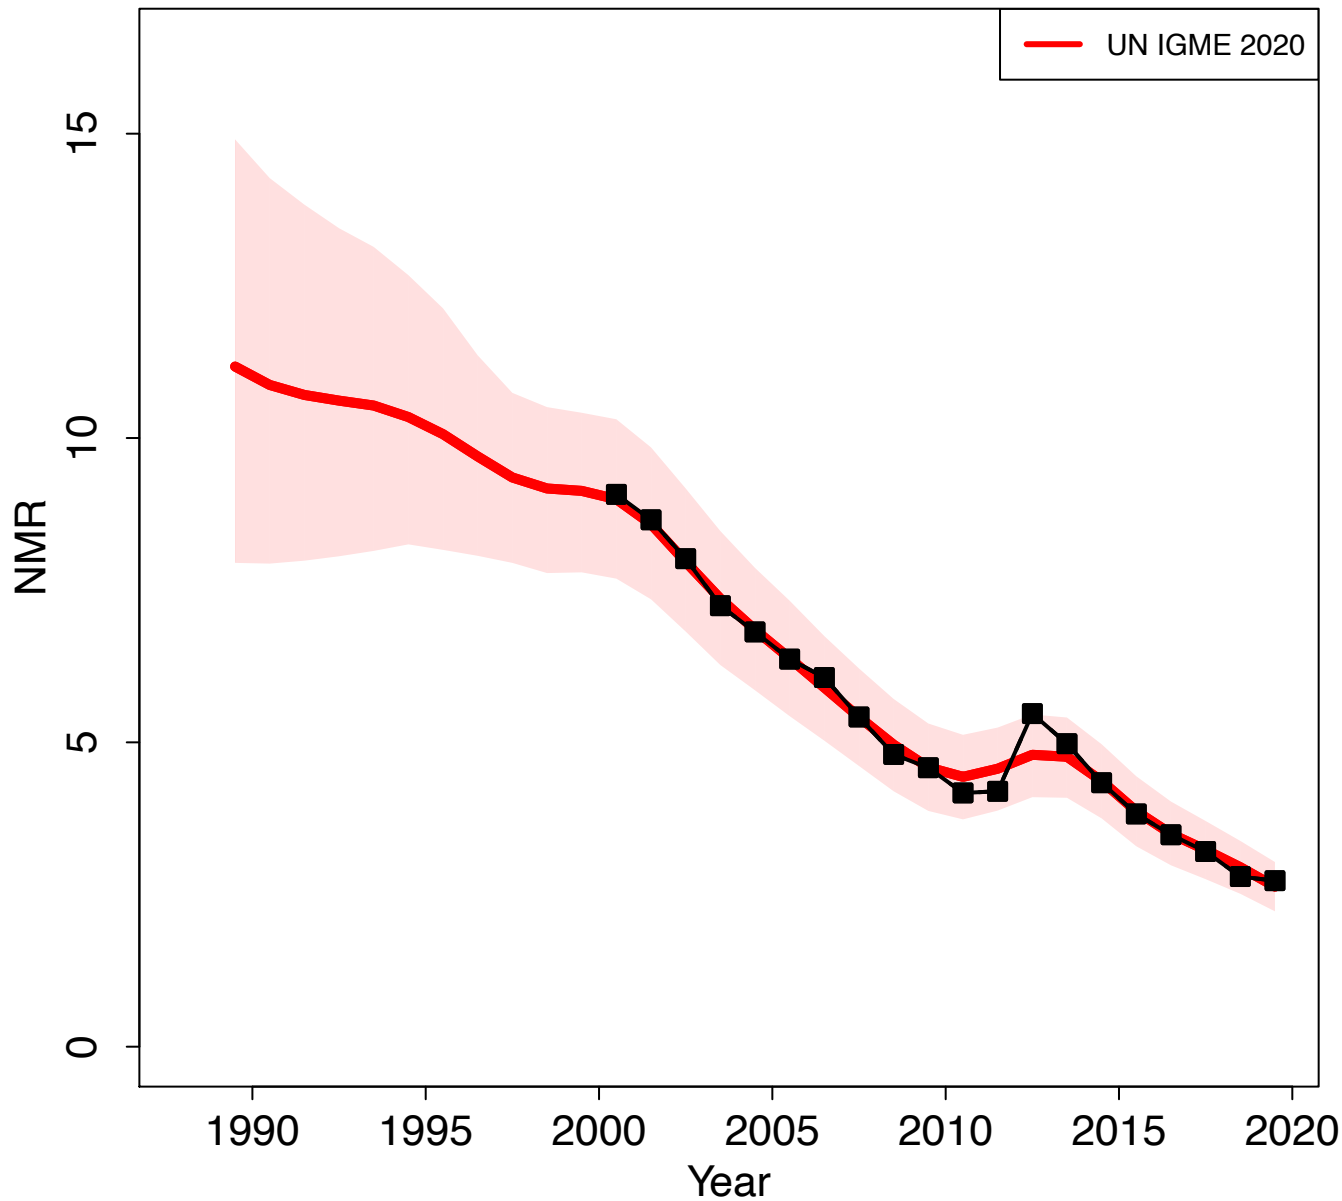

# Zoomed in

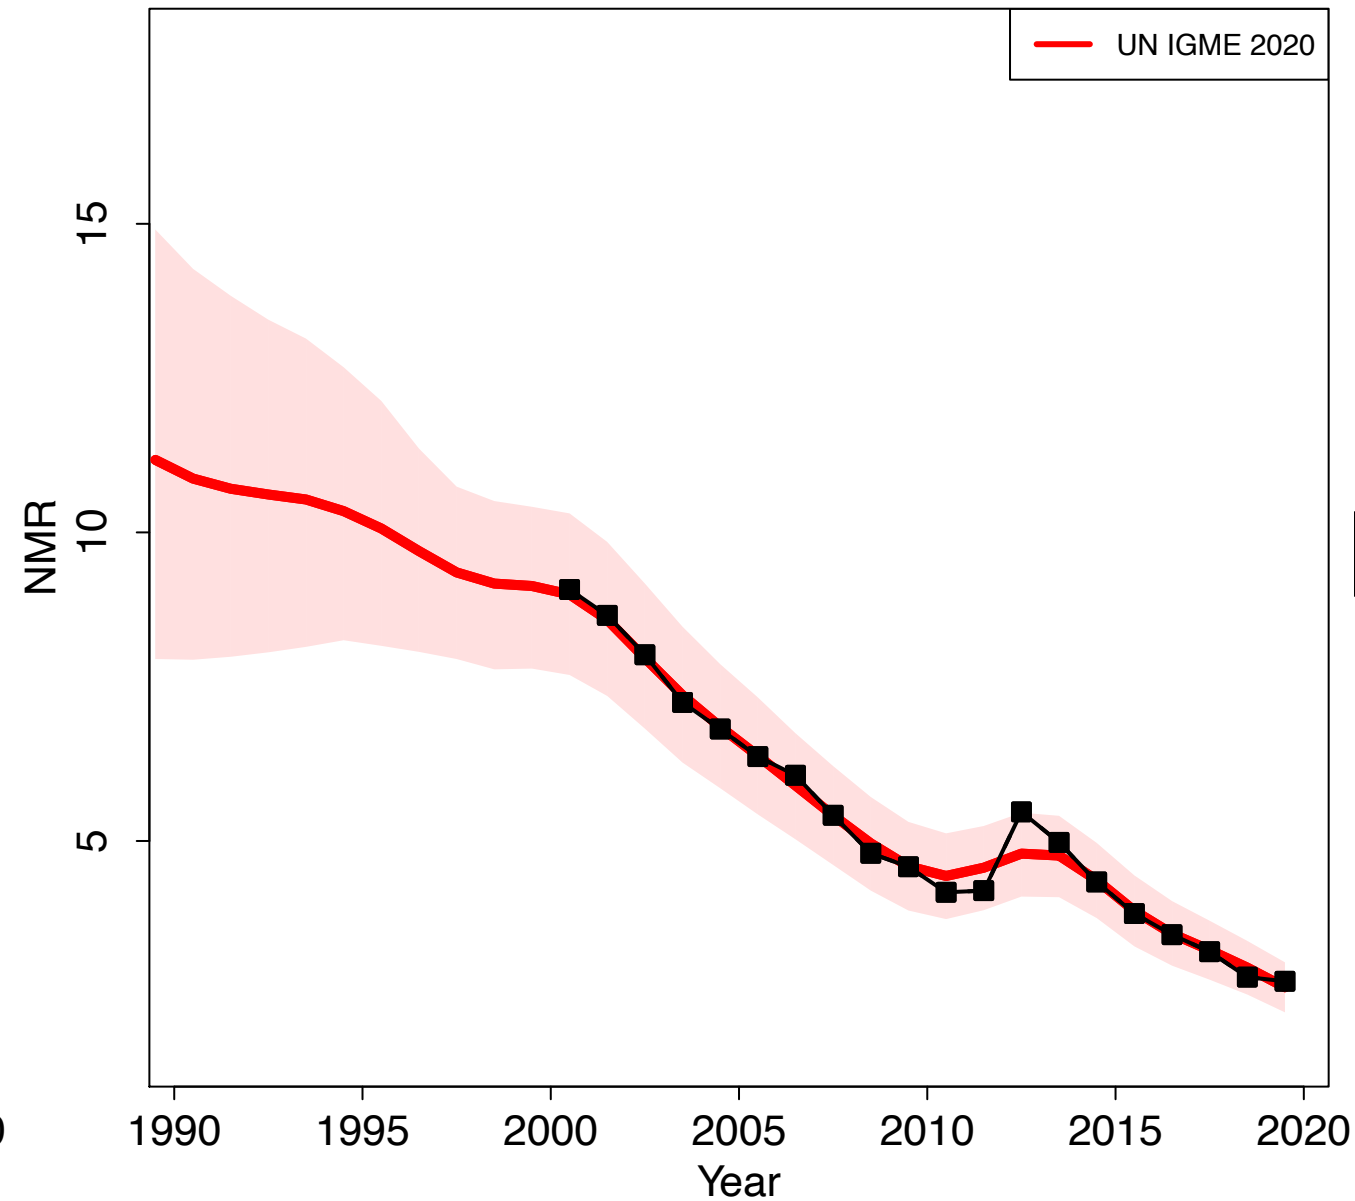

# Rwanda

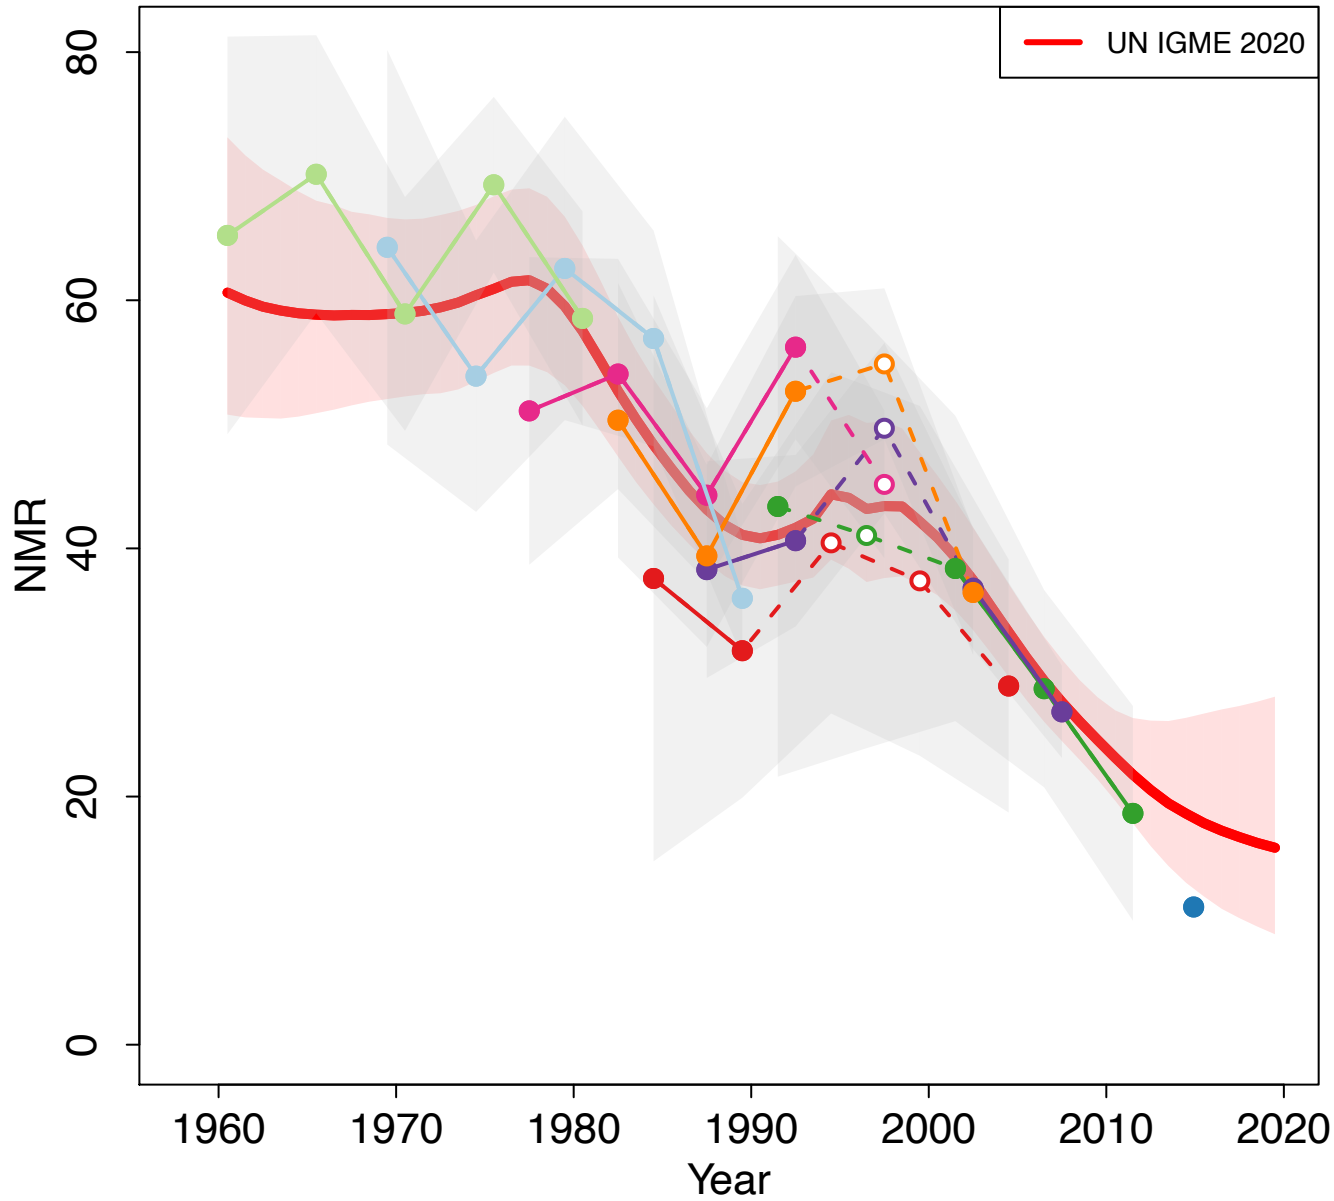

# Zoomed in

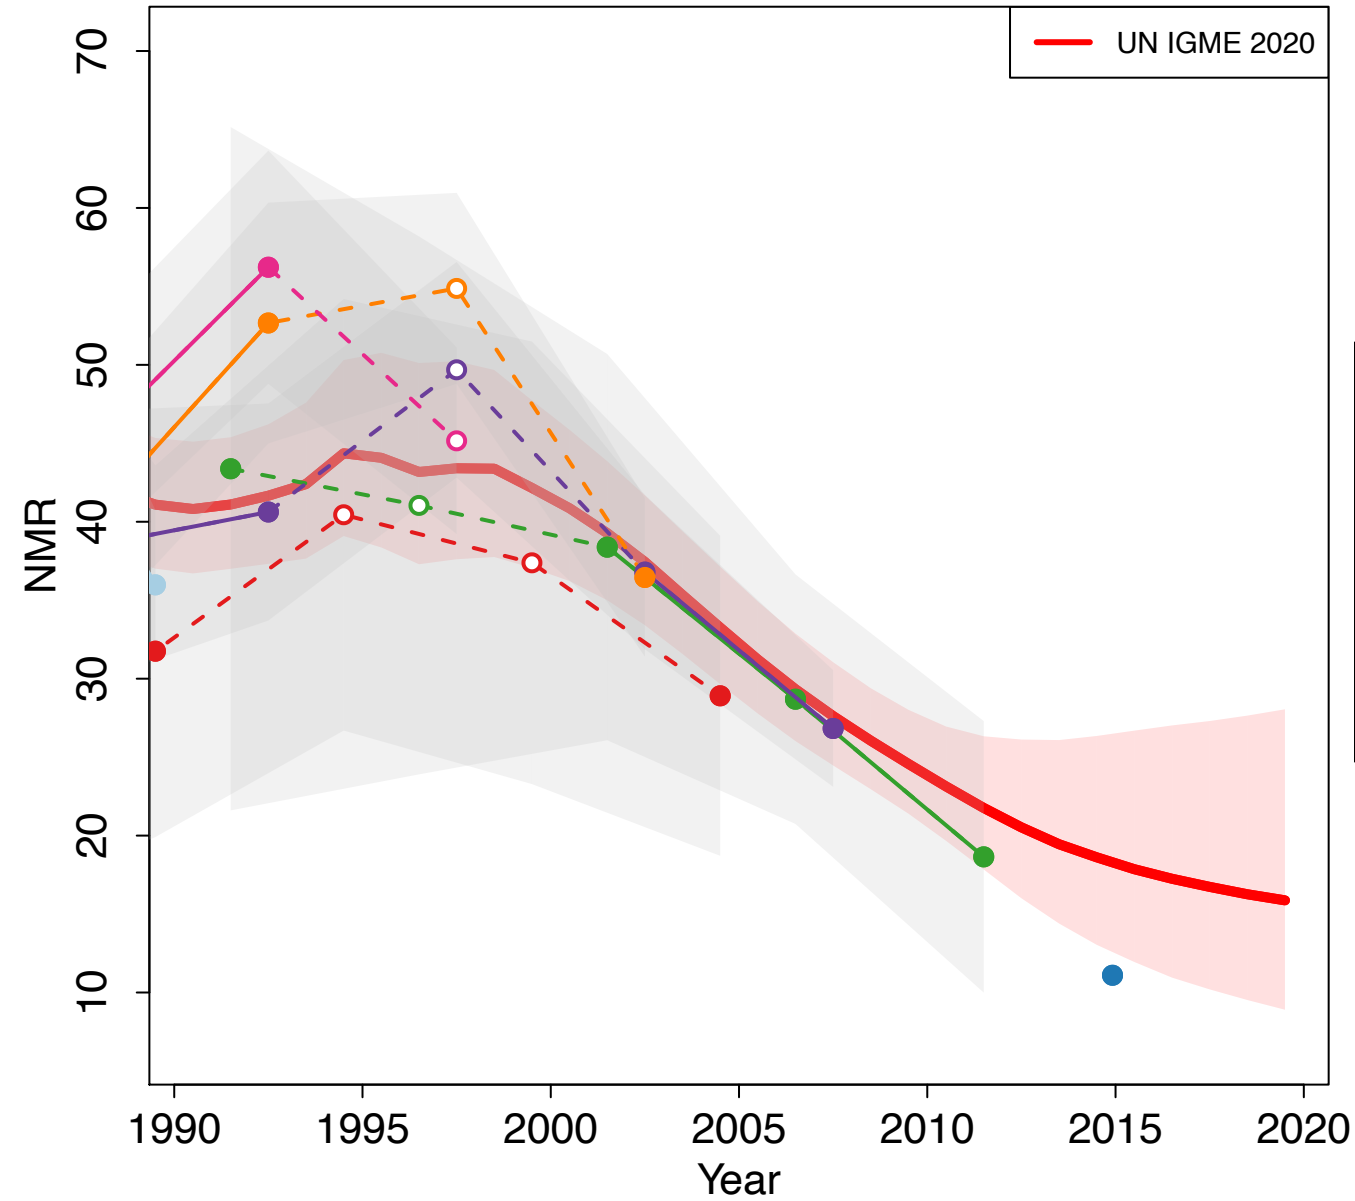

- World Fertility Survey 1983 (Other DHS)
- Demographic and Health Survey 1992 (DHS)
- Demographic and Health Survey 2000 (DHS)
- Demographic and Health Survey 2005 (DHS)
- Interim Demographic and Health Survey 2007–2008 (Other DHS)
- Demographic and Health Survey 2010 (DHS)
- Demographic and Health Survey 2014–2015 (DHS)
- Mortality Assessment Survey 2015 (Others)

# Saint Kitts and Nevis

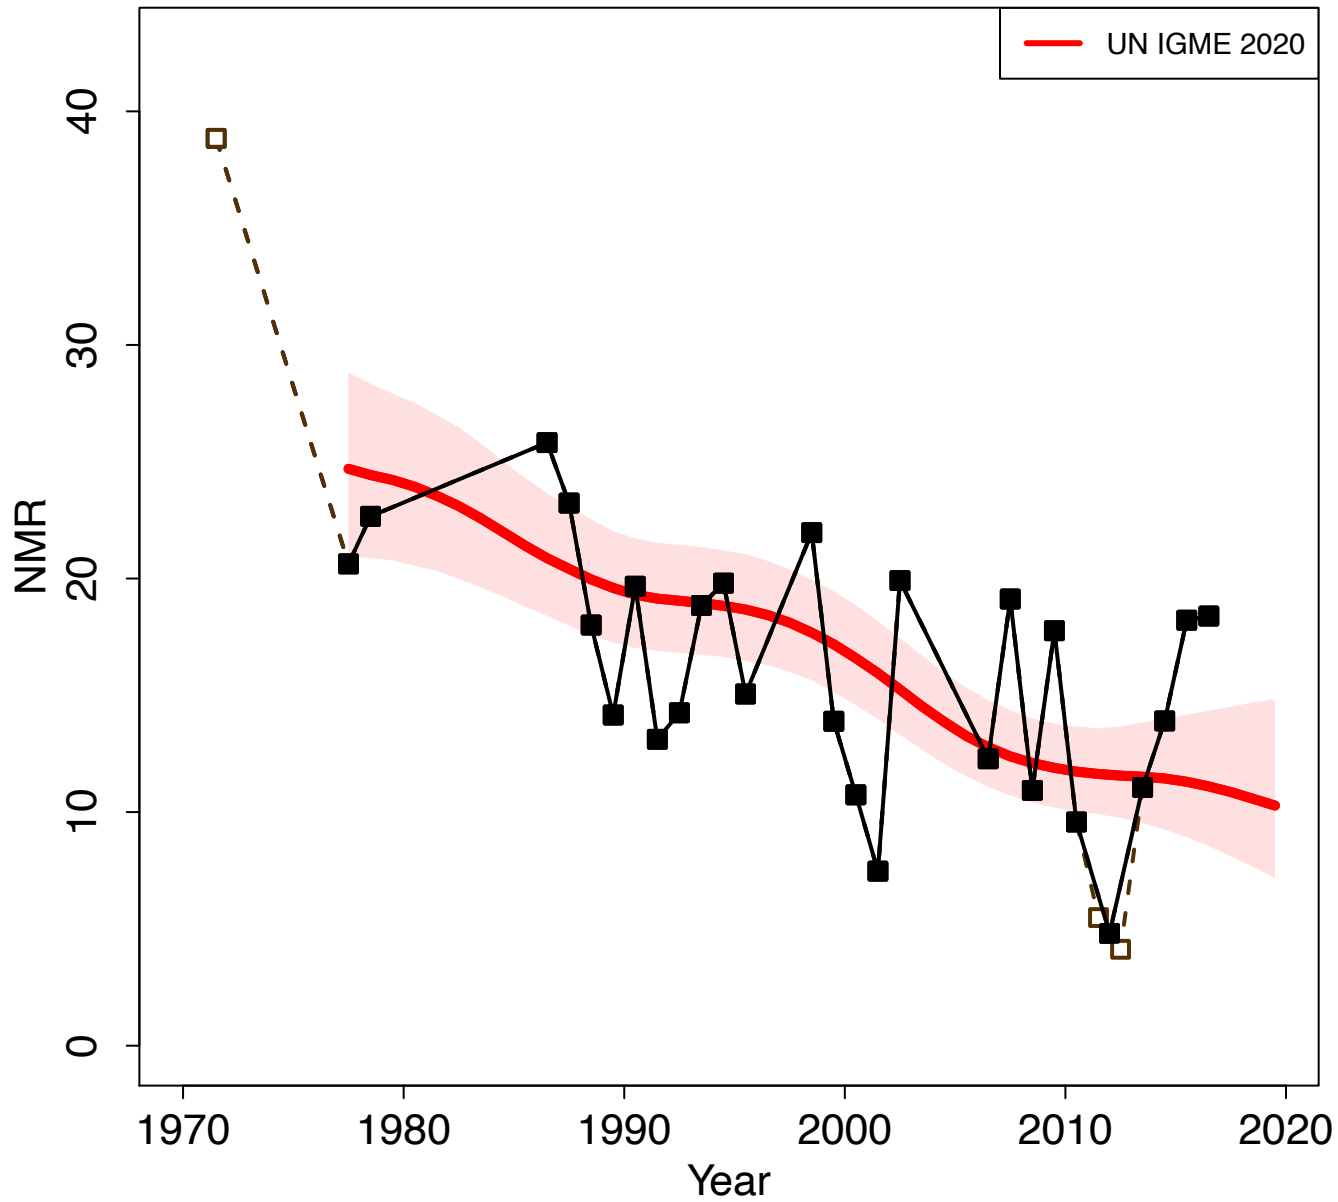

# Zoomed in

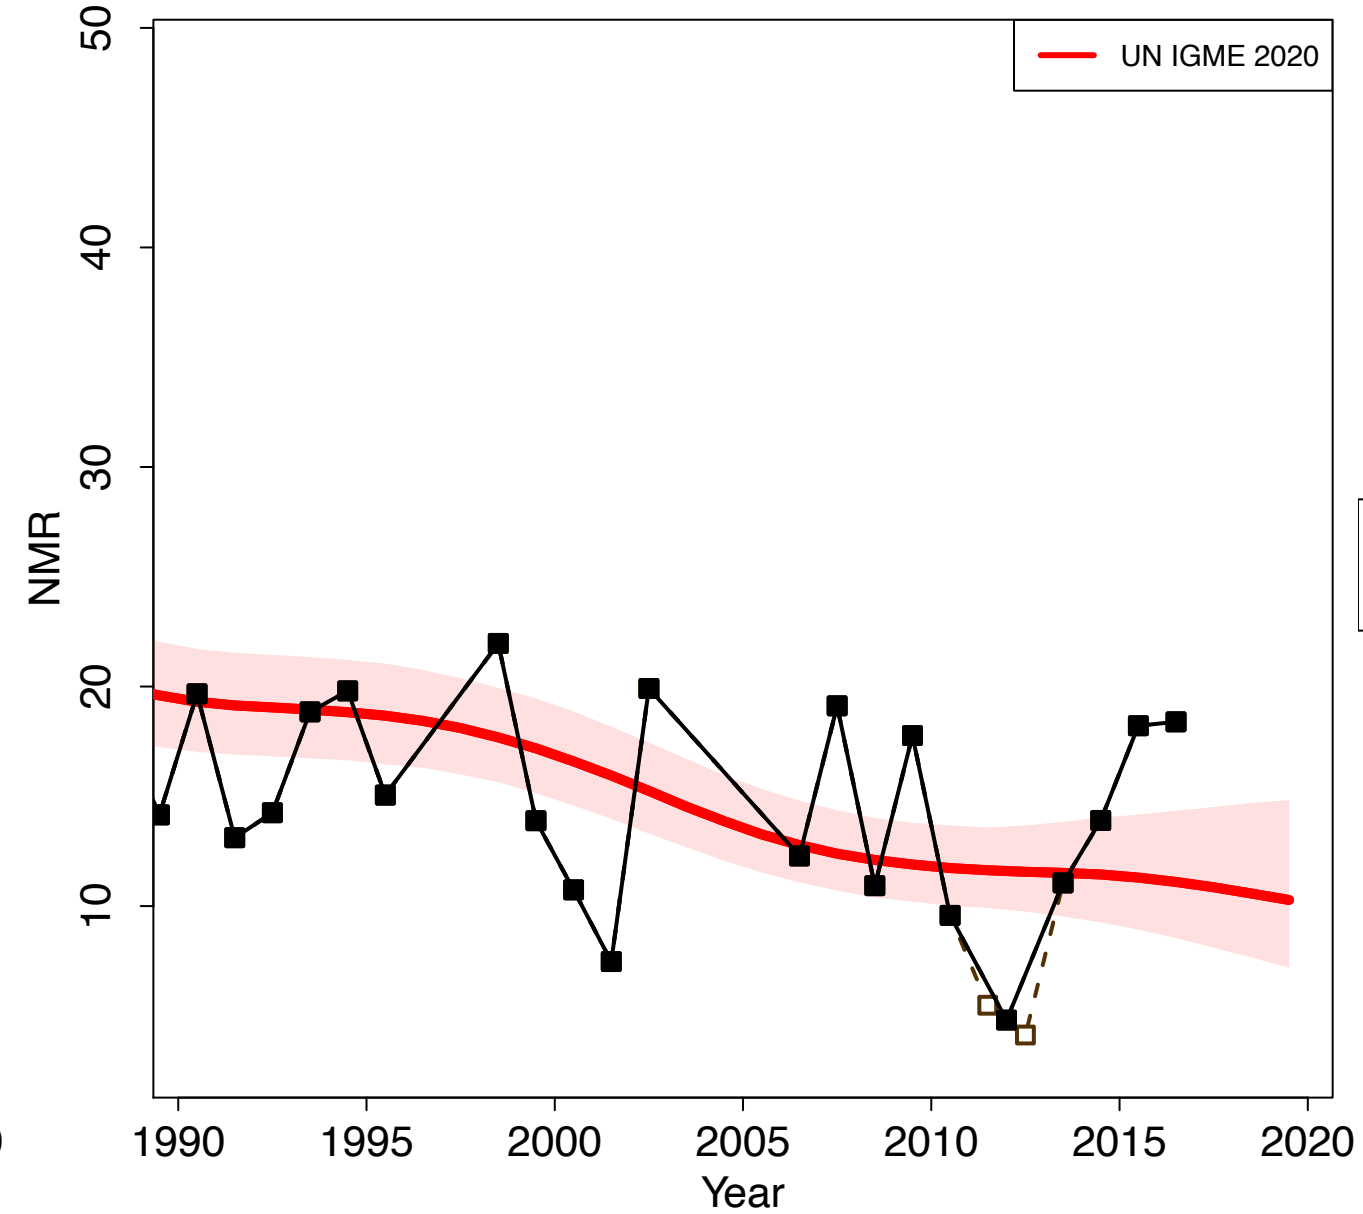

# Saint Lucia

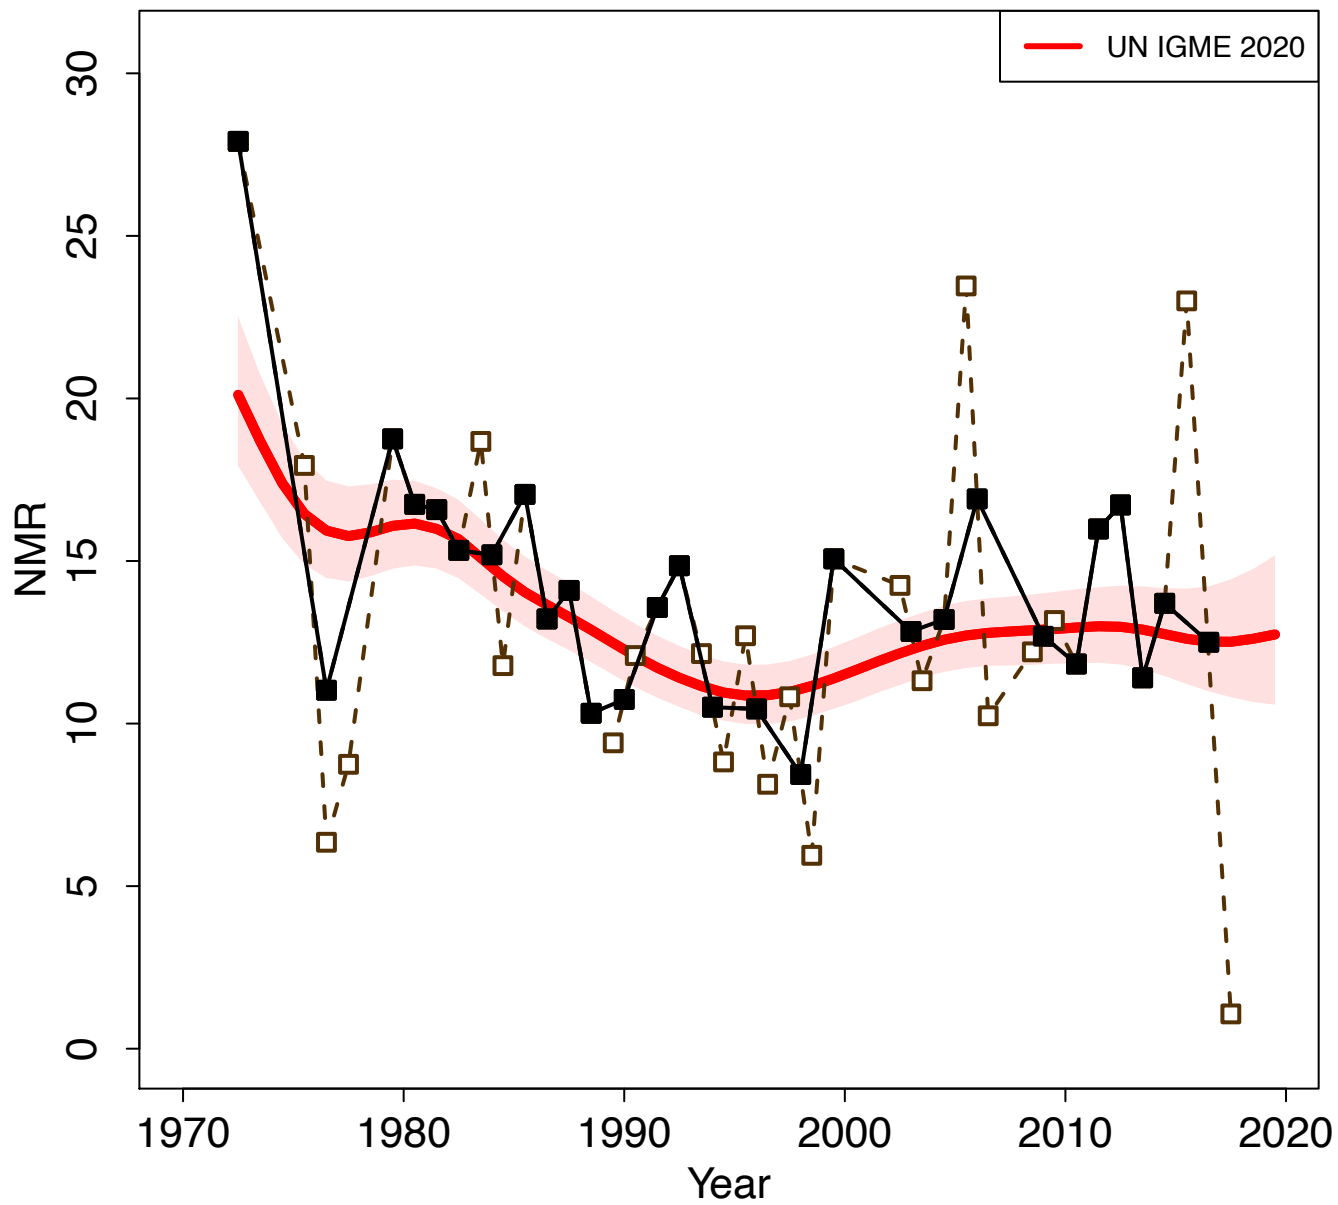

# Zoomed in

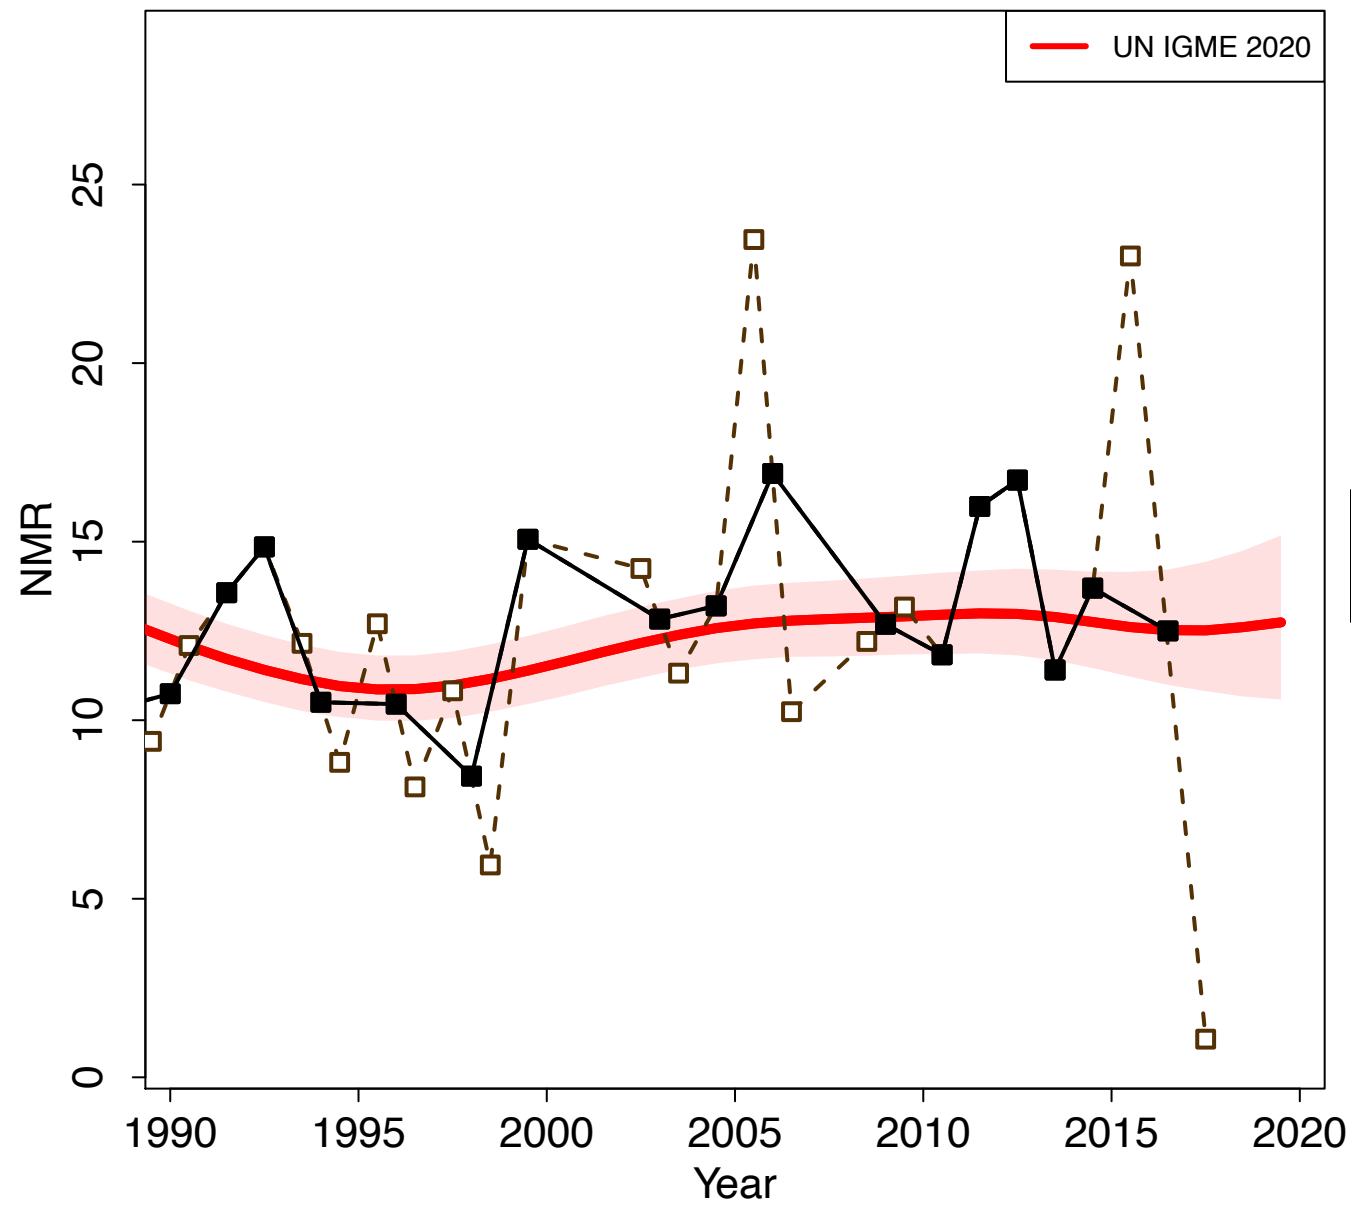

# Samoa

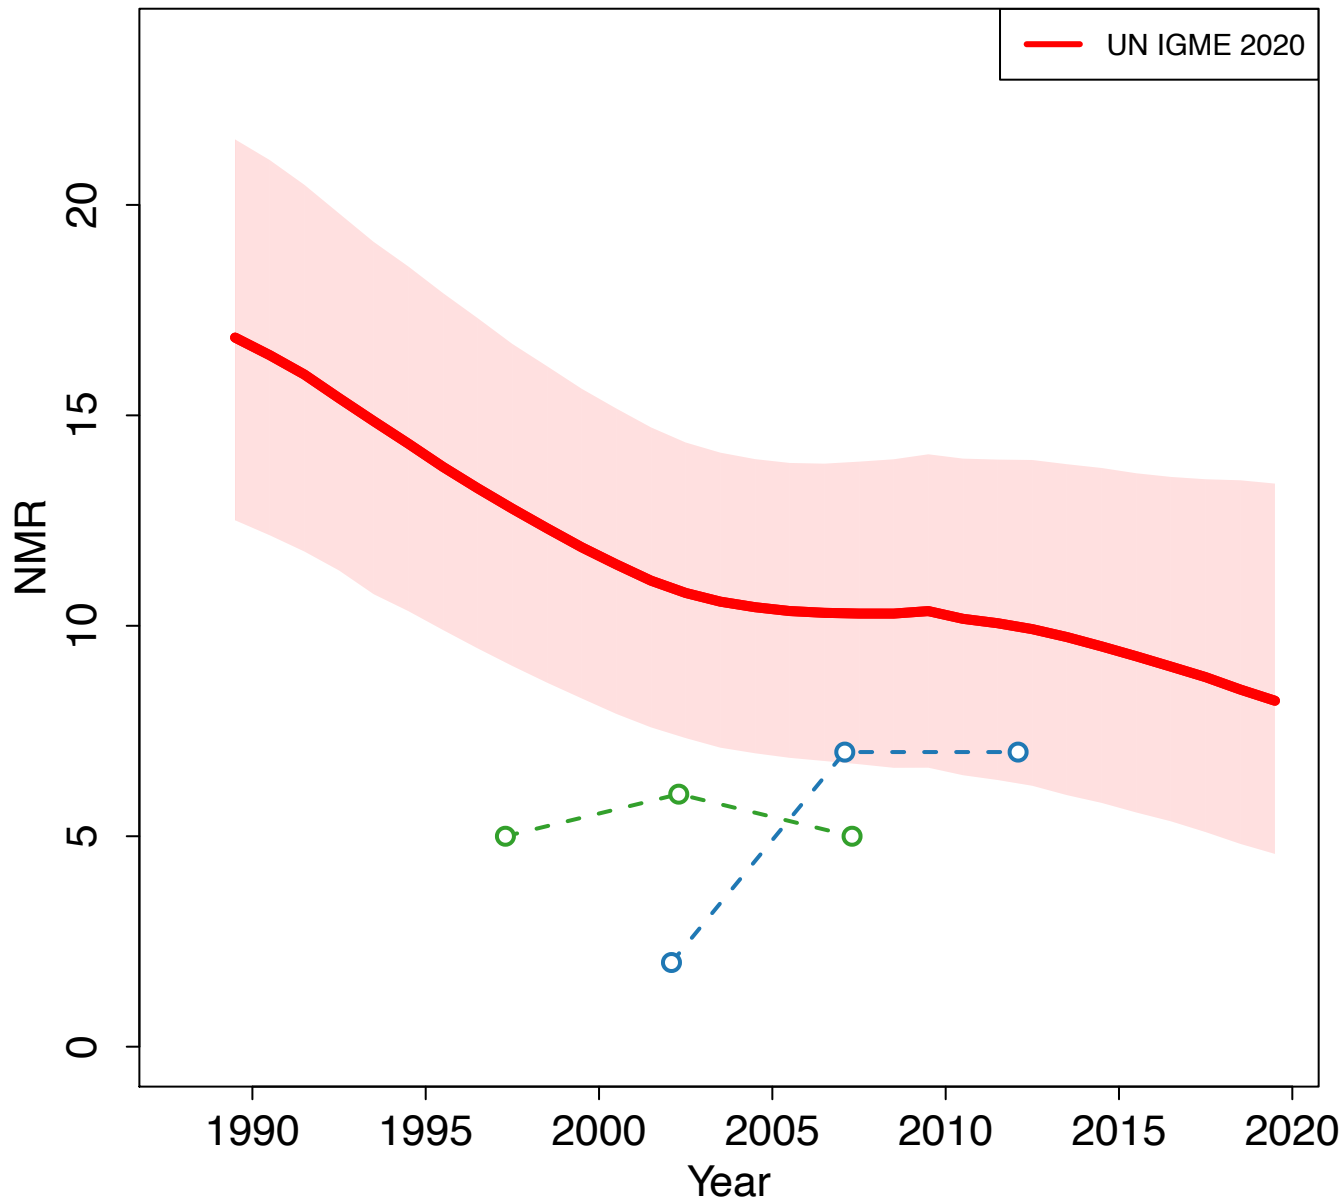

# Zoomed in

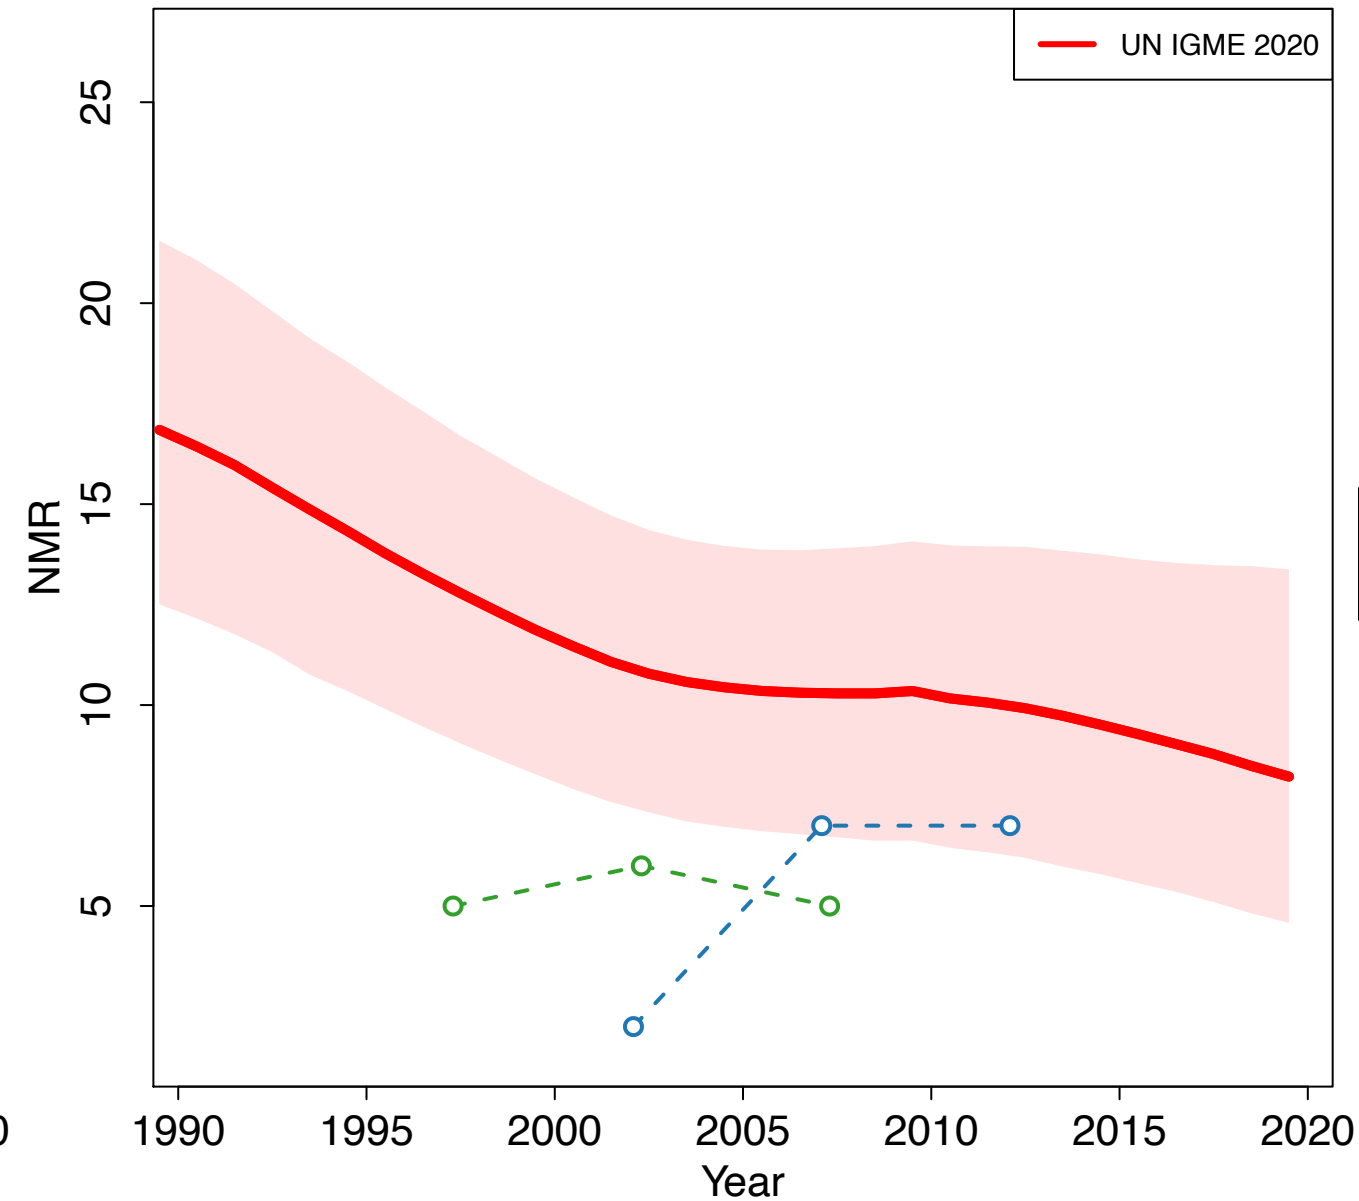



# San Marino

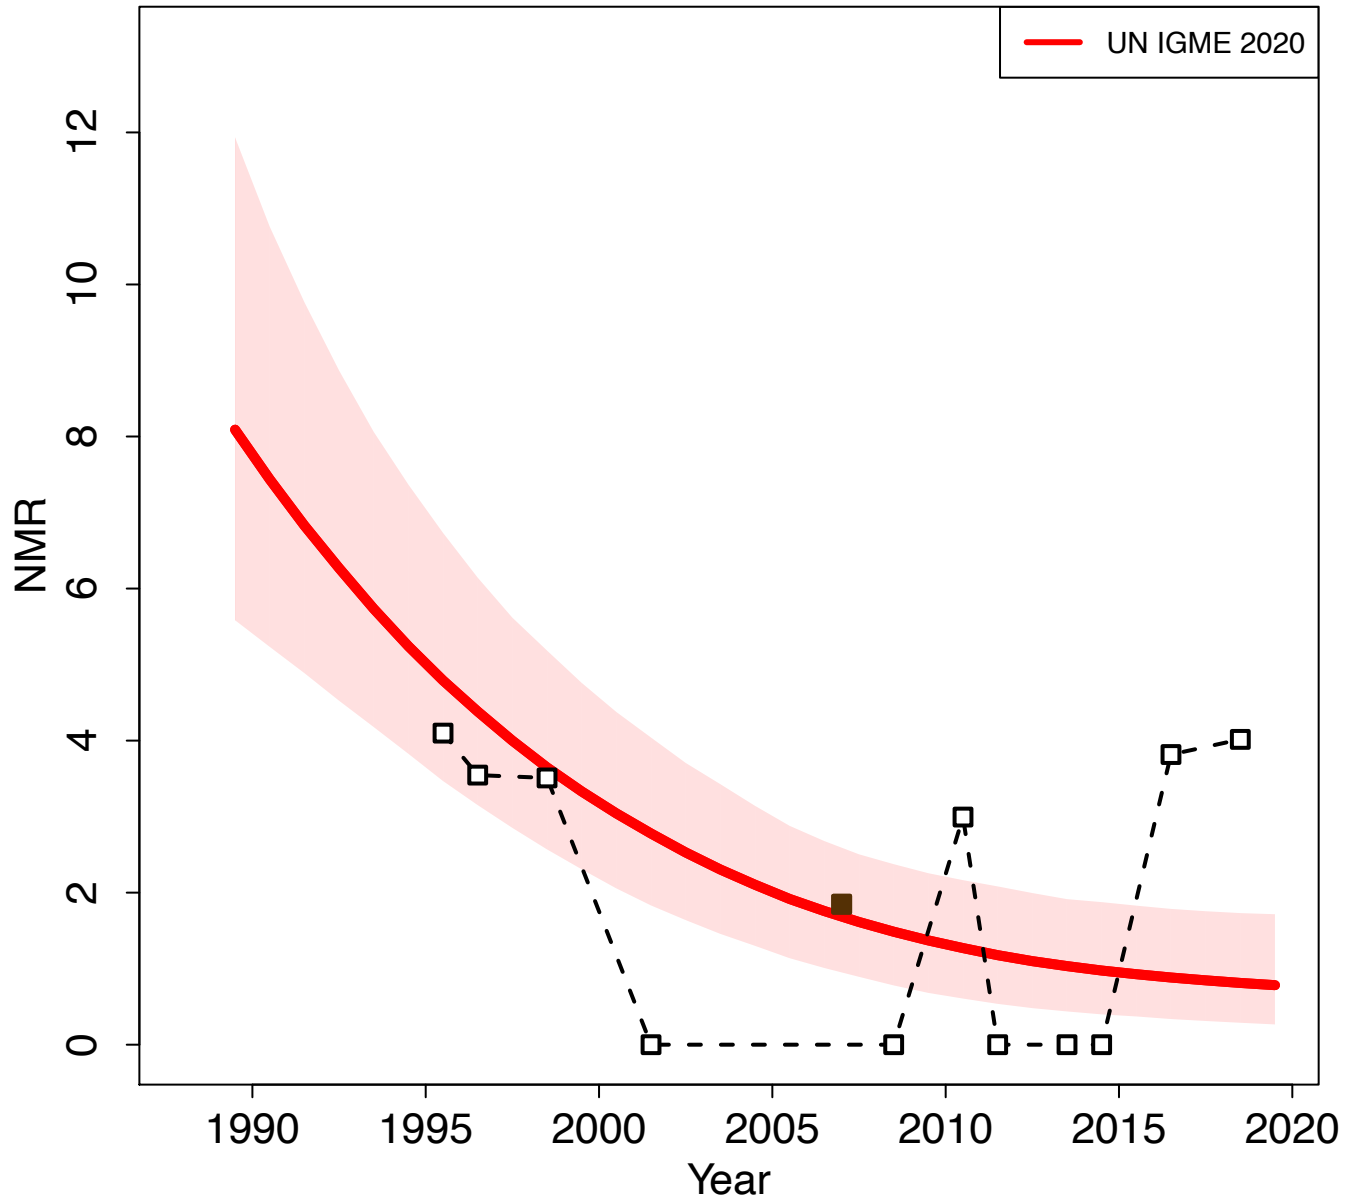

# Zoomed in

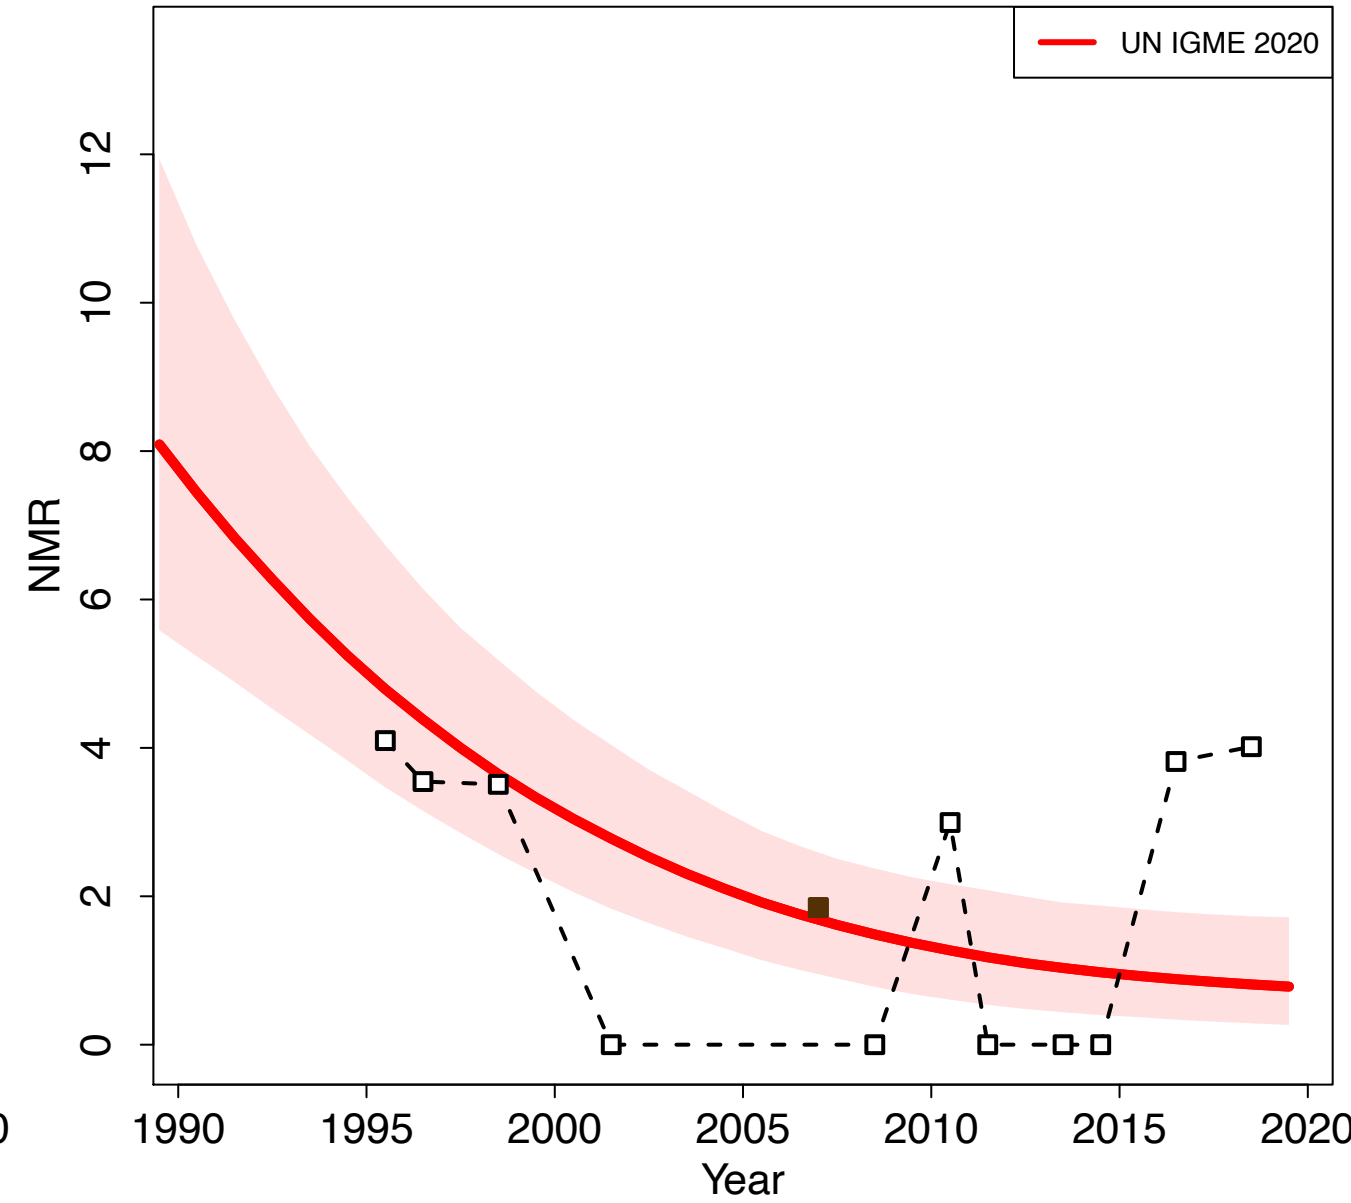

# Sao Tome and Principe

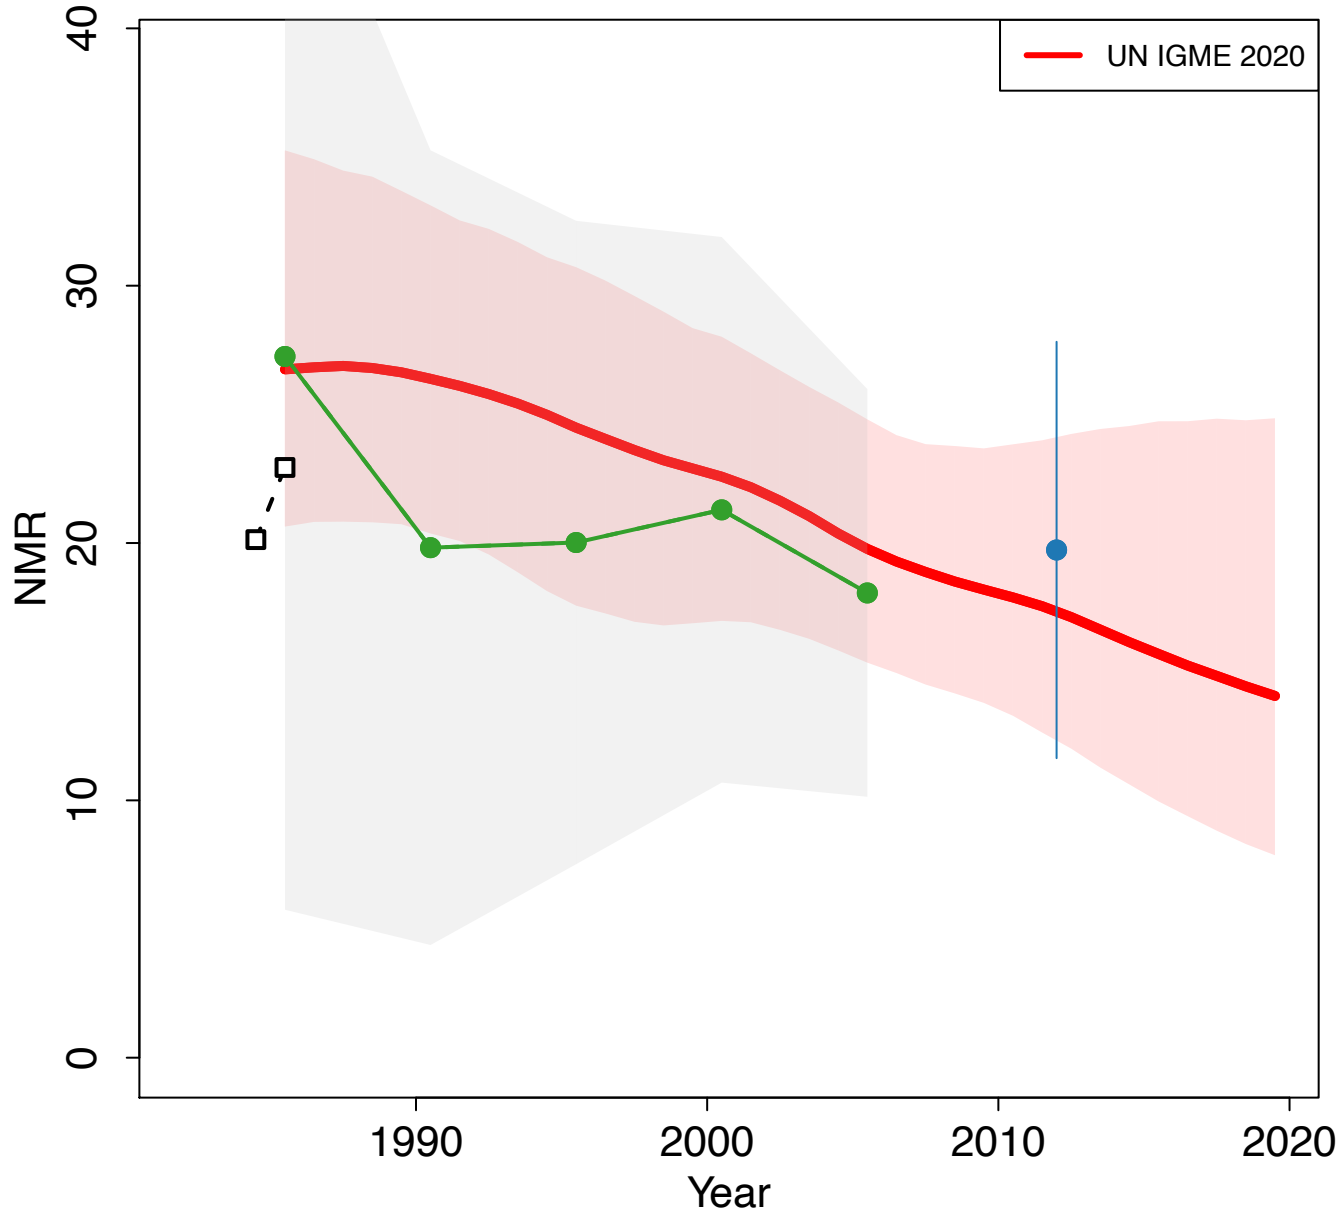

# Zoomed in

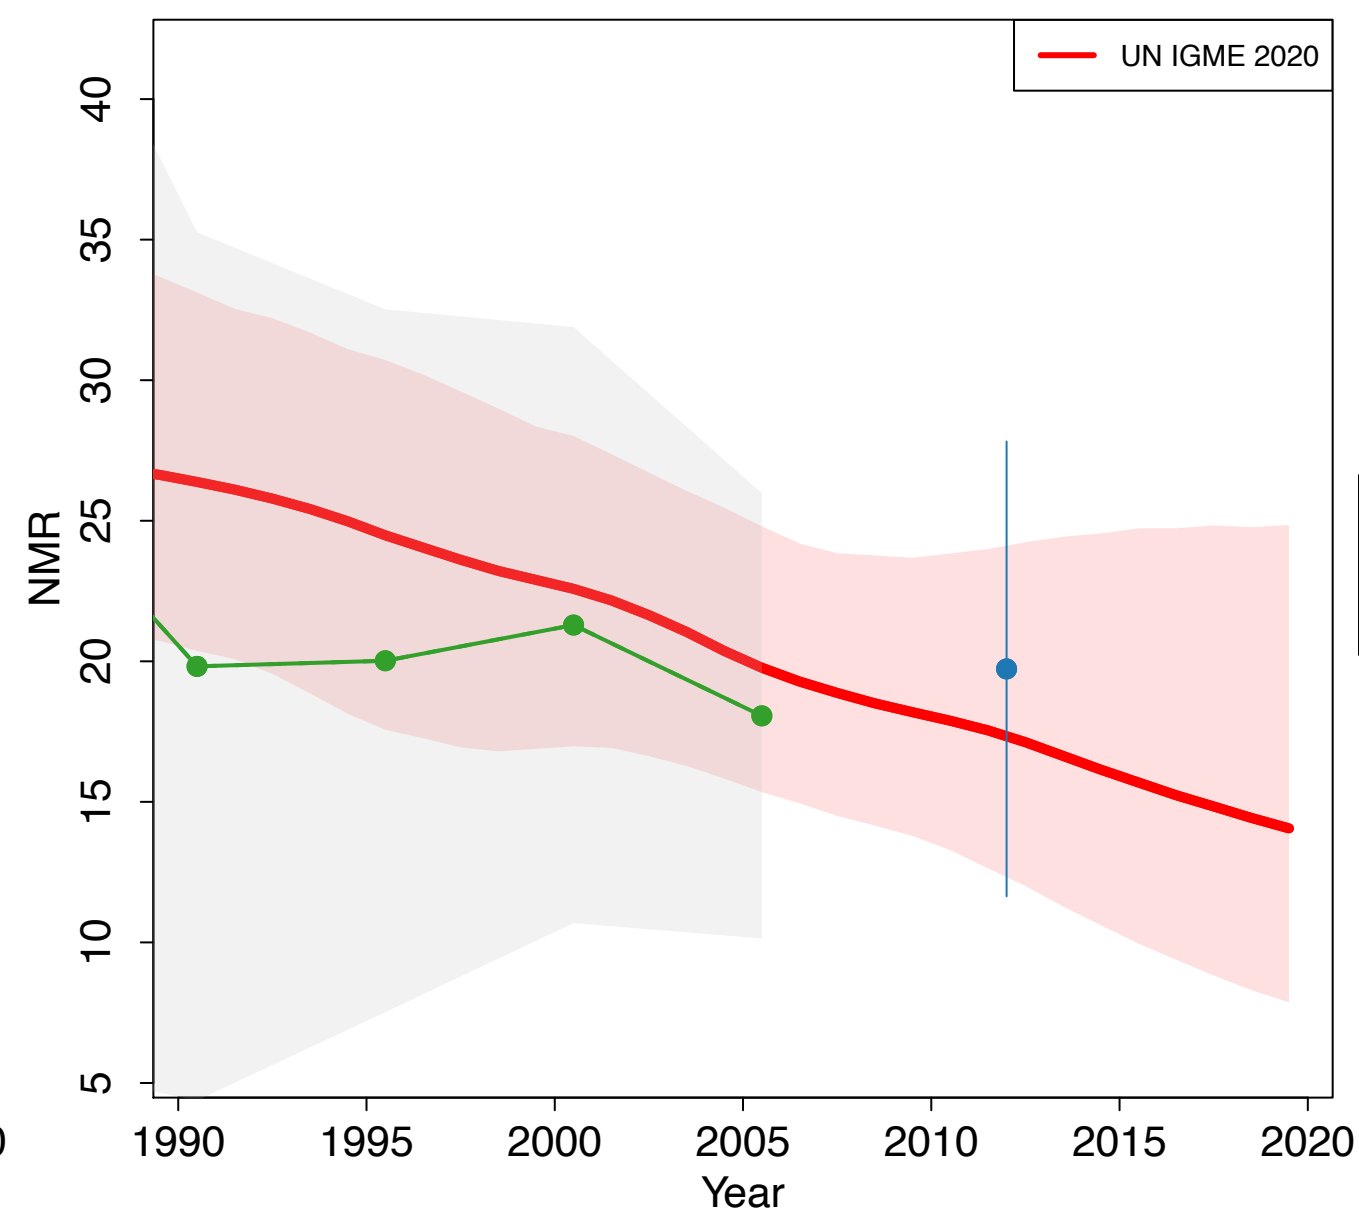

# Saudi Arabia

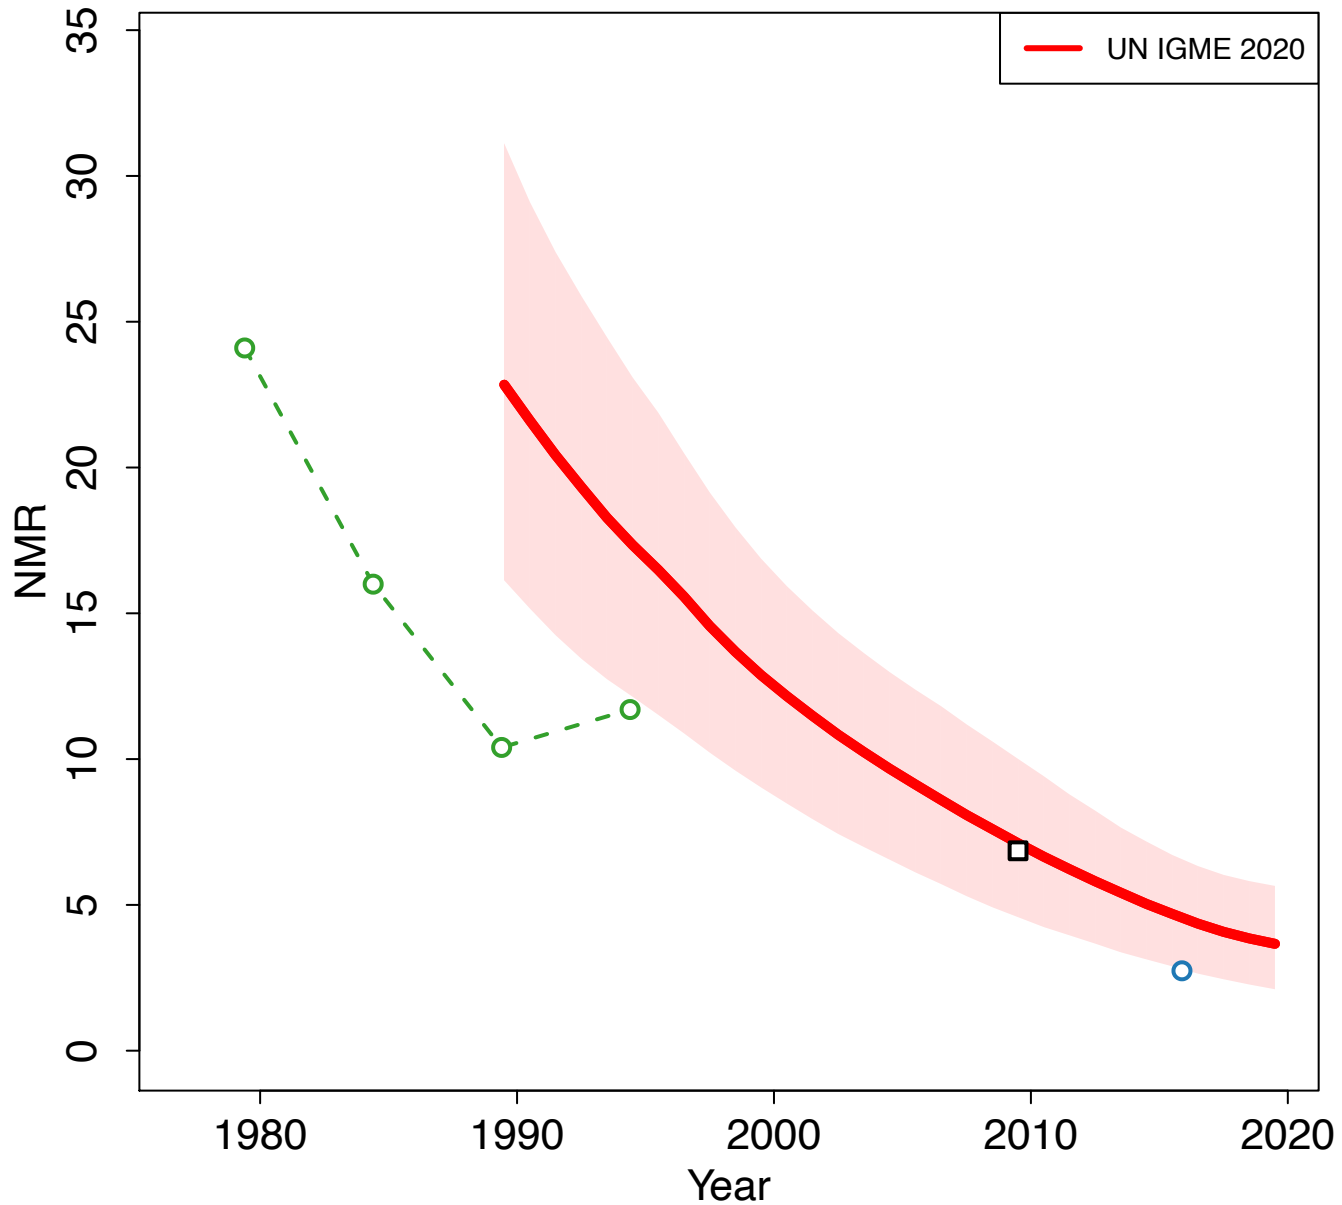

# Zoomed in

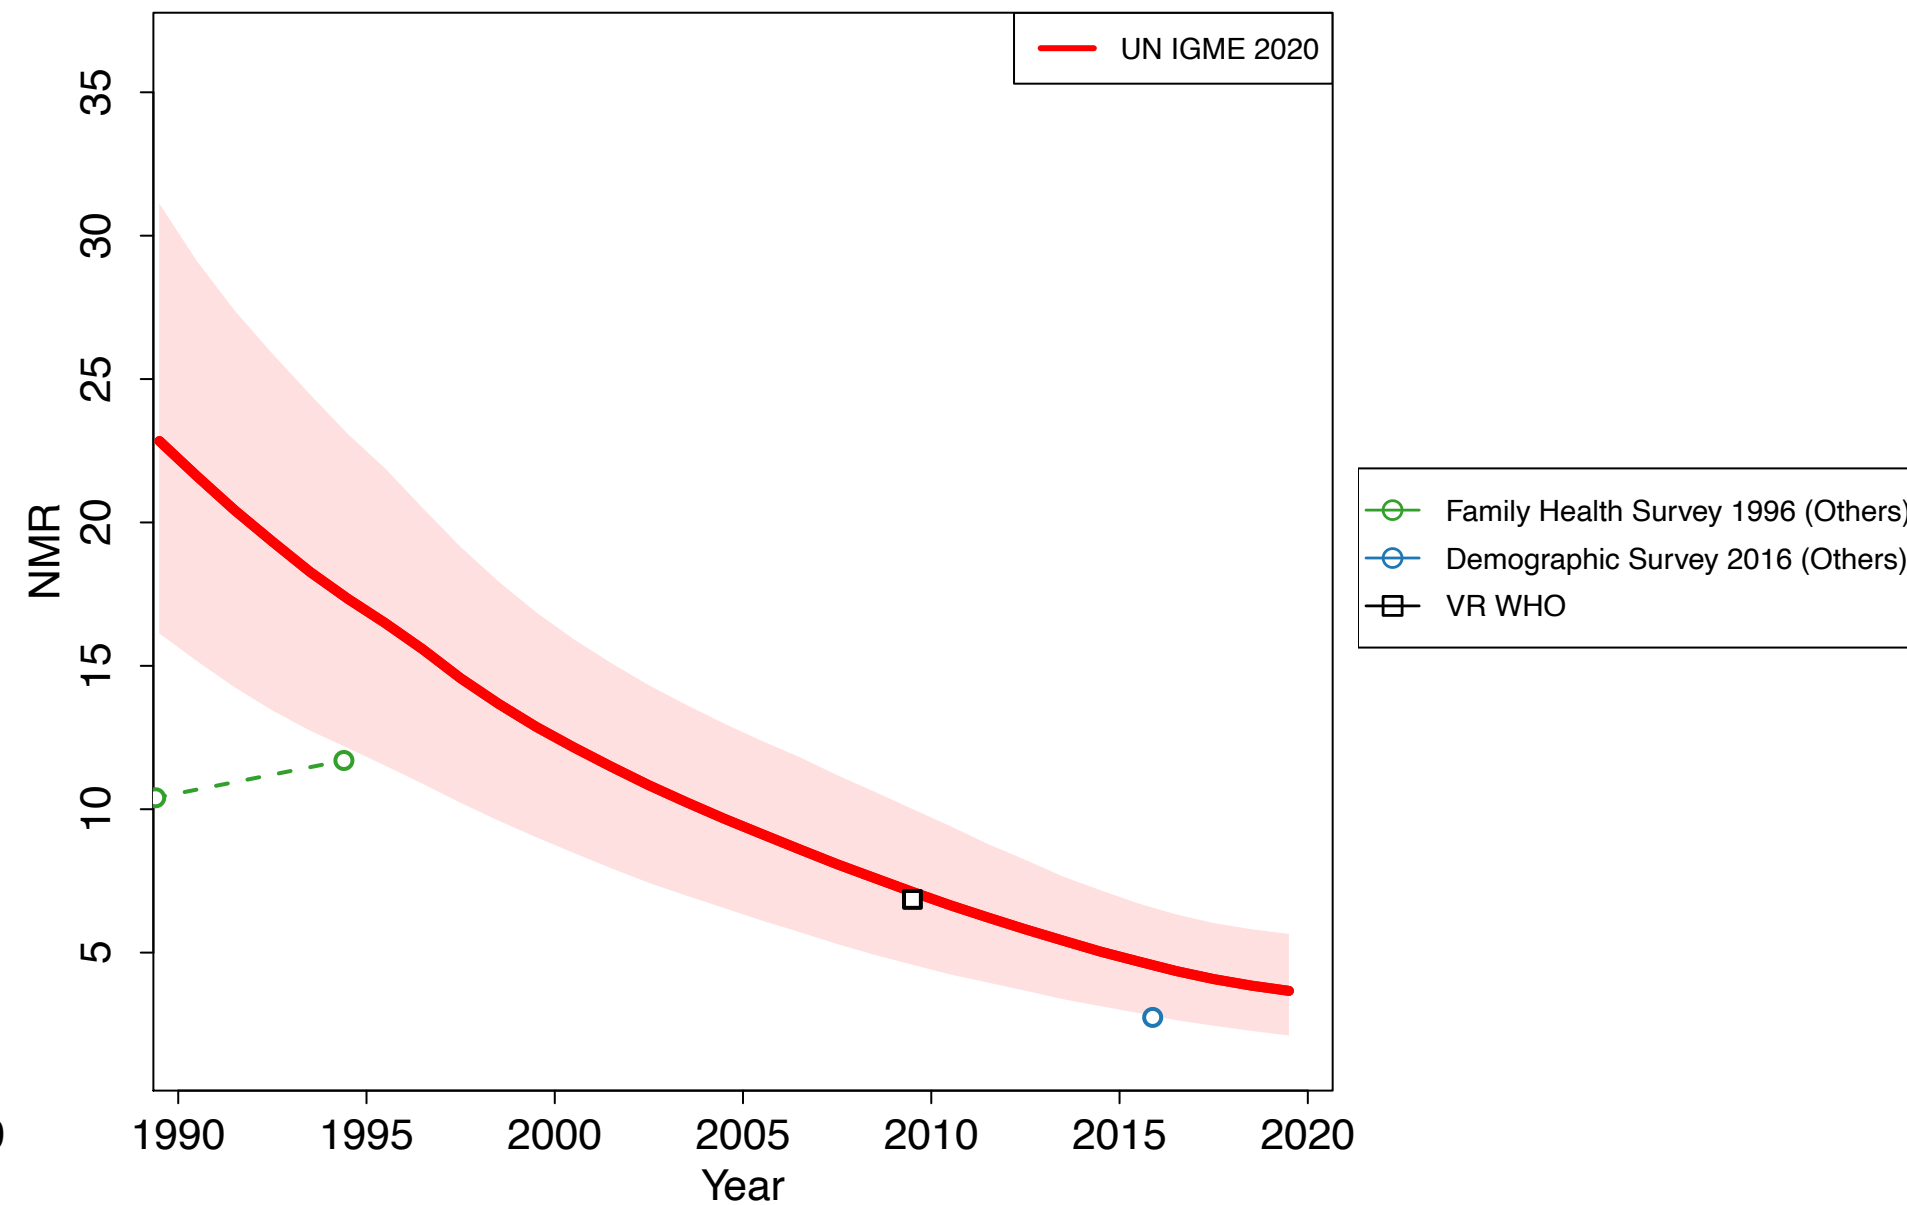

# Senegal

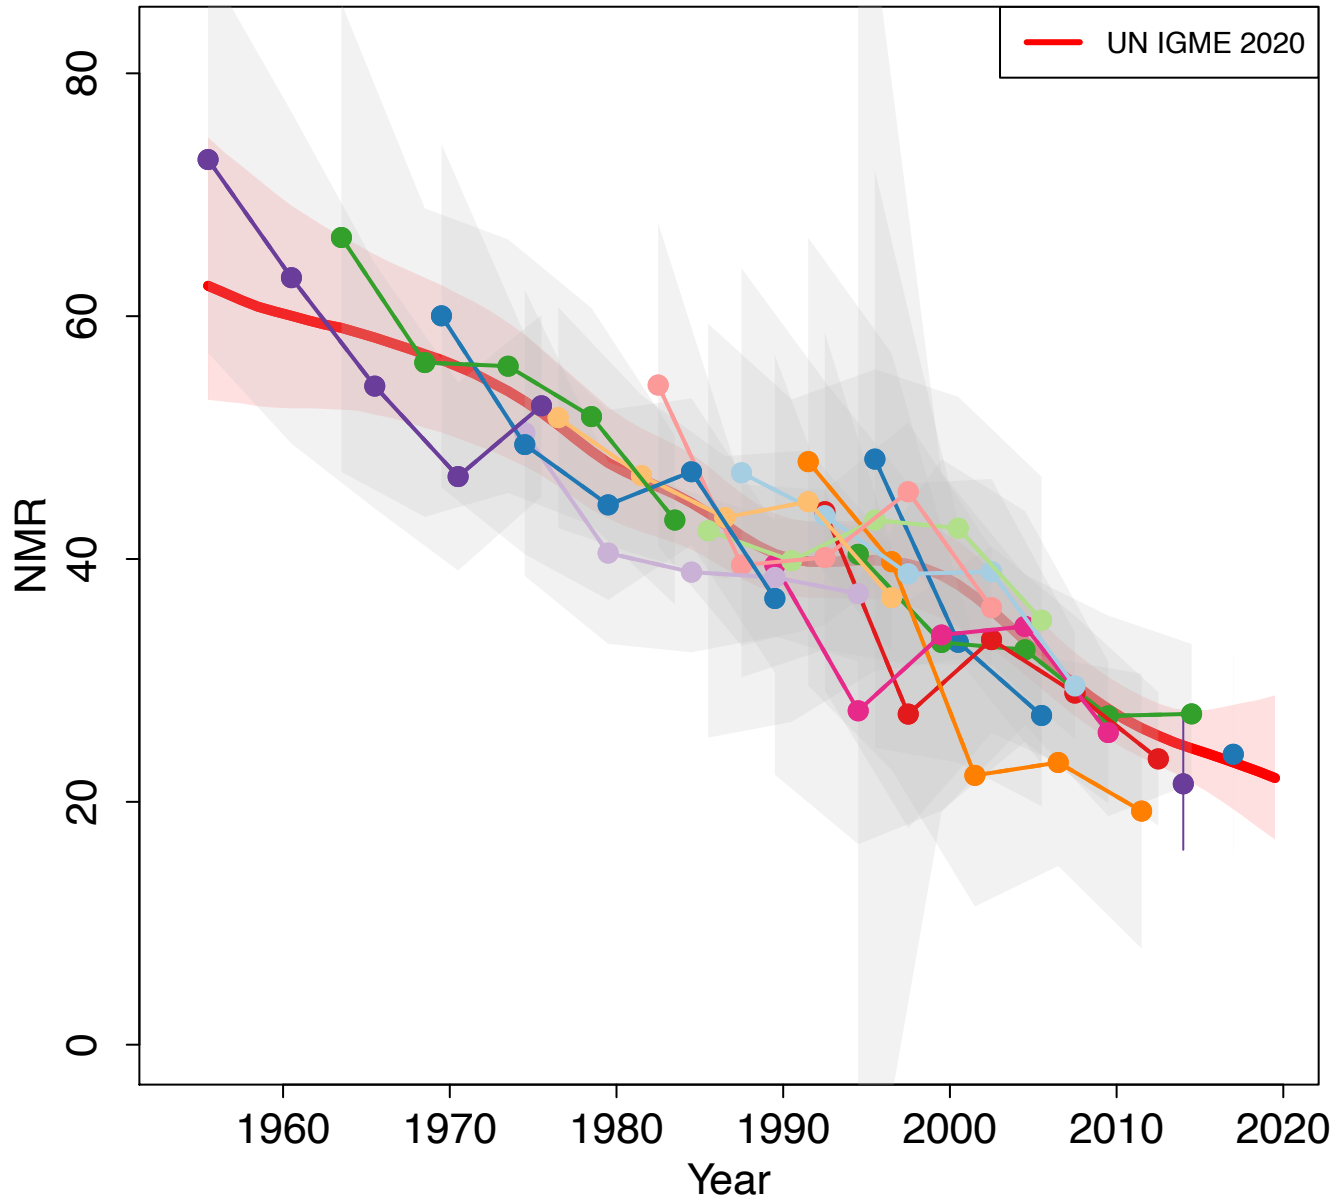

# Zoomed in

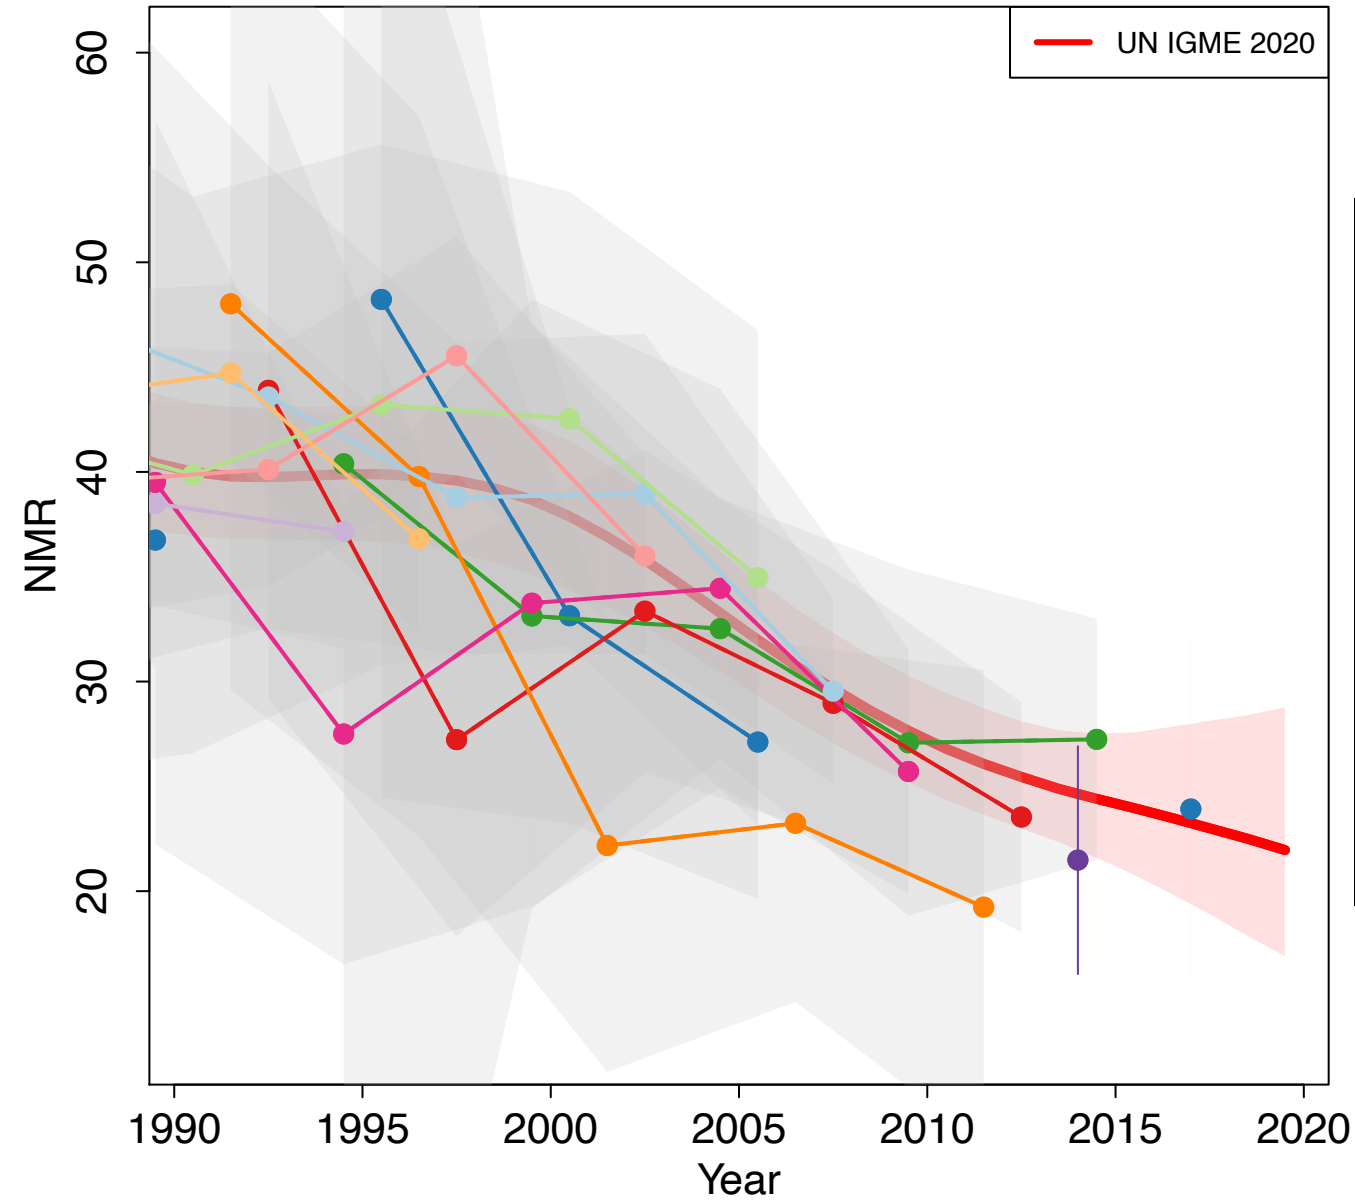

- World Fertility Survey 1978 (Other DHS)
- Demographic and Health Survey 1986 (DHS)
- Demographic and Health Survey 1992-1993 (DHS)
- Demographic and Health Survey 1997 (DHS)
- Demographic and Health Survey 2000 (DHS)
- Demographic and Health Survey 2005 (DHS)
- Malaria Indicator Survey 2008-2009 (Other DHS)
- Demographic and Health Survey 2010-2011 (DHS)
- Demographic and Health Survey 2012-2013 (DHS)
- Demographic and Health Survey 2014 (DHS)
- Demographic and Health Survey 2015 (DHS)
- Demographic and Health Survey 2016 (DHS)
- Demographic and Health Survey 2017 (DHS)
- Demographic and Health Survey 2018 (DHS)

# Serbia

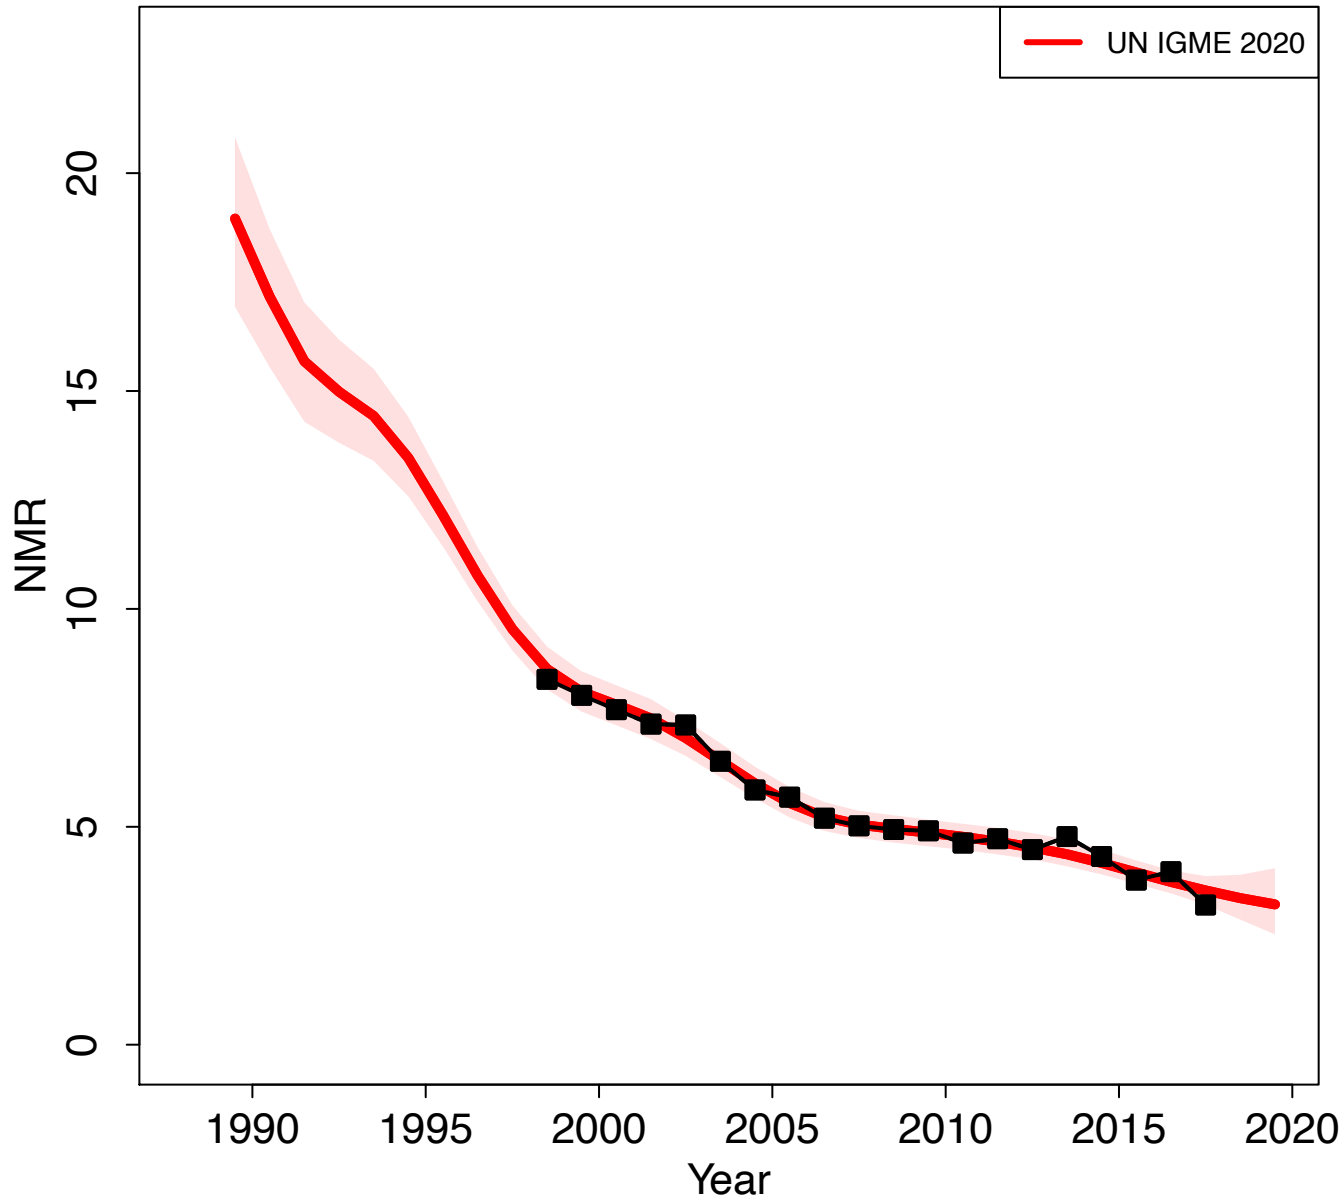

# Zoomed in

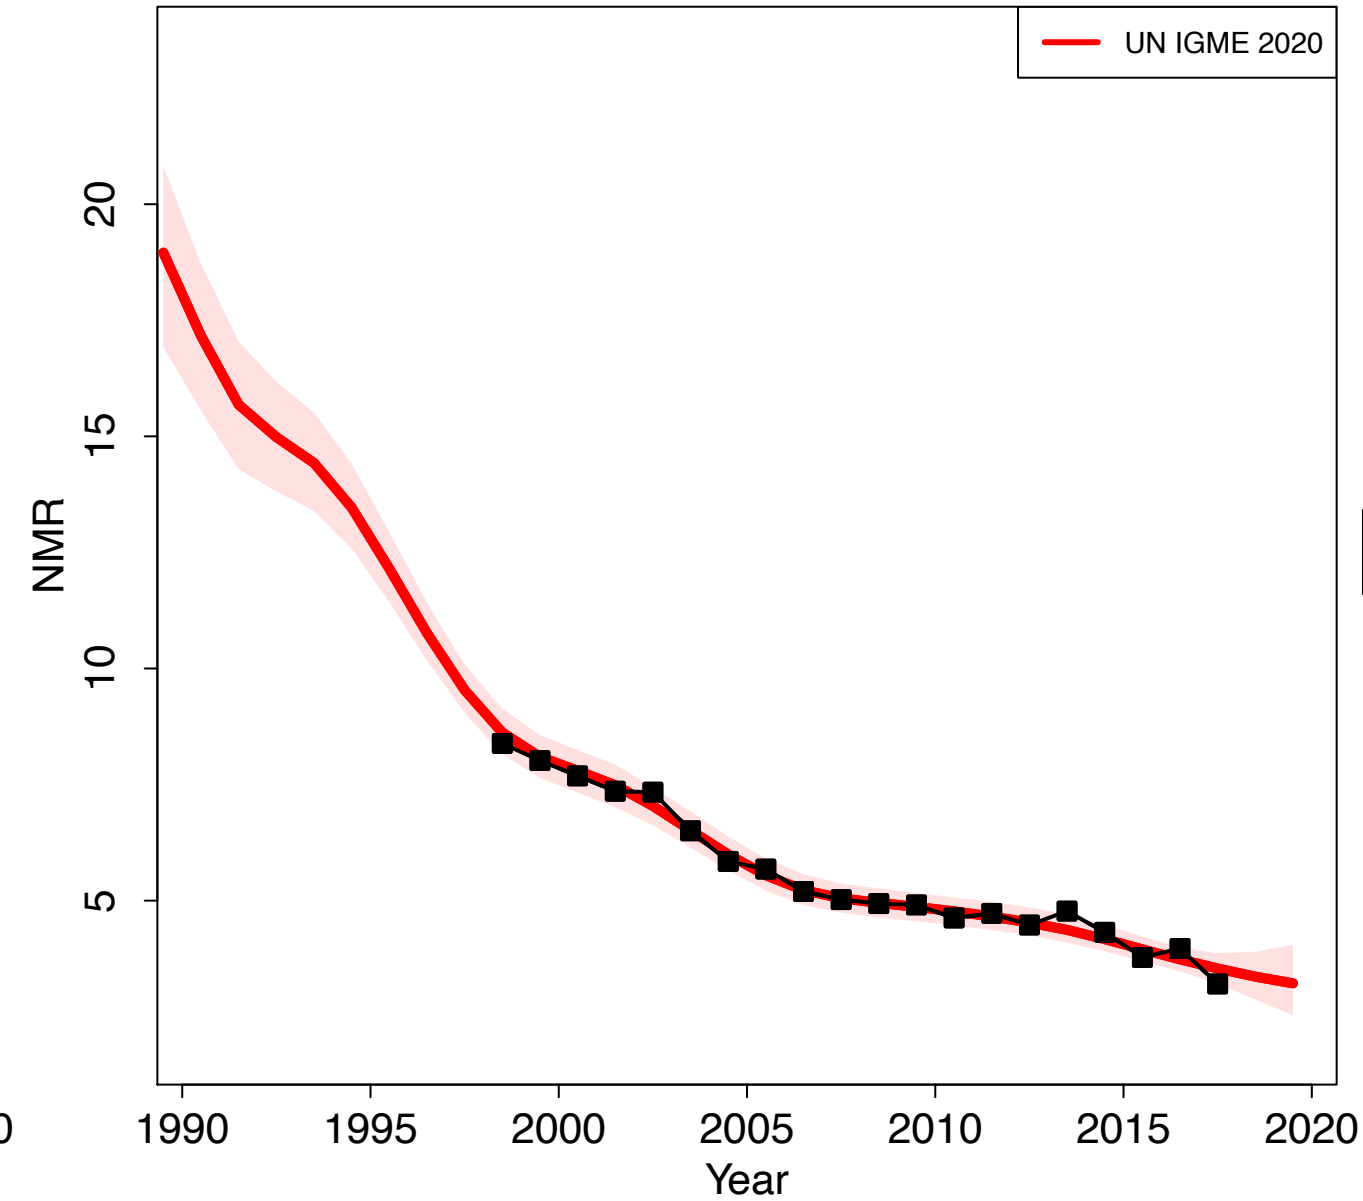

# Seychelles

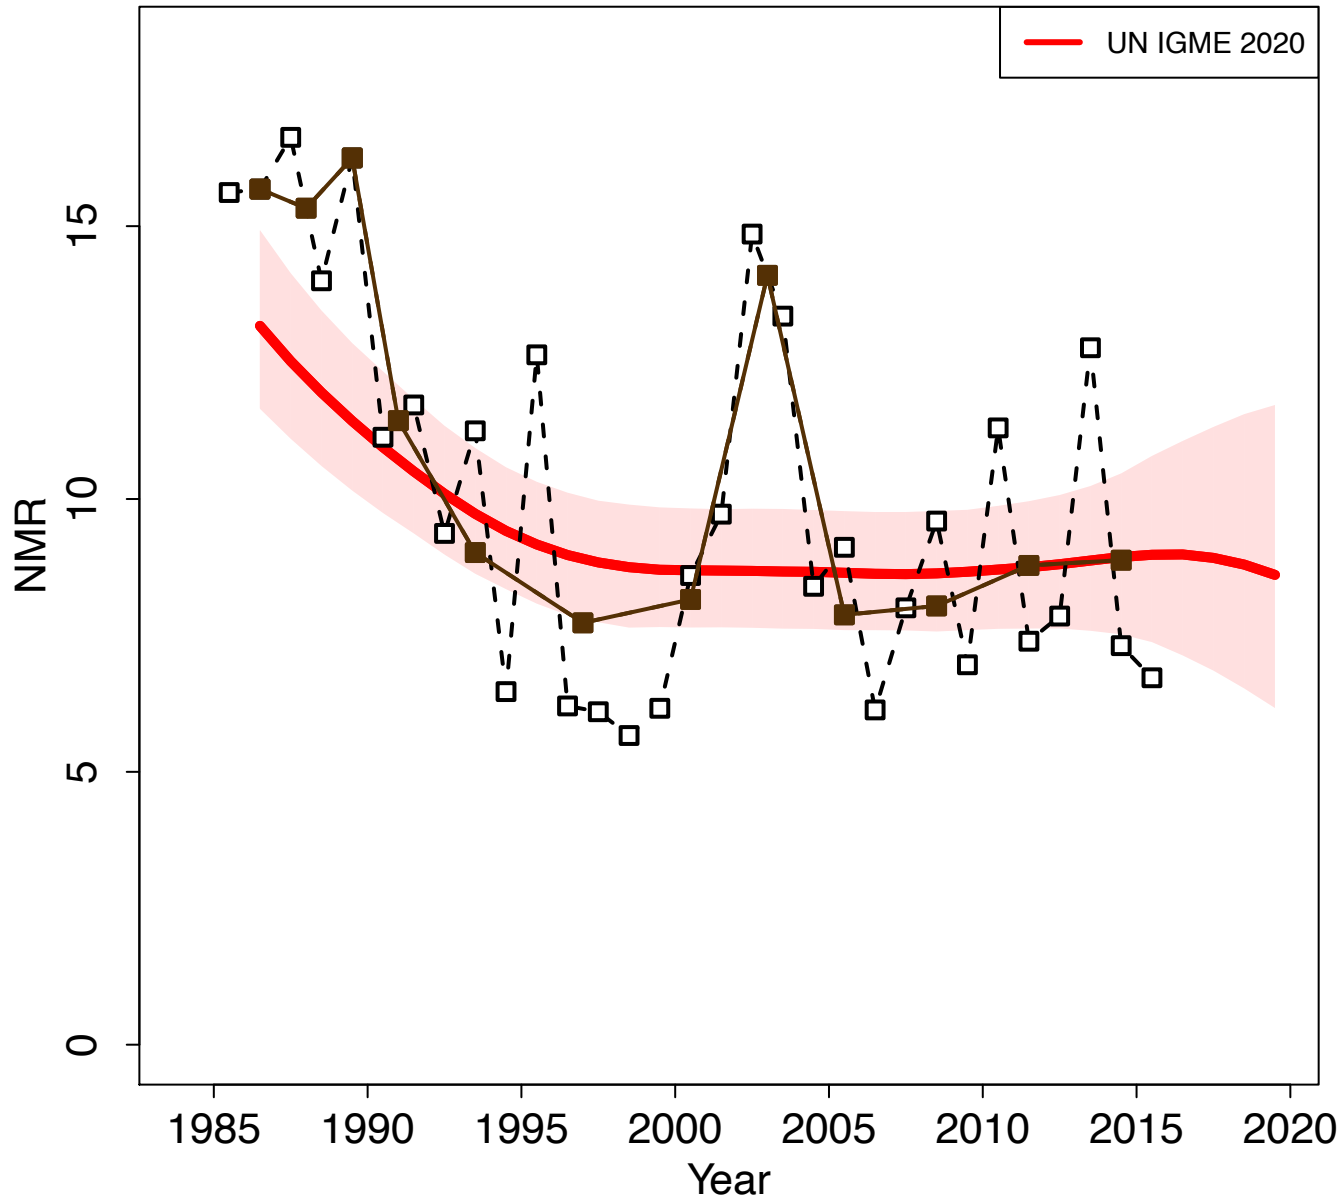

# Zoomed in

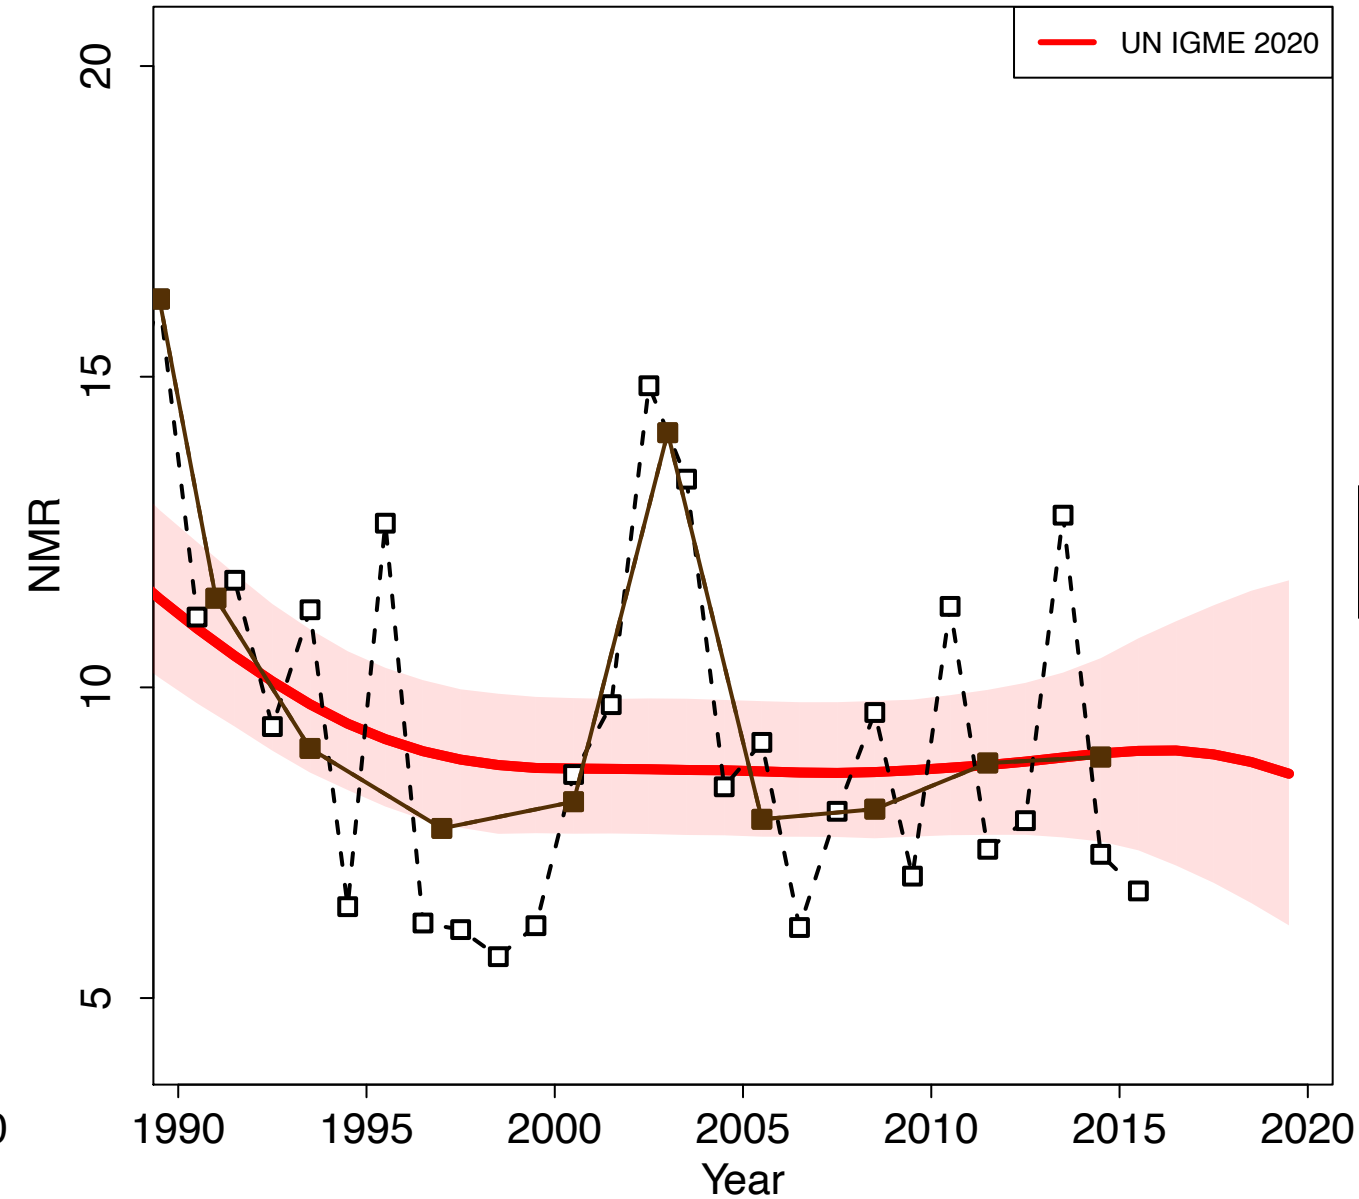

# Sierra Leone

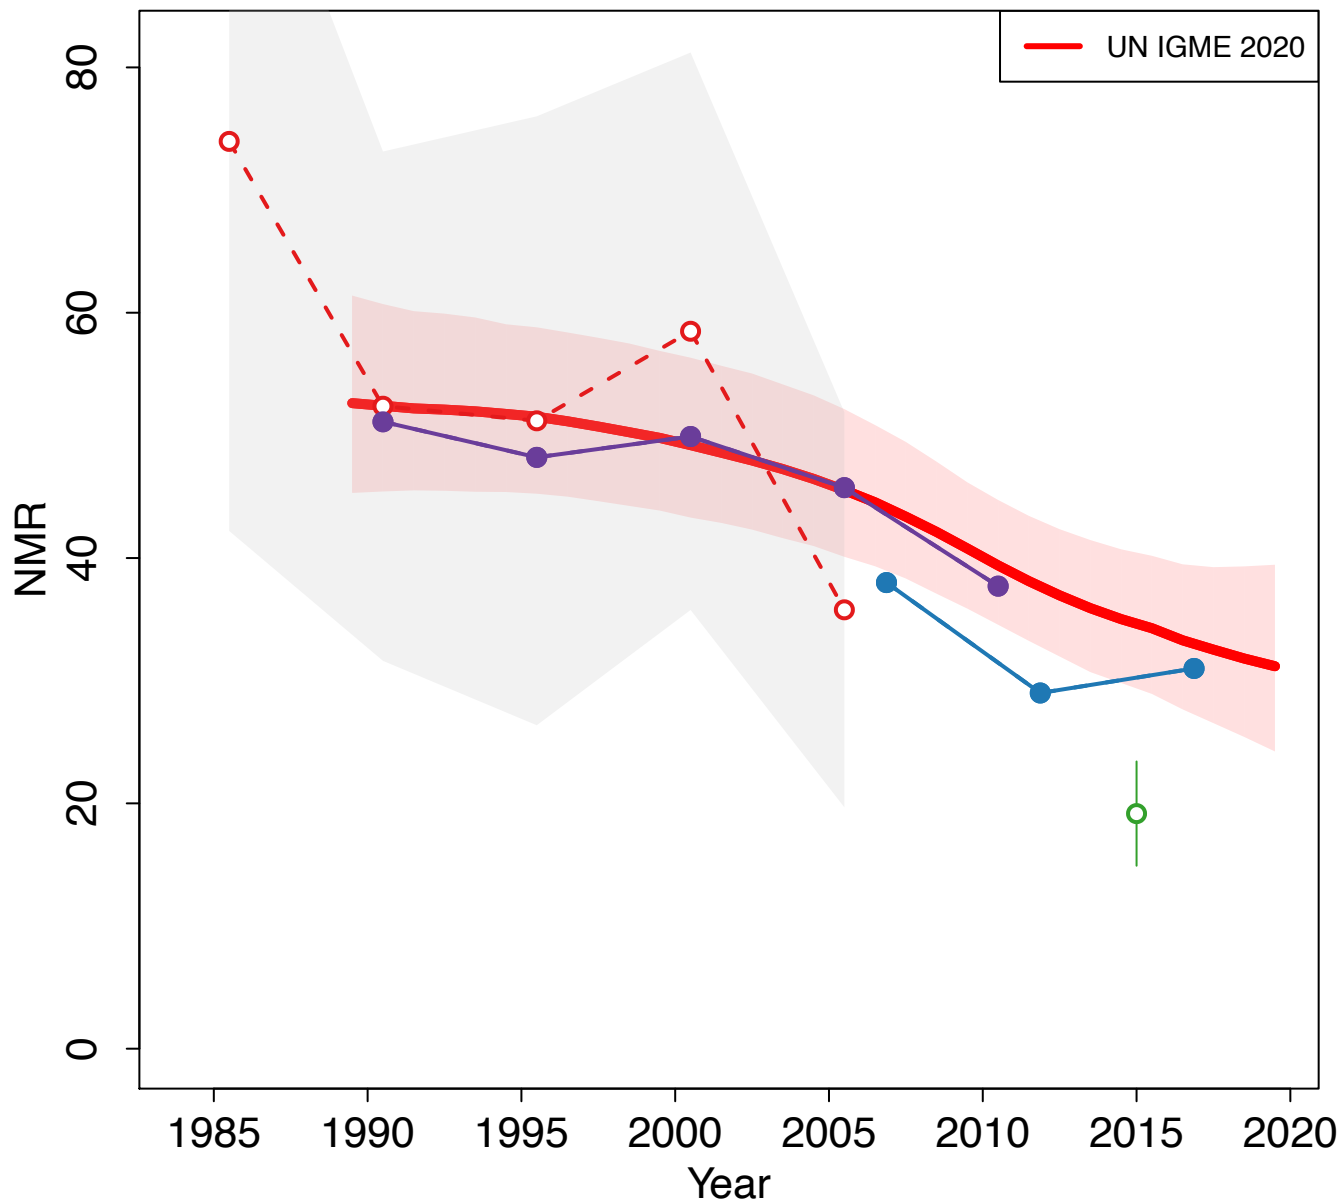

# Zoomed in

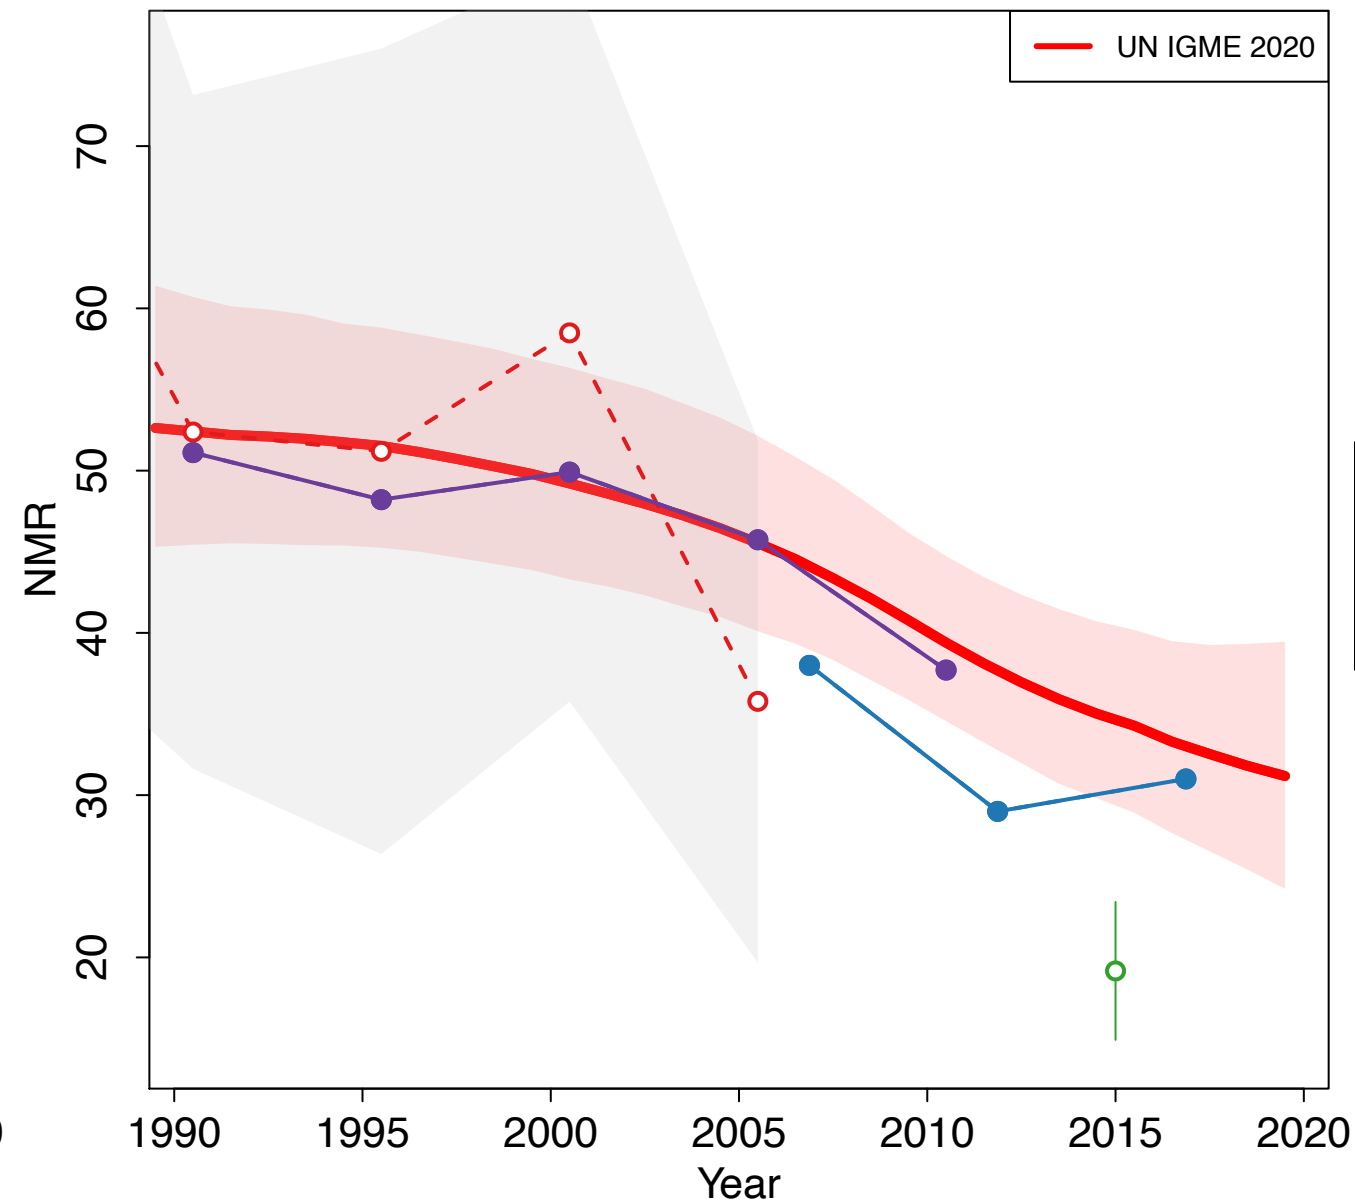

# Singapore

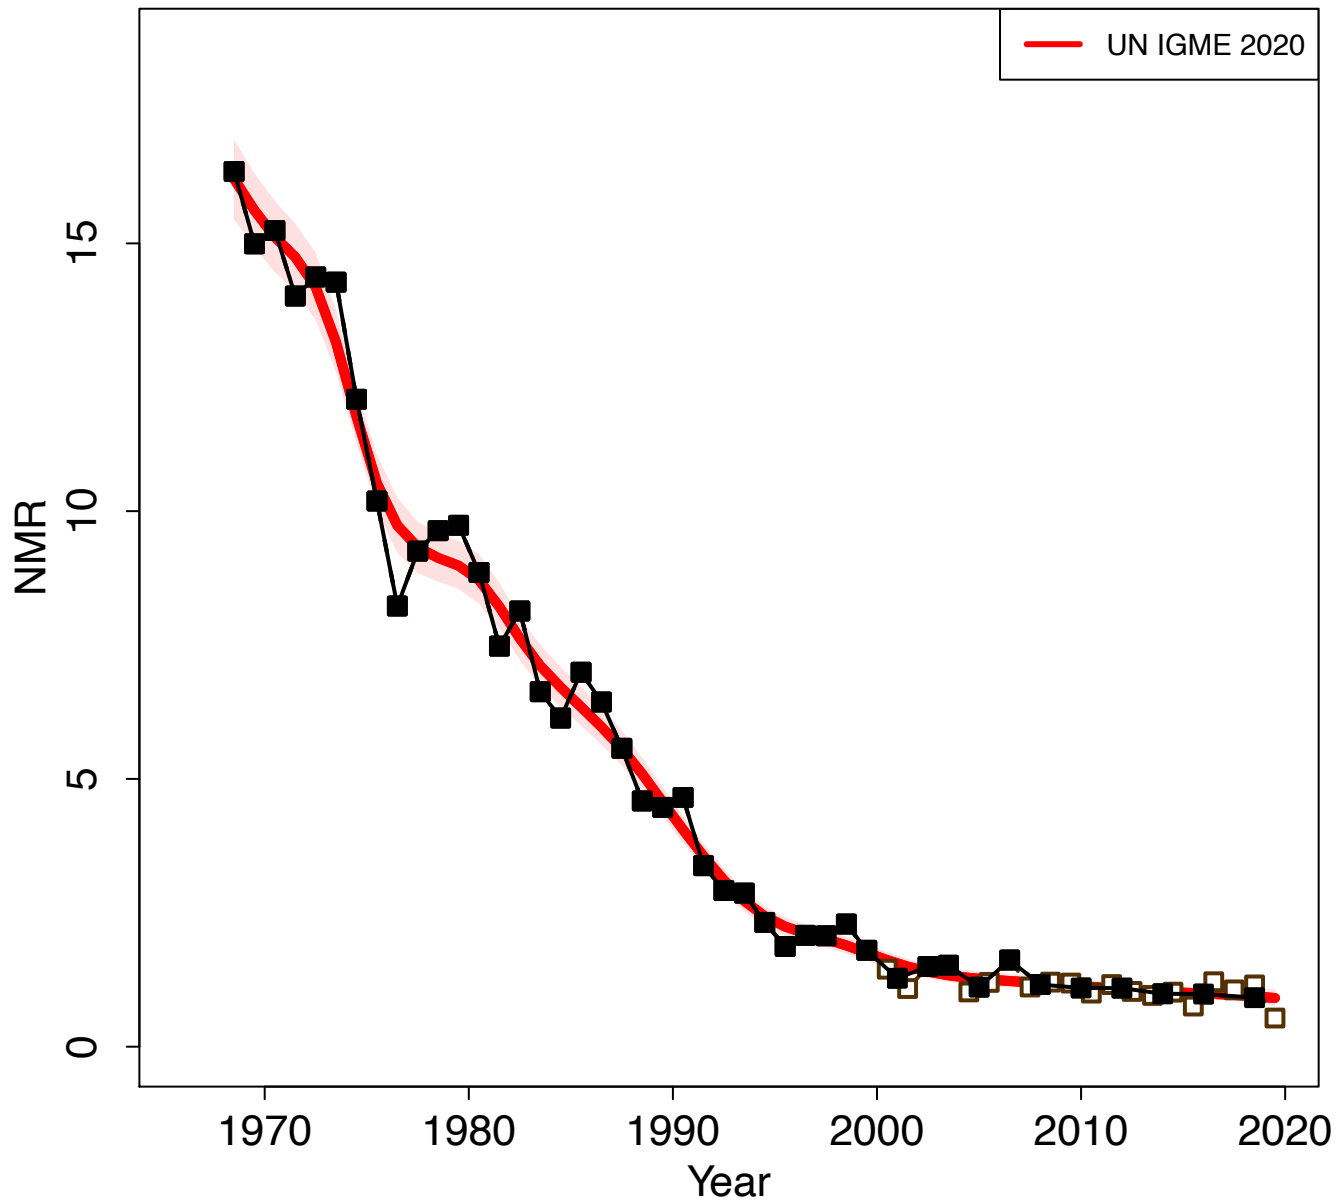

# Zoomed in

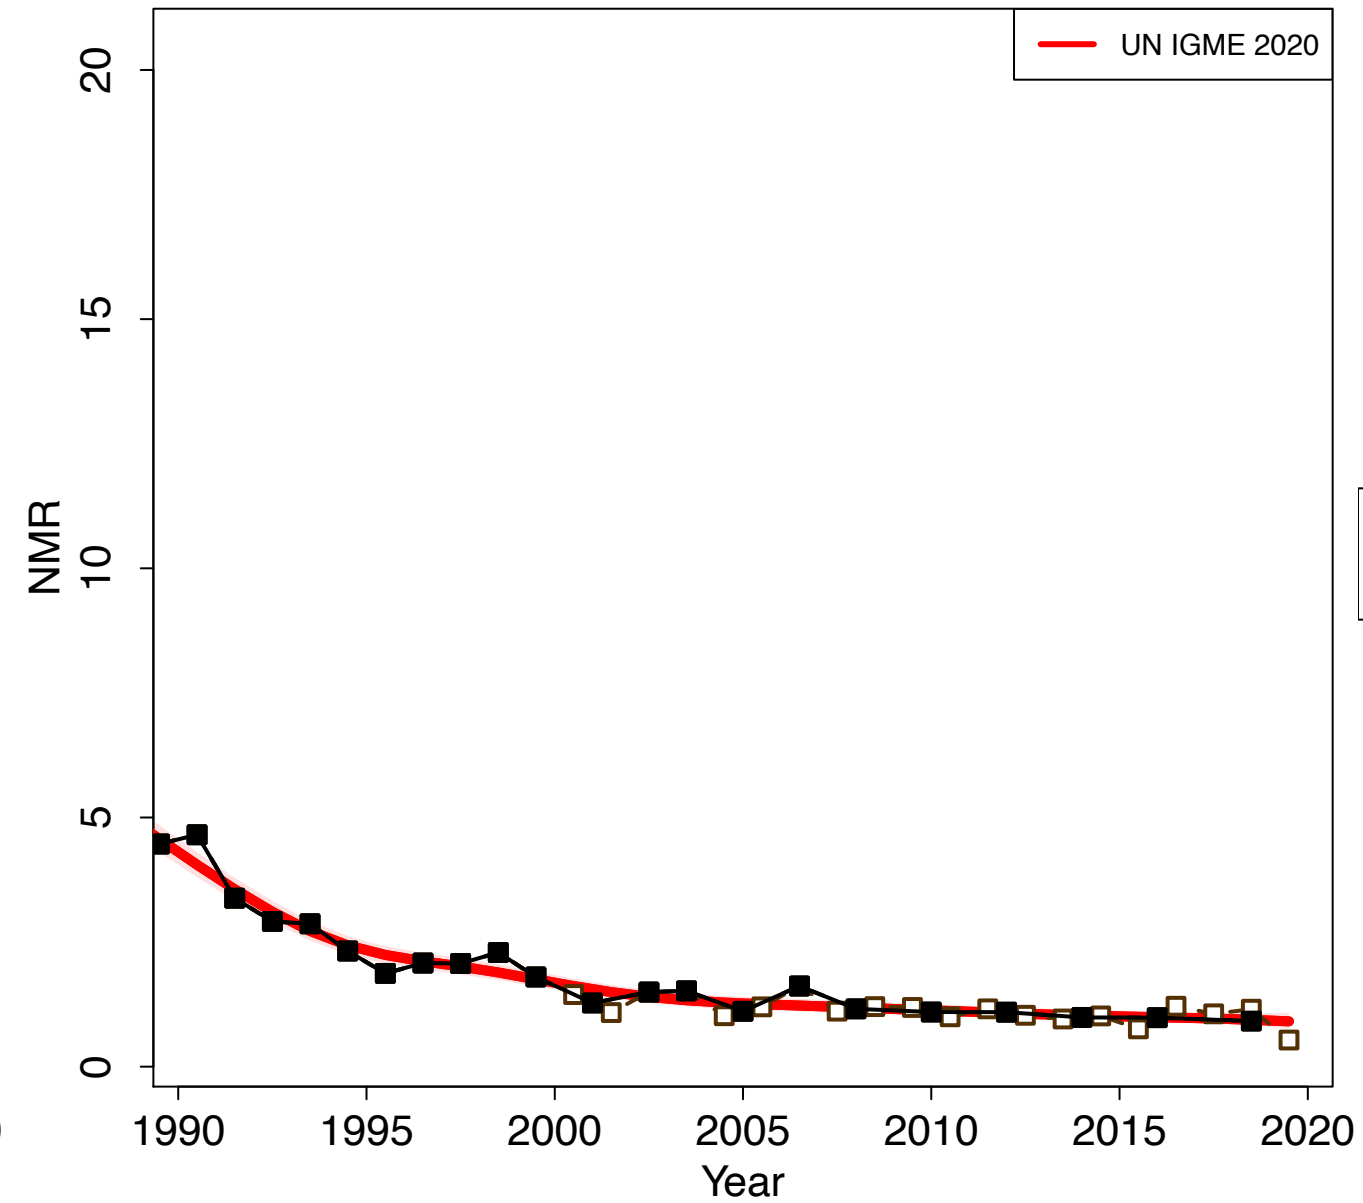



# Slovakia

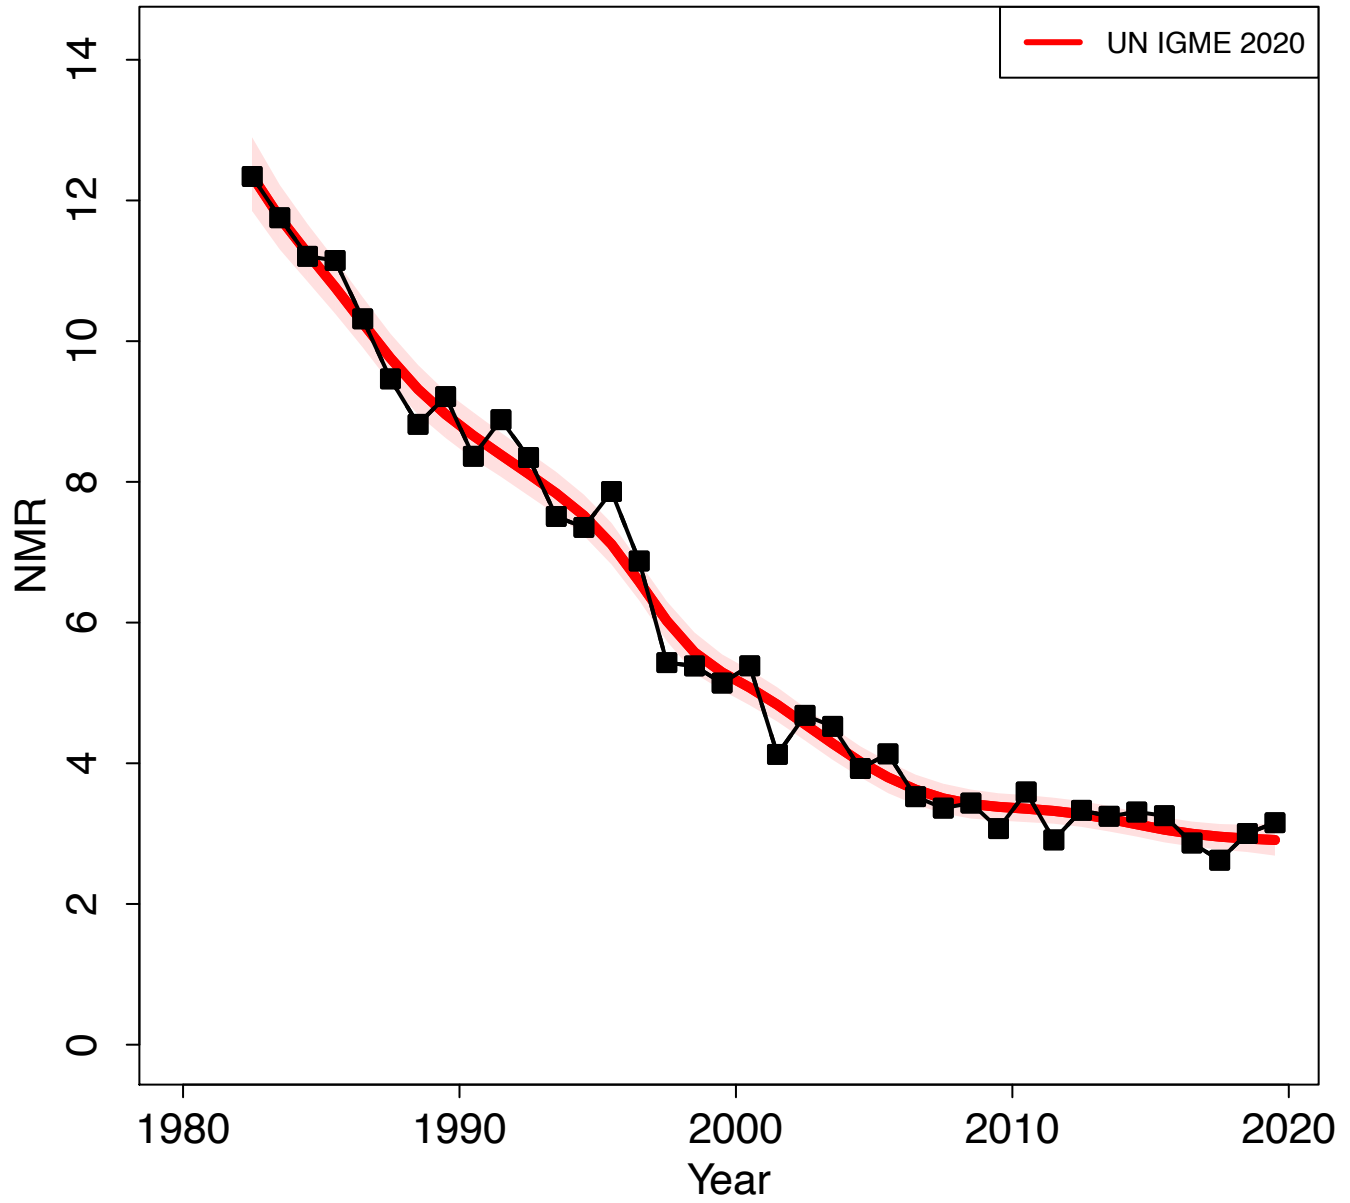

# Zoomed in

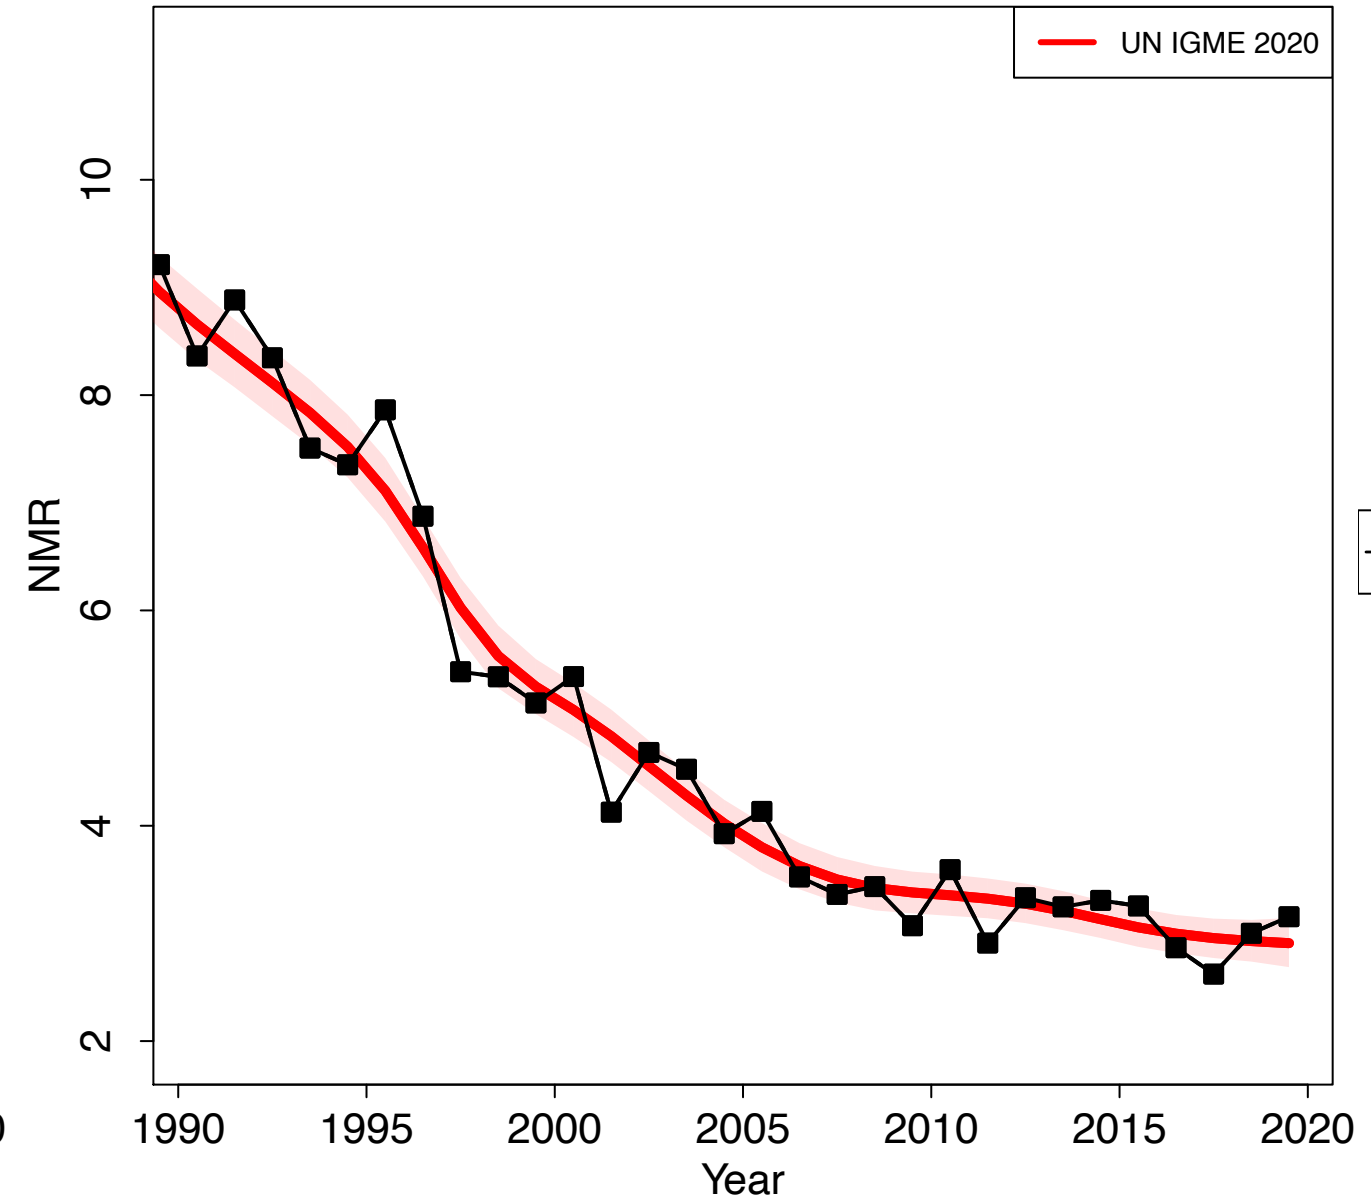

# Slovenia

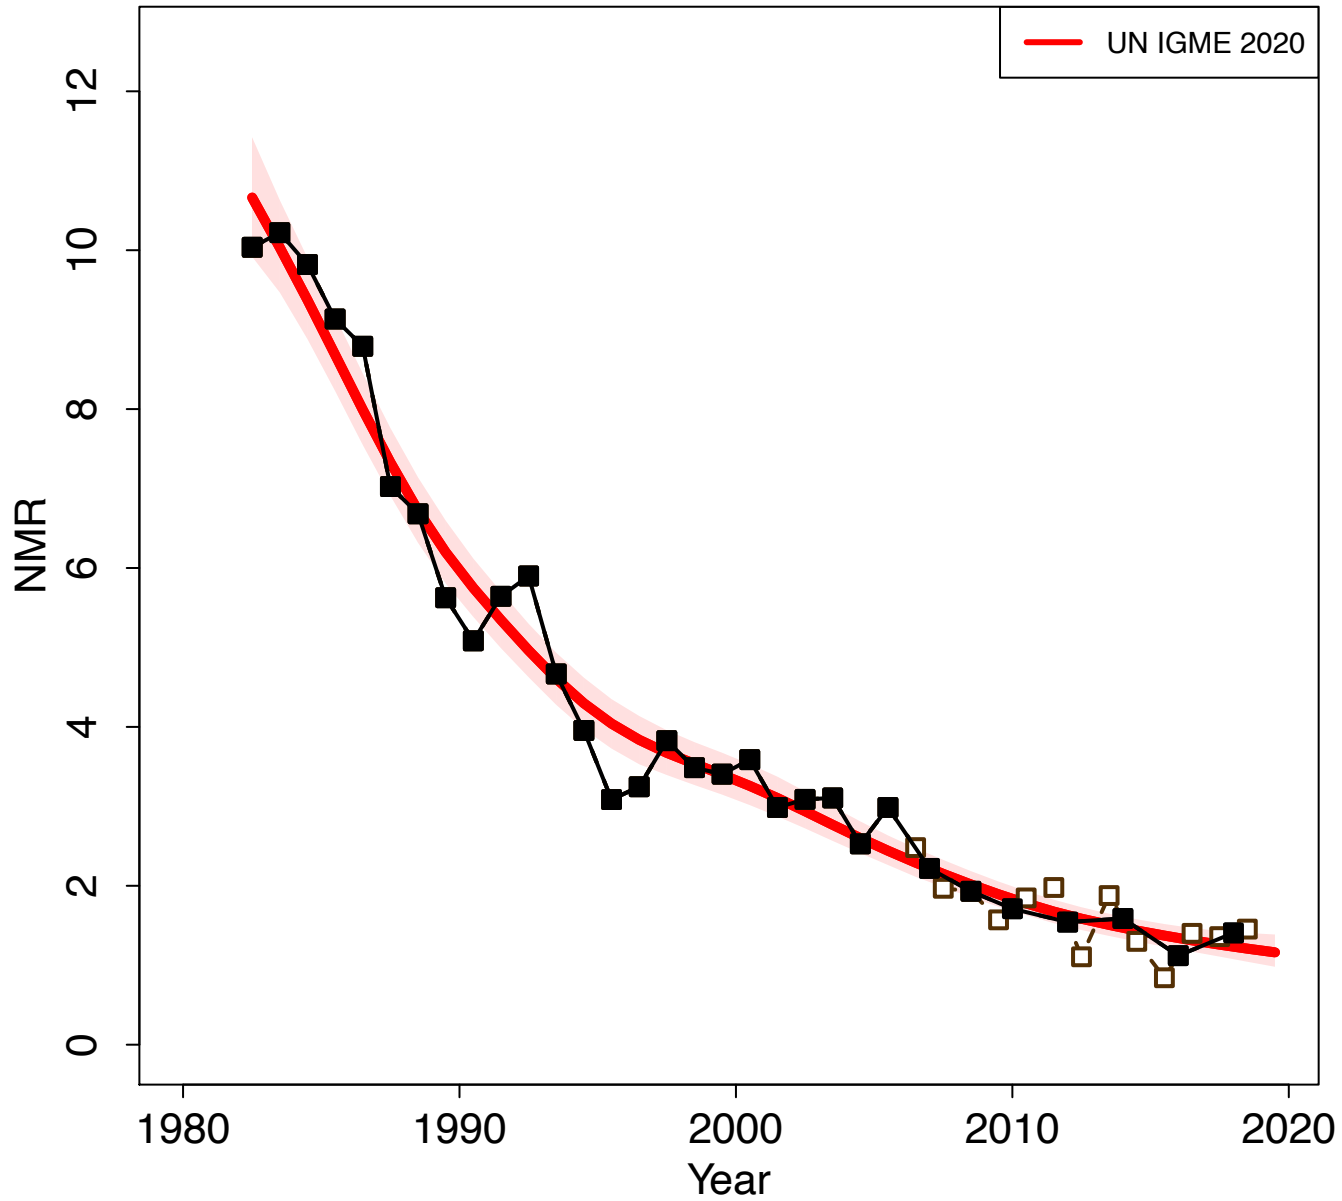

# Zoomed in

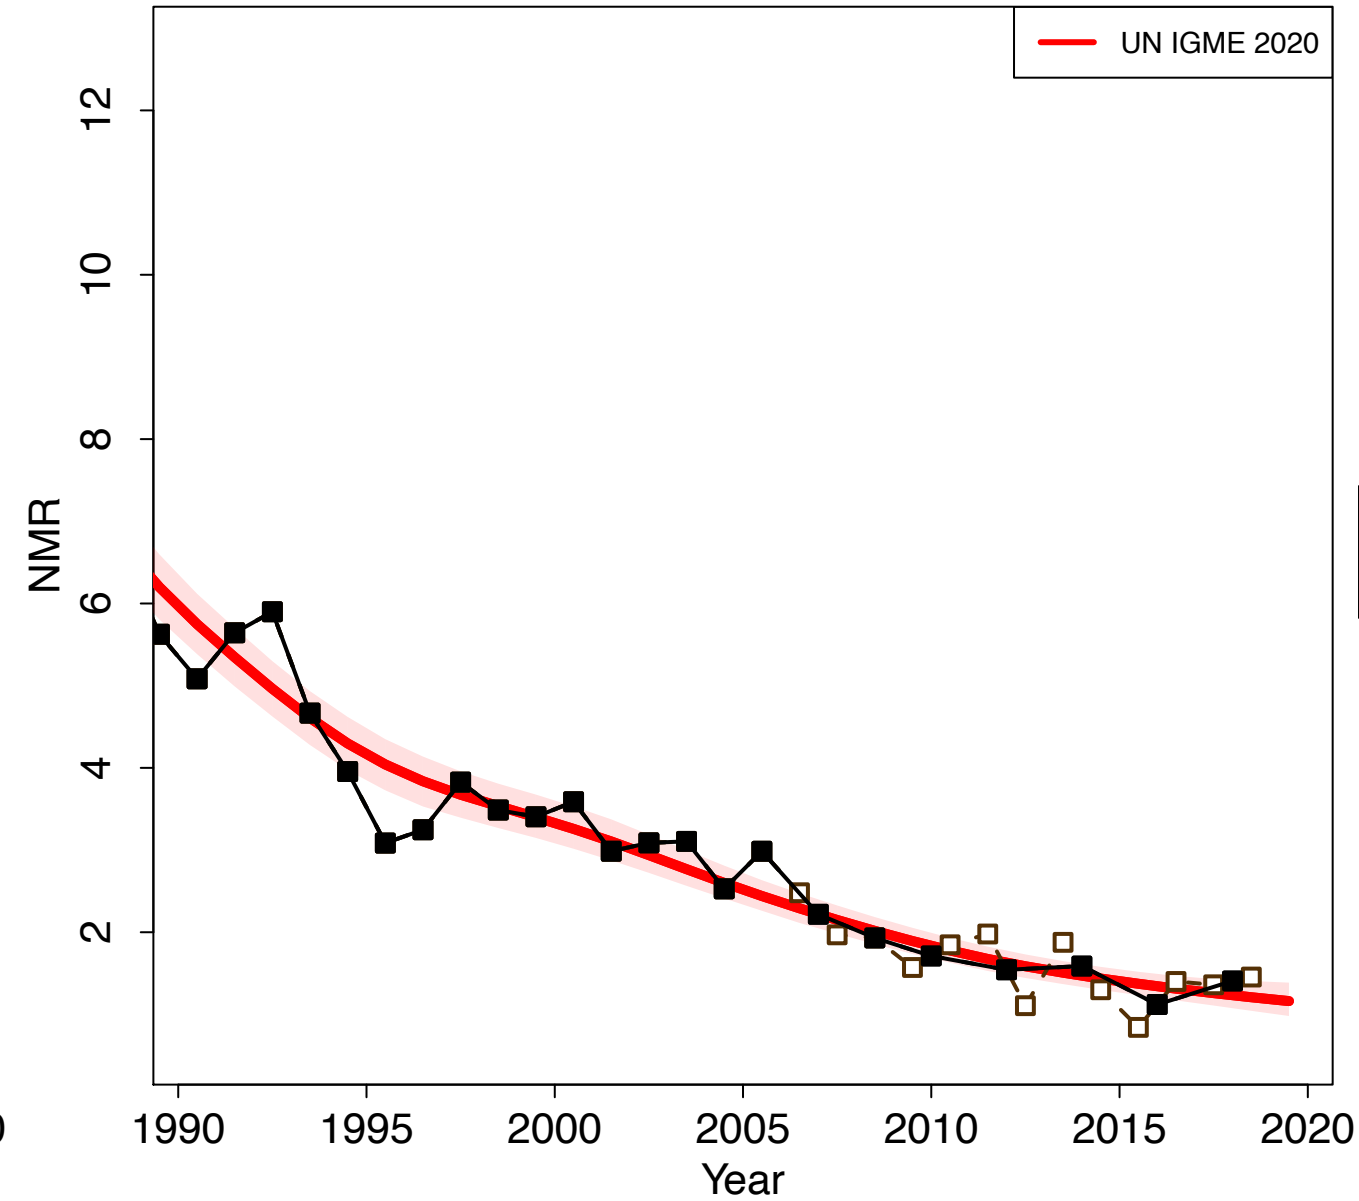

# Solomon Islands

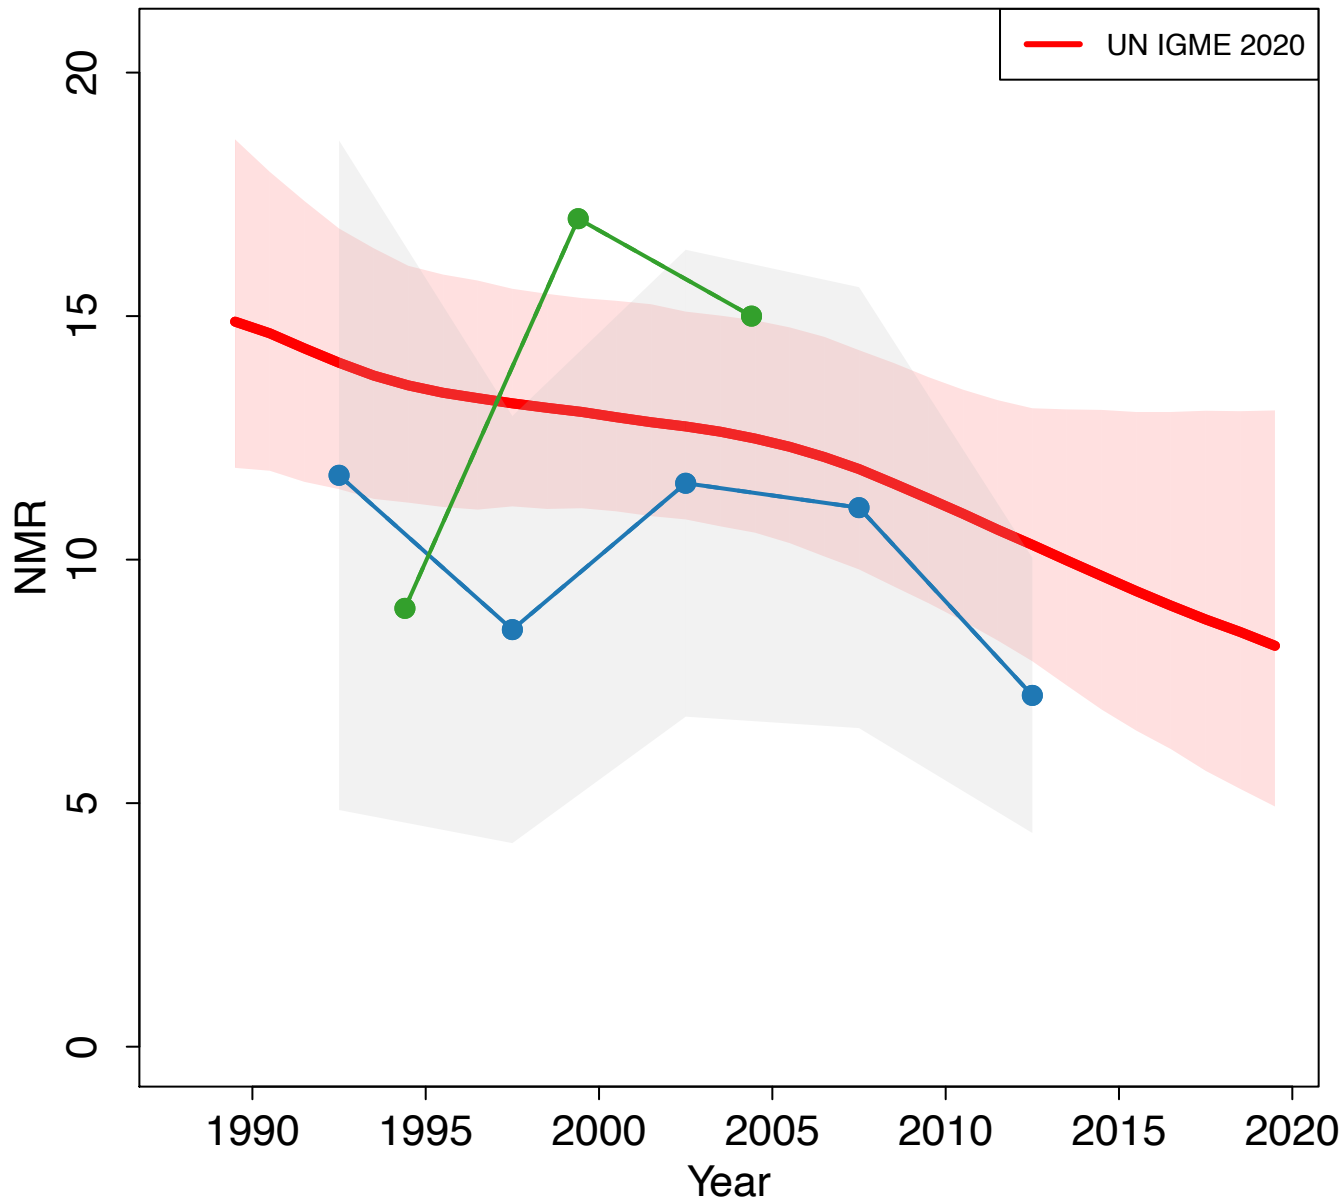

# Zoomed in

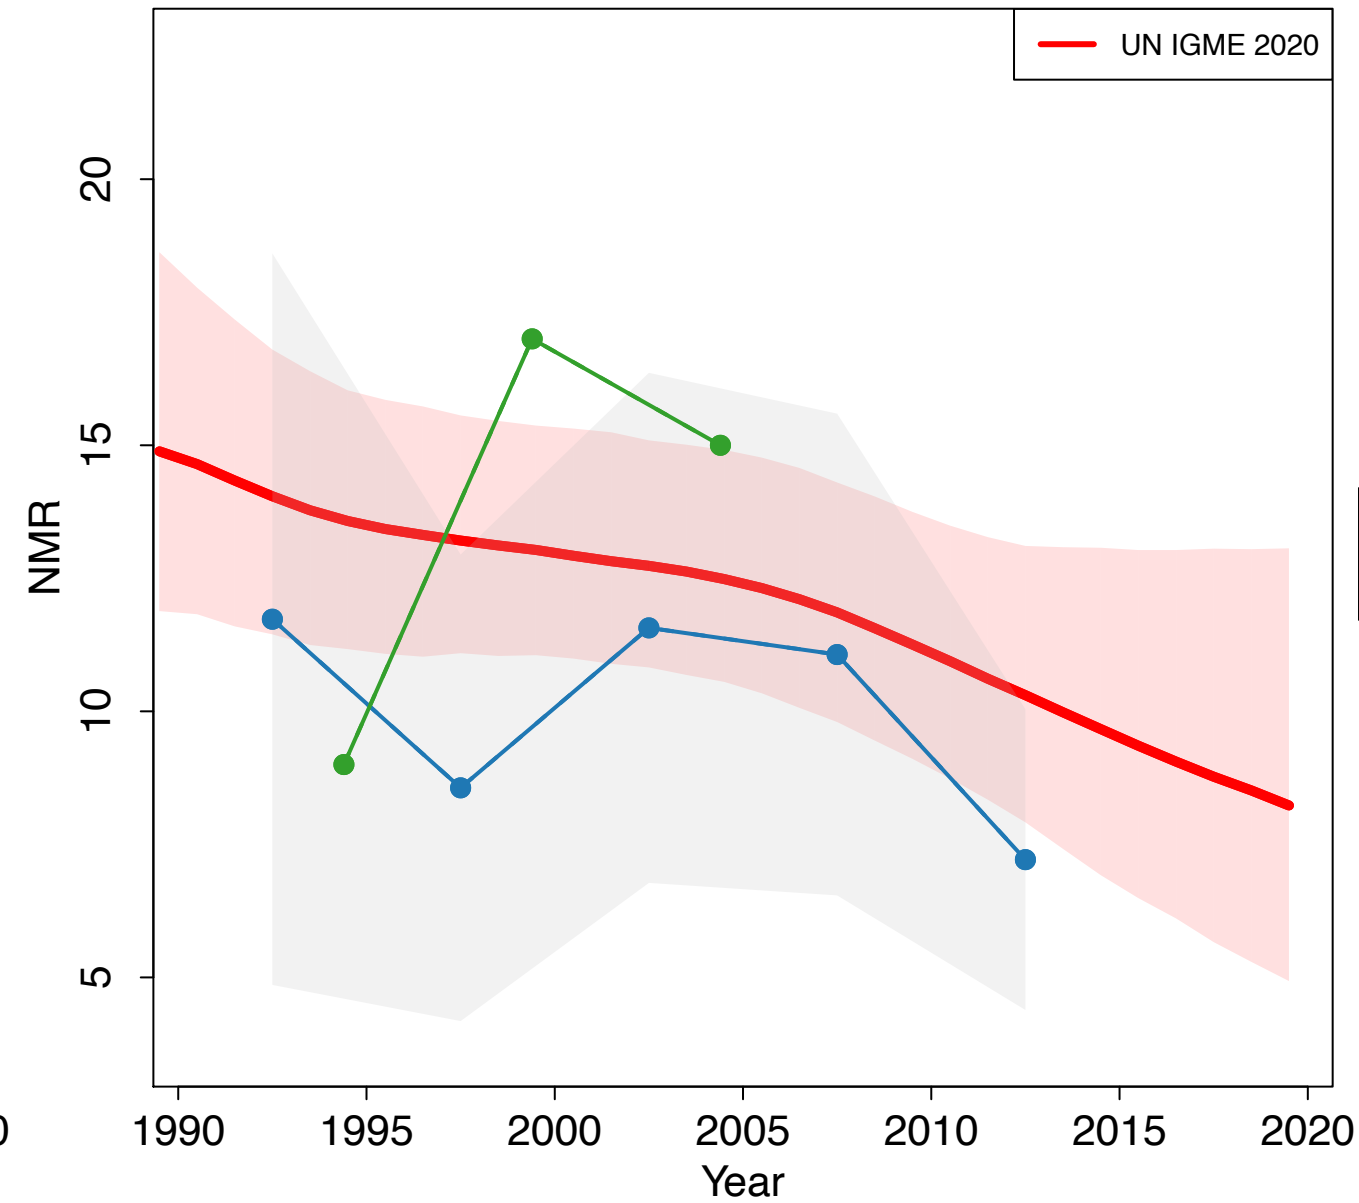

# Somalia

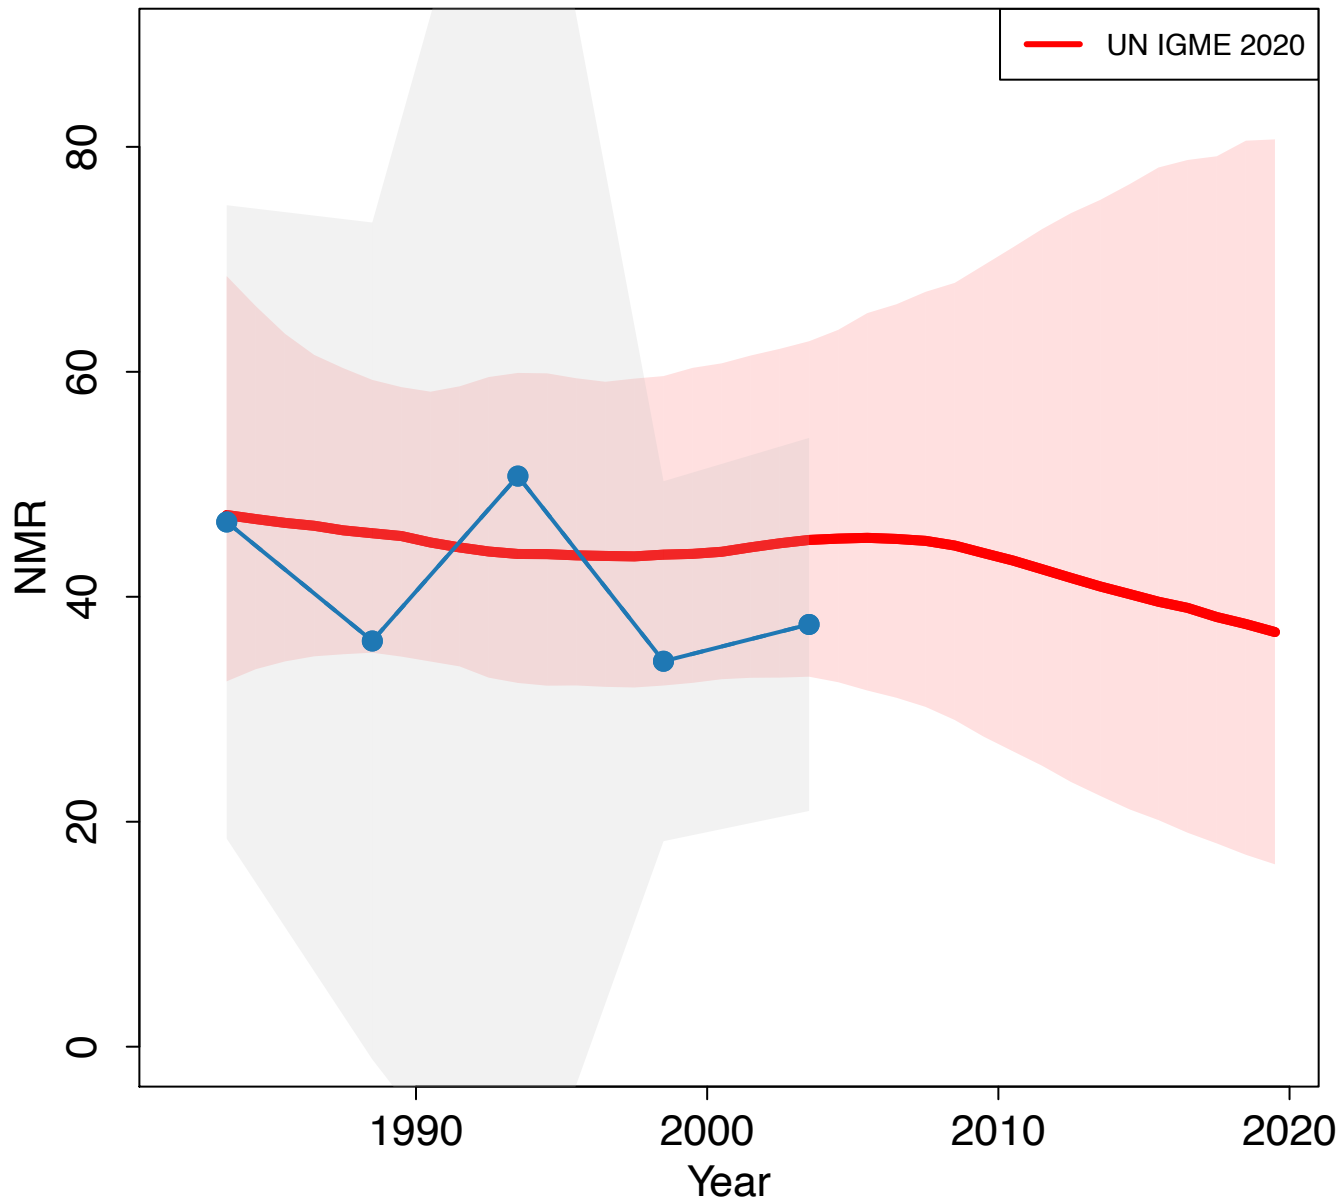

# Zoomed in

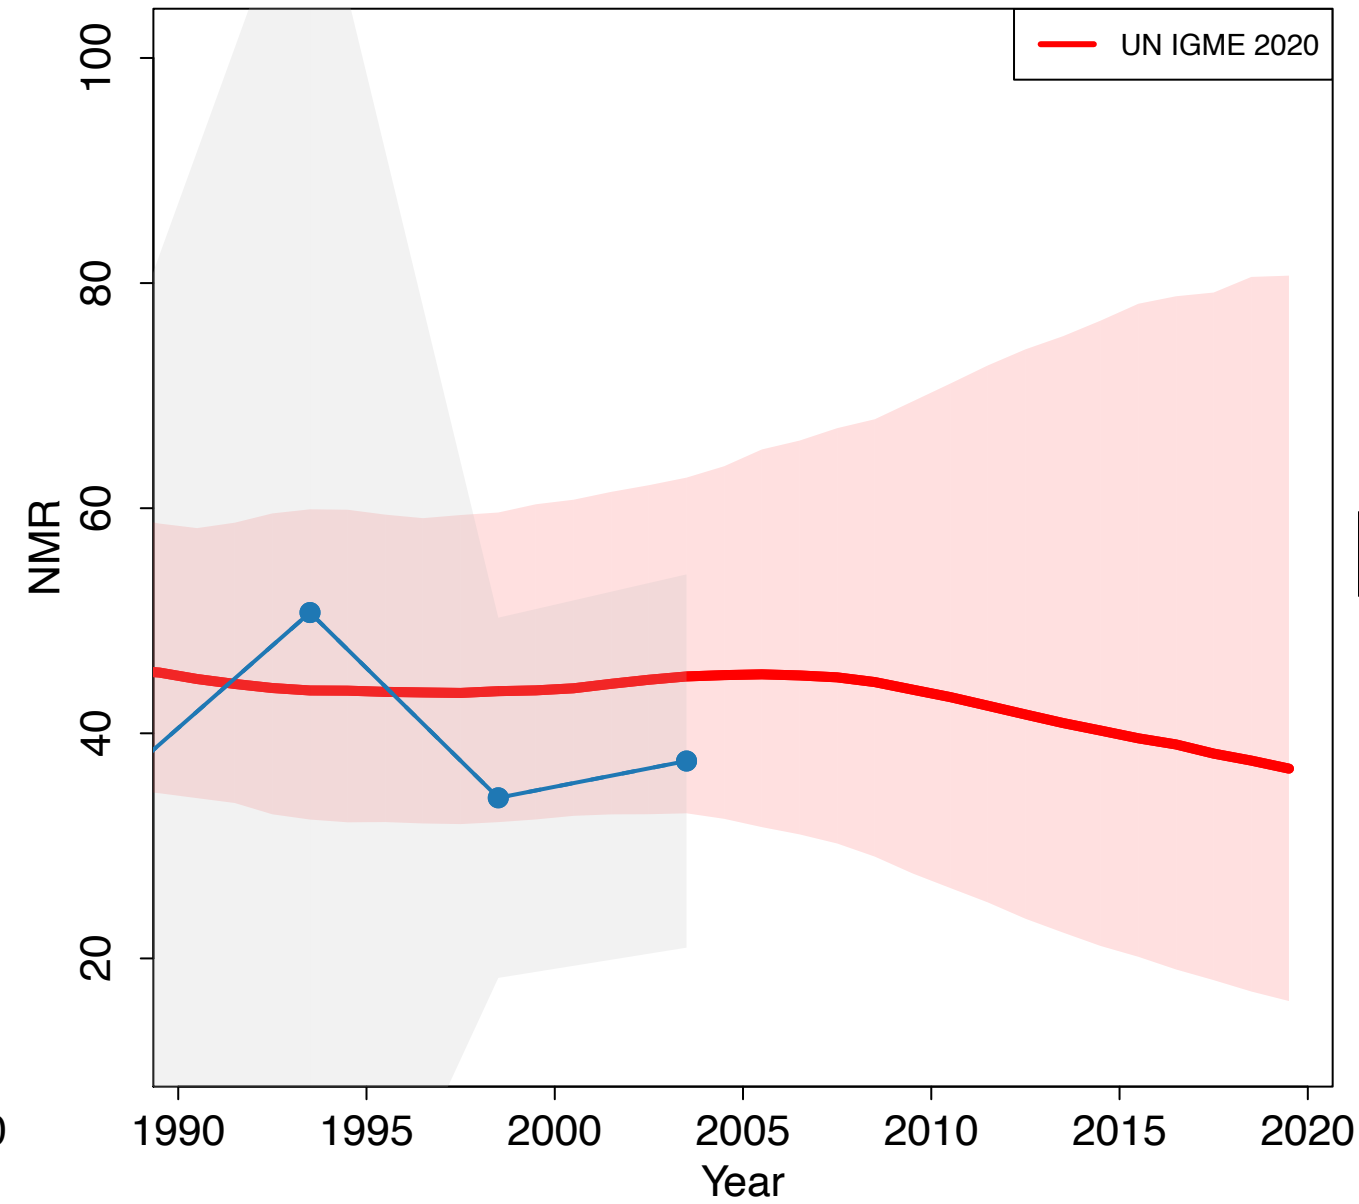

# South Africa

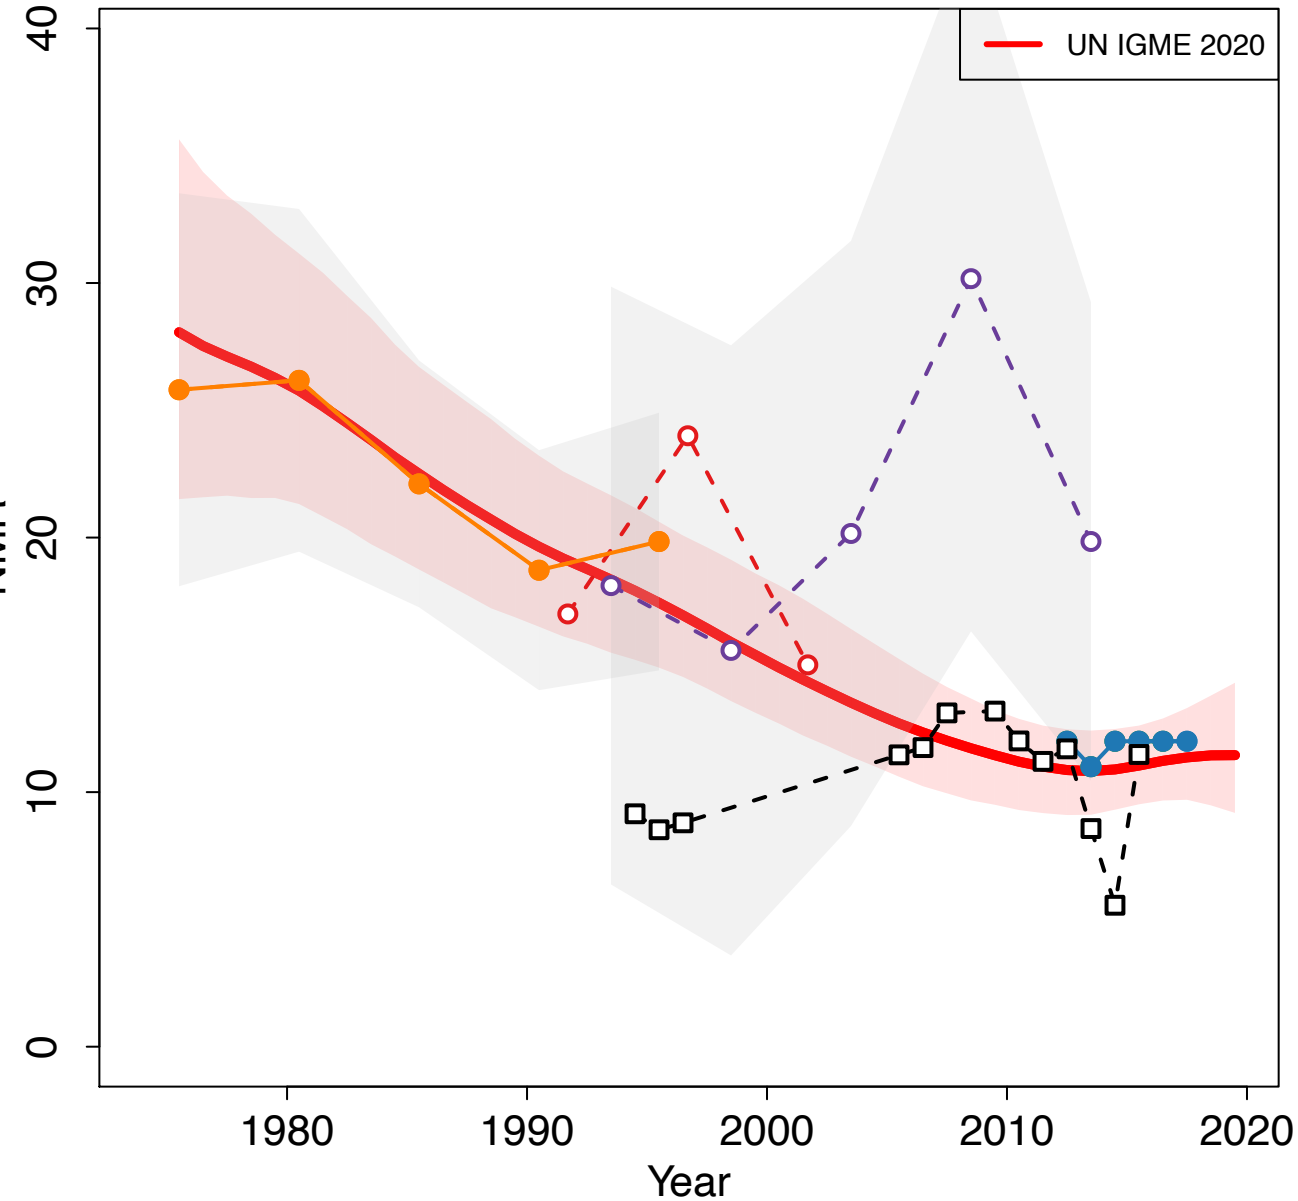

# Zoomed in

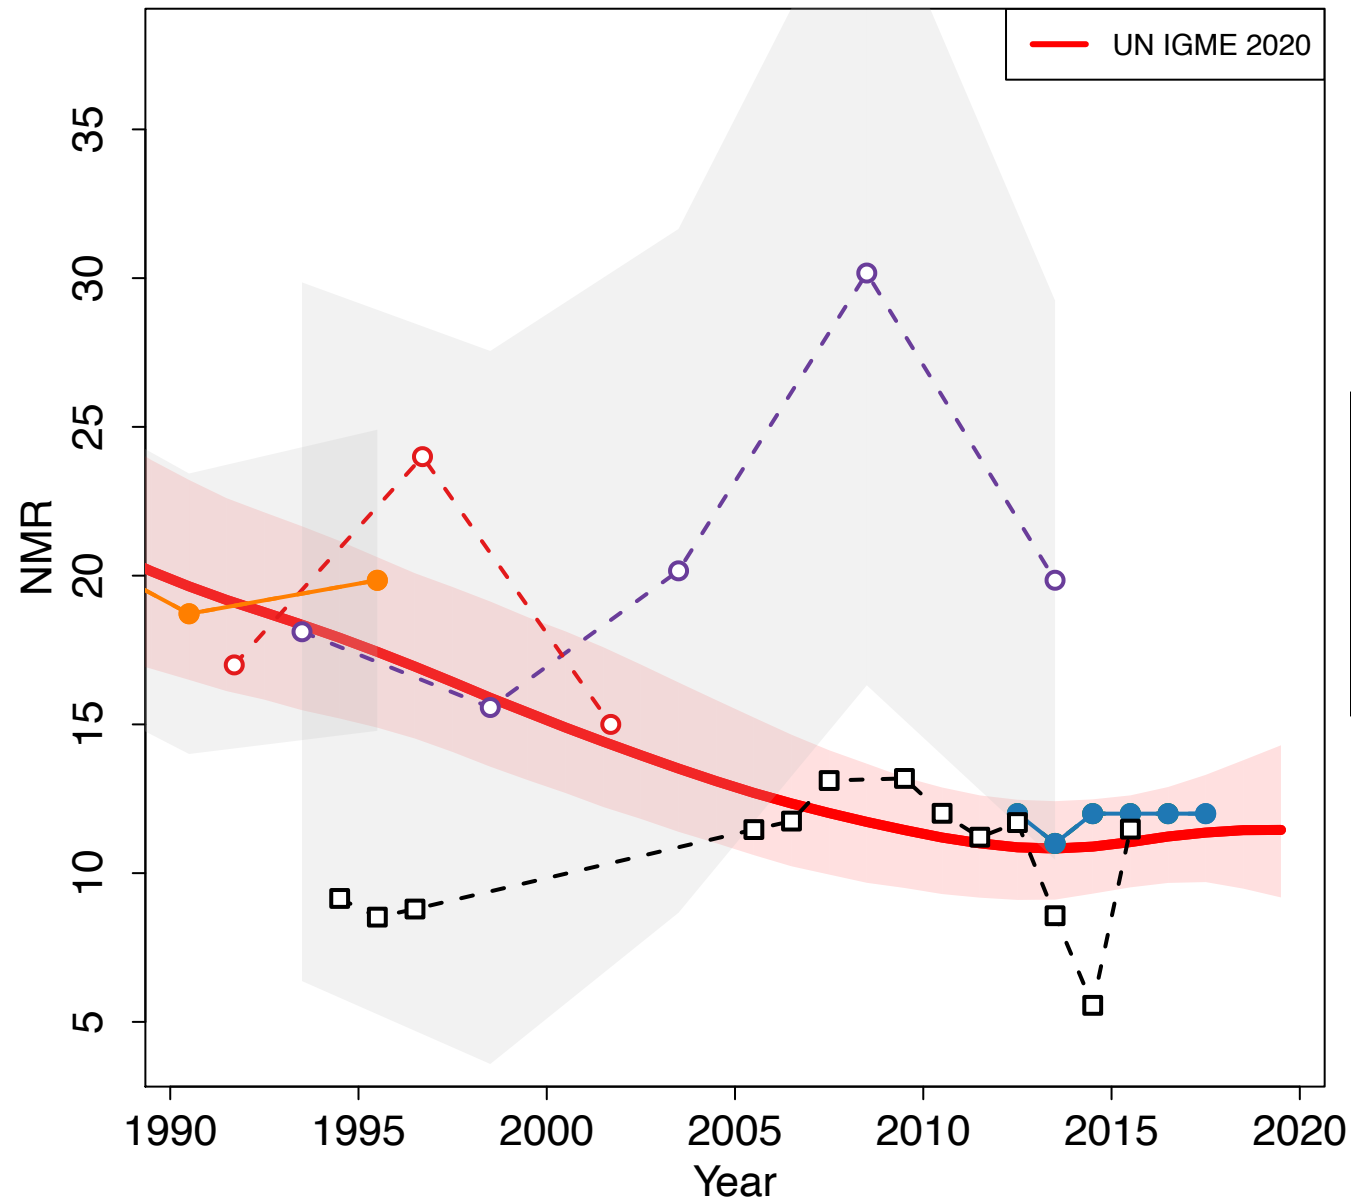

- Demographic and Health Survey 1998 (DHS)
- Demographic and Health Survey 2004 (DHS)
- Demographic and Health Survey 2016 (DHS)
- Data from District Health Information System 2016 (Others)
- Data from District Health Information System 2017 (Others)
- VR WHO

# South Sudan

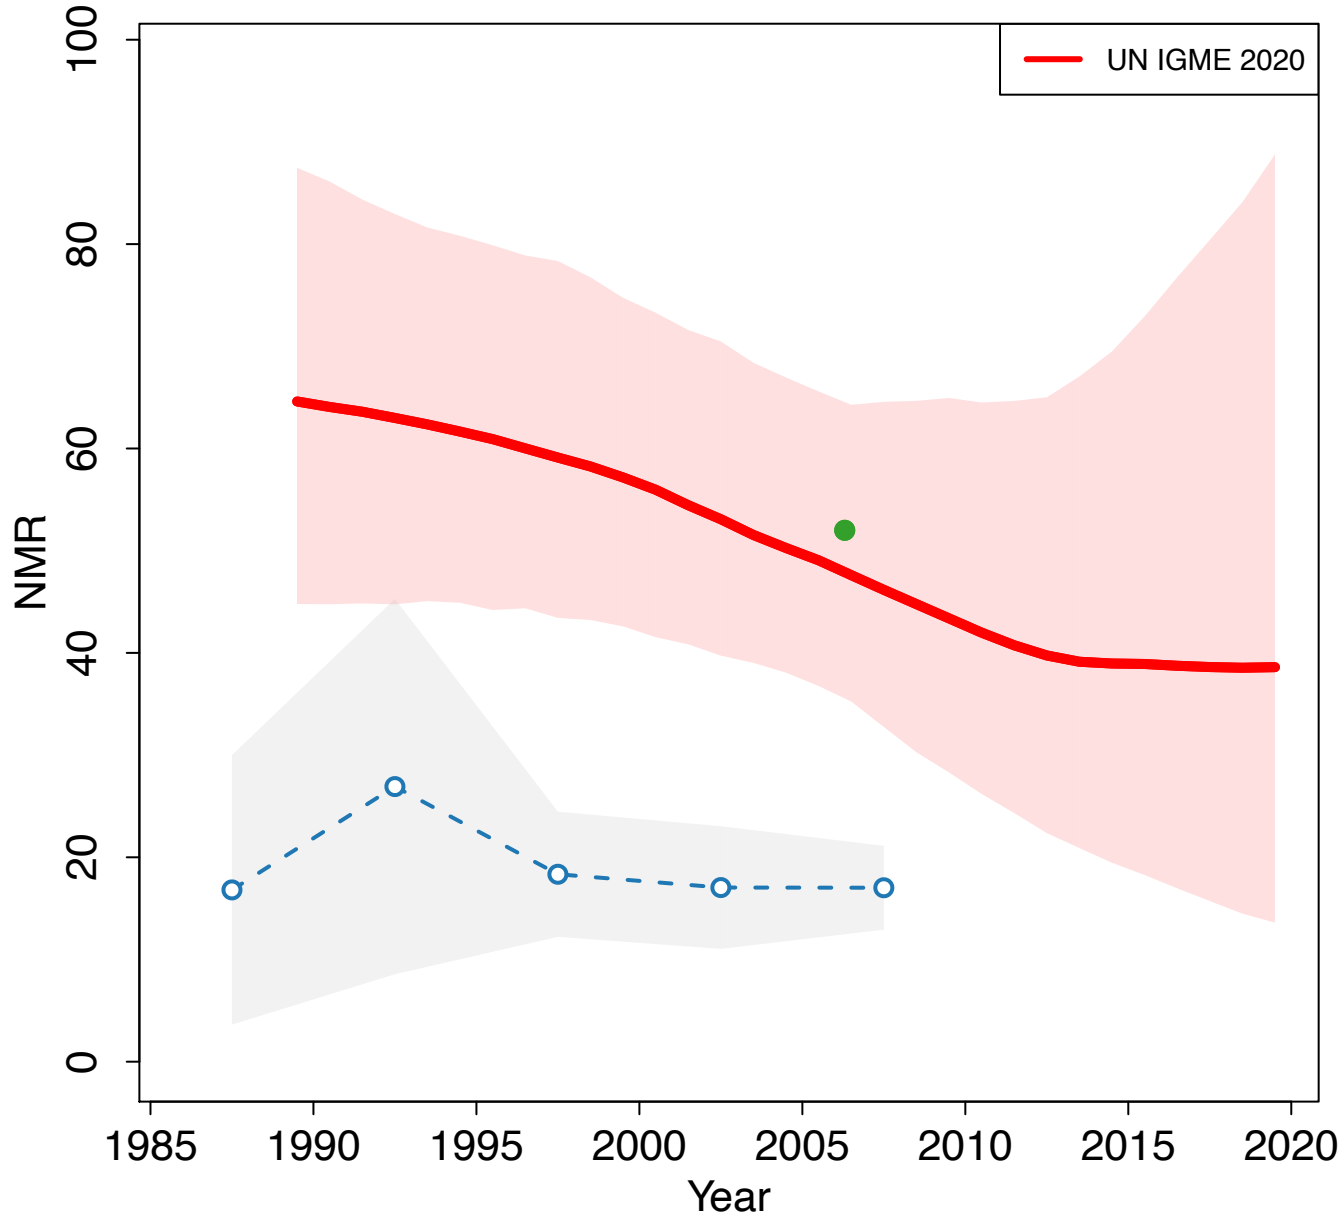

# Zoomed in

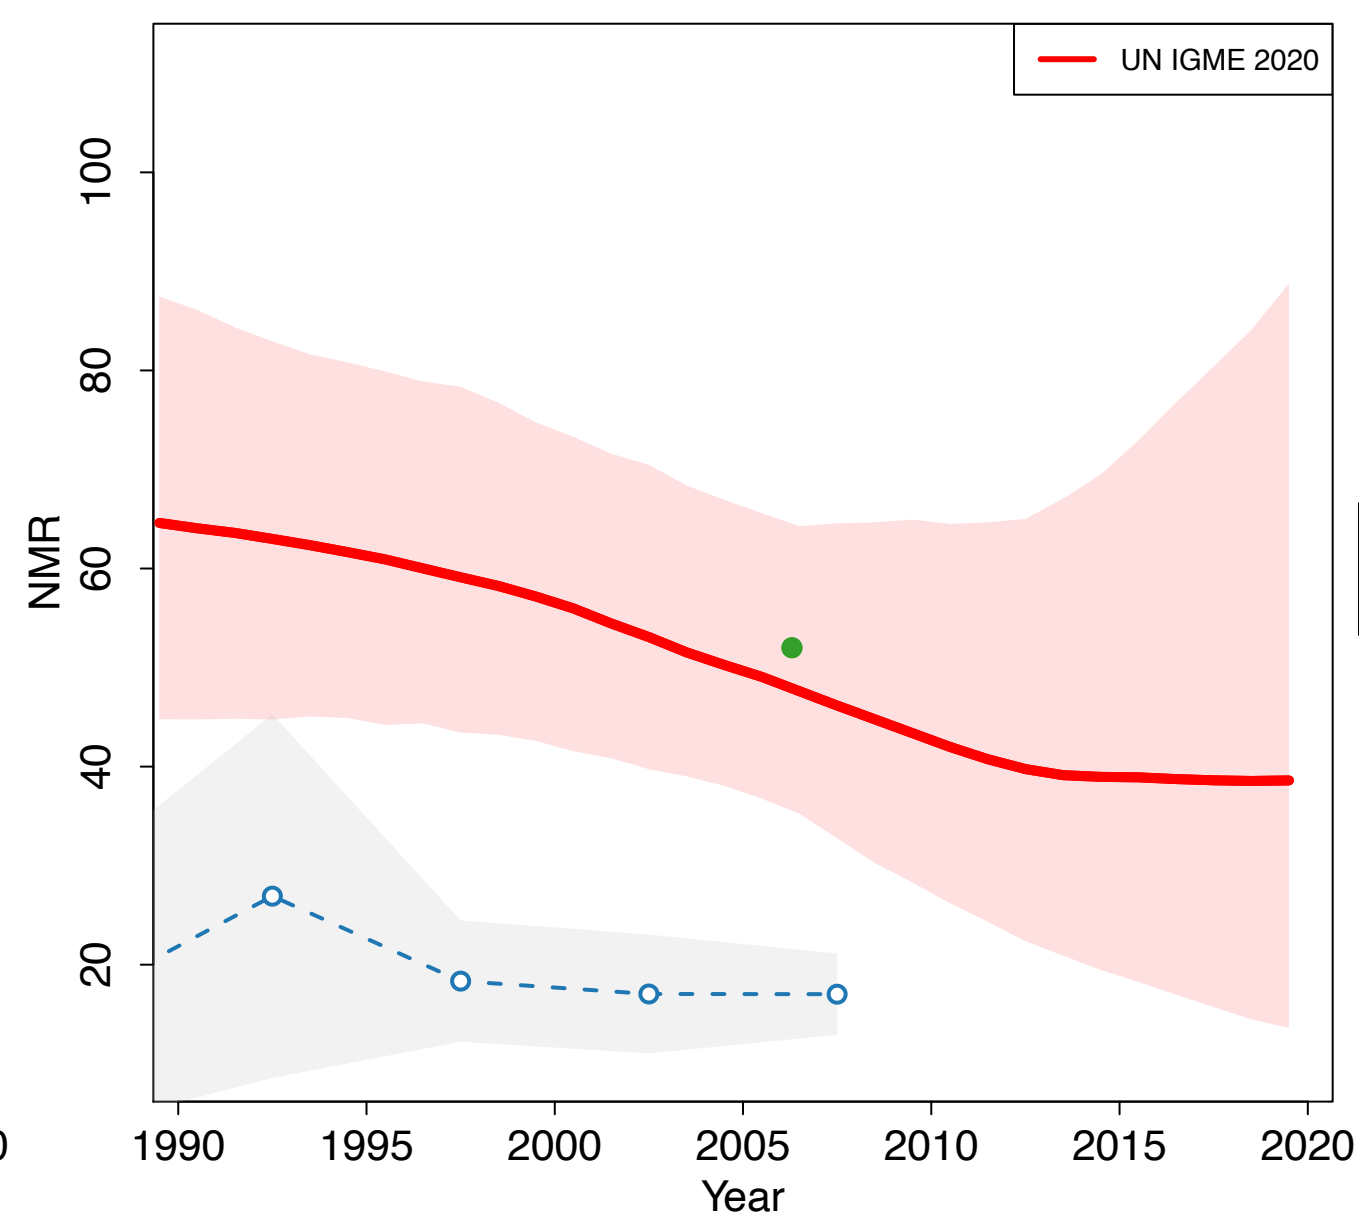

# Spain

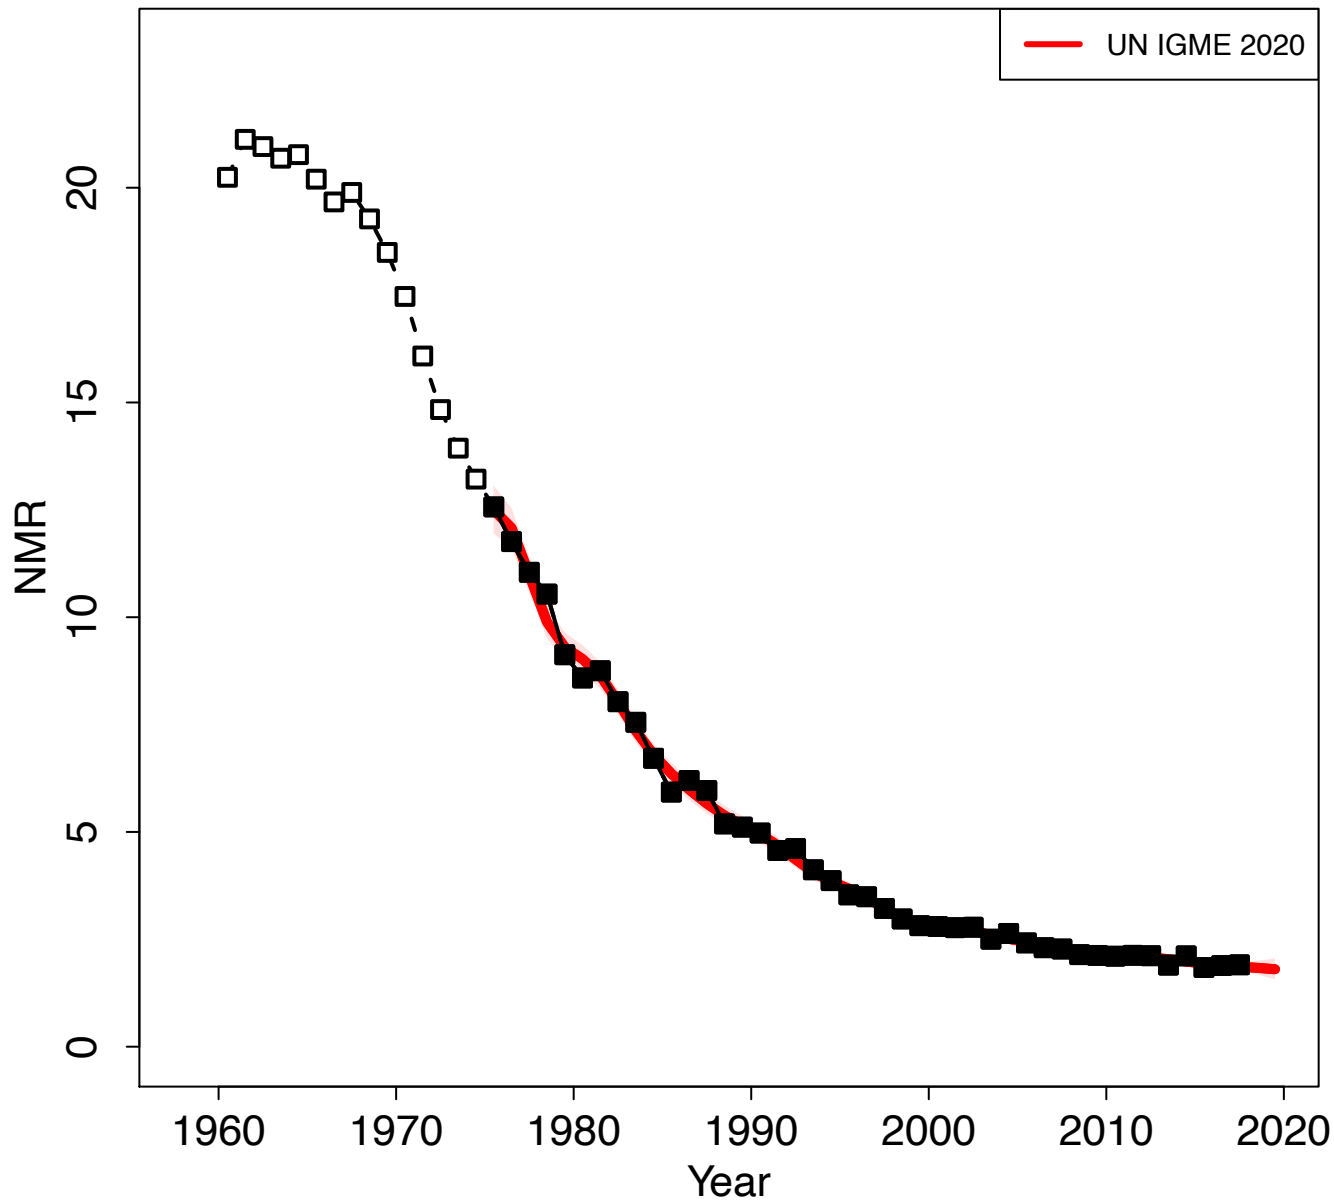

# Zoomed in

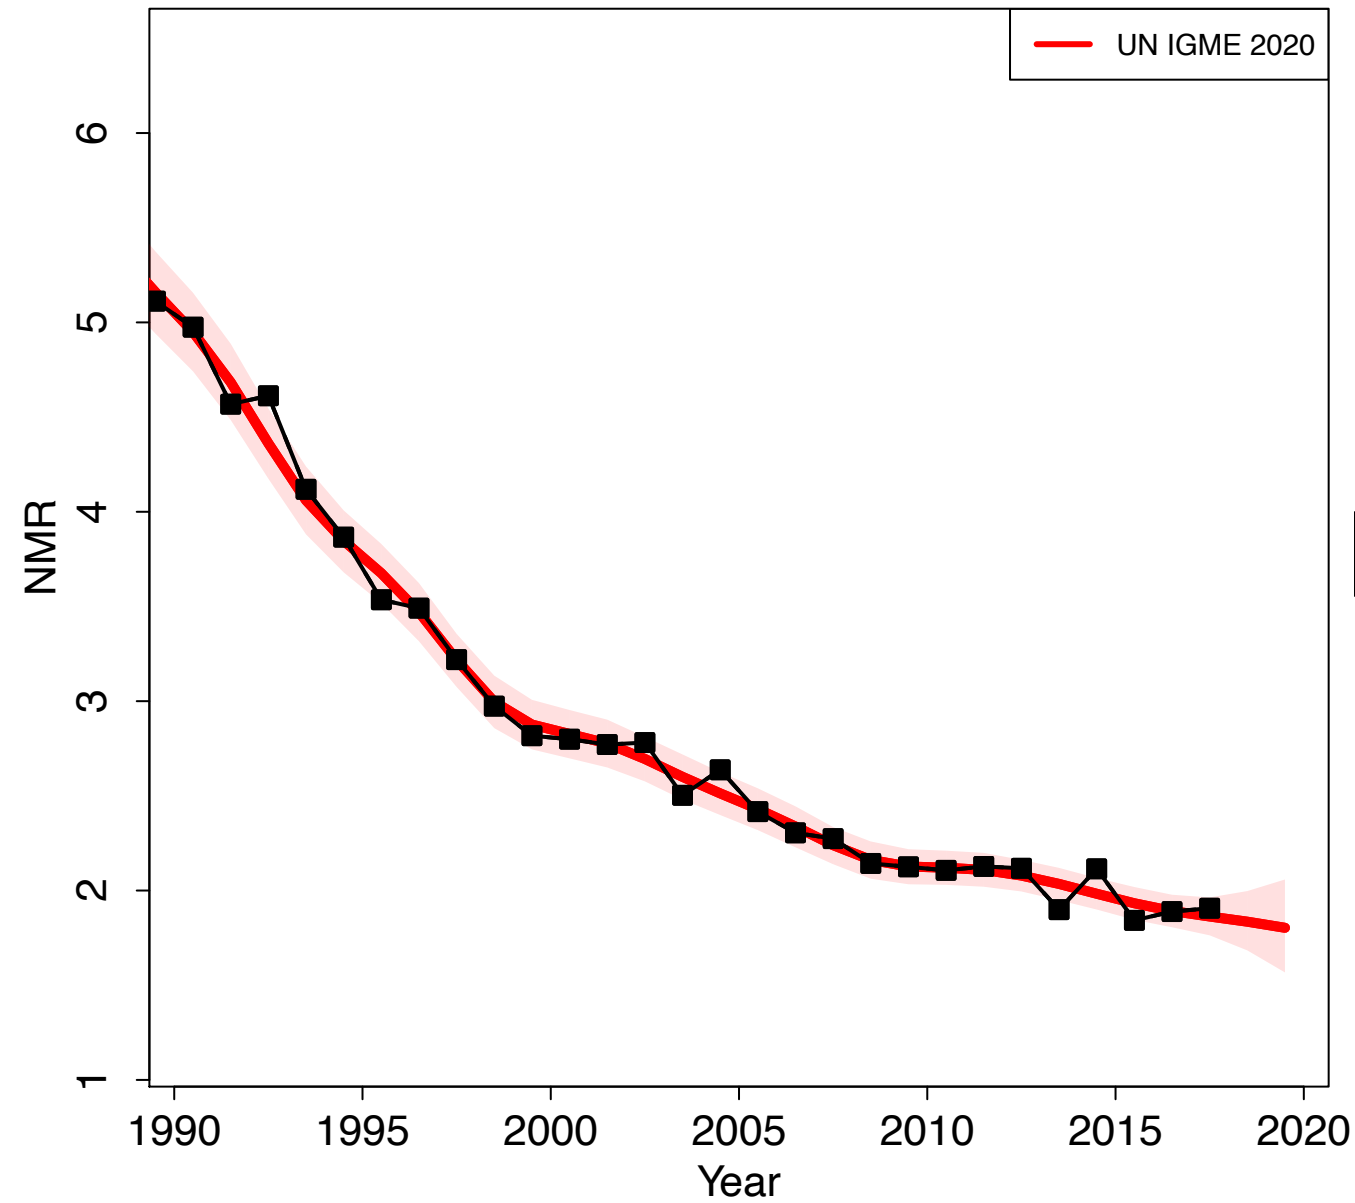

# Sri Lanka

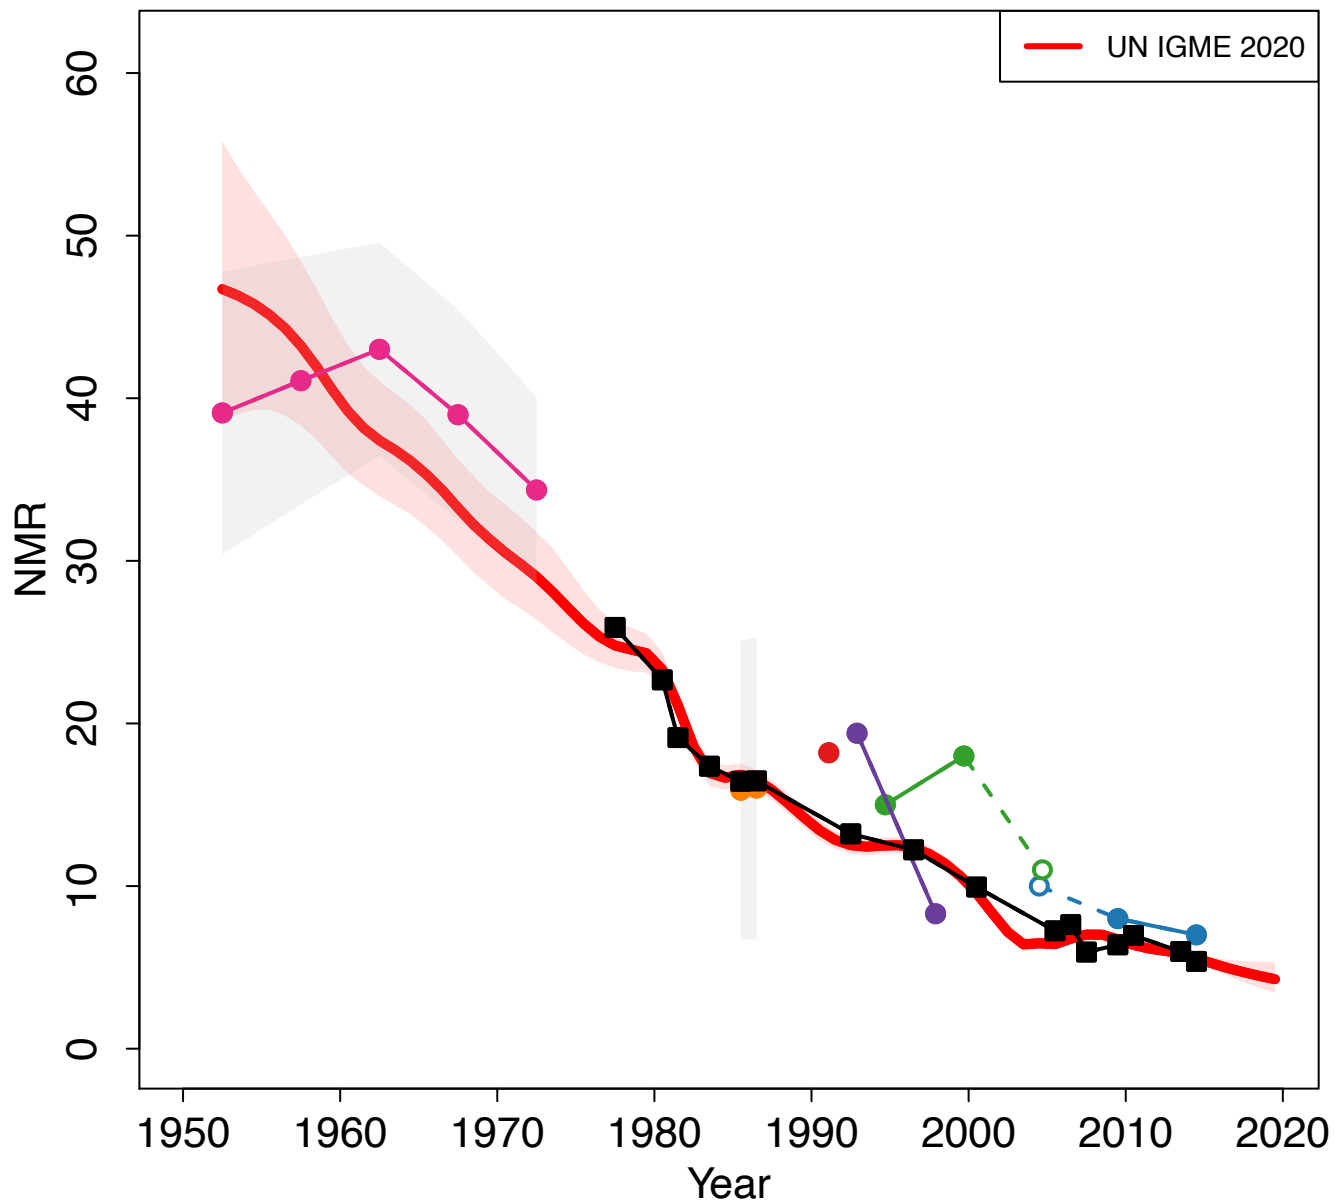

# Zoomed in

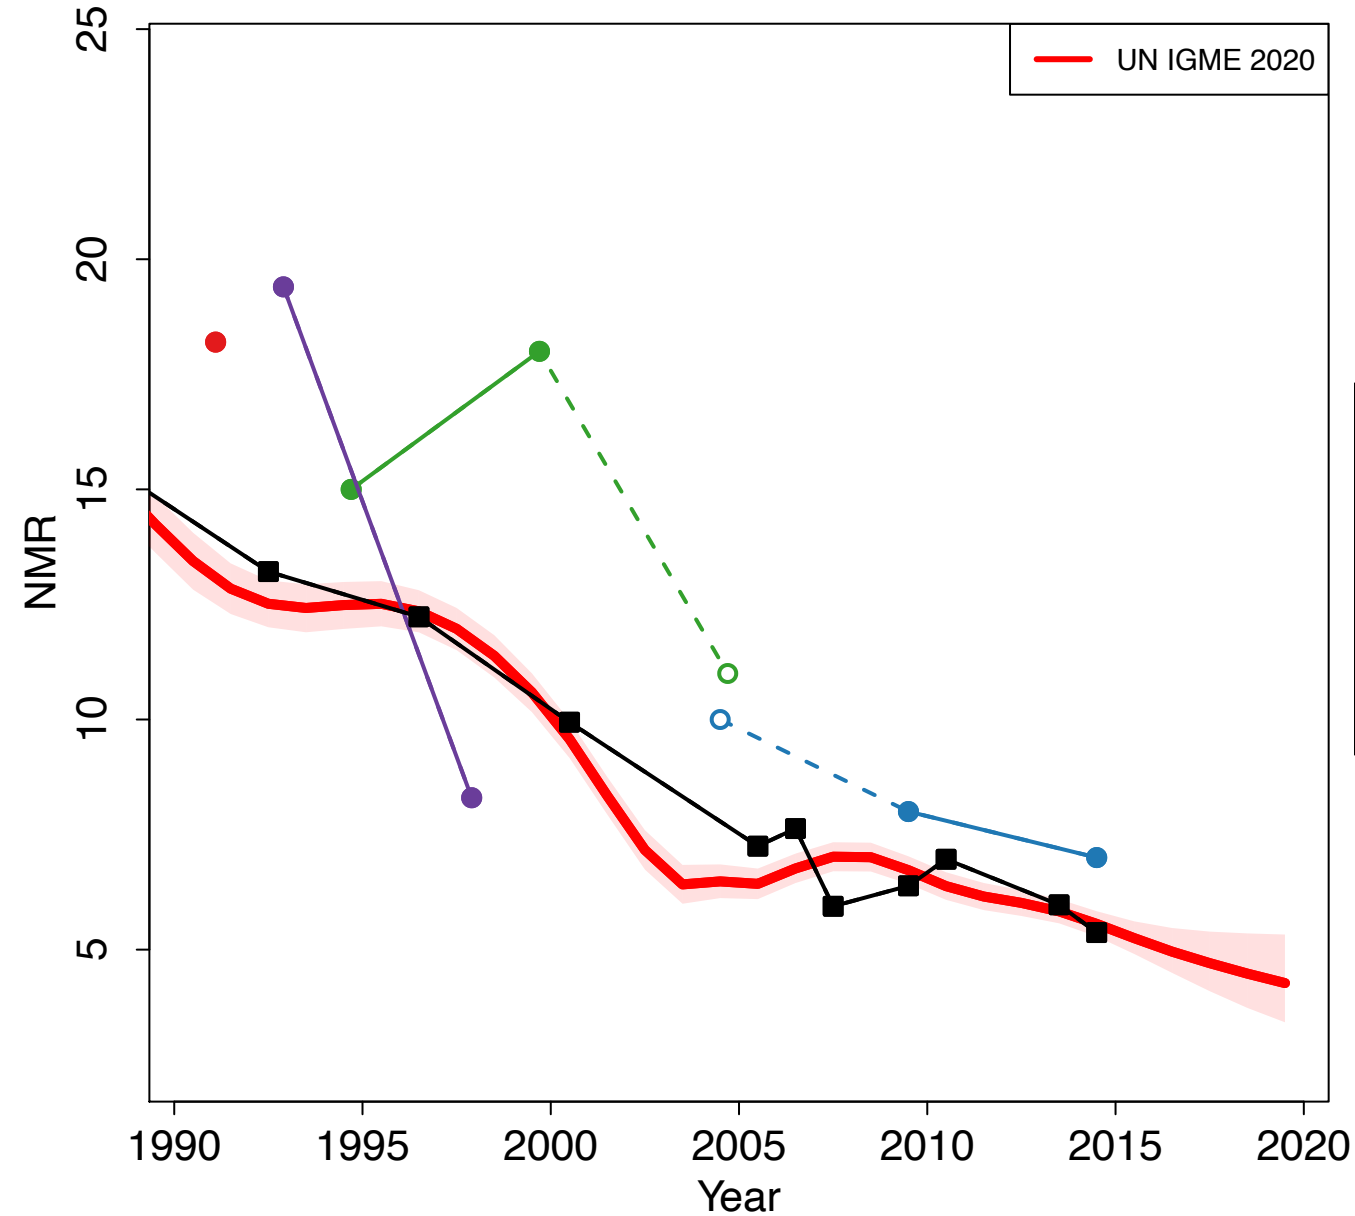



# Saint Vincent and the Grenadines

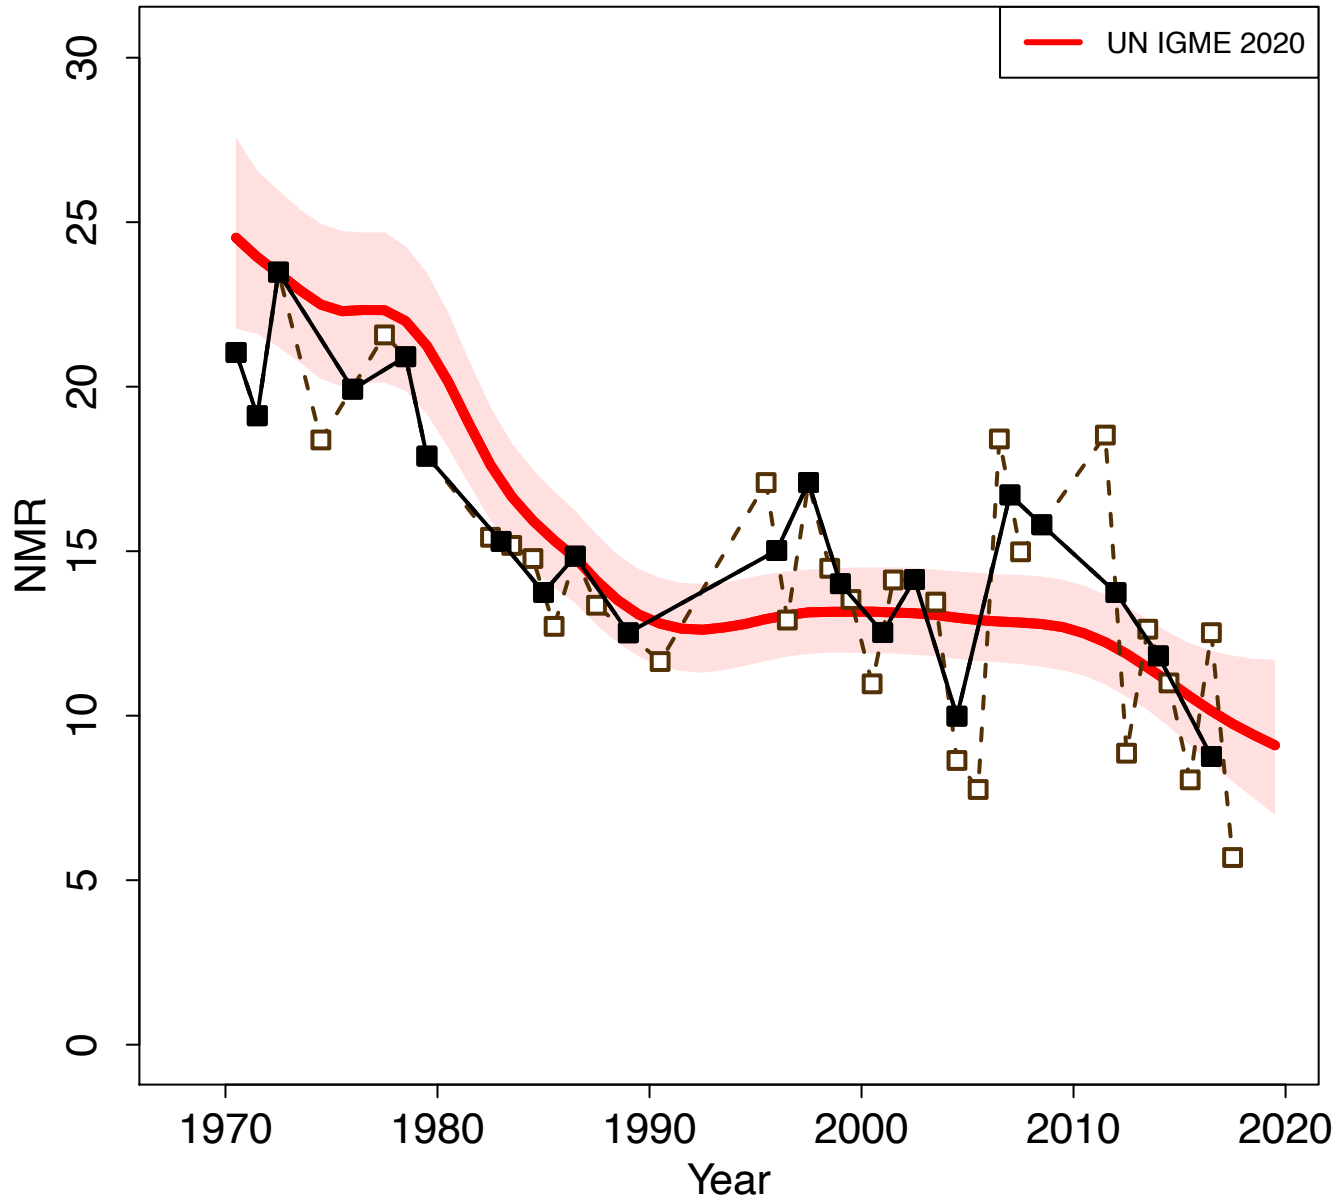

# Zoomed in

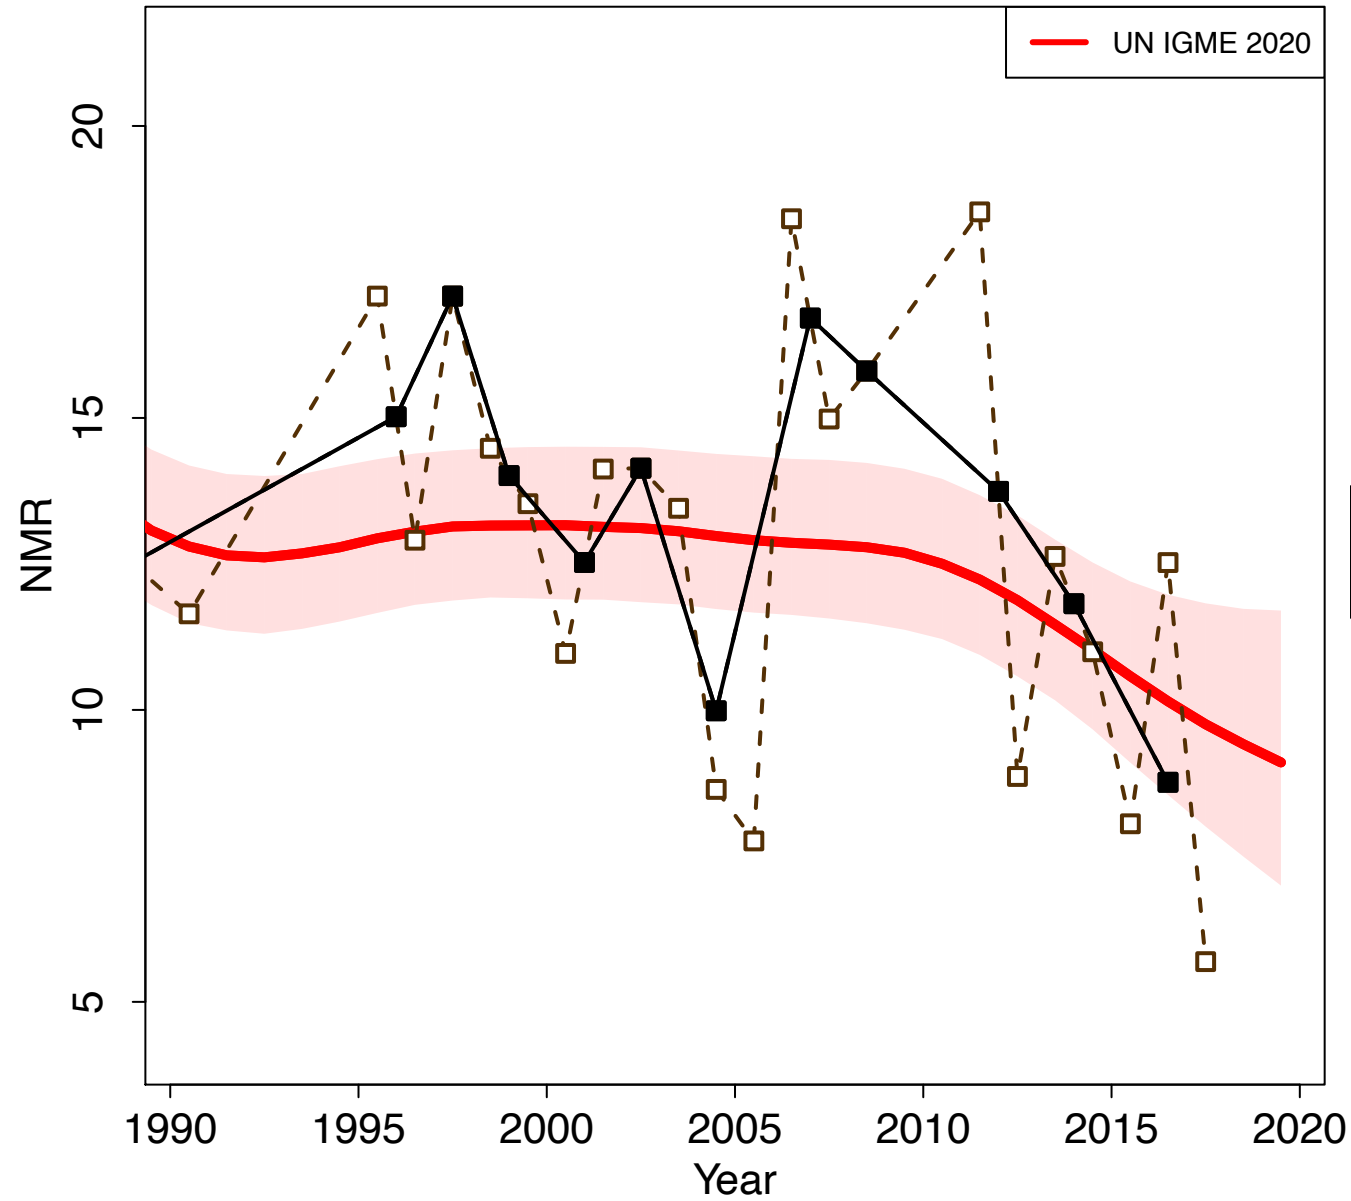

# State of Palestine

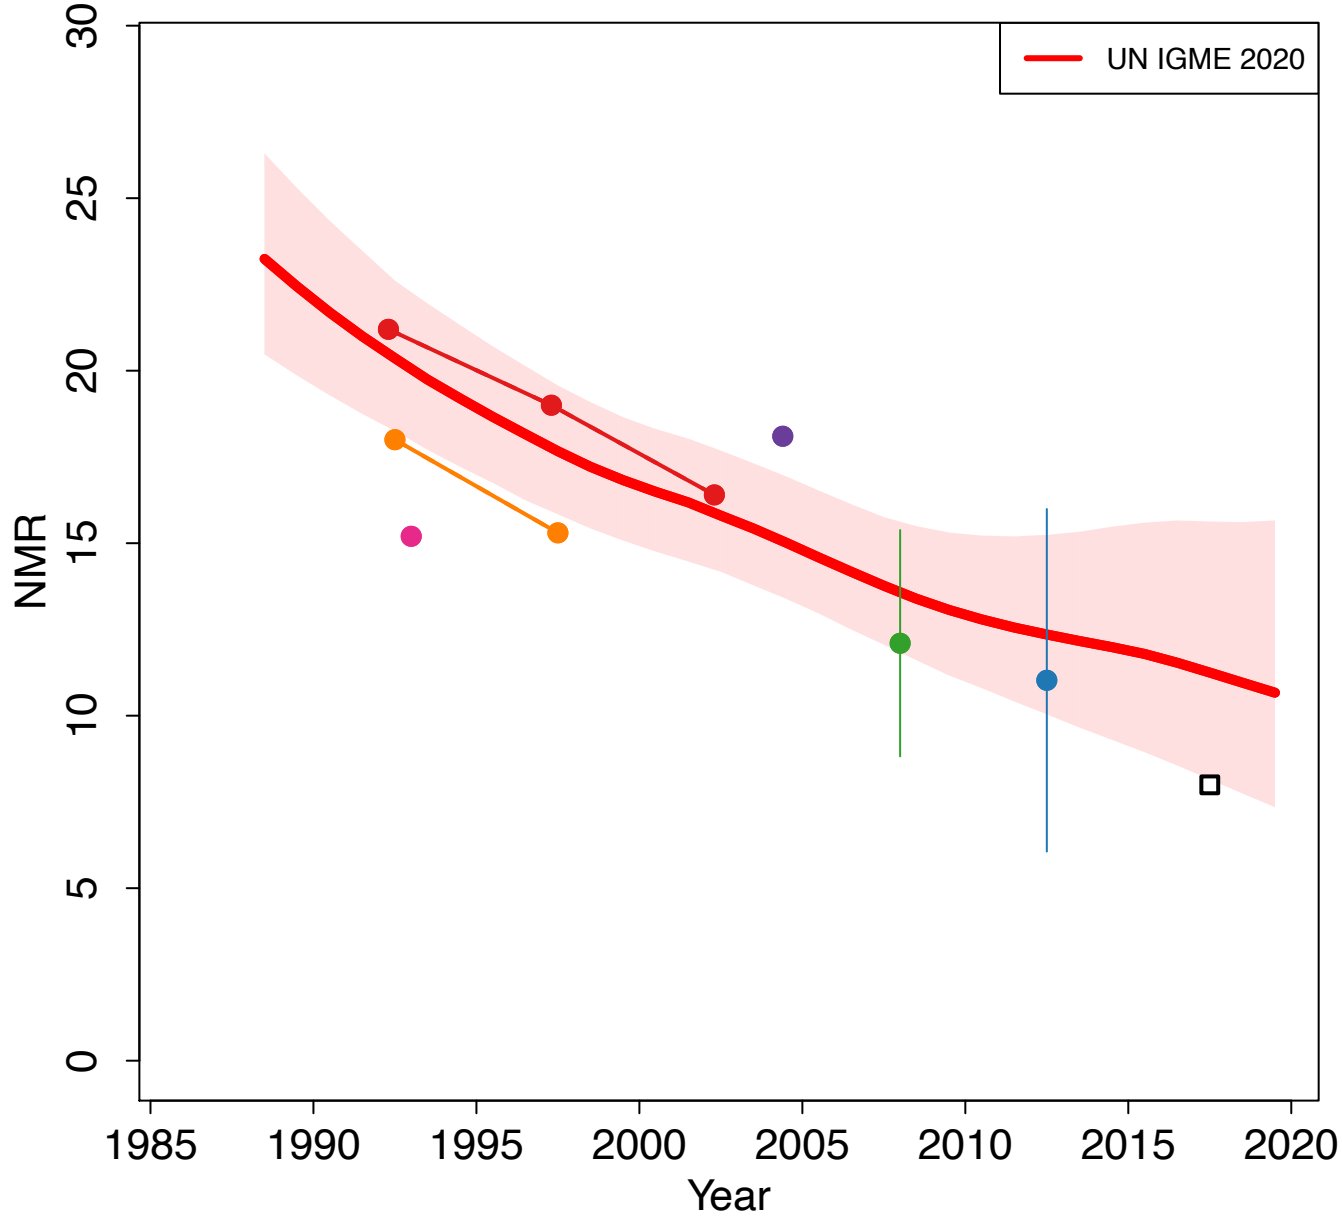

# Zoomed in

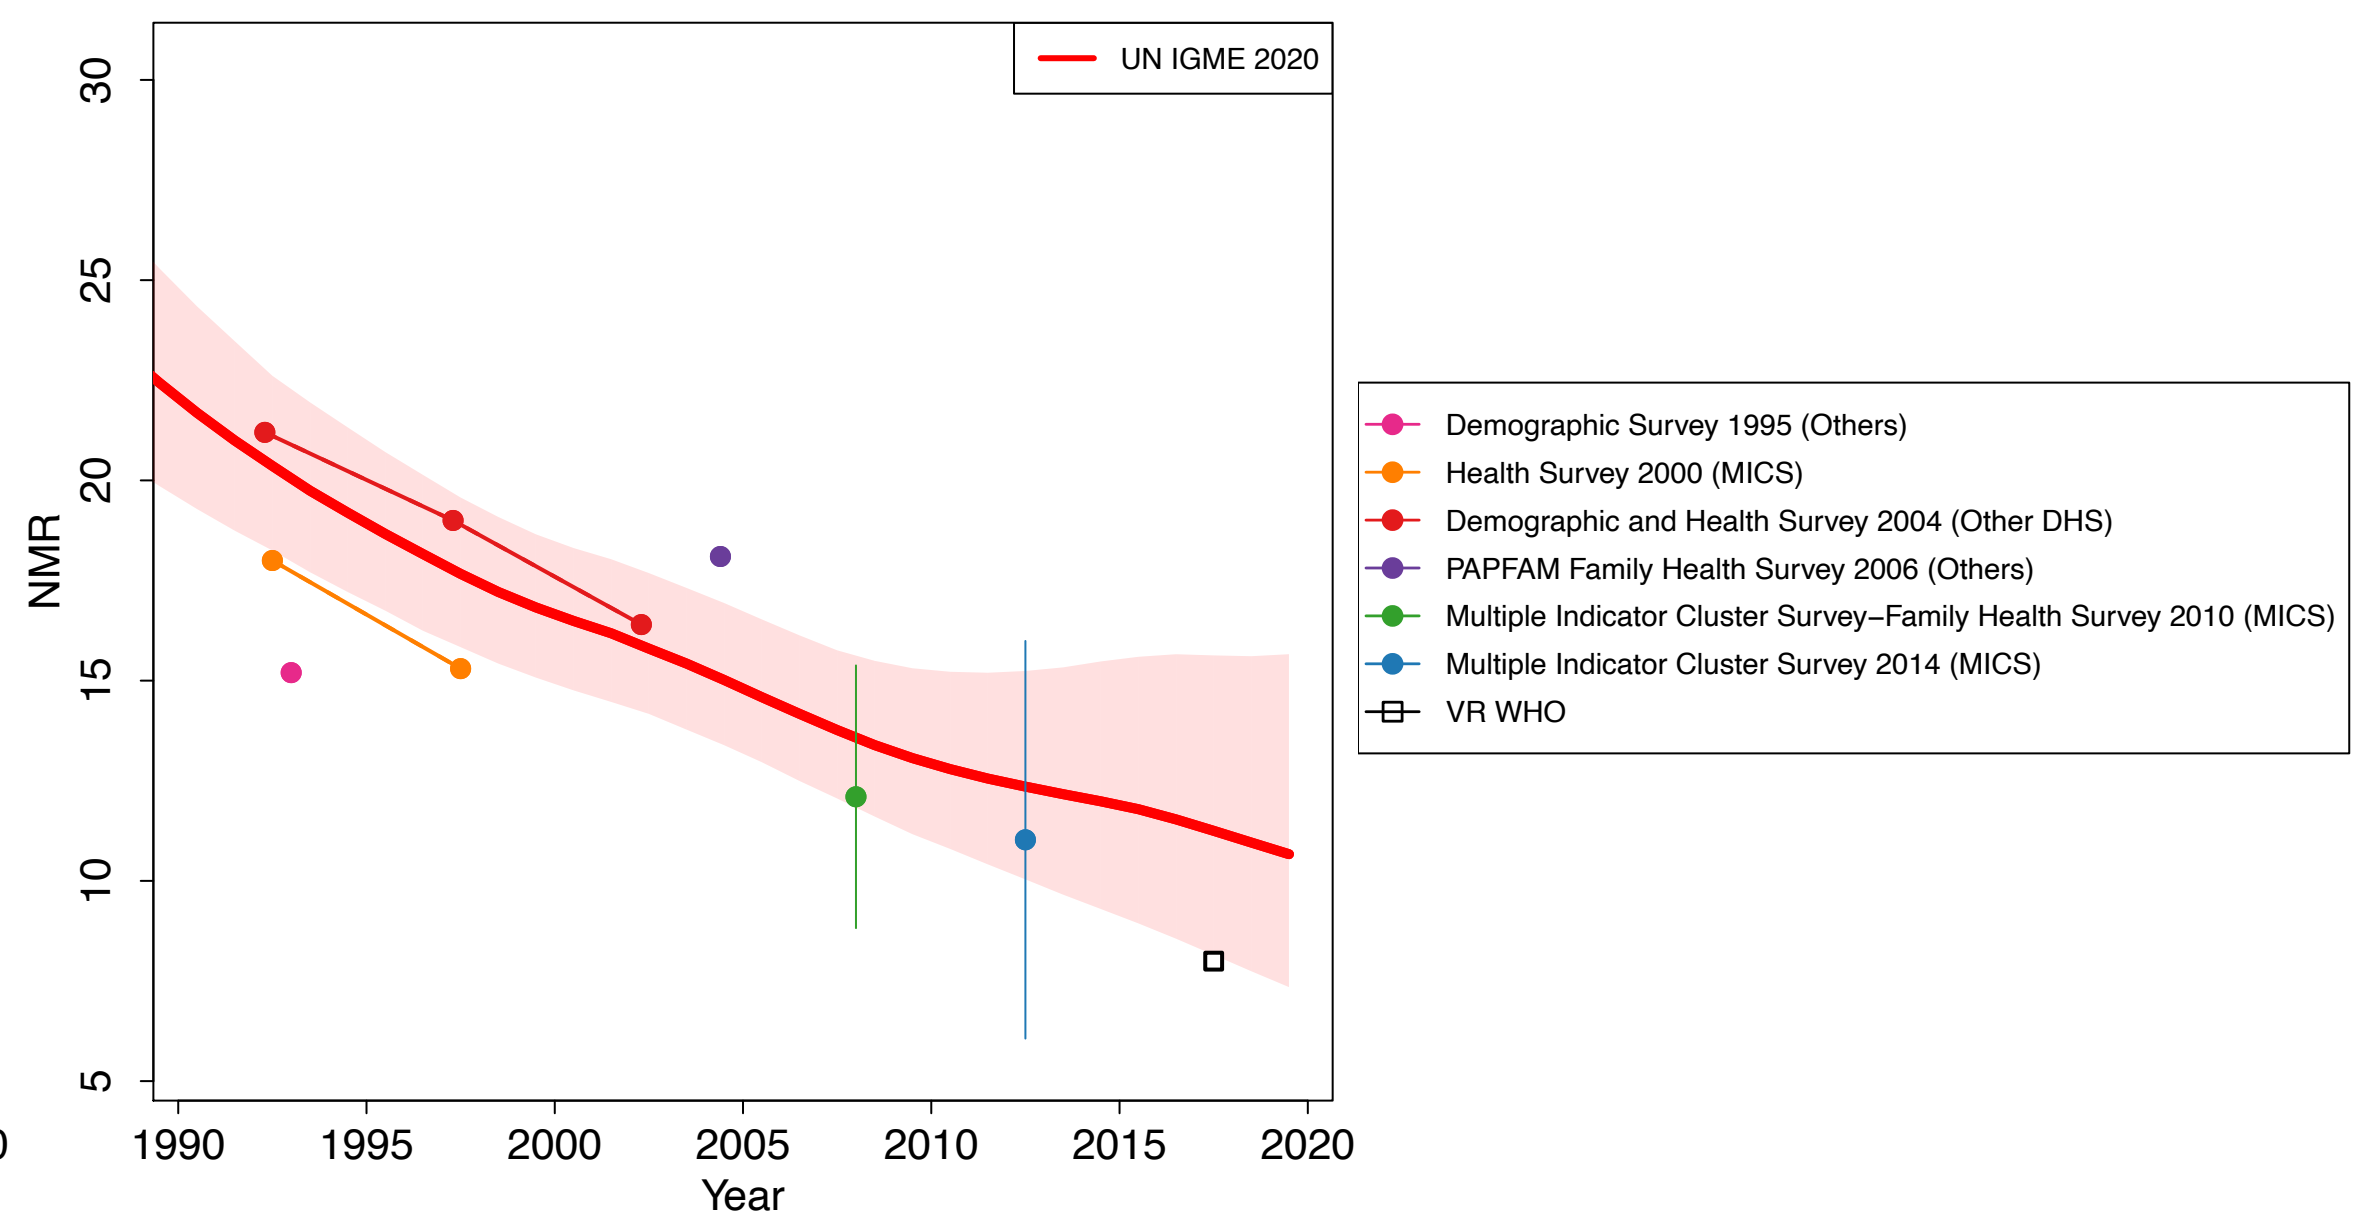

# Sudan

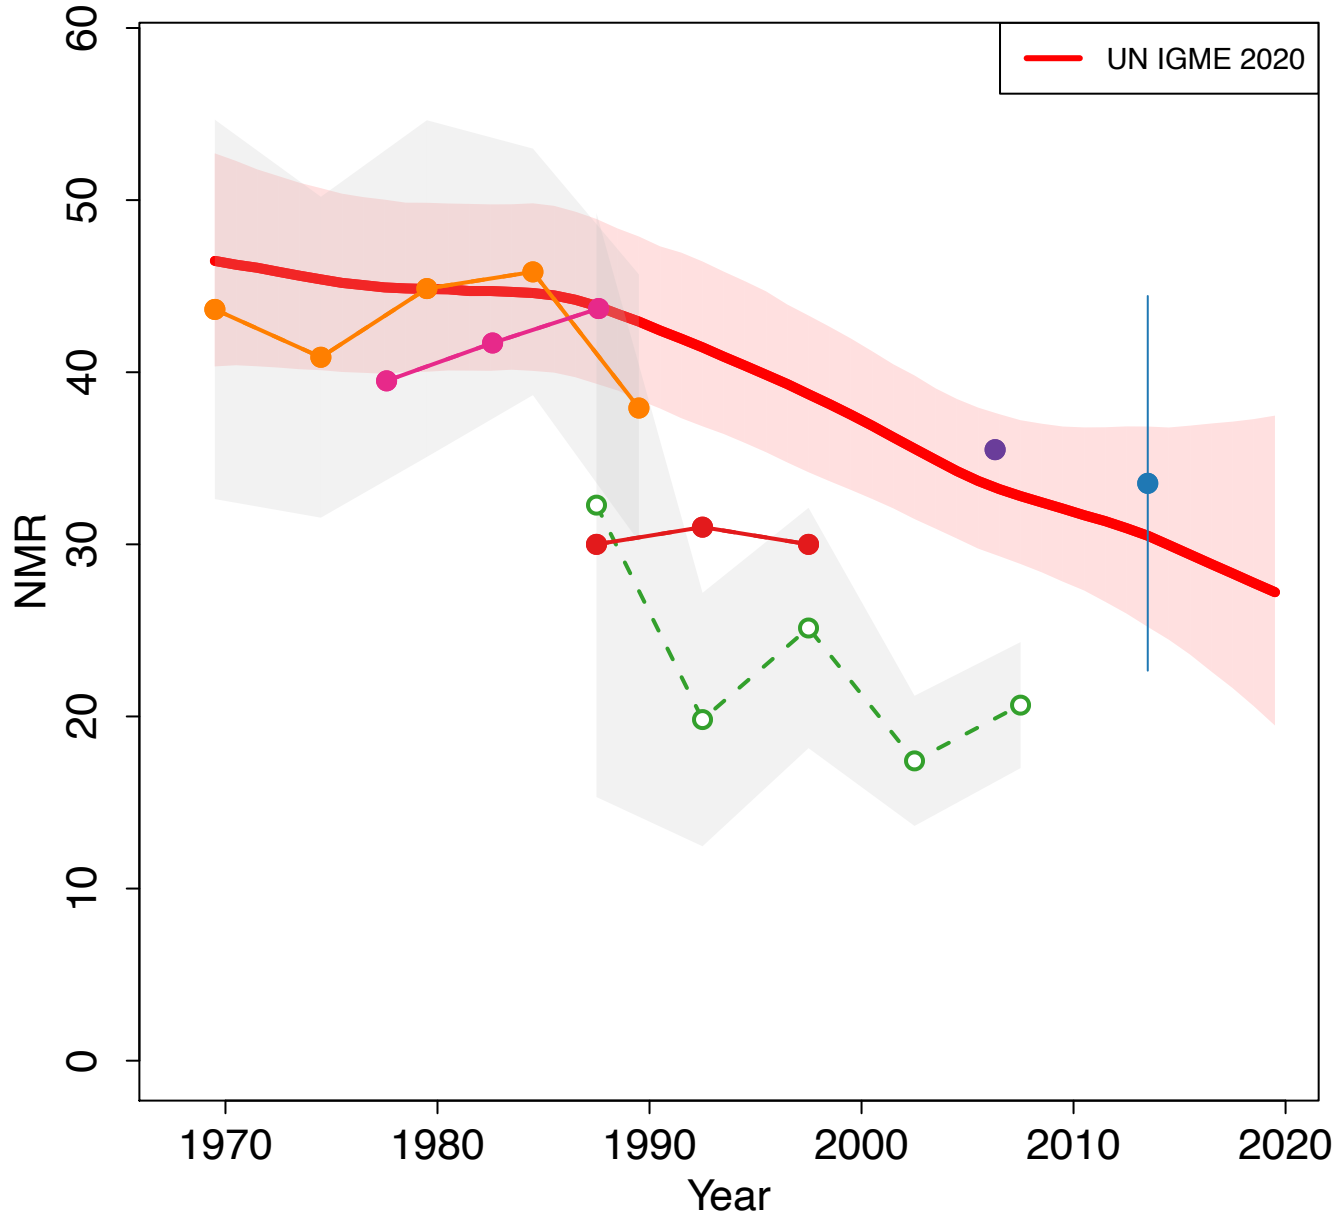

# Zoomed in

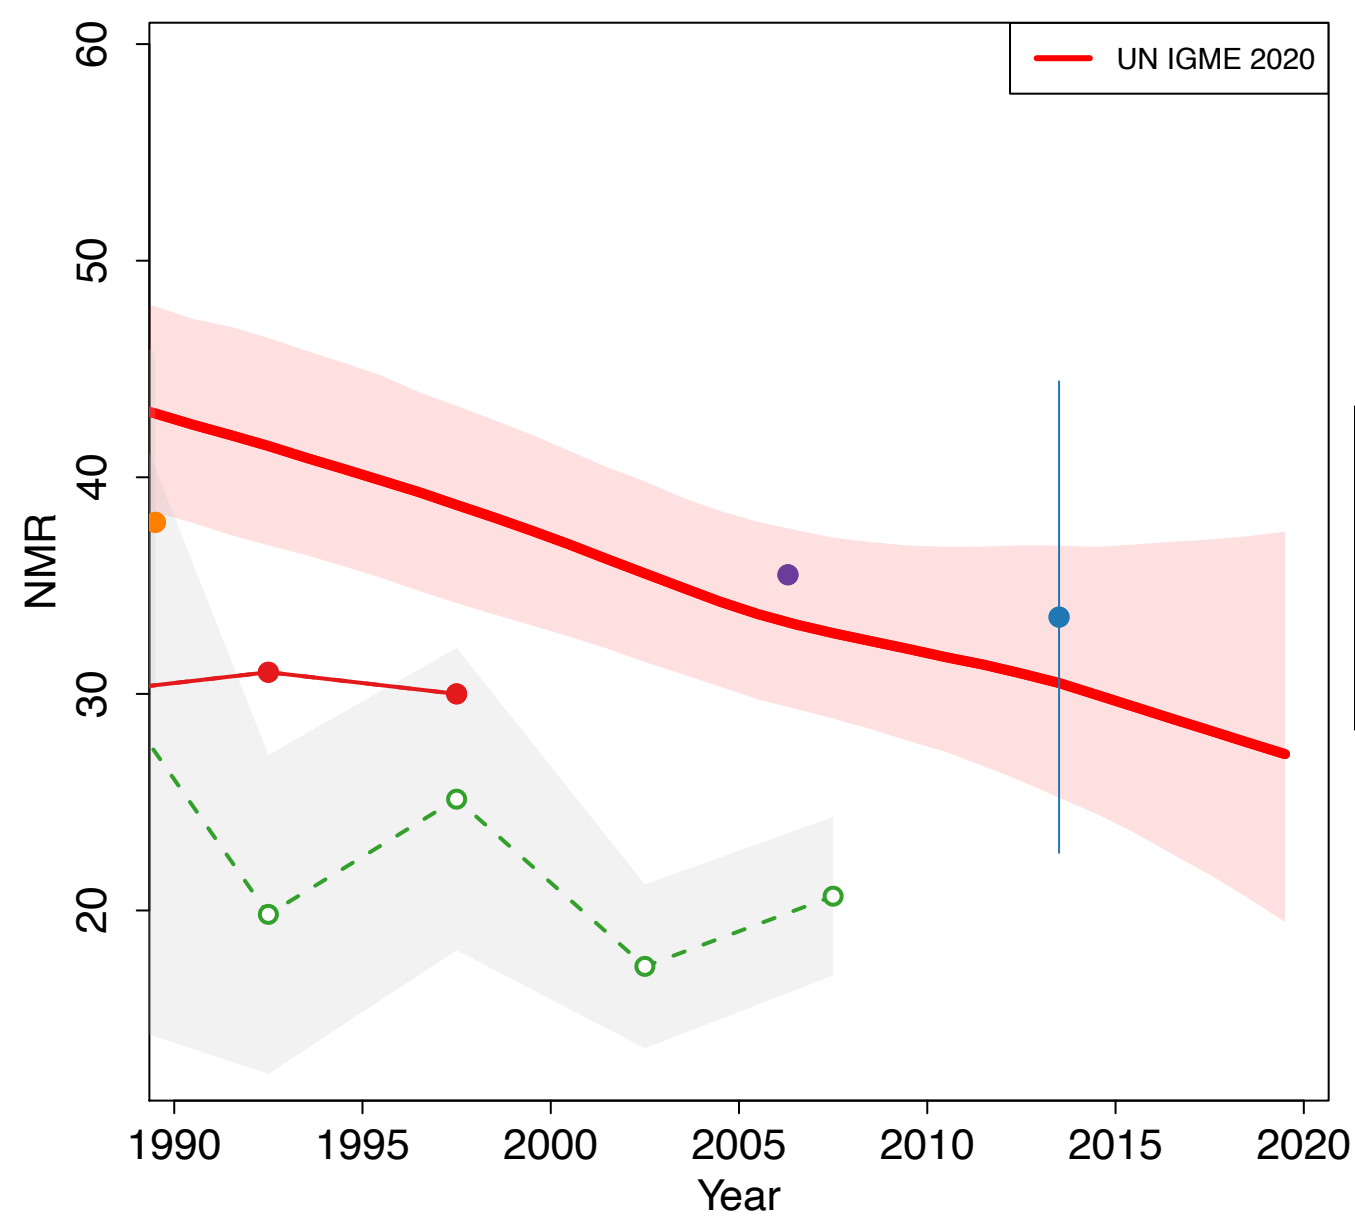

- Demographic and Health Survey 1990 (DHS)
- PAPCHILD Maternal and Child Health Survey 1992 (Others)
- Safe Motherhood Survey 1999 (Others)
- Sudan Household Health Survey 2006 (Others)
- Multiple Indicator Cluster Survey 2010 (MICS)
- Multiple Indicator Cluster Survey 2014 (MICS)

# Suriname

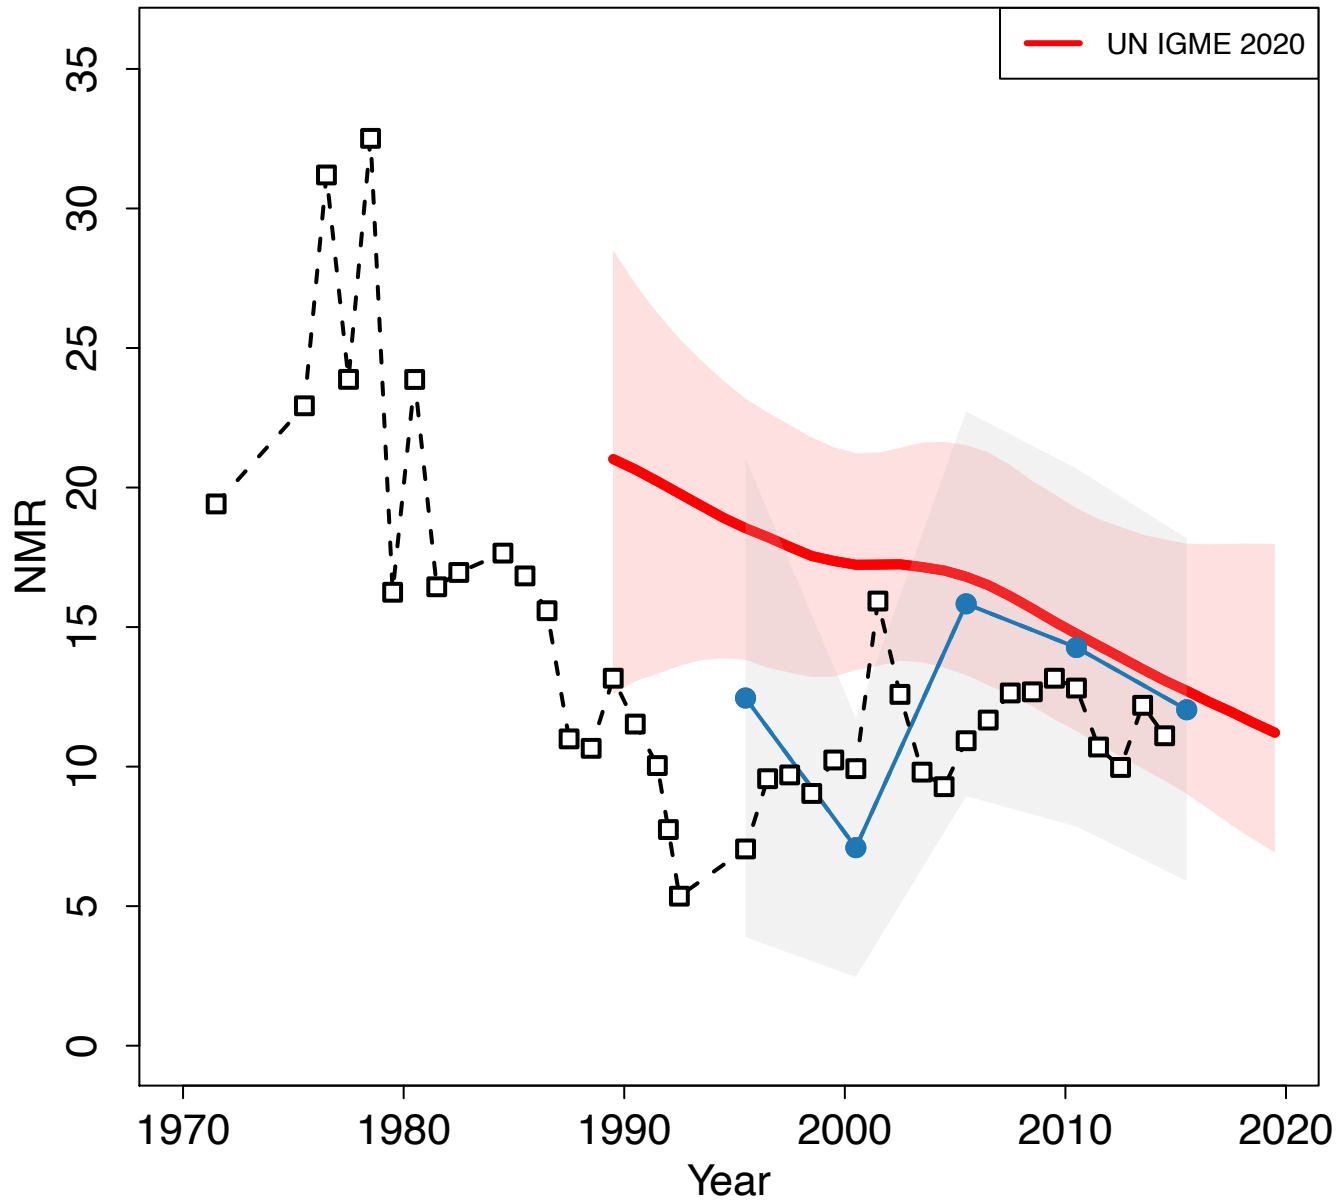

# Zoomed in

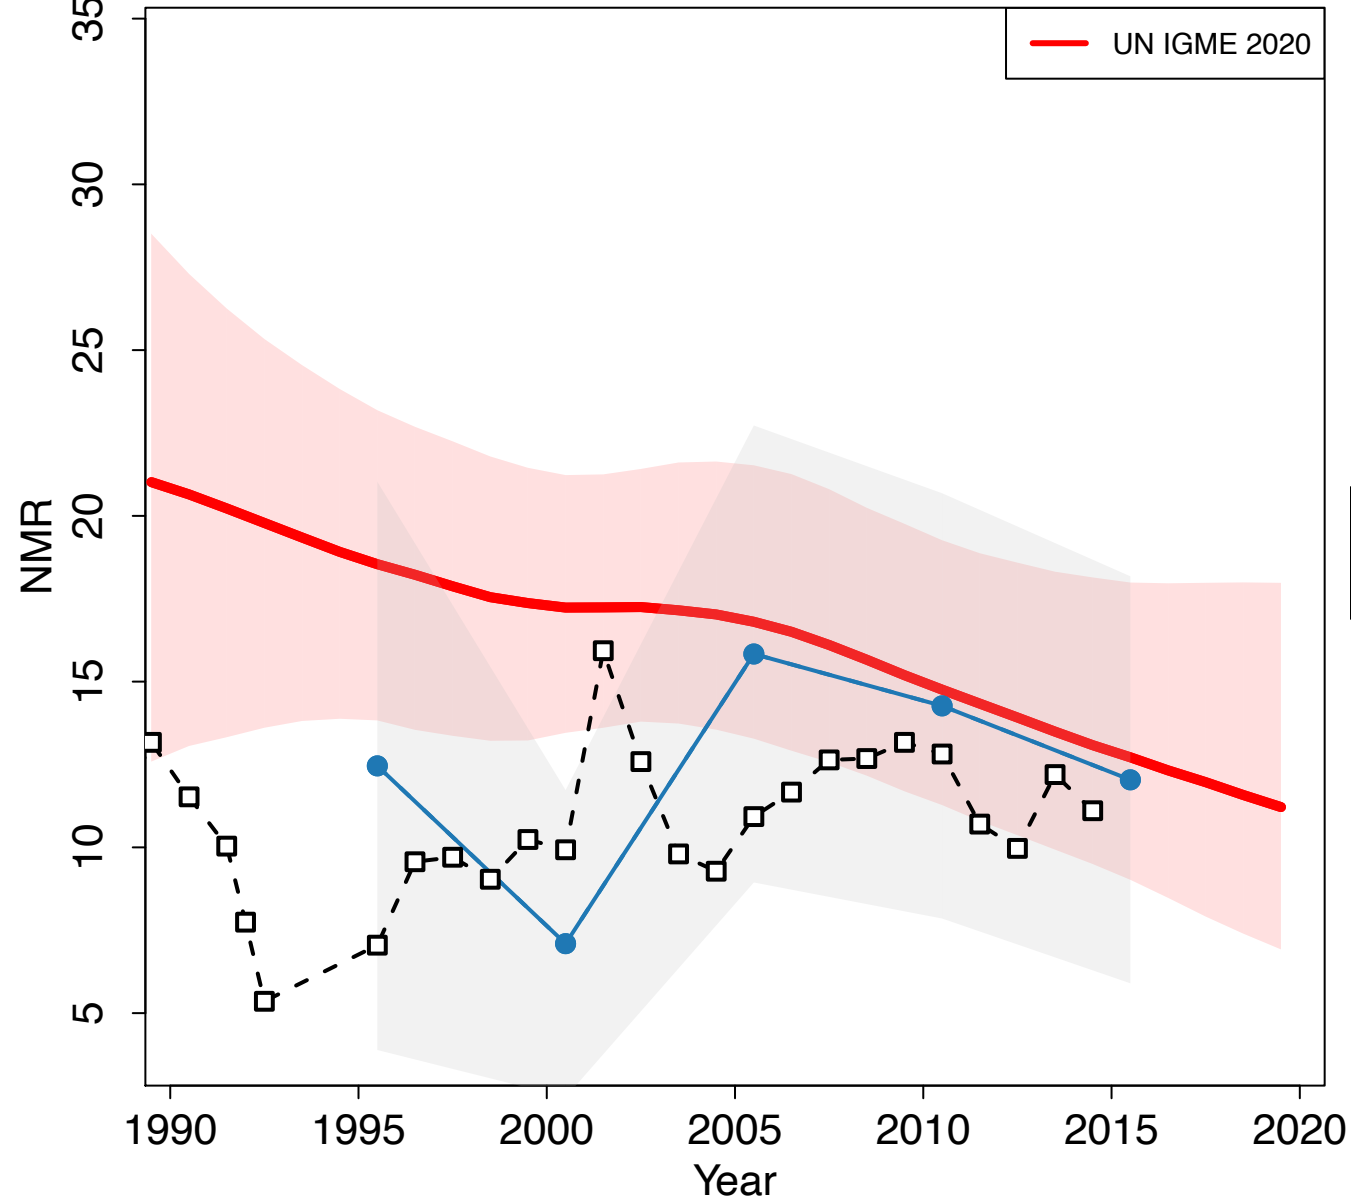

# Eswatini

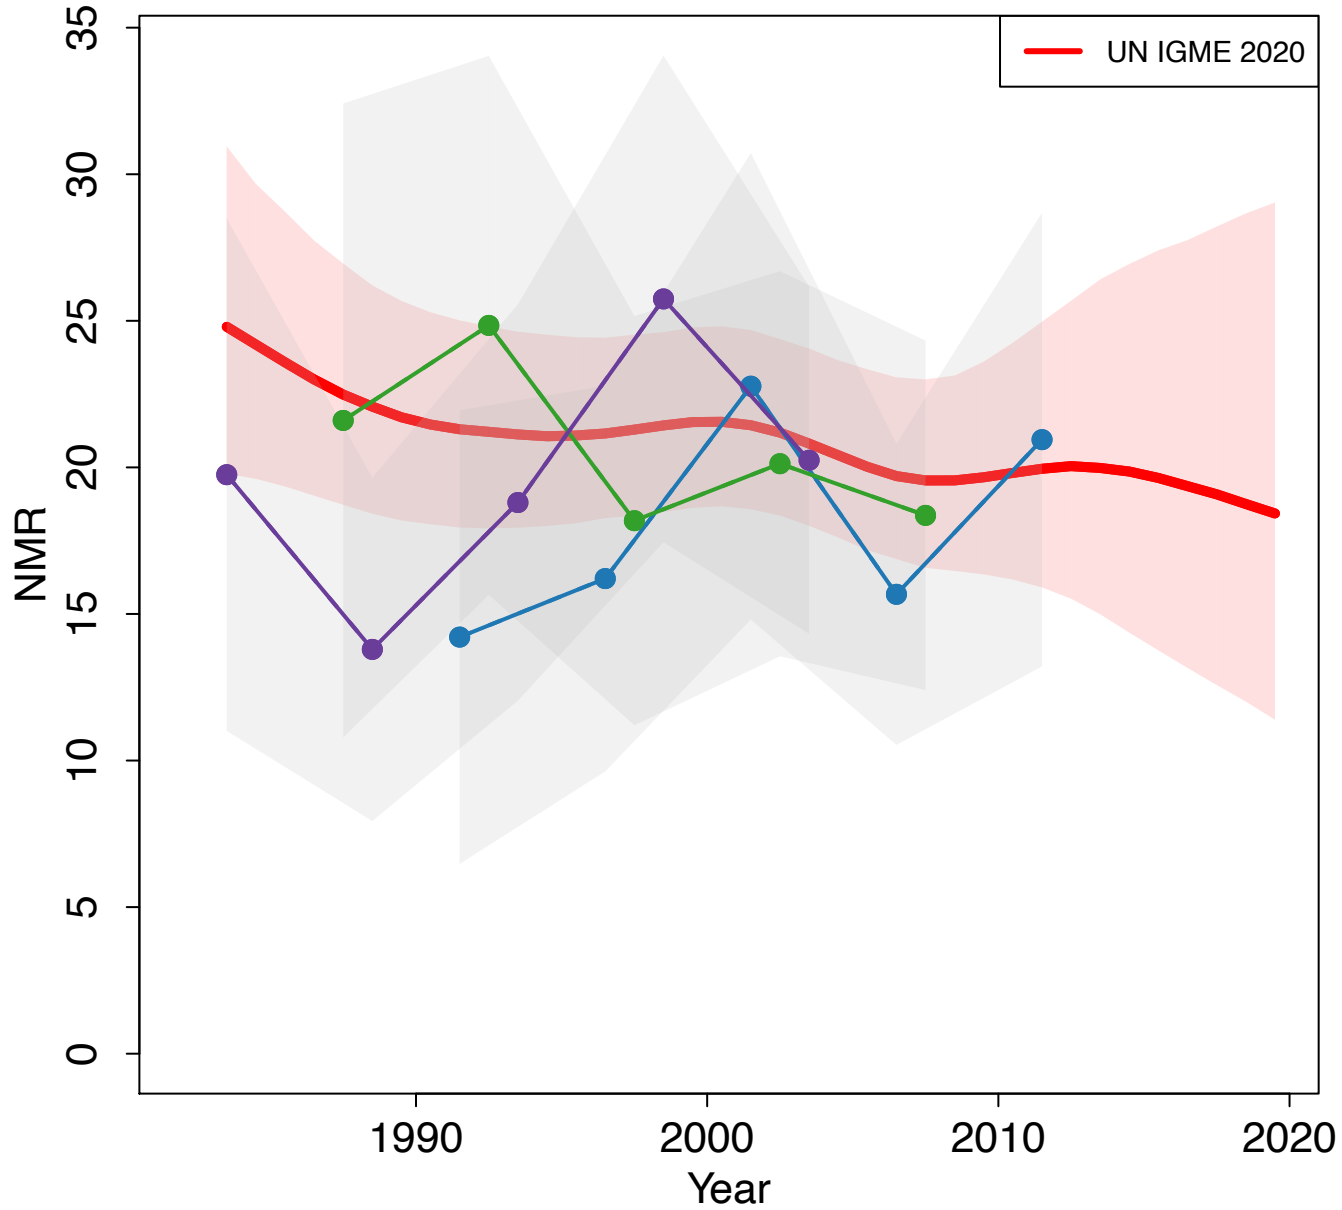

# Zoomed in

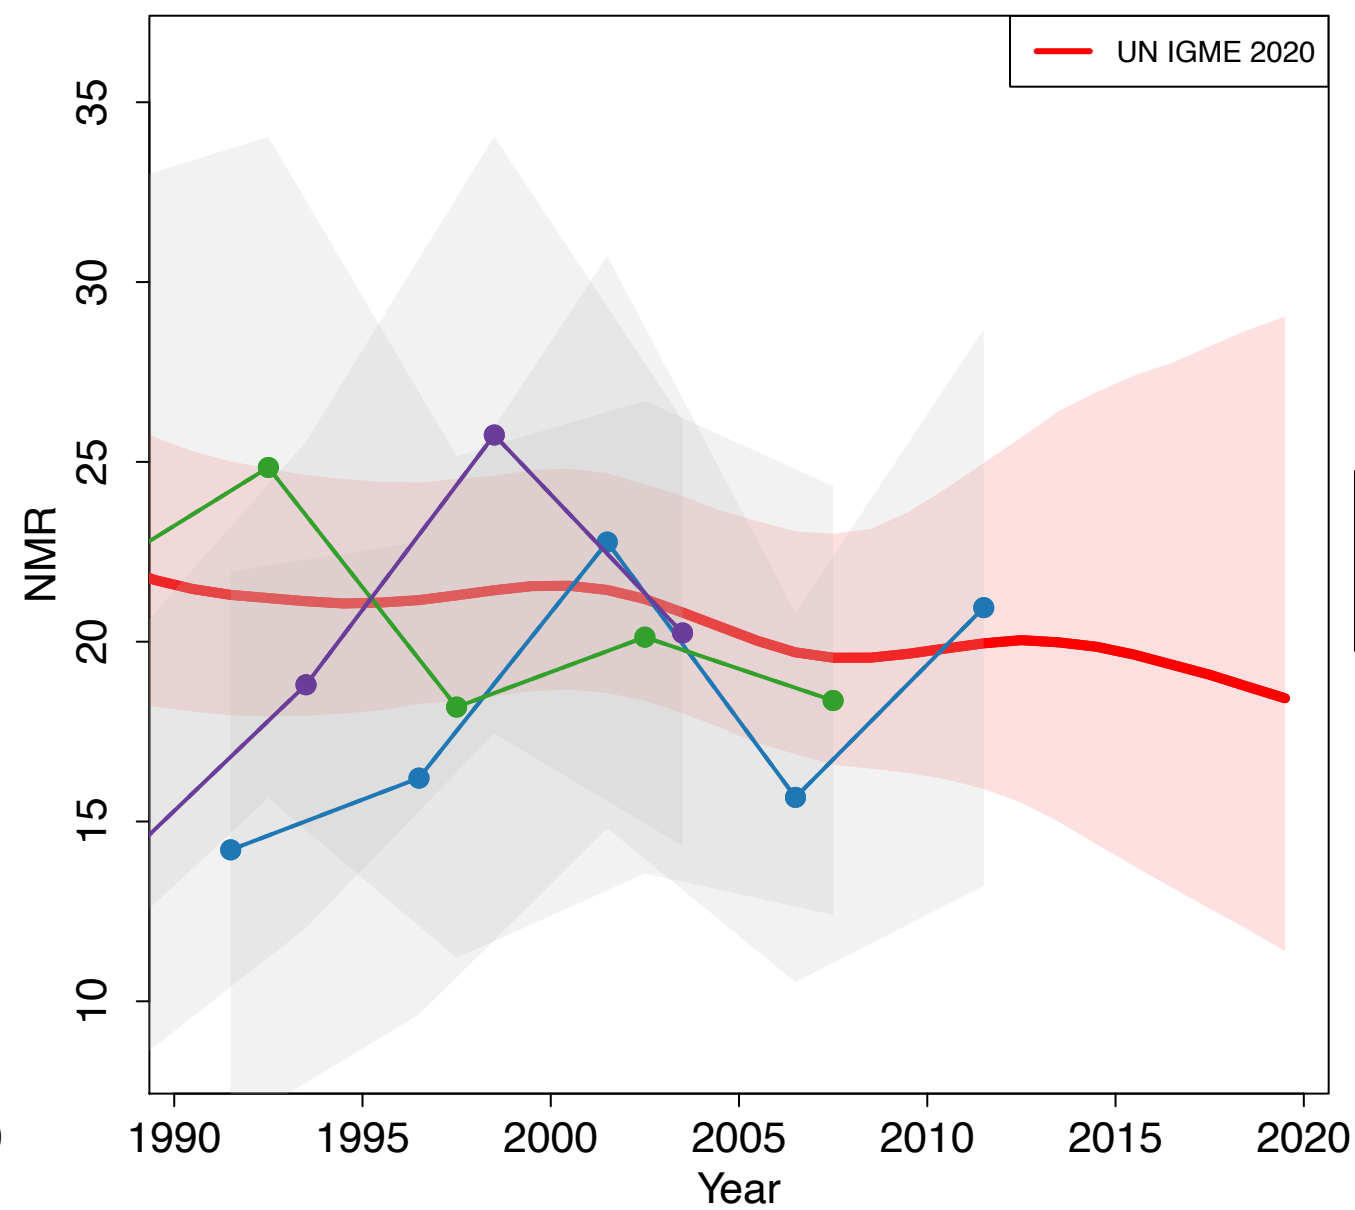

# Sweden

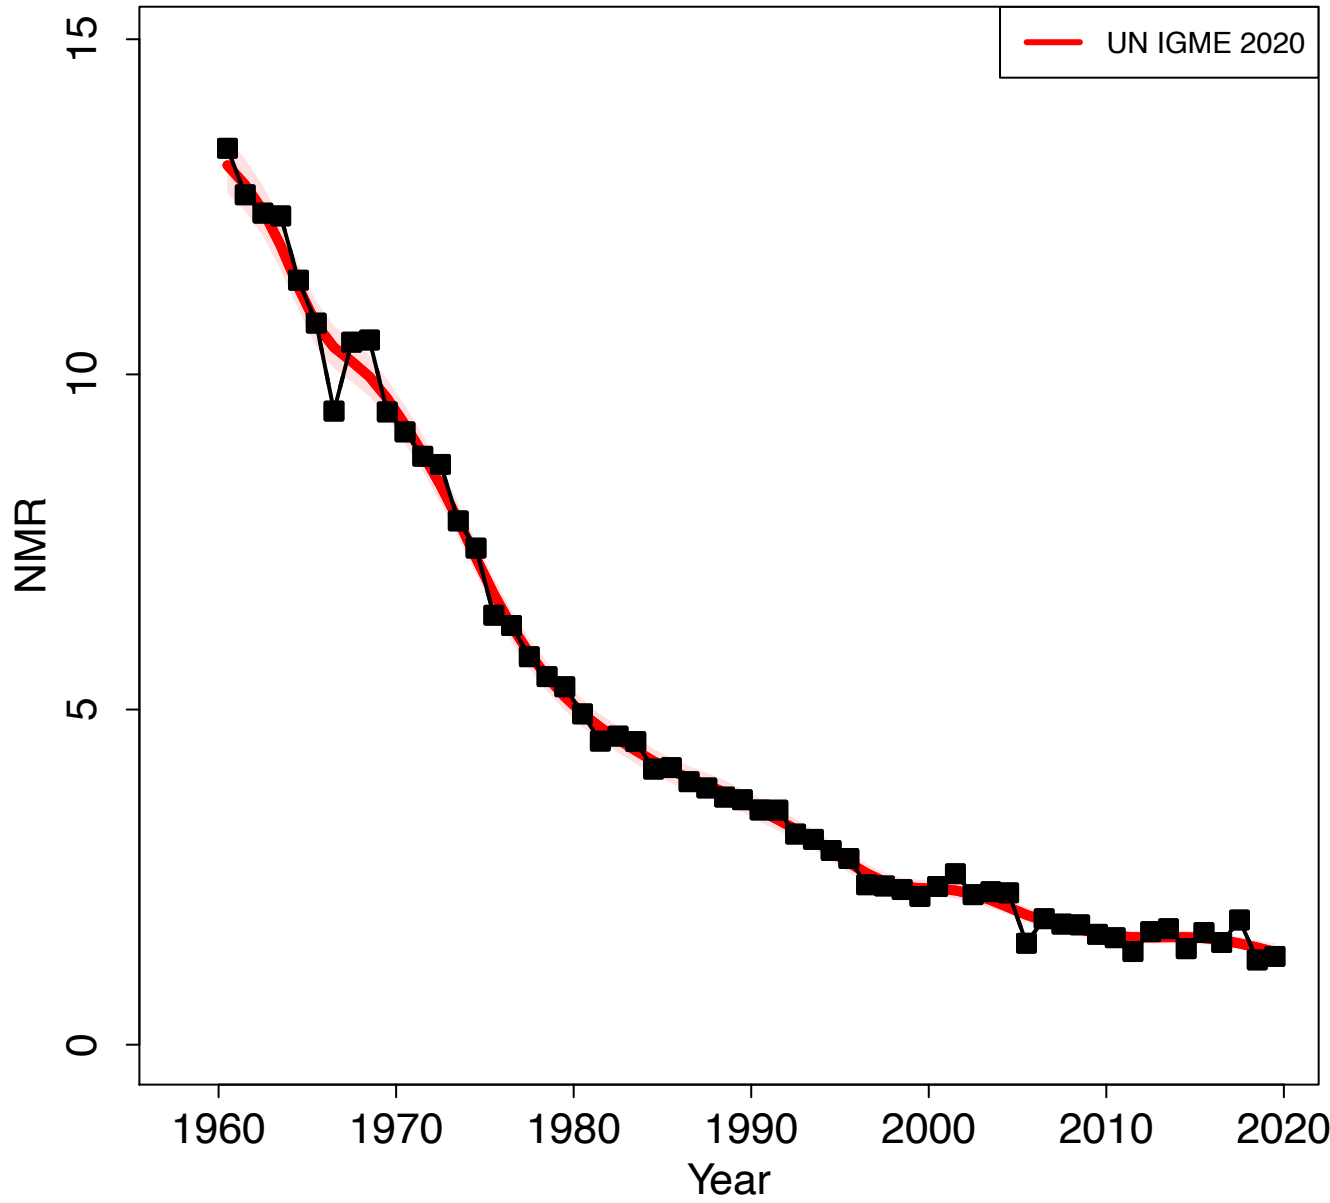

# Zoomed in

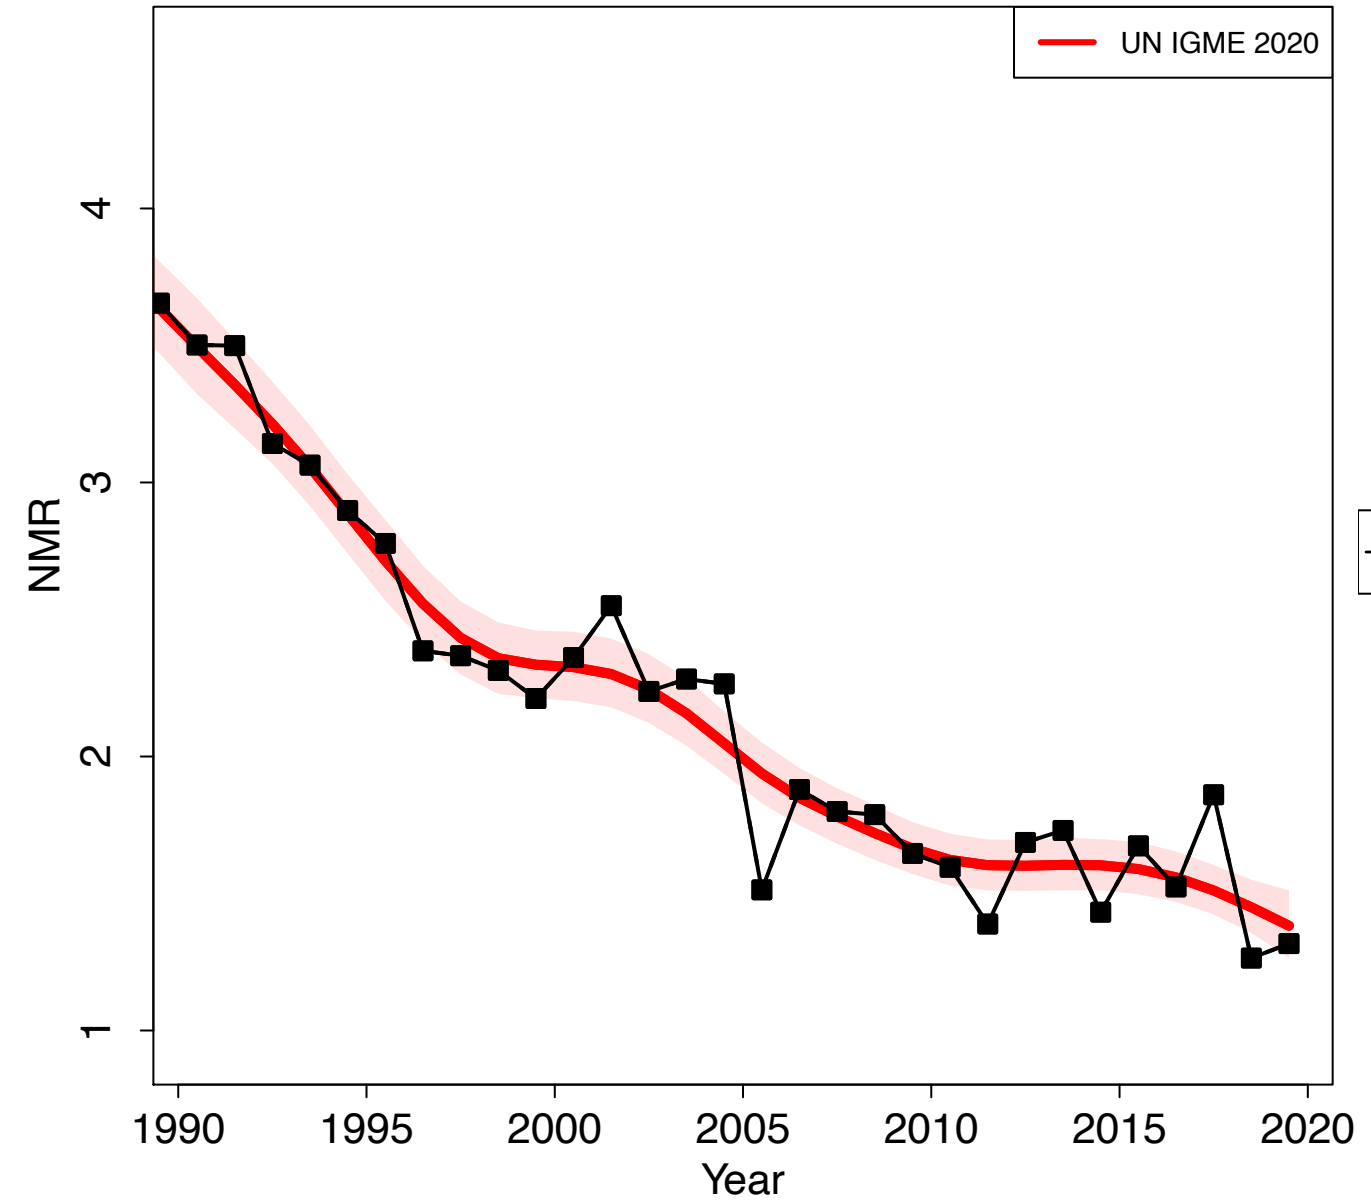

# Switzerland

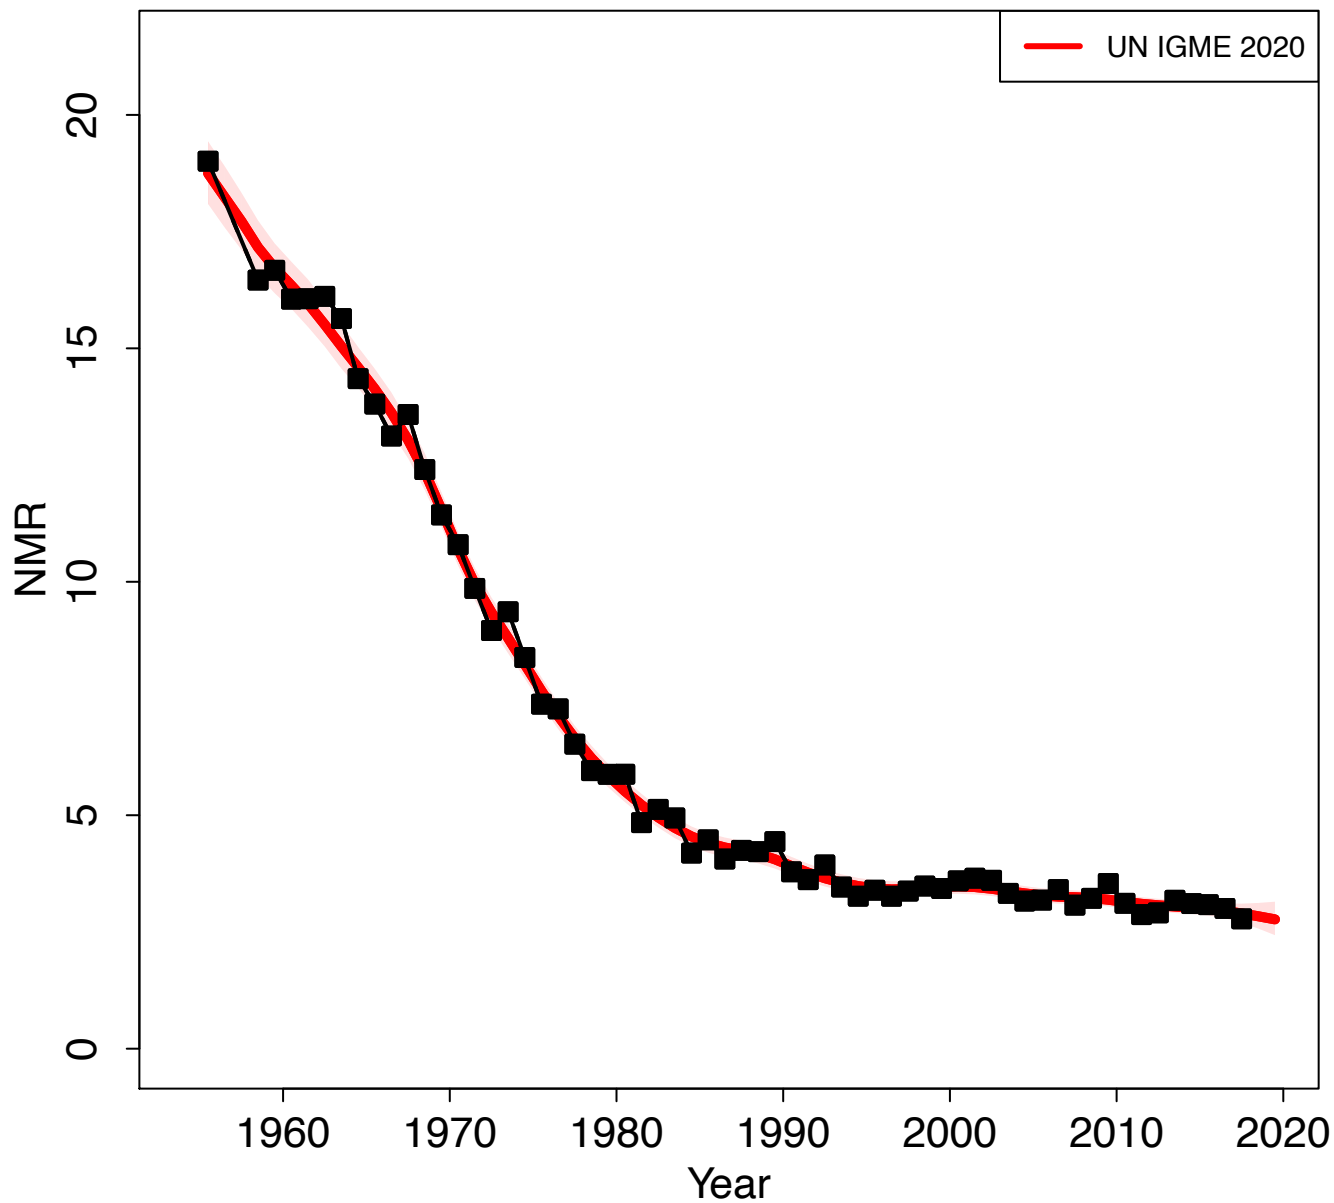

# Zoomed in

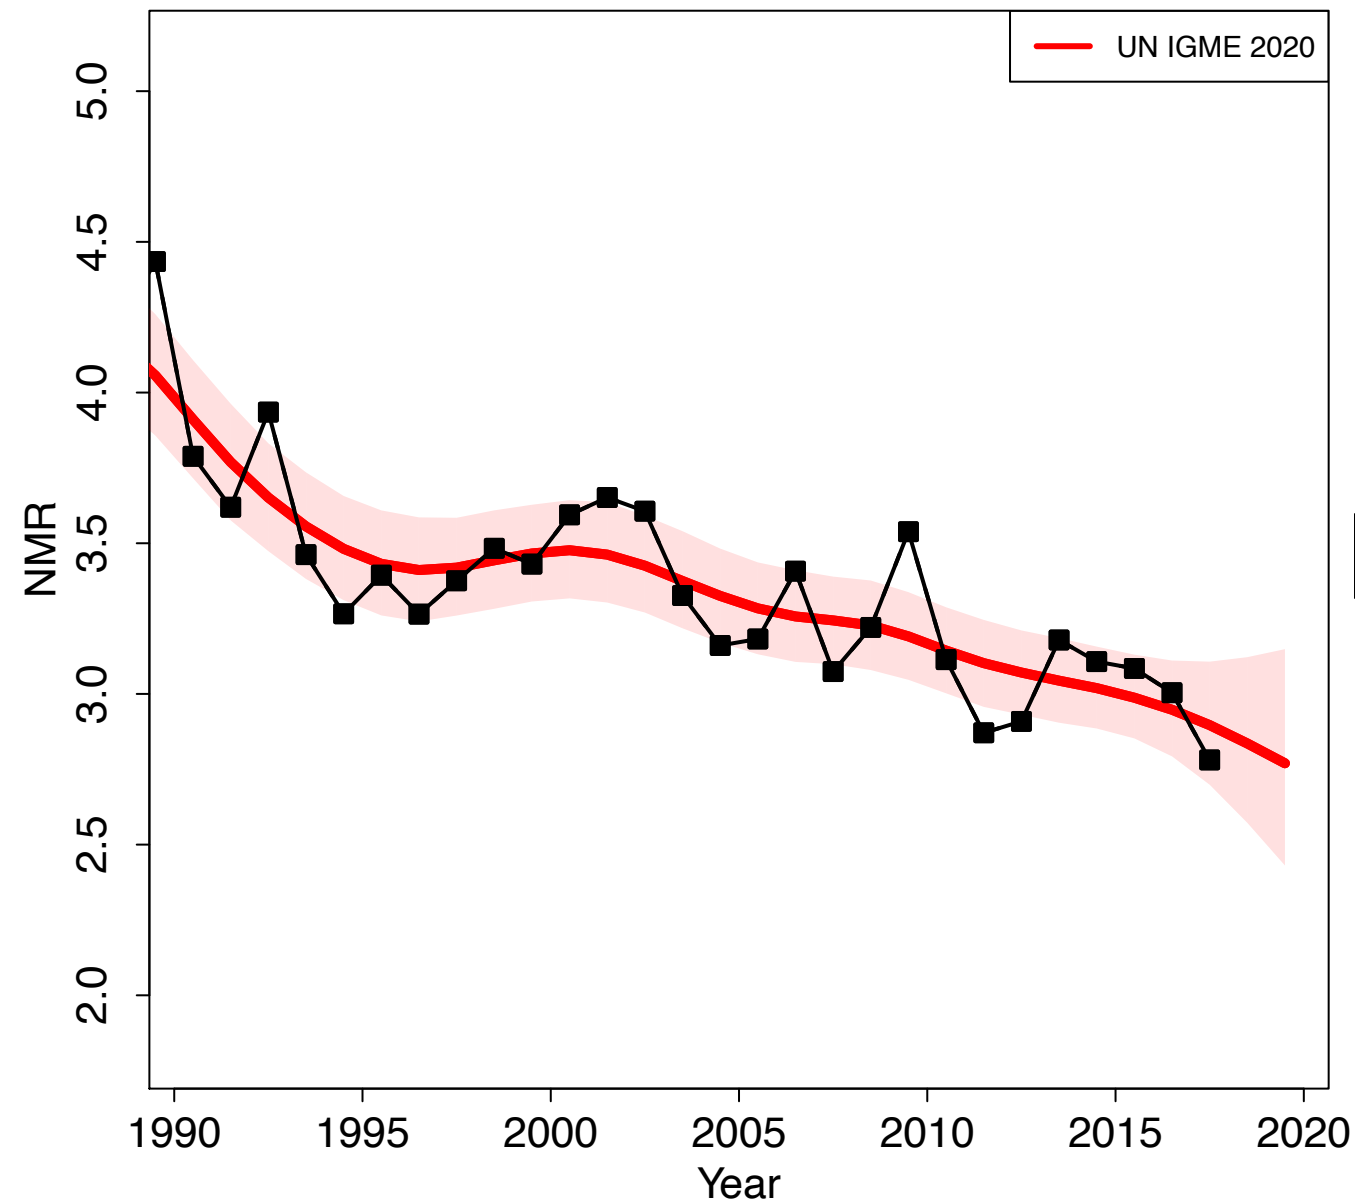

# Syrian Arab Republic

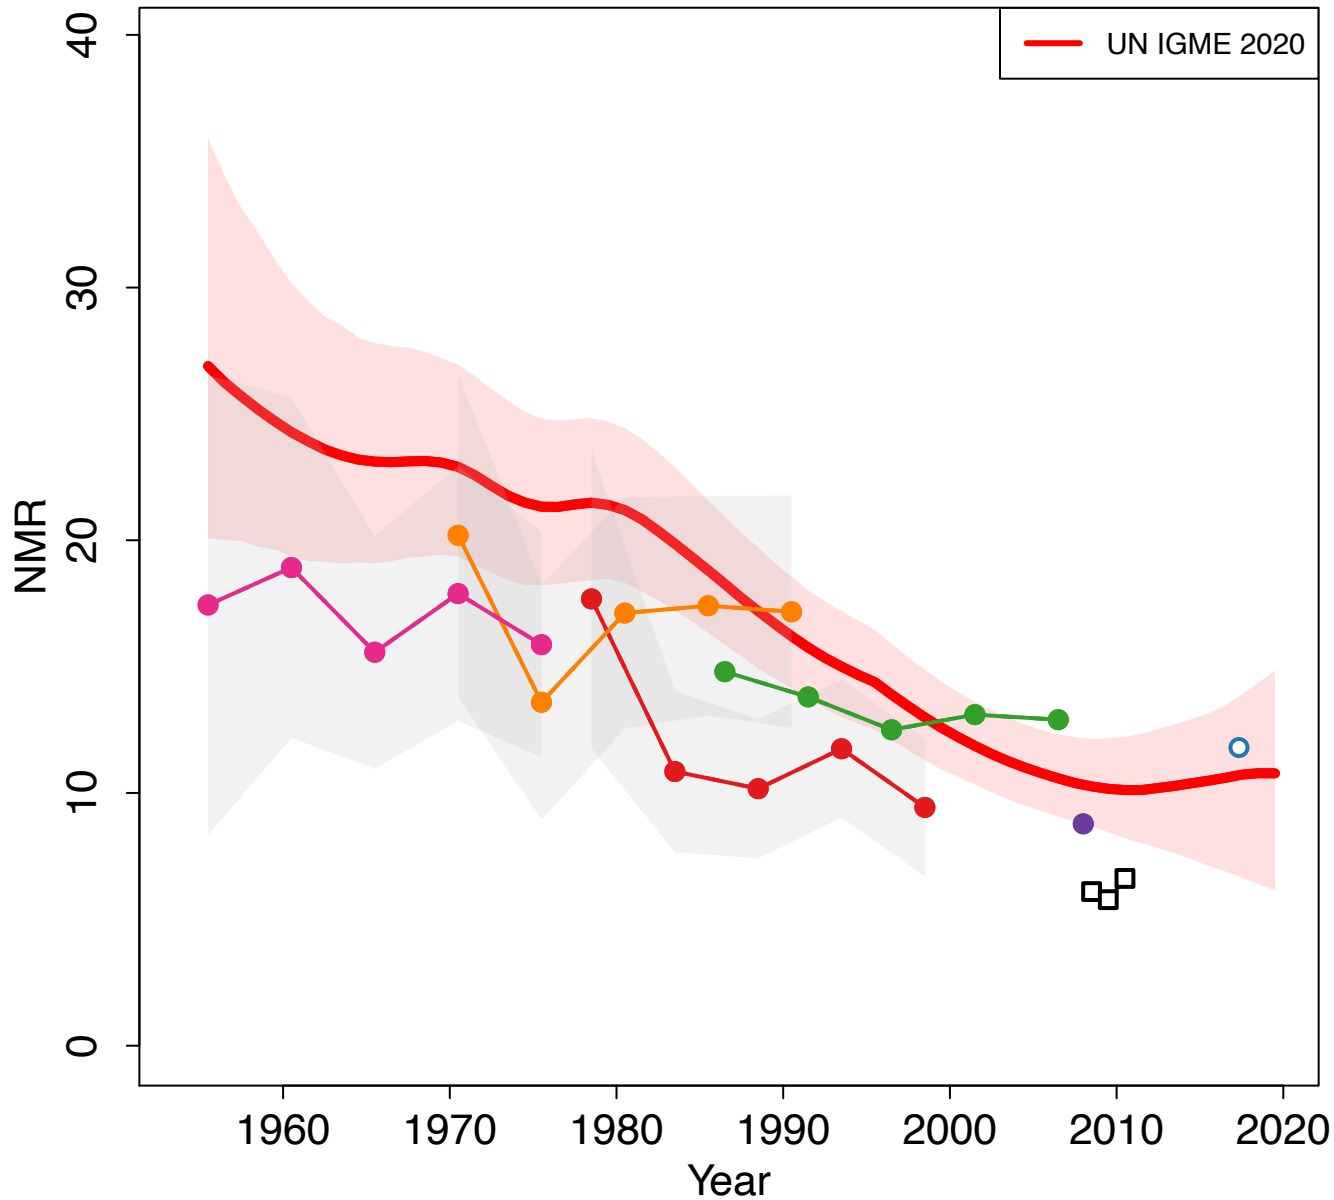

# Zoomed in

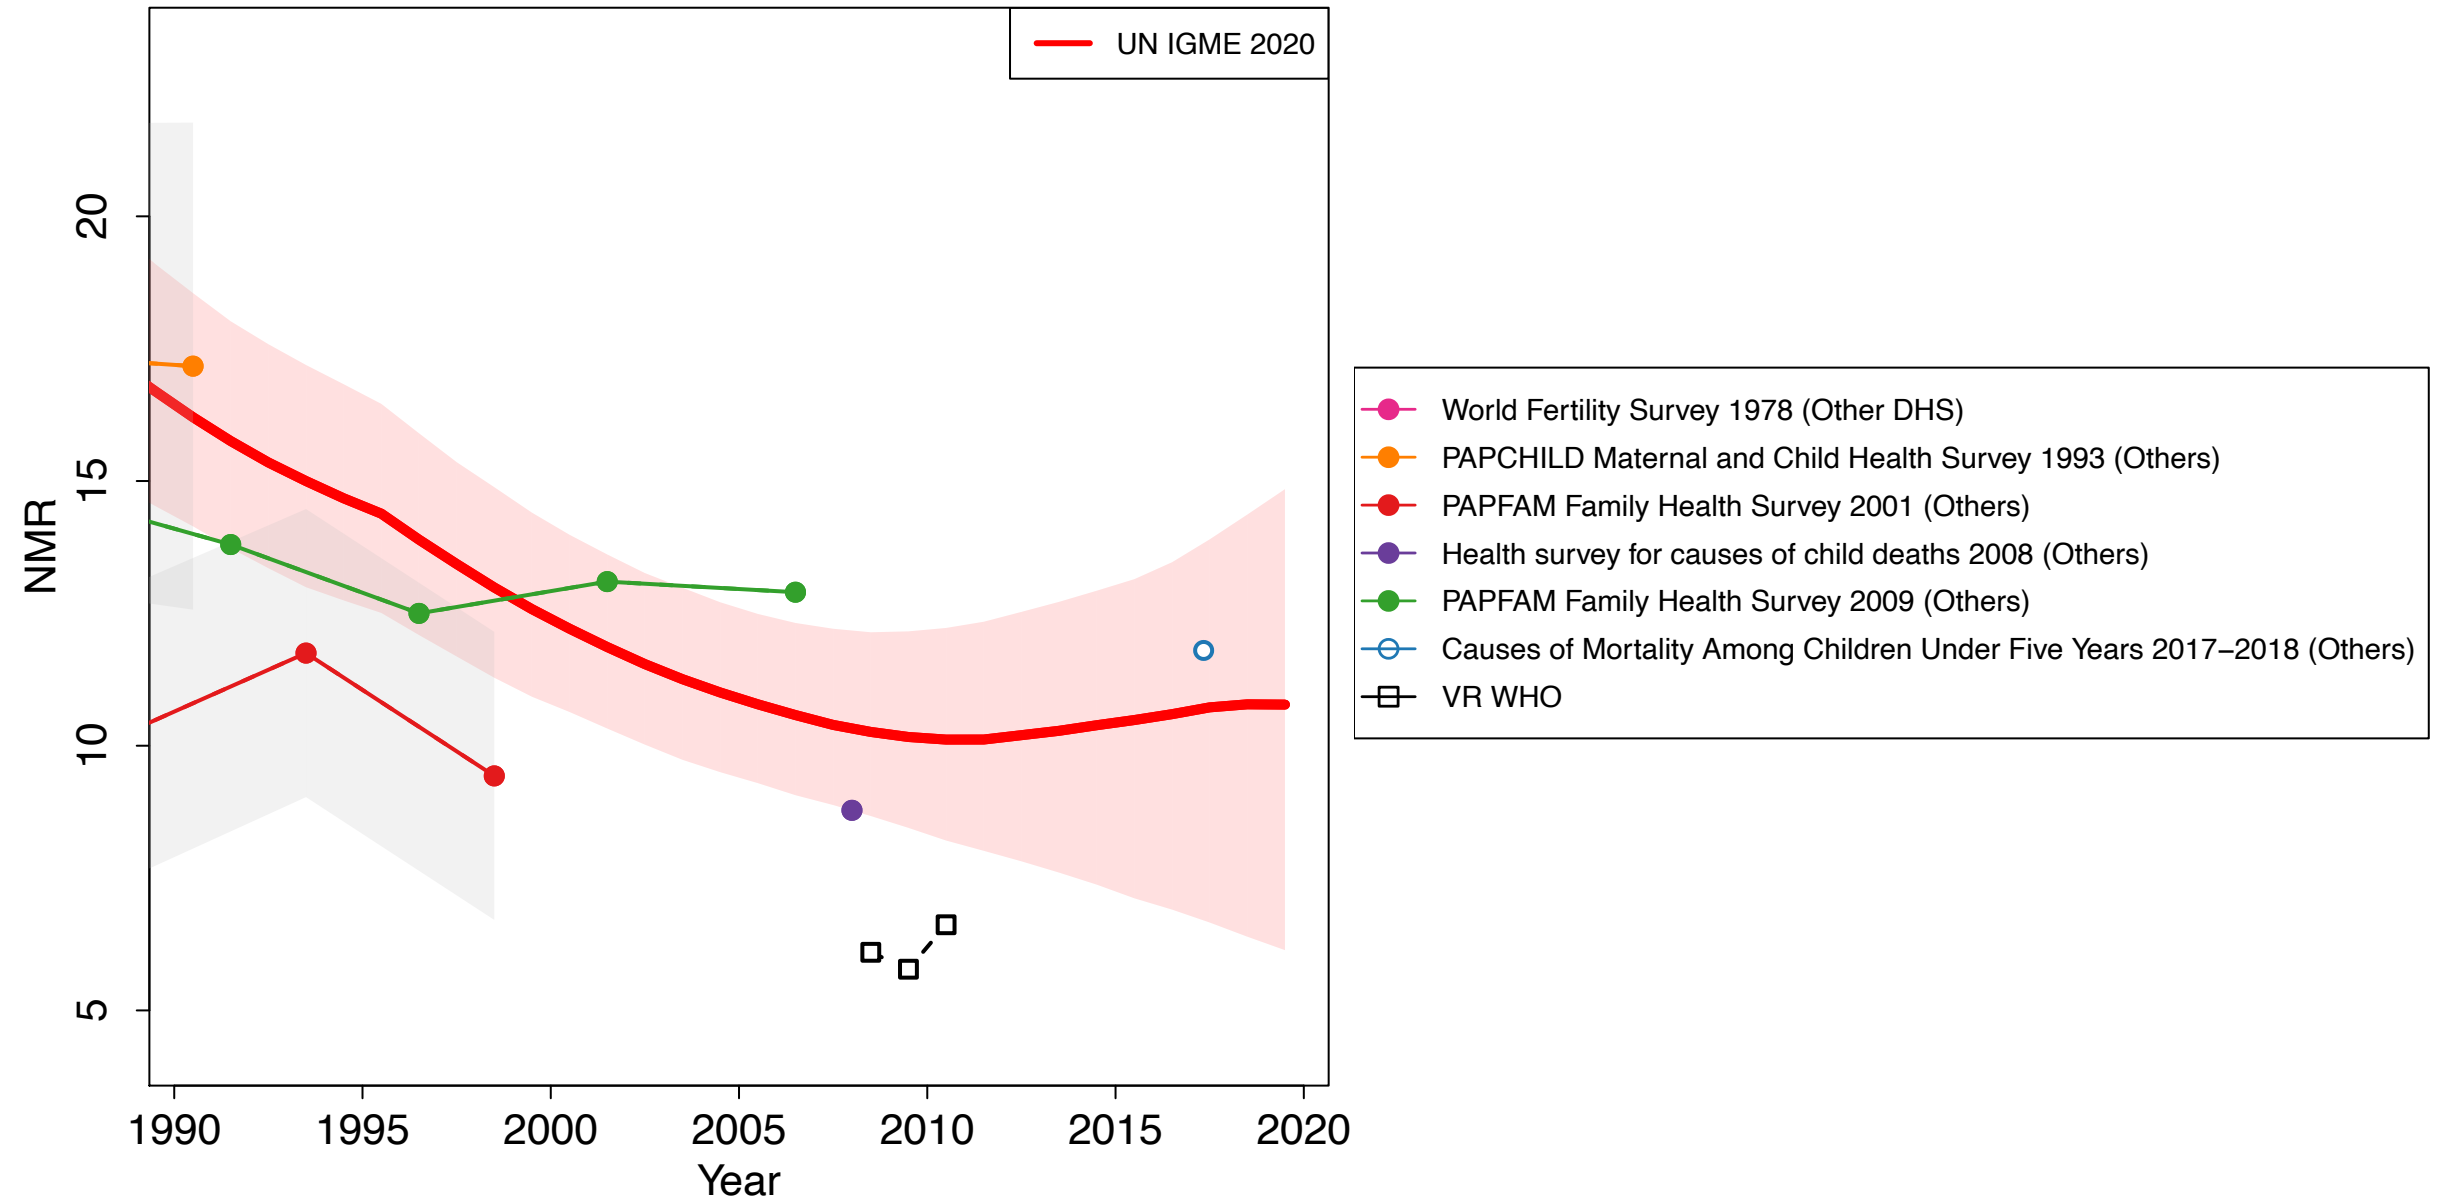



# Tajikistan

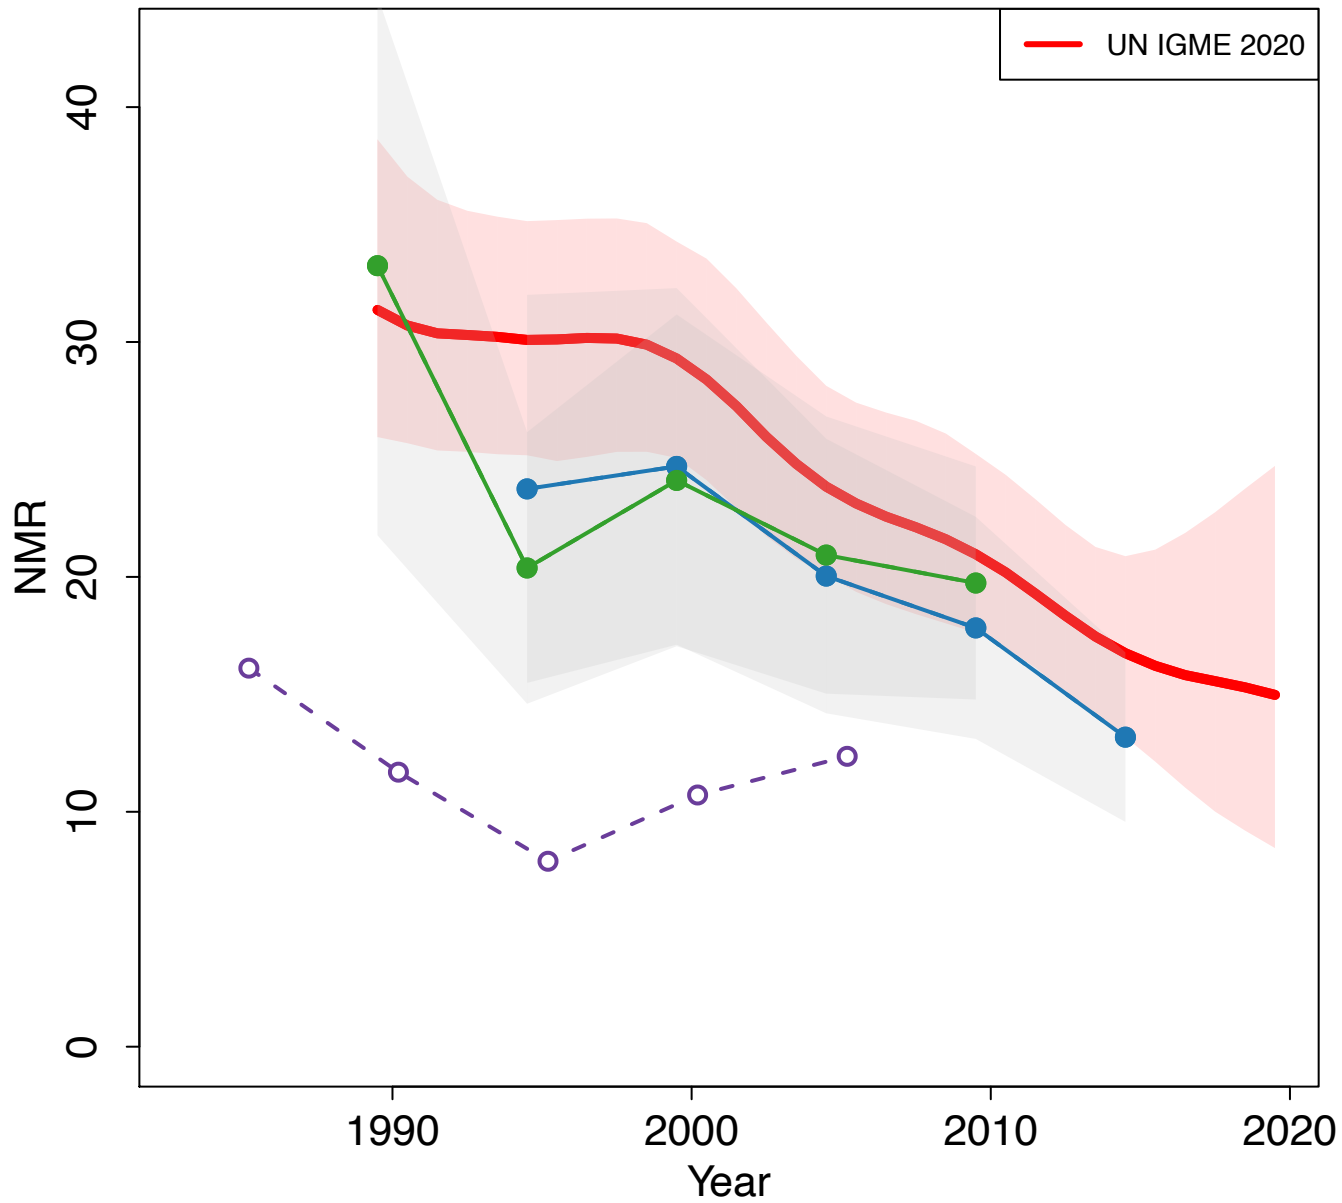

# Zoomed in

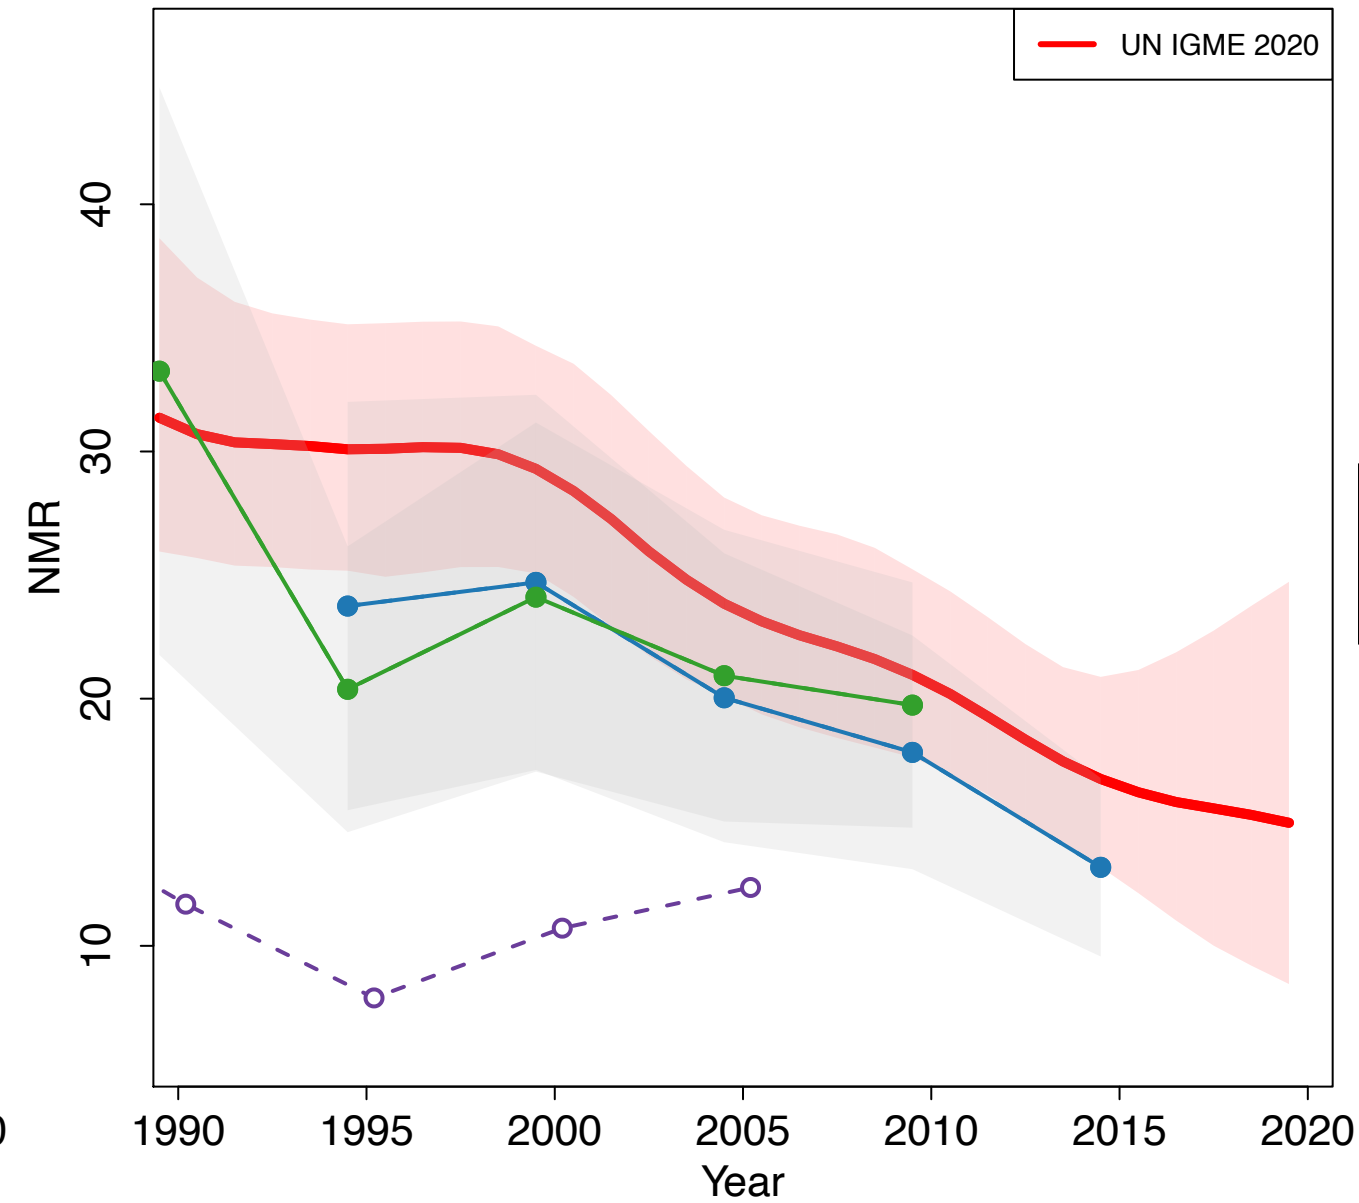

# United Republic of Tanzania

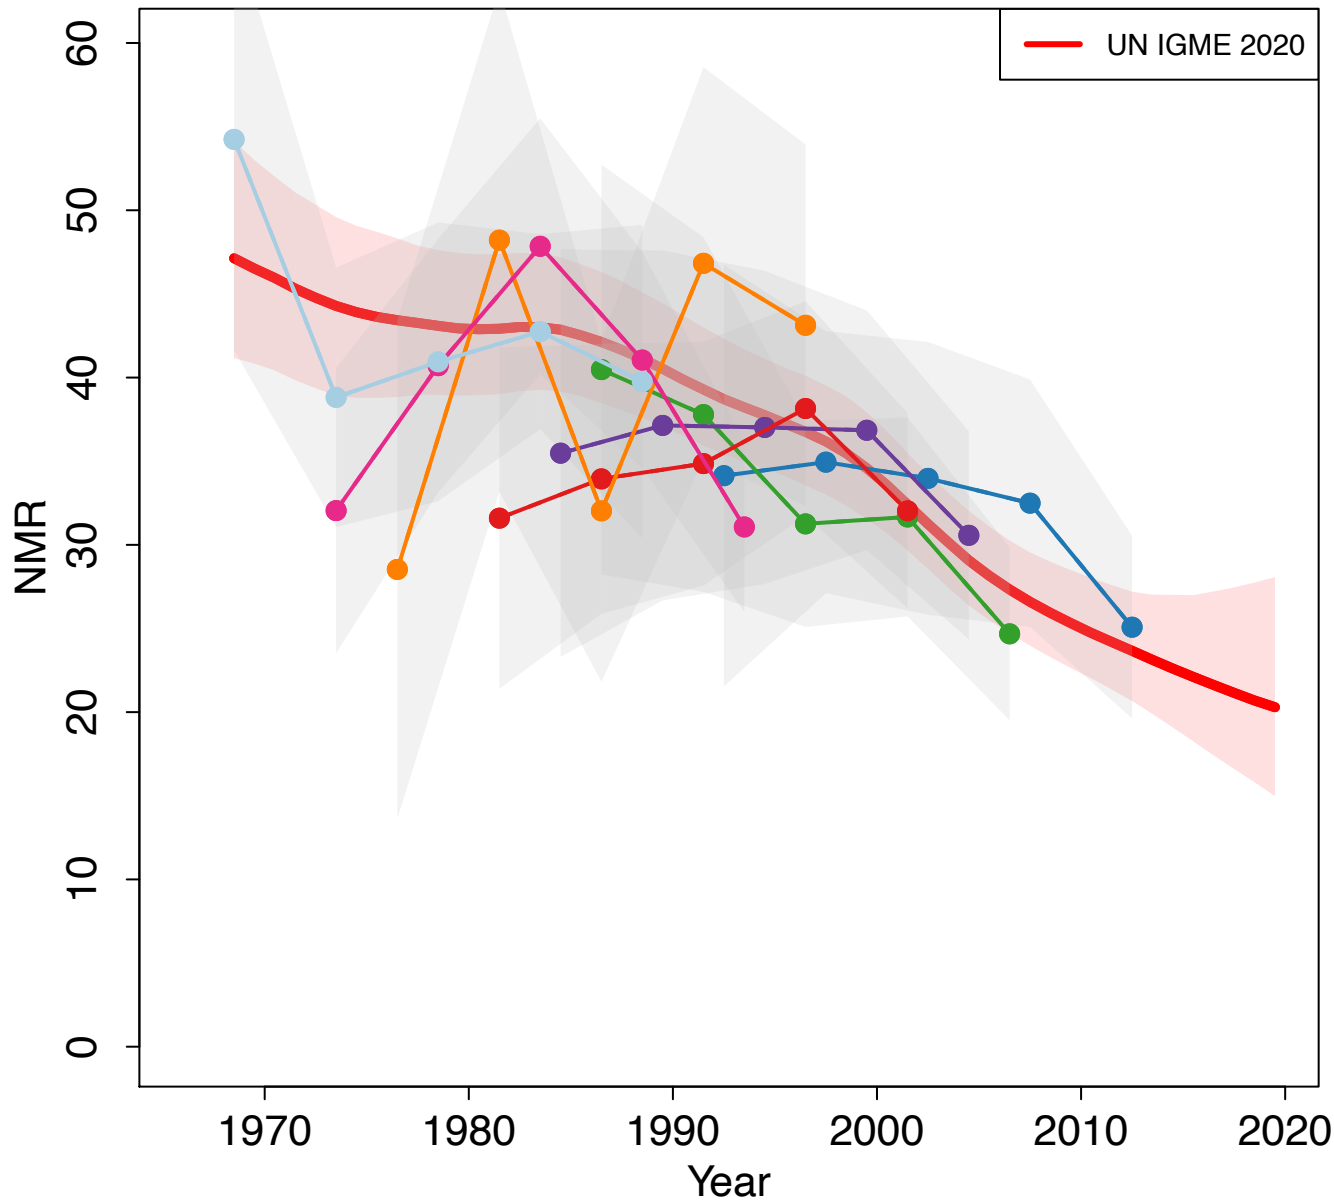

# Zoomed in

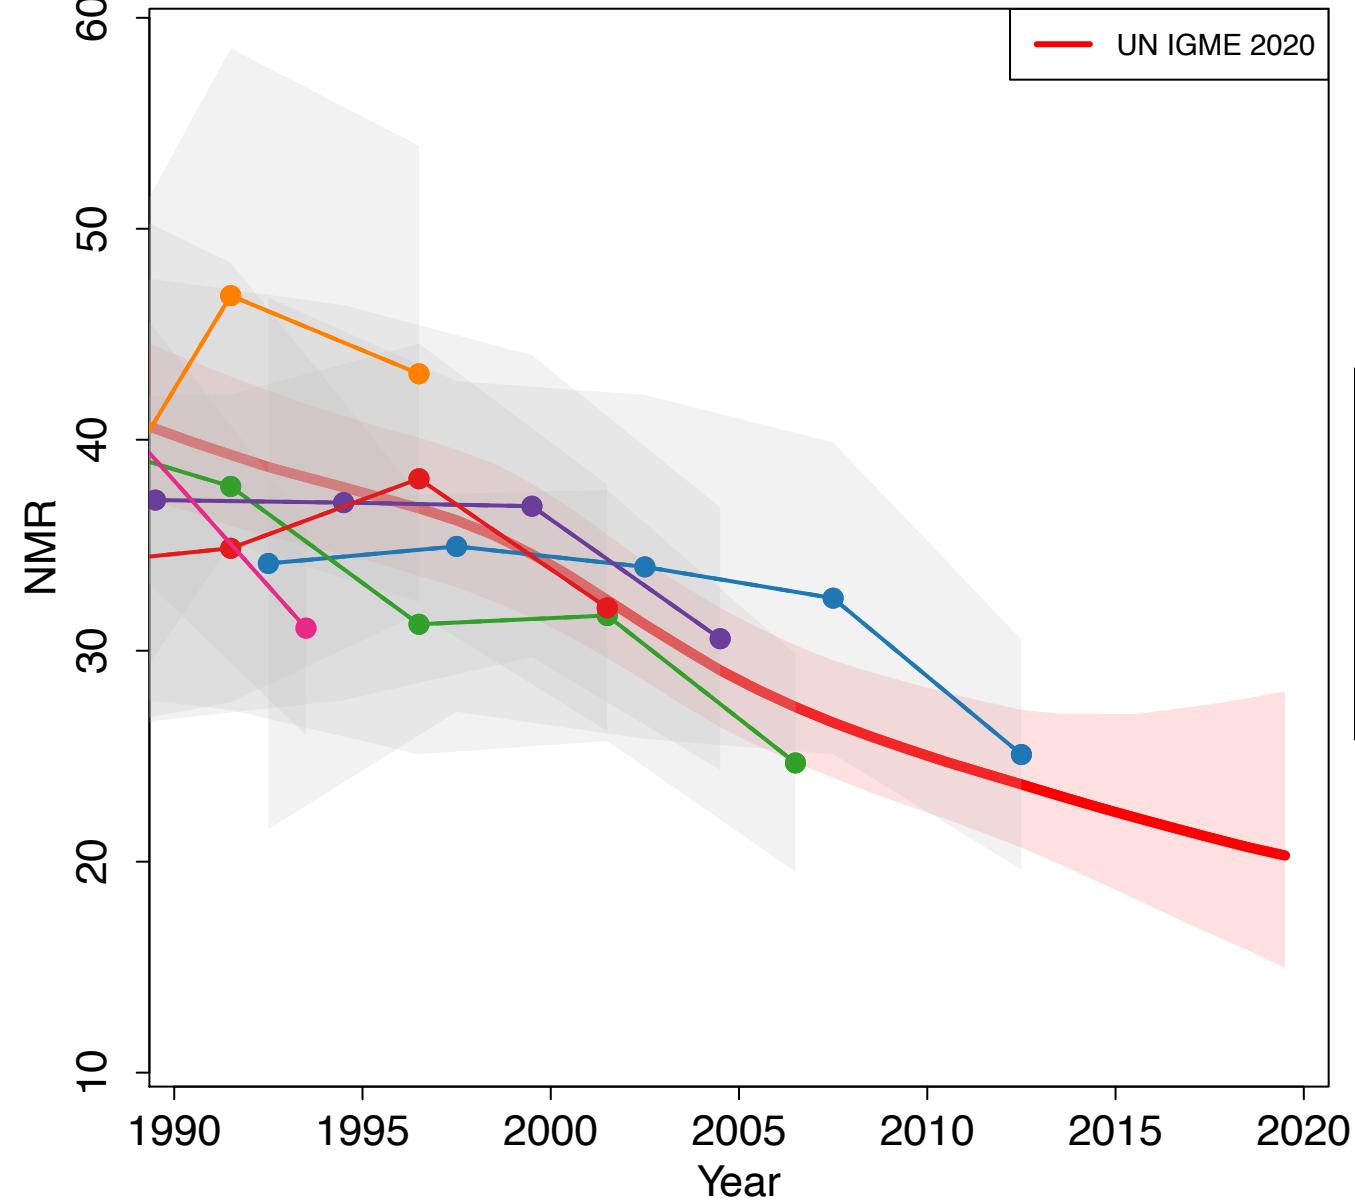

# Thailand

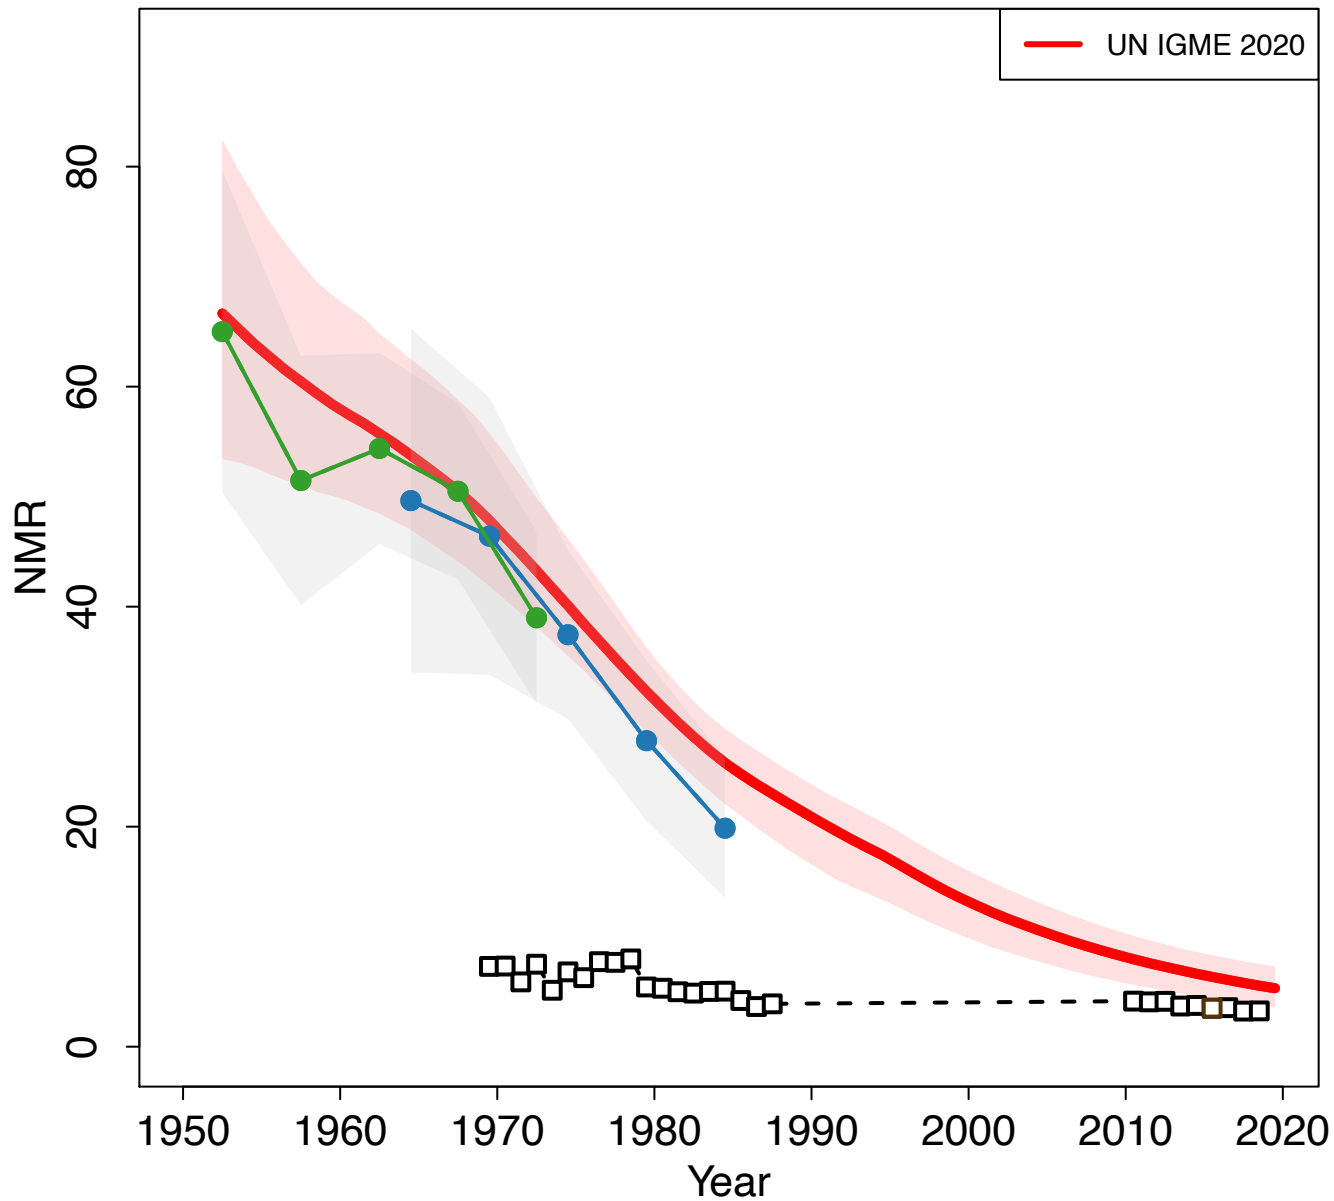

# Zoomed in

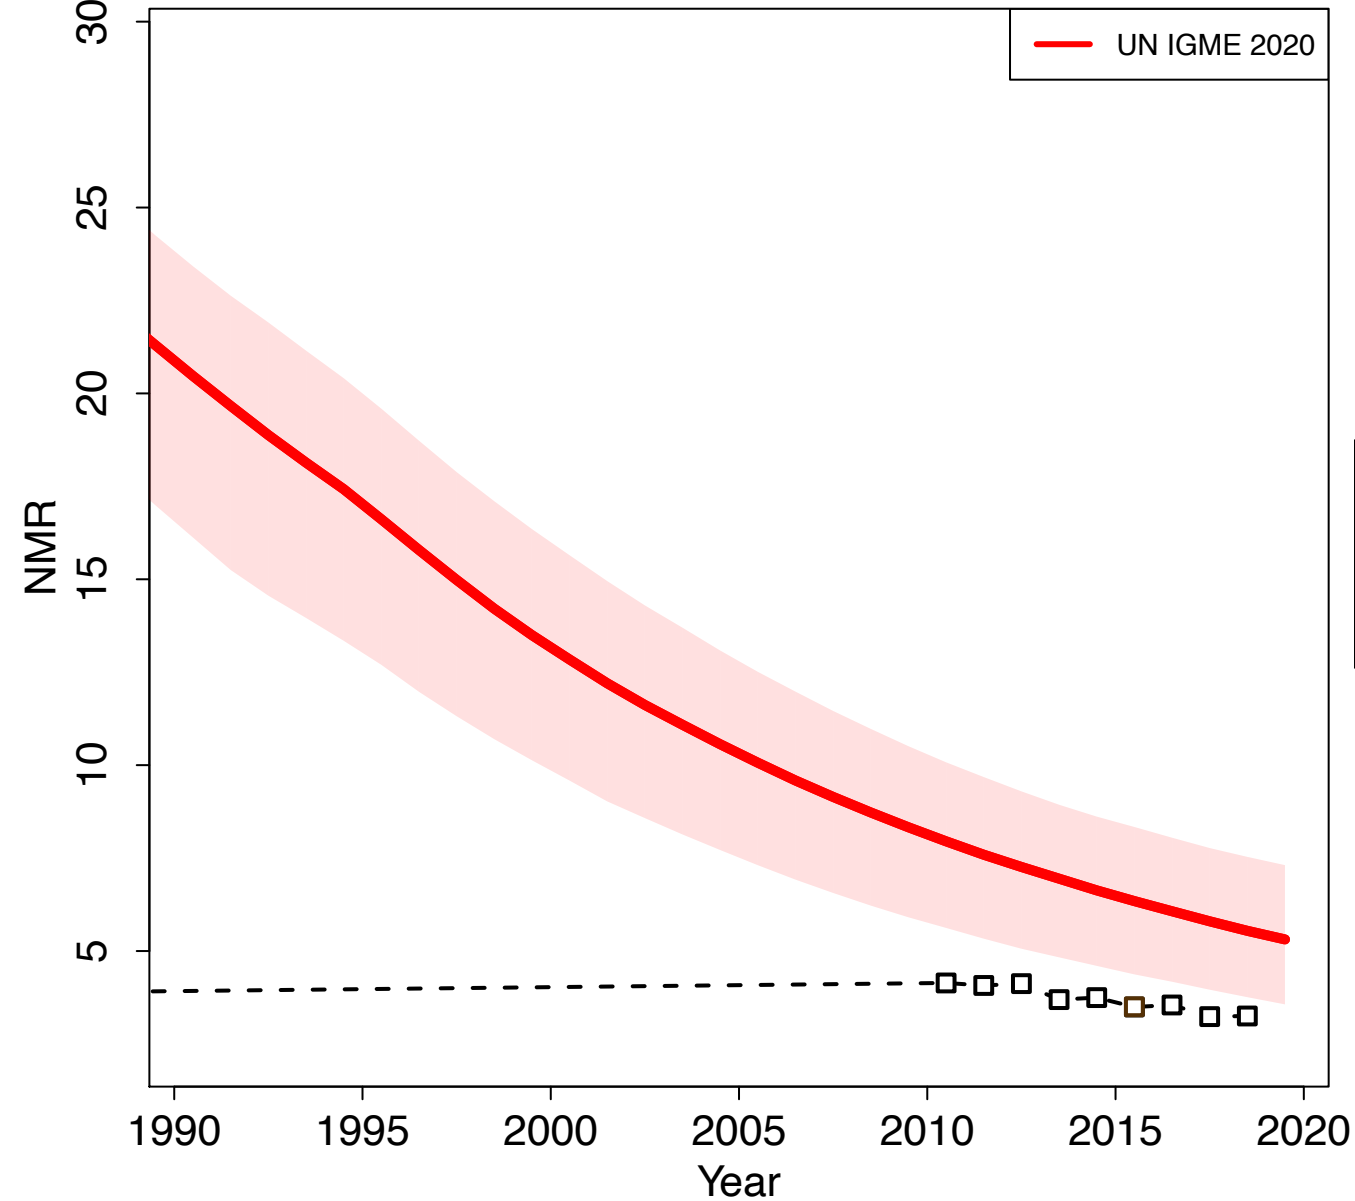

# Timor-Leste

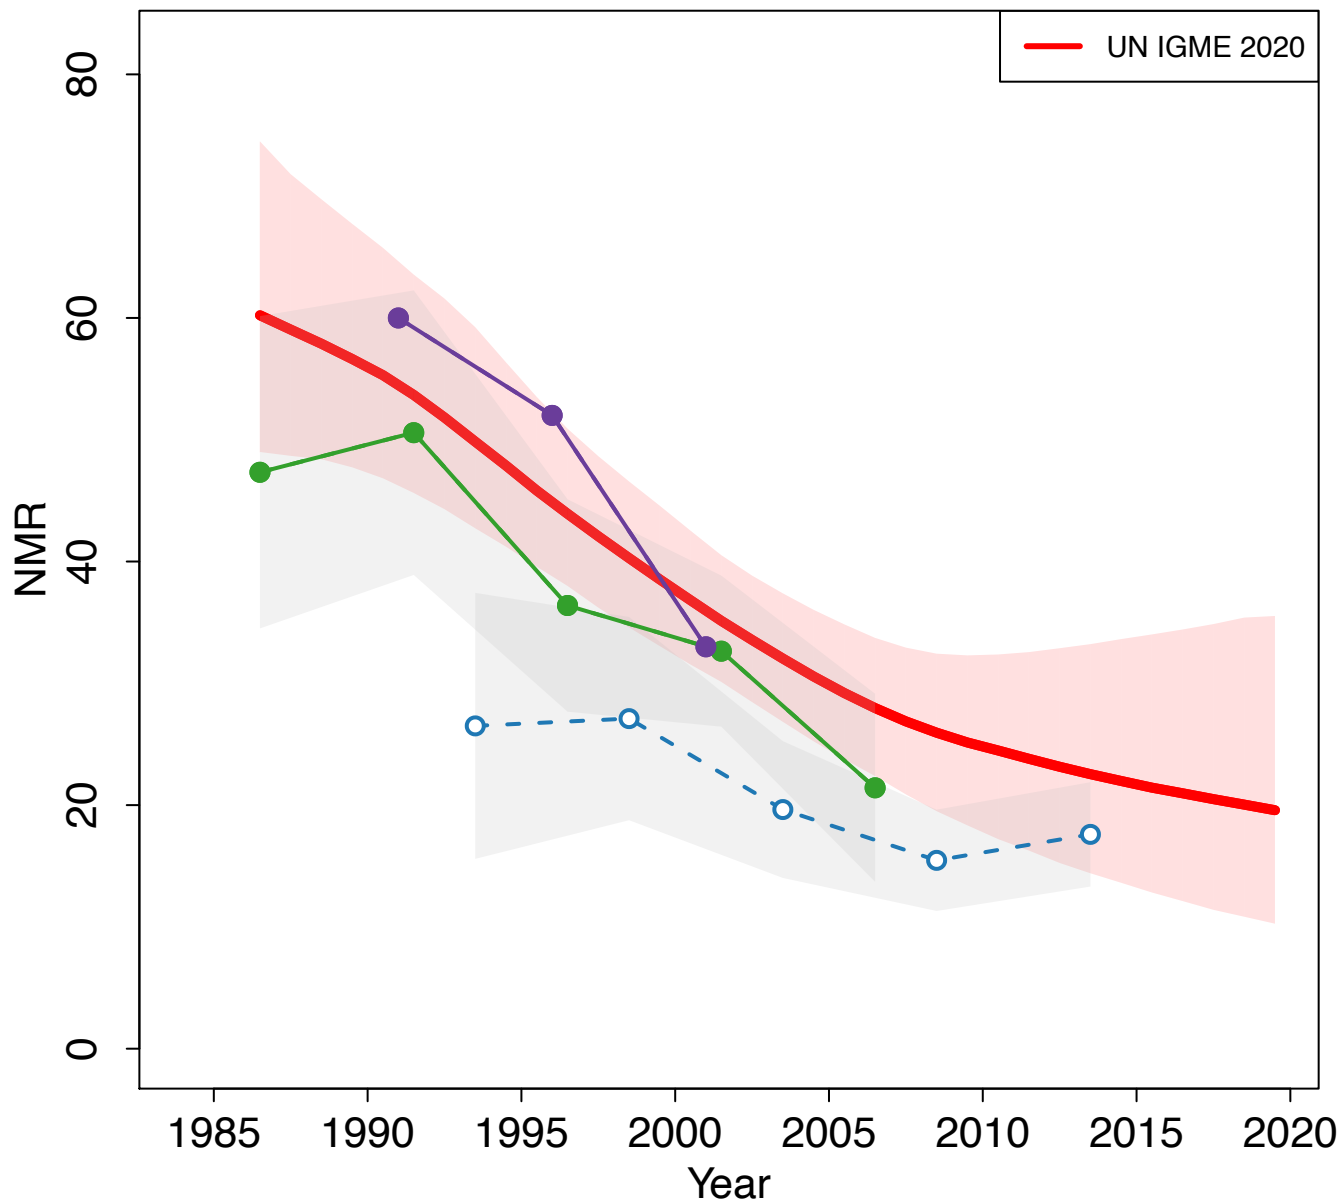

# Zoomed in

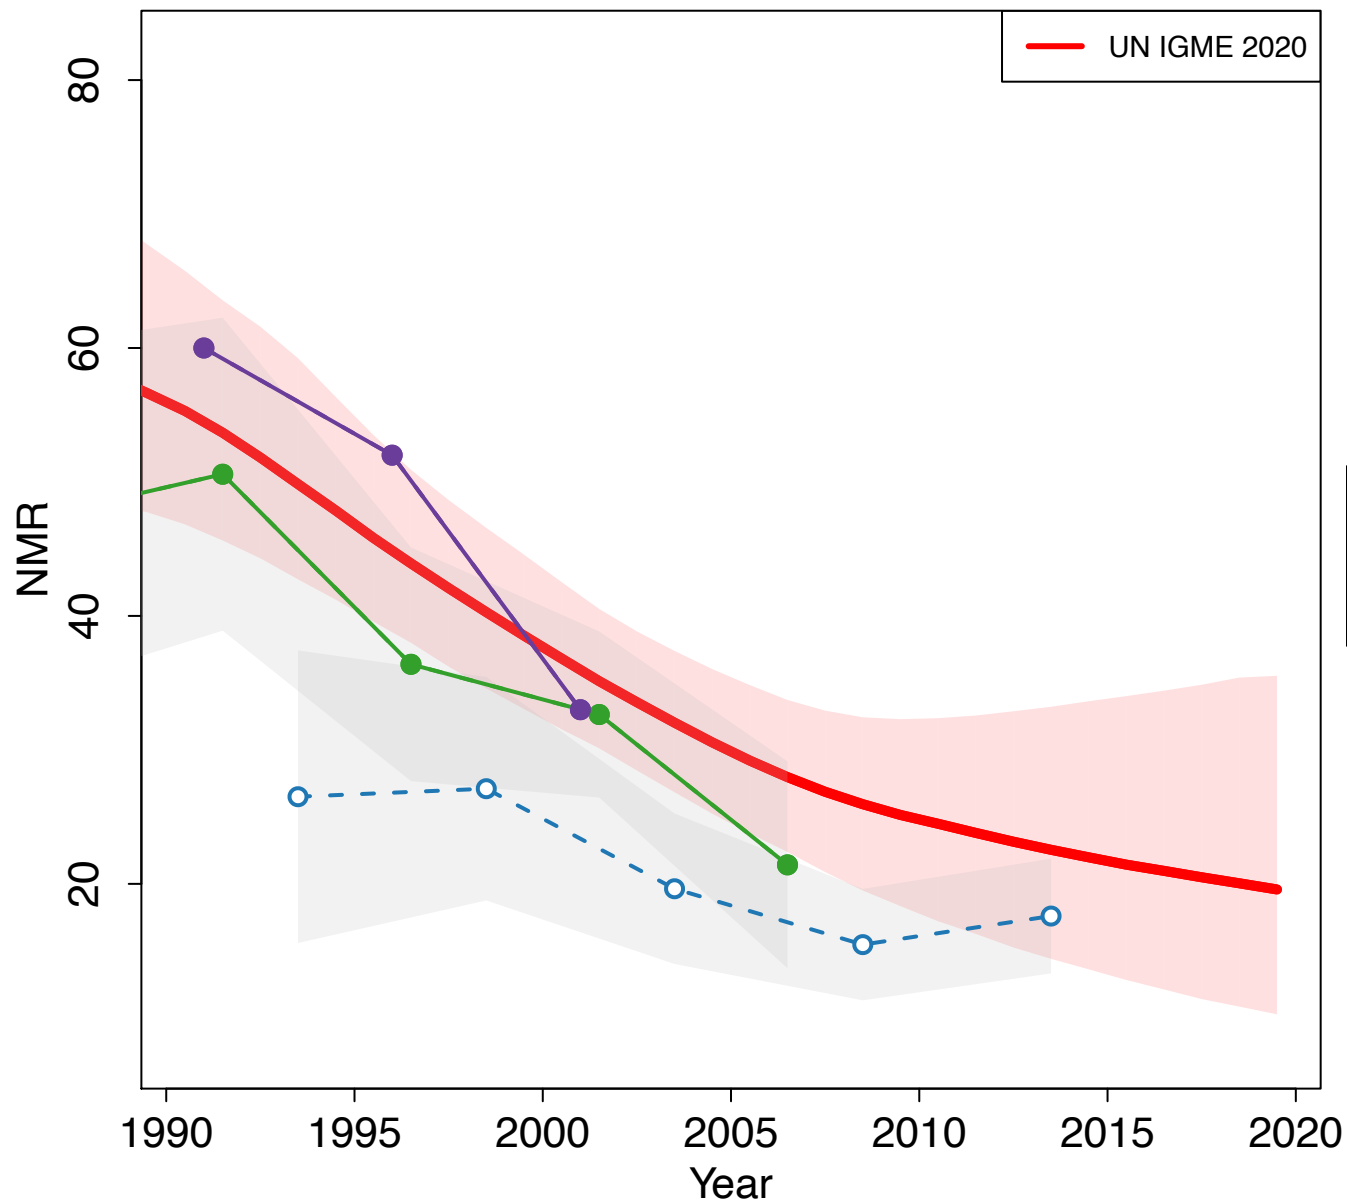

# Togo

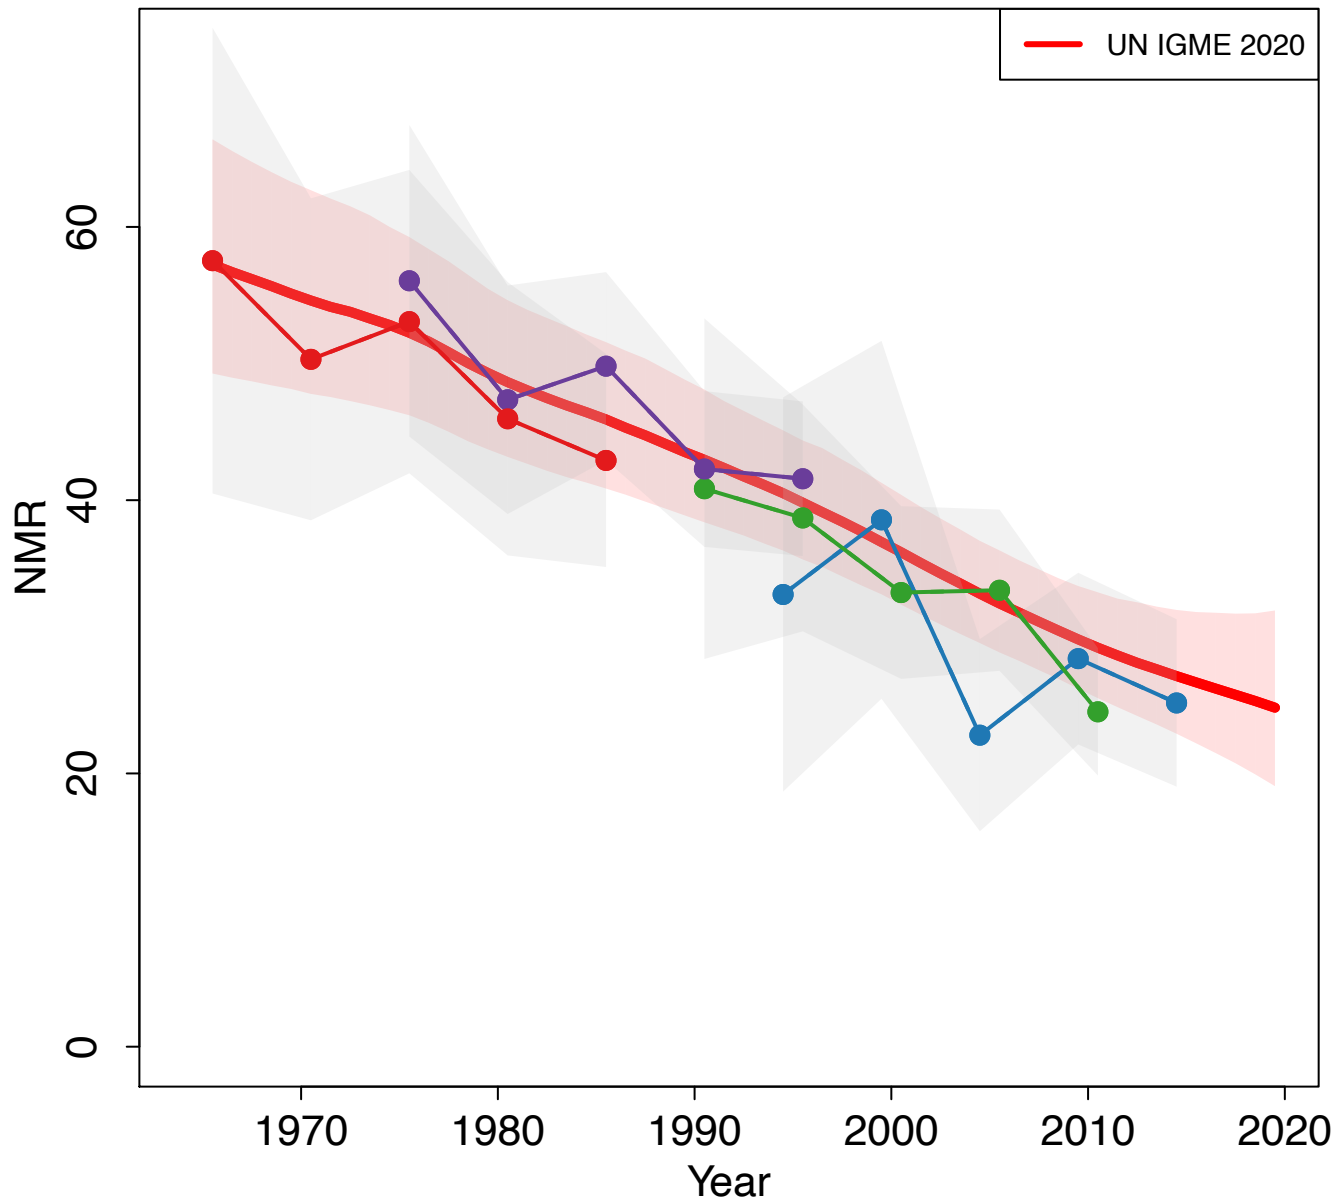

# Zoomed in

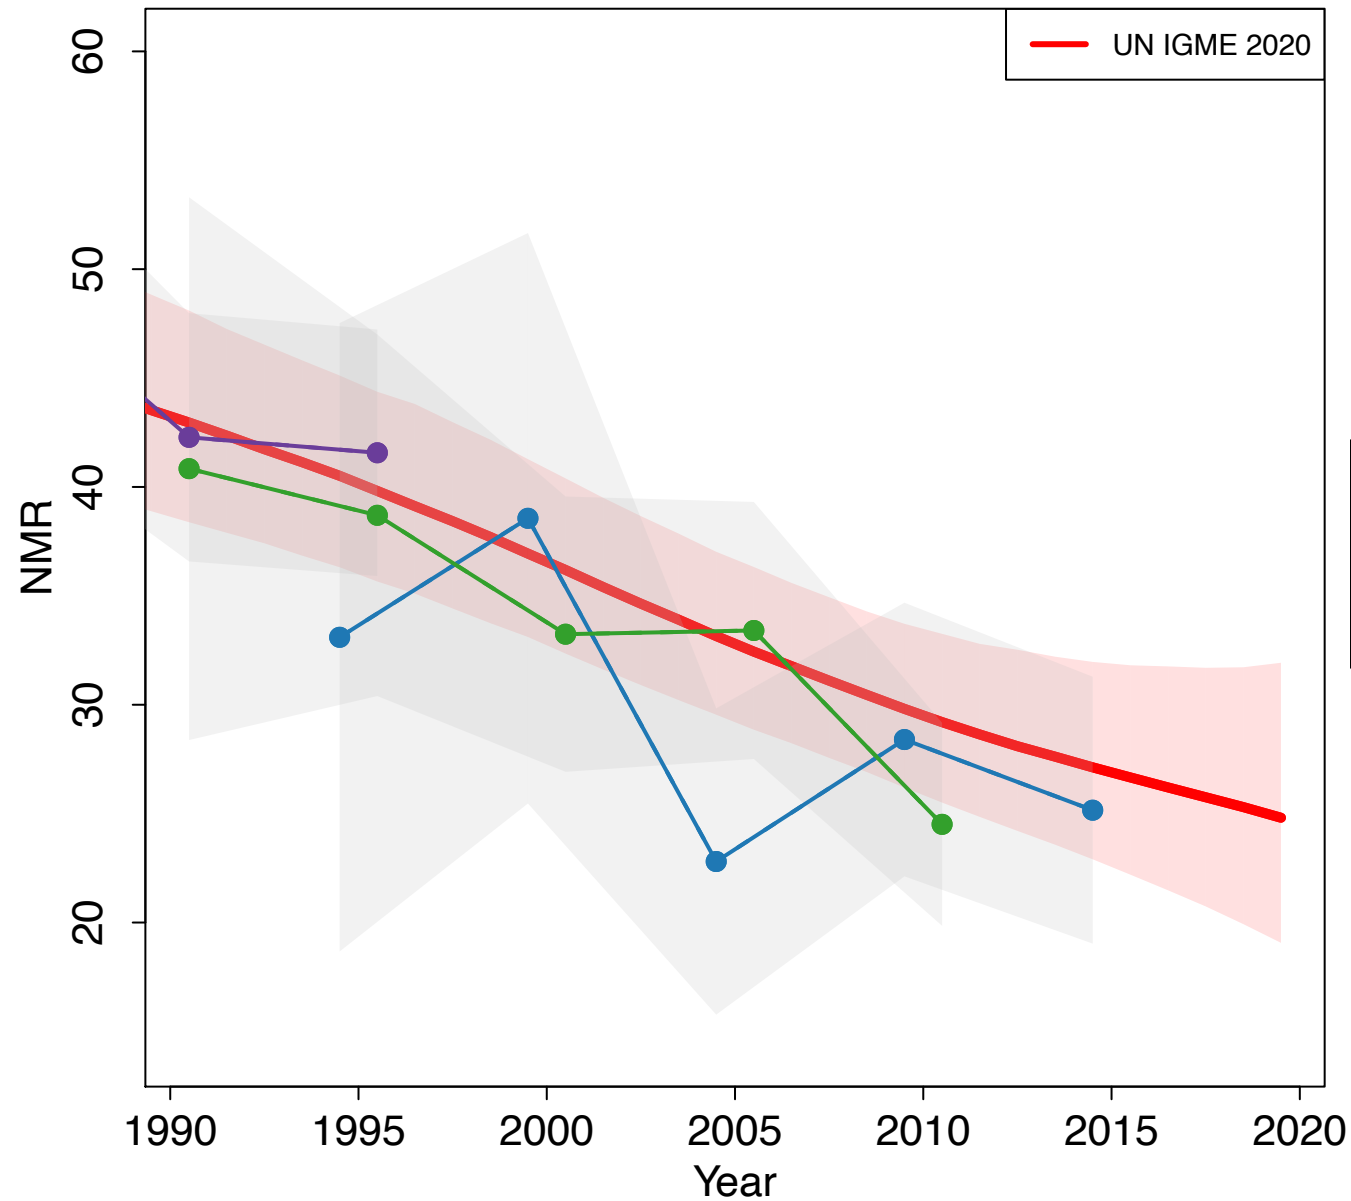

- Demographic and Health Survey 1988 (DHS)
- Demographic and Health Survey 1998 (DHS)
- Demographic and Health Survey 2013-2014 (DHS)
- Multiple Indicator Cluster Survey 2017 (MICS)

# Tonga

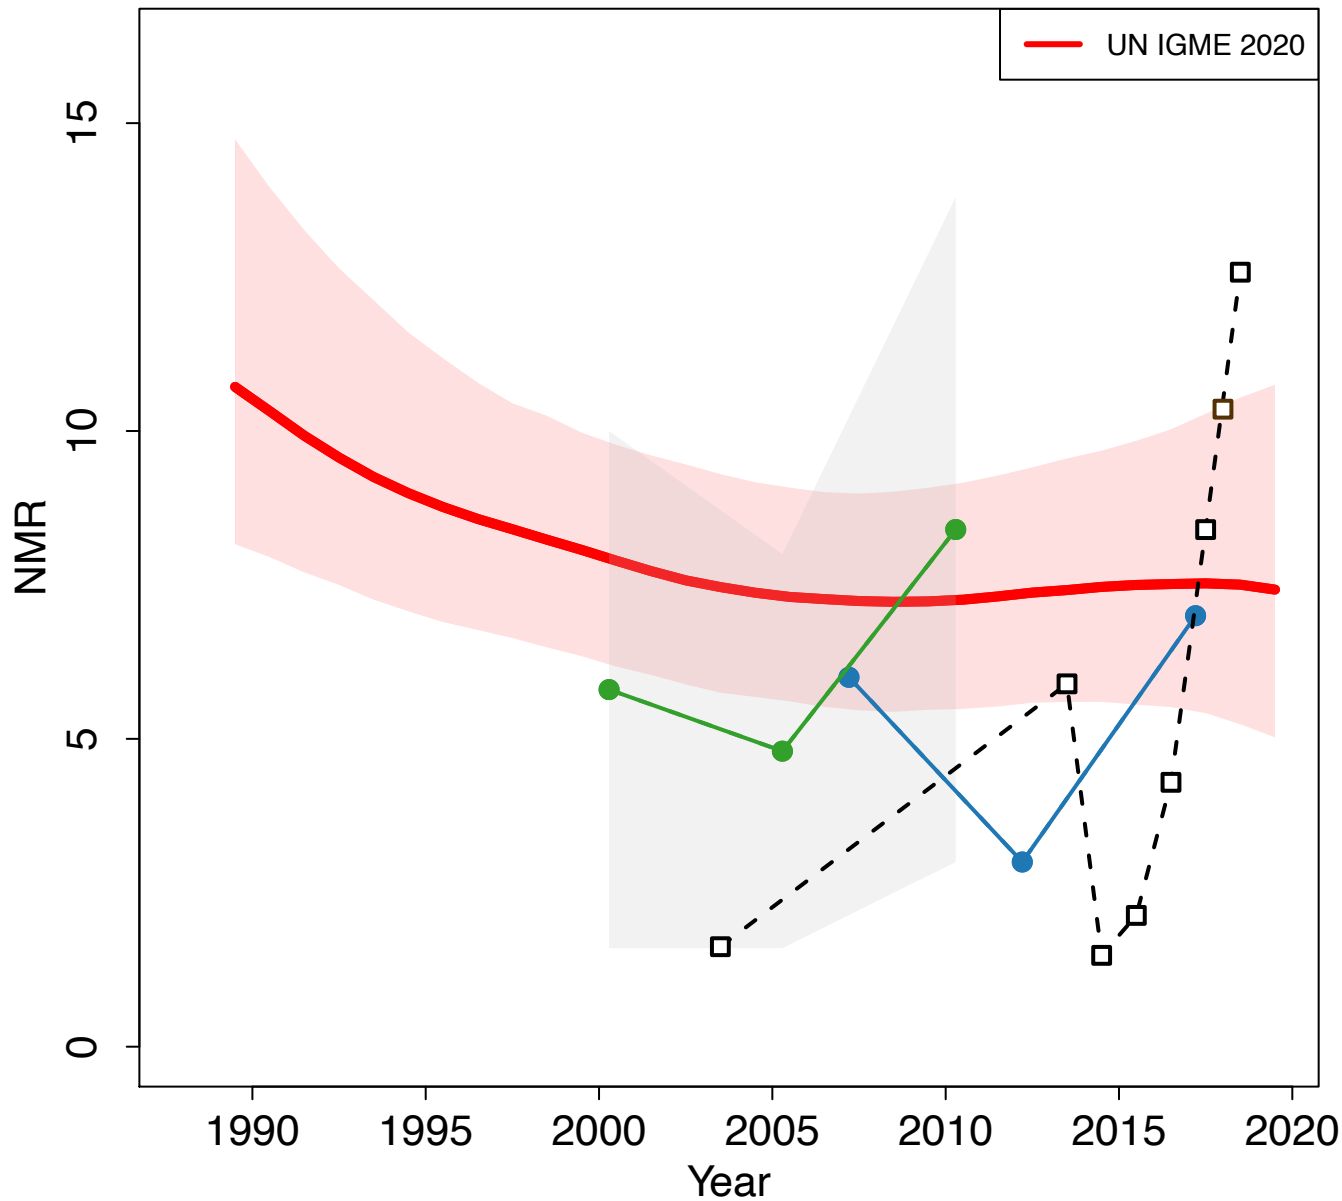

# Zoomed in

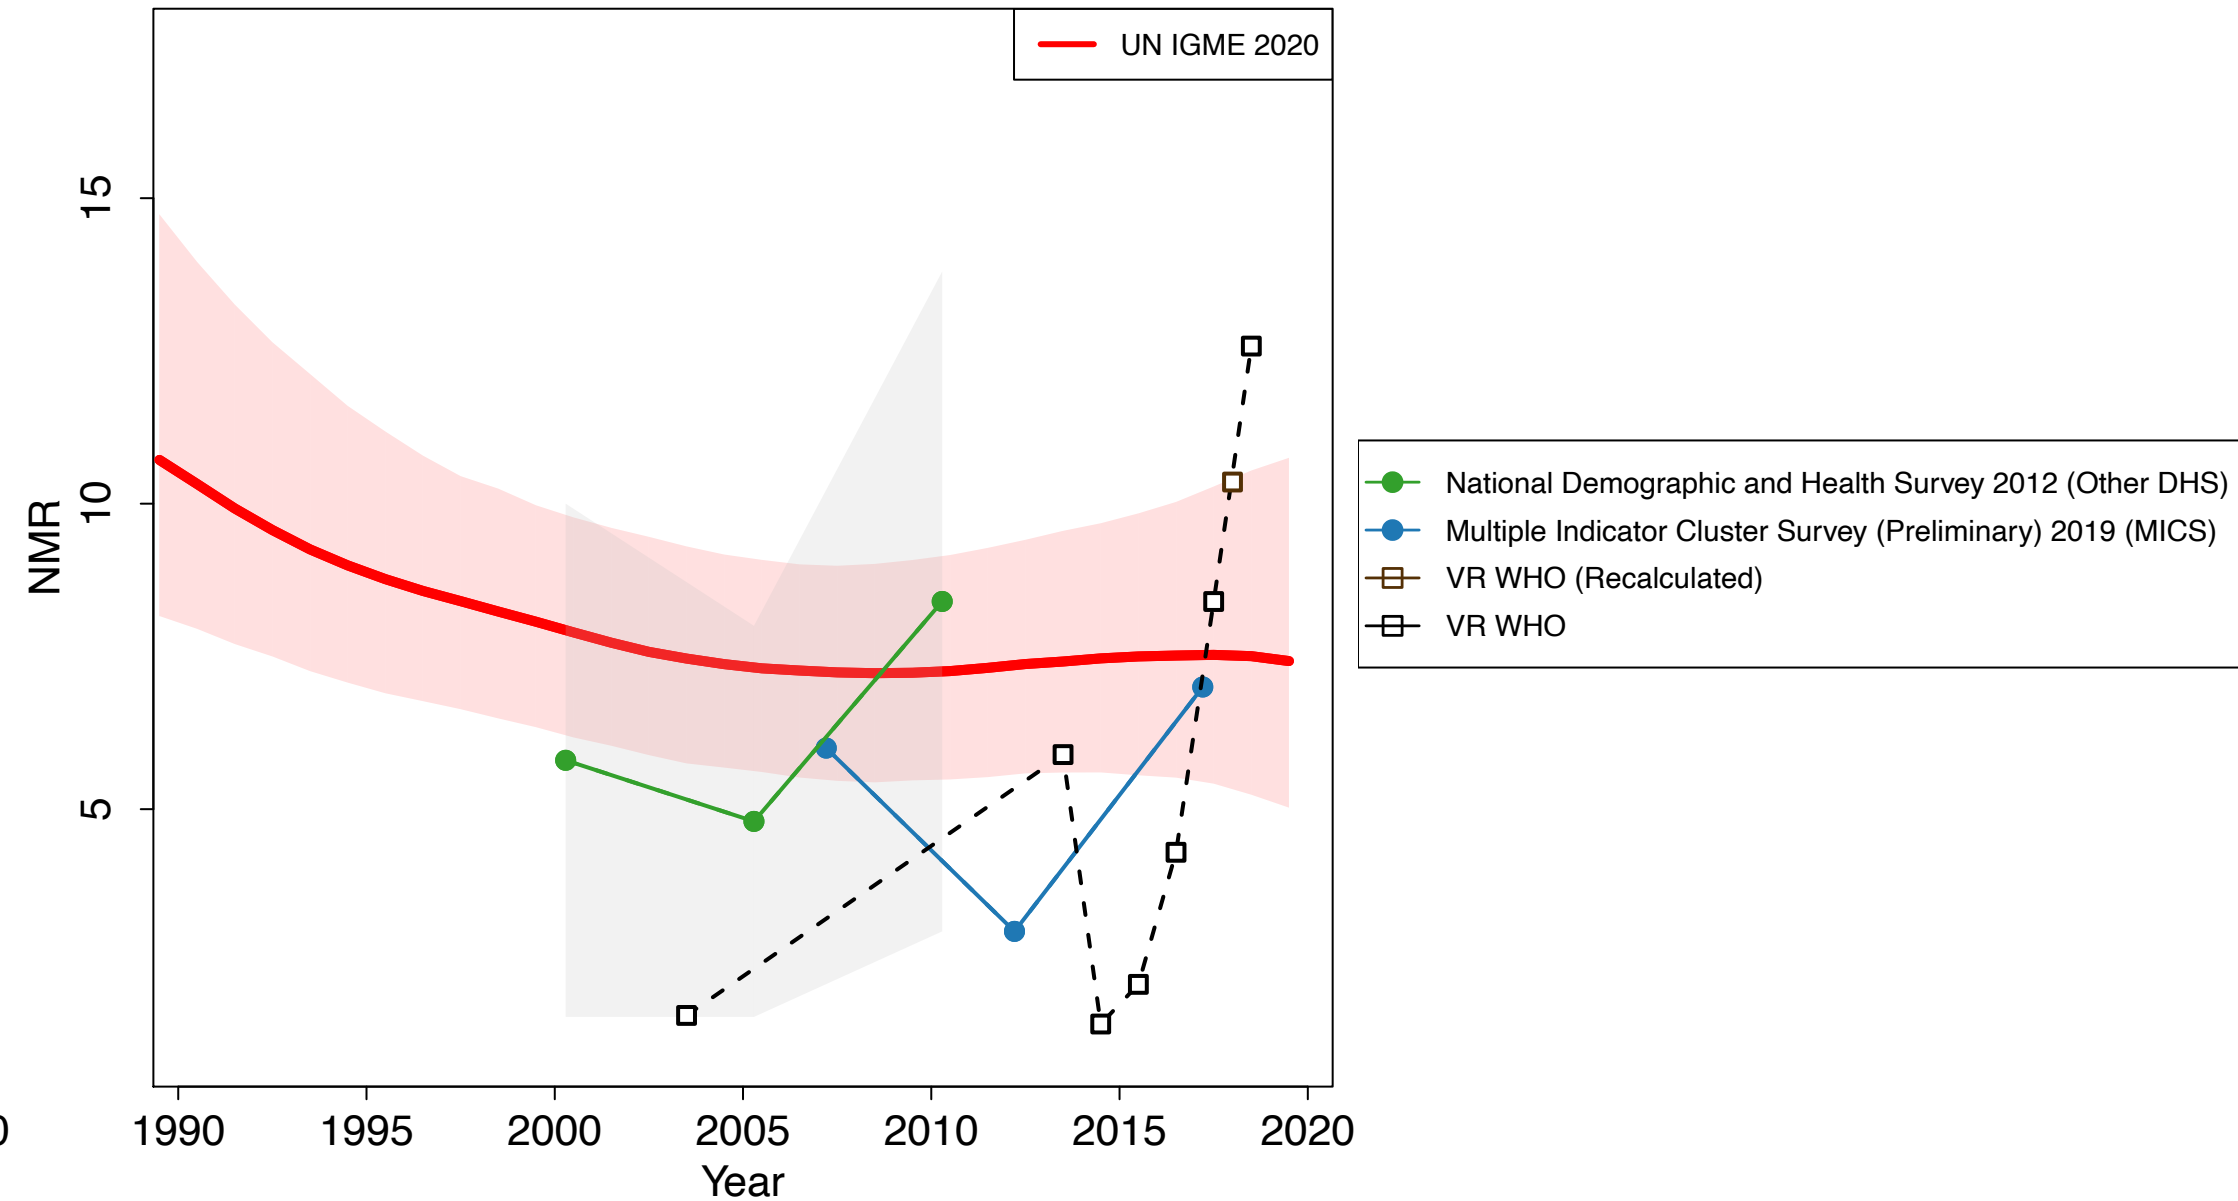

# Trinidad and Tobago

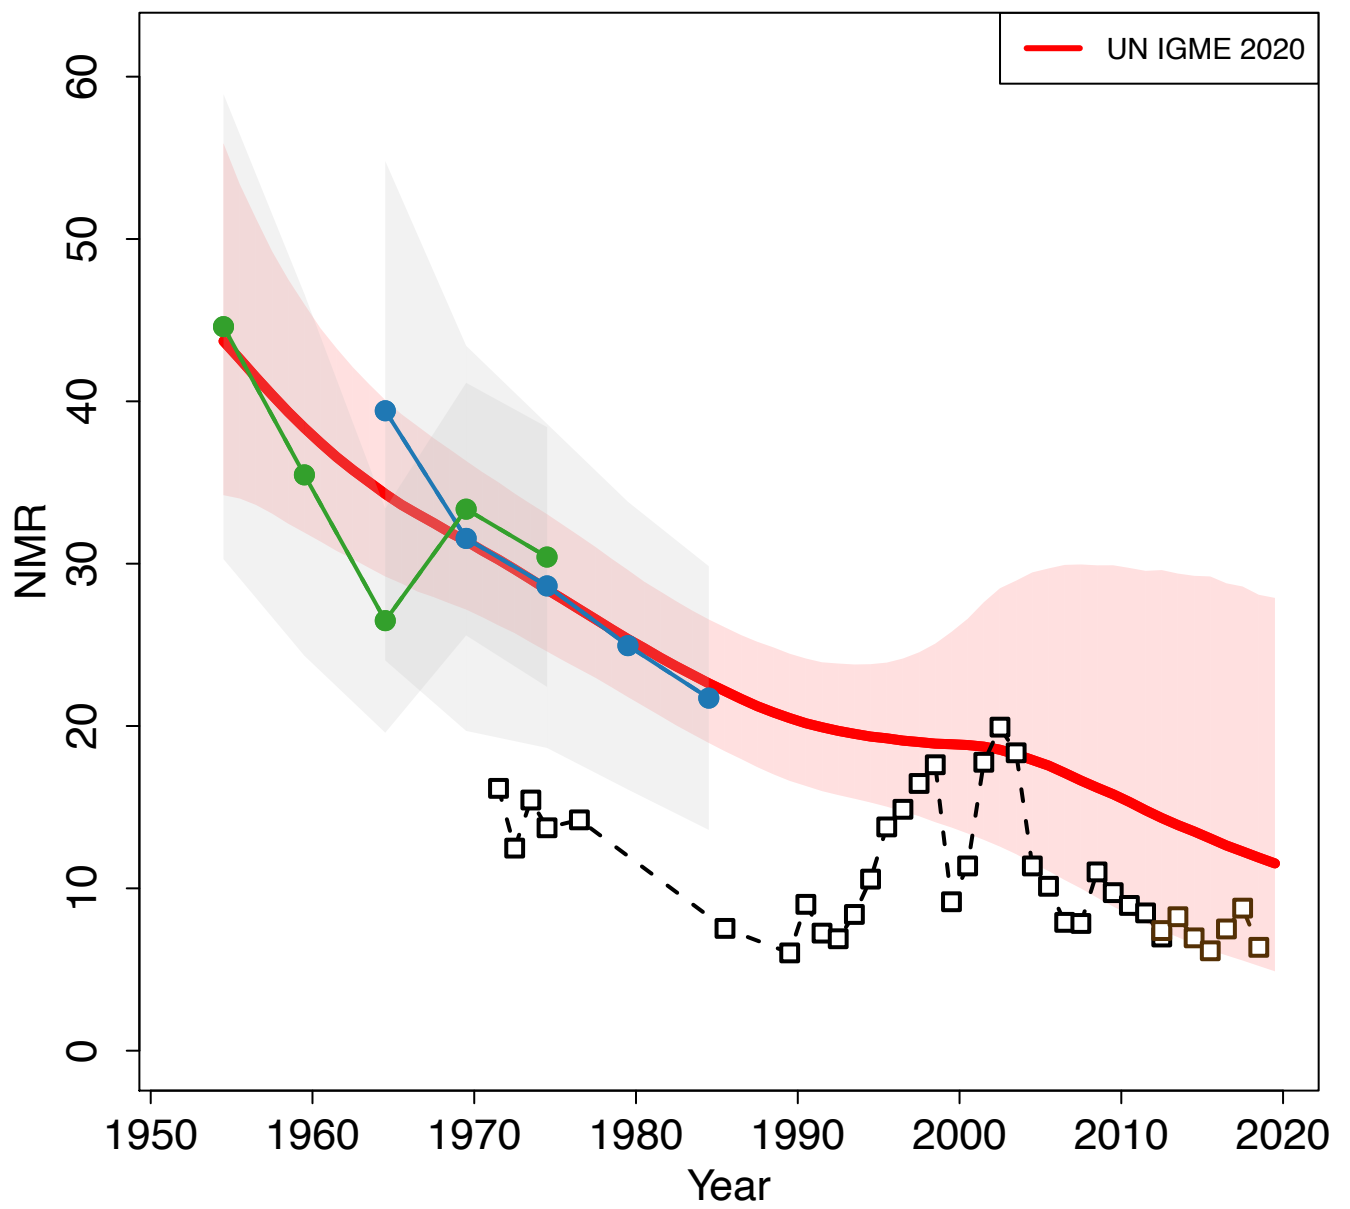

# Zoomed in

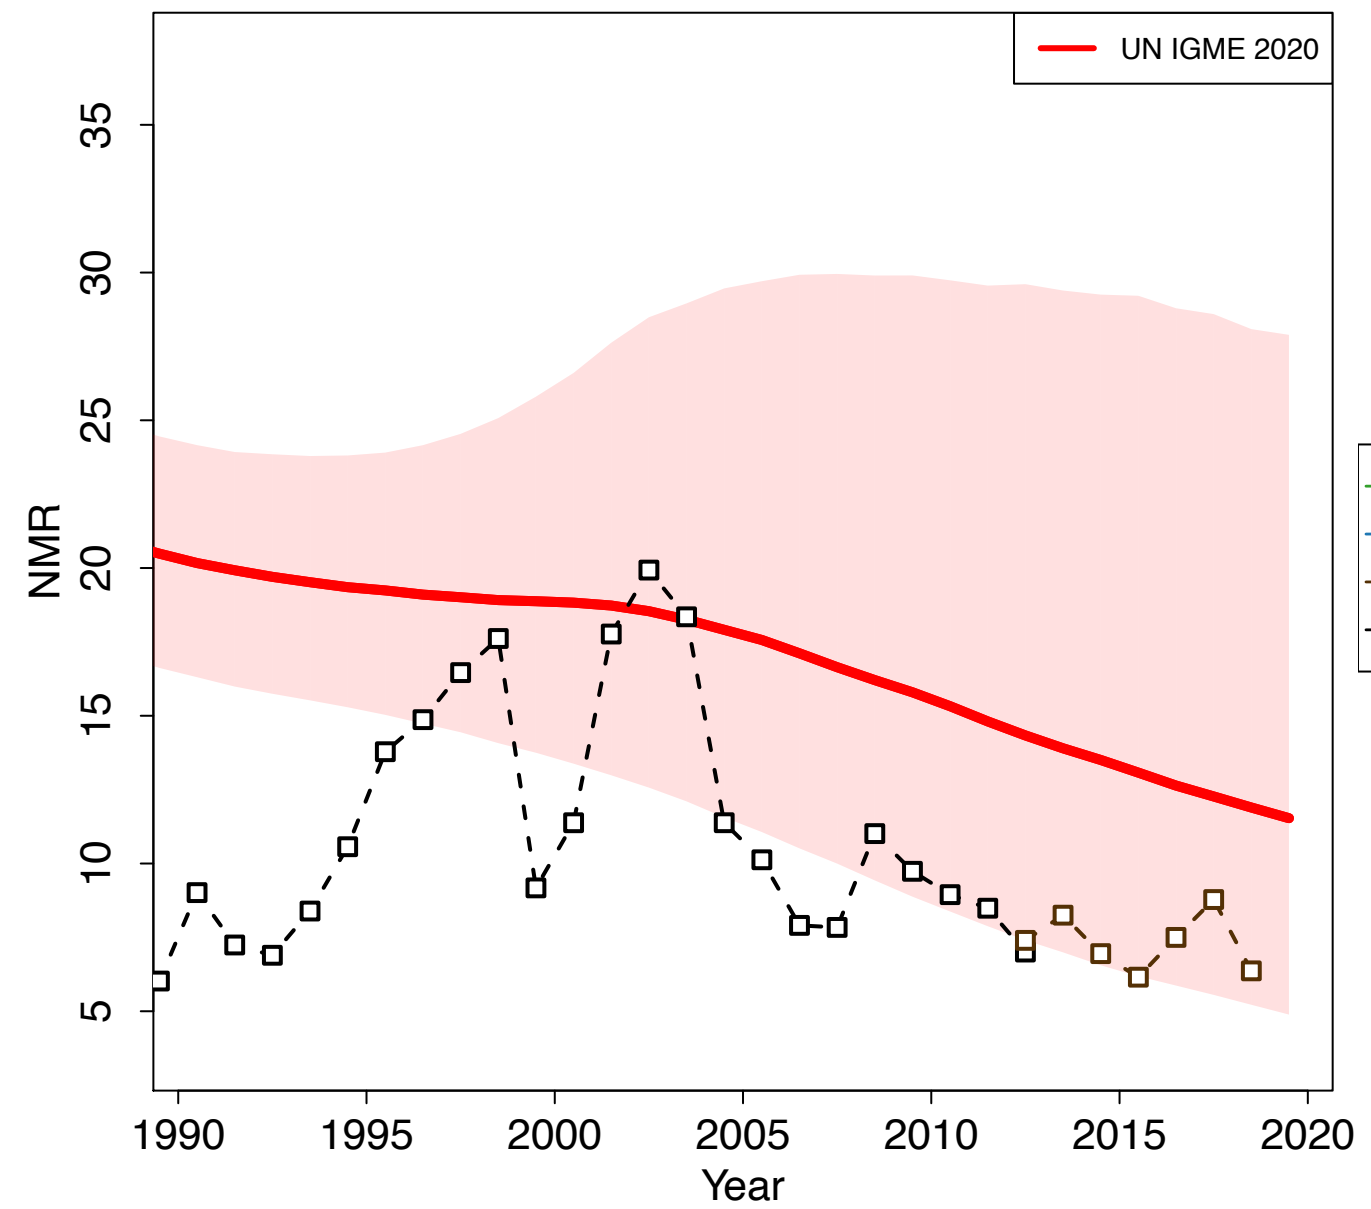

# Tunisia

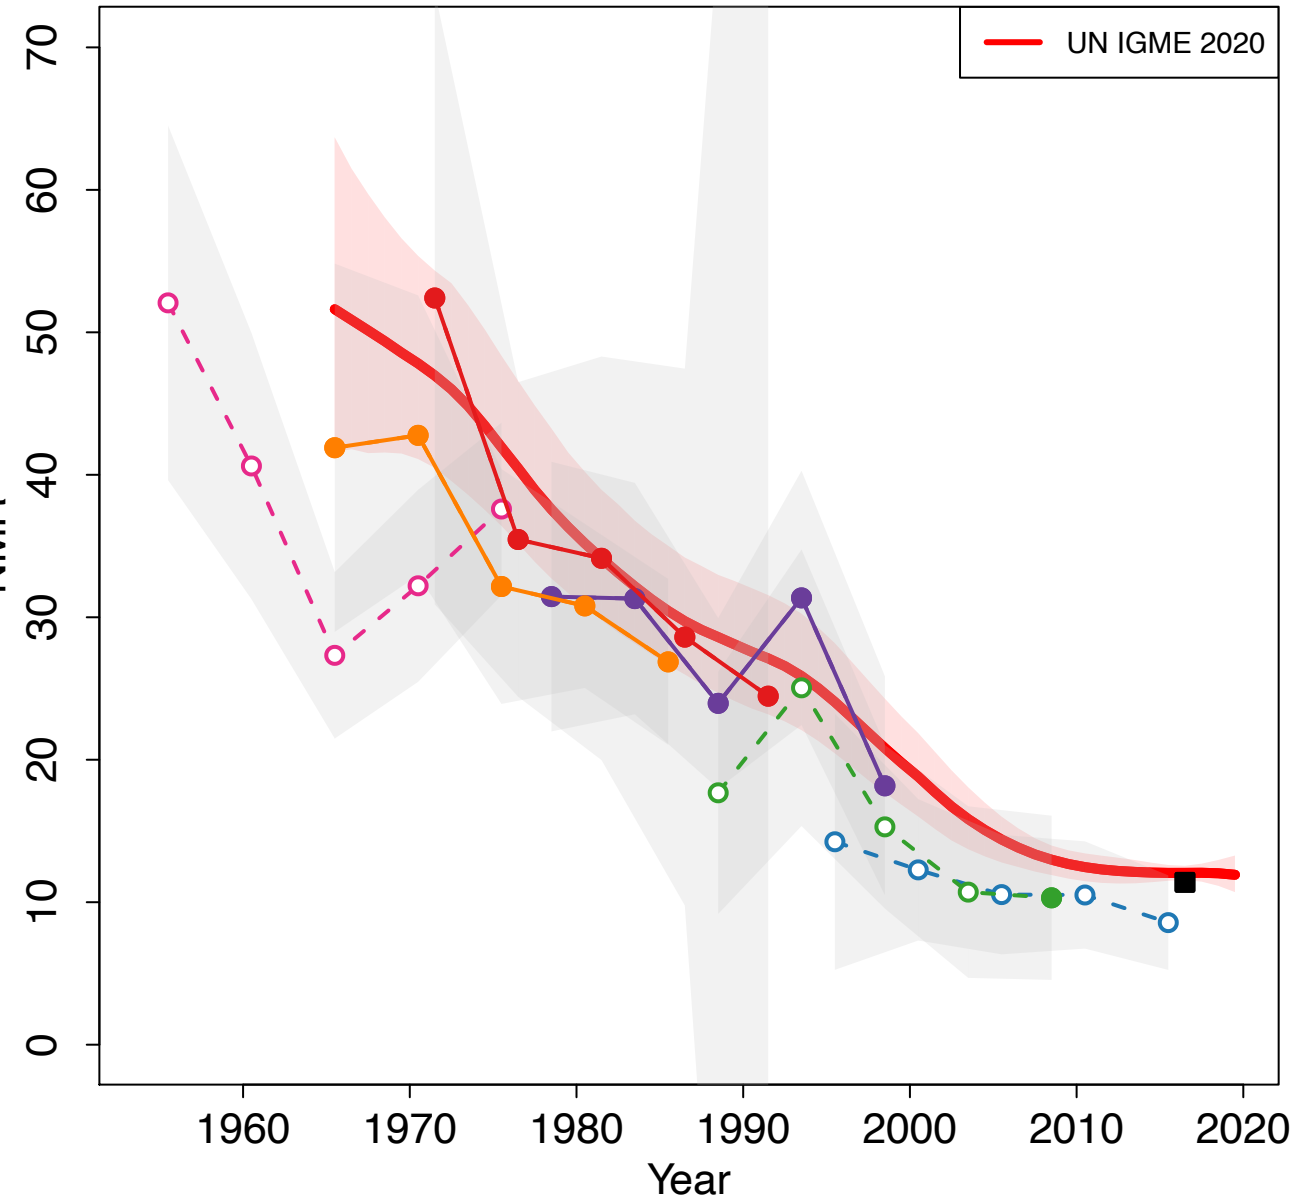

# Zoomed in

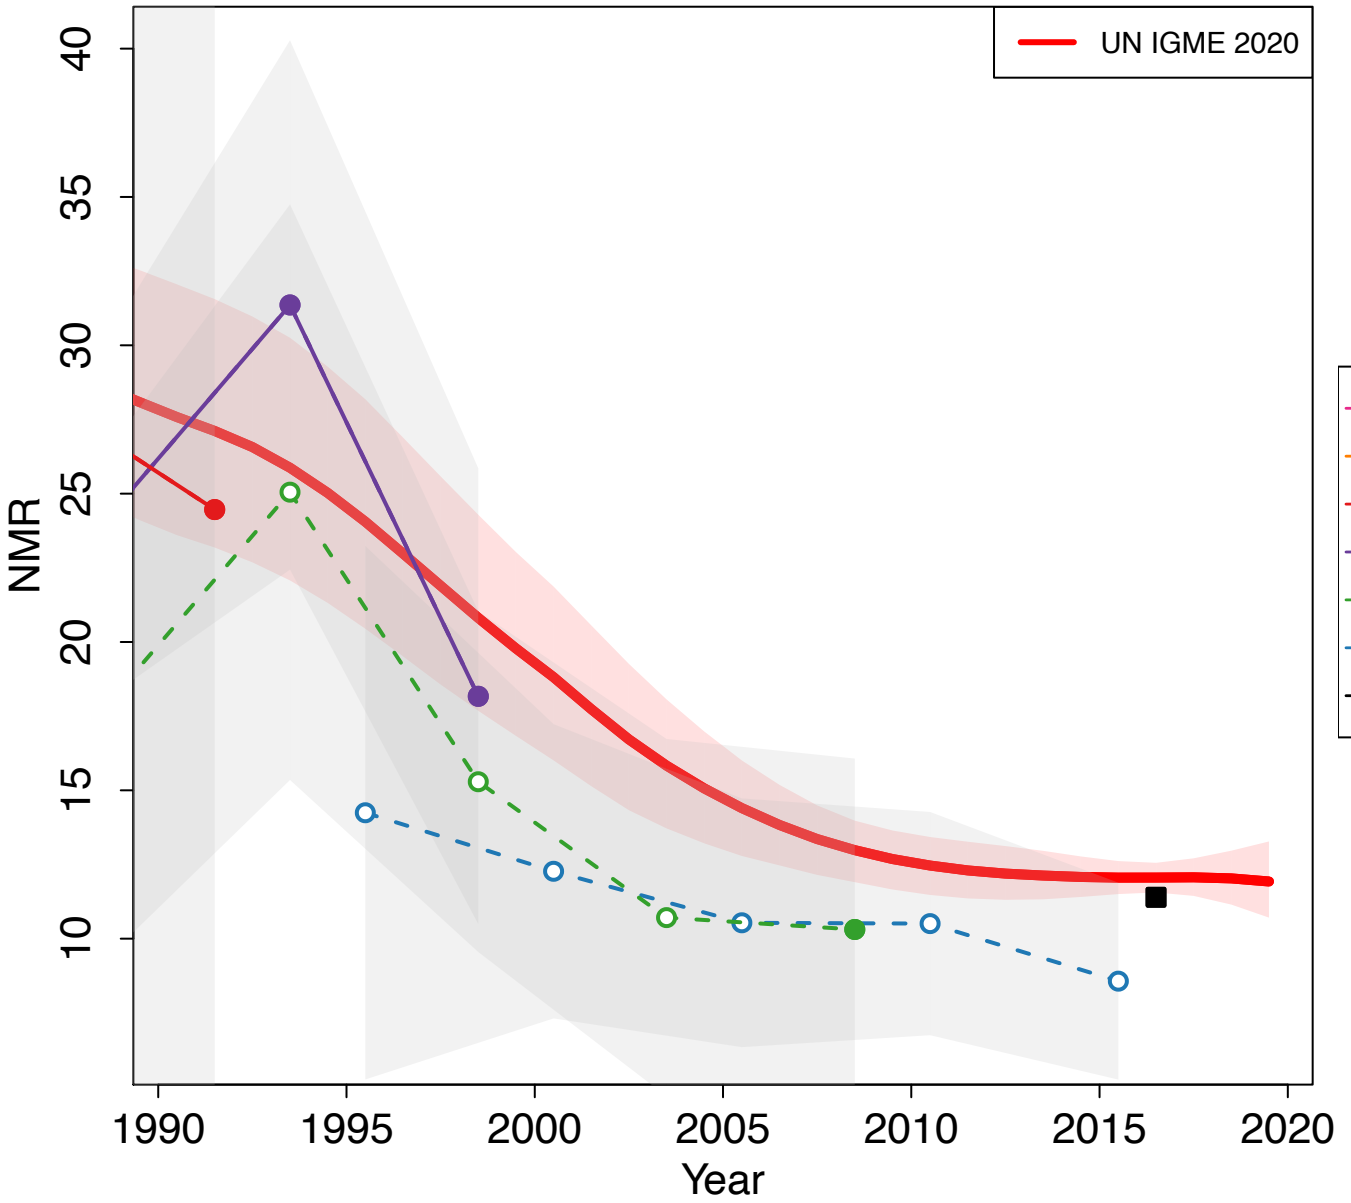

- World Fertility Survey 1978 (Other DHS)
- Demographic and Health Survey 1988 (DHS)
- PAPCHILD Maternal and Child Health Survey 1994 (Others)
- PAPFAM Family Health Survey 2001 (Others)
- Multiple Indicator Cluster Survey 2011–2012 (MICS)
- Multiple Indicator Cluster Survey 2018 (MICS)
- VR WHO



# Turkey

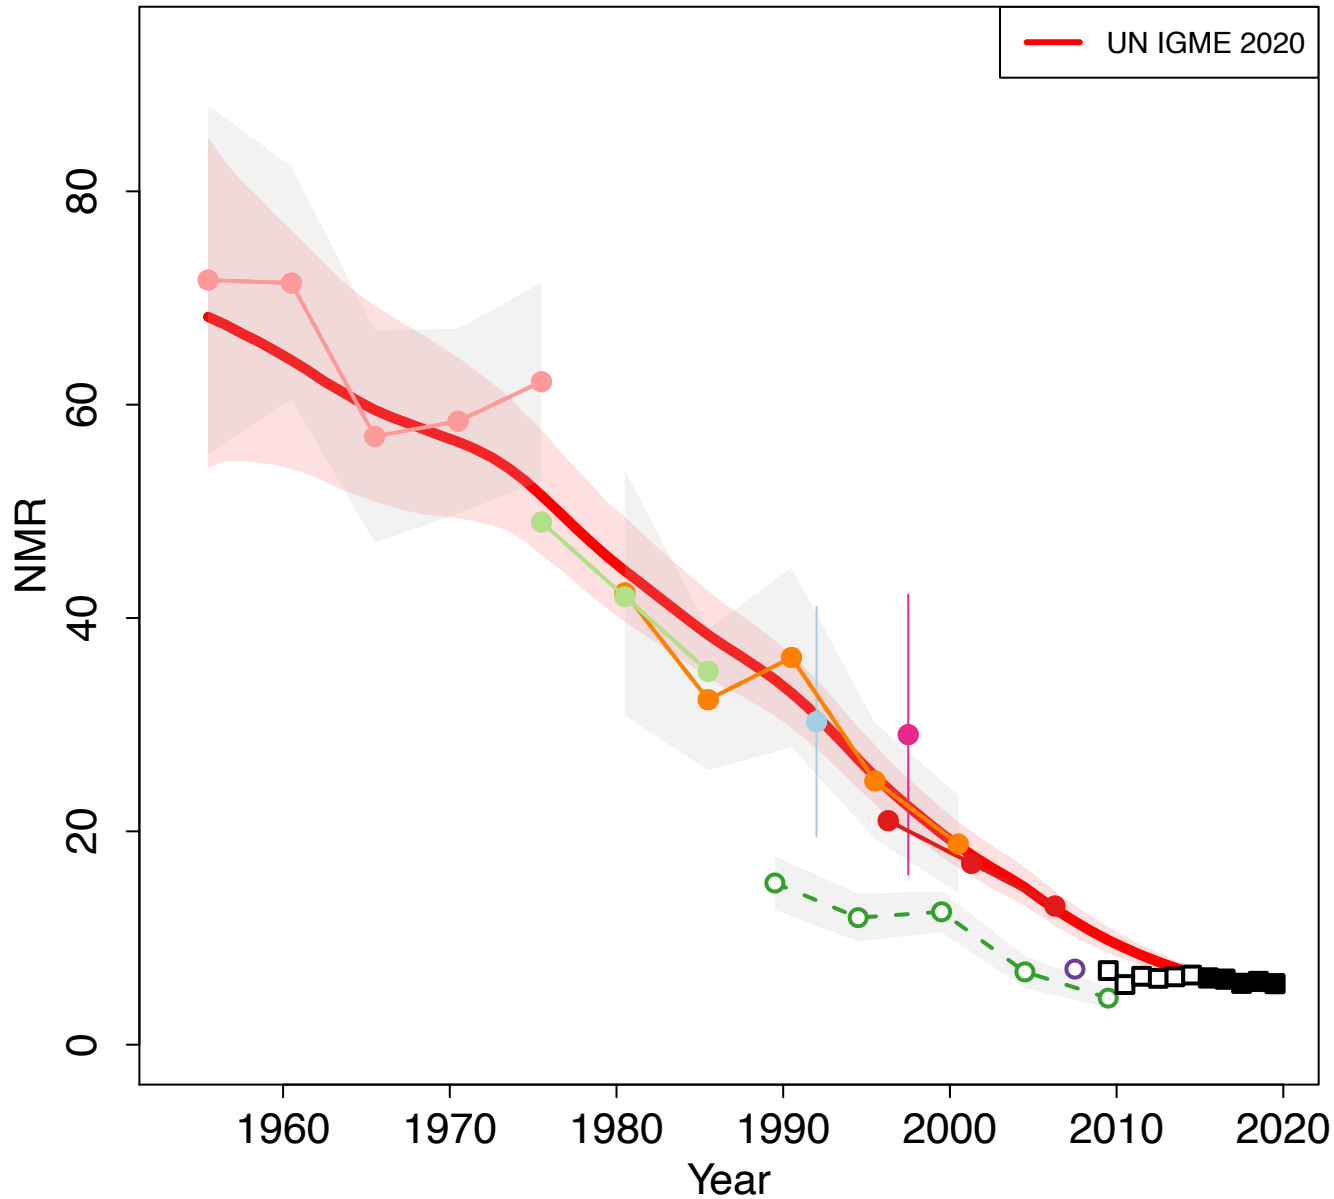

# Zoomed in

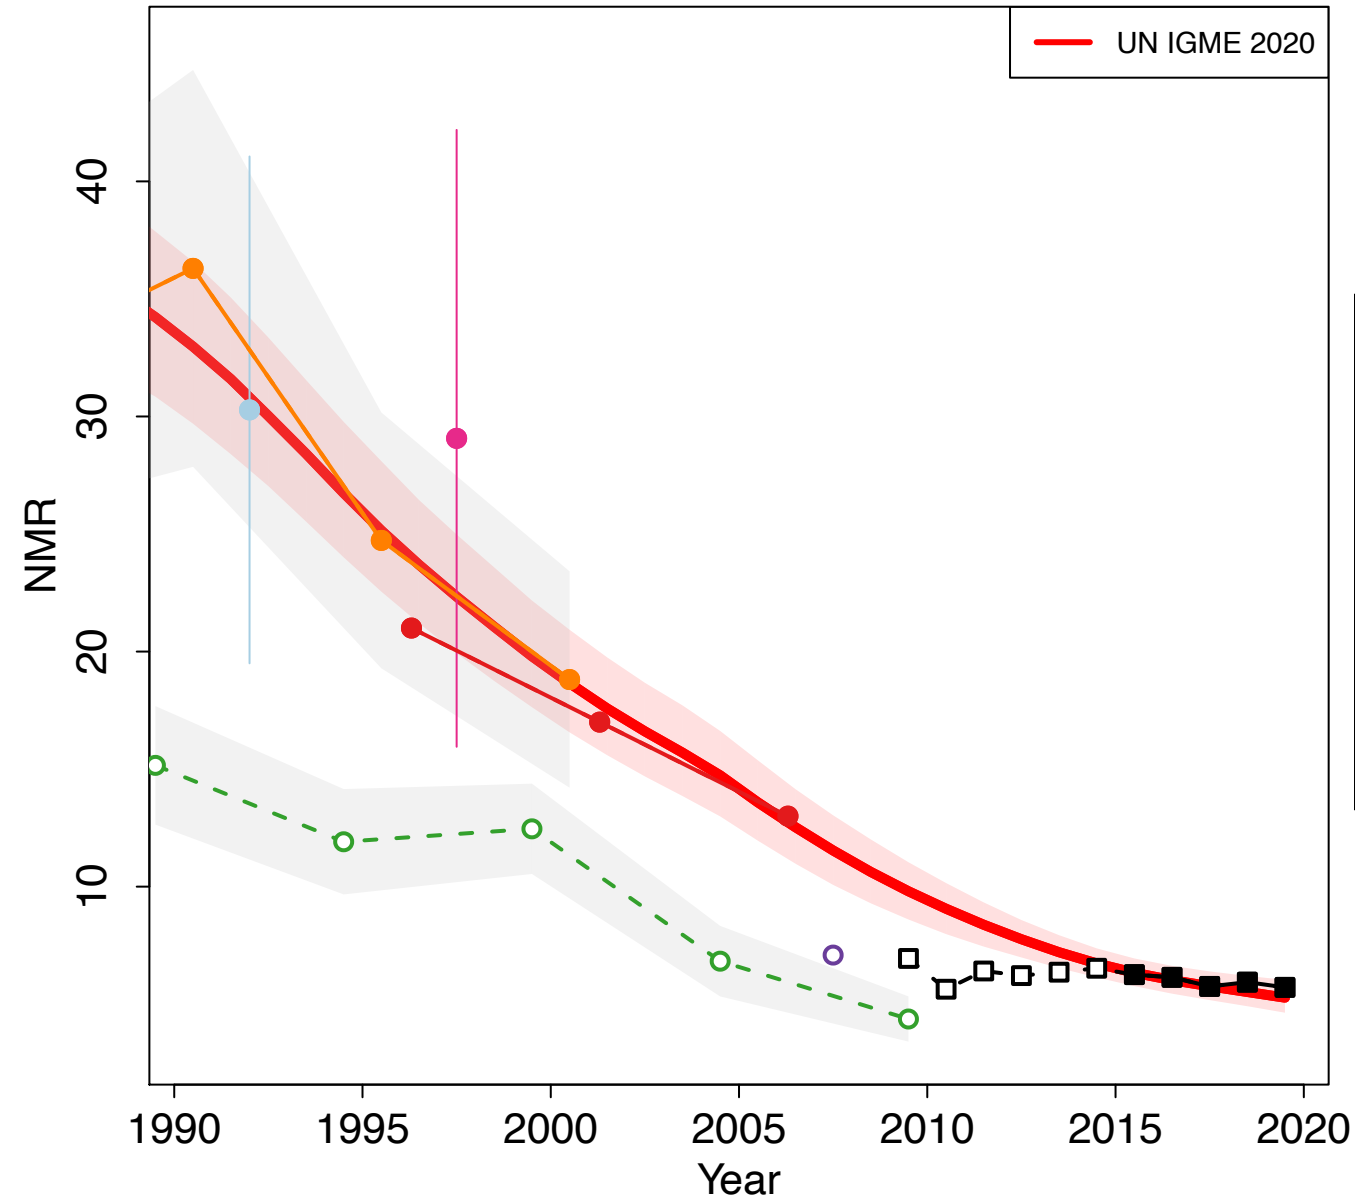

- World Fertility Survey 1978 (Other DHS)
- Turkey Population and Health Survey 1988 (Others)
- Demographic and Health Survey 1993 (DHS)
- Demographic and Health Survey 1998 (DHS)
- Demographic and Health Survey 2004 (Other DHS)
- Turkey Demographic and Health Survey 2008 (Other DHS)
- Child Mortality Survey 2010 (Others)
- Child Mortality Survey 2012 (Others)
- Demographic and Health Survey 2013 (Other DHS)
- VR WHO

# Turkmenistan

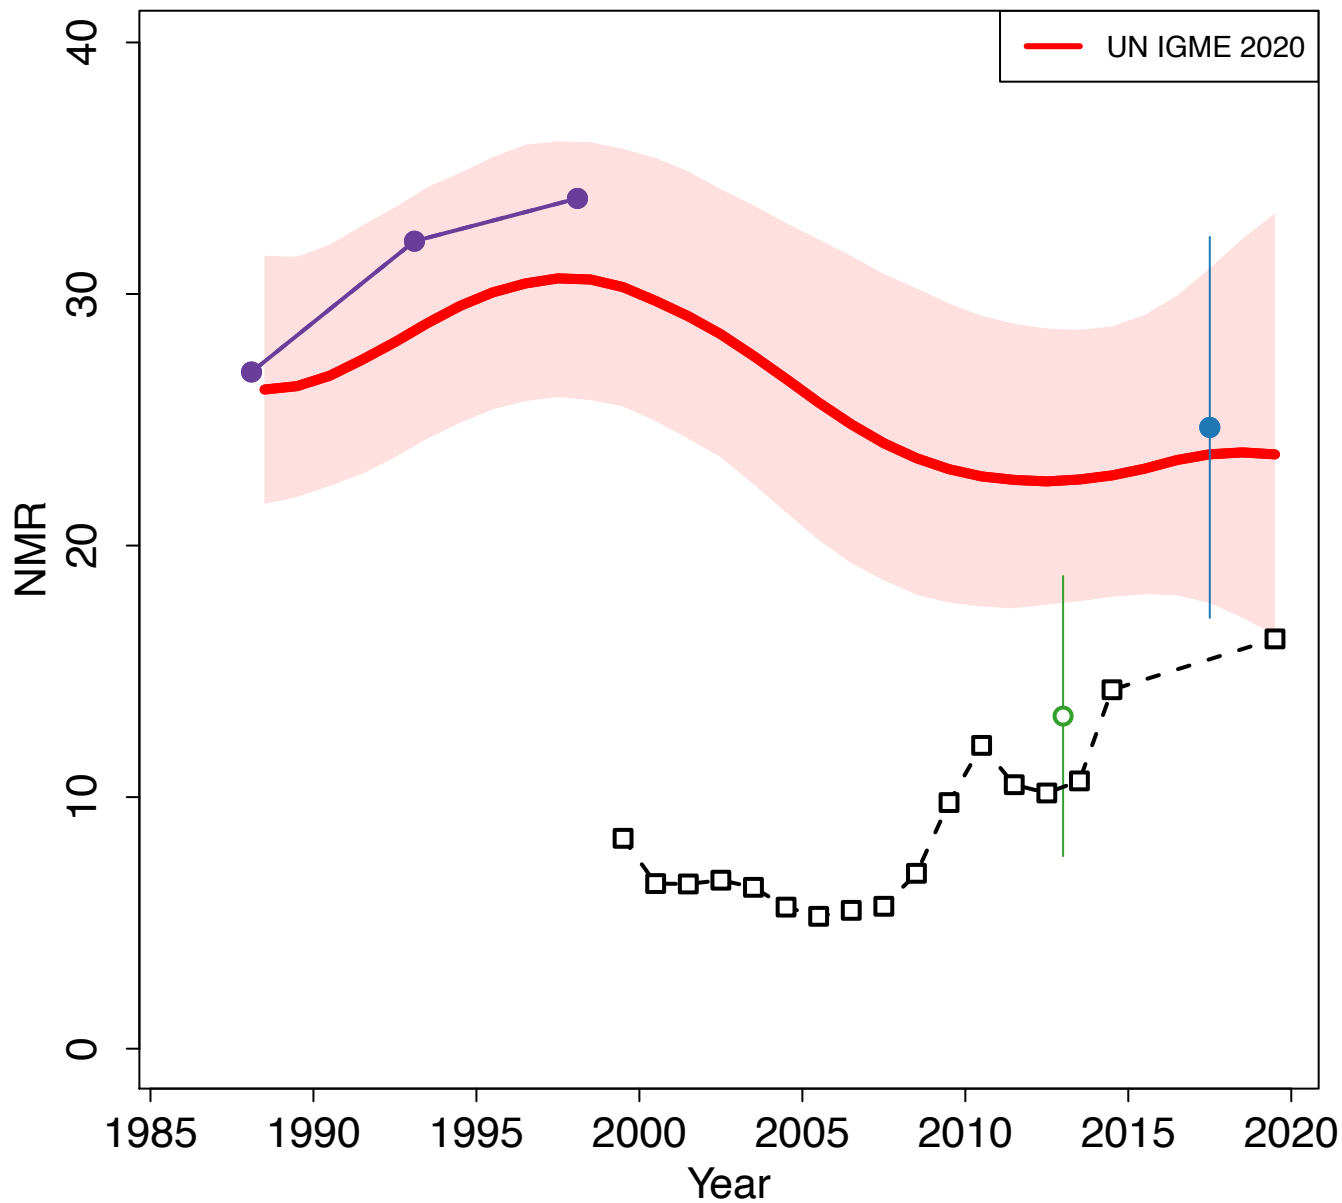

# Zoomed in

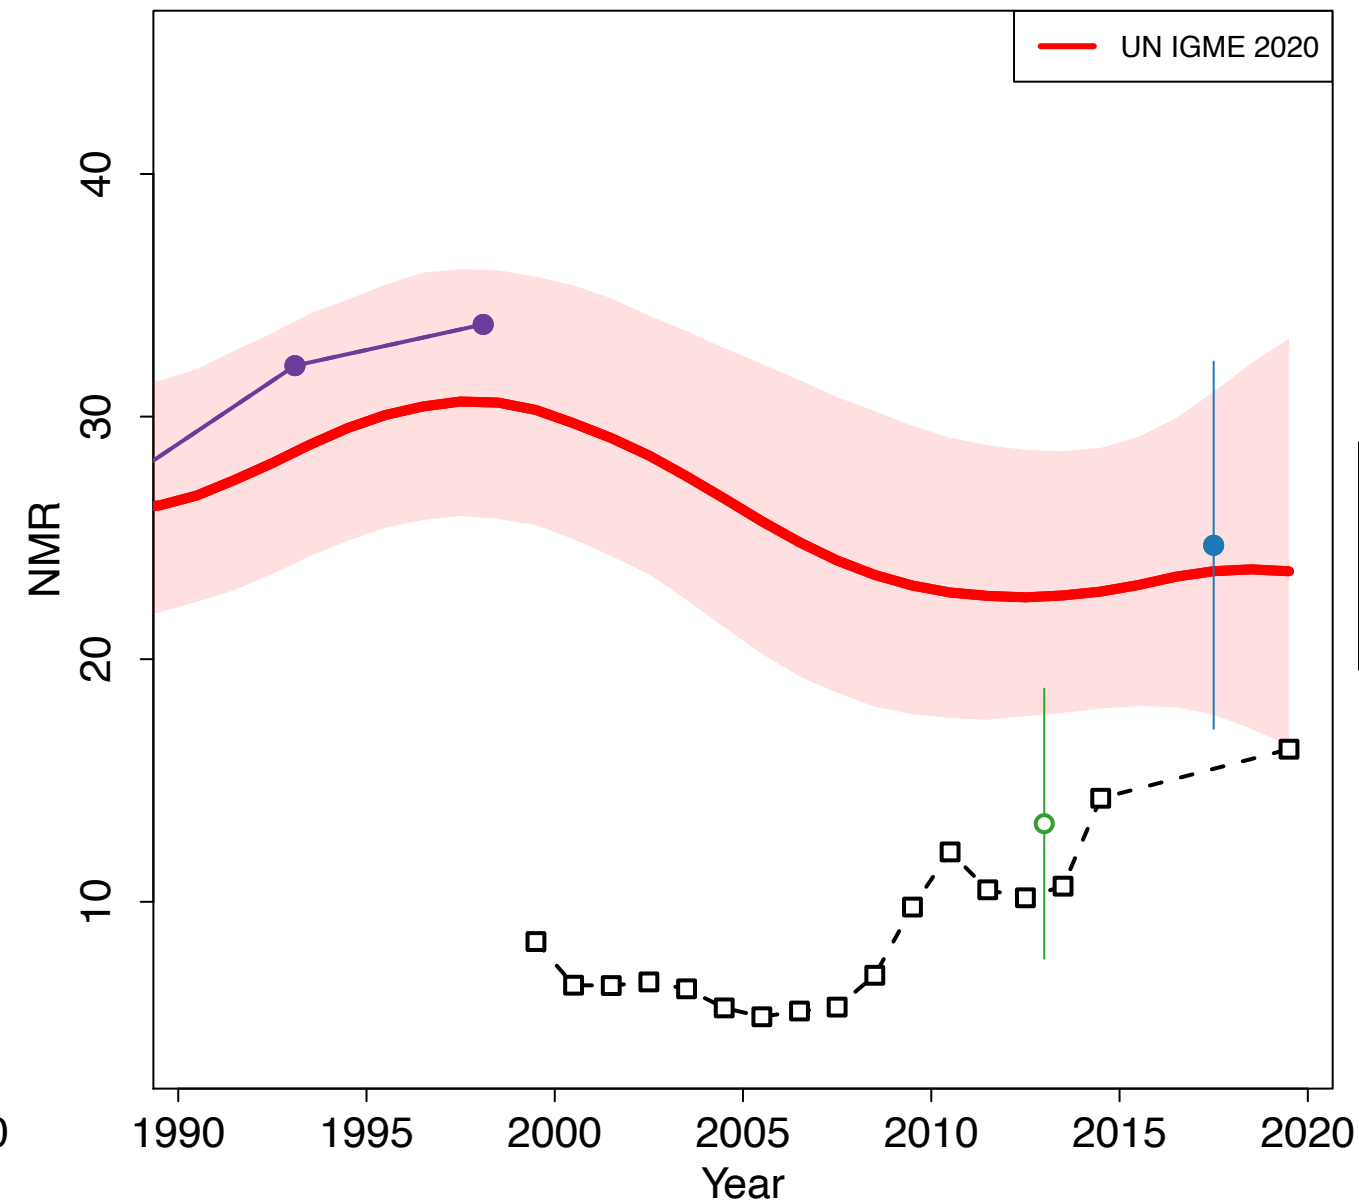

- Demographic and Health Survey 2000 (DHS)
- Multiple Indicator Cluster Survey 2015–2016 (MICS)
- Multiple Indicator Cluster Survey 2019 (MICS)
- VR WHO

# Tuvalu

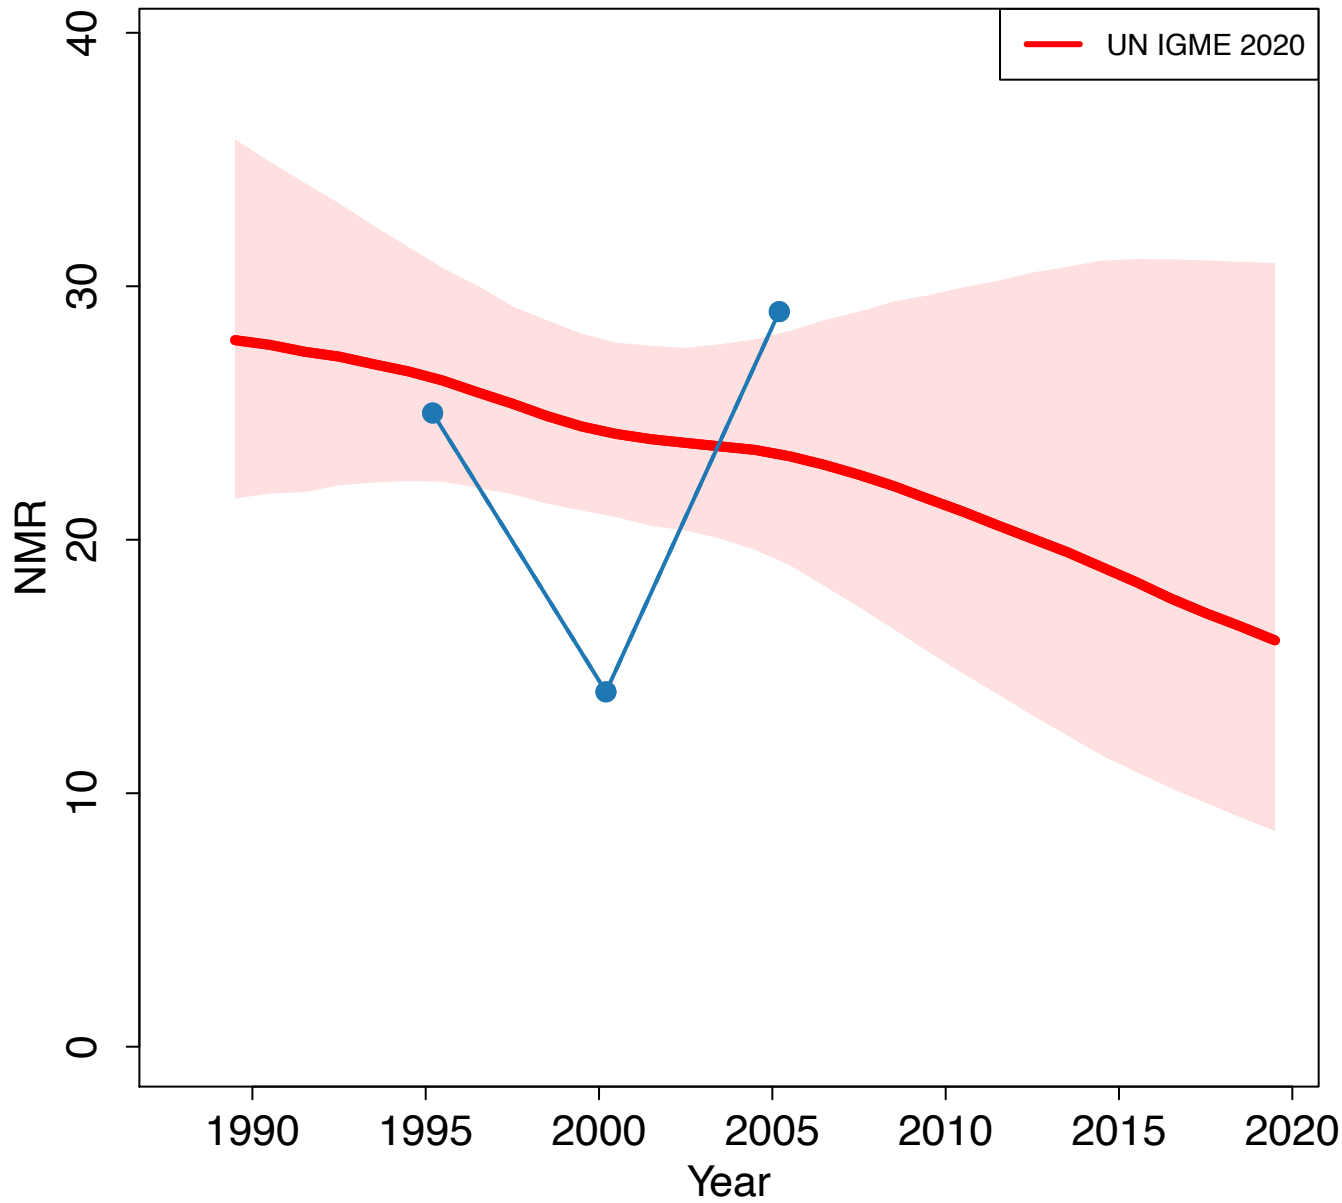

# Zoomed in

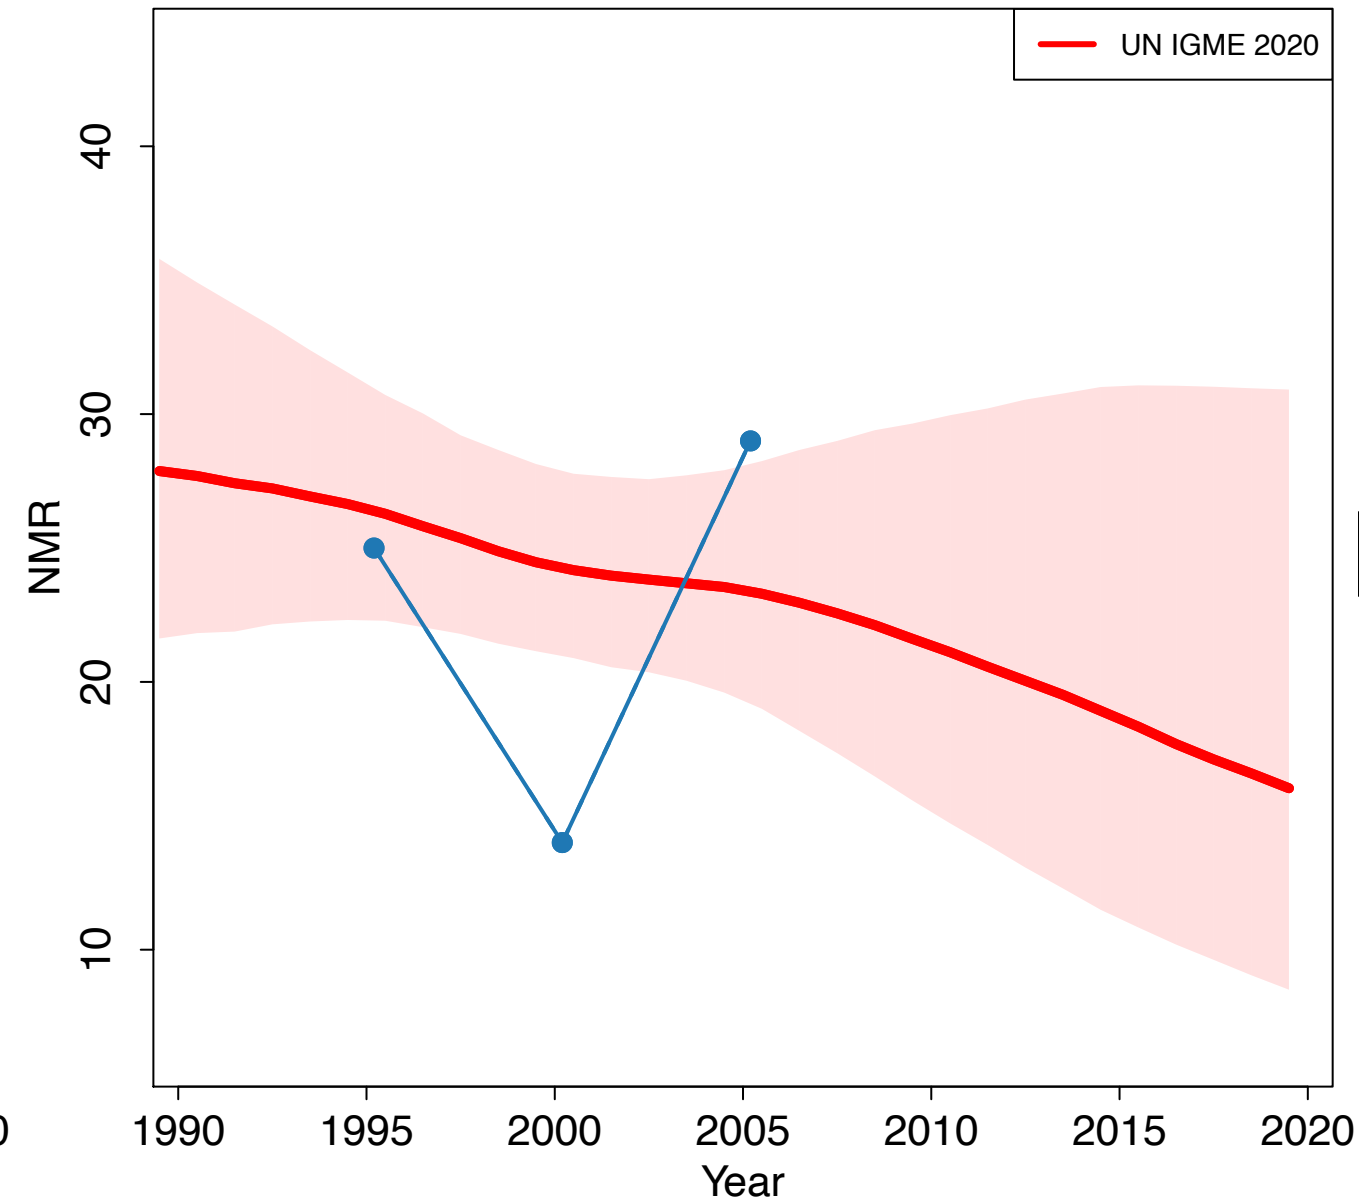

# Uganda

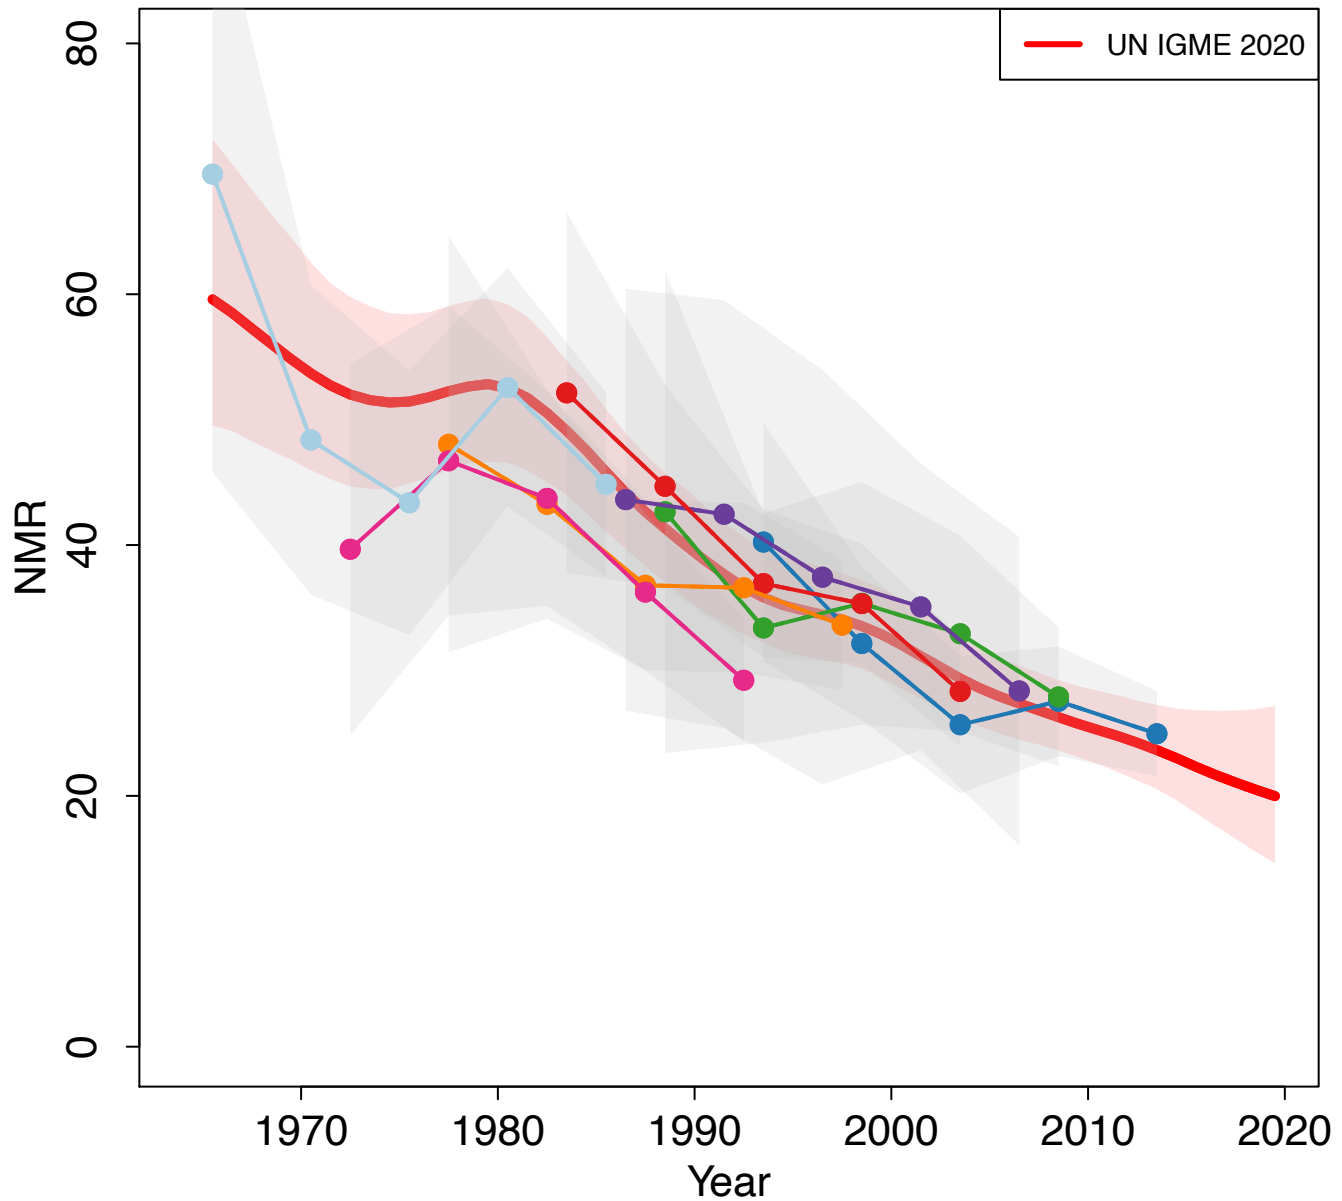

# Zoomed in

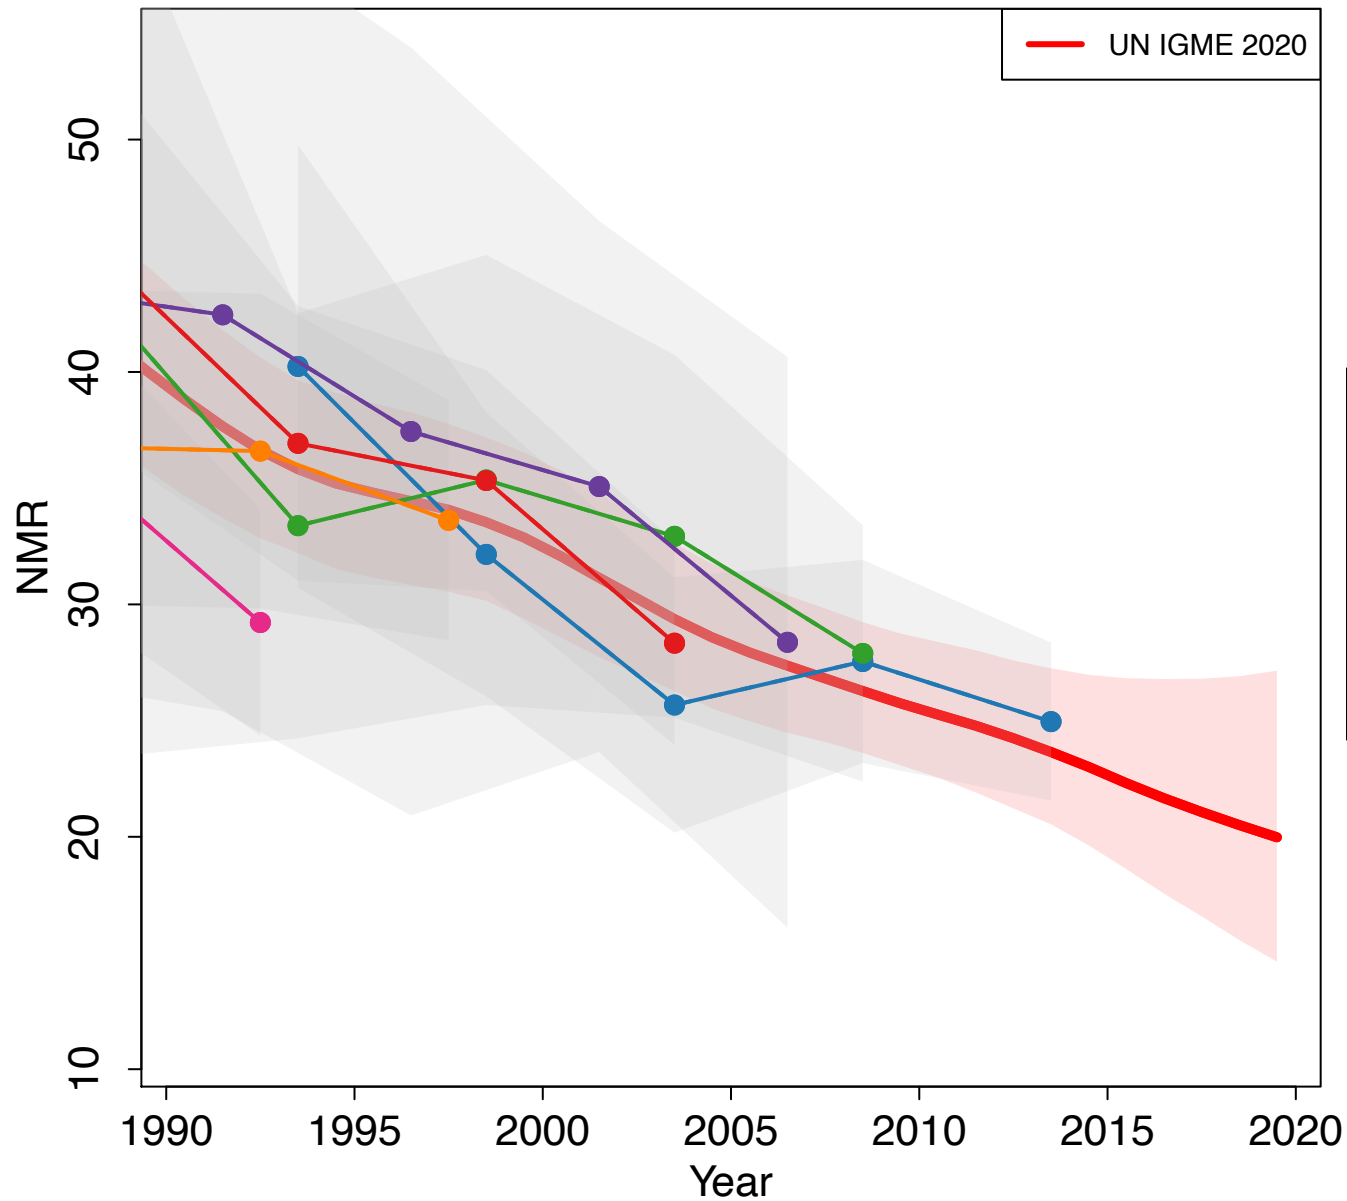

- Demographic and Health Survey 1988–1989 (DHS)
- Demographic and Health Survey 1995 (DHS)
- Demographic and Health Survey 2000–2001 (DHS)
- Demographic and Health Survey 2006 (DHS)
- Malaria Indicator Survey 2009–2010 (Other DHS)
- Demographic and Health Survey 2011 (DHS)
- Demographic and Health Survey 2016 (DHS)

# Ukraine

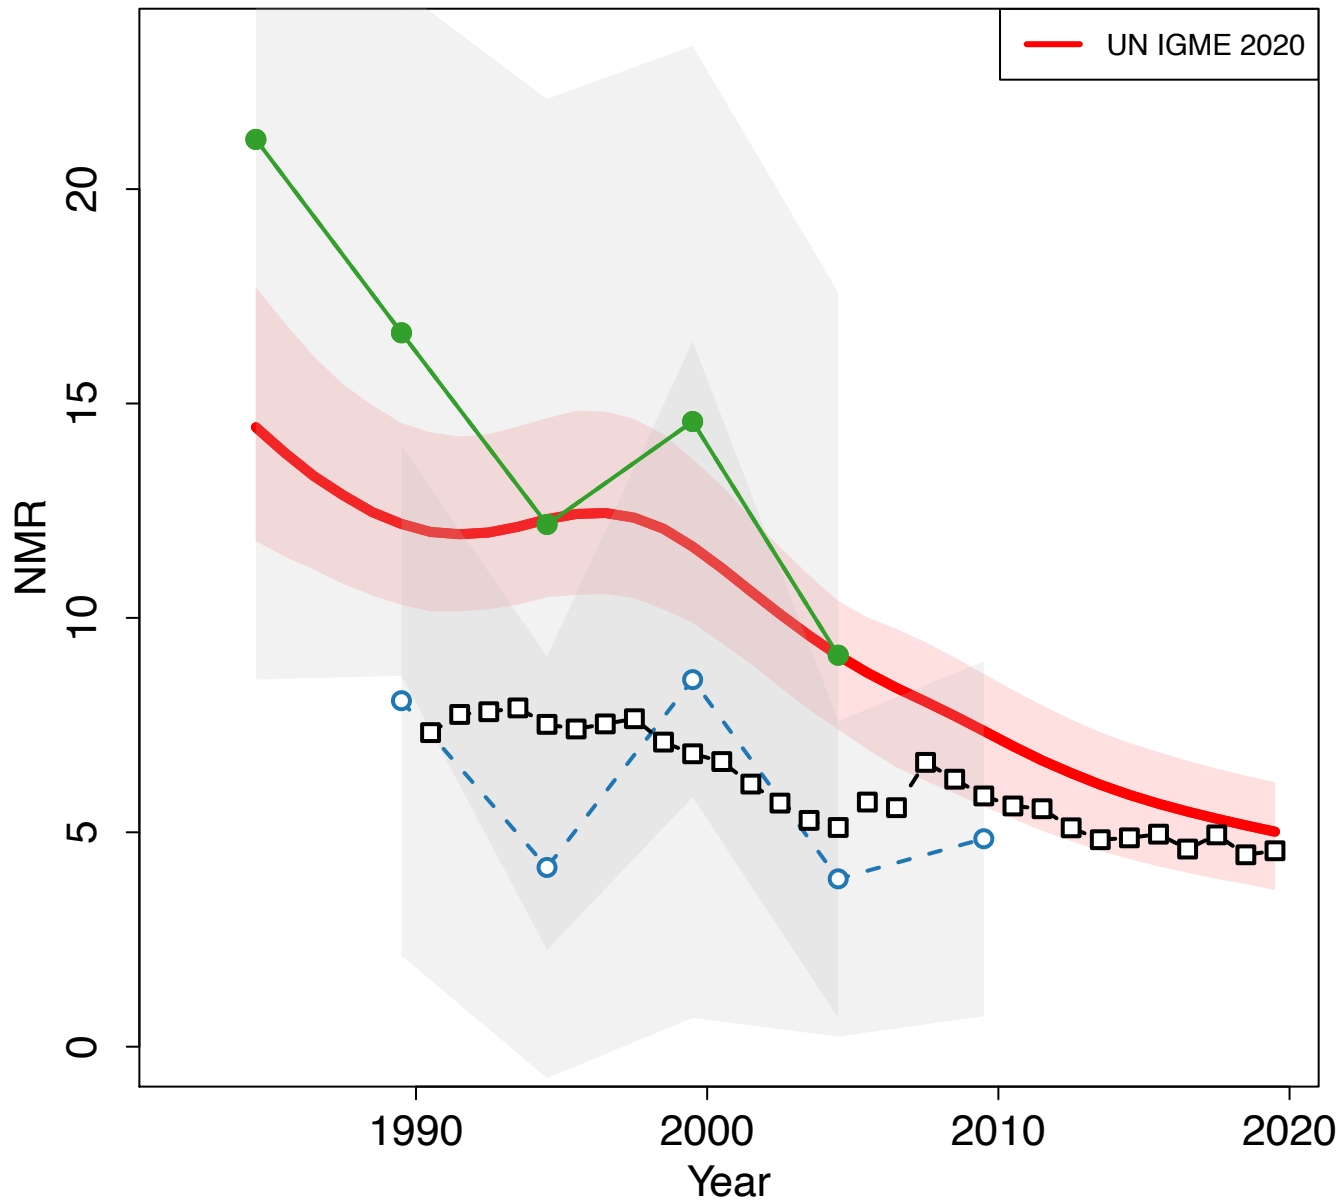

# Zoomed in

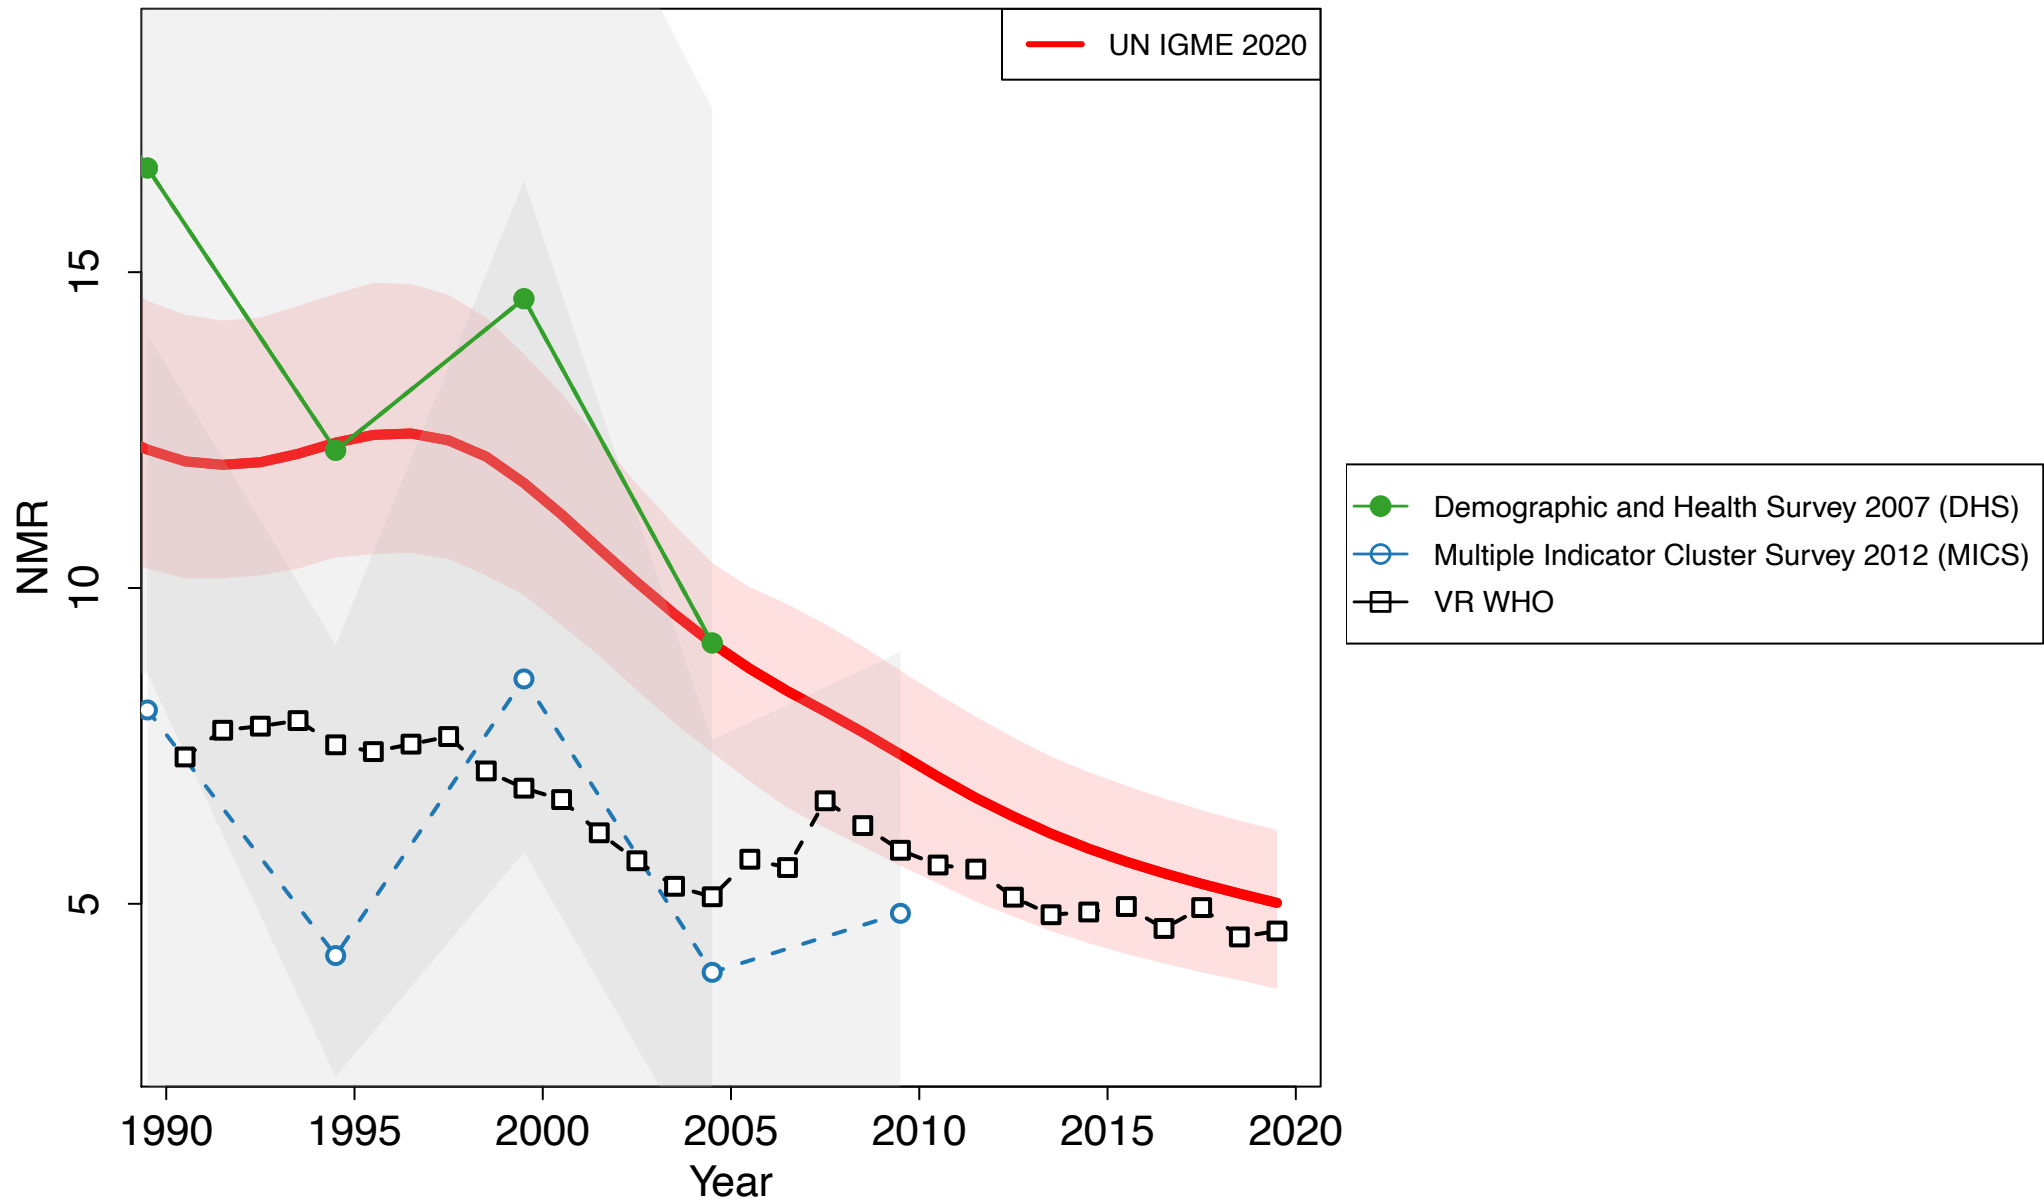

# United Arab Emirates

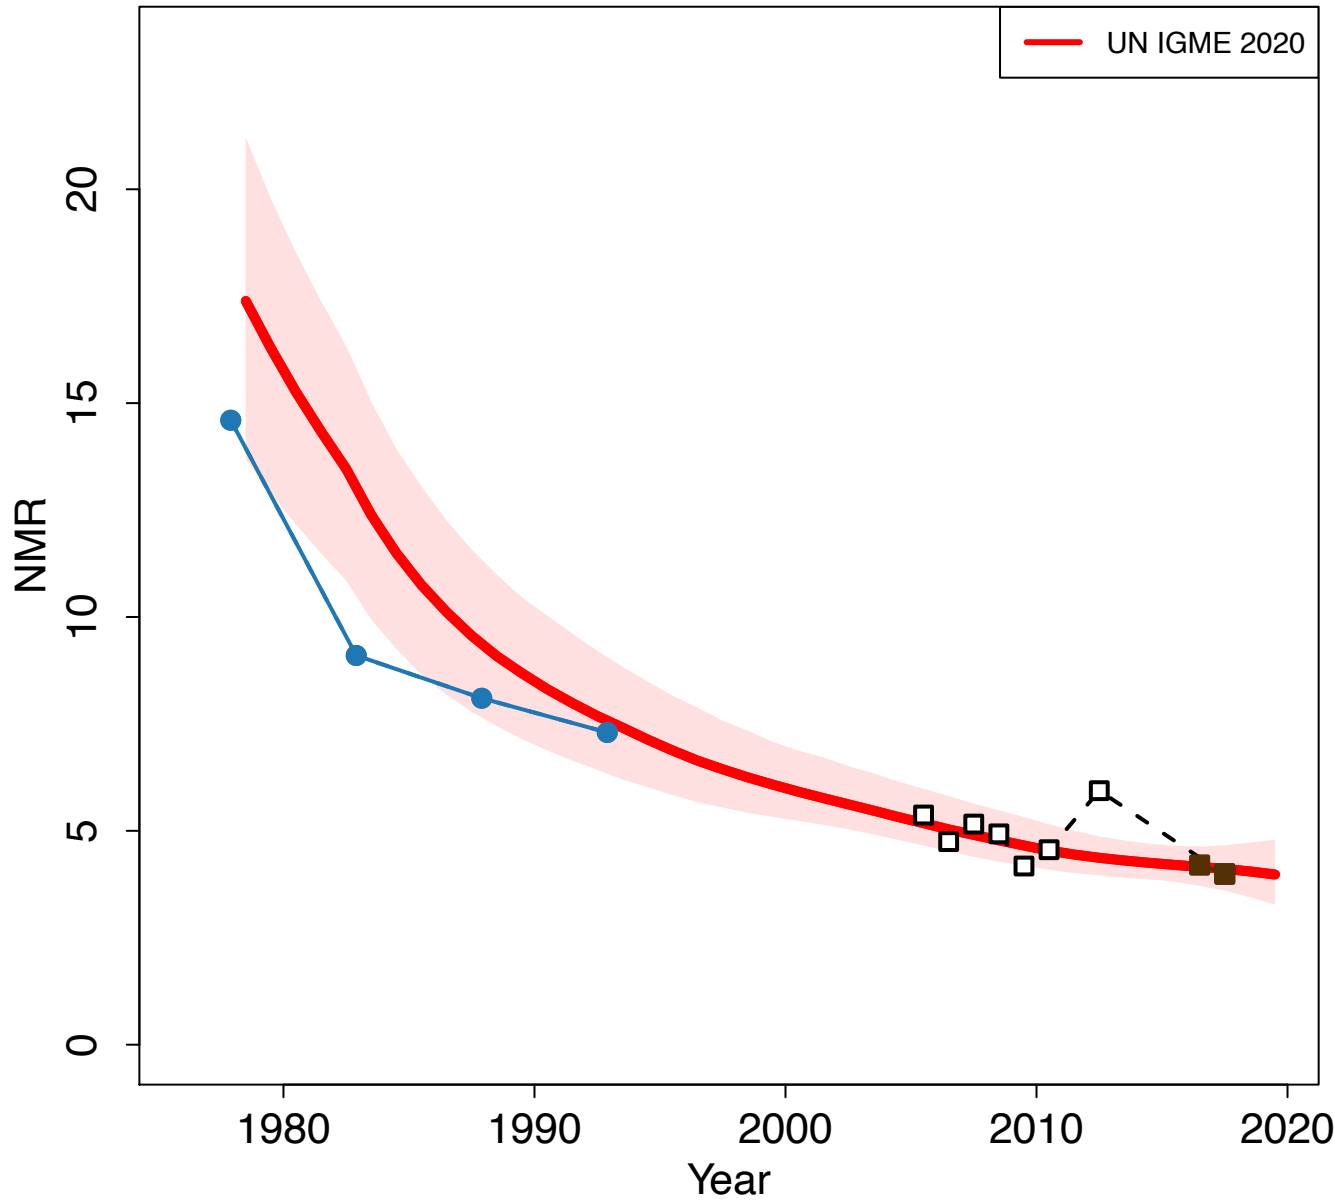

# Zoomed in

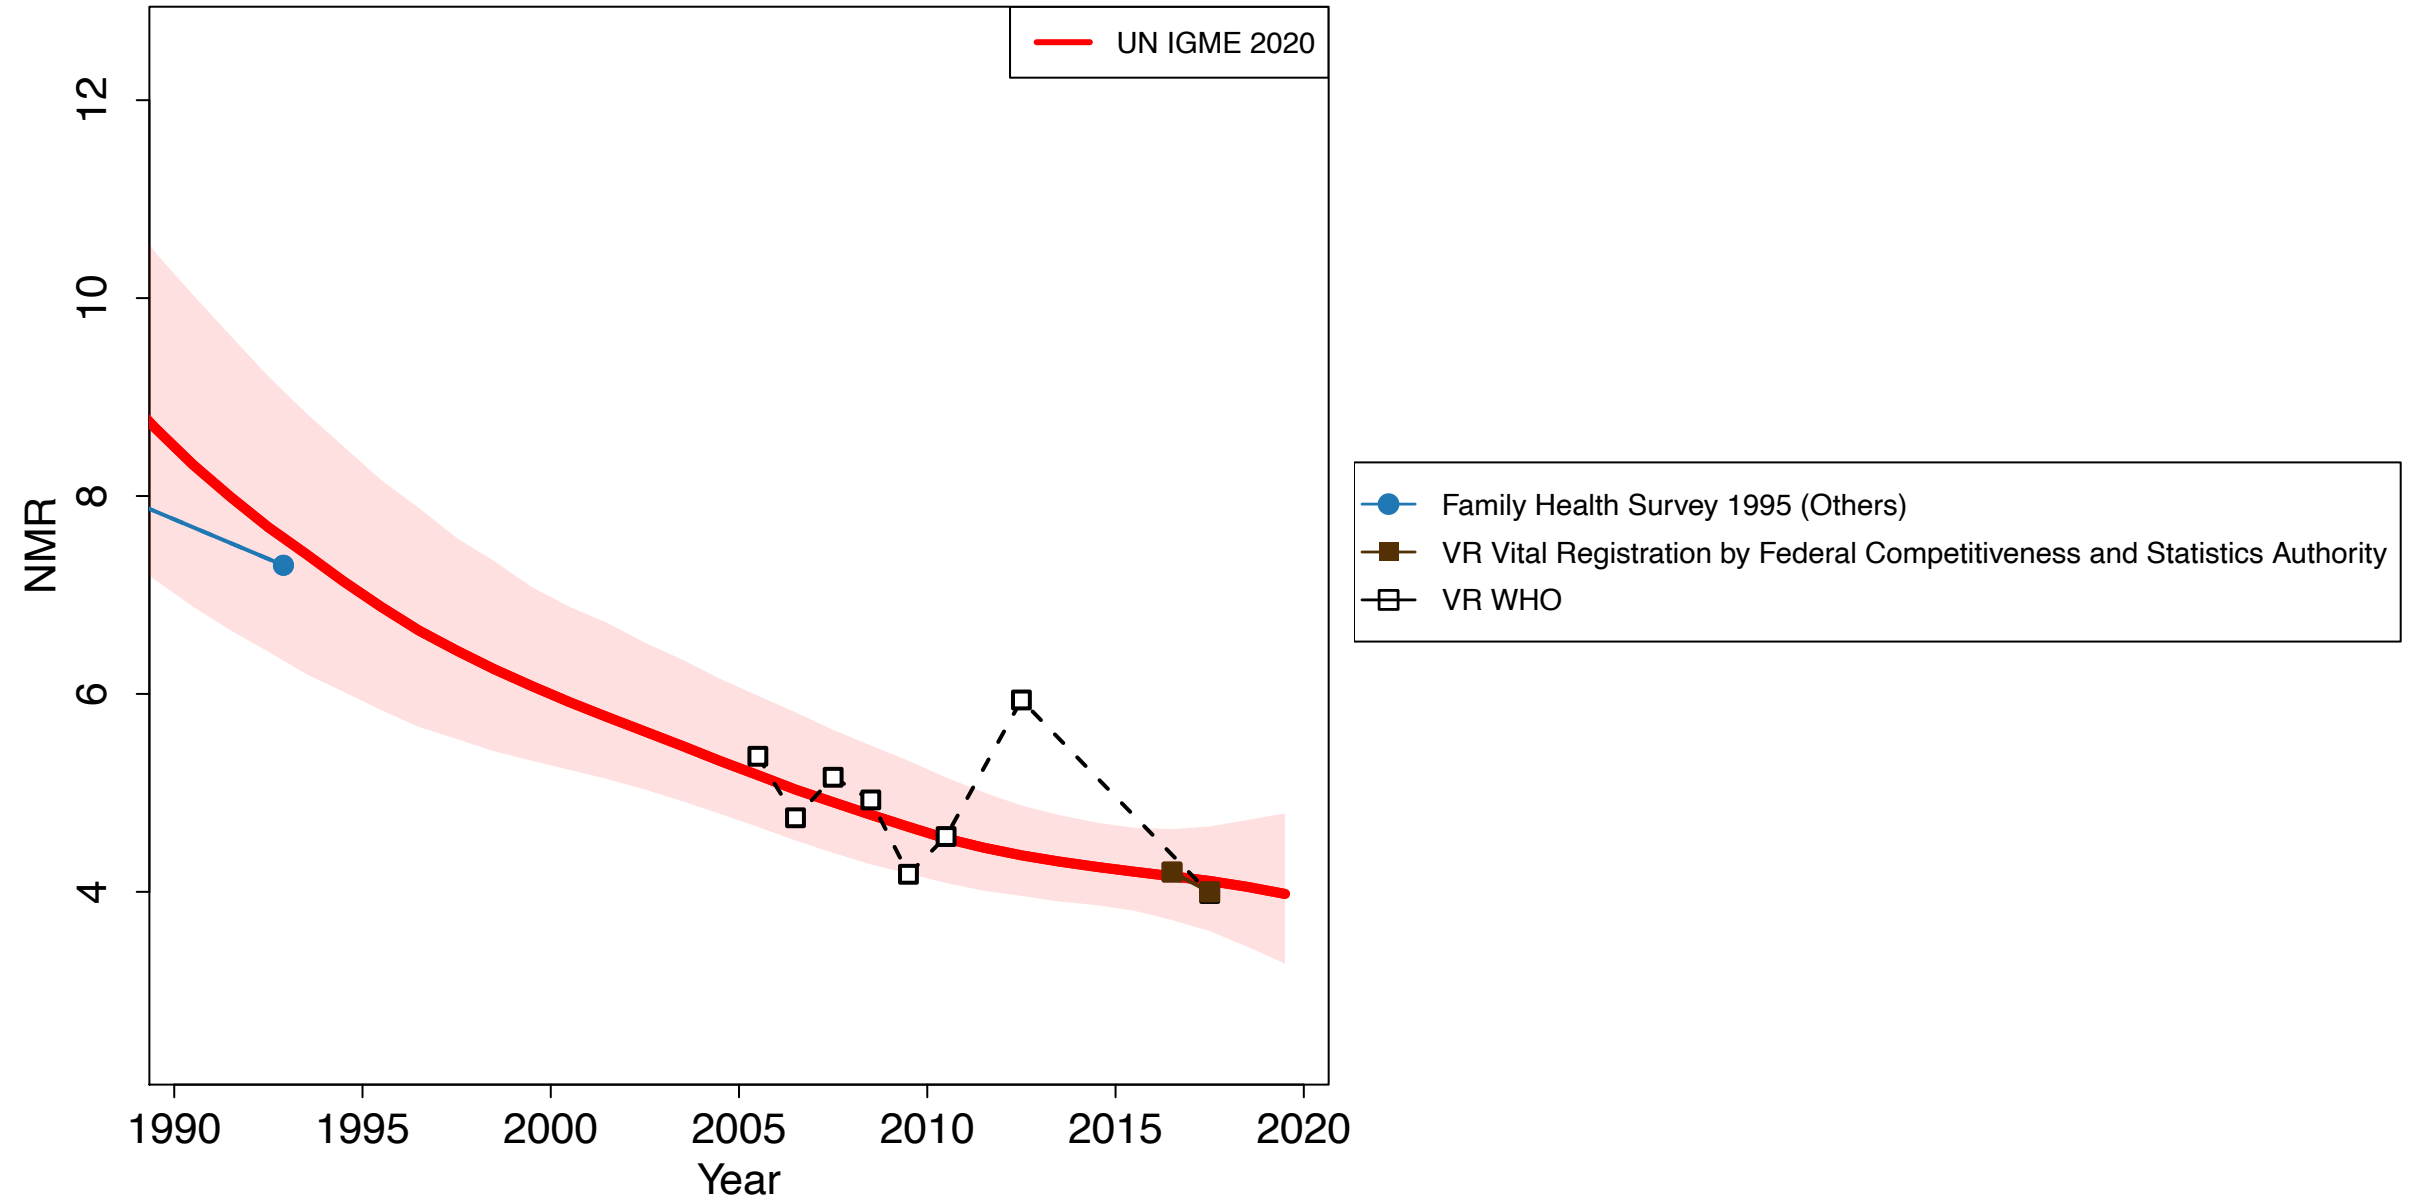

# United Kingdom

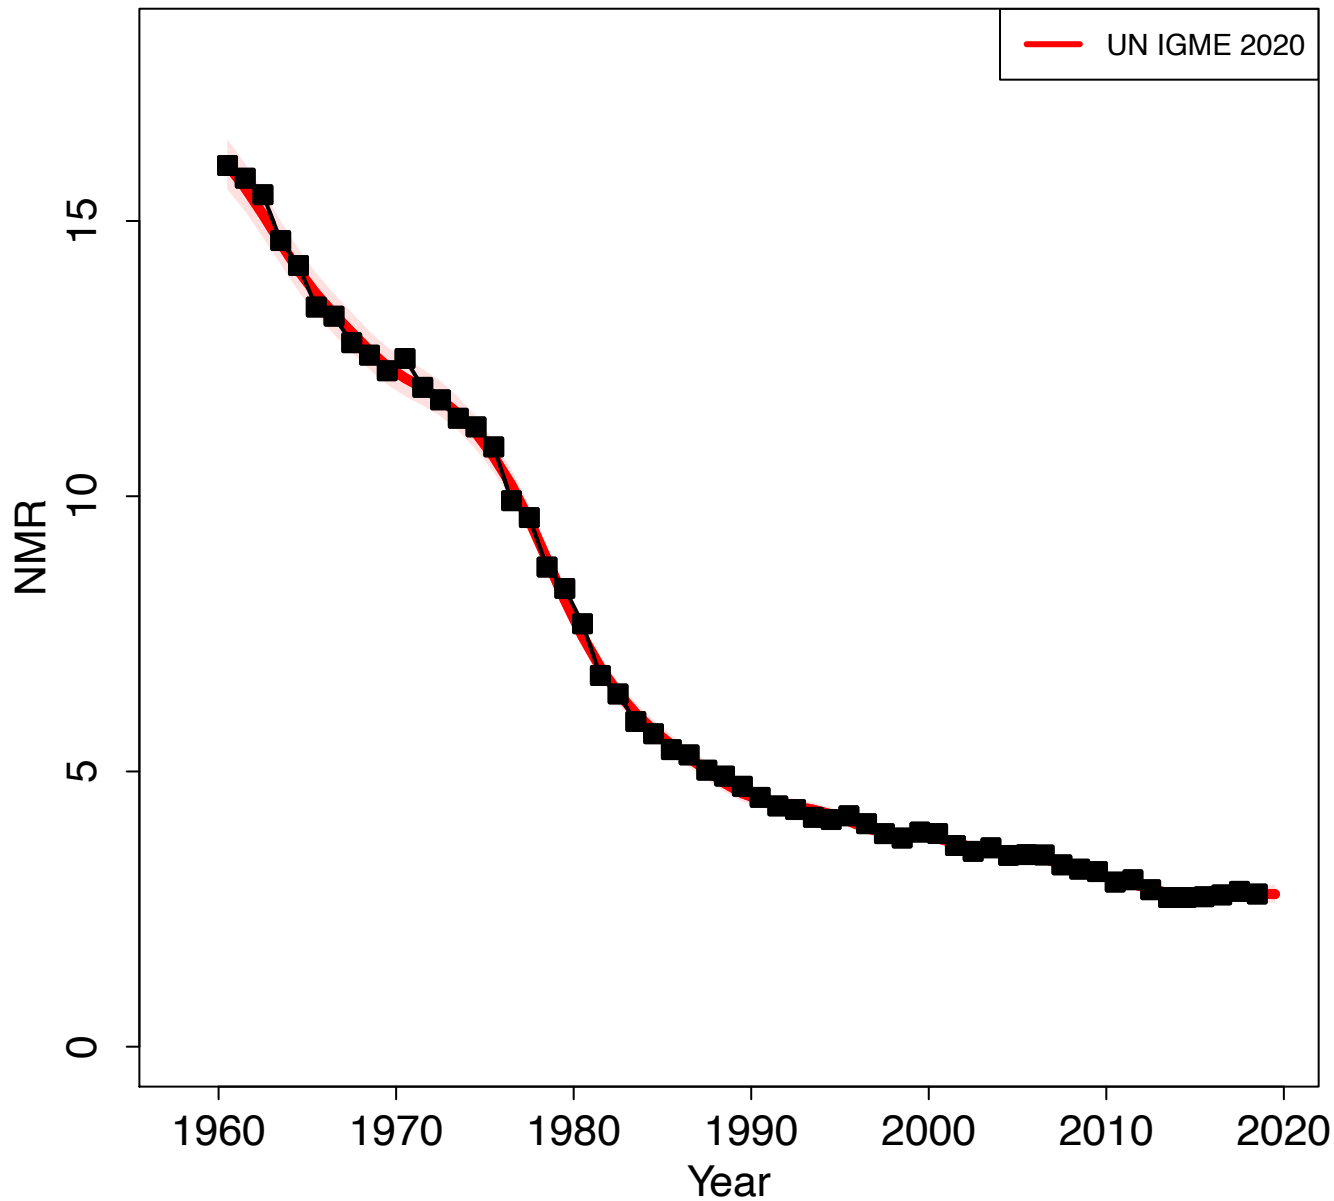

# Zoomed in

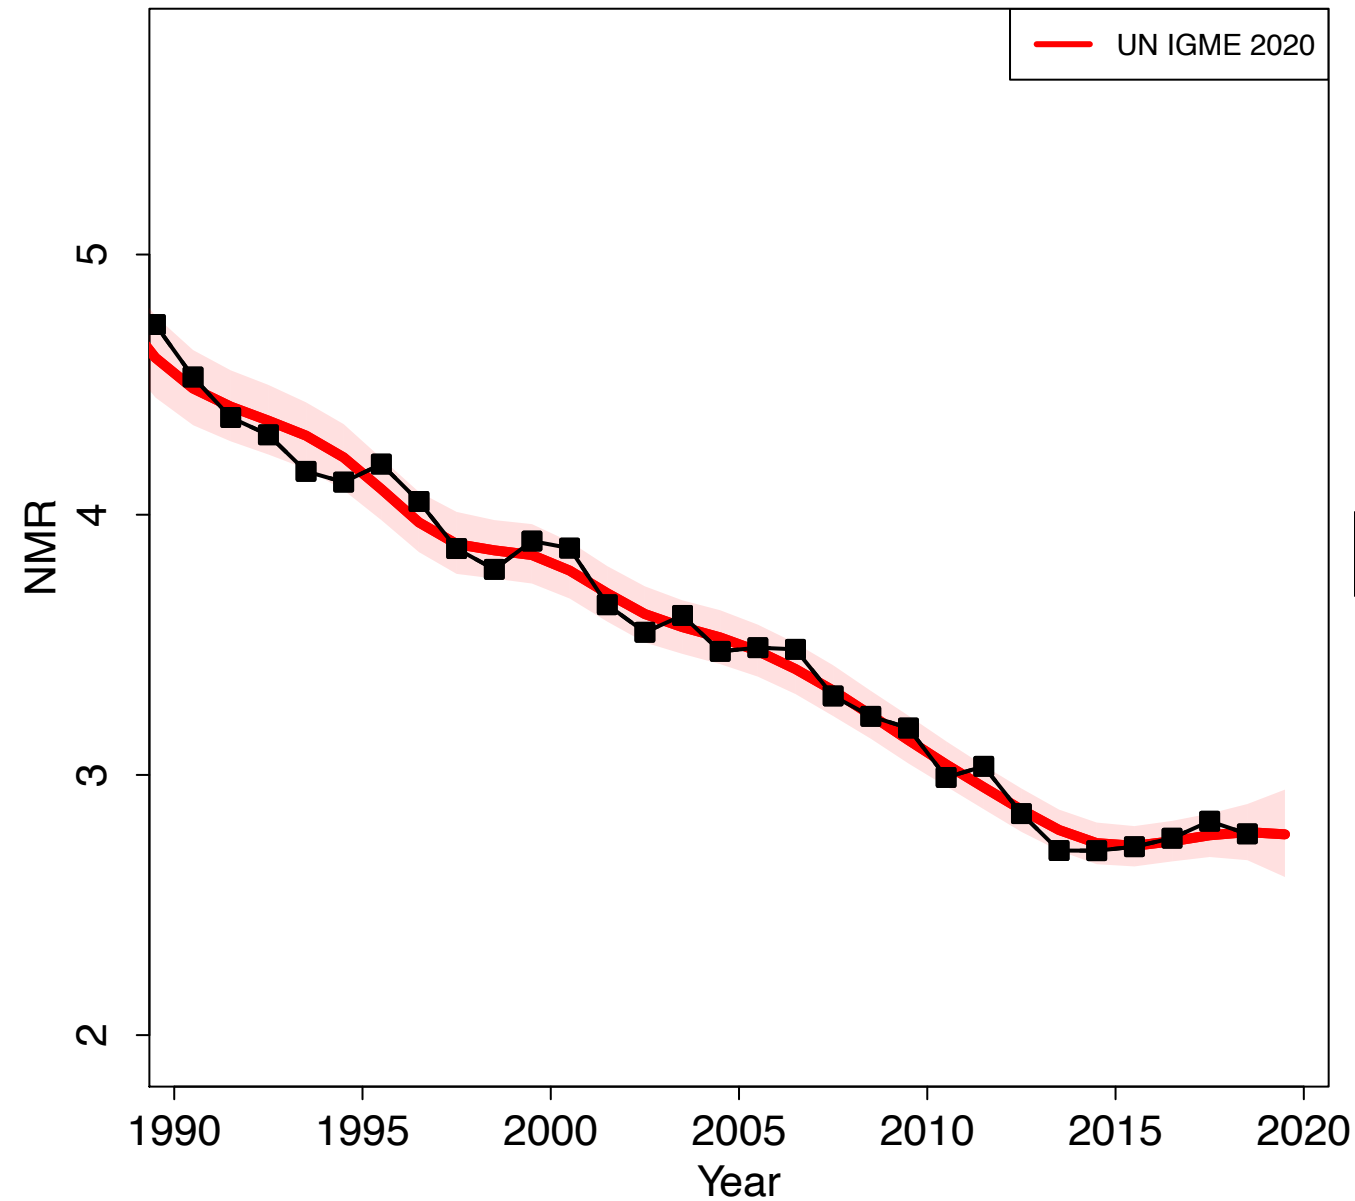

# United States of America

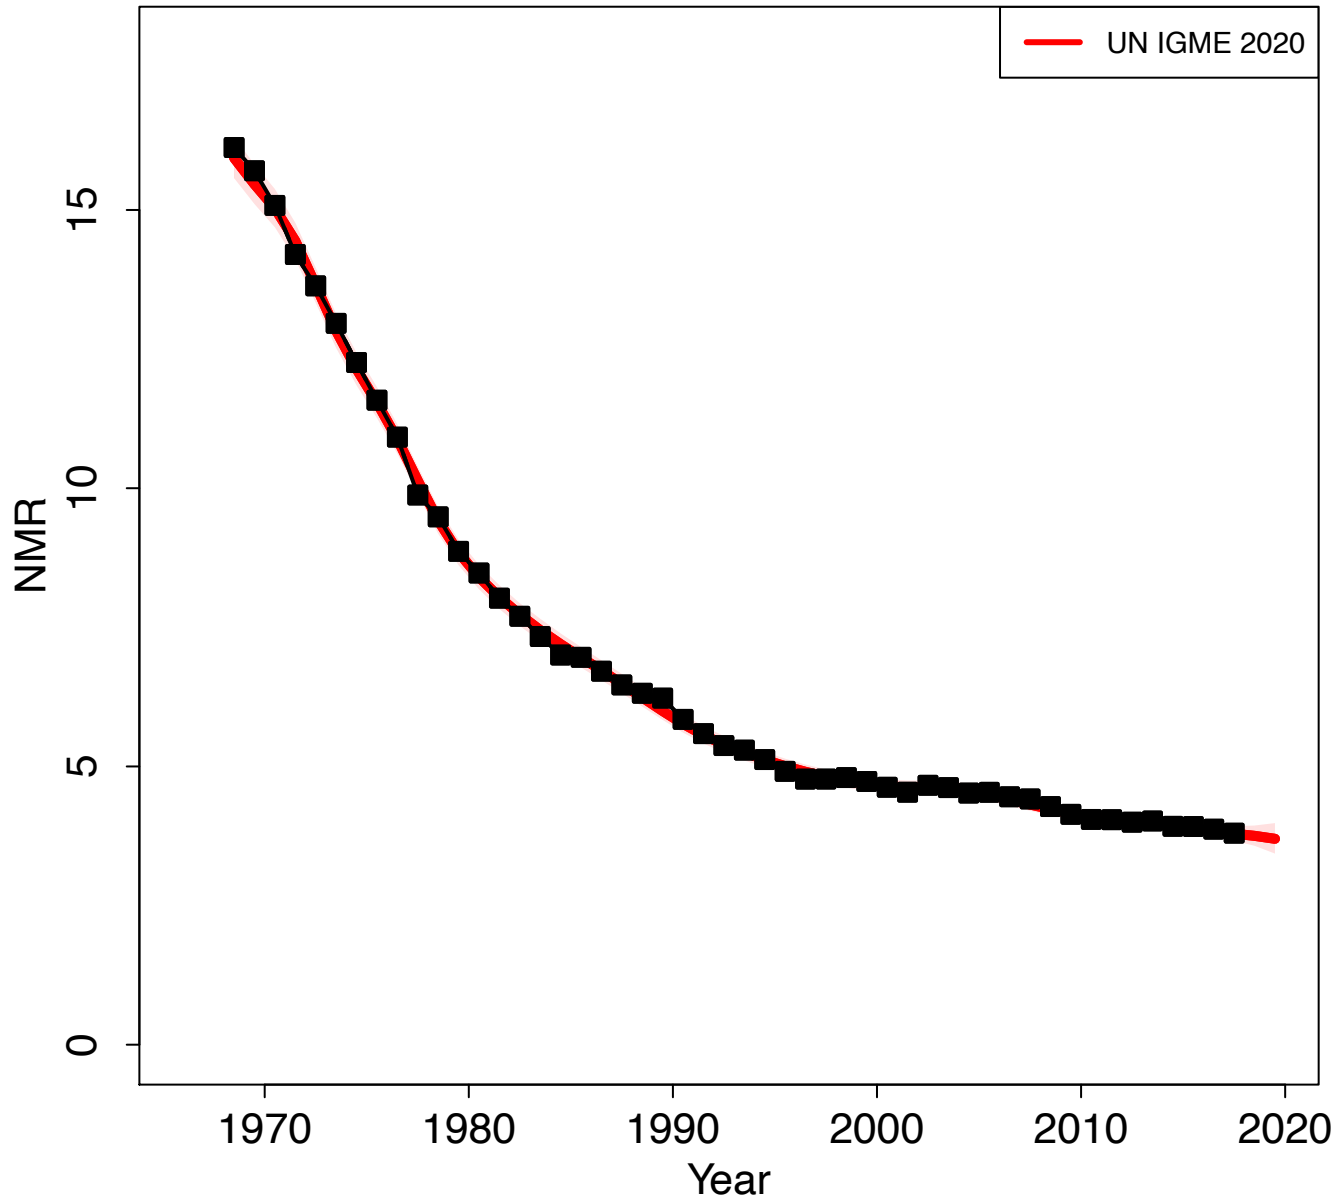

# Zoomed in

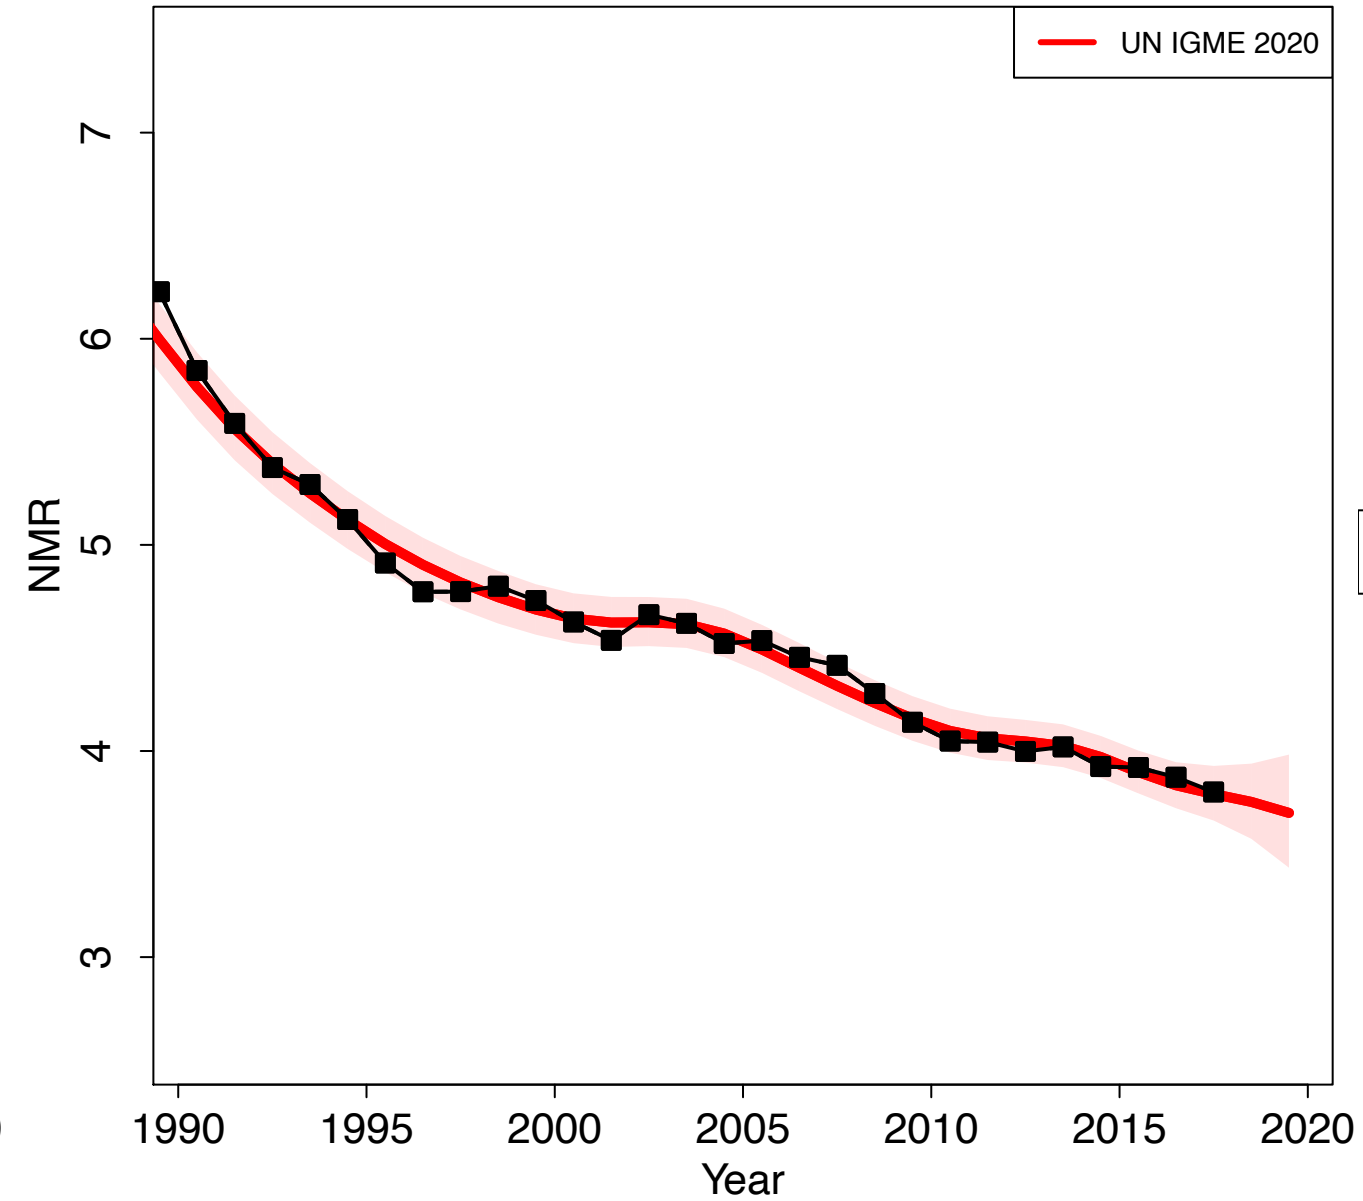



# Uruguay

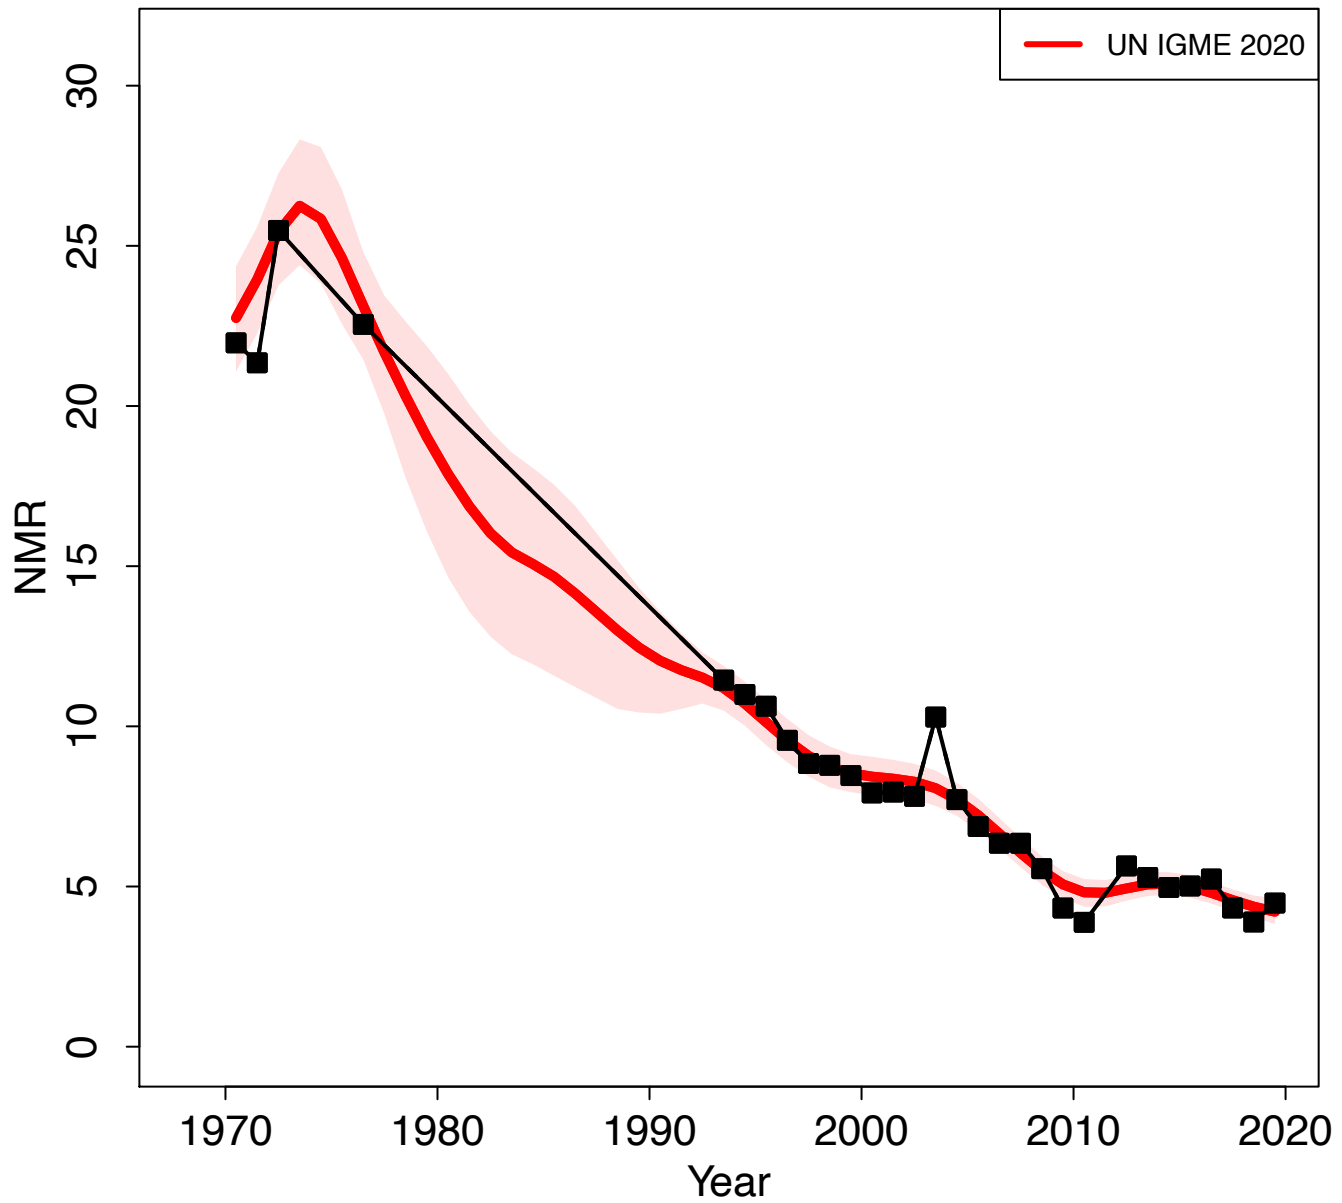

# Zoomed in

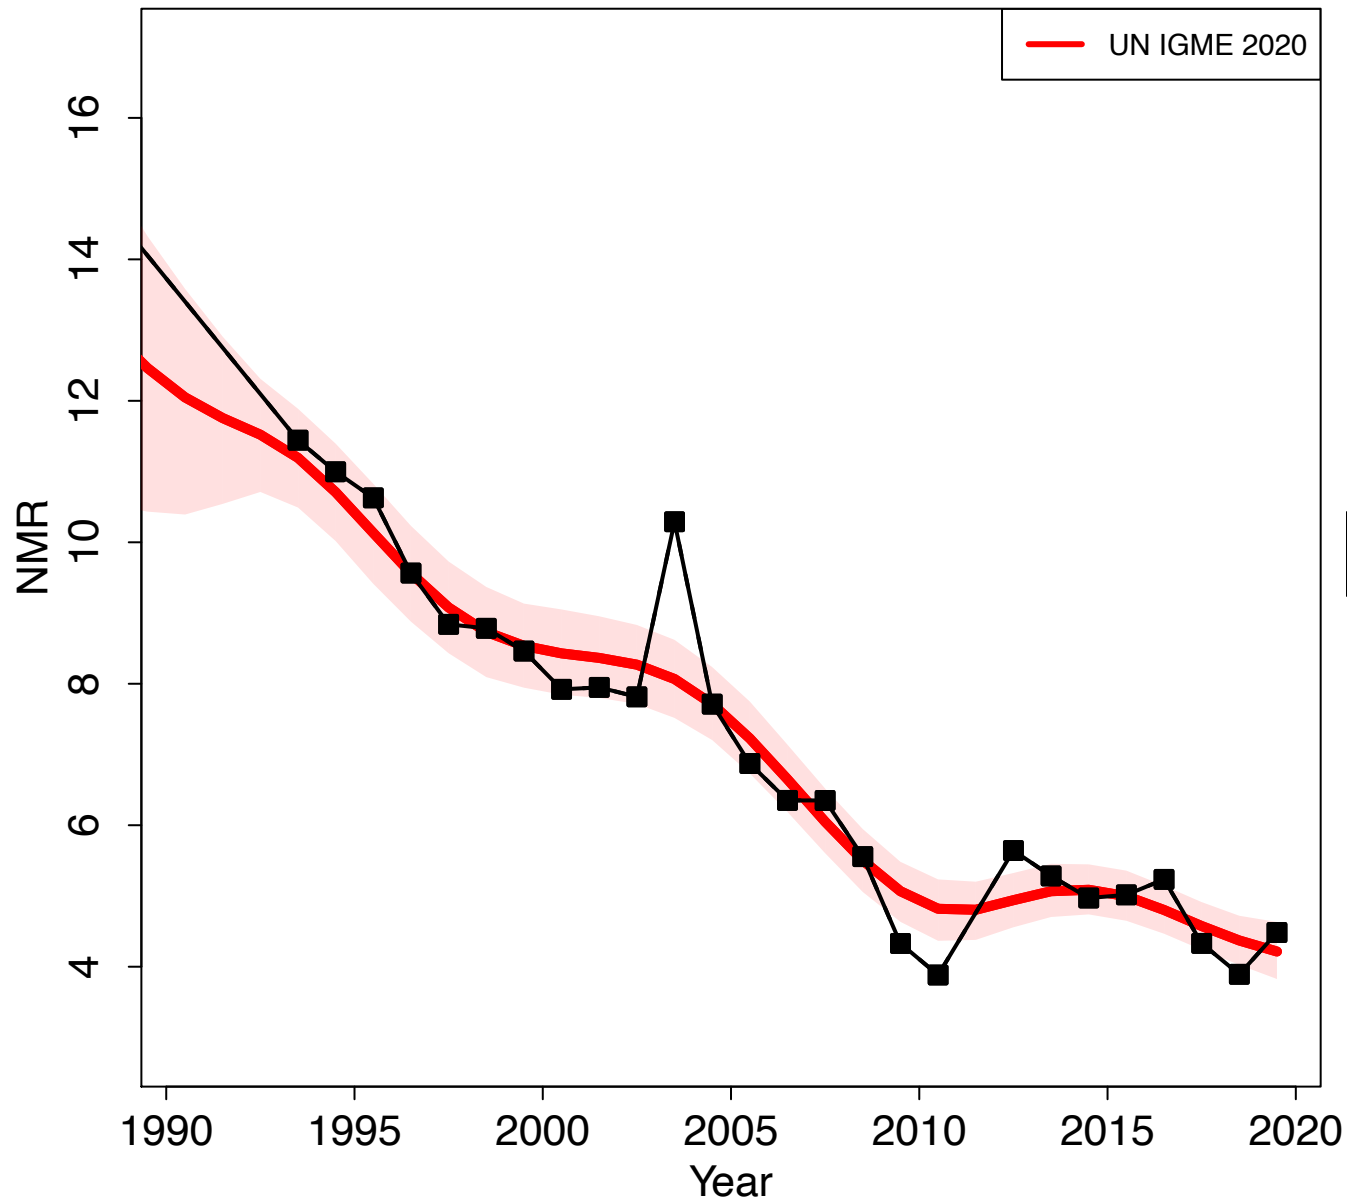

# Uzbekistan

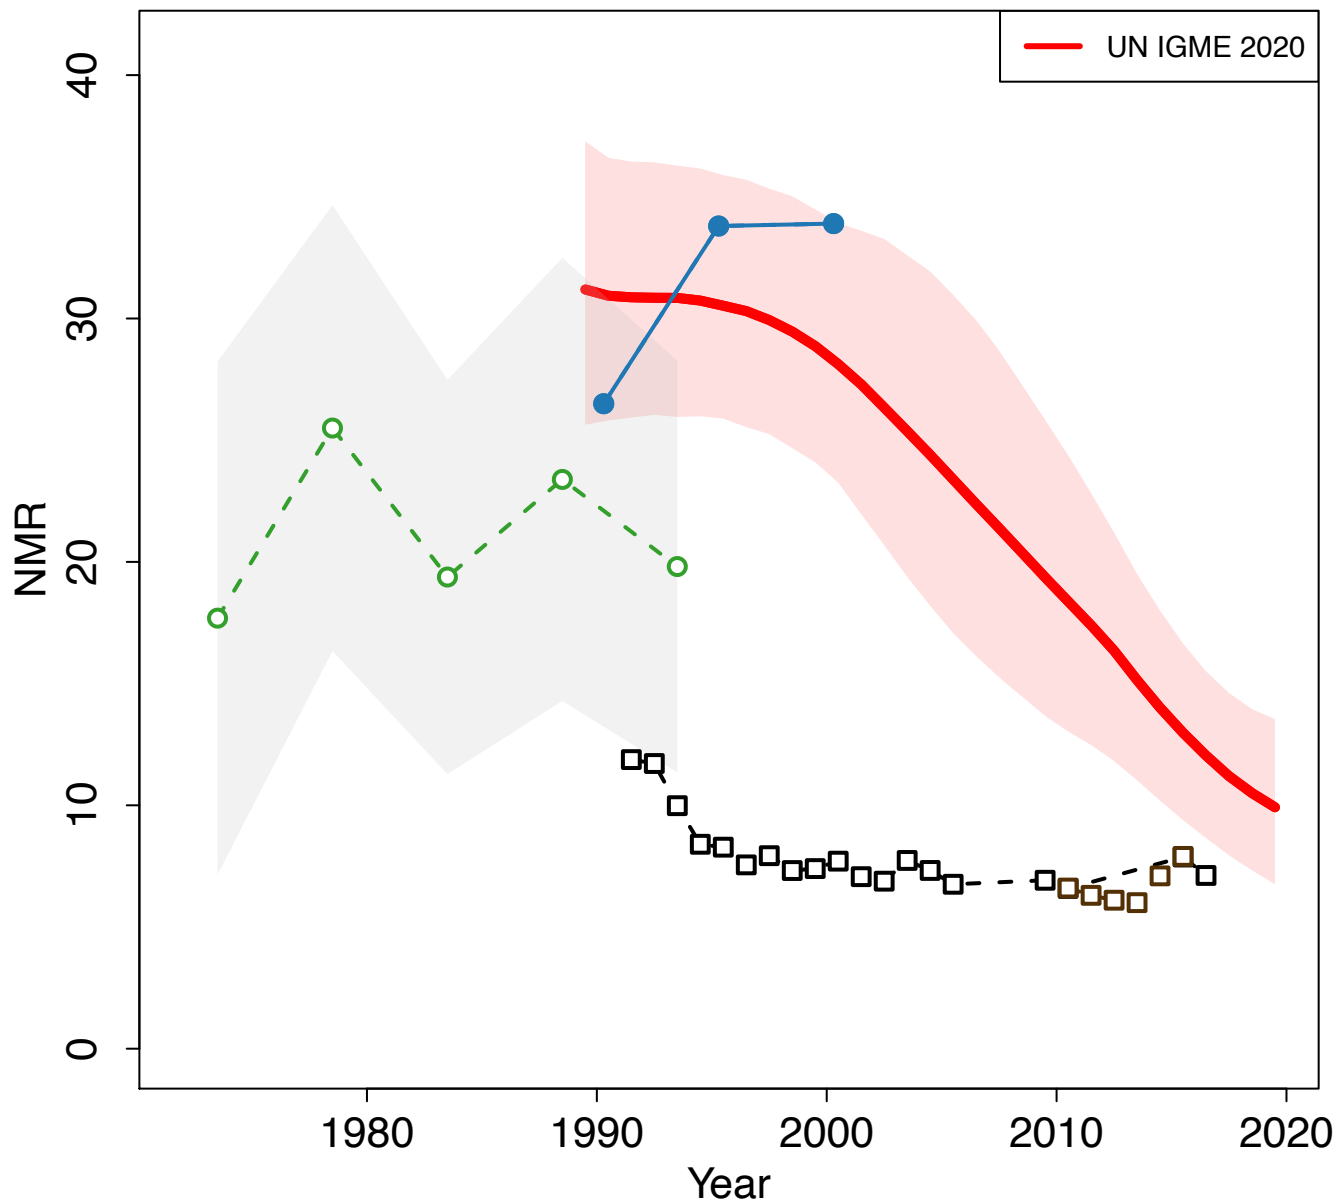

# Zoomed in

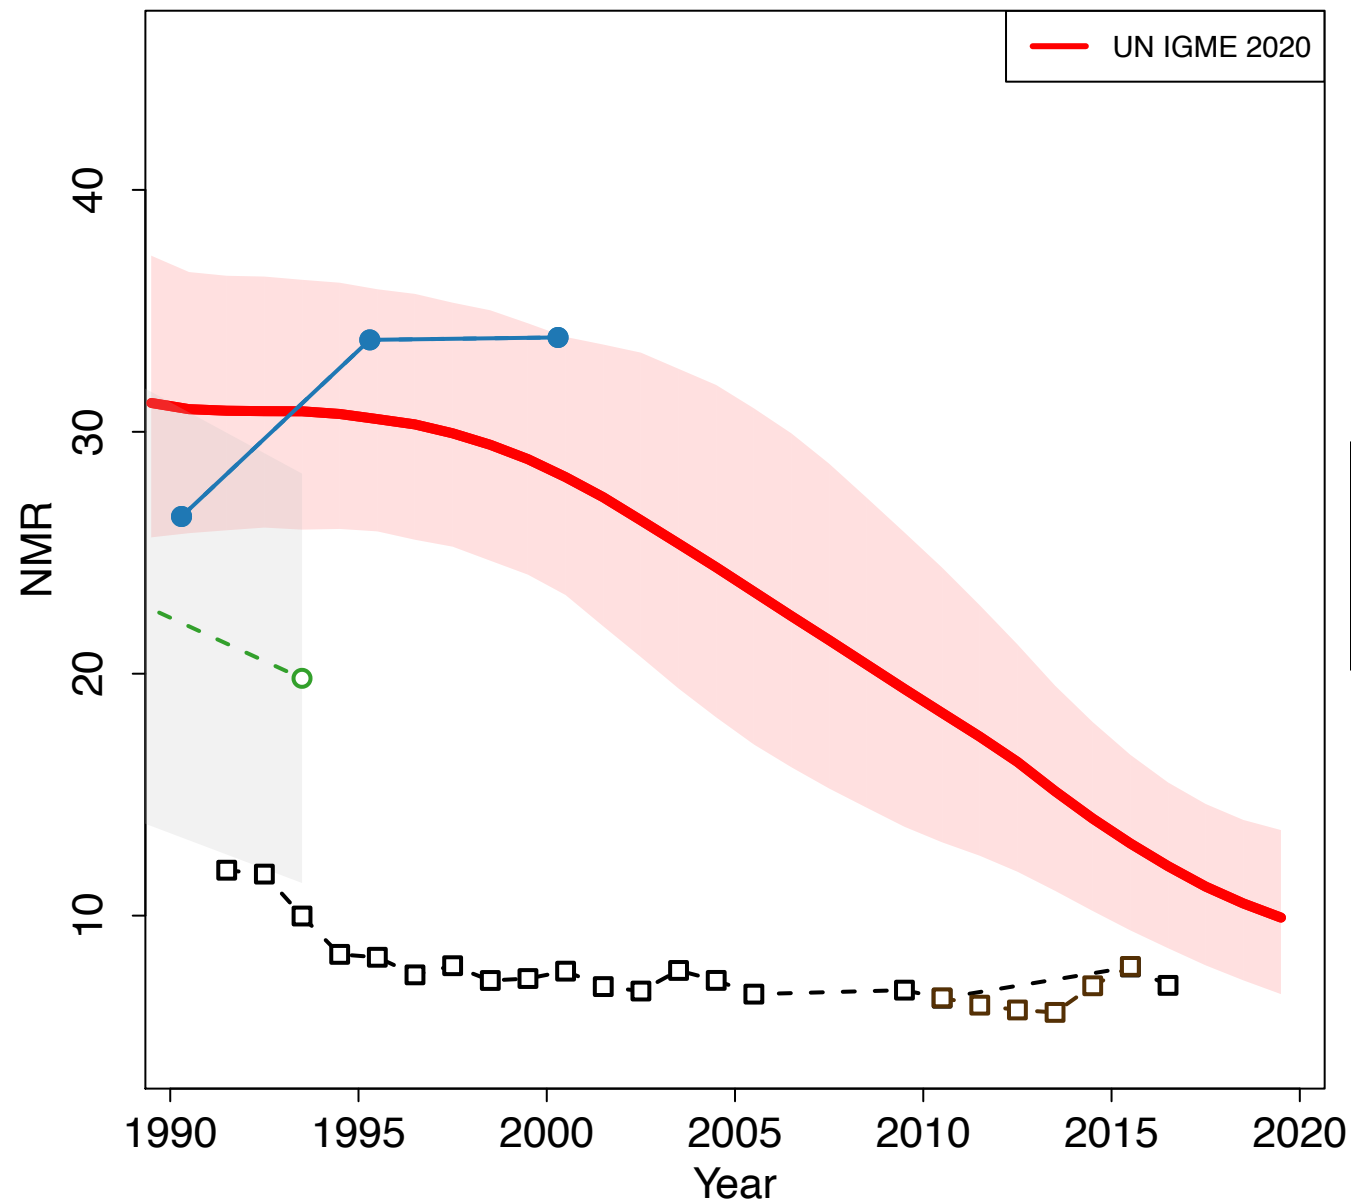

# Vanuatu

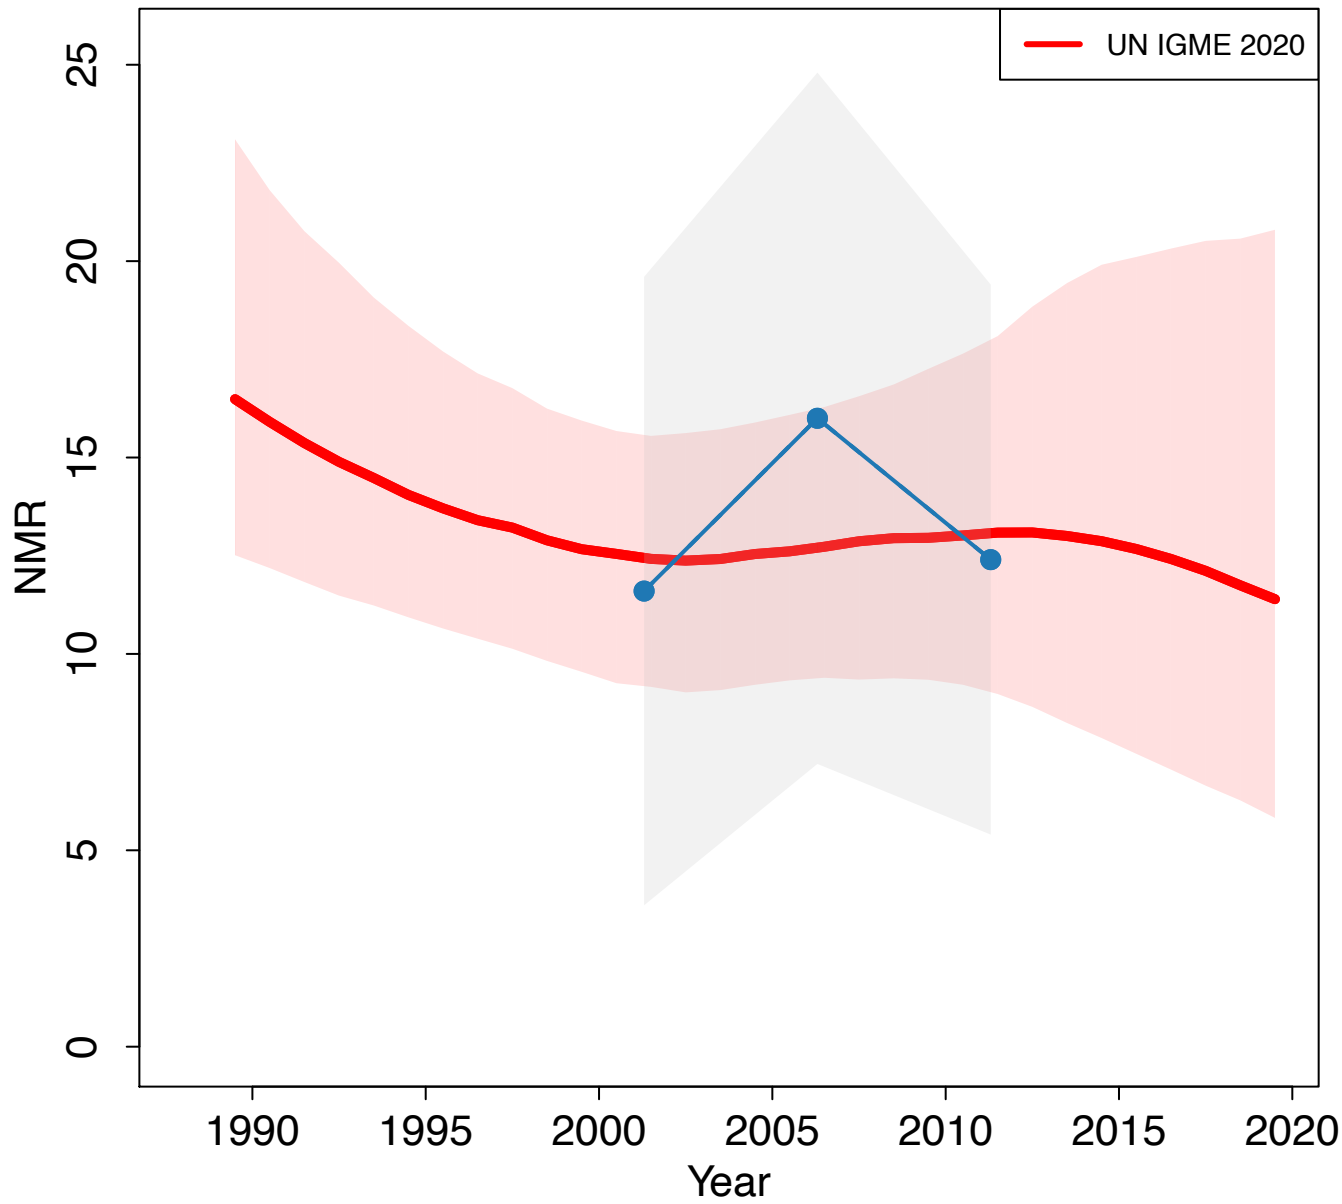

# Zoomed in

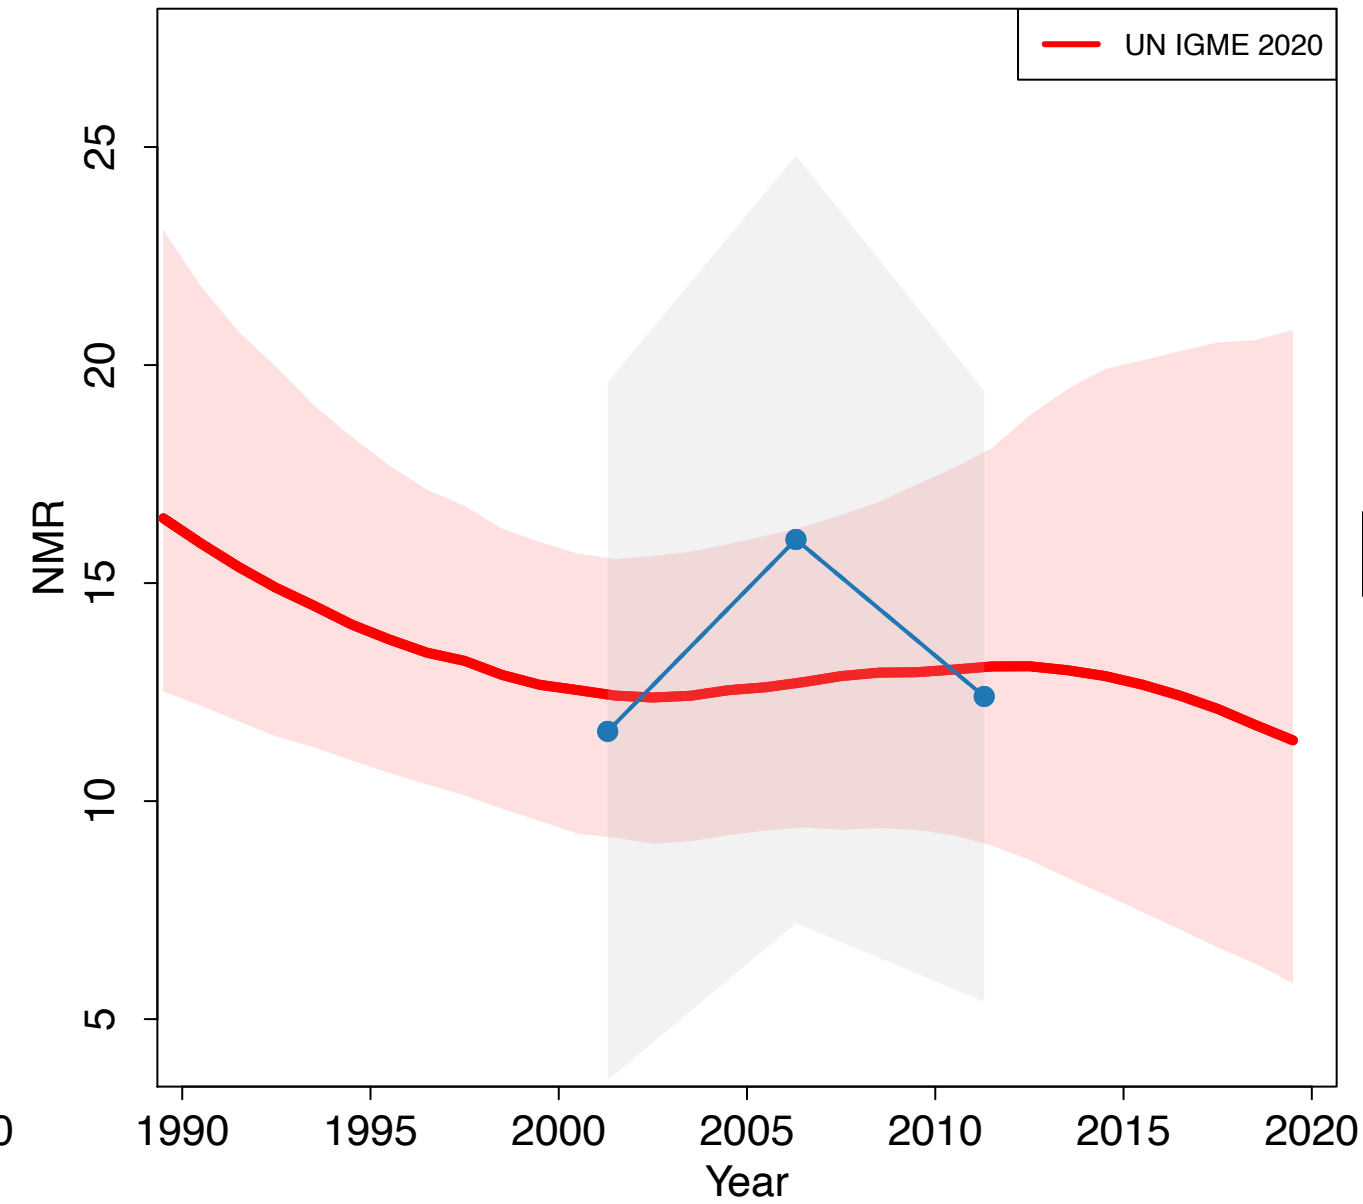

# Venezuela (Bolivarian Republic of)

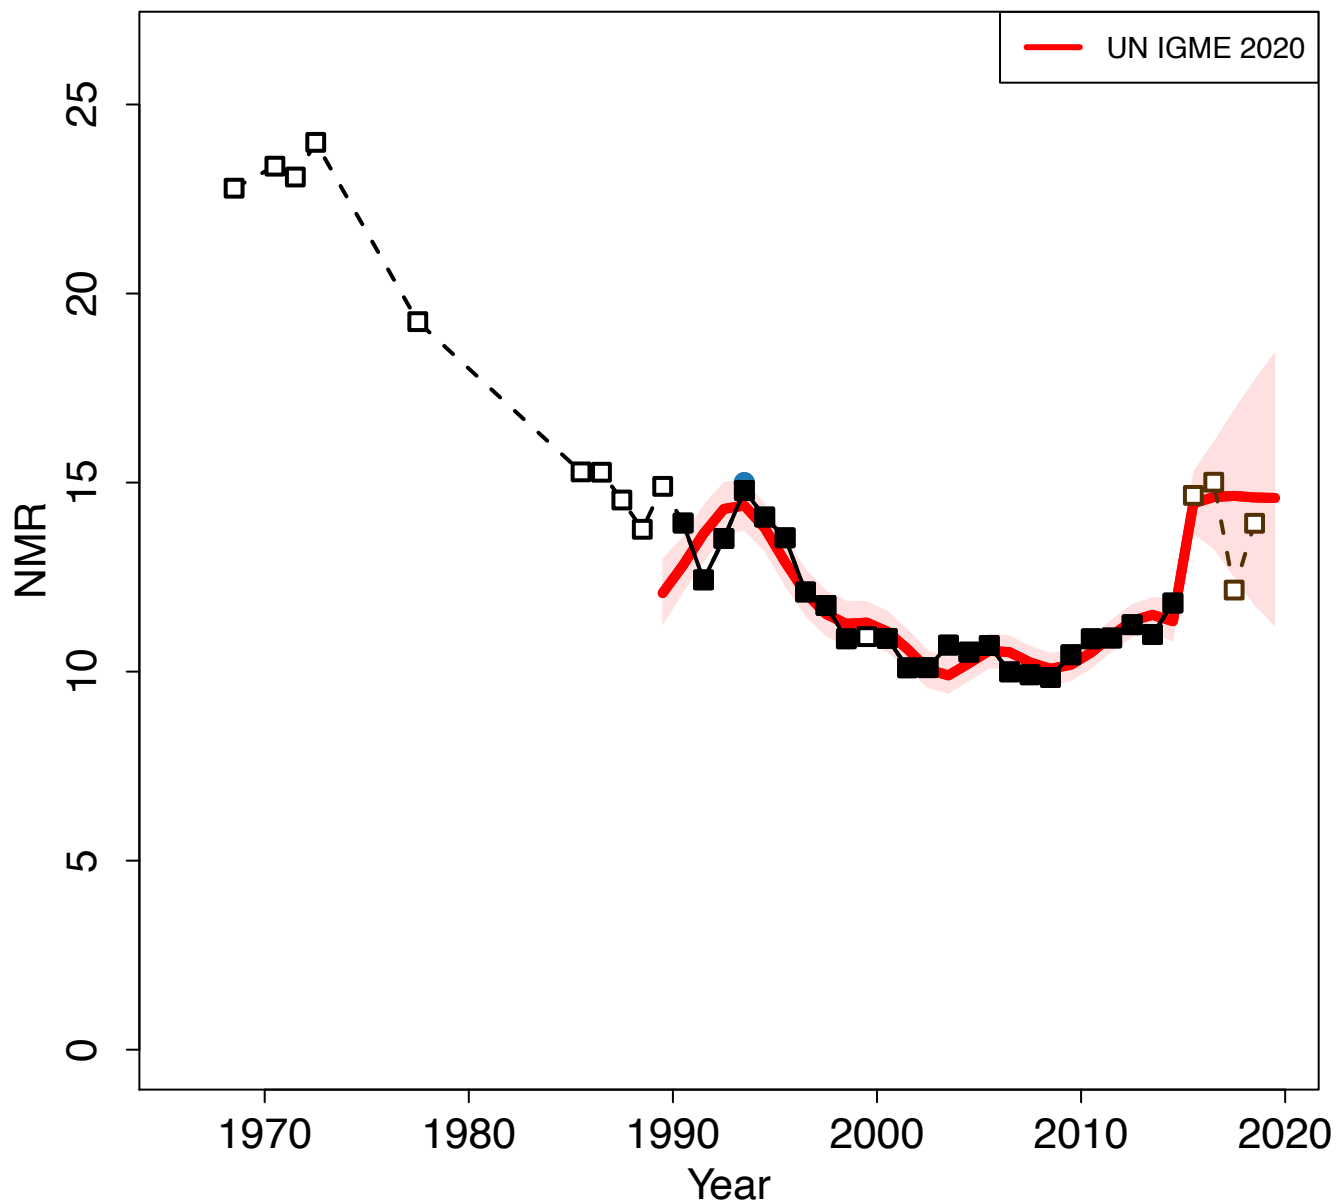

# Zoomed in

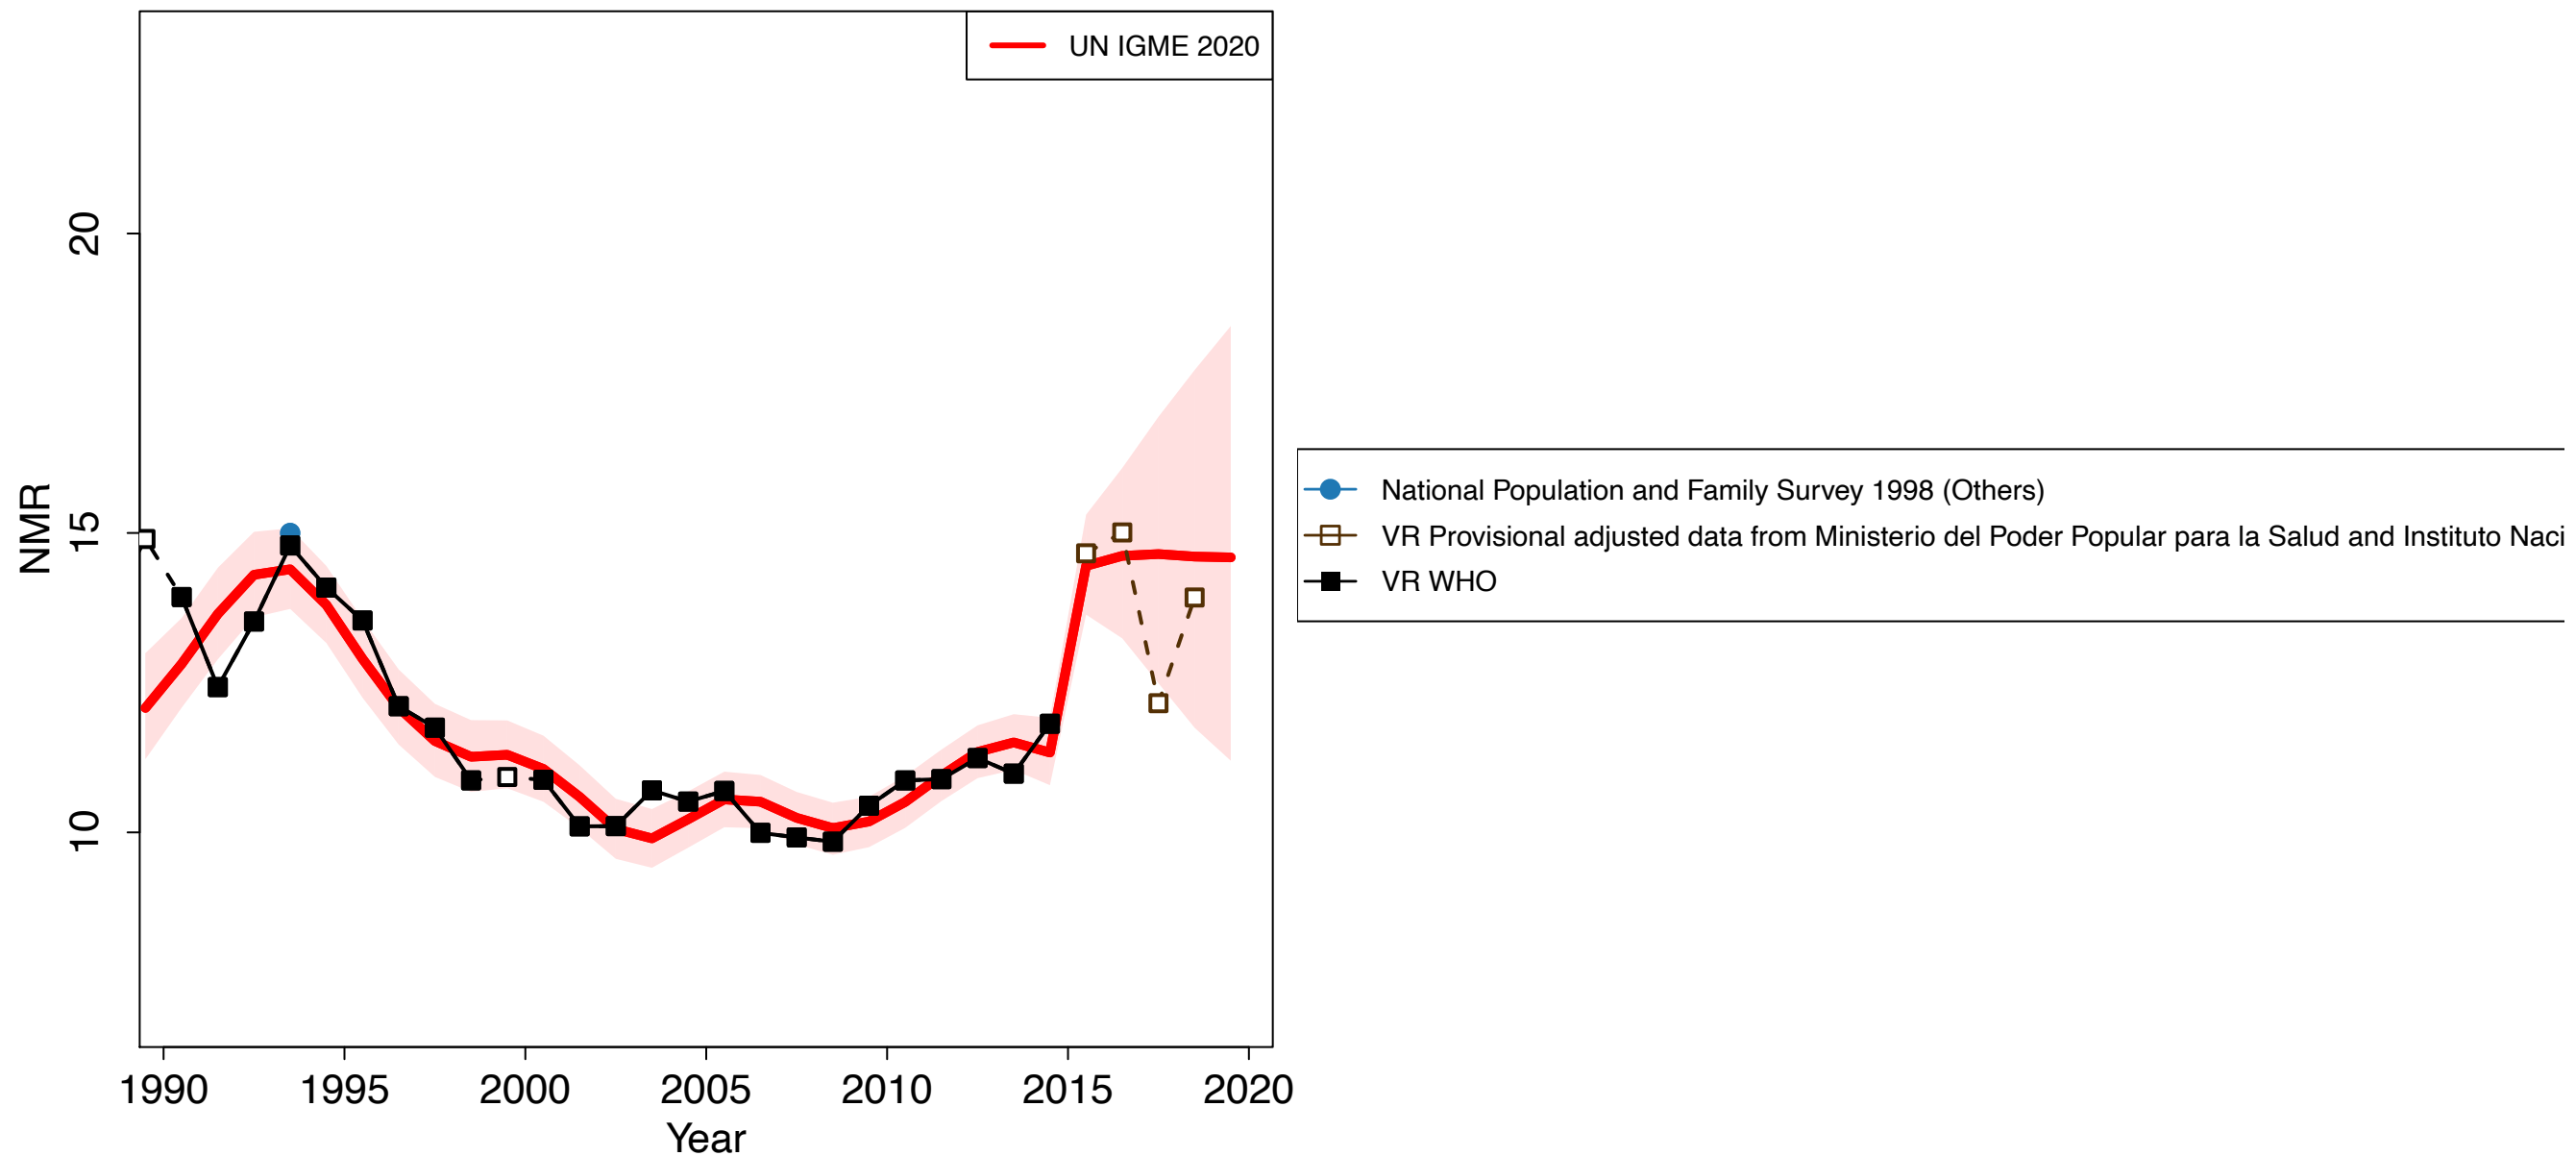

# Viet Nam

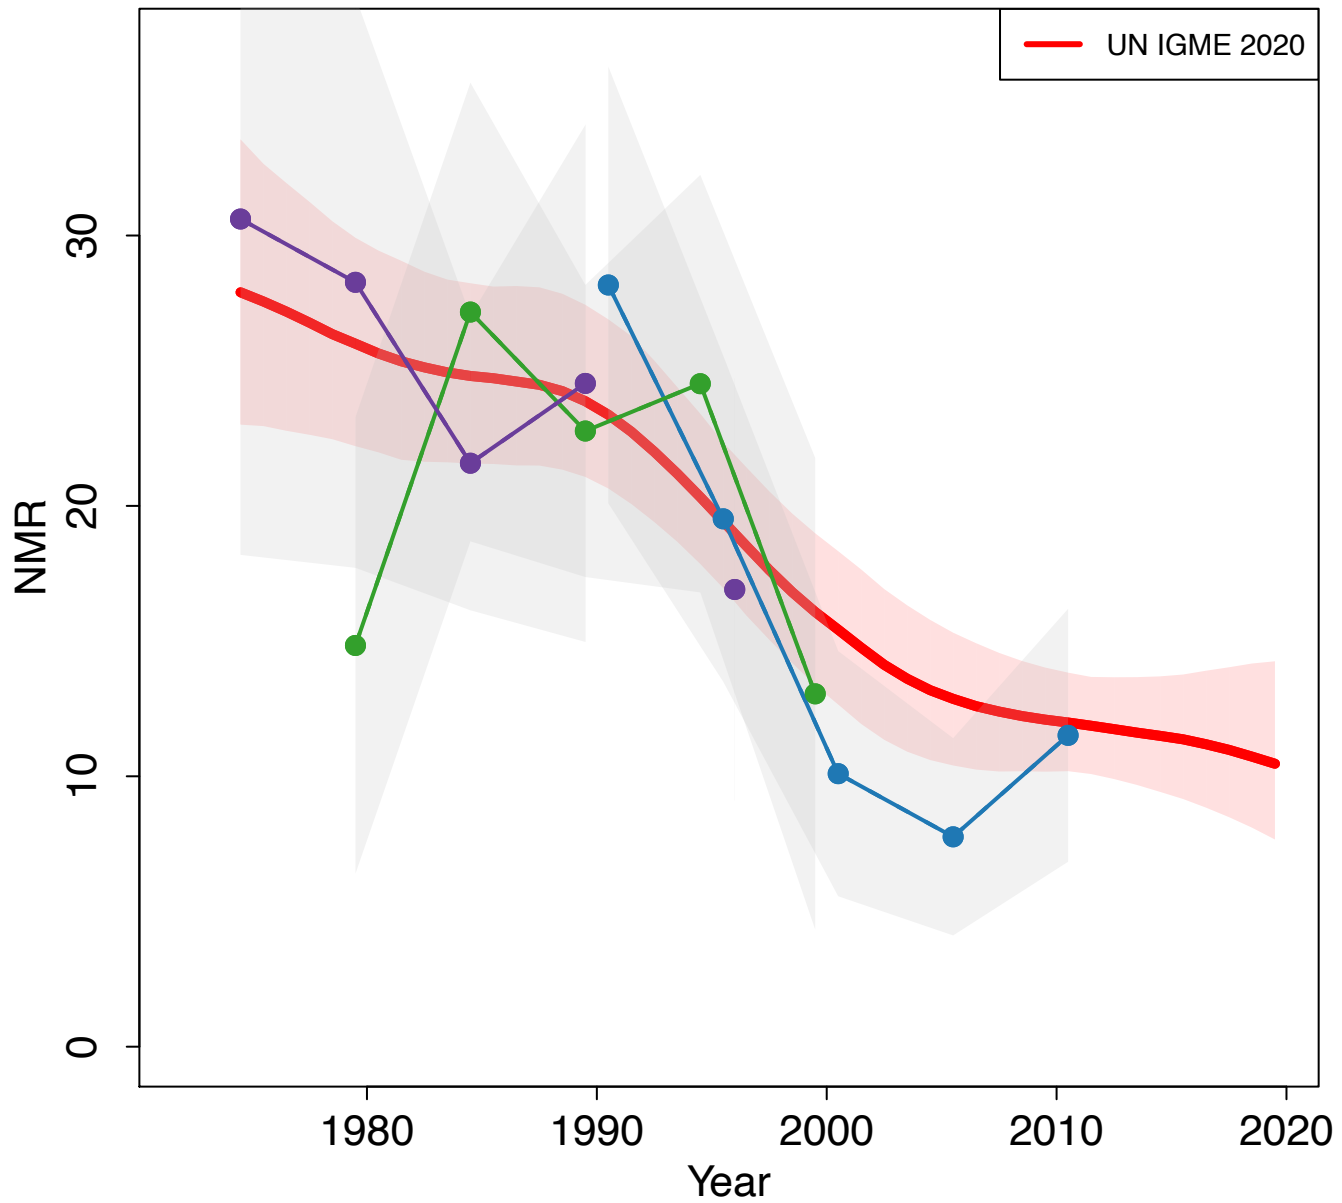

# Zoomed in

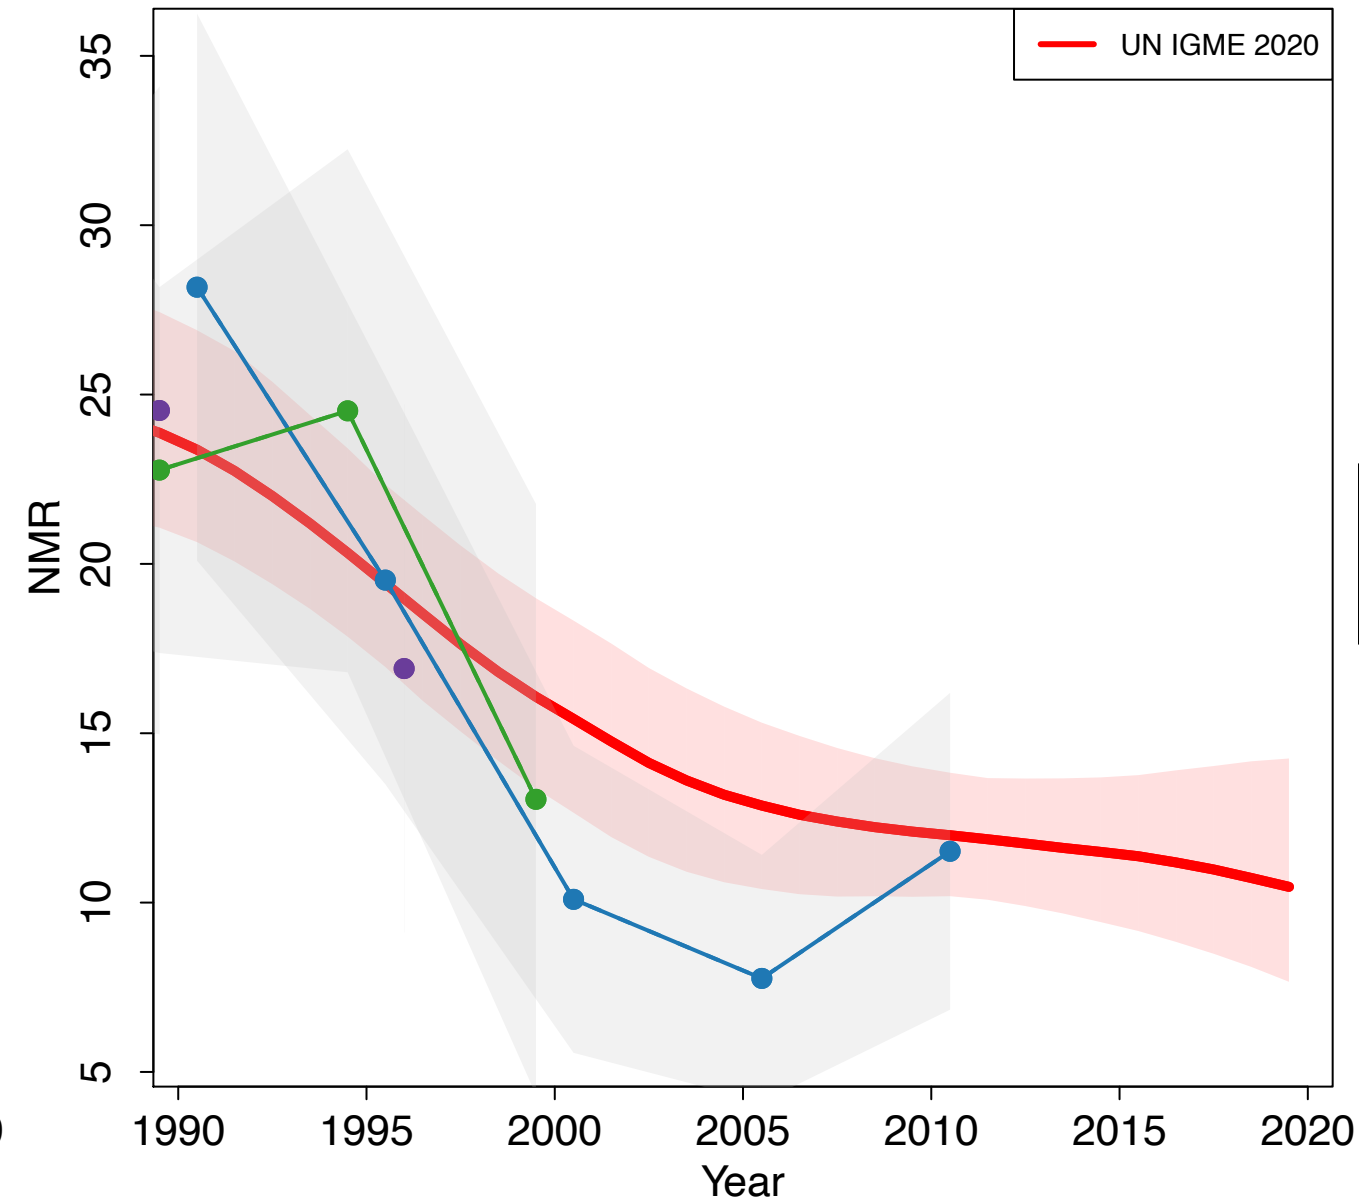

# Yemen

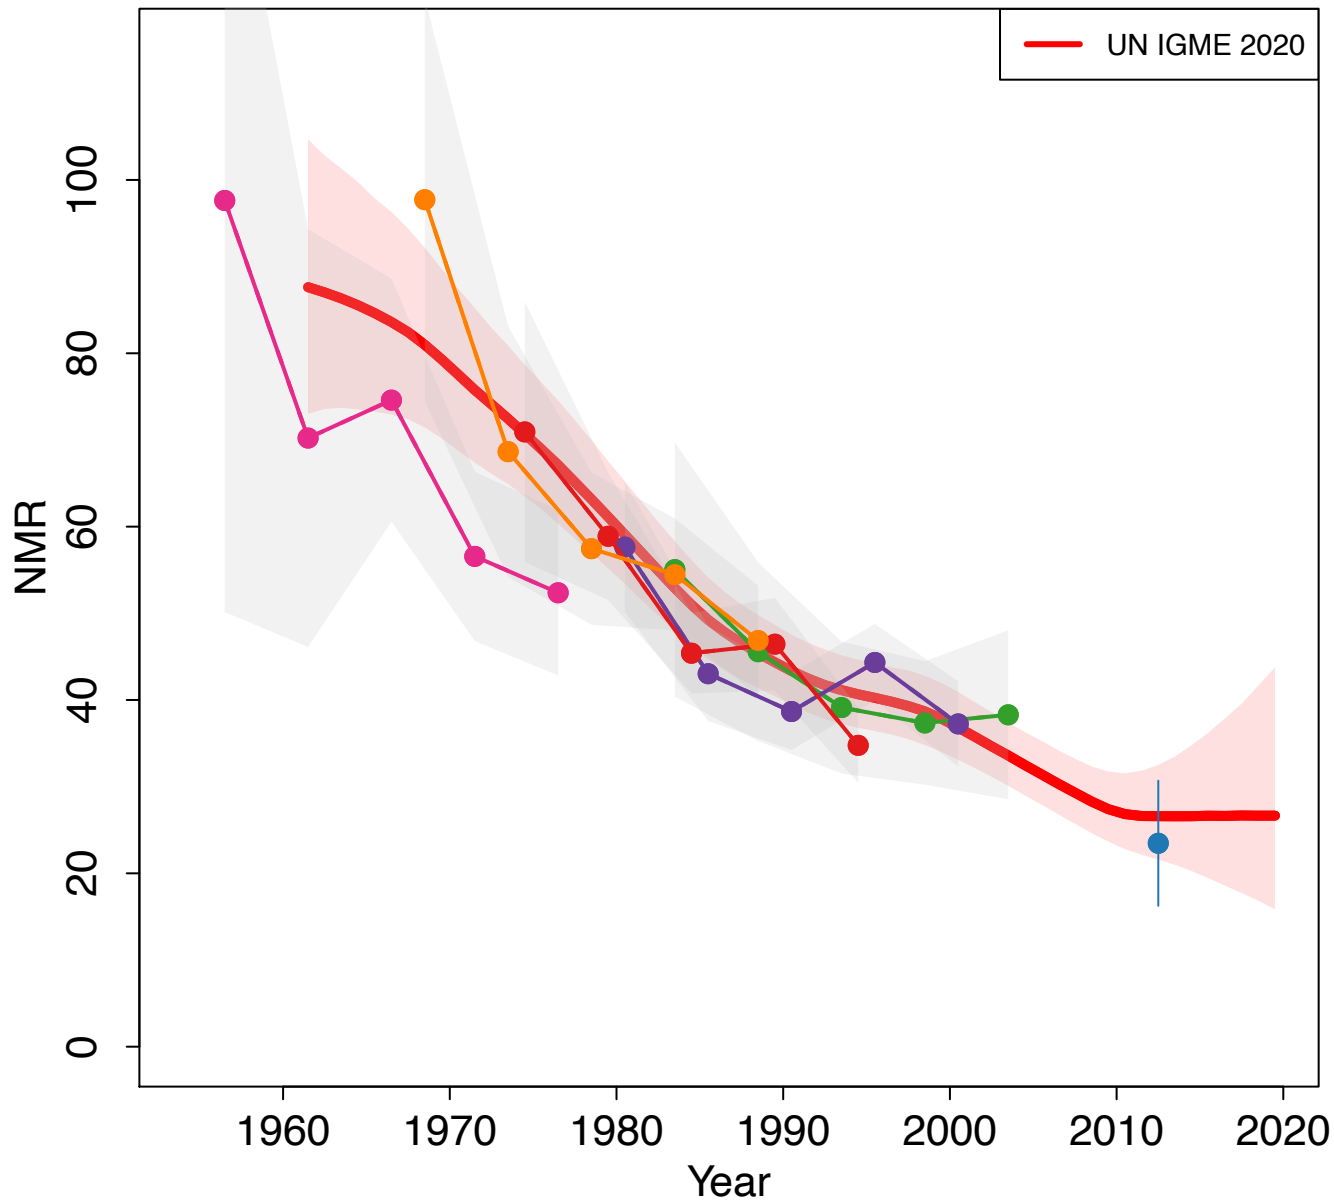

# Zoomed in

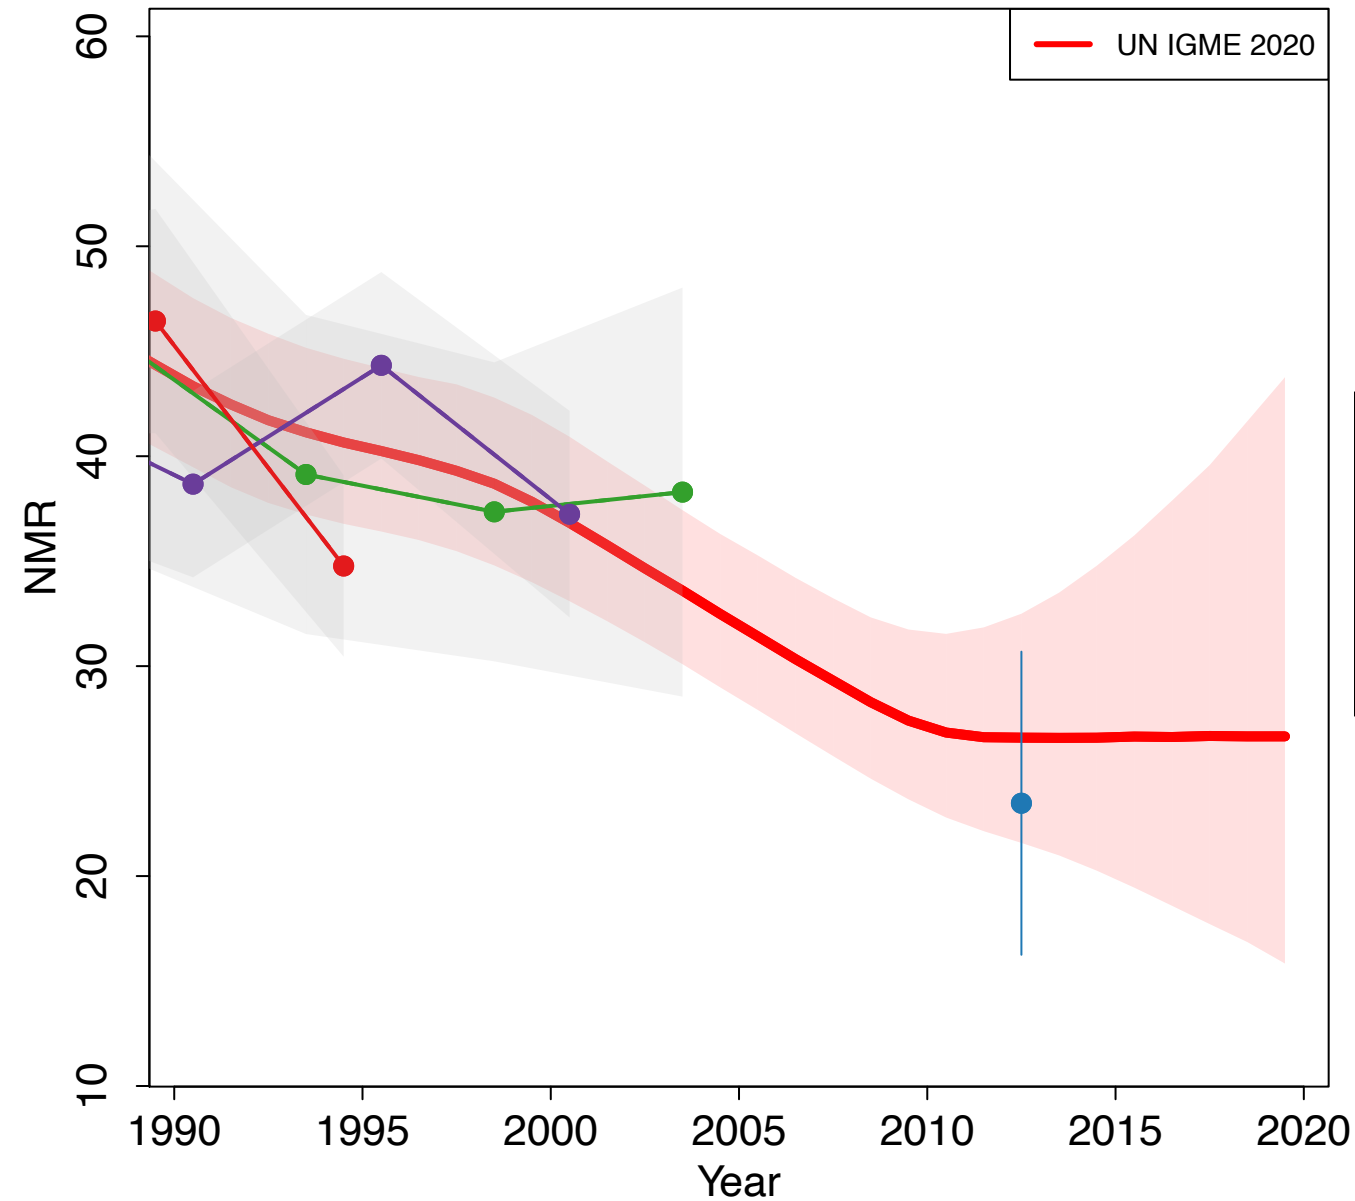

- World Fertility Survey 1979 (Other DHS)
- Demographic and Health Survey 1991-1992 (DHS)
- Demographic and Health Survey 1997 (DHS)
- PAPFAM Family Health Survey 2003 (Others)
- Multiple Indicator Cluster Survey 2006 (MICS)
- Demographic and Health Survey 2013 (DHS)

# Zambia

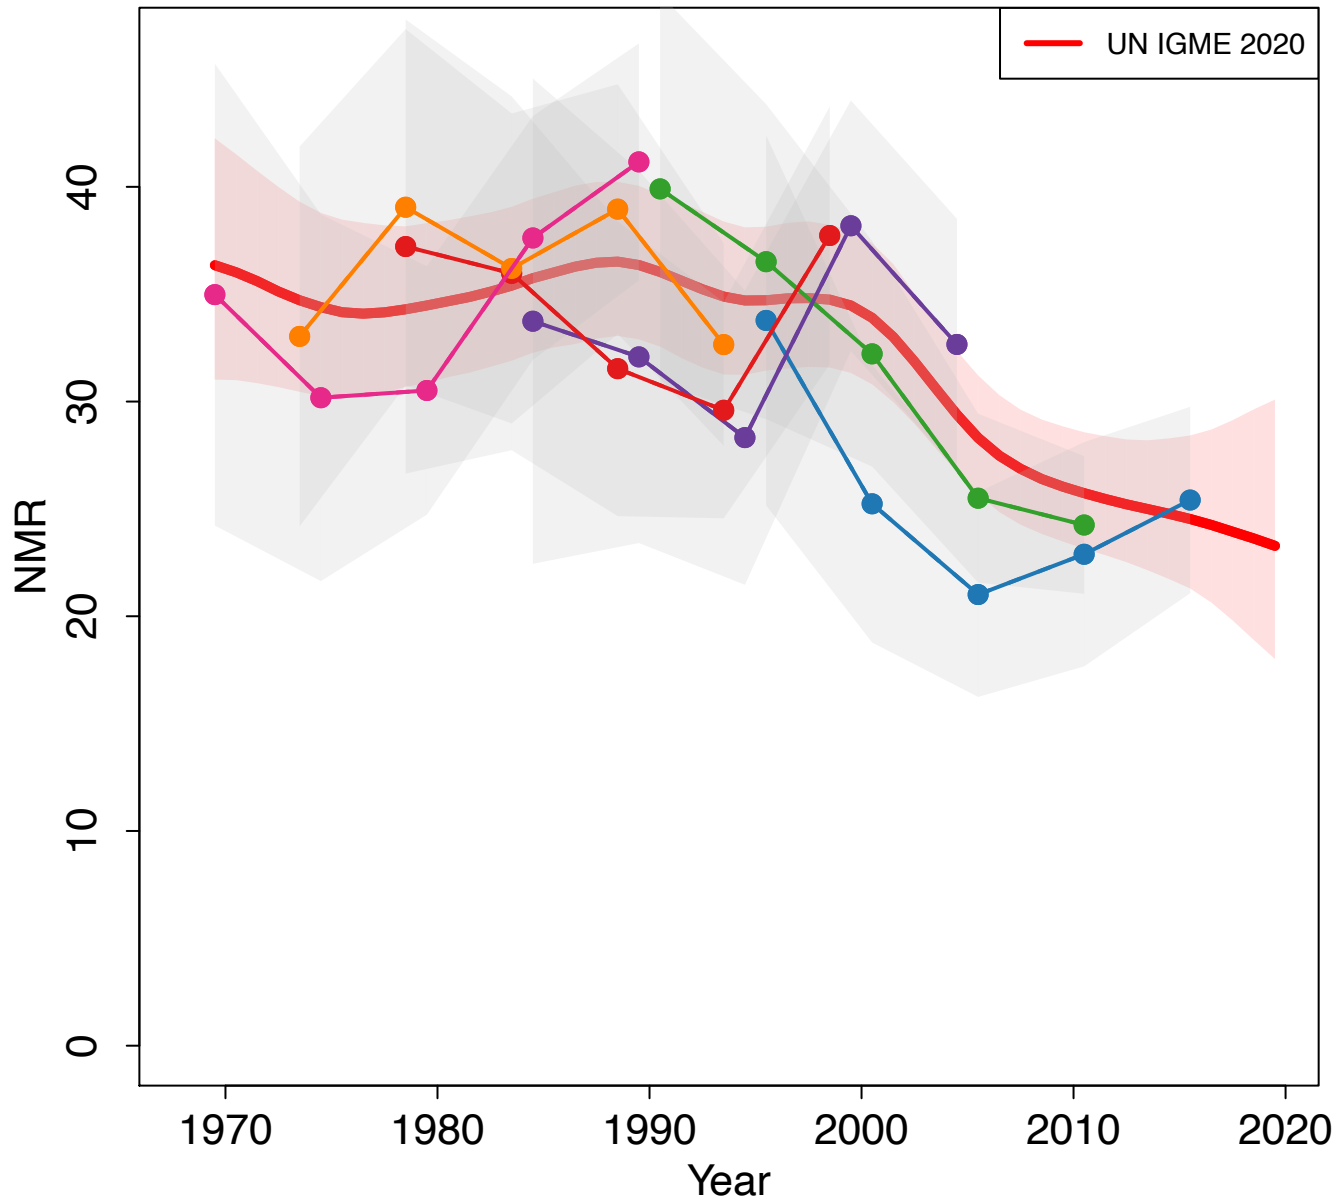

# Zoomed in

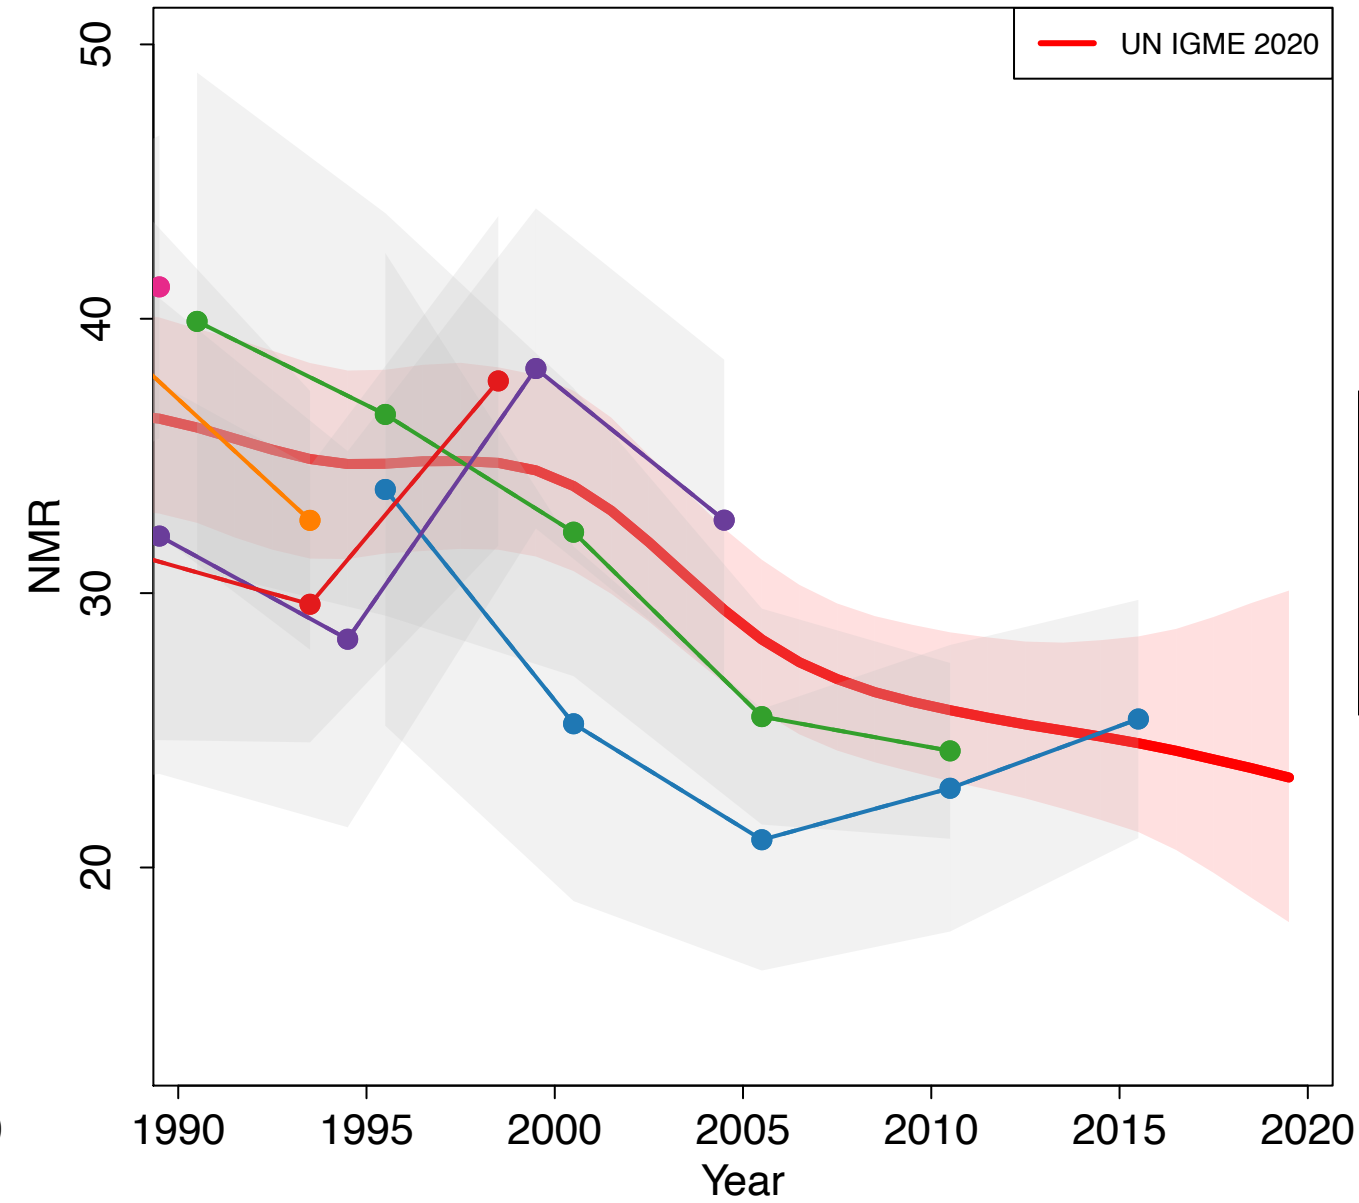

- Demographic and Health Survey 1992 (DHS)
- Demographic and Health Survey 1996-1997 (DHS)
- Demographic and Health Survey 2001-2002 (DHS)
- Demographic and Health Survey 2007 (DHS)
- Demographic and Health Survey 2013-2014 (DHS)
- Demographic and Health Survey 2018 (DHS)

# Zimbabwe

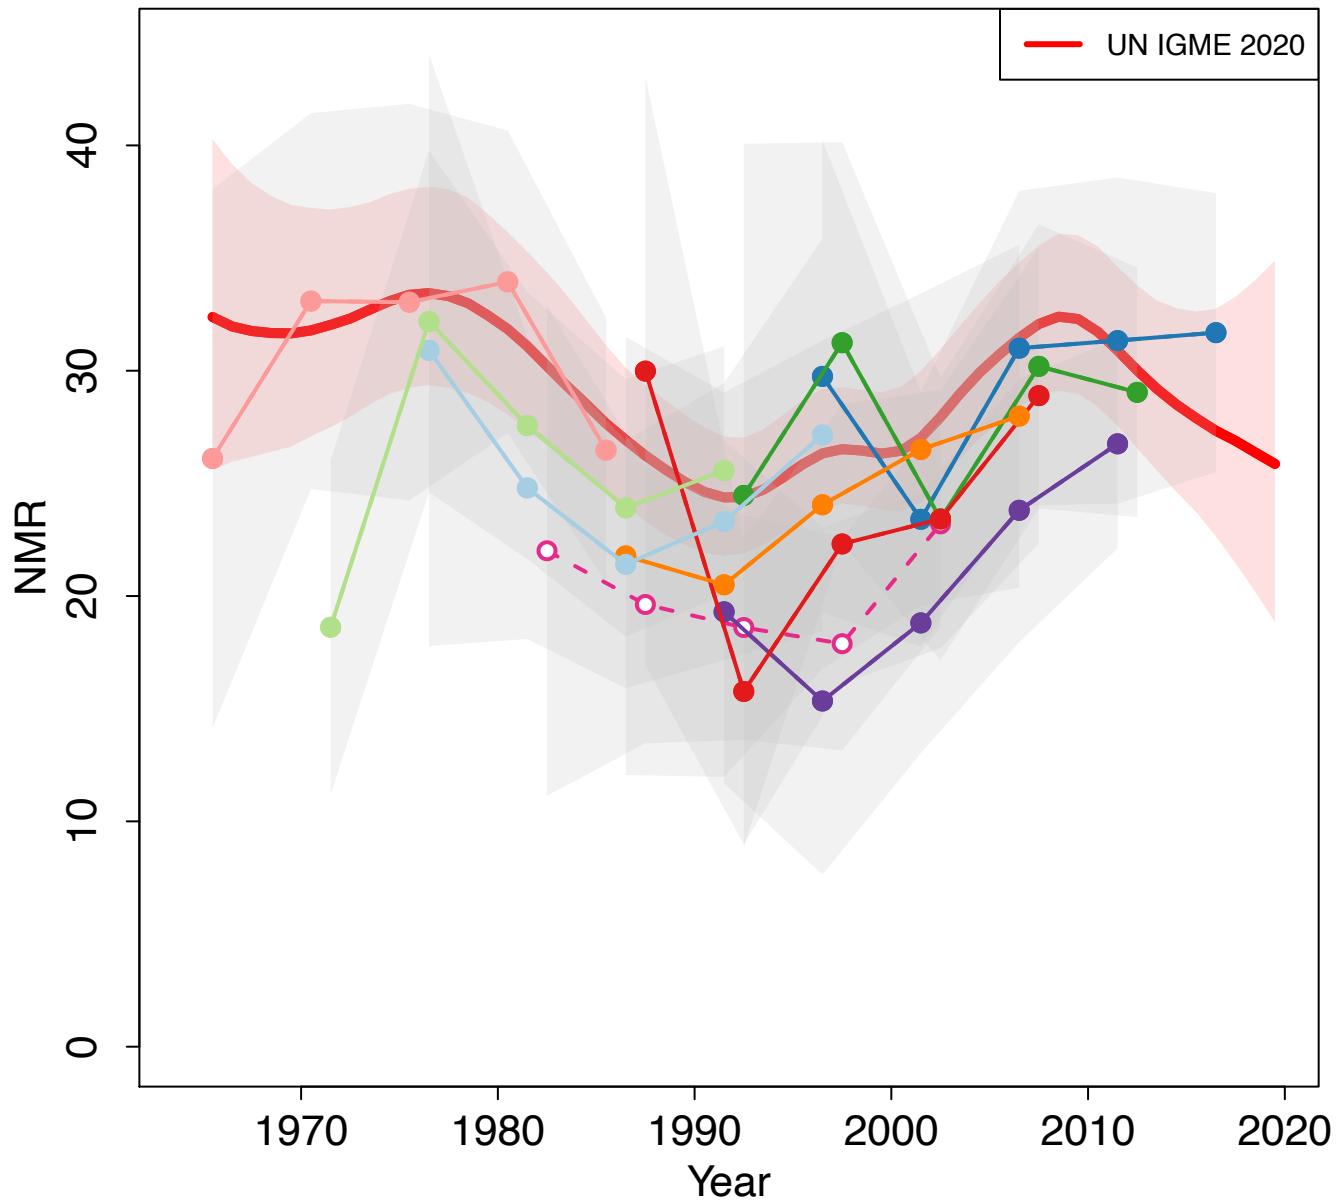

# Zoomed in

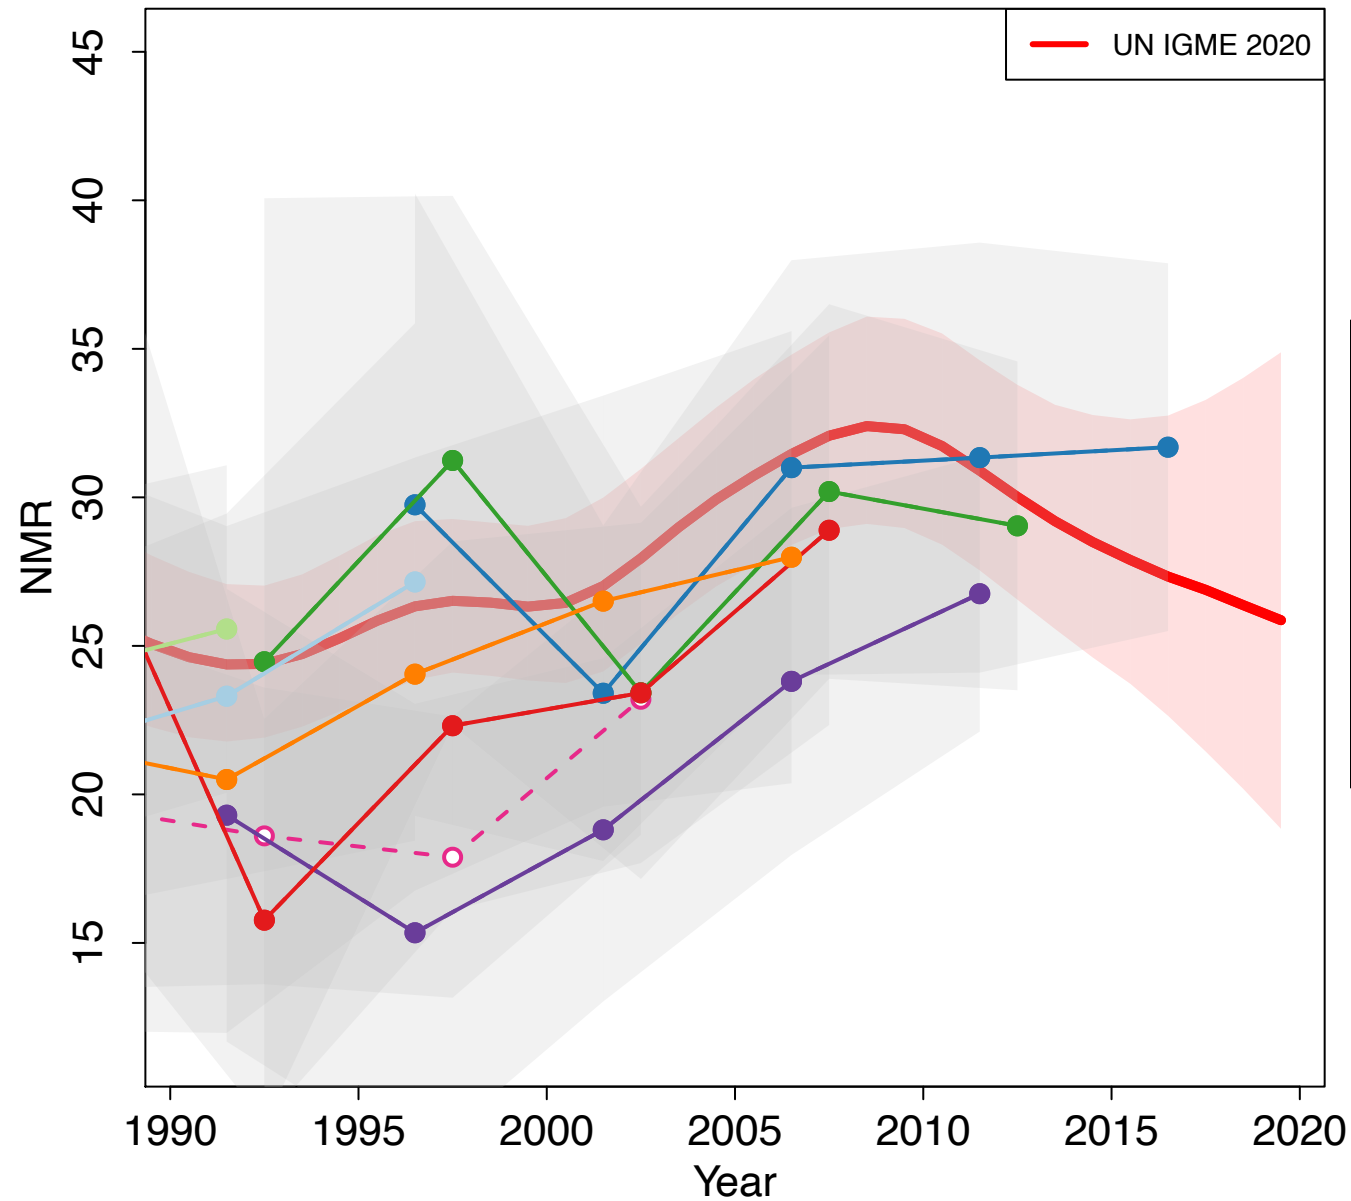

Supplement: mmc1.pdf [file mmc1.pdf]
